# Supplementary material for: A high-resolution lithospheric magnetic field model over southern Africa based on a joint inversion of CHAMP, Swarm, WDMAM, and ground magnetic field data
Source: Copernicus journal article supplement (doi:10.5194/se-9-897-2018), 2018-07-16
Supplement: Supplementary file 1 [file se-9-897-2018-supplement.zip]

Archive with 12 entries (11 files):
- se-9-897-2018-supplement-title-page.pdf
- SupplementaryMaterial/
- SupplementaryMaterial/ModelSA0km.txt
- SupplementaryMaterial/ModelSA350km.txt
- SupplementaryMaterial/ModelSA100km.txt
- SupplementaryMaterial/ModelSA50km.txt
- SupplementaryMaterial/ModelSA200km.txt
- SupplementaryMaterial/ReadMe.pdf
- SupplementaryMaterial/ModelSA150km.txt
- SupplementaryMaterial/ModelSA250km.txt
- SupplementaryMaterial/ModelSA300km.txt
- SupplementaryMaterial/ModelSA400km.txt
