# Supplementary material for: A high-resolution lithospheric magnetic field model over southern Africa based on a joint inversion of CHAMP, Swarm, WDMAM, and ground magnetic field data
Source: Copernicus journal article supplement (doi:10.5194/se-9-897-2018), 2018-07-16
Supplement: Supplementary file 1 [file se-9-897-2018-supplement.zip › se-9-897-2018-supplement-title-page.pdf]

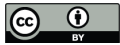

## *Supplement of*

# **A high-resolution lithospheric magnetic field model over southern Africa based on a joint inversion of CHAMP, Swarm, WDMAM, and ground magnetic field data**

**Foteini Vervelidou et al.**

*Correspondence to:* Foteini Vervelidou ([foteini@gfz-potsdam.de](mailto:foteini@gfz-potsdam.de))

- [se-9-897-2018-supplement-title-page.pdf](#)
- SupplementaryMaterial
  - [ModelSA0km.txt](#)
  - [ModelSA100km.txt](#)
  - [ModelSA150km.txt](#)
  - [ModelSA200km.txt](#)
  - [ModelSA250km.txt](#)
  - [ModelSA300km.txt](#)
  - [ModelSA350km.txt](#)
  - [ModelSA400km.txt](#)
  - [ModelSA50km.txt](#)
  - [ReadMe.pdf](#)

The copyright of individual parts of the supplement might differ from the CC BY 4.0 License.
