# Supplementary material for: A high-resolution lithospheric magnetic field model over southern Africa based on a joint inversion of CHAMP, Swarm, WDMAM, and ground magnetic field data
Source: Copernicus journal article supplement (doi:10.5194/se-9-897-2018), 2018-07-16
Supplement: Supplementary file 1 [file se-9-897-2018-supplement.zip › SupplementaryMaterial/ModelSA0km.txt]

   2.2500005e+01  -2.4999991e+01   0.0000000e+00   2.4693166e+01  -8.2066366e+01  -3.7131509e+01
   2.2566483e+01  -2.5124977e+01   0.0000000e+00  -1.2402547e+01  -1.0681520e+02  -5.6559859e+01
   2.2649272e+01  -2.5030796e+01   0.0000000e+00   4.2832385e+01  -1.0060360e+02  -8.2635633e+01
   2.2619593e+01  -2.4913455e+01   0.0000000e+00   5.4455521e+01  -7.1399403e+01  -5.3019458e+01
   2.2500000e+01  -2.4861269e+01   0.0000000e+00   4.6443786e+01  -6.9448691e+01  -2.7448222e+01
   2.2380407e+01  -2.4913455e+01   0.0000000e+00   3.3290635e+01  -6.1936730e+01  -7.0045087e+00
   2.2350728e+01  -2.5030796e+01   0.0000000e+00   1.4149994e+01  -6.0796003e+01  -1.3943067e+01
   2.2433517e+01  -2.5124977e+01   0.0000000e+00  -1.1424835e+01  -7.2057807e+01  -2.1234724e+01
   2.2791110e+01  -2.5050403e+01   0.0000000e+00   7.5612798e+01  -1.0819550e+02  -1.2816224e+02
   2.2783469e+01  -2.4922052e+01   0.0000000e+00   9.1731301e+01  -6.3453607e+01  -4.2283228e+01
   2.2711005e+01  -2.4811602e+01   0.0000000e+00   7.1526977e+01  -4.6922183e+01  -3.6641655e+01
   2.2590406e+01  -2.4744279e+01   0.0000000e+00   7.0661892e+01  -5.2025647e+01  -2.2206004e+01
   2.2449214e+01  -2.4735429e+01   0.0000000e+00   5.0126807e+01  -5.2289687e+01   2.0972768e+00
   2.2319588e+01  -2.4787069e+01   0.0000000e+00   3.5828964e+01  -3.9981632e+01   2.1756830e+01
   2.2231095e+01  -2.4887431e+01   0.0000000e+00   2.1274260e+01  -2.8829209e+01   2.4802689e+01
   2.2204049e+01  -2.5013608e+01   0.0000000e+00   1.0135397e+01  -4.3488420e+01   1.5585980e+01
   2.2244821e+01  -2.5136726e+01   0.0000000e+00  -8.4489733e+00  -5.4144614e+01   3.8351346e+00
   2.2344231e+01  -2.5228534e+01   0.0000000e+00  -2.8337608e+01  -5.1645063e+01   6.2834923e+00
   2.2479512e+01  -2.5267912e+01   0.0000000e+00  -5.1701130e+01  -6.5996988e+01   1.5389382e+01
   2.2619515e+01  -2.5245788e+01   0.0000000e+00  -7.1649521e+01  -1.1216076e+02  -3.2069865e+01
   2.2731985e+01  -2.5167260e+01   0.0000000e+00  -3.3146312e+01  -1.2800644e+02  -1.3245700e+02
   2.2627648e+01  -2.4622121e+01   0.0000000e+00   7.1175701e+01  -2.9719781e+01   2.3114521e+01
   2.2485785e+01  -2.4604968e+01   0.0000000e+00   4.2404559e+01  -2.9410422e+01   1.5655295e+01
   2.2345448e+01  -2.4630489e+01   0.0000000e+00   3.3344133e+01  -3.3356345e+01   2.5702772e+01
   2.2221716e+01  -2.4695945e+01   0.0000000e+00   3.1421813e+01   4.4925258e+00   3.5721834e+01
   2.2127926e+01  -2.4794296e+01   0.0000000e+00   4.1913920e+00   3.7816393e+01   1.5186171e+01
   2.2074261e+01  -2.4914949e+01   0.0000000e+00  -1.8706524e+01   2.1719176e+01   2.2691096e+01
   2.2066638e+01  -2.5044874e+01   0.0000000e+00  -1.2539754e+01  -1.0712464e+01   4.4246330e+01
   2.2106024e+01  -2.5169999e+01   0.0000000e+00  -1.0599835e+01  -3.2480860e+01   5.3113131e+01
   2.2188274e+01  -2.5276731e+01   0.0000000e+00  -1.5795847e+01  -4.1612294e+01   5.2812010e+01
   2.2304526e+01  -2.5353443e+01   0.0000000e+00  -2.0099444e+01  -3.6444513e+01   4.4456620e+01
   2.2442139e+01  -2.5391760e+01   0.0000000e+00  -3.1619209e+01  -3.4211402e+01   6.4241836e+01
   2.2586081e+01  -2.5387492e+01   0.0000000e+00  -4.9944637e+01  -7.8944527e+01   7.0712836e+01
   2.2720608e+01  -2.5341106e+01   0.0000000e+00  -8.4856896e+01  -1.0644567e+02   3.6709160e+00
   2.2831035e+01  -2.5257672e+01   0.0000000e+00  -1.0888654e+02  -1.0789945e+02  -1.0164505e+02
   2.2905370e+01  -2.5146297e+01   0.0000000e+00  -1.6985052e+01  -1.2968608e+02  -2.0133672e+02
   2.2935626e+01  -2.5019107e+01   0.0000000e+00   1.2633120e+02  -1.3650366e+02  -1.3880119e+02
   2.2918657e+01  -2.4889911e+01   0.0000000e+00   1.1147657e+02  -9.6228555e+01  -9.3561239e+00
   2.2856438e+01  -2.4772694e+01   0.0000000e+00   7.0713820e+01  -6.3821681e+01  -4.8183472e+00
   2.2755800e+01  -2.4680108e+01   0.0000000e+00   8.9372388e+01  -4.7581386e+01   6.1639724e+00
   2.2005477e+01  -2.4730152e+01   0.0000000e+00   5.6685935e-01   8.3579328e+01  -7.6797272e+01
   2.1948449e+01  -2.4845263e+01   0.0000000e+00  -4.6278533e+01   5.4526682e+01  -6.9239668e+01
   2.1923356e+01  -2.4969413e+01   0.0000000e+00  -4.4561822e+01   3.7073091e+01  -8.2237878e+00
   2.1931748e+01  -2.5095402e+01   0.0000000e+00  -1.5434355e+01   3.2921168e+01   4.5298941e+01
   2.1973238e+01  -2.5215904e+01   0.0000000e+00   1.2947845e+01   3.3109813e+01   7.8428026e+01
   2.2045499e+01  -2.5323890e+01   0.0000000e+00   2.1889542e+01   2.6622456e+01   9.4261697e+01
   2.2144380e+01  -2.5413044e+01   0.0000000e+00   1.7731740e+01  -3.0585635e+00   8.9604261e+01
   2.2264136e+01  -2.5478137e+01   0.0000000e+00   1.2866020e+01  -1.7858739e+01   6.5286005e+01
   2.2397759e+01  -2.5515346e+01   0.0000000e+00   1.1057096e+01  -1.8146183e+01   7.5276477e+01
   2.2537398e+01  -2.5522483e+01   0.0000000e+00   1.9234003e+01  -6.0012491e+01   9.3161130e+01
   2.2674836e+01  -2.5499126e+01   0.0000000e+00   1.6802887e+01  -1.0261745e+02   5.8444449e+01
   2.2801990e+01  -2.5446650e+01   0.0000000e+00  -1.4644908e+01  -8.7500119e+01   3.0199095e+01
   2.2911403e+01  -2.5368141e+01   0.0000000e+00  -9.0199853e+01  -9.4859998e+01   2.6395484e+01
   2.2996693e+01  -2.5268206e+01   0.0000000e+00  -1.3247432e+02  -1.4085891e+02  -9.6254207e+01
   2.3052932e+01  -2.5152698e+01   0.0000000e+00  -4.5388292e+01  -1.5067740e+02  -2.7072219e+02
   2.3076921e+01  -2.5028363e+01   0.0000000e+00   1.1994471e+02  -1.6916564e+02  -2.6915809e+02
   2.3067361e+01  -2.4902443e+01   0.0000000e+00   1.5533536e+02  -1.5736066e+02  -9.6042029e+01
   2.3024906e+01  -2.4782247e+01   0.0000000e+00   6.9291101e+01  -1.1917866e+02  -2.8012226e+01
   2.2952106e+01  -2.4674736e+01   0.0000000e+00   7.3036964e+01  -1.0975057e+02  -1.9718627e+01
   2.2853234e+01  -2.4586117e+01   0.0000000e+00   8.3683274e+01  -7.7211426e+01   4.8012355e+01
   2.2734035e+01  -2.4521494e+01   0.0000000e+00   4.3679091e+01  -2.9550657e+01   6.7217999e+01
   2.2601387e+01  -2.4484584e+01   0.0000000e+00   1.9880020e+01  -1.1959658e+01   3.5741164e+01
   2.2462919e+01  -2.4477508e+01   0.0000000e+00   1.8114455e+01  -2.2558562e+01   9.0254997e+00
   2.2326579e+01  -2.4500672e+01   0.0000000e+00   2.6393109e+01  -3.8809674e+01   2.6226672e+01
   2.2200199e+01  -2.4552745e+01   0.0000000e+00   4.4078473e+01   4.8627772e+00   5.2097052e+01
   2.2091059e+01  -2.4630734e+01   0.0000000e+00   4.4600192e+01   7.3666387e+01  -1.7929187e+00
   2.1844868e+01  -2.5273528e+01   0.0000000e+00   7.2248948e+01   8.6417141e+01   1.3723068e+01
   2.1916247e+01  -2.5384116e+01   0.0000000e+00   7.9336225e+01   1.1971468e+02   2.2224898e+01
   2.2010268e+01  -2.5479941e+01   0.0000000e+00   5.1475005e+01   9.8482506e+01   6.4211870e+01
   2.2123330e+01  -2.5557281e+01   0.0000000e+00   3.8736151e+01   2.9172983e+01   7.8988721e+01
   2.2251066e+01  -2.5613127e+01   0.0000000e+00   3.4899196e+01  -2.8575623e+00   6.0092710e+01
   2.2388512e+01  -2.5645302e+01   0.0000000e+00   3.9942699e+01  -2.2181102e+01   6.7232768e+01
   2.2530311e+01  -2.5652548e+01   0.0000000e+00   5.4043928e+01  -6.9349306e+01   5.9247693e+01
   2.2670926e+01  -2.5634584e+01   0.0000000e+00   5.1494988e+01  -1.0386444e+02   9.2804838e+00
   2.2804870e+01  -2.5592111e+01   0.0000000e+00   4.4682816e+01  -8.6453656e+01  -3.2453455e+01
   2.2926927e+01  -2.5526786e+01   0.0000000e+00   2.6688666e+01  -8.2148858e+01   1.7854549e+01
   2.3032366e+01  -2.5441153e+01   0.0000000e+00  -3.7113485e+01  -2.0474505e+02   3.4007356e+01
   2.3117126e+01  -2.5338544e+01   0.0000000e+00  -5.1567119e+01  -2.6178588e+02  -1.3057678e+02
   2.3177977e+01  -2.5222939e+01   0.0000000e+00  -4.2377613e+01  -1.1499199e+02  -2.9194625e+02
   2.3212635e+01  -2.5098809e+01   0.0000000e+00  -6.3325442e+00  -3.6866090e+01  -4.0793180e+02
   2.3219844e+01  -2.4970944e+01   0.0000000e+00   1.4912567e+02  -8.8010746e+01  -3.5581869e+02
   2.3199412e+01  -2.4844261e+01   0.0000000e+00   1.5741802e+02  -1.0181353e+02  -1.4797813e+02
   2.3152206e+01  -2.4723616e+01   0.0000000e+00   6.0575371e+01  -9.4132599e+01  -9.7810349e+01
   2.3080104e+01  -2.4613620e+01   0.0000000e+00   7.8336565e+01  -1.2281146e+02  -8.8088932e+01
   2.2985914e+01  -2.4518468e+01   0.0000000e+00   8.1608561e+01  -1.1707475e+02   1.5182991e+01
   2.2873265e+01  -2.4441779e+01   0.0000000e+00   1.8343916e+01  -5.9678636e+01   6.1792012e+01
   2.2746461e+01  -2.4386462e+01   0.0000000e+00  -1.4607254e+01  -2.7010732e+01   2.7911305e+01
   2.2610323e+01  -2.4354616e+01   0.0000000e+00  -5.0055534e+00  -2.2491113e+01   5.5404722e+00
   2.2470010e+01  -2.4347446e+01   0.0000000e+00   6.0443605e+00  -2.8191631e+01  -2.1533875e+00
   2.2330831e+01  -2.4365223e+01   0.0000000e+00   1.2829691e+01  -4.9737297e+01   2.4063138e+01
   2.2198056e+01  -2.4407274e+01   0.0000000e+00   2.9254593e+01  -1.5106193e+01   7.5435660e+01
   2.2076722e+01  -2.4472006e+01   0.0000000e+00   5.4842854e+01   6.5202486e+01   4.3785975e+01
   2.1971451e+01  -2.4556965e+01   0.0000000e+00   6.4797824e+01   8.4142752e+01  -7.0714556e+01
   2.1886278e+01  -2.4658924e+01   0.0000000e+00   2.8270599e+01   3.2884773e+01  -1.5737944e+02
   2.1824496e+01  -2.4774000e+01   0.0000000e+00  -2.7826220e+01  -1.9008417e+01  -1.4621965e+02
   2.1788530e+01  -2.4897801e+01   0.0000000e+00  -3.9694003e+01  -2.4924875e+01  -8.2764880e+01
   2.1779836e+01  -2.5025590e+01   0.0000000e+00  -1.4659352e+01   6.1148094e+00  -3.4471392e+01
   2.1798831e+01  -2.5152461e+01   0.0000000e+00   2.5254142e+01   4.5929433e+01   2.2398109e-01
   2.2206112e+01  -2.5734817e+01   0.0000000e+00   4.5329429e+01   6.2545272e+00   5.0863636e+01
   2.2344390e+01  -2.5768576e+01   0.0000000e+00   5.1744595e+01  -2.0189095e+01   5.2867864e+01
   2.2486994e+01  -2.5781239e+01   0.0000000e+00   6.0911800e+01  -6.2123705e+01   3.6902551e+01
   2.2629959e+01  -2.5772455e+01   0.0000000e+00   5.5257777e+01  -8.5483225e+01   1.9437594e+00
   2.2769312e+01  -2.5742469e+01   0.0000000e+00   3.9461868e+01  -8.2419396e+01  -3.4508494e+01
   2.2901183e+01  -2.5692114e+01   0.0000000e+00   2.9068060e+01  -5.6352876e+01  -5.3950590e+01
   2.3021922e+01  -2.5622788e+01   0.0000000e+00  -1.9978505e+00  -9.7684333e+01  -2.4538275e+01
   2.3128207e+01  -2.5536414e+01   0.0000000e+00  -8.4110443e+01  -2.9555341e+02  -1.3265070e+02
   2.3217130e+01  -2.5435380e+01   0.0000000e+00   6.7631644e-01  -3.6245816e+02  -4.5738581e+02
   2.3286284e+01  -2.5322476e+01   0.0000000e+00   1.8205218e+02  -6.9087243e+01  -4.7502848e+02
   2.3333824e+01  -2.5200810e+01   0.0000000e+00   4.2248008e+01   2.0026701e+02  -2.6366419e+02
   2.3358512e+01  -2.5073722e+01   0.0000000e+00  -7.5030217e+01   1.8824414e+02  -3.3885642e+02
   2.3359744e+01  -2.4944688e+01   0.0000000e+00   1.0949726e+02   6.4139411e+01  -3.4806348e+02
   2.3337560e+01  -2.4817228e+01   0.0000000e+00   1.5090162e+02  -5.4549182e+00  -1.4353802e+02
   2.3292633e+01  -2.4694808e+01   0.0000000e+00   5.1072318e+01  -3.2687938e+01  -1.0247043e+02
   2.3226246e+01  -2.4580748e+01   0.0000000e+00   7.8129406e+01  -7.3407089e+01  -1.3452072e+02
   2.3140249e+01  -2.4478131e+01   0.0000000e+00   1.0777413e+02  -1.0057675e+02  -5.8571065e+01
   2.3037005e+01  -2.4389725e+01   0.0000000e+00   5.2804517e+01  -7.7977316e+01   1.4620917e+01
   2.2919326e+01  -2.4317909e+01   0.0000000e+00   8.8653836e-01  -3.5088512e+01   2.7436587e+00
   2.2790392e+01  -2.4264612e+01   0.0000000e+00  -3.9978971e+00  -2.8304813e+01  -3.1920564e+01
   2.2653675e+01  -2.4231265e+01   0.0000000e+00   4.0349328e+00  -3.2629239e+01  -2.5462891e+01
   2.2512842e+01  -2.4218760e+01   0.0000000e+00  -1.9755720e+00  -2.3913686e+01  -1.8144901e+01
   2.2371665e+01  -2.4227433e+01   0.0000000e+00  -1.2075822e+01  -4.2121615e+01  -6.7287454e+00
   2.2233924e+01  -2.4257052e+01   0.0000000e+00  -1.1070120e+01  -3.7937112e+01   5.2504917e+01
   2.2103315e+01  -2.4306822e+01   0.0000000e+00   8.3801505e+00   3.5955206e+01   7.0535653e+01
   2.1983349e+01  -2.4375409e+01   0.0000000e+00   3.6982989e+01   7.8661657e+01  -4.4615405e+00
   2.1877268e+01  -2.4460971e+01   0.0000000e+00   6.0130241e+01   3.6076149e+01  -8.5105707e+01
   2.1787954e+01  -2.4561206e+01   0.0000000e+00   5.4198010e+01  -3.2865028e+01  -1.2181785e+02
   2.1717858e+01  -2.4673412e+01   0.0000000e+00   8.2900931e+00  -8.2616072e+01  -1.0633067e+02
   2.1668928e+01  -2.4794557e+01   0.0000000e+00  -2.1119812e+01  -1.0131974e+02  -4.9014663e+01
   2.1642551e+01  -2.4921357e+01   0.0000000e+00  -1.9117897e-01  -9.0267426e+01  -1.6440604e+01
   2.1639516e+01  -2.5050367e+01   0.0000000e+00   3.0054658e+01  -6.0489191e+01  -2.6839607e+01
   2.1659977e+01  -2.5178069e+01   0.0000000e+00   6.6801364e+01  -1.9563022e+01  -4.3986614e+01
   2.1703447e+01  -2.5300971e+01   0.0000000e+00   1.1569458e+02   3.1162319e+01  -8.3016060e+01
   2.1768802e+01  -2.5415702e+01   0.0000000e+00   1.2130268e+02   9.9677106e+01  -1.3315575e+02
   2.1854304e+01  -2.5519106e+01   0.0000000e+00   6.8270550e+01   1.6506604e+02  -9.7454045e+01
   2.1957642e+01  -2.5608328e+01   0.0000000e+00   2.9987281e+01   1.4271150e+02   1.9977237e+01
   2.2075997e+01  -2.5680903e+01   0.0000000e+00   3.6755486e+01   5.0843483e+01   6.8363507e+01
   2.2817160e+01  -2.5862456e+01   0.0000000e+00   1.0312253e+02  -8.7365991e+01  -5.1173262e+01
   2.2950195e+01  -2.5812714e+01   0.0000000e+00   7.9843331e+01  -4.2042968e+01  -6.2615253e+01
   2.3073880e+01  -2.5746332e+01   0.0000000e+00   1.0390196e+00  -2.4328703e+01  -5.1896317e+01
   2.3185665e+01  -2.5664687e+01   0.0000000e+00  -1.8276442e+02  -1.2212300e+02  -1.2776887e+02
   2.3283263e+01  -2.5569471e+01   0.0000000e+00  -3.0720265e+02  -2.1308282e+02  -5.6266855e+02
   2.3364693e+01  -2.5462651e+01   0.0000000e+00   1.3250807e+01   2.8117349e+01  -9.3399452e+02
   2.3428322e+01  -2.5346430e+01   0.0000000e+00   3.4185855e+02   3.7824369e+02  -5.0908793e+02
   2.3472896e+01  -2.5223196e+01   0.0000000e+00   7.5888136e+01   4.1511399e+02   5.8750875e+01
   2.3497562e+01  -2.5095476e+01   0.0000000e+00  -2.1499784e+02   2.6716740e+02  -2.8124261e+01
   2.3501877e+01  -2.4965878e+01   0.0000000e+00  -4.5246052e+01   1.3630029e+02  -2.3251967e+02
   2.3485818e+01  -2.4837042e+01   0.0000000e+00   1.0443139e+02   4.0297006e+01  -1.1836698e+02
   2.3449774e+01  -2.4711583e+01   0.0000000e+00   2.2616849e+01  -1.6013096e+01  -5.9734043e+01
   2.3394533e+01  -2.4592042e+01   0.0000000e+00   3.2016796e+01  -5.5108546e+01  -1.3416849e+02
   2.3321262e+01  -2.4480829e+01   0.0000000e+00   1.1634746e+02  -7.2250652e+01  -1.0043936e+02
   2.3231482e+01  -2.4380185e+01   0.0000000e+00   1.0501736e+02  -6.6127729e+01  -2.0030153e+01
   2.3127031e+01  -2.4292130e+01   0.0000000e+00   5.5922584e+01  -4.9471598e+01   8.2935597e+00
   2.3010031e+01  -2.4218429e+01   0.0000000e+00   3.0964262e+01  -2.0607648e+01  -6.0369350e+00
   2.2882839e+01  -2.4160555e+01   0.0000000e+00   3.1600433e+01  -1.3769924e+01  -3.7409737e+01
   2.2748007e+01  -2.4119665e+01   0.0000000e+00   3.6111611e+01  -2.4340443e+01  -4.1721133e+01
   2.2608231e+01  -2.4096575e+01   0.0000000e+00   2.4061141e+01  -1.2878526e+01  -3.7809524e+01
   2.2466298e+01  -2.4091744e+01   0.0000000e+00   3.6047611e+00  -9.2529238e+00  -5.7874600e+01
   2.2325037e+01  -2.4105269e+01   0.0000000e+00  -1.7465529e+01  -3.6768013e+01  -4.3721570e+01
   2.2187263e+01  -2.4136881e+01   0.0000000e+00  -2.9912004e+01  -2.0166280e+01   1.6730819e+01
   2.2055726e+01  -2.4185949e+01   0.0000000e+00  -1.3154326e+01   4.1858545e+01   1.8324642e+01
   2.1933060e+01  -2.4251493e+01   0.0000000e+00   1.9477543e+01   5.0513446e+01  -4.6291710e+01
   2.1821731e+01  -2.4332204e+01   0.0000000e+00   3.8252537e+01  -2.9751360e-01  -7.4936928e+01
   2.1723990e+01  -2.4426466e+01   0.0000000e+00   4.7031252e+01  -3.8809324e+01  -5.4465795e+01
   2.1641829e+01  -2.4532388e+01   0.0000000e+00   3.2922105e+01  -4.6592606e+01  -4.1043388e+01
   2.1576941e+01  -2.4647842e+01   0.0000000e+00  -1.5636301e+01  -5.0200135e+01  -1.7938046e+01
   2.1530681e+01  -2.4770499e+01   0.0000000e+00  -4.0018699e+01  -6.1004657e+01   3.9399866e+01
   2.1504041e+01  -2.4897882e+01   0.0000000e+00  -6.2975527e+00  -7.6156323e+01   7.1346058e+01
   2.1497622e+01  -2.5027408e+01   0.0000000e+00   3.4708289e+01  -9.3341818e+01   4.9337796e+01
   2.1511616e+01  -2.5156444e+01   0.0000000e+00   7.2002981e+01  -1.0055624e+02   9.3215080e+00
   2.1545804e+01  -2.5282358e+01   0.0000000e+00   1.1821873e+02  -8.4670116e+01  -5.5878691e+01
   2.1599547e+01  -2.5402574e+01   0.0000000e+00   1.3560048e+02  -4.9307479e+01  -1.5196570e+02
   2.1671799e+01  -2.5514624e+01   0.0000000e+00   1.0093831e+02   2.2642044e+01  -2.2656042e+02
   2.1761122e+01  -2.5616202e+01   0.0000000e+00   4.3757434e+01   1.3587300e+02  -1.9164342e+02
   2.1865716e+01  -2.5705211e+01   0.0000000e+00   1.5211470e+01   1.8377861e+02  -4.1687989e+01
   2.1983447e+01  -2.5779810e+01   0.0000000e+00   2.8989610e+01   9.9314130e+01   6.0833230e+01
   2.2111897e+01  -2.5838451e+01   0.0000000e+00   4.7489104e+01   1.9784214e+01   4.3782429e+01
   2.2248414e+01  -2.5879917e+01   0.0000000e+00   5.6013074e+01  -5.0592103e+00   3.0271515e+01
   2.2390166e+01  -2.5903346e+01   0.0000000e+00   6.9830020e+01  -4.2731641e+01   2.5726065e+01
   2.2534204e+01  -2.5908248e+01   0.0000000e+00   7.4083931e+01  -7.0958644e+01   3.7461246e+00
   2.2677529e+01  -2.5894523e+01   0.0000000e+00   8.3390292e+01  -9.4717134e+01  -2.0115253e+01
   2.3395327e+01  -2.5648315e+01   0.0000000e+00  -4.8068258e+02   1.5314782e+02  -3.9769737e+02
   2.3476438e+01  -2.5543687e+01   0.0000000e+00  -2.6113940e+02   4.7408542e+02  -7.5480810e+02
   2.3542550e+01  -2.5430832e+01   0.0000000e+00   1.7286098e+02   7.1311949e+02  -4.2736567e+02
   2.3592694e+01  -2.5311479e+01   0.0000000e+00   1.3162358e+02   5.0352537e+02   2.2028239e+02
   2.3626151e+01  -2.5187454e+01   0.0000000e+00  -2.3242487e+02   1.5789532e+02   3.2483169e+02
   2.3642464e+01  -2.5060648e+01   0.0000000e+00  -2.9207238e+02   2.3437544e+01  -5.0095479e+00
   2.3641438e+01  -2.4932989e+01   0.0000000e+00  -6.1524656e+01  -7.3114234e+00  -1.5241228e+02
   2.3623142e+01  -2.4806410e+01   0.0000000e+00   3.1220918e+01  -4.1644749e+01  -6.4931378e+01
   2.3587905e+01  -2.4682823e+01   0.0000000e+00  -3.4811027e+01  -5.2096141e+01  -8.8952461e+01
   2.3536306e+01  -2.4564089e+01   0.0000000e+00   1.7767938e+01  -6.9279590e+01  -1.9207313e+02
   2.3469165e+01  -2.4451993e+01   0.0000000e+00   1.2660727e+02  -8.5893158e+01  -1.3134813e+02
   2.3387527e+01  -2.4348212e+01   0.0000000e+00   1.0923515e+02  -6.8602740e+01  -1.7069039e+01
   2.3292645e+01  -2.4254297e+01   0.0000000e+00   5.2799340e+01  -5.7912214e+01   7.4598346e+00
   2.3185961e+01  -2.4171648e+01   0.0000000e+00   3.7058323e+01  -5.0612435e+01   1.1317579e+01
   2.3069082e+01  -2.4101496e+01   0.0000000e+00   3.3146707e+01  -2.6154997e+01   6.9273136e+00
   2.2943759e+01  -2.4044881e+01   0.0000000e+00   4.2995528e+01  -1.7637863e+01  -1.5755550e+01
   2.2811860e+01  -2.4002644e+01   0.0000000e+00   6.0698955e+01  -2.1473210e+01  -2.2917331e+01
   2.2675344e+01  -2.3975411e+01   0.0000000e+00   6.8292297e+01  -7.5672210e+00  -2.5796523e+01
   2.2536233e+01  -2.3963584e+01   0.0000000e+00   6.6579477e+01   1.0133495e+01  -5.4546989e+01
   2.2396586e+01  -2.3967339e+01   0.0000000e+00   5.3170022e+01  -4.7590517e+00  -8.2446199e+01
   2.2258470e+01  -2.3986621e+01   0.0000000e+00   1.9815693e+01  -1.8796260e+01  -6.3608469e+01
   2.2123927e+01  -2.4021143e+01   0.0000000e+00  -1.6331603e+01   6.8198497e+00  -4.0246840e+01
   2.1994955e+01  -2.4070395e+01   0.0000000e+00  -1.1755106e+01   1.8652489e+01  -5.2918290e+01
   2.1873472e+01  -2.4133646e+01   0.0000000e+00   2.7868189e+01  -8.0484535e+00  -6.8890937e+01
   2.1761292e+01  -2.4209958e+01   0.0000000e+00   4.5921936e+01  -3.2181310e+01  -5.9339706e+01
   2.1660100e+01  -2.4298196e+01   0.0000000e+00   3.8021448e+01  -2.8089792e+01  -3.0181369e+01
   2.1571427e+01  -2.4397046e+01   0.0000000e+00   3.6223014e+01  -3.3652995e+00  -1.8963736e+01
   2.1496626e+01  -2.4505033e+01   0.0000000e+00   1.8159635e+01   2.0389753e+01  -4.0591568e+01
   2.1436852e+01  -2.4620542e+01   0.0000000e+00  -3.9013970e+01   2.8033729e+01  -3.9606108e+01
   2.1393044e+01  -2.4741841e+01   0.0000000e+00  -7.8200799e+01   1.9019187e+01   2.2426942e+01
   2.1365907e+01  -2.4867105e+01   0.0000000e+00  -5.3183923e+01  -3.5494396e+00   8.5342910e+01
   2.1355902e+01  -2.4994445e+01   0.0000000e+00  -9.8386052e+00  -4.2427236e+01   1.0349105e+02
   2.1363232e+01  -2.5121935e+01   0.0000000e+00   3.5997616e+01  -9.0134116e+01   1.0268934e+02
   2.1387842e+01  -2.5247641e+01   0.0000000e+00   1.0157775e+02  -1.1987007e+02   6.0212081e+01
   2.1429408e+01  -2.5369649e+01   0.0000000e+00   1.3701192e+02  -1.2058625e+02  -3.5452430e+01
   2.1487346e+01  -2.5486095e+01   0.0000000e+00   1.1972898e+02  -1.0673738e+02  -1.2852354e+02
   2.1560817e+01  -2.5595198e+01   0.0000000e+00   8.9475162e+01  -6.8028982e+01  -1.9766212e+02
   2.1648732e+01  -2.5695281e+01   0.0000000e+00   7.0716221e+01   4.0638625e+01  -2.3420530e+02
   2.1749773e+01  -2.5784802e+01   0.0000000e+00   4.7686593e+01   1.8357615e+02  -1.6912019e+02
   2.1862409e+01  -2.5862380e+01   0.0000000e+00   2.7045826e+01   1.9620302e+02  -1.5409608e+01
   2.1984918e+01  -2.5926814e+01   0.0000000e+00   3.1468552e+01   7.7397509e+01   4.8858906e+01
   2.2115417e+01  -2.5977106e+01   0.0000000e+00   3.8257651e+01   7.4220573e+00   1.5861627e+01
   2.2251889e+01  -2.6012474e+01   0.0000000e+00   4.9170895e+01  -2.4917177e+01   2.9396416e+00
   2.2392219e+01  -2.6032368e+01   0.0000000e+00   7.6192971e+01  -5.9849415e+01  -2.2681632e+01
   2.2534225e+01  -2.6036480e+01   0.0000000e+00   8.5690462e+01  -7.1573333e+01  -3.9683288e+01
   2.2675699e+01  -2.6024745e+01   0.0000000e+00   9.1387190e+01  -1.2758510e+02  -7.4220173e+01
   2.2814440e+01  -2.5997346e+01   0.0000000e+00   1.4277816e+02  -1.4271017e+02  -1.8376428e+02
   2.2948295e+01  -2.5954709e+01   0.0000000e+00   1.8175054e+02  -4.2822478e+01  -2.1409636e+02
   2.3075191e+01  -2.5897496e+01   0.0000000e+00   1.2260688e+02   5.6847868e+01  -1.3744835e+02
   2.3193172e+01  -2.5826595e+01   0.0000000e+00  -1.2548225e+01   1.0368813e+02  -5.0863243e+01
   2.3300428e+01  -2.5743104e+01   0.0000000e+00  -2.5795174e+02   9.0305790e+01  -5.6623935e+01
   2.3766996e+01  -2.5206421e+01   0.0000000e+00  -3.9432223e+02  -9.2376918e+01   1.7461781e+02
   2.3783719e+01  -2.5078890e+01   0.0000000e+00  -3.1008905e+02  -1.4630747e+02  -1.4498335e+02
   2.3784834e+01  -2.4950467e+01   0.0000000e+00  -1.0941263e+02  -1.2571304e+02  -2.4302096e+02
   2.3770378e+01  -2.4822711e+01   0.0000000e+00   1.0445437e+01  -1.3719431e+02  -1.7074373e+02
   2.3740574e+01  -2.4697168e+01   0.0000000e+00  -3.1928482e+00  -9.4474763e+01  -1.3194918e+02
   2.3695825e+01  -2.4575353e+01   0.0000000e+00   1.9449663e+01  -3.1092570e+01  -2.0945652e+02
   2.3636712e+01  -2.4458730e+01   0.0000000e+00   1.2913235e+02  -3.2932886e+01  -2.0357393e+02
   2.3563983e+01  -2.4348698e+01   0.0000000e+00   1.4088222e+02  -5.3540657e+01  -7.1403958e+01
   2.3478542e+01  -2.4246574e+01   0.0000000e+00   5.2879478e+01  -5.1568667e+01  -1.4951198e+01
   2.3381437e+01  -2.4153577e+01   0.0000000e+00   1.9129704e+01  -6.3976870e+01  -3.6411889e+01
   2.3273847e+01  -2.4070813e+01   0.0000000e+00   2.6580060e+01  -6.9513666e+01  -2.1720304e+01
   2.3157070e+01  -2.3999268e+01   0.0000000e+00   2.3180269e+01  -4.8725618e+01  -5.6025365e+00
   2.3032504e+01  -2.3939789e+01   0.0000000e+00   3.3193427e+01  -3.9424536e+01  -1.1597344e+01
   2.2901635e+01  -2.3893081e+01   0.0000000e+00   5.7527389e+01  -4.3327166e+01  -2.8911633e+00
   2.2766016e+01  -2.3859698e+01   0.0000000e+00   8.1001633e+01  -3.3526103e+01   1.5015241e+01
   2.2627254e+01  -2.3840034e+01   0.0000000e+00   1.0277971e+02  -6.2904980e+00   1.5532164e+01
   2.2486990e+01  -2.3834322e+01   0.0000000e+00   1.1407621e+02   1.1961622e+01  -1.2065987e+01
   2.2346878e+01  -2.3842629e+01   0.0000000e+00   1.0593848e+02   6.0542645e+00  -3.4336212e+01
   2.2208576e+01  -2.3864856e+01   0.0000000e+00   7.2711216e+01   2.1702920e+01  -4.9744458e+01
   2.2073717e+01  -2.3900742e+01   0.0000000e+00   2.2989940e+01   2.8725402e+01  -9.8629942e+01
   2.1943900e+01  -2.3949862e+01   0.0000000e+00   3.8958921e+00  -2.7637540e+01  -1.1415951e+02
   2.1820668e+01  -2.4011634e+01   0.0000000e+00   3.5912273e+01  -6.9132967e+01  -5.9949795e+01
   2.1705490e+01  -2.4085325e+01   0.0000000e+00   6.6218175e+01  -4.3121164e+01  -2.5279535e+01
   2.1599747e+01  -2.4170063e+01   0.0000000e+00   5.4245388e+01  -6.8498156e+00  -3.7883506e+01
   2.1504717e+01  -2.4264838e+01   0.0000000e+00   3.8940950e+01   6.5125427e+00  -4.7248230e+01
   2.1421556e+01  -2.4368522e+01   0.0000000e+00   4.9092211e+01   1.9504092e+01  -6.0444007e+01
   2.1351286e+01  -2.4479876e+01   0.0000000e+00   3.6320392e+01   3.8641281e+01  -9.8768720e+01
   2.1294783e+01  -2.4597569e+01   0.0000000e+00  -3.2011671e+01   5.1502354e+01  -1.1025614e+02
   2.1252763e+01  -2.4720187e+01   0.0000000e+00  -9.4570160e+01   5.3552790e+01  -4.7736690e+01
   2.1225776e+01  -2.4846255e+01   0.0000000e+00  -9.1359725e+01   4.2069048e+01   3.3799632e+01
   2.1214194e+01  -2.4974252e+01   0.0000000e+00  -6.1509151e+01   1.1679451e+01   8.5114849e+01
   2.1218203e+01  -2.5102628e+01   0.0000000e+00  -1.8553077e+01  -3.3010799e+01   1.3520687e+02
   2.1237805e+01  -2.5229823e+01   0.0000000e+00   6.9571408e+01  -7.6684045e+01   1.4293785e+02
   2.1272810e+01  -2.5354289e+01   0.0000000e+00   1.3743820e+02  -1.0402490e+02   5.8356543e+01
   2.1322835e+01  -2.5474505e+01   0.0000000e+00   1.3320916e+02  -1.1037997e+02  -4.2143590e+01
   2.1387313e+01  -2.5588997e+01   0.0000000e+00   1.0443992e+02  -1.0402347e+02  -9.7189714e+01
   2.1465492e+01  -2.5696358e+01   0.0000000e+00   1.0093340e+02  -9.7432853e+01  -1.4597630e+02
   2.1556443e+01  -2.5795263e+01   0.0000000e+00   1.1654446e+02  -3.6911420e+01  -2.5057188e+02
   2.1659074e+01  -2.5884489e+01   0.0000000e+00   8.1318546e+01   1.3489220e+02  -3.0435814e+02
   2.1772138e+01  -2.5962932e+01   0.0000000e+00   1.2964130e+01   2.4784428e+02  -1.5356117e+02
   2.1894251e+01  -2.6029616e+01   0.0000000e+00   2.5989308e-01   1.5127949e+02   1.7605987e+01
   2.2023907e+01  -2.6083711e+01   0.0000000e+00   1.4096293e+01   3.0386506e+01   2.5249399e+01
   2.2159501e+01  -2.6124543e+01   0.0000000e+00   1.1516451e+01  -1.5084921e+01   5.1217510e+00
   2.2299346e+01  -2.6151603e+01   0.0000000e+00   2.8297128e+01  -7.7609778e+01  -2.6755024e+01
   2.2441699e+01  -2.6164552e+01   0.0000000e+00   6.0961775e+01  -8.3396083e+01  -9.9817331e+01
   2.2584779e+01  -2.6163228e+01   0.0000000e+00   5.9544598e+01  -6.8650492e+01  -9.8164458e+01
   2.2726800e+01  -2.6147648e+01   0.0000000e+00   2.0930680e+01  -1.4465394e+02  -1.5283421e+02
   2.2865988e+01  -2.6118006e+01   0.0000000e+00   2.3637569e+01  -1.4314872e+02  -3.4286835e+02
   2.3000608e+01  -2.6074673e+01   0.0000000e+00   1.0993128e+02   1.1361363e+01  -4.0783773e+02
   2.3128985e+01  -2.6018190e+01   0.0000000e+00   1.4905363e+02   1.6332467e+02  -2.4983335e+02
   2.3249532e+01  -2.5949261e+01   0.0000000e+00   7.0687780e+01   2.2376316e+02  -5.1875468e+01
   2.3360764e+01  -2.5868743e+01   0.0000000e+00  -5.6317281e+01   2.1868826e+02   9.7947271e+01
   2.3461321e+01  -2.5777637e+01   0.0000000e+00  -2.4246422e+02   2.2779844e+02   1.1848995e+02
   2.3549984e+01  -2.5677070e+01   0.0000000e+00  -3.1870344e+02   4.2032855e+02  -4.0701915e+01
   2.3625690e+01  -2.5568286e+01   0.0000000e+00  -1.2088216e+02   6.9902641e+02  -1.7774283e+01
   2.3687542e+01  -2.5452625e+01   0.0000000e+00  -3.3862205e-01   6.4887945e+02   3.1844793e+02
   2.3734822e+01  -2.5331509e+01   0.0000000e+00  -2.0775925e+02   2.4089967e+02   4.5617106e+02
   2.3875586e+01  -2.4659982e+01   0.0000000e+00   8.1455999e+01  -9.3564444e+01  -2.2267875e+02
   2.3830879e+01  -2.4537575e+01   0.0000000e+00   1.1016363e+02  -7.2294039e+00  -1.7839912e+02
   2.3773097e+01  -2.4419804e+01   0.0000000e+00   1.5855054e+02   2.4352359e+01  -1.2576910e+02
   2.3702841e+01  -2.4307823e+01   0.0000000e+00   1.2752950e+02   2.5142984e+00  -3.9536752e+01
   2.3620832e+01  -2.4202727e+01   0.0000000e+00   3.8056962e+01  -1.5749598e+01  -2.8673126e+01
   2.3527895e+01  -2.4105543e+01   0.0000000e+00   1.9852183e+01  -3.5575658e+01  -7.9705441e+01
   2.3424960e+01  -2.4017218e+01   0.0000000e+00   4.9320122e+01  -5.4756786e+01  -7.5974652e+01
   2.3313046e+01  -2.3938609e+01   0.0000000e+00   4.4414858e+01  -5.1585489e+01  -4.0122470e+01
   2.3193253e+01  -2.3870480e+01   0.0000000e+00   3.0495341e+01  -4.5017324e+01  -2.8247641e+01
   2.3066752e+01  -2.3813490e+01   0.0000000e+00   3.4171369e+01  -5.4065038e+01  -2.1860019e+01
   2.2934774e+01  -2.3768190e+01   0.0000000e+00   4.6018447e+01  -6.6298190e+01   2.4169117e-01
   2.2798599e+01  -2.3735020e+01   0.0000000e+00   6.4625042e+01  -6.4843690e+01   3.3318115e+01
   2.2659544e+01  -2.3714297e+01   0.0000000e+00   8.9493668e+01  -3.8146934e+01   6.5925381e+01
   2.2518950e+01  -2.3706224e+01   0.0000000e+00   1.0505982e+02   2.2039489e+00   6.3265777e+01
   2.2378173e+01  -2.3710877e+01   0.0000000e+00   1.0835292e+02   1.2841829e+01   4.0046596e+01
   2.2238571e+01  -2.3728212e+01   0.0000000e+00   1.0719730e+02   3.6557241e+01   2.2778229e+01
   2.2101491e+01  -2.3758062e+01   0.0000000e+00   8.6878892e+01   6.4497869e+01  -6.2306125e+01
   2.1968257e+01  -2.3800137e+01   0.0000000e+00   5.2612983e+01  -1.3342667e+01  -1.4969317e+02
   2.1840160e+01  -2.3854033e+01   0.0000000e+00   4.5287719e+01  -1.1507930e+02  -1.0122513e+02
   2.1718445e+01  -2.3919227e+01   0.0000000e+00   7.6246250e+01  -1.0163460e+02  -6.8722430e+00
   2.1604300e+01  -2.3995088e+01   0.0000000e+00   1.0399775e+02  -2.7468202e+01  -1.2152337e+01
   2.1498847e+01  -2.4080881e+01   0.0000000e+00   8.8574276e+01  -6.2795980e+00  -7.5780057e+01
   2.1403126e+01  -2.4175771e+01   0.0000000e+00   6.4711948e+01  -2.9099124e+01  -8.7471068e+01
   2.1318092e+01  -2.4278837e+01   0.0000000e+00   7.8750328e+01  -2.6508075e+01  -6.9287961e+01
   2.1244599e+01  -2.4389071e+01   0.0000000e+00   9.5114608e+01   5.5742695e+00  -9.7681704e+01
   2.1183398e+01  -2.4505397e+01   0.0000000e+00   5.2528316e+01   3.4594099e+01  -1.5428821e+02
   2.1135123e+01  -2.4626673e+01   0.0000000e+00  -4.0470211e+01   5.2755704e+01  -1.5667869e+02
   2.1100284e+01  -2.4751708e+01   0.0000000e+00  -1.0554186e+02   6.0251867e+01  -8.3512213e+01
   2.1079268e+01  -2.4879269e+01   0.0000000e+00  -1.0837694e+02   4.8427485e+01   2.1387493e-01
   2.1072323e+01  -2.5008094e+01   0.0000000e+00  -8.7085333e+01   2.4343188e+01   7.1366217e+01
   2.1079564e+01  -2.5136907e+01   0.0000000e+00  -2.9837653e+01   1.4543961e+00   1.4344467e+02
   2.1100962e+01  -2.5264425e+01   0.0000000e+00   7.0193896e+01  -2.7401441e+01   1.4896194e+02
   2.1136349e+01  -2.5389375e+01   0.0000000e+00   1.2490646e+02  -6.9107555e+01   6.8059006e+01
   2.1185413e+01  -2.5510507e+01   0.0000000e+00   1.2045064e+02  -1.0660777e+02  -1.4385067e+01
   2.1247702e+01  -2.5626604e+01   0.0000000e+00   1.1017285e+02  -1.0657060e+02  -7.0214391e+01
   2.1322627e+01  -2.5736496e+01   0.0000000e+00   1.0180311e+02  -9.3278197e+01  -9.8968641e+01
   2.1409465e+01  -2.5839073e+01   0.0000000e+00   1.1726743e+02  -1.1659784e+02  -1.6438698e+02
   2.1507366e+01  -2.5933295e+01   0.0000000e+00   1.0584375e+02  -7.1393568e+01  -3.3322110e+02
   2.1615363e+01  -2.6018206e+01   0.0000000e+00   8.2979250e+00   1.2239959e+02  -3.9176872e+02
   2.1732377e+01  -2.6092940e+01   0.0000000e+00  -6.0240663e+01   2.4226999e+02  -1.8662562e+02
   2.1857230e+01  -2.6156734e+01   0.0000000e+00  -2.9649191e+01   1.4496679e+02   5.8426249e+00
   2.1988659e+01  -2.6208937e+01   0.0000000e+00   1.1982256e+00   3.7449172e+01   1.6669830e+01
   2.2125326e+01  -2.6249014e+01   0.0000000e+00  -7.5843783e+00   3.6064677e-01   1.9526151e+01
   2.2265835e+01  -2.6276554e+01   0.0000000e+00  -1.2335492e+01  -8.6598906e+01   5.5203803e+00
   2.2408747e+01  -2.6291274e+01   0.0000000e+00   3.1801777e-01  -1.2148426e+02  -1.0895748e+02
   2.2552596e+01  -2.6293022e+01   0.0000000e+00   2.3834998e+01  -5.8243816e+01  -1.4579604e+02
   2.2695905e+01  -2.6281782e+01   0.0000000e+00   5.9786451e+00  -5.5403142e+01  -1.1000426e+02
   2.2837204e+01  -2.6257668e+01   0.0000000e+00  -1.0258376e+02  -8.0671444e+01  -1.7685290e+02
   2.2975043e+01  -2.6220927e+01   0.0000000e+00  -1.5175638e+02  -4.9673666e+01  -3.3517975e+02
   2.3108015e+01  -2.6171938e+01   0.0000000e+00   5.4088904e+00   8.1798724e+01  -4.1097815e+02
   2.3234764e+01  -2.6111201e+01   0.0000000e+00   1.4979633e+02   2.4624642e+02  -2.2945671e+02
   2.3354006e+01  -2.6039339e+01   0.0000000e+00   1.0502464e+02   2.6832881e+02   3.3937845e+01
   2.3464538e+01  -2.5957085e+01   0.0000000e+00   2.5279946e+01   1.7876232e+02   1.6705514e+02
   2.3565255e+01  -2.5865276e+01   0.0000000e+00  -1.4690361e+01   1.1372502e+02   2.0349705e+02
   2.3655157e+01  -2.5764847e+01   0.0000000e+00   3.6693635e+00   1.7303307e+02   2.1373826e+02
   2.3733362e+01  -2.5656816e+01   0.0000000e+00   1.1124246e+02   3.0745246e+02   3.5379078e+02
   2.3799113e+01  -2.5542275e+01   0.0000000e+00   8.7697365e+01   3.2943387e+02   6.2919435e+02
   2.3851784e+01  -2.5422380e+01   0.0000000e+00  -2.4717716e+02   1.7692735e+02   6.6572418e+02
   2.3890885e+01  -2.5298334e+01   0.0000000e+00  -5.3989114e+02  -2.6188867e+01   2.4293122e+02
   2.3916068e+01  -2.5171383e+01   0.0000000e+00  -4.4037158e+02  -1.0505316e+02  -2.1094202e+02
   2.3927125e+01  -2.5042792e+01   0.0000000e+00  -2.2765781e+02  -7.4823789e+01  -3.5530885e+02
   2.3923990e+01  -2.4913844e+01   0.0000000e+00  -9.2981434e+01  -9.5957369e+01  -3.7763649e+02
   2.3906739e+01  -2.4785818e+01   0.0000000e+00   3.2062099e+01  -1.3806202e+02  -3.2481787e+02
   2.3728573e+01  -2.4121189e+01   0.0000000e+00   5.9045453e+00  -1.3159541e+00  -5.4262110e+01
   2.3635549e+01  -2.4023575e+01   0.0000000e+00   4.8338804e+01  -2.3447705e+01  -9.6118556e+01
   2.3533333e+01  -2.3934023e+01   0.0000000e+00   8.8349292e+01  -3.0291216e+01  -5.8196272e+01
   2.3422770e+01  -2.3853255e+01   0.0000000e+00   6.6282199e+01  -1.9620708e+01  -2.4690371e+01
   2.3304766e+01  -2.3781924e+01   0.0000000e+00   3.6204175e+01  -2.4495358e+01  -2.8678066e+01
   2.3180283e+01  -2.3720604e+01   0.0000000e+00   2.8538829e+01  -4.3344272e+01  -3.6873479e+01
   2.3050332e+01  -2.3669791e+01   0.0000000e+00   3.8579245e+01  -6.6044588e+01  -3.2723104e+01
   2.2915960e+01  -2.3629891e+01   0.0000000e+00   5.5189176e+01  -8.1485008e+01  -6.2761589e+00
   2.2778251e+01  -2.3601225e+01   0.0000000e+00   6.7898594e+01  -8.2481233e+01   4.3019185e+01
   2.2638311e+01  -2.3584025e+01   0.0000000e+00   7.5449136e+01  -4.7276106e+01   9.4437922e+01
   2.2497262e+01  -2.3578427e+01   0.0000000e+00   7.7789026e+01   3.2911281e+00   9.1450281e+01
   2.2356235e+01  -2.3584476e+01   0.0000000e+00   7.8442706e+01   1.2790796e+01   7.3438921e+01
   2.2216360e+01  -2.3602125e+01   0.0000000e+00   8.3111437e+01   4.8334559e+01   7.2165486e+01
   2.2078760e+01  -2.3631230e+01   0.0000000e+00   8.0127712e+01   8.3061917e+01  -2.3330671e+01
   2.1944540e+01  -2.3671560e+01   0.0000000e+00   6.7788342e+01  -2.5029641e+01  -1.2492831e+02
   2.1814781e+01  -2.3722789e+01   0.0000000e+00   7.2192521e+01  -1.5620695e+02  -6.6837570e+01
   2.1690531e+01  -2.3784506e+01   0.0000000e+00   1.0157684e+02  -1.5004279e+02   4.4561984e+01
   2.1572798e+01  -2.3856215e+01   0.0000000e+00   1.4405069e+02  -7.1811348e+01   5.7262195e+01
   2.1462542e+01  -2.3937336e+01   0.0000000e+00   1.6012198e+02  -4.0971473e+01  -1.8285294e+01
   2.1360668e+01  -2.4027215e+01   0.0000000e+00   1.2999931e+02  -7.4433448e+01  -6.4939258e+01
   2.1268016e+01  -2.4125126e+01   0.0000000e+00   1.0940754e+02  -9.5772960e+01  -3.8167283e+01
   2.1185358e+01  -2.4230273e+01   0.0000000e+00   1.3187208e+02  -6.5871217e+01  -2.4263827e+01
   2.1113392e+01  -2.4341804e+01   0.0000000e+00   1.5134826e+02  -2.4442380e+01  -8.1010775e+01
   2.1052731e+01  -2.4458811e+01   0.0000000e+00   1.1789638e+02  -8.4816563e-02  -1.6780012e+02
   2.1003903e+01  -2.4580337e+01   0.0000000e+00   2.6352483e+01   2.0376553e+01  -2.1405696e+02
   2.0967340e+01  -2.4705388e+01   0.0000000e+00  -7.4885535e+01   4.1607977e+01  -1.7703529e+02
   2.0943381e+01  -2.4832937e+01   0.0000000e+00  -1.2306531e+02   4.6344045e+01  -8.2150708e+01
   2.0932261e+01  -2.4961935e+01   0.0000000e+00  -1.1381465e+02   3.6575455e+01   1.3939303e+01
   2.0934113e+01  -2.5091316e+01   0.0000000e+00  -6.6254985e+01   3.2353903e+01   9.1756809e+01
   2.0948962e+01  -2.5220008e+01   0.0000000e+00   1.8471794e+01   2.5301461e+01   1.2225732e+02
   2.0976725e+01  -2.5346941e+01   0.0000000e+00   7.8205728e+01  -5.7293679e+00   8.0570161e+01
   2.1017212e+01  -2.5471057e+01   0.0000000e+00   7.4652422e+01  -6.4149908e+01   4.3182224e+01
   2.1070124e+01  -2.5591318e+01   0.0000000e+00   9.3447135e+01  -1.2311350e+02   2.3375290e+01
   2.1135052e+01  -2.5706714e+01   0.0000000e+00   1.2463661e+02  -1.2346392e+02  -5.0601422e+01
   2.1211486e+01  -2.5816275e+01   0.0000000e+00   1.0480066e+02  -8.4798169e+01  -1.0615896e+02
   2.1298812e+01  -2.5919076e+01   0.0000000e+00   9.3038856e+01  -1.0558722e+02  -1.3245404e+02
   2.1396318e+01  -2.6014246e+01   0.0000000e+00   7.0134639e+01  -1.3569993e+02  -2.6063144e+02
   2.1503202e+01  -2.6100978e+01   0.0000000e+00  -3.6415478e+01  -2.2295162e+01  -3.8583662e+02
   2.1618575e+01  -2.6178534e+01   0.0000000e+00  -1.2385322e+02   1.5182248e+02  -2.8593943e+02
   2.1741470e+01  -2.6246251e+01   0.0000000e+00  -9.1770264e+01   1.6923781e+02  -7.5347107e+01
   2.1870849e+01  -2.6303553e+01   0.0000000e+00  -2.8488867e+01   6.9650270e+01   2.5413577e+00
   2.2005615e+01  -2.6349947e+01   0.0000000e+00  -8.2639988e+00   2.7739259e+01  -6.2770981e+00
   2.2144619e+01  -2.6385037e+01   0.0000000e+00  -7.0201051e+00   2.3705073e+00   3.2880339e+01
   2.2286673e+01  -2.6408521e+01   0.0000000e+00  -2.3562986e+01  -9.0693666e+01   2.3699381e+01
   2.2430558e+01  -2.6420198e+01   0.0000000e+00  -4.1781536e+01  -1.3185552e+02  -8.0471830e+01
   2.2575040e+01  -2.6419967e+01   0.0000000e+00   4.8346304e+00  -9.7805788e+01  -1.5073372e+02
   2.2718877e+01  -2.6407830e+01   0.0000000e+00   7.1546953e+01  -2.9460242e+01  -1.6474923e+02
   2.2860835e+01  -2.6383891e+01   0.0000000e+00  -6.1286495e+00   5.6918480e+01  -8.1386764e+01
   2.2999697e+01  -2.6348357e+01   0.0000000e+00  -1.8661062e+02  -1.1079028e+01  -5.3997914e+01
   2.3134275e+01  -2.6301531e+01   0.0000000e+00  -1.6072112e+02  -5.4328856e+01  -3.0174679e+02
   2.3263423e+01  -2.6243816e+01   0.0000000e+00   7.6466361e+01   1.6691208e+02  -3.9089010e+02
   2.3386045e+01  -2.6175706e+01   0.0000000e+00   1.7365817e+02   3.0279005e+02  -9.0182862e+01
   2.3501106e+01  -2.6097781e+01   0.0000000e+00   8.7987232e+01   1.8567061e+02   1.4727990e+02
   2.3607643e+01  -2.6010708e+01   0.0000000e+00   2.7284631e+01   4.6423675e+01   1.4930736e+02
   2.3704769e+01  -2.5915227e+01   0.0000000e+00   5.0117848e+01  -1.0065278e+01   8.4998540e+01
   2.3791685e+01  -2.5812147e+01   0.0000000e+00   1.5212669e+02  -1.7684408e+01   7.5661553e+01
   2.3867684e+01  -2.5702342e+01   0.0000000e+00   3.0778007e+02  -1.9082110e+01   2.1307173e+02
   2.3932155e+01  -2.5586739e+01   0.0000000e+00   3.0514989e+02   4.5441550e-01   5.3289671e+02
   2.3984591e+01  -2.5466309e+01   0.0000000e+00  -1.0126467e+02   2.3589725e+01   7.4626117e+02
   2.4024590e+01  -2.5342065e+01   0.0000000e+00  -5.7941793e+02  -7.6463366e+00   4.0431218e+02
   2.4051855e+01  -2.5215044e+01   0.0000000e+00  -5.2858656e+02  -1.8929981e+01  -1.7067356e+02
   2.4066201e+01  -2.5086305e+01   0.0000000e+00  -2.4761707e+02   5.0428314e+01  -3.4433187e+02
   2.4067549e+01  -2.4956919e+01   0.0000000e+00  -1.7375272e+02   6.8200124e+01  -3.7649801e+02
   2.4055928e+01  -2.4827958e+01   0.0000000e+00  -4.5162825e+01  -1.2992048e+00  -4.5807315e+02
   2.4031475e+01  -2.4700486e+01   0.0000000e+00   1.1734706e+02  -4.3443066e+01  -3.7154761e+02
   2.3994430e+01  -2.4575552e+01   0.0000000e+00   1.6488085e+02  -3.3958407e+01  -2.2175303e+02
   2.3945134e+01  -2.4454183e+01   0.0000000e+00   1.7287004e+02  -3.3643421e+00  -9.8785280e+01
   2.3884024e+01  -2.4337372e+01   0.0000000e+00   1.3423824e+02   1.5853510e+01  -5.8381699e+00
   2.3811632e+01  -2.4226071e+01   0.0000000e+00   5.0315082e+01   1.1652948e+01   9.0524431e+00
   2.3375689e+01  -2.3671439e+01   0.0000000e+00   1.6507219e+01  -1.0772891e+01  -2.8453855e+01
   2.3252789e+01  -2.3610399e+01   0.0000000e+00   2.6235933e+01  -4.0245084e+01  -5.0126252e+01
   2.3124911e+01  -2.3558757e+01   0.0000000e+00   5.7232699e+01  -6.9423379e+01  -3.9345393e+01
   2.2992907e+01  -2.3516857e+01   0.0000000e+00   8.0507309e+01  -8.2253707e+01   3.5808828e+00
   2.2857652e+01  -2.3484975e+01   0.0000000e+00   7.8788053e+01  -8.2115256e+01   4.9080872e+01
   2.2720038e+01  -2.3463321e+01   0.0000000e+00   6.5088976e+01  -6.9659879e+01   9.4039303e+01
   2.2580974e+01  -2.3452037e+01   0.0000000e+00   5.7935155e+01  -2.4474063e+01   1.1804513e+02
   2.2441376e+01  -2.3451200e+01   0.0000000e+00   5.9539230e+01   1.2577608e+01   9.6999717e+01
   2.2302165e+01  -2.3460813e+01   0.0000000e+00   5.1049835e+01   2.5962415e+01   9.3744118e+01
   2.2164258e+01  -2.3480814e+01   0.0000000e+00   3.7883784e+01   8.5687926e+01   7.3626286e+01
   2.2028563e+01  -2.3511070e+01   0.0000000e+00   2.7686977e+01   8.5850986e+01  -5.3972738e+01
   2.1895979e+01  -2.3551382e+01   0.0000000e+00   2.3450487e+01  -7.3949073e+01  -1.0911140e+02
   2.1767383e+01  -2.3601484e+01   0.0000000e+00   4.4087249e+01  -1.9019067e+02   1.6896722e+01
   2.1643629e+01  -2.3661045e+01   0.0000000e+00   7.9838501e+01  -1.5548760e+02   1.4313920e+02
   2.1525543e+01  -2.3729670e+01   0.0000000e+00   1.2153575e+02  -8.2235181e+01   1.7085117e+02
   2.1413916e+01  -2.3806904e+01   0.0000000e+00   1.5787935e+02  -4.7250248e+01   1.2636686e+02
   2.1309500e+01  -2.3892235e+01   0.0000000e+00   1.5203958e+02  -6.3934640e+01   6.8794402e+01
   2.1213003e+01  -2.3985096e+01   0.0000000e+00   1.2049711e+02  -9.5707380e+01   6.3817315e+01
   2.1125086e+01  -2.4084868e+01   0.0000000e+00   1.2498036e+02  -9.3771754e+01   8.5795257e+01
   2.1046355e+01  -2.4190885e+01   0.0000000e+00   1.6429222e+02  -6.8735880e+01   5.8340964e+01
   2.0977359e+01  -2.4302438e+01   0.0000000e+00   1.8820633e+02  -5.7471803e+01  -2.2863959e+01
   2.0918587e+01  -2.4418778e+01   0.0000000e+00   1.7196351e+02  -5.7604722e+01  -1.1832014e+02
   2.0870461e+01  -2.4539125e+01   0.0000000e+00   1.0534264e+02  -4.5981145e+01  -1.9966212e+02
   2.0833338e+01  -2.4662665e+01   0.0000000e+00  -3.6292271e+00  -1.9246258e+01  -2.2334007e+02
   2.0807500e+01  -2.4788566e+01   0.0000000e+00  -9.7573136e+01   6.3894512e+00  -1.6043504e+02
   2.0793157e+01  -2.4915972e+01   0.0000000e+00  -1.2112666e+02   2.0292939e+01  -5.4840919e+01
   2.0790442e+01  -2.5044017e+01   0.0000000e+00  -8.5398085e+01   2.8917532e+01   2.6979340e+01
   2.0799410e+01  -2.5171828e+01   0.0000000e+00  -2.2697878e+01   2.9273501e+01   6.4337245e+01
   2.0820036e+01  -2.5298531e+01   0.0000000e+00   3.3937077e+01   1.1718584e+01   4.8612570e+01
   2.0852214e+01  -2.5423255e+01   0.0000000e+00   2.9741922e+01  -1.8433314e+01   2.7136553e+01
   2.0895760e+01  -2.5545142e+01   0.0000000e+00   2.4459053e+01  -6.3339135e+01   7.5572486e+01
   2.0950406e+01  -2.5663350e+01   0.0000000e+00   1.0748801e+02  -1.1345932e+02   8.6666232e+01
   2.1015807e+01  -2.5777060e+01   0.0000000e+00   1.6001659e+02  -1.1803274e+02  -3.2046778e+01
   2.1091539e+01  -2.5885481e+01   0.0000000e+00   1.0879209e+02  -8.0388461e+01  -1.2661996e+02
   2.1177102e+01  -2.5987858e+01   0.0000000e+00   6.7295560e+01  -7.4154130e+01  -1.3160361e+02
   2.1271924e+01  -2.6083476e+01   0.0000000e+00   4.5982512e+01  -1.0767120e+02  -1.7092538e+02
   2.1375364e+01  -2.6171663e+01   0.0000000e+00  -3.4393910e+01  -8.4548786e+01  -2.5850400e+02
   2.1486712e+01  -2.6251800e+01   0.0000000e+00  -1.3315840e+02   2.9346522e+01  -2.5613934e+02
   2.1605202e+01  -2.6323323e+01   0.0000000e+00  -1.4620503e+02   1.1361469e+02  -1.3571700e+02
   2.1730011e+01  -2.6385727e+01   0.0000000e+00  -9.0689560e+01   9.2143607e+01  -2.6248871e+01
   2.1860266e+01  -2.6438570e+01   0.0000000e+00  -4.6170663e+01   2.6695957e+01  -1.1014457e+00
   2.1995052e+01  -2.6481479e+01   0.0000000e+00  -1.6007581e+01   5.3228357e+00  -1.6950952e+01
   2.2133419e+01  -2.6514149e+01   0.0000000e+00   7.4920770e+00   5.8028809e+00   4.9275410e+00
   2.2274388e+01  -2.6536348e+01   0.0000000e+00  -2.6933372e+00  -4.8293432e+01   3.1338076e+01
   2.2416960e+01  -2.6547918e+01   0.0000000e+00  -3.2346903e+01  -1.2153481e+02  -5.7693080e+00
   2.2560121e+01  -2.6548777e+01   0.0000000e+00  -1.6870258e+01  -1.7572611e+02  -1.2523803e+02
   2.2702855e+01  -2.6538919e+01   0.0000000e+00   6.0568594e+01  -1.1853147e+02  -3.1814703e+02
   2.2844148e+01  -2.6518414e+01   0.0000000e+00   1.2020187e+02   1.1410666e+02  -3.0546335e+02
   2.2982999e+01  -2.6487408e+01   0.0000000e+00   2.4173592e+01   1.5843795e+02  -2.6902752e-01
   2.3118424e+01  -2.6446121e+01   0.0000000e+00  -1.5995813e+02  -7.7806454e+01  -5.0418953e+00
   2.3249467e+01  -2.6394845e+01   0.0000000e+00  -1.5340665e+02  -2.7487163e+01  -3.5925920e+02
   2.3375208e+01  -2.6333945e+01   0.0000000e+00   2.4573614e+01   2.6572350e+02  -3.5443913e+02
   2.3494767e+01  -2.6263850e+01   0.0000000e+00   1.1437122e+02   2.8347299e+02  -2.4524328e+01
   2.3607312e+01  -2.6185057e+01   0.0000000e+00   7.8245930e+01   9.8470949e+01   1.4162246e+02
   2.3712068e+01  -2.6098119e+01   0.0000000e+00   3.0738650e+01  -1.1733350e+01   1.0610660e+02
   2.3808315e+01  -2.6003648e+01   0.0000000e+00   1.9666651e+01  -2.6597557e+01   2.6564258e+01
   2.3895402e+01  -2.5902307e+01   0.0000000e+00   4.7226524e+01  -2.6163983e+01  -4.5117391e+01
   2.3972745e+01  -2.5794804e+01   0.0000000e+00   1.6314083e+02  -4.9129371e+01  -9.3263664e+01
   2.4039831e+01  -2.5681889e+01   0.0000000e+00   3.5787042e+02  -6.8229986e+01   6.0747241e+01
   2.4096225e+01  -2.5564347e+01   0.0000000e+00   3.1951665e+02  -1.0178317e+02   5.0514060e+02
   2.4141569e+01  -2.5442993e+01   0.0000000e+00  -1.7705602e+02  -1.5362556e+02   7.1859236e+02
   2.4175583e+01  -2.5318666e+01   0.0000000e+00  -5.7469370e+02  -1.3021801e+02   2.4201967e+02
   2.4198068e+01  -2.5192222e+01   0.0000000e+00  -3.5995630e+02   1.6021220e+01  -2.5071220e+02
   2.4208907e+01  -2.5064529e+01   0.0000000e+00  -1.4851914e+02   1.6413166e+02  -2.2453892e+02
   2.4208062e+01  -2.4936463e+01   0.0000000e+00  -2.1019204e+02   1.7682504e+02  -2.6766862e+02
   2.4195575e+01  -2.4808896e+01   0.0000000e+00  -6.6681725e+01   1.0912469e+02  -4.2913865e+02
   2.4171566e+01  -2.4682697e+01   0.0000000e+00   1.3041375e+02   6.6005659e+01  -3.5752294e+02
   2.4136234e+01  -2.4558721e+01   0.0000000e+00   1.7608205e+02   3.4083149e+01  -2.2776854e+02
   2.4089849e+01  -2.4437808e+01   0.0000000e+00   1.7886707e+02   2.8527326e+00  -1.1055224e+02
   2.4032755e+01  -2.4320772e+01   0.0000000e+00   1.1941485e+02  -6.1029366e+00  -2.5925224e+00
   2.3965366e+01  -2.4208401e+01   0.0000000e+00   2.9939280e+01  -2.3392559e+00   1.2080469e+01
   2.3888159e+01  -2.4101448e+01   0.0000000e+00  -4.6759643e+00   2.7634413e+00  -4.9258637e+01
   2.3801674e+01  -2.4000630e+01   0.0000000e+00   3.7207465e+01  -1.0335286e+01  -1.0079625e+02
   2.3706508e+01  -2.3906619e+01   0.0000000e+00   9.4537473e+01  -3.4056566e+01  -6.4812342e+01
   2.3603315e+01  -2.3820042e+01   0.0000000e+00   8.6245240e+01  -2.2593230e+01   6.1206094e+00
   2.3492793e+01  -2.3741475e+01   0.0000000e+00   3.8919137e+01   4.9296858e-01   8.6386896e+00
   2.2885146e+01  -2.3358892e+01   0.0000000e+00   2.9690464e+01  -8.0100354e+01   8.8846251e+01
   2.2747192e+01  -2.3336925e+01   0.0000000e+00   2.8253762e+01  -6.9348296e+01   1.0612245e+02
   2.2607843e+01  -2.3324592e+01   0.0000000e+00   3.1960571e+01  -3.8511194e+01   1.2258684e+02
   2.2467885e+01  -2.3321961e+01   0.0000000e+00   4.1371663e+01   5.9463763e+00   1.2186643e+02
   2.2328108e+01  -2.3329048e+01   0.0000000e+00   2.9972436e+01   4.4621743e+01   1.0408085e+02
   2.2189302e+01  -2.3345813e+01   0.0000000e+00   3.0424111e+00   9.6758552e+01   6.4302042e+01
   2.2052250e+01  -2.3372160e+01   0.0000000e+00  -2.1000836e+00   1.1453356e+02  -6.1762877e+01
   2.1917727e+01  -2.3407942e+01   0.0000000e+00  -7.9930842e+00  -2.6579999e+01  -1.5841308e+02
   2.1786497e+01  -2.3452954e+01   0.0000000e+00  -1.5404574e+01  -1.8250763e+02  -3.9494977e+01
   2.1659305e+01  -2.3506944e+01   0.0000000e+00  -2.9611070e+00  -1.5893816e+02   1.3829007e+02
   2.1536875e+01  -2.3569604e+01   0.0000000e+00   9.6823959e+00  -6.2376588e+01   2.0684377e+02
   2.1419911e+01  -2.3640580e+01   0.0000000e+00   2.7261848e+01   1.9074963e+00   2.1499728e+02
   2.1309083e+01  -2.3719467e+01   0.0000000e+00   5.1426938e+01   3.3620231e+01   1.8784837e+02
   2.1205035e+01  -2.3805818e+01   0.0000000e+00   5.1622633e+01   2.4374466e+01   1.4299226e+02
   2.1108372e+01  -2.3899139e+01   0.0000000e+00   3.3714649e+01  -6.5476200e+00   1.3620685e+02
   2.1019662e+01  -2.3998898e+01   0.0000000e+00   4.8537906e+01  -2.0566023e+01   1.6299135e+02
   2.0939431e+01  -2.4104524e+01   0.0000000e+00   1.0197015e+02  -1.9507927e+01   1.5919308e+02
   2.0868161e+01  -2.4215411e+01   0.0000000e+00   1.4877650e+02  -3.0034069e+01   1.0930090e+02
   2.0806283e+01  -2.4330923e+01   0.0000000e+00   1.7048426e+02  -5.2643816e+01   3.8261311e+01
   2.0754180e+01  -2.4450392e+01   0.0000000e+00   1.6386256e+02  -7.1983046e+01  -5.2622284e+01
   2.0712181e+01  -2.4573129e+01   0.0000000e+00   1.0690840e+02  -7.8016961e+01  -1.4573152e+02
   2.0680558e+01  -2.4698422e+01   0.0000000e+00   3.8530511e+00  -6.3543878e+01  -1.8229120e+02
   2.0659528e+01  -2.4825544e+01   0.0000000e+00  -8.3808521e+01  -3.7160543e+01  -1.3020062e+02
   2.0649244e+01  -2.4953753e+01   0.0000000e+00  -9.9153029e+01  -1.4890753e+01  -4.2688246e+01
   2.0649800e+01  -2.5082300e+01   0.0000000e+00  -6.7973767e+01  -5.3228955e+00   1.6072904e+01
   2.0661227e+01  -2.5210431e+01   0.0000000e+00  -2.2983658e+01  -1.3656738e+01   4.3287599e+01
   2.0683492e+01  -2.5337393e+01   0.0000000e+00   1.0825296e+01  -3.0430047e+01   3.2417699e+01
   2.0716498e+01  -2.5462436e+01   0.0000000e+00  -4.8058877e+00  -3.9932663e+01   3.3083821e+01
   2.0760083e+01  -2.5584819e+01   0.0000000e+00   1.4275945e+01  -4.8575856e+01   1.0398526e+02
   2.0814019e+01  -2.5703817e+01   0.0000000e+00   1.3315651e+02  -7.1722314e+01   1.0994462e+02
   2.0878018e+01  -2.5818719e+01   0.0000000e+00   1.8344222e+02  -8.5287858e+01  -3.0346793e+01
   2.0951725e+01  -2.5928839e+01   0.0000000e+00   1.0010492e+02  -8.2163268e+01  -1.3266326e+02
   2.1034725e+01  -2.6033518e+01   0.0000000e+00   4.5608402e+01  -8.1146548e+01  -1.3259969e+02
   2.1126546e+01  -2.6132125e+01   0.0000000e+00   4.4824729e+01  -7.6707884e+01  -1.3573701e+02
   2.1226655e+01  -2.6224067e+01   0.0000000e+00   1.3959342e+01  -6.0346138e+01  -1.6994027e+02
   2.1334468e+01  -2.6308787e+01   0.0000000e+00  -5.7977481e+01  -2.2094175e+00  -1.8947282e+02
   2.1449347e+01  -2.6385773e+01   0.0000000e+00  -1.2150301e+02   7.1374255e+01  -1.3406755e+02
   2.1570610e+01  -2.6454557e+01   0.0000000e+00  -1.2282267e+02   8.5830221e+01  -4.4636036e+01
   2.1697530e+01  -2.6514720e+01   0.0000000e+00  -8.5089912e+01   5.4899506e+01   1.2137019e+01
   2.1829343e+01  -2.6565895e+01   0.0000000e+00  -4.9217439e+01   2.0444859e+00   2.6040594e+01
   2.1965251e+01  -2.6607770e+01   0.0000000e+00  -2.0533184e+01  -2.8324259e+01  -1.5464063e+01
   2.2104427e+01  -2.6640090e+01   0.0000000e+00  -1.4664483e+00  -1.1382854e+01  -3.9367534e+01
   2.2246024e+01  -2.6662655e+01   0.0000000e+00   1.0400340e+01  -2.3296244e+01  -1.0744058e+01
   2.2389175e+01  -2.6675328e+01   0.0000000e+00   1.2882300e+01  -8.8620449e+01  -5.5862630e+00
   2.2533005e+01  -2.6678032e+01   0.0000000e+00  -1.0618273e+01  -1.6468783e+02  -9.8620635e+01
   2.2676632e+01  -2.6670749e+01   0.0000000e+00  -7.5177816e+01  -1.5841783e+02  -3.1998934e+02
   2.2819178e+01  -2.6653524e+01   0.0000000e+00  -8.2665089e+01   4.6156144e+01  -4.8133749e+02
   2.2959771e+01  -2.6626464e+01   0.0000000e+00  -6.9592665e-01   2.5068952e+02  -2.6722647e+02
   2.3097552e+01  -2.6589733e+01   0.0000000e+00  -3.2114985e+01   1.0392935e+02   2.4313779e+01
   2.3231682e+01  -2.6543556e+01   0.0000000e+00  -1.6398025e+02  -4.8423609e+01  -1.0897063e+02
   2.3361348e+01  -2.6488215e+01   0.0000000e+00  -1.6986429e+02   1.5280594e+02  -2.7282014e+02
   2.3485766e+01  -2.6424049e+01   0.0000000e+00  -5.9970091e+01   2.8418212e+02  -1.1176532e+02
   2.3604188e+01  -2.6351448e+01   0.0000000e+00   2.8614801e+01   1.4464235e+02   5.2183854e+01
   2.3715908e+01  -2.6270853e+01   0.0000000e+00   5.8219541e+01  -1.6815717e+00   5.7919575e+01
   2.3820262e+01  -2.6182753e+01   0.0000000e+00   5.6284530e+01  -4.6485727e+01   1.5434587e+01
   2.3916638e+01  -2.6087682e+01   0.0000000e+00   5.1576107e+01  -2.7236278e+01  -1.0557602e+01
   2.4004476e+01  -2.5986214e+01   0.0000000e+00   2.7622992e+01   9.0526417e+00  -2.0015661e+01
   2.4083268e+01  -2.5878959e+01   0.0000000e+00   2.0020836e+01   3.3737460e+01  -7.7805400e+01
   2.4152569e+01  -2.5766561e+01   0.0000000e+00   1.3010270e+02   2.4900013e+01  -9.3184260e+01
   2.4211992e+01  -2.5649693e+01   0.0000000e+00   2.6728237e+02  -1.2353406e+02   1.0650590e+02
   2.4261212e+01  -2.5529053e+01   0.0000000e+00   1.5392023e+02  -3.3129170e+02   3.9105278e+02
   2.4299968e+01  -2.5405359e+01   0.0000000e+00  -2.3856156e+02  -3.2017574e+02   3.1829059e+02
   2.4328063e+01  -2.5279343e+01   0.0000000e+00  -3.3863233e+02  -6.9311396e+01  -1.1446656e+02
   2.4345364e+01  -2.5151752e+01   0.0000000e+00  -8.4440163e+01   1.6275789e+02  -1.7785691e+02
   2.4351805e+01  -2.5023336e+01   0.0000000e+00  -1.4824768e+02   2.1899246e+02   2.3812463e+00
   2.4347380e+01  -2.4894850e+01   0.0000000e+00  -2.6166320e+02   1.7184949e+02  -2.0262448e+02
   2.4332151e+01  -2.4767047e+01   0.0000000e+00  -2.3837984e+01   1.2270380e+02  -3.6839366e+02
   2.4306238e+01  -2.4640673e+01   0.0000000e+00   1.4310960e+02   9.9990530e+01  -2.4567214e+02
   2.4269825e+01  -2.4516463e+01   0.0000000e+00   1.5644632e+02   7.7234432e+01  -1.5024848e+02
   2.4223154e+01  -2.4395138e+01   0.0000000e+00   1.5432555e+02   4.4053050e+01  -7.1497723e+01
   2.4166523e+01  -2.4277400e+01   0.0000000e+00   8.3333880e+01   1.7872452e+01  -6.0926533e+00
   2.4100285e+01  -2.4163929e+01   0.0000000e+00   1.2339328e+01   3.8831589e+00  -2.2210387e+01
   2.4024848e+01  -2.4055378e+01   0.0000000e+00   7.5791830e+00   3.7405936e+00  -6.7024184e+01
   2.3940665e+01  -2.3952370e+01   0.0000000e+00   5.0974220e+01   1.0850684e+00  -9.1790989e+01
   2.3848239e+01  -2.3855496e+01   0.0000000e+00   9.4994650e+01  -1.9808239e+01  -6.4563472e+01
   2.3748115e+01  -2.3765309e+01   0.0000000e+00   8.5143235e+01  -2.9731393e+01   1.8338171e+00
   2.3640879e+01  -2.3682323e+01   0.0000000e+00   3.2597941e+01  -4.6870337e+00   2.6131302e+01
   2.3527155e+01  -2.3607013e+01   0.0000000e+00   4.9193676e-01   7.2629469e+00  -1.6497392e+01
   2.3407598e+01  -2.3539804e+01   0.0000000e+00   9.8733621e+00  -1.9345672e+01  -5.8381990e+01
   2.3282895e+01  -2.3481081e+01   0.0000000e+00   4.2783130e+01  -6.0896013e+01  -5.4754500e+01
   2.3153759e+01  -2.3431174e+01   0.0000000e+00   6.4721220e+01  -8.7251807e+01   2.3050522e+00
   2.3020924e+01  -2.3390368e+01   0.0000000e+00   4.8309958e+01  -8.5228467e+01   6.2190601e+01
   2.2313461e+01  -2.3201601e+01   0.0000000e+00   6.3740551e+00   7.8392426e+01   9.3533127e+01
   2.2174341e+01  -2.3218180e+01   0.0000000e+00  -5.7224371e+00   1.0944825e+02   3.1808133e+00
   2.2036814e+01  -2.3243714e+01   0.0000000e+00   1.9054735e+01   8.6679087e+01  -1.1039588e+02
   2.1901552e+01  -2.3278077e+01   0.0000000e+00   2.3623776e+01  -3.8934924e+01  -1.8112621e+02
   2.1769220e+01  -2.3321100e+01   0.0000000e+00  -1.5497212e+01  -1.7270135e+02  -7.2417962e+01
   2.1640468e+01  -2.3372575e+01   0.0000000e+00  -3.2263786e+01  -1.3403815e+02   9.2514100e+01
   2.1515932e+01  -2.3432246e+01   0.0000000e+00  -3.5122552e+01  -1.6135309e+01   1.2985524e+02
   2.1396230e+01  -2.3499823e+01   0.0000000e+00  -4.7833145e+01   5.8066161e+01   1.1047629e+02
   2.1281956e+01  -2.3574971e+01   0.0000000e+00  -5.2636608e+01   1.0491873e+02   9.0456687e+01
   2.1173683e+01  -2.3657321e+01   0.0000000e+00  -4.8722551e+01   1.1822595e+02   5.8731362e+01
   2.1071957e+01  -2.3746467e+01   0.0000000e+00  -5.1997423e+01   9.5262514e+01   3.8540753e+01
   2.0977292e+01  -2.3841967e+01   0.0000000e+00  -5.9331692e+01   6.8084065e+01   6.1814620e+01
   2.0890172e+01  -2.3943350e+01   0.0000000e+00  -3.7746838e+01   6.4211372e+01   1.1303478e+02
   2.0811049e+01  -2.4050112e+01   0.0000000e+00   1.3334627e+01   7.3454535e+01   1.3937280e+02
   2.0740335e+01  -2.4161722e+01   0.0000000e+00   5.8246937e+01   7.1022106e+01   1.2872573e+02
   2.0678403e+01  -2.4277624e+01   0.0000000e+00   8.6929535e+01   4.8126519e+01   9.8171027e+01
   2.0625589e+01  -2.4397238e+01   0.0000000e+00   1.0637262e+02   4.8987373e+00   4.5553833e+01
   2.0582181e+01  -2.4519965e+01   0.0000000e+00   1.0261780e+02  -4.4955209e+01  -2.7629556e+01
   2.0548425e+01  -2.4645188e+01   0.0000000e+00   5.4389727e+01  -7.1013077e+01  -9.3868756e+01
   2.0524521e+01  -2.4772277e+01   0.0000000e+00  -2.9321435e+01  -6.5252063e+01  -1.0236194e+02
   2.0510619e+01  -2.4900589e+01   0.0000000e+00  -7.8575754e+01  -4.6086738e+01  -4.0708252e+01
   2.0506821e+01  -2.5029474e+01   0.0000000e+00  -7.3945320e+01  -2.7448350e+01   2.4021937e+01
   2.0513178e+01  -2.5158276e+01   0.0000000e+00  -5.1182820e+01  -2.2921933e+01   7.3345713e+01
   2.0529689e+01  -2.5286339e+01   0.0000000e+00  -1.0330910e+01  -2.7289020e+01   9.2414300e+01
   2.0556303e+01  -2.5413007e+01   0.0000000e+00  -9.1053739e-01  -3.4921881e+01   7.4552323e+01
   2.0592913e+01  -2.5537629e+01   0.0000000e+00  -8.1669497e+00  -4.3264970e+01   9.4446373e+01
   2.0639364e+01  -2.5659565e+01   0.0000000e+00   7.3735458e+01  -4.8288347e+01   1.2740243e+02
   2.0695445e+01  -2.5778184e+01   0.0000000e+00   1.8490840e+02  -5.7805314e+01   3.3880919e+01
   2.0760893e+01  -2.5892871e+01   0.0000000e+00   1.3894785e+02  -6.1744153e+01  -1.1166005e+02
   2.0835398e+01  -2.6003030e+01   0.0000000e+00   2.7204830e+01  -8.0869699e+01  -1.1415184e+02
   2.0918594e+01  -2.6108086e+01   0.0000000e+00   3.6772559e+01  -1.0744858e+02  -7.9589672e+01
   2.1010072e+01  -2.6207491e+01   0.0000000e+00   7.5318278e+01  -8.0654141e+01  -1.2715897e+02
   2.1109371e+01  -2.6300723e+01   0.0000000e+00   4.9247663e+01  -3.1705983e+01  -1.7503191e+02
   2.1215991e+01  -2.6387291e+01   0.0000000e+00  -4.1503057e+00   1.7977040e+01  -2.0115592e+02
   2.1329383e+01  -2.6466740e+01   0.0000000e+00  -7.1654037e+01   9.3086951e+01  -1.6577348e+02
   2.1448965e+01  -2.6538649e+01   0.0000000e+00  -1.0606207e+02   1.1035325e+02  -5.2373746e+01
   2.1574114e+01  -2.6602638e+01   0.0000000e+00  -8.0178593e+01   6.5511056e+01   1.9183668e+01
   2.1704176e+01  -2.6658366e+01   0.0000000e+00  -4.2393232e+01   2.7767523e+01   3.9689467e+01
   2.1838468e+01  -2.6705539e+01   0.0000000e+00  -2.0384564e+01  -1.7389087e+01   2.6053775e+01
   2.1976280e+01  -2.6743904e+01   0.0000000e+00  -2.5409966e+01  -3.5358059e+01  -2.4131962e+01
   2.2116882e+01  -2.6773258e+01   0.0000000e+00  -3.0518387e+01  -2.8416205e+01  -4.5217760e+01
   2.2259526e+01  -2.6793443e+01   0.0000000e+00  -1.1481917e+01  -5.0578431e+01  -4.9134591e+01
   2.2403453e+01  -2.6804352e+01   0.0000000e+00   5.3739579e+00  -9.7039650e+01  -9.5464044e+01
   2.2547895e+01  -2.6805927e+01   0.0000000e+00  -3.0339386e+01  -8.8205655e+01  -1.8678775e+02
   2.2692082e+01  -2.6798159e+01   0.0000000e+00  -1.7907051e+02  -4.6576969e+00  -2.3685371e+02
   2.2835244e+01  -2.6781090e+01   0.0000000e+00  -2.9839495e+02   8.2768066e+01  -2.5748915e+02
   2.2976618e+01  -2.6754810e+01   0.0000000e+00  -1.9862384e+02   1.7831941e+02  -1.9464068e+02
   2.3115452e+01  -2.6719461e+01   0.0000000e+00  -8.1777558e+01   1.3451102e+02  -2.5113765e+01
   2.3251011e+01  -2.6675231e+01   0.0000000e+00  -1.1564980e+02   2.9833478e+01  -3.0774356e+01
   2.3382576e+01  -2.6622354e+01   0.0000000e+00  -1.3940021e+02   1.2764517e+02  -8.0493733e+01
   2.3509455e+01  -2.6561113e+01   0.0000000e+00  -9.1447992e+01   1.8423927e+02   3.3034715e+01
   2.3630984e+01  -2.6491832e+01   0.0000000e+00  -3.5428177e+01   7.1265695e+01   7.3872536e+01
   2.3746529e+01  -2.6414879e+01   0.0000000e+00  -3.8324216e-01  -7.4469216e+00  -3.8034711e+00
   2.3855494e+01  -2.6330661e+01   0.0000000e+00   1.4638410e+01  -2.0201248e+01  -6.5015286e+01
   2.3957318e+01  -2.6239621e+01   0.0000000e+00   3.0927577e+01  -1.5512178e+01  -9.6680563e+01
   2.4051485e+01  -2.6142240e+01   0.0000000e+00   6.2229168e+01   1.3140865e+01  -8.3417381e+01
   2.4137520e+01  -2.6039027e+01   0.0000000e+00   5.9506042e+01   4.0607213e+01  -2.3774774e+01
   2.4214996e+01  -2.5930524e+01   0.0000000e+00   3.0769231e+01   7.1503481e+01   8.8401257e+00
   2.4283534e+01  -2.5817298e+01   0.0000000e+00   2.5481443e+00   6.4131851e+01   2.7776356e+01
   2.4342803e+01  -2.5699936e+01   0.0000000e+00  -1.2714272e+01  -1.0816486e+02  -3.6629956e+01
   2.4392524e+01  -2.5579048e+01   0.0000000e+00   6.4805698e+01  -2.9744510e+02  -1.2419756e+02
   2.4432471e+01  -2.5455260e+01   0.0000000e+00   3.0592515e+01  -2.3816339e+02  -6.8058988e+01
   2.4462467e+01  -2.5329209e+01   0.0000000e+00  -1.0227314e+02   1.2985730e+01  -8.2297386e+01
   2.4482391e+01  -2.5201543e+01   0.0000000e+00  -3.4573479e+01   1.7788826e+02  -4.5264884e+01
   2.4492172e+01  -2.5072917e+01   0.0000000e+00  -9.4698741e+01   1.5235542e+02   1.4683405e+02
   2.4491793e+01  -2.4943986e+01   0.0000000e+00  -2.9887598e+02   1.1413689e+02   2.1879576e+00
   2.4481286e+01  -2.4815408e+01   0.0000000e+00  -1.6026062e+02   1.2638922e+02  -2.9737358e+02
   2.4460738e+01  -2.4687835e+01   0.0000000e+00   8.4396176e+01   1.0821124e+02  -2.6764354e+02
   2.4430282e+01  -2.4561912e+01   0.0000000e+00   1.2951788e+02   7.7428780e+01  -1.3865856e+02
   2.4390102e+01  -2.4438274e+01   0.0000000e+00   1.3478659e+02   5.7099776e+01  -6.9032531e+01
   2.4340427e+01  -2.4317543e+01   0.0000000e+00   9.9319138e+01   4.3613542e+01   5.0326220e+00
   2.4281532e+01  -2.4200325e+01   0.0000000e+00   2.2035996e+01   3.2123305e+01   2.0808613e+00
   2.4213738e+01  -2.4087206e+01   0.0000000e+00   1.8297125e+00   1.7683165e+01  -4.7954659e+01
   2.4137403e+01  -2.3978750e+01   0.0000000e+00   2.7471593e+01   4.1445259e+00  -7.3370426e+01
   2.4052930e+01  -2.3875497e+01   0.0000000e+00   7.0563661e+01  -7.9108322e+00  -6.4621901e+01
   2.3960755e+01  -2.3777959e+01   0.0000000e+00   9.6617194e+01  -1.2348735e+01  -2.5379336e+01
   2.3861352e+01  -2.3686621e+01   0.0000000e+00   7.7193029e+01  -1.0641547e+01   1.4707775e+01
   2.3755225e+01  -2.3601934e+01   0.0000000e+00   3.0886663e+01   5.9751005e+00   2.4785431e+01
   2.3642911e+01  -2.3524316e+01   0.0000000e+00   9.6028650e-01   2.0120387e+01  -1.5876992e+01
   2.3524973e+01  -2.3454149e+01   0.0000000e+00   1.2063432e+01  -6.7318515e-01  -6.3909566e+01
   2.3401998e+01  -2.3391780e+01   0.0000000e+00   4.1560591e+01  -4.3861572e+01  -6.8338865e+01
   2.3274596e+01  -2.3337513e+01   0.0000000e+00   4.9991486e+01  -7.5398423e+01  -1.8640724e+01
   2.3143399e+01  -2.3291616e+01   0.0000000e+00   4.7158811e+00  -6.7928998e+01   2.3777626e+01
   2.3009050e+01  -2.3254314e+01   0.0000000e+00  -4.3272672e+01  -7.9182239e+01   1.5705535e+01
   2.2872211e+01  -2.3225789e+01   0.0000000e+00  -2.8621020e+01  -1.0780823e+02   4.0929840e+01
   2.2733552e+01  -2.3206182e+01   0.0000000e+00   5.1565351e+00  -8.5164635e+01   9.1016511e+01
   2.2593752e+01  -2.3195587e+01   0.0000000e+00   1.6898776e+01  -4.4458085e+01   1.1958452e+02
   2.2453493e+01  -2.3194058e+01   0.0000000e+00   1.9774138e+01   1.0914802e+01   1.3482083e+02
   2.1717233e+01  -2.3201844e+01   0.0000000e+00  -3.5765316e+00  -1.4867528e+02  -5.6850394e+01
   2.1589456e+01  -2.3252610e+01   0.0000000e+00  -1.1954236e+01  -1.0711549e+02   5.1046732e+01
   2.1465502e+01  -2.3310923e+01   0.0000000e+00   1.5410178e+01  -8.7004280e+00   4.3028443e+01
   2.1345895e+01  -2.3376537e+01   0.0000000e+00   2.1463784e+01   4.8769819e+01  -1.4845826e+01
   2.1231146e+01  -2.3449175e+01   0.0000000e+00   9.5777958e+00   8.5632666e+01  -6.8309471e+01
   2.1121746e+01  -2.3528533e+01   0.0000000e+00  -1.2344834e+01   9.3249626e+01  -1.1023113e+02
   2.1018166e+01  -2.3614274e+01   0.0000000e+00  -3.1009095e+01   7.3274901e+01  -1.1843150e+02
   2.0920855e+01  -2.3706036e+01   0.0000000e+00  -4.3957095e+01   5.2220450e+01  -9.7469666e+01
   2.0830238e+01  -2.3803431e+01   0.0000000e+00  -4.9748243e+01   5.2462520e+01  -5.3502696e+01
   2.0746715e+01  -2.3906044e+01   0.0000000e+00  -3.3919171e+01   8.0226024e+01  -6.4039357e+00
   2.0670657e+01  -2.4013440e+01   0.0000000e+00  -3.9855733e+00   1.1967693e+02   1.5140388e+01
   2.0602407e+01  -2.4125160e+01   0.0000000e+00   1.1292074e+01   1.4810768e+02   9.2330023e+00
   2.0542276e+01  -2.4240728e+01   0.0000000e+00   7.7118845e+00   1.4173288e+02  -3.0379755e-02
   2.0490546e+01  -2.4359647e+01   0.0000000e+00   9.2733348e+00   9.4077848e+01   6.0789101e-01
   2.0447460e+01  -2.4481407e+01   0.0000000e+00   2.6258464e+01   2.9117818e+01  -1.4914563e+00
   2.0413229e+01  -2.4605485e+01   0.0000000e+00   3.5854016e+01  -1.7824636e+01  -2.9943449e+01
   2.0388028e+01  -2.4731343e+01   0.0000000e+00  -4.5817657e+00  -3.3920102e+01  -5.7207473e+01
   2.0371993e+01  -2.4858436e+01   0.0000000e+00  -5.1275668e+01  -2.3497574e+01  -1.8475192e+01
   2.0365222e+01  -2.4986213e+01   0.0000000e+00  -5.1207028e+01   1.2817204e+01   3.7022361e+01
   2.0367773e+01  -2.5114117e+01   0.0000000e+00  -4.7880328e+01   4.5117205e+01   8.4062831e+01
   2.0379663e+01  -2.5241588e+01   0.0000000e+00  -1.2812409e+01   5.5493162e+01   1.2170854e+02
   2.0400871e+01  -2.5368068e+01   0.0000000e+00   8.8187916e+00   5.6757981e+01   9.9889839e+01
   2.0431332e+01  -2.5492999e+01   0.0000000e+00  -2.2931961e+01   2.6090928e+01   1.0653024e+02
   2.0470940e+01  -2.5615832e+01   0.0000000e+00   1.5530665e+01  -2.4099378e+01   1.5192760e+02
   2.0519549e+01  -2.5736021e+01   0.0000000e+00   1.3626733e+02  -5.9622298e+01   1.0425884e+02
   2.0576970e+01  -2.5853033e+01   0.0000000e+00   1.7239851e+02  -7.2734370e+01  -6.2268161e+01
   2.0642973e+01  -2.5966347e+01   0.0000000e+00   4.5905124e+01  -6.1423611e+01  -1.4419068e+02
   2.0717289e+01  -2.6075456e+01   0.0000000e+00  -2.4847504e+01  -8.0762937e+01  -4.6727875e+01
   2.0799606e+01  -2.6179872e+01   0.0000000e+00   7.2949598e+01  -1.2700444e+02  -2.3715885e+01
   2.0889578e+01  -2.6279124e+01   0.0000000e+00   1.3089203e+02  -9.6778714e+01  -1.5811943e+02
   2.0986819e+01  -2.6372765e+01   0.0000000e+00   6.3192501e+01  -2.2275169e+01  -2.3582976e+02
   2.1090905e+01  -2.6460372e+01   0.0000000e+00  -1.1574763e+01   4.0548469e+00  -2.3830320e+02
   2.1201383e+01  -2.6541549e+01   0.0000000e+00  -7.2039545e+01   5.4776433e+01  -2.3126512e+02
   2.1317763e+01  -2.6615925e+01   0.0000000e+00  -1.1446306e+02   1.1871245e+02  -1.2583152e+02
   2.1439528e+01  -2.6683162e+01   0.0000000e+00  -8.6211233e+01   8.8942735e+01  -2.3500171e+00
   2.1566131e+01  -2.6742955e+01   0.0000000e+00  -3.5719328e+01   3.8756324e+01   2.1204546e+01
   2.1697003e+01  -2.6795028e+01   0.0000000e+00  -1.0368863e+01   1.5525541e+01   1.4690504e+01
   2.1831550e+01  -2.6839145e+01   0.0000000e+00  -9.1921761e+00  -6.7140340e+00  -1.6256550e+00
   2.1969161e+01  -2.6875102e+01   0.0000000e+00  -3.4006060e+01  -1.3229889e+01  -1.3605849e+01
   2.2109206e+01  -2.6902734e+01   0.0000000e+00  -5.0146557e+01  -3.3452859e+01  -2.0061318e+01
   2.2251046e+01  -2.6921915e+01   0.0000000e+00  -5.9569114e+01  -6.0427686e+01  -5.5679400e+01
   2.2394029e+01  -2.6932557e+01   0.0000000e+00  -8.3832182e+01  -9.4288168e+01  -1.2628052e+02
   2.2537499e+01  -2.6934610e+01   0.0000000e+00  -9.8028932e+01  -3.7721335e+01  -2.3289374e+02
   2.2680797e+01  -2.6928065e+01   0.0000000e+00  -1.4956369e+02   1.4129325e+02  -1.5052893e+02
   2.2823264e+01  -2.6912952e+01   0.0000000e+00  -2.4900986e+02   1.3027129e+02   6.0895304e+01
   2.2964246e+01  -2.6889341e+01   0.0000000e+00  -2.2298882e+02   2.0771514e+01   3.4712997e+01
   2.3103099e+01  -2.6857339e+01   0.0000000e+00  -9.4089628e+01   5.7154659e+01  -2.0268773e+01
   2.3239186e+01  -2.6817095e+01   0.0000000e+00  -6.5021213e+01   5.2698916e+01   1.7035914e+01
   2.3371887e+01  -2.6768793e+01   0.0000000e+00  -6.7552235e+01   5.5369160e+01   4.0409518e-01
   2.3500601e+01  -2.6712653e+01   0.0000000e+00  -2.1517790e+01   8.2081889e+01   4.8781963e+01
   2.3624745e+01  -2.6648934e+01   0.0000000e+00   6.1698252e+00   1.3921050e+01   7.0671467e+01
   2.3743763e+01  -2.6577925e+01   0.0000000e+00   1.1009187e+00  -9.1048041e+00  -6.6691033e-01
   2.3857121e+01  -2.6499951e+01   0.0000000e+00  -2.6702920e+01   2.9637965e+01  -4.1524723e+01
   2.3964317e+01  -2.6415367e+01   0.0000000e+00  -4.9683822e+01   4.3073444e+01  -6.0074137e+01
   2.4064881e+01  -2.6324555e+01   0.0000000e+00  -4.0481842e+01   4.7698438e+01  -8.9217392e+01
   2.4158373e+01  -2.6227927e+01   0.0000000e+00   6.8833790e+00   6.3452929e+01  -8.6893422e+01
   2.4244391e+01  -2.6125919e+01   0.0000000e+00   4.8191099e+01   5.9737197e+01  -3.2356258e+01
   2.4322568e+01  -2.6018991e+01   0.0000000e+00   7.1370525e+01   5.1286108e+01   2.8340216e+01
   2.4392575e+01  -2.5907622e+01   0.0000000e+00   4.3534677e+01   5.6051942e+01   1.2082534e+02
   2.4454124e+01  -2.5792311e+01   0.0000000e+00  -1.3083784e+02   1.0384638e+01   8.1378781e+01
   2.4506966e+01  -2.5673573e+01   0.0000000e+00  -1.8584603e+02  -2.2596725e+01  -2.3773341e+02
   2.4550892e+01  -2.5551935e+01   0.0000000e+00   3.3624373e+01   4.4994786e+01  -3.5700526e+02
   2.4585736e+01  -2.5427937e+01   0.0000000e+00   1.0091966e+02   1.3135805e+02  -1.0783804e+02
   2.4611372e+01  -2.5302127e+01   0.0000000e+00  -1.3670026e+01   1.6104674e+02   6.4640552e+01
   2.4627716e+01  -2.5175060e+01   0.0000000e+00  -7.7358923e+01   9.0235574e+01   1.2977466e+02
   2.4634725e+01  -2.5047293e+01   0.0000000e+00  -1.9350222e+02  -4.4244763e+00   1.1698205e+02
   2.4632399e+01  -2.4919386e+01   0.0000000e+00  -2.4584948e+02   4.0389537e+01  -8.3090000e+01
   2.4620777e+01  -2.4791896e+01   0.0000000e+00  -8.5548126e+01   1.2791108e+02  -2.3977473e+02
   2.4599937e+01  -2.4665380e+01   0.0000000e+00   6.7784158e+01   1.2150981e+02  -1.9697413e+02
   2.4569998e+01  -2.4540385e+01   0.0000000e+00   9.9610471e+01   8.3620452e+01  -1.2498059e+02
   2.4531116e+01  -2.4417453e+01   0.0000000e+00   1.1004248e+02   5.1706045e+01  -6.5796658e+01
   2.4483484e+01  -2.4297112e+01   0.0000000e+00   7.1233620e+01   2.8890054e+01   7.6578707e+00
   2.4427330e+01  -2.4179882e+01   0.0000000e+00   5.7785230e-01   2.3729337e+01   6.9626856e+00
   2.4362920e+01  -2.4066264e+01   0.0000000e+00  -1.4518704e+01   1.4388051e+01  -3.7624822e+01
   2.4290548e+01  -2.3956746e+01   0.0000000e+00   8.8794090e+00  -8.2903485e-01  -6.4103263e+01
   2.4210544e+01  -2.3851793e+01   0.0000000e+00   4.9842184e+01  -1.9513677e+01  -7.1258931e+01
   2.4123266e+01  -2.3751854e+01   0.0000000e+00   8.9543328e+01  -3.1500701e+01  -3.0006217e+01
   2.4029099e+01  -2.3657353e+01   0.0000000e+00   8.2966854e+01  -1.7030603e+01   2.7981242e+01
   2.3928457e+01  -2.3568691e+01   0.0000000e+00   4.4319409e+01   1.3247180e+00   4.8519680e+01
   2.3821778e+01  -2.3486242e+01   0.0000000e+00   8.6443275e+00   1.7997870e+01   3.1816807e+01
   2.3709522e+01  -2.3410356e+01   0.0000000e+00   3.0623908e+00   2.2391279e+01  -1.6927111e+01
   2.3592172e+01  -2.3341352e+01   0.0000000e+00   3.1420772e+01  -9.1970797e-01  -4.9911290e+01
   2.3470229e+01  -2.3279522e+01   0.0000000e+00   5.8398898e+01  -3.4395628e+01  -4.2050473e+01
   2.3344211e+01  -2.3225124e+01   0.0000000e+00   5.8921391e+01  -5.0661288e+01  -3.4878008e+00
   2.3214650e+01  -2.3178389e+01   0.0000000e+00   2.1865532e+01  -1.7113242e+01  -1.9122582e+00
   2.3082095e+01  -2.3139511e+01   0.0000000e+00  -1.2129629e+01  -2.4294285e+01  -8.1198788e+01
   2.2947102e+01  -2.3108655e+01   0.0000000e+00  -2.7771535e+00  -1.1289463e+02  -7.8158398e+01
   2.2810237e+01  -2.3085949e+01   0.0000000e+00   1.3787497e+01  -1.2852930e+02   4.0017023e+01
   2.2672075e+01  -2.3071488e+01   0.0000000e+00   9.1874243e+00  -6.8699408e+01   1.0735498e+02
   2.2533193e+01  -2.3065334e+01   0.0000000e+00  -1.3438826e+00  -2.2003969e+01   1.2712351e+02
   2.2394173e+01  -2.3067512e+01   0.0000000e+00  -3.6227389e+00   4.8632782e+01   1.1818740e+02
   2.2255595e+01  -2.3078012e+01   0.0000000e+00   2.5685810e+00   9.8195680e+01   2.7798053e+01
   2.2118039e+01  -2.3096791e+01   0.0000000e+00   3.1210265e+01   6.4880609e+01  -5.9954268e+01
   2.1982081e+01  -2.3123771e+01   0.0000000e+00   7.5568987e+01   1.4914144e+01  -1.0323168e+02
   2.1848292e+01  -2.3158837e+01   0.0000000e+00   6.0089271e+01  -6.3921311e+01  -1.3183366e+02
   2.1145197e+01  -2.3348129e+01   0.0000000e+00   1.4595989e+02   1.4145545e+01  -8.9013049e+01
   2.1034417e+01  -2.3428449e+01   0.0000000e+00   1.1626836e+02   8.2956326e+00  -1.5067278e+02
   2.0929208e+01  -2.3514920e+01   0.0000000e+00   6.9284307e+01  -1.2909664e+01  -1.6469507e+02
   2.0829984e+01  -2.3607211e+01   0.0000000e+00   3.7703184e+01  -3.0506062e+01  -1.4039481e+02
   2.0737135e+01  -2.3704970e+01   0.0000000e+00   2.9830381e+01  -2.8998133e+01  -1.0556314e+02
   2.0651028e+01  -2.3807824e+01   0.0000000e+00   3.9462841e+01  -1.2552291e-01  -7.8389897e+01
   2.0572011e+01  -2.3915378e+01   0.0000000e+00   6.1319140e+01   5.4180710e+01  -7.5281344e+01
   2.0500403e+01  -2.4027220e+01   0.0000000e+00   6.6175137e+01   1.1720897e+02  -1.1410756e+02
   2.0436500e+01  -2.4142920e+01   0.0000000e+00   2.3105011e+01   1.4727915e+02  -1.6119846e+02
   2.0380567e+01  -2.4262030e+01   0.0000000e+00  -3.4499370e+01   1.2542490e+02  -1.5552245e+02
   2.0332845e+01  -2.4384091e+01   0.0000000e+00  -5.3085791e+01   7.8240724e+01  -1.0125130e+02
   2.0293540e+01  -2.4508629e+01   0.0000000e+00  -2.5432490e+01   3.4431190e+01  -5.3194188e+01
   2.0262832e+01  -2.4635160e+01   0.0000000e+00   1.3271099e+00   3.8132444e+00  -5.4735601e+01
   2.0240865e+01  -2.4763189e+01   0.0000000e+00  -1.9153096e+01  -5.7219959e+00  -5.1073013e+01
   2.0227752e+01  -2.4892218e+01   0.0000000e+00  -1.1634824e+01   2.6831666e+01  -8.5726082e+00
   2.0223573e+01  -2.5021738e+01   0.0000000e+00   5.0811651e+00   9.8209766e+01  -1.1677788e+01
   2.0228372e+01  -2.5151242e+01   0.0000000e+00  -1.9373709e+01   1.4501025e+02   1.2765820e+01
   2.0242159e+01  -2.5280216e+01   0.0000000e+00   1.7229805e+01   1.5001138e+02   3.3632371e+01
   2.0264908e+01  -2.5408150e+01   0.0000000e+00  -3.5266504e+00   1.4657859e+02  -5.6831994e+00
   2.0296556e+01  -2.5534537e+01   0.0000000e+00  -6.9617321e+01   1.0388321e+02   7.3280076e+01
   2.0337006e+01  -2.5658872e+01   0.0000000e+00   6.0709225e+00   2.2918259e+01   1.7130926e+02
   2.0386124e+01  -2.5780658e+01   0.0000000e+00   1.3189674e+02  -5.2007734e+01   1.0366063e+02
   2.0443739e+01  -2.5899405e+01   0.0000000e+00   1.3262549e+02  -9.0856327e+01  -6.9026869e+01
   2.0509646e+01  -2.6014637e+01   0.0000000e+00  -1.7926606e+00  -7.3463069e+01  -1.2809223e+02
   2.0583602e+01  -2.6125888e+01   0.0000000e+00  -4.7545067e+01  -7.4001791e+01  -9.7425308e+00
   2.0665331e+01  -2.6232708e+01   0.0000000e+00   7.8765608e+01  -1.4150440e+02   1.2084396e+01
   2.0754524e+01  -2.6334661e+01   0.0000000e+00   1.4561177e+02  -1.5925461e+02  -1.7555868e+02
   2.0850836e+01  -2.6431334e+01   0.0000000e+00   4.2061785e+01  -6.9322950e+01  -3.0296934e+02
   2.0953892e+01  -2.6522331e+01   0.0000000e+00  -6.7016833e+01  -1.3405417e+01  -2.4770765e+02
   2.1063287e+01  -2.6607279e+01   0.0000000e+00  -1.0366836e+02  -9.0161964e+00  -1.9939696e+02
   2.1178586e+01  -2.6685829e+01   0.0000000e+00  -1.3108140e+02   5.2932204e+01  -1.5764636e+02
   2.1299326e+01  -2.6757658e+01   0.0000000e+00  -1.1241014e+02   8.5476060e+01  -4.4814841e+01
   2.1425020e+01  -2.6822469e+01   0.0000000e+00  -5.0735374e+01   4.1974694e+01   6.8048613e+00
   2.1555157e+01  -2.6879996e+01   0.0000000e+00  -2.2183272e+01   1.7332007e+01  -9.3058591e+00
   2.1689206e+01  -2.6929998e+01   0.0000000e+00  -1.5222454e+01   5.1760638e+00  -1.9724949e+01
   2.1826617e+01  -2.6972270e+01   0.0000000e+00  -1.6877850e+01   6.3019634e+00  -3.1756551e+01
   2.1966823e+01  -2.7006635e+01   0.0000000e+00  -3.1965603e+01   1.1087794e+01  -1.1803685e+01
   2.2109244e+01  -2.7032950e+01   0.0000000e+00  -5.0334667e+01  -1.6881143e+01  -1.0527328e+01
   2.2253289e+01  -2.7051107e+01   0.0000000e+00  -9.3726243e+01  -1.9700076e+01  -2.6889412e+01
   2.2398361e+01  -2.7061029e+01   0.0000000e+00  -1.5780459e+02  -6.0064945e+01  -3.7047165e+01
   2.2543856e+01  -2.7062675e+01   0.0000000e+00  -1.7009025e+02  -4.2637560e+01  -1.6228951e+02
   2.2689169e+01  -2.7056037e+01   0.0000000e+00  -1.2019526e+02   1.6603297e+02  -1.2342273e+02
   2.2833694e+01  -2.7041145e+01   0.0000000e+00  -1.0835465e+02   1.3559015e+02   1.4657307e+02
   2.2976832e+01  -2.7018060e+01   0.0000000e+00  -1.0408427e+02  -9.3437606e+01   9.0712293e+01
   2.3117987e+01  -2.6986877e+01   0.0000000e+00  -3.2944979e+01  -3.5089160e+01  -9.0483101e+01
   2.3256577e+01  -2.6947727e+01   0.0000000e+00  -4.2777415e+00   4.3979122e+01  -2.3703602e+01
   2.3392029e+01  -2.6900773e+01   0.0000000e+00  -5.7563496e+00  -3.1862720e-01  -2.4767068e+00
   2.3523785e+01  -2.6846208e+01   0.0000000e+00   2.8172573e+01   8.9927304e+00  -1.9265907e+01
   2.3651306e+01  -2.6784261e+01   0.0000000e+00   3.0045165e+01  -9.6863781e+00  -2.6298115e+01
   2.3774074e+01  -2.6715185e+01   0.0000000e+00   2.0986514e+01   1.1373962e+01  -6.8234762e+01
   2.3891591e+01  -2.6639268e+01   0.0000000e+00   5.1526966e+00   7.0560232e+01  -2.6193588e+01
   2.4003384e+01  -2.6556821e+01   0.0000000e+00  -3.6180801e+01   6.9023112e+01   2.7973007e+01
   2.4109009e+01  -2.6468184e+01   0.0000000e+00  -5.9705614e+01   4.8464285e+01   2.1098909e+01
   2.4208047e+01  -2.6373721e+01   0.0000000e+00  -4.4138091e+01   4.2920269e+01  -5.6847888e+00
   2.4300111e+01  -2.6273816e+01   0.0000000e+00  -1.1117832e+00   3.6644979e+01  -8.8963637e+00
   2.4384844e+01  -2.6168879e+01   0.0000000e+00   3.6495945e+01   4.2165823e+00   2.3634918e+00
   2.4461924e+01  -2.6059335e+01   0.0000000e+00   9.5024073e+01  -2.0312921e+01   1.4227420e+01
   2.4531059e+01  -2.5945630e+01   0.0000000e+00   1.1160558e+02  -6.4900672e+00   1.0804086e+02
   2.4591995e+01  -2.5828222e+01   0.0000000e+00  -6.2073909e+01   4.4864436e+01   1.3688441e+02
   2.4644510e+01  -2.5707585e+01   0.0000000e+00  -1.7701497e+02   1.6889019e+02  -5.9271721e+01
   2.4688422e+01  -2.5584204e+01   0.0000000e+00  -1.8944784e+01   2.7300658e+02  -1.2863062e+02
   2.4723581e+01  -2.5458573e+01   0.0000000e+00   6.4849446e+01   2.3772491e+02   6.2857282e+01
   2.4749874e+01  -2.5331192e+01   0.0000000e+00  -5.1239635e+01   1.4259704e+02   1.6950179e+02
   2.4767226e+01  -2.5202570e+01   0.0000000e+00  -1.7020149e+02   4.4877577e+01   1.1489192e+02
   2.4775596e+01  -2.5073216e+01   0.0000000e+00  -2.1628795e+02  -3.8453735e+01  -1.9390350e+01
   2.4774981e+01  -2.4943641e+01   0.0000000e+00  -1.5515724e+02  -6.0123148e+00  -1.2908396e+02
   2.4765409e+01  -2.4814356e+01   0.0000000e+00  -5.6631553e+01   8.3013198e+01  -1.5095631e+02
   2.4746948e+01  -2.4685869e+01   0.0000000e+00   3.0500793e+01   1.0517042e+02  -1.3384022e+02
   2.4719697e+01  -2.4558683e+01   0.0000000e+00   7.9904226e+01   1.0272713e+02  -9.3299648e+01
   2.4683788e+01  -2.4433295e+01   0.0000000e+00   8.4920794e+01   9.2027719e+01  -5.4567531e+01
   2.4639386e+01  -2.4310193e+01   0.0000000e+00   5.8702506e+01   5.5642777e+01  -1.7017641e+01
   2.4586688e+01  -2.4189855e+01   0.0000000e+00   4.1476652e+00   3.6305990e+01  -7.4375909e+00
   2.4525921e+01  -2.4072746e+01   0.0000000e+00  -3.7265423e+01   2.3266785e+01  -4.3118835e+01
   2.4457340e+01  -2.3959319e+01   0.0000000e+00  -2.8908758e+01  -1.4106567e+01  -8.3094238e+01
   2.4381229e+01  -2.3850011e+01   0.0000000e+00   2.4127242e+01  -3.3142398e+01  -9.1924749e+01
   2.4297899e+01  -2.3745241e+01   0.0000000e+00   8.2886748e+01  -3.2535898e+01  -6.5878695e+01
   2.4207686e+01  -2.3645412e+01   0.0000000e+00   9.8477826e+01  -3.0561348e+01   4.1092053e+00
   2.4110948e+01  -2.3550906e+01   0.0000000e+00   5.0951911e+01  -1.2989391e+01   5.6693373e+01
   2.4008069e+01  -2.3462082e+01   0.0000000e+00  -2.2259451e+00  -2.9532228e+00   4.9900987e+01
   2.3899452e+01  -2.3379281e+01   0.0000000e+00  -2.2178942e+01   6.9943083e-01   1.8532014e+01
   2.3785519e+01  -2.3302816e+01   0.0000000e+00  -5.7964047e+00  -7.1479688e-01  -1.4741359e+01
   2.3666711e+01  -2.3232978e+01   0.0000000e+00   2.0720273e+01  -1.9616625e+01  -1.6842279e+01
   2.3543485e+01  -2.3170032e+01   0.0000000e+00   3.1897125e+01  -4.4132544e+01   4.9640372e+00
   2.3416313e+01  -2.3114217e+01   0.0000000e+00   3.6962809e+01  -5.8876182e+01   4.0124658e+01
   2.3285681e+01  -2.3065743e+01   0.0000000e+00   3.7814689e+01  -2.0711452e+01   5.6859254e+01
   2.3152084e+01  -2.3024795e+01   0.0000000e+00   5.7873345e+01   1.2239576e+01  -1.6777399e+01
   2.3016028e+01  -2.2991526e+01   0.0000000e+00   8.4051783e+01  -5.3669064e+01  -6.7009339e+01
   2.2878028e+01  -2.2966062e+01   0.0000000e+00   5.5320952e+01  -1.0908869e+02   1.1598738e+01
   2.2738605e+01  -2.2948500e+01   0.0000000e+00   2.3920421e+00  -7.2735826e+01   8.7280718e+01
   2.2598284e+01  -2.2938904e+01   0.0000000e+00  -2.2104892e+01  -3.2147455e+01   9.7902281e+01
   2.2457593e+01  -2.2937313e+01   0.0000000e+00  -2.1905303e+01   9.0143716e+00   1.0297157e+02
   2.2317061e+01  -2.2943731e+01   0.0000000e+00  -2.8584868e+00   6.8016540e+01   5.7496406e+01
   2.2177218e+01  -2.2958135e+01   0.0000000e+00   2.6710558e+01   4.9814904e+01  -2.3156362e+01
   2.2038590e+01  -2.2980470e+01   0.0000000e+00   6.0744763e+01  -1.0883616e+01  -2.3785140e+01
   2.1901700e+01  -2.3010651e+01   0.0000000e+00   8.4340626e+01  -1.1530152e+01  -2.6852266e+01
   2.1767065e+01  -2.3048566e+01   0.0000000e+00   4.9319726e+01  -6.0139439e+01  -9.1011217e+01
   2.1635195e+01  -2.3094070e+01   0.0000000e+00   8.0788758e+00  -1.5000373e+02  -4.6431348e+01
   2.1506590e+01  -2.3146993e+01   0.0000000e+00   4.8397181e+01  -1.2401095e+02   4.4558152e+01
   2.1381739e+01  -2.3207133e+01   0.0000000e+00   1.1216472e+02  -5.1344986e+01   3.5670215e+01
   2.1261121e+01  -2.3274263e+01   0.0000000e+00   1.4266524e+02  -8.7394148e+00  -1.8981246e+01
   2.0628649e+01  -2.3624577e+01   0.0000000e+00   8.1395772e+01  -8.4631080e+01  -5.9555575e+01
   2.0542963e+01  -2.3726459e+01   0.0000000e+00   1.0307090e+02  -6.4186726e+01  -3.4781812e+01
   2.0463818e+01  -2.3832726e+01   0.0000000e+00   1.4184116e+02  -1.5751668e+01  -4.6167003e+01
   2.0391495e+01  -2.3943022e+01   0.0000000e+00   1.6616628e+02   4.7693184e+01  -1.2606700e+02
   2.0326254e+01  -2.4056978e+01   0.0000000e+00   1.1818285e+02   7.8524989e+01  -2.3932824e+02
   2.0268331e+01  -2.4174209e+01   0.0000000e+00   1.5474053e+01   5.7733667e+01  -2.8148872e+02
   2.0217943e+01  -2.4294321e+01   0.0000000e+00  -5.5542957e+01   1.9534572e+01  -2.2894706e+02
   2.0175281e+01  -2.4416908e+01   0.0000000e+00  -6.2607913e+01  -5.4170159e+00  -1.4910531e+02
   2.0140511e+01  -2.4541555e+01   0.0000000e+00  -3.0507219e+01  -2.1405458e+01  -9.5164707e+01
   2.0113776e+01  -2.4667837e+01   0.0000000e+00  -7.2739638e+00  -3.3396846e+01  -7.9087131e+01
   2.0095189e+01  -2.4795325e+01   0.0000000e+00   4.2868951e+00  -2.2104404e+01  -4.7750350e+01
   2.0084841e+01  -2.4923582e+01   0.0000000e+00   6.9999467e+01   3.0247842e+01  -5.4033705e+01
   2.0082791e+01  -2.5052169e+01   0.0000000e+00   6.5323134e+01   1.0491128e+02  -1.4703392e+02
   2.0089074e+01  -2.5180644e+01   0.0000000e+00  -8.9425901e+00   1.4410101e+02  -1.3450435e+02
   2.0103693e+01  -2.5308563e+01   0.0000000e+00   1.5360384e+01   1.3498153e+02  -1.0820882e+02
   2.0126625e+01  -2.5435483e+01   0.0000000e+00  -3.4702759e+01   1.3216142e+02  -1.4241318e+02
   2.0157816e+01  -2.5560964e+01   0.0000000e+00  -1.1501100e+02   1.2728567e+02  -1.3571680e+01
   2.0197183e+01  -2.5684569e+01   0.0000000e+00  -2.7407626e+01   8.1972215e+01   1.2978075e+02
   2.0244615e+01  -2.5805866e+01   0.0000000e+00   8.5820473e+01   2.3864109e+00   1.0374273e+02
   2.0299970e+01  -2.5924428e+01   0.0000000e+00   9.2894526e+01  -7.3557142e+01  -1.6727683e+01
   2.0363078e+01  -2.6039840e+01   0.0000000e+00  -8.1255051e+00  -8.7007824e+01  -8.4653284e+01
   2.0433738e+01  -2.6151694e+01   0.0000000e+00  -7.1937555e+01  -7.6554085e+01  -6.5677848e+00
   2.0511723e+01  -2.6259594e+01   0.0000000e+00   1.0481757e+01  -1.3107770e+02   5.7859723e+01
   2.0596777e+01  -2.6363157e+01   0.0000000e+00   1.0138012e+02  -2.1179581e+02  -5.7086949e+01
   2.0688616e+01  -2.6462014e+01   0.0000000e+00   5.0087411e+01  -1.8877265e+02  -2.3618188e+02
   2.0786929e+01  -2.6555812e+01   0.0000000e+00  -7.2672968e+01  -7.6894811e+01  -2.5077435e+02
   2.0891382e+01  -2.6644216e+01   0.0000000e+00  -1.0865376e+02  -2.3889627e+01  -1.4837911e+02
   2.1001613e+01  -2.6726907e+01   0.0000000e+00  -9.5915432e+01  -8.2259915e+00  -1.1788341e+02
   2.1117239e+01  -2.6803589e+01   0.0000000e+00  -1.0927511e+02   4.4894155e+01  -9.2737157e+01
   2.1237854e+01  -2.6873984e+01   0.0000000e+00  -8.7691903e+01   5.5937116e+01  -2.0951846e+01
   2.1363032e+01  -2.6937839e+01   0.0000000e+00  -4.4228409e+01   2.2110418e+01  -4.3248085e+00
   2.1492327e+01  -2.6994921e+01   0.0000000e+00  -3.5544221e+01   1.2090028e+01  -1.6554627e+01
   2.1625278e+01  -2.7045024e+01   0.0000000e+00  -3.8443936e+01  -1.3010328e-02  -1.6979812e+01
   2.1761406e+01  -2.7087966e+01   0.0000000e+00  -3.9274292e+01  -5.3944457e+00  -3.8688361e+01
   2.1900221e+01  -2.7123590e+01   0.0000000e+00  -4.0384239e+01   1.7224065e+01  -3.7095435e+01
   2.2041219e+01  -2.7151766e+01   0.0000000e+00  -4.6972335e+01   1.3409696e+01  -1.5192675e+01
   2.2183888e+01  -2.7172392e+01   0.0000000e+00  -7.2045410e+01   2.0274634e+01  -1.1535256e+01
   2.2327710e+01  -2.7185392e+01   0.0000000e+00  -1.0325233e+02   2.6446085e+01   5.0394337e+01
   2.2472160e+01  -2.7190719e+01   0.0000000e+00  -1.3986910e+02  -5.5203646e+01   4.4045451e+01
   2.2616712e+01  -2.7188354e+01   0.0000000e+00  -1.4703024e+02   5.9150384e+00  -1.0492781e+02
   2.2760838e+01  -2.7178304e+01   0.0000000e+00  -1.0988123e+02   1.7397581e+02  -2.7328098e+01
   2.2904013e+01  -2.7160607e+01   0.0000000e+00  -1.1780609e+02   2.7909377e+01   1.2561966e+02
   2.3045716e+01  -2.7135328e+01   0.0000000e+00  -1.4096796e+02  -1.3286945e+02  -5.8810647e+01
   2.3185431e+01  -2.7102558e+01   0.0000000e+00  -8.6442439e+01  -3.7464805e+00  -1.7671548e+02
   2.3322653e+01  -2.7062417e+01   0.0000000e+00  -3.3721430e+01   2.0973207e+01  -7.4151366e+01
   2.3456885e+01  -2.7015051e+01   0.0000000e+00  -1.9030761e+00  -3.6277107e+01  -9.8450892e+01
   2.3587643e+01  -2.6960633e+01   0.0000000e+00   2.4044492e+01   1.8747333e+01  -1.1717803e+02
   2.3714460e+01  -2.6899360e+01   0.0000000e+00  -5.7460586e+00   3.7630256e+01  -8.1106376e+01
   2.3836884e+01  -2.6831455e+01   0.0000000e+00  -1.7369644e+01   5.5682344e+01  -8.3416803e+01
   2.3954480e+01  -2.6757162e+01   0.0000000e+00   1.1608143e+01   8.0142106e+01  -2.4251724e+01
   2.4066835e+01  -2.6676751e+01   0.0000000e+00   1.0274374e+01   4.7577381e+01   5.1694991e+01
   2.4173557e+01  -2.6590510e+01   0.0000000e+00  -1.1373289e+01  -1.0915781e+00   6.3637560e+01
   2.4274276e+01  -2.6498750e+01   0.0000000e+00  -1.2726850e+01  -2.6955888e+01   2.8628402e+01
   2.4368646e+01  -2.6401800e+01   0.0000000e+00   3.2131340e+00  -2.8241214e+01  -8.7894497e+00
   2.4456347e+01  -2.6300007e+01   0.0000000e+00   1.5737505e+01  -4.3080038e+01  -2.9688813e+01
   2.4537086e+01  -2.6193732e+01   0.0000000e+00   3.5370109e+01  -7.9336270e+01  -7.7836855e+01
   2.4610595e+01  -2.6083355e+01   0.0000000e+00   1.2407617e+02  -7.5905001e+01  -1.1286166e+02
   2.4676637e+01  -2.5969265e+01   0.0000000e+00   1.9055588e+02  -1.4357123e+01   1.7814908e+00
   2.4734999e+01  -2.5851867e+01   0.0000000e+00   7.6585797e+01   6.7654479e+01   1.6018579e+02
   2.4785500e+01  -2.5731573e+01   0.0000000e+00  -5.3321120e+01   1.3194278e+02   1.6510712e+02
   2.4827988e+01  -2.5608807e+01   0.0000000e+00  -2.7061487e+00   1.4632971e+02   1.3906773e+02
   2.4862338e+01  -2.5483997e+01   0.0000000e+00   3.2257725e+01   1.3228501e+02   2.0782918e+02
   2.4888458e+01  -2.5357578e+01   0.0000000e+00  -8.0138664e+01   1.1676211e+02   2.3807806e+02
   2.4906283e+01  -2.5229992e+01   0.0000000e+00  -2.3148283e+02   7.0549421e+01   1.4536152e+02
   2.4915777e+01  -2.5101678e+01   0.0000000e+00  -2.6873082e+02   9.6380453e+00  -6.7839244e+01
   2.4916933e+01  -2.4973082e+01   0.0000000e+00  -1.2863612e+02   5.3485645e+00  -1.9295032e+02
   2.4909775e+01  -2.4844645e+01   0.0000000e+00  -2.8981497e+01   3.8020454e+01  -1.4811993e+02
   2.4894352e+01  -2.4716810e+01   0.0000000e+00   1.0800946e+01   5.0863050e+01  -1.2839816e+02
   2.4870742e+01  -2.4590012e+01   0.0000000e+00   8.2341355e+01   6.5714196e+01  -8.5156328e+01
   2.4839050e+01  -2.4464685e+01   0.0000000e+00   8.1991801e+01   8.8371759e+01  -5.8011491e+00
   2.4799409e+01  -2.4341255e+01   0.0000000e+00   3.7987527e+01   7.9651089e+01   7.5651333e+00
   2.4751974e+01  -2.4220141e+01   0.0000000e+00   1.8994574e+01   6.2853618e+01  -2.7850350e+00
   2.4696929e+01  -2.4101753e+01   0.0000000e+00  -1.8856365e+01   7.2577700e+01  -8.5940612e+00
   2.4634479e+01  -2.3986490e+01   0.0000000e+00  -7.3488295e+01   5.5189605e+01  -8.1746708e+01
   2.4564853e+01  -2.3874741e+01   0.0000000e+00  -2.8876329e+01  -1.6939586e+01  -1.6395940e+02
   2.4488303e+01  -2.3766879e+01   0.0000000e+00   7.2967863e+01  -5.0988896e+01  -1.2341165e+02
   2.4405102e+01  -2.3663268e+01   0.0000000e+00   1.1456781e+02  -3.4900912e+01  -2.7290390e+01
   2.4315542e+01  -2.3564252e+01   0.0000000e+00   8.5640070e+01  -2.0793068e+01   5.2202538e+01
   2.4219935e+01  -2.3470163e+01   0.0000000e+00   1.3382278e+01  -5.7829455e+00   7.1509773e+01
   2.4118612e+01  -2.3381312e+01   0.0000000e+00  -3.3713577e+01  -8.4433351e-01   2.3015946e+01
   2.4011919e+01  -2.3297997e+01   0.0000000e+00  -3.1388707e+01  -1.0505690e+01  -2.6309559e+01
   2.3900219e+01  -2.3220492e+01   0.0000000e+00  -7.3324634e+00  -1.4650330e+01  -3.6947821e+01
   2.3783890e+01  -2.3149056e+01   0.0000000e+00  -1.1057280e+01  -1.8302911e+01  -2.8296656e+01
   2.3663323e+01  -2.3083923e+01   0.0000000e+00  -3.8892456e+01  -4.7687545e+01  -2.6704423e+01
   2.3538921e+01  -2.3025309e+01   0.0000000e+00  -4.3471089e+01  -8.7205792e+01  -1.0527309e+01
   2.3411099e+01  -2.2973408e+01   0.0000000e+00  -4.1896914e+01  -9.4724501e+01   3.5413423e+01
   2.3280279e+01  -2.2928390e+01   0.0000000e+00  -3.1599199e+01  -7.0621002e+01   5.9693875e+01
   2.3146896e+01  -2.2890403e+01   0.0000000e+00   3.3462677e+01  -5.8935202e+01   5.5021752e+01
   2.3011388e+01  -2.2859574e+01   0.0000000e+00   7.8043267e+01  -5.4464212e+01   5.8949776e+01
   2.2874203e+01  -2.2836002e+01   0.0000000e+00   3.7029055e+01  -4.5197840e+01   6.0373871e+01
   2.2735790e+01  -2.2819766e+01   0.0000000e+00  -1.2933229e+01  -3.3998446e+01   5.3421867e+01
   2.2596604e+01  -2.2810919e+01   0.0000000e+00  -2.6963528e+01  -2.7422695e+01   5.3018310e+01
   2.2457102e+01  -2.2809489e+01   0.0000000e+00  -2.0436188e+01  -3.8939014e+00   6.8312303e+01
   2.2317740e+01  -2.2815482e+01   0.0000000e+00  -4.6387268e-01   4.1419617e+01   4.8684570e+01
   2.2178975e+01  -2.2828878e+01   0.0000000e+00   1.5153019e+01   3.2714476e+01  -3.6428632e+00
   2.2041264e+01  -2.2849633e+01   0.0000000e+00   1.4598657e+01  -2.1225355e+01   4.9363881e+00
   2.1905057e+01  -2.2877679e+01   0.0000000e+00   2.8344655e+01  -1.2466067e+01   3.0196835e+01
   2.1770803e+01  -2.2912923e+01   0.0000000e+00   4.4739765e+01  -2.1142884e+01  -4.9885967e+01
   2.1638945e+01  -2.2955249e+01   0.0000000e+00   3.2801418e+01  -1.4711431e+02  -7.6573793e+01
   2.1509917e+01  -2.3004519e+01   0.0000000e+00   5.2811009e+01  -2.0748322e+02   4.9955458e+01
   2.1384148e+01  -2.3060570e+01   0.0000000e+00   1.2241415e+02  -1.3875192e+02   1.3419309e+02
   2.1262056e+01  -2.3123216e+01   0.0000000e+00   1.7516753e+02  -6.6034657e+01   1.1530702e+02
   2.1144048e+01  -2.3192253e+01   0.0000000e+00   1.9682199e+02  -3.0021675e+01   6.0683778e+01
   2.1030521e+01  -2.3267450e+01   0.0000000e+00   2.0597369e+02  -2.4135309e+01  -6.7952600e+00
   2.0921856e+01  -2.3348559e+01   0.0000000e+00   1.8794023e+02  -3.4427090e+01  -7.5649688e+01
   2.0818423e+01  -2.3435312e+01   0.0000000e+00   1.3494373e+02  -5.5698557e+01  -1.1500279e+02
   2.0720575e+01  -2.3527420e+01   0.0000000e+00   8.8387368e+01  -7.9775687e+01  -9.9420270e+01
   2.0199822e+01  -2.4001405e+01   0.0000000e+00   1.8497311e+02   6.2532452e+00  -2.4771540e+02
   2.0141510e+01  -2.4118786e+01   0.0000000e+00   6.4926595e+01  -3.7733594e+01  -3.0816555e+02
   2.0090327e+01  -2.4238925e+01   0.0000000e+00  -2.9662729e+01  -8.3340009e+01  -2.5242631e+02
   2.0046449e+01  -2.4361457e+01   0.0000000e+00  -4.9239008e+01  -1.0238235e+02  -1.6519530e+02
   2.0010028e+01  -2.4486012e+01   0.0000000e+00  -3.1628218e+01  -1.0129704e+02  -1.0096572e+02
   1.9981199e+01  -2.4612209e+01   0.0000000e+00  -3.0214422e+00  -9.5878428e+01  -6.2863840e+01
   1.9960072e+01  -2.4739664e+01   0.0000000e+00   2.1315146e+01  -7.8862184e+01  -3.6286181e+01
   1.9946734e+01  -2.4867988e+01   0.0000000e+00   8.9243671e+01  -4.4771466e+01  -2.9163639e+01
   1.9941251e+01  -2.4996785e+01   0.0000000e+00   1.4783976e+02  -6.3122550e+00  -1.4823341e+02
   1.9943665e+01  -2.5125660e+01   0.0000000e+00   4.6684241e+01   3.5291366e+01  -2.4986610e+02
   1.9953993e+01  -2.5254214e+01   0.0000000e+00  -2.2668693e+01   5.2186179e+01  -1.8605229e+02
   1.9972227e+01  -2.5382048e+01   0.0000000e+00  -1.1412559e+01   4.0334137e+01  -1.7989937e+02
   1.9998337e+01  -2.5508767e+01   0.0000000e+00  -9.3731822e+01   5.9263469e+01  -1.5698645e+02
   2.0032267e+01  -2.5633974e+01   0.0000000e+00  -9.8682241e+01   9.2354431e+01  -1.1869928e+01
   2.0073934e+01  -2.5757277e+01   0.0000000e+00  -6.0844647e+00   8.2609374e+01   5.3315732e+01
   2.0123232e+01  -2.5878290e+01   0.0000000e+00   3.6284723e+01   1.8453375e+01   3.6884438e+01
   2.0180029e+01  -2.5996631e+01   0.0000000e+00   2.3456076e+01  -5.0781460e+01  -6.9463734e+00
   2.0244169e+01  -2.6111927e+01   0.0000000e+00  -4.6830815e+01  -6.4016851e+01  -1.5285521e+01
   2.0315471e+01  -2.6223812e+01   0.0000000e+00  -7.5420392e+01  -6.9573212e+01   6.6854876e+01
   2.0393729e+01  -2.6331930e+01   0.0000000e+00  -5.7006116e+00  -1.3181673e+02   1.1637286e+02
   2.0478713e+01  -2.6435937e+01   0.0000000e+00   6.7807843e+01  -2.1351265e+02   3.6248453e+01
   2.0570170e+01  -2.6535500e+01   0.0000000e+00   5.1000865e+01  -2.0739389e+02  -1.1480367e+02
   2.0667823e+01  -2.6630299e+01   0.0000000e+00  -3.1984246e+01  -9.9845686e+01  -1.6960340e+02
   2.0771375e+01  -2.6720030e+01   0.0000000e+00  -5.9666108e+01  -2.2205157e+01  -1.1884698e+02
   2.0880505e+01  -2.6804403e+01   0.0000000e+00  -5.0685540e+01  -1.5829969e+00  -1.1273914e+02
   2.0994874e+01  -2.6883145e+01   0.0000000e+00  -8.4398514e+01   3.4873979e+01  -1.1194785e+02
   2.1114122e+01  -2.6956002e+01   0.0000000e+00  -9.5365621e+01   4.7675228e+01  -4.4313393e+01
   2.1237872e+01  -2.7022735e+01   0.0000000e+00  -5.7166598e+01   1.6990732e+01  -6.7234990e+00
   2.1365730e+01  -2.7083129e+01   0.0000000e+00  -3.5675161e+01   9.5515055e+00  -1.4367863e+01
   2.1497286e+01  -2.7136986e+01   0.0000000e+00  -3.7205595e+01   1.7781955e+01  -1.9847595e+00
   2.1632116e+01  -2.7184130e+01   0.0000000e+00  -4.5969249e+01   4.0438077e+00   9.4419755e+00
   2.1769783e+01  -2.7224407e+01   0.0000000e+00  -6.0320153e+01  -5.1134303e+00  -6.5383319e+00
   2.1909840e+01  -2.7257685e+01   0.0000000e+00  -6.0602500e+01   9.9419594e+00  -1.6656182e+01
   2.2051831e+01  -2.7283854e+01   0.0000000e+00  -6.1143190e+01   2.4156344e+01  -3.7503723e+00
   2.2195291e+01  -2.7302829e+01   0.0000000e+00  -6.6778441e+01   3.4123140e+01   1.5594505e+01
   2.2339751e+01  -2.7314548e+01   0.0000000e+00  -4.9606563e+01   3.1814194e+01   6.0037594e+01
   2.2484736e+01  -2.7318972e+01   0.0000000e+00  -5.2948153e+01  -2.6278158e+01   5.6253288e+01
   2.2629772e+01  -2.7316086e+01   0.0000000e+00  -9.3879078e+01   3.3086280e+01  -4.5718487e+01
   2.2774382e+01  -2.7305899e+01   0.0000000e+00  -1.3704685e+02   1.9103464e+02   3.3274481e+01
   2.2918092e+01  -2.7288447e+01   0.0000000e+00  -2.0294117e+02   7.7935286e+01   1.9552886e+02
   2.3060430e+01  -2.7263784e+01   0.0000000e+00  -2.6149855e+02  -1.0462005e+02   6.9583496e+01
   2.3200932e+01  -2.7231994e+01   0.0000000e+00  -2.1620143e+02  -3.9760032e+01  -8.2760140e+01
   2.3339140e+01  -2.7193180e+01   0.0000000e+00  -1.3416409e+02  -4.3502448e+00  -5.9618283e+01
   2.3474603e+01  -2.7147468e+01   0.0000000e+00  -9.4567183e+01  -4.4185434e+01  -1.2804930e+02
   2.3606883e+01  -2.7095010e+01   0.0000000e+00  -4.4768897e+01   4.0556096e+01  -1.7951949e+02
   2.3735554e+01  -2.7035976e+01   0.0000000e+00  -2.5583516e+01   8.6333919e+01  -8.5420211e+01
   2.3860202e+01  -2.6970559e+01   0.0000000e+00  -3.8281017e+01   6.0147620e+01  -3.5198704e+01
   2.3980429e+01  -2.6898972e+01   0.0000000e+00  -1.8988577e+01   5.1274742e+01  -2.4287729e+01
   2.4095855e+01  -2.6821447e+01   0.0000000e+00   1.3831868e+01   2.9102725e+01   5.9364899e+00
   2.4206117e+01  -2.6738237e+01   0.0000000e+00   1.7137645e+01  -2.3463224e+01   2.7812936e+01
   2.4310869e+01  -2.6649610e+01   0.0000000e+00   1.3912776e+01  -6.9629013e+01  -1.1338615e+01
   2.4409789e+01  -2.6555852e+01   0.0000000e+00   2.0669227e+01  -5.0268470e+01  -6.5908483e+01
   2.4502573e+01  -2.6457265e+01   0.0000000e+00   5.6609254e+00  -1.6713282e+01  -8.3465277e+01
   2.4588941e+01  -2.6354166e+01   0.0000000e+00  -2.3235322e+01  -2.3445944e+01  -1.0972943e+02
   2.4668634e+01  -2.6246885e+01   0.0000000e+00  -2.7329942e+01  -3.4395653e+01  -1.9311482e+02
   2.4741417e+01  -2.6135763e+01   0.0000000e+00   7.1701438e+01  -1.1259803e+00  -2.5830960e+02
   2.4807080e+01  -2.6021155e+01   0.0000000e+00   2.0969199e+02   5.2586335e+01  -1.2717090e+02
   2.4865436e+01  -2.5903424e+01   0.0000000e+00   1.7348098e+02   5.7169828e+01   1.2880282e+02
   2.4916324e+01  -2.5782941e+01   0.0000000e+00   5.7164543e+00  -6.1951951e+00   1.9559007e+02
   2.4959606e+01  -2.5660088e+01   0.0000000e+00   1.1343305e+01  -5.0902736e+01   8.7029448e+01
   2.4995171e+01  -2.5535249e+01   0.0000000e+00   1.1215908e+02   2.6274629e+00   1.4350849e+02
   2.5022932e+01  -2.5408816e+01   0.0000000e+00   9.0636751e+00   7.2051783e+01   2.9687495e+02
   2.5042827e+01  -2.5281183e+01   0.0000000e+00  -2.1807150e+02   5.7786380e+01   2.6290379e+02
   2.5054820e+01  -2.5152747e+01   0.0000000e+00  -3.1873079e+02   1.9884972e+01   8.5461907e+00
   2.5058898e+01  -2.5023907e+01   0.0000000e+00  -1.7867388e+02   3.6957668e+01  -2.0900460e+02
   2.5055074e+01  -2.4895061e+01   0.0000000e+00  -2.9786192e+01   6.4830882e+01  -1.9325453e+02
   2.5043384e+01  -2.4766605e+01   0.0000000e+00  -6.7123062e+00   6.6448200e+01  -1.5989286e+02
   2.5023889e+01  -2.4638934e+01   0.0000000e+00   6.6789887e+01   5.9168399e+01  -1.4557279e+02
   2.4996672e+01  -2.4512440e+01   0.0000000e+00   1.0735679e+02   6.1262147e+01  -2.9371326e+01
   2.4961839e+01  -2.4387508e+01   0.0000000e+00   3.9734800e+01   6.5735236e+01   3.1519669e+01
   2.4919517e+01  -2.4264519e+01   0.0000000e+00   1.0274156e+01   5.9014354e+01   2.4282007e+00
   2.4869858e+01  -2.4143846e+01   0.0000000e+00   2.5878365e+01   6.4001165e+01   1.7206485e+01
   2.4813030e+01  -2.4025855e+01   0.0000000e+00  -3.7810571e+01   1.0057098e+02   3.7163336e+01
   2.4749225e+01  -2.3910902e+01   0.0000000e+00  -1.0237158e+02   9.9360496e+01  -9.6044786e+01
   2.4678653e+01  -2.3799333e+01   0.0000000e+00   8.0934273e+00   1.9499517e+01  -2.0936717e+02
   2.4601542e+01  -2.3691484e+01   0.0000000e+00   1.2192167e+02  -3.5703980e+01  -1.1290262e+02
   2.4518139e+01  -2.3587677e+01   0.0000000e+00   1.0228390e+02  -4.0819089e+01   1.9530827e+01
   2.4428707e+01  -2.3488223e+01   0.0000000e+00   2.5597910e+01  -3.7189813e+01   7.9238690e+01
   2.4333526e+01  -2.3393420e+01   0.0000000e+00  -4.0591211e+01  -2.8195202e+01   5.5732835e+01
   2.4232891e+01  -2.3303550e+01   0.0000000e+00  -3.8427976e+01  -1.3140469e+01  -6.8843266e+00
   2.4127110e+01  -2.3218880e+01   0.0000000e+00   1.5339461e+00  -1.4124052e+00  -5.1911767e+01
   2.4016507e+01  -2.3139661e+01   0.0000000e+00   3.6559020e+01  -1.6332081e+00  -4.5021870e+01
   2.3901417e+01  -2.3066128e+01   0.0000000e+00   1.3096148e+01   2.6649148e+01  -2.9885089e+01
   2.3782186e+01  -2.2998499e+01   0.0000000e+00  -4.5809241e+01   2.2021051e+01  -9.7971977e+01
   2.3659173e+01  -2.2936974e+01   0.0000000e+00  -4.8459623e+01  -5.1363750e+01  -1.4717173e+02
   2.3532744e+01  -2.2881734e+01   0.0000000e+00  -3.4732702e+01  -8.6820544e+01  -1.0685667e+02
   2.3403276e+01  -2.2832943e+01   0.0000000e+00  -6.8564462e+01  -7.9706746e+01  -8.6476018e+01
   2.3271152e+01  -2.2790743e+01   0.0000000e+00  -7.4243621e+01  -1.3073682e+02  -7.3249413e+01
   2.3136763e+01  -2.2755261e+01   0.0000000e+00  -9.4126931e+00  -1.5336948e+02   3.9887611e+01
   2.3000505e+01  -2.2726598e+01   0.0000000e+00   2.6656667e+01  -6.0871782e+01   1.0844869e+02
   2.2862778e+01  -2.2704841e+01   0.0000000e+00   1.2033357e+01  -6.5741591e+00   6.0221464e+01
   2.2723987e+01  -2.2690053e+01   0.0000000e+00  -1.8922356e-01  -1.4787270e+01   2.6483379e+01
   2.2584540e+01  -2.2682277e+01   0.0000000e+00  -8.0962449e+00  -2.3736542e+01   2.8854264e+01
   2.2444845e+01  -2.2681537e+01   0.0000000e+00  -6.9387222e+00  -1.2936716e+01   5.1664825e+01
   2.2305312e+01  -2.2687833e+01   0.0000000e+00   4.4376341e+00   2.8680277e+01   5.0435160e+01
   2.2166349e+01  -2.2701149e+01   0.0000000e+00  -4.1262959e-01   3.9655146e+01   3.7005200e+00
   2.2028364e+01  -2.2721445e+01   0.0000000e+00  -2.4842118e+01  -4.5071304e+00  -1.8287648e+01
   2.1891764e+01  -2.2748660e+01   0.0000000e+00  -2.6591401e+01  -2.1389083e+01  -1.8518390e-01
   2.1756948e+01  -2.2782716e+01   0.0000000e+00   4.1813448e+00  -3.6919382e+01  -3.8410423e+01
   2.1624315e+01  -2.2823512e+01   0.0000000e+00   1.9234710e+01  -1.5441518e+02  -5.1057780e+01
   2.1494256e+01  -2.2870928e+01   0.0000000e+00   2.7527246e+01  -2.3965013e+02   7.9398470e+01
   2.1367156e+01  -2.2924823e+01   0.0000000e+00   7.5832392e+01  -1.8422284e+02   2.1002566e+02
   2.1243394e+01  -2.2985041e+01   0.0000000e+00   1.3936619e+02  -8.4311547e+01   2.2452339e+02
   2.1123337e+01  -2.3051401e+01   0.0000000e+00   1.6876830e+02  -2.2545003e+01   1.6250770e+02
   2.1007347e+01  -2.3123709e+01   0.0000000e+00   1.7421851e+02  -1.5851736e+01   9.9052563e+01
   2.0895771e+01  -2.3201751e+01   0.0000000e+00   1.9089154e+02  -2.8271097e+01   4.9968760e+01
   2.0788949e+01  -2.3285295e+01   0.0000000e+00   1.9433393e+02  -4.4190867e+01  -1.9084949e+01
   2.0687205e+01  -2.3374093e+01   0.0000000e+00   1.5360651e+02  -7.7929572e+01  -6.8059569e+01
   2.0590851e+01  -2.3467881e+01   0.0000000e+00   1.0835535e+02  -1.0473493e+02  -4.9366959e+01
   2.0500185e+01  -2.3566380e+01   0.0000000e+00   1.0090066e+02  -1.0197294e+02  -1.5314063e+00
   2.0415492e+01  -2.3669296e+01   0.0000000e+00   1.2898322e+02  -7.6360980e+01   2.8120804e+01
   2.0337036e+01  -2.3776322e+01   0.0000000e+00   1.8548449e+02  -3.1821539e+01   6.9940986e+00
   2.0265068e+01  -2.3887135e+01   0.0000000e+00   2.2878391e+02   9.0004880e+00  -1.0222335e+02
   1.9872619e+01  -2.4456908e+01   0.0000000e+00  -1.3041160e+01  -1.5141290e+02  -3.5410840e+01
   1.9843646e+01  -2.4582259e+01   0.0000000e+00   1.1992856e+01  -1.3307083e+02  -1.4264802e+00
   1.9821870e+01  -2.4708814e+01   0.0000000e+00   4.5928341e+01  -1.0828792e+02   1.3556933e+01
   1.9807371e+01  -2.4836229e+01   0.0000000e+00   9.9656176e+01  -7.6153934e+01   9.3544929e+00
   1.9800211e+01  -2.4964157e+01   0.0000000e+00   1.6593973e+02  -6.2758649e+01  -7.6275525e+01
   1.9800432e+01  -2.5092250e+01   0.0000000e+00   1.1114419e+02  -5.5840832e+01  -2.1462516e+02
   1.9808056e+01  -2.5220157e+01   0.0000000e+00  -1.0003859e+01  -2.9002228e+01  -2.1228870e+02
   1.9823087e+01  -2.5347527e+01   0.0000000e+00  -2.4855352e+01  -1.9995658e+01  -1.5471241e+02
   1.9845505e+01  -2.5474009e+01   0.0000000e+00  -4.8684101e+01  -1.1607325e+01  -1.5222050e+02
   1.9875274e+01  -2.5599254e+01   0.0000000e+00  -8.3636243e+01   3.1096529e+01  -8.7148331e+01
   1.9912332e+01  -2.5722915e+01   0.0000000e+00  -4.1343667e+01   6.2047404e+01  -3.1112629e+01
   1.9956600e+01  -2.5844648e+01   0.0000000e+00  -2.6235945e+01   5.2080868e+01  -1.7768279e+01
   2.0007978e+01  -2.5964113e+01   0.0000000e+00  -2.0926547e+01   4.1206349e+00   1.7148981e+01
   2.0066343e+01  -2.6080976e+01   0.0000000e+00  -1.2515512e+01  -3.0281541e+01   1.3785234e+01
   2.0131552e+01  -2.6194910e+01   0.0000000e+00  -4.8643245e+01  -1.6183603e+01   3.3917791e+01
   2.0203442e+01  -2.6305592e+01   0.0000000e+00  -4.6299740e+01  -1.6879527e+01   1.1957026e+02
   2.0281830e+01  -2.6412711e+01   0.0000000e+00   1.9515182e+01  -7.3506705e+01   1.6923839e+02
   2.0366512e+01  -2.6515963e+01   0.0000000e+00   9.3741621e+01  -1.5486753e+02   1.1038521e+02
   2.0457264e+01  -2.6615054e+01   0.0000000e+00   1.0631398e+02  -1.7022492e+02  -4.7712268e+01
   2.0553845e+01  -2.6709702e+01   0.0000000e+00   3.8685815e+01  -8.7034532e+01  -1.5747184e+02
   2.0655992e+01  -2.6799637e+01   0.0000000e+00  -2.1186876e+01  -1.5219660e+01  -1.5656027e+02
   2.0763428e+01  -2.6884600e+01   0.0000000e+00  -6.0636715e+01  -1.3588690e+00  -1.4782710e+02
   2.0875855e+01  -2.6964348e+01   0.0000000e+00  -1.1617461e+02   1.5900710e+01  -1.2400594e+02
   2.0992960e+01  -2.7038650e+01   0.0000000e+00  -1.2803504e+02   2.4166853e+01  -4.1897510e+01
   2.1114417e+01  -2.7107293e+01   0.0000000e+00  -7.6377914e+01  -3.0881303e+00   8.5670058e+00
   2.1239880e+01  -2.7170077e+01   0.0000000e+00  -3.2450807e+01  -1.2764433e+01  -6.4078995e+00
   2.1368996e+01  -2.7226821e+01   0.0000000e+00  -1.8214001e+01   1.1021363e+01  -1.3631215e+01
   2.1501393e+01  -2.7277360e+01   0.0000000e+00  -9.4961737e+00   2.9970309e+01   7.6886956e+00
   2.1636693e+01  -2.7321546e+01   0.0000000e+00  -1.4433302e+01   3.3881263e+01   3.2344270e+01
   2.1774505e+01  -2.7359252e+01   0.0000000e+00  -3.8509932e+01   1.7300374e+01   4.3727225e+01
   2.1914431e+01  -2.7390367e+01   0.0000000e+00  -4.7211505e+01   8.8961803e+00   2.2950113e+01
   2.2056064e+01  -2.7414799e+01   0.0000000e+00  -4.6027123e+01   3.2516181e+01   2.4640233e+01
   2.2198993e+01  -2.7432479e+01   0.0000000e+00  -4.8368556e+01   2.8400925e+01   4.5362828e+01
   2.2342800e+01  -2.7443353e+01   0.0000000e+00  -3.9277958e+01   1.0436897e+01   4.1192588e+01
   2.2487067e+01  -2.7447391e+01   0.0000000e+00  -2.5954464e+01  -1.7263514e+01   8.9953611e+00
   2.2631371e+01  -2.7444580e+01   0.0000000e+00  -2.0986215e+01   6.7161428e+01  -5.1290327e+01
   2.2775291e+01  -2.7434929e+01   0.0000000e+00  -5.2581559e+01   2.4909208e+02   9.6248219e+01
   2.2918408e+01  -2.7418466e+01   0.0000000e+00  -1.3987836e+02   1.6223367e+02   3.5533610e+02
   2.3060304e+01  -2.7395238e+01   0.0000000e+00  -2.2029270e+02  -8.5055394e+01   3.2074284e+02
   2.3200566e+01  -2.7365315e+01   0.0000000e+00  -2.0114221e+02  -1.3382585e+02   1.1520229e+02
   2.3338786e+01  -2.7328783e+01   0.0000000e+00  -1.2313881e+02  -6.6132790e+01   2.4642781e+01
   2.3474565e+01  -2.7285749e+01   0.0000000e+00  -1.2421814e+02  -4.0190014e+01  -3.5284187e+01
   2.3607511e+01  -2.7236338e+01   0.0000000e+00  -1.3628244e+02   2.4361047e+01  -1.2428580e+02
   2.3737242e+01  -2.7180694e+01   0.0000000e+00  -8.8147215e+01   8.3735020e+01  -9.9158370e+01
   2.3863387e+01  -2.7118979e+01   0.0000000e+00  -4.6323313e+01   5.1359858e+01  -4.3485055e+01
   2.3985587e+01  -2.7051372e+01   0.0000000e+00  -2.0089932e+01   1.8555746e+01  -3.0454356e+01
   2.4103496e+01  -2.6978068e+01   0.0000000e+00  -1.9133569e+00   7.6332980e+00  -2.7286697e+01
   2.4216785e+01  -2.6899280e+01   0.0000000e+00   5.4976473e+00  -1.3207738e+01  -1.6011238e+01
   2.4325137e+01  -2.6815234e+01   0.0000000e+00  -9.9218626e-01  -6.8036049e+01  -4.1882020e+01
   2.4428253e+01  -2.6726171e+01   0.0000000e+00   1.5869233e+01  -6.0295887e+01  -1.2866810e+02
   2.4525851e+01  -2.6632348e+01   0.0000000e+00   2.8795272e+01   3.5537809e+01  -1.3635332e+02
   2.4617666e+01  -2.6534033e+01   0.0000000e+00  -2.4008847e+01   7.9986744e+01  -8.7865931e+01
   2.4703453e+01  -2.6431505e+01   0.0000000e+00  -7.4021381e+01   7.0678581e+01  -9.9237397e+01
   2.4782984e+01  -2.6325057e+01   0.0000000e+00  -9.3627658e+01   8.6780257e+01  -1.4769120e+02
   2.4856053e+01  -2.6214991e+01   0.0000000e+00  -5.1712294e+01   1.2175738e+02  -2.0735372e+02
   2.4922472e+01  -2.6101616e+01   0.0000000e+00   8.9919915e+01   1.2450472e+02  -1.6994412e+02
   2.4982074e+01  -2.5985254e+01   0.0000000e+00   1.7652146e+02   6.7439521e+01   2.3244043e+01
   2.5034713e+01  -2.5866231e+01   0.0000000e+00   4.9039034e+01  -1.5084120e+01   1.4999855e+02
   2.5080263e+01  -2.5744879e+01   0.0000000e+00  -5.3132976e+01  -5.3346498e+01   3.3057818e+00
   2.5118620e+01  -2.5621539e+01   0.0000000e+00   1.0516864e+02  -1.4669917e+01  -6.3815961e+01
   2.5149700e+01  -2.5496552e+01   0.0000000e+00   1.6839383e+02   2.5141503e+01   1.8569178e+02
   2.5173439e+01  -2.5370266e+01   0.0000000e+00  -6.7473721e+01   9.2023552e+00   3.4179154e+02
   2.5189795e+01  -2.5243029e+01   0.0000000e+00  -2.8889952e+02  -9.0178343e+00   1.5875282e+02
   2.5198747e+01  -2.5115193e+01   0.0000000e+00  -2.5159465e+02   4.5142790e+01  -1.1811938e+02
   2.5200293e+01  -2.4987107e+01   0.0000000e+00  -7.4721091e+01   1.2093361e+02  -1.9434576e+02
   2.5194453e+01  -2.4859124e+01   0.0000000e+00  -9.2395274e+00   1.4347700e+02  -1.2771901e+02
   2.5181265e+01  -2.4731592e+01   0.0000000e+00  -3.4647682e+00   1.3028989e+02  -1.3306886e+02
   2.5160787e+01  -2.4604858e+01   0.0000000e+00   7.6957260e+01   9.9012874e+01  -1.1524019e+02
   2.5133098e+01  -2.4479266e+01   0.0000000e+00   9.2690419e+01   7.1079575e+01  -6.5914254e+00
   2.5098292e+01  -2.4355155e+01   0.0000000e+00   2.3714490e+01   6.8226136e+01   2.9409840e+01
   2.5056485e+01  -2.4232861e+01   0.0000000e+00   9.8570399e+00   6.5899265e+01  -3.5364254e+00
   2.5007809e+01  -2.4112712e+01   0.0000000e+00   3.7650607e+01   5.7457926e+01   3.0054368e+01
   2.4952412e+01  -2.3995031e+01   0.0000000e+00  -3.1163860e+01   8.0759826e+01   9.3389815e+01
   2.4890461e+01  -2.3880133e+01   0.0000000e+00  -1.2431753e+02   1.0725388e+02  -1.8166509e+01
   2.4822137e+01  -2.3768323e+01   0.0000000e+00  -1.4481396e+01   6.1537640e+01  -1.6647758e+02
   2.4747639e+01  -2.3659901e+01   0.0000000e+00   1.1939054e+02   4.3520226e+00  -9.3971268e+01
   2.4667178e+01  -2.3555153e+01   0.0000000e+00   7.7273216e+01  -1.7776547e+01   1.6093055e+01
   2.4580981e+01  -2.3454357e+01   0.0000000e+00  -1.3667265e+01  -4.0056995e+01   3.3698391e+01
   2.4489288e+01  -2.3357781e+01   0.0000000e+00  -7.0927729e+01  -4.9990006e+01  -1.2606298e+01
   2.4392353e+01  -2.3265678e+01   0.0000000e+00  -3.6791368e+01  -6.0092351e+01  -6.5418996e+01
   2.4290440e+01  -2.3178292e+01   0.0000000e+00   3.5295083e+01  -3.3107131e+01  -4.0252092e+01
   2.4183827e+01  -2.3095853e+01   0.0000000e+00   6.3616018e+01   9.3152478e-01  -1.4783737e+01
   2.4072800e+01  -2.3018576e+01   0.0000000e+00   6.7174621e+01   1.2107524e+01   2.4196308e+01
   2.3957657e+01  -2.2946665e+01   0.0000000e+00   2.7205485e+01   7.6771776e+01   1.3536240e+01
   2.3838706e+01  -2.2880307e+01   0.0000000e+00   1.6256431e+01   8.9970921e+01  -1.2103534e+02
   2.3716262e+01  -2.2819677e+01   0.0000000e+00   7.0126018e+01   3.0275573e+00  -1.7724684e+02
   2.3590649e+01  -2.2764933e+01   0.0000000e+00   8.9153580e+01  -2.5049660e+01  -1.1160263e+02
   2.3462196e+01  -2.2716217e+01   0.0000000e+00   5.0217277e+01   1.6405805e+01  -1.2874184e+02
   2.3331240e+01  -2.2673656e+01   0.0000000e+00   2.2485545e+01  -5.8703930e+01  -2.0749505e+02
   2.3198125e+01  -2.2637362e+01   0.0000000e+00   3.3653178e+01  -1.8862769e+02  -9.2447491e+01
   2.3063198e+01  -2.2607429e+01   0.0000000e+00   3.6331755e+01  -1.1885992e+02   8.6118501e+01
   2.2926808e+01  -2.2583934e+01   0.0000000e+00   2.0141990e+01  -7.0346955e+00   7.6136414e+01
   2.2789312e+01  -2.2566939e+01   0.0000000e+00   1.4262004e+01  -3.9097797e+00   3.4183208e+01
   2.2651066e+01  -2.2556488e+01   0.0000000e+00   7.9798808e+00  -1.0279491e+01   2.7988995e+01
   2.2512428e+01  -2.2552608e+01   0.0000000e+00   8.2631265e-01  -2.1523647e+01   3.2931065e+01
   2.2373758e+01  -2.2555309e+01   0.0000000e+00   2.6037724e+00  -6.7874582e-01   6.3189446e+01
   2.2235415e+01  -2.2564584e+01   0.0000000e+00  -4.4964563e+00   5.4804891e+01   4.2233548e+01
   2.2097758e+01  -2.2580409e+01   0.0000000e+00  -2.6614240e+01   4.9471902e+01  -3.4569682e+01
   2.1961144e+01  -2.2602743e+01   0.0000000e+00  -3.8785452e+01  -1.4477530e+01  -6.2969959e+01
   2.1825929e+01  -2.2631528e+01   0.0000000e+00  -2.8868326e+01  -4.0977160e+01  -4.9266028e+01
   2.1692463e+01  -2.2666689e+01   0.0000000e+00  -2.0026683e+01  -8.4233867e+01  -6.4100551e+01
   2.1561096e+01  -2.2708134e+01   0.0000000e+00  -2.7182001e+01  -1.9333278e+02  -1.2759312e+01
   2.1432169e+01  -2.2755756e+01   0.0000000e+00  -2.2919704e+01  -2.3795983e+02   1.3475655e+02
   2.1306022e+01  -2.2809431e+01   0.0000000e+00   2.2584178e+01  -1.7581990e+02   2.5622678e+02
   2.1182986e+01  -2.2869017e+01   0.0000000e+00   9.4753231e+01  -7.4205478e+01   2.7895501e+02
   2.1063386e+01  -2.2934361e+01   0.0000000e+00   1.4198243e+02  -3.8401956e+00   2.0614493e+02
   2.0947538e+01  -2.3005290e+01   0.0000000e+00   1.4455529e+02  -5.9386725e+00   1.2513913e+02
   2.0835752e+01  -2.3081620e+01   0.0000000e+00   1.5034593e+02  -3.4364352e+01   9.7417756e+01
   2.0728326e+01  -2.3163150e+01   0.0000000e+00   1.7978327e+02  -5.4452125e+01   6.8538581e+01
   2.0625550e+01  -2.3249666e+01   0.0000000e+00   1.8807534e+02  -8.5852780e+01   2.0916251e+01
   2.0527703e+01  -2.3340941e+01   0.0000000e+00   1.5883225e+02  -1.1494591e+02   4.5681278e+00
   2.0435052e+01  -2.3436734e+01   0.0000000e+00   1.2716566e+02  -1.1542174e+02   2.8364486e+01
   2.0347853e+01  -2.3536793e+01   0.0000000e+00   1.2273895e+02  -9.4237852e+01   5.9114721e+01
   2.0266347e+01  -2.3640853e+01   0.0000000e+00   1.5428599e+02  -6.4674764e+01   6.9894210e+01
   2.0190764e+01  -2.3748638e+01   0.0000000e+00   2.1619343e+02  -3.6304222e+01   2.4805848e+01
   2.0121319e+01  -2.3859862e+01   0.0000000e+00   2.5315601e+02  -3.4158878e+01  -9.6486769e+01
   2.0058212e+01  -2.3974230e+01   0.0000000e+00   1.9847609e+02  -7.0135968e+01  -2.2737401e+02
   2.0001628e+01  -2.4091435e+01   0.0000000e+00   7.3009568e+01  -1.2353662e+02  -2.6323246e+02
   1.9951736e+01  -2.4211165e+01   0.0000000e+00  -2.0336909e+01  -1.6039809e+02  -1.8597354e+02
   1.9908688e+01  -2.4333099e+01   0.0000000e+00  -3.2057206e+01  -1.6541938e+02  -9.0532587e+01
   1.9658258e+01  -2.4964135e+01   0.0000000e+00   1.6234004e+02  -6.6566584e+01  -4.9766934e+01
   1.9658331e+01  -2.5092538e+01   0.0000000e+00   1.1768666e+02  -7.4921983e+01  -1.6029644e+02
   1.9665471e+01  -2.5220779e+01   0.0000000e+00   9.3665625e+00  -6.6466919e+01  -1.8238229e+02
   1.9679684e+01  -2.5348537e+01   0.0000000e+00  -2.6483671e+01  -5.5507605e+01  -1.3191304e+02
   1.9700956e+01  -2.5475495e+01   0.0000000e+00  -2.7042052e+01  -4.2892236e+01  -1.1827878e+02
   1.9729257e+01  -2.5601333e+01   0.0000000e+00  -4.6167588e+01  -4.9784171e+00  -9.4640720e+01
   1.9764537e+01  -2.5725737e+01   0.0000000e+00  -3.4591206e+01   2.5094829e+01  -6.7810120e+01
   1.9806729e+01  -2.5848391e+01   0.0000000e+00  -4.7079608e+01   3.6511425e+01  -5.5816723e+01
   1.9855750e+01  -2.5968986e+01   0.0000000e+00  -5.9716373e+01   2.6129302e+01   9.1041491e+00
   1.9911494e+01  -2.6087216e+01   0.0000000e+00  -1.6588436e+01  -6.6448143e+00   3.9334553e+01
   1.9973842e+01  -2.6202779e+01   0.0000000e+00  -8.4614360e+00  -4.3135849e+00   1.2247425e+01
   2.0042654e+01  -2.6315381e+01   0.0000000e+00  -1.9909808e+01   2.5171690e+01   4.3183050e+01
   2.0117773e+01  -2.6424733e+01   0.0000000e+00   2.2373324e+01   2.5915022e+01   1.0428249e+02
   2.0199024e+01  -2.6530553e+01   0.0000000e+00   9.1966413e+01  -1.7285057e+01   1.2332068e+02
   2.0286214e+01  -2.6632570e+01   0.0000000e+00   1.3856122e+02  -9.4637911e+01   4.5030402e+01
   2.0379135e+01  -2.6730519e+01   0.0000000e+00   1.0226610e+02  -1.2475356e+02  -1.1264525e+02
   2.0477561e+01  -2.6824146e+01   0.0000000e+00   4.4243337e+00  -7.1183233e+01  -2.0221643e+02
   2.0581251e+01  -2.6913208e+01   0.0000000e+00  -7.7703504e+01  -1.8983945e+01  -1.7988420e+02
   2.0689946e+01  -2.6997472e+01   0.0000000e+00  -1.3188651e+02  -3.6209207e+00  -1.1617097e+02
   2.0803374e+01  -2.7076718e+01   0.0000000e+00  -1.5061594e+02   5.2763992e+00  -3.2885251e+01
   2.0921248e+01  -2.7150738e+01   0.0000000e+00  -1.0853592e+02  -3.8974740e+00   4.0286320e+01
   2.1043269e+01  -2.7219339e+01   0.0000000e+00  -4.4081372e+01  -3.0399229e+01   4.5536615e+01
   2.1169124e+01  -2.7282339e+01   0.0000000e+00  -9.5582883e+00  -3.2481686e+01   4.4853464e+00
   2.1298486e+01  -2.7339571e+01   0.0000000e+00   3.5104955e+00  -6.3539866e+00  -1.7111051e+01
   2.1431022e+01  -2.7390886e+01   0.0000000e+00   2.5914844e+01   1.6103021e+01  -1.9394365e+01
   2.1566384e+01  -2.7436147e+01   0.0000000e+00   4.2495223e+01   5.2950534e+01  -2.1732405e+01
   2.1704218e+01  -2.7475234e+01   0.0000000e+00   1.8991034e+01   7.6482504e+01   2.4265210e+01
   2.1844161e+01  -2.7508043e+01   0.0000000e+00  -9.5904721e+00   3.0823263e+01   5.3017492e+01
   2.1985845e+01  -2.7534487e+01   0.0000000e+00  -1.2930207e+01   2.4346633e+01   2.5750642e+01
   2.2128894e+01  -2.7554495e+01   0.0000000e+00  -1.1982554e+01   4.4960526e+01   4.3658312e+01
   2.2272929e+01  -2.7568015e+01   0.0000000e+00  -2.7857392e+01   3.0661918e+01   6.3392671e+01
   2.2417568e+01  -2.7575011e+01   0.0000000e+00  -5.0065767e+01  -1.0635090e+01   5.8700802e+01
   2.2562425e+01  -2.7575463e+01   0.0000000e+00  -2.8991170e+01  -3.5712170e+01  -4.0430695e+01
   2.2707117e+01  -2.7569371e+01   0.0000000e+00   4.7542353e+01   1.4758668e+02  -8.3181881e+01
   2.2851258e+01  -2.7556750e+01   0.0000000e+00   8.0312642e+01   2.9331743e+02   2.0533759e+02
   2.2994466e+01  -2.7537635e+01   0.0000000e+00   5.4522697e+00   8.2621100e+01   4.5265564e+02
   2.3136361e+01  -2.7512076e+01   0.0000000e+00  -8.0258750e+01  -1.6875888e+02   3.3567990e+02
   2.3276567e+01  -2.7480142e+01   0.0000000e+00  -6.5842483e+01  -2.1153047e+02   7.8745824e+01
   2.3414714e+01  -2.7441917e+01   0.0000000e+00   1.7366748e+00  -8.0834232e+01  -5.0814030e+01
   2.3550439e+01  -2.7397502e+01   0.0000000e+00  -5.9386920e+01   3.4997319e+01  -1.9303114e+01
   2.3683386e+01  -2.7347016e+01   0.0000000e+00  -1.4337080e+02   6.3231982e+01  -1.7802098e+01
   2.3813207e+01  -2.7290592e+01   0.0000000e+00  -1.3897961e+02   6.0936836e+01  -2.5072256e+01
   2.3939565e+01  -2.7228379e+01   0.0000000e+00  -1.0740386e+02   1.7780976e+01  -4.7516917e+01
   2.4062135e+01  -2.7160542e+01   0.0000000e+00  -5.4477521e+01  -4.2106320e+00  -8.4886289e+01
   2.4180600e+01  -2.7087259e+01   0.0000000e+00  -1.7234167e+01   3.9060961e+00  -8.5745966e+01
   2.4294660e+01  -2.7008723e+01   0.0000000e+00  -1.6715356e+01  -1.7274709e+01  -5.9514334e+01
   2.4404026e+01  -2.6925139e+01   0.0000000e+00  -2.4740496e+01  -7.2926492e+01  -1.0271333e+02
   2.4508422e+01  -2.6836727e+01   0.0000000e+00   3.9545791e+00  -2.3229122e+01  -2.0254859e+02
   2.4607590e+01  -2.6743716e+01   0.0000000e+00   4.8742100e+01   1.1747263e+02  -1.6724652e+02
   2.4701285e+01  -2.6646349e+01   0.0000000e+00  -3.7456490e+00   1.7305495e+02  -2.1727581e+01
   2.4789280e+01  -2.6544879e+01   0.0000000e+00  -9.5886545e+01   1.3026295e+02   4.2246390e+00
   2.4871364e+01  -2.6439568e+01   0.0000000e+00  -9.3967410e+01   1.1255173e+02  -2.8716800e+01
   2.4947340e+01  -2.6330687e+01   0.0000000e+00  -8.0520602e+01   1.2715074e+02  -2.5119774e+01
   2.5017033e+01  -2.6218517e+01   0.0000000e+00  -5.7149214e+01   1.2732688e+02  -5.2908264e+01
   2.5080283e+01  -2.6103346e+01   0.0000000e+00   3.7764791e+01   8.4468963e+01  -7.0186941e+01
   2.5136947e+01  -2.5985467e+01   0.0000000e+00   1.0890771e+02   2.2728150e+01   2.0917215e+01
   2.5186903e+01  -2.5865180e+01   0.0000000e+00   9.6695727e+00  -3.3753422e+00   8.5585230e+01
   2.5230044e+01  -2.5742792e+01   0.0000000e+00  -3.7539129e+01   3.2533640e+01  -2.7078510e+01
   2.5266284e+01  -2.5618612e+01   0.0000000e+00   1.1536155e+02   5.6482923e+01  -1.8126535e+01
   2.5295552e+01  -2.5492953e+01   0.0000000e+00   1.3256194e+02   1.0139897e+01   2.0930029e+02
   2.5317797e+01  -2.5366131e+01   0.0000000e+00  -9.6723265e+01  -3.1335597e+01   2.8323255e+02
   2.5332986e+01  -2.5238464e+01   0.0000000e+00  -2.3927845e+02   6.9808877e+00   8.7545248e+01
   2.5341104e+01  -2.5110271e+01   0.0000000e+00  -1.5172854e+02   1.0388883e+02  -7.8010647e+01
   2.5342152e+01  -2.4981871e+01   0.0000000e+00  -2.9737017e+01   1.6185817e+02  -6.1828102e+01
   2.5336150e+01  -2.4853584e+01   0.0000000e+00  -1.6607089e+01   1.6013990e+02  -5.2362637e+00
   2.5323136e+01  -2.4725725e+01   0.0000000e+00  -2.1943139e+01   1.4679365e+02  -3.8138255e+01
   2.5303161e+01  -2.4598612e+01   0.0000000e+00   4.3467708e+01   1.2155297e+02  -5.8877444e+01
   2.5276298e+01  -2.4472555e+01   0.0000000e+00   7.1136131e+01   8.5896703e+01   3.3379117e+00
   2.5242631e+01  -2.4347866e+01   0.0000000e+00   2.7341115e+01   7.4852520e+01   4.1780168e+01
   2.5202263e+01  -2.4224848e+01   0.0000000e+00   7.8093143e+00   7.8902078e+01   2.4361606e+01
   2.5155311e+01  -2.4103801e+01   0.0000000e+00   2.6251652e+01   6.4119522e+01   4.1551353e+01
   2.5101907e+01  -2.3985020e+01   0.0000000e+00  -2.5847278e+01   5.2127367e+01   1.1061740e+02
   2.5042198e+01  -2.3868793e+01   0.0000000e+00  -1.4352215e+02   6.7274220e+01   4.8900870e+01
   2.4976345e+01  -2.3755401e+01   0.0000000e+00  -8.4296635e+01   4.1052022e+01  -1.1597898e+02
   2.4904522e+01  -2.3645119e+01   0.0000000e+00   7.8236935e+01  -1.3513220e+01  -7.9933835e+01
   2.4826917e+01  -2.3538210e+01   0.0000000e+00   6.1810905e+01  -1.0520680e+01   3.9863019e+01
   2.4743728e+01  -2.3434933e+01   0.0000000e+00  -2.8944398e+01  -4.3106017e+00   1.2021255e+01
   2.4655167e+01  -2.3335535e+01   0.0000000e+00  -5.3437725e+01  -1.4837759e+01  -6.4443948e+01
   2.4561458e+01  -2.3240254e+01   0.0000000e+00  -1.5523197e+01  -2.1927583e+01  -1.3682172e+02
   2.4462834e+01  -2.3149316e+01   0.0000000e+00   7.5828074e+01  -5.6146882e+01  -1.0501093e+02
   2.4359540e+01  -2.3062940e+01   0.0000000e+00   8.9408203e+01  -3.2466368e+01   1.6866427e+01
   2.4251828e+01  -2.2981331e+01   0.0000000e+00   4.8288422e+01  -4.5316664e+00   4.5316144e+01
   2.4139963e+01  -2.2904682e+01   0.0000000e+00   3.2299691e+01  -9.8688704e+00   6.7774162e+01
   2.4024215e+01  -2.2833175e+01   0.0000000e+00   2.0729967e+01   4.8215037e+01   6.6256348e+01
   2.3904864e+01  -2.2766980e+01   0.0000000e+00   6.3967514e+01   7.9856953e+01  -1.7419829e+01
   2.3782195e+01  -2.2706254e+01   0.0000000e+00   1.2020429e+02   2.5276366e+01  -3.7973010e+01
   2.3656504e+01  -2.2651139e+01   0.0000000e+00   1.1855127e+02  -8.5320058e+00   1.6678801e+01
   2.3528089e+01  -2.2601767e+01   0.0000000e+00   1.1971325e+02   3.8782767e+01   1.7826776e+01
   2.3397254e+01  -2.2558253e+01   0.0000000e+00   1.3558742e+02   4.7300951e+01  -8.7465046e+01
   2.3264310e+01  -2.2520700e+01   0.0000000e+00   1.2259128e+02  -1.0187330e+02  -9.4683191e+01
   2.3129570e+01  -2.2489197e+01   0.0000000e+00   8.6220524e+01  -1.4229705e+02   8.3110028e+01
   2.2993353e+01  -2.2463818e+01   0.0000000e+00   5.4425929e+01  -1.7422330e+01   1.2737685e+02
   2.2855977e+01  -2.2444622e+01   0.0000000e+00   3.6493086e+01   1.6042328e+01   5.8599840e+01
   2.2717767e+01  -2.2431654e+01   0.0000000e+00   1.7297218e+01   3.7539683e+00   3.8672823e+01
   2.2579046e+01  -2.2424946e+01   0.0000000e+00   7.0619573e+00  -1.0457110e+01   2.8470740e+01
   2.2440140e+01  -2.2424512e+01   0.0000000e+00   4.6868448e+00  -1.7108792e+01   5.6826392e+01
   2.2301374e+01  -2.2430354e+01   0.0000000e+00  -9.0029048e+00   4.5113570e+01   6.8095938e+01
   2.2163073e+01  -2.2442458e+01   0.0000000e+00  -2.9120993e+01   8.6748716e+01  -2.0997221e+01
   2.2025563e+01  -2.2460796e+01   0.0000000e+00  -3.4337332e+01   1.8176751e+01  -1.0428647e+02
   2.1889167e+01  -2.2485325e+01   0.0000000e+00  -1.9270543e+01  -5.4642758e+01  -8.2047040e+01
   2.1754204e+01  -2.2515986e+01   0.0000000e+00  -6.5899171e+00  -5.8846164e+01  -6.6089457e+01
   2.1620993e+01  -2.2552708e+01   0.0000000e+00  -2.6705325e+01  -1.1495698e+02  -8.3618145e+01
   2.1489849e+01  -2.2595404e+01   0.0000000e+00  -5.9849705e+01  -2.1093082e+02  -8.6562428e-01
   2.1361081e+01  -2.2643974e+01   0.0000000e+00  -6.4555669e+01  -2.2563332e+02   1.5199200e+02
   2.1234995e+01  -2.2698303e+01   0.0000000e+00  -2.6495443e+01  -1.6129836e+02   2.7369815e+02
   2.1111892e+01  -2.2758262e+01   0.0000000e+00   4.5225206e+01  -6.2064399e+01   3.0933486e+02
   2.0992065e+01  -2.2823711e+01   0.0000000e+00   1.0782113e+02   4.7693832e+00   2.4221408e+02
   2.0875802e+01  -2.2894493e+01   0.0000000e+00   1.2318978e+02  -4.9165608e+00   1.5779463e+02
   2.0763384e+01  -2.2970442e+01   0.0000000e+00   1.1886520e+02  -4.1593695e+01   1.3422846e+02
   2.0655083e+01  -2.3051378e+01   0.0000000e+00   1.3439696e+02  -6.3750857e+01   1.3852470e+02
   2.0551163e+01  -2.3137108e+01   0.0000000e+00   1.5756152e+02  -8.3645759e+01   1.3118304e+02
   2.0451879e+01  -2.3227427e+01   0.0000000e+00   1.6292944e+02  -9.7990858e+01   1.1759833e+02
   2.0357477e+01  -2.3322122e+01   0.0000000e+00   1.4689273e+02  -9.4404597e+01   1.0663388e+02
   2.0268192e+01  -2.3420965e+01   0.0000000e+00   1.2837684e+02  -8.1576186e+01   1.0523922e+02
   2.0184248e+01  -2.3523721e+01   0.0000000e+00   1.3310884e+02  -6.7163125e+01   1.1161250e+02
   2.0105859e+01  -2.3630143e+01   0.0000000e+00   1.7091651e+02  -5.2099662e+01   1.0110491e+02
   2.0033225e+01  -2.3739975e+01   0.0000000e+00   2.2360436e+02  -5.2996734e+01   4.1549718e+01
   1.9966537e+01  -2.3852954e+01   0.0000000e+00   2.3943950e+02  -8.2756190e+01  -6.7639431e+01
   1.9905970e+01  -2.3968805e+01   0.0000000e+00   1.6971235e+02  -1.3210268e+02  -1.6330391e+02
   1.9851686e+01  -2.4087250e+01   0.0000000e+00   5.2170735e+01  -1.7370121e+02  -1.6009471e+02
   1.9803834e+01  -2.4208001e+01   0.0000000e+00  -1.7250957e+01  -1.7882515e+02  -7.2155003e+01
   1.9762549e+01  -2.4330765e+01   0.0000000e+00  -1.6540166e+01  -1.5899356e+02   6.5608425e+00
   1.9727950e+01  -2.4455242e+01   0.0000000e+00   4.2584973e+00  -1.3836167e+02   4.3006008e+01
   1.9700141e+01  -2.4581127e+01   0.0000000e+00   3.0142466e+01  -1.1980812e+02   6.4651532e+01
   1.9679211e+01  -2.4708114e+01   0.0000000e+00   7.3847827e+01  -9.9515803e+01   6.4715690e+01
   1.9665231e+01  -2.4835888e+01   0.0000000e+00   1.2404249e+02  -7.4998345e+01   3.0816285e+01
   1.9561507e+01  -2.5500819e+01   0.0000000e+00  -2.5878047e+00  -6.4388792e+01  -7.7535237e+01
   1.9589726e+01  -2.5626946e+01   0.0000000e+00  -1.2867873e+01  -2.4816261e+01  -8.3868244e+01
   1.9624627e+01  -2.5751714e+01   0.0000000e+00  -1.9986360e+01   4.3798843e+00  -7.4790691e+01
   1.9666153e+01  -2.5874835e+01   0.0000000e+00  -4.0279945e+01   2.6638553e+01  -6.9881639e+01
   1.9714228e+01  -2.5996026e+01   0.0000000e+00  -6.1785370e+01   4.5812782e+01  -1.5482216e+01
   1.9768761e+01  -2.6115005e+01   0.0000000e+00  -2.6212226e+01   2.5307973e+01   3.3821659e+01
   1.9829646e+01  -2.6231497e+01   0.0000000e+00  -4.7564172e-01  -4.0824160e+00   7.6706701e+00
   1.9896760e+01  -2.6345231e+01   0.0000000e+00  -1.1814078e+01  -1.5424311e+00  -4.3853082e+00
   1.9969966e+01  -2.6455941e+01   0.0000000e+00   1.8392240e+01   4.1150929e-01   1.9054315e+01
   2.0049110e+01  -2.6563367e+01   0.0000000e+00   8.4925317e+01   6.7345284e-01   1.1944860e+01
   2.0134023e+01  -2.6667257e+01   0.0000000e+00   1.1711831e+02  -1.1823028e+01  -2.2353886e+01
   2.0224521e+01  -2.6767366e+01   0.0000000e+00   8.0538161e+01  -6.7424487e+01  -7.8505154e+01
   2.0320404e+01  -2.6863457e+01   0.0000000e+00  -3.4087371e+00  -1.0166228e+02  -1.4465810e+02
   2.0421461e+01  -2.6955302e+01   0.0000000e+00  -8.7774334e+01  -6.7606838e+01  -1.5727339e+02
   2.0527463e+01  -2.7042683e+01   0.0000000e+00  -1.3278953e+02  -2.1858340e+01  -9.5572049e+01
   2.0638171e+01  -2.7125392e+01   0.0000000e+00  -1.2468878e+02   2.5859236e+00  -1.3608672e+01
   2.0753330e+01  -2.7203230e+01   0.0000000e+00  -8.0153747e+01   8.7991089e+00   4.8319504e+01
   2.0872674e+01  -2.7276011e+01   0.0000000e+00  -2.5545428e+01  -1.0121519e+01   6.6130042e+01
   2.0995925e+01  -2.7343561e+01   0.0000000e+00   8.6732457e+00  -3.3305941e+01   3.8806074e+01
   2.1122795e+01  -2.7405716e+01   0.0000000e+00   2.0210302e+01  -3.4823957e+01  -2.8621716e+00
   2.1252984e+01  -2.7462327e+01   0.0000000e+00   2.9721954e+01  -1.7898741e+01  -2.7296330e+01
   2.1386183e+01  -2.7513257e+01   0.0000000e+00   4.9986534e+01  -7.4099315e+00  -5.6534464e+01
   2.1522075e+01  -2.7558383e+01   0.0000000e+00   5.0122812e+01   4.3383850e+01  -1.0066369e+02
   2.1660335e+01  -2.7597595e+01   0.0000000e+00   1.8675245e+01   1.1064471e+02  -4.5599207e+01
   2.1800629e+01  -2.7630798e+01   0.0000000e+00   3.4099131e+00   6.5591041e+01   4.3321176e+01
   2.1942620e+01  -2.7657911e+01   0.0000000e+00   6.0973238e+00   1.9202145e+01   2.4364929e+01
   2.2085964e+01  -2.7678868e+01   0.0000000e+00   1.1662895e+01   4.2884034e+01   1.3986854e+01
   2.2230314e+01  -2.7693619e+01   0.0000000e+00   1.1635293e+01   5.8625380e+01   4.4930148e+01
   2.2375319e+01  -2.7702127e+01   0.0000000e+00  -1.0321291e+01   3.7313237e+01   9.9990335e+01
   2.2520628e+01  -2.7704372e+01   0.0000000e+00  -3.9037997e+01  -5.8253460e+01   6.6674790e+01
   2.2665886e+01  -2.7700348e+01   0.0000000e+00  -3.8018612e+00  -2.2690062e+01  -1.1672987e+02
   2.2810741e+01  -2.7690065e+01   0.0000000e+00   1.1425873e+02   2.1809289e+02  -7.7712838e+01
   2.2954841e+01  -2.7673548e+01   0.0000000e+00   1.5600958e+02   2.1310121e+02   2.4491487e+02
   2.3097836e+01  -2.7650838e+01   0.0000000e+00   8.5320599e+01  -4.2685649e+01   3.4529151e+02
   2.3239380e+01  -2.7621989e+01   0.0000000e+00  -3.6703864e+01  -2.1167120e+02   1.7826692e+02
   2.3379131e+01  -2.7587071e+01   0.0000000e+00  -4.2744417e+01  -2.0766425e+02  -1.2624629e+02
   2.3516752e+01  -2.7546171e+01   0.0000000e+00   4.6872249e+01   5.5660986e+01  -1.8218352e+02
   2.3651913e+01  -2.7499386e+01   0.0000000e+00  -4.2654780e+01   1.5173516e+02   4.0999891e+01
   2.3784289e+01  -2.7446830e+01   0.0000000e+00  -1.3878889e+02   7.7450057e+01   8.5981406e+01
   2.3913567e+01  -2.7388631e+01   0.0000000e+00  -1.5870603e+02   3.9879402e+01   6.5984362e+01
   2.4039440e+01  -2.7324929e+01   0.0000000e+00  -1.6156396e+02  -1.0157032e+01  -2.0064181e+00
   2.4161611e+01  -2.7255877e+01   0.0000000e+00  -1.1652063e+02   4.4221931e+00  -9.6539864e+01
   2.4279795e+01  -2.7181642e+01   0.0000000e+00  -8.4403349e+01   4.6044083e+01  -9.7167899e+01
   2.4393717e+01  -2.7102402e+01   0.0000000e+00  -9.3875378e+01  -1.3752770e+01  -8.7375518e+01
   2.4503114e+01  -2.7018346e+01   0.0000000e+00  -6.6190869e+01  -5.6050022e+01  -1.9977295e+02
   2.4607736e+01  -2.6929676e+01   0.0000000e+00  -3.3068396e+00   6.6298029e+01  -2.6288312e+02
   2.4707347e+01  -2.6836603e+01   0.0000000e+00   5.1588288e+01   1.9588859e+02  -1.5873303e+02
   2.4801723e+01  -2.6739348e+01   0.0000000e+00   3.6126400e+01   2.1224615e+02   4.9437253e+01
   2.4890655e+01  -2.6638142e+01   0.0000000e+00  -8.8303279e+01   1.2615301e+02   1.2889681e+02
   2.4973949e+01  -2.6533223e+01   0.0000000e+00  -1.1230203e+02   6.1128964e+01   3.5367765e+01
   2.5051423e+01  -2.6424839e+01   0.0000000e+00  -4.7924073e+01   5.1971891e+01  -1.2112659e+00
   2.5122915e+01  -2.6313244e+01   0.0000000e+00  -3.1872261e+01   6.2080009e+01   9.6241067e+00
   2.5188275e+01  -2.6198700e+01   0.0000000e+00  -4.0670432e+01   7.3870032e+01  -1.6961755e+01
   2.5247369e+01  -2.6081474e+01   0.0000000e+00   1.4578254e+01   6.2068365e+01  -4.6267874e+01
   2.5300079e+01  -2.5961839e+01   0.0000000e+00   5.8422735e+01   2.7649420e+01   2.6558616e+01
   2.5346303e+01  -2.5840072e+01   0.0000000e+00   3.1430726e+00   1.1266939e+01   6.8492849e+01
   2.5385955e+01  -2.5716454e+01   0.0000000e+00   1.8010028e+01   3.0364925e+01   2.9221975e+01
   2.5418965e+01  -2.5591271e+01   0.0000000e+00   1.0559490e+02   1.4513129e+01   8.7505157e+01
   2.5445279e+01  -2.5464810e+01   0.0000000e+00   4.8440596e+01  -3.2749894e+01   2.2369761e+02
   2.5464856e+01  -2.5337360e+01   0.0000000e+00  -1.2272774e+02  -4.2593684e+01   1.9909701e+02
   2.5477675e+01  -2.5209213e+01   0.0000000e+00  -1.4290648e+02   1.7090494e+01   6.0960868e+01
   2.5483728e+01  -2.5080658e+01   0.0000000e+00  -5.9784441e+01   8.3214718e+01   2.9011126e+01
   2.5483022e+01  -2.4951989e+01   0.0000000e+00  -2.4331671e+01   9.0877585e+01   6.2991170e+01
   2.5475580e+01  -2.4823495e+01   0.0000000e+00  -3.6995158e+01   8.0113865e+01   6.1796667e+01
   2.5461440e+01  -2.4695467e+01   0.0000000e+00  -1.8053858e+01   9.0504500e+01   1.3939184e+01
   2.5440654e+01  -2.4568191e+01   0.0000000e+00   3.5865731e+01   1.0409999e+02   5.2077996e+00
   2.5413289e+01  -2.4441952e+01   0.0000000e+00   4.3151913e+01   9.2302667e+01   3.9345834e+01
   2.5379424e+01  -2.4317033e+01   0.0000000e+00   1.6709544e+01   7.4203232e+01   5.6602201e+01
   2.5339155e+01  -2.4193711e+01   0.0000000e+00   8.9252307e+00   7.5448420e+01   6.0449562e+01
   2.5292589e+01  -2.4072260e+01   0.0000000e+00  -4.3934151e+00   6.4786412e+01   8.2801574e+01
   2.5239846e+01  -2.3952950e+01   0.0000000e+00  -7.1223581e+01   3.2852445e+01   1.1400914e+02
   2.5181059e+01  -2.3836043e+01   0.0000000e+00  -1.7155383e+02   3.3866846e+01   3.8319443e+01
   2.5116373e+01  -2.3721796e+01   0.0000000e+00  -1.1944824e+02   1.2213961e+01  -1.2857731e+02
   2.5045945e+01  -2.3610462e+01   0.0000000e+00   3.7569434e+01  -5.3539541e+01  -1.1308479e+02
   2.4969943e+01  -2.3502284e+01   0.0000000e+00   4.1580808e+01  -5.9890760e+01   1.9530342e+01
   2.4888547e+01  -2.3397498e+01   0.0000000e+00  -3.6420041e+01  -1.1093863e+01   7.9804568e+00
   2.4801945e+01  -2.3296334e+01   0.0000000e+00  -2.0809065e+01   3.0708178e+00  -7.6694892e+01
   2.4710338e+01  -2.3199011e+01   0.0000000e+00   4.7267917e+01   1.7615161e+01  -9.8341720e+01
   2.4613934e+01  -2.3105742e+01   0.0000000e+00   1.0784978e+02   7.5483283e+00  -7.7931416e+01
   2.4512952e+01  -2.3016728e+01   0.0000000e+00   1.0315718e+02  -3.1103537e+01   2.4211504e+01
   2.4407618e+01  -2.2932162e+01   0.0000000e+00   2.2177811e+01  -1.5349617e+01   7.4950361e+01
   2.4298167e+01  -2.2852228e+01   0.0000000e+00  -7.3790289e+00  -1.7990759e+01   3.8893854e+01
   2.4184843e+01  -2.2777097e+01   0.0000000e+00  -1.0752187e+01  -3.1729443e+01   4.7321128e+01
   2.4067894e+01  -2.2706932e+01   0.0000000e+00  -1.0135650e+01  -1.2502251e+01   6.0665393e+01
   2.3947577e+01  -2.2641884e+01   0.0000000e+00   1.8587363e+01   8.9257289e-01   6.1406597e+01
   2.3824154e+01  -2.2582093e+01   0.0000000e+00   1.6693015e+01  -9.2462870e+00   5.6972914e+01
   2.3697894e+01  -2.2527687e+01   0.0000000e+00   1.2198840e+01  -5.4012889e+01   4.6796522e+01
   2.3569070e+01  -2.2478782e+01   0.0000000e+00   6.9912427e+01  -5.1812376e+01   1.0822753e+02
   2.3437960e+01  -2.2435485e+01   0.0000000e+00   1.0110295e+02   3.8326687e+01   1.0625398e+02
   2.3304846e+01  -2.2397887e+01   0.0000000e+00   6.6881493e+01  -2.9423664e+01   2.7078338e+01
   2.3170014e+01  -2.2366070e+01   0.0000000e+00   2.0212254e+01  -1.3328478e+02   1.2419702e+02
   2.3033751e+01  -2.2340100e+01   0.0000000e+00   8.8967676e+00  -5.2518814e+01   2.0702642e+02
   2.2896351e+01  -2.2320035e+01   0.0000000e+00   2.8437831e+01   2.2588692e+01   1.4637952e+02
   2.2758106e+01  -2.2305916e+01   0.0000000e+00   2.0065462e+01   2.9434954e+01   7.7923831e+01
   2.2619311e+01  -2.2297773e+01   0.0000000e+00   3.0350926e+00   3.1130158e+00   3.9272214e+01
   2.2480261e+01  -2.2295625e+01   0.0000000e+00  -7.4818218e-01  -1.6496565e+01   5.9174689e+01
   2.2341254e+01  -2.2299476e+01   0.0000000e+00  -1.3341994e+01   4.1930019e+01   6.9840551e+01
   2.2202585e+01  -2.2309317e+01   0.0000000e+00  -2.0980610e+01   9.4372213e+01  -2.5246489e+01
   2.2064549e+01  -2.2325128e+01   0.0000000e+00  -6.0596578e+00   3.2477858e+01  -1.2963600e+02
   2.1927442e+01  -2.2346874e+01   0.0000000e+00   5.2759389e+00  -6.4127245e+01  -1.1364969e+02
   2.1791557e+01  -2.2374510e+01   0.0000000e+00   1.2583345e+01  -7.4885677e+01  -5.0401330e+01
   2.1657183e+01  -2.2407975e+01   0.0000000e+00   1.2797535e+01  -7.2395475e+01  -6.9019458e+01
   2.1524609e+01  -2.2447199e+01   0.0000000e+00  -2.1973591e+01  -1.5372929e+02  -6.8675743e+01
   2.1394119e+01  -2.2492098e+01   0.0000000e+00  -6.5382173e+01  -2.1318207e+02   4.0890057e+01
   2.1265995e+01  -2.2542575e+01   0.0000000e+00  -8.6011549e+01  -1.8844714e+02   1.7521577e+02
   2.1140513e+01  -2.2598522e+01   0.0000000e+00  -6.9477769e+01  -1.1471104e+02   2.7529516e+02
   2.1017944e+01  -2.2659819e+01   0.0000000e+00  -1.0695166e+01  -2.8991513e+01   3.0196197e+02
   2.0898557e+01  -2.2726334e+01   0.0000000e+00   5.2396609e+01   1.4068611e+01   2.5044672e+02
   2.0782611e+01  -2.2797925e+01   0.0000000e+00   7.6831319e+01  -9.9701838e-01   1.9050883e+02
   2.0670361e+01  -2.2874436e+01   0.0000000e+00   7.5221137e+01  -2.9152830e+01   1.7433018e+02
   2.0562055e+01  -2.2955703e+01   0.0000000e+00   7.7402578e+01  -4.1757777e+01   1.8318536e+02
   2.0457932e+01  -2.3041550e+01   0.0000000e+00   8.9070105e+01  -4.6871576e+01   1.9229299e+02
   2.0358227e+01  -2.3131792e+01   0.0000000e+00   1.0663149e+02  -4.5266089e+01   1.9011109e+02
   2.0263163e+01  -2.3226233e+01   0.0000000e+00   1.1653907e+02  -3.8551991e+01   1.6688027e+02
   2.0172956e+01  -2.3324668e+01   0.0000000e+00   1.0924163e+02  -3.7085317e+01   1.4354143e+02
   2.0087812e+01  -2.3426883e+01   0.0000000e+00   1.0563215e+02  -3.5284054e+01   1.4273120e+02
   2.0007928e+01  -2.3532655e+01   0.0000000e+00   1.2558221e+02  -2.6140987e+01   1.4069459e+02
   1.9933490e+01  -2.3641754e+01   0.0000000e+00   1.5834222e+02  -2.7960530e+01   1.1249431e+02
   1.9864676e+01  -2.3753940e+01   0.0000000e+00   1.8968282e+02  -5.6265825e+01   5.6465592e+01
   1.9801649e+01  -2.3868967e+01   0.0000000e+00   1.8164940e+02  -1.0232826e+02  -2.3798513e+01
   1.9744563e+01  -2.3986583e+01   0.0000000e+00   1.0605292e+02  -1.4545840e+02  -6.7409723e+01
   1.9693560e+01  -2.4106528e+01   0.0000000e+00   2.5181918e+01  -1.5537688e+02  -3.3809468e+01
   1.9648769e+01  -2.4228537e+01   0.0000000e+00  -7.5839313e+00  -1.3319537e+02   2.4540501e+01
   1.9610308e+01  -2.4352341e+01   0.0000000e+00  -2.6269267e+00  -1.1077106e+02   6.6169615e+01
   1.9578279e+01  -2.4477663e+01   0.0000000e+00   1.7383861e+01  -9.4724187e+01   8.8330324e+01
   1.9552774e+01  -2.4604225e+01   0.0000000e+00   4.6514589e+01  -8.0215838e+01   1.0121812e+02
   1.9533868e+01  -2.4731743e+01   0.0000000e+00   9.6268899e+01  -7.1961578e+01   9.1191590e+01
   1.9521625e+01  -2.4859933e+01   0.0000000e+00   1.4594063e+02  -6.5181712e+01   3.4350997e+01
   1.9516092e+01  -2.4988506e+01   0.0000000e+00   1.5545604e+02  -6.4088465e+01  -5.9216899e+01
   1.9517303e+01  -2.5117173e+01   0.0000000e+00   9.1562883e+01  -7.4546005e+01  -1.4107232e+02
   1.9525276e+01  -2.5245641e+01   0.0000000e+00  -1.4234200e+00  -8.1517421e+01  -1.3898410e+02
   1.9540015e+01  -2.5373620e+01   0.0000000e+00  -2.2948803e+01  -8.1482492e+01  -8.4903288e+01
   1.9582278e+01  -2.6044625e+01   0.0000000e+00  -5.1734815e+01   4.4011122e+01  -5.4248491e+01
   1.9636798e+01  -2.6163869e+01   0.0000000e+00  -3.8932630e+01   3.9915709e+01  -1.0746616e+01
   1.9697417e+01  -2.6280740e+01   0.0000000e+00  -2.5937757e+01   2.1043450e+00  -3.9482759e+00
   1.9764025e+01  -2.6394989e+01   0.0000000e+00  -3.3798941e+01  -2.4604762e+01  -1.3599389e+00
   1.9836497e+01  -2.6506371e+01   0.0000000e+00  -7.8892158e+00  -5.2253282e+01   2.2254504e+01
   1.9914695e+01  -2.6614647e+01   0.0000000e+00   6.3456322e+01  -8.1670004e+01  -1.9644345e+01
   1.9998467e+01  -2.6719585e+01   0.0000000e+00   8.1510421e+01  -5.9186256e+01  -1.1517893e+02
   2.0087649e+01  -2.6820956e+01   0.0000000e+00   2.0189546e+01  -3.4157116e+01  -1.2994565e+02
   2.0182062e+01  -2.6918543e+01   0.0000000e+00  -3.5555414e+01  -6.1815728e+01  -9.0982259e+01
   2.0281515e+01  -2.7012132e+01   0.0000000e+00  -7.4714072e+01  -7.0115365e+01  -8.0114653e+01
   2.0385805e+01  -2.7101520e+01   0.0000000e+00  -1.0526514e+02  -3.7294833e+01  -5.0162461e+01
   2.0494715e+01  -2.7186511e+01   0.0000000e+00  -9.0295209e+01  -1.5826204e+01  -4.0241300e+00
   2.0608019e+01  -2.7266919e+01   0.0000000e+00  -4.8418677e+01  -1.7593658e+00   1.6276920e+01
   2.0725477e+01  -2.7342569e+01   0.0000000e+00  -1.0820004e+01  -1.2207199e+00   2.9766559e+01
   2.0846840e+01  -2.7413292e+01   0.0000000e+00   1.9713390e+01  -1.7457971e+01   2.5474288e+01
   2.0971849e+01  -2.7478933e+01   0.0000000e+00   3.3396386e+01  -3.0573611e+01   4.9096297e+00
   2.1100234e+01  -2.7539347e+01   0.0000000e+00   3.6225083e+01  -3.3113010e+01  -2.5413929e+01
   2.1231716e+01  -2.7594400e+01   0.0000000e+00   3.9972007e+01  -2.8937257e+01  -5.5839318e+01
   2.1366011e+01  -2.7643970e+01   0.0000000e+00   3.9481474e+01  -1.7142861e+01  -1.0581350e+02
   2.1502822e+01  -2.7687946e+01   0.0000000e+00   8.9291813e+00   5.3070412e+01  -1.3299056e+02
   2.1641851e+01  -2.7726231e+01   0.0000000e+00  -1.3985600e+01   1.1626922e+02  -4.2048047e+01
   2.1782789e+01  -2.7758739e+01   0.0000000e+00   5.2287071e+00   6.2767274e+01   4.3555601e+01
   2.1925324e+01  -2.7785398e+01   0.0000000e+00   1.5839111e+01   1.9332583e+01   1.8488554e+01
   2.2069141e+01  -2.7806148e+01   0.0000000e+00   1.4504651e+01   3.3821754e+01   2.6130272e-01
   2.2213918e+01  -2.7820943e+01   0.0000000e+00   2.4888316e+01   5.4611601e+01   1.2690703e+01
   2.2359334e+01  -2.7829750e+01   0.0000000e+00   3.8087981e+01   6.0369260e+01   6.5894285e+01
   2.2505064e+01  -2.7832548e+01   0.0000000e+00   1.2982580e+01  -8.3515699e+00   1.0474902e+02
   2.2650783e+01  -2.7829332e+01   0.0000000e+00  -2.5509157e+01  -8.0440027e+01  -1.9869016e+01
   2.2796165e+01  -2.7820109e+01   0.0000000e+00   2.6577720e+01   9.5596781e+01  -1.5484240e+02
   2.2940886e+01  -2.7804899e+01   0.0000000e+00   9.5146205e+01   2.1379833e+02   6.4466757e+01
   2.3084624e+01  -2.7783737e+01   0.0000000e+00   1.4596708e+02   1.5626007e+01   1.9644935e+02
   2.3227059e+01  -2.7756669e+01   0.0000000e+00   8.0234479e+01  -4.9255633e+01   1.7758623e+02
   2.3367874e+01  -2.7723757e+01   0.0000000e+00  -1.3441959e+02  -1.8995256e+02   5.2670289e+01
   2.3506758e+01  -2.7685074e+01   0.0000000e+00  -6.7443415e+01  -6.8407584e+01  -2.8856927e+02
   2.3643404e+01  -2.7640706e+01   0.0000000e+00   4.8489308e+01   2.4638756e+02  -7.8555318e+01
   2.3777513e+01  -2.7590751e+01   0.0000000e+00  -6.1724038e+01   1.3508922e+02   1.8182632e+02
   2.3908790e+01  -2.7535322e+01   0.0000000e+00  -1.0537794e+02   3.3828659e+01   1.5193994e+02
   2.4036949e+01  -2.7474540e+01   0.0000000e+00  -1.2439767e+02  -1.8712626e+01   1.2553525e+02
   2.4161713e+01  -2.7408541e+01   0.0000000e+00  -1.3347279e+02  -3.7032207e+01   8.6253036e+00
   2.4282813e+01  -2.7337470e+01   0.0000000e+00  -1.1102448e+02   5.7240119e+01  -5.0192013e+01
   2.4399990e+01  -2.7261485e+01   0.0000000e+00  -1.4103528e+02   7.6015659e+01   6.6368387e+00
   2.4512996e+01  -2.7180752e+01   0.0000000e+00  -1.9460839e+02  -2.6429764e+01  -9.2232207e+01
   2.4621593e+01  -2.7095449e+01   0.0000000e+00  -1.1712702e+02   4.5690128e+01  -2.8539931e+02
   2.4725553e+01  -2.7005763e+01   0.0000000e+00  -3.2084347e+01   2.2136852e+02  -2.2094838e+02
   2.4824663e+01  -2.6911889e+01   0.0000000e+00  -3.1702918e+00   2.4642153e+02  -6.6251606e+01
   2.4918718e+01  -2.6814033e+01   0.0000000e+00   2.9405181e+01   1.7623413e+02   9.7336477e+01
   2.5007530e+01  -2.6712406e+01   0.0000000e+00  -6.0201244e+01   5.8986478e+01   1.7178958e+02
   2.5090920e+01  -2.6607230e+01   0.0000000e+00  -1.1914568e+02   1.4960474e+01   4.3899444e+01
   2.5168725e+01  -2.6498730e+01   0.0000000e+00  -7.1315202e+01   5.1182492e+01  -4.7160024e+01
   2.5240794e+01  -2.6387141e+01   0.0000000e+00  -2.4429973e+01   8.0237392e+01  -3.2422025e+01
   2.5306989e+01  -2.6272702e+01   0.0000000e+00  -3.0282791e+01   8.7501790e+01   2.5850129e+01
   2.5367188e+01  -2.6155658e+01   0.0000000e+00  -4.1680302e+01   6.9138921e+01   2.6615554e+01
   2.5421281e+01  -2.6036259e+01   0.0000000e+00   3.0720392e+00   3.6968083e+01   2.6475343e+01
   2.5469171e+01  -2.5914758e+01   0.0000000e+00   1.3070678e+01  -4.0481718e+00   5.0251712e+01
   2.5510778e+01  -2.5791412e+01   0.0000000e+00   1.1687693e+01  -1.8054949e+01   4.0869687e+01
   2.5546034e+01  -2.5666483e+01   0.0000000e+00   5.7031568e+01  -2.1845870e+01   4.6843112e+01
   2.5574885e+01  -2.5540232e+01   0.0000000e+00   7.6068731e+01  -4.3529392e+01   1.3331755e+02
   2.5597291e+01  -2.5412926e+01   0.0000000e+00  -4.0057744e+01  -7.3724325e+01   1.8220915e+02
   2.5613226e+01  -2.5284830e+01   0.0000000e+00  -1.0609101e+02  -6.8880073e+01   8.0452214e+01
   2.5622677e+01  -2.5156210e+01   0.0000000e+00  -4.5769513e+01  -1.7776760e+01   4.1017534e+01
   2.5625646e+01  -2.5027335e+01   0.0000000e+00  -3.1757013e+01   9.0321698e+00   6.4002850e+01
   2.5622147e+01  -2.4898470e+01   0.0000000e+00  -3.8412568e+01   6.8040825e+00   5.3005975e+01
   2.5612207e+01  -2.4769883e+01   0.0000000e+00  -2.6615506e+01   1.6728261e+01   1.6561459e+01
   2.5595867e+01  -2.4641837e+01   0.0000000e+00   3.1708744e+01   4.8702396e+01   1.1472806e+01
   2.5573179e+01  -2.4514596e+01   0.0000000e+00   5.1047533e+01   8.4050145e+01   6.7298694e+01
   2.5544210e+01  -2.4388419e+01   0.0000000e+00   7.9810025e+00   8.3039042e+01   9.0431419e+01
   2.5509036e+01  -2.4263564e+01   0.0000000e+00  -2.9564805e+00   5.4341696e+01   7.5801051e+01
   2.5467747e+01  -2.4140284e+01   0.0000000e+00   5.7265935e+00   5.6141474e+01   1.1251189e+02
   2.5420444e+01  -2.4018831e+01   0.0000000e+00  -7.0885712e+01   5.2905156e+01   1.2819847e+02
   2.5367238e+01  -2.3899449e+01   0.0000000e+00  -1.4903758e+02   4.5902095e+00   7.4613016e+01
   2.5308254e+01  -2.3782379e+01   0.0000000e+00  -1.8652056e+02   3.7637295e+00  -2.8302597e+01
   2.5243625e+01  -2.3667857e+01   0.0000000e+00  -1.0531058e+02  -1.8379363e+00  -1.6654096e+02
   2.5173494e+01  -2.3556112e+01   0.0000000e+00   3.0291889e+01  -5.1089793e+01  -1.5065172e+02
   2.5098015e+01  -2.3447369e+01   0.0000000e+00   3.8331237e+01  -6.5920481e+01  -4.9324822e+01
   2.5017352e+01  -2.3341845e+01   0.0000000e+00  -6.5159634e+00  -2.2515350e+01  -3.2307515e+01
   2.4931676e+01  -2.3239751e+01   0.0000000e+00   1.8749399e+01   2.9690671e+00  -7.5492832e+01
   2.4841169e+01  -2.3141288e+01   0.0000000e+00   8.3705441e+01  -4.8103312e+00  -3.4292732e+01
   2.4746020e+01  -2.3046654e+01   0.0000000e+00   8.6635237e+01   7.2551975e+00   3.6404891e+01
   2.4646427e+01  -2.2956035e+01   0.0000000e+00   4.0109680e+01  -1.1684931e+01   6.3728871e+01
   2.4542595e+01  -2.2869611e+01   0.0000000e+00  -2.6332908e+01  -2.9282078e+01   5.6311048e+01
   2.4434735e+01  -2.2787553e+01   0.0000000e+00  -3.2911215e+01  -3.2593511e+01   1.8724822e+01
   2.4323068e+01  -2.2710022e+01   0.0000000e+00  -1.6678639e+01  -2.8072371e+01   1.8741786e+01
   2.4207817e+01  -2.2637172e+01   0.0000000e+00  -3.7862819e+01  -2.7842800e+01   1.1484719e+01
   2.4089216e+01  -2.2569145e+01   0.0000000e+00  -4.2985932e+01  -4.5791487e+01   1.0838650e+01
   2.3967500e+01  -2.2506075e+01   0.0000000e+00  -4.8234965e+01  -3.4345875e+01   2.4013472e+01
   2.3842912e+01  -2.2448087e+01   0.0000000e+00  -5.9164286e+01  -3.0208460e+01  -2.4911390e+01
   2.3715699e+01  -2.2395293e+01   0.0000000e+00  -1.1191505e+01  -1.1695091e+02  -2.9259873e+01
   2.3586111e+01  -2.2347797e+01   0.0000000e+00   2.0724768e+01  -1.1798458e+02   1.4369407e+02
   2.3454405e+01  -2.2305692e+01   0.0000000e+00  -3.2423222e+01   2.5384892e+01   1.7201156e+02
   2.3320837e+01  -2.2269060e+01   0.0000000e+00  -7.5095109e+01  -2.8579808e+00   3.2279537e+01
   2.3185671e+01  -2.2237973e+01   0.0000000e+00  -1.2013167e+02  -1.2205155e+02   5.6764342e+01
   2.3049170e+01  -2.2212492e+01   0.0000000e+00  -1.3253188e+02  -1.1641444e+02   1.5903842e+02
   2.2911600e+01  -2.2192666e+01   0.0000000e+00  -7.6140850e+01  -3.5893781e+01   1.8812470e+02
   2.2773229e+01  -2.2178534e+01   0.0000000e+00  -3.6407179e+01   2.8665324e+01   1.2394195e+02
   2.2634327e+01  -2.2170124e+01   0.0000000e+00  -2.6738144e+01   9.6958171e+00   4.7826163e+01
   2.2495164e+01  -2.2167452e+01   0.0000000e+00  -2.0047930e+01  -1.6830100e+01   5.5562459e+01
   2.2356011e+01  -2.2170523e+01   0.0000000e+00  -1.4760067e+01   3.8858587e+01   5.4524359e+01
   2.2217137e+01  -2.2179331e+01   0.0000000e+00   5.0287653e+00   7.2213594e+01  -3.9972523e+01
   2.2078813e+01  -2.2193860e+01   0.0000000e+00   4.4201115e+01   7.6449566e+00  -1.0923784e+02
   2.1941309e+01  -2.2214080e+01   0.0000000e+00   5.3540741e+01  -6.0433079e+01  -9.0274135e+01
   2.1804892e+01  -2.2239952e+01   0.0000000e+00   2.9606481e+01  -7.7187079e+01  -4.0189264e+01
   2.1669828e+01  -2.2271426e+01   0.0000000e+00   2.2573614e+01  -6.5708080e+01  -3.0315516e+01
   2.1536382e+01  -2.2308441e+01   0.0000000e+00   6.3735122e+00  -1.0842135e+02  -4.9547908e+01
   2.1404814e+01  -2.2350923e+01   0.0000000e+00  -3.5518866e+01  -1.7339984e+02   5.4610396e+00
   2.1275383e+01  -2.2398790e+01   0.0000000e+00  -7.2322013e+01  -1.6937170e+02   1.0165237e+02
   2.1148344e+01  -2.2451949e+01   0.0000000e+00  -9.6601055e+01  -1.1769037e+02   1.7663015e+02
   2.1023948e+01  -2.2510294e+01   0.0000000e+00  -9.3512665e+01  -5.4170722e+01   2.2907875e+02
   2.0902441e+01  -2.2573713e+01   0.0000000e+00  -5.2711725e+01   7.5159870e-02   2.4654567e+02
   2.0784065e+01  -2.2642079e+01   0.0000000e+00  -4.9480426e+00   2.1495245e+01   2.2375821e+02
   2.0669056e+01  -2.2715259e+01   0.0000000e+00   1.8385727e+01   1.0152381e+01   1.9598348e+02
   2.0557645e+01  -2.2793110e+01   0.0000000e+00   2.4655210e+01  -2.1091366e+00   1.8653377e+02
   2.0450059e+01  -2.2875477e+01   0.0000000e+00   2.7247451e+01  -5.2538526e+00   1.8291377e+02
   2.0346514e+01  -2.2962198e+01   0.0000000e+00   3.4759818e+01  -7.5399335e+00   1.8404208e+02
   2.0247223e+01  -2.3053101e+01   0.0000000e+00   5.5545609e+01  -4.2614517e+00   1.8379948e+02
   2.0152390e+01  -2.3148008e+01   0.0000000e+00   7.7701266e+01   1.9784087e-01   1.6760259e+02
   2.0062213e+01  -2.3246729e+01   0.0000000e+00   8.3007174e+01   2.0140480e+00   1.4801194e+02
   1.9976880e+01  -2.3349068e+01   0.0000000e+00   7.7819684e+01   8.8253183e+00   1.4166454e+02
   1.9896571e+01  -2.3454823e+01   0.0000000e+00   8.7037542e+01   1.6840947e+01   1.3507018e+02
   1.9821459e+01  -2.3563781e+01   0.0000000e+00   1.0384037e+02   1.1602388e+01   1.1153224e+02
   1.9751705e+01  -2.3675726e+01   0.0000000e+00   1.1802473e+02  -1.3565355e+01   8.8652452e+01
   1.9687464e+01  -2.3790433e+01   0.0000000e+00   1.3036759e+02  -5.0116529e+01   5.5718525e+01
   1.9628877e+01  -2.3907671e+01   0.0000000e+00   1.0284024e+02  -8.5380192e+01   1.5538906e+01
   1.9576078e+01  -2.4027205e+01   0.0000000e+00   4.6431390e+01  -9.9536211e+01   1.3833748e+01
   1.9529189e+01  -2.4148793e+01   0.0000000e+00   9.8978813e+00  -9.0816239e+01   3.7710331e+01
   1.9488322e+01  -2.4272190e+01   0.0000000e+00  -2.7983259e+00  -7.8349960e+01   6.4683710e+01
   1.9453576e+01  -2.4397145e+01   0.0000000e+00   1.0034690e+01  -6.6816755e+01   9.0385157e+01
   1.9425041e+01  -2.4523405e+01   0.0000000e+00   3.4805709e+01  -5.2105321e+01   9.9024534e+01
   1.9402792e+01  -2.4650711e+01   0.0000000e+00   6.3992058e+01  -4.0899479e+01   1.0390560e+02
   1.9386895e+01  -2.4778802e+01   0.0000000e+00   1.1366683e+02  -3.9654445e+01   8.7581129e+01
   1.9377401e+01  -2.4907418e+01   0.0000000e+00   1.5176982e+02  -4.8573641e+01   1.6591100e+01
   1.9374351e+01  -2.5036291e+01   0.0000000e+00   1.2876898e+02  -6.3352549e+01  -7.9024141e+01
   1.9377770e+01  -2.5165157e+01   0.0000000e+00   4.4459527e+01  -7.6465469e+01  -1.2167634e+02
   1.9387672e+01  -2.5293749e+01   0.0000000e+00  -2.2055296e+01  -8.0473323e+01  -7.5505457e+01
   1.9404057e+01  -2.5421799e+01   0.0000000e+00  -1.5160636e+00  -7.6119063e+01  -2.1894067e+01
   1.9426911e+01  -2.5549041e+01   0.0000000e+00   3.5966044e+01  -5.3488508e+01  -4.7611140e+01
   1.9456209e+01  -2.5675208e+01   0.0000000e+00   1.8785539e+01  -1.3082622e+01  -8.1504963e+01
   1.9491908e+01  -2.5800036e+01   0.0000000e+00  -4.1342170e+00   1.3483658e+01  -8.4118313e+01
   1.9533954e+01  -2.5923262e+01   0.0000000e+00  -3.0780373e+01   2.5899942e+01  -8.4800201e+01
   1.9714474e+01  -2.6573850e+01   0.0000000e+00  -2.5036472e+01  -6.7635937e+01   6.0277332e+01
   1.9792084e+01  -2.6681696e+01   0.0000000e+00   4.2587186e+01  -1.2205030e+02   2.6660495e+01
   1.9874991e+01  -2.6786394e+01   0.0000000e+00   4.2817803e+01  -1.3349558e+02  -9.7561990e+01
   1.9963048e+01  -2.6887738e+01   0.0000000e+00  -3.3584512e+01  -8.1623849e+01  -1.3510784e+02
   2.0056096e+01  -2.6985528e+01   0.0000000e+00  -6.0191158e+01  -5.6079403e+01  -7.2142304e+01
   2.0153966e+01  -2.7079572e+01   0.0000000e+00  -5.0840357e+01  -5.0602711e+01  -4.3564540e+01
   2.0256476e+01  -2.7169685e+01   0.0000000e+00  -6.3244202e+01  -2.2543974e+01  -2.6519924e+01
   2.0363436e+01  -2.7255686e+01   0.0000000e+00  -6.4534290e+01  -1.3486965e+01   1.2803879e+01
   2.0474643e+01  -2.7337406e+01   0.0000000e+00  -4.0098203e+01  -2.7042465e+01   1.5912233e+01
   2.0589885e+01  -2.7414681e+01   0.0000000e+00  -1.7346045e+01  -2.2679424e+01   9.1622335e+00
   2.0708943e+01  -2.7487358e+01   0.0000000e+00   1.7001697e+01  -2.8230889e+01   6.6531389e+00
   2.0831584e+01  -2.7555290e+01   0.0000000e+00   4.4161562e+01  -2.6910558e+01  -1.3206115e+01
   2.0957571e+01  -2.7618341e+01   0.0000000e+00   5.3070857e+01  -2.4075221e+01  -2.8743767e+01
   2.1086657e+01  -2.7676384e+01   0.0000000e+00   4.5059754e+01  -2.1097138e+01  -4.7627443e+01
   2.1218587e+01  -2.7729303e+01   0.0000000e+00   2.4716521e+01  -2.7675977e+01  -7.2427839e+01
   2.1353099e+01  -2.7776990e+01   0.0000000e+00   3.0710361e+00  -1.1408014e+01  -1.1518122e+02
   2.1489926e+01  -2.7819350e+01   0.0000000e+00  -1.1737409e+01   6.3068425e+01  -1.0713483e+02
   2.1628795e+01  -2.7856296e+01   0.0000000e+00   3.3920803e+00   1.0326281e+02  -1.4729252e+01
   2.1769425e+01  -2.7887753e+01   0.0000000e+00   2.8276273e+01   5.2912803e+01   3.1987804e+01
   2.1911535e+01  -2.7913657e+01   0.0000000e+00   2.5776086e+01   2.8932315e+01   8.3156809e+00
   2.2054838e+01  -2.7933957e+01   0.0000000e+00   1.5261888e+01   3.3629493e+01   4.1815522e+00
   2.2199043e+01  -2.7948610e+01   0.0000000e+00   2.0451194e+01   3.4134514e+01   5.5002068e+00
   2.2343859e+01  -2.7957588e+01   0.0000000e+00   4.5915129e+01   4.5282614e+01   1.1502267e+01
   2.2488992e+01  -2.7960870e+01   0.0000000e+00   4.3004327e+01   4.1946315e+01   6.6065863e+01
   2.2634147e+01  -2.7958452e+01   0.0000000e+00   1.7393137e+01  -6.1466325e+01   5.8973895e+01
   2.2779029e+01  -2.7950337e+01   0.0000000e+00   2.0144839e+01   2.1385691e+01  -1.0089873e+02
   2.2923346e+01  -2.7936543e+01   0.0000000e+00   3.9953079e+01   1.8400123e+02   5.9895087e+01
   2.3066804e+01  -2.7917097e+01   0.0000000e+00   1.1057518e+02  -5.9169615e+01   1.2361346e+02
   2.3209114e+01  -2.7892039e+01   0.0000000e+00   2.0562376e+02   2.5857756e+01  -8.2426699e+01
   2.3349987e+01  -2.7861420e+01   0.0000000e+00   7.0200238e+00   9.6990545e+01   1.9304651e+02
   2.3489141e+01  -2.7825302e+01   0.0000000e+00  -2.1379530e+02  -2.1194812e+02  -1.3493369e+01
   2.3626295e+01  -2.7783759e+01   0.0000000e+00  -1.9605840e+01   1.0491990e+02  -3.0125256e+02
   2.3761176e+01  -2.7736873e+01   0.0000000e+00   5.5850212e+01   2.5256010e+02   9.9369471e+01
   2.3893514e+01  -2.7684741e+01   0.0000000e+00  -3.3057337e+01   2.8322606e+01   2.0120430e+02
   2.4023048e+01  -2.7627467e+01   0.0000000e+00  -4.0687211e+01  -2.8017120e+01   1.3700313e+02
   2.4149521e+01  -2.7565168e+01   0.0000000e+00  -6.8682880e+01  -6.8085940e+01   6.7193977e+01
   2.4272685e+01  -2.7497967e+01   0.0000000e+00  -7.4605793e+01  -3.7023851e+00  -3.9464628e+01
   2.4392301e+01  -2.7426001e+01   0.0000000e+00  -6.0718840e+01   9.8764155e+01   6.4583997e+00
   2.4508136e+01  -2.7349414e+01   0.0000000e+00  -1.2698303e+02   6.2714129e+01   9.8895114e+01
   2.4619969e+01  -2.7268357e+01   0.0000000e+00  -2.2713482e+02   9.1883887e+00  -4.7273657e+01
   2.4727586e+01  -2.7182994e+01   0.0000000e+00  -1.5849978e+02   1.7676144e+02  -2.0102923e+02
   2.4830783e+01  -2.7093494e+01   0.0000000e+00  -7.5430351e+01   3.0560397e+02  -3.6944777e+01
   2.4929369e+01  -2.7000034e+01   0.0000000e+00  -9.0485013e+01   2.1609856e+02   8.7752947e+01
   2.5023159e+01  -2.6902800e+01   0.0000000e+00  -3.5474213e+01   1.0595355e+02   9.2110159e+01
   2.5111984e+01  -2.6801982e+01   0.0000000e+00  -3.1941144e+01   2.8273904e+01   1.0952257e+02
   2.5195681e+01  -2.6697780e+01   0.0000000e+00  -8.4333369e+01   3.5309653e+01   4.6631015e+01
   2.5274103e+01  -2.6590398e+01   0.0000000e+00  -8.8146055e+01   1.0745541e+02   1.5582962e+01
   2.5347112e+01  -2.6480045e+01   0.0000000e+00  -7.4216412e+01   1.2921823e+02   3.5134767e+01
   2.5414581e+01  -2.6366936e+01   0.0000000e+00  -5.2120815e+01   9.0486022e+01   8.1267864e+01
   2.5476398e+01  -2.6251292e+01   0.0000000e+00  -6.0628671e+01   1.7235817e+01   8.9501863e+01
   2.5532459e+01  -2.6133336e+01   0.0000000e+00  -3.0950860e+01  -1.9704369e+01   4.5871747e+01
   2.5582675e+01  -2.6013296e+01   0.0000000e+00   1.3012075e+00  -2.3338705e+01   4.0849620e+01
   2.5626968e+01  -2.5891402e+01   0.0000000e+00   1.3742467e+00  -2.5376527e+01   3.7818039e+01
   2.5665272e+01  -2.5767889e+01   0.0000000e+00   1.3107649e+01  -3.2731042e+01   2.4265621e+01
   2.5697533e+01  -2.5642992e+01   0.0000000e+00   5.5851592e+01  -4.5793183e+01   3.8630384e+01
   2.5723708e+01  -2.5516949e+01   0.0000000e+00   3.9784328e+01  -6.1367082e+01   1.1513141e+02
   2.5743768e+01  -2.5390000e+01   0.0000000e+00  -7.4797303e+01  -7.2806720e+01   9.3135352e+01
   2.5757695e+01  -2.5262384e+01   0.0000000e+00  -6.0684406e+01  -5.6261272e+01  -1.3658657e+01
   2.5765480e+01  -2.5134343e+01   0.0000000e+00  -3.1623480e+00  -2.2135839e+01   2.0710181e+01
   2.5767130e+01  -2.5006116e+01   0.0000000e+00  -3.4242561e+01  -1.6041212e+01   3.8181206e+01
   2.5762661e+01  -2.4877945e+01   0.0000000e+00  -2.8974070e+01  -1.0539138e+01   6.7027037e+00
   2.5752099e+01  -2.4750069e+01   0.0000000e+00   4.8314204e+00   1.4777889e+01  -2.3936469e+01
   2.5735483e+01  -2.4622726e+01   0.0000000e+00   7.4928494e+01   4.2456875e+01   1.0139706e+01
   2.5712863e+01  -2.4496152e+01   0.0000000e+00   6.1190429e+01   6.5596789e+01   1.1089515e+02
   2.5684298e+01  -2.4370582e+01   0.0000000e+00  -3.1888029e+01   6.0891847e+01   1.2926524e+02
   2.5649858e+01  -2.4246248e+01   0.0000000e+00  -4.9393403e+01   1.0449273e+01   6.3557663e+01
   2.5609623e+01  -2.4123378e+01   0.0000000e+00   7.4801157e+00  -1.1178682e+01   1.1828992e+02
   2.5563683e+01  -2.4002198e+01   0.0000000e+00  -1.0862811e+02   3.3738540e+01   1.6875123e+02
   2.5512139e+01  -2.3882929e+01   0.0000000e+00  -2.0736231e+02   7.8517816e+00   1.9257650e+01
   2.5455099e+01  -2.3765790e+01   0.0000000e+00  -1.7272234e+02  -2.0339683e+01  -8.7588460e+01
   2.5392680e+01  -2.3650995e+01   0.0000000e+00  -1.0074312e+02   1.4912100e+00  -1.7373481e+02
   2.5325011e+01  -2.3538751e+01   0.0000000e+00   2.8618122e+01  -1.0727500e+01  -1.8230257e+02
   2.5252227e+01  -2.3429262e+01   0.0000000e+00   6.7957931e+01  -2.1256783e+01  -9.8892408e+01
   2.5174470e+01  -2.3322726e+01   0.0000000e+00   4.8666849e+01  -1.6432623e+01  -5.1129690e+01
   2.5091893e+01  -2.3219335e+01   0.0000000e+00   4.1082856e+01   1.0598322e+01  -3.4286769e+01
   2.5004655e+01  -2.3119276e+01   0.0000000e+00   5.4223575e+01  -3.0167106e+00  -2.3854921e+01
   2.4912921e+01  -2.3022729e+01   0.0000000e+00   4.0467828e+01  -3.8299432e+01   4.1820235e+01
   2.4816865e+01  -2.2929866e+01   0.0000000e+00  -1.6557449e+01  -3.5328517e+01   6.5590934e+01
   2.4716668e+01  -2.2840855e+01   0.0000000e+00  -5.2702425e+01  -2.8417306e+01   2.3314403e+01
   2.4612515e+01  -2.2755854e+01   0.0000000e+00  -4.9647962e+01  -3.4214074e+01  -3.2244055e+01
   2.4504600e+01  -2.2675015e+01   0.0000000e+00  -1.5139757e+01  -5.2137099e+01  -2.2212790e+01
   2.4393119e+01  -2.2598482e+01   0.0000000e+00  -2.8160197e+01  -2.8782002e+01   1.8776233e+01
   2.4278276e+01  -2.2526391e+01   0.0000000e+00  -5.2413817e+01  -1.4093132e+01  -2.2200694e+01
   2.4160281e+01  -2.2458871e+01   0.0000000e+00  -3.2983775e+01  -4.1536934e+01  -4.3749066e+01
   2.4039345e+01  -2.2396042e+01   0.0000000e+00  -3.1902431e+01  -2.7931061e+01  -2.3916589e+01
   2.3915687e+01  -2.2338014e+01   0.0000000e+00  -4.0917431e+01  -1.6312038e+01  -7.1212685e+01
   2.3789528e+01  -2.2284891e+01   0.0000000e+00   5.4987181e+00  -1.0312247e+02  -7.5526107e+01
   2.3661093e+01  -2.2236767e+01   0.0000000e+00  -1.9710657e+01  -1.2488459e+02   8.4513089e+01
   2.3530612e+01  -2.2193726e+01   0.0000000e+00  -1.3350150e+02  -1.2197609e+01   1.1977288e+02
   2.3398314e+01  -2.2155846e+01   0.0000000e+00  -1.3073330e+02   2.3513434e+01  -7.4008764e+00
   2.3264435e+01  -2.2123192e+01   0.0000000e+00  -1.1956552e+02  -2.3441621e+01  -9.0057678e+01
   2.3129212e+01  -2.2095823e+01   0.0000000e+00  -1.7438306e+02  -1.0803261e+02  -9.4625802e+01
   2.2992881e+01  -2.2073786e+01   0.0000000e+00  -1.7931239e+02  -1.4778626e+02   1.1637991e+01
   2.2855685e+01  -2.2057121e+01   0.0000000e+00  -1.3426788e+02  -6.6333720e+01   9.4896088e+01
   2.2717864e+01  -2.2045857e+01   0.0000000e+00  -8.0636280e+01  -4.0959656e+00   5.2161581e+01
   2.2579660e+01  -2.2040014e+01   0.0000000e+00  -4.1758131e+01  -2.6518700e+01   2.0378489e+01
   2.2441316e+01  -2.2039602e+01   0.0000000e+00  -1.8691873e+01  -1.8429224e+01   4.6031982e+01
   2.2303075e+01  -2.2044622e+01   0.0000000e+00   1.2754420e+01   3.2420730e+01   1.7324130e+01
   2.2165180e+01  -2.2055065e+01   0.0000000e+00   5.2087063e+01   1.0924773e+01  -4.3011479e+01
   2.2027873e+01  -2.2070913e+01   0.0000000e+00   7.3260627e+01  -3.7122511e+01  -2.9917352e+01
   2.1891396e+01  -2.2092137e+01   0.0000000e+00   5.8898718e+01  -4.3535364e+01  -1.6183591e+01
   2.1755989e+01  -2.2118700e+01   0.0000000e+00   2.9925177e+01  -5.4976772e+01  -1.6892667e+01
   2.1621891e+01  -2.2150556e+01   0.0000000e+00   1.6273848e+01  -6.0373623e+01  -1.5648163e+01
   2.1489339e+01  -2.2187648e+01   0.0000000e+00  -5.3801343e+00  -9.4003557e+01  -2.6075198e+01
   2.1358566e+01  -2.2229911e+01   0.0000000e+00  -4.3181560e+01  -1.4319624e+02   1.8239788e+01
   2.1229806e+01  -2.2277270e+01   0.0000000e+00  -6.4939883e+01  -1.3691305e+02   9.1924784e+01
   2.1103288e+01  -2.2329641e+01   0.0000000e+00  -7.4001205e+01  -9.3999670e+01   1.3438861e+02
   2.0979236e+01  -2.2386931e+01   0.0000000e+00  -8.0804580e+01  -4.9342384e+01   1.5792520e+02
   2.0857874e+01  -2.2449039e+01   0.0000000e+00  -7.6811187e+01  -6.8778122e+00   1.7793000e+02
   2.0739418e+01  -2.2515856e+01   0.0000000e+00  -5.9149105e+01   2.3146047e+01   1.8279461e+02
   2.0624084e+01  -2.2587261e+01   0.0000000e+00  -4.0060629e+01   2.6994653e+01   1.7719225e+02
   2.0512081e+01  -2.2663129e+01   0.0000000e+00  -2.4085765e+01   2.0948014e+01   1.7414654e+02
   2.0403611e+01  -2.2743324e+01   0.0000000e+00  -9.6419026e+00   1.4143388e+01   1.6502572e+02
   2.0298876e+01  -2.2827704e+01   0.0000000e+00   3.1104596e+00   1.9590145e-01   1.5850396e+02
   2.0198066e+01  -2.2916117e+01   0.0000000e+00   2.3196441e+01  -7.3612346e+00   1.6544848e+02
   2.0101371e+01  -2.3008406e+01   0.0000000e+00   4.9565105e+01   8.1099715e-01   1.6711355e+02
   2.0008971e+01  -2.3104406e+01   0.0000000e+00   6.8980270e+01   1.5332980e+01   1.5626010e+02
   1.9921040e+01  -2.3203944e+01   0.0000000e+00   7.4560594e+01   3.3602432e+01   1.3128405e+02
   1.9837745e+01  -2.3306841e+01   0.0000000e+00   6.3964757e+01   4.1885779e+01   1.0511559e+02
   1.9759248e+01  -2.3412912e+01   0.0000000e+00   6.4985817e+01   3.5211199e+01   9.4325374e+01
   1.9685700e+01  -2.3521966e+01   0.0000000e+00   7.5412993e+01   2.2900899e+01   8.0177911e+01
   1.9617246e+01  -2.3633805e+01   0.0000000e+00   7.5763319e+01   7.3428920e+00   7.1422165e+01
   1.9554023e+01  -2.3748227e+01   0.0000000e+00   7.9396837e+01  -1.2212062e+01   6.4246022e+01
   1.9496160e+01  -2.3865024e+01   0.0000000e+00   7.0602192e+01  -3.4671286e+01   4.3186152e+01
   1.9443775e+01  -2.3983984e+01   0.0000000e+00   3.9039360e+01  -4.7173199e+01   3.2128588e+01
   1.9396979e+01  -2.4104888e+01   0.0000000e+00   9.7914151e+00  -4.9940014e+01   4.0766968e+01
   1.9355873e+01  -2.4227516e+01   0.0000000e+00  -4.1994548e+00  -5.1653147e+01   6.1207019e+01
   1.9320549e+01  -2.4351643e+01   0.0000000e+00   6.9787216e+00  -4.8788487e+01   8.6150351e+01
   1.9291088e+01  -2.4477041e+01   0.0000000e+00   3.6503887e+01  -4.0018939e+01   9.1321788e+01
   1.9267562e+01  -2.4603478e+01   0.0000000e+00   6.2793152e+01  -2.4880336e+01   8.6553435e+01
   1.9250032e+01  -2.4730719e+01   0.0000000e+00   9.5777794e+01  -5.2830224e+00   7.4802009e+01
   1.9238550e+01  -2.4858530e+01   0.0000000e+00   1.2384570e+02  -8.7628361e+00   3.1882747e+01
   1.9233154e+01  -2.4986671e+01   0.0000000e+00   1.2162053e+02  -3.9943740e+01  -3.8207750e+01
   1.9233875e+01  -2.5114905e+01   0.0000000e+00   6.7878662e+01  -6.5823398e+01  -9.2627814e+01
   1.9240730e+01  -2.5242990e+01   0.0000000e+00  -5.1612256e-01  -6.7788854e+01  -7.7928048e+01
   1.9253725e+01  -2.5370685e+01   0.0000000e+00  -9.0746853e+00  -5.6601036e+01  -1.7735741e+01
   1.9272856e+01  -2.5497751e+01   0.0000000e+00   4.6410287e+01  -5.0213648e+01  -1.1519052e+01
   1.9298106e+01  -2.5623947e+01   0.0000000e+00   6.7519713e+01  -3.4712595e+01  -7.8937429e+01
   1.9329446e+01  -2.5749033e+01   0.0000000e+00   3.3842940e+01  -5.8468432e-01  -1.2625315e+02
   1.9366837e+01  -2.5872771e+01   0.0000000e+00  -1.3637503e+01   2.0843324e+01  -1.2722126e+02
   1.9410225e+01  -2.5994925e+01   0.0000000e+00  -4.7478244e+01   1.4593422e+01  -9.7330989e+01
   1.9459548e+01  -2.6115262e+01   0.0000000e+00  -5.0687450e+01   1.7028310e+01  -7.4953679e+01
   1.9514729e+01  -2.6233549e+01   0.0000000e+00  -6.1040457e+01   2.3890881e+01  -5.0985106e+01
   1.9575679e+01  -2.6349558e+01   0.0000000e+00  -6.8717413e+01  -6.4482528e+00  -1.0032594e+01
   1.9642298e+01  -2.6463065e+01   0.0000000e+00  -6.0956767e+01  -3.8871827e+01   2.3202867e+01
   1.9948419e+01  -2.7071110e+01   0.0000000e+00  -4.5787516e+01  -7.7625432e+01  -2.4706639e+01
   2.0046386e+01  -2.7165472e+01   0.0000000e+00  -2.2267381e+01  -5.5961139e+01  -3.3437257e+01
   2.0148837e+01  -2.7256058e+01   0.0000000e+00  -2.5600682e+01  -1.1885520e+01  -4.1023265e+01
   2.0255598e+01  -2.7342702e+01   0.0000000e+00  -4.0758998e+01   1.5342834e+01   2.7472066e+00
   2.0366482e+01  -2.7425244e+01   0.0000000e+00  -2.7712957e+01  -1.7027154e+01   3.3563041e+01
   2.0481296e+01  -2.7503533e+01   0.0000000e+00  -9.1508149e+00  -3.5681249e+01   1.6964809e+01
   2.0599836e+01  -2.7577424e+01   0.0000000e+00   2.0311746e+01  -5.0035627e+01  -4.2230626e+00
   2.0721891e+01  -2.7646780e+01   0.0000000e+00   4.8846434e+01  -5.1223090e+01  -5.3515591e+01
   2.0847241e+01  -2.7711473e+01   0.0000000e+00   6.6657364e+01  -3.3830492e+01  -8.6061316e+01
   2.0975661e+01  -2.7771382e+01   0.0000000e+00   7.1410576e+01  -5.8721545e+00  -1.1120131e+02
   2.1106917e+01  -2.7826395e+01   0.0000000e+00   3.6856904e+01   1.6222095e+01  -9.2251389e+01
   2.1240769e+01  -2.7876411e+01   0.0000000e+00   7.1060376e+00  -5.7772547e+00  -7.1250645e+01
   2.1376971e+01  -2.7921334e+01   0.0000000e+00  -1.7563010e+00   8.0578963e+00  -8.8409220e+01
   2.1515271e+01  -2.7961082e+01   0.0000000e+00   1.0424997e+01   6.2780001e+01  -7.6043933e+01
   2.1655413e+01  -2.7995579e+01   0.0000000e+00   3.6093387e+01   7.9157293e+01  -2.2688846e+01
   2.1797138e+01  -2.8024762e+01   0.0000000e+00   3.9034313e+01   4.8177668e+01  -2.5105619e+00
   2.1940180e+01  -2.8048574e+01   0.0000000e+00   3.1870440e+01   4.3265283e+01  -6.4673600e+00
   2.2084271e+01  -2.8066971e+01   0.0000000e+00   1.9474251e+01   4.0816077e+01   1.4064612e+01
   2.2229144e+01  -2.8079920e+01   0.0000000e+00   2.6661559e+01   1.2263331e+01   1.0039099e+01
   2.2374524e+01  -2.8087394e+01   0.0000000e+00   3.8074825e+01   4.4456195e+01  -2.8599846e+00
   2.2520141e+01  -2.8089380e+01   0.0000000e+00   4.7414809e+01   2.7146418e+01   9.0959908e+01
   2.2665719e+01  -2.8085875e+01   0.0000000e+00   8.2985196e+01  -8.5879920e+01   2.5875365e+01
   2.2810986e+01  -2.8076885e+01   0.0000000e+00   8.3344315e+01   6.0665627e+01  -1.0109087e+02
   2.2955670e+01  -2.8062427e+01   0.0000000e+00   1.2765470e+02   1.0065396e+02   1.1470440e+02
   2.3099498e+01  -2.8042528e+01   0.0000000e+00   1.4462510e+02  -1.6818826e+02  -3.2869062e+01
   2.3242202e+01  -2.8017226e+01   0.0000000e+00   1.2032645e+02   1.5336539e+02  -3.5410448e+02
   2.3383515e+01  -2.7986567e+01   0.0000000e+00   1.3757112e+01   3.2062249e+02   1.7367299e+02
   2.3523174e+01  -2.7950611e+01   0.0000000e+00  -2.1120201e+02  -1.9449674e+02   1.7283971e+02
   2.3660920e+01  -2.7909424e+01   0.0000000e+00  -1.3051886e+02   1.3335913e+01  -2.9873914e+02
   2.3796496e+01  -2.7863083e+01   0.0000000e+00   2.3765311e+01   2.5388904e+02   5.0024004e+00
   2.3929654e+01  -2.7811676e+01   0.0000000e+00  -8.1306551e+00   1.4946790e+01   1.5828107e+02
   2.4060150e+01  -2.7755298e+01   0.0000000e+00  -8.2317738e+00  -4.5302790e+01   6.3122425e+01
   2.4187744e+01  -2.7694055e+01   0.0000000e+00  -3.6018393e+01  -3.4403532e+01   1.8787573e+01
   2.4312205e+01  -2.7628060e+01   0.0000000e+00  -7.9547595e+01   3.3619359e+01  -4.0360351e+01
   2.4433310e+01  -2.7557436e+01   0.0000000e+00  -7.4953541e+01   1.0827773e+02  -8.4229570e+00
   2.4550840e+01  -2.7482315e+01   0.0000000e+00  -6.5899960e+01   8.5912782e+01   8.1389381e+01
   2.4664587e+01  -2.7402835e+01   0.0000000e+00  -1.2320699e+02   3.1358930e+01   8.0047570e+01
   2.4774350e+01  -2.7319142e+01   0.0000000e+00  -1.4836355e+02   1.2568455e+02  -6.9195007e+00
   2.4879937e+01  -2.7231392e+01   0.0000000e+00  -7.4421488e+01   2.4758955e+02   7.5513726e+01
   2.4981165e+01  -2.7139745e+01   0.0000000e+00  -6.9916956e+01   1.7242318e+02   2.2584117e+02
   2.5077861e+01  -2.7044369e+01   0.0000000e+00  -1.0638877e+02   5.0986420e+01   1.6549505e+02
   2.5169861e+01  -2.6945437e+01   0.0000000e+00  -5.8581460e+01   4.1019302e+01   6.6055609e+01
   2.5257010e+01  -2.6843131e+01   0.0000000e+00  -4.7441238e+01   6.9022036e+01   6.6951787e+01
   2.5339165e+01  -2.6737636e+01   0.0000000e+00  -5.5402647e+01   1.0014771e+02   9.3213204e+01
   2.5416191e+01  -2.6629143e+01   0.0000000e+00  -6.2082651e+01   1.0127574e+02   1.5232287e+02
   2.5487966e+01  -2.6517847e+01   0.0000000e+00  -8.1113727e+01   4.9986455e+01   1.6447435e+02
   2.5554375e+01  -2.6403948e+01   0.0000000e+00  -8.0801964e+01  -2.0243466e+01   1.3273531e+02
   2.5615318e+01  -2.6287652e+01   0.0000000e+00  -7.9406574e+01  -7.0170327e+01   4.9518460e+01
   2.5670702e+01  -2.6169165e+01   0.0000000e+00  -2.4307964e+01  -6.4209694e+01  -1.7201547e+01
   2.5720446e+01  -2.6048698e+01   0.0000000e+00   1.5387168e+01  -4.9921680e+01   6.0337841e+00
   2.5764481e+01  -2.5926466e+01   0.0000000e+00   9.5849655e+00  -5.1324010e+01   3.2486794e+01
   2.5802745e+01  -2.5802684e+01   0.0000000e+00   5.1533333e+00  -5.5946775e+01   2.2138141e+01
   2.5835191e+01  -2.5677571e+01   0.0000000e+00   3.8445943e+01  -5.5864712e+01   1.3280939e+01
   2.5861780e+01  -2.5551347e+01   0.0000000e+00   5.1336919e+01  -5.6232563e+01   7.3773603e+01
   2.5882485e+01  -2.5424232e+01   0.0000000e+00  -4.4285715e+01  -4.6367498e+01   9.2538486e+01
   2.5897288e+01  -2.5296449e+01   0.0000000e+00  -6.0786258e+01  -2.4356615e+01  -1.1644331e+01
   2.5906183e+01  -2.5168220e+01   0.0000000e+00   9.4224914e+00  -1.0079412e+01   1.1974251e+01
   2.5909172e+01  -2.5039767e+01   0.0000000e+00  -3.9289018e+01  -2.4179896e+01   3.4999895e+01
   2.5906269e+01  -2.4911313e+01   0.0000000e+00  -1.6660036e+01  -2.8079635e+01  -2.0486818e+01
   2.5897498e+01  -2.4783078e+01   0.0000000e+00   2.8914644e+01   1.3381134e+01  -1.9406492e+01
   2.5882891e+01  -2.4655284e+01   0.0000000e+00   8.4426742e+01   4.6328471e+01   8.3355930e+00
   2.5862492e+01  -2.4528148e+01   0.0000000e+00   8.6161715e+01   5.6405823e+01   1.1423802e+02
   2.5836353e+01  -2.4401889e+01   0.0000000e+00  -2.2604985e+01   5.5175145e+01   1.6308504e+02
   2.5804534e+01  -2.4276721e+01   0.0000000e+00  -1.2520553e+02   3.3822673e+01   6.2417035e+01
   2.5767107e+01  -2.4152857e+01   0.0000000e+00  -4.1702863e+01  -4.3663283e+01  -3.0057425e+01
   2.5724151e+01  -2.4030507e+01   0.0000000e+00  -1.0271299e+01  -4.4354286e+01   1.3098077e+02
   2.5675754e+01  -2.3909876e+01   0.0000000e+00  -2.0668450e+02   4.0300315e+01   9.7414777e+01
   2.5622011e+01  -2.3791169e+01   0.0000000e+00  -2.0020469e+02   2.2041411e+01  -1.2316951e+02
   2.5563027e+01  -2.3674584e+01   0.0000000e+00  -8.7921651e+01   4.9545298e+00  -1.7194913e+02
   2.5498915e+01  -2.3560318e+01   0.0000000e+00   1.0289703e+01   2.1180250e+01  -1.7571081e+02
   2.5429794e+01  -2.3448561e+01   0.0000000e+00   8.5664790e+01   1.4405498e+01  -9.9512733e+01
   2.5355792e+01  -2.3339499e+01   0.0000000e+00   5.9757133e+01   7.2813258e+00  -3.8289131e+01
   2.5277042e+01  -2.3233315e+01   0.0000000e+00   5.3011589e+01  -1.0588701e+01  -1.4583898e+01
   2.5193686e+01  -2.3130184e+01   0.0000000e+00   3.0824517e+01   1.2632110e+00   2.2126099e+01
   2.5105873e+01  -2.3030278e+01   0.0000000e+00  -5.2219755e+00  -1.1514775e+01   4.7948172e+00
   2.5013755e+01  -2.2933761e+01   0.0000000e+00  -3.1154181e+01  -4.8525980e+01  -6.1848019e+00
   2.4917495e+01  -2.2840793e+01   0.0000000e+00  -4.7908586e+01  -5.2291884e+01  -2.2823141e+01
   2.4817258e+01  -2.2751528e+01   0.0000000e+00  -3.0271884e+01  -3.2396984e+01  -4.1774001e+01
   2.4713215e+01  -2.2666113e+01   0.0000000e+00  -4.4155043e-01  -1.2472528e+01  -5.4979657e+01
   2.4605544e+01  -2.2584686e+01   0.0000000e+00   3.9408466e+00  -2.4953310e+01  -3.4304188e+01
   2.4494428e+01  -2.2507383e+01   0.0000000e+00  -4.1408524e+01  -2.6864252e+01  -1.0939510e+01
   2.4380052e+01  -2.2434330e+01   0.0000000e+00  -5.4275637e+01  -1.7209168e+01  -5.2649830e+01
   2.4262609e+01  -2.2365647e+01   0.0000000e+00  -1.8589244e+01  -3.9444060e+01  -6.8010365e+01
   2.4142293e+01  -2.2301445e+01   0.0000000e+00  -1.7560341e+01  -3.4501165e+01  -3.0617627e+01
   2.4019305e+01  -2.2241829e+01   0.0000000e+00  -3.5765969e+01  -2.7228003e+00  -7.2092171e+01
   2.3893846e+01  -2.2186898e+01   0.0000000e+00   6.1508491e+00  -6.5842498e+01  -1.1500089e+02
   2.3766125e+01  -2.2136739e+01   0.0000000e+00  -7.6295192e-01  -8.5185214e+01   6.4636947e+00
   2.3636349e+01  -2.2091435e+01   0.0000000e+00  -1.3453684e+02   1.0896190e+01  -7.5643053e+00
   2.3504731e+01  -2.2051060e+01   0.0000000e+00  -1.3447584e+02  -2.7102995e+01  -1.1105972e+02
   2.3371486e+01  -2.2015679e+01   0.0000000e+00  -4.4141996e+01  -2.0412234e+01  -7.1883317e+01
   2.3236830e+01  -2.1985350e+01   0.0000000e+00  -3.9176348e+01   2.5500375e+01  -1.4406669e+02
   2.3100982e+01  -2.1960121e+01   0.0000000e+00  -5.9492880e+01  -7.3132513e+01  -2.0644232e+02
   2.2964163e+01  -2.1940034e+01   0.0000000e+00  -8.6090028e+01  -1.3283853e+02  -1.0850416e+02
   2.2826593e+01  -2.1925122e+01   0.0000000e+00  -8.9339550e+01  -8.4341605e+01  -2.5207149e+01
   2.2688496e+01  -2.1915408e+01   0.0000000e+00  -5.3158076e+01  -5.1574408e+01  -1.1421226e+01
   2.2550094e+01  -2.1910909e+01   0.0000000e+00  -2.3420021e+01  -5.5273096e+01   8.5857817e+00
   2.2411611e+01  -2.1911631e+01   0.0000000e+00  -2.7706726e+00  -3.6699573e+01   4.1890229e+01
   2.2273271e+01  -2.1917574e+01   0.0000000e+00   3.1368249e+01  -4.2626141e+00   3.4625425e+01
   2.2135297e+01  -2.1928727e+01   0.0000000e+00   5.1879069e+01  -1.7169127e+01   1.7776375e+01
   2.1997912e+01  -2.1945073e+01   0.0000000e+00   4.2650384e+01  -2.5987852e+01   2.9807488e+01
   2.1861340e+01  -2.1966586e+01   0.0000000e+00   3.5108768e+01  -2.2583266e+01   1.2998048e+01
   2.1725799e+01  -2.1993229e+01   0.0000000e+00   2.7584464e+01  -4.0229290e+01  -2.7722795e+00
   2.1591512e+01  -2.2024961e+01   0.0000000e+00   1.3663604e+01  -4.8611625e+01  -5.0050977e+00
   2.1458695e+01  -2.2061730e+01   0.0000000e+00  -4.5975662e+00  -7.2751865e+01  -2.0229420e+01
   2.1327566e+01  -2.2103475e+01   0.0000000e+00  -3.6936042e+01  -1.1797501e+02   1.2081466e+00
   2.1198337e+01  -2.2150129e+01   0.0000000e+00  -5.7634798e+01  -1.2408323e+02   6.6817545e+01
   2.1071220e+01  -2.2201616e+01   0.0000000e+00  -5.9992781e+01  -8.8416432e+01   1.1706360e+02
   2.0946424e+01  -2.2257853e+01   0.0000000e+00  -5.8264179e+01  -4.8832506e+01   1.4129720e+02
   2.0824155e+01  -2.2318747e+01   0.0000000e+00  -5.7009529e+01  -9.4749558e+00   1.4832674e+02
   2.0704614e+01  -2.2384199e+01   0.0000000e+00  -5.9314935e+01   2.1789505e+01   1.3963821e+02
   2.0588000e+01  -2.2454103e+01   0.0000000e+00  -6.3164569e+01   3.3062490e+01   1.3223858e+02
   2.0474506e+01  -2.2528343e+01   0.0000000e+00  -6.3350294e+01   3.2904629e+01   1.3553342e+02
   2.0364324e+01  -2.2606800e+01   0.0000000e+00  -5.4034904e+01   2.2724782e+01   1.4008956e+02
   2.0257639e+01  -2.2689343e+01   0.0000000e+00  -3.5678844e+01   2.2542549e-01   1.4931865e+02
   2.0154632e+01  -2.2775838e+01   0.0000000e+00  -1.1592995e+01  -1.7740719e+01   1.7191476e+02
   2.0055477e+01  -2.2866142e+01   0.0000000e+00   2.3544594e+01  -1.2088088e+01   1.9151099e+02
   1.9960346e+01  -2.2960106e+01   0.0000000e+00   5.5486354e+01   1.1409109e+01   1.8249751e+02
   1.9869404e+01  -2.3057577e+01   0.0000000e+00   7.3762422e+01   3.6524994e+01   1.5197161e+02
   1.9782808e+01  -2.3158392e+01   0.0000000e+00   7.8265494e+01   4.8190067e+01   1.0244069e+02
   1.9700711e+01  -2.3262384e+01   0.0000000e+00   6.1621004e+01   3.6291064e+01   6.8621030e+01
   1.9623261e+01  -2.3369382e+01   0.0000000e+00   5.6724616e+01   2.4457023e+01   7.0691913e+01
   1.9550595e+01  -2.3479208e+01   0.0000000e+00   6.5781894e+01   2.2709076e+01   6.4784986e+01
   1.9482847e+01  -2.3591678e+01   0.0000000e+00   6.0508900e+01   2.0813722e+01   4.9953175e+01
   1.9420141e+01  -2.3706605e+01   0.0000000e+00   4.9927049e+01   1.2085756e+01   4.4463651e+01
   1.9362596e+01  -2.3823796e+01   0.0000000e+00   4.4097595e+01  -3.6199069e+00   4.0499428e+01
   1.9310322e+01  -2.3943055e+01   0.0000000e+00   2.8940702e+01  -1.5422772e+01   3.1138437e+01
   1.9263420e+01  -2.4064182e+01   0.0000000e+00   2.8457038e+00  -2.5247463e+01   3.3328303e+01
   1.9221985e+01  -2.4186972e+01   0.0000000e+00  -1.2442068e+01  -3.5634825e+01   5.6077215e+01
   1.9186102e+01  -2.4311218e+01   0.0000000e+00  -1.6620336e+00  -4.1155714e+01   8.5550226e+01
   1.9155847e+01  -2.4436709e+01   0.0000000e+00   3.2329480e+01  -4.3003594e+01   9.7560274e+01
   1.9131290e+01  -2.4563232e+01   0.0000000e+00   7.5447704e+01  -3.3199990e+01   8.5962600e+01
   1.9112488e+01  -2.4690571e+01   0.0000000e+00   1.1087161e+02  -2.7246814e+00   4.0267198e+01
   1.9099491e+01  -2.4818509e+01   0.0000000e+00   1.0416062e+02   7.1037855e+00  -1.4714827e+01
   1.9092340e+01  -2.4946827e+01   0.0000000e+00   8.7285562e+01  -2.5381422e+01  -4.1489623e+01
   1.9091065e+01  -2.5075303e+01   0.0000000e+00   6.4930891e+01  -6.0194336e+01  -6.8060318e+01
   1.9095686e+01  -2.5203716e+01   0.0000000e+00   2.1403196e+01  -7.0423041e+01  -7.2501684e+01
   1.9106215e+01  -2.5331844e+01   0.0000000e+00  -7.7743115e-01  -5.8650826e+01  -4.1188209e+01
   1.9122651e+01  -2.5459465e+01   0.0000000e+00   2.9975369e+01  -4.9338077e+01  -1.5811609e+01
   1.9144986e+01  -2.5586355e+01   0.0000000e+00   6.9308925e+01  -5.7031816e+01  -5.2962327e+01
   1.9173198e+01  -2.5712294e+01   0.0000000e+00   6.3313055e+01  -6.0423272e+01  -1.2295730e+02
   1.9207258e+01  -2.5837061e+01   0.0000000e+00   1.4646332e+01  -3.5305029e+01  -1.7298326e+02
   1.9247123e+01  -2.5960436e+01   0.0000000e+00  -5.3490124e+01  -7.0032672e+00  -1.4465742e+02
   1.9292743e+01  -2.6082202e+01   0.0000000e+00  -6.2630948e+01  -8.8319787e+00  -8.0312612e+01
   1.9344055e+01  -2.6202142e+01   0.0000000e+00  -5.7665068e+01  -9.1922156e+00  -8.0486254e+01
   1.9400984e+01  -2.6320044e+01   0.0000000e+00  -1.0229954e+02  -1.4969770e+00  -5.2636439e+01
   1.9463449e+01  -2.6435698e+01   0.0000000e+00  -1.0450635e+02  -2.8757380e+01   2.9703130e+01
   1.9531353e+01  -2.6548897e+01   0.0000000e+00  -6.0127910e+01  -5.4154978e+01   7.3285022e+01
   1.9604592e+01  -2.6659438e+01   0.0000000e+00  -6.9645660e+00  -6.5944093e+01   8.7690967e+01
   1.9683050e+01  -2.6767121e+01   0.0000000e+00   3.7565643e+01  -1.0428992e+02   5.0215840e+01
   1.9766599e+01  -2.6871753e+01   0.0000000e+00   1.0337722e+01  -1.2837969e+02  -3.4237486e+01
   1.9855105e+01  -2.6973144e+01   0.0000000e+00  -4.9940997e+01  -1.0204844e+02  -5.0832215e+01
   2.0276273e+01  -2.7525541e+01   0.0000000e+00  -1.9409905e+01   9.1573744e-01   2.4494897e+01
   2.0391263e+01  -2.7604104e+01   0.0000000e+00  -9.2019968e+00  -3.3301423e+01   1.5382236e+01
   2.0509864e+01  -2.7678433e+01   0.0000000e+00  -1.8968377e-01  -6.7929956e+01  -1.1348985e+01
   2.0631879e+01  -2.7748401e+01   0.0000000e+00   5.8326669e+00  -9.2731254e+01  -7.7111557e+01
   2.0757106e+01  -2.7813887e+01   0.0000000e+00   1.0487851e+01  -9.3197380e+01  -1.4242366e+02
   2.0885336e+01  -2.7874777e+01   0.0000000e+00   1.0104454e+01  -6.0570512e+01  -2.1287831e+02
   2.1016352e+01  -2.7930967e+01   0.0000000e+00  -2.1660839e+01   8.1473332e+00  -1.8879104e+02
   2.1149934e+01  -2.7982360e+01   0.0000000e+00  -2.9894155e+00   8.9985351e-01  -9.8611559e+01
   2.1285852e+01  -2.8028866e+01   0.0000000e+00   3.6518274e+01   2.2591401e+00  -8.6212716e+01
   2.1423876e+01  -2.8070404e+01   0.0000000e+00   2.5298376e+01   3.6260431e+01  -7.5186128e+01
   2.1563767e+01  -2.8106902e+01   0.0000000e+00   2.8394053e+01   5.4132169e+01  -6.5607512e+01
   2.1705286e+01  -2.8138297e+01   0.0000000e+00   3.7779599e+01   6.6782028e+01  -3.8125955e+01
   2.1848187e+01  -2.8164533e+01   0.0000000e+00   3.5851018e+01   4.4373037e+01  -2.7374132e+01
   2.1992222e+01  -2.8185565e+01   0.0000000e+00   2.9436214e+01   6.0379662e+01  -1.8096841e+01
   2.2137143e+01  -2.8201357e+01   0.0000000e+00   2.5892797e+01   2.4402535e+01   3.1695681e+01
   2.2282695e+01  -2.8211879e+01   0.0000000e+00   4.1727767e+01   3.1410196e+00  -5.9683775e+00
   2.2428627e+01  -2.8217116e+01   0.0000000e+00   7.3421767e+01   2.7556931e+01   6.3910317e+01
   2.2574683e+01  -2.8217055e+01   0.0000000e+00   1.8295890e+02  -9.5683416e+01   5.3323631e+01
   2.2720608e+01  -2.8211700e+01   0.0000000e+00   1.5658008e+02  -1.6720733e+01  -1.3933392e+02
   2.2866149e+01  -2.8201057e+01   0.0000000e+00   8.0588158e+01   8.1157987e+01  -8.0657944e+01
   2.3011052e+01  -2.8185146e+01   0.0000000e+00   1.9498718e+02  -6.4785948e+01  -8.8747303e+01
   2.3155065e+01  -2.8163996e+01   0.0000000e+00   8.3697506e+01   4.4338028e+01  -3.3381553e+02
   2.3297937e+01  -2.8137642e+01   0.0000000e+00  -1.2065420e+02   4.3845820e+02  -1.9869465e+02
   2.3439422e+01  -2.8106131e+01   0.0000000e+00  -9.8243678e+01   2.6284666e+02   3.2796990e+02
   2.3579274e+01  -2.8069518e+01   0.0000000e+00  -1.7758520e+02  -1.7519855e+02   1.7933105e+02
   2.3717252e+01  -2.8027866e+01   0.0000000e+00  -1.9376315e+02   6.2388613e+01  -1.4760187e+02
   2.3853120e+01  -2.7981249e+01   0.0000000e+00  -7.9046417e+01   1.8332625e+02   7.2173075e+01
   2.3986646e+01  -2.7929747e+01   0.0000000e+00  -6.2574846e+01  -1.6887649e+01   1.0906970e+02
   2.4117601e+01  -2.7873449e+01   0.0000000e+00  -4.5135679e+01  -2.6680816e+01  -8.1919235e+00
   2.4245765e+01  -2.7812453e+01   0.0000000e+00  -4.1109505e+01   3.8458802e+01  -1.0423380e+01
   2.4370922e+01  -2.7746865e+01   0.0000000e+00  -7.3816201e+01   1.0171471e+02   4.0842801e+01
   2.4492862e+01  -2.7676797e+01   0.0000000e+00  -9.4797215e+01   1.1626191e+02   1.0340857e+02
   2.4611383e+01  -2.7602370e+01   0.0000000e+00  -9.8179137e+01   7.3793111e+01   1.2261961e+02
   2.4726290e+01  -2.7523713e+01   0.0000000e+00  -8.8408225e+01   2.3017557e+01   7.9603606e+01
   2.4837393e+01  -2.7440959e+01   0.0000000e+00  -4.8708164e+01   6.6426852e+01   5.3203763e+01
   2.4944514e+01  -2.7354250e+01   0.0000000e+00  -4.3822901e+00   1.2097793e+02   1.3464513e+02
   2.5047479e+01  -2.7263734e+01   0.0000000e+00   5.7956947e+00   6.4538422e+01   2.2321014e+02
   2.5146126e+01  -2.7169566e+01   0.0000000e+00  -4.3205282e+01  -1.3374338e+01   1.9500091e+02
   2.5240299e+01  -2.7071903e+01   0.0000000e+00  -5.7697552e+01   1.6670606e+01   9.7119321e+01
   2.5329851e+01  -2.6970912e+01   0.0000000e+00  -3.1929733e+01   7.8257817e+01   1.1493230e+02
   2.5414645e+01  -2.6866763e+01   0.0000000e+00  -4.0002807e+01   6.0877726e+01   1.6635891e+02
   2.5494552e+01  -2.6759630e+01   0.0000000e+00  -2.6469690e+01   2.3649757e+01   1.8368382e+02
   2.5569454e+01  -2.6649693e+01   0.0000000e+00  -4.8574928e+01  -2.5691279e+01   1.9809033e+02
   2.5639242e+01  -2.6537136e+01   0.0000000e+00  -8.0465992e+01  -8.3028646e+01   1.3004829e+02
   2.5703813e+01  -2.6422145e+01   0.0000000e+00  -7.8410027e+01  -9.5415995e+01   4.3485504e+01
   2.5763079e+01  -2.6304912e+01   0.0000000e+00  -6.7731489e+01  -6.4882772e+01  -3.2380968e+01
   2.5816957e+01  -2.6185630e+01   0.0000000e+00  -2.3147778e+01  -3.6474225e+01  -5.2439131e+01
   2.5865377e+01  -2.6064495e+01   0.0000000e+00   7.7346795e-01  -5.2973710e+01  -2.6645229e+01
   2.5908276e+01  -2.5941708e+01   0.0000000e+00   6.4071649e+00  -7.9373258e+01  -1.3622558e+01
   2.5945602e+01  -2.5817467e+01   0.0000000e+00   1.5226885e+01  -8.1630857e+01  -1.6661151e+01
   2.5977311e+01  -2.5691977e+01   0.0000000e+00   4.1664619e+01  -7.0356233e+01  -8.3156150e+00
   2.6003372e+01  -2.5565441e+01   0.0000000e+00   5.8424537e+01  -7.2659654e+01   4.4393646e+01
   2.6023759e+01  -2.5438065e+01   0.0000000e+00  -7.5253544e+00  -6.2219335e+01   8.9443564e+01
   2.6038458e+01  -2.5310053e+01   0.0000000e+00  -4.3288588e+01  -3.1256122e+01   1.8946502e+01
   2.6047463e+01  -2.5181612e+01   0.0000000e+00   4.4859265e+00  -2.0991244e+01   2.8986841e+01
   2.6050779e+01  -2.5052948e+01   0.0000000e+00  -5.7299264e+01  -3.7561370e+01   1.7473933e+01
   2.6048417e+01  -2.4924267e+01   0.0000000e+00   6.8746889e-03  -3.3620016e+01  -7.3304475e+01
   2.6040400e+01  -2.4795773e+01   0.0000000e+00   7.4911234e+01   9.2436608e+00  -1.6320340e+01
   2.6026758e+01  -2.4667672e+01   0.0000000e+00   9.4248639e+01   3.5436255e+01   3.8851356e+01
   2.6007529e+01  -2.4540166e+01   0.0000000e+00   9.1939351e+01   4.0212298e+01   1.3188534e+02
   2.5982761e+01  -2.4413457e+01   0.0000000e+00  -6.5041808e+00   4.7332205e+01   1.7647624e+02
   2.5952508e+01  -2.4287744e+01   0.0000000e+00  -1.1899885e+02   7.6580316e+01   1.1280349e+02
   2.5916835e+01  -2.4163224e+01   0.0000000e+00  -1.2058880e+02   6.6140283e+01  -6.6446670e+01
   2.5875813e+01  -2.4040093e+01   0.0000000e+00   2.2464880e+01  -2.4298531e+01  -2.4493355e+01
   2.5829521e+01  -2.3918543e+01   0.0000000e+00  -1.0266513e+02   1.1428988e+01   1.3952438e+02
   2.5778045e+01  -2.3798764e+01   0.0000000e+00  -2.2440433e+02   7.1761296e+01  -3.9112287e+01
   2.5721479e+01  -2.3680941e+01   0.0000000e+00  -9.4559910e+01   3.5315387e+01  -1.6445417e+02
   2.5659924e+01  -2.3565257e+01   0.0000000e+00   3.9913901e+00   1.5675050e+01  -1.3259904e+02
   2.5593487e+01  -2.3451890e+01   0.0000000e+00   6.4967262e+01   1.9177291e+00  -6.8680569e+01
   2.5522283e+01  -2.3341017e+01   0.0000000e+00   3.9127570e+01  -1.8286799e+00  -5.8791537e+00
   2.5446433e+01  -2.3232808e+01   0.0000000e+00   1.1129115e+01  -1.7531018e+01  -3.0614276e+01
   2.5366063e+01  -2.3127428e+01   0.0000000e+00   2.4966854e+01  -3.8971455e+01  -5.0553273e+00
   2.5281307e+01  -2.3025039e+01   0.0000000e+00  -2.2835846e+01  -1.5013906e+01   7.5001805e+00
   2.5192303e+01  -2.2925798e+01   0.0000000e+00  -4.0378959e+01  -1.3404305e+01  -5.6178662e+01
   2.5099196e+01  -2.2829857e+01   0.0000000e+00  -1.9687721e+01  -2.3793727e+01  -8.3570207e+01
   2.5002135e+01  -2.2737362e+01   0.0000000e+00   6.7738563e-01  -2.9092044e+01  -8.2937398e+01
   2.4901275e+01  -2.2648453e+01   0.0000000e+00   2.8115733e+01  -2.9705658e+01  -4.4785759e+01
   2.4796777e+01  -2.2563265e+01   0.0000000e+00   2.5353803e+01  -4.3705605e+00   4.3312724e+00
   2.4688803e+01  -2.2481928e+01   0.0000000e+00  -2.6671147e+01   9.1057094e+00  -1.0188171e+00
   2.4577524e+01  -2.2404565e+01   0.0000000e+00  -5.7363449e+01  -9.8304380e+00  -6.1881997e+01
   2.4463110e+01  -2.2331292e+01   0.0000000e+00  -1.7024035e+01  -2.4142997e+01  -9.4475132e+01
   2.4345741e+01  -2.2262222e+01   0.0000000e+00   2.5871866e+00  -2.2656880e+01  -8.7465756e+01
   2.4225595e+01  -2.2197457e+01   0.0000000e+00  -1.6287459e+01  -3.2827227e+01  -9.0057934e+01
   2.4102858e+01  -2.2137095e+01   0.0000000e+00   1.5736619e+01  -1.1790296e+01  -1.1845526e+02
   2.3977715e+01  -2.2081227e+01   0.0000000e+00   8.4326980e+01  -2.9385077e+01  -1.3910361e+02
   2.3850358e+01  -2.2029938e+01   0.0000000e+00   6.8918920e+01  -3.4143813e+01  -1.7540956e+01
   2.3720978e+01  -2.1983304e+01   0.0000000e+00  -5.0174823e+01   9.6364699e+01  -5.7280494e+01
   2.3589772e+01  -2.1941395e+01   0.0000000e+00  -4.3985899e+01   1.0733290e+01  -2.2841903e+02
   2.3456937e+01  -2.1904275e+01   0.0000000e+00   1.3457047e+01  -8.7671466e+01  -9.5827654e+01
   2.3322672e+01  -2.1871998e+01   0.0000000e+00   5.8424475e+00   1.2498640e+01  -3.8477466e+01
   2.3187180e+01  -2.1844614e+01   0.0000000e+00   3.9700627e+01   3.9443546e+00  -1.2811483e+02
   2.3050662e+01  -2.1822163e+01   0.0000000e+00   5.3745684e+01  -6.4368362e+01  -1.2463292e+02
   2.2913322e+01  -2.1804679e+01   0.0000000e+00   1.8646211e+01  -7.8806783e+01  -7.8692110e+01
   2.2775366e+01  -2.1792188e+01   0.0000000e+00  -6.8714542e+00  -7.1531382e+01  -4.1281243e+01
   2.2637000e+01  -2.1784709e+01   0.0000000e+00  -1.0975709e+01  -6.7061400e+01  -8.6381738e+00
   2.2498430e+01  -2.1782252e+01   0.0000000e+00  -8.0144679e+00  -6.4680040e+01   2.1492185e+01
   2.2359861e+01  -2.1784823e+01   0.0000000e+00   2.5920118e+00  -4.7311000e+01   5.4895248e+01
   2.2221502e+01  -2.1792416e+01   0.0000000e+00   1.7235276e+01  -1.9464453e+01   6.3789951e+01
   2.2083558e+01  -2.1805020e+01   0.0000000e+00   1.6544781e+01  -8.8045318e+00   4.7415220e+01
   2.1946235e+01  -2.1822617e+01   0.0000000e+00   1.2752695e+01  -1.7353965e+01   2.4308824e+01
   2.1809738e+01  -2.1845180e+01   0.0000000e+00   2.7248302e+01  -3.2781830e+01   2.0960083e+01
   2.1674271e+01  -2.1872676e+01   0.0000000e+00   2.5410002e+01  -2.9094637e+01   1.8628460e+01
   2.1540036e+01  -2.1905063e+01   0.0000000e+00   5.6736096e+00  -3.7068416e+01   1.7067065e+00
   2.1407236e+01  -2.1942292e+01   0.0000000e+00  -7.8307792e+00  -6.8507693e+01  -8.5966158e+00
   2.1276069e+01  -2.1984309e+01   0.0000000e+00  -2.2095205e+01  -1.1415624e+02   1.0414012e+01
   2.1146733e+01  -2.2031049e+01   0.0000000e+00  -2.8124754e+01  -1.1842654e+02   7.0574876e+01
   2.1019424e+01  -2.2082443e+01   0.0000000e+00  -3.8755924e+01  -7.2010763e+01   1.1047944e+02
   2.0894334e+01  -2.2138413e+01   0.0000000e+00  -5.7244785e+01  -2.9824300e+01   1.2973765e+02
   2.0771653e+01  -2.2198876e+01   0.0000000e+00  -6.2640347e+01   6.9427826e+00   1.3922044e+02
   2.0651568e+01  -2.2263739e+01   0.0000000e+00  -5.9054404e+01   3.1796611e+01   1.2733843e+02
   2.0534263e+01  -2.2332907e+01   0.0000000e+00  -6.0398474e+01   4.1227212e+01   1.0949159e+02
   2.0419919e+01  -2.2406273e+01   0.0000000e+00  -6.9532917e+01   4.1950569e+01   9.6039555e+01
   2.0308713e+01  -2.2483727e+01   0.0000000e+00  -7.9610098e+01   2.6521568e+01   9.5894052e+01
   2.0200816e+01  -2.2565153e+01   0.0000000e+00  -7.7879274e+01   2.9017702e+00   1.2506951e+02
   2.0096398e+01  -2.2650427e+01   0.0000000e+00  -6.3275854e+01  -7.8088403e+00   1.6842245e+02
   1.9995623e+01  -2.2739418e+01   0.0000000e+00  -3.4504472e+01  -1.8165324e+00   2.0965853e+02
   1.9898650e+01  -2.2831994e+01   0.0000000e+00   1.3618636e+01   2.1353901e+01   2.2057415e+02
   1.9805634e+01  -2.2928011e+01   0.0000000e+00   5.3041954e+01   4.4548201e+01   1.8655470e+02
   1.9716725e+01  -2.3027325e+01   0.0000000e+00   7.1808175e+01   5.0682051e+01   1.3445939e+02
   1.9632067e+01  -2.3129783e+01   0.0000000e+00   7.1787061e+01   3.6035716e+01   8.8169460e+01
   1.9551798e+01  -2.3235229e+01   0.0000000e+00   5.8774685e+01   2.0241739e+01   7.2466875e+01
   1.9476052e+01  -2.3343501e+01   0.0000000e+00   5.8991799e+01   2.1221126e+01   7.0958602e+01
   1.9404954e+01  -2.3454432e+01   0.0000000e+00   6.5945279e+01   2.4613841e+01   5.2560058e+01
   1.9338627e+01  -2.3567853e+01   0.0000000e+00   5.8290203e+01   2.2466737e+01   2.6469950e+01
   1.9277184e+01  -2.3683587e+01   0.0000000e+00   3.8471827e+01   1.5912441e+01   1.8983747e+01
   1.9220732e+01  -2.3801457e+01   0.0000000e+00   2.8508517e+01   1.2041254e+01   2.3712035e+01
   1.9169372e+01  -2.3921279e+01   0.0000000e+00   1.3610365e+01   4.5853126e+00   1.7408370e+01
   1.9123198e+01  -2.4042867e+01   0.0000000e+00  -1.2372153e+01  -1.2195217e+01   2.5789272e+01
   1.9082297e+01  -2.4166031e+01   0.0000000e+00  -2.4397946e+01  -2.4613901e+01   5.7774608e+01
   1.9046746e+01  -2.4290580e+01   0.0000000e+00  -1.3367852e+01  -2.9708635e+01   9.2233462e+01
   1.9016617e+01  -2.4416318e+01   0.0000000e+00   1.9177022e+01  -3.8611133e+01   1.1649509e+02
   1.8991974e+01  -2.4543048e+01   0.0000000e+00   8.3456183e+01  -4.2551286e+01   1.0977149e+02
   1.8972871e+01  -2.4670569e+01   0.0000000e+00   1.3576162e+02  -2.9869754e+01   2.6289104e+01
   1.8959356e+01  -2.4798682e+01   0.0000000e+00   9.8889452e+01  -3.0572048e+01  -5.6546307e+01
   1.8951466e+01  -2.4927181e+01   0.0000000e+00   5.6416869e+01  -5.2718567e+01  -5.1983489e+01
   1.8949233e+01  -2.5055864e+01   0.0000000e+00   4.8781132e+01  -7.0608941e+01  -4.6772969e+01
   1.8952678e+01  -2.5184526e+01   0.0000000e+00   2.5061930e+01  -7.9166095e+01  -4.8978682e+01
   1.8961812e+01  -2.5312959e+01   0.0000000e+00   9.2410363e+00  -7.8455086e+01  -3.4945611e+01
   1.8976640e+01  -2.5440959e+01   0.0000000e+00   2.6520298e+01  -7.1174889e+01  -2.1073551e+01
   1.8997156e+01  -2.5568319e+01   0.0000000e+00   5.2545989e+01  -6.7226730e+01  -4.1969644e+01
   1.9023345e+01  -2.5694833e+01   0.0000000e+00   4.7162672e+01  -8.5084446e+01  -7.4493738e+01
   1.9055182e+01  -2.5820297e+01   0.0000000e+00   3.0238280e+01  -1.0317682e+02  -1.1977480e+02
   1.9092635e+01  -2.5944507e+01   0.0000000e+00  -2.3825860e+01  -7.4149712e+01  -1.4878155e+02
   1.9135659e+01  -2.6067259e+01   0.0000000e+00  -6.5122904e+01  -2.8087459e+01  -1.0234664e+02
   1.9184203e+01  -2.6188354e+01   0.0000000e+00  -6.1271872e+01  -2.2185460e+01  -6.9852622e+01
   1.9238205e+01  -2.6307592e+01   0.0000000e+00  -1.0071156e+02  -2.3512835e+01  -6.6279258e+01
   1.9297592e+01  -2.6424776e+01   0.0000000e+00  -1.3519565e+02  -2.0863300e+01   2.1597951e+01
   1.9362282e+01  -2.6539714e+01   0.0000000e+00  -7.3635376e+01  -3.4948246e+01   1.0377508e+02
   1.9432187e+01  -2.6652214e+01   0.0000000e+00  -2.6575657e+00  -3.8749075e+01   1.0415054e+02
   1.9507204e+01  -2.6762089e+01   0.0000000e+00   3.1533468e+01  -4.3047872e+01   7.1415146e+01
   1.9587223e+01  -2.6869156e+01   0.0000000e+00   2.8428831e+01  -6.9213012e+01   2.9745947e+01
   1.9672127e+01  -2.6973236e+01   0.0000000e+00  -1.8824604e+00  -8.2106938e+01  -1.3095140e+00
   1.9761785e+01  -2.7074154e+01   0.0000000e+00  -1.9213250e+01  -6.9089566e+01   6.4331486e+00
   1.9856060e+01  -2.7171739e+01   0.0000000e+00  -5.1588197e+00  -6.8948215e+01   2.8939043e+00
   1.9954807e+01  -2.7265827e+01   0.0000000e+00   7.0674759e+00  -6.1670468e+01  -3.5601311e+01
   2.0057868e+01  -2.7356258e+01   0.0000000e+00  -8.9085178e+00  -1.9607424e+01  -7.5077808e+01
   2.0165081e+01  -2.7442878e+01   0.0000000e+00  -3.6455813e+01   2.4911876e+01  -3.1969017e+01
   2.0686306e+01  -2.7925669e+01   0.0000000e+00  -1.0917476e+02  -1.4407704e+02  -8.9080540e+01
   2.0814779e+01  -2.7986786e+01   0.0000000e+00  -1.4791989e+02  -1.4071696e+02  -1.5639322e+02
   2.0945959e+01  -2.8043369e+01   0.0000000e+00  -1.6192496e+02  -8.3929251e+01  -1.2010238e+02
   2.1079638e+01  -2.8095326e+01   0.0000000e+00  -6.1963354e+01  -1.0502873e+02  -6.4112646e+01
   2.1215606e+01  -2.8142574e+01   0.0000000e+00   5.7939002e+01  -6.8775018e+01  -1.5276074e+02
   2.1353647e+01  -2.8185037e+01   0.0000000e+00   7.4273852e+01   5.9250478e+01  -1.3319422e+02
   2.1493540e+01  -2.8222644e+01   0.0000000e+00   5.2577624e+01   5.7436848e+01  -7.0999146e+01
   2.1635060e+01  -2.8255337e+01   0.0000000e+00   4.0313002e+01   6.7284388e+01  -7.9589588e+01
   2.1777982e+01  -2.8283060e+01   0.0000000e+00   2.4516882e+01   6.0607068e+01  -4.3297802e+01
   2.1922073e+01  -2.8305770e+01   0.0000000e+00   1.2796580e+01   5.3094450e+01  -4.4938451e+01
   2.2067101e+01  -2.8323429e+01   0.0000000e+00   2.1784917e+01   4.4977647e+01   1.9617465e+01
   2.2212832e+01  -2.8336008e+01   0.0000000e+00   4.2290032e+01  -1.8153070e+01   9.6403542e+00
   2.2359029e+01  -2.8343488e+01   0.0000000e+00   8.2259406e+01  -3.2683021e+01   3.6335497e+01
   2.2505454e+01  -2.8345856e+01   0.0000000e+00   2.5932526e+02  -1.9783975e+02  -7.4552886e+01
   2.2651871e+01  -2.8343107e+01   0.0000000e+00   2.6647948e+02   1.6281203e+01  -3.9546347e+02
   2.2798041e+01  -2.8335247e+01   0.0000000e+00   1.5089503e+01   2.2770759e+02  -1.2836032e+02
   2.2943728e+01  -2.8322288e+01   0.0000000e+00   1.2867568e+01  -1.2543456e+02  -1.0856035e+02
   2.3088695e+01  -2.8304252e+01   0.0000000e+00   8.7114849e+01   5.4545599e+01  -4.9757864e+02
   2.3232707e+01  -2.8281167e+01   0.0000000e+00  -8.5861382e+01   5.3085247e+02  -1.7508429e+02
   2.3375531e+01  -2.8253072e+01   0.0000000e+00  -1.6296602e+02   3.7877680e+02   3.7561255e+02
   2.3516939e+01  -2.8220012e+01   0.0000000e+00  -6.3891623e+01  -4.7153119e+01   3.6300751e+02
   2.3656701e+01  -2.8182041e+01   0.0000000e+00  -1.0098587e+02  -6.5187207e+01   1.0334246e+02
   2.3794595e+01  -2.8139219e+01   0.0000000e+00  -1.3226113e+02   1.0253673e+02   1.0793280e+02
   2.3930400e+01  -2.8091618e+01   0.0000000e+00  -7.5952073e+01   4.3656508e+01   1.8950018e+02
   2.4063901e+01  -2.8039313e+01   0.0000000e+00  -8.4681757e+01  -3.3193579e+01   1.1374923e+02
   2.4194885e+01  -2.7982389e+01   0.0000000e+00  -8.4984086e+01   6.0598520e+00   2.9513195e+01
   2.4323149e+01  -2.7920938e+01   0.0000000e+00  -4.1866060e+01   6.4514232e+01   4.6631737e+01
   2.4448489e+01  -2.7855059e+01   0.0000000e+00  -7.8520439e+00   7.3248744e+01   1.3059958e+02
   2.4570713e+01  -2.7784858e+01   0.0000000e+00   5.6956603e+00   4.1802014e+01   1.8129651e+02
   2.4689631e+01  -2.7710446e+01   0.0000000e+00  -2.7390958e+01   2.4050185e+01   1.9378822e+02
   2.4805061e+01  -2.7631944e+01   0.0000000e+00  -8.7617714e+01  -1.6021586e+00   1.2053594e+02
   2.4916827e+01  -2.7549475e+01   0.0000000e+00  -4.7742794e+01   2.8212571e+01   3.2840228e+01
   2.5024761e+01  -2.7463172e+01   0.0000000e+00   2.1834642e+01   4.7296477e+01   7.9673454e+01
   2.5128703e+01  -2.7373171e+01   0.0000000e+00   3.3309452e+01   5.8448052e-01   1.3316873e+02
   2.5228498e+01  -2.7279614e+01   0.0000000e+00   1.2930184e+01  -2.7892903e+01   1.3066818e+02
   2.5324001e+01  -2.7182650e+01   0.0000000e+00  -7.4987929e+00   6.1402498e+00   1.1928153e+02
   2.5415073e+01  -2.7082429e+01   0.0000000e+00   2.6844813e-01   2.7268835e+01   1.6235631e+02
   2.5501585e+01  -2.6979111e+01   0.0000000e+00  -8.2176605e+00  -2.8055364e+01   1.9784612e+02
   2.5583414e+01  -2.6872856e+01   0.0000000e+00  -5.9637876e+00  -6.9905108e+01   1.5786926e+02
   2.5660449e+01  -2.6763829e+01   0.0000000e+00  -1.1351161e-02  -7.8054367e+01   1.5616185e+02
   2.5732583e+01  -2.6652200e+01   0.0000000e+00  -6.1806561e+01  -1.0371414e+02   1.1458440e+02
   2.5799720e+01  -2.6538143e+01   0.0000000e+00  -7.3753257e+01  -8.4497592e+01   6.6877685e+00
   2.5861772e+01  -2.6421832e+01   0.0000000e+00  -6.1759758e+01  -3.7866772e+01  -3.2108422e+01
   2.5918660e+01  -2.6303447e+01   0.0000000e+00  -5.3009030e+01  -1.3273839e+01  -4.2947192e+01
   2.5970313e+01  -2.6183169e+01   0.0000000e+00  -4.3292988e+01  -2.1732740e+01  -4.0226575e+01
   2.6016669e+01  -2.6061182e+01   0.0000000e+00  -3.6679883e+01  -5.2511981e+01  -6.1315183e+01
   2.6057675e+01  -2.5937671e+01   0.0000000e+00  -1.0920219e+01  -7.4838760e+01  -7.9762526e+01
   2.6093286e+01  -2.5812825e+01   0.0000000e+00   2.5169919e+01  -8.0373253e+01  -6.9817052e+01
   2.6123465e+01  -2.5686832e+01   0.0000000e+00   4.4436227e+01  -7.6711146e+01  -3.8017749e+01
   2.6148185e+01  -2.5559882e+01   0.0000000e+00   5.3047680e+01  -8.4316532e+01  -4.5600021e+00
   2.6167426e+01  -2.5432165e+01   0.0000000e+00   1.5913315e+01  -7.8567078e+01   3.7556034e+01
   2.6181176e+01  -2.5303873e+01   0.0000000e+00  -1.3108430e+01  -5.0640680e+01   9.2132604e+00
   2.6189434e+01  -2.5175198e+01   0.0000000e+00  -1.1250464e+00  -4.2349072e+01   2.5216403e+01
   2.6192204e+01  -2.5046330e+01   0.0000000e+00  -5.3497101e+01  -3.0426522e+01  -2.2145337e+01
   2.6189500e+01  -2.4917461e+01   0.0000000e+00   3.8042887e+01   1.5234654e+00  -9.2199436e+01
   2.6181342e+01  -2.4788782e+01   0.0000000e+00   9.9993795e+01   1.5074576e+01   9.1894511e+00
   2.6167759e+01  -2.4660481e+01   0.0000000e+00   9.1485523e+01   8.6616604e+00   5.9709380e+01
   2.6148789e+01  -2.4532749e+01   0.0000000e+00   9.7887018e+01   1.3772641e+01   1.4072442e+02
   2.6124475e+01  -2.4405771e+01   0.0000000e+00   7.7167299e+00   4.2525337e+01   1.8664966e+02
   2.6094868e+01  -2.4279733e+01   0.0000000e+00  -6.7970599e+01   7.7873156e+01   1.6967953e+02
   2.6060027e+01  -2.4154819e+01   0.0000000e+00  -1.3001789e+02   1.2995518e+02   7.2477476e+01
   2.6020018e+01  -2.4031210e+01   0.0000000e+00  -3.8333078e+01   7.1589703e+01  -2.0271209e+01
   2.5974912e+01  -2.3909085e+01   0.0000000e+00  -5.9006614e+01   1.0072863e+01   1.1401647e+02
   2.5924790e+01  -2.3788621e+01   0.0000000e+00  -2.2388492e+02   4.0543113e+01   3.5368662e+01
   2.5869736e+01  -2.3669991e+01   0.0000000e+00  -1.4002397e+02   1.7904006e+01  -1.3007157e+02
   2.5809843e+01  -2.3553365e+01   0.0000000e+00  -3.6908963e+01  -1.9421389e+01  -1.2588687e+02
   2.5745208e+01  -2.3438912e+01   0.0000000e+00   1.8989340e+01  -5.1044846e+01  -9.8591651e+01
   2.5675937e+01  -2.3326794e+01   0.0000000e+00   3.2962207e+01  -4.1639557e+01  -3.7368327e+01
   2.5602138e+01  -2.3217172e+01   0.0000000e+00  -1.3518942e+00  -8.4733063e+00  -4.8765768e+01
   2.5523926e+01  -2.3110201e+01   0.0000000e+00   2.0523618e+01  -2.4003209e+01  -6.6824087e+01
   2.5441424e+01  -2.3006035e+01   0.0000000e+00   1.3856905e+01  -2.1903396e+01  -2.8518932e+01
   2.5354757e+01  -2.2904819e+01   0.0000000e+00  -5.9115385e+00   1.6435851e+01  -5.7427715e+01
   2.5264056e+01  -2.2806699e+01   0.0000000e+00   2.5998822e+01   2.2679602e+01  -8.3816941e+01
   2.5169457e+01  -2.2711812e+01   0.0000000e+00   3.1667297e+01   2.1555187e+01  -6.7818384e+01
   2.5071102e+01  -2.2620292e+01   0.0000000e+00   2.8684264e+01  -5.8536781e+00  -6.4197643e+01
   2.4969133e+01  -2.2532269e+01   0.0000000e+00   2.4769142e+01  -3.0705393e+01  -9.4703620e+00
   2.4863703e+01  -2.2447865e+01   0.0000000e+00  -4.1476524e+01  -7.0216752e+00   2.0376464e+01
   2.4754962e+01  -2.2367199e+01   0.0000000e+00  -8.5668006e+01   5.0390059e+00  -6.1131773e+01
   2.4643070e+01  -2.2290385e+01   0.0000000e+00  -2.2080319e+01  -2.9060357e+01  -1.3435855e+02
   2.4528186e+01  -2.2217530e+01   0.0000000e+00   5.8244040e+01  -3.5076038e+01  -8.3705822e+01
   2.4410476e+01  -2.2148736e+01   0.0000000e+00   4.3866596e+01   2.5743108e+01  -7.6111238e+01
   2.4290106e+01  -2.2084099e+01   0.0000000e+00   6.3714099e+01  -8.4148879e+00  -1.5797567e+02
   2.4167247e+01  -2.2023709e+01   0.0000000e+00   1.7435939e+02  -3.6556093e+01  -8.6562828e+01
   2.4042073e+01  -2.1967650e+01   0.0000000e+00   2.0061925e+02   1.8892323e+01   8.7339878e+00
   2.3914760e+01  -2.1916000e+01   0.0000000e+00   1.1216687e+02   4.7832414e+01   6.8705684e+01
   2.3785486e+01  -2.1868832e+01   0.0000000e+00   1.8343981e+01   1.4405259e+02  -9.4834337e+00
   2.3654432e+01  -2.1826210e+01   0.0000000e+00   5.4141801e+01   7.1225948e+01  -1.7586595e+02
   2.3521781e+01  -2.1788195e+01   0.0000000e+00   5.6050006e+01  -5.0098384e+01  -9.0701083e+01
   2.3387718e+01  -2.1754838e+01   0.0000000e+00  -5.5617762e+00  -1.2565102e+01  -3.8036608e+01
   2.3252428e+01  -2.1726186e+01   0.0000000e+00   1.9453215e+01  -2.4997779e+01  -6.8210810e+01
   2.3116098e+01  -2.1702278e+01   0.0000000e+00   5.4582863e+01  -5.4210841e+01  -3.4575731e+01
   2.2978918e+01  -2.1683149e+01   0.0000000e+00   4.9944892e+01  -4.6940222e+01  -7.5792963e+00
   2.2841078e+01  -2.1668824e+01   0.0000000e+00   2.2603730e+01  -4.1569487e+01  -1.0830422e+01
   2.2702767e+01  -2.1659323e+01   0.0000000e+00  -1.3736041e+00  -5.5191460e+01  -1.0334863e+01
   2.2564176e+01  -2.1654660e+01   0.0000000e+00  -6.4506399e+00  -6.7027588e+01   9.0836606e+00
   2.2425496e+01  -2.1654840e+01   0.0000000e+00  -3.9740091e+00  -6.3253991e+01   4.2656678e+01
   2.2286920e+01  -2.1659864e+01   0.0000000e+00  -7.7436525e+00  -3.4728506e+01   6.6439518e+01
   2.2148637e+01  -2.1669725e+01   0.0000000e+00  -9.0315633e+00  -9.8318442e+00   5.7529825e+01
   2.2010839e+01  -2.1684408e+01   0.0000000e+00   7.9124425e-01  -1.4713560e+01   2.8378061e+01
   2.1873716e+01  -2.1703895e+01   0.0000000e+00   1.7687767e+01  -4.5829521e+01   3.3579796e+01
   2.1737458e+01  -2.1728157e+01   0.0000000e+00   2.6411076e+01  -2.8831542e+01   6.1765742e+01
   2.1602252e+01  -2.1757160e+01   0.0000000e+00   1.2601140e+01  -4.6638035e+00   2.7100410e+01
   2.1468288e+01  -2.1790866e+01   0.0000000e+00  -1.0211986e+01  -3.0978747e+01  -5.5690539e+00
   2.1335749e+01  -2.1829227e+01   0.0000000e+00  -2.8614108e+01  -7.7972825e+01  -6.7507545e+00
   2.1204822e+01  -2.1872189e+01   0.0000000e+00  -2.7979598e+01  -1.3250883e+02   5.1866428e+01
   2.1075688e+01  -2.1919694e+01   0.0000000e+00  -1.1717380e+01  -1.0010459e+02   1.3255123e+02
   2.0948528e+01  -2.1971674e+01   0.0000000e+00  -1.7978277e+01  -3.0883702e+01   1.3264946e+02
   2.0823520e+01  -2.2028059e+01   0.0000000e+00  -4.4209443e+01   5.8986347e+00   1.0991049e+02
   2.0700841e+01  -2.2088768e+01   0.0000000e+00  -6.6720202e+01   3.1504766e+01   9.8492363e+01
   2.0580663e+01  -2.2153718e+01   0.0000000e+00  -7.5513174e+01   4.8153917e+01   9.3524799e+01
   2.0463158e+01  -2.2222818e+01   0.0000000e+00  -7.7923744e+01   5.7880751e+01   8.4402600e+01
   2.0348491e+01  -2.2295971e+01   0.0000000e+00  -8.0106868e+01   5.1854386e+01   6.7579610e+01
   2.0236828e+01  -2.2373076e+01   0.0000000e+00  -8.8173960e+01   2.7612885e+01   6.4185149e+01
   2.0128329e+01  -2.2454024e+01   0.0000000e+00  -9.7671877e+01   1.0290800e+01   9.6816206e+01
   2.0023151e+01  -2.2538701e+01   0.0000000e+00  -9.9032385e+01   1.4490756e+01   1.3853568e+02
   1.9921446e+01  -2.2626990e+01   0.0000000e+00  -8.8769221e+01   2.4592600e+01   1.7842241e+02
   1.9823365e+01  -2.2718765e+01   0.0000000e+00  -5.2951514e+01   4.5492623e+01   2.0966415e+02
   1.9729052e+01  -2.2813897e+01   0.0000000e+00  -1.6654306e+00   6.6860990e+01   1.9984172e+02
   1.9638647e+01  -2.2912253e+01   0.0000000e+00   3.3444532e+01   6.6602378e+01   1.5770530e+02
   1.9552286e+01  -2.3013693e+01   0.0000000e+00   4.9112109e+01   4.9566986e+01   1.1912807e+02
   1.9470099e+01  -2.3118074e+01   0.0000000e+00   5.0488891e+01   3.3511669e+01   9.5110125e+01
   1.9392212e+01  -2.3225247e+01   0.0000000e+00   5.0884615e+01   2.7129119e+01   8.2823716e+01
   1.9318746e+01  -2.3335061e+01   0.0000000e+00   5.7822913e+01   2.3455160e+01   6.6934077e+01
   1.9249816e+01  -2.3447358e+01   0.0000000e+00   6.5600230e+01   1.6361885e+01   4.4112064e+01
   1.9185531e+01  -2.3561979e+01   0.0000000e+00   5.8787081e+01   9.6532662e+00   1.8475754e+01
   1.9125995e+01  -2.3678760e+01   0.0000000e+00   4.2664090e+01   1.1744702e+01   8.8130915e+00
   1.9071306e+01  -2.3797532e+01   0.0000000e+00   2.6075679e+01   1.8005004e+01  -3.4948899e+00
   1.9021554e+01  -2.3918126e+01   0.0000000e+00  -4.8010570e+00   6.1187111e+00  -5.0959130e+00
   1.8976826e+01  -2.4040367e+01   0.0000000e+00  -2.8315046e+01  -7.7451878e+00   2.3822781e+01
   1.8937199e+01  -2.4164080e+01   0.0000000e+00  -3.1353620e+01  -9.5486319e+00   6.0266700e+01
   1.8902746e+01  -2.4289084e+01   0.0000000e+00  -2.3682662e+01  -9.5698705e+00   9.0455100e+01
   1.8873531e+01  -2.4415198e+01   0.0000000e+00   8.9598297e-01  -2.0157248e+01   1.2804539e+02
   1.8849613e+01  -2.4542239e+01   0.0000000e+00   7.5622811e+01  -3.7204863e+01   1.3545880e+02
   1.8831043e+01  -2.4670020e+01   0.0000000e+00   1.3311715e+02  -5.8491013e+01   4.6645803e+01
   1.8817863e+01  -2.4798355e+01   0.0000000e+00   8.7563740e+01  -7.8428919e+01  -2.9797365e+01
   1.8810111e+01  -2.4927055e+01   0.0000000e+00   4.9675466e+01  -8.0795581e+01  -1.6590113e+01
   1.8807813e+01  -2.5055931e+01   0.0000000e+00   4.4940445e+01  -7.4217922e+01  -1.9090178e+01
   1.8810992e+01  -2.5184791e+01   0.0000000e+00   1.9994909e+01  -7.6995347e+01  -2.2332462e+01
   1.8819658e+01  -2.5313444e+01   0.0000000e+00   6.9799216e+00  -8.3692041e+01  -6.8940328e+00
   1.8833818e+01  -2.5441700e+01   0.0000000e+00   2.8350990e+01  -9.1042326e+01   3.9698010e+00
   1.8853467e+01  -2.5569366e+01   0.0000000e+00   5.4482685e+01  -8.7242542e+01  -3.6989131e+01
   1.8878595e+01  -2.5696251e+01   0.0000000e+00   2.4644693e+01  -8.3065915e+01  -5.9787695e+01
   1.8909179e+01  -2.5822166e+01   0.0000000e+00   1.4867470e+01  -1.0279077e+02  -4.7039632e+01
   1.8945193e+01  -2.5946919e+01   0.0000000e+00   9.3275443e+00  -1.0542100e+02  -7.6860519e+01
   1.8986599e+01  -2.6070322e+01   0.0000000e+00  -2.7663915e+01  -6.2366195e+01  -1.0187096e+02
   1.9033352e+01  -2.6192188e+01   0.0000000e+00  -6.4598852e+01  -2.8358122e+01  -8.1745688e+01
   1.9085398e+01  -2.6312332e+01   0.0000000e+00  -1.0028693e+02  -2.6196274e+01  -4.8958726e+01
   1.9142673e+01  -2.6430569e+01   0.0000000e+00  -1.3279409e+02  -1.8886427e+01   2.9808281e+01
   1.9205107e+01  -2.6546718e+01   0.0000000e+00  -6.7538839e+01  -2.0788118e+01   1.1074924e+02
   1.9272619e+01  -2.6660601e+01   0.0000000e+00   2.0518920e+01  -1.8675035e+01   8.7247195e+01
   1.9345121e+01  -2.6772041e+01   0.0000000e+00   4.3708383e+01  -1.0956023e+01   3.1075126e+01
   1.9422517e+01  -2.6880867e+01   0.0000000e+00   1.4780935e+01  -2.0550043e+01   5.8289293e+00
   1.9504699e+01  -2.6986910e+01   0.0000000e+00  -6.6529608e+00  -6.1580077e+01   1.0733526e+01
   1.9591555e+01  -2.7090003e+01   0.0000000e+00   2.2110284e+00  -7.3296391e+01  -1.0284100e+01
   1.9682962e+01  -2.7189986e+01   0.0000000e+00   3.9422554e+00  -5.3354487e+01  -1.7040895e+01
   1.9778789e+01  -2.7286702e+01   0.0000000e+00   1.1597112e+01  -5.9562060e+01  -2.1027138e+01
   1.9878898e+01  -2.7379999e+01   0.0000000e+00   1.3758290e+00  -6.1107822e+01  -6.0665305e+01
   1.9983142e+01  -2.7469729e+01   0.0000000e+00  -4.2988297e+01  -3.8435783e+01  -7.3442705e+01
   2.0091368e+01  -2.7555751e+01   0.0000000e+00  -3.4094224e+01  -3.2127345e+00  -2.5815713e+01
   2.0203413e+01  -2.7637929e+01   0.0000000e+00  -7.6455967e+00   1.1043531e+01   7.7005323e+00
   2.0319108e+01  -2.7716131e+01   0.0000000e+00  -1.9102377e+01  -1.3086522e+01   2.6130079e+01
   2.0438279e+01  -2.7790233e+01   0.0000000e+00  -2.8966899e+01  -5.8495404e+01   1.1754084e+01
   2.0560741e+01  -2.7860116e+01   0.0000000e+00  -6.8675923e+01  -1.0097527e+02  -3.4498329e+01
   2.1165322e+01  -2.8262981e+01   0.0000000e+00   6.3904614e+01  -1.8406538e+02  -1.6075477e+02
   2.1302850e+01  -2.8305387e+01   0.0000000e+00   9.5244604e+01   2.0025608e+01  -2.6600467e+02
   2.1442164e+01  -2.8343157e+01   0.0000000e+00   6.6830582e+01   1.0842388e+02  -1.5563639e+02
   2.1583055e+01  -2.8376234e+01   0.0000000e+00   2.1484372e+01   7.6372916e+01  -1.1805195e+02
   2.1725317e+01  -2.8404569e+01   0.0000000e+00   5.6478004e+00   8.6931869e+01  -6.6670285e+01
   2.1868736e+01  -2.8428119e+01   0.0000000e+00  -1.2153077e+01   5.2680447e+01  -2.4566887e+01
   2.2013100e+01  -2.8446848e+01   0.0000000e+00   1.0548412e+01   3.0736250e+01   9.9750787e+00
   2.2158193e+01  -2.8460729e+01   0.0000000e+00   3.8732654e+01  -1.6852340e+01   1.6987948e+01
   2.2303797e+01  -2.8469741e+01   0.0000000e+00   6.7773889e+01  -7.9111460e+01   5.0606217e+01
   2.2449696e+01  -2.8473871e+01   0.0000000e+00   1.9931242e+02  -3.1796053e+02  -1.8679435e+02
   2.2595669e+01  -2.8473111e+01   0.0000000e+00   1.2561677e+02   1.7022804e+01  -7.3659647e+02
   2.2741500e+01  -2.8467463e+01   0.0000000e+00  -1.6566564e+02   5.0106255e+02  -2.8124712e+02
   2.2886969e+01  -2.8456936e+01   0.0000000e+00  -1.5370890e+02  -5.1176985e+01   1.0608846e+02
   2.3031858e+01  -2.8441545e+01   0.0000000e+00  -7.6822404e+01  -1.2350962e+02  -4.6983629e+02
   2.3175951e+01  -2.8421314e+01   0.0000000e+00  -1.0577160e+02   4.9752804e+02  -3.6978335e+02
   2.3319033e+01  -2.8396273e+01   0.0000000e+00  -1.4723933e+01   4.6942367e+02   3.2324578e+02
   2.3460892e+01  -2.8366459e+01   0.0000000e+00   3.9852614e+01  -5.4788812e+00   4.4301278e+02
   2.3601315e+01  -2.8331918e+01   0.0000000e+00   1.7655558e+01  -1.0479180e+02   1.3959110e+02
   2.3740095e+01  -2.8292700e+01   0.0000000e+00  -1.6683229e+00   3.6821132e+01   1.2320528e+02
   2.3877028e+01  -2.8248866e+01   0.0000000e+00   3.7907013e+00   2.6728580e+00   1.9751095e+02
   2.4011913e+01  -2.8200479e+01   0.0000000e+00   1.7510939e+01  -4.1488076e+01   1.5929648e+02
   2.4144550e+01  -2.8147613e+01   0.0000000e+00  -3.9774914e+00  -3.2633844e+01   1.3925384e+02
   2.4274749e+01  -2.8090347e+01   0.0000000e+00  -2.1518426e+01  -2.3698115e+01   1.1430681e+02
   2.4402319e+01  -2.8028764e+01   0.0000000e+00   1.7238065e+01  -1.2075090e+01   8.8800775e+01
   2.4527078e+01  -2.7962957e+01   0.0000000e+00   6.0464392e+01  -2.7159429e+01   8.8955241e+01
   2.4648847e+01  -2.7893024e+01   0.0000000e+00   9.4116390e+01  -3.9789368e+01   5.9289827e+01
   2.4767452e+01  -2.7819066e+01   0.0000000e+00   1.0310055e+02   4.6296554e+00   1.0362667e+02
   2.4882727e+01  -2.7741195e+01   0.0000000e+00   2.3687800e+00   7.1152252e+00   1.5482300e+02
   2.4994510e+01  -2.7659523e+01   0.0000000e+00  -6.4942791e+01   1.9741089e+01   8.8758147e+01
   2.5102647e+01  -2.7574171e+01   0.0000000e+00  -3.7183998e+01   3.3514140e+01   6.2175994e+01
   2.5206988e+01  -2.7485263e+01   0.0000000e+00  -6.1665774e+00  -6.0812328e+00   7.3934749e+01
   2.5307391e+01  -2.7392930e+01   0.0000000e+00   2.2034599e+01  -3.5784750e+01   7.5541628e+01
   2.5403722e+01  -2.7297305e+01   0.0000000e+00   4.4129278e+01  -2.4217101e+01   1.1366023e+02
   2.5495852e+01  -2.7198528e+01   0.0000000e+00   3.2104648e+01  -4.6200257e+01   1.6563692e+02
   2.5583660e+01  -2.7096740e+01   0.0000000e+00   2.1464305e+01  -1.0181097e+02   1.5555415e+02
   2.5667033e+01  -2.6992090e+01   0.0000000e+00   9.7342906e+00  -1.2035553e+02   1.0874228e+02
   2.5745863e+01  -2.6884727e+01   0.0000000e+00   2.4785776e+01  -1.1577202e+02   7.3931805e+01
   2.5820052e+01  -2.6774804e+01   0.0000000e+00   1.2754058e+01  -1.1430221e+02   7.4671406e+01
   2.5889508e+01  -2.6662480e+01   0.0000000e+00  -3.5262196e+01  -7.2863260e+01   2.0058870e+01
   2.5954147e+01  -2.6547913e+01   0.0000000e+00  -4.6757090e+01   3.0276728e-01  -7.1675537e+00
   2.6013892e+01  -2.6431267e+01   0.0000000e+00  -6.8002806e+01   1.6988630e+01  -8.5633653e+00
   2.6068675e+01  -2.6312706e+01   0.0000000e+00  -6.8030966e+01   5.2352229e+00  -2.5999622e+01
   2.6118434e+01  -2.6192397e+01   0.0000000e+00  -7.0741987e+01  -1.2050293e+01  -4.7303188e+01
   2.6163116e+01  -2.6070510e+01   0.0000000e+00  -6.6714369e+01  -1.5403308e+01  -8.5476389e+01
   2.6202673e+01  -2.5947215e+01   0.0000000e+00  -4.8636373e+01  -3.5152621e+01  -1.1818198e+02
   2.6237069e+01  -2.5822683e+01   0.0000000e+00   1.2605517e+01  -6.1780208e+01  -1.2311742e+02
   2.6266271e+01  -2.5697088e+01   0.0000000e+00   4.3071750e+01  -6.1525997e+01  -7.4915606e+01
   2.6290256e+01  -2.5570605e+01   0.0000000e+00   4.4403723e+01  -5.9406169e+01  -4.8784843e+01
   2.6309007e+01  -2.5443407e+01   0.0000000e+00   3.2950669e+01  -5.4658019e+01  -1.0785524e+01
   2.6322517e+01  -2.5315670e+01   0.0000000e+00  -2.8934118e-01  -4.5173075e+01  -9.4163466e+00
   2.6330782e+01  -2.5187569e+01   0.0000000e+00   3.5799832e+00  -4.7304921e+01  -9.5591554e+00
   2.6333808e+01  -2.5059280e+01   0.0000000e+00  -1.1622861e+01  -2.1111774e+01  -2.4916538e+01
   2.6331608e+01  -2.4930976e+01   0.0000000e+00   4.6339442e+01   1.7605486e+01  -4.8186681e+01
   2.6324201e+01  -2.4802834e+01   0.0000000e+00   8.5479101e+01   4.9141214e+00   2.4025017e+01
   2.6311613e+01  -2.4675025e+01   0.0000000e+00   7.3434226e+01  -1.5093037e+01   4.4166303e+01
   2.6293876e+01  -2.4547724e+01   0.0000000e+00   1.2085374e+02  -1.5280306e+01   1.0856861e+02
   2.6271031e+01  -2.4421101e+01   0.0000000e+00   5.2700615e+01   2.0215155e+01   2.2273443e+02
   2.6243123e+01  -2.4295326e+01   0.0000000e+00  -4.3407415e+01   3.8355082e+01   2.1992338e+02
   2.6210204e+01  -2.4170568e+01   0.0000000e+00  -1.0955317e+02   4.1975916e+01   2.0443189e+02
   2.6172332e+01  -2.4046993e+01   0.0000000e+00  -1.2764286e+02   5.8297327e+01   1.0382980e+02
   2.6129572e+01  -2.3924766e+01   0.0000000e+00  -7.9705804e+01   1.7985017e+01   9.1578006e+01
   2.6081993e+01  -2.3804049e+01   0.0000000e+00  -2.0623667e+02   8.6547242e+00   7.3361439e+01
   2.6029673e+01  -2.3685003e+01   0.0000000e+00  -2.1006553e+02   5.8176675e+00  -1.3342559e+02
   2.5972691e+01  -2.3567783e+01   0.0000000e+00  -7.8668253e+01  -2.1985464e+01  -1.8805394e+02
   2.5911136e+01  -2.3452546e+01   0.0000000e+00  -1.4008597e+01  -3.6214705e+01  -1.9615625e+02
   2.5845100e+01  -2.3339442e+01   0.0000000e+00   8.3091441e+01  -4.0275351e+01  -1.4734578e+02
   2.5774679e+01  -2.3228620e+01   0.0000000e+00   6.6094935e+01   8.5721861e+00  -3.9133740e+01
   2.5699977e+01  -2.3120225e+01   0.0000000e+00   1.3685347e+01   2.3218006e+01  -4.8600250e+01
   2.5621100e+01  -2.3014399e+01   0.0000000e+00   3.2496770e+01  -6.0803219e+00  -5.7901403e+01
   2.5538160e+01  -2.2911279e+01   0.0000000e+00   4.0462337e+01  -3.1149295e+00  -2.8290578e+01
   2.5451275e+01  -2.2810999e+01   0.0000000e+00   4.5609754e+01   2.9817987e+01  -1.6814699e+01
   2.5360563e+01  -2.2713691e+01   0.0000000e+00   4.6489009e+01   4.0311348e+01  -8.1380791e+00
   2.5266151e+01  -2.2619479e+01   0.0000000e+00   1.6481576e+01   3.9863352e+01  -1.6154031e+01
   2.5168167e+01  -2.2528487e+01   0.0000000e+00   1.2866032e+01   1.3886258e+01  -5.4241184e+01
   2.5066744e+01  -2.2440831e+01   0.0000000e+00   5.5245403e+00  -9.2576695e+00  -2.9432210e+01
   2.4962018e+01  -2.2356625e+01   0.0000000e+00  -6.0233888e+01   1.8459750e+01  -5.6685434e+01
   2.4854130e+01  -2.2275976e+01   0.0000000e+00  -4.4371838e+01   1.3376475e+01  -1.5769968e+02
   2.4743223e+01  -2.2198990e+01   0.0000000e+00   4.9692692e+01  -2.5738372e+01  -1.7252386e+02
   2.4629442e+01  -2.2125764e+01   0.0000000e+00   1.0679048e+02  -5.8523442e+01  -6.8068871e+01
   2.4512939e+01  -2.2056393e+01   0.0000000e+00   8.5277845e+01   1.5392898e+01   4.7034782e+00
   2.4393864e+01  -2.1990966e+01   0.0000000e+00   1.2320345e+02   2.1026414e+01  -8.9814223e+01
   2.4272374e+01  -2.1929566e+01   0.0000000e+00   2.3365224e+02  -7.6731540e+01   2.3647044e+01
   2.4148626e+01  -2.1872271e+01   0.0000000e+00   1.6687960e+02   2.6963050e+00   2.1829299e+02
   2.4022779e+01  -2.1819156e+01   0.0000000e+00   4.5604634e+01   7.4093318e+01   1.8040883e+02
   2.3894996e+01  -2.1770288e+01   0.0000000e+00   1.2268916e+00   1.0709482e+02   9.0252073e+01
   2.3765441e+01  -2.1725729e+01   0.0000000e+00   3.2904160e+01   1.1114620e+02  -2.8100386e+01
   2.3634279e+01  -2.1685536e+01   0.0000000e+00   5.3965644e+01   3.5023322e+01  -5.3513525e+01
   2.3501680e+01  -2.1649760e+01   0.0000000e+00   3.7243552e+00   9.9696439e+00  -5.3329451e+01
   2.3367810e+01  -2.1618447e+01   0.0000000e+00   8.1115074e+00  -2.1195617e+01  -8.4273444e+01
   2.3232841e+01  -2.1591636e+01   0.0000000e+00   2.8504798e+01  -5.7695204e+01  -5.1991483e+01
   2.3096944e+01  -2.1569362e+01   0.0000000e+00   1.9025516e+01  -5.7090628e+01  -1.1684236e+00
   2.2960291e+01  -2.1551654e+01   0.0000000e+00   1.0178246e+00  -3.2235001e+01   1.6958965e+01
   2.2823057e+01  -2.1538532e+01   0.0000000e+00  -8.2824623e+00  -2.7549356e+01  -4.6134879e+00
   2.2685413e+01  -2.1530015e+01   0.0000000e+00  -1.0061101e+01  -5.1898600e+01  -1.0466478e+01
   2.2547535e+01  -2.1526113e+01   0.0000000e+00  -7.8752196e+00  -7.2114472e+01   1.8221355e+01
   2.2409597e+01  -2.1526832e+01   0.0000000e+00  -5.6866721e+00  -5.7707142e+01   5.9231660e+01
   2.2271773e+01  -2.1532169e+01   0.0000000e+00  -1.4130252e+01  -2.1983770e+01   6.5438276e+01
   2.2134238e+01  -2.1542118e+01   0.0000000e+00  -2.0060062e+01  -1.2836234e+01   4.8504330e+01
   2.1997165e+01  -2.1556667e+01   0.0000000e+00  -1.0725767e+01  -3.2740971e+01   4.2051769e+01
   2.1860729e+01  -2.1575798e+01   0.0000000e+00  -9.5045532e-01  -5.3512130e+01   7.2683463e+01
   2.1725102e+01  -2.1599485e+01   0.0000000e+00  -8.1318023e-01  -1.5749290e+01   9.5504873e+01
   2.1590456e+01  -2.1627699e+01   0.0000000e+00  -8.5927822e-01   1.0647662e+01   4.2989552e+01
   2.1456963e+01  -2.1660403e+01   0.0000000e+00  -5.1495465e+00  -1.4389291e+01  -3.6117950e+00
   2.1324792e+01  -2.1697557e+01   0.0000000e+00  -2.7302613e+01  -6.0917603e+01  -2.8296405e+01
   2.1194112e+01  -2.1739113e+01   0.0000000e+00  -4.9378312e+01  -1.3338437e+02   3.7294009e+01
   2.1065091e+01  -2.1785018e+01   0.0000000e+00  -4.6723847e+01  -9.2574647e+01   1.5424923e+02
   2.0937892e+01  -2.1835213e+01   0.0000000e+00  -4.1951532e+01  -7.5069117e+00   1.5746772e+02
   2.0812680e+01  -2.1889635e+01   0.0000000e+00  -3.8496422e+01   2.2749471e+01   1.2181658e+02
   2.0689616e+01  -2.1948213e+01   0.0000000e+00  -4.1439719e+01   4.0389764e+01   8.5571958e+01
   2.0568860e+01  -2.2010874e+01   0.0000000e+00  -5.1763637e+01   5.1132180e+01   5.8751912e+01
   2.0450568e+01  -2.2077536e+01   0.0000000e+00  -6.9732708e+01   6.9854595e+01   3.4145464e+01
   2.0334895e+01  -2.2148115e+01   0.0000000e+00  -9.0403003e+01   6.3090982e+01   1.4952516e+01
   2.0221992e+01  -2.2222520e+01   0.0000000e+00  -9.5737744e+01   3.8827509e+01   2.1252443e+01
   2.0112007e+01  -2.2300655e+01   0.0000000e+00  -1.0094531e+02   2.5674719e+01   4.8226333e+01
   2.0005087e+01  -2.2382421e+01   0.0000000e+00  -1.1142697e+02   3.5681125e+01   7.7139224e+01
   1.9901373e+01  -2.2467711e+01   0.0000000e+00  -1.2014775e+02   4.1428156e+01   1.0213879e+02
   1.9801004e+01  -2.2556416e+01   0.0000000e+00  -1.1041117e+02   4.8809956e+01   1.3737748e+02
   1.9704116e+01  -2.2648422e+01   0.0000000e+00  -7.9859689e+01   7.0528646e+01   1.6042946e+02
   1.9610841e+01  -2.2743609e+01   0.0000000e+00  -4.0886625e+01   8.6739005e+01   1.5329252e+02
   1.9521305e+01  -2.2841855e+01   0.0000000e+00  -1.1097483e+01   7.6880207e+01   1.3271828e+02
   1.9435633e+01  -2.2943031e+01   0.0000000e+00   1.4154652e+01   5.9369958e+01   1.1657645e+02
   1.9353944e+01  -2.3047007e+01   0.0000000e+00   2.7951097e+01   4.6609514e+01   9.6727754e+01
   1.9276353e+01  -2.3153647e+01   0.0000000e+00   3.4609131e+01   3.7025695e+01   8.3221044e+01
   1.9202970e+01  -2.3262812e+01   0.0000000e+00   4.0860420e+01   2.7372543e+01   7.2241390e+01
   1.9133901e+01  -2.3374359e+01   0.0000000e+00   5.1291878e+01   1.6595737e+01   6.3094162e+01
   1.9069247e+01  -2.3488141e+01   0.0000000e+00   5.9312224e+01   8.1216562e+00   4.3973373e+01
   1.9009104e+01  -2.3604011e+01   0.0000000e+00   5.8255174e+01   8.5746348e+00   2.2091087e+01
   1.8953562e+01  -2.3721815e+01   0.0000000e+00   4.4011554e+01   1.2241490e+01  -1.0939280e+01
   1.8902707e+01  -2.3841398e+01   0.0000000e+00   6.5248241e+00   8.1779287e-01  -2.3366851e+01
   1.8856619e+01  -2.3962601e+01   0.0000000e+00  -2.2695233e+01  -5.8365453e+00   1.3624838e+00
   1.8815371e+01  -2.4085264e+01   0.0000000e+00  -3.0985488e+01  -2.5356081e+00   3.3529800e+01
   1.8779032e+01  -2.4209225e+01   0.0000000e+00  -2.9516454e+01   2.7456914e+00   5.8031880e+01
   1.8747664e+01  -2.4334317e+01   0.0000000e+00  -2.8128238e+01   3.5255041e+00   9.0421588e+01
   1.8721324e+01  -2.4460373e+01   0.0000000e+00   2.4272005e+00   1.1766040e+00   1.3604959e+02
   1.8700062e+01  -2.4587226e+01   0.0000000e+00   7.1433764e+01  -2.0672411e+01   1.3556955e+02
   1.8683922e+01  -2.4714703e+01   0.0000000e+00   9.7819518e+01  -5.6436010e+01   6.9354360e+01
   1.8672941e+01  -2.4842634e+01   0.0000000e+00   6.6872876e+01  -7.0251782e+01   3.5677499e+01
   1.8667150e+01  -2.4970845e+01   0.0000000e+00   6.0530735e+01  -6.1211033e+01   1.8655591e+01
   1.8666572e+01  -2.5099163e+01   0.0000000e+00   3.4362353e+01  -6.0827568e+01  -1.0175159e+01
   1.8671226e+01  -2.5227412e+01   0.0000000e+00   6.6822946e+00  -6.9817530e+01  -2.3184982e+00
   1.8681121e+01  -2.5355419e+01   0.0000000e+00  -1.7306483e+00  -7.7824455e+01   1.8559273e+01
   1.8696260e+01  -2.5483007e+01   0.0000000e+00   2.7923625e+01  -9.8094085e+01   3.2844108e+01
   1.8716639e+01  -2.5610002e+01   0.0000000e+00   5.1396863e+01  -1.1513307e+02  -1.9834582e+01
   1.8742248e+01  -2.5736228e+01   0.0000000e+00   1.7260920e+01  -1.0118498e+02  -4.2976126e+01
   1.8773067e+01  -2.5861510e+01   0.0000000e+00   1.3377451e+01  -8.5908421e+01  -2.0500952e+01
   1.8809070e+01  -2.5985676e+01   0.0000000e+00   2.2998513e+01  -8.6210988e+01  -4.0500826e+01
   1.8850225e+01  -2.6108553e+01   0.0000000e+00  -8.2580264e+00  -7.3423357e+01  -8.4686397e+01
   1.8896490e+01  -2.6229968e+01   0.0000000e+00  -6.2142036e+01  -4.4863551e+01  -7.5062842e+01
   1.8947817e+01  -2.6349751e+01   0.0000000e+00  -9.3606739e+01  -1.6703932e+01  -2.7548172e+01
   1.9004149e+01  -2.6467735e+01   0.0000000e+00  -1.1007589e+02   5.3582400e+00   5.0124379e+01
   1.9065423e+01  -2.6583752e+01   0.0000000e+00  -4.3827362e+01  -6.6054339e+00   1.1253896e+02
   1.9131567e+01  -2.6697639e+01   0.0000000e+00   2.5508634e+01  -3.2609949e+01   6.0304016e+01
   1.9202504e+01  -2.6809234e+01   0.0000000e+00   2.5893388e+01  -4.2982119e+01  -1.6648263e+01
   1.9278145e+01  -2.6918377e+01   0.0000000e+00  -2.0338094e+01  -2.9991722e+01  -4.7947011e+01
   1.9358398e+01  -2.7024914e+01   0.0000000e+00  -6.2577278e+01  -4.5320972e+01   1.5004276e+01
   1.9443161e+01  -2.7128690e+01   0.0000000e+00  -2.4465948e+01  -1.0875236e+02   3.4587142e+01
   1.9532325e+01  -2.7229558e+01   0.0000000e+00  -7.8938854e+00  -1.0567843e+02  -2.5840132e+01
   1.9625774e+01  -2.7327370e+01   0.0000000e+00  -1.0745280e+01  -8.3485590e+01  -3.2167561e+01
   1.9723385e+01  -2.7421987e+01   0.0000000e+00  -6.5767256e+00  -7.2763727e+01  -5.4596722e+01
   1.9825027e+01  -2.7513269e+01   0.0000000e+00  -5.6315485e+01  -5.1235386e+01  -3.4758556e+01
   1.9930563e+01  -2.7601086e+01   0.0000000e+00  -2.3317147e+01  -6.3496079e+01   1.4111790e+01
   2.0039849e+01  -2.7685307e+01   0.0000000e+00   4.1559144e+01  -1.6245364e+01  -4.2522857e+01
   2.0152735e+01  -2.7765810e+01   0.0000000e+00   1.2083819e+01   4.8612465e+01  -3.3678513e+01
   2.0269062e+01  -2.7842477e+01   0.0000000e+00  -3.7230936e-01   2.7328073e+01   1.2010794e+01
   2.0388669e+01  -2.7915196e+01   0.0000000e+00  -4.5821392e+01   4.5940004e+00   9.1371518e+00
   2.0511386e+01  -2.7983857e+01   0.0000000e+00  -1.3064449e+02  -4.0410444e+01   5.3905813e+01
   2.0637038e+01  -2.8048361e+01   0.0000000e+00  -1.7996308e+02  -1.1842307e+02   8.3447929e+01
   2.0765445e+01  -2.8108612e+01   0.0000000e+00  -1.9016079e+02  -1.5367448e+02   9.0044233e+01
   2.0896422e+01  -2.8164520e+01   0.0000000e+00  -1.0817402e+02  -1.4877803e+02   1.1326000e+02
   2.1029779e+01  -2.8216002e+01   0.0000000e+00   6.6762361e+00  -1.8899710e+02   5.9855158e+01
   2.1696587e+01  -2.8530550e+01   0.0000000e+00  -1.0806457e+00   9.4252655e+01  -8.6996946e+01
   2.1840388e+01  -2.8554221e+01   0.0000000e+00  -1.7385608e+01   6.4588223e+01   1.3673678e+01
   2.1985113e+01  -2.8573223e+01   0.0000000e+00   1.2449600e+01  -6.1167588e+00   1.6030778e+01
   2.2130560e+01  -2.8587531e+01   0.0000000e+00   4.9005698e+01  -2.9060989e+01   2.2049260e+01
   2.2276525e+01  -2.8597124e+01   0.0000000e+00   1.2179764e+02  -1.2693088e+02   5.9476640e+01
   2.2422804e+01  -2.8601989e+01   0.0000000e+00   1.3373336e+02  -2.9891535e+02  -2.8911092e+02
   2.2569191e+01  -2.8602118e+01   0.0000000e+00  -1.9083756e+02   2.3970619e+02  -7.2301107e+02
   2.2715481e+01  -2.8597512e+01   0.0000000e+00  -4.7932307e+02   6.6708687e+02   4.8763261e+01
   2.2861468e+01  -2.8588178e+01   0.0000000e+00  -3.0354565e+02  -1.3402897e+02   3.5772087e+02
   2.3006949e+01  -2.8574127e+01   0.0000000e+00  -1.9055901e+02  -1.5542773e+02  -3.8759562e+02
   2.3151719e+01  -2.8555381e+01   0.0000000e+00  -2.5627773e+02   4.1402318e+02  -2.4951695e+02
   2.3295575e+01  -2.8531965e+01   0.0000000e+00  -5.0929315e+01   3.0251629e+02   1.7807013e+02
   2.3438319e+01  -2.8503913e+01   0.0000000e+00   1.2119522e+02   3.6009597e+01   2.3419013e+02
   2.3579750e+01  -2.8471263e+01   0.0000000e+00   5.1212807e+01  -6.1761358e+01   1.1017932e+02
   2.3719672e+01  -2.8434062e+01   0.0000000e+00   2.1997500e+01   5.4524353e+00   6.2308397e+01
   2.3857891e+01  -2.8392362e+01   0.0000000e+00   4.9440624e+01  -1.9264445e+01   1.0784318e+02
   2.3994218e+01  -2.8346222e+01   0.0000000e+00   5.2177507e+01  -6.0673300e+01   7.5174038e+01
   2.4128466e+01  -2.8295705e+01   0.0000000e+00   6.8614128e+01  -6.6059635e+01   5.2054183e+01
   2.4260450e+01  -2.8240882e+01   0.0000000e+00   9.1103919e+01  -6.5990564e+01   5.6424693e+01
   2.4389991e+01  -2.8181830e+01   0.0000000e+00   7.1305321e+01  -7.4658142e+01   3.4332743e+01
   2.4516915e+01  -2.8118631e+01   0.0000000e+00   7.0258136e+01  -4.9360817e+01  -1.9276336e+01
   2.4641050e+01  -2.8051372e+01   0.0000000e+00   4.5201291e+01  -2.6179393e+01  -3.3903858e+01
   2.4762232e+01  -2.7980147e+01   0.0000000e+00   4.7404476e+01   1.1727330e+00  -7.6910165e+01
   2.4880300e+01  -2.7905054e+01   0.0000000e+00   1.0025562e+02   4.8065234e+01  -2.1499067e+00
   2.4995099e+01  -2.7826197e+01   0.0000000e+00   6.5538462e+01   3.0445687e+01   1.1024272e+02
   2.5106478e+01  -2.7743684e+01   0.0000000e+00  -1.3703832e+01   3.1949804e+01   1.3521466e+02
   2.5214294e+01  -2.7657628e+01   0.0000000e+00  -5.9895606e+01   1.6211914e+01   1.2258063e+02
   2.5318409e+01  -2.7568147e+01   0.0000000e+00  -5.9135884e+01  -3.6836524e+01   7.6896521e+01
   2.5418691e+01  -2.7475363e+01   0.0000000e+00  -3.1766508e+00  -7.8426992e+01   1.8339518e+01
   2.5515015e+01  -2.7379402e+01   0.0000000e+00   7.3140297e+01  -8.0102279e+01   4.7605040e+01
   2.5607260e+01  -2.7280395e+01   0.0000000e+00   5.9012678e+01  -1.2695695e+02   1.0016461e+02
   2.5695315e+01  -2.7178474e+01   0.0000000e+00   5.0157504e+01  -1.5888400e+02   6.2190700e+01
   2.5779072e+01  -2.7073779e+01   0.0000000e+00   4.3853340e+01  -1.4579158e+02   5.1928726e+01
   2.5858433e+01  -2.6966448e+01   0.0000000e+00   3.0668779e+01  -1.4009511e+02   1.6832171e+00
   2.5933304e+01  -2.6856627e+01   0.0000000e+00   4.8576128e+01  -9.5955350e+01  -3.5082314e+01
   2.6003599e+01  -2.6744461e+01   0.0000000e+00   3.1367276e+01  -2.5431598e+01  -2.1565547e+01
   2.6069240e+01  -2.6630099e+01   0.0000000e+00   4.4285958e-01   3.4536672e+01   3.0750208e+01
   2.6130153e+01  -2.6513695e+01   0.0000000e+00  -6.1767625e+01   3.6083974e+01   5.3462499e+01
   2.6186274e+01  -2.6395400e+01   0.0000000e+00  -8.9599062e+01   2.4446938e+01   1.0100647e+01
   2.6237544e+01  -2.6275372e+01   0.0000000e+00  -8.7354763e+01   1.7164671e+01  -3.3377397e+01
   2.6283911e+01  -2.6153767e+01   0.0000000e+00  -7.1479658e+01   3.6858017e+01  -5.1460105e+01
   2.6325330e+01  -2.6030745e+01   0.0000000e+00  -1.0346275e+02   3.6110765e+01  -5.4521917e+01
   2.6361764e+01  -2.5906467e+01   0.0000000e+00  -8.3979691e+01  -1.2623759e+01  -1.4253399e+02
   2.6393181e+01  -2.5781093e+01   0.0000000e+00   1.9903320e+01  -3.3866434e+01  -1.4144688e+02
   2.6419557e+01  -2.5654786e+01   0.0000000e+00   3.8500648e+01  -4.3439109e+01  -8.2239471e+01
   2.6440874e+01  -2.5527710e+01   0.0000000e+00   5.1725931e+01  -4.2154141e+01  -4.8846200e+01
   2.6457122e+01  -2.5400027e+01   0.0000000e+00   2.4033367e+01  -2.8676830e+01  -2.4939754e+00
   2.6468295e+01  -2.5271901e+01   0.0000000e+00  -8.4141902e+00  -3.2012386e+01  -2.4652572e+01
   2.6474395e+01  -2.5143497e+01   0.0000000e+00   1.5733449e+01  -3.0010664e+01  -3.3532402e+01
   2.6475432e+01  -2.5014978e+01   0.0000000e+00   3.1328633e+01  -1.0473599e+01  -1.7016609e+01
   2.6471419e+01  -2.4886507e+01   0.0000000e+00   6.0860863e+01  -7.5164173e+00   5.3390606e+00
   2.6462377e+01  -2.4758246e+01   0.0000000e+00   6.1413775e+01  -1.2840013e+01   3.2547305e+01
   2.6448333e+01  -2.4630359e+01   0.0000000e+00   8.1984804e+01  -1.5660876e+01   3.5844933e+01
   2.6429320e+01  -2.4503005e+01   0.0000000e+00   1.2156513e+02  -3.5592751e+01   1.4066977e+02
   2.6405378e+01  -2.4376344e+01   0.0000000e+00   2.4041790e+01  -3.3943288e+01   2.6496077e+02
   2.6376549e+01  -2.4250535e+01   0.0000000e+00  -1.0128622e+02  -2.8408738e+01   2.3363325e+02
   2.6342885e+01  -2.4125735e+01   0.0000000e+00  -1.5269949e+02  -5.3508058e+01   1.4730604e+02
   2.6304441e+01  -2.4002099e+01   0.0000000e+00  -1.3349431e+02  -4.4867175e+01   7.8743727e+01
   2.6261278e+01  -2.3879780e+01   0.0000000e+00  -1.2749380e+02  -3.1772733e+01   7.8279048e+01
   2.6213463e+01  -2.3758931e+01   0.0000000e+00  -2.0901070e+02   5.5634297e+00  -9.1810227e-01
   2.6161066e+01  -2.3639699e+01   0.0000000e+00  -1.5200527e+02   4.4568825e+01  -1.6907927e+02
   2.6104165e+01  -2.3522232e+01   0.0000000e+00  -3.2009895e+01   3.4192553e+01  -1.9878647e+02
   2.6042840e+01  -2.3406674e+01   0.0000000e+00   5.3691304e+01   3.4305088e+01  -2.0251029e+02
   2.5977179e+01  -2.3293167e+01   0.0000000e+00   1.5971633e+02   2.2809928e+01  -9.5891617e+01
   2.5907270e+01  -2.3181849e+01   0.0000000e+00   7.5527616e+01   4.1591785e+01   5.7625688e+01
   2.5833210e+01  -2.3072856e+01   0.0000000e+00  -3.4215151e+01   2.7861750e+01  -1.6906202e+01
   2.5755099e+01  -2.2966321e+01   0.0000000e+00   1.9235871e+01  -1.7642678e+01  -7.2218197e+01
   2.5673039e+01  -2.2862374e+01   0.0000000e+00   4.6836152e+01  -1.4802797e+01  -3.4176695e+01
   2.5587139e+01  -2.2761140e+01   0.0000000e+00   3.7646583e+01  -1.4062597e+01  -4.0047133e-02
   2.5497509e+01  -2.2662741e+01   0.0000000e+00   2.1671819e+01   8.3921199e+00   2.0606673e+01
   2.5404267e+01  -2.2567298e+01   0.0000000e+00  -1.6819711e+00   2.7745036e+01  -5.1446213e+00
   2.5307530e+01  -2.2474924e+01   0.0000000e+00   8.0694518e+00   3.1186402e+01  -4.6104393e+01
   2.5207421e+01  -2.2385731e+01   0.0000000e+00   3.2136133e+01   1.9939381e+01  -4.6436499e+01
   2.5104067e+01  -2.2299826e+01   0.0000000e+00   8.3258841e+00   5.1579992e+01  -4.9242399e+01
   2.4997595e+01  -2.2217313e+01   0.0000000e+00   3.2888200e+01   6.6381981e+01  -1.3381231e+02
   2.4888140e+01  -2.2138290e+01   0.0000000e+00   1.1157561e+02   3.1626116e+01  -1.2687530e+02
   2.4775834e+01  -2.2062851e+01   0.0000000e+00   1.1903362e+02  -6.1929583e+00  -7.2623456e+01
   2.4660818e+01  -2.1991088e+01   0.0000000e+00   9.0353478e+01  -4.5458910e+01   7.9012103e+00
   2.4543230e+01  -2.1923085e+01   0.0000000e+00   6.7669875e+01  -9.2041995e+00   2.4601235e+01
   2.4423215e+01  -2.1858924e+01   0.0000000e+00   1.4657165e+02  -7.1857301e+01   4.0421237e+01
   2.4300916e+01  -2.1798682e+01   0.0000000e+00   9.5781717e+01  -7.0567003e+01   2.3396755e+02
   2.4176483e+01  -2.1742429e+01   0.0000000e+00  -7.8976117e+01   2.8836983e+01   2.0150479e+02
   2.4050064e+01  -2.1690233e+01   0.0000000e+00  -6.8474576e+01   2.8473158e+01   8.4754924e+01
   2.3921812e+01  -2.1642156e+01   0.0000000e+00  -1.9494325e+01   6.7028479e+01   5.1242183e+01
   2.3791878e+01  -2.1598255e+01   0.0000000e+00  -1.8556959e+00   7.1315188e+01   8.6853818e-01
   2.3660419e+01  -2.1558582e+01   0.0000000e+00  -1.1226615e+01   5.2530659e+01  -3.1624676e+01
   2.3527589e+01  -2.1523184e+01   0.0000000e+00  -9.1628357e+00   1.2589598e+01  -8.7567746e+01
   2.3393548e+01  -2.1492103e+01   0.0000000e+00   3.1754835e+01  -4.1002624e+01  -7.3778935e+01
   2.3258453e+01  -2.1465376e+01   0.0000000e+00   4.0262156e+01  -4.7409196e+01  -3.2762757e+01
   2.3122465e+01  -2.1443035e+01   0.0000000e+00   1.9957143e+01  -3.4475415e+01  -1.0834329e+01
   2.2985743e+01  -2.1425105e+01   0.0000000e+00  -8.2115601e+00  -1.9396893e+01  -1.3922057e+01
   2.2848449e+01  -2.1411609e+01   0.0000000e+00  -1.4835040e+01  -2.7245825e+01  -1.9456621e+01
   2.2710745e+01  -2.1402561e+01   0.0000000e+00  -1.8548707e+01  -4.4782189e+01  -1.5823178e+01
   2.2572793e+01  -2.1397974e+01   0.0000000e+00  -1.8862979e+01  -7.4228694e+01   1.0972915e+01
   2.2434756e+01  -2.1397852e+01   0.0000000e+00  -1.7861818e+01  -6.1659371e+01   6.9901010e+01
   2.2296795e+01  -2.1402195e+01   0.0000000e+00  -3.0035483e+01  -1.4257981e+01   8.6049839e+01
   2.2159073e+01  -2.1410999e+01   0.0000000e+00  -4.7442556e+01  -3.7944720e-01   6.0384978e+01
   2.2021753e+01  -2.1424252e+01   0.0000000e+00  -5.8704729e+01  -2.6250470e+01   4.9577159e+01
   2.1884995e+01  -2.1441940e+01   0.0000000e+00  -5.8100344e+01  -4.7537482e+01   7.7714697e+01
   2.1748963e+01  -2.1464041e+01   0.0000000e+00  -5.2744162e+01  -1.8719633e+01   9.9416320e+01
   2.1613815e+01  -2.1490528e+01   0.0000000e+00  -3.6270223e+01   7.7128414e+00   5.9461756e+01
   2.1479712e+01  -2.1521372e+01   0.0000000e+00  -1.6315724e+01  -1.2782354e+01   2.4783602e+01
   2.1346812e+01  -2.1556535e+01   0.0000000e+00  -6.1718228e+00  -3.3390434e+01  -5.0869710e+00
   2.1215274e+01  -2.1595975e+01   0.0000000e+00  -2.8648389e+01  -1.0042797e+02  -1.9671808e+00
   2.1085253e+01  -2.1639647e+01   0.0000000e+00  -5.8032505e+01  -9.6466121e+01   1.0424364e+02
   2.0956904e+01  -2.1687497e+01   0.0000000e+00  -6.7086597e+01  -4.8938605e+00   1.2556161e+02
   2.0830381e+01  -2.1739469e+01   0.0000000e+00  -6.7095174e+01   2.3245718e+01   9.9891089e+01
   2.0705835e+01  -2.1795501e+01   0.0000000e+00  -6.2489754e+01   4.6886863e+01   8.7558201e+01
   2.0583416e+01  -2.1855528e+01   0.0000000e+00  -5.6346028e+01   4.6025457e+01   6.5356315e+01
   2.0463272e+01  -2.1919476e+01   0.0000000e+00  -3.3615973e+01   6.0706615e+01   4.5974065e+01
   2.0345548e+01  -2.1987271e+01   0.0000000e+00  -3.8515033e+01   6.9433647e+01  -2.0058250e+01
   2.0230387e+01  -2.2058831e+01   0.0000000e+00  -6.5668702e+01   3.3362427e+01  -3.9958204e+01
   2.0117930e+01  -2.2134070e+01   0.0000000e+00  -7.7214340e+01   1.8373672e+01  -9.3572929e+00
   2.0008315e+01  -2.2212900e+01   0.0000000e+00  -8.5206633e+01   3.7429271e+01   1.4760943e+01
   1.9901677e+01  -2.2295225e+01   0.0000000e+00  -1.0585228e+02   5.6938327e+01   1.4177962e+01
   1.9798149e+01  -2.2380947e+01   0.0000000e+00  -1.2841822e+02   5.1085768e+01   3.6287759e+01
   1.9697859e+01  -2.2469962e+01   0.0000000e+00  -1.2343796e+02   5.6750450e+01   7.9538800e+01
   1.9600935e+01  -2.2562165e+01   0.0000000e+00  -9.3882652e+01   7.1319493e+01   1.0375748e+02
   1.9507498e+01  -2.2657444e+01   0.0000000e+00  -6.0287968e+01   8.2634016e+01   9.7948232e+01
   1.9417668e+01  -2.2755684e+01   0.0000000e+00  -4.4146164e+01   7.3597155e+01   9.1290127e+01
   1.9331561e+01  -2.2856766e+01   0.0000000e+00  -2.1564572e+01   6.2779887e+01   9.8543015e+01
   1.9249288e+01  -2.2960568e+01   0.0000000e+00   2.2606398e+00   5.0941135e+01   9.1772730e+01
   1.9170958e+01  -2.3066965e+01   0.0000000e+00   1.8403480e+01   4.2229897e+01   8.2401137e+01
   1.9096674e+01  -2.3175827e+01   0.0000000e+00   2.3231973e+01   3.6232540e+01   7.0976918e+01
   1.9026536e+01  -2.3287021e+01   0.0000000e+00   2.8431724e+01   2.7828341e+01   6.8917255e+01
   1.8960640e+01  -2.3400412e+01   0.0000000e+00   3.9913417e+01   2.0879586e+01   6.1860700e+01
   1.8899076e+01  -2.3515861e+01   0.0000000e+00   5.3736678e+01   1.6732474e+01   4.5811279e+01
   1.8841930e+01  -2.3633227e+01   0.0000000e+00   5.3845575e+01   1.3747529e+01   6.2373913e+00
   1.8789285e+01  -2.3752366e+01   0.0000000e+00   2.3997680e+01  -4.3738452e+00  -1.7372899e+01
   1.8741217e+01  -2.3873132e+01   0.0000000e+00  -4.3364381e+00  -1.1712414e+01  -8.6516997e+00
   1.8697798e+01  -2.3995374e+01   0.0000000e+00  -2.1092041e+01  -9.2141375e+00   1.4590997e+01
   1.8659095e+01  -2.4118942e+01   0.0000000e+00  -2.2257242e+01   2.8993122e-01   3.6631644e+01
   1.8625168e+01  -2.4243682e+01   0.0000000e+00  -2.6509550e+01   8.5641552e+00   5.7697337e+01
   1.8596073e+01  -2.4369440e+01   0.0000000e+00  -1.8195109e+01   2.1743334e+01   8.8431796e+01
   1.8571862e+01  -2.4496058e+01   0.0000000e+00   5.6187676e+00   3.2613885e+01   1.1315866e+02
   1.8552579e+01  -2.4623378e+01   0.0000000e+00   4.8909854e+01   1.7556979e+01   1.1318326e+02
   1.8538262e+01  -2.4751241e+01   0.0000000e+00   6.3964605e+01  -8.1118318e+00   7.4823589e+01
   1.8528946e+01  -2.4879485e+01   0.0000000e+00   5.9314115e+01  -2.5552844e+01   4.7903871e+01
   1.8524657e+01  -2.5007949e+01   0.0000000e+00   4.9874282e+01  -4.0741431e+01   7.4380193e+00
   1.8525417e+01  -2.5136470e+01   0.0000000e+00   1.0937660e+01  -5.8929722e+01  -2.0602962e+00
   1.8531240e+01  -2.5264884e+01   0.0000000e+00  -3.4276091e+00  -6.9044619e+01   1.4706976e+01
   1.8542136e+01  -2.5393029e+01   0.0000000e+00  -1.2627528e+01  -7.6525068e+01   3.5363798e+01
   1.8558106e+01  -2.5520741e+01   0.0000000e+00   1.0533275e+01  -9.7400801e+01   6.2646223e+01
   1.8579146e+01  -2.5647854e+01   0.0000000e+00   3.8212692e+01  -1.2769742e+02   4.0794638e+01
   1.8605246e+01  -2.5774207e+01   0.0000000e+00   3.8211642e+01  -1.1800156e+02   3.3830347e+00
   1.8636388e+01  -2.5899636e+01   0.0000000e+00   2.6575479e+01  -8.9693506e+01  -2.0026092e+01
   1.8672548e+01  -2.6023979e+01   0.0000000e+00   1.5738937e+01  -8.8400508e+01  -3.5025361e+01
   1.8713696e+01  -2.6147074e+01   0.0000000e+00  -1.1011922e+01  -8.6293113e+01  -5.1357845e+01
   1.8759793e+01  -2.6268760e+01   0.0000000e+00  -3.5836725e+01  -5.4549170e+01  -3.9262066e+01
   1.8810796e+01  -2.6388879e+01   0.0000000e+00  -5.5247481e+01  -1.7655139e+00  -2.7471569e+01
   1.8866653e+01  -2.6507272e+01   0.0000000e+00  -8.4535349e+01   3.0185688e+01   2.9410287e+01
   1.8927306e+01  -2.6623784e+01   0.0000000e+00  -3.6425893e+01   1.8984128e+01   8.9147341e+01
   1.8992690e+01  -2.6738261e+01   0.0000000e+00  -1.3402103e+00  -1.7323110e+01   6.4876327e+01
   1.9062733e+01  -2.6850551e+01   0.0000000e+00  -1.7734260e+01  -6.4140194e+01   3.1075797e+01
   1.9137356e+01  -2.6960505e+01   0.0000000e+00  -4.8646868e+01  -8.1884210e+01  -1.1292671e+01
   1.9216473e+01  -2.7067975e+01   0.0000000e+00  -9.7376256e+01  -5.1821514e+01   2.5567568e+01
   1.9299993e+01  -2.7172819e+01   0.0000000e+00  -6.0463777e+01  -8.5998284e+01   1.1200408e+02
   1.9387815e+01  -2.7274895e+01   0.0000000e+00  -1.1421666e+01  -1.3417595e+02   6.2018675e+01
   1.9479834e+01  -2.7374065e+01   0.0000000e+00  -2.6758882e+01  -1.2093617e+02   2.0177440e+01
   1.9575937e+01  -2.7470196e+01   0.0000000e+00  -1.0451509e+01  -1.1718280e+02  -1.3254275e+01
   1.9676006e+01  -2.7563157e+01   0.0000000e+00  -4.5502100e+01  -5.9984926e+01  -3.0478652e+01
   1.9779915e+01  -2.7652821e+01   0.0000000e+00  -6.0898547e+00  -5.9560545e+01   5.7912530e+01
   1.9887532e+01  -2.7739068e+01   0.0000000e+00   9.5367506e+01  -8.3151077e+01  -5.3073302e+01
   1.9998720e+01  -2.7821778e+01   0.0000000e+00   2.5798866e+01   9.5077929e+00  -1.5924126e+02
   2.0113335e+01  -2.7900838e+01   0.0000000e+00  -1.1118714e+01   4.8451651e+01  -9.1881374e+01
   2.0231228e+01  -2.7976139e+01   0.0000000e+00  -2.7119344e+01   5.3183787e+01  -7.4442542e+01
   2.0352244e+01  -2.8047578e+01   0.0000000e+00  -1.0658764e+02   7.4720496e+01   1.0457203e+01
   2.0476222e+01  -2.8115056e+01   0.0000000e+00  -1.2500146e+02   2.4519221e+01   1.5555227e+02
   2.0602998e+01  -2.8178480e+01   0.0000000e+00  -9.4156050e+01  -5.7312772e+01   2.3472597e+02
   2.0732401e+01  -2.8237761e+01   0.0000000e+00   6.4920229e-01  -1.5338748e+02   2.3586532e+02
   2.0864256e+01  -2.8292817e+01   0.0000000e+00   1.5182840e+02  -1.7572569e+02   8.0750749e+01
   2.0998384e+01  -2.8343571e+01   0.0000000e+00   1.5407602e+02  -1.1697699e+02  -2.4483555e+01
   2.1134602e+01  -2.8389953e+01   0.0000000e+00   8.5998804e+01  -1.9190512e+02  -1.4902688e+02
   2.1272723e+01  -2.8431898e+01   0.0000000e+00   6.3212768e+01  -3.2975363e+01  -3.8244118e+02
   2.1412557e+01  -2.8469346e+01   0.0000000e+00  -2.5020341e+01   1.5906363e+02  -2.4165402e+02
   2.1553910e+01  -2.8502246e+01   0.0000000e+00  -3.2758894e+01   6.4717349e+01  -1.0788417e+02
   2.2269128e+01  -2.8725255e+01   0.0000000e+00   2.6305216e+02  -2.0963137e+02  -1.1255861e+02
   2.2415792e+01  -2.8730185e+01   0.0000000e+00   1.3053956e+02  -4.3210301e+01  -4.2463010e+02
   2.2562566e+01  -2.8730523e+01   0.0000000e+00  -2.5355017e+02   5.9727641e+02  -2.8575982e+02
   2.2709259e+01  -2.8726270e+01   0.0000000e+00  -3.0187770e+02   6.2385918e+02   7.0484726e+02
   2.2855675e+01  -2.8717431e+01   0.0000000e+00  -1.7602776e+02  -2.9654620e+02   6.0933317e+02
   2.3001624e+01  -2.8704018e+01   0.0000000e+00  -2.6854694e+02  -7.2998264e+01  -2.2890167e+02
   2.3146912e+01  -2.8686049e+01   0.0000000e+00  -3.2187946e+02   3.6061677e+02   8.8968180e+01
   2.3291350e+01  -2.8663546e+01   0.0000000e+00  -1.3724845e+02   4.4848952e+01   2.2389265e+02
   2.3434748e+01  -2.8636541e+01   0.0000000e+00   2.0373065e+01   1.5715342e+01   4.1695460e+01
   2.3576918e+01  -2.8605068e+01   0.0000000e+00   1.6217711e+01   1.9783543e+01   7.3098616e+01
   2.3717676e+01  -2.8569169e+01   0.0000000e+00   6.5031829e-02   1.5267975e+00   6.2620341e+01
   2.3856838e+01  -2.8528892e+01   0.0000000e+00   1.8329368e+00  -1.9994728e+01   5.4096129e+01
   2.3994225e+01  -2.8484289e+01   0.0000000e+00   6.6141023e+00  -3.5308040e+01   2.3283096e+01
   2.4129659e+01  -2.8435419e+01   0.0000000e+00  -3.5528803e+00  -6.9062429e+01   2.5359007e+00
   2.4262966e+01  -2.8382346e+01   0.0000000e+00   3.6025241e+01  -8.0815047e+01  -9.2547669e+01
   2.4393977e+01  -2.8325140e+01   0.0000000e+00   5.8128736e+01  -2.4353054e+01  -9.8391130e+01
   2.4522525e+01  -2.8263874e+01   0.0000000e+00   1.5363512e+01  -1.7301038e+00  -1.0600769e+02
   2.4648447e+01  -2.8198630e+01   0.0000000e+00   5.0019068e+00   5.8779373e+01  -8.1874721e+01
   2.4771586e+01  -2.8129492e+01   0.0000000e+00  -3.6889261e+01   5.9322584e+01  -2.3064783e+01
   2.4891788e+01  -2.8056549e+01   0.0000000e+00  -3.2552781e+01   5.8670499e+01  -3.5485714e+01
   2.5008905e+01  -2.7979897e+01   0.0000000e+00   3.3677060e+01   5.2817129e+01  -8.7860732e+00
   2.5122793e+01  -2.7899633e+01   0.0000000e+00   6.6952160e+01   5.5069890e+01   5.9861088e+01
   2.5233313e+01  -2.7815863e+01   0.0000000e+00   1.8681537e+01   4.0609378e+01   1.5860467e+02
   2.5340333e+01  -2.7728693e+01   0.0000000e+00  -5.3637806e+01  -1.6153307e+01   1.6022395e+02
   2.5443724e+01  -2.7638234e+01   0.0000000e+00  -1.0288755e+02  -6.3220073e+01   7.8310839e+01
   2.5543365e+01  -2.7544604e+01   0.0000000e+00  -7.1485450e+01  -9.4023477e+01  -5.5933731e+01
   2.5639139e+01  -2.7447920e+01   0.0000000e+00   2.9279053e+01  -9.3763141e+01  -6.7669556e+01
   2.5730936e+01  -2.7348306e+01   0.0000000e+00   2.9417837e+01  -1.5556650e+02  -4.0459227e+01
   2.5818651e+01  -2.7245887e+01   0.0000000e+00   5.7166697e+01  -1.8143877e+02  -8.9699062e+01
   2.5902185e+01  -2.7140794e+01   0.0000000e+00   8.2909790e+01  -1.7130602e+02  -7.6830414e+01
   2.5981446e+01  -2.7033159e+01   0.0000000e+00   7.2617321e+01  -1.1833103e+02  -1.1178961e+02
   2.6056348e+01  -2.6923116e+01   0.0000000e+00   7.9067878e+01   9.7692509e-01  -9.2504628e+01
   2.6126811e+01  -2.6810803e+01   0.0000000e+00   4.9256439e+01   5.6915588e+01  -1.6082699e+01
   2.6192761e+01  -2.6696360e+01   0.0000000e+00   2.3721666e+01   5.3288738e+01   5.8600087e+01
   2.6254129e+01  -2.6579929e+01   0.0000000e+00  -3.7734349e+01   2.9572411e+01   9.1814795e+01
   2.6310856e+01  -2.6461654e+01   0.0000000e+00  -8.1842393e+01   2.9777780e+01   5.3134467e+01
   2.6362886e+01  -2.6341682e+01   0.0000000e+00  -9.5365127e+01   4.3701618e+01   5.2249137e+00
   2.6410170e+01  -2.6220159e+01   0.0000000e+00  -6.4904996e+01   6.2392883e+01  -4.8424745e+00
   2.6452665e+01  -2.6097235e+01   0.0000000e+00  -1.0037697e+02   4.8073487e+01   4.6946866e+01
   2.6490336e+01  -2.5973060e+01   0.0000000e+00  -1.6008661e+02   3.8670272e+00  -6.3306033e+01
   2.6523153e+01  -2.5847785e+01   0.0000000e+00  -4.7381482e+01  -1.2360063e+00  -1.6403727e+02
   2.6551090e+01  -2.5721561e+01   0.0000000e+00   1.0995371e+01  -1.2081638e+01  -1.2221087e+02
   2.6574131e+01  -2.5594542e+01   0.0000000e+00   3.5405299e+01  -3.7742064e+01  -1.1545578e+02
   2.6592264e+01  -2.5466880e+01   0.0000000e+00   6.5297567e+01  -3.4040758e+01  -3.8703956e+01
   2.6605482e+01  -2.5338729e+01   0.0000000e+00  -3.2500161e+00  -2.5406934e+01  -3.1414917e+00
   2.6613785e+01  -2.5210243e+01   0.0000000e+00   1.5422000e+00  -3.3914967e+01  -3.6655800e+01
   2.6617180e+01  -2.5081574e+01   0.0000000e+00   3.3133215e+01  -3.4924627e+01  -7.4218707e+00
   2.6615678e+01  -2.4952875e+01   0.0000000e+00   4.2206549e+01  -3.4028778e+01  -4.0216804e+00
   2.6609296e+01  -2.4824299e+01   0.0000000e+00   7.4006701e+01  -2.5770410e+01   2.1602477e+01
   2.6598056e+01  -2.4695999e+01   0.0000000e+00   6.6145193e+01  -9.0680657e+00   6.0291003e+01
   2.6581987e+01  -2.4568124e+01   0.0000000e+00   7.4347638e+01  -2.6503888e+01   8.7449548e+01
   2.6561123e+01  -2.4440827e+01   0.0000000e+00   5.3528872e+01  -8.1563743e+01   1.7092853e+02
   2.6535501e+01  -2.4314254e+01   0.0000000e+00  -4.9854672e+01  -1.0724787e+02   2.1961683e+02
   2.6505167e+01  -2.4188555e+01   0.0000000e+00  -1.4919630e+02  -7.9548383e+01   1.4699657e+02
   2.6470168e+01  -2.4063876e+01   0.0000000e+00  -1.5041758e+02  -6.1711839e+01   2.0856039e+01
   2.6430559e+01  -2.3940361e+01   0.0000000e+00  -1.0361991e+02  -5.4993901e+01  -2.3668017e+00
   2.6386398e+01  -2.3818154e+01   0.0000000e+00  -1.2590081e+02  -3.0034006e+01   1.7755408e+00
   2.6337749e+01  -2.3697395e+01   0.0000000e+00  -1.4322875e+02   2.4578118e+01  -4.8584306e+01
   2.6284679e+01  -2.3578225e+01   0.0000000e+00  -1.0858832e+02   3.1825651e+01  -1.0583609e+02
   2.6227262e+01  -2.3460779e+01   0.0000000e+00  -4.3850549e-02  -1.5180195e+00  -1.3071395e+02
   2.6165574e+01  -2.3345193e+01   0.0000000e+00   1.1138913e+02   3.0918718e+01  -7.3554527e+01
   2.6099696e+01  -2.3231599e+01   0.0000000e+00   9.9244431e+01   8.1535272e-01   4.0801235e+01
   2.6029713e+01  -2.3120126e+01   0.0000000e+00  -3.2535660e+01  -2.1424774e+01   8.3894392e+01
   2.5955714e+01  -2.3010902e+01   0.0000000e+00  -6.7302790e+01   7.8895852e+00  -8.0681945e+01
   2.5877794e+01  -2.2904050e+01   0.0000000e+00   6.3203390e+01  -1.5938639e+01  -1.2138490e+02
   2.5796047e+01  -2.2799692e+01   0.0000000e+00   6.6535817e+01   1.3957769e+01  -3.3672998e+01
   2.5710576e+01  -2.2697946e+01   0.0000000e+00   3.1504067e+01   3.8727860e+00  -5.5598067e+01
   2.5621484e+01  -2.2598927e+01   0.0000000e+00   4.8956707e+01  -1.1291963e+00  -2.1923790e+01
   2.5528878e+01  -2.2502747e+01   0.0000000e+00   2.8340630e+01   4.5439193e+01  -1.4854692e+01
   2.5432870e+01  -2.2409513e+01   0.0000000e+00   3.3109377e+01   4.3787119e+01  -3.6687144e+01
   2.5333573e+01  -2.2319331e+01   0.0000000e+00   5.0784522e+01   3.3010097e+01  -2.1014272e+01
   2.5231104e+01  -2.2232302e+01   0.0000000e+00   4.8600682e+01   4.3470440e+01   5.2318915e-01
   2.5125583e+01  -2.2148524e+01   0.0000000e+00   6.6385868e+01   6.6650334e+01  -2.2536375e+01
   2.5017132e+01  -2.2068090e+01   0.0000000e+00   1.0927149e+02   3.9946836e+01  -6.2749023e+00
   2.4905878e+01  -2.1991089e+01   0.0000000e+00   8.3361038e+01   3.1954171e+01   2.5028922e+01
   2.4791947e+01  -2.1917609e+01   0.0000000e+00   6.1301580e+01  -5.6397012e+00  -1.5904880e+00
   2.4675470e+01  -2.1847731e+01   0.0000000e+00   4.0139407e+01  -3.0060222e+01   1.2037468e+01
   2.4556580e+01  -2.1781533e+01   0.0000000e+00   5.4609157e+01  -7.3248625e+01   1.2811308e+01
   2.4435411e+01  -2.1719088e+01   0.0000000e+00   4.0615174e+01  -9.9656257e+01   1.5839328e+02
   2.4312100e+01  -2.1660467e+01   0.0000000e+00  -1.1064622e+02   2.9236545e+01   1.3085900e+02
   2.4186786e+01  -2.1605733e+01   0.0000000e+00  -7.8002174e+01  -6.9497306e+00  -4.2963215e+01
   2.4059608e+01  -2.1554947e+01   0.0000000e+00   1.9706862e+01  -1.4914626e+01   4.2704879e+01
   2.3930710e+01  -2.1508167e+01   0.0000000e+00  -6.8118492e+00   7.7602350e+01   3.6007998e+01
   2.3800234e+01  -2.1465444e+01   0.0000000e+00  -1.8779213e+01   6.9244536e+01  -3.3745971e+01
   2.3668325e+01  -2.1426825e+01   0.0000000e+00  -1.6007216e+01   5.3967188e+01  -9.3251295e+01
   2.3535131e+01  -2.1392352e+01   0.0000000e+00   1.9302551e+01  -2.2241755e+01  -1.1669560e+02
   2.3400797e+01  -2.1362065e+01   0.0000000e+00   4.4698357e+01  -5.7534932e+01  -4.6913035e+01
   2.3265473e+01  -2.1335996e+01   0.0000000e+00   4.6734105e+01  -4.1567719e+01  -5.4930580e+00
   2.3129308e+01  -2.1314174e+01   0.0000000e+00   3.8444882e+01  -7.3708115e+00   6.3410148e+00
   2.2992451e+01  -2.1296624e+01   0.0000000e+00   1.1345335e+01   6.4371434e+00  -2.3532602e+01
   2.2855053e+01  -2.1283364e+01   0.0000000e+00  -1.4947848e+01  -1.4590963e+01  -3.3660463e+01
   2.2717265e+01  -2.1274410e+01   0.0000000e+00  -2.4153543e+01  -4.0747463e+01  -4.0465229e+01
   2.2579239e+01  -2.1269771e+01   0.0000000e+00  -1.6753693e+01  -7.7107741e+01   6.2360747e+00
   2.2441126e+01  -2.1269452e+01   0.0000000e+00  -4.3267343e+01  -4.0489245e+01   7.9974210e+01
   2.2303077e+01  -2.1273454e+01   0.0000000e+00  -8.9180296e+01   1.3302928e+01   7.7953872e+01
   2.2165245e+01  -2.1281773e+01   0.0000000e+00  -1.1317844e+02   2.4393237e+01   3.0550333e+01
   2.2027780e+01  -2.1294398e+01   0.0000000e+00  -1.2123417e+02  -1.1764738e+01  -2.7088351e+00
   2.1890834e+01  -2.1311317e+01   0.0000000e+00  -1.1824251e+02  -4.3131198e+01   2.2317367e+01
   2.1754557e+01  -2.1332510e+01   0.0000000e+00  -1.0585593e+02  -2.8327374e+01   5.0385899e+01
   2.1619100e+01  -2.1357955e+01   0.0000000e+00  -7.5662528e+01  -1.2338006e+01   3.9265661e+01
   2.1484611e+01  -2.1387622e+01   0.0000000e+00  -4.8898875e+01  -2.5378241e+01   2.6003635e+01
   2.1351239e+01  -2.1421479e+01   0.0000000e+00  -3.0416348e+01  -3.7242412e+01   2.2891000e+01
   2.1219132e+01  -2.1459490e+01   0.0000000e+00  -2.0834989e+01  -7.4721319e+01   1.9173438e+01
   2.1088435e+01  -2.1501611e+01   0.0000000e+00  -3.9750663e+01  -7.8602819e+01   8.0494332e+01
   2.0959295e+01  -2.1547796e+01   0.0000000e+00  -5.5165837e+01  -6.0617774e+00   9.7938154e+01
   2.0831855e+01  -2.1597994e+01   0.0000000e+00  -5.5279053e+01   1.4539645e+01   7.5859569e+01
   2.0706257e+01  -2.1652149e+01   0.0000000e+00  -5.2657565e+01   5.0285987e+01   6.0491695e+01
   2.0582642e+01  -2.1710202e+01   0.0000000e+00  -7.0699192e+01   5.2559522e+01   8.2926181e+00
   2.0461148e+01  -2.1772087e+01   0.0000000e+00  -6.5382770e+01   3.0945882e+01   2.8672727e+01
   2.0341913e+01  -2.1837736e+01   0.0000000e+00  -2.1598233e+01   5.3939321e+01   1.1535770e+01
   2.0225072e+01  -2.1907076e+01   0.0000000e+00  -1.2670551e+01   2.6869064e+01  -3.7325381e+01
   2.0110758e+01  -2.1980030e+01   0.0000000e+00  -3.3386805e+01   4.7492074e+00  -2.5115542e+01
   1.9999101e+01  -2.2056517e+01   0.0000000e+00  -4.4984141e+01   1.6153836e+01  -2.3008400e-01
   1.9890229e+01  -2.2136450e+01   0.0000000e+00  -4.4374266e+01   4.4886208e+01  -1.2524993e+01
   1.9784268e+01  -2.2219741e+01   0.0000000e+00  -7.0402829e+01   4.4820325e+01  -4.1141995e+01
   1.9681341e+01  -2.2306297e+01   0.0000000e+00  -1.0095779e+02   4.0253244e+01  -1.9948601e+01
   1.9581569e+01  -2.2396020e+01   0.0000000e+00  -1.1391283e+02   5.0403105e+01   1.4626707e+01
   1.9485068e+01  -2.2488810e+01   0.0000000e+00  -9.6370335e+01   5.8195265e+01   5.3578128e+01
   1.9391954e+01  -2.2584563e+01   0.0000000e+00  -6.3534003e+01   6.7271647e+01   5.8495110e+01
   1.9302337e+01  -2.2683170e+01   0.0000000e+00  -5.1690310e+01   6.0717262e+01   5.7621176e+01
   1.9216325e+01  -2.2784521e+01   0.0000000e+00  -4.0127471e+01   5.9265580e+01   6.6645639e+01
   1.9134023e+01  -2.2888502e+01   0.0000000e+00  -2.4189078e+01   4.8880193e+01   7.9242000e+01
   1.9055532e+01  -2.2994993e+01   0.0000000e+00   3.1806534e+00   5.0572201e+01   8.1865027e+01
   1.8980949e+01  -2.3103875e+01   0.0000000e+00   7.4262161e+00   4.7976007e+01   6.3812466e+01
   1.8910369e+01  -2.3215024e+01   0.0000000e+00   1.1291996e+01   3.8138268e+01   6.3350005e+01
   1.8843880e+01  -2.3328314e+01   0.0000000e+00   2.0098267e+01   3.2726886e+01   5.6753995e+01
   1.8781568e+01  -2.3443614e+01   0.0000000e+00   3.6132602e+01   2.6297107e+01   5.0900200e+01
   1.8723516e+01  -2.3560794e+01   0.0000000e+00   4.7005288e+01   1.8932184e+01   1.3999285e+01
   1.8669801e+01  -2.3679719e+01   0.0000000e+00   2.3102682e+01  -4.4697446e+00  -4.8928574e+00
   1.8620496e+01  -2.3800252e+01   0.0000000e+00   8.1081331e+00  -1.3801588e+01   9.0061264e-01
   1.8575669e+01  -2.3922254e+01   0.0000000e+00  -9.7866048e+00  -1.2305753e+01   1.4353626e+01
   1.8535385e+01  -2.4045585e+01   0.0000000e+00  -9.3325014e+00   3.5604048e-01   3.2830260e+01
   1.8499702e+01  -2.4170102e+01   0.0000000e+00  -1.6046546e+01   1.3322732e+01   3.8006800e+01
   1.8468677e+01  -2.4295659e+01   0.0000000e+00  -1.0868284e+01   2.7251874e+01   5.9549517e+01
   1.8442357e+01  -2.4422112e+01   0.0000000e+00   1.9086517e+00   4.6102836e+01   5.7493303e+01
   1.8420789e+01  -2.4549313e+01   0.0000000e+00   1.0224914e+01   4.7541180e+01   6.2966463e+01
   1.8404011e+01  -2.4677111e+01   0.0000000e+00   3.3647399e+01   2.8973228e+01   4.9226308e+01
   1.8392057e+01  -2.4805359e+01   0.0000000e+00   3.4306626e+01  -1.9389181e+00   3.0822484e+01
   1.8384957e+01  -2.4933903e+01   0.0000000e+00   3.7393223e+01  -2.7534470e+01   1.7839970e+01
   1.8382734e+01  -2.5062593e+01   0.0000000e+00   1.2614578e+01  -4.9712384e+01   7.5210898e+00
   1.8385406e+01  -2.5191276e+01   0.0000000e+00  -7.1461655e+00  -6.1771396e+01   2.6403704e+01
   1.8392985e+01  -2.5319800e+01   0.0000000e+00  -1.7154204e+01  -7.2234426e+01   4.1384842e+01
   1.8405478e+01  -2.5448010e+01   0.0000000e+00  -1.7211800e+01  -7.9273372e+01   7.1855178e+01
   1.8422886e+01  -2.5575753e+01   0.0000000e+00   3.2005427e+00  -8.3805057e+01   9.8700879e+01
   1.8445204e+01  -2.5702876e+01   0.0000000e+00   3.9093932e+01  -1.0238062e+02   1.0192353e+02
   1.8472420e+01  -2.5829227e+01   0.0000000e+00   5.5149033e+01  -1.0655028e+02   4.3709102e+01
   1.8504519e+01  -2.5954652e+01   0.0000000e+00   1.8628015e+01  -1.0293917e+02   1.2113628e+01
   1.8541475e+01  -2.6078999e+01   0.0000000e+00   8.8195790e+00  -9.9807752e+01   1.4716125e+01
   1.8583262e+01  -2.6202117e+01   0.0000000e+00   5.2255552e+00  -8.1052078e+01   7.5319154e+00
   1.8629842e+01  -2.6323855e+01   0.0000000e+00   1.8990208e+01  -4.2907837e+01  -2.3117436e+01
   1.8681175e+01  -2.6444066e+01   0.0000000e+00  -3.0604368e+01   1.1053741e+01  -6.4478279e+01
   1.8737212e+01  -2.6562600e+01   0.0000000e+00  -7.5739850e+01   3.1257708e+01   9.3979470e+00
   1.8797900e+01  -2.6679312e+01   0.0000000e+00  -2.0040691e+01   2.7632783e+01   5.2006719e+01
   1.8863178e+01  -2.6794057e+01   0.0000000e+00  -1.7302680e+01   2.5558083e+01   3.9215669e+01
   1.8932980e+01  -2.6906693e+01   0.0000000e+00  -4.2722092e+01  -1.9066878e+00   6.7673202e+01
   1.9007232e+01  -2.7017079e+01   0.0000000e+00  -5.7424223e+01  -5.0432437e+01   7.8192974e+01
   1.9085856e+01  -2.7125079e+01   0.0000000e+00  -7.4686615e+01  -5.2597817e+01   8.4392010e+01
   1.9168766e+01  -2.7230555e+01   0.0000000e+00  -4.5472584e+01  -4.2615366e+01   1.3800590e+02
   1.9255870e+01  -2.7333376e+01   0.0000000e+00   6.8242339e+00  -8.6706111e+01   1.2158718e+02
   1.9347071e+01  -2.7433411e+01   0.0000000e+00  -7.3994093e+00  -9.3109863e+01   7.8449124e+01
   1.9442266e+01  -2.7530535e+01   0.0000000e+00  -3.2743193e-01  -1.1460423e+02   6.3923488e+01
   1.9541343e+01  -2.7624624e+01   0.0000000e+00  -1.6668171e+01  -9.4174081e+01   4.2578270e+00
   1.9644189e+01  -2.7715557e+01   0.0000000e+00   3.5183214e+00  -6.7663030e+01   4.5746077e+01
   1.9750682e+01  -2.7803219e+01   0.0000000e+00   8.0248456e+01  -1.1655966e+02  -5.8134512e+01
   1.9860694e+01  -2.7887498e+01   0.0000000e+00  -3.2526529e+01  -6.4075663e+01  -1.7844138e+02
   1.9974094e+01  -2.7968285e+01   0.0000000e+00  -8.6226796e+01  -2.9233891e+01  -1.0989494e+02
   2.0090744e+01  -2.8045476e+01   0.0000000e+00  -7.0239776e+01   9.5753517e-01  -1.1311642e+02
   2.0210501e+01  -2.8118972e+01   0.0000000e+00  -1.2843376e+02   6.8229191e+01  -4.5744103e+01
   2.0333216e+01  -2.8188677e+01   0.0000000e+00  -1.0980115e+02   6.8392257e+01   9.9614370e+01
   2.0458737e+01  -2.8254501e+01   0.0000000e+00  -3.0783891e+01   1.7863063e+01   1.8165926e+02
   2.0586908e+01  -2.8316358e+01   0.0000000e+00   4.4033193e+01  -6.1461604e+01   2.1405516e+02
   2.0717566e+01  -2.8374168e+01   0.0000000e+00   1.3911573e+02  -2.3770176e+02   9.7346105e+01
   2.0850545e+01  -2.8427855e+01   0.0000000e+00   1.8081585e+02  -2.1419840e+02  -2.4048332e+02
   2.0985676e+01  -2.8477349e+01   0.0000000e+00   1.0274377e+02  -2.8131096e+01  -2.3421004e+02
   2.1122786e+01  -2.8522585e+01   0.0000000e+00   5.0546738e+01  -1.5177107e+02  -2.4425201e+02
   2.1261698e+01  -2.8563504e+01   0.0000000e+00  -8.6364272e+01   2.6701467e+01  -4.4343444e+02
   2.1402232e+01  -2.8600051e+01   0.0000000e+00  -1.6065831e+02   1.4826465e+02  -1.3874573e+02
   2.1544205e+01  -2.8632180e+01   0.0000000e+00  -2.6975519e+01  -2.9466985e+01  -9.9466245e+01
   2.1687434e+01  -2.8659846e+01   0.0000000e+00   9.1729051e+00   1.0567320e+02  -1.3816503e+02
   2.1831730e+01  -2.8683015e+01   0.0000000e+00  -6.4497021e-01   6.9486774e+01   3.5386358e+01
   2.1976905e+01  -2.8701654e+01   0.0000000e+00   7.0032152e+00  -3.4770324e+01   2.4464563e+01
   2.2122768e+01  -2.8715741e+01   0.0000000e+00   8.5934243e+01  -1.2041052e+02   2.4552125e+01
   2.2871159e+01  -2.8845191e+01   0.0000000e+00   1.3862479e+02  -1.7327698e+02   4.2818165e+02
   2.3016710e+01  -2.8831814e+01   0.0000000e+00  -1.5833401e+02   1.4993969e+02   7.7377765e+01
   2.3161629e+01  -2.8814061e+01   0.0000000e+00  -1.6503799e+02   2.1571106e+02   4.5313778e+02
   2.3305737e+01  -2.8791954e+01   0.0000000e+00  -9.0461894e+01  -1.3478734e+02   2.8057804e+02
   2.3448861e+01  -2.8765519e+01   0.0000000e+00  -4.0449788e+01  -7.3735292e+00   3.0710084e+01
   2.3590824e+01  -2.8734790e+01   0.0000000e+00  -1.3826970e+01   2.1240365e+01   8.7680872e+01
   2.3731456e+01  -2.8699805e+01   0.0000000e+00  -2.0203853e+00   8.8352341e+00   5.6260665e+01
   2.3870586e+01  -2.8660605e+01   0.0000000e+00  -2.7089103e+01   1.1742211e+00   7.7376884e+01
   2.4008046e+01  -2.8617239e+01   0.0000000e+00  -3.3600998e+01  -2.5457936e+01   3.4609068e+01
   2.4143671e+01  -2.8569760e+01   0.0000000e+00  -4.0029185e+01  -3.0676581e+01   3.8322884e+01
   2.4277300e+01  -2.8518226e+01   0.0000000e+00  -7.4697317e+01  -7.0681605e+01  -6.0527937e+01
   2.4408774e+01  -2.8462700e+01   0.0000000e+00  -4.3268239e+01   3.7766506e+01  -1.3831881e+02
   2.4537936e+01  -2.8403249e+01   0.0000000e+00  -6.1838351e+01   9.4534864e+01  -6.1280916e+01
   2.4664636e+01  -2.8339946e+01   0.0000000e+00  -7.9914884e+01   1.0170711e+02  -3.4139670e+01
   2.4788725e+01  -2.8272867e+01   0.0000000e+00  -5.3537953e+01   9.6076235e+01   2.9714251e+01
   2.4910059e+01  -2.8202094e+01   0.0000000e+00  -5.4689982e+01   5.0947940e+01   5.8894935e+01
   2.5028498e+01  -2.8127711e+01   0.0000000e+00  -4.5638367e+01   3.7254209e+01   3.6021669e+01
   2.5143907e+01  -2.8049808e+01   0.0000000e+00  -3.5625179e+00   5.1368606e+01   1.9944372e+01
   2.5256155e+01  -2.7968479e+01   0.0000000e+00   4.9240154e+01   5.8730887e+01   1.0004282e+02
   2.5365115e+01  -2.7883822e+01   0.0000000e+00   2.9646282e+01  -7.0986101e+00   1.6819077e+02
   2.5470667e+01  -2.7795936e+01   0.0000000e+00  -2.2978234e+01  -2.6488028e+01   1.5029547e+02
   2.5572694e+01  -2.7704927e+01   0.0000000e+00  -1.2523109e+02  -3.4141741e+01   1.0689379e+02
   2.5671085e+01  -2.7610903e+01   0.0000000e+00  -1.6350029e+02  -3.9733425e+01  -4.6981356e+01
   2.5765733e+01  -2.7513975e+01   0.0000000e+00  -9.3539333e+01  -3.5674463e+01  -1.1044400e+02
   2.5856538e+01  -2.7414257e+01   0.0000000e+00  -8.7285176e+01  -9.3986158e+01  -1.5259189e+02
   2.5943405e+01  -2.7311868e+01   0.0000000e+00  -3.6353016e+01  -1.1220599e+02  -2.5039136e+02
   2.6026242e+01  -2.7206926e+01   0.0000000e+00   4.5116851e+01  -9.6282909e+01  -2.6874956e+02
   2.6104966e+01  -2.7099554e+01   0.0000000e+00   1.1310739e+02  -6.2138327e+00  -2.2762725e+02
   2.6179498e+01  -2.6989879e+01   0.0000000e+00   1.2563069e+02   9.8430257e+01  -5.7808966e+01
   2.6249764e+01  -2.6878026e+01   0.0000000e+00   4.3937275e+01   8.6755043e+01   6.2331830e+01
   2.6315695e+01  -2.6764125e+01   0.0000000e+00   1.2489289e+01   3.9510479e+01   7.9065634e+01
   2.6377231e+01  -2.6648309e+01   0.0000000e+00  -1.1111732e+01   1.2369723e+01   9.3834683e+01
   2.6434314e+01  -2.6530709e+01   0.0000000e+00  -4.3219701e+01   2.6126557e+01   8.4362931e+01
   2.6486893e+01  -2.6411461e+01   0.0000000e+00  -7.5367359e+01   5.1029882e+01   8.0527449e+01
   2.6534923e+01  -2.6290702e+01   0.0000000e+00  -8.2301187e+01   4.6591735e+01   6.1654200e+01
   2.6578363e+01  -2.6168567e+01   0.0000000e+00  -8.5925600e+01   8.1033070e+00   7.5217841e+01
   2.6617180e+01  -2.6045196e+01   0.0000000e+00  -1.6144651e+02  -2.3954185e+01   1.8637334e+00
   2.6651344e+01  -2.5920729e+01   0.0000000e+00  -1.0512462e+02  -3.3350539e+00  -1.4351787e+02
   2.6680833e+01  -2.5795305e+01   0.0000000e+00  -5.6971621e+00   2.9844505e+01  -1.2696480e+02
   2.6705628e+01  -2.5669065e+01   0.0000000e+00  -2.1757335e+01   3.5738593e+01  -1.2422067e+02
   2.6725717e+01  -2.5542152e+01   0.0000000e+00   4.0016704e+01   9.3759700e+00  -1.3738057e+02
   2.6741092e+01  -2.5414705e+01   0.0000000e+00   4.5487447e+01  -2.5526691e+00  -2.7436015e+01
   2.6751752e+01  -2.5286867e+01   0.0000000e+00  -4.5750855e+01  -2.6833273e+01  -2.4649369e+01
   2.6757700e+01  -2.5158780e+01   0.0000000e+00  -2.3079265e+00  -9.7288412e+01  -6.5073178e+01
   2.6758944e+01  -2.5030584e+01   0.0000000e+00   5.3687861e+01  -9.6521904e+01  -2.4330110e+01
   2.6755498e+01  -2.4902422e+01   0.0000000e+00   6.8670126e+01  -5.0913822e+01  -6.3169418e+00
   2.6747379e+01  -2.4774434e+01   0.0000000e+00   8.3016679e+01  -4.9648936e+01   4.6926387e+01
   2.6734612e+01  -2.4646759e+01   0.0000000e+00   5.4345581e+01  -4.8674180e+01   9.6132809e+01
   2.6717224e+01  -2.4519538e+01   0.0000000e+00   2.1113858e+01  -6.7404129e+01   1.1225965e+02
   2.6695248e+01  -2.4392908e+01   0.0000000e+00  -2.8907602e+01  -1.1732962e+02   1.1985113e+02
   2.6668722e+01  -2.4267007e+01   0.0000000e+00  -7.6173206e+01  -1.3775568e+02   1.0301812e+02
   2.6637687e+01  -2.4141970e+01   0.0000000e+00  -1.0762697e+02  -8.5989021e+01   6.4647600e+01
   2.6602190e+01  -2.4017934e+01   0.0000000e+00  -9.9286578e+01  -1.8078172e+01   1.7780464e+00
   2.6562281e+01  -2.3895031e+01   0.0000000e+00  -8.0804882e+01  -6.0477928e+00  -2.1922374e+01
   2.6518015e+01  -2.3773393e+01   0.0000000e+00  -7.7146303e+01   1.0827389e+01  -1.7584169e+01
   2.6469452e+01  -2.3653150e+01   0.0000000e+00  -1.3659419e+02   3.9239582e+01  -9.7321322e+00
   2.6416655e+01  -2.3534430e+01   0.0000000e+00  -2.0973667e+02  -3.5079087e+01  -1.6548398e+02
   2.6359690e+01  -2.3417361e+01   0.0000000e+00   8.3402656e+00  -1.4033001e+02  -2.5321248e+02
   2.6298630e+01  -2.3302065e+01   0.0000000e+00   1.4314952e+02  -6.3724380e+01  -1.0879578e+01
   2.6233547e+01  -2.3188666e+01   0.0000000e+00  -2.5625824e+01  -7.8680119e+00   2.2521060e+01
   2.6164521e+01  -2.3077283e+01   0.0000000e+00  -5.4192956e+01  -6.8878493e+01  -9.4553605e+01
   2.6091634e+01  -2.2968034e+01   0.0000000e+00   2.8310094e+01   1.6430115e+00  -1.1417716e+02
   2.6014971e+01  -2.2861034e+01   0.0000000e+00   1.2349461e+02   3.9425995e+01  -9.5744717e+01
   2.5934621e+01  -2.2756394e+01   0.0000000e+00   1.1434145e+02   4.3222888e+01   1.8348893e+01
   2.5850676e+01  -2.2654226e+01   0.0000000e+00   5.3178729e+01   7.9678750e+01  -1.5701353e+01
   2.5763230e+01  -2.2554635e+01   0.0000000e+00   1.0318346e+02   3.7561585e+01  -2.2378012e+01
   2.5672383e+01  -2.2457726e+01   0.0000000e+00   8.0276572e+01   5.9328407e+01   6.6108747e+01
   2.5578234e+01  -2.2363601e+01   0.0000000e+00   3.4658973e+01   7.8945274e+01   3.3646000e+01
   2.5480888e+01  -2.2272356e+01   0.0000000e+00   3.8646425e+01   4.4493926e+01   1.5364453e+01
   2.5380451e+01  -2.2184087e+01   0.0000000e+00   3.1569833e+01   2.3827525e+01   2.7499591e+01
   2.5277033e+01  -2.2098885e+01   0.0000000e+00   2.9738049e+01   1.6183261e+01   3.8069329e+01
   2.5170746e+01  -2.2016839e+01   0.0000000e+00   3.8153748e+01   1.4373673e+01   4.5277784e+01
   2.5061703e+01  -2.1938034e+01   0.0000000e+00   1.6969434e+01   2.1809777e+00   5.5873220e+01
   2.4950021e+01  -2.1862551e+01   0.0000000e+00   5.8020061e+00  -3.5790307e+00   2.5034536e+01
   2.4835818e+01  -2.1790468e+01   0.0000000e+00   4.0667136e+01  -1.9181384e+01   1.4473669e+01
   2.4719216e+01  -2.1721859e+01   0.0000000e+00   3.6319688e+01  -1.1426479e+01   7.8741597e+00
   2.4600336e+01  -2.1656796e+01   0.0000000e+00   3.6218401e+01  -7.1812806e+01   1.5975013e+01
   2.4479304e+01  -2.1595345e+01   0.0000000e+00  -3.1777690e+01  -4.7123414e+01   1.1099138e+02
   2.4356246e+01  -2.1537569e+01   0.0000000e+00  -6.9591775e+01   4.8324335e+01  -1.5723486e+01
   2.4231289e+01  -2.1483527e+01   0.0000000e+00   4.6218134e+01  -5.1323410e+01  -5.0724098e+01
   2.4104564e+01  -2.1433276e+01   0.0000000e+00   3.9066791e+01  -1.4789268e+01   1.1940225e+02
   2.3976201e+01  -2.1386867e+01   0.0000000e+00  -1.1457402e+01   8.7976004e+01   5.0273467e+01
   2.3846332e+01  -2.1344346e+01   0.0000000e+00   2.4665096e+01   7.2490164e+01  -3.5868766e+01
   2.3715091e+01  -2.1305759e+01   0.0000000e+00   4.7612545e+01   6.9799763e+01  -8.9921297e+01
   2.3582613e+01  -2.1271144e+01   0.0000000e+00   6.2921396e+01  -6.7779715e+00  -1.1234937e+02
   2.3449032e+01  -2.1240537e+01   0.0000000e+00   5.7706956e+01  -5.3791563e+01  -4.0976829e+01
   2.3314487e+01  -2.1213968e+01   0.0000000e+00   5.5852746e+01  -5.0168162e+01   1.0187877e+01
   2.3179113e+01  -2.1191466e+01   0.0000000e+00   5.1962437e+01  -9.0258736e+00   5.3533003e+01
   2.3043048e+01  -2.1173053e+01   0.0000000e+00   2.4464890e+01   4.0826127e+01   1.5087884e+01
   2.2906432e+01  -2.1158749e+01   0.0000000e+00   4.5422592e+00   1.6066007e+01  -4.8286356e+01
   2.2769404e+01  -2.1148566e+01   0.0000000e+00   1.4074557e+01  -3.1819702e+01  -6.0336433e+01
   2.2632101e+01  -2.1142517e+01   0.0000000e+00   1.0810772e+01  -6.0459635e+01   6.6990771e+00
   2.2494664e+01  -2.1140607e+01   0.0000000e+00  -5.8448499e+01  -1.7744002e-01   6.5692166e+01
   2.2357233e+01  -2.1142839e+01   0.0000000e+00  -1.2904783e+02   4.9245300e+01   5.2464170e+00
   2.2219947e+01  -2.1149209e+01   0.0000000e+00  -1.3770357e+02   3.4318611e+01  -6.4624095e+01
   2.2082945e+01  -2.1159712e+01   0.0000000e+00  -1.1861451e+02   1.4706386e+00  -1.0336349e+02
   2.1946367e+01  -2.1174336e+01   0.0000000e+00  -1.1065543e+02  -4.1561081e+01  -8.8903171e+01
   2.1810352e+01  -2.1193067e+01   0.0000000e+00  -1.1205184e+02  -4.6156144e+01  -4.7271969e+01
   2.1675037e+01  -2.1215886e+01   0.0000000e+00  -1.0504032e+02  -4.2136283e+01  -2.1377938e+01
   2.1540561e+01  -2.1242768e+01   0.0000000e+00  -7.9562938e+01  -4.2056183e+01   3.4501729e+00
   2.1407062e+01  -2.1273688e+01   0.0000000e+00  -6.1334810e+01  -4.0313755e+01   1.1062432e+01
   2.1274674e+01  -2.1308613e+01   0.0000000e+00  -5.1060337e+01  -6.1911605e+01   1.4871262e+01
   2.1143535e+01  -2.1347507e+01   0.0000000e+00  -3.6186673e+01  -8.2222799e+01   6.2227398e+01
   2.1013778e+01  -2.1390331e+01   0.0000000e+00  -3.8479421e+01  -1.9915967e+01   9.9364943e+01
   2.0885538e+01  -2.1437040e+01   0.0000000e+00  -6.6373495e+01   2.8476398e+01   6.2312031e+01
   2.0758945e+01  -2.1487588e+01   0.0000000e+00  -7.9159397e+01   2.6595446e+01   6.4338522e+01
   2.0634131e+01  -2.1541921e+01   0.0000000e+00  -4.8115897e+01   5.7048185e+01   3.1630961e+01
   2.0511225e+01  -2.1599984e+01   0.0000000e+00  -3.6738014e+01   2.2656309e+01  -3.3182101e+01
   2.0390356e+01  -2.1661718e+01   0.0000000e+00  -3.8922293e+01   7.0629540e-01  -7.0739989e+00
   2.0271649e+01  -2.1727059e+01   0.0000000e+00  -1.6398425e+01   1.4960665e+01   1.9573699e+00
   2.0155228e+01  -2.1795940e+01   0.0000000e+00   2.7838584e+00   7.1243590e+00   9.2617684e-01
   2.0041217e+01  -2.1868290e+01   0.0000000e+00  -1.0746862e+01   2.1954704e+01  -9.5758577e+00
   1.9929736e+01  -2.1944034e+01   0.0000000e+00  -3.9503182e+01   2.3675962e+01  -1.0021055e+01
   1.9820903e+01  -2.2023094e+01   0.0000000e+00  -2.8175683e+01   3.4870358e+01  -6.6679058e+00
   1.9714834e+01  -2.2105388e+01   0.0000000e+00  -2.6964443e+01   2.8425013e+01  -3.7092164e+01
   1.9611643e+01  -2.2190831e+01   0.0000000e+00  -4.4145020e+01   1.9596028e+01  -3.6816756e+01
   1.9511443e+01  -2.2279334e+01   0.0000000e+00  -6.3804469e+01   2.7605864e+01  -3.6880740e+01
   1.9414341e+01  -2.2370806e+01   0.0000000e+00  -8.3515743e+01   3.0924317e+01  -8.2232621e+00
   1.9320445e+01  -2.2465151e+01   0.0000000e+00  -7.1264394e+01   4.8445045e+01   1.9565720e+01
   1.9229858e+01  -2.2562272e+01   0.0000000e+00  -5.8306670e+01   4.6829834e+01   2.9612147e+01
   1.9142681e+01  -2.2662066e+01   0.0000000e+00  -4.2193696e+01   4.9424320e+01   3.9047891e+01
   1.9059011e+01  -2.2764431e+01   0.0000000e+00  -4.2556550e+01   4.6737462e+01   4.3979259e+01
   1.8978944e+01  -2.2869257e+01   0.0000000e+00  -2.4503417e+01   5.2482166e+01   7.0994576e+01
   1.8902571e+01  -2.2976436e+01   0.0000000e+00  -2.3501061e+00   6.6020597e+01   4.9091422e+01
   1.8829981e+01  -2.3085855e+01   0.0000000e+00  -1.3008372e+01   5.1888647e+01   4.0180830e+01
   1.8761258e+01  -2.3197399e+01   0.0000000e+00   1.5136714e-01   4.4176782e+01   4.5701786e+01
   1.8696485e+01  -2.3310949e+01   0.0000000e+00   6.1789149e+00   3.3759702e+01   3.9354244e+01
   1.8635740e+01  -2.3426387e+01   0.0000000e+00   2.6658348e+01   2.3813061e+01   3.6207058e+01
   1.8579096e+01  -2.3543589e+01   0.0000000e+00   2.9728818e+01   5.2665748e+00   6.0327135e+00
   1.8526625e+01  -2.3662432e+01   0.0000000e+00   1.2652956e+01  -1.3430754e+01   1.0878265e+01
   1.8478394e+01  -2.3782787e+01   0.0000000e+00   1.1526629e+01  -1.2420774e+01   1.6026622e+01
   1.8434464e+01  -2.3904529e+01   0.0000000e+00  -9.9017918e-01  -2.8124177e+00   2.3637372e+01
   1.8394896e+01  -2.4027524e+01   0.0000000e+00   1.7151183e+00   8.9973078e+00   2.6746934e+01
   1.8359743e+01  -2.4151643e+01   0.0000000e+00  -6.1049978e+00   1.3477463e+01   2.5658069e+01
   1.8329057e+01  -2.4276751e+01   0.0000000e+00   5.3613263e+00   2.7872976e+01   3.5960295e+01
   1.8302882e+01  -2.4402714e+01   0.0000000e+00   1.1194402e+01   3.8537450e+01   1.4379108e+01
   1.8281261e+01  -2.4529395e+01   0.0000000e+00  -1.5956261e+00   3.1935765e+01   1.2959610e+01
   1.8264231e+01  -2.4656656e+01   0.0000000e+00   9.1729552e-01   1.4683962e+00   1.7002175e+01
   1.8251824e+01  -2.4784360e+01   0.0000000e+00   7.2664679e+00  -3.6155052e+01   3.0815983e+01
   1.8244067e+01  -2.4912367e+01   0.0000000e+00   2.6419311e+01  -4.4966417e+01   3.1878801e+01
   1.8240985e+01  -2.5040537e+01   0.0000000e+00   7.4767955e+00  -4.2308317e+01   2.4259758e+01
   1.8242593e+01  -2.5168729e+01   0.0000000e+00  -1.4024044e+01  -4.7669767e+01   4.3523901e+01
   1.8248907e+01  -2.5296802e+01   0.0000000e+00  -2.7326450e+01  -6.0458838e+01   6.7201872e+01
   1.8259933e+01  -2.5424615e+01   0.0000000e+00  -1.7505637e+01  -6.5044792e+01   1.0636913e+02
   1.8275674e+01  -2.5552025e+01   0.0000000e+00   6.3179644e+00  -5.5689321e+01   1.1685675e+02
   1.8296128e+01  -2.5678892e+01   0.0000000e+00   2.7092879e+01  -4.8241656e+01   1.3238430e+02
   1.8321288e+01  -2.5805073e+01   0.0000000e+00   5.8272372e+01  -5.7483310e+01   1.0821126e+02
   1.8351141e+01  -2.5930428e+01   0.0000000e+00   3.2582282e+01  -6.7208075e+01   7.8258811e+01
   1.8385667e+01  -2.6054815e+01   0.0000000e+00   3.3504414e+01  -5.8591425e+01   8.2651551e+01
   1.8424844e+01  -2.6178095e+01   0.0000000e+00   3.5123267e+01  -4.5707356e+01   5.0948372e+01
   1.8468642e+01  -2.6300127e+01   0.0000000e+00   4.4495454e+01  -4.9571244e+01   1.6794893e+01
   1.8517026e+01  -2.6420775e+01   0.0000000e+00   2.4203809e+01  -3.6848639e+01  -7.6069872e+01
   1.8569957e+01  -2.6539900e+01   0.0000000e+00  -7.2454549e+01   1.6494640e-01  -5.4466137e+01
   1.8627387e+01  -2.6657366e+01   0.0000000e+00  -3.2148534e+01   1.4623959e+01   3.0273128e+01
   1.8689266e+01  -2.6773038e+01   0.0000000e+00   2.6735413e+00   3.0679774e+01  -7.5132873e+00
   1.8755537e+01  -2.6886784e+01   0.0000000e+00  -3.7973366e+01   3.9808601e+01  -7.6064116e+00
   1.8826136e+01  -2.6998473e+01   0.0000000e+00  -5.7009141e+01   3.7229878e+01   3.4721300e+01
   1.8900996e+01  -2.7107974e+01   0.0000000e+00  -5.9839968e+01   7.9298048e+00   9.7426737e+01
   1.8980042e+01  -2.7215161e+01   0.0000000e+00  -2.8007952e+01  -1.9901671e+01   1.1160132e+02
   1.9063196e+01  -2.7319909e+01   0.0000000e+00  -7.7277715e+00  -1.7268859e+01   1.1207145e+02
   1.9150371e+01  -2.7422096e+01   0.0000000e+00   1.5036157e+01  -5.2627804e+01   1.0327284e+02
   1.9241478e+01  -2.7521601e+01   0.0000000e+00   6.5527185e+00  -5.9531663e+01   7.9868681e+01
   1.9336421e+01  -2.7618308e+01   0.0000000e+00   1.5568102e+01  -7.8326626e+01   8.7660983e+01
   1.9435097e+01  -2.7712102e+01   0.0000000e+00   1.3286345e+01  -8.0823591e+01   4.8004110e+01
   1.9537402e+01  -2.7802872e+01   0.0000000e+00   1.7485815e+01  -7.6216018e+01   5.0923382e+01
   1.9643223e+01  -2.7890511e+01   0.0000000e+00   1.6875772e+01  -1.2239446e+02  -3.7585306e+01
   1.9752443e+01  -2.7974914e+01   0.0000000e+00  -9.5897599e+01  -7.0888072e+01  -6.4873404e+01
   1.9864941e+01  -2.8055980e+01   0.0000000e+00  -9.2235172e+01  -6.6234061e+01   1.9509650e+01
   1.9980590e+01  -2.8133613e+01   0.0000000e+00  -6.9548244e+01  -4.4343257e+01  -4.9634674e+01
   2.0099259e+01  -2.8207718e+01   0.0000000e+00  -1.2668494e+02   4.9691211e+01  -1.1033077e+01
   2.0220812e+01  -2.8278208e+01   0.0000000e+00  -1.0132864e+02   4.8403345e+01   1.0222909e+02
   2.0345108e+01  -2.8344997e+01   0.0000000e+00  -2.8545497e+01  -1.3591911e+00   1.4068851e+02
   2.0472005e+01  -2.8408004e+01   0.0000000e+00   3.4122058e+01  -4.0075058e+01   1.2416495e+02
   2.0601352e+01  -2.8467152e+01   0.0000000e+00   4.8406618e+01  -1.3425133e+02   1.2482761e+02
   2.0732999e+01  -2.8522371e+01   0.0000000e+00   2.5885500e+01  -3.2775824e+02  -7.3098042e+01
   2.0866788e+01  -2.8573592e+01   0.0000000e+00  -4.8951236e+01  -1.9865466e+02  -3.4800732e+02
   2.1002562e+01  -2.8620753e+01   0.0000000e+00  -7.3131093e+01  -6.5670973e+01  -2.8058060e+02
   2.1140158e+01  -2.8663798e+01   0.0000000e+00  -1.7416612e+02  -7.0472431e+01  -3.4540012e+02
   2.1279410e+01  -2.8702672e+01   0.0000000e+00  -2.9319792e+02   1.1129695e+02  -1.8901318e+02
   2.1420151e+01  -2.8737329e+01   0.0000000e+00  -1.2914680e+02  -6.0168020e+01   2.1663117e+01
   2.1562211e+01  -2.8767726e+01   0.0000000e+00  -3.6270273e+01  -8.5687935e+01  -2.2378453e+02
   2.1705417e+01  -2.8793825e+01   0.0000000e+00  -2.6637039e+01   1.0422426e+02  -1.4702373e+02
   2.1849595e+01  -2.8815595e+01   0.0000000e+00   2.1302106e+01   5.4410441e+01  -3.2507098e+00
   2.1994569e+01  -2.8833009e+01   0.0000000e+00  -2.0738175e+01  -5.7883070e+01   8.7627377e+01
   2.2140162e+01  -2.8846046e+01   0.0000000e+00   1.2328886e+02  -3.7271888e+02  -7.2855109e+01
   2.2286196e+01  -2.8854688e+01   0.0000000e+00   3.0324741e+02  -2.3468557e+02  -5.6471452e+02
   2.2432492e+01  -2.8858927e+01   0.0000000e+00   1.7797610e+02   3.3153182e+02  -4.9313993e+02
   2.2578871e+01  -2.8858755e+01   0.0000000e+00   1.4807737e+02   6.8470527e+02   1.3075550e+02
   2.2725153e+01  -2.8854175e+01   0.0000000e+00   3.1663867e+02   3.7554666e+02   7.3599570e+02
   2.3482750e+01  -2.8890663e+01   0.0000000e+00  -1.5552970e+01  -7.9420307e+00   7.6246331e+01
   2.3625094e+01  -2.8859884e+01   0.0000000e+00  -4.0342116e+00  -4.3037303e+00   8.3531199e+01
   2.3766142e+01  -2.8824969e+01   0.0000000e+00  -9.1629068e+00   2.7322899e+01   4.4082021e+01
   2.3905735e+01  -2.8785956e+01   0.0000000e+00  -2.2361818e+01   1.5491003e+01   1.0280432e+02
   2.4043712e+01  -2.8742890e+01   0.0000000e+00  -3.6400917e+01  -3.5920021e+01   5.5676398e+01
   2.4179920e+01  -2.8695823e+01   0.0000000e+00  -2.4498362e+01  -1.6698010e+01   4.1663678e+01
   2.4314203e+01  -2.8644807e+01   0.0000000e+00  -5.9963938e+01  -4.1394718e+01   7.0509085e+00
   2.4446412e+01  -2.8589902e+01   0.0000000e+00  -6.6245562e+01   5.7186408e+01  -6.0940957e+01
   2.4576399e+01  -2.8531171e+01   0.0000000e+00  -5.7244093e+01   1.2943553e+02   3.5752652e+01
   2.4704021e+01  -2.8468680e+01   0.0000000e+00  -8.0610685e+01   9.1234261e+01   9.2530273e+01
   2.4829135e+01  -2.8402501e+01   0.0000000e+00  -6.9933186e+01   6.2868059e+01   9.4818869e+01
   2.4951607e+01  -2.8332709e+01   0.0000000e+00  -4.8634706e+01   2.4380933e+01   8.6592089e+01
   2.5071302e+01  -2.8259385e+01   0.0000000e+00  -3.4284155e+01   2.0129654e+01   7.2931491e+01
   2.5188091e+01  -2.8182611e+01   0.0000000e+00  -2.5700628e+01   1.4050389e+01   8.2387923e+01
   2.5301850e+01  -2.8102474e+01   0.0000000e+00   3.1752041e+01  -1.2840740e+01   8.9295446e+01
   2.5412458e+01  -2.8019064e+01   0.0000000e+00   7.6730738e+01  -4.0010593e+01   1.0464199e+02
   2.5519799e+01  -2.7932477e+01   0.0000000e+00   5.8141739e+01  -2.3228263e+01   1.0355496e+02
   2.5623761e+01  -2.7842807e+01   0.0000000e+00   9.6021978e+00   8.1235893e+00   1.5779247e+02
   2.5724237e+01  -2.7750157e+01   0.0000000e+00  -1.1687703e+02  -3.8752277e-02   1.6224778e+02
   2.5821125e+01  -2.7654630e+01   0.0000000e+00  -1.8893120e+02   1.6461220e+01   5.0518677e+01
   2.5914327e+01  -2.7556331e+01   0.0000000e+00  -1.8582815e+02   2.4473619e+01  -3.3023316e+01
   2.6003751e+01  -2.7455370e+01   0.0000000e+00  -2.0553169e+02   3.0320876e+01  -1.3208506e+02
   2.6089309e+01  -2.7351859e+01   0.0000000e+00  -1.7177233e+02   4.4299263e+01  -2.4662097e+02
   2.6170918e+01  -2.7245912e+01   0.0000000e+00  -4.7853624e+01   6.5566985e+01  -3.0585339e+02
   2.6248502e+01  -2.7137645e+01   0.0000000e+00   1.0852684e+02   1.2369832e+02  -1.9770651e+02
   2.6321987e+01  -2.7027176e+01   0.0000000e+00   1.2683629e+02   1.0815961e+02   3.2333181e+01
   2.6391306e+01  -2.6914627e+01   0.0000000e+00   2.9643288e+01   3.7088028e+01   1.1036153e+02
   2.6456397e+01  -2.6800120e+01   0.0000000e+00  -2.7708577e+00  -4.9260622e-01   7.5073084e+01
   2.6517203e+01  -2.6683778e+01   0.0000000e+00   5.5849293e+00  -8.0616720e+00   6.9244549e+01
   2.6573672e+01  -2.6565729e+01   0.0000000e+00  -1.7833433e+00   1.0562014e+01   1.0561533e+02
   2.6625757e+01  -2.6446098e+01   0.0000000e+00  -5.1597676e+01  -2.1686210e+00   1.4078574e+02
   2.6673417e+01  -2.6325015e+01   0.0000000e+00  -8.3686670e+01  -3.2913547e+01   9.3807455e+01
   2.6716615e+01  -2.6202608e+01   0.0000000e+00  -8.3654536e+01  -2.5314615e+01   4.9720368e+01
   2.6755319e+01  -2.6079009e+01   0.0000000e+00  -1.4553654e+02  -3.6051535e+00  -1.1148621e+01
   2.6789504e+01  -2.5954348e+01   0.0000000e+00  -1.1254235e+02   1.4788338e+01  -1.4390732e+02
   2.6819147e+01  -2.5828758e+01   0.0000000e+00   1.8877284e+01   4.8040895e+01  -1.2327268e+02
   2.6844232e+01  -2.5702371e+01   0.0000000e+00  -1.2848464e+01   8.7342238e+01  -3.9992104e+01
   2.6864748e+01  -2.5575320e+01   0.0000000e+00  -2.5351745e+01   8.2790285e+01  -1.0349782e+02
   2.6880688e+01  -2.5447738e+01   0.0000000e+00   4.3883696e+01   5.6956777e+01  -4.3323518e+01
   2.6892049e+01  -2.5319759e+01   0.0000000e+00  -9.3222734e+01   2.0440608e+01   1.8229231e+01
   2.6898836e+01  -2.5191515e+01   0.0000000e+00  -1.3108921e+02  -9.4466675e+01  -1.7716045e+02
   2.6901055e+01  -2.5063141e+01   0.0000000e+00   8.2293671e+01  -1.5522091e+02  -1.9997147e+02
   2.6898718e+01  -2.4934768e+01   0.0000000e+00   1.2644264e+02  -7.5761079e+01  -2.3632369e+01
   2.6891843e+01  -2.4806529e+01   0.0000000e+00   5.8649932e+01  -5.4606744e+01   1.3499441e+01
   2.6880449e+01  -2.4678557e+01   0.0000000e+00   6.2537256e+01  -8.4399320e+01   3.9171405e+01
   2.6864563e+01  -2.4550981e+01   0.0000000e+00   1.3511241e+01  -7.3299206e+01   9.3598720e+01
   2.6844215e+01  -2.4423934e+01   0.0000000e+00  -6.4779837e+01  -1.0073663e+02   6.1187191e+01
   2.6819438e+01  -2.4297543e+01   0.0000000e+00  -7.4930364e+01  -1.3557820e+02   2.1921988e+00
   2.6790271e+01  -2.4171938e+01   0.0000000e+00  -4.6549129e+01  -1.1946345e+02  -9.6344437e+00
   2.6756755e+01  -2.4047245e+01   0.0000000e+00  -3.6516660e+01  -6.2693322e+01   2.7647677e+01
   2.6718937e+01  -2.3923592e+01   0.0000000e+00  -6.7609848e+01  -6.3766905e+00   3.6124347e+01
   2.6676867e+01  -2.3801102e+01   0.0000000e+00  -6.5106113e+01   1.8091614e+00  -4.3329805e-02
   2.6630600e+01  -2.3679898e+01   0.0000000e+00  -8.1325641e+01   1.6837699e+01   4.2848941e+01
   2.6580191e+01  -2.3560103e+01   0.0000000e+00  -2.4855411e+02   7.5565918e+01  -9.4454466e+01
   2.6525703e+01  -2.3441835e+01   0.0000000e+00  -1.3595300e+02   2.9034665e+01  -4.6955424e+02
   2.6467201e+01  -2.3325214e+01   0.0000000e+00   2.2611281e+02  -9.9455171e+01  -3.1981857e+02
   2.6404752e+01  -2.3210354e+01   0.0000000e+00   1.1807148e+02  -2.9079762e+01   6.1864311e+01
   2.6338428e+01  -2.3097370e+01   0.0000000e+00  -6.1844756e+01   7.0154899e+01  -9.6875368e+01
   2.6268304e+01  -2.2986375e+01   0.0000000e+00   9.3700360e+01   1.2991595e+01  -1.8673408e+02
   2.6194458e+01  -2.2877477e+01   0.0000000e+00   1.5003995e+02   2.5715675e+01  -1.4160482e+01
   2.6116972e+01  -2.2770784e+01   0.0000000e+00   1.1630175e+02   4.1088149e+01   4.8507948e+01
   2.6035928e+01  -2.2666402e+01   0.0000000e+00   8.0916210e+01   3.4883964e+01   9.2918953e+01
   2.5951415e+01  -2.2564433e+01   0.0000000e+00   5.5884678e+01   6.6775028e+01   7.9255879e+01
   2.5863521e+01  -2.2464976e+01   0.0000000e+00   6.9979390e+01   2.8727519e+01   9.4780703e+01
   2.5772340e+01  -2.2368131e+01   0.0000000e+00   1.2980769e+01   2.0307832e+01   1.4440792e+02
   2.5677967e+01  -2.2273990e+01   0.0000000e+00  -1.8418221e+01   4.0613495e+01   9.1166023e+01
   2.5580500e+01  -2.2182646e+01   0.0000000e+00  -1.7465136e+00   2.7953790e+01   5.5035081e+01
   2.5480038e+01  -2.2094189e+01   0.0000000e+00  -1.2054643e+01   1.5557194e+01   3.4467475e+01
   2.5376684e+01  -2.2008704e+01   0.0000000e+00  -6.8525677e+00  -1.3696562e+01   1.9054086e+01
   2.5270544e+01  -2.1926274e+01   0.0000000e+00   9.1024939e-01  -1.3148949e+01   4.1645511e+01
   2.5161723e+01  -2.1846979e+01   0.0000000e+00  -2.8489815e+01   2.8252831e+00   2.2604655e+01
   2.5050331e+01  -2.1770896e+01   0.0000000e+00  -2.1052754e+01  -3.1001564e+01  -2.3700497e+01
   2.4936480e+01  -2.1698100e+01   0.0000000e+00   3.3840813e+01  -5.9112460e+01   1.8456248e+01
   2.4820282e+01  -2.1628659e+01   0.0000000e+00   3.0465484e+01  -1.4904862e+01   5.9609087e+01
   2.4701851e+01  -2.1562642e+01   0.0000000e+00   1.1968153e+01  -1.8940997e+01   2.3019721e+01
   2.4581305e+01  -2.1500112e+01   0.0000000e+00  -1.4085547e+01  -4.3981869e+01   3.9866549e+01
   2.4458761e+01  -2.1441130e+01   0.0000000e+00  -1.1545223e+01   1.2753484e+01   4.0927704e+00
   2.4334339e+01  -2.1385751e+01   0.0000000e+00   5.0051091e+01  -2.0119619e+01  -1.7368923e+01
   2.4208160e+01  -2.1334030e+01   0.0000000e+00  -6.4603121e+00  -3.9520409e+01   8.7782528e+01
   2.4080347e+01  -2.1286017e+01   0.0000000e+00  -5.9900163e+01   2.4721104e+01   6.4208039e+01
   2.3951023e+01  -2.1241756e+01   0.0000000e+00   1.6032964e+01   1.8997822e+01   2.1083360e+01
   2.3820312e+01  -2.1201292e+01   0.0000000e+00   7.4655548e+01   4.8485432e+01   4.0922747e+01
   2.3688341e+01  -2.1164662e+01   0.0000000e+00   8.8994137e+01   6.4692548e+01  -1.2974171e+01
   2.3555235e+01  -2.1131903e+01   0.0000000e+00   6.4233673e+01  -1.1150394e+00  -3.7026942e+01
   2.3421124e+01  -2.1103045e+01   0.0000000e+00   4.9113229e+01  -5.2346434e+01   2.4022171e+00
   2.3286135e+01  -2.1078115e+01   0.0000000e+00   4.5031852e+01  -4.0849055e+01   7.6434080e+01
   2.3150396e+01  -2.1057139e+01   0.0000000e+00   8.4258490e+00   3.0913069e+01   8.3912048e+01
   2.3014039e+01  -2.1040136e+01   0.0000000e+00   1.0934200e+01   4.0750442e+01   2.1189086e+00
   2.2877192e+01  -2.1027122e+01   0.0000000e+00   4.5847806e+01  -1.1336028e+01  -1.5965541e+01
   2.2739985e+01  -2.1018110e+01   0.0000000e+00   3.9239499e+01  -2.9979539e+01   4.1926127e+01
   2.2602551e+01  -2.1013108e+01   0.0000000e+00  -3.4032342e+01   2.7708824e+01   6.6724648e+01
   2.2465019e+01  -2.1012121e+01   0.0000000e+00  -1.0508926e+02   8.5249694e+01  -3.9654879e+01
   2.2327520e+01  -2.1015150e+01   0.0000000e+00  -8.8404836e+01   3.3217960e+01  -1.4933451e+02
   2.2190185e+01  -2.1022193e+01   0.0000000e+00  -3.1036574e+01  -1.5298712e+01  -1.5093565e+02
   2.2053146e+01  -2.1033242e+01   0.0000000e+00  -1.1438722e+01  -2.7224562e+01  -1.3923800e+02
   2.1916531e+01  -2.1048287e+01   0.0000000e+00  -2.5396168e+01  -4.7697975e+01  -1.1578543e+02
   2.1780472e+01  -2.1067314e+01   0.0000000e+00  -4.3431284e+01  -4.5508050e+01  -9.0001536e+01
   2.1645099e+01  -2.1090304e+01   0.0000000e+00  -6.3929866e+01  -5.1877191e+01  -7.0354618e+01
   2.1510540e+01  -2.1117235e+01   0.0000000e+00  -7.8016850e+01  -5.3959213e+01  -2.6692138e+01
   2.1376925e+01  -2.1148081e+01   0.0000000e+00  -7.7464718e+01  -4.5371970e+01  -8.8288437e+00
   2.1244380e+01  -2.1182813e+01   0.0000000e+00  -6.9971636e+01  -7.6094542e+01   2.1796786e-01
   2.1113034e+01  -2.1221398e+01   0.0000000e+00  -5.7479271e+01  -8.3309101e+01   7.3180294e+01
   2.0983013e+01  -2.1263798e+01   0.0000000e+00  -4.1485327e+01   1.2176559e+01   9.9995950e+01
   2.0854442e+01  -2.1309973e+01   0.0000000e+00  -5.8082729e+01   7.0952701e+01   3.2122385e+00
   2.0727444e+01  -2.1359879e+01   0.0000000e+00  -1.0109668e+02   3.7686748e+01  -3.9713082e+01
   2.0602144e+01  -2.1413467e+01   0.0000000e+00  -8.3915999e+01   1.7424081e+01  -2.0531620e+01
   2.0478663e+01  -2.1470685e+01   0.0000000e+00  -3.2164188e+01  -1.3453438e+01  -1.1666740e+01
   2.0357120e+01  -2.1531480e+01   0.0000000e+00  -9.4768762e+00  -1.8462515e+01   1.3984273e+01
   2.0237635e+01  -2.1595791e+01   0.0000000e+00  -8.1058803e+00  -1.4004571e+00   1.3825758e+01
   2.0120326e+01  -2.1663558e+01   0.0000000e+00  -8.4411894e+00   3.2351946e+00   2.8115133e+01
   2.0005307e+01  -2.1734714e+01   0.0000000e+00   8.0075781e+00   3.5140541e+01   9.5416807e+00
   1.9892693e+01  -2.1809191e+01   0.0000000e+00  -5.1474135e+00   2.8373941e+01  -4.7235627e+01
   1.9782595e+01  -2.1886917e+01   0.0000000e+00  -2.4969676e+01   1.7307004e+01  -3.8360296e+01
   1.9675124e+01  -2.1967816e+01   0.0000000e+00  -2.1220724e+01   2.5110687e+01  -3.3516539e+01
   1.9570388e+01  -2.2051811e+01   0.0000000e+00  -2.8338858e+01   1.5063682e+01  -3.0099969e+01
   1.9468492e+01  -2.2138818e+01   0.0000000e+00  -2.8104718e+01   1.5065603e+01  -2.5189281e+01
   1.9369541e+01  -2.2228755e+01   0.0000000e+00  -3.6974277e+01   8.1700063e+00  -2.8217767e+01
   1.9273635e+01  -2.2321533e+01   0.0000000e+00  -4.4824960e+01   1.7490691e+01  -1.1730667e+01
   1.9180874e+01  -2.2417061e+01   0.0000000e+00  -4.8800479e+01   2.7486144e+01  -4.9548667e+00
   1.9091353e+01  -2.2515247e+01   0.0000000e+00  -4.8181639e+01   3.0715467e+01   2.0617744e+01
   1.9005168e+01  -2.2615993e+01   0.0000000e+00  -3.4175941e+01   4.4001491e+01   2.6682753e+01
   1.8922409e+01  -2.2719203e+01   0.0000000e+00  -4.0893900e+01   4.4048211e+01   3.2858080e+01
   1.8843164e+01  -2.2824773e+01   0.0000000e+00  -1.9025745e+01   5.8492892e+01   4.6039015e+01
   1.8767518e+01  -2.2932601e+01   0.0000000e+00  -5.4850548e+00   5.8370207e+01   1.1028831e+01
   1.8695556e+01  -2.3042579e+01   0.0000000e+00  -2.0375491e+01   4.1372924e+01   1.0576193e+01
   1.8627356e+01  -2.3154600e+01   0.0000000e+00  -8.4233720e+00   3.5421455e+01   2.0186822e+01
   1.8562994e+01  -2.3268552e+01   0.0000000e+00  -4.6897984e+00   2.2803425e+01   2.1432642e+01
   1.8502543e+01  -2.3384322e+01   0.0000000e+00   1.0793238e+01   1.2556926e+01   3.0662405e+01
   1.8446075e+01  -2.3501796e+01   0.0000000e+00   1.5887178e+01  -3.5530045e+00   1.9844791e+01
   1.8393654e+01  -2.3620856e+01   0.0000000e+00   8.7476778e+00  -1.5268010e+01   3.1428035e+01
   1.8345344e+01  -2.3741382e+01   0.0000000e+00   2.0747626e+01  -8.6119988e+00   3.2831918e+01
   1.8301205e+01  -2.3863256e+01   0.0000000e+00   1.2216938e+01   3.8489251e+00   1.9520856e+01
   1.8261291e+01  -2.3986353e+01   0.0000000e+00   2.8834903e+00   4.9557142e+00   2.0853925e+01
   1.8225656e+01  -2.4110551e+01   0.0000000e+00   2.9878303e+00   2.6326108e+00   2.7564880e+01
   1.8194347e+01  -2.4235723e+01   0.0000000e+00   1.5565278e+01   1.3041609e+01   2.7377985e+01
   1.8167407e+01  -2.4361744e+01   0.0000000e+00   1.9890372e+01   1.6188678e+01   6.7084969e-01
   1.8144879e+01  -2.4488485e+01   0.0000000e+00  -8.2065964e+00   9.9183627e+00  -1.2600748e+01
   1.8126796e+01  -2.4615817e+01   0.0000000e+00  -3.7035122e+01  -1.8209581e+01   1.7917994e+01
   1.8113192e+01  -2.4743611e+01   0.0000000e+00  -2.2664513e+01  -4.9418826e+01   7.8551825e+01
   1.8104094e+01  -2.4871735e+01   0.0000000e+00   3.1070269e+01  -4.6692074e+01   8.5529778e+01
   1.8099525e+01  -2.5000059e+01   0.0000000e+00   2.8216750e+01  -3.0341279e+01   3.9455316e+01
   1.8099504e+01  -2.5128449e+01   0.0000000e+00  -1.5885777e+01  -2.4811027e+01   4.2341100e+01
   1.8104045e+01  -2.5256773e+01   0.0000000e+00  -3.3978104e+01  -3.4792224e+01   8.4847888e+01
   1.8113158e+01  -2.5384899e+01   0.0000000e+00  -1.7122577e+01  -3.1634479e+01   1.2834504e+02
   1.8126848e+01  -2.5512693e+01   0.0000000e+00   1.4770996e+01  -2.2238585e+01   1.3970394e+02
   1.8145116e+01  -2.5640021e+01   0.0000000e+00   3.8018437e+01  -1.1013284e+01   1.3797865e+02
   1.8167958e+01  -2.5766751e+01   0.0000000e+00   6.4697226e+01   1.0334578e+01   1.1913770e+02
   1.8195363e+01  -2.5892749e+01   0.0000000e+00   5.2716677e+01   1.1891314e+01   9.6013475e+01
   1.8227318e+01  -2.6017883e+01   0.0000000e+00   6.1731487e+01   1.2883660e+01   8.8782421e+01
   1.8263805e+01  -2.6142020e+01   0.0000000e+00   5.9616764e+01   1.8357760e+01   3.2419056e+01
   1.8304799e+01  -2.6265030e+01   0.0000000e+00   1.8889592e+01  -6.7258792e+00   2.6522786e+01
   1.8350270e+01  -2.6386779e+01   0.0000000e+00   3.7286361e+01  -4.7500199e+01   7.2891933e-01
   1.8400186e+01  -2.6507140e+01   0.0000000e+00  -2.5940429e+01  -4.3945129e+01  -5.1981795e+01
   1.8454507e+01  -2.6625982e+01   0.0000000e+00  -4.4507180e+01  -1.4944735e+01   1.6401452e+01
   1.8513188e+01  -2.6743179e+01   0.0000000e+00   2.6214764e+01   7.5103449e+00  -1.5831498e+01
   1.8576181e+01  -2.6858603e+01   0.0000000e+00  -3.5238448e+01   2.7907557e+01  -6.5780133e+01
   1.8643430e+01  -2.6972130e+01   0.0000000e+00  -7.7594195e+01   8.1482316e+00  -1.8327416e+01
   1.8714876e+01  -2.7083636e+01   0.0000000e+00  -7.9704248e+01   7.2007465e+00   1.1789845e+01
   1.8790455e+01  -2.7192999e+01   0.0000000e+00  -6.1344849e+01   8.9726075e+00   8.0182994e+01
   1.8870096e+01  -2.7300101e+01   0.0000000e+00  -1.6828332e+01  -2.0116507e+01   8.5699057e+01
   1.8953724e+01  -2.7404824e+01   0.0000000e+00  -1.8726449e+01  -2.4056535e+01   8.3747924e+01
   1.9041259e+01  -2.7507052e+01   0.0000000e+00   2.1253997e+00  -4.7782199e+01   1.0398527e+02
   1.9132616e+01  -2.7606672e+01   0.0000000e+00   8.8578855e+00  -5.6877062e+01   9.0350225e+01
   1.9227705e+01  -2.7703575e+01   0.0000000e+00   3.1753296e+01  -6.3759739e+01   9.4079481e+01
   1.9326430e+01  -2.7797652e+01   0.0000000e+00   4.9615630e+01  -5.8361474e+01   4.7741966e+01
   1.9428692e+01  -2.7888798e+01   0.0000000e+00   2.4902391e+01  -3.8994090e+01   4.3567335e+01
   1.9534387e+01  -2.7976912e+01   0.0000000e+00   7.5283318e+00  -7.1059109e+01   3.5874048e+01
   1.9643403e+01  -2.8061895e+01   0.0000000e+00  -2.7431286e+01  -3.1323057e+01   3.1922757e+01
   1.9755629e+01  -2.8143652e+01   0.0000000e+00  -2.7009124e+00  -1.2885900e+01   7.2490993e+01
   1.9870945e+01  -2.8222089e+01   0.0000000e+00  -1.5924070e+01  -2.1463311e+01  -2.3941298e+00
   1.9989228e+01  -2.8297119e+01   0.0000000e+00  -9.2977095e+01   4.8389518e+01   1.0317812e+00
   2.0110352e+01  -2.8368657e+01   0.0000000e+00  -8.4300490e+01   5.3065167e+01   1.0845690e+02
   2.0234185e+01  -2.8436620e+01   0.0000000e+00  -1.8809024e+01  -2.5760934e+00   1.5645506e+02
   2.0360592e+01  -2.8500932e+01   0.0000000e+00   3.6776783e+01  -5.0356380e+01   1.1200219e+02
   2.0489434e+01  -2.8561520e+01   0.0000000e+00   2.8490849e+01  -4.5601447e+01   8.1798785e+01
   2.0620570e+01  -2.8618313e+01   0.0000000e+00   2.9766050e+00  -1.5052029e+02   1.1102879e+02
   2.0753853e+01  -2.8671247e+01   0.0000000e+00  -7.3235701e+01  -2.6335635e+02  -6.0580064e+01
   2.0889134e+01  -2.8720262e+01   0.0000000e+00  -1.7079436e+02  -1.4304781e+02  -2.0448996e+02
   2.1026261e+01  -2.8765300e+01   0.0000000e+00  -2.5841808e+02  -4.2218132e+01  -1.7644077e+02
   2.1165080e+01  -2.8806309e+01   0.0000000e+00  -3.3943695e+02   2.7820648e+01  -3.5090188e+01
   2.1305433e+01  -2.8843244e+01   0.0000000e+00  -1.9033368e+02  -6.4897330e+01   1.2538497e+02
   2.1447160e+01  -2.8876060e+01   0.0000000e+00  -8.9650695e+01  -1.7462106e+02  -6.3072291e+01
   2.1590100e+01  -2.8904720e+01   0.0000000e+00  -1.5253242e+02  -4.7619212e+01  -1.6283008e+02
   2.1734090e+01  -2.8929190e+01   0.0000000e+00  -5.9111711e+01  -1.6764882e+01  -1.3749783e+02
   2.1878962e+01  -2.8949443e+01   0.0000000e+00  -9.9279837e+00   8.5787292e+01  -6.2886761e+01
   2.2024552e+01  -2.8965454e+01   0.0000000e+00  -3.8548702e+01  -1.5639704e+02   1.9165665e+02
   2.2170691e+01  -2.8977206e+01   0.0000000e+00  -1.1257124e+01  -5.9217502e+02  -3.0251490e+02
   2.2317210e+01  -2.8984684e+01   0.0000000e+00   9.2714021e+01  -1.7830058e+02  -8.6509358e+02
   2.2463940e+01  -2.8987880e+01   0.0000000e+00   3.3854948e+02   3.5650376e+02  -5.7391760e+02
   2.2610713e+01  -2.8986789e+01   0.0000000e+00   5.4629195e+02   4.9925660e+02  -1.8877373e+02
   2.2757357e+01  -2.8981415e+01   0.0000000e+00   4.7137088e+02   3.7696694e+02   1.0624095e+02
   2.2903704e+01  -2.8971761e+01   0.0000000e+00   1.8977409e+02   1.5453594e+02   1.6948996e+02
   2.3049584e+01  -2.8957841e+01   0.0000000e+00   9.7154568e+01   2.2872867e+02   2.5359989e+02
   2.3194830e+01  -2.8939670e+01   0.0000000e+00   1.2114170e+02   6.3841773e+01   4.5052857e+02
   2.3339274e+01  -2.8917268e+01   0.0000000e+00   2.0648018e+01  -1.3155505e+02   2.2383274e+02
   2.4096253e+01  -2.8862791e+01   0.0000000e+00  -3.5446461e+01  -3.3023754e+01   5.0297245e+01
   2.4232789e+01  -2.8815636e+01   0.0000000e+00  -3.3647441e+01  -1.9374019e+01   2.0625422e+01
   2.4367451e+01  -2.8764641e+01   0.0000000e+00  -3.1883705e+01  -1.7721040e+01  -1.7300166e+01
   2.4500096e+01  -2.8709861e+01   0.0000000e+00  -2.8116630e+01   7.1913841e+01  -2.2839466e+01
   2.4630585e+01  -2.8651355e+01   0.0000000e+00  -1.8042994e+01   1.0680816e+02   7.5234047e+01
   2.4758781e+01  -2.8589188e+01   0.0000000e+00  -2.7450333e+01   6.0960830e+01   1.2998801e+02
   2.4884551e+01  -2.8523425e+01   0.0000000e+00  -4.2163176e+01   2.3073515e+01   1.3789053e+02
   2.5007765e+01  -2.8454138e+01   0.0000000e+00  -3.8351747e+01  -8.8723291e+00   1.0768783e+02
   2.5128297e+01  -2.8381402e+01   0.0000000e+00  -2.5913772e+01   9.7157983e+00   9.5180533e+01
   2.5246025e+01  -2.8305293e+01   0.0000000e+00  -2.7829488e+01  -3.6640137e+01   1.2102858e+02
   2.5360828e+01  -2.8225895e+01   0.0000000e+00   1.7929227e+01  -1.1786237e+02   4.1631632e+01
   2.5472593e+01  -2.8143290e+01   0.0000000e+00   9.9193603e+01  -7.2017742e+01  -1.8987162e+01
   2.5581209e+01  -2.8057568e+01   0.0000000e+00   1.0279260e+02  -4.6828723e+00   4.6028514e+01
   2.5686569e+01  -2.7968819e+01   0.0000000e+00   8.0543467e+01   1.1988684e+00   1.1550638e+02
   2.5788570e+01  -2.7877136e+01   0.0000000e+00   4.3924035e+01  -4.9405436e+00   1.8168249e+02
   2.5887114e+01  -2.7782618e+01   0.0000000e+00  -6.1884895e+01  -1.2539027e+01   2.0472627e+02
   2.5982109e+01  -2.7685362e+01   0.0000000e+00  -1.3114936e+02  -1.7708848e+00   1.3339780e+02
   2.6073464e+01  -2.7585471e+01   0.0000000e+00  -1.5309146e+02   5.5486140e+01   7.9948300e+01
   2.6161095e+01  -2.7483050e+01   0.0000000e+00  -2.1465685e+02   9.5084027e+01   4.2584571e+01
   2.6244923e+01  -2.7378205e+01   0.0000000e+00  -2.2035485e+02   1.0011241e+02  -9.0162797e+01
   2.6324871e+01  -2.7271044e+01   0.0000000e+00  -8.1582020e+01   1.3879244e+02  -1.7777648e+02
   2.6400870e+01  -2.7161679e+01   0.0000000e+00   6.1651059e+01   1.2770882e+02  -7.4828315e+01
   2.6472853e+01  -2.7050223e+01   0.0000000e+00   7.8835381e+01   4.1352285e+01   5.5492347e+01
   2.6540758e+01  -2.6936789e+01   0.0000000e+00   1.9468540e+01  -3.9911154e+00   8.2800327e+01
   2.6604530e+01  -2.6821495e+01   0.0000000e+00  -1.1997526e+01  -1.7241118e+01   4.5763073e+01
   2.6664117e+01  -2.6704458e+01   0.0000000e+00   1.6752709e+01  -2.1092927e+01   4.0539677e+01
   2.6719472e+01  -2.6585797e+01   0.0000000e+00   6.8745262e+00  -3.9758738e+01   1.0200744e+02
   2.6770551e+01  -2.6465632e+01   0.0000000e+00  -5.8332008e+01  -9.2947957e+01   8.3215810e+01
   2.6817318e+01  -2.6344085e+01   0.0000000e+00  -4.6638756e+01  -8.2733512e+01   2.3622211e+00
   2.6859740e+01  -2.6221278e+01   0.0000000e+00  -2.8031788e+01  -1.7352533e+01   3.6524805e+01
   2.6897788e+01  -2.6097334e+01   0.0000000e+00  -1.1849636e+02   1.9402293e+01   3.6145231e+01
   2.6931439e+01  -2.5972378e+01   0.0000000e+00  -1.1650435e+02   5.0087933e+01  -1.1173647e+02
   2.6960673e+01  -2.5846533e+01   0.0000000e+00   2.9304778e+01   6.8471662e+01  -1.1341030e+02
   2.6985477e+01  -2.5719925e+01   0.0000000e+00   2.5084149e+01   7.1417602e+01   1.8868557e+01
   2.7005839e+01  -2.5592680e+01   0.0000000e+00  -3.8177338e+01   9.4900364e+01  -1.4941611e+01
   2.7021754e+01  -2.5464922e+01   0.0000000e+00   1.5172869e+01   8.9103288e+01   2.5216610e+00
   2.7033221e+01  -2.5336777e+01   0.0000000e+00  -1.2321023e+02   4.9683853e+01   8.0011311e+01
   2.7040243e+01  -2.5208372e+01   0.0000000e+00  -2.5408798e+02   9.7396848e+00  -1.9413774e+02
   2.7042827e+01  -2.5079831e+01   0.0000000e+00   2.9588011e+01  -5.8246412e+01  -3.7631135e+02
   2.7040984e+01  -2.4951279e+01   0.0000000e+00   2.0800543e+02  -7.4576186e+01  -9.2729556e+01
   2.7034731e+01  -2.4822841e+01   0.0000000e+00   5.8477964e+01  -3.0853058e+01   4.5487810e+01
   2.7024088e+01  -2.4694643e+01   0.0000000e+00   3.6836601e+01  -4.9012360e+01  -1.6301262e+01
   2.7009076e+01  -2.4566806e+01   0.0000000e+00   3.9213208e+01  -6.9197697e+01   7.1113033e+01
   2.6989726e+01  -2.4439455e+01   0.0000000e+00  -8.7883895e+01  -6.1867795e+01   5.7139813e+01
   2.6966067e+01  -2.4312712e+01   0.0000000e+00  -9.1141023e+01  -8.7985210e+01  -8.1250031e+01
   2.6938135e+01  -2.4186697e+01   0.0000000e+00  -8.1162994e+00  -8.1714512e+01  -9.1219712e+01
   2.6905970e+01  -2.4061531e+01   0.0000000e+00   4.3427951e+00  -5.9366267e+01  -2.5411646e+01
   2.6869613e+01  -2.3937333e+01   0.0000000e+00  -3.7825300e+01  -5.6398820e+01   2.8525527e+01
   2.6829112e+01  -2.3814220e+01   0.0000000e+00  -8.0735284e+01  -3.6203461e+01   1.3783402e+01
   2.6784515e+01  -2.3692310e+01   0.0000000e+00  -6.8973325e+01  -4.3892808e+01  -1.3851420e+01
   2.6735876e+01  -2.3571717e+01   0.0000000e+00  -9.7148319e+01   3.2313871e+01  -2.0953998e+01
   2.6683251e+01  -2.3452554e+01   0.0000000e+00  -8.6450951e+01   2.2543096e+02  -2.0765535e+02
   2.6626700e+01  -2.3334934e+01   0.0000000e+00   1.3424265e+02   1.9013829e+02  -3.1850033e+02
   2.6566286e+01  -2.3218967e+01   0.0000000e+00   2.0358642e+02  -7.4544361e+00  -6.6628259e+01
   2.6502074e+01  -2.3104761e+01   0.0000000e+00   3.5524504e+01   1.9143162e+01   6.1067384e+01
   2.6434133e+01  -2.2992422e+01   0.0000000e+00   4.8691765e+01   9.5925304e+01  -5.1546443e+01
   2.6362536e+01  -2.2882056e+01   0.0000000e+00   1.2498029e+02   3.0064726e+01  -1.6386931e+01
   2.6287357e+01  -2.2773764e+01   0.0000000e+00   7.7308633e+01  -1.2748173e+01   6.5885710e+01
   2.6208673e+01  -2.2667647e+01   0.0000000e+00   5.5895606e+01  -1.0741058e+01   8.2267792e+01
   2.6126565e+01  -2.2563803e+01   0.0000000e+00   3.0756619e+01  -1.9614105e+00   1.1805545e+02
   2.6041115e+01  -2.2462328e+01   0.0000000e+00  -2.0105102e+01  -7.6771354e-01   1.1920879e+02
   2.5952409e+01  -2.2363316e+01   0.0000000e+00  -4.8242990e+01  -3.3530907e+01   9.8860172e+01
   2.5860534e+01  -2.2266857e+01   0.0000000e+00  -6.5458805e+01  -3.9927801e+01   8.0609008e+01
   2.5765580e+01  -2.2173041e+01   0.0000000e+00  -4.9828573e+01  -2.4988659e+01   5.6443937e+01
   2.5667641e+01  -2.2081952e+01   0.0000000e+00  -3.4589455e+01  -1.1253331e+01   5.3745407e+01
   2.5566809e+01  -2.1993676e+01   0.0000000e+00  -3.7804656e+01   5.7629365e+00   1.9575346e+01
   2.5463183e+01  -2.1908291e+01   0.0000000e+00  -1.4578858e+01  -2.0760417e+01  -1.0255077e+01
   2.5356861e+01  -2.1825877e+01   0.0000000e+00  -8.7808453e+00  -2.7799904e+01   3.3611930e+01
   2.5247944e+01  -2.1746508e+01   0.0000000e+00  -4.2168026e+01   1.4116323e+01   8.9154244e+00
   2.5136533e+01  -2.1670257e+01   0.0000000e+00  -1.9117049e+01  -2.6687458e+01  -6.7515492e+01
   2.5022735e+01  -2.1597193e+01   0.0000000e+00   2.7683492e+01  -8.9494048e+01  -1.7627954e+00
   2.4906654e+01  -2.1527383e+01   0.0000000e+00   1.3451757e+00  -4.3670914e+01   7.4330684e+01
   2.4788398e+01  -2.1460889e+01   0.0000000e+00  -2.5619524e+01  -1.1263793e+01   2.6584667e+01
   2.4668077e+01  -2.1397772e+01   0.0000000e+00  -7.8113603e+00  -4.2373475e+01  -5.6241007e+00
   2.4545802e+01  -2.1338090e+01   0.0000000e+00   3.6074808e+01  -3.5630993e+01   2.0234328e+01
   2.4421685e+01  -2.1281896e+01   0.0000000e+00   5.4927350e+01   4.6325389e+00   4.9213357e+01
   2.4295839e+01  -2.1229241e+01   0.0000000e+00  -1.7427430e+01   3.1956614e+01   1.6757072e+01
   2.4168379e+01  -2.1180172e+01   0.0000000e+00  -5.4524193e+01   8.8198270e+00  -5.3911759e+01
   2.4039421e+01  -2.1134735e+01   0.0000000e+00  -1.3178192e+01  -4.0340853e+01  -2.2733089e+01
   2.3909081e+01  -2.1092970e+01   0.0000000e+00  -1.9943487e+00  -3.6279051e+01   7.4184446e+01
   2.3777478e+01  -2.1054914e+01   0.0000000e+00   8.5345082e+00   2.1119521e+01   1.0464331e+02
   2.3644730e+01  -2.1020603e+01   0.0000000e+00   2.2013254e+01   4.8462457e+01   3.3442018e+01
   2.3510958e+01  -2.0990066e+01   0.0000000e+00   2.5782183e+01  -2.1209513e+01  -1.4766956e+01
   2.3376280e+01  -2.0963332e+01   0.0000000e+00   1.8394066e+01  -5.2881269e+01   6.6995281e+01
   2.3240818e+01  -2.0940424e+01   0.0000000e+00  -2.9257632e+01   1.8100414e+01   8.8543267e+01
   2.3104694e+01  -2.0921363e+01   0.0000000e+00  -2.7870253e+01   2.1565983e+01   2.7750684e+01
   2.2968029e+01  -2.0906167e+01   0.0000000e+00   3.9582068e+00  -8.3625224e+00   5.2211618e+01
   2.2830946e+01  -2.0894848e+01   0.0000000e+00  -3.9283633e+01   1.9419749e+00   8.3051204e+01
   2.2693567e+01  -2.0887418e+01   0.0000000e+00  -8.1673082e+01   2.9283351e+01   6.1636997e+01
   2.2556015e+01  -2.0883882e+01   0.0000000e+00  -6.2074367e+01   8.3070454e+01  -4.4175920e+01
   2.2418413e+01  -2.0884244e+01   0.0000000e+00  -5.4091558e+00   3.1775574e+01  -1.7069470e+02
   2.2280884e+01  -2.0888504e+01   0.0000000e+00   5.9442368e+01  -6.2176953e+01  -1.2598168e+02
   2.2143550e+01  -2.0896658e+01   0.0000000e+00   7.6622996e+01  -3.5629290e+01  -4.8812350e+01
   2.2006536e+01  -2.0908698e+01   0.0000000e+00   5.0757531e+01  -1.9105237e+01  -6.3240726e+01
   2.1869962e+01  -2.0924614e+01   0.0000000e+00   2.8711129e+01  -3.8647730e+01  -5.6513111e+01
   2.1733952e+01  -2.0944391e+01   0.0000000e+00   8.4440247e+00  -3.0065276e+01  -4.8254574e+01
   2.1598626e+01  -2.0968012e+01   0.0000000e+00  -2.4710575e+01  -2.8638447e+01  -5.6474040e+01
   2.1464108e+01  -2.0995455e+01   0.0000000e+00  -7.2231940e+01  -2.4105904e+01  -6.1301687e+01
   2.1330516e+01  -2.1026695e+01   0.0000000e+00  -1.0160828e+02  -4.7687988e+01  -7.0028370e+01
   2.1197972e+01  -2.1061705e+01   0.0000000e+00  -8.8751598e+01  -9.7630601e+01  -2.6856769e+01
   2.1066595e+01  -2.1100453e+01   0.0000000e+00  -7.1585336e+01  -7.0509794e+01   5.3761667e+01
   2.0936503e+01  -2.1142903e+01   0.0000000e+00  -4.3864579e+01   2.4538900e+01   5.2655793e+01
   2.0807815e+01  -2.1189019e+01   0.0000000e+00  -6.2000274e+00   6.1669739e+01  -5.1173490e+01
   2.0680646e+01  -2.1238757e+01   0.0000000e+00  -1.8510697e+01   1.5103367e+01  -1.2646927e+02
   2.0555112e+01  -2.1292074e+01   0.0000000e+00  -4.4149273e+01  -3.7485088e+01  -9.7087734e+01
   2.0431329e+01  -2.1348920e+01   0.0000000e+00  -3.9240735e+01  -4.5825815e+01  -1.7868505e+01
   2.0309409e+01  -2.1409245e+01   0.0000000e+00  -2.8122436e+01  -1.0888695e+01   2.8113451e+01
   2.0189464e+01  -2.1472994e+01   0.0000000e+00  -1.8955325e+01   1.1315493e+01   1.8029368e+01
   2.0071604e+01  -2.1540108e+01   0.0000000e+00  -2.1361177e+01   1.5655880e+01   7.8092577e+00
   1.9955939e+01  -2.1610529e+01   0.0000000e+00  -1.0142315e+01   2.2030986e+01  -2.1498787e+00
   1.9842576e+01  -2.1684190e+01   0.0000000e+00   2.3604487e+01  -2.7489780e+00  -2.5333290e+01
   1.9731622e+01  -2.1761026e+01   0.0000000e+00   3.5407756e+01  -1.2278912e+01  -3.2867899e+01
   1.9623179e+01  -2.1840966e+01   0.0000000e+00   2.1389577e+01   6.5029347e+00  -4.5033998e+01
   1.9517350e+01  -2.1923938e+01   0.0000000e+00  -1.6896112e+00   8.8583830e+00  -5.1522870e+01
   1.9414236e+01  -2.2009866e+01   0.0000000e+00  -2.1031828e+01   1.0209616e+01  -3.9974489e+01
   1.9313935e+01  -2.2098672e+01   0.0000000e+00  -2.8433783e+01   1.7957092e+00  -2.4111935e+01
   1.9216543e+01  -2.2190274e+01   0.0000000e+00  -2.4463790e+01   3.4551568e+00  -3.7960194e+00
   1.9122155e+01  -2.2284588e+01   0.0000000e+00  -2.5132069e+01   1.8177083e+01  -3.0853165e+00
   1.9030862e+01  -2.2381528e+01   0.0000000e+00  -3.6235646e+01   2.0870722e+01   4.9995089e+00
   1.8942755e+01  -2.2481005e+01   0.0000000e+00  -3.2234609e+01   3.9626241e+01   1.7246539e+01
   1.8857919e+01  -2.2582927e+01   0.0000000e+00  -3.3904167e+01   4.8635016e+01   7.1185836e+00
   1.8776441e+01  -2.2687201e+01   0.0000000e+00  -3.7364599e+01   4.7121893e+01   1.6754424e+01
   1.8698403e+01  -2.2793729e+01   0.0000000e+00  -1.6174269e+01   5.1108287e+01   1.3624716e+01
   1.8623884e+01  -2.2902414e+01   0.0000000e+00  -1.1893275e+01   3.1644729e+01  -6.0971893e+00
   1.8552961e+01  -2.3013155e+01   0.0000000e+00  -1.5220387e+01   1.8648967e+01   2.9788241e+00
   1.8485708e+01  -2.3125849e+01   0.0000000e+00  -9.3085573e+00   1.5588883e+01   1.0409330e+01
   1.8422197e+01  -2.3240390e+01   0.0000000e+00  -7.9081256e+00   8.4715035e+00   2.1475097e+01
   1.8362495e+01  -2.3356673e+01   0.0000000e+00   1.9813202e+00   9.5425193e+00   3.1707290e+01
   1.8306669e+01  -2.3474588e+01   0.0000000e+00  -3.8361710e-01   1.4096504e+00   3.2593284e+01
   1.8254781e+01  -2.3594025e+01   0.0000000e+00   2.0717156e+00  -5.3688105e+00   5.3123870e+01
   1.8206889e+01  -2.3714872e+01   0.0000000e+00   2.6670345e+01   1.6230711e+00   4.8605177e+01
   1.8163049e+01  -2.3837014e+01   0.0000000e+00   2.0311539e+01   4.9854282e+00   1.9082715e+01
   1.8123314e+01  -2.3960337e+01   0.0000000e+00  -4.8240450e-01   3.1944722e+00   2.7244393e+01
   1.8087733e+01  -2.4084724e+01   0.0000000e+00   6.1466216e+00   6.5500972e+00   4.3526046e+01
   1.8056352e+01  -2.4210057e+01   0.0000000e+00   1.8111863e+01   1.1186732e+01   3.4291785e+01
   1.8029211e+01  -2.4336217e+01   0.0000000e+00   1.9120151e+01   6.6285334e+00   1.0900153e+01
   1.8006351e+01  -2.4463082e+01   0.0000000e+00  -1.0580572e+01  -4.7043050e+00  -1.2340520e+01
   1.7987804e+01  -2.4590533e+01   0.0000000e+00  -5.9092054e+01  -2.0681182e+01   2.7686898e+01
   1.7973603e+01  -2.4718446e+01   0.0000000e+00  -3.8244364e+01  -2.2207431e+01   1.1263066e+02
   1.7963774e+01  -2.4846698e+01   0.0000000e+00   3.2299570e+01  -7.7888212e+00   1.1755254e+02
   1.7958339e+01  -2.4975166e+01   0.0000000e+00   4.0706467e+01  -7.4832393e+00   5.6925066e+01
   1.7957318e+01  -2.5103725e+01   0.0000000e+00  -7.0163774e+00  -1.0295357e+01   3.8560923e+01
   1.7960726e+01  -2.5232251e+01   0.0000000e+00  -3.4359878e+01  -4.4136174e+00   8.6897882e+01
   1.7968574e+01  -2.5360618e+01   0.0000000e+00  -6.5963264e+00   6.0139513e+00   1.3305981e+02
   1.7980868e+01  -2.5488700e+01   0.0000000e+00   2.5196455e+01   2.4216105e+01   1.3961902e+02
   1.7997609e+01  -2.5616372e+01   0.0000000e+00   5.4723832e+01   3.8055817e+01   1.4308000e+02
   1.8018797e+01  -2.5743509e+01   0.0000000e+00   9.4999087e+01   5.3630251e+01   9.3202058e+01
   1.8044425e+01  -2.5869984e+01   0.0000000e+00   6.7668803e+01   7.0147710e+01   3.8426818e+01
   1.8074481e+01  -2.5995673e+01   0.0000000e+00   5.6353314e+01   5.5369864e+01   4.2899818e+01
   1.8108951e+01  -2.6120450e+01   0.0000000e+00   6.1836577e+01   3.0262451e+01  -1.1783358e+01
   1.8147814e+01  -2.6244192e+01   0.0000000e+00  -7.9518477e+00   1.9494055e+01  -1.3522338e+01
   1.8191046e+01  -2.6366774e+01   0.0000000e+00   3.2342932e+00  -1.3072136e+01   4.1175463e+01
   1.8238617e+01  -2.6488074e+01   0.0000000e+00   1.2486600e+01  -3.0475648e+01  -4.2236754e+00
   1.8290494e+01  -2.6607968e+01   0.0000000e+00  -2.8592306e+01  -1.0164468e+01   1.6459320e+01
   1.8346639e+01  -2.6726337e+01   0.0000000e+00   3.1776208e+01  -1.2773498e+01   5.4639348e+00
   1.8407007e+01  -2.6843059e+01   0.0000000e+00  -1.1632863e+01  -6.2326854e-01  -1.0421582e+02
   1.8471551e+01  -2.6958016e+01   0.0000000e+00  -1.2465565e+02   5.6835936e+00  -4.7485374e+01
   1.8540219e+01  -2.7071091e+01   0.0000000e+00  -1.0846718e+02  -3.5837783e+01   4.1435722e+01
   1.8612953e+01  -2.7182167e+01   0.0000000e+00  -7.8280103e+01  -3.2466673e+01   5.8095103e+01
   1.8689691e+01  -2.7291131e+01   0.0000000e+00  -5.3940547e+01  -1.8845990e+01   9.1878830e+01
   1.8770366e+01  -2.7397869e+01   0.0000000e+00  -3.6690146e+01  -3.9251669e+01   1.0486543e+02
   1.8854906e+01  -2.7502272e+01   0.0000000e+00  -1.3354063e+01  -4.2089315e+01   1.2137496e+02
   1.8943236e+01  -2.7604231e+01   0.0000000e+00   2.4904565e+01  -3.5698695e+01   1.1820926e+02
   1.9035274e+01  -2.7703640e+01   0.0000000e+00   3.1562851e+01  -3.5926048e+01   1.1502822e+02
   1.9130935e+01  -2.7800395e+01   0.0000000e+00   6.4928878e+01  -5.7688465e+01   9.4466514e+01
   1.9230129e+01  -2.7894394e+01   0.0000000e+00   5.7986528e+01  -5.1072745e+01   2.0140591e+01
   1.9332762e+01  -2.7985538e+01   0.0000000e+00   2.1712453e+01  -2.2868228e+01   2.8929546e+01
   1.9438735e+01  -2.8073732e+01   0.0000000e+00   4.5337962e+01  -3.1820775e+01   4.6109701e+01
   1.9547944e+01  -2.8158881e+01   0.0000000e+00   5.7002644e+01  -7.5882768e+00   5.9228509e+00
   1.9660282e+01  -2.8240897e+01   0.0000000e+00   5.2376052e+01   3.0364464e+01  -1.0792198e+01
   1.9775638e+01  -2.8319690e+01   0.0000000e+00  -1.0613572e+01   4.7204404e+01  -1.9753443e+01
   1.9893896e+01  -2.8395178e+01   0.0000000e+00  -9.4191233e+01   6.1021188e+01   4.0302481e+01
   2.0014936e+01  -2.8467279e+01   0.0000000e+00  -5.5966010e+01   3.7959759e+01   1.2909566e+02
   2.0138635e+01  -2.8535917e+01   0.0000000e+00   3.6687811e+01   1.3878238e+00   1.3547780e+02
   2.0264866e+01  -2.8601016e+01   0.0000000e+00   7.0833580e+01  -2.6574563e+01   7.3910491e+01
   2.0393498e+01  -2.8662508e+01   0.0000000e+00   3.7330757e+01  -1.9049900e+01   3.0734187e+01
   2.0524398e+01  -2.8720326e+01   0.0000000e+00   1.6165941e+01  -4.2238042e+01   6.0537754e+01
   2.0657429e+01  -2.8774407e+01   0.0000000e+00  -7.2142493e+00  -1.2589951e+02   2.6167770e+01
   2.0792450e+01  -2.8824692e+01   0.0000000e+00  -1.0532939e+02  -1.0871469e+02  -6.3378931e+01
   2.0929318e+01  -2.8871127e+01   0.0000000e+00  -2.0873982e+02  -3.9275306e+00  -3.2987141e+01
   2.1067889e+01  -2.8913662e+01   0.0000000e+00  -2.2735753e+02   4.1689706e+01   1.4160124e+02
   2.1208013e+01  -2.8952250e+01   0.0000000e+00  -1.1238519e+02  -8.2760518e+01   2.2748099e+02
   2.1349541e+01  -2.8986849e+01   0.0000000e+00  -4.0624580e+01  -1.6604914e+02   3.4396733e+01
   2.1492320e+01  -2.9017421e+01   0.0000000e+00  -1.1534294e+02  -4.3619477e+01  -3.3878419e+01
   2.1636196e+01  -2.9043932e+01   0.0000000e+00  -1.5596578e+02  -8.4657681e+01   1.3569341e+01
   2.1781013e+01  -2.9066355e+01   0.0000000e+00  -1.3045587e+02  -8.5060252e+01  -1.3745158e+02
   2.1926614e+01  -2.9084663e+01   0.0000000e+00  -2.9755752e+01   5.4920968e+01   7.0655486e+00
   2.2072840e+01  -2.9098837e+01   0.0000000e+00  -6.9622919e+01  -2.4995801e+02   1.6988447e+02
   2.2219533e+01  -2.9108862e+01   0.0000000e+00  -2.8886250e+02  -5.6365629e+02  -2.9364867e+02
   2.2366531e+01  -2.9114726e+01   0.0000000e+00  -1.0071088e+02  -3.3318908e+02  -8.5231684e+02
   2.2513676e+01  -2.9116423e+01   0.0000000e+00   2.6890475e+02   2.0478392e+02  -1.0087046e+03
   2.2660805e+01  -2.9113951e+01   0.0000000e+00   2.3631744e+02   6.2817307e+02  -5.9825072e+02
   2.2807759e+01  -2.9107313e+01   0.0000000e+00   1.2750428e+02   4.7139066e+02  -1.3504335e+01
   2.2954377e+01  -2.9096516e+01   0.0000000e+00   1.6349647e+02   1.8186449e+02   1.0368504e+02
   2.3100500e+01  -2.9081572e+01   0.0000000e+00   2.0352384e+02   1.6472974e+02   1.1241796e+02
   2.3245967e+01  -2.9062498e+01   0.0000000e+00   1.7912788e+02   4.7861196e+01   1.9180246e+02
   2.3390621e+01  -2.9039314e+01   0.0000000e+00   8.2800261e+01  -2.7551853e+01   1.2831797e+02
   2.3534304e+01  -2.9012045e+01   0.0000000e+00   2.2399985e+01   5.9842895e+00   9.2290127e+01
   2.3676862e+01  -2.8980722e+01   0.0000000e+00   2.0850782e+00   1.0974280e+01   6.7467557e+01
   2.3818141e+01  -2.8945379e+01   0.0000000e+00  -1.6170612e+01   4.8316925e+01   7.6079873e+01
   2.3957988e+01  -2.8906054e+01   0.0000000e+00  -2.3957143e+01   1.2257369e+00   1.0777905e+02
   2.4700234e+01  -2.8764147e+01   0.0000000e+00  -2.2213771e+01   8.1536152e+01   8.9866977e+01
   2.4828699e+01  -2.8701863e+01   0.0000000e+00  -1.3869870e+01   4.2972870e+01   1.2526928e+02
   2.4954798e+01  -2.8636081e+01   0.0000000e+00  -2.2517388e+01  -1.1886762e+01   1.4725398e+02
   2.5078409e+01  -2.8566866e+01   0.0000000e+00  -8.2945102e+00  -4.4979857e+01   9.4624641e+01
   2.5199411e+01  -2.8494290e+01   0.0000000e+00   1.0844115e+01  -2.4182233e+00   1.1717886e+02
   2.5317689e+01  -2.8418426e+01   0.0000000e+00  -3.6455817e+01  -8.9884465e+01   1.4775921e+02
   2.5433129e+01  -2.8339351e+01   0.0000000e+00  -2.9950259e+01  -1.6906722e+02  -3.2358834e+01
   2.5545622e+01  -2.8257145e+01   0.0000000e+00   6.9631732e+01  -5.4195552e+01  -1.2280429e+02
   2.5655063e+01  -2.8171890e+01   0.0000000e+00   1.1834591e+02   8.0661585e-01  -4.9110765e+00
   2.5761351e+01  -2.8083672e+01   0.0000000e+00   1.1631029e+02  -3.7861712e+01   5.6536428e+01
   2.5864388e+01  -2.7992580e+01   0.0000000e+00   1.1610509e+02  -2.6512790e+01   8.9248176e+01
   2.5964080e+01  -2.7898703e+01   0.0000000e+00   6.5062127e+01  -3.9943590e+01   1.6112485e+02
   2.6060338e+01  -2.7802136e+01   0.0000000e+00  -9.7194199e+00  -6.8288303e+01   1.4479994e+02
   2.6153076e+01  -2.7702974e+01   0.0000000e+00  -2.2939646e+01  -1.7809003e+01   1.1023278e+02
   2.6242214e+01  -2.7601315e+01   0.0000000e+00  -5.7659738e+01   2.2319833e+01   1.6043852e+02
   2.6327675e+01  -2.7497260e+01   0.0000000e+00  -1.4598114e+02   2.2478971e+01   1.1949095e+02
   2.6409385e+01  -2.7390910e+01   0.0000000e+00  -1.4411319e+02   8.5409030e+01   1.8447581e+00
   2.6487277e+01  -2.7282370e+01   0.0000000e+00  -7.0906825e+01   1.1183826e+02  -1.3116643e+01
   2.6561286e+01  -2.7171746e+01   0.0000000e+00  -6.7382012e-01   3.7584788e+01  -5.6937488e+00
   2.6631354e+01  -2.7059144e+01   0.0000000e+00   4.8674689e+01   3.1859771e+00   1.5547454e+01
   2.6697424e+01  -2.6944675e+01   0.0000000e+00   7.8540456e+00  -1.7230975e+00   5.4633964e+01
   2.6759446e+01  -2.6828448e+01   0.0000000e+00  -2.4995778e+01  -1.6631105e+01   1.2201332e+01
   2.6817373e+01  -2.6710576e+01   0.0000000e+00   1.4682723e+00  -2.4909134e+01   6.8732989e+00
   2.6871163e+01  -2.6591172e+01   0.0000000e+00  -3.7068090e+01  -6.6463817e+01   2.4123322e+01
   2.6920779e+01  -2.6470349e+01   0.0000000e+00  -6.4754069e+01  -6.4861110e+01  -5.1626300e+01
   2.6966186e+01  -2.6348224e+01   0.0000000e+00  -1.5633904e+01  -2.4556856e+01  -6.3457956e+01
   2.7007356e+01  -2.6224910e+01   0.0000000e+00  -1.6417622e+00  -4.8508150e+01   1.6078398e+01
   2.7044263e+01  -2.6100527e+01   0.0000000e+00  -5.0424447e+01  -2.0864685e+01   2.8370564e+01
   2.7076887e+01  -2.5975189e+01   0.0000000e+00  -7.0552897e+01   7.4004160e+01  -4.0261216e+01
   2.7105211e+01  -2.5849016e+01   0.0000000e+00   1.3507660e+00   7.4272489e+01  -6.5209522e+01
   2.7129222e+01  -2.5722126e+01   0.0000000e+00   4.1846725e+01   5.1120634e+01   3.1446793e+00
   2.7148913e+01  -2.5594636e+01   0.0000000e+00  -2.4999362e+00   9.5525625e+01   4.1476624e+01
   2.7164279e+01  -2.5466666e+01   0.0000000e+00  -2.7660802e+01   8.7535681e+01   6.3662296e+01
   2.7175320e+01  -2.5338334e+01   0.0000000e+00  -1.3668236e+02   4.4592501e+01   8.8956595e+01
   2.7182040e+01  -2.5209758e+01   0.0000000e+00  -2.5410275e+02   8.1104912e+01  -1.0190124e+02
   2.7184445e+01  -2.5081057e+01   0.0000000e+00  -6.3276299e+01   5.9626042e+01  -3.1755463e+02
   2.7182549e+01  -2.4952349e+01   0.0000000e+00   1.7723867e+02  -6.5528006e+01  -1.5486834e+02
   2.7176365e+01  -2.4823752e+01   0.0000000e+00   1.0678822e+02  -7.3723916e+01   7.0735785e+01
   2.7165913e+01  -2.4695383e+01   0.0000000e+00   7.6002353e+00  -2.3961777e+01   3.9827359e+01
   2.7151215e+01  -2.4567359e+01   0.0000000e+00   1.2400708e+01  -7.6539006e+01   4.4384220e+01
   2.7132298e+01  -2.4439796e+01   0.0000000e+00  -6.9444289e+01  -8.8893063e+01   6.4225208e+01
   2.7109191e+01  -2.4312809e+01   0.0000000e+00  -7.7943938e+01  -3.1712446e+01  -7.1036259e+01
   2.7081927e+01  -2.4186513e+01   0.0000000e+00   2.9170540e+01  -9.6089722e+00  -8.6131983e+01
   2.7050544e+01  -2.4061021e+01   0.0000000e+00   1.3021095e+01  -7.2816525e+00   3.5557387e+00
   2.7015080e+01  -2.3936446e+01   0.0000000e+00  -5.0685015e+01  -3.0526907e+01  -7.2745714e+00
   2.6975579e+01  -2.3812898e+01   0.0000000e+00  -8.2053515e+01  -5.6263903e+01  -3.0842799e+01
   2.6932088e+01  -2.3690489e+01   0.0000000e+00  -8.6288337e+01  -6.6400452e+01  -9.5401556e+01
   2.6884655e+01  -2.3569327e+01   0.0000000e+00   2.5726543e+01  -4.3482164e+01  -1.0619376e+02
   2.6833334e+01  -2.3449519e+01   0.0000000e+00   7.6561573e+01   1.0240309e+02   4.0262542e+01
   2.6778179e+01  -2.3331172e+01   0.0000000e+00   9.0945685e+00   1.9750885e+02   4.8948414e+01
   2.6719250e+01  -2.3214390e+01   0.0000000e+00   2.8752863e+01   7.3019450e+01  -4.9801961e+01
   2.6656606e+01  -2.3099276e+01   0.0000000e+00   5.2760452e+01  -3.7918258e+01  -1.8952733e+01
   2.6590313e+01  -2.2985930e+01   0.0000000e+00   2.9277766e+01  -2.3688562e+01   2.3998744e+01
   2.6520437e+01  -2.2874454e+01   0.0000000e+00   4.5944662e+01  -1.6821073e+00   2.4571170e+01
   2.6447046e+01  -2.2764942e+01   0.0000000e+00   4.4316795e+01  -4.5395121e+00   1.8553180e+01
   2.6370214e+01  -2.2657493e+01   0.0000000e+00   3.9692790e+01  -3.0314751e+01   2.5677744e+01
   2.6290014e+01  -2.2552199e+01   0.0000000e+00   2.7455685e+01  -3.3692288e+01   9.1243061e+01
   2.6206523e+01  -2.2449151e+01   0.0000000e+00  -5.1756806e+01  -1.0332125e+01   1.0349939e+02
   2.6119820e+01  -2.2348440e+01   0.0000000e+00  -9.7983474e+01  -2.9025313e+01   2.9822900e+01
   2.6029986e+01  -2.2250152e+01   0.0000000e+00  -7.3850759e+01  -5.7253831e+01  -2.7526813e+00
   2.5937105e+01  -2.2154373e+01   0.0000000e+00  -5.3111481e+01  -5.1951603e+01   7.0022507e+00
   2.5841262e+01  -2.2061186e+01   0.0000000e+00  -4.4447621e+01  -4.5337100e+01   1.2168263e+01
   2.5742546e+01  -2.1970670e+01   0.0000000e+00  -3.8301256e+01  -3.4391840e+01   1.7548688e+01
   2.5641045e+01  -2.1882904e+01   0.0000000e+00  -2.6635073e+01  -7.8126866e+00   3.0142543e+00
   2.5536852e+01  -2.1797963e+01   0.0000000e+00  -1.3114573e+01  -1.4579488e+01  -1.5183703e+01
   2.5430060e+01  -2.1715921e+01   0.0000000e+00  -2.7523032e+01  -2.9608081e+01   3.3599533e+00
   2.5320763e+01  -2.1636847e+01   0.0000000e+00  -3.5844182e+01   3.0772032e+00  -1.7995080e+01
   2.5209060e+01  -2.1560809e+01   0.0000000e+00   4.6380294e+00  -1.5903927e+01  -7.1346681e+01
   2.5095048e+01  -2.1487873e+01   0.0000000e+00   2.0938975e+01  -7.7102745e+01  -1.8994137e+01
   2.4978827e+01  -2.1418100e+01   0.0000000e+00  -2.1784587e+01  -5.1607870e+01   3.9949743e+01
   2.4860499e+01  -2.1351551e+01   0.0000000e+00  -3.2005086e+01  -2.0932083e+01  -7.3557484e+00
   2.4740167e+01  -2.1288282e+01   0.0000000e+00   1.2949223e+01  -5.4975956e+01  -3.1390059e+01
   2.4617936e+01  -2.1228348e+01   0.0000000e+00   4.9683420e+01  -7.7054807e+01   3.7483658e+01
   2.4493910e+01  -2.1171798e+01   0.0000000e+00   4.8910295e+01  -1.8503711e+01   1.0860564e+02
   2.4368197e+01  -2.1118682e+01   0.0000000e+00   3.6961551e+01   8.0596435e+01   4.5533893e+01
   2.4240904e+01  -2.1069044e+01   0.0000000e+00   5.0232917e+01   7.2058711e+01  -6.7199764e+01
   2.4112140e+01  -2.1022927e+01   0.0000000e+00   4.0911424e+01   1.0165874e+01  -5.5527288e+01
   2.3982015e+01  -2.0980369e+01   0.0000000e+00  -3.0249465e+01  -8.4731016e+00  -2.2971128e+01
   2.3850640e+01  -2.0941408e+01   0.0000000e+00  -7.7338220e+01  -3.7138566e+01  -7.9887675e-01
   2.3718127e+01  -2.0906075e+01   0.0000000e+00  -4.0348335e+01  -1.5209453e+01   2.9041369e+01
   2.3584587e+01  -2.0874402e+01   0.0000000e+00   1.3566136e+01  -4.7007132e-01   1.2235112e+00
   2.3450134e+01  -2.0846414e+01   0.0000000e+00   1.3211728e+00  -3.2769688e+01   3.4032064e+01
   2.3314881e+01  -2.0822136e+01   0.0000000e+00  -4.1921105e+01   1.6544950e+01   5.5162509e+01
   2.3178943e+01  -2.0801588e+01   0.0000000e+00  -4.9597995e+01   2.3136373e+01   3.2094375e+00
   2.3042434e+01  -2.0784787e+01   0.0000000e+00  -7.5114426e+01  -5.0333377e-01   4.3385475e+01
   2.2905469e+01  -2.0771748e+01   0.0000000e+00  -1.3508991e+02   4.6502937e+01   1.0563644e+01
   2.2768162e+01  -2.0762482e+01   0.0000000e+00  -1.2759813e+02   4.0435956e+00  -9.0393214e+01
   2.2630631e+01  -2.0756996e+01   0.0000000e+00  -3.1111323e+01  -2.4156048e+01  -6.4282590e+01
   2.2492990e+01  -2.0755296e+01   0.0000000e+00   6.6640915e+01   4.2012535e+00  -7.0310181e+01
   2.2355354e+01  -2.0757382e+01   0.0000000e+00   9.6040902e+01  -5.7847400e+01  -4.9968853e+01
   2.2217840e+01  -2.0763253e+01   0.0000000e+00   6.5865798e+01  -4.7980338e+01   5.1714510e+01
   2.2080563e+01  -2.0772904e+01   0.0000000e+00   3.4393379e+01   1.3706996e+01   3.0576783e+01
   2.1943639e+01  -2.0786326e+01   0.0000000e+00   1.7503816e+01  -7.5048218e+00  -8.8914899e+00
   2.1807183e+01  -2.0803510e+01   0.0000000e+00  -1.0810219e+01  -7.0361744e+00   1.6539774e+00
   2.1671309e+01  -2.0824438e+01   0.0000000e+00  -3.4283816e+01  -1.5752965e-01  -2.2370466e+01
   2.1536133e+01  -2.0849095e+01   0.0000000e+00  -3.4573095e+01   3.8112113e+00  -5.8907969e+01
   2.1401768e+01  -2.0877460e+01   0.0000000e+00  -4.7991964e+01   7.4273293e-01  -1.4026297e+02
   2.1268327e+01  -2.0909507e+01   0.0000000e+00  -6.8854390e+01  -8.8181126e+01  -1.6484953e+02
   2.1135925e+01  -2.0945211e+01   0.0000000e+00  -5.8474920e+01  -1.2942252e+02  -5.7221796e+01
   2.1004672e+01  -2.0984540e+01   0.0000000e+00  -3.6163646e+01  -6.1869514e+01   3.9593749e+00
   2.0874681e+01  -2.1027462e+01   0.0000000e+00   4.0334076e-02  -1.5843223e+01  -1.2865124e+01
   2.0746062e+01  -2.1073939e+01   0.0000000e+00   5.5900983e+01  -5.5950850e+00  -4.0988017e+01
   2.0618925e+01  -2.1123933e+01   0.0000000e+00   7.0481838e+01  -2.5198613e+01  -8.3269102e+01
   2.0493378e+01  -2.1177402e+01   0.0000000e+00   3.8526086e+01  -6.1678282e+01  -7.2028360e+01
   2.0369531e+01  -2.1234298e+01   0.0000000e+00   6.5570884e+00  -3.7265813e+01  -2.3105689e+01
   2.0247488e+01  -2.1294575e+01   0.0000000e+00  -1.9677001e+01   3.5685595e+00  -2.1148668e+01
   2.0127355e+01  -2.1358180e+01   0.0000000e+00  -2.0086145e+01  -2.1218902e+00  -2.3325942e+01
   2.0009238e+01  -2.1425060e+01   0.0000000e+00   3.3412835e+00  -2.1134620e-01  -2.4257714e+01
   1.9893237e+01  -2.1495158e+01   0.0000000e+00   1.4426166e+00  -1.0270083e+01  -4.1339699e+01
   1.9779456e+01  -2.1568413e+01   0.0000000e+00   6.8019233e+00  -4.5934199e+01   1.4733803e+00
   1.9667993e+01  -2.1644763e+01   0.0000000e+00   4.8700526e+01  -2.6849974e+01   4.1279462e+01
   1.9558947e+01  -2.1724142e+01   0.0000000e+00   6.1811962e+01  -2.7352236e-01   1.9968101e+00
   1.9452415e+01  -2.1806483e+01   0.0000000e+00   4.7695352e+01  -6.5128153e+00  -2.6175018e+01
   1.9348492e+01  -2.1891715e+01   0.0000000e+00   2.5601590e+01   4.7438896e+00  -3.9499275e+01
   1.9247271e+01  -2.1979765e+01   0.0000000e+00  -1.6662264e+01  -1.1086907e+00  -3.6704460e+01
   1.9148843e+01  -2.2070556e+01   0.0000000e+00  -2.1018394e+01  -3.2529727e+00   3.1496909e+00
   1.9053298e+01  -2.2164012e+01   0.0000000e+00  -9.5422186e+00   2.5571438e+01  -2.8417616e+00
   1.8960724e+01  -2.2260050e+01   0.0000000e+00  -3.1006699e+01   2.8920275e+01  -1.2953249e+01
   1.8871205e+01  -2.2358588e+01   0.0000000e+00  -2.8168867e+01   3.6851436e+01   3.3408242e+00
   1.8784825e+01  -2.2459542e+01   0.0000000e+00  -2.3104636e+01   5.0857550e+01  -1.6158637e+01
   1.8701666e+01  -2.2562822e+01   0.0000000e+00  -3.7628917e+01   4.1834861e+01  -1.8630191e+01
   1.8621805e+01  -2.2668340e+01   0.0000000e+00  -3.0568602e+01   4.0634672e+01  -9.7850738e+00
   1.8545320e+01  -2.2776004e+01   0.0000000e+00  -2.4729452e+01   2.4408637e+01  -1.5224957e+01
   1.8472284e+01  -2.2885720e+01   0.0000000e+00  -1.7510796e+01   5.5690579e+00   1.8271528e+00
   1.8402770e+01  -2.2997391e+01   0.0000000e+00  -8.7417549e+00   1.0853455e+01   7.1959751e+00
   1.8336845e+01  -2.3110921e+01   0.0000000e+00  -1.3086789e+01   6.2330441e+00   1.1993498e+01
   1.8274577e+01  -2.3226210e+01   0.0000000e+00  -3.1570630e+00   9.6396993e+00   2.5424058e+01
   1.8216029e+01  -2.3343157e+01   0.0000000e+00  -1.6271965e+00   1.7706139e+01   1.8700294e+01
   1.8161262e+01  -2.3461657e+01   0.0000000e+00  -1.3842016e+01   1.1460575e+01   3.2436010e+01
   1.8110335e+01  -2.3581608e+01   0.0000000e+00  -2.6959538e+00   1.6946292e+01   5.7669916e+01
   1.8063301e+01  -2.3702902e+01   0.0000000e+00   1.8995274e+01   1.5346141e+01   5.1778723e+01
   1.8020214e+01  -2.3825432e+01   0.0000000e+00   2.0496314e+01   8.9193708e+00   3.3969565e+01
   1.7981122e+01  -2.3949089e+01   0.0000000e+00   3.6406242e+00   2.2064520e+01   3.6002844e+01
   1.7946072e+01  -2.4073763e+01   0.0000000e+00   3.6385125e+00   3.0566360e+01   4.6342634e+01
   1.7915107e+01  -2.4199342e+01   0.0000000e+00   1.1904663e+01   2.9527242e+01   3.4016358e+01
   1.7888265e+01  -2.4325714e+01   0.0000000e+00   3.0076103e+00   1.6224503e+01   1.2550080e+01
   1.7865583e+01  -2.4452765e+01   0.0000000e+00  -2.4008194e+01  -9.1274321e+00   3.8821348e+00
   1.7847095e+01  -2.4580380e+01   0.0000000e+00  -5.8107282e+01  -1.3384193e+01   4.6396943e+01
   1.7832828e+01  -2.4708444e+01   0.0000000e+00  -2.5662232e+01   6.9605512e+00   1.1185099e+02
   1.7822810e+01  -2.4836842e+01   0.0000000e+00   3.6579645e+01   2.7353911e+01   9.3982763e+01
   1.7817062e+01  -2.4965456e+01   0.0000000e+00   2.6179194e+01   2.0218281e+01   4.8773228e+01
   1.7815603e+01  -2.5094168e+01   0.0000000e+00  -5.0424053e+00   1.8686039e-01   5.1426442e+01
   1.7818447e+01  -2.5222862e+01   0.0000000e+00  -1.7167798e+01   1.1743014e+01   8.2447055e+01
   1.7825607e+01  -2.5351418e+01   0.0000000e+00   1.0218993e+01   3.6122936e+01   1.2646521e+02
   1.7837088e+01  -2.5479719e+01   0.0000000e+00   5.9403495e+01   6.9242627e+01   1.1762463e+02
   1.7852895e+01  -2.5607646e+01   0.0000000e+00   6.9649155e+01   1.0114025e+02   8.8642094e+01
   1.7873026e+01  -2.5735080e+01   0.0000000e+00   9.4045378e+01   7.9695588e+01   5.0214831e+01
   1.7897477e+01  -2.5861902e+01   0.0000000e+00   7.8944014e+01   6.6080154e+01  -2.8453544e+01
   1.7926240e+01  -2.5987996e+01   0.0000000e+00   1.9965273e+01   6.4168205e+01  -1.8646806e+01
   1.7959301e+01  -2.6113241e+01   0.0000000e+00   3.1061745e+01   1.7021543e+01   5.0097318e-01
   1.7996643e+01  -2.6237521e+01   0.0000000e+00   4.2430645e+00   1.8274341e+01  -2.6191778e+01
   1.8038245e+01  -2.6360719e+01   0.0000000e+00  -2.5476905e+01   2.9988781e+01   3.2434245e+01
   1.8084083e+01  -2.6482717e+01   0.0000000e+00   1.6743682e+01  -1.2168027e+01   3.2511100e+01
   1.8134125e+01  -2.6603401e+01   0.0000000e+00   3.5937101e+00   3.4476107e-01  -1.0425555e+01
   1.8188338e+01  -2.6722654e+01   0.0000000e+00   1.0543118e+01   8.5589711e+00  -3.6841394e+00
   1.8246685e+01  -2.6840364e+01   0.0000000e+00  -8.0034681e+00  -2.5034472e+01  -8.4078071e+01
   1.8309121e+01  -2.6956416e+01   0.0000000e+00  -1.4361625e+02  -1.7932611e+01  -7.5790173e+01
   1.8375601e+01  -2.7070700e+01   0.0000000e+00  -1.6396067e+02  -3.6286928e+01   7.8780862e+01
   1.8446073e+01  -2.7183105e+01   0.0000000e+00  -7.1970369e+01  -6.4367336e+01   1.2341892e+02
   1.8520480e+01  -2.7293523e+01   0.0000000e+00  -3.8679118e+01  -3.4157294e+01   1.0097201e+02
   1.8598764e+01  -2.7401844e+01   0.0000000e+00  -3.6724663e+01  -9.7604269e+00   1.2875036e+02
   1.8680860e+01  -2.7507965e+01   0.0000000e+00  -4.5741689e+00  -2.2096957e+01   1.6506827e+02
   1.8766698e+01  -2.7611781e+01   0.0000000e+00   5.1075566e+01  -3.3672841e+01   1.3477174e+02
   1.8856206e+01  -2.7713190e+01   0.0000000e+00   5.6811180e+01  -1.3345327e+01   8.6396866e+01
   1.8949307e+01  -2.7812092e+01   0.0000000e+00   5.7018126e+01  -1.3483281e+01   9.7728381e+01
   1.9045919e+01  -2.7908389e+01   0.0000000e+00   7.3664732e+01  -4.3053363e+01   6.7131492e+01
   1.9145956e+01  -2.8001987e+01   0.0000000e+00   3.7039675e+01  -3.5654767e+01   4.0133371e+01
   1.9249328e+01  -2.8092791e+01   0.0000000e+00   4.3710631e+01  -3.0069028e+01   6.2862498e+01
   1.9355941e+01  -2.8180711e+01   0.0000000e+00   7.5030304e+01  -3.1533895e+01   2.2929596e+01
   1.9465698e+01  -2.8265659e+01   0.0000000e+00   6.1366297e+01  -1.9044922e+01  -2.4524976e+01
   1.9578496e+01  -2.8347550e+01   0.0000000e+00   5.3417703e+01   2.4066420e+01  -7.0233063e+01
   1.9694230e+01  -2.8426301e+01   0.0000000e+00  -2.1314068e+01   1.1841678e+02  -4.2279846e+01
   1.9812791e+01  -2.8501834e+01   0.0000000e+00  -7.0606995e+01   1.0957884e+02   1.1884590e+02
   1.9934064e+01  -2.8574071e+01   0.0000000e+00   1.7864225e+01   1.4508508e+01   1.4955685e+02
   2.0057933e+01  -2.8642939e+01   0.0000000e+00   6.8673949e+01  -8.7550087e+00   5.4259801e+01
   2.0184280e+01  -2.8708368e+01   0.0000000e+00   4.5237772e+01  -1.5066006e+01  -1.5110799e-01
   2.0312979e+01  -2.8770292e+01   0.0000000e+00   1.0449803e+01  -1.3770988e+00  -1.8110432e+01
   2.0443904e+01  -2.8828647e+01   0.0000000e+00  -2.7385238e+01  -1.3643698e+01   2.4320905e+01
   2.0576927e+01  -2.8883373e+01   0.0000000e+00  -3.7812510e+01  -8.3032945e+01   1.1108319e+01
   2.0711915e+01  -2.8934415e+01   0.0000000e+00  -7.9386593e+01  -5.5766188e+01  -4.1469065e+01
   2.0848732e+01  -2.8981720e+01   0.0000000e+00  -1.2647193e+02   1.6156774e+01   2.0458497e+01
   2.0987242e+01  -2.9025238e+01   0.0000000e+00  -6.9239003e+01   3.9572785e+01   1.3279334e+02
   2.1127305e+01  -2.9064927e+01   0.0000000e+00   1.5638190e+01  -3.2052796e+01   1.8684535e+02
   2.1268778e+01  -2.9100743e+01   0.0000000e+00   1.2050324e+01  -1.4239672e+02   5.8982852e+01
   2.1411518e+01  -2.9132651e+01   0.0000000e+00  -2.9813839e+01  -4.7279762e+01  -7.6722334e+01
   2.1555379e+01  -2.9160617e+01   0.0000000e+00  -7.8895734e+01   4.8850628e+01   4.1957249e+01
   2.1700213e+01  -2.9184612e+01   0.0000000e+00  -1.6378743e+02  -9.0521111e+01   1.2285572e+02
   2.1845873e+01  -2.9204611e+01   0.0000000e+00  -1.1633800e+02  -1.5210071e+02  -1.4642305e+01
   2.1992207e+01  -2.9220594e+01   0.0000000e+00   2.9681007e+01  -2.9646158e+01  -2.5625397e+01
   2.2139067e+01  -2.9232544e+01   0.0000000e+00  -1.1378303e+02  -1.3445400e+02   1.9218805e+02
   2.2286299e+01  -2.9240449e+01   0.0000000e+00  -3.7695869e+02  -5.6869110e+02  -6.9304732e+01
   2.2433751e+01  -2.9244300e+01   0.0000000e+00  -3.2854294e+02  -4.2005051e+02  -9.3648451e+02
   2.2581273e+01  -2.9244093e+01   0.0000000e+00  -1.7132713e+02   4.5849570e+02  -9.6780784e+02
   2.2728710e+01  -2.9239829e+01   0.0000000e+00  -7.6567877e+01   6.3893004e+02  -1.1347623e+02
   2.2875911e+01  -2.9231512e+01   0.0000000e+00   7.0731845e+01   1.8361357e+02   9.1079358e+01
   2.3022724e+01  -2.9219151e+01   0.0000000e+00   1.3104242e+02   1.6493896e+02  -6.8177221e+01
   2.3168997e+01  -2.9202758e+01   0.0000000e+00   7.3419757e+01   1.7787312e+02   6.6708286e+01
   2.3314579e+01  -2.9182350e+01   0.0000000e+00   7.1127414e+01   3.2412326e+01   6.5765320e+01
   2.3459321e+01  -2.9157949e+01   0.0000000e+00   7.1517365e+01   4.5381503e+01   4.5753076e+01
   2.3603074e+01  -2.9129581e+01   0.0000000e+00   3.3407712e+01   2.7086281e+01   8.7503267e+01
   2.3745692e+01  -2.9097273e+01   0.0000000e+00   2.2877463e+01   3.9563861e+01   6.5471014e+01
   2.3887028e+01  -2.9061061e+01   0.0000000e+00  -1.3722068e+00   5.5490898e+01   1.2232958e+02
   2.4026939e+01  -2.9020980e+01   0.0000000e+00  -3.0553128e+01  -1.6136800e+01   1.0911089e+02
   2.4165283e+01  -2.8977074e+01   0.0000000e+00  -4.2307357e+01  -5.4830655e+00   5.3400562e+01
   2.4301920e+01  -2.8929386e+01   0.0000000e+00  -7.0336804e+01  -5.8188802e+00   3.9178612e+01
   2.4436714e+01  -2.8877967e+01   0.0000000e+00  -6.5696297e+01   1.3987018e+01  -2.7995647e+01
   2.4569529e+01  -2.8822868e+01   0.0000000e+00  -3.4754970e+01   9.6258531e+01   5.1142667e+00
   2.5284045e+01  -2.8598997e+01   0.0000000e+00   5.1954283e+01  -2.3567300e+01   1.0399074e+02
   2.5402001e+01  -2.8523370e+01   0.0000000e+00  -1.9252905e+01  -1.2431331e+02   1.3700903e+02
   2.5517216e+01  -2.8444644e+01   0.0000000e+00  -6.3448206e+01  -1.5206091e+02  -6.2635868e+01
   2.5629585e+01  -2.8362894e+01   0.0000000e+00   1.8389275e+01  -2.7543784e+01  -1.3775963e+02
   2.5739012e+01  -2.8278198e+01   0.0000000e+00   7.4675277e+01  -1.9946714e+01  -6.7832565e+01
   2.5845402e+01  -2.8190634e+01   0.0000000e+00   1.0409704e+02  -4.6797971e+01  -7.2110869e+01
   2.5948661e+01  -2.8100286e+01   0.0000000e+00   1.2832288e+02  -2.9302634e+00  -2.4442991e+01
   2.6048704e+01  -2.8007237e+01   0.0000000e+00   8.7815860e+01  -1.9644118e+01   6.8235948e+01
   2.6145445e+01  -2.7911575e+01   0.0000000e+00   3.1153273e+01  -6.4472816e+01   6.4266418e+01
   2.6238805e+01  -2.7813389e+01   0.0000000e+00   2.7185851e+01  -3.7852702e+01   4.1778947e+01
   2.6328707e+01  -2.7712769e+01   0.0000000e+00   2.5364673e+01  -1.4969507e+01   8.9470246e+01
   2.6415077e+01  -2.7609809e+01   0.0000000e+00  -2.5502525e+01  -2.3845381e+01   1.0608592e+02
   2.6497849e+01  -2.7504604e+01   0.0000000e+00  -5.9153911e+01   2.4392511e+01   8.4878546e+01
   2.6576956e+01  -2.7397250e+01   0.0000000e+00  -7.6431490e+01   4.5576466e+01   1.0545995e+02
   2.6652337e+01  -2.7287846e+01   0.0000000e+00  -8.1144273e+01  -1.2475587e+01   3.9618569e+01
   2.6723936e+01  -2.7176491e+01   0.0000000e+00   3.1421800e+00  -5.7532225e-01  -4.5926130e+01
   2.6791700e+01  -2.7063287e+01   0.0000000e+00   4.2175514e+01   2.9212124e+01   1.7463177e+01
   2.6855579e+01  -2.6948337e+01   0.0000000e+00  -1.7483820e+01   1.0995205e+01   2.9771970e+01
   2.6915529e+01  -2.6831743e+01   0.0000000e+00  -3.4094066e+01   4.1881823e+01  -1.7870202e+01
   2.6971508e+01  -2.6713612e+01   0.0000000e+00  -6.4094049e+01   3.2493820e+01  -1.2500309e+01
   2.7023479e+01  -2.6594048e+01   0.0000000e+00  -7.5386268e+01  -1.2551253e+01  -5.4675073e+01
   2.7071409e+01  -2.6473160e+01   0.0000000e+00  -3.6947467e+01   3.1232542e+01  -4.2310361e+01
   2.7115268e+01  -2.6351054e+01   0.0000000e+00  -7.8961460e+01   1.6469266e+01  -2.7546092e+01
   2.7155030e+01  -2.6227838e+01   0.0000000e+00  -3.9802789e+01  -6.1114399e+01  -1.1732787e+02
   2.7190675e+01  -2.6103623e+01   0.0000000e+00   5.9683888e+01  -1.3617575e+01  -4.7188767e+01
   2.7222184e+01  -2.5978518e+01   0.0000000e+00  -1.5254148e+01   5.9740773e+01   5.4213481e+01
   2.7249543e+01  -2.5852632e+01   0.0000000e+00  -3.2020930e+01   5.6377790e+01  -2.9008478e+01
   2.7272741e+01  -2.5726075e+01   0.0000000e+00   6.9756033e+01   7.2764230e+01  -5.3169696e+00
   2.7291773e+01  -2.5598959e+01   0.0000000e+00   2.7612148e+01   1.0734249e+02   1.1731647e+02
   2.7306634e+01  -2.5471393e+01   0.0000000e+00  -7.7542409e+01   8.8902744e+01   1.2008282e+02
   2.7317326e+01  -2.5343488e+01   0.0000000e+00  -1.4694917e+02   4.1280512e+01   7.5298337e+01
   2.7323852e+01  -2.5215355e+01   0.0000000e+00  -2.0802842e+02   4.1535075e+01  -1.7433025e+01
   2.7326221e+01  -2.5087105e+01   0.0000000e+00  -1.5162796e+02   4.8564351e+01  -1.8459040e+02
   2.7324443e+01  -2.4958846e+01   0.0000000e+00   3.4204338e+01  -6.1364279e+01  -2.3754700e+02
   2.7318532e+01  -2.4830689e+01   0.0000000e+00   1.4319329e+02  -1.6026811e+02  -6.9182457e+01
   2.7308508e+01  -2.4702744e+01   0.0000000e+00   5.2869791e+01  -9.7816026e+01   8.4091845e+01
   2.7294390e+01  -2.4575119e+01   0.0000000e+00  -6.6788546e+01  -8.2097233e+01   2.9813194e+01
   2.7276203e+01  -2.4447922e+01   0.0000000e+00  -6.0051114e+01  -1.5439219e+02  -5.2940032e+01
   2.7253974e+01  -2.4321261e+01   0.0000000e+00   1.1525295e+00  -9.8672582e+01  -3.9929161e+01
   2.7227735e+01  -2.4195243e+01   0.0000000e+00   2.9995273e+01  -2.1275577e+01   6.9457747e+00
   2.7197519e+01  -2.4069973e+01   0.0000000e+00  -5.8819540e+00  -4.1307844e+01   4.3321814e+01
   2.7163362e+01  -2.3945558e+01   0.0000000e+00  -6.0856602e+01  -4.0239387e+01   1.7668093e+01
   2.7125304e+01  -2.3822100e+01   0.0000000e+00  -9.8939152e+01  -3.2845614e+01  -5.5350898e+01
   2.7083388e+01  -2.3699702e+01   0.0000000e+00  -9.7191542e+01  -4.8855872e+01  -1.8459732e+02
   2.7037658e+01  -2.3578467e+01   0.0000000e+00   6.4543628e+01  -3.7840064e+01  -2.4339030e+02
   2.6988164e+01  -2.3458495e+01   0.0000000e+00   1.6586670e+02  -6.0522815e+00  -9.4928658e+00
   2.6934955e+01  -2.3339886e+01   0.0000000e+00  -2.9585867e+01   3.3367548e+01   1.5054048e+02
   2.6878085e+01  -2.3222737e+01   0.0000000e+00  -1.1976311e+02   2.9339376e+01  -2.4350662e+01
   2.6817610e+01  -2.3107144e+01   0.0000000e+00   8.9438304e+00  -9.4982233e+00  -1.0257591e+02
   2.6753589e+01  -2.2993204e+01   0.0000000e+00   2.7773676e+01  -2.5012452e+01  -5.2940665e+01
   2.6686081e+01  -2.2881009e+01   0.0000000e+00   3.2887002e+01  -4.5346578e+01  -6.4658369e+01
   2.6615151e+01  -2.2770651e+01   0.0000000e+00   7.8728269e+01  -2.4829507e+01  -3.5679104e+00
   2.6540863e+01  -2.2662220e+01   0.0000000e+00   4.0824466e+01   2.3649820e+01   3.0610431e+01
   2.6463287e+01  -2.2555805e+01   0.0000000e+00   1.7486951e+01  -1.0294160e+01   1.3560894e+01
   2.6382491e+01  -2.2451492e+01   0.0000000e+00  -2.1491683e+01  -3.4587183e+01   7.0773550e+01
   2.6298547e+01  -2.2349366e+01   0.0000000e+00  -1.0180147e+02  -3.1921020e+00   4.5185061e+01
   2.6211531e+01  -2.2249510e+01   0.0000000e+00  -8.7453335e+01  -1.5130106e+01  -4.4852611e+01
   2.6121518e+01  -2.2152005e+01   0.0000000e+00  -4.3670427e+01  -4.3142730e+01  -4.2137379e+01
   2.6028587e+01  -2.2056929e+01   0.0000000e+00  -4.7660468e+01  -5.2460009e+01  -1.7225464e+01
   2.5932816e+01  -2.1964359e+01   0.0000000e+00  -3.8164577e+01  -5.4127826e+01  -1.5021829e+01
   2.5834289e+01  -2.1874369e+01   0.0000000e+00  -1.7523169e+01  -4.2904405e+01  -7.6855457e+00
   2.5733089e+01  -2.1787033e+01   0.0000000e+00  -6.6493147e+00  -2.4043752e+01   5.3224103e+00
   2.5629301e+01  -2.1702420e+01   0.0000000e+00  -2.9864146e+00   2.1221213e+00  -1.6926082e+00
   2.5523013e+01  -2.1620598e+01   0.0000000e+00  -9.5740722e+00   3.1842495e+00  -3.0160742e+01
   2.5414312e+01  -2.1541632e+01   0.0000000e+00  -7.2574051e+00  -1.0307853e+01  -3.2262454e+01
   2.5303289e+01  -2.1465587e+01   0.0000000e+00   1.6136648e+01  -9.9831847e+00  -2.7953084e+01
   2.5190035e+01  -2.1392522e+01   0.0000000e+00   1.8803838e+01  -2.9820270e+01  -2.1671151e+01
   2.5074643e+01  -2.1322496e+01   0.0000000e+00  -1.8574021e+01  -4.1730452e+01  -7.2970851e+00
   2.4957208e+01  -2.1255564e+01   0.0000000e+00  -1.7063369e+01  -3.7505963e+01  -2.9591913e+01
   2.4837825e+01  -2.1191781e+01   0.0000000e+00   3.2256324e+01  -5.3191347e+01  -3.0414610e+01
   2.4716590e+01  -2.1131197e+01   0.0000000e+00   3.6343570e+01  -7.4319498e+01   1.6788677e+01
   2.4593602e+01  -2.1073860e+01   0.0000000e+00   2.1600003e+01  -8.5889253e+01   7.5468043e+01
   2.4468959e+01  -2.1019816e+01   0.0000000e+00   5.5506734e+01  -1.6604600e+01   1.3038214e+02
   2.4342761e+01  -2.0969108e+01   0.0000000e+00   8.9505439e+01   8.4463874e+01   9.8937923e+01
   2.4215110e+01  -2.0921775e+01   0.0000000e+00   7.9419319e+01   8.3889577e+01   3.8308958e+01
   2.4086107e+01  -2.0877856e+01   0.0000000e+00   4.0325240e+01   8.2480853e+01   3.0810533e+00
   2.3955855e+01  -2.0837385e+01   0.0000000e+00  -5.4345545e+00   6.5469713e+01  -9.5280880e+01
   2.3824456e+01  -2.0800394e+01   0.0000000e+00  -1.4515994e+01  -4.3071917e+01  -1.0729077e+02
   2.3692016e+01  -2.0766913e+01   0.0000000e+00   1.7557517e+01  -5.3962635e+01   8.9544277e+00
   2.3558639e+01  -2.0736969e+01   0.0000000e+00   1.4208576e+01   4.8806467e+00   3.7426211e+01
   2.3424429e+01  -2.0710584e+01   0.0000000e+00  -1.7866165e+01   6.5567433e+00   2.2657500e+01
   2.3289494e+01  -2.0687779e+01   0.0000000e+00  -2.2722083e+01   3.7601432e+01   2.3167164e+01
   2.3153938e+01  -2.0668574e+01   0.0000000e+00  -6.9432275e+01   6.4361218e+01  -3.0058988e+01
   2.3017869e+01  -2.0652982e+01   0.0000000e+00  -1.2383497e+02   4.9846468e+01  -1.1377532e+02
   2.2881394e+01  -2.0641017e+01   0.0000000e+00  -5.3231384e+01   2.9992786e+00  -1.9079457e+02
   2.2744620e+01  -2.0632688e+01   0.0000000e+00   4.2898615e+01  -8.4779543e+01  -1.4361023e+02
   2.2607654e+01  -2.0628000e+01   0.0000000e+00   6.4480630e+01  -8.3380789e+01   7.8806918e+00
   2.2470603e+01  -2.0626959e+01   0.0000000e+00   6.3926273e+01  -2.2523391e+01   6.8502817e+01
   2.2333575e+01  -2.0629565e+01   0.0000000e+00   2.1435198e+01  -1.4175526e+01   7.4055144e+01
   2.2196678e+01  -2.0635815e+01   0.0000000e+00  -3.1690505e+01   6.0169047e+00   6.8167770e+01
   2.2060019e+01  -2.0645705e+01   0.0000000e+00  -2.2489620e+01   1.7048343e+01   2.2462872e+01
   2.1923705e+01  -2.0659227e+01   0.0000000e+00  -2.0773549e+01   2.1124726e+01  -2.4861062e+00
   2.1787844e+01  -2.0676371e+01   0.0000000e+00  -6.1965053e+01   4.2542600e+01  -5.8241982e+01
   2.1652541e+01  -2.0697122e+01   0.0000000e+00  -7.5419756e+01  -3.2065110e+00  -1.1566290e+02
   2.1517904e+01  -2.0721465e+01   0.0000000e+00  -2.6575505e+01  -3.5608137e+01  -1.0647694e+02
   2.1384039e+01  -2.0749379e+01   0.0000000e+00   3.8722613e+01  -3.6764410e+01  -1.5271065e+02
   2.1251050e+01  -2.0780844e+01   0.0000000e+00   5.0602297e+01  -1.1895496e+02  -1.7913301e+02
   2.1119044e+01  -2.0815834e+01   0.0000000e+00   2.7741773e+01  -1.5642299e+02  -7.9566894e+01
   2.0988125e+01  -2.0854321e+01   0.0000000e+00   3.0783788e+01  -1.0102383e+02  -1.6464699e+01
   2.0858395e+01  -2.0896275e+01   0.0000000e+00   5.5189037e+01  -7.6934168e+01  -6.3733427e+00
   2.0729960e+01  -2.0941663e+01   0.0000000e+00   7.9927640e+01  -5.2568602e+01   1.6647143e+01
   2.0602920e+01  -2.0990449e+01   0.0000000e+00   8.9988595e+01  -2.9659836e+01  -3.4090154e+00
   2.0477377e+01  -2.1042593e+01   0.0000000e+00   7.9375166e+01  -5.2611735e+01  -1.3492600e+01
   2.0353432e+01  -2.1098055e+01   0.0000000e+00   6.8092938e+01  -3.2021129e+01   5.9902462e+00
   2.0231184e+01  -2.1156791e+01   0.0000000e+00   4.5636743e+01   8.0912719e+00  -3.7414669e+01
   2.0110731e+01  -2.1218753e+01   0.0000000e+00   1.1050030e+01  -2.8729361e+01  -6.1146982e+01
   1.9992172e+01  -2.1283893e+01   0.0000000e+00   2.2087384e+01  -5.0293931e+01  -5.9301515e+00
   1.9875602e+01  -2.1352159e+01   0.0000000e+00   4.9485289e+01  -2.6628095e+01  -5.8245098e+00
   1.9761115e+01  -2.1423495e+01   0.0000000e+00   2.1780089e+01  -4.9264693e+01  -1.3559710e+01
   1.9648807e+01  -2.1497846e+01   0.0000000e+00   1.0464656e+01  -4.4483513e+01   5.4661666e+01
   1.9538769e+01  -2.1575152e+01   0.0000000e+00   4.1373542e+01   5.5940899e+00   5.7569651e+01
   1.9431092e+01  -2.1655351e+01   0.0000000e+00   4.6282673e+01  -2.1636421e+00   2.4114235e+01
   1.9325865e+01  -2.1738378e+01   0.0000000e+00   5.7370520e+01   3.8040400e+00   2.8602948e+01
   1.9223177e+01  -2.1824168e+01   0.0000000e+00   4.1660627e+01   3.5876198e+01  -2.5319822e+01
   1.9123113e+01  -2.1912651e+01   0.0000000e+00  -2.8863021e+01   1.0729186e+01  -3.7853060e+01
   1.9025759e+01  -2.2003757e+01   0.0000000e+00  -2.3363322e+01   6.0343166e+00   1.7806018e+01
   1.8931196e+01  -2.2097411e+01   0.0000000e+00   1.1195263e+01   2.8857794e+01  -1.2501898e+01
   1.8839507e+01  -2.2193539e+01   0.0000000e+00  -1.6714989e+01   2.3595534e+01  -3.7823814e+01
   1.8750770e+01  -2.2292062e+01   0.0000000e+00  -1.6459905e+01   3.2587369e+01  -2.2655682e+01
   1.8665063e+01  -2.2392902e+01   0.0000000e+00  -9.6691884e+00   3.8402143e+01  -4.8054857e+01
   1.8582461e+01  -2.2495976e+01   0.0000000e+00  -3.0487740e+01   2.8594291e+01  -5.0880673e+01
   1.8503037e+01  -2.2601201e+01   0.0000000e+00  -3.1496152e+01   1.8197168e+01  -4.0411047e+01
   1.8426863e+01  -2.2708492e+01   0.0000000e+00  -3.1319393e+01  -7.2532421e+00  -2.2414185e+01
   1.8354007e+01  -2.2817760e+01   0.0000000e+00  -1.4997756e+01  -5.2310115e+00   1.2930004e+01
   1.8284537e+01  -2.2928917e+01   0.0000000e+00  -3.0402470e+00   8.8927766e+00   1.9506972e+00
   1.8218518e+01  -2.3041873e+01   0.0000000e+00  -1.5996473e+01  -4.9327977e+00   6.0735770e+00
   1.8156010e+01  -2.3156533e+01   0.0000000e+00   4.1921828e+00  -4.9052222e-01   2.4239077e+01
   1.8097074e+01  -2.3272805e+01   0.0000000e+00   1.0655280e+01   1.0139423e+01   2.0086916e+00
   1.8041768e+01  -2.3390593e+01   0.0000000e+00  -7.7790937e+00   1.1124053e+01   1.2064377e+01
   1.7990146e+01  -2.3509799e+01   0.0000000e+00  -3.6329262e+00   2.8745915e+01   3.1389805e+01
   1.7942261e+01  -2.3630324e+01   0.0000000e+00  -4.7521229e+00   3.3447367e+01   4.1907455e+01
   1.7898162e+01  -2.3752070e+01   0.0000000e+00   1.3478629e+01   3.0828841e+01   5.9822375e+01
   1.7857895e+01  -2.3874935e+01   0.0000000e+00   2.5568129e+01   4.9138608e+01   3.2712478e+01
   1.7821506e+01  -2.3998817e+01   0.0000000e+00  -3.0951616e-01   6.3006610e+01   1.6502393e+01
   1.7789035e+01  -2.4123612e+01   0.0000000e+00  -2.8420497e+00   6.0984836e+01   1.7856209e+01
   1.7760520e+01  -2.4249215e+01   0.0000000e+00  -1.3918293e+01   3.9991853e+01  -2.5061560e+00
   1.7735997e+01  -2.4375522e+01   0.0000000e+00  -3.6519858e+01   4.6866181e+00   1.1139246e+01
   1.7715499e+01  -2.4502426e+01   0.0000000e+00  -4.1354679e+01  -7.3081355e+00   3.9441768e+01
   1.7699054e+01  -2.4629820e+01   0.0000000e+00  -3.6338046e+01   8.4415847e+00   7.8460567e+01
   1.7686689e+01  -2.4757596e+01   0.0000000e+00   2.1328347e+01   2.4969056e+01   9.1439898e+01
   1.7678427e+01  -2.4885645e+01   0.0000000e+00   3.9288389e+01   3.2517823e+01   3.1923523e+01
   1.7674288e+01  -2.5013859e+01   0.0000000e+00  -1.2112798e+01   2.1004012e+01   3.6887517e+01
   1.7674287e+01  -2.5142128e+01   0.0000000e+00  -4.9919060e+00   1.0780002e+01   8.9280910e+01
   1.7678438e+01  -2.5270341e+01   0.0000000e+00   2.3385646e+01   4.1406396e+01   1.0418717e+02
   1.7686750e+01  -2.5398390e+01   0.0000000e+00   7.0556075e+01   8.6773091e+01   1.0353511e+02
   1.7699230e+01  -2.5526163e+01   0.0000000e+00   1.0545543e+02   1.1698470e+02   1.7614204e+01
   1.7715881e+01  -2.5653549e+01   0.0000000e+00   4.5611016e+01   1.1115001e+02  -3.1971563e+01
   1.7736700e+01  -2.5780439e+01   0.0000000e+00   5.0302043e+01   5.1678579e+01   6.1827790e-01
   1.7761684e+01  -2.5906722e+01   0.0000000e+00   6.6157452e+01   3.3187976e+01  -5.6954055e+01
   1.7790825e+01  -2.6032286e+01   0.0000000e+00  -1.1432292e+01   5.8978778e+01  -4.3006539e+01
   1.7824110e+01  -2.6157023e+01   0.0000000e+00   1.1968799e+01   2.7582359e+01   2.6752858e+01
   1.7861523e+01  -2.6280823e+01   0.0000000e+00   3.3372096e+01   3.1924929e+01  -3.4963002e+01
   1.7903046e+01  -2.6403575e+01   0.0000000e+00  -3.2753795e+01   7.0358312e+01  -1.4102671e+01
   1.7948655e+01  -2.6525172e+01   0.0000000e+00  -4.1676008e+00   1.9874540e+01   4.3564182e+01
   1.7998322e+01  -2.6645506e+01   0.0000000e+00   2.1911575e+01  -8.5755172e+00  -2.6253560e+01
   1.8052016e+01  -2.6764468e+01   0.0000000e+00  -1.8282594e+01   1.7648557e+00  -6.3455524e+01
   1.8109704e+01  -2.6881953e+01   0.0000000e+00  -7.5212658e+01  -3.5220632e+01  -7.1160790e+01
   1.8171344e+01  -2.6997854e+01   0.0000000e+00  -1.7461732e+02  -3.7583009e+01  -1.0624636e+01
   1.8236896e+01  -2.7112068e+01   0.0000000e+00  -1.6307003e+02  -2.8936123e+01   1.6048632e+02
   1.8306311e+01  -2.7224492e+01   0.0000000e+00  -3.6024541e+01  -5.3991010e+01   2.0679462e+02
   1.8379539e+01  -2.7335022e+01   0.0000000e+00   1.2795194e+01  -3.6691885e+01   1.3626174e+02
   1.8456526e+01  -2.7443559e+01   0.0000000e+00   3.5449711e+00   8.3773545e+00   1.2236674e+02
   1.8537213e+01  -2.7550003e+01   0.0000000e+00   2.1296167e+01   2.1292415e+01   1.5010489e+02
   1.8621536e+01  -2.7654256e+01   0.0000000e+00   5.9502704e+01  -1.0866873e+01   1.3889259e+02
   1.8709430e+01  -2.7756224e+01   0.0000000e+00   6.3848238e+01  -2.7768203e+01   8.1733853e+01
   1.8800824e+01  -2.7855811e+01   0.0000000e+00   4.8169631e+01  -1.1954620e+01   7.7712966e+01
   1.8895644e+01  -2.7952925e+01   0.0000000e+00   7.1066839e+01  -2.5018027e+01   8.7632210e+01
   1.8993812e+01  -2.8047477e+01   0.0000000e+00   8.1281349e+01  -1.4306949e+01   6.3834050e+01
   1.9095245e+01  -2.8139378e+01   0.0000000e+00   9.1440510e+01   9.8252469e+00   7.5218369e+01
   1.9199858e+01  -2.8228542e+01   0.0000000e+00   1.1243250e+02  -1.6949883e+00   4.2454699e+01
   1.9307562e+01  -2.8314886e+01   0.0000000e+00   8.9047116e+01   6.6877992e+00   4.0208962e+00
   1.9418263e+01  -2.8398328e+01   0.0000000e+00   9.2517126e+01  -4.3590445e+00  -2.3813982e+01
   1.9531865e+01  -2.8478790e+01   0.0000000e+00   6.9449360e+01   5.5233569e+01  -1.2827397e+02
   1.9648269e+01  -2.8556195e+01   0.0000000e+00  -1.4898394e+01   1.9384387e+02  -4.9111161e+01
   1.9767369e+01  -2.8630471e+01   0.0000000e+00   9.7719020e+00   1.3193802e+02   1.2678360e+02
   1.9889061e+01  -2.8701547e+01   0.0000000e+00   5.3891693e+01   4.6289114e+00   6.4111920e+01
   2.0013234e+01  -2.8769354e+01   0.0000000e+00   1.0519759e+01  -7.7663706e-01   2.0686930e+00
   2.0139775e+01  -2.8833829e+01   0.0000000e+00  -1.0726583e+01  -2.0952436e+01  -1.6915326e-01
   2.0268567e+01  -2.8894909e+01   0.0000000e+00  -3.8058698e+01   5.7396832e+00  -2.4087372e+01
   2.0399494e+01  -2.8952536e+01   0.0000000e+00  -6.5044946e+01   7.9414248e+00   5.8890318e+01
   2.0532431e+01  -2.9006654e+01   0.0000000e+00  -5.4330704e+01  -7.2745655e+01   5.6281370e+01
   2.0667257e+01  -2.9057212e+01   0.0000000e+00  -8.0341088e+01  -3.3323967e+01   2.9374134e+00
   2.0803844e+01  -2.9104160e+01   0.0000000e+00  -7.4881838e+01  -3.2553815e+00   7.0837173e+01
   2.0942063e+01  -2.9147453e+01   0.0000000e+00   1.0258951e+01  -3.3526582e+01   5.8138015e+01
   2.1081784e+01  -2.9187049e+01   0.0000000e+00   5.3723828e+01  -1.1866329e+01   2.9486173e+01
   2.1222873e+01  -2.9222910e+01   0.0000000e+00   7.1693293e+00  -6.5891506e+01   2.4115623e+01
   2.1365196e+01  -2.9255000e+01   0.0000000e+00  -6.3213068e+01  -6.5788756e+01  -8.2731999e+01
   2.1508616e+01  -2.9283290e+01   0.0000000e+00  -8.2086905e+01   6.9871348e+01  -3.8702343e+01
   2.1652996e+01  -2.9307750e+01   0.0000000e+00  -6.5496910e+01   2.8992346e+01   1.8271162e+02
   2.1798196e+01  -2.9328358e+01   0.0000000e+00  -5.8168734e+01  -2.0421971e+02   1.6635175e+02
   2.1944077e+01  -2.9345093e+01   0.0000000e+00   2.5425820e+00  -2.0004223e+02  -1.2505803e+02
   2.2090497e+01  -2.9357939e+01   0.0000000e+00   7.0650104e+01   7.6293272e+01  -7.2372273e+01
   2.2237314e+01  -2.9366883e+01   0.0000000e+00  -1.0866748e+02  -1.0526580e+02   2.7553574e+02
   2.2384387e+01  -2.9371917e+01   0.0000000e+00  -4.3601050e+02  -5.1641163e+02  -1.0618045e+02
   2.2531571e+01  -2.9373035e+01   0.0000000e+00  -3.9250227e+02  -6.1351914e+01  -6.7822110e+02
   2.2678725e+01  -2.9370237e+01   0.0000000e+00  -4.0118098e+01   4.9334435e+02  -2.6955995e+02
   2.2825705e+01  -2.9363525e+01   0.0000000e+00   8.1707038e+01   2.3591682e+02   9.9730072e+01
   2.2972370e+01  -2.9352906e+01   0.0000000e+00   3.3849813e+01   1.2510052e+02  -1.0452380e+02
   2.3118576e+01  -2.9338390e+01   0.0000000e+00   4.6964594e+01   2.6150707e+02   1.8774593e+01
   2.3264182e+01  -2.9319991e+01   0.0000000e+00   1.2674031e+01   9.3611563e+01   1.5977995e+02
   2.3409047e+01  -2.9297728e+01   0.0000000e+00  -9.5018009e+00   2.6136846e+01   3.9332525e+01
   2.3553033e+01  -2.9271622e+01   0.0000000e+00   3.5500740e+01   5.0139412e+01   6.3237928e+01
   2.3695999e+01  -2.9241698e+01   0.0000000e+00   4.9941167e+01   1.8061264e+01   5.6643932e+01
   2.3837809e+01  -2.9207986e+01   0.0000000e+00   4.5695220e+01   7.7964916e+01   6.6091870e+01
   2.3978328e+01  -2.9170519e+01   0.0000000e+00   1.8193651e+01   3.4095570e+01   1.4894232e+02
   2.4117420e+01  -2.9129332e+01   0.0000000e+00  -1.1971237e+01  -1.4790829e+01   9.2750319e+01
   2.4254955e+01  -2.9084465e+01   0.0000000e+00  -2.7143571e+01   3.0722433e+01   8.9814196e+01
   2.4390802e+01  -2.9035963e+01   0.0000000e+00  -6.7825383e+01   4.2078667e+00   9.7186202e+01
   2.4524833e+01  -2.8983872e+01   0.0000000e+00  -6.8894008e+01   4.3163545e+01   3.7503421e+01
   2.4656923e+01  -2.8928242e+01   0.0000000e+00  -4.2614916e+01   9.1724794e+01   9.5489663e+01
   2.4786949e+01  -2.8869127e+01   0.0000000e+00  -3.4665212e+01   4.1939701e+01   1.3513572e+02
   2.4914790e+01  -2.8806583e+01   0.0000000e+00  -1.2989020e+01   9.8041736e+00   1.4321817e+02
   2.5040329e+01  -2.8740671e+01   0.0000000e+00  -1.8515931e+01  -5.9525324e+01   1.4148653e+02
   2.5163451e+01  -2.8671454e+01   0.0000000e+00   5.5311357e+00  -7.1006806e+01   5.4177692e+01
   2.5837641e+01  -2.8373015e+01   0.0000000e+00  -5.0053662e+00   3.7910645e+00  -9.1597312e+01
   2.5944205e+01  -2.8285289e+01   0.0000000e+00   1.9388146e+01   2.5574134e+01  -1.3184343e+02
   2.6047713e+01  -2.8194849e+01   0.0000000e+00   6.8744407e+01   6.9094640e+01  -6.8906639e+01
   2.6148081e+01  -2.8101775e+01   0.0000000e+00   4.7214730e+01   2.8526654e+01   3.5805275e+01
   2.6245230e+01  -2.8006149e+01   0.0000000e+00   4.9126705e+00  -2.6614478e+01   3.0640834e+01
   2.6339083e+01  -2.7908057e+01   0.0000000e+00   2.1719932e+01  -1.7491015e+01   6.1200644e+00
   2.6429569e+01  -2.7807585e+01   0.0000000e+00   3.1664224e+01   7.0952229e-01   4.4099694e+01
   2.6516617e+01  -2.7704820e+01   0.0000000e+00   6.2140617e-01  -3.5403852e-01   6.8751992e+01
   2.6600162e+01  -2.7599852e+01   0.0000000e+00  -1.1907898e+01   8.7331849e+00   8.9931687e+01
   2.6680143e+01  -2.7492774e+01   0.0000000e+00  -3.7093245e+01  -2.9179699e+01   1.2801231e+02
   2.6756501e+01  -2.7383677e+01   0.0000000e+00  -7.3158821e+01  -7.9137036e+01   4.3847380e+01
   2.6829181e+01  -2.7272657e+01   0.0000000e+00  -1.0409319e+01  -1.2358138e+01  -5.8299051e+01
   2.6898132e+01  -2.7159809e+01   0.0000000e+00   4.4416824e+01   4.5382559e+01   3.5862166e+00
   2.6963308e+01  -2.7045230e+01   0.0000000e+00   1.4067436e+01   3.4383422e+01   2.9143566e+01
   2.7024665e+01  -2.6929018e+01   0.0000000e+00   1.1890634e+01   1.1666791e+02   3.1396830e+01
   2.7082162e+01  -2.6811273e+01   0.0000000e+00  -8.4912167e+01   1.6543637e+02   1.1440584e+02
   2.7135765e+01  -2.6692094e+01   0.0000000e+00  -1.9219818e+02   6.3205921e+01   1.2605321e+01
   2.7185439e+01  -2.6571583e+01   0.0000000e+00  -5.2817232e+01   9.5707869e+00  -7.7865677e+01
   2.7231156e+01  -2.6449842e+01   0.0000000e+00  -1.8962122e+01   3.0255150e+01   5.6529080e+01
   2.7272890e+01  -2.6326972e+01   0.0000000e+00  -1.5674412e+02   3.2112498e+01  -3.2671691e+01
   2.7310620e+01  -2.6203078e+01   0.0000000e+00  -2.9344827e+01   3.4299450e+01  -1.8819626e+02
   2.7344327e+01  -2.6078262e+01   0.0000000e+00   9.3183911e+01   1.4986606e+01  -1.6141383e+01
   2.7373997e+01  -2.5952629e+01   0.0000000e+00  -1.3857488e+01   2.9741186e+00   6.0721870e+01
   2.7399618e+01  -2.5826283e+01   0.0000000e+00   2.0316984e+01   4.2494326e+01  -2.1862779e+01
   2.7421182e+01  -2.5699329e+01   0.0000000e+00   1.0652327e+02   6.9821721e+01   8.8542717e+01
   2.7438684e+01  -2.5571871e+01   0.0000000e+00   4.8250942e+00   7.4342567e+01   2.1018268e+02
   2.7452124e+01  -2.5444014e+01   0.0000000e+00  -1.3342805e+02   6.5230859e+01   1.6717980e+02
   2.7461504e+01  -2.5315862e+01   0.0000000e+00  -1.9865444e+02   2.2544028e+01   4.6560070e+01
   2.7466828e+01  -2.5187521e+01   0.0000000e+00  -1.8754281e+02   1.3053269e+01  -7.9082930e+01
   2.7468106e+01  -2.5059095e+01   0.0000000e+00  -1.5254737e+02   4.0501937e+01  -1.8598106e+02
   2.7465348e+01  -2.4930688e+01   0.0000000e+00  -5.9500909e+01  -1.8320781e+01  -3.0839687e+02
   2.7458571e+01  -2.4802405e+01   0.0000000e+00   1.2029895e+02  -1.2671520e+02  -2.4923264e+02
   2.7447792e+01  -2.4674347e+01   0.0000000e+00   8.6182775e+01  -1.3079362e+02   3.0596028e-01
   2.7433031e+01  -2.4546619e+01   0.0000000e+00  -1.1930725e+02  -9.0609936e+01  -2.7739405e+01
   2.7414313e+01  -2.4419322e+01   0.0000000e+00  -6.8139739e+01  -1.1971896e+02  -2.1939039e+02
   2.7391663e+01  -2.4292559e+01   0.0000000e+00   7.0231253e+01  -1.4482095e+02  -1.2660382e+02
   2.7365113e+01  -2.4166431e+01   0.0000000e+00   1.3145953e+01  -1.2796416e+02   2.0513279e+00
   2.7334694e+01  -2.4041037e+01   0.0000000e+00  -4.0652078e+01  -1.1027959e+02  -4.1169498e+01
   2.7300442e+01  -2.3916477e+01   0.0000000e+00  -5.0921878e+01  -8.6786806e+01  -6.5772503e+01
   2.7262393e+01  -2.3792850e+01   0.0000000e+00  -8.8961195e+01  -5.0301036e+01  -1.4121382e+02
   2.7220590e+01  -2.3670253e+01   0.0000000e+00   1.5171106e+01   4.3983088e+01  -2.9947463e+02
   2.7175073e+01  -2.3548782e+01   0.0000000e+00   2.0867673e+02   1.4729791e+02  -2.4584772e+02
   2.7125890e+01  -2.3428533e+01   0.0000000e+00   1.5263803e+02   1.1221471e+02   1.4535360e+01
   2.7073088e+01  -2.3309600e+01   0.0000000e+00  -8.6637813e+01   3.2064853e+01   7.3110329e+01
   2.7016717e+01  -2.3192075e+01   0.0000000e+00  -1.0654011e+02   2.6953942e+01  -8.8771015e+01
   2.6956831e+01  -2.3076050e+01   0.0000000e+00   2.1177670e+01   1.3349494e+01  -1.1059767e+02
   2.6893483e+01  -2.2961615e+01   0.0000000e+00   2.9062104e+01  -1.4588374e+00  -5.9540617e+01
   2.6826733e+01  -2.2848859e+01   0.0000000e+00   6.1265780e+01   2.7023371e+00  -8.9377639e+01
   2.6756638e+01  -2.2737870e+01   0.0000000e+00   1.2709813e+02  -7.1336170e+00  -1.2210292e+01
   2.6683260e+01  -2.2628732e+01   0.0000000e+00   6.1847271e+01   2.2843019e+01   7.8639040e+01
   2.6606664e+01  -2.2521530e+01   0.0000000e+00   8.3029436e+00   5.1895928e+01   2.9164623e+01
   2.6526914e+01  -2.2416347e+01   0.0000000e+00  -1.0875752e+01   3.0512181e+01   1.4312311e+01
   2.6444079e+01  -2.2313262e+01   0.0000000e+00  -9.3130571e+01   1.4690805e+01   3.5482330e+00
   2.6358228e+01  -2.2212356e+01   0.0000000e+00  -9.4807037e+01  -1.0487860e+01  -5.7859961e+01
   2.6269433e+01  -2.2113705e+01   0.0000000e+00  -3.8488510e+01  -2.7738207e+01  -3.9448511e+01
   2.6177765e+01  -2.2017385e+01   0.0000000e+00  -5.7305509e+01  -2.4725210e+01  -3.3102501e+01
   2.6083302e+01  -2.1923469e+01   0.0000000e+00  -5.1369650e+01  -6.2484154e+01  -6.8569472e+01
   2.5986118e+01  -2.1832028e+01   0.0000000e+00  -3.1614227e+00  -7.3860269e+01  -2.8977062e+01
   2.5886293e+01  -2.1743133e+01   0.0000000e+00   6.7686443e-01  -4.2058664e+01   6.7345401e+00
   2.5783907e+01  -2.1656850e+01   0.0000000e+00   3.8400734e+00  -3.7478887e+01   1.6531618e+01
   2.5679040e+01  -2.1573246e+01   0.0000000e+00   1.9382192e+01   5.1484342e-03   4.0603144e+01
   2.5571775e+01  -2.1492382e+01   0.0000000e+00  -8.6252930e-01   3.5989766e+01   5.3675331e+00
   2.5462197e+01  -2.1414322e+01   0.0000000e+00  -1.2183740e+01  -1.2680527e+01  -3.6007909e+01
   2.5350392e+01  -2.1339122e+01   0.0000000e+00   1.4011931e+01  -3.7847276e+01  -1.1679885e+00
   2.5236446e+01  -2.1266841e+01   0.0000000e+00   2.7749035e+00  -4.8467070e+00   1.2394558e+01
   2.5120447e+01  -2.1197533e+01   0.0000000e+00  -1.8465559e+01  -1.9184758e+01  -4.2426187e+01
   2.5002485e+01  -2.1131250e+01   0.0000000e+00   3.5024811e+01  -6.4228130e+01  -4.0720591e+01
   2.4882651e+01  -2.1068041e+01   0.0000000e+00   5.6575298e+01  -4.8796144e+01   2.9421519e+01
   2.4761035e+01  -2.1007955e+01   0.0000000e+00   8.8731452e-01  -4.0074106e+01   1.7926367e+01
   2.4637732e+01  -2.0951037e+01   0.0000000e+00   1.1118570e+01  -1.1378990e+02   1.7602522e+01
   2.4512833e+01  -2.0897328e+01   0.0000000e+00   5.7515657e+01  -9.5144349e+01   1.5403724e+02
   2.4386435e+01  -2.0846871e+01   0.0000000e+00   4.0336448e+01   4.6473456e+01   1.9134327e+02
   2.4258631e+01  -2.0799701e+01   0.0000000e+00   2.1304051e+01   8.4822842e+01   9.6933877e+01
   2.4129519e+01  -2.0755855e+01   0.0000000e+00   2.8635217e+01   8.0863066e+01   6.3345540e+01
   2.3999195e+01  -2.0715366e+01   0.0000000e+00   4.2084541e+01   1.0591230e+02  -1.3781163e+01
   2.3867758e+01  -2.0678263e+01   0.0000000e+00   5.5861918e+01   9.8899953e+00  -7.8588986e+01
   2.3735304e+01  -2.0644575e+01   0.0000000e+00   3.5102011e+01  -5.6959281e+01   2.7120346e+01
   2.3601934e+01  -2.0614326e+01   0.0000000e+00   2.4851977e+00   1.3838077e+01   7.2499438e+01
   2.3467746e+01  -2.0587540e+01   0.0000000e+00  -1.0860077e+01   2.5089591e+01   2.6491454e+01
   2.3332841e+01  -2.0564237e+01   0.0000000e+00  -3.0711314e+01   3.2390712e+01   4.0057630e+01
   2.3197319e+01  -2.0544433e+01   0.0000000e+00  -2.5020396e+01   9.6681416e+01  -5.1447442e+01
   2.3061279e+01  -2.0528143e+01   0.0000000e+00   4.5336557e+01   4.8545214e+01  -1.9887666e+02
   2.2924824e+01  -2.0515380e+01   0.0000000e+00   1.1674265e+02  -5.5348766e+01  -1.4979939e+02
   2.2788054e+01  -2.0506154e+01   0.0000000e+00   1.1215361e+02  -7.8906757e+01  -2.6307799e+00
   2.2651071e+01  -2.0500470e+01   0.0000000e+00   4.3784784e+01  -5.1881752e+01   9.0028149e+01
   2.2513977e+01  -2.0498334e+01   0.0000000e+00  -3.1849371e+01   1.7280671e+00   1.2535832e+02
   2.2376871e+01  -2.0499747e+01   0.0000000e+00  -8.7457347e+01   4.2273537e+01   7.7792845e+01
   2.2239857e+01  -2.0504707e+01   0.0000000e+00  -9.9762567e+01   2.0362209e+01  -3.7427007e+00
   2.2103036e+01  -2.0513212e+01   0.0000000e+00  -6.5176606e+01  -1.6034292e+01  -1.7318803e+01
   2.1966508e+01  -2.0525255e+01   0.0000000e+00  -3.0154815e+01   1.0461482e+01  -7.7437573e+00
   2.1830376e+01  -2.0540826e+01   0.0000000e+00  -1.0336877e+01   5.6141801e+01  -9.4781693e+01
   2.1694740e+01  -2.0559915e+01   0.0000000e+00   6.4799616e+00  -2.2561968e+00  -2.0490408e+02
   2.1559701e+01  -2.0582506e+01   0.0000000e+00   2.6935274e+01  -1.0387535e+02  -1.7363388e+02
   2.1425359e+01  -2.0608584e+01   0.0000000e+00   7.4806765e+01  -1.1742126e+02  -8.4144625e+01
   2.1291814e+01  -2.0638128e+01   0.0000000e+00   1.2026321e+02  -1.1909699e+02  -6.2725254e+01
   2.1159165e+01  -2.0671117e+01   0.0000000e+00   1.1558998e+02  -1.5060948e+02  -3.6970727e+01
   2.1027513e+01  -2.0707526e+01   0.0000000e+00   9.6382051e+01  -1.3717123e+02   9.4802432e+00
   2.0896954e+01  -2.0747327e+01   0.0000000e+00   9.1238966e+01  -1.1073383e+02   3.6705954e+01
   2.0767587e+01  -2.0790492e+01   0.0000000e+00   9.2389248e+01  -8.6405621e+01   6.9532892e+01
   2.0639509e+01  -2.0836986e+01   0.0000000e+00   1.0350776e+02  -4.1349473e+01   6.4392277e+01
   2.0512816e+01  -2.0886777e+01   0.0000000e+00   1.0197496e+02  -3.7643277e+01   2.4330625e+01
   2.0387604e+01  -2.0939826e+01   0.0000000e+00   8.6347142e+01  -4.8308568e+01   3.9594660e+01
   2.0263968e+01  -2.0996093e+01   0.0000000e+00   9.0479196e+01  -3.4941761e+00   4.0468383e+01
   2.0142001e+01  -2.1055537e+01   0.0000000e+00   8.0951694e+01   3.8353458e+00  -3.4084680e+01
   2.0021796e+01  -2.1118113e+01   0.0000000e+00   3.4934342e+01  -5.6231826e+01  -3.7521157e+01
   1.9903445e+01  -2.1183773e+01   0.0000000e+00   2.5445086e+01  -5.6447640e+01   3.9279734e+01
   1.9787039e+01  -2.1252469e+01   0.0000000e+00   4.6856960e+01  -1.9302735e+01   4.0052702e+01
   1.9672667e+01  -2.1324148e+01   0.0000000e+00   2.3688283e+01  -3.3410119e+01   2.3284200e+01
   1.9560418e+01  -2.1398757e+01   0.0000000e+00   1.0239792e+01  -2.5073046e+01   6.3908043e+01
   1.9450379e+01  -2.1476239e+01   0.0000000e+00   3.5373340e+01   8.4189908e+00   5.3861015e+01
   1.9342636e+01  -2.1556536e+01   0.0000000e+00   3.1591180e+01   1.0361949e+00   3.5857224e+01
   1.9237273e+01  -2.1639587e+01   0.0000000e+00   4.5303181e+01   2.7470740e+01   5.2958726e+01
   1.9134374e+01  -2.1725329e+01   0.0000000e+00   6.2867857e+01   6.9739274e+01  -2.7329964e+01
   1.9034020e+01  -2.1813697e+01   0.0000000e+00  -1.2295903e+01   3.3480070e+01  -9.6196692e+01
   1.8936292e+01  -2.1904624e+01   0.0000000e+00  -5.6354049e+01   4.9553580e+00  -2.1619371e+01
   1.8841268e+01  -2.1998041e+01   0.0000000e+00  -4.6260672e+00   2.5613425e+01   1.2502169e+01
   1.8749024e+01  -2.2093877e+01   0.0000000e+00   6.1155062e+00   2.0890397e+01  -3.2105693e+01
   1.8659637e+01  -2.2192059e+01   0.0000000e+00  -3.9027188e+00   7.1116808e+00  -3.9087776e+01
   1.8573180e+01  -2.2292512e+01   0.0000000e+00   1.4046632e+01   7.9278967e+00  -4.9749315e+01
   1.8489724e+01  -2.2395159e+01   0.0000000e+00   2.7494069e+00   1.7788622e+00  -7.4360506e+01
   1.8409340e+01  -2.2499921e+01   0.0000000e+00  -2.0722256e+01  -1.5094627e+01  -6.5830141e+01
   1.8332096e+01  -2.2606718e+01   0.0000000e+00  -2.9304685e+01  -2.7185946e+01  -2.4670405e+01
   1.8258057e+01  -2.2715467e+01   0.0000000e+00  -1.6835911e+01  -7.2608238e+00   1.5250598e+01
   1.8187288e+01  -2.2826087e+01   0.0000000e+00  -1.2161066e+00   1.1356243e+01   3.7171716e+00
   1.8119850e+01  -2.2938489e+01   0.0000000e+00  -2.0543403e+01  -5.4483624e+00   6.7384396e-01
   1.8055804e+01  -2.3052589e+01   0.0000000e+00  -1.2736355e+01  -1.3809857e+01   3.8247076e+01
   1.7995208e+01  -2.3168297e+01   0.0000000e+00   2.3780219e+01  -1.0999610e+01   2.8708293e+01
   1.7938116e+01  -2.3285523e+01   0.0000000e+00   2.0443148e+01  -1.0657719e+01   9.6445405e+00
   1.7884582e+01  -2.3404177e+01   0.0000000e+00   1.9584160e+01   1.2740815e+01   1.6680847e+01
   1.7834657e+01  -2.3524166e+01   0.0000000e+00   1.2048708e+01   4.3951427e+01   8.1586014e+00
   1.7788390e+01  -2.3645395e+01   0.0000000e+00  -9.1394418e+00   6.4215355e+01   2.6476943e+01
   1.7745825e+01  -2.3767771e+01   0.0000000e+00   1.8750246e+01   7.4851682e+01   2.9155185e+01
   1.7707008e+01  -2.3891196e+01   0.0000000e+00   2.8177395e+01   7.6855785e+01  -2.3953808e+01
   1.7671979e+01  -2.4015573e+01   0.0000000e+00  -5.8922017e+00   7.9406726e+01  -4.6149338e+01
   1.7640775e+01  -2.4140805e+01   0.0000000e+00  -2.8357395e+01   6.0507357e+01  -4.4828037e+01
   1.7613434e+01  -2.4266792e+01   0.0000000e+00  -5.5276048e+01   1.9788344e+01  -2.1919625e+01
   1.7589987e+01  -2.4393434e+01   0.0000000e+00  -5.3157750e+01   2.6962879e-01   3.2254339e+01
   1.7570465e+01  -2.4520629e+01   0.0000000e+00  -3.2415212e+01   3.9153248e+00   5.2511609e+01
   1.7554895e+01  -2.4648278e+01   0.0000000e+00  -1.8373228e+01   1.2268549e+01   7.3726574e+01
   1.7543302e+01  -2.4776277e+01   0.0000000e+00   3.4873438e+01   1.3999671e+01   7.1569184e+01
   1.7535707e+01  -2.4904523e+01   0.0000000e+00   3.2869715e+01   1.2252113e+01   1.8324364e+01
   1.7532129e+01  -2.5032913e+01   0.0000000e+00  -1.7163101e+01   2.6050534e+01   5.5024906e+01
   1.7532583e+01  -2.5161344e+01   0.0000000e+00   2.4960352e+01   5.3646291e+01   1.1425746e+02
   1.7537082e+01  -2.5289710e+01   0.0000000e+00   7.8286941e+01   9.2348837e+01   7.4208011e+01
   1.7545634e+01  -2.5417909e+01   0.0000000e+00   9.7958128e+01   1.0896773e+02   4.5190896e+00
   1.7558246e+01  -2.5545834e+01   0.0000000e+00   8.1109809e+01   7.6097374e+01  -8.8013559e+01
   1.7574920e+01  -2.5673382e+01   0.0000000e+00  -9.2484391e+00   4.5586181e+01  -8.8788904e+01
   1.7595657e+01  -2.5800448e+01   0.0000000e+00   9.9834195e+00   2.0421290e+01   1.1024552e+01
   1.7620451e+01  -2.5926927e+01   0.0000000e+00   8.3151909e+01   1.0027487e+01  -4.2659004e+01
   1.7649296e+01  -2.6052713e+01   0.0000000e+00   2.6854162e+00   5.7468978e+01  -9.1873538e+01
   1.7682181e+01  -2.6177704e+01   0.0000000e+00  -1.1215795e+01   6.0834194e+01   3.6761479e+00
   1.7719093e+01  -2.6301795e+01   0.0000000e+00   5.5242336e+01   2.4364344e+01  -4.1715641e+01
   1.7760012e+01  -2.6424881e+01   0.0000000e+00  -1.8000473e+01   6.3870832e+01  -1.0867912e+02
   1.7804919e+01  -2.6546861e+01   0.0000000e+00  -5.5463501e+01   6.1789412e+01  -2.1135937e+01
   1.7853789e+01  -2.6667631e+01   0.0000000e+00  -1.0266065e+01  -1.6926359e+01  -2.3432387e+01
   1.7906593e+01  -2.6787090e+01   0.0000000e+00  -5.8488314e+01  -4.3969306e+01  -7.9582608e+01
   1.7963299e+01  -2.6905135e+01   0.0000000e+00  -1.3154412e+02  -5.5764506e+01  -2.6610428e+01
   1.8023872e+01  -2.7021668e+01   0.0000000e+00  -1.5296394e+02  -5.0387880e+01   7.0480868e+01
   1.8088273e+01  -2.7136588e+01   0.0000000e+00  -1.0674249e+02   4.1824541e+00   1.8393832e+02
   1.8156458e+01  -2.7249797e+01   0.0000000e+00   6.5072383e+00   1.7472492e+01   2.3264201e+02
   1.8228383e+01  -2.7361197e+01   0.0000000e+00   6.7680673e+01   5.3247092e+00   1.7012708e+02
   1.8303995e+01  -2.7470694e+01   0.0000000e+00   5.1202912e+01   2.2740178e+01   1.1737471e+02
   1.8383241e+01  -2.7578191e+01   0.0000000e+00   3.3739104e+01   3.8618395e+01   1.1917771e+02
   1.8466065e+01  -2.7683597e+01   0.0000000e+00   4.0241580e+01   2.5986989e+01   1.4225709e+02
   1.8552404e+01  -2.7786818e+01   0.0000000e+00   6.0900978e+01  -1.1352181e+01   1.3539380e+02
   1.8642194e+01  -2.7887765e+01   0.0000000e+00   6.9439523e+01  -1.5054137e+01   1.0403538e+02
   1.8735367e+01  -2.7986350e+01   0.0000000e+00   9.1298528e+01   1.7038911e+00   1.0775598e+02
   1.8831850e+01  -2.8082485e+01   0.0000000e+00   1.3646607e+02  -4.4036841e+00   7.6592170e+01
   1.8931569e+01  -2.8176085e+01   0.0000000e+00   1.5288522e+02   2.3916670e+01   7.4285572e+00
   1.9034443e+01  -2.8267069e+01   0.0000000e+00   1.4766957e+02   4.9087194e+01  -1.9329158e+01
   1.9140391e+01  -2.8355355e+01   0.0000000e+00   1.3387770e+02   4.1675193e+01  -4.7580035e+01
   1.9249326e+01  -2.8440864e+01   0.0000000e+00   1.2086032e+02   4.6253452e+01  -6.9741422e+01
   1.9361160e+01  -2.8523521e+01   0.0000000e+00   1.0969108e+02   2.3598977e+01  -1.1916053e+02
   1.9475799e+01  -2.8603251e+01   0.0000000e+00   4.2980330e+01   7.6307406e+01  -2.0413823e+02
   1.9593148e+01  -2.8679982e+01   0.0000000e+00  -2.2299136e+01   1.9714602e+02  -1.1564092e+02
   1.9713108e+01  -2.8753646e+01   0.0000000e+00  -1.4245469e+01   1.3384442e+02   4.5105786e+01
   1.9835577e+01  -2.8824176e+01   0.0000000e+00  -2.0882859e+00   1.3229727e+01   4.2793073e+01
   1.9960450e+01  -2.8891508e+01   0.0000000e+00  -3.3452844e+00   1.2303180e+01   1.8334952e+01
   2.0087619e+01  -2.8955581e+01   0.0000000e+00  -2.1224533e+01   2.2087834e+00   1.6802277e+01
   2.0216974e+01  -2.9016337e+01   0.0000000e+00  -5.5853153e+01   1.2889614e+01   1.4747712e+01
   2.0348402e+01  -2.9073720e+01   0.0000000e+00  -3.9925621e+01   1.9500178e+01   7.8723694e+01
   2.0481786e+01  -2.9127678e+01   0.0000000e+00  -2.5173785e+01  -3.9991341e+01   7.0770619e+01
   2.0617009e+01  -2.9178162e+01   0.0000000e+00  -4.5796551e+01  -2.1578633e+01   3.1651584e+01
   2.0753950e+01  -2.9225125e+01   0.0000000e+00  -2.4217904e+01  -1.8634809e+01   7.5433370e+01
   2.0892486e+01  -2.9268524e+01   0.0000000e+00   9.0932787e+00  -8.3878090e+01   1.6717745e+01
   2.1032494e+01  -2.9308319e+01   0.0000000e+00   1.2582288e+01  -3.4696156e+01  -7.4358253e+01
   2.1173847e+01  -2.9344474e+01   0.0000000e+00  -1.7831391e+01   1.4239360e+01  -2.7743576e+01
   2.1316416e+01  -2.9376955e+01   0.0000000e+00  -8.4693434e+01  -2.2205201e+01   5.4266364e+00
   2.1460072e+01  -2.9405732e+01   0.0000000e+00  -9.6996968e+01   3.0178357e+00   4.7971020e+00
   2.1604683e+01  -2.9430779e+01   0.0000000e+00  -3.1620734e+01   2.0104209e+01   8.6275738e+01
   2.1750119e+01  -2.9452072e+01   0.0000000e+00   2.0423363e+01  -1.2758419e+02   1.4557302e+02
   2.1896245e+01  -2.9469592e+01   0.0000000e+00   2.4442511e+01  -2.7284522e+02  -5.0188088e+01
   2.2042927e+01  -2.9483322e+01   0.0000000e+00   3.3117731e+01  -6.4169578e+01  -2.9256256e+02
   2.2190030e+01  -2.9493249e+01   0.0000000e+00   4.5569769e+01   1.7978430e+02  -2.9513615e+01
   2.2337419e+01  -2.9499366e+01   0.0000000e+00  -9.7625175e+01  -1.3418211e+02   2.8109633e+02
   2.2484958e+01  -2.9501665e+01   0.0000000e+00  -2.5735353e+02  -3.8032746e+02  -1.3042336e+02
   2.2632511e+01  -2.9500144e+01   0.0000000e+00  -7.2854857e+01   3.6609395e+01  -5.0531392e+02
   2.2779941e+01  -2.9494806e+01   0.0000000e+00   1.4845237e+02   3.2993740e+02  -2.2277879e+02
   2.2927114e+01  -2.9485655e+01   0.0000000e+00   5.7057568e+01   2.0933103e+02  -5.4561435e+00
   2.3073893e+01  -2.9472699e+01   0.0000000e+00   1.0767794e+01   1.8854309e+02  -1.7199382e+01
   2.3220143e+01  -2.9455950e+01   0.0000000e+00   7.4804441e+01   1.8465660e+02   1.0265838e+02
   2.3365730e+01  -2.9435425e+01   0.0000000e+00   2.0432127e+01   6.3588642e+01   1.7860933e+02
   2.3510521e+01  -2.9411142e+01   0.0000000e+00   1.3490752e+01  -1.4084544e+01   1.1259815e+02
   2.3654382e+01  -2.9383123e+01   0.0000000e+00   7.6418237e+01  -8.0102024e+00   2.5674322e+01
   2.3797183e+01  -2.9351395e+01   0.0000000e+00   6.6476219e+01   7.2528279e+01   1.4640654e+01
   2.3938794e+01  -2.9315986e+01   0.0000000e+00   4.6913914e+01   7.6254686e+01   9.8745873e+01
   2.4079086e+01  -2.9276930e+01   0.0000000e+00   3.2456217e+01  -5.5455657e-01   1.0225005e+02
   2.4217933e+01  -2.9234263e+01   0.0000000e+00   1.5962706e+01   2.0057053e+01   6.9653041e+01
   2.4355209e+01  -2.9188023e+01   0.0000000e+00   9.6873577e+00   2.5407085e+01   1.1705359e+02
   2.4490792e+01  -2.9138253e+01   0.0000000e+00  -1.2576018e+01   5.1093156e-01   1.0712470e+02
   2.4624561e+01  -2.9085000e+01   0.0000000e+00  -1.0226358e+01   4.7454481e+01   1.0621062e+02
   2.4756397e+01  -2.9028311e+01   0.0000000e+00   1.5401929e+00   3.4783513e+01   1.6886230e+02
   2.4886184e+01  -2.8968238e+01   0.0000000e+00  -4.4633387e+00  -1.1365505e+01   1.6414089e+02
   2.5013808e+01  -2.8904837e+01   0.0000000e+00  -1.5873191e+00  -3.8833896e+01   1.5653205e+02
   2.5139158e+01  -2.8838164e+01   0.0000000e+00  -1.2024674e+01  -1.0349894e+02   1.1549459e+02
   2.5262125e+01  -2.8768281e+01   0.0000000e+00   1.7382953e+01  -8.7771265e+01   2.2624807e+01
   2.5382605e+01  -2.8695251e+01   0.0000000e+00   6.6162873e+01  -5.7239011e+01   5.6553369e+01
   2.5500495e+01  -2.8619139e+01   0.0000000e+00   4.8943075e+00  -1.2058109e+02   6.3916540e+01
   2.5615694e+01  -2.8540015e+01   0.0000000e+00  -5.3969871e+01  -9.0254872e+01  -6.5195795e+01
   2.5728107e+01  -2.8457949e+01   0.0000000e+00  -2.0644637e+01   1.2197719e+00  -1.0041392e+02
   2.6355445e+01  -2.8089973e+01   0.0000000e+00  -6.7772386e+00  -2.8172629e+01   3.7834968e+01
   2.6449408e+01  -2.7991713e+01   0.0000000e+00   1.0090022e+01  -1.5768687e+00  -4.9451214e+00
   2.6540080e+01  -2.7891132e+01   0.0000000e+00   2.9101124e+01   2.3225497e+01   3.0241075e+01
   2.6627397e+01  -2.7788315e+01   0.0000000e+00   8.5985238e+00   1.0209275e+01   7.8808223e+01
   2.6711295e+01  -2.7683346e+01   0.0000000e+00  -9.9860548e+00  -2.0139950e+01   9.7079841e+01
   2.6791717e+01  -2.7576312e+01   0.0000000e+00  -3.6756226e+01  -7.4271736e+01   8.2603801e+01
   2.6868606e+01  -2.7467302e+01   0.0000000e+00  -5.4486241e+01  -8.9765036e+01  -1.4069991e+01
   2.6941911e+01  -2.7356404e+01   0.0000000e+00   1.1935615e+01  -9.7979533e+00  -6.6074475e+01
   2.7011584e+01  -2.7243711e+01   0.0000000e+00   5.2793219e+01   3.5033601e+01   1.0353182e+01
   2.7077579e+01  -2.7129314e+01   0.0000000e+00   3.9418394e+01   3.1074951e+01   1.9107310e+01
   2.7139855e+01  -2.7013306e+01   0.0000000e+00   1.0831154e+02   1.2275210e+02   6.8555686e+01
   2.7198373e+01  -2.6895781e+01   0.0000000e+00   3.4005766e+01   1.8848405e+02   3.0889196e+02
   2.7253098e+01  -2.6776834e+01   0.0000000e+00  -2.5470570e+02   9.8301483e+01   2.8156276e+02
   2.7303999e+01  -2.6656561e+01   0.0000000e+00  -2.4498126e+02   3.9905019e+00  -5.3535020e+01
   2.7351048e+01  -2.6535059e+01   0.0000000e+00   1.1734750e+01  -1.8555521e+01  -8.4882731e+01
   2.7394220e+01  -2.6412423e+01   0.0000000e+00  -1.6754964e+01   1.6263112e+01   7.0339671e+01
   2.7433492e+01  -2.6288753e+01   0.0000000e+00  -1.3096634e+02   8.7746384e+01  -1.4310852e+01
   2.7468848e+01  -2.6164146e+01   0.0000000e+00  -3.4371539e+01   6.0356461e+01  -9.5181306e+01
   2.7500273e+01  -2.6038700e+01   0.0000000e+00   3.1586791e+01  -2.7585183e+01  -3.3158135e+01
   2.7527753e+01  -2.5912516e+01   0.0000000e+00   2.7796288e+01  -1.2703872e+01  -1.5631376e+01
   2.7551281e+01  -2.5785691e+01   0.0000000e+00   8.5473708e+01   2.0338105e+01   2.1945319e+01
   2.7570851e+01  -2.5658325e+01   0.0000000e+00   9.6935003e+01   3.4565054e+00   1.5381220e+02
   2.7586461e+01  -2.5530518e+01   0.0000000e+00  -2.7357608e+01   1.4307476e+01   2.4776979e+02
   2.7598111e+01  -2.5402369e+01   0.0000000e+00  -1.8961804e+02   2.0522754e+01   1.6612202e+02
   2.7605805e+01  -2.5273977e+01   0.0000000e+00  -2.0422674e+02   1.8194777e+01  -2.7059751e+01
   2.7609551e+01  -2.5145441e+01   0.0000000e+00  -1.2015189e+02   7.5449632e+01  -1.0598552e+02
   2.7609357e+01  -2.5016861e+01   0.0000000e+00  -1.3658400e+02   1.3830455e+02  -1.5452701e+02
   2.7605236e+01  -2.4888335e+01   0.0000000e+00  -8.5347299e+01   1.2450757e+02  -3.0891906e+02
   2.7597204e+01  -2.4759962e+01   0.0000000e+00   8.4225399e+01   3.2599381e+01  -2.7244937e+02
   2.7585278e+01  -2.4631839e+01   0.0000000e+00   2.9120403e+01  -5.4834624e+01  -8.3992150e+01
   2.7569480e+01  -2.4504064e+01   0.0000000e+00  -1.0826065e+02  -4.3012596e+01  -1.4219042e+02
   2.7549834e+01  -2.4376734e+01   0.0000000e+00  -2.7916338e+01  -1.2793381e+01  -2.6446745e+02
   2.7526364e+01  -2.4249945e+01   0.0000000e+00   3.6091101e+01  -7.3748616e+01  -2.2058825e+02
   2.7499101e+01  -2.4123793e+01   0.0000000e+00   1.5993458e+01  -1.1244454e+02  -1.8900353e+02
   2.7468076e+01  -2.3998372e+01   0.0000000e+00   2.3178609e+01  -5.0894026e+01  -1.6707096e+02
   2.7433323e+01  -2.3873777e+01   0.0000000e+00  -3.0869650e+01  -9.0077716e+00  -1.9759161e+02
   2.7394878e+01  -2.3750101e+01   0.0000000e+00   5.8695757e+01   3.3725913e+01  -3.3834064e+02
   2.7352780e+01  -2.3627436e+01   0.0000000e+00   3.4745850e+02   2.1525587e+02  -2.0549648e+02
   2.7307070e+01  -2.3505874e+01   0.0000000e+00   3.1017815e+02   3.6918141e+02   1.8083191e+02
   2.7257792e+01  -2.3385504e+01   0.0000000e+00  -6.2998415e+01   2.5574509e+02   2.3527750e+02
   2.7204991e+01  -2.3266416e+01   0.0000000e+00  -2.0056870e+02   4.9496371e+01  -7.4845244e+00
   2.7148715e+01  -2.3148697e+01   0.0000000e+00  -6.7462259e+01  -1.0682442e+01  -1.0185018e+02
   2.7089014e+01  -2.3032435e+01   0.0000000e+00   1.2457259e+01   2.2751875e-01  -7.1524797e+01
   2.7025940e+01  -2.2917715e+01   0.0000000e+00   3.4837854e+01   1.0543041e+00  -7.9465383e+01
   2.6959549e+01  -2.2804620e+01   0.0000000e+00   9.2415546e+01   2.6626988e+00  -5.3413562e+01
   2.6889895e+01  -2.2693235e+01   0.0000000e+00   1.1005671e+02  -1.2512303e+01   3.8747736e+01
   2.6817037e+01  -2.2583640e+01   0.0000000e+00   6.5886340e+01  -2.6044535e-01   8.8730244e+01
   2.6741035e+01  -2.2475915e+01   0.0000000e+00   4.7752074e+01   5.6403234e+01   8.3642042e+01
   2.6661951e+01  -2.2370139e+01   0.0000000e+00   1.5956656e+01   1.0315799e+02   9.1165454e+01
   2.6579849e+01  -2.2266389e+01   0.0000000e+00  -8.1442714e+01   1.2003384e+02   3.1215744e+01
   2.6494794e+01  -2.2164739e+01   0.0000000e+00  -1.1208045e+02   5.5075299e+01  -9.1637142e+01
   2.6406854e+01  -2.2065263e+01   0.0000000e+00  -6.5385661e+01  -4.9180124e+01  -8.0524651e+01
   2.6316096e+01  -2.1968034e+01   0.0000000e+00  -7.3314687e+01  -5.0300948e+01  -2.3464207e+01
   2.6222593e+01  -2.1873121e+01   0.0000000e+00  -6.3359147e+01  -3.3350438e+01  -8.7482979e+01
   2.6126416e+01  -2.1780593e+01   0.0000000e+00   1.0409082e+01  -8.0376008e+01  -8.2254847e+01
   2.6027637e+01  -2.1690516e+01   0.0000000e+00   8.3472002e+00  -6.8615301e+01   1.1491341e+01
   2.5926334e+01  -2.1602955e+01   0.0000000e+00  -2.8962104e+01  -5.0561358e+01   2.8785166e+00
   2.5822581e+01  -2.1517973e+01   0.0000000e+00   3.3296905e-01  -8.2632134e+01   1.9676999e+01
   2.5716457e+01  -2.1435631e+01   0.0000000e+00  -1.5193591e+00  -1.9037143e+01   8.4064840e+01
   2.5608040e+01  -2.1355988e+01   0.0000000e+00  -3.2407415e+01   4.6924201e+01  -2.6061259e+00
   2.5497412e+01  -2.1279101e+01   0.0000000e+00   3.6891171e+00  -2.4110858e+01  -6.3520807e+01
   2.5384653e+01  -2.1205024e+01   0.0000000e+00   8.1386536e+00  -4.6219930e+01   3.1752297e+01
   2.5269847e+01  -2.1133811e+01   0.0000000e+00  -4.0927005e+01   2.5549811e+00   1.6882412e+01
   2.5153077e+01  -2.1065512e+01   0.0000000e+00   8.1075554e+00  -5.3634674e+01  -5.4479186e+01
   2.5034429e+01  -2.1000176e+01   0.0000000e+00   6.7230523e+01  -9.1238973e+01   4.6828384e+01
   2.4913988e+01  -2.0937849e+01   0.0000000e+00  -2.1810015e+00  -1.1208554e+01   8.6045021e+01
   2.4791842e+01  -2.0878576e+01   0.0000000e+00  -3.0924521e+01  -3.1509845e+01  -4.0665304e+01
   2.4668078e+01  -2.0822399e+01   0.0000000e+00   3.9162562e+01  -1.5184548e+02  -1.9546012e+00
   2.4542785e+01  -2.0769358e+01   0.0000000e+00   3.7103836e+01  -1.1267784e+02   1.7609275e+02
   2.4416053e+01  -2.0719489e+01   0.0000000e+00  -4.2724334e+00   3.3235408e+01   1.8124884e+02
   2.4287972e+01  -2.0672830e+01   0.0000000e+00   1.8723569e+00   7.2783428e+01   9.1216142e+01
   2.4158634e+01  -2.0629412e+01   0.0000000e+00  -3.6233676e+00   6.2314923e+01   7.0334163e+01
   2.4028130e+01  -2.0589266e+01   0.0000000e+00  -1.9699691e+00   7.0240757e+01   3.9812395e+01
   2.3896552e+01  -2.0552422e+01   0.0000000e+00   1.2032363e+01   2.3242713e+01   5.7432559e+00
   2.3763993e+01  -2.0518904e+01   0.0000000e+00  -1.9015516e+01  -2.7830175e+01   4.1073763e+01
   2.3630548e+01  -2.0488737e+01   0.0000000e+00  -4.0506134e+01   5.9665914e-01   7.6124639e+01
   2.3496310e+01  -2.0461942e+01   0.0000000e+00  -4.9163879e+01   4.0668281e+01   4.3574806e+01
   2.3361374e+01  -2.0438538e+01   0.0000000e+00  -6.1854173e+01   2.6055587e+01  -2.4011454e+01
   2.3225834e+01  -2.0418541e+01   0.0000000e+00   4.0539217e+01  -1.2236161e+01  -3.8744223e+01
   2.3089785e+01  -2.0401965e+01   0.0000000e+00   1.8166877e+02  -1.6075407e+01   3.0029784e+01
   2.2953324e+01  -2.0388823e+01   0.0000000e+00   1.4811266e+02   5.4679695e+00   8.1802440e+01
   2.2816545e+01  -2.0379124e+01   0.0000000e+00   1.9637751e+01   1.5525675e+00   9.0398507e+01
   2.2679544e+01  -2.0372873e+01   0.0000000e+00  -7.1644911e+01   1.6159139e+01   1.1380404e+02
   2.2542418e+01  -2.0370077e+01   0.0000000e+00  -1.5902927e+02   6.9518959e+01   7.3563802e+01
   2.2405262e+01  -2.0370736e+01   0.0000000e+00  -1.8788270e+02   5.5748647e+01  -5.0535361e+01
   2.2268172e+01  -2.0374850e+01   0.0000000e+00  -1.1316814e+02  -2.0986119e+01  -1.0981058e+02
   2.2131245e+01  -2.0382417e+01   0.0000000e+00  -4.8808847e+01  -5.3741545e+01  -8.0334644e+01
   2.1994576e+01  -2.0393431e+01   0.0000000e+00  -2.3284026e+01  -3.6858421e+01  -5.4175606e+01
   2.1858260e+01  -2.0407884e+01   0.0000000e+00   4.0421861e+01  -1.3777512e+01  -7.1761862e+01
   2.1722394e+01  -2.0425766e+01   0.0000000e+00   1.1523130e+02  -3.5770856e+01  -1.1977338e+02
   2.1587073e+01  -2.0447065e+01   0.0000000e+00   1.2887617e+02  -1.0983451e+02  -1.1158630e+02
   2.1452392e+01  -2.0471765e+01   0.0000000e+00   9.8543096e+01  -1.4009022e+02  -2.6706169e+01
   2.1318446e+01  -2.0499849e+01   0.0000000e+00   7.9186958e+01  -1.2378715e+02   2.7545757e+01
   2.1185328e+01  -2.0531297e+01   0.0000000e+00   8.8398004e+01  -1.3998454e+02   4.8824412e+01
   2.1053132e+01  -2.0566086e+01   0.0000000e+00   1.0819805e+02  -1.4395967e+02   9.2926132e+01
   2.0921953e+01  -2.0604193e+01   0.0000000e+00   1.0821281e+02  -1.0591266e+02   1.1533458e+02
   2.0791883e+01  -2.0645591e+01   0.0000000e+00   8.6649923e+01  -8.1062802e+01   1.1356702e+02
   2.0663013e+01  -2.0690249e+01   0.0000000e+00   8.3102414e+01  -6.1827513e+01   1.2283486e+02
   2.0535436e+01  -2.0738137e+01   0.0000000e+00   1.0595369e+02  -4.0950128e+01   1.1299178e+02
   2.0409243e+01  -2.0789220e+01   0.0000000e+00   1.1007397e+02  -3.7222588e+01   9.1636661e+01
   2.0284523e+01  -2.0843462e+01   0.0000000e+00   9.3199924e+01  -1.6741458e+01   8.4705184e+01
   2.0161365e+01  -2.0900825e+01   0.0000000e+00   9.5332423e+01   9.2588974e+00   4.9280403e+01
   2.0039859e+01  -2.0961268e+01   0.0000000e+00   9.1011285e+01  -1.6198206e+01  -5.1945289e+00
   1.9920092e+01  -2.1024748e+01   0.0000000e+00   4.9343601e+01  -5.1058515e+01   2.6779599e+00
   1.9802151e+01  -2.1091220e+01   0.0000000e+00   2.7412871e+01  -3.1784141e+01   4.7386776e+01
   1.9686120e+01  -2.1160637e+01   0.0000000e+00   3.5959294e+01  -5.3960001e+00   4.1518628e+01
   1.9572085e+01  -2.1232948e+01   0.0000000e+00   1.5151011e+01  -1.1299847e+01   2.8339201e+01
   1.9460129e+01  -2.1308104e+01   0.0000000e+00  -1.5391983e+00  -5.2049539e+00   5.7574695e+01
   1.9350335e+01  -2.1386049e+01   0.0000000e+00   2.1084562e+01   9.2135667e+00   6.1348016e+01
   1.9242784e+01  -2.1466728e+01   0.0000000e+00   3.2260032e+01   8.5820909e+00   4.4638396e+01
   1.9137555e+01  -2.1550084e+01   0.0000000e+00   5.1137879e+01   3.4593643e+01   3.5705155e+01
   1.9034727e+01  -2.1636057e+01   0.0000000e+00   8.4241760e+01   5.2216381e+01  -4.0130715e+01
   1.8934378e+01  -2.1724585e+01   0.0000000e+00   4.6718868e+01   8.4845392e+00  -1.1755527e+02
   1.8836583e+01  -2.1815605e+01   0.0000000e+00  -2.0972433e+01  -8.9728056e-01  -8.0946586e+01
   1.8741417e+01  -2.1909051e+01   0.0000000e+00  -3.2179648e+01   4.1824523e+01  -4.2523779e+01
   1.8648953e+01  -2.2004856e+01   0.0000000e+00  -2.5708611e+01   2.3222972e+01  -5.8525705e+01
   1.8559262e+01  -2.2102951e+01   0.0000000e+00  -1.0396614e+01  -2.3002427e+01  -3.9630617e+01
   1.8472415e+01  -2.2203264e+01   0.0000000e+00   2.4386988e+01  -2.2018997e+01  -2.6199036e+01
   1.8388478e+01  -2.2305724e+01   0.0000000e+00   2.7385844e+01  -2.6922396e+01  -5.0644284e+01
   1.8307520e+01  -2.2410257e+01   0.0000000e+00   5.8986224e+00  -4.8200080e+01  -4.3970065e+01
   1.8229604e+01  -2.2516785e+01   0.0000000e+00  -4.3055397e+00  -3.8931876e+01  -1.5650889e+01
   1.8154795e+01  -2.2625233e+01   0.0000000e+00  -1.2974804e+00  -1.0883425e+01  -5.4684016e+00
   1.8083152e+01  -2.2735520e+01   0.0000000e+00   5.6693402e+00   7.8248407e+00  -1.7279590e+01
   1.8014736e+01  -2.2847567e+01   0.0000000e+00  -1.7977727e+01   7.8382475e+00  -2.6543409e+01
   1.7949604e+01  -2.2961291e+01   0.0000000e+00  -4.0665877e+01  -3.1709157e+00   1.0540014e+01
   1.7887810e+01  -2.3076610e+01   0.0000000e+00  -9.5903770e+00  -9.1606701e+00   5.1655843e+01
   1.7829410e+01  -2.3193438e+01   0.0000000e+00   2.2260938e+01  -1.4431969e+01   5.2406703e+01
   1.7774454e+01  -2.3311689e+01   0.0000000e+00   4.3983746e+01  -7.3491407e+00   4.5128467e+01
   1.7722991e+01  -2.3431277e+01   0.0000000e+00   6.5804897e+01   3.6920890e+01   4.6416590e+00
   1.7675069e+01  -2.3552112e+01   0.0000000e+00   2.5647467e+01   7.9381185e+01  -5.3543638e+01
   1.7630732e+01  -2.3674106e+01   0.0000000e+00  -1.2556334e+01   6.8360644e+01  -4.8065535e+01
   1.7590022e+01  -2.3797168e+01   0.0000000e+00   2.5816307e+01   4.0801224e+01  -4.1687067e+01
   1.7552981e+01  -2.3921205e+01   0.0000000e+00   3.5031512e+01   4.1924348e+01  -9.1698073e+01
   1.7519646e+01  -2.4046126e+01   0.0000000e+00  -2.0851385e+01   3.4797083e+01  -1.1225539e+02
   1.7490053e+01  -2.4171837e+01   0.0000000e+00  -6.3890457e+01   5.5581203e+00  -6.5694672e+01
   1.7464233e+01  -2.4298243e+01   0.0000000e+00  -6.7959447e+01  -7.1313571e-01   3.4514582e+00
   1.7442219e+01  -2.4425250e+01   0.0000000e+00  -4.5123545e+01   6.8656637e+00   4.4441833e+01
   1.7424038e+01  -2.4552761e+01   0.0000000e+00  -2.8563847e+01   2.2745031e+00   5.8670536e+01
   1.7409714e+01  -2.4680680e+01   0.0000000e+00  -4.1844366e+00   2.8623191e+00   8.6164139e+01
   1.7399272e+01  -2.4808910e+01   0.0000000e+00   4.2870673e+01   7.0390995e+00   8.3024191e+01
   1.7392729e+01  -2.4937353e+01   0.0000000e+00   4.0117589e+01   2.3834249e+01   4.9993090e+01
   1.7390105e+01  -2.5065911e+01   0.0000000e+00   2.7524648e+01   7.2037199e+01   6.3137272e+01
   1.7391413e+01  -2.5194486e+01   0.0000000e+00   7.2134021e+01   1.0697174e+02   4.5236351e+01
   1.7396664e+01  -2.5322979e+01   0.0000000e+00   7.9014212e+01   9.0057174e+01  -3.6128522e+01
   1.7405867e+01  -2.5451290e+01   0.0000000e+00   4.5579773e+01   3.6003727e+01  -7.3087709e+01
   1.7419027e+01  -2.5579320e+01   0.0000000e+00   1.7147771e+01  -1.0288887e+01  -7.6887849e+01
   1.7436148e+01  -2.5706971e+01   0.0000000e+00  -2.5336473e+01  -5.5632397e+00  -3.7216561e+01
   1.7457228e+01  -2.5834142e+01   0.0000000e+00   1.9795059e+01   4.3442600e+00   2.9613155e+01
   1.7482265e+01  -2.5960734e+01   0.0000000e+00   9.3506175e+01  -8.0698335e+00  -4.3816228e+01
   1.7511251e+01  -2.6086648e+01   0.0000000e+00   1.9540393e+01   2.4805195e+01  -1.2826983e+02
   1.7544176e+01  -2.6211786e+01   0.0000000e+00  -2.1942875e+01   5.7194423e+01  -5.5422869e+01
   1.7581028e+01  -2.6336047e+01   0.0000000e+00   3.5231827e+01   2.2852816e+01  -6.8131829e+01
   1.7621791e+01  -2.6459334e+01   0.0000000e+00  -3.6058316e+01   3.2045479e+00  -1.5890750e+02
   1.7666444e+01  -2.6581549e+01   0.0000000e+00  -1.2177968e+02  -2.7292193e+00  -8.4444465e+01
   1.7714966e+01  -2.6702594e+01   0.0000000e+00  -8.6872292e+01  -5.1722979e+01  -3.9970190e+00
   1.7767330e+01  -2.6822373e+01   0.0000000e+00  -1.0550265e+02  -8.4390268e+01  -4.7297555e+00
[truncated: 3,642,157 more chars]
