# Supplementary material for: A high-resolution lithospheric magnetic field model over southern Africa based on a joint inversion of CHAMP, Swarm, WDMAM, and ground magnetic field data
Source: Copernicus journal article supplement (doi:10.5194/se-9-897-2018), 2018-07-16
Supplement: Supplementary file 1 [file se-9-897-2018-supplement.zip › SupplementaryMaterial/ModelSA50km.txt]

   2.2500005e+01  -2.4999991e+01   5.0000000e+01   1.5560280e+01  -2.9304063e+01  -2.6191943e+01
   2.2566483e+01  -2.5124977e+01   5.0000000e+01   1.0259383e+01  -3.2015268e+01  -3.0936315e+01
   2.2649272e+01  -2.5030796e+01   5.0000000e+01   1.5267962e+01  -3.3913461e+01  -3.7220970e+01
   2.2619593e+01  -2.4913455e+01   5.0000000e+01   2.0614372e+01  -3.1744842e+01  -3.1780593e+01
   2.2500000e+01  -2.4861269e+01   5.0000000e+01   2.0639932e+01  -2.7375232e+01  -2.3353249e+01
   2.2380407e+01  -2.4913455e+01   5.0000000e+01   1.7393548e+01  -2.3568933e+01  -1.9304161e+01
   2.2350728e+01  -2.5030796e+01   5.0000000e+01   1.3759789e+01  -2.3225439e+01  -1.8710640e+01
   2.2433517e+01  -2.5124977e+01   5.0000000e+01   1.0849225e+01  -2.6801067e+01  -2.2028944e+01
   2.2791110e+01  -2.5050403e+01   5.0000000e+01   1.4896970e+01  -3.5428713e+01  -5.0165692e+01
   2.2783469e+01  -2.4922052e+01   5.0000000e+01   2.2405826e+01  -3.4303972e+01  -4.3902988e+01
   2.2711005e+01  -2.4811602e+01   5.0000000e+01   2.5548173e+01  -3.1819563e+01  -3.2756060e+01
   2.2590406e+01  -2.4744279e+01   5.0000000e+01   2.4961290e+01  -2.7857617e+01  -2.3153019e+01
   2.2449214e+01  -2.4735429e+01   5.0000000e+01   2.2588488e+01  -2.3227707e+01  -1.7629195e+01
   2.2319588e+01  -2.4787069e+01   5.0000000e+01   1.9622350e+01  -1.9021425e+01  -1.5824251e+01
   2.2231095e+01  -2.4887431e+01   5.0000000e+01   1.6302113e+01  -1.6738604e+01  -1.5546220e+01
   2.2204049e+01  -2.5013608e+01   5.0000000e+01   1.3892414e+01  -1.6552151e+01  -1.4724983e+01
   2.2244821e+01  -2.5136726e+01   5.0000000e+01   1.2236943e+01  -1.7723436e+01  -1.4310347e+01
   2.2344231e+01  -2.5228534e+01   5.0000000e+01   9.9263644e+00  -2.1176112e+01  -1.6007069e+01
   2.2479512e+01  -2.5267912e+01   5.0000000e+01   7.1031195e+00  -2.6911619e+01  -2.1838297e+01
   2.2619515e+01  -2.5245788e+01   5.0000000e+01   5.1805836e+00  -3.2373875e+01  -3.2736060e+01
   2.2731985e+01  -2.5167260e+01   5.0000000e+01   7.3099251e+00  -3.5190628e+01  -4.5088810e+01
   2.2627648e+01  -2.4622121e+01   5.0000000e+01   2.6384827e+01  -2.6433344e+01  -1.9387148e+01
   2.2485785e+01  -2.4604968e+01   5.0000000e+01   2.4038278e+01  -2.2111750e+01  -1.4860015e+01
   2.2345448e+01  -2.4630489e+01   5.0000000e+01   2.2134423e+01  -1.7693418e+01  -1.3272677e+01
   2.2221716e+01  -2.4695945e+01   5.0000000e+01   1.9977174e+01  -1.3661280e+01  -1.4262462e+01
   2.2127926e+01  -2.4794296e+01   5.0000000e+01   1.6910691e+01  -1.1568705e+01  -1.5960851e+01
   2.2074261e+01  -2.4914949e+01   5.0000000e+01   1.4407841e+01  -1.1349963e+01  -1.5573304e+01
   2.2066638e+01  -2.5044874e+01   5.0000000e+01   1.4044423e+01  -1.1255330e+01  -1.3708952e+01
   2.2106024e+01  -2.5169999e+01   5.0000000e+01   1.4400551e+01  -1.0874152e+01  -1.2356604e+01
   2.2188274e+01  -2.5276731e+01   5.0000000e+01   1.3434543e+01  -1.1918313e+01  -1.1836223e+01
   2.2304526e+01  -2.5353443e+01   5.0000000e+01   1.1154108e+01  -1.5988118e+01  -1.2825702e+01
   2.2442139e+01  -2.5391760e+01   5.0000000e+01   8.2615629e+00  -2.2224185e+01  -1.7056489e+01
   2.2586081e+01  -2.5387492e+01   5.0000000e+01   4.8842688e+00  -2.8309888e+01  -2.5728965e+01
   2.2720608e+01  -2.5341106e+01   5.0000000e+01   1.6679144e+00  -3.2256002e+01  -3.8535513e+01
   2.2831035e+01  -2.5257672e+01   5.0000000e+01   1.5070608e+00  -3.3571763e+01  -5.3002083e+01
   2.2905370e+01  -2.5146297e+01   5.0000000e+01   7.4252582e+00  -3.3070875e+01  -6.3359810e+01
   2.2935626e+01  -2.5019107e+01   5.0000000e+01   1.7152268e+01  -3.2884994e+01  -6.3082712e+01
   2.2918657e+01  -2.4889911e+01   5.0000000e+01   2.4805384e+01  -3.3449147e+01  -5.3075313e+01
   2.2856438e+01  -2.4772694e+01   5.0000000e+01   2.8277138e+01  -3.3005237e+01  -3.9827520e+01
   2.2755800e+01  -2.4680108e+01   5.0000000e+01   2.8410746e+01  -3.0447261e+01  -2.7761770e+01
   2.2005477e+01  -2.4730152e+01   5.0000000e+01   1.7166057e+01  -8.4813280e+00  -1.9351240e+01
   2.1948449e+01  -2.4845263e+01   5.0000000e+01   1.4402674e+01  -9.3207596e+00  -1.9183269e+01
   2.1923356e+01  -2.4969413e+01   5.0000000e+01   1.4191381e+01  -9.4728478e+00  -1.6820192e+01
   2.1931748e+01  -2.5095402e+01   5.0000000e+01   1.6373362e+01  -8.0039710e+00  -1.4948453e+01
   2.1973238e+01  -2.5215904e+01   5.0000000e+01   1.8524557e+01  -5.4158582e+00  -1.4370795e+01
   2.2045499e+01  -2.5323890e+01   5.0000000e+01   1.8582627e+01  -3.6197445e+00  -1.3781489e+01
   2.2144380e+01  -2.5413044e+01   5.0000000e+01   1.6721753e+01  -4.9901444e+00  -1.2558188e+01
   2.2264136e+01  -2.5478137e+01   5.0000000e+01   1.4315379e+01  -9.9670929e+00  -1.2352579e+01
   2.2397759e+01  -2.5515346e+01   5.0000000e+01   1.1957433e+01  -1.6783804e+01  -1.5013241e+01
   2.2537398e+01  -2.5522483e+01   5.0000000e+01   9.2081184e+00  -2.3217089e+01  -2.1351548e+01
   2.2674836e+01  -2.5499126e+01   5.0000000e+01   5.2678252e+00  -2.7473580e+01  -3.1115429e+01
   2.2801990e+01  -2.5446650e+01   5.0000000e+01   3.8534271e-01  -2.9165312e+01  -4.3397095e+01
   2.2911403e+01  -2.5368141e+01   5.0000000e+01  -3.0380998e+00  -2.8828864e+01  -5.7534116e+01
   2.2996693e+01  -2.5268206e+01   5.0000000e+01  -1.6951108e+00  -2.6338171e+01  -7.1066322e+01
   2.3052932e+01  -2.5152698e+01   5.0000000e+01   4.9594049e+00  -2.3593592e+01  -7.8653258e+01
   2.3076921e+01  -2.5028363e+01   5.0000000e+01   1.4533062e+01  -2.4291856e+01  -7.7010805e+01
   2.3067361e+01  -2.4902443e+01   5.0000000e+01   2.3163115e+01  -2.7891796e+01  -6.7249448e+01
   2.3024906e+01  -2.4782247e+01   5.0000000e+01   2.8333824e+01  -3.1267440e+01  -5.3853381e+01
   2.2952106e+01  -2.4674736e+01   5.0000000e+01   3.0471498e+01  -3.2448412e+01  -4.0029207e+01
   2.2853234e+01  -2.4586117e+01   5.0000000e+01   2.9799571e+01  -3.0729309e+01  -2.7824191e+01
   2.2734035e+01  -2.4521494e+01   5.0000000e+01   2.7365276e+01  -2.7175916e+01  -1.9450161e+01
   2.2601387e+01  -2.4484584e+01   5.0000000e+01   2.4961326e+01  -2.3378652e+01  -1.4735946e+01
   2.2462919e+01  -2.4477508e+01   5.0000000e+01   2.3336597e+01  -1.9769526e+01  -1.2209775e+01
   2.2326579e+01  -2.4500672e+01   5.0000000e+01   2.2470487e+01  -1.5928035e+01  -1.1281926e+01
   2.2200199e+01  -2.4552745e+01   5.0000000e+01   2.1812603e+01  -1.1803483e+01  -1.2683717e+01
   2.2091059e+01  -2.4630734e+01   5.0000000e+01   2.0200494e+01  -8.9301658e+00  -1.6324840e+01
   2.1844868e+01  -2.5273528e+01   5.0000000e+01   2.4390986e+01  -3.1281048e+00  -2.0428312e+01
   2.1916247e+01  -2.5384116e+01   5.0000000e+01   2.4509802e+01   1.8570419e+00  -2.1722209e+01
   2.2010268e+01  -2.5479941e+01   5.0000000e+01   2.1995143e+01   3.8928020e+00  -1.9834235e+01
   2.2123330e+01  -2.5557281e+01   5.0000000e+01   1.8985547e+01   9.3592590e-01  -1.6565215e+01
   2.2251066e+01  -2.5613127e+01   5.0000000e+01   1.6710425e+01  -5.8215839e+00  -1.5297979e+01
   2.2388512e+01  -2.5645302e+01   5.0000000e+01   1.5060577e+01  -1.3705767e+01  -1.7726211e+01
   2.2530311e+01  -2.5652548e+01   5.0000000e+01   1.3127079e+01  -2.0209924e+01  -2.4005207e+01
   2.2670926e+01  -2.5634584e+01   5.0000000e+01   9.6794414e+00  -2.3511434e+01  -3.3007894e+01
   2.2804870e+01  -2.5592111e+01   5.0000000e+01   4.0556126e+00  -2.3576156e+01  -4.3289002e+01
   2.2926927e+01  -2.5526786e+01   5.0000000e+01  -2.7871971e+00  -2.1968061e+01  -5.4948482e+01
   2.3032366e+01  -2.5441153e+01   5.0000000e+01  -7.5103012e+00  -1.8910667e+01  -6.8867246e+01
   2.3117126e+01  -2.5338544e+01   5.0000000e+01  -6.8889593e+00  -1.2709794e+01  -8.1637249e+01
   2.3177977e+01  -2.5222939e+01   5.0000000e+01  -2.4198430e+00  -6.1408593e+00  -8.7695944e+01
   2.3212635e+01  -2.5098809e+01   5.0000000e+01   4.2066059e+00  -5.7216798e+00  -8.7561406e+01
   2.3219844e+01  -2.4970944e+01   5.0000000e+01   1.3573370e+01  -1.2041899e+01  -8.2304548e+01
   2.3199412e+01  -2.4844261e+01   5.0000000e+01   2.2465213e+01  -2.0283365e+01  -7.1886575e+01
   2.3152206e+01  -2.4723616e+01   5.0000000e+01   2.8314202e+01  -2.6929568e+01  -5.9106321e+01
   2.3080104e+01  -2.4613620e+01   5.0000000e+01   3.1341896e+01  -3.0714092e+01  -4.5476717e+01
   2.2985914e+01  -2.4518468e+01   5.0000000e+01   3.1179861e+01  -3.1009538e+01  -3.2406678e+01
   2.2873265e+01  -2.4441779e+01   5.0000000e+01   2.8746606e+01  -2.8520692e+01  -2.2673495e+01
   2.2746461e+01  -2.4386462e+01   5.0000000e+01   2.6154385e+01  -2.5103605e+01  -1.6948226e+01
   2.2610323e+01  -2.4354616e+01   5.0000000e+01   2.4308238e+01  -2.1857335e+01  -1.3720494e+01
   2.2470010e+01  -2.4347446e+01   5.0000000e+01   2.3073124e+01  -1.8845324e+01  -1.1730577e+01
   2.2330831e+01  -2.4365223e+01   5.0000000e+01   2.2462315e+01  -1.5661123e+01  -1.0598025e+01
   2.2198056e+01  -2.4407274e+01   5.0000000e+01   2.2580231e+01  -1.1866551e+01  -1.1208722e+01
   2.2076722e+01  -2.4472006e+01   5.0000000e+01   2.2739377e+01  -8.5620513e+00  -1.4688379e+01
   2.1971451e+01  -2.4556965e+01   5.0000000e+01   2.1538686e+01  -7.5346915e+00  -1.9649342e+01
   2.1886278e+01  -2.4658924e+01   5.0000000e+01   1.8407447e+01  -8.7845458e+00  -2.2860034e+01
   2.1824496e+01  -2.4774000e+01   5.0000000e+01   1.4992007e+01  -1.0732527e+01  -2.2388088e+01
   2.1788530e+01  -2.4897801e+01   5.0000000e+01   1.4089029e+01  -1.1765051e+01  -1.9515389e+01
   2.1779836e+01  -2.5025590e+01   5.0000000e+01   1.6699547e+01  -1.0963512e+01  -1.7416185e+01
   2.1798831e+01  -2.5152461e+01   5.0000000e+01   2.1108287e+01  -7.9737503e+00  -1.8005874e+01
   2.2206112e+01  -2.5734817e+01   5.0000000e+01   1.7653338e+01  -1.1196887e+00  -2.0362384e+01
   2.2344390e+01  -2.5768576e+01   5.0000000e+01   1.6733256e+01  -9.8499762e+00  -2.1957778e+01
   2.2486994e+01  -2.5781239e+01   5.0000000e+01   1.5872622e+01  -1.6846103e+01  -2.7828047e+01
   2.2629959e+01  -2.5772455e+01   5.0000000e+01   1.3938918e+01  -1.9983567e+01  -3.6340401e+01
   2.2769312e+01  -2.5742469e+01   5.0000000e+01   9.8924760e+00  -1.8618574e+01  -4.5169979e+01
   2.2901183e+01  -2.5692114e+01   5.0000000e+01   2.8728875e+00  -1.4245543e+01  -5.3175882e+01
   2.3021922e+01  -2.5622788e+01   5.0000000e+01  -6.2845800e+00  -9.2372919e+00  -6.2240379e+01
   2.3128207e+01  -2.5536414e+01   5.0000000e+01  -1.3435313e+01  -3.2800254e+00  -7.4803440e+01
   2.3217130e+01  -2.5435380e+01   5.0000000e+01  -1.3799414e+01   6.3002310e+00  -8.6615417e+01
   2.3286284e+01  -2.5322476e+01   5.0000000e+01  -9.9449175e+00   1.6848059e+01  -8.9178896e+01
   2.3333824e+01  -2.5200810e+01   5.0000000e+01  -7.7952308e+00   1.9955748e+01  -8.5398433e+01
   2.3358512e+01  -2.5073722e+01   5.0000000e+01  -3.8276231e+00   1.2892356e+01  -8.3785242e+01
   2.3359744e+01  -2.4944688e+01   5.0000000e+01   6.0685611e+00   6.5691593e-01  -8.1832660e+01
   2.3337560e+01  -2.4817228e+01   5.0000000e+01   1.7118851e+01  -1.1227782e+01  -7.5091626e+01
   2.3292633e+01  -2.4694808e+01   5.0000000e+01   2.5402005e+01  -2.0358584e+01  -6.5146474e+01
   2.3226246e+01  -2.4580748e+01   5.0000000e+01   3.0783441e+01  -2.6412999e+01  -5.3218897e+01
   2.3140249e+01  -2.4478131e+01   5.0000000e+01   3.2567471e+01  -2.9232351e+01  -4.0232433e+01
   2.3037005e+01  -2.4389725e+01   5.0000000e+01   3.1144041e+01  -2.8965045e+01  -2.8979448e+01
   2.2919326e+01  -2.4317909e+01   5.0000000e+01   2.8713926e+01  -2.6739436e+01  -2.1333117e+01
   2.2790392e+01  -2.4264612e+01   5.0000000e+01   2.6854473e+01  -2.3956924e+01  -1.6812094e+01
   2.2653675e+01  -2.4231265e+01   5.0000000e+01   2.5601660e+01  -2.1209099e+01  -1.4107744e+01
   2.2512842e+01  -2.4218760e+01   5.0000000e+01   2.4445054e+01  -1.8580735e+01  -1.2487473e+01
   2.2371665e+01  -2.4227433e+01   5.0000000e+01   2.3357399e+01  -1.6127773e+01  -1.1496173e+01
   2.2233924e+01  -2.4257052e+01   5.0000000e+01   2.2927622e+01  -1.3394504e+01  -1.1173144e+01
   2.2103315e+01  -2.4306822e+01   5.0000000e+01   2.3544218e+01  -1.0408429e+01  -1.2738145e+01
   2.1983349e+01  -2.4375409e+01   5.0000000e+01   2.4397045e+01  -8.5451128e+00  -1.6595270e+01
   2.1877268e+01  -2.4460971e+01   5.0000000e+01   2.3895172e+01  -8.6440034e+00  -2.1035995e+01
   2.1787954e+01  -2.4561206e+01   5.0000000e+01   2.1086567e+01  -1.0121773e+01  -2.3840167e+01
   2.1717858e+01  -2.4673412e+01   5.0000000e+01   1.6822975e+01  -1.2056747e+01  -2.3516819e+01
   2.1668928e+01  -2.4794557e+01   5.0000000e+01   1.3820407e+01  -1.3817644e+01  -2.0304804e+01
   2.1642551e+01  -2.4921357e+01   5.0000000e+01   1.4549227e+01  -1.4956503e+01  -1.6750214e+01
   2.1639516e+01  -2.5050367e+01   5.0000000e+01   1.9050571e+01  -1.4854625e+01  -1.6006885e+01
   2.1659977e+01  -2.5178069e+01   5.0000000e+01   2.5115159e+01  -1.2608226e+01  -1.9560387e+01
   2.1703447e+01  -2.5300971e+01   5.0000000e+01   2.9638755e+01  -7.5707907e+00  -2.6220208e+01
   2.1768802e+01  -2.5415702e+01   5.0000000e+01   3.0333712e+01  -2.4897775e-01  -3.2213664e+01
   2.1854304e+01  -2.5519106e+01   5.0000000e+01   2.7353720e+01   6.8789828e+00  -3.3345825e+01
   2.1957642e+01  -2.5608328e+01   5.0000000e+01   2.3039191e+01   9.8221205e+00  -2.8996328e+01
   2.2075997e+01  -2.5680903e+01   5.0000000e+01   1.9606046e+01   6.5168328e+00  -2.3237728e+01
   2.2817160e+01  -2.5862456e+01   5.0000000e+01   1.0944193e+01  -1.2203949e+01  -5.5793431e+01
   2.2950195e+01  -2.5812714e+01   5.0000000e+01   4.6533324e+00  -3.3811457e+00  -6.0062398e+01
   2.3073880e+01  -2.5746332e+01   5.0000000e+01  -5.5925616e+00   5.8419309e+00  -6.2811207e+01
   2.3185665e+01  -2.5664687e+01   5.0000000e+01  -1.6876065e+01   1.4716624e+01  -6.8804732e+01
   2.3283263e+01  -2.5569471e+01   5.0000000e+01  -2.2770839e+01   2.5861585e+01  -7.8301762e+01
   2.3364693e+01  -2.5462651e+01   5.0000000e+01  -2.0306168e+01   3.9233544e+01  -8.2107694e+01
   2.3428322e+01  -2.5346430e+01   5.0000000e+01  -1.7224341e+01   4.6795381e+01  -7.4526123e+01
   2.3472896e+01  -2.5223196e+01   5.0000000e+01  -1.9559278e+01   4.1855666e+01  -6.6968360e+01
   2.3497562e+01  -2.5095476e+01   5.0000000e+01  -1.9344207e+01   2.7957076e+01  -6.9864004e+01
   2.3501877e+01  -2.4965878e+01   5.0000000e+01  -9.4584530e+00   1.2138582e+01  -7.6360447e+01
   2.3485818e+01  -2.4837042e+01   5.0000000e+01   4.9682212e+00  -1.6213919e+00  -7.7112052e+01
   2.3449774e+01  -2.4711583e+01   5.0000000e+01   1.7404727e+01  -1.2071002e+01  -7.2000339e+01
   2.3394533e+01  -2.4592042e+01   5.0000000e+01   2.6639855e+01  -1.9526232e+01  -6.3157227e+01
   2.3321262e+01  -2.4480829e+01   5.0000000e+01   3.2093596e+01  -2.4445485e+01  -5.1393342e+01
   2.3231482e+01  -2.4380185e+01   5.0000000e+01   3.3262247e+01  -2.6920300e+01  -3.9100699e+01
   2.3127031e+01  -2.4292130e+01   5.0000000e+01   3.1812323e+01  -2.7200309e+01  -2.8918969e+01
   2.3010031e+01  -2.4218429e+01   5.0000000e+01   2.9970763e+01  -2.5934833e+01  -2.1730634e+01
   2.2882839e+01  -2.4160555e+01   5.0000000e+01   2.8903250e+01  -2.3954740e+01  -1.7060761e+01
   2.2748007e+01  -2.4119665e+01   5.0000000e+01   2.8531538e+01  -2.1635029e+01  -1.4067068e+01
   2.2608231e+01  -2.4096575e+01   5.0000000e+01   2.8109917e+01  -1.9045377e+01  -1.2401389e+01
   2.2466298e+01  -2.4091744e+01   5.0000000e+01   2.7104619e+01  -1.6617931e+01  -1.1955249e+01
   2.2325037e+01  -2.4105269e+01   5.0000000e+01   2.5697155e+01  -1.4748688e+01  -1.2132860e+01
   2.2187263e+01  -2.4136881e+01   5.0000000e+01   2.4803100e+01  -1.3124107e+01  -1.2636403e+01
   2.2055726e+01  -2.4185949e+01   5.0000000e+01   2.5286227e+01  -1.1675140e+01  -1.4108307e+01
   2.1933060e+01  -2.4251493e+01   5.0000000e+01   2.6644436e+01  -1.0902201e+01  -1.6786487e+01
   2.1821731e+01  -2.4332204e+01   5.0000000e+01   2.7211348e+01  -1.0860705e+01  -1.9903193e+01
   2.1723990e+01  -2.4426466e+01   5.0000000e+01   2.5652430e+01  -1.1114632e+01  -2.2543587e+01
   2.1641829e+01  -2.4532388e+01   5.0000000e+01   2.1631181e+01  -1.1465017e+01  -2.3758528e+01
   2.1576941e+01  -2.4647842e+01   5.0000000e+01   1.6291450e+01  -1.2125861e+01  -2.2338134e+01
   2.1530681e+01  -2.4770499e+01   5.0000000e+01   1.2423277e+01  -1.3429106e+01  -1.8131856e+01
   2.1504041e+01  -2.4897882e+01   5.0000000e+01   1.2679711e+01  -1.5424770e+01  -1.3331931e+01
   2.1497622e+01  -2.5027408e+01   5.0000000e+01   1.7456760e+01  -1.7545376e+01  -1.1335836e+01
   2.1511616e+01  -2.5156444e+01   5.0000000e+01   2.4845005e+01  -1.8545413e+01  -1.4601044e+01
   2.1545804e+01  -2.5282358e+01   5.0000000e+01   3.1627384e+01  -1.6922263e+01  -2.3300059e+01
   2.1599547e+01  -2.5402574e+01   5.0000000e+01   3.4832486e+01  -1.1692418e+01  -3.4617087e+01
   2.1671799e+01  -2.5514624e+01   5.0000000e+01   3.3490252e+01  -3.0308764e+00  -4.3778143e+01
   2.1761122e+01  -2.5616202e+01   5.0000000e+01   2.8820946e+01   6.8374509e+00  -4.6463665e+01
   2.1865716e+01  -2.5705211e+01   5.0000000e+01   2.3204715e+01   1.3314902e+01  -4.1705979e+01
   2.1983447e+01  -2.5779810e+01   5.0000000e+01   1.8793594e+01   1.2634345e+01  -3.3527148e+01
   2.2111897e+01  -2.5838451e+01   5.0000000e+01   1.6395113e+01   5.7223447e+00  -2.7547796e+01
   2.2248414e+01  -2.5879917e+01   5.0000000e+01   1.5641688e+01  -3.6807572e+00  -2.6548835e+01
   2.2390166e+01  -2.5903346e+01   5.0000000e+01   1.5619498e+01  -1.2171879e+01  -3.0714845e+01
   2.2534204e+01  -2.5908248e+01   5.0000000e+01   1.5262592e+01  -1.7224927e+01  -3.8623841e+01
   2.2677529e+01  -2.5894523e+01   5.0000000e+01   1.3943492e+01  -1.7404433e+01  -4.7947181e+01
   2.3395327e+01  -2.5648315e+01   5.0000000e+01  -2.7060587e+01   5.0331915e+01  -5.8620234e+01
   2.3476438e+01  -2.5543687e+01   5.0000000e+01  -2.6686929e+01   6.3009167e+01  -5.6414089e+01
   2.3542550e+01  -2.5430832e+01   5.0000000e+01  -2.5800500e+01   6.8044908e+01  -4.6166626e+01
   2.3592694e+01  -2.5311479e+01   5.0000000e+01  -3.1458846e+01   5.9563287e+01  -3.7975238e+01
   2.3626151e+01  -2.5187454e+01   5.0000000e+01  -3.7904297e+01   4.2292022e+01  -4.3897564e+01
   2.3642464e+01  -2.5060648e+01   5.0000000e+01  -3.4250663e+01   2.4516679e+01  -6.0215519e+01
   2.3641438e+01  -2.4932989e+01   5.0000000e+01  -1.9691925e+01   9.8774300e+00  -7.3901169e+01
   2.3623142e+01  -2.4806410e+01   5.0000000e+01  -1.9912788e+00  -1.2398371e+00  -7.8426576e+01
   2.3587905e+01  -2.4682823e+01   5.0000000e+01   1.3107639e+01  -9.1826836e+00  -7.5589614e+01
   2.3536306e+01  -2.4564089e+01   5.0000000e+01   2.4441096e+01  -1.5049135e+01  -6.8011353e+01
   2.3469165e+01  -2.4451993e+01   5.0000000e+01   3.1393581e+01  -1.9659997e+01  -5.6981565e+01
   2.3387527e+01  -2.4348212e+01   5.0000000e+01   3.3623635e+01  -2.3005089e+01  -4.5013340e+01
   2.3292645e+01  -2.4254297e+01   5.0000000e+01   3.2884335e+01  -2.5007227e+01  -3.4579868e+01
   2.3185961e+01  -2.4171648e+01   5.0000000e+01   3.1357163e+01  -2.5658768e+01  -2.6310253e+01
   2.3069082e+01  -2.4101496e+01   5.0000000e+01   3.0285033e+01  -2.5237438e+01  -2.0066322e+01
   2.2943759e+01  -2.4044881e+01   5.0000000e+01   3.0252844e+01  -2.4157828e+01  -1.5357625e+01
   2.2811860e+01  -2.4002644e+01   5.0000000e+01   3.1052000e+01  -2.2375584e+01  -1.1711103e+01
   2.2675344e+01  -2.3975411e+01   5.0000000e+01   3.1871832e+01  -1.9767214e+01  -9.3423265e+00
   2.2536233e+01  -2.3963584e+01   5.0000000e+01   3.1936461e+01  -1.6828985e+01  -8.7798335e+00
   2.2396586e+01  -2.3967339e+01   5.0000000e+01   3.0943528e+01  -1.4553615e+01  -9.8897650e+00
   2.2258470e+01  -2.3986621e+01   5.0000000e+01   2.9288945e+01  -1.3488381e+01  -1.1767668e+01
   2.2123927e+01  -2.4021143e+01   5.0000000e+01   2.8094883e+01  -1.3558145e+01  -1.3606807e+01
   2.1994955e+01  -2.4070395e+01   5.0000000e+01   2.8463491e+01  -1.4305772e+01  -1.4989069e+01
   2.1873472e+01  -2.4133646e+01   5.0000000e+01   3.0096791e+01  -1.4796405e+01  -1.6137894e+01
   2.1761292e+01  -2.4209958e+01   5.0000000e+01   3.1343462e+01  -1.4411115e+01  -1.7738118e+01
   2.1660100e+01  -2.4298196e+01   5.0000000e+01   3.0842225e+01  -1.3315417e+01  -2.0008872e+01
   2.1571427e+01  -2.4397046e+01   5.0000000e+01   2.8088826e+01  -1.1897112e+01  -2.2509494e+01
   2.1496626e+01  -2.4505033e+01   5.0000000e+01   2.2951824e+01  -1.0546397e+01  -2.4139240e+01
   2.1436852e+01  -2.4620542e+01   5.0000000e+01   1.6302761e+01  -9.8405565e+00  -2.3187421e+01
   2.1393044e+01  -2.4741841e+01   5.0000000e+01   1.0747093e+01  -1.0405173e+01  -1.8737498e+01
   2.1365907e+01  -2.4867105e+01   5.0000000e+01   9.2484816e+00  -1.2532180e+01  -1.2321834e+01
   2.1355902e+01  -2.4994445e+01   5.0000000e+01   1.2897947e+01  -1.5941634e+01  -7.3328830e+00
   2.1363232e+01  -2.5121935e+01   5.0000000e+01   2.0508448e+01  -1.9694098e+01  -7.0583009e+00
   2.1387842e+01  -2.5247641e+01   5.0000000e+01   2.9234609e+01  -2.2299642e+01  -1.3350119e+01
   2.1429408e+01  -2.5369649e+01   5.0000000e+01   3.5630696e+01  -2.2173284e+01  -2.5329065e+01
   2.1487346e+01  -2.5486095e+01   5.0000000e+01   3.7680495e+01  -1.8167907e+01  -3.9511664e+01
   2.1560817e+01  -2.5595198e+01   5.0000000e+01   3.5444714e+01  -9.9658853e+00  -5.1761080e+01
   2.1648732e+01  -2.5695281e+01   5.0000000e+01   3.0050986e+01   1.2905340e+00  -5.8353336e+01
   2.1749773e+01  -2.5784802e+01   5.0000000e+01   2.3127447e+01   1.1934344e+01  -5.6715744e+01
   2.1862409e+01  -2.5862380e+01   5.0000000e+01   1.6859992e+01   1.6689278e+01  -4.8088121e+01
   2.1984918e+01  -2.5926814e+01   5.0000000e+01   1.2944109e+01   1.3366904e+01  -3.8252944e+01
   2.2115417e+01  -2.5977106e+01   5.0000000e+01   1.1425498e+01   4.7630690e+00  -3.2588503e+01
   2.2251889e+01  -2.6012474e+01   5.0000000e+01   1.1395614e+01  -5.0534631e+00  -3.2877329e+01
   2.2392219e+01  -2.6032368e+01   5.0000000e+01   1.1826945e+01  -1.2846623e+01  -3.8511268e+01
   2.2534225e+01  -2.6036480e+01   5.0000000e+01   1.1796759e+01  -1.6591347e+01  -4.7402942e+01
   2.2675699e+01  -2.6024745e+01   5.0000000e+01   1.1000371e+01  -1.5554843e+01  -5.7421820e+01
   2.2814440e+01  -2.5997346e+01   5.0000000e+01   9.6996835e+00  -8.8647405e+00  -6.5991451e+01
   2.2948295e+01  -2.5954709e+01   5.0000000e+01   7.1648568e+00   2.9109105e+00  -6.9091898e+01
   2.3075191e+01  -2.5897496e+01   5.0000000e+01   1.2171463e+00   1.6178774e+01  -6.5565610e+01
   2.3193172e+01  -2.5826595e+01   5.0000000e+01  -8.9124092e+00   2.7784040e+01  -5.9757334e+01
   2.3300428e+01  -2.5743104e+01   5.0000000e+01  -2.0254682e+01   3.8232163e+01  -5.7278986e+01
   2.3766996e+01  -2.5206421e+01   5.0000000e+01  -5.5274125e+01   3.7357038e+01  -2.5290340e+01
   2.3783719e+01  -2.5078890e+01   5.0000000e+01  -5.0794095e+01   2.2003267e+01  -5.2732212e+01
   2.3784834e+01  -2.4950467e+01   5.0000000e+01  -3.4035889e+01   1.0365741e+01  -7.4113079e+01
   2.3770378e+01  -2.4822711e+01   5.0000000e+01  -1.2800554e+01   1.6024999e+00  -8.3492461e+01
   2.3740574e+01  -2.4697168e+01   5.0000000e+01   6.2565258e+00  -4.4586489e+00  -8.2509876e+01
   2.3695825e+01  -2.4575353e+01   5.0000000e+01   2.0524590e+01  -8.6803395e+00  -7.5275718e+01
   2.3636712e+01  -2.4458730e+01   5.0000000e+01   2.9576607e+01  -1.2522927e+01  -6.4586018e+01
   2.3563983e+01  -2.4348698e+01   5.0000000e+01   3.3372832e+01  -1.6375753e+01  -5.2742467e+01
   2.3478542e+01  -2.4246574e+01   5.0000000e+01   3.3422039e+01  -1.9828868e+01  -4.2194629e+01
   2.3381437e+01  -2.4153577e+01   5.0000000e+01   3.2195376e+01  -2.2548905e+01  -3.3531389e+01
   2.3273847e+01  -2.4070813e+01   5.0000000e+01   3.0926862e+01  -2.4236284e+01  -2.6164589e+01
   2.3157070e+01  -2.3999268e+01   5.0000000e+01   3.0170807e+01  -2.5031381e+01  -1.9970215e+01
   2.3032504e+01  -2.3939789e+01   5.0000000e+01   3.0499399e+01  -2.5257839e+01  -1.4558759e+01
   2.2901635e+01  -2.3893081e+01   5.0000000e+01   3.1867189e+01  -2.4592065e+01  -9.4285068e+00
   2.2766016e+01  -2.3859698e+01   5.0000000e+01   3.3613136e+01  -2.2467341e+01  -5.0082508e+00
   2.2627254e+01  -2.3840034e+01   5.0000000e+01   3.4949851e+01  -1.9015594e+01  -2.4629853e+00
   2.2486990e+01  -2.3834322e+01   5.0000000e+01   3.5281707e+01  -1.5360116e+01  -2.6651875e+00
   2.2346878e+01  -2.3842629e+01   5.0000000e+01   3.4446343e+01  -1.2962754e+01  -5.3187056e+00
   2.2208576e+01  -2.3864856e+01   5.0000000e+01   3.2892625e+01  -1.2741609e+01  -9.1886966e+00
   2.2073717e+01  -2.3900742e+01   5.0000000e+01   3.1713192e+01  -1.4907515e+01  -1.2472956e+01
   2.1943900e+01  -2.3949862e+01   5.0000000e+01   3.2100413e+01  -1.8082975e+01  -1.3485503e+01
   2.1820668e+01  -2.4011634e+01   5.0000000e+01   3.4075692e+01  -1.9704466e+01  -1.2853050e+01
   2.1705490e+01  -2.4085325e+01   5.0000000e+01   3.6130103e+01  -1.8863299e+01  -1.3053191e+01
   2.1599747e+01  -2.4170063e+01   5.0000000e+01   3.6702564e+01  -1.6749364e+01  -1.5215289e+01
   2.1504717e+01  -2.4264838e+01   5.0000000e+01   3.5353967e+01  -1.4380056e+01  -1.8668545e+01
   2.1421556e+01  -2.4368522e+01   5.0000000e+01   3.1925451e+01  -1.1853572e+01  -2.2626247e+01
   2.1351286e+01  -2.4479876e+01   5.0000000e+01   2.5870162e+01  -9.3846091e+00  -2.5969932e+01
   2.1294783e+01  -2.4597569e+01   5.0000000e+01   1.7629657e+01  -7.6634215e+00  -2.6494830e+01
   2.1252763e+01  -2.4720187e+01   5.0000000e+01   9.8407499e+00  -7.3816932e+00  -2.2446795e+01
   2.1225776e+01  -2.4846255e+01   5.0000000e+01   5.9883412e+00  -8.9257648e+00  -1.4765976e+01
   2.1214194e+01  -2.4974252e+01   5.0000000e+01   7.8775599e+00  -1.2280253e+01  -6.8482806e+00
   2.1218203e+01  -2.5102628e+01   5.0000000e+01   1.4919171e+01  -1.6923897e+01  -2.5591499e+00
   2.1237805e+01  -2.5229823e+01   5.0000000e+01   2.4599935e+01  -2.1838384e+01  -4.8825662e+00
   2.1272810e+01  -2.5354289e+01   5.0000000e+01   3.3257661e+01  -2.5579423e+01  -1.4419102e+01
   2.1322835e+01  -2.5474505e+01   5.0000000e+01   3.8173492e+01  -2.6497938e+01  -2.8847470e+01
   2.1387313e+01  -2.5588997e+01   5.0000000e+01   3.8648029e+01  -2.3320182e+01  -4.4735332e+01
   2.1465492e+01  -2.5696358e+01   5.0000000e+01   3.5126614e+01  -1.5669990e+01  -5.8921655e+01
   2.1556443e+01  -2.5795263e+01   5.0000000e+01   2.8371072e+01  -4.1537703e+00  -6.8227116e+01
   2.1659074e+01  -2.5884489e+01   5.0000000e+01   1.9645998e+01   8.5643620e+00  -6.9059931e+01
   2.1772138e+01  -2.5962932e+01   5.0000000e+01   1.1550509e+01   1.6940186e+01  -6.0553866e+01
   2.1894251e+01  -2.6029616e+01   5.0000000e+01   6.5579642e+00   1.6761352e+01  -4.8056296e+01
   2.2023907e+01  -2.6083711e+01   5.0000000e+01   4.7282141e+00   9.4919438e+00  -3.8771820e+01
   2.2159501e+01  -2.6124543e+01   5.0000000e+01   4.6149215e+00  -5.4442412e-01  -3.5968808e+01
   2.2299346e+01  -2.6151603e+01   5.0000000e+01   5.0729957e+00  -9.7011732e+00  -3.9708360e+01
   2.2441699e+01  -2.6164552e+01   5.0000000e+01   5.3635204e+00  -1.5062389e+01  -4.8205760e+01
   2.2584779e+01  -2.6163228e+01   5.0000000e+01   4.8107571e+00  -1.5464320e+01  -5.8494315e+01
   2.2726800e+01  -2.6147648e+01   5.0000000e+01   3.3127006e+00  -1.1082089e+01  -6.8642355e+01
   2.2865988e+01  -2.6118006e+01   5.0000000e+01   2.0805921e+00  -1.4301281e+00  -7.6480396e+01
   2.3000608e+01  -2.6074673e+01   5.0000000e+01   2.0205981e+00   1.2938856e+01  -7.7651355e+01
   2.3128985e+01  -2.6018190e+01   5.0000000e+01   1.0062059e+00   2.8431225e+01  -6.9414041e+01
   2.3249532e+01  -2.5949261e+01   5.0000000e+01  -3.9205420e+00   4.0807624e+01  -5.5132582e+01
   2.3360764e+01  -2.5868743e+01   5.0000000e+01  -1.2101432e+01   4.9410965e+01  -4.1646216e+01
   2.3461321e+01  -2.5777637e+01   5.0000000e+01  -1.9587077e+01   5.7405137e+01  -3.2617249e+01
   2.3549984e+01  -2.5677070e+01   5.0000000e+01  -2.2950540e+01   6.6846753e+01  -2.5040922e+01
   2.3625690e+01  -2.5568286e+01   5.0000000e+01  -2.4680610e+01   7.3433732e+01  -1.3804138e+01
   2.3687542e+01  -2.5452625e+01   5.0000000e+01  -3.2201051e+01   6.9835787e+01  -2.9893609e+00
   2.3734822e+01  -2.5331509e+01   5.0000000e+01  -4.5976699e+01   5.5423823e+01  -5.2720007e+00
   2.3875586e+01  -2.4659982e+01   5.0000000e+01   8.6378052e+00   4.6745457e-01  -8.7197009e+01
   2.3830879e+01  -2.4537575e+01   5.0000000e+01   2.2910260e+01  -2.9630898e+00  -7.6892576e+01
   2.3773097e+01  -2.4419804e+01   5.0000000e+01   3.0744277e+01  -6.2820130e+00  -6.4541137e+01
   2.3702841e+01  -2.4307823e+01   5.0000000e+01   3.3358629e+01  -1.0107686e+01  -5.2986777e+01
   2.3620832e+01  -2.4202727e+01   5.0000000e+01   3.3054053e+01  -1.4092220e+01  -4.3726965e+01
   2.3527895e+01  -2.4105543e+01   5.0000000e+01   3.2149515e+01  -1.7770645e+01  -3.6299947e+01
   2.3424960e+01  -2.4017218e+01   5.0000000e+01   3.1211994e+01  -2.0745991e+01  -2.9490144e+01
   2.3313046e+01  -2.3938609e+01   5.0000000e+01   3.0153760e+01  -2.2980425e+01  -2.3230760e+01
   2.3193253e+01  -2.3870480e+01   5.0000000e+01   2.9653404e+01  -2.4866790e+01  -1.7566405e+01
   2.3066752e+01  -2.3813490e+01   5.0000000e+01   3.0263375e+01  -2.6363715e+01  -1.1781477e+01
   2.2934774e+01  -2.3768190e+01   5.0000000e+01   3.1776176e+01  -2.6660034e+01  -5.4655695e+00
   2.2798599e+01  -2.3735020e+01   5.0000000e+01   3.3606750e+01  -2.4901582e+01   6.2451129e-01
   2.2659544e+01  -2.3714297e+01   5.0000000e+01   3.5167847e+01  -2.1066781e+01   4.8965342e+00
   2.2518950e+01  -2.3706224e+01   5.0000000e+01   3.5990686e+01  -1.6316547e+01   5.8704159e+00
   2.2378173e+01  -2.3710877e+01   5.0000000e+01   3.5869400e+01  -1.2586588e+01   3.2830585e+00
   2.2238571e+01  -2.3728212e+01   5.0000000e+01   3.5012547e+01  -1.1504600e+01  -1.7538502e+00
   2.2101491e+01  -2.3758062e+01   5.0000000e+01   3.4061476e+01  -1.4056337e+01  -7.0713899e+00
   2.1968257e+01  -2.3800137e+01   5.0000000e+01   3.4016051e+01  -1.9379658e+01  -9.5369140e+00
   2.1840160e+01  -2.3854033e+01   5.0000000e+01   3.5637323e+01  -2.3813940e+01  -8.0233641e+00
   2.1718445e+01  -2.3919227e+01   5.0000000e+01   3.8508416e+01  -2.4439879e+01  -5.5351376e+00
   2.1604300e+01  -2.3995088e+01   5.0000000e+01   4.1081507e+01  -2.2107297e+01  -5.6039659e+00
   2.1498847e+01  -2.4080881e+01   5.0000000e+01   4.2045532e+01  -1.9239596e+01  -8.5834650e+00
   2.1403126e+01  -2.4175771e+01   5.0000000e+01   4.1345752e+01  -1.6681952e+01  -1.2991330e+01
   2.1318092e+01  -2.4278837e+01   5.0000000e+01   3.9139440e+01  -1.3913849e+01  -1.8328215e+01
   2.1244599e+01  -2.4389071e+01   5.0000000e+01   3.4501957e+01  -1.0873771e+01  -2.4432471e+01
   2.1183398e+01  -2.4505397e+01   5.0000000e+01   2.6510630e+01  -8.2114400e+00  -2.9400398e+01
   2.1135123e+01  -2.4626673e+01   5.0000000e+01   1.6302366e+01  -6.5249349e+00  -3.0145421e+01
   2.1100284e+01  -2.4751708e+01   5.0000000e+01   7.2997580e+00  -6.1752001e+00  -2.5091111e+01
   2.1079268e+01  -2.4879269e+01   5.0000000e+01   3.0755193e+00  -7.4456645e+00  -1.5867371e+01
   2.1072323e+01  -2.5008094e+01   5.0000000e+01   5.1300118e+00  -1.0426809e+01  -6.3100087e+00
   2.1079564e+01  -2.5136907e+01   5.0000000e+01   1.2542503e+01  -1.4925206e+01  -5.2025070e-01
   2.1100962e+01  -2.5264425e+01   5.0000000e+01   2.2477610e+01  -2.0458035e+01  -1.4230846e+00
   2.1136349e+01  -2.5389375e+01   5.0000000e+01   3.1441259e+01  -2.5942057e+01  -9.4314079e+00
   2.1185413e+01  -2.5510507e+01   5.0000000e+01   3.7213482e+01  -2.9604137e+01  -2.2775753e+01
   2.1247702e+01  -2.5626604e+01   5.0000000e+01   3.8909272e+01  -2.9683302e+01  -3.9047958e+01
   2.1322627e+01  -2.5736496e+01   5.0000000e+01   3.6257071e+01  -2.5422447e+01  -5.5514391e+01
   2.1409465e+01  -2.5839073e+01   5.0000000e+01   2.9691461e+01  -1.6938026e+01  -6.9410030e+01
   2.1507366e+01  -2.5933295e+01   5.0000000e+01   2.0048886e+01  -4.7224701e+00  -7.7472676e+01
   2.1615363e+01  -2.6018206e+01   5.0000000e+01   9.3789424e+00   8.4026092e+00  -7.5835240e+01
   2.1732377e+01  -2.6092940e+01   5.0000000e+01   1.1934964e+00   1.6609957e+01  -6.4668323e+01
   2.1857230e+01  -2.6156734e+01   5.0000000e+01  -2.5938959e+00   1.6198002e+01  -5.0608721e+01
   2.1988659e+01  -2.6208937e+01   5.0000000e+01  -3.2158746e+00   9.1265007e+00  -4.0702865e+01
   2.2125326e+01  -2.6249014e+01   5.0000000e+01  -2.7773258e+00  -4.8979373e-01  -3.7522774e+01
   2.2265835e+01  -2.6276554e+01   5.0000000e+01  -2.4231514e+00  -9.4597710e+00  -4.1047468e+01
   2.2408747e+01  -2.6291274e+01   5.0000000e+01  -2.4800158e+00  -1.4753677e+01  -4.9912981e+01
   2.2552596e+01  -2.6293022e+01   5.0000000e+01  -3.1704008e+00  -1.4456713e+01  -6.0750991e+01
   2.2695905e+01  -2.6281782e+01   5.0000000e+01  -4.9862155e+00  -9.0752300e+00  -7.0411582e+01
   2.2837204e+01  -2.6257668e+01   5.0000000e+01  -7.5184669e+00   1.3269717e-01  -7.7598841e+01
   2.2975043e+01  -2.6220927e+01   5.0000000e+01  -8.2111805e+00   1.2575199e+01  -8.1131240e+01
   2.3108015e+01  -2.6171938e+01   5.0000000e+01  -5.3303126e+00   2.7625198e+01  -7.7678082e+01
   2.3234764e+01  -2.6111201e+01   5.0000000e+01  -1.8492121e+00   4.1899029e+01  -6.4284180e+01
   2.3354006e+01  -2.6039339e+01   5.0000000e+01  -1.9518245e+00   5.0738019e+01  -4.4642183e+01
   2.3464538e+01  -2.5957085e+01   5.0000000e+01  -5.4138626e+00   5.4103407e+01  -2.6433589e+01
   2.3565255e+01  -2.5865276e+01   5.0000000e+01  -8.9139305e+00   5.6183523e+01  -1.2830340e+01
   2.3655157e+01  -2.5764847e+01   5.0000000e+01  -1.0453399e+01   5.9627678e+01  -6.8834046e-01
   2.3733362e+01  -2.5656816e+01   5.0000000e+01  -1.3028874e+01   6.2064697e+01   1.3939740e+01
   2.3799113e+01  -2.5542275e+01   5.0000000e+01  -2.3606511e+01   5.8787937e+01   2.7177476e+01
   2.3851784e+01  -2.5422380e+01   5.0000000e+01  -4.3599643e+01   4.8761396e+01   2.6785972e+01
   2.3890885e+01  -2.5298334e+01   5.0000000e+01  -6.2489064e+01   3.6078548e+01   5.3259684e+00
   2.3916068e+01  -2.5171383e+01   5.0000000e+01  -6.7547710e+01   2.5498650e+01  -2.9275925e+01
   2.3927125e+01  -2.5042792e+01   5.0000000e+01  -5.6600015e+01   1.7867744e+01  -6.1951952e+01
   2.3923990e+01  -2.4913844e+01   5.0000000e+01  -3.5668801e+01   1.1275531e+01  -8.3346117e+01
   2.3906739e+01  -2.4785818e+01   5.0000000e+01  -1.1911677e+01   5.1834506e+00  -9.1008318e+01
   2.3728573e+01  -2.4121189e+01   5.0000000e+01   3.1711834e+01  -1.0091779e+01  -4.0776427e+01
   2.3635549e+01  -2.4023575e+01   5.0000000e+01   3.1507489e+01  -1.4030873e+01  -3.4693469e+01
   2.3533333e+01  -2.3934023e+01   5.0000000e+01   3.0932034e+01  -1.7282023e+01  -2.8555007e+01
   2.3422770e+01  -2.3853255e+01   5.0000000e+01   2.9631841e+01  -2.0065179e+01  -2.2998580e+01
   2.3304766e+01  -2.3781924e+01   5.0000000e+01   2.8572761e+01  -2.2996016e+01  -1.8122319e+01
   2.3180283e+01  -2.3720604e+01   5.0000000e+01   2.8574180e+01  -2.6026959e+01  -1.2883170e+01
   2.3050332e+01  -2.3669791e+01   5.0000000e+01   2.9557231e+01  -2.8286879e+01  -6.4166738e+00
   2.2915960e+01  -2.3629891e+01   5.0000000e+01   3.0961369e+01  -2.8607025e+01   1.0513169e+00
   2.2778251e+01  -2.3601225e+01   5.0000000e+01   3.2296797e+01  -2.6266659e+01   8.1108665e+00
   2.2638311e+01  -2.3584025e+01   5.0000000e+01   3.3300822e+01  -2.1512401e+01   1.2822067e+01
   2.2497262e+01  -2.3578427e+01   5.0000000e+01   3.3796012e+01  -1.5833152e+01   1.3584326e+01
   2.2356235e+01  -2.3584476e+01   5.0000000e+01   3.3718061e+01  -1.1532404e+01   1.0244508e+01
   2.2216360e+01  -2.3602125e+01   5.0000000e+01   3.3268327e+01  -1.0575106e+01   4.1606531e+00
   2.2078760e+01  -2.3631230e+01   5.0000000e+01   3.2925742e+01  -1.4217136e+01  -1.9942356e+00
   2.1944540e+01  -2.3671560e+01   5.0000000e+01   3.3404134e+01  -2.1314980e+01  -4.3136226e+00
   2.1814781e+01  -2.3722789e+01   5.0000000e+01   3.5355984e+01  -2.7265832e+01  -1.3427189e+00
   2.1690531e+01  -2.3784506e+01   5.0000000e+01   3.8661725e+01  -2.8378852e+01   3.3954102e+00
   2.1572798e+01  -2.3856215e+01   5.0000000e+01   4.2208764e+01  -2.5502802e+01   5.3527871e+00
   2.1462542e+01  -2.3937336e+01   5.0000000e+01   4.4599644e+01  -2.1818726e+01   3.3124566e+00
   2.1360668e+01  -2.4027215e+01   5.0000000e+01   4.5356392e+01  -1.9093261e+01  -9.8144679e-01
   2.1268016e+01  -2.4125126e+01   5.0000000e+01   4.5094501e+01  -1.6840914e+01  -6.1844358e+00
   2.1185358e+01  -2.4230273e+01   5.0000000e+01   4.3885281e+01  -1.4263856e+01  -1.2826390e+01
   2.1113392e+01  -2.4341804e+01   5.0000000e+01   4.0305449e+01  -1.1589940e+01  -2.1170658e+01
   2.1052731e+01  -2.4458811e+01   5.0000000e+01   3.2891622e+01  -9.4130849e+00  -2.9229111e+01
   2.1003903e+01  -2.4580337e+01   5.0000000e+01   2.2100015e+01  -7.9009886e+00  -3.3555625e+01
   2.0967340e+01  -2.4705388e+01   5.0000000e+01   1.0808440e+01  -7.0038737e+00  -3.1586279e+01
   2.0943381e+01  -2.4832937e+01   5.0000000e+01   2.9394846e+00  -6.9047277e+00  -2.3609002e+01
   2.0932261e+01  -2.4961935e+01   5.0000000e+01   1.1394834e+00  -7.9848409e+00  -1.2820647e+01
   2.0934113e+01  -2.5091316e+01   5.0000000e+01   5.4998232e+00  -1.0605768e+01  -3.5419218e+00
   2.0948962e+01  -2.5220008e+01   5.0000000e+01   1.3881213e+01  -1.5004972e+01   7.5651323e-01
   2.0976725e+01  -2.5346941e+01   5.0000000e+01   2.3193471e+01  -2.0906483e+01  -1.3059738e+00
   2.1017212e+01  -2.5471057e+01   5.0000000e+01   3.1146197e+01  -2.7111125e+01  -9.2276635e+00
   2.1070124e+01  -2.5591318e+01   5.0000000e+01   3.6512282e+01  -3.1710366e+01  -2.2120018e+01
   2.1135052e+01  -2.5706714e+01   5.0000000e+01   3.7892884e+01  -3.2920995e+01  -3.8515842e+01
   2.1211486e+01  -2.5816275e+01   5.0000000e+01   3.4459111e+01  -3.0060712e+01  -5.5432497e+01
   2.1298812e+01  -2.5919076e+01   5.0000000e+01   2.6863210e+01  -2.3300633e+01  -6.9959996e+01
   2.1396318e+01  -2.6014246e+01   5.0000000e+01   1.6108789e+01  -1.2697089e+01  -7.9580982e+01
   2.1503202e+01  -2.6100978e+01   5.0000000e+01   4.0549046e+00   4.1945132e-01  -8.0791181e+01
   2.1618575e+01  -2.6178534e+01   5.0000000e+01  -5.7082558e+00   1.1489615e+01  -7.2092218e+01
   2.1741470e+01  -2.6246251e+01   5.0000000e+01  -1.0540490e+01   1.5612525e+01  -5.7858666e+01
   2.1870849e+01  -2.6303553e+01   5.0000000e+01  -1.1173435e+01   1.2260729e+01  -4.5228671e+01
   2.2005615e+01  -2.6349947e+01   5.0000000e+01  -1.0120715e+01   4.6968282e+00  -3.8307664e+01
   2.2144619e+01  -2.6385037e+01   5.0000000e+01  -9.2871945e+00  -3.9314334e+00  -3.7652209e+01
   2.2286673e+01  -2.6408521e+01   5.0000000e+01  -9.4117188e+00  -1.1333152e+01  -4.2991304e+01
   2.2430558e+01  -2.6420198e+01   5.0000000e+01  -1.0335730e+01  -1.4725098e+01  -5.3082911e+01
   2.2575040e+01  -2.6419967e+01   5.0000000e+01  -1.1656254e+01  -1.2099287e+01  -6.4481319e+01
   2.2718877e+01  -2.6407830e+01   5.0000000e+01  -1.3612973e+01  -3.9979276e+00  -7.3089280e+01
   2.2860835e+01  -2.6383891e+01   5.0000000e+01  -1.6423719e+01   6.7170728e+00  -7.6947484e+01
   2.2999697e+01  -2.6348357e+01   5.0000000e+01  -1.8169052e+01   1.7613090e+01  -7.7667336e+01
   2.3134275e+01  -2.6301531e+01   5.0000000e+01  -1.5521562e+01   2.9691941e+01  -7.5701172e+01
   2.3263423e+01  -2.6243816e+01   5.0000000e+01  -8.7315898e+00   4.2678299e+01  -6.6239533e+01
   2.3386045e+01  -2.6175706e+01   5.0000000e+01  -2.6033005e+00   5.1153554e+01  -4.7854624e+01
   2.3501106e+01  -2.6097781e+01   5.0000000e+01  -2.8106891e-01   5.2151978e+01  -2.7635641e+01
   2.3607643e+01  -2.6010708e+01   5.0000000e+01  -2.9441244e-01   4.9231370e+01  -1.1912779e+01
   2.3704769e+01  -2.5915227e+01   5.0000000e+01   2.7160419e-02   4.6792572e+01  -1.4130267e-01
   2.3791685e+01  -2.5812147e+01   5.0000000e+01   9.2828402e-01   4.5631384e+01   1.2105323e+01
   2.3867684e+01  -2.5702342e+01   5.0000000e+01  -1.7319509e+00   4.3456663e+01   2.7379577e+01
   2.3932155e+01  -2.5586739e+01   5.0000000e+01  -1.4460408e+01   3.8315450e+01   4.0974247e+01
   2.3984591e+01  -2.5466309e+01   5.0000000e+01  -3.8174952e+01   3.1182151e+01   4.1169844e+01
   2.4024590e+01  -2.5342065e+01   5.0000000e+01  -6.2130349e+01   2.5278523e+01   1.9766659e+01
   2.4051855e+01  -2.5215044e+01   5.0000000e+01  -7.2295689e+01   2.2903201e+01  -1.6433935e+01
   2.4066201e+01  -2.5086305e+01   5.0000000e+01  -6.5618447e+01   2.2675073e+01  -5.2194655e+01
   2.4067549e+01  -2.4956919e+01   5.0000000e+01  -4.7681189e+01   2.1127615e+01  -7.8569297e+01
   2.4055928e+01  -2.4827958e+01   5.0000000e+01  -2.3867036e+01   1.6981588e+01  -9.2494884e+01
   2.4031475e+01  -2.4700486e+01   5.0000000e+01  -1.1762128e-01   1.1696110e+01  -9.3114965e+01
   2.3994430e+01  -2.4575552e+01   5.0000000e+01   1.7933566e+01   6.7868379e+00  -8.3758079e+01
   2.3945134e+01  -2.4454183e+01   5.0000000e+01   2.8251136e+01   2.5455882e+00  -7.0249243e+01
   2.3884024e+01  -2.4337372e+01   5.0000000e+01   3.2078061e+01  -1.5390052e+00  -5.7468694e+01
   2.3811632e+01  -2.4226071e+01   5.0000000e+01   3.2280198e+01  -5.8078666e+00  -4.7753656e+01
   2.3375689e+01  -2.3671439e+01   5.0000000e+01   2.6516430e+01  -2.1501694e+01  -1.6622076e+01
   2.3252789e+01  -2.3610399e+01   5.0000000e+01   2.6481823e+01  -2.5530947e+01  -1.2249040e+01
   2.3124911e+01  -2.3558757e+01   5.0000000e+01   2.7199776e+01  -2.8957280e+01  -6.0129389e+00
   2.2992907e+01  -2.3516857e+01   5.0000000e+01   2.7996547e+01  -3.0578461e+01   1.8090471e+00
   2.2857652e+01  -2.3484975e+01   5.0000000e+01   2.8589199e+01  -2.9563867e+01   9.8982089e+00
   2.2720038e+01  -2.3463321e+01   5.0000000e+01   2.9040715e+01  -2.5714665e+01   1.6520184e+01
   2.2580974e+01  -2.3452037e+01   5.0000000e+01   2.9364858e+01  -1.9754697e+01   1.9873757e+01
   2.2441376e+01  -2.3451200e+01   5.0000000e+01   2.9475168e+01  -1.3642094e+01   1.8801022e+01
   2.2302165e+01  -2.3460813e+01   5.0000000e+01   2.9339530e+01  -9.8303639e+00   1.3715272e+01
   2.2164258e+01  -2.3480814e+01   5.0000000e+01   2.9171859e+01  -1.0307701e+01   6.4968344e+00
   2.2028563e+01  -2.3511070e+01   5.0000000e+01   2.9326501e+01  -1.5952781e+01   6.3399143e-01
   2.1895979e+01  -2.3551382e+01   5.0000000e+01   3.0271587e+01  -2.4376256e+01   2.3611679e-01
   2.1767383e+01  -2.3601484e+01   5.0000000e+01   3.2508866e+01  -3.0184520e+01   5.6280377e+00
   2.1643629e+01  -2.3661045e+01   5.0000000e+01   3.5947529e+01  -3.0212425e+01   1.2284018e+01
   2.1525543e+01  -2.3729670e+01   5.0000000e+01   3.9725346e+01  -2.6034423e+01   1.5637894e+01
   2.1413916e+01  -2.3806904e+01   5.0000000e+01   4.2722700e+01  -2.1153458e+01   1.4525501e+01
   2.1309500e+01  -2.3892235e+01   5.0000000e+01   4.4341954e+01  -1.7763950e+01   1.0647313e+01
   2.1213003e+01  -2.3985096e+01   5.0000000e+01   4.5067003e+01  -1.5743519e+01   5.9749516e+00
   2.1125086e+01  -2.4084868e+01   5.0000000e+01   4.5680441e+01  -1.3963839e+01   5.6544466e-01
   2.1046355e+01  -2.4190885e+01   5.0000000e+01   4.5721753e+01  -1.2062351e+01  -6.8304716e+00
   2.0977359e+01  -2.4302438e+01   5.0000000e+01   4.3424874e+01  -1.0574960e+01  -1.6395163e+01
   2.0918587e+01  -2.4418778e+01   5.0000000e+01   3.7275690e+01  -9.8804595e+00  -2.6213173e+01
   2.0870461e+01  -2.4539125e+01   5.0000000e+01   2.7346994e+01  -9.6652873e+00  -3.3165553e+01
   2.0833338e+01  -2.4662665e+01   5.0000000e+01   1.5680989e+01  -9.3436523e+00  -3.4471342e+01
   2.0807500e+01  -2.4788566e+01   5.0000000e+01   5.7051504e+00  -8.7172374e+00  -2.9304808e+01
   2.0793157e+01  -2.4915972e+01   5.0000000e+01   5.4971360e-01  -8.2147521e+00  -1.9633484e+01
   2.0790442e+01  -2.5044017e+01   5.0000000e+01   1.3051705e+00  -8.6529713e+00  -9.2603730e+00
   2.0799410e+01  -2.5171828e+01   5.0000000e+01   6.7327769e+00  -1.0846142e+01  -1.7334010e+00
   2.0820036e+01  -2.5298531e+01   5.0000000e+01   1.4451184e+01  -1.5146029e+01   1.0866585e+00
   2.0852214e+01  -2.5423255e+01   5.0000000e+01   2.2487012e+01  -2.1083110e+01  -1.0422214e+00
   2.0895760e+01  -2.5545142e+01   5.0000000e+01   2.9857947e+01  -2.7413899e+01  -8.0975980e+00
   2.0950406e+01  -2.5663350e+01   5.0000000e+01   3.5204970e+01  -3.2455270e+01  -2.0354964e+01
   2.1015807e+01  -2.5777060e+01   5.0000000e+01   3.6313099e+01  -3.4673347e+01  -3.6447742e+01
   2.1091539e+01  -2.5885481e+01   5.0000000e+01   3.2427794e+01  -3.3341777e+01  -5.2960423e+01
   2.1177102e+01  -2.5987858e+01   5.0000000e+01   2.4671442e+01  -2.8369772e+01  -6.7113978e+01
   2.1271924e+01  -2.6083476e+01   5.0000000e+01   1.4023519e+01  -1.9708063e+01  -7.7181131e+01
   2.1375364e+01  -2.6171663e+01   5.0000000e+01   1.6786347e+00  -7.9893133e+00  -8.0695102e+01
   2.1486712e+01  -2.6251800e+01   5.0000000e+01  -9.4891997e+00   3.9449893e+00  -7.5612794e+01
   2.1605202e+01  -2.6323323e+01   5.0000000e+01  -1.6357989e+01   1.1744474e+01  -6.3666273e+01
   2.1730011e+01  -2.6385727e+01   5.0000000e+01  -1.8284926e+01   1.2963447e+01  -5.0242861e+01
   2.1860266e+01  -2.6438570e+01   5.0000000e+01  -1.7202664e+01   8.7855712e+00  -4.0374558e+01
   2.1995052e+01  -2.6481479e+01   5.0000000e+01  -1.5526152e+01   2.1403432e+00  -3.5966765e+01
   2.2133419e+01  -2.6514149e+01   5.0000000e+01  -1.4791110e+01  -4.8198846e+00  -3.6687920e+01
   2.2274388e+01  -2.6536348e+01   5.0000000e+01  -1.5555720e+01  -1.0684398e+01  -4.2174489e+01
   2.2416960e+01  -2.6547918e+01   5.0000000e+01  -1.7578432e+01  -1.3315429e+01  -5.1885655e+01
   2.2560121e+01  -2.6548777e+01   5.0000000e+01  -2.0125154e+01  -1.0444787e+01  -6.3408429e+01
   2.2702855e+01  -2.6538919e+01   5.0000000e+01  -2.2550358e+01  -1.7095406e+00  -7.2385904e+01
   2.2844148e+01  -2.6518414e+01   5.0000000e+01  -2.4689958e+01   9.9577414e+00  -7.5009984e+01
   2.2982999e+01  -2.6487408e+01   5.0000000e+01  -2.6424188e+01   2.0055683e+01  -7.2398430e+01
   2.3118424e+01  -2.6446121e+01   5.0000000e+01  -2.6140767e+01   2.8271728e+01  -6.9379883e+01
   2.3249467e+01  -2.6394845e+01   5.0000000e+01  -2.1426166e+01   3.7866944e+01  -6.5319392e+01
   2.3375208e+01  -2.6333945e+01   5.0000000e+01  -1.3063282e+01   4.7010702e+01  -5.4607864e+01
   2.3494767e+01  -2.6263850e+01   5.0000000e+01  -5.1614393e+00   5.0088356e+01  -3.7813754e+01
   2.3607312e+01  -2.6185057e+01   5.0000000e+01  -3.1617273e-01   4.6658032e+01  -2.1643878e+01
   2.3712068e+01  -2.6098119e+01   5.0000000e+01   2.2720126e+00   4.1103972e+01  -9.9174661e+00
   2.3808315e+01  -2.6003648e+01   5.0000000e+01   4.3832724e+00   3.6738117e+01  -1.2443032e+00
   2.3895402e+01  -2.5902307e+01   5.0000000e+01   6.4261546e+00   3.3674564e+01   7.7930026e+00
   2.3972745e+01  -2.5794804e+01   5.0000000e+01   6.2809054e+00   3.0066031e+01   1.9576725e+01
   2.4039831e+01  -2.5681889e+01   5.0000000e+01  -5.7485281e-01   2.4565480e+01   3.2923318e+01
   2.4096225e+01  -2.5564347e+01   5.0000000e+01  -1.7982810e+01   1.8275274e+01   4.1018239e+01
   2.4141569e+01  -2.5442993e+01   5.0000000e+01  -4.2696458e+01   1.4737465e+01   3.3949614e+01
   2.4175583e+01  -2.5318666e+01   5.0000000e+01  -6.2809355e+01   1.6807830e+01   9.0664148e+00
   2.4198068e+01  -2.5192222e+01   5.0000000e+01  -6.8681090e+01   2.3055845e+01  -2.3619226e+01
   2.4208907e+01  -2.5064529e+01   5.0000000e+01  -6.1583975e+01   2.8721605e+01  -5.3031393e+01
   2.4208062e+01  -2.4936463e+01   5.0000000e+01  -4.5716431e+01   3.0203576e+01  -7.5723993e+01
   2.4195575e+01  -2.4808896e+01   5.0000000e+01  -2.3451827e+01   2.7451470e+01  -8.8974294e+01
   2.4171566e+01  -2.4682697e+01   5.0000000e+01  -3.4160284e-01   2.2336870e+01  -9.0017759e+01
   2.4136234e+01  -2.4558721e+01   5.0000000e+01   1.7311613e+01   1.6437866e+01  -8.1233733e+01
   2.4089849e+01  -2.4437808e+01   5.0000000e+01   2.7093637e+01   1.0627292e+01  -6.8138408e+01
   2.4032755e+01  -2.4320772e+01   5.0000000e+01   3.0269412e+01   5.2432039e+00  -5.5798628e+01
   2.3965366e+01  -2.4208401e+01   5.0000000e+01   3.0162265e+01   2.5703517e-01  -4.6829321e+01
   2.3888159e+01  -2.4101448e+01   5.0000000e+01   2.9847547e+01  -4.3965064e+00  -4.0767665e+01
   2.3801674e+01  -2.4000630e+01   5.0000000e+01   3.0318243e+01  -8.6582248e+00  -3.5528987e+01
   2.3706508e+01  -2.3906619e+01   5.0000000e+01   3.0551477e+01  -1.2269444e+01  -2.9804345e+01
   2.3603315e+01  -2.3820042e+01   5.0000000e+01   2.9495525e+01  -1.5133361e+01  -2.4289139e+01
   2.3492793e+01  -2.3741475e+01   5.0000000e+01   2.7704278e+01  -1.7946212e+01  -2.0095290e+01
   2.2885146e+01  -2.3358892e+01   5.0000000e+01   2.3984554e+01  -3.1127263e+01   1.2413858e+01
   2.2747192e+01  -2.3336925e+01   5.0000000e+01   2.3948266e+01  -2.7560239e+01   1.9404288e+01
   2.2607843e+01  -2.3324592e+01   5.0000000e+01   2.4041462e+01  -2.1475032e+01   2.3502188e+01
   2.2467885e+01  -2.3321961e+01   5.0000000e+01   2.4170261e+01  -1.4650633e+01   2.3160743e+01
   2.2328108e+01  -2.3329048e+01   5.0000000e+01   2.4302348e+01  -9.7257708e+00   1.8242332e+01
   2.2189302e+01  -2.3345813e+01   5.0000000e+01   2.4574669e+01  -9.1199019e+00   1.0469573e+01
   2.2052250e+01  -2.3372160e+01   5.0000000e+01   2.5130055e+01  -1.4048184e+01   3.3010999e+00
   2.1917727e+01  -2.3407942e+01   5.0000000e+01   2.5981437e+01  -2.2909711e+01   1.1803553e+00
   2.1786497e+01  -2.3452954e+01   5.0000000e+01   2.7521999e+01  -3.0511908e+01   5.9808304e+00
   2.1659305e+01  -2.3506944e+01   5.0000000e+01   3.0199168e+01  -3.2156832e+01   1.4136064e+01
   2.1536875e+01  -2.3569604e+01   5.0000000e+01   3.3648941e+01  -2.7966944e+01   2.0204949e+01
   2.1419911e+01  -2.3640580e+01   5.0000000e+01   3.6950341e+01  -2.1419785e+01   2.1581550e+01
   2.1309083e+01  -2.3719467e+01   5.0000000e+01   3.9313577e+01  -1.5828854e+01   1.8981341e+01
   2.1205035e+01  -2.3805818e+01   5.0000000e+01   4.0589742e+01  -1.2503568e+01   1.4715645e+01
   2.1108372e+01  -2.3899139e+01   5.0000000e+01   4.1480146e+01  -1.0733242e+01   1.0529466e+01
   2.1019662e+01  -2.3998898e+01   5.0000000e+01   4.2797135e+01  -9.2369790e+00   6.1618756e+00
   2.0939431e+01  -2.4104524e+01   5.0000000e+01   4.4195175e+01  -7.6919371e+00   5.1338117e-02
   2.0868161e+01  -2.4215411e+01   5.0000000e+01   4.4050811e+01  -6.8282143e+00  -8.5640536e+00
   2.0806283e+01  -2.4330923e+01   5.0000000e+01   4.0748124e+01  -7.3275213e+00  -1.8563353e+01
   2.0754180e+01  -2.4450392e+01   5.0000000e+01   3.3775654e+01  -8.9303778e+00  -2.7572211e+01
   2.0712181e+01  -2.4573129e+01   5.0000000e+01   2.3936029e+01  -1.0540211e+01  -3.2985844e+01
   2.0680558e+01  -2.4698422e+01   5.0000000e+01   1.3319516e+01  -1.1054386e+01  -3.2894868e+01
   2.0659528e+01  -2.4825544e+01   5.0000000e+01   4.8303459e+00  -1.0204049e+01  -2.7186052e+01
   2.0649244e+01  -2.4953753e+01   5.0000000e+01   7.9825499e-01  -8.7564073e+00  -1.8008965e+01
   2.0649800e+01  -2.5082300e+01   5.0000000e+01   1.6352618e+00  -8.0577679e+00  -8.6614442e+00
   2.0661227e+01  -2.5210431e+01   5.0000000e+01   6.0383053e+00  -9.2991937e+00  -1.7690090e+00
   2.0683492e+01  -2.5337393e+01   5.0000000e+01   1.2289486e+01  -1.2928208e+01   1.4745295e+00
   2.0716498e+01  -2.5462436e+01   5.0000000e+01   1.9370702e+01  -1.8529113e+01   7.4900131e-01
   2.0760083e+01  -2.5584819e+01   5.0000000e+01   2.6740568e+01  -2.5014538e+01  -4.6856735e+00
   2.0814019e+01  -2.5703817e+01   5.0000000e+01   3.2578453e+01  -3.0911516e+01  -1.5721140e+01
   2.0878018e+01  -2.5818719e+01   5.0000000e+01   3.4129238e+01  -3.4801858e+01  -3.0906449e+01
   2.0951725e+01  -2.5928839e+01   5.0000000e+01   3.0827255e+01  -3.5763549e+01  -4.6689375e+01
   2.1034725e+01  -2.6033518e+01   5.0000000e+01   2.4206860e+01  -3.3162662e+01  -6.0696674e+01
   2.1126546e+01  -2.6132125e+01   5.0000000e+01   1.5015411e+01  -2.6551547e+01  -7.1768119e+01
   2.1226655e+01  -2.6224067e+01   5.0000000e+01   3.5225331e+00  -1.6356941e+01  -7.7895651e+01
   2.1334468e+01  -2.6308787e+01   5.0000000e+01  -8.4472720e+00  -4.4912981e+00  -7.6759152e+01
   2.1449347e+01  -2.6385773e+01   5.0000000e+01  -1.7804236e+01   5.6733477e+00  -6.8170431e+01
   2.1570610e+01  -2.6454557e+01   5.0000000e+01  -2.2425535e+01   1.0962715e+01  -5.5462407e+01
   2.1697530e+01  -2.6514720e+01   5.0000000e+01  -2.2771280e+01   1.0675036e+01  -4.3589221e+01
   2.1829343e+01  -2.6565895e+01   5.0000000e+01  -2.1110170e+01   6.5485100e+00  -3.5951607e+01
   2.1965251e+01  -2.6607770e+01   5.0000000e+01  -1.9630972e+01   1.0138272e+00  -3.3306583e+01
   2.2104427e+01  -2.6640090e+01   5.0000000e+01  -1.9504215e+01  -4.3471599e+00  -3.4818260e+01
   2.2246024e+01  -2.6662655e+01   5.0000000e+01  -2.1065550e+01  -8.6996522e+00  -3.9917668e+01
   2.2389175e+01  -2.6675328e+01   5.0000000e+01  -2.4261306e+01  -1.0520907e+01  -4.8402413e+01
   2.2533005e+01  -2.6678032e+01   5.0000000e+01  -2.8645316e+01  -7.7071208e+00  -5.8691053e+01
   2.2676632e+01  -2.6670749e+01   5.0000000e+01  -3.3032351e+01   4.2639595e-01  -6.7191873e+01
   2.2819178e+01  -2.6653524e+01   5.0000000e+01  -3.5657394e+01   1.1658702e+01  -7.0087534e+01
   2.2959771e+01  -2.6626464e+01   5.0000000e+01  -3.5888437e+01   2.1703182e+01  -6.6684575e+01
   2.3097552e+01  -2.6589733e+01   5.0000000e+01  -3.4618531e+01   2.8289808e+01  -6.1159490e+01
   2.3231682e+01  -2.6543556e+01   5.0000000e+01  -3.1517202e+01   3.4130903e+01  -5.7024667e+01
   2.3361348e+01  -2.6488215e+01   5.0000000e+01  -2.5174626e+01   4.1094837e+01  -5.1434261e+01
   2.3485766e+01  -2.6424049e+01   5.0000000e+01  -1.6471408e+01   4.5502541e+01  -4.1263474e+01
   2.3604188e+01  -2.6351448e+01   5.0000000e+01  -8.3378396e+00   4.4234005e+01  -2.9079976e+01
   2.3715908e+01  -2.6270853e+01   5.0000000e+01  -2.5026816e+00   3.9136693e+01  -1.8938262e+01
   2.3820262e+01  -2.6182753e+01   5.0000000e+01   1.4885360e+00   3.3738601e+01  -1.1758333e+01
   2.3916638e+01  -2.6087682e+01   5.0000000e+01   4.6523885e+00   2.9857009e+01  -5.8329133e+00
   2.4004476e+01  -2.5986214e+01   5.0000000e+01   7.0492910e+00   2.7084730e+01   1.0050383e+00
   2.4083268e+01  -2.5878959e+01   5.0000000e+01   7.4348611e+00   2.3736557e+01   9.7472092e+00
   2.4152569e+01  -2.5766561e+01   5.0000000e+01   3.5199647e+00   1.8481419e+01   1.9609120e+01
   2.4211992e+01  -2.5649693e+01   5.0000000e+01  -7.2839602e+00   1.2039660e+01   2.7346835e+01
   2.4261212e+01  -2.5529053e+01   5.0000000e+01  -2.5137036e+01   8.2482045e+00   2.7364945e+01
   2.4299968e+01  -2.5405359e+01   5.0000000e+01  -4.4798592e+01   1.1189645e+01   1.5489486e+01
   2.4328063e+01  -2.5279343e+01   5.0000000e+01  -5.7700667e+01   2.0105817e+01  -5.8071531e+00
   2.4345364e+01  -2.5151752e+01   5.0000000e+01  -6.0155689e+01   2.9769954e+01  -2.9101983e+01
   2.4351805e+01  -2.5023336e+01   5.0000000e+01  -5.4162936e+01   3.5754001e+01  -5.0898895e+01
   2.4347380e+01  -2.4894850e+01   5.0000000e+01  -3.9883025e+01   3.7083466e+01  -7.0009523e+01
   2.4332151e+01  -2.4767047e+01   5.0000000e+01  -1.8712147e+01   3.4707429e+01  -8.1058337e+01
   2.4306238e+01  -2.4640673e+01   5.0000000e+01   2.4725566e+00   2.9876090e+01  -8.0692063e+01
   2.4269825e+01  -2.4516463e+01   5.0000000e+01   1.7606282e+01   2.3685538e+01  -7.2059687e+01
   2.4223154e+01  -2.4395138e+01   5.0000000e+01   2.5152878e+01   1.7036502e+01  -6.0521345e+01
   2.4166523e+01  -2.4277400e+01   5.0000000e+01   2.7000069e+01   1.0565463e+01  -5.0441957e+01
   2.4100285e+01  -2.4163929e+01   5.0000000e+01   2.6757745e+01   4.6117556e+00  -4.3528682e+01
   2.4024848e+01  -2.4055378e+01   5.0000000e+01   2.7136469e+01  -6.7185151e-01  -3.8689892e+01
   2.3940665e+01  -2.3952370e+01   5.0000000e+01   2.8439409e+01  -5.2012743e+00  -3.3925335e+01
   2.3848239e+01  -2.3855496e+01   5.0000000e+01   2.9234076e+01  -8.8615719e+00  -2.8377767e+01
   2.3748115e+01  -2.3765309e+01   5.0000000e+01   2.8354106e+01  -1.1644714e+01  -2.2945862e+01
   2.3640879e+01  -2.3682323e+01   5.0000000e+01   2.6244713e+01  -1.4073517e+01  -1.9071798e+01
   2.3527155e+01  -2.3607013e+01   5.0000000e+01   2.4415822e+01  -1.7220243e+01  -1.6787942e+01
   2.3407598e+01  -2.3539804e+01   5.0000000e+01   2.3798071e+01  -2.1527501e+01  -1.4339060e+01
   2.3282895e+01  -2.3481081e+01   5.0000000e+01   2.4072127e+01  -2.6190306e+01  -1.0018483e+01
   2.3153759e+01  -2.3431174e+01   5.0000000e+01   2.4357294e+01  -2.9923585e+01  -3.5039931e+00
   2.3020924e+01  -2.3390368e+01   5.0000000e+01   2.4219096e+01  -3.1768528e+01   4.3444282e+00
   2.2313461e+01  -2.3201601e+01   5.0000000e+01   1.9624924e+01  -9.4578434e+00   1.8773514e+01
   2.2174341e+01  -2.3218180e+01   5.0000000e+01   2.0745495e+01  -9.6096396e+00   1.0608372e+01
   2.2036814e+01  -2.3243714e+01   5.0000000e+01   2.2200897e+01  -1.5277207e+01   3.6078443e+00
   2.1901552e+01  -2.3278077e+01   5.0000000e+01   2.3555283e+01  -2.4470408e+01   1.7034142e+00
   2.1769220e+01  -2.3321100e+01   5.0000000e+01   2.5080451e+01  -3.2335373e+01   6.4902776e+00
   2.1640468e+01  -2.3372575e+01   5.0000000e+01   2.7625021e+01  -3.4179748e+01   1.4759092e+01
   2.1515932e+01  -2.3432246e+01   5.0000000e+01   3.1119616e+01  -2.9655931e+01   2.1057516e+01
   2.1396230e+01  -2.3499823e+01   5.0000000e+01   3.4526935e+01  -2.2090922e+01   2.2498427e+01
   2.1281956e+01  -2.3574971e+01   5.0000000e+01   3.6914077e+01  -1.5072156e+01   1.9661281e+01
   2.1173683e+01  -2.3657321e+01   5.0000000e+01   3.8038168e+01  -1.0469373e+01   1.4907977e+01
   2.1071957e+01  -2.3746467e+01   5.0000000e+01   3.8423539e+01  -8.0766495e+00   1.0496534e+01
   2.0977292e+01  -2.3841967e+01   5.0000000e+01   3.9048712e+01  -6.4732870e+00   7.1389617e+00
   2.0890172e+01  -2.3943350e+01   5.0000000e+01   4.0463378e+01  -4.5308108e+00   3.6735710e+00
   2.0811049e+01  -2.4050112e+01   5.0000000e+01   4.1945009e+01  -2.4524726e+00  -1.6512232e+00
   2.0740335e+01  -2.4161722e+01   5.0000000e+01   4.1851177e+01  -1.4771140e+00  -9.3295432e+00
   2.0678403e+01  -2.4277624e+01   5.0000000e+01   3.8972989e+01  -2.6444036e+00  -1.8057515e+01
   2.0625589e+01  -2.4397238e+01   5.0000000e+01   3.3302241e+01  -5.7551203e+00  -2.5796928e+01
   2.0582181e+01  -2.4519965e+01   5.0000000e+01   2.5601911e+01  -9.3379168e+00  -3.0835398e+01
   2.0548425e+01  -2.4645188e+01   5.0000000e+01   1.7011652e+01  -1.1573407e+01  -3.1987050e+01
   2.0524521e+01  -2.4772277e+01   5.0000000e+01   9.1806335e+00  -1.1447320e+01  -2.8788139e+01
   2.0510619e+01  -2.4900589e+01   5.0000000e+01   3.9557994e+00  -9.2993225e+00  -2.2088483e+01
   2.0506821e+01  -2.5029474e+01   5.0000000e+01   2.2483129e+00  -6.5903707e+00  -1.3983661e+01
   2.0513178e+01  -2.5158276e+01   5.0000000e+01   3.6390621e+00  -5.1440578e+00  -6.5790241e+00
   2.0529689e+01  -2.5286339e+01   5.0000000e+01   7.1566792e+00  -6.2254899e+00  -1.1983649e+00
   2.0556303e+01  -2.5413007e+01   5.0000000e+01   1.2109718e+01  -1.0164369e+01   1.5506907e+00
   2.0592913e+01  -2.5537629e+01   5.0000000e+01   1.8471157e+01  -1.6385320e+01   8.4067833e-01
   2.0639364e+01  -2.5659565e+01   5.0000000e+01   2.5407443e+01  -2.3594231e+01  -5.0114746e+00
   2.0695445e+01  -2.5778184e+01   5.0000000e+01   3.0024817e+01  -3.0245526e+01  -1.6433962e+01
   2.0760893e+01  -2.5892871e+01   5.0000000e+01   2.9993850e+01  -3.5101165e+01  -3.0638515e+01
   2.0835398e+01  -2.6003030e+01   5.0000000e+01   2.6354387e+01  -3.7377555e+01  -4.4461272e+01
   2.0918594e+01  -2.6108086e+01   5.0000000e+01   2.0864618e+01  -3.6069350e+01  -5.7324667e+01
   2.1010072e+01  -2.6207491e+01   5.0000000e+01   1.3054546e+01  -3.0231070e+01  -6.8621973e+01
   2.1109371e+01  -2.6300723e+01   5.0000000e+01   2.4297460e+00  -2.0425060e+01  -7.5620385e+01
   2.1215991e+01  -2.6387291e+01   5.0000000e+01  -9.2580301e+00  -8.7605538e+00  -7.5689172e+01
   2.1329383e+01  -2.6466740e+01   5.0000000e+01  -1.9016195e+01   1.8699879e+00  -6.8417174e+01
   2.1448965e+01  -2.6538649e+01   5.0000000e+01  -2.4523591e+01   8.5537409e+00  -5.6378333e+01
   2.1574114e+01  -2.6602638e+01   5.0000000e+01  -2.5625894e+01   1.0177816e+01  -4.4152257e+01
   2.1704176e+01  -2.6658366e+01   5.0000000e+01  -2.4274050e+01   7.9498799e+00  -3.5293511e+01
   2.1838468e+01  -2.6705539e+01   5.0000000e+01  -2.2809813e+01   3.8747922e+00  -3.0927259e+01
   2.1976280e+01  -2.6743904e+01   5.0000000e+01  -2.2660460e+01  -4.0729752e-01  -3.0491960e+01
   2.2116882e+01  -2.6773258e+01   5.0000000e+01  -2.4192739e+01  -4.0936800e+00  -3.3048742e+01
   2.2259526e+01  -2.6793443e+01   5.0000000e+01  -2.7342093e+01  -6.4976903e+00  -3.8282971e+01
   2.2403453e+01  -2.6804352e+01   5.0000000e+01  -3.2046260e+01  -6.0973665e+00  -4.5684648e+01
   2.2547895e+01  -2.6805927e+01   5.0000000e+01  -3.7916572e+01  -1.3966954e+00  -5.3133074e+01
   2.2692082e+01  -2.6798159e+01   5.0000000e+01  -4.3579963e+01   6.8606983e+00  -5.7585834e+01
   2.2835244e+01  -2.6781090e+01   5.0000000e+01  -4.6525902e+01   1.5788948e+01  -5.7785797e+01
   2.2976618e+01  -2.6754810e+01   5.0000000e+01  -4.5320930e+01   2.3043594e+01  -5.4580214e+01
   2.3115452e+01  -2.6719461e+01   5.0000000e+01  -4.1511497e+01   2.7898669e+01  -4.9991928e+01
   2.3251011e+01  -2.6675231e+01   5.0000000e+01  -3.6779895e+01   3.1834782e+01  -4.6043139e+01
   2.3382576e+01  -2.6622354e+01   5.0000000e+01  -3.0742827e+01   3.6300040e+01  -4.1799368e+01
   2.3509455e+01  -2.6561113e+01   5.0000000e+01  -2.3234280e+01   3.9419877e+01  -3.5505503e+01
   2.3630984e+01  -2.6491832e+01   5.0000000e+01  -1.5613910e+01   3.9046042e+01  -2.8205473e+01
   2.3746529e+01  -2.6414879e+01   5.0000000e+01  -9.3216514e+00   3.5800704e+01  -2.1904013e+01
   2.3855494e+01  -2.6330661e+01   5.0000000e+01  -4.5074321e+00   3.1657569e+01  -1.7303541e+01
   2.3957318e+01  -2.6239621e+01   5.0000000e+01  -4.2841857e-01   2.8185882e+01  -1.3608088e+01
   2.4051485e+01  -2.6142240e+01   5.0000000e+01   3.2669980e+00   2.5819660e+01  -9.2199284e+00
   2.4137520e+01  -2.6039027e+01   5.0000000e+01   5.8081634e+00   2.3830295e+01  -3.0542100e+00
   2.4214996e+01  -2.5930524e+01   5.0000000e+01   5.6879326e+00   2.1129108e+01   4.4091739e+00
   2.4283534e+01  -2.5817298e+01   5.0000000e+01   1.4581210e+00   1.7100020e+01   1.1310281e+01
   2.4342803e+01  -2.5699936e+01   5.0000000e+01  -7.2658043e+00   1.2598494e+01   1.5030036e+01
   2.4392524e+01  -2.5579048e+01   5.0000000e+01  -1.9246951e+01   1.0850287e+01   1.4164918e+01
   2.4432471e+01  -2.5455260e+01   5.0000000e+01  -3.2824876e+01   1.4741935e+01   8.8651400e+00
   2.4462467e+01  -2.5329209e+01   5.0000000e+01  -4.5030186e+01   2.3011947e+01  -1.1621056e+00
   2.4482391e+01  -2.5201543e+01   5.0000000e+01  -5.2105436e+01   3.1351377e+01  -1.5193931e+01
   2.4492172e+01  -2.5072917e+01   5.0000000e+01  -5.2617396e+01   3.6862078e+01  -3.2106269e+01
   2.4491793e+01  -2.4943986e+01   5.0000000e+01  -4.5052837e+01   3.9585318e+01  -5.0752178e+01
   2.4481286e+01  -2.4815408e+01   5.0000000e+01  -2.8653077e+01   3.9886917e+01  -6.5737977e+01
   2.4460738e+01  -2.4687835e+01   5.0000000e+01  -8.4902984e+00   3.7487475e+01  -7.1090215e+01
   2.4430282e+01  -2.4561912e+01   5.0000000e+01   8.2703640e+00   3.2717068e+01  -6.7118555e+01
   2.4390102e+01  -2.4438274e+01   5.0000000e+01   1.8238753e+01   2.6492273e+01  -5.8350769e+01
   2.4340427e+01  -2.4317543e+01   5.0000000e+01   2.1860597e+01   1.9682970e+01  -4.9422979e+01
   2.4281532e+01  -2.4200325e+01   5.0000000e+01   2.2150703e+01   1.2831499e+01  -4.3102583e+01
   2.4213738e+01  -2.4087206e+01   5.0000000e+01   2.2481455e+01   6.3136456e+00  -3.9117814e+01
   2.4137403e+01  -2.3978750e+01   5.0000000e+01   2.4206659e+01   5.3993995e-01  -3.5463887e+01
   2.4052930e+01  -2.3875497e+01   5.0000000e+01   2.6404611e+01  -4.0964736e+00  -3.0613800e+01
   2.3960755e+01  -2.3777959e+01   5.0000000e+01   2.7291718e+01  -7.4096040e+00  -2.4831385e+01
   2.3861352e+01  -2.3686621e+01   5.0000000e+01   2.6112219e+01  -9.6948652e+00  -1.9713403e+01
   2.3755225e+01  -2.3601934e+01   5.0000000e+01   2.3717520e+01  -1.1684696e+01  -1.6591004e+01
   2.3642911e+01  -2.3524316e+01   5.0000000e+01   2.1691779e+01  -1.4411921e+01  -1.5352882e+01
   2.3524973e+01  -2.3454149e+01   5.0000000e+01   2.0954751e+01  -1.8505757e+01  -1.4257342e+01
   2.3401998e+01  -2.3391780e+01   5.0000000e+01   2.1117749e+01  -2.3413970e+01  -1.1445344e+01
   2.3274596e+01  -2.3337513e+01   5.0000000e+01   2.1199192e+01  -2.7865108e+01  -6.4436630e+00
   2.3143399e+01  -2.3291616e+01   5.0000000e+01   2.0665855e+01  -3.0939665e+01  -7.1436461e-02
   2.3009050e+01  -2.3254314e+01   5.0000000e+01   1.9893911e+01  -3.2386579e+01   7.0088789e+00
   2.2872211e+01  -2.3225789e+01   5.0000000e+01   1.9386530e+01  -3.1535610e+01   1.4637702e+01
   2.2733552e+01  -2.3206182e+01   5.0000000e+01   1.9089388e+01  -2.7558087e+01   2.1485875e+01
   2.2593752e+01  -2.3195587e+01   5.0000000e+01   1.8915274e+01  -2.1065297e+01   2.5264268e+01
   2.2453493e+01  -2.3194058e+01   5.0000000e+01   1.9039265e+01  -1.4102217e+01   2.4367384e+01
   2.1717233e+01  -2.3201844e+01   5.0000000e+01   2.4819374e+01  -3.6424111e+01   9.6869712e+00
   2.1589456e+01  -2.3252610e+01   5.0000000e+01   2.8443176e+01  -3.7489652e+01   1.7806246e+01
   2.1465502e+01  -2.3310923e+01   5.0000000e+01   3.3263075e+01  -3.2488162e+01   2.3231776e+01
   2.1345895e+01  -2.3376537e+01   5.0000000e+01   3.7818590e+01  -2.4630340e+01   2.3359487e+01
   2.1231146e+01  -2.3449175e+01   5.0000000e+01   4.0801447e+01  -1.7366269e+01   1.8989411e+01
   2.1121746e+01  -2.3528533e+01   5.0000000e+01   4.1850681e+01  -1.2531621e+01   1.2744998e+01
   2.1018166e+01  -2.3614274e+01   5.0000000e+01   4.1572355e+01  -1.0017099e+01   7.1500089e+00
   2.0920855e+01  -2.3706036e+01   5.0000000e+01   4.1115206e+01  -8.4520868e+00   3.2983110e+00
   2.0830238e+01  -2.3803431e+01   5.0000000e+01   4.1443542e+01  -6.3561103e+00   4.3228270e-01
   2.0746715e+01  -2.3906044e+01   5.0000000e+01   4.2492522e+01  -3.2856344e+00  -3.3438234e+00
   2.0670657e+01  -2.4013440e+01   5.0000000e+01   4.2945822e+01  -2.0824129e-01  -9.4078497e+00
   2.0602407e+01  -2.4125160e+01   5.0000000e+01   4.1168112e+01   1.1794538e+00  -1.7266080e+01
   2.0542276e+01  -2.4240728e+01   5.0000000e+01   3.6671052e+01  -2.6618692e-01  -2.4796880e+01
   2.0490546e+01  -2.4359647e+01   5.0000000e+01   3.0484369e+01  -4.1637828e+00  -3.0004185e+01
   2.0447460e+01  -2.4481407e+01   5.0000000e+01   2.3974265e+01  -8.7421950e+00  -3.2287819e+01
   2.0413229e+01  -2.4605485e+01   5.0000000e+01   1.7839237e+01  -1.1888930e+01  -3.1978823e+01
   2.0388028e+01  -2.4731343e+01   5.0000000e+01   1.2425327e+01  -1.2227775e+01  -2.9392440e+01
   2.0371993e+01  -2.4858436e+01   5.0000000e+01   8.3393205e+00  -9.6539393e+00  -2.4909826e+01
   2.0365222e+01  -2.4986213e+01   5.0000000e+01   5.9929785e+00  -5.3739275e+00  -1.9438173e+01
   2.0367773e+01  -2.5114117e+01   5.0000000e+01   5.1949608e+00  -1.4591395e+00  -1.3805915e+01
   2.0379663e+01  -2.5241588e+01   5.0000000e+01   5.7491657e+00   2.0680542e-01  -8.5148520e+00
   2.0400871e+01  -2.5368068e+01   5.0000000e+01   7.5666631e+00  -1.3535695e+00  -3.9692468e+00
   2.0431332e+01  -2.5492999e+01   5.0000000e+01   1.1123605e+01  -6.2571653e+00  -7.8539396e-01
   2.0470940e+01  -2.5615832e+01   5.0000000e+01   1.6802757e+01  -1.3686125e+01  -1.0109646e+00
   2.0519549e+01  -2.5736021e+01   5.0000000e+01   2.2662112e+01  -2.2057083e+01  -6.8507637e+00
   2.0576970e+01  -2.5853033e+01   5.0000000e+01   2.5354999e+01  -2.9707672e+01  -1.7424421e+01
   2.0642973e+01  -2.5966347e+01   5.0000000e+01   2.4051640e+01  -3.5605322e+01  -2.9177840e+01
   2.0717289e+01  -2.6075456e+01   5.0000000e+01   2.1068061e+01  -3.9238617e+01  -4.0432355e+01
   2.0799606e+01  -2.6179872e+01   5.0000000e+01   1.7432072e+01  -3.9451235e+01  -5.2430130e+01
   2.0889578e+01  -2.6279124e+01   5.0000000e+01   1.1220852e+01  -3.4793248e+01  -6.4592098e+01
   2.0986819e+01  -2.6372765e+01   5.0000000e+01   1.4237246e+00  -2.5654838e+01  -7.3037284e+01
   2.1090905e+01  -2.6460372e+01   5.0000000e+01  -9.9221607e+00  -1.4346118e+01  -7.4626231e+01
   2.1201383e+01  -2.6541549e+01   5.0000000e+01  -1.9727211e+01  -3.4113987e+00  -6.9070555e+01
   2.1317763e+01  -2.6615925e+01   5.0000000e+01  -2.5732991e+01   4.7293076e+00  -5.8290839e+01
   2.1439528e+01  -2.6683162e+01   5.0000000e+01  -2.7396129e+01   8.4854733e+00  -4.6093853e+01
   2.1566131e+01  -2.6742955e+01   5.0000000e+01  -2.6228304e+01   8.3964850e+00  -3.6205240e+01
   2.1697003e+01  -2.6795028e+01   5.0000000e+01  -2.4531756e+01   6.1867661e+00  -3.0069661e+01
   2.1831550e+01  -2.6839145e+01   5.0000000e+01  -2.3951606e+01   3.3108408e+00  -2.7369149e+01
   2.1969161e+01  -2.6875102e+01   5.0000000e+01  -2.5140091e+01   6.0750296e-01  -2.7224123e+01
   2.2109206e+01  -2.6902734e+01   5.0000000e+01  -2.8038389e+01  -1.5720861e+00  -2.9113172e+01
   2.2251046e+01  -2.6921915e+01   5.0000000e+01  -3.2415510e+01  -2.5182698e+00  -3.2968181e+01
   2.2394029e+01  -2.6932557e+01   5.0000000e+01  -3.7935958e+01  -8.7546487e-01  -3.8101546e+01
   2.2537499e+01  -2.6934610e+01   5.0000000e+01  -4.3913271e+01   4.3635133e+00  -4.2355361e+01
   2.2680797e+01  -2.6928065e+01   5.0000000e+01  -4.9294647e+01   1.1625751e+01  -4.3117687e+01
   2.2823264e+01  -2.6912952e+01   5.0000000e+01  -5.2369413e+01   1.7317896e+01  -4.1068005e+01
   2.2964246e+01  -2.6889341e+01   5.0000000e+01  -5.1432254e+01   2.0730278e+01  -3.9250105e+01
   2.3103099e+01  -2.6857339e+01   5.0000000e+01  -4.6948597e+01   2.3584531e+01  -3.8056081e+01
   2.3239186e+01  -2.6817095e+01   5.0000000e+01  -4.1062332e+01   2.6488228e+01  -3.6598373e+01
   2.3371887e+01  -2.6768793e+01   5.0000000e+01  -3.4775858e+01   2.9619887e+01  -3.4571490e+01
   2.3500601e+01  -2.6712653e+01   5.0000000e+01  -2.8152526e+01   3.2368014e+01  -3.1352071e+01
   2.3624745e+01  -2.6648934e+01   5.0000000e+01  -2.1706291e+01   3.3458108e+01  -2.7243923e+01
   2.3743763e+01  -2.6577925e+01   5.0000000e+01  -1.6151135e+01   3.2723527e+01  -2.3183137e+01
   2.3857121e+01  -2.6499951e+01   5.0000000e+01  -1.1779219e+01   3.0696343e+01  -1.9793204e+01
   2.3964317e+01  -2.6415367e+01   5.0000000e+01  -8.0892744e+00   2.8155962e+01  -1.7391791e+01
   2.4064881e+01  -2.6324555e+01   5.0000000e+01  -4.3006212e+00   2.5935287e+01  -1.5399031e+01
   2.4158373e+01  -2.6227927e+01   5.0000000e+01  -2.5231555e-01   2.4261519e+01  -1.2511481e+01
   2.4244391e+01  -2.6125919e+01   5.0000000e+01   3.2158442e+00   2.2766180e+01  -7.8039155e+00
   2.4322568e+01  -2.6018991e+01   5.0000000e+01   4.5424910e+00   2.1185820e+01  -1.5331074e+00
   2.4392575e+01  -2.5907622e+01   5.0000000e+01   2.0811817e+00   1.9588989e+01   4.7966730e+00
   2.4454124e+01  -2.5792311e+01   5.0000000e+01  -4.5220024e+00   1.8383269e+01   8.5810893e+00
   2.4506966e+01  -2.5673573e+01   5.0000000e+01  -1.2972579e+01   1.8828635e+01   8.6670709e+00
   2.4550892e+01  -2.5551935e+01   5.0000000e+01  -2.1455460e+01   2.1965138e+01   7.4908391e+00
   2.4585736e+01  -2.5427937e+01   5.0000000e+01  -3.1087527e+01   2.6960085e+01   5.9802126e+00
   2.4611372e+01  -2.5302127e+01   5.0000000e+01  -4.1329205e+01   3.1782321e+01   8.1846391e-01
   2.4627716e+01  -2.5175060e+01   5.0000000e+01  -4.8506234e+01   3.5019374e+01  -1.0328257e+01
   2.4634725e+01  -2.5047293e+01   5.0000000e+01  -4.9084686e+01   3.7140151e+01  -2.6444616e+01
   2.4632399e+01  -2.4919386e+01   5.0000000e+01  -4.0959427e+01   3.9216515e+01  -4.3582067e+01
   2.4620777e+01  -2.4791896e+01   5.0000000e+01  -2.5431006e+01   4.0516759e+01  -5.5858497e+01
   2.4599937e+01  -2.4665380e+01   5.0000000e+01  -7.9046887e+00   3.9543909e+01  -5.9644039e+01
   2.4569998e+01  -2.4540385e+01   5.0000000e+01   6.0176606e+00   3.6036438e+01  -5.6170505e+01
   2.4531116e+01  -2.4417453e+01   5.0000000e+01   1.3918256e+01   3.0659257e+01  -4.9289498e+01
   2.4483484e+01  -2.4297112e+01   5.0000000e+01   1.6448065e+01   2.4263471e+01  -4.2795785e+01
   2.4427330e+01  -2.4179882e+01   5.0000000e+01   1.6424081e+01   1.7406872e+01  -3.8887194e+01
   2.4362920e+01  -2.4066264e+01   5.0000000e+01   1.7002262e+01   1.0382163e+01  -3.6991021e+01
   2.4290548e+01  -2.3956746e+01   5.0000000e+01   1.9439364e+01   3.7576695e+00  -3.4840770e+01
   2.4210544e+01  -2.3851793e+01   5.0000000e+01   2.2678386e+01  -1.7202484e+00  -3.0730078e+01
   2.4123266e+01  -2.3751854e+01   5.0000000e+01   2.4665121e+01  -5.5698502e+00  -2.4846286e+01
   2.4029099e+01  -2.3657353e+01   5.0000000e+01   2.4260331e+01  -7.8754205e+00  -1.9079085e+01
   2.3928457e+01  -2.3568691e+01   5.0000000e+01   2.2079771e+01  -9.3561446e+00  -1.5281349e+01
   2.3821778e+01  -2.3486242e+01   5.0000000e+01   1.9639154e+01  -1.0974050e+01  -1.3894143e+01
   2.3709522e+01  -2.3410356e+01   5.0000000e+01   1.8161053e+01  -1.3650199e+01  -1.3881850e+01
   2.3592172e+01  -2.3341352e+01   5.0000000e+01   1.7864987e+01  -1.7728810e+01  -1.3384734e+01
   2.3470229e+01  -2.3279522e+01   5.0000000e+01   1.8126414e+01  -2.2531339e+01  -1.1058268e+01
   2.3344211e+01  -2.3225124e+01   5.0000000e+01   1.8226661e+01  -2.6845273e+01  -6.8573929e+00
   2.3214650e+01  -2.3178389e+01   5.0000000e+01   1.7907822e+01  -2.9921465e+01  -1.6879782e+00
   2.3082095e+01  -2.3139511e+01   5.0000000e+01   1.7422832e+01  -3.1882648e+01   4.0509166e+00
   2.2947102e+01  -2.3108655e+01   5.0000000e+01   1.6862508e+01  -3.2332663e+01   1.0932273e+01
   2.2810237e+01  -2.3085949e+01   5.0000000e+01   1.6006179e+01  -2.9987942e+01   1.8291606e+01
   2.2672075e+01  -2.3071488e+01   5.0000000e+01   1.5019706e+01  -2.4710303e+01   2.3761976e+01
   2.2533193e+01  -2.3065334e+01   5.0000000e+01   1.4488131e+01  -1.8011673e+01   2.5364402e+01
   2.2394173e+01  -2.3067512e+01   5.0000000e+01   1.4878139e+01  -1.2196252e+01   2.2387463e+01
   2.2255595e+01  -2.3078012e+01   5.0000000e+01   1.6275717e+01  -9.8996517e+00   1.5793667e+01
   2.2118039e+01  -2.3096791e+01   5.0000000e+01   1.8401099e+01  -1.2726079e+01   8.4381855e+00
   2.1982081e+01  -2.3123771e+01   5.0000000e+01   2.0660235e+01  -2.0062379e+01   3.6490115e+00
   2.1848292e+01  -2.3158837e+01   5.0000000e+01   2.2595435e+01  -2.9351885e+01   3.8995827e+00
   2.1145197e+01  -2.3348129e+01   5.0000000e+01   4.8781431e+01  -2.1021119e+01   2.2403072e+01
   2.1034417e+01  -2.3428449e+01   5.0000000e+01   5.0104901e+01  -1.7076249e+01   1.4310682e+01
   2.0929208e+01  -2.3514920e+01   5.0000000e+01   4.9495840e+01  -1.5353562e+01   7.2976418e+00
   2.0829984e+01  -2.3607211e+01   5.0000000e+01   4.8393161e+01  -1.4281767e+01   2.5062656e+00
   2.0737135e+01  -2.3704970e+01   5.0000000e+01   4.8090432e+01  -1.2274095e+01  -9.7514290e-01
   2.0651028e+01  -2.3807824e+01   5.0000000e+01   4.8728533e+01  -8.7713370e+00  -5.3551931e+00
   2.0572011e+01  -2.3915378e+01   5.0000000e+01   4.8936535e+01  -4.6658211e+00  -1.2399764e+01
   2.0500403e+01  -2.4027220e+01   5.0000000e+01   4.6632849e+01  -1.8491244e+00  -2.1761352e+01
   2.0436500e+01  -2.4142920e+01   5.0000000e+01   4.0844375e+01  -1.9840930e+00  -3.0696645e+01
   2.0380567e+01  -2.4262030e+01   5.0000000e+01   3.2921190e+01  -5.1975105e+00  -3.6094272e+01
   2.0332845e+01  -2.4384091e+01   5.0000000e+01   2.5435552e+01  -9.9213451e+00  -3.7042765e+01
   2.0293540e+01  -2.4508629e+01   5.0000000e+01   1.9969042e+01  -1.3953871e+01  -3.5020568e+01
   2.0262832e+01  -2.4635160e+01   5.0000000e+01   1.6445632e+01  -1.5545605e+01  -3.1968770e+01
   2.0240865e+01  -2.4763189e+01   5.0000000e+01   1.4157056e+01  -1.3862948e+01  -2.8953826e+01
   2.0227752e+01  -2.4892218e+01   5.0000000e+01   1.2521681e+01  -9.2227222e+00  -2.6428598e+01
   2.0223573e+01  -2.5021738e+01   5.0000000e+01   1.0757419e+01  -3.2094981e+00  -2.4321169e+01
   2.0228372e+01  -2.5151242e+01   5.0000000e+01   8.5566814e+00   1.8890740e+00  -2.1602742e+01
   2.0242159e+01  -2.5280216e+01   5.0000000e+01   6.6643646e+00   4.3189639e+00  -1.7613235e+01
   2.0264908e+01  -2.5408150e+01   5.0000000e+01   5.8523126e+00   3.3261153e+00  -1.2430504e+01
   2.0296556e+01  -2.5534537e+01   5.0000000e+01   7.4161915e+00  -1.2874117e+00  -6.9644836e+00
   2.0337006e+01  -2.5658872e+01   5.0000000e+01   1.1927543e+01  -8.9981219e+00  -4.3659243e+00
   2.0386124e+01  -2.5780658e+01   5.0000000e+01   1.6869620e+01  -1.8283348e+01  -7.4506032e+00
   2.0443739e+01  -2.5899405e+01   5.0000000e+01   1.8845507e+01  -2.7209750e+01  -1.5098563e+01
   2.0509646e+01  -2.6014637e+01   5.0000000e+01   1.7611784e+01  -3.4565695e+01  -2.3768548e+01
   2.0583602e+01  -2.6125888e+01   5.0000000e+01   1.5808432e+01  -4.0072873e+01  -3.2475781e+01
   2.0665331e+01  -2.6232708e+01   5.0000000e+01   1.4133752e+01  -4.2774246e+01  -4.3469367e+01
   2.0754524e+01  -2.6334661e+01   5.0000000e+01   9.8297584e+00  -4.0596041e+01  -5.6704692e+01
   2.0850836e+01  -2.6431334e+01   5.0000000e+01   1.1190024e+00  -3.2923155e+01  -6.7525247e+01
   2.0953892e+01  -2.6522331e+01   5.0000000e+01  -9.9556299e+00  -2.2004448e+01  -7.1521193e+01
   2.1063287e+01  -2.6607279e+01   5.0000000e+01  -1.9926644e+01  -1.0772844e+01  -6.8208732e+01
   2.1178586e+01  -2.6685829e+01   5.0000000e+01  -2.6459739e+01  -1.3507952e+00  -5.9425836e+01
   2.1299326e+01  -2.6757658e+01   5.0000000e+01  -2.8710185e+01   4.6017409e+00  -4.8089377e+01
   2.1425020e+01  -2.6822469e+01   5.0000000e+01  -2.7659380e+01   6.7857932e+00  -3.7751115e+01
   2.1555157e+01  -2.6879996e+01   5.0000000e+01  -2.5541567e+01   6.5499630e+00  -3.0452491e+01
   2.1689206e+01  -2.6929998e+01   5.0000000e+01  -2.4202965e+01   5.3522940e+00  -2.6153223e+01
   2.1826617e+01  -2.6972270e+01   5.0000000e+01  -2.4510651e+01   4.0581290e+00  -2.4019682e+01
   2.1966823e+01  -2.7006635e+01   5.0000000e+01  -2.6613550e+01   2.9837159e+00  -2.3258381e+01
   2.2109244e+01  -2.7032950e+01   5.0000000e+01  -3.0325123e+01   2.2633089e+00  -2.3697074e+01
   2.2253289e+01  -2.7051107e+01   5.0000000e+01  -3.5346059e+01   2.5753904e+00  -2.5387721e+01
   2.2398361e+01  -2.7061029e+01   5.0000000e+01  -4.1060626e+01   4.9720591e+00  -2.7817012e+01
   2.2543856e+01  -2.7062675e+01   5.0000000e+01  -4.6544063e+01   1.0167809e+01  -2.9308859e+01
   2.2689169e+01  -2.7056037e+01   5.0000000e+01  -5.0988514e+01   1.6206205e+01  -2.7543132e+01
   2.2833694e+01  -2.7041145e+01   5.0000000e+01  -5.3603818e+01   1.8898015e+01  -2.4065177e+01
   2.2976832e+01  -2.7018060e+01   5.0000000e+01  -5.3184021e+01   1.8416900e+01  -2.3547780e+01
   2.3117987e+01  -2.6986877e+01   5.0000000e+01  -4.9282876e+01   1.8741997e+01  -2.6018295e+01
   2.3256577e+01  -2.6947727e+01   5.0000000e+01  -4.3301156e+01   2.0838509e+01  -2.8217606e+01
   2.3392029e+01  -2.6900773e+01   5.0000000e+01  -3.6775483e+01   2.3665622e+01  -2.9041416e+01
   2.3523785e+01  -2.6846208e+01   5.0000000e+01  -3.0393749e+01   2.6521238e+01  -2.8283333e+01
   2.3651306e+01  -2.6784261e+01   5.0000000e+01  -2.4634318e+01   2.8442938e+01  -2.6091199e+01
   2.3774074e+01  -2.6715185e+01   5.0000000e+01  -1.9717401e+01   2.9056993e+01  -2.3127768e+01
   2.3891591e+01  -2.6639268e+01   5.0000000e+01  -1.5760313e+01   2.8383584e+01  -1.9970953e+01
   2.4003384e+01  -2.6556821e+01   5.0000000e+01  -1.2617813e+01   2.6690926e+01  -1.7563875e+01
   2.4109009e+01  -2.6468184e+01   5.0000000e+01  -9.5900311e+00   2.4817559e+01  -1.6335844e+01
   2.4208047e+01  -2.6373721e+01   5.0000000e+01  -6.0737056e+00   2.3359470e+01  -1.5459982e+01
   2.4300111e+01  -2.6273816e+01   5.0000000e+01  -2.0987763e+00   2.2202075e+01  -1.3683750e+01
   2.4384844e+01  -2.6168879e+01   5.0000000e+01   1.6735967e+00   2.1172813e+01  -1.0151185e+01
   2.4461924e+01  -2.6059335e+01   5.0000000e+01   3.8872132e+00   2.0665572e+01  -4.5456677e+00
   2.4531059e+01  -2.5945630e+01   5.0000000e+01   2.5629793e+00   2.1179213e+01   2.3964802e+00
   2.4591995e+01  -2.5828222e+01   5.0000000e+01  -3.0129411e+00   2.2925955e+01   8.1622749e+00
   2.4644510e+01  -2.5707585e+01   5.0000000e+01  -1.0381711e+01   2.5977670e+01   1.1133890e+01
   2.4688422e+01  -2.5584204e+01   5.0000000e+01  -1.7526958e+01   2.9661819e+01   1.3067611e+01
   2.4723581e+01  -2.5458573e+01   5.0000000e+01  -2.6201989e+01   3.2686047e+01   1.4438746e+01
   2.4749874e+01  -2.5331192e+01   5.0000000e+01  -3.7080750e+01   3.4314215e+01   1.1283225e+01
   2.4767226e+01  -2.5202570e+01   5.0000000e+01  -4.6125387e+01   3.4800046e+01   3.7666082e-01
   2.4775596e+01  -2.5073216e+01   5.0000000e+01  -4.8097142e+01   3.5395436e+01  -1.6415360e+01
   2.4774981e+01  -2.4943641e+01   5.0000000e+01  -4.0976969e+01   3.7221350e+01  -3.3313493e+01
   2.4765409e+01  -2.4814356e+01   5.0000000e+01  -2.7212888e+01   3.9459612e+01  -4.4908927e+01
   2.4746948e+01  -2.4685869e+01   5.0000000e+01  -1.1590424e+01   4.0254717e+01  -4.9011017e+01
   2.4719697e+01  -2.4558683e+01   5.0000000e+01   1.1932830e+00   3.8741086e+01  -4.6723872e+01
   2.4683788e+01  -2.4433295e+01   5.0000000e+01   8.6131926e+00   3.5044789e+01  -4.1410780e+01
   2.4639386e+01  -2.4310193e+01   5.0000000e+01   1.1011520e+01   2.9746754e+01  -3.6515929e+01
   2.4586688e+01  -2.4189855e+01   5.0000000e+01   1.0651241e+01   2.3464913e+01  -3.4154604e+01
   2.4525921e+01  -2.4072746e+01   5.0000000e+01   1.0611575e+01   1.6374996e+01  -3.4299592e+01
   2.4457340e+01  -2.3959319e+01   5.0000000e+01   1.2996713e+01   8.8135179e+00  -3.4608947e+01
   2.4381229e+01  -2.3850011e+01   5.0000000e+01   1.7266418e+01   1.8983516e+00  -3.2358766e+01
   2.4297899e+01  -2.3745241e+01   5.0000000e+01   2.0885777e+01  -3.3208614e+00  -2.7038135e+01
   2.4207686e+01  -2.3645412e+01   5.0000000e+01   2.1891670e+01  -6.5818249e+00  -2.0566635e+01
   2.4110948e+01  -2.3550906e+01   5.0000000e+01   2.0389967e+01  -8.2890547e+00  -1.5489296e+01
   2.4008069e+01  -2.3462082e+01   5.0000000e+01   1.7945757e+01  -9.3164045e+00  -1.3061519e+01
   2.3899452e+01  -2.3379281e+01   5.0000000e+01   1.5984150e+01  -1.0602303e+01  -1.2813208e+01
   2.3785519e+01  -2.3302816e+01   5.0000000e+01   1.4994329e+01  -1.2977072e+01  -1.3412097e+01
   2.3666711e+01  -2.3232978e+01   5.0000000e+01   1.4755887e+01  -1.6830193e+01  -1.3355700e+01
   2.3543485e+01  -2.3170032e+01   5.0000000e+01   1.4891534e+01  -2.1611120e+01  -1.1570868e+01
   2.3416313e+01  -2.3114217e+01   5.0000000e+01   1.5122597e+01  -2.6094105e+01  -7.8869703e+00
   2.3285681e+01  -2.3065743e+01   5.0000000e+01   1.5365066e+01  -2.9373393e+01  -3.0230308e+00
   2.3152084e+01  -2.3024795e+01   5.0000000e+01   1.5667651e+01  -3.1447177e+01   2.4767883e+00
   2.3016028e+01  -2.2991526e+01   5.0000000e+01   1.5581232e+01  -3.2169380e+01   8.9131068e+00
   2.2878028e+01  -2.2966062e+01   5.0000000e+01   1.4462943e+01  -3.0585985e+01   1.5882789e+01
   2.2738605e+01  -2.2948500e+01   5.0000000e+01   1.2641775e+01  -2.6372887e+01   2.1555123e+01
   2.2598284e+01  -2.2938904e+01   5.0000000e+01   1.1185934e+01  -2.0570545e+01   2.4220308e+01
   2.2457593e+01  -2.2937313e+01   5.0000000e+01   1.0885314e+01  -1.4908150e+01   2.3103274e+01
   2.2317061e+01  -2.2943731e+01   5.0000000e+01   1.1908272e+01  -1.1617277e+01   1.8464353e+01
   2.2177218e+01  -2.2958135e+01   5.0000000e+01   1.3939406e+01  -1.2729247e+01   1.2209153e+01
   2.2038590e+01  -2.2980470e+01   5.0000000e+01   1.6475955e+01  -1.8468730e+01   7.2424318e+00
   2.1901700e+01  -2.3010651e+01   5.0000000e+01   1.9079442e+01  -2.7230457e+01   5.7451308e+00
   2.1767065e+01  -2.3048566e+01   5.0000000e+01   2.1789090e+01  -3.6483763e+01   9.0560041e+00
   2.1635195e+01  -2.3094070e+01   5.0000000e+01   2.5626688e+01  -4.2429390e+01   1.7002139e+01
   2.1506590e+01  -2.3146993e+01   5.0000000e+01   3.1490342e+01  -4.1930806e+01   2.5812769e+01
   2.1381739e+01  -2.3207133e+01   5.0000000e+01   3.8531485e+01  -3.5803328e+01   3.0437852e+01
   2.1261121e+01  -2.3274263e+01   5.0000000e+01   4.4796639e+01  -2.7718955e+01   2.8815417e+01
   2.0628649e+01  -2.3624577e+01   5.0000000e+01   5.6148453e+01  -1.9132040e+01   4.1629296e+00
   2.0542963e+01  -2.3726459e+01   5.0000000e+01   5.7000348e+01  -1.5843859e+01  -1.3533684e+00
   2.0463818e+01  -2.3832726e+01   5.0000000e+01   5.7522329e+01  -1.1897444e+01  -1.0054559e+01
   2.0391495e+01  -2.3943022e+01   5.0000000e+01   5.5308919e+01  -9.1267435e+00  -2.1714657e+01
   2.0326254e+01  -2.4056978e+01   5.0000000e+01   4.8771498e+01  -9.1595459e+00  -3.3230805e+01
   2.0268331e+01  -2.4174209e+01   5.0000000e+01   3.8993348e+01  -1.2161466e+01  -4.0496565e+01
   2.0217943e+01  -2.4294321e+01   5.0000000e+01   2.9252761e+01  -1.6663556e+01  -4.1660904e+01
   2.0175281e+01  -2.4416908e+01   5.0000000e+01   2.2414431e+01  -2.0635433e+01  -3.8315128e+01
   2.0140511e+01  -2.4541555e+01   5.0000000e+01   1.9158143e+01  -2.2564710e+01  -3.3596543e+01
   2.0113776e+01  -2.4667837e+01   5.0000000e+01   1.8491702e+01  -2.1673038e+01  -2.9997057e+01
   2.0095189e+01  -2.4795325e+01   5.0000000e+01   1.8894430e+01  -1.7846188e+01  -2.8741460e+01
   2.0084841e+01  -2.4923582e+01   5.0000000e+01   1.8679690e+01  -1.1816076e+01  -2.9936514e+01
   2.0082791e+01  -2.5052169e+01   5.0000000e+01   1.6237430e+01  -5.1580964e+00  -3.2015442e+01
   2.0089074e+01  -2.5180644e+01   5.0000000e+01   1.1781125e+01   3.1485818e-01  -3.2218685e+01
   2.0103693e+01  -2.5308563e+01   5.0000000e+01   7.1462048e+00   3.4315532e+00  -2.9343246e+01
   2.0126625e+01  -2.5435483e+01   5.0000000e+01   3.7152626e+00   3.8100448e+00  -2.3611804e+01
   2.0157816e+01  -2.5560964e+01   5.0000000e+01   3.0485595e+00   1.1386746e+00  -1.6128259e+01
   2.0197183e+01  -2.5684569e+01   5.0000000e+01   5.7840545e+00  -4.7915071e+00  -1.0221721e+01
   2.0244615e+01  -2.5805866e+01   5.0000000e+01   9.6455214e+00  -1.3224866e+01  -8.9796176e+00
   2.0299970e+01  -2.5924428e+01   5.0000000e+01   1.1609652e+01  -2.2374869e+01  -1.2087373e+01
   2.0363078e+01  -2.6039840e+01   5.0000000e+01   1.1155340e+01  -3.0652908e+01  -1.6852103e+01
   2.0433738e+01  -2.6151694e+01   5.0000000e+01   1.0408520e+01  -3.7671348e+01  -2.2143978e+01
   2.0511723e+01  -2.6259594e+01   5.0000000e+01   1.0474606e+01  -4.3073752e+01  -3.0095840e+01
   2.0596777e+01  -2.6363157e+01   5.0000000e+01   9.0573611e+00  -4.4965514e+01  -4.2198143e+01
   2.0688616e+01  -2.6462014e+01   5.0000000e+01   3.3059806e+00  -4.1245789e+01  -5.5316429e+01
   2.0786929e+01  -2.6555812e+01   5.0000000e+01  -6.3135148e+00  -3.2433401e+01  -6.3906326e+01
   2.0891382e+01  -2.6644216e+01   5.0000000e+01  -1.6530285e+01  -2.1513648e+01  -6.5277972e+01
   2.1001613e+01  -2.6726907e+01   5.0000000e+01  -2.4464116e+01  -1.1207917e+01  -6.0494884e+01
   2.1117239e+01  -2.6803589e+01   5.0000000e+01  -2.8715284e+01  -3.0858724e+00  -5.1816091e+01
   2.1237854e+01  -2.6873984e+01   5.0000000e+01  -2.9112690e+01   1.9739939e+00  -4.1951422e+01
   2.1363032e+01  -2.6937839e+01   5.0000000e+01  -2.7022322e+01   4.3066899e+00  -3.3540162e+01
   2.1492327e+01  -2.6994921e+01   5.0000000e+01  -2.4556557e+01   5.1515524e+00  -2.7605766e+01
   2.1625278e+01  -2.7045024e+01   5.0000000e+01  -2.3174061e+01   5.4611653e+00  -2.3727429e+01
   2.1761406e+01  -2.7087966e+01   5.0000000e+01  -2.3395729e+01   5.6913042e+00  -2.1168431e+01
   2.1900221e+01  -2.7123590e+01   5.0000000e+01  -2.5150455e+01   6.0165610e+00  -1.9285341e+01
   2.2041219e+01  -2.7151766e+01   5.0000000e+01  -2.8183689e+01   6.4293613e+00  -1.7822093e+01
   2.2183888e+01  -2.7172392e+01   5.0000000e+01  -3.2231446e+01   7.1926537e+00  -1.6906481e+01
   2.2327710e+01  -2.7185392e+01   5.0000000e+01  -3.6896122e+01   8.9154749e+00  -1.6580219e+01
   2.2472160e+01  -2.7190719e+01   5.0000000e+01  -4.1703926e+01   1.2400822e+01  -1.6438329e+01
   2.2616712e+01  -2.7188354e+01   5.0000000e+01  -4.6215003e+01   1.7507767e+01  -1.4722615e+01
   2.2760838e+01  -2.7178304e+01   5.0000000e+01  -5.0074516e+01   2.0814307e+01  -1.0441886e+01
   2.2904013e+01  -2.7160607e+01   5.0000000e+01  -5.2688073e+01   1.9181502e+01  -7.4927885e+00
   2.3045716e+01  -2.7135328e+01   5.0000000e+01  -5.2756764e+01   1.5599310e+01  -1.0099048e+01
   2.3185431e+01  -2.7102558e+01   5.0000000e+01  -4.9548831e+01   1.4677502e+01  -1.6190010e+01
   2.3322653e+01  -2.7062417e+01   5.0000000e+01  -4.4203377e+01   1.6603120e+01  -2.1689374e+01
   2.3456885e+01  -2.7015051e+01   5.0000000e+01  -3.8282417e+01   1.9870560e+01  -2.5173296e+01
   2.3587643e+01  -2.6960633e+01   5.0000000e+01  -3.2609774e+01   2.3332618e+01  -2.6151822e+01
   2.3714460e+01  -2.6899360e+01   5.0000000e+01  -2.7517109e+01   2.5701825e+01  -2.4961704e+01
   2.3836884e+01  -2.6831455e+01   5.0000000e+01  -2.2909269e+01   2.6553673e+01  -2.2657343e+01
   2.3954480e+01  -2.6757162e+01   5.0000000e+01  -1.8810724e+01   2.6038627e+01  -2.0014736e+01
   2.4066835e+01  -2.6676751e+01   5.0000000e+01  -1.5446866e+01   2.4566608e+01  -1.7965902e+01
   2.4173557e+01  -2.6590510e+01   5.0000000e+01  -1.2636273e+01   2.3067820e+01  -1.7191315e+01
   2.4274276e+01  -2.6498750e+01   5.0000000e+01  -9.9212325e+00   2.2298281e+01  -1.7270070e+01
   2.4368646e+01  -2.6401800e+01   5.0000000e+01  -7.0366625e+00   2.2061963e+01  -1.7172642e+01
   2.4456347e+01  -2.6300007e+01   5.0000000e+01  -3.7210475e+00   2.1759887e+01  -1.6154029e+01
   2.4537086e+01  -2.6193732e+01   5.0000000e+01   1.5168593e-01   2.1517973e+01  -1.3382160e+01
   2.4610595e+01  -2.6083355e+01   5.0000000e+01   3.5323085e+00   2.2020440e+01  -7.5716294e+00
   2.4676637e+01  -2.5969265e+01   5.0000000e+01   3.9408404e+00   2.3454318e+01   1.3144611e+00
   2.4734999e+01  -2.5851867e+01   5.0000000e+01   3.7869773e-02   2.5461634e+01   1.0557343e+01
   2.4785500e+01  -2.5731573e+01   5.0000000e+01  -6.3060311e+00   2.7732090e+01   1.7444409e+01
   2.4827988e+01  -2.5608807e+01   5.0000000e+01  -1.3239457e+01   2.9976861e+01   2.2199291e+01
   2.4862338e+01  -2.5483997e+01   5.0000000e+01  -2.2186321e+01   3.1741125e+01   2.4906650e+01
   2.4888458e+01  -2.5357578e+01   5.0000000e+01  -3.3921988e+01   3.2617591e+01   2.2124929e+01
   2.4906283e+01  -2.5229992e+01   5.0000000e+01  -4.4321076e+01   3.2891886e+01   1.0688338e+01
   2.4915777e+01  -2.5101678e+01   5.0000000e+01  -4.7362605e+01   3.3692633e+01  -7.0954920e+00
   2.4916933e+01  -2.4973082e+01   5.0000000e+01  -4.1025348e+01   3.5747008e+01  -2.4338685e+01
   2.4909775e+01  -2.4844645e+01   5.0000000e+01  -2.8613165e+01   3.8287842e+01  -3.5613537e+01
   2.4894352e+01  -2.4716810e+01   5.0000000e+01  -1.4692442e+01   3.9872354e+01  -3.9778572e+01
   2.4870742e+01  -2.4590012e+01   5.0000000e+01  -2.9776550e+00   3.9693967e+01  -3.8042902e+01
   2.4839050e+01  -2.4464685e+01   5.0000000e+01   4.0396204e+00   3.7683348e+01  -3.3337053e+01
   2.4799409e+01  -2.4341255e+01   5.0000000e+01   6.3766041e+00   3.4099833e+01  -2.9060264e+01
   2.4751974e+01  -2.4220141e+01   5.0000000e+01   5.7880822e+00   2.9356869e+01  -2.7224995e+01
   2.4696929e+01  -2.4101753e+01   5.0000000e+01   4.6139945e+00   2.3580695e+01  -2.8445962e+01
   2.4634479e+01  -2.3986490e+01   5.0000000e+01   5.4460031e+00   1.6531333e+01  -3.1571680e+01
   2.4564853e+01  -2.3874741e+01   5.0000000e+01   9.4950705e+00   8.6277323e+00  -3.3301047e+01
   2.4488303e+01  -2.3766879e+01   5.0000000e+01   1.4794457e+01   1.4067545e+00  -3.0851872e+01
   2.4405102e+01  -2.3663268e+01   5.0000000e+01   1.8176916e+01  -3.8675206e+00  -2.5040885e+01
   2.4315542e+01  -2.3564252e+01   5.0000000e+01   1.8520305e+01  -7.0572823e+00  -1.8849158e+01
   2.4219935e+01  -2.3470163e+01   5.0000000e+01   1.6921037e+01  -8.6342281e+00  -1.4589446e+01
   2.4118612e+01  -2.3381312e+01   5.0000000e+01   1.5077924e+01  -9.3455459e+00  -1.2796760e+01
   2.4011919e+01  -2.3297997e+01   5.0000000e+01   1.3841866e+01  -9.9825607e+00  -1.2695889e+01
   2.3900219e+01  -2.3220492e+01   5.0000000e+01   1.3099779e+01  -1.1290318e+01  -1.3395504e+01
   2.3783890e+01  -2.3149056e+01   5.0000000e+01   1.2558683e+01  -1.3991179e+01  -1.4188946e+01
   2.3663323e+01  -2.3083923e+01   5.0000000e+01   1.2275289e+01  -1.8283896e+01  -1.4065727e+01
   2.3538921e+01  -2.3025309e+01   5.0000000e+01   1.2337739e+01  -2.3269410e+01  -1.1983325e+01
   2.3411099e+01  -2.2973408e+01   5.0000000e+01   1.2597718e+01  -2.7661155e+01  -7.8609207e+00
   2.3280279e+01  -2.2928390e+01   5.0000000e+01   1.3091741e+01  -3.0844947e+01  -2.2794626e+00
   2.3146896e+01  -2.2890403e+01   5.0000000e+01   1.3716815e+01  -3.2463495e+01   4.4184369e+00
   2.3011388e+01  -2.2859574e+01   5.0000000e+01   1.3616234e+01  -3.1867442e+01   1.1532716e+01
   2.2874203e+01  -2.2836002e+01   5.0000000e+01   1.2183943e+01  -2.8955452e+01   1.7602538e+01
   2.2735790e+01  -2.2819766e+01   5.0000000e+01   1.0069214e+01  -2.4521843e+01   2.1494071e+01
   2.2596604e+01  -2.2810919e+01   5.0000000e+01   8.4266200e+00  -1.9551719e+01   2.2829192e+01
   2.2457102e+01  -2.2809489e+01   5.0000000e+01   7.9225891e+00  -1.5082782e+01   2.1433270e+01
   2.2317740e+01  -2.2815482e+01   5.0000000e+01   8.5494411e+00  -1.2726479e+01   1.7469628e+01
   2.2178975e+01  -2.2828878e+01   5.0000000e+01   9.9559574e+00  -1.4218440e+01   1.2357719e+01
   2.2041264e+01  -2.2849633e+01   5.0000000e+01   1.1873261e+01  -1.9916617e+01   8.5153978e+00
   2.1905057e+01  -2.2877679e+01   5.0000000e+01   1.4265391e+01  -2.8559389e+01   7.8267007e+00
   2.1770803e+01  -2.2912923e+01   5.0000000e+01   1.7236886e+01  -3.8328784e+01   1.1411416e+01
   2.1638945e+01  -2.2955249e+01   5.0000000e+01   2.1346322e+01  -4.6353158e+01   1.9938330e+01
   2.1509917e+01  -2.3004519e+01   5.0000000e+01   2.7545892e+01  -4.8860696e+01   3.1295546e+01
   2.1384148e+01  -2.3060570e+01   5.0000000e+01   3.5767224e+01  -4.4737530e+01   4.0265169e+01
   2.1262056e+01  -2.3123216e+01   5.0000000e+01   4.4373152e+01  -3.6821793e+01   4.2817286e+01
   2.1144048e+01  -2.3192253e+01   5.0000000e+01   5.1445654e+01  -2.9093652e+01   3.8759931e+01
   2.1030521e+01  -2.3267450e+01   5.0000000e+01   5.5907699e+01  -2.3969825e+01   3.0638144e+01
   2.0921856e+01  -2.3348559e+01   5.0000000e+01   5.7623403e+01  -2.1707133e+01   2.1553902e+01
   2.0818423e+01  -2.3435312e+01   5.0000000e+01   5.7288794e+01  -2.1205653e+01   1.3871573e+01
   2.0720575e+01  -2.3527420e+01   5.0000000e+01   5.6331824e+01  -2.0809158e+01   8.4476782e+00
   2.0199822e+01  -2.4001405e+01   5.0000000e+01   5.5436825e+01  -1.8543041e+01  -3.0681835e+01
   2.0141510e+01  -2.4118786e+01   5.0000000e+01   4.4341119e+01  -2.2638806e+01  -3.8924507e+01
   2.0090327e+01  -2.4238925e+01   5.0000000e+01   3.3059545e+01  -2.7370780e+01  -4.0020853e+01
   2.0046449e+01  -2.4361457e+01   5.0000000e+01   2.5141437e+01  -3.0866410e+01  -3.5792611e+01
   2.0010028e+01  -2.4486012e+01   5.0000000e+01   2.1762040e+01  -3.2071866e+01  -2.9988667e+01
   1.9981199e+01  -2.4612209e+01   5.0000000e+01   2.2037593e+01  -3.0723704e+01  -2.5827799e+01
   1.9960072e+01  -2.4739664e+01   5.0000000e+01   2.4114066e+01  -2.7007314e+01  -2.5219810e+01
   1.9946734e+01  -2.4867988e+01   5.0000000e+01   2.5663152e+01  -2.1528305e+01  -2.8640834e+01
   1.9941251e+01  -2.4996785e+01   5.0000000e+01   2.4232225e+01  -1.5299756e+01  -3.4621843e+01
   1.9943665e+01  -2.5125660e+01   5.0000000e+01   1.8926050e+01  -9.4102104e+00  -3.9528458e+01
   1.9953993e+01  -2.5254214e+01   5.0000000e+01   1.1791353e+01  -4.7225146e+00  -4.0352193e+01
   1.9972227e+01  -2.5382048e+01   5.0000000e+01   5.2945177e+00  -1.6352052e+00  -3.6926421e+01
   1.9998337e+01  -2.5508767e+01   5.0000000e+01   8.5481413e-01  -3.2117004e-01  -3.0128805e+01
   2.0032267e+01  -2.5633974e+01   5.0000000e+01  -3.2004588e-01  -1.4311764e+00  -2.1819860e+01
   2.0073934e+01  -2.5757277e+01   5.0000000e+01   1.3506833e+00  -5.6618939e+00  -1.5077332e+01
   2.0123232e+01  -2.5878290e+01   5.0000000e+01   3.6710174e+00  -1.2597120e+01  -1.1770853e+01
   2.0180029e+01  -2.5996631e+01   5.0000000e+01   4.8410035e+00  -2.0635159e+01  -1.1448570e+01
   2.0244169e+01  -2.6111927e+01   5.0000000e+01   5.0148752e+00  -2.8344716e+01  -1.2560947e+01
   2.0315471e+01  -2.6223812e+01   5.0000000e+01   5.7753306e+00  -3.5438276e+01  -1.5093881e+01
   2.0393729e+01  -2.6331930e+01   5.0000000e+01   7.3138703e+00  -4.1568552e+01  -2.1318743e+01
   2.0478713e+01  -2.6435937e+01   5.0000000e+01   7.1106662e+00  -4.4845104e+01  -3.2489356e+01
   2.0570170e+01  -2.6535500e+01   5.0000000e+01   2.4600253e+00  -4.2921161e+01  -4.5697230e+01
   2.0667823e+01  -2.6630299e+01   5.0000000e+01  -6.3321310e+00  -3.5696684e+01  -5.5501301e+01
   2.0771375e+01  -2.6720030e+01   5.0000000e+01  -1.6190880e+01  -2.5784007e+01  -5.8609870e+01
   2.0880505e+01  -2.6804403e+01   5.0000000e+01  -2.4120442e+01  -1.6075048e+01  -5.5511478e+01
   2.0994874e+01  -2.6883145e+01   5.0000000e+01  -2.8527758e+01  -8.1958280e+00  -4.8377079e+01
   2.1114122e+01  -2.6956002e+01   5.0000000e+01  -2.8999638e+01  -2.8203447e+00  -3.9809235e+01
   2.1237872e+01  -2.7022735e+01   5.0000000e+01  -2.6579341e+01   4.0262216e-01  -3.2326086e+01
   2.1365730e+01  -2.7083129e+01   5.0000000e+01  -2.3333409e+01   2.5975014e+00  -2.6943352e+01
   2.1497286e+01  -2.7136986e+01   5.0000000e+01  -2.0956142e+01   4.5409488e+00  -2.3125026e+01
   2.1632116e+01  -2.7184130e+01   5.0000000e+01  -2.0188728e+01   6.3426873e+00  -2.0054391e+01
   2.1769783e+01  -2.7224407e+01   5.0000000e+01  -2.0999239e+01   7.8995695e+00  -1.7274591e+01
   2.1909840e+01  -2.7257685e+01   5.0000000e+01  -2.2936982e+01   9.2237429e+00  -1.4603706e+01
   2.2051831e+01  -2.7283854e+01   5.0000000e+01  -2.5586082e+01   1.0411853e+01  -1.2024235e+01
   2.2195291e+01  -2.7302829e+01   5.0000000e+01  -2.8673176e+01   1.1684707e+01  -9.7371308e+00
   2.2339751e+01  -2.7314548e+01   5.0000000e+01  -3.1981735e+01   1.3605447e+01  -7.9576635e+00
   2.2484736e+01  -2.7318972e+01   5.0000000e+01  -3.5501878e+01   1.7074183e+01  -6.1879163e+00
   2.2629772e+01  -2.7316086e+01   5.0000000e+01  -3.9371145e+01   2.1796879e+01  -2.5101693e+00
   2.2774382e+01  -2.7305899e+01   5.0000000e+01  -4.3663351e+01   2.4097950e+01   3.7802175e+00
   2.2918092e+01  -2.7288447e+01   5.0000000e+01  -4.7884308e+01   2.0612631e+01   8.2235430e+00
   2.3060430e+01  -2.7263784e+01   5.0000000e+01  -5.0445073e+01   1.4378457e+01   5.5634522e+00
   2.3200932e+01  -2.7231994e+01   5.0000000e+01  -4.9899857e+01   1.1217950e+01  -2.8967843e+00
   2.3339140e+01  -2.7193180e+01   5.0000000e+01  -4.6810206e+01   1.2568614e+01  -1.1979867e+01
   2.3474603e+01  -2.7147468e+01   5.0000000e+01  -4.2723480e+01   1.6477121e+01  -1.8686626e+01
   2.3606883e+01  -2.7095010e+01   5.0000000e+01  -3.8331942e+01   2.0843670e+01  -2.2072708e+01
   2.3735554e+01  -2.7035976e+01   5.0000000e+01  -3.3808197e+01   2.3827294e+01  -2.2523790e+01
   2.3860202e+01  -2.6970559e+01   5.0000000e+01  -2.9216508e+01   2.4860966e+01  -2.1591600e+01
   2.3980429e+01  -2.6898972e+01   5.0000000e+01  -2.4656102e+01   2.4482895e+01  -2.0386082e+01
   2.4095855e+01  -2.6821447e+01   5.0000000e+01  -2.0465795e+01   2.3333229e+01  -1.9506444e+01
   2.4206117e+01  -2.6738237e+01   5.0000000e+01  -1.6927815e+01   2.2316976e+01  -1.9406287e+01
   2.4310869e+01  -2.6649610e+01   5.0000000e+01  -1.4069841e+01   2.2464309e+01  -1.9874889e+01
   2.4409789e+01  -2.6555852e+01   5.0000000e+01  -1.1925285e+01   2.3812553e+01  -1.9959598e+01
   2.4502573e+01  -2.6457265e+01   5.0000000e+01  -1.0312781e+01   2.5106706e+01  -1.9317945e+01
   2.4588941e+01  -2.6354166e+01   5.0000000e+01  -8.1792015e+00   2.5531199e+01  -1.8332590e+01
   2.4668634e+01  -2.6246885e+01   5.0000000e+01  -4.3673350e+00   2.5546145e+01  -1.6247542e+01
   2.4741417e+01  -2.6135763e+01   5.0000000e+01   6.0854142e-01   2.5717087e+01  -1.0825523e+01
   2.4807080e+01  -2.6021155e+01   5.0000000e+01   3.9023734e+00   2.5788015e+01  -1.0239992e+00
   2.4865436e+01  -2.5903424e+01   5.0000000e+01   2.8960159e+00   2.5346483e+01   1.0522598e+01
   2.4916324e+01  -2.5782941e+01   5.0000000e+01  -1.6721404e+00   2.4757816e+01   1.9908604e+01
   2.4959606e+01  -2.5660088e+01   5.0000000e+01  -7.5059748e+00   2.4866332e+01   2.6442859e+01
   2.4995171e+01  -2.5535249e+01   5.0000000e+01  -1.5365541e+01   2.5860161e+01   3.1192919e+01
   2.5022932e+01  -2.5408816e+01   5.0000000e+01  -2.7062893e+01   2.7101578e+01   3.1397827e+01
   2.5042827e+01  -2.5281183e+01   5.0000000e+01  -3.9343110e+01   2.8449565e+01   2.2531901e+01
   2.5054820e+01  -2.5152747e+01   5.0000000e+01  -4.5322894e+01   3.0677051e+01   5.5634682e+00
   2.5058898e+01  -2.5023907e+01   5.0000000e+01  -4.1614058e+01   3.4050283e+01  -1.2443565e+01
   2.5055074e+01  -2.4895061e+01   5.0000000e+01  -3.1082021e+01   3.7524039e+01  -2.5012424e+01
   2.5043384e+01  -2.4766605e+01   5.0000000e+01  -1.8525349e+01   3.9804232e+01  -3.0570548e+01
   2.5023889e+01  -2.4638934e+01   5.0000000e+01  -7.3144026e+00   4.0297965e+01  -3.0183273e+01
   2.4996672e+01  -2.4512440e+01   5.0000000e+01   1.8330029e-02   3.9114735e+01  -2.6043739e+01
   2.4961839e+01  -2.4387508e+01   5.0000000e+01   2.6893336e+00   3.6628889e+01  -2.1513046e+01
   2.4919517e+01  -2.4264519e+01   5.0000000e+01   2.0827126e+00   3.3153209e+01  -1.9055664e+01
   2.4869858e+01  -2.4143846e+01   5.0000000e+01   6.9111287e-02   2.8866078e+01  -1.9635180e+01
   2.4813030e+01  -2.4025855e+01   5.0000000e+01  -1.2325500e+00   2.3548444e+01  -2.3439819e+01
   2.4749225e+01  -2.3910902e+01   5.0000000e+01   6.4468571e-01   1.6734549e+01  -2.8779828e+01
   2.4678653e+01  -2.3799333e+01   5.0000000e+01   6.0929477e+00   8.8322992e+00  -3.1587361e+01
   2.4601542e+01  -2.3691484e+01   5.0000000e+01   1.1879854e+01   1.4837529e+00  -2.9353642e+01
   2.4518139e+01  -2.3587677e+01   5.0000000e+01   1.4834127e+01  -3.9861827e+00  -2.4002310e+01
   2.4428707e+01  -2.3488223e+01   5.0000000e+01   1.4935893e+01  -7.4191191e+00  -1.8807540e+01
   2.4333526e+01  -2.3393420e+01   5.0000000e+01   1.3965934e+01  -9.1821838e+00  -1.5355040e+01
   2.4232891e+01  -2.3303550e+01   5.0000000e+01   1.3313670e+01  -9.7564849e+00  -1.3508142e+01
   2.4127110e+01  -2.3218880e+01   5.0000000e+01   1.3082085e+01  -9.7449827e+00  -1.2678024e+01
   2.4016507e+01  -2.3139661e+01   5.0000000e+01   1.2782391e+01  -9.8741834e+00  -1.2716428e+01
   2.3901417e+01  -2.3066128e+01   5.0000000e+01   1.2226403e+01  -1.0982930e+01  -1.3756156e+01
   2.3782186e+01  -2.2998499e+01   5.0000000e+01   1.1822519e+01  -1.3960911e+01  -1.5208590e+01
   2.3659173e+01  -2.2936974e+01   5.0000000e+01   1.1927315e+01  -1.8689442e+01  -1.5310696e+01
   2.3532744e+01  -2.2881734e+01   5.0000000e+01   1.2177207e+01  -2.3789776e+01  -1.2940345e+01
   2.3403276e+01  -2.2832943e+01   5.0000000e+01   1.2229891e+01  -2.8285050e+01  -8.3940489e+00
   2.3271152e+01  -2.2790743e+01   5.0000000e+01   1.2285440e+01  -3.1766576e+01  -1.8255104e+00
   2.3136763e+01  -2.2755261e+01   5.0000000e+01   1.2246063e+01  -3.2995365e+01   6.4204960e+00
   2.3000505e+01  -2.2726598e+01   5.0000000e+01   1.1438432e+01  -3.1001628e+01   1.4195668e+01
   2.2862778e+01  -2.2704841e+01   5.0000000e+01   9.6862614e+00  -2.6876782e+01   1.9285764e+01
   2.2723987e+01  -2.2690053e+01   5.0000000e+01   7.6622495e+00  -2.2325986e+01   2.1488235e+01
   2.2584540e+01  -2.2682277e+01   5.0000000e+01   6.1598849e+00  -1.8131602e+01   2.1522240e+01
   2.2444845e+01  -2.2681537e+01   5.0000000e+01   5.5500711e+00  -1.4704141e+01   1.9596951e+01
   2.2305312e+01  -2.2687833e+01   5.0000000e+01   5.6955840e+00  -1.3212318e+01   1.5683153e+01
   2.2166349e+01  -2.2701149e+01   5.0000000e+01   6.3071016e+00  -1.5319052e+01   1.0916223e+01
   2.2028364e+01  -2.2721445e+01   5.0000000e+01   7.3379921e+00  -2.1509218e+01   7.6670196e+00
   2.1891764e+01  -2.2748660e+01   5.0000000e+01   8.9605233e+00  -3.0613323e+01   7.9680338e+00
   2.1756948e+01  -2.2782716e+01   5.0000000e+01   1.1352255e+01  -4.0906739e+01   1.2927581e+01
   2.1624315e+01  -2.2823512e+01   5.0000000e+01   1.4902198e+01  -4.9911312e+01   2.3219640e+01
   2.1494256e+01  -2.2870928e+01   5.0000000e+01   2.0503305e+01  -5.3935290e+01   3.7352320e+01
   2.1367156e+01  -2.2924823e+01   5.0000000e+01   2.8639208e+01  -5.0973144e+01   5.0393408e+01
   2.1243394e+01  -2.2985041e+01   5.0000000e+01   3.8253917e+01  -4.3058935e+01   5.7281882e+01
   2.1123337e+01  -2.3051401e+01   5.0000000e+01   4.7338978e+01  -3.4422357e+01   5.6514614e+01
   2.1007347e+01  -2.3123709e+01   5.0000000e+01   5.4419061e+01  -2.8282552e+01   5.0158847e+01
   2.0895771e+01  -2.3201751e+01   5.0000000e+01   5.9043928e+01  -2.5417836e+01   4.1330990e+01
   2.0788949e+01  -2.3285295e+01   5.0000000e+01   6.1298818e+01  -2.4968294e+01   3.2460205e+01
   2.0687205e+01  -2.3374093e+01   5.0000000e+01   6.1767622e+01  -2.5450512e+01   2.5107508e+01
   2.0590851e+01  -2.3467881e+01   5.0000000e+01   6.1697280e+01  -2.5336701e+01   1.9542224e+01
   2.0500185e+01  -2.3566380e+01   5.0000000e+01   6.2345586e+01  -2.3735397e+01   1.4377117e+01
   2.0415492e+01  -2.3669296e+01   5.0000000e+01   6.3887802e+01  -2.0862699e+01   7.2692870e+00
   2.0337036e+01  -2.3776322e+01   5.0000000e+01   6.4856040e+01  -1.7988493e+01  -3.5080223e+00
   2.0265068e+01  -2.3887135e+01   5.0000000e+01   6.2642301e+01  -1.6844442e+01  -1.7355840e+01
   1.9872619e+01  -2.4456908e+01   5.0000000e+01   2.4453717e+01  -3.9814373e+01  -1.9949342e+01
   1.9843646e+01  -2.4582259e+01   5.0000000e+01   2.5654082e+01  -3.7736764e+01  -1.6441131e+01
   1.9821870e+01  -2.4708814e+01   5.0000000e+01   2.8834803e+01  -3.4031851e+01  -1.7095124e+01
   1.9807371e+01  -2.4836229e+01   5.0000000e+01   3.1456510e+01  -2.9354753e+01  -2.2429560e+01
   1.9800211e+01  -2.4964157e+01   5.0000000e+01   3.0825357e+01  -2.4407278e+01  -3.1027323e+01
   1.9800432e+01  -2.5092250e+01   5.0000000e+01   2.5578511e+01  -1.9633999e+01  -3.9335248e+01
   1.9808056e+01  -2.5220157e+01   5.0000000e+01   1.7313488e+01  -1.5190479e+01  -4.3674288e+01
   1.9823087e+01  -2.5347527e+01   5.0000000e+01   9.0570379e+00  -1.1190982e+01  -4.3126538e+01
   1.9845505e+01  -2.5474009e+01   5.0000000e+01   2.5312851e+00  -7.7401449e+00  -3.8777170e+01
   1.9875274e+01  -2.5599254e+01   5.0000000e+01  -1.5149951e+00  -5.3595585e+00  -3.1930191e+01
   1.9912332e+01  -2.5722915e+01   5.0000000e+01  -2.9254807e+00  -5.1546409e+00  -2.4356579e+01
   1.9956600e+01  -2.5844648e+01   5.0000000e+01  -2.5570462e+00  -7.8711631e+00  -1.7764189e+01
   2.0007978e+01  -2.5964113e+01   5.0000000e+01  -1.5064267e+00  -1.3080456e+01  -1.3056087e+01
   2.0066343e+01  -2.6080976e+01   5.0000000e+01  -4.2406990e-01  -1.9431373e+01  -1.0290637e+01
   2.0131552e+01  -2.6194910e+01   5.0000000e+01   9.4691619e-01  -2.5871097e+01  -9.0779781e+00
   2.0203442e+01  -2.6305592e+01   5.0000000e+01   3.3144832e+00  -3.2254183e+01  -1.0109853e+01
   2.0281830e+01  -2.6412711e+01   5.0000000e+01   5.9841206e+00  -3.8212168e+01  -1.5373985e+01
   2.0366512e+01  -2.6515963e+01   5.0000000e+01   6.3813454e+00  -4.2053692e+01  -2.5633057e+01
   2.0457264e+01  -2.6615054e+01   5.0000000e+01   2.2020609e+00  -4.1586543e+01  -3.8199418e+01
   2.0553845e+01  -2.6709702e+01   5.0000000e+01  -6.1725080e+00  -3.6284392e+01  -4.8128071e+01
   2.0655992e+01  -2.6799637e+01   5.0000000e+01  -1.5854075e+01  -2.8075383e+01  -5.1982614e+01
   2.0763428e+01  -2.6884600e+01   5.0000000e+01  -2.3758922e+01  -1.9612254e+01  -4.9750745e+01
   2.0875855e+01  -2.6964348e+01   5.0000000e+01  -2.8047762e+01  -1.2576189e+01  -4.3537345e+01
   2.0992960e+01  -2.7038650e+01   5.0000000e+01  -2.8228993e+01  -7.5782240e+00  -3.6067658e+01
   2.1114417e+01  -2.7107293e+01   5.0000000e+01  -2.5273175e+01  -4.2510648e+00  -2.9844061e+01
   2.1239880e+01  -2.7170077e+01   5.0000000e+01  -2.1171979e+01  -1.4491221e+00  -2.5848267e+01
   2.1368996e+01  -2.7226821e+01   5.0000000e+01  -1.7679502e+01   1.6934577e+00  -2.3291763e+01
   2.1501393e+01  -2.7277360e+01   5.0000000e+01  -1.5701589e+01   5.1771512e+00  -2.0916229e+01
   2.1636693e+01  -2.7321546e+01   5.0000000e+01  -1.5448435e+01   8.4425467e+00  -1.7965616e+01
   2.1774505e+01  -2.7359252e+01   5.0000000e+01  -1.6556093e+01   1.0921793e+01  -1.4458289e+01
   2.1914431e+01  -2.7390367e+01   5.0000000e+01  -1.8338032e+01   1.2616351e+01  -1.0862882e+01
   2.2056064e+01  -2.7414799e+01   5.0000000e+01  -2.0327055e+01   1.3921202e+01  -7.4583048e+00
   2.2198993e+01  -2.7432479e+01   5.0000000e+01  -2.2390821e+01   1.5127383e+01  -4.4575087e+00
   2.2342800e+01  -2.7443353e+01   5.0000000e+01  -2.4458576e+01   1.6837217e+01  -2.1066573e+00
   2.2487067e+01  -2.7447391e+01   5.0000000e+01  -2.6513296e+01   2.0124267e+01   2.9426589e-01
   2.2631371e+01  -2.7444580e+01   5.0000000e+01  -2.8850844e+01   2.4864720e+01   5.0371410e+00
   2.2775291e+01  -2.7434929e+01   5.0000000e+01  -3.2217900e+01   2.7392580e+01   1.3309202e+01
   2.2918408e+01  -2.7418466e+01   5.0000000e+01  -3.6928630e+01   2.3517747e+01   2.0712660e+01
   2.3060304e+01  -2.7395238e+01   5.0000000e+01  -4.1710006e+01   1.5275941e+01   2.0483272e+01
   2.3200566e+01  -2.7365315e+01   5.0000000e+01  -4.4542653e+01   9.4184580e+00   1.1917766e+01
   2.3338786e+01  -2.7328783e+01   5.0000000e+01  -4.4951557e+01   9.5524509e+00   6.4958687e-01
   2.3474565e+01  -2.7285749e+01   5.0000000e+01  -4.4164007e+01   1.3882905e+01  -8.2616247e+00
   2.3607511e+01  -2.7236338e+01   5.0000000e+01  -4.2792848e+01   1.8967144e+01  -1.3501150e+01
   2.3737242e+01  -2.7180694e+01   5.0000000e+01  -4.0435560e+01   2.2412489e+01  -1.5910910e+01
   2.3863387e+01  -2.7118979e+01   5.0000000e+01  -3.6954075e+01   2.3641973e+01  -1.7083434e+01
   2.3985587e+01  -2.7051372e+01   5.0000000e+01  -3.2711390e+01   2.3499788e+01  -1.8085875e+01
   2.4103496e+01  -2.6978068e+01   5.0000000e+01  -2.8289916e+01   2.2853572e+01  -1.9221492e+01
   2.4216785e+01  -2.6899280e+01   5.0000000e+01  -2.4094977e+01   2.2423016e+01  -2.0667422e+01
   2.4325137e+01  -2.6815234e+01   5.0000000e+01  -2.0269881e+01   2.3259504e+01  -2.2172027e+01
   2.4428253e+01  -2.6726171e+01   5.0000000e+01  -1.7133149e+01   2.6019685e+01  -2.2509661e+01
   2.4525851e+01  -2.6632348e+01   5.0000000e+01  -1.5375541e+01   2.9523420e+01  -2.0658870e+01
   2.4617666e+01  -2.6534033e+01   5.0000000e+01  -1.4992106e+01   3.1669975e+01  -1.7773318e+01
   2.4703453e+01  -2.6431505e+01   5.0000000e+01  -1.4330117e+01   3.1968751e+01  -1.5675774e+01
   2.4782984e+01  -2.6325057e+01   5.0000000e+01  -1.1520774e+01   3.1368247e+01  -1.3997059e+01
   2.4856053e+01  -2.6214991e+01   5.0000000e+01  -6.3152671e+00   3.0355446e+01  -1.0388774e+01
   2.4922472e+01  -2.6101616e+01   5.0000000e+01  -7.8754358e-01   2.8462491e+01  -2.9190966e+00
   2.4982074e+01  -2.5985254e+01   5.0000000e+01   1.9230660e+00   2.5438297e+01   7.4096887e+00
   2.5034713e+01  -2.5866231e+01   5.0000000e+01   6.5470498e-01   2.2153965e+01   1.7165440e+01
   2.5080263e+01  -2.5744879e+01   5.0000000e+01  -2.7963188e+00   1.9949210e+01   2.4422676e+01
   2.5118620e+01  -2.5621539e+01   5.0000000e+01  -7.5858022e+00   1.9317617e+01   3.0570316e+01
   2.5149700e+01  -2.5496552e+01   5.0000000e+01  -1.6098314e+01   1.9761036e+01   3.5182581e+01
   2.5173439e+01  -2.5370266e+01   5.0000000e+01  -2.8355466e+01   2.1162949e+01   3.3279155e+01
   2.5189795e+01  -2.5243029e+01   5.0000000e+01  -3.8563394e+01   2.4183562e+01   2.1972914e+01
   2.5198747e+01  -2.5115193e+01   5.0000000e+01  -4.0750442e+01   2.8970446e+01   5.5279242e+00
   2.5200293e+01  -2.4987107e+01   5.0000000e+01  -3.4742804e+01   3.4267576e+01  -8.8730219e+00
   2.5194453e+01  -2.4859124e+01   5.0000000e+01  -2.4667146e+01   3.8377706e+01  -1.7537536e+01
   2.5181265e+01  -2.4731592e+01   5.0000000e+01  -1.4218702e+01   4.0421533e+01  -2.0602651e+01
   2.5160787e+01  -2.4604858e+01   5.0000000e+01  -5.7429634e+00   4.0380025e+01  -1.9188585e+01
   2.5133098e+01  -2.4479266e+01   5.0000000e+01  -1.0894668e+00   3.8761325e+01  -1.5251150e+01
   2.5098292e+01  -2.4355155e+01   5.0000000e+01  -4.7496351e-01   3.6135709e+01  -1.1651229e+01
   2.5056485e+01  -2.4232861e+01   5.0000000e+01  -2.4312391e+00   3.2768761e+01  -1.0308422e+01
   2.5007809e+01  -2.4112712e+01   5.0000000e+01  -5.3136802e+00   2.8755230e+01  -1.1941208e+01
   2.4952412e+01  -2.3995031e+01   5.0000000e+01  -7.2441122e+00   2.3970769e+01  -1.6868959e+01
   2.4890461e+01  -2.3880133e+01   5.0000000e+01  -5.7263829e+00   1.7976296e+01  -2.3816330e+01
   2.4822137e+01  -2.3768323e+01   5.0000000e+01  -5.2799806e-02   1.0815235e+01  -2.8828256e+01
   2.4747639e+01  -2.3659901e+01   5.0000000e+01   6.5744402e+00   3.7144317e+00  -2.8872318e+01
   2.4667178e+01  -2.3555153e+01   5.0000000e+01   1.0582288e+01  -2.0158976e+00  -2.5386398e+01
   2.4580981e+01  -2.3454357e+01   5.0000000e+01   1.1770494e+01  -6.0693738e+00  -2.1475425e+01
   2.4489288e+01  -2.3357781e+01   5.0000000e+01   1.1941258e+01  -8.6851934e+00  -1.8439690e+01
   2.4392353e+01  -2.3265678e+01   5.0000000e+01   1.2380101e+01  -1.0067992e+01  -1.5851214e+01
   2.4290440e+01  -2.3178292e+01   5.0000000e+01   1.2950917e+01  -1.0313151e+01  -1.3263850e+01
   2.4183827e+01  -2.3095853e+01   5.0000000e+01   1.3049985e+01  -9.8398865e+00  -1.1262842e+01
   2.4072800e+01  -2.3018576e+01   5.0000000e+01   1.2660477e+01  -9.3698718e+00  -1.0641801e+01
   2.3957657e+01  -2.2946665e+01   5.0000000e+01   1.2262687e+01  -9.7542960e+00  -1.1746564e+01
   2.3838706e+01  -2.2880307e+01   5.0000000e+01   1.2501361e+01  -1.2045631e+01  -1.3685266e+01
   2.3716262e+01  -2.2819677e+01   5.0000000e+01   1.3336686e+01  -1.6245906e+01  -1.4307268e+01
   2.3590649e+01  -2.2764933e+01   5.0000000e+01   1.3948497e+01  -2.0990526e+01  -1.2515066e+01
   2.3462196e+01  -2.2716217e+01   5.0000000e+01   1.3808454e+01  -2.5441091e+01  -8.8052914e+00
   2.3331240e+01  -2.2673656e+01   5.0000000e+01   1.3015675e+01  -2.9583715e+01  -3.1407154e+00
   2.3198125e+01  -2.2637362e+01   5.0000000e+01   1.1745670e+01  -3.2159766e+01   4.9006923e+00
   2.3063198e+01  -2.2607429e+01   5.0000000e+01   1.0002980e+01  -3.1230144e+01   1.3400637e+01
   2.2926808e+01  -2.2583934e+01   5.0000000e+01   7.9638343e+00  -2.7339231e+01   1.9212655e+01
   2.2789312e+01  -2.2566939e+01   5.0000000e+01   6.0328798e+00  -2.2763818e+01   2.1519723e+01
   2.2651066e+01  -2.2556488e+01   5.0000000e+01   4.5481168e+00  -1.8804033e+01   2.1409873e+01
   2.2512428e+01  -2.2552608e+01   5.0000000e+01   3.6795927e+00  -1.5608695e+01   1.9754479e+01
   2.2373758e+01  -2.2555309e+01   5.0000000e+01   3.3738161e+00  -1.3464939e+01   1.6468612e+01
   2.2235415e+01  -2.2564584e+01   5.0000000e+01   3.4071282e+00  -1.3805222e+01   1.1643117e+01
   2.2097758e+01  -2.2580409e+01   5.0000000e+01   3.6620417e+00  -1.8098274e+01   7.0464410e+00
   2.1961144e+01  -2.2602743e+01   5.0000000e+01   4.2004352e+00  -2.6066413e+01   5.2944190e+00
   2.1825929e+01  -2.2631528e+01   5.0000000e+01   5.0634130e+00  -3.6076931e+01   8.0335730e+00
   2.1692463e+01  -2.2666689e+01   5.0000000e+01   6.3490939e+00  -4.6379975e+01   1.6030168e+01
   2.1561096e+01  -2.2708134e+01   5.0000000e+01   8.6724209e+00  -5.4455628e+01   2.9521201e+01
   2.1432169e+01  -2.2755756e+01   5.0000000e+01   1.3190813e+01  -5.7008969e+01   4.6366088e+01
   2.1306022e+01  -2.2809431e+01   5.0000000e+01   2.0581602e+01  -5.2748410e+01   6.1565581e+01
   2.1182986e+01  -2.2869017e+01   5.0000000e+01   3.0036136e+01  -4.3982489e+01   7.0348397e+01
   2.1063386e+01  -2.2934361e+01   5.0000000e+01   3.9639793e+01  -3.4900124e+01   7.1293116e+01
   2.0947538e+01  -2.3005290e+01   5.0000000e+01   4.7778121e+01  -2.8640008e+01   6.6520027e+01
   2.0835752e+01  -2.3081620e+01   5.0000000e+01   5.3962601e+01  -2.5839334e+01   5.9180312e+01
   2.0728326e+01  -2.3163150e+01   5.0000000e+01   5.8296709e+01  -2.5509260e+01   5.1369455e+01
   2.0625550e+01  -2.3249666e+01   5.0000000e+01   6.0950056e+01  -2.6243837e+01   4.4173439e+01
   2.0527703e+01  -2.3340941e+01   5.0000000e+01   6.2424226e+01  -2.6719412e+01   3.8008463e+01
   2.0435052e+01  -2.3436734e+01   5.0000000e+01   6.3676970e+01  -2.6095592e+01   3.2392254e+01
   2.0347853e+01  -2.3536793e+01   5.0000000e+01   6.5518516e+01  -2.4370654e+01   2.5848627e+01
   2.0266347e+01  -2.3640853e+01   5.0000000e+01   6.7700904e+01  -2.2434526e+01   1.6609276e+01
   2.0190764e+01  -2.3748638e+01   5.0000000e+01   6.8540255e+01  -2.1675257e+01   3.8860428e+00
   2.0121319e+01  -2.3859862e+01   5.0000000e+01   6.5560117e+01  -2.3278920e+01  -1.0844967e+01
   2.0058212e+01  -2.3974230e+01   5.0000000e+01   5.7466445e+01  -2.7352895e+01  -2.3711215e+01
   2.0001628e+01  -2.4091435e+01   5.0000000e+01   4.5871191e+01  -3.2627780e+01  -3.0693977e+01
   1.9951736e+01  -2.4211165e+01   5.0000000e+01   3.4624795e+01  -3.7212636e+01  -3.0576169e+01
   1.9908688e+01  -2.4333099e+01   5.0000000e+01   2.7137430e+01  -3.9733136e+01  -2.5711427e+01
   1.9658258e+01  -2.4964135e+01   5.0000000e+01   3.5054422e+01  -2.9737230e+01  -2.5767257e+01
   1.9658331e+01  -2.5092538e+01   5.0000000e+01   2.9308478e+01  -2.6632450e+01  -3.5668443e+01
   1.9665471e+01  -2.5220779e+01   5.0000000e+01   2.0572763e+01  -2.3384047e+01  -4.1563150e+01
   1.9679684e+01  -2.5348537e+01   5.0000000e+01   1.1889482e+01  -1.9710923e+01  -4.2726566e+01
   1.9700956e+01  -2.5475495e+01   5.0000000e+01   4.8952642e+00  -1.5609848e+01  -4.0479994e+01
   1.9729257e+01  -2.5601333e+01   5.0000000e+01  -2.5198293e-01  -1.1605067e+01  -3.6016113e+01
   1.9764537e+01  -2.5725737e+01   5.0000000e+01  -3.6732519e+00  -8.8541388e+00  -3.0097171e+01
   1.9806729e+01  -2.5848391e+01   5.0000000e+01  -5.5487679e+00  -8.4504719e+00  -2.3481224e+01
   1.9855750e+01  -2.5968986e+01   5.0000000e+01  -5.9745376e+00  -1.0716425e+01  -1.7056005e+01
   1.9911494e+01  -2.6087216e+01   5.0000000e+01  -5.1119170e+00  -1.5016117e+01  -1.1884009e+01
   1.9973842e+01  -2.6202779e+01   5.0000000e+01  -3.2429685e+00  -2.0243177e+01  -8.5476734e+00
   2.0042654e+01  -2.6315381e+01   5.0000000e+01  -3.1482162e-01  -2.5761363e+01  -7.3743590e+00
   2.0117773e+01  -2.6424733e+01   5.0000000e+01   3.3213092e+00  -3.1370420e+01  -9.5087555e+00
   2.0199024e+01  -2.6530553e+01   5.0000000e+01   5.7750742e+00  -3.6366764e+01  -1.6128909e+01
   2.0286214e+01  -2.6632570e+01   5.0000000e+01   4.5110460e+00  -3.9204467e+01  -2.6442465e+01
   2.0379135e+01  -2.6730519e+01   5.0000000e+01  -1.4477185e+00  -3.8305323e+01  -3.7120926e+01
   2.0477561e+01  -2.6824146e+01   5.0000000e+01  -1.0450573e+01  -3.3527606e+01  -4.4081112e+01
   2.0581251e+01  -2.6913208e+01   5.0000000e+01  -1.9337302e+01  -2.6582356e+01  -4.5208117e+01
   2.0689946e+01  -2.6997472e+01   5.0000000e+01  -2.5383516e+01  -1.9686386e+01  -4.1308986e+01
   2.0803374e+01  -2.7076718e+01   5.0000000e+01  -2.7301088e+01  -1.4225893e+01  -3.4942779e+01
   2.0921248e+01  -2.7150738e+01   5.0000000e+01  -2.5353770e+01  -1.0490628e+01  -2.8926314e+01
   2.1043269e+01  -2.7219339e+01   5.0000000e+01  -2.1081330e+01  -7.7861964e+00  -2.5172472e+01
   2.1169124e+01  -2.7282339e+01   5.0000000e+01  -1.6408282e+01  -4.8864861e+00  -2.3820436e+01
   2.1298486e+01  -2.7339571e+01   5.0000000e+01  -1.2651894e+01  -9.9188113e-01  -2.3549136e+01
   2.1431022e+01  -2.7390886e+01   5.0000000e+01  -1.0393331e+01   3.8221861e+00  -2.2784147e+01
   2.1566384e+01  -2.7436147e+01   5.0000000e+01  -9.7750273e+00   8.7731539e+00  -2.0425030e+01
   2.1704218e+01  -2.7475234e+01   5.0000000e+01  -1.0476789e+01   1.2675325e+01  -1.6334207e+01
   2.1844161e+01  -2.7508043e+01   5.0000000e+01  -1.1759890e+01   1.4933465e+01  -1.1589436e+01
   2.1985845e+01  -2.7534487e+01   5.0000000e+01  -1.3045129e+01   1.6193701e+01  -7.2604214e+00
   2.2128894e+01  -2.7554495e+01   5.0000000e+01  -1.4243766e+01   1.7168930e+01  -3.4926841e+00
   2.2272929e+01  -2.7568015e+01   5.0000000e+01  -1.5419544e+01   1.8167925e+01  -4.0376049e-01
   2.2417568e+01  -2.7575011e+01   5.0000000e+01  -1.6433155e+01   1.9994707e+01   1.9406807e+00
   2.2562425e+01  -2.7575463e+01   5.0000000e+01  -1.7075128e+01   2.3737105e+01   4.8687221e+00
   2.2707117e+01  -2.7569371e+01   5.0000000e+01  -1.7836520e+01   2.8287164e+01   1.1270550e+01
   2.2851258e+01  -2.7556750e+01   5.0000000e+01  -2.0181314e+01   2.8782967e+01   2.1149129e+01
   2.2994466e+01  -2.7537635e+01   5.0000000e+01  -2.4988738e+01   2.2256151e+01   2.8097515e+01
   2.3136361e+01  -2.7512076e+01   5.0000000e+01  -3.1023905e+01   1.3094406e+01   2.5824138e+01
   2.3276567e+01  -2.7480142e+01   5.0000000e+01  -3.5965729e+01   8.4185004e+00   1.5745773e+01
   2.3414714e+01  -2.7441917e+01   5.0000000e+01  -3.8998425e+01   1.0686006e+01   4.9030960e+00
   2.3550439e+01  -2.7397502e+01   5.0000000e+01  -4.1196166e+01   1.6428619e+01  -1.7040662e+00
   2.3683386e+01  -2.7347016e+01   5.0000000e+01  -4.2895644e+01   2.1076148e+01  -4.6487633e+00
   2.3813207e+01  -2.7290592e+01   5.0000000e+01  -4.3173600e+01   2.2991809e+01  -6.7363054e+00
   2.3939565e+01  -2.7228379e+01   5.0000000e+01  -4.1535009e+01   2.3111894e+01  -9.5937861e+00
   2.4062135e+01  -2.7160542e+01   5.0000000e+01  -3.8407462e+01   2.2900316e+01  -1.3108190e+01
   2.4180600e+01  -2.7087259e+01   5.0000000e+01  -3.4641029e+01   2.3016364e+01  -1.6637327e+01
   2.4294660e+01  -2.7008723e+01   5.0000000e+01  -3.0678969e+01   2.3840060e+01  -2.0024137e+01
   2.4404026e+01  -2.6925139e+01   5.0000000e+01  -2.6433661e+01   2.6380360e+01  -2.2677227e+01
   2.4508422e+01  -2.6836727e+01   5.0000000e+01  -2.2304696e+01   3.1068064e+01  -2.2616063e+01
   2.4607590e+01  -2.6743716e+01   5.0000000e+01  -1.9615297e+01   3.5995513e+01  -1.8541730e+01
   2.4701285e+01  -2.6646349e+01   5.0000000e+01  -1.9255994e+01   3.8459612e+01  -1.2507303e+01
   2.4789280e+01  -2.6544879e+01   5.0000000e+01  -1.9880753e+01   3.7972357e+01  -8.0933296e+00
   2.4871364e+01  -2.6439568e+01   5.0000000e+01  -1.8955316e+01   3.6062191e+01  -6.1439084e+00
   2.4947340e+01  -2.6330687e+01   5.0000000e+01  -1.5363381e+01   3.3801097e+01  -4.6552707e+00
   2.5017033e+01  -2.6218517e+01   5.0000000e+01  -9.8920299e+00   3.0897486e+01  -1.3639546e+00
   2.5080283e+01  -2.6103346e+01   5.0000000e+01  -4.5799447e+00   2.6777257e+01   4.5972408e+00
   2.5136947e+01  -2.5985467e+01   5.0000000e+01  -1.5910547e+00   2.1885970e+01   1.2205647e+01
   2.5186903e+01  -2.5865180e+01   5.0000000e+01  -1.5186906e+00   1.7547462e+01   1.9386624e+01
   2.5230044e+01  -2.5742792e+01   5.0000000e+01  -3.1497888e+00   1.4739743e+01   2.5487865e+01
   2.5266284e+01  -2.5618612e+01   5.0000000e+01  -6.7256557e+00   1.3314883e+01   3.1543832e+01
   2.5295552e+01  -2.5492953e+01   5.0000000e+01  -1.4450724e+01   1.3010533e+01   3.5908577e+01
   2.5317797e+01  -2.5366131e+01   5.0000000e+01  -2.5264684e+01   1.4555137e+01   3.3898165e+01
   2.5332986e+01  -2.5238464e+01   5.0000000e+01  -3.3414965e+01   1.8730957e+01   2.4063000e+01
   2.5341104e+01  -2.5110271e+01   5.0000000e+01  -3.4390717e+01   2.4895827e+01   1.0959824e+01
   2.5342152e+01  -2.4981871e+01   5.0000000e+01  -2.9060896e+01   3.1137066e+01   1.5989863e-01
   2.5336150e+01  -2.4853584e+01   5.0000000e+01  -2.0974529e+01   3.5835338e+01  -6.2485637e+00
   2.5323136e+01  -2.4725725e+01   5.0000000e+01  -1.2844030e+01   3.8407696e+01  -8.6288748e+00
   2.5303161e+01  -2.4598612e+01   5.0000000e+01  -6.4866821e+00   3.8863995e+01  -7.6950959e+00
   2.5276298e+01  -2.4472555e+01   5.0000000e+01  -3.4411357e+00   3.7557617e+01  -4.7917235e+00
   2.5242631e+01  -2.4347866e+01   5.0000000e+01  -3.9874617e+00   3.5069946e+01  -2.1916824e+00
   2.5202263e+01  -2.4224848e+01   5.0000000e+01  -6.9228408e+00   3.1798557e+01  -1.7263897e+00
   2.5155311e+01  -2.4103801e+01   5.0000000e+01  -1.0712896e+01   2.7854852e+01  -4.2115025e+00
   2.5101907e+01  -2.3985020e+01   5.0000000e+01  -1.3583270e+01   2.3261236e+01  -1.0028545e+01
   2.5042198e+01  -2.3868793e+01   5.0000000e+01  -1.3033997e+01   1.7863813e+01  -1.8358671e+01
   2.4976345e+01  -2.3755401e+01   5.0000000e+01  -7.6868880e+00   1.1551627e+01  -2.5692563e+01
   2.4904522e+01  -2.3645119e+01   5.0000000e+01  -6.2224729e-02   5.1176829e+00  -2.8303447e+01
   2.4826917e+01  -2.3538210e+01   5.0000000e+01   5.7340784e+00  -1.7845142e-01  -2.6658445e+01
   2.4743728e+01  -2.3434933e+01   5.0000000e+01   8.6163880e+00  -4.0118333e+00  -2.3878300e+01
   2.4655167e+01  -2.3335535e+01   5.0000000e+01   1.0108711e+01  -6.8200858e+00  -2.1462822e+01
   2.4561458e+01  -2.3240254e+01   5.0000000e+01   1.1453863e+01  -8.9430451e+00  -1.8896876e+01
   2.4462834e+01  -2.3149316e+01   5.0000000e+01   1.2537427e+01  -1.0346091e+01  -1.5426630e+01
   2.4359540e+01  -2.3062940e+01   5.0000000e+01   1.2649309e+01  -1.0777946e+01  -1.1608984e+01
   2.4251828e+01  -2.2981331e+01   5.0000000e+01   1.1897397e+01  -1.0487328e+01  -8.8611543e+00
   2.4139963e+01  -2.2904682e+01   5.0000000e+01   1.1066771e+01  -1.0065468e+01  -7.8538917e+00
   2.4024215e+01  -2.2833175e+01   5.0000000e+01   1.0868075e+01  -1.0202893e+01  -8.5407001e+00
   2.3904864e+01  -2.2766980e+01   5.0000000e+01   1.1655286e+01  -1.1859623e+01  -9.9339896e+00
   2.3782195e+01  -2.2706254e+01   5.0000000e+01   1.2936634e+01  -1.5214577e+01  -1.0212571e+01
   2.3656504e+01  -2.2651139e+01   5.0000000e+01   1.3804926e+01  -1.9181909e+01  -8.4525497e+00
   2.3528089e+01  -2.2601767e+01   5.0000000e+01   1.3704239e+01  -2.2841090e+01  -5.1775923e+00
   2.3397254e+01  -2.2558253e+01   5.0000000e+01   1.2413005e+01  -2.6425646e+01  -7.8910320e-01
   2.3264310e+01  -2.2520700e+01   5.0000000e+01   1.0051095e+01  -2.9674308e+01   5.4185893e+00
   2.3129570e+01  -2.2489197e+01   5.0000000e+01   7.2038626e+00  -3.0500875e+01   1.3005574e+01
   2.2993353e+01  -2.2463818e+01   5.0000000e+01   4.6587533e+00  -2.7921746e+01   1.9149434e+01
   2.2855977e+01  -2.2444622e+01   5.0000000e+01   2.8686250e+00  -2.3686065e+01   2.1952868e+01
   2.2717767e+01  -2.2431654e+01   5.0000000e+01   1.8189625e+00  -1.9696983e+01   2.1939820e+01
   2.2579046e+01  -2.2424946e+01   5.0000000e+01   1.3678014e+00  -1.6533585e+01   2.0275790e+01
   2.2440140e+01  -2.2424512e+01   5.0000000e+01   1.3633897e+00  -1.4116702e+01   1.7307289e+01
   2.2301374e+01  -2.2430354e+01   5.0000000e+01   1.6249441e+00  -1.3204509e+01   1.2685114e+01
   2.2163073e+01  -2.2442458e+01   5.0000000e+01   1.9832228e+00  -1.5587147e+01   7.2263316e+00
   2.2025563e+01  -2.2460796e+01   5.0000000e+01   2.3035576e+00  -2.2008712e+01   3.5460395e+00
   2.1889167e+01  -2.2485325e+01   5.0000000e+01   2.4358397e+00  -3.1131135e+01   3.9687824e+00
   2.1754204e+01  -2.2515986e+01   5.0000000e+01   2.2247749e+00  -4.1139659e+01   9.2490108e+00
   2.1620993e+01  -2.2552708e+01   5.0000000e+01   1.8558171e+00  -5.0526143e+01   1.9797686e+01
   2.1489849e+01  -2.2595404e+01   5.0000000e+01   2.3061583e+00  -5.6818761e+01   3.5567908e+01
   2.1361081e+01  -2.2643974e+01   5.0000000e+01   5.0407493e+00  -5.7229182e+01   5.3976222e+01
   2.1234995e+01  -2.2698303e+01   5.0000000e+01   1.0913097e+01  -5.1288277e+01   7.0166858e+01
   2.1111892e+01  -2.2758262e+01   5.0000000e+01   1.9341692e+01  -4.1660434e+01   7.9930099e+01
   2.0992065e+01  -2.2823711e+01   5.0000000e+01   2.8586886e+01  -3.2354653e+01   8.2194225e+01
   2.0875802e+01  -2.2894493e+01   5.0000000e+01   3.6962488e+01  -2.6147054e+01   7.9076269e+01
   2.0763384e+01  -2.2970442e+01   5.0000000e+01   4.3839586e+01  -2.3406595e+01   7.3621147e+01
   2.0655083e+01  -2.3051378e+01   5.0000000e+01   4.9385644e+01  -2.2984950e+01   6.7705781e+01
   2.0551163e+01  -2.3137108e+01   5.0000000e+01   5.3798060e+01  -2.3499638e+01   6.1910140e+01
   2.0451879e+01  -2.3227427e+01   5.0000000e+01   5.7193795e+01  -2.3865242e+01   5.6231504e+01
   2.0357477e+01  -2.3322122e+01   5.0000000e+01   5.9889461e+01  -2.3490639e+01   5.0397825e+01
   2.0268192e+01  -2.3420965e+01   5.0000000e+01   6.2451630e+01  -2.2425292e+01   4.3782726e+01
   2.0184248e+01  -2.3523721e+01   5.0000000e+01   6.5171792e+01  -2.1345885e+01   3.5380865e+01
   2.0105859e+01  -2.3630143e+01   5.0000000e+01   6.7377520e+01  -2.1306724e+01   2.4330887e+01
   2.0033225e+01  -2.3739975e+01   5.0000000e+01   6.7297214e+01  -2.3308878e+01   1.0870563e+01
   1.9966537e+01  -2.3852954e+01   5.0000000e+01   6.2989378e+01  -2.7635943e+01  -2.8097344e+00
   1.9905970e+01  -2.3968805e+01   5.0000000e+01   5.4134017e+01  -3.3375719e+01  -1.3134662e+01
   1.9851686e+01  -2.4087250e+01   5.0000000e+01   4.3008397e+01  -3.8799266e+01  -1.7345075e+01
   1.9803834e+01  -2.4208001e+01   5.0000000e+01   3.3306145e+01  -4.2353105e+01  -1.5572321e+01
   1.9762549e+01  -2.4330765e+01   5.0000000e+01   2.7716470e+01  -4.3471707e+01  -1.0653599e+01
   1.9727950e+01  -2.4455242e+01   5.0000000e+01   2.6746571e+01  -4.2460095e+01  -6.0936032e+00
   1.9700141e+01  -2.4581127e+01   5.0000000e+01   2.9258486e+01  -3.9946957e+01  -4.5430768e+00
   1.9679211e+01  -2.4708114e+01   5.0000000e+01   3.3238657e+01  -3.6605374e+01  -7.5188341e+00
   1.9665231e+01  -2.4835888e+01   5.0000000e+01   3.6037798e+01  -3.3058900e+01  -1.5193099e+01
   1.9561507e+01  -2.5500819e+01   5.0000000e+01   7.0466329e+00  -2.1533863e+01  -3.8262530e+01
   1.9589726e+01  -2.5626946e+01   5.0000000e+01   1.7038430e+00  -1.6968696e+01  -3.6279370e+01
   1.9624627e+01  -2.5751714e+01   5.0000000e+01  -2.9738606e+00  -1.3029178e+01  -3.2625450e+01
   1.9666153e+01  -2.5874835e+01   5.0000000e+01  -6.6807837e+00  -1.0847807e+01  -2.7219884e+01
   1.9714228e+01  -2.5996026e+01   5.0000000e+01  -8.7853488e+00  -1.1085139e+01  -2.0668534e+01
   1.9768761e+01  -2.6115005e+01   5.0000000e+01  -8.8999891e+00  -1.3726474e+01  -1.4349772e+01
   1.9829646e+01  -2.6231497e+01   5.0000000e+01  -7.2400577e+00  -1.8050671e+01  -9.6140999e+00
   1.9896760e+01  -2.6345231e+01   5.0000000e+01  -4.1216959e+00  -2.3151684e+01  -7.2335239e+00
   1.9969966e+01  -2.6455941e+01   5.0000000e+01  -7.0665880e-02  -2.8392165e+01  -8.0786901e+00
   2.0049110e+01  -2.6563367e+01   5.0000000e+01   3.2064087e+00  -3.3097180e+01  -1.2895524e+01
   2.0134023e+01  -2.6667257e+01   5.0000000e+01   3.3254569e+00  -3.6363798e+01  -2.0899658e+01
   2.0224521e+01  -2.6767366e+01   5.0000000e+01  -8.5535106e-01  -3.7249623e+01  -2.9649066e+01
   2.0320404e+01  -2.6863457e+01   5.0000000e+01  -8.2886376e+00  -3.5099501e+01  -3.6229143e+01
   2.0421461e+01  -2.6955302e+01   5.0000000e+01  -1.6423932e+01  -3.0284727e+01  -3.8543535e+01
   2.0527463e+01  -2.7042683e+01   5.0000000e+01  -2.2572196e+01  -2.4370915e+01  -3.6372576e+01
   2.0638171e+01  -2.7125392e+01   5.0000000e+01  -2.5074281e+01  -1.9080392e+01  -3.1447284e+01
   2.0753330e+01  -2.7203230e+01   5.0000000e+01  -2.3801076e+01  -1.5286283e+01  -2.6334398e+01
   2.0872674e+01  -2.7276011e+01   5.0000000e+01  -1.9896219e+01  -1.2801399e+01  -2.3115072e+01
   2.0995925e+01  -2.7343561e+01   5.0000000e+01  -1.5059885e+01  -1.0641301e+01  -2.2552325e+01
   2.1122795e+01  -2.7405716e+01   5.0000000e+01  -1.0702025e+01  -7.6657725e+00  -2.3946322e+01
   2.1252984e+01  -2.7462327e+01   5.0000000e+01  -7.5229206e+00  -3.2542585e+00  -2.5777705e+01
   2.1386183e+01  -2.7513257e+01   5.0000000e+01  -5.7291862e+00   2.4968131e+00  -2.6455766e+01
   2.1522075e+01  -2.7558383e+01   5.0000000e+01  -5.2587649e+00   8.7385110e+00  -2.4671255e+01
   2.1660335e+01  -2.7597595e+01   5.0000000e+01  -5.6608173e+00   1.3861102e+01  -2.0135089e+01
   2.1800629e+01  -2.7630798e+01   5.0000000e+01  -6.2660293e+00   1.6700775e+01  -1.4362988e+01
   2.1942620e+01  -2.7657911e+01   5.0000000e+01  -6.7245698e+00   1.7899880e+01  -9.1982964e+00
   2.2085964e+01  -2.7678868e+01   5.0000000e+01  -7.0446741e+00   1.8650637e+01  -4.9483566e+00
   2.2230314e+01  -2.7693619e+01   5.0000000e+01  -7.3208698e+00   1.9314290e+01  -1.3801453e+00
   2.2375319e+01  -2.7702127e+01   5.0000000e+01  -7.5532388e+00   2.0228093e+01   1.2765158e+00
   2.2520628e+01  -2.7704372e+01   5.0000000e+01  -7.4979781e+00   2.2463064e+01   3.2095882e+00
   2.2665886e+01  -2.7700348e+01   5.0000000e+01  -7.0257717e+00   2.6668628e+01   6.6379762e+00
   2.2810741e+01  -2.7690065e+01   5.0000000e+01  -7.0966197e+00   2.9963683e+01   1.4219122e+01
   2.2954841e+01  -2.7673548e+01   5.0000000e+01  -9.6939020e+00   2.7530098e+01   2.3363799e+01
   2.3097836e+01  -2.7650838e+01   5.0000000e+01  -1.5747418e+01   1.9742395e+01   2.7070917e+01
   2.3239380e+01  -2.7621989e+01   5.0000000e+01  -2.3636629e+01   1.2618872e+01   2.2183887e+01
   2.3379131e+01  -2.7587071e+01   5.0000000e+01  -3.0348667e+01   1.1524294e+01   1.2706363e+01
   2.3516752e+01  -2.7546171e+01   5.0000000e+01  -3.4850508e+01   1.6367290e+01   5.9283886e+00
   2.3651913e+01  -2.7499386e+01   5.0000000e+01  -3.8567546e+01   2.1800755e+01   4.6157015e+00
   2.3784289e+01  -2.7446830e+01   5.0000000e+01  -4.1907417e+01   2.3910808e+01   5.0127357e+00
   2.3913567e+01  -2.7388631e+01   5.0000000e+01  -4.3873774e+01   2.3460862e+01   3.2939681e+00
   2.4039440e+01  -2.7324929e+01   5.0000000e+01  -4.3912312e+01   2.2854524e+01  -1.0204601e+00
   2.4161611e+01  -2.7255877e+01   5.0000000e+01  -4.2390283e+01   2.3411770e+01  -6.3366763e+00
   2.4279795e+01  -2.7181642e+01   5.0000000e+01  -4.0031461e+01   2.4933471e+01  -1.1348145e+01
   2.4393717e+01  -2.7102402e+01   5.0000000e+01  -3.6902859e+01   2.7353605e+01  -1.5910957e+01
   2.4503114e+01  -2.7018346e+01   5.0000000e+01  -3.2532388e+01   3.1702868e+01  -1.8926050e+01
   2.4607736e+01  -2.6929676e+01   5.0000000e+01  -2.7549168e+01   3.7670200e+01  -1.7618179e+01
   2.4707347e+01  -2.6836603e+01   5.0000000e+01  -2.3830278e+01   4.2361122e+01  -1.1189337e+01
   2.4801723e+01  -2.6739348e+01   5.0000000e+01  -2.2760793e+01   4.3305111e+01  -2.7951570e+00
   2.4890655e+01  -2.6638142e+01   5.0000000e+01  -2.3563559e+01   4.0881256e+01   3.1092144e+00
   2.4973949e+01  -2.6533223e+01   5.0000000e+01  -2.3629362e+01   3.7269246e+01   5.0685228e+00
   2.5051423e+01  -2.6424839e+01   5.0000000e+01  -2.1342720e+01   3.3815243e+01   5.2016911e+00
   2.5122915e+01  -2.6313244e+01   5.0000000e+01  -1.7107840e+01   3.0226916e+01   5.9282408e+00
   2.5188275e+01  -2.6198700e+01   5.0000000e+01  -1.2130537e+01   2.5756236e+01   8.1924524e+00
   2.5247369e+01  -2.6081474e+01   5.0000000e+01  -7.6291074e+00   2.0407009e+01   1.1956422e+01
   2.5300079e+01  -2.5961839e+01   5.0000000e+01  -4.7003675e+00   1.5048867e+01   1.6670595e+01
   2.5346303e+01  -2.5840072e+01   5.0000000e+01  -3.5882876e+00   1.0718046e+01   2.1542276e+01
   2.5385955e+01  -2.5716454e+01   5.0000000e+01  -4.1021068e+00   7.7729034e+00   2.6644900e+01
   2.5418965e+01  -2.5591271e+01   5.0000000e+01  -7.4366544e+00   6.0060538e+00   3.1827837e+01
   2.5445279e+01  -2.5464810e+01   5.0000000e+01  -1.4623232e+01   5.7660810e+00   3.4399343e+01
   2.5464856e+01  -2.5337360e+01   5.0000000e+01  -2.3024991e+01   8.0229250e+00   3.1133857e+01
   2.5477675e+01  -2.5209213e+01   5.0000000e+01  -2.7760205e+01   1.3034596e+01   2.2822603e+01
   2.5483728e+01  -2.5080658e+01   5.0000000e+01  -2.6856954e+01   1.9500225e+01   1.3728159e+01
   2.5483022e+01  -2.4951989e+01   5.0000000e+01  -2.2068539e+01   2.5603234e+01   6.9837242e+00
   2.5475580e+01  -2.4823495e+01   5.0000000e+01  -1.5874273e+01   3.0364944e+01   3.2743132e+00
   2.5461440e+01  -2.4695467e+01   5.0000000e+01  -1.0125687e+01   3.3495235e+01   2.3752773e+00
   2.5440654e+01  -2.4568191e+01   5.0000000e+01  -6.4560253e+00   3.4757959e+01   3.7168574e+00
   2.5413289e+01  -2.4441952e+01   5.0000000e+01  -5.9703225e+00   3.4054911e+01   5.8650116e+00
   2.5379424e+01  -2.4317033e+01   5.0000000e+01  -8.4037218e+00   3.1812608e+01   6.9819519e+00
   2.5339155e+01  -2.4193711e+01   5.0000000e+01  -1.2627672e+01   2.8655371e+01   5.7697620e+00
   2.5292589e+01  -2.4072260e+01   5.0000000e+01  -1.7330519e+01   2.4815034e+01   1.3787527e+00
   2.5239846e+01  -2.3952950e+01   5.0000000e+01  -2.0509808e+01   2.0317435e+01  -6.5275740e+00
   2.5181059e+01  -2.3836043e+01   5.0000000e+01  -1.9598724e+01   1.5250236e+01  -1.6660040e+01
   2.5116373e+01  -2.3721796e+01   5.0000000e+01  -1.3537372e+01   9.6335978e+00  -2.5384979e+01
   2.5045945e+01  -2.3610462e+01   5.0000000e+01  -4.9141314e+00   4.0226955e+00  -2.9076236e+01
   2.4969943e+01  -2.3502284e+01   5.0000000e+01   2.1563519e+00  -4.4835509e-01  -2.8020413e+01
   2.4888547e+01  -2.3397498e+01   5.0000000e+01   6.2946094e+00  -3.4220651e+00  -2.5364230e+01
   2.4801945e+01  -2.3296334e+01   5.0000000e+01   8.7822067e+00  -5.5818544e+00  -2.2859951e+01
   2.4710338e+01  -2.3199011e+01   5.0000000e+01   1.0653538e+01  -7.5223419e+00  -2.0105375e+01
   2.4613934e+01  -2.3105742e+01   5.0000000e+01   1.1699097e+01  -9.3437986e+00  -1.6540528e+01
   2.4512952e+01  -2.3016728e+01   5.0000000e+01   1.1403400e+01  -1.0751645e+01  -1.2548082e+01
   2.4407618e+01  -2.2932162e+01   5.0000000e+01   1.0025813e+01  -1.1447833e+01  -9.2951885e+00
   2.4298167e+01  -2.2852228e+01   5.0000000e+01   8.5347234e+00  -1.1649946e+01  -7.4852031e+00
   2.4184843e+01  -2.2777097e+01   5.0000000e+01   7.6516691e+00  -1.1776594e+01  -6.9898924e+00
   2.4067894e+01  -2.2706932e+01   5.0000000e+01   7.7179177e+00  -1.2370398e+01  -7.3778868e+00
   2.3947577e+01  -2.2641884e+01   5.0000000e+01   8.5953080e+00  -1.4030552e+01  -7.7789324e+00
   2.3824154e+01  -2.2582093e+01   5.0000000e+01   9.6233516e+00  -1.6827598e+01  -7.1041410e+00
   2.3697894e+01  -2.2527687e+01   5.0000000e+01   1.0129941e+01  -1.9981338e+01  -4.7011723e+00
   2.3569070e+01  -2.2478782e+01   5.0000000e+01   9.5206104e+00  -2.2539893e+01  -1.0216733e+00
   2.3437960e+01  -2.2435485e+01   5.0000000e+01   7.3936323e+00  -2.4757152e+01   2.8184179e+00
   2.3304846e+01  -2.2397887e+01   5.0000000e+01   4.0831464e+00  -2.7370990e+01   7.0418722e+00
   2.3170014e+01  -2.2366070e+01   5.0000000e+01   6.1174319e-01  -2.9085173e+01   1.2496627e+01
   2.3033751e+01  -2.2340100e+01   5.0000000e+01  -1.9101187e+00  -2.8031076e+01   1.7846253e+01
   2.2896351e+01  -2.2320035e+01   5.0000000e+01  -3.0049564e+00  -2.4700214e+01   2.0943258e+01
   2.2758106e+01  -2.2305916e+01   5.0000000e+01  -2.9810707e+00  -2.0915627e+01   2.1341237e+01
   2.2619311e+01  -2.2297773e+01   5.0000000e+01  -2.2831017e+00  -1.7765841e+01   1.9931400e+01
   2.2480261e+01  -2.2295625e+01   5.0000000e+01  -1.1966187e+00  -1.5288489e+01   1.7305772e+01
   2.2341254e+01  -2.2299476e+01   5.0000000e+01   7.7462322e-02  -1.3878921e+01   1.3139641e+01
   2.2202585e+01  -2.2309317e+01   5.0000000e+01   1.3405531e+00  -1.5143837e+01   7.7698648e+00
   2.2064549e+01  -2.2325128e+01   5.0000000e+01   2.2458634e+00  -2.0227628e+01   3.4229500e+00
   2.1927442e+01  -2.2346874e+01   5.0000000e+01   2.3658249e+00  -2.8195678e+01   2.5891013e+00
   2.1791557e+01  -2.2374510e+01   5.0000000e+01   1.4881536e+00  -3.7185002e+01   6.1070212e+00
   2.1657183e+01  -2.2407975e+01   5.0000000e+01  -3.0486028e-01  -4.6001804e+01   1.4001083e+01
   2.1524609e+01  -2.2447199e+01   5.0000000e+01  -2.4541833e+00  -5.3238698e+01   2.6738553e+01
   2.1394119e+01  -2.2492098e+01   5.0000000e+01  -3.6767670e+00  -5.6363460e+01   4.3724335e+01
   2.1265995e+01  -2.2542575e+01   5.0000000e+01  -2.4823867e+00  -5.3528333e+01   6.1824363e+01
   2.1140513e+01  -2.2598522e+01   5.0000000e+01   1.8704986e+00  -4.5508292e+01   7.6738980e+01
   2.1017944e+01  -2.2659819e+01   5.0000000e+01   8.8415448e+00  -3.5372299e+01   8.5506449e+01
   2.0898557e+01  -2.2726334e+01   5.0000000e+01   1.6909140e+01  -2.6554914e+01   8.7928001e+01
   2.0782611e+01  -2.2797925e+01   5.0000000e+01   2.4594708e+01  -2.0974493e+01   8.6094775e+01
   2.0670361e+01  -2.2874436e+01   5.0000000e+01   3.1320533e+01  -1.8514093e+01   8.2524792e+01
   2.0562055e+01  -2.2955703e+01   5.0000000e+01   3.7270581e+01  -1.7941504e+01   7.8613868e+01
   2.0457932e+01  -2.3041550e+01   5.0000000e+01   4.2703579e+01  -1.8005039e+01   7.4539069e+01
   2.0358227e+01  -2.3131792e+01   5.0000000e+01   4.7632405e+01  -1.7874860e+01   6.9932918e+01
   2.0263163e+01  -2.3226233e+01   5.0000000e+01   5.1931406e+01  -1.7250660e+01   6.4386626e+01
   2.0172956e+01  -2.3324668e+01   5.0000000e+01   5.5614890e+01  -1.6368447e+01   5.7677753e+01
   2.0087812e+01  -2.3426883e+01   5.0000000e+01   5.8878002e+01  -1.5823681e+01   4.9574278e+01
   2.0007928e+01  -2.3532655e+01   5.0000000e+01   6.1569865e+01  -1.6400830e+01   3.9709912e+01
   1.9933490e+01  -2.3641754e+01   5.0000000e+01   6.2735643e+01  -1.8839471e+01   2.8100343e+01
   1.9864676e+01  -2.3753940e+01   5.0000000e+01   6.0900115e+01  -2.3360577e+01   1.5867789e+01
   1.9801649e+01  -2.3868967e+01   5.0000000e+01   5.5145524e+01  -2.9256600e+01   5.3098075e+00
   1.9744563e+01  -2.3986583e+01   5.0000000e+01   4.6283647e+01  -3.5080680e+01  -1.0579100e+00
   1.9693560e+01  -2.4106528e+01   5.0000000e+01   3.6980118e+01  -3.9361433e+01  -2.1932475e+00
   1.9648769e+01  -2.4228537e+01   5.0000000e+01   3.0183974e+01  -4.1395011e+01   5.8023761e-01
   1.9610308e+01  -2.4352341e+01   5.0000000e+01   2.7494597e+01  -4.1370949e+01   4.5258510e+00
   1.9578279e+01  -2.4477663e+01   5.0000000e+01   2.8772934e+01  -3.9895118e+01   6.8726817e+00
   1.9552774e+01  -2.4604225e+01   5.0000000e+01   3.2605742e+01  -3.7650977e+01   5.6438730e+00
   1.9533868e+01  -2.4731743e+01   5.0000000e+01   3.6830898e+01  -3.5309606e+01  -1.1180841e-01
   1.9521625e+01  -2.4859933e+01   5.0000000e+01   3.8850988e+01  -3.3381068e+01  -9.9315883e+00
   1.9516092e+01  -2.4988506e+01   5.0000000e+01   3.6598050e+01  -3.1945147e+01  -2.1484396e+01
   1.9517303e+01  -2.5117173e+01   5.0000000e+01   3.0000751e+01  -3.0572861e+01  -3.1312558e+01
   1.9525276e+01  -2.5245641e+01   5.0000000e+01   2.1358646e+01  -2.8608850e+01  -3.7001100e+01
   1.9540015e+01  -2.5373620e+01   5.0000000e+01   1.3406035e+01  -2.5602783e+01  -3.8768810e+01
   1.9582278e+01  -2.6044625e+01   5.0000000e+01  -1.1174407e+01  -1.3019293e+01  -2.2782093e+01
   1.9636798e+01  -2.6163869e+01   5.0000000e+01  -1.2369454e+01  -1.4701786e+01  -1.5840821e+01
   1.9697417e+01  -2.6280740e+01   5.0000000e+01  -1.1247527e+01  -1.8453439e+01  -9.9246169e+00
   1.9764025e+01  -2.6394989e+01   5.0000000e+01  -8.1417919e+00  -2.3447441e+01  -6.3990005e+00
   1.9836497e+01  -2.6506371e+01   5.0000000e+01  -3.8877043e+00  -2.8753662e+01  -6.4656989e+00
   1.9914695e+01  -2.6614647e+01   5.0000000e+01  -3.6194754e-01  -3.3364530e+01  -1.0662663e+01
   1.9998467e+01  -2.6719585e+01   5.0000000e+01   2.0229614e-01  -3.6263013e+01  -1.7670253e+01
   2.0087649e+01  -2.6820956e+01   5.0000000e+01  -2.9795927e+00  -3.6944976e+01  -2.4751108e+01
   2.0182062e+01  -2.6918543e+01   5.0000000e+01  -8.7486426e+00  -3.5352120e+01  -2.9715197e+01
   2.0281515e+01  -2.7012132e+01   5.0000000e+01  -1.5124834e+01  -3.1670107e+01  -3.1558664e+01
   2.0385805e+01  -2.7101520e+01   5.0000000e+01  -2.0149380e+01  -2.6796754e+01  -3.0191724e+01
   2.0494715e+01  -2.7186511e+01   5.0000000e+01  -2.2361571e+01  -2.2166411e+01  -2.6701942e+01
   2.0608019e+01  -2.7266919e+01   5.0000000e+01  -2.1395197e+01  -1.8759358e+01  -2.3045406e+01
   2.0725477e+01  -2.7342569e+01   5.0000000e+01  -1.8017009e+01  -1.6644745e+01  -2.0966893e+01
   2.0846840e+01  -2.7413292e+01   5.0000000e+01  -1.3561162e+01  -1.5117409e+01  -2.1306309e+01
   2.0971849e+01  -2.7478933e+01   5.0000000e+01  -9.3135022e+00  -1.3111050e+01  -2.3758540e+01
   2.1100234e+01  -2.7539347e+01   5.0000000e+01  -6.0402797e+00  -9.7795485e+00  -2.7168817e+01
   2.1231716e+01  -2.7594400e+01   5.0000000e+01  -3.9414725e+00  -4.7726773e+00  -3.0106439e+01
   2.1366011e+01  -2.7643970e+01   5.0000000e+01  -2.8962211e+00   1.7496178e+00  -3.1152769e+01
   2.1502822e+01  -2.7687946e+01   5.0000000e+01  -2.5799825e+00   8.7999479e+00  -2.9087491e+01
   2.1641851e+01  -2.7726231e+01   5.0000000e+01  -2.4472179e+00   1.4481530e+01  -2.3952627e+01
   2.1782789e+01  -2.7758739e+01   5.0000000e+01  -2.1300803e+00   1.7546538e+01  -1.7682323e+01
   2.1925324e+01  -2.7785398e+01   5.0000000e+01  -1.6717495e+00   1.8710355e+01  -1.2230086e+01
   2.2069141e+01  -2.7806148e+01   5.0000000e+01  -1.1276545e+00   1.9265843e+01  -7.8875201e+00
   2.2213918e+01  -2.7820943e+01   5.0000000e+01  -4.8342485e-01   1.9708522e+01  -4.3356828e+00
   2.2359334e+01  -2.7829750e+01   5.0000000e+01   1.4323581e-01   2.0269539e+01  -1.7105816e+00
   2.2505064e+01  -2.7832548e+01   5.0000000e+01   6.6759833e-01   2.1736295e+01  -2.2090557e-01
   2.2650783e+01  -2.7829332e+01   5.0000000e+01   1.2166713e+00   2.5177314e+01   1.3831552e+00
   2.2796165e+01  -2.7820109e+01   5.0000000e+01   1.5280069e+00   2.9389427e+01   5.9679176e+00
   2.2940886e+01  -2.7804899e+01   5.0000000e+01   9.7518856e-02   3.0221998e+01   1.3664535e+01
   2.3084624e+01  -2.7783737e+01   5.0000000e+01  -4.9295435e+00   2.6082592e+01   1.9780556e+01
   2.3227059e+01  -2.7756669e+01   5.0000000e+01  -1.3681790e+01   2.0278797e+01   2.0434343e+01
   2.3367874e+01  -2.7723757e+01   5.0000000e+01  -2.3202232e+01   1.7036539e+01   1.5819015e+01
   2.3506758e+01  -2.7685074e+01   5.0000000e+01  -2.9756519e+01   1.9090463e+01   1.0506022e+01
   2.3643404e+01  -2.7640706e+01   5.0000000e+01  -3.3528549e+01   2.3824494e+01   1.0166987e+01
   2.3777513e+01  -2.7590751e+01   5.0000000e+01  -3.6874705e+01   2.5764464e+01   1.3366281e+01
   2.3908790e+01  -2.7535322e+01   5.0000000e+01  -4.0132525e+01   2.4386465e+01   1.4611678e+01
   2.4036949e+01  -2.7474540e+01   5.0000000e+01  -4.2479368e+01   2.2767697e+01   1.1896300e+01
   2.4161713e+01  -2.7408541e+01   5.0000000e+01  -4.3533777e+01   2.3118939e+01   6.8065539e+00
   2.4282813e+01  -2.7337470e+01   5.0000000e+01  -4.3572440e+01   2.5347996e+01   1.6568390e+00
   2.4399990e+01  -2.7261485e+01   5.0000000e+01  -4.2864487e+01   2.8297121e+01  -2.9478357e+00
   2.4512996e+01  -2.7180752e+01   5.0000000e+01  -4.0732967e+01   3.2198234e+01  -7.2284080e+00
   2.4621593e+01  -2.7095449e+01   5.0000000e+01  -3.6450585e+01   3.7877837e+01  -9.0158551e+00
   2.4725553e+01  -2.7005763e+01   5.0000000e+01  -3.1215263e+01   4.3445900e+01  -5.4573358e+00
   2.4824663e+01  -2.6911889e+01   5.0000000e+01  -2.7186375e+01   4.5633384e+01   2.4257649e+00
   2.4918718e+01  -2.6814033e+01   5.0000000e+01  -2.5534679e+01   4.3581437e+01   1.0674515e+01
   2.5007530e+01  -2.6712406e+01   5.0000000e+01  -2.5844941e+01   3.9095662e+01   1.5700553e+01
   2.5090920e+01  -2.6607230e+01   5.0000000e+01  -2.6123649e+01   3.4521305e+01   1.6679701e+01
   2.5168725e+01  -2.6498730e+01   5.0000000e+01  -2.4751697e+01   3.0614435e+01   1.5658732e+01
   2.5240794e+01  -2.6387141e+01   5.0000000e+01  -2.1741768e+01   2.6584679e+01   1.4722605e+01
   2.5306989e+01  -2.6272702e+01   5.0000000e+01  -1.7811002e+01   2.1693543e+01   1.4481394e+01
   2.5367188e+01  -2.6155658e+01   5.0000000e+01  -1.3509793e+01   1.6096010e+01   1.4914303e+01
   2.5421281e+01  -2.6036259e+01   5.0000000e+01  -9.4755094e+00   1.0524680e+01   1.6258467e+01
   2.5469171e+01  -2.5914758e+01   5.0000000e+01  -6.4546026e+00   5.7062310e+00   1.8591155e+01
   2.5510778e+01  -2.5791412e+01   5.0000000e+01  -4.8234602e+00   2.0198912e+00   2.1855898e+01
   2.5546034e+01  -2.5666483e+01   5.0000000e+01  -5.2978738e+00  -5.2205556e-01   2.5927007e+01
   2.5574885e+01  -2.5540232e+01   5.0000000e+01  -8.9938192e+00  -1.7349743e+00   2.9366938e+01
   2.5597291e+01  -2.5412926e+01   5.0000000e+01  -1.5136674e+01  -9.4123243e-01   2.9416610e+01
   2.5613226e+01  -2.5284830e+01   5.0000000e+01  -2.0197910e+01   2.4148925e+00   2.5162124e+01
   2.5622677e+01  -2.5156210e+01   5.0000000e+01  -2.1431269e+01   7.7919905e+00   1.9061881e+01
   2.5625646e+01  -2.5027335e+01   5.0000000e+01  -1.9132268e+01   1.3787872e+01   1.3837699e+01
   2.5622147e+01  -2.4898470e+01   5.0000000e+01  -1.4854940e+01   1.9376526e+01   1.0631093e+01
   2.5612207e+01  -2.4769883e+01   5.0000000e+01  -1.0216233e+01   2.4150595e+01   9.8118183e+00
   2.5595867e+01  -2.4641837e+01   5.0000000e+01  -6.9974207e+00   2.7697410e+01   1.1236783e+01
   2.5573179e+01  -2.4514596e+01   5.0000000e+01  -6.7820261e+00   2.9401136e+01   1.3619219e+01
   2.5544210e+01  -2.4388419e+01   5.0000000e+01  -9.6275273e+00   2.8933498e+01   1.4913493e+01
   2.5509036e+01  -2.4263564e+01   5.0000000e+01  -1.4255166e+01   2.6782733e+01   1.3966860e+01
   2.5467747e+01  -2.4140284e+01   5.0000000e+01  -1.9694038e+01   2.3818838e+01   1.0332495e+01
   2.5420444e+01  -2.4018831e+01   5.0000000e+01  -2.4835602e+01   2.0347884e+01   3.1044013e+00
   2.5367238e+01  -2.3899449e+01   5.0000000e+01  -2.7124989e+01   1.6284810e+01  -7.6766326e+00
   2.5308254e+01  -2.3782379e+01   5.0000000e+01  -2.4181556e+01   1.1792310e+01  -1.9458403e+01
   2.5243625e+01  -2.3667857e+01   5.0000000e+01  -1.6231490e+01   7.0295535e+00  -2.8275188e+01
   2.5173494e+01  -2.3556112e+01   5.0000000e+01  -6.5737012e+00   2.4160742e+00  -3.1431180e+01
   2.5098015e+01  -2.3447369e+01   5.0000000e+01   1.0502343e+00  -1.1957285e+00  -2.9834662e+01
   2.5017352e+01  -2.3341845e+01   5.0000000e+01   5.5856079e+00  -3.5057340e+00  -2.6521042e+01
   2.4931676e+01  -2.3239751e+01   5.0000000e+01   8.1718521e+00  -5.1890757e+00  -2.3285879e+01
   2.4841169e+01  -2.3141288e+01   5.0000000e+01   9.6970425e+00  -6.9121648e+00  -2.0004795e+01
   2.4746020e+01  -2.3046654e+01   5.0000000e+01   1.0040349e+01  -8.7003651e+00  -1.6505897e+01
   2.4646427e+01  -2.2956035e+01   5.0000000e+01   9.1164197e+00  -1.0341201e+01  -1.3296468e+01
   2.4542595e+01  -2.2869611e+01   5.0000000e+01   7.4382185e+00  -1.1590963e+01  -1.0926512e+01
   2.4434735e+01  -2.2787553e+01   5.0000000e+01   5.8128528e+00  -1.2396247e+01  -9.5727497e+00
   2.4323068e+01  -2.2710022e+01   5.0000000e+01   4.7324507e+00  -1.2940690e+01  -9.0717618e+00
   2.4207817e+01  -2.2637172e+01   5.0000000e+01   4.4014917e+00  -1.3577377e+01  -9.1716798e+00
   2.4089216e+01  -2.2569145e+01   5.0000000e+01   4.8184048e+00  -1.4657484e+01  -9.3482901e+00
   2.3967500e+01  -2.2506075e+01   5.0000000e+01   5.5580967e+00  -1.6376351e+01  -8.9942099e+00
   2.3842912e+01  -2.2448087e+01   5.0000000e+01   6.0224571e+00  -1.8730964e+01  -7.4402266e+00
   2.3715699e+01  -2.2395293e+01   5.0000000e+01   5.5028712e+00  -2.1013807e+01  -4.2144066e+00
   2.3586111e+01  -2.2347797e+01   5.0000000e+01   3.3336216e+00  -2.2325040e+01  -3.3628663e-01
   2.3454405e+01  -2.2305692e+01   5.0000000e+01  -2.5661876e-01  -2.3337248e+01   2.3903028e+00
   2.3320837e+01  -2.2269060e+01   5.0000000e+01  -4.2109905e+00  -2.5417524e+01   4.4182241e+00
   2.3185671e+01  -2.2237973e+01   5.0000000e+01  -7.5856637e+00  -2.7728368e+01   7.6845216e+00
   2.3049170e+01  -2.2212492e+01   5.0000000e+01  -9.5633807e+00  -2.8153002e+01   1.2134104e+01
   2.2911600e+01  -2.2192666e+01   5.0000000e+01  -9.7152863e+00  -2.6111251e+01   1.5885727e+01
   2.2773229e+01  -2.2178534e+01   5.0000000e+01  -8.4254248e+00  -2.2871513e+01   1.7568236e+01
   2.2634327e+01  -2.2170124e+01   5.0000000e+01  -6.3474864e+00  -1.9844509e+01   1.7383765e+01
   2.2495164e+01  -2.2167452e+01   5.0000000e+01  -3.9091470e+00  -1.7370658e+01   1.5895605e+01
   2.2356011e+01  -2.2170523e+01   5.0000000e+01  -1.3460716e+00  -1.5797147e+01   1.2898971e+01
   2.2217137e+01  -2.2179331e+01   5.0000000e+01   1.0492692e+00  -1.6501604e+01   8.6570168e+00
   2.2078813e+01  -2.2193860e+01   5.0000000e+01   2.7299509e+00  -2.0491167e+01   5.0283788e+00
   2.1941309e+01  -2.2214080e+01   5.0000000e+01   3.0671712e+00  -2.7023741e+01   4.0653331e+00
   2.1804892e+01  -2.2239952e+01   5.0000000e+01   1.8426741e+00  -3.4583247e+01   6.5429609e+00
   2.1669828e+01  -2.2271426e+01   5.0000000e+01  -6.9751048e-01  -4.2165592e+01   1.2512794e+01
   2.1536382e+01  -2.2308441e+01   5.0000000e+01  -4.0983547e+00  -4.8859404e+01   2.2416366e+01
   2.1404814e+01  -2.2350923e+01   5.0000000e+01  -7.4679713e+00  -5.2745087e+01   3.6451162e+01
   2.1275383e+01  -2.2398790e+01   5.0000000e+01  -9.4847567e+00  -5.1721844e+01   5.2917249e+01
   2.1148344e+01  -2.2451949e+01   5.0000000e+01  -9.0415980e+00  -4.5493313e+01   6.8505825e+01
   2.1023948e+01  -2.2510294e+01   5.0000000e+01  -5.8079610e+00  -3.6012104e+01   8.0190053e+01
   2.0902441e+01  -2.2573713e+01   5.0000000e+01  -3.8859358e-01  -2.6250347e+01   8.6637697e+01
   2.0784065e+01  -2.2642079e+01   5.0000000e+01   6.0218454e+00  -1.8653923e+01   8.8486702e+01
   2.0669056e+01  -2.2715259e+01   5.0000000e+01   1.2422390e+01  -1.4143461e+01   8.7604430e+01
   2.0557645e+01  -2.2793110e+01   5.0000000e+01   1.8516499e+01  -1.2163725e+01   8.5734721e+01
   2.0450059e+01  -2.2875477e+01   5.0000000e+01   2.4524264e+01  -1.1537953e+01   8.3640521e+01
   2.0346514e+01  -2.2962198e+01   5.0000000e+01   3.0649627e+01  -1.1201087e+01   8.1151129e+01
   2.0247223e+01  -2.3053101e+01   5.0000000e+01   3.6753252e+01  -1.0526417e+01   7.7642367e+01
   2.0152390e+01  -2.3148008e+01   5.0000000e+01   4.2383842e+01  -9.4798611e+00   7.2557799e+01
   2.0062213e+01  -2.3246729e+01   5.0000000e+01   4.7114380e+01  -8.5123448e+00   6.5841848e+01
   1.9976880e+01  -2.3349068e+01   5.0000000e+01   5.0873360e+01  -8.2418983e+00   5.7777975e+01
   1.9896571e+01  -2.3454823e+01   5.0000000e+01   5.3685429e+01  -9.2720598e+00   4.8583648e+01
   1.9821459e+01  -2.3563781e+01   5.0000000e+01   5.5141783e+01  -1.2023375e+01   3.8499011e+01
   1.9751705e+01  -2.3675726e+01   5.0000000e+01   5.4371187e+01  -1.6504273e+01   2.8215577e+01
   1.9687464e+01  -2.3790433e+01   5.0000000e+01   5.0653508e+01  -2.2130260e+01   1.9048180e+01
   1.9628877e+01  -2.3907671e+01   5.0000000e+01   4.4191213e+01  -2.7806930e+01   1.2638797e+01
   1.9576078e+01  -2.4027205e+01   5.0000000e+01   3.6590437e+01  -3.2362365e+01   1.0107769e+01
   1.9529189e+01  -2.4148793e+01   5.0000000e+01   3.0250477e+01  -3.5135633e+01   1.1095659e+01
   1.9488322e+01  -2.4272190e+01   5.0000000e+01   2.7052300e+01  -3.6135304e+01   1.3857880e+01
   1.9453576e+01  -2.4397145e+01   5.0000000e+01   2.7581227e+01  -3.5761194e+01   1.6055900e+01
   1.9425041e+01  -2.4523405e+01   5.0000000e+01   3.1028552e+01  -3.4575197e+01   1.5589921e+01
   1.9402792e+01  -2.4650711e+01   5.0000000e+01   3.5603575e+01  -3.3227140e+01   1.1205387e+01
   1.9386895e+01  -2.4778802e+01   5.0000000e+01   3.9028916e+01  -3.2365366e+01   2.8106067e+00
   1.9377401e+01  -2.4907418e+01   5.0000000e+01   3.9172985e+01  -3.2289970e+01  -8.2252400e+00
   1.9374351e+01  -2.5036291e+01   5.0000000e+01   3.5083329e+01  -3.2646889e+01  -1.9202549e+01
   1.9377770e+01  -2.5165157e+01   5.0000000e+01   2.7892650e+01  -3.2624154e+01  -2.7344344e+01
   1.9387672e+01  -2.5293749e+01   5.0000000e+01   2.0209814e+01  -3.1494518e+01  -3.1742413e+01
   1.9404057e+01  -2.5421799e+01   5.0000000e+01   1.3872816e+01  -2.8959116e+01  -3.3748894e+01
   1.9426911e+01  -2.5549041e+01   5.0000000e+01   8.5829508e+00  -2.5150252e+01  -3.4933939e+01
   1.9456209e+01  -2.5675208e+01   5.0000000e+01   3.1857683e+00  -2.0657965e+01  -3.5197090e+01
   1.9491908e+01  -2.5800036e+01   5.0000000e+01  -2.5143119e+00  -1.6496582e+01  -3.3445472e+01
   1.9533954e+01  -2.5923262e+01   5.0000000e+01  -7.6716252e+00  -1.3712058e+01  -2.9125594e+01
   1.9714474e+01  -2.6573850e+01   5.0000000e+01  -7.2259136e+00  -3.0255581e+01  -2.9901236e+00
   1.9792084e+01  -2.6681696e+01   5.0000000e+01  -3.8098775e+00  -3.4803415e+01  -6.7976783e+00
   1.9874991e+01  -2.6786394e+01   5.0000000e+01  -3.2365968e+00  -3.7538210e+01  -1.3185845e+01
   1.9963048e+01  -2.6887738e+01   5.0000000e+01  -5.6959131e+00  -3.7851501e+01  -1.9330807e+01
   2.0056096e+01  -2.6985528e+01   5.0000000e+01  -9.8258119e+00  -3.5979073e+01  -2.3388511e+01
   2.0153966e+01  -2.7079572e+01   5.0000000e+01  -1.4192966e+01  -3.2416911e+01  -2.5011815e+01
   2.0256476e+01  -2.7169685e+01   5.0000000e+01  -1.7737925e+01  -2.7958081e+01  -2.4324085e+01
   2.0363436e+01  -2.7255686e+01   5.0000000e+01  -1.9493386e+01  -2.3860357e+01  -2.2014435e+01
   2.0474643e+01  -2.7337406e+01   5.0000000e+01  -1.8973787e+01  -2.1077948e+01  -1.9632747e+01
   2.0589885e+01  -2.7414681e+01   5.0000000e+01  -1.6531451e+01  -1.9656352e+01  -1.8707274e+01
   2.0708943e+01  -2.7487358e+01   5.0000000e+01  -1.3027399e+01  -1.8960840e+01  -2.0007468e+01
   2.0831584e+01  -2.7555290e+01   5.0000000e+01  -9.4324416e+00  -1.7980189e+01  -2.3373751e+01
   2.0957571e+01  -2.7618341e+01   5.0000000e+01  -6.4432710e+00  -1.5802883e+01  -2.7817568e+01
   2.1086657e+01  -2.7676384e+01   5.0000000e+01  -4.2978625e+00  -1.1951766e+01  -3.2061018e+01
   2.1218587e+01  -2.7729303e+01   5.0000000e+01  -2.8529535e+00  -6.3610709e+00  -3.4990538e+01
   2.1353099e+01  -2.7776990e+01   5.0000000e+01  -1.8366028e+00   7.2372418e-01  -3.5623821e+01
   2.1489926e+01  -2.7819350e+01   5.0000000e+01  -9.6684569e-01   8.1868618e+00  -3.3124953e+01
   2.1628795e+01  -2.7856296e+01   5.0000000e+01   1.1437627e-02   1.4084942e+01  -2.7892732e+01
   2.1769425e+01  -2.7887753e+01   5.0000000e+01   1.1088535e+00   1.7319931e+01  -2.1792412e+01
   2.1911535e+01  -2.7913657e+01   5.0000000e+01   2.2150560e+00   1.8541708e+01  -1.6449906e+01
   2.2054838e+01  -2.7933957e+01   5.0000000e+01   3.4422706e+00   1.8893058e+01  -1.2240665e+01
   2.2199043e+01  -2.7948610e+01   5.0000000e+01   4.9343628e+00   1.9071653e+01  -9.0792897e+00
   2.2343859e+01  -2.7957588e+01   5.0000000e+01   6.4683051e+00   1.9536515e+01  -7.0057727e+00
   2.2488992e+01  -2.7960870e+01   5.0000000e+01   7.5562022e+00   2.0915530e+01  -6.1142215e+00
   2.2634147e+01  -2.7958452e+01   5.0000000e+01   7.9268301e+00   2.4105964e+01  -5.6815686e+00
   2.2779029e+01  -2.7950337e+01   5.0000000e+01   7.5625745e+00   2.8840349e+01  -3.4261525e+00
   2.2923346e+01  -2.7936543e+01   5.0000000e+01   5.9200247e+00   3.2286849e+01   2.0690010e+00
   2.3066804e+01  -2.7917097e+01   5.0000000e+01   1.5550867e+00   3.2349386e+01   8.6402476e+00
   2.3209114e+01  -2.7892039e+01   5.0000000e+01  -6.6232990e+00   3.0069276e+01   1.3975733e+01
   2.3349987e+01  -2.7861420e+01   5.0000000e+01  -1.7259275e+01   2.6434861e+01   1.6696175e+01
   2.3489141e+01  -2.7825302e+01   5.0000000e+01  -2.6099161e+01   2.4060233e+01   1.5556551e+01
   2.3626295e+01  -2.7783759e+01   5.0000000e+01  -3.0402720e+01   2.5543733e+01   1.4726551e+01
   2.3761176e+01  -2.7736873e+01   5.0000000e+01  -3.2262301e+01   2.7126306e+01   1.8011480e+01
   2.3893514e+01  -2.7684741e+01   5.0000000e+01  -3.4281677e+01   2.5496868e+01   2.1641646e+01
   2.4023048e+01  -2.7627467e+01   5.0000000e+01  -3.6696355e+01   2.2867204e+01   2.1711510e+01
   2.4149521e+01  -2.7565168e+01   5.0000000e+01  -3.8928377e+01   2.2197171e+01   1.8630385e+01
   2.4272685e+01  -2.7497967e+01   5.0000000e+01  -4.0603245e+01   2.4128642e+01   1.4806972e+01
   2.4392301e+01  -2.7426001e+01   5.0000000e+01  -4.1752866e+01   2.7297633e+01   1.1770851e+01
   2.4508136e+01  -2.7349414e+01   5.0000000e+01  -4.2250464e+01   3.0651478e+01   9.0161868e+00
   2.4619969e+01  -2.7268357e+01   5.0000000e+01  -4.1073893e+01   3.4903640e+01   6.3974155e+00
   2.4727586e+01  -2.7182994e+01   5.0000000e+01  -3.7495820e+01   4.0134286e+01   6.4151182e+00
   2.4830783e+01  -2.7093494e+01   5.0000000e+01  -3.2834450e+01   4.3682750e+01   1.0921701e+01
   2.4929369e+01  -2.7000034e+01   5.0000000e+01  -2.9041359e+01   4.3185567e+01   1.7788942e+01
   2.5023159e+01  -2.6902800e+01   5.0000000e+01  -2.6889679e+01   3.9295988e+01   2.3737327e+01
   2.5111984e+01  -2.6801982e+01   5.0000000e+01  -2.6347290e+01   3.4203355e+01   2.7048029e+01
   2.5195681e+01  -2.6697780e+01   5.0000000e+01  -2.6532312e+01   2.9581772e+01   2.7525129e+01
   2.5274103e+01  -2.6590398e+01   5.0000000e+01  -2.6230709e+01   2.5590978e+01   2.6184512e+01
   2.5347112e+01  -2.6480045e+01   5.0000000e+01  -2.4909266e+01   2.1343631e+01   2.4004452e+01
   2.5414581e+01  -2.6366936e+01   5.0000000e+01  -2.2551337e+01   1.6306080e+01   2.1317079e+01
   2.5476398e+01  -2.6251292e+01   5.0000000e+01  -1.9216037e+01   1.0826183e+01   1.8393462e+01
   2.5532459e+01  -2.6133336e+01   5.0000000e+01  -1.5126482e+01   5.6115900e+00   1.6065017e+01
   2.5582675e+01  -2.6013296e+01   5.0000000e+01  -1.1040625e+01   1.0591149e+00   1.5198084e+01
   2.5626968e+01  -2.5891402e+01   5.0000000e+01  -7.7350666e+00  -2.7256460e+00   1.5929866e+01
   2.5665272e+01  -2.5767889e+01   5.0000000e+01  -5.7356357e+00  -5.6570836e+00   1.8038278e+01
   2.5697533e+01  -2.5642992e+01   5.0000000e+01  -5.8588289e+00  -7.5331169e+00   2.0995848e+01
   2.5723708e+01  -2.5516949e+01   5.0000000e+01  -8.7189977e+00  -7.9427161e+00   2.3170594e+01
   2.5743768e+01  -2.5390000e+01   5.0000000e+01  -1.2916927e+01  -6.3905346e+00   2.2571685e+01
   2.5757695e+01  -2.5262384e+01   5.0000000e+01  -1.5578642e+01  -2.8479790e+00   1.9413992e+01
   2.5765480e+01  -2.5134343e+01   5.0000000e+01  -1.5424506e+01   1.9825173e+00   1.5825753e+01
   2.5767130e+01  -2.5006116e+01   5.0000000e+01  -1.3010050e+01   7.2591896e+00   1.3265124e+01
   2.5762661e+01  -2.4877945e+01   5.0000000e+01  -9.3019873e+00   1.2552678e+01   1.2536775e+01
   2.5752099e+01  -2.4750069e+01   5.0000000e+01  -5.8591733e+00   1.7520505e+01   1.4172147e+01
   2.5735483e+01  -2.4622726e+01   5.0000000e+01  -4.7235203e+00   2.1517271e+01   1.7678367e+01
   2.5712863e+01  -2.4496152e+01   5.0000000e+01  -7.2891564e+00   2.3778723e+01   2.0944152e+01
   2.5684298e+01  -2.4370582e+01   5.0000000e+01  -1.2718634e+01   2.3867961e+01   2.1514361e+01
   2.5649858e+01  -2.4246248e+01   5.0000000e+01  -1.8889044e+01   2.2137829e+01   1.8876341e+01
   2.5609623e+01  -2.4123378e+01   5.0000000e+01  -2.4870739e+01   1.9652604e+01   1.3626679e+01
   2.5563683e+01  -2.4002198e+01   5.0000000e+01  -3.0181550e+01   1.7065222e+01   5.0221452e+00
   2.5512139e+01  -2.3882929e+01   5.0000000e+01  -3.2293279e+01   1.4077186e+01  -7.2192063e+00
   2.5455099e+01  -2.3765790e+01   5.0000000e+01  -2.8713976e+01   1.0556092e+01  -2.0142294e+01
   2.5392680e+01  -2.3650995e+01   5.0000000e+01  -2.0060244e+01   6.7887749e+00  -2.9679632e+01
   2.5325011e+01  -2.3538751e+01   5.0000000e+01  -9.6001251e+00   3.0596882e+00  -3.3518064e+01
   2.5252227e+01  -2.3429262e+01   5.0000000e+01  -9.3427808e-01  -1.5557611e-01  -3.2300041e+01
   2.5174470e+01  -2.3322726e+01   5.0000000e+01   4.4332357e+00  -2.4734373e+00  -2.8652145e+01
   2.5091893e+01  -2.3219335e+01   5.0000000e+01   7.1162528e+00  -4.0988854e+00  -2.4806833e+01
   2.5004655e+01  -2.3119276e+01   5.0000000e+01   8.2147723e+00  -5.6796091e+00  -2.1469971e+01
   2.4912921e+01  -2.3022729e+01   5.0000000e+01   8.2252876e+00  -7.4432136e+00  -1.8473273e+01
   2.4816865e+01  -2.2929866e+01   5.0000000e+01   7.3314518e+00  -9.0972843e+00  -1.5977011e+01
   2.4716668e+01  -2.2840855e+01   5.0000000e+01   5.9442164e+00  -1.0458748e+01  -1.4281613e+01
   2.4612515e+01  -2.2755854e+01   5.0000000e+01   4.5460587e+00  -1.1564872e+01  -1.3357889e+01
   2.4504600e+01  -2.2675015e+01   5.0000000e+01   3.4912100e+00  -1.2490798e+01  -1.2968777e+01
   2.4393119e+01  -2.2598482e+01   5.0000000e+01   2.9952086e+00  -1.3273046e+01  -1.3007150e+01
   2.4278276e+01  -2.2526391e+01   5.0000000e+01   3.2512154e+00  -1.4098260e+01  -1.3304224e+01
   2.4160281e+01  -2.2458871e+01   5.0000000e+01   4.1120797e+00  -1.5102182e+01  -1.3311264e+01
   2.4039345e+01  -2.2396042e+01   5.0000000e+01   4.9811952e+00  -1.6288363e+01  -1.2637868e+01
   2.3915687e+01  -2.2338014e+01   5.0000000e+01   5.1605022e+00  -1.7764683e+01  -1.0986911e+01
   2.3789528e+01  -2.2284891e+01   5.0000000e+01   3.8496045e+00  -1.9159662e+01  -8.1081284e+00
   2.3661093e+01  -2.2236767e+01   5.0000000e+01   5.6835924e-01  -1.9746759e+01  -5.0600035e+00
   2.3530612e+01  -2.2193726e+01   5.0000000e+01  -3.7814772e+00  -2.0069915e+01  -3.6649974e+00
   2.3398314e+01  -2.2155846e+01   5.0000000e+01  -7.6599547e+00  -2.1590382e+01  -3.6848612e+00
   2.3264435e+01  -2.2123192e+01   5.0000000e+01  -1.0623836e+01  -2.4430391e+01  -3.0063119e+00
   2.3129212e+01  -2.2095823e+01   5.0000000e+01  -1.2671046e+01  -2.7157117e+01  -2.1179343e-01
   2.2992881e+01  -2.2073786e+01   5.0000000e+01  -1.3372771e+01  -2.8077747e+01   4.3396583e+00
   2.2855685e+01  -2.2057121e+01   5.0000000e+01  -1.2514364e+01  -2.6702740e+01   8.8349615e+00
   2.2717864e+01  -2.2045857e+01   5.0000000e+01  -1.0410551e+01  -2.4183911e+01   1.1824143e+01
   2.2579660e+01  -2.2040014e+01   5.0000000e+01  -7.5825961e+00  -2.1672996e+01   1.3272471e+01
   2.2441316e+01  -2.2039602e+01   5.0000000e+01  -4.4302772e+00  -1.9532712e+01   1.3324539e+01
   2.2303075e+01  -2.2044622e+01   5.0000000e+01  -1.2783248e+00  -1.8453802e+01   1.1813480e+01
   2.2165180e+01  -2.2055065e+01   5.0000000e+01   1.3511343e+00  -1.9612814e+01   9.4302014e+00
   2.2027873e+01  -2.2070913e+01   5.0000000e+01   2.7857457e+00  -2.3260236e+01   7.7737690e+00
   2.1891396e+01  -2.2092137e+01   5.0000000e+01   2.5765428e+00  -2.8542727e+01   7.9834133e+00
   2.1755989e+01  -2.2118700e+01   5.0000000e+01   7.2755591e-01  -3.4560498e+01   1.0525707e+01
   2.1621891e+01  -2.2150556e+01   5.0000000e+01  -2.4396673e+00  -4.0662399e+01   1.5806019e+01
   2.1489339e+01  -2.2187648e+01   5.0000000e+01  -6.4403304e+00  -4.5926719e+01   2.4437705e+01
   2.1358566e+01  -2.2229911e+01   5.0000000e+01  -1.0470748e+01  -4.8586042e+01   3.6560445e+01
   2.1229806e+01  -2.2277270e+01   5.0000000e+01  -1.3490609e+01  -4.6868974e+01   5.0680614e+01
   2.1103288e+01  -2.2329641e+01   5.0000000e+01  -1.4700400e+01  -4.0625353e+01   6.4100129e+01
   2.0979236e+01  -2.2386931e+01   5.0000000e+01  -1.3808596e+01  -3.1547872e+01   7.4536975e+01
   2.0857874e+01  -2.2449039e+01   5.0000000e+01  -1.1027981e+01  -2.2071142e+01   8.1043307e+01
   2.0739418e+01  -2.2515856e+01   5.0000000e+01  -6.9702382e+00  -1.4270992e+01   8.3998986e+01
   2.0624084e+01  -2.2587261e+01   5.0000000e+01  -2.2881689e+00  -9.1617253e+00   8.4702201e+01
   2.0512081e+01  -2.2663129e+01   5.0000000e+01   2.7363447e+00  -6.5507251e+00   8.4537719e+01
   2.0403611e+01  -2.2743324e+01   5.0000000e+01   8.2183678e+00  -5.5253582e+00   8.4285344e+01
   2.0298876e+01  -2.2827704e+01   5.0000000e+01   1.4389051e+01  -5.0066191e+00   8.3906107e+01
   2.0198066e+01  -2.2916117e+01   5.0000000e+01   2.1214498e+01  -4.1825720e+00   8.2670018e+01
   2.0101371e+01  -2.3008406e+01   5.0000000e+01   2.8201106e+01  -2.8406641e+00   7.9650966e+01
   2.0008971e+01  -2.3104406e+01   5.0000000e+01   3.4568349e+01  -1.4042926e+00   7.4398569e+01
   1.9921040e+01  -2.3203944e+01   5.0000000e+01   3.9707193e+01  -5.7012496e-01   6.7241742e+01
   1.9837745e+01  -2.3306841e+01   5.0000000e+01   4.3477719e+01  -9.1615788e-01   5.8959467e+01
   1.9759248e+01  -2.3412912e+01   5.0000000e+01   4.5989694e+01  -2.6948836e+00   5.0217986e+01
   1.9685700e+01  -2.3521966e+01   5.0000000e+01   4.7089038e+01  -5.8707182e+00   4.1387663e+01
   1.9617246e+01  -2.3633805e+01   5.0000000e+01   4.6283543e+01  -1.0216841e+01   3.2938318e+01
   1.9554023e+01  -2.3748227e+01   5.0000000e+01   4.3230658e+01  -1.5258983e+01   2.5683432e+01
   1.9496160e+01  -2.3865024e+01   5.0000000e+01   3.8195775e+01  -2.0265871e+01   2.0589625e+01
   1.9443775e+01  -2.3983984e+01   5.0000000e+01   3.2298154e+01  -2.4485579e+01   1.8361455e+01
   1.9396979e+01  -2.4104888e+01   5.0000000e+01   2.7305906e+01  -2.7480077e+01   1.8897067e+01
   1.9355873e+01  -2.4227516e+01   5.0000000e+01   2.4869752e+01  -2.9188454e+01   2.1031673e+01
   1.9320549e+01  -2.4351643e+01   5.0000000e+01   2.5729564e+01  -2.9802644e+01   2.2841170e+01
   1.9291088e+01  -2.4477041e+01   5.0000000e+01   2.9351290e+01  -2.9681085e+01   2.2346774e+01
   1.9267562e+01  -2.4603478e+01   5.0000000e+01   3.4107085e+01  -2.9336769e+01   1.8272888e+01
   1.9250032e+01  -2.4730719e+01   5.0000000e+01   3.7861503e+01  -2.9410219e+01   1.0554556e+01
   1.9238550e+01  -2.4858530e+01   5.0000000e+01   3.8775313e+01  -3.0369486e+01   4.4110485e-01
   1.9233154e+01  -2.4986671e+01   5.0000000e+01   3.6054134e+01  -3.2027628e+01  -9.9193369e+00
   1.9233875e+01  -2.5114905e+01   5.0000000e+01   3.0383710e+01  -3.3534911e+01  -1.8316392e+01
   1.9240730e+01  -2.5242990e+01   5.0000000e+01   2.3753755e+01  -3.4024610e+01  -2.3688874e+01
   1.9253725e+01  -2.5370685e+01   5.0000000e+01   1.8075695e+01  -3.3127950e+01  -2.6886812e+01
   1.9272856e+01  -2.5497751e+01   5.0000000e+01   1.3550111e+01  -3.0894796e+01  -2.9654871e+01
   1.9298106e+01  -2.5623947e+01   5.0000000e+01   8.8231320e+00  -2.7543684e+01  -3.2525041e+01
   1.9329446e+01  -2.5749033e+01   5.0000000e+01   2.8861705e+00  -2.3530336e+01  -3.4227623e+01
   1.9366837e+01  -2.5872771e+01   5.0000000e+01  -3.8240442e+00  -1.9674496e+01  -3.3184237e+01
   1.9410225e+01  -2.5994925e+01   5.0000000e+01  -9.9314776e+00  -1.6912200e+01  -2.8937988e+01
   1.9459548e+01  -2.6115262e+01   5.0000000e+01  -1.4187724e+01  -1.5939516e+01  -2.2321406e+01
   1.9514729e+01  -2.6233549e+01   5.0000000e+01  -1.5954828e+01  -1.7129066e+01  -1.4729964e+01
   1.9575679e+01  -2.6349558e+01   5.0000000e+01  -1.4993556e+01  -2.0398710e+01  -7.8128436e+00
   1.9642298e+01  -2.6463065e+01   5.0000000e+01  -1.1649038e+01  -2.5088397e+01  -3.4134642e+00
   1.9948419e+01  -2.7071110e+01   5.0000000e+01  -1.0390375e+01  -3.6375035e+01  -1.6966761e+01
   2.0046386e+01  -2.7165472e+01   5.0000000e+01  -1.3108162e+01  -3.2714881e+01  -1.9082603e+01
   2.0148837e+01  -2.7256058e+01   5.0000000e+01  -1.5420287e+01  -2.8247389e+01  -1.9344198e+01
   2.0255598e+01  -2.7342702e+01   5.0000000e+01  -1.6725212e+01  -2.4278006e+01  -1.8058379e+01
   2.0366482e+01  -2.7425244e+01   5.0000000e+01  -1.6614193e+01  -2.1918629e+01  -1.6551761e+01
   2.0481296e+01  -2.7503533e+01   5.0000000e+01  -1.5293661e+01  -2.1298858e+01  -1.6401269e+01
   2.0599836e+01  -2.7577424e+01   5.0000000e+01  -1.3285633e+01  -2.1738321e+01  -1.8445370e+01
   2.0721891e+01  -2.7646780e+01   5.0000000e+01  -1.1090721e+01  -2.2102498e+01  -2.2601816e+01
   2.0847241e+01  -2.7711473e+01   5.0000000e+01  -8.9923375e+00  -2.1249894e+01  -2.7923583e+01
   2.0975661e+01  -2.7771382e+01   5.0000000e+01  -7.0162074e+00  -1.8490502e+01  -3.3116078e+01
   2.1106917e+01  -2.7826395e+01   5.0000000e+01  -5.0290495e+00  -1.3732494e+01  -3.7122716e+01
   2.1240769e+01  -2.7876411e+01   5.0000000e+01  -2.9640460e+00  -7.1454030e+00  -3.9414532e+01
   2.1376971e+01  -2.7921334e+01   5.0000000e+01  -1.0157992e+00   7.8365425e-01  -3.9335234e+01
   2.1515271e+01  -2.7961082e+01   5.0000000e+01   6.8260796e-01   8.4806988e+00  -3.6324616e+01
   2.1655413e+01  -2.7995579e+01   5.0000000e+01   2.1941614e+00   1.4038067e+01  -3.1091004e+01
   2.1797138e+01  -2.8024762e+01   5.0000000e+01   3.6264834e+00   1.6843224e+01  -2.5335998e+01
   2.1940180e+01  -2.8048574e+01   5.0000000e+01   5.1827865e+00   1.7664104e+01  -2.0339011e+01
   2.2084271e+01  -2.8066971e+01   5.0000000e+01   7.1569248e+00   1.7527910e+01  -1.6686339e+01
   2.2229144e+01  -2.8079920e+01   5.0000000e+01   9.5778817e+00   1.7434894e+01  -1.4679058e+01
   2.2374524e+01  -2.8087394e+01   5.0000000e+01   1.1864524e+01   1.8323476e+01  -1.4238459e+01
   2.2520141e+01  -2.8089380e+01   5.0000000e+01   1.3032002e+01   2.0907434e+01  -1.4867342e+01
   2.2665719e+01  -2.8085875e+01   5.0000000e+01   1.2453333e+01   2.5581808e+01  -1.5273352e+01
   2.2810986e+01  -2.8076885e+01   5.0000000e+01   1.0376062e+01   3.1438312e+01  -1.3284411e+01
   2.2955670e+01  -2.8062427e+01   5.0000000e+01   6.9901639e+00   3.6285920e+01  -8.0808523e+00
   2.3099498e+01  -2.8042528e+01   5.0000000e+01   1.2467248e+00   3.9253225e+01  -6.2551543e-01
   2.3242202e+01  -2.8017226e+01   5.0000000e+01  -7.4867770e+00   3.9814871e+01   8.8764706e+00
   2.3383515e+01  -2.7986567e+01   5.0000000e+01  -1.7680685e+01   3.5962615e+01   1.7983211e+01
   2.3523174e+01  -2.7950611e+01   5.0000000e+01  -2.6041101e+01   3.0166274e+01   2.1613547e+01
   2.3660920e+01  -2.7909424e+01   5.0000000e+01  -2.9910289e+01   2.7786284e+01   2.1806912e+01
   2.3796496e+01  -2.7863083e+01   5.0000000e+01  -3.0480126e+01   2.7103040e+01   2.4069173e+01
   2.3929654e+01  -2.7811676e+01   5.0000000e+01  -3.0675786e+01   2.4598783e+01   2.6931050e+01
   2.4060150e+01  -2.7755298e+01   5.0000000e+01  -3.1614219e+01   2.1857330e+01   2.7249758e+01
   2.4187744e+01  -2.7694055e+01   5.0000000e+01  -3.3133797e+01   2.1376792e+01   2.5514004e+01
   2.4312205e+01  -2.7628060e+01   5.0000000e+01  -3.4822980e+01   2.3330672e+01   2.3695047e+01
   2.4433310e+01  -2.7557436e+01   5.0000000e+01  -3.6373130e+01   2.6216428e+01   2.2797872e+01
   2.4550840e+01  -2.7482315e+01   5.0000000e+01  -3.7568821e+01   2.8890375e+01   2.2226015e+01
   2.4664587e+01  -2.7402835e+01   5.0000000e+01  -3.7700342e+01   3.1773775e+01   2.1381998e+01
   2.4774350e+01  -2.7319142e+01   5.0000000e+01  -3.5847547e+01   3.5277515e+01   2.1631763e+01
   2.4879937e+01  -2.7231392e+01   5.0000000e+01  -3.2390772e+01   3.7676517e+01   2.4724712e+01
   2.4981165e+01  -2.7139745e+01   5.0000000e+01  -2.8946677e+01   3.6845887e+01   2.9644429e+01
   2.5077861e+01  -2.7044369e+01   5.0000000e+01  -2.6471699e+01   3.3109106e+01   3.3764576e+01
   2.5169861e+01  -2.6945437e+01   5.0000000e+01  -2.4993878e+01   2.8353779e+01   3.6044201e+01
   2.5257010e+01  -2.6843131e+01   5.0000000e+01  -2.4498570e+01   2.3812280e+01   3.6731553e+01
   2.5339165e+01  -2.6737636e+01   5.0000000e+01  -2.4672610e+01   1.9702531e+01   3.5970623e+01
   2.5416191e+01  -2.6629143e+01   5.0000000e+01  -2.4996198e+01   1.5636013e+01   3.3713197e+01
   2.5487966e+01  -2.6517847e+01   5.0000000e+01  -2.4960602e+01   1.1244020e+01   2.9769724e+01
   2.5554375e+01  -2.6403948e+01   5.0000000e+01  -2.3988578e+01   6.6846285e+00   2.4346326e+01
   2.5615318e+01  -2.6287652e+01   5.0000000e+01  -2.1655962e+01   2.4156976e+00   1.8435421e+01
   2.5670702e+01  -2.6169165e+01   5.0000000e+01  -1.8056976e+01  -1.3693761e+00   1.3549554e+01
   2.5720446e+01  -2.6048698e+01   5.0000000e+01  -1.3976425e+01  -4.8464611e+00   1.0682080e+01
   2.5764481e+01  -2.5926466e+01   5.0000000e+01  -1.0206283e+01  -8.0455536e+00   9.7980184e+00
   2.5802745e+01  -2.5802684e+01   5.0000000e+01  -7.2467551e+00  -1.0650350e+01   1.0571916e+01
   2.5835191e+01  -2.5677571e+01   5.0000000e+01  -5.8090381e+00  -1.2258833e+01   1.2665580e+01
   2.5861780e+01  -2.5551347e+01   5.0000000e+01  -6.6489405e+00  -1.2513968e+01   1.4954852e+01
   2.5882485e+01  -2.5424232e+01   5.0000000e+01  -9.1095667e+00  -1.1126233e+01   1.5673407e+01
   2.5897288e+01  -2.5296449e+01   5.0000000e+01  -1.0989767e+01  -8.1885834e+00   1.4394719e+01
   2.5906183e+01  -2.5168220e+01   5.0000000e+01  -1.0857409e+01  -4.2396815e+00   1.2539860e+01
   2.5909172e+01  -2.5039767e+01   5.0000000e+01  -8.8125697e+00   2.2791786e-01   1.1414177e+01
   2.5906269e+01  -2.4911313e+01   5.0000000e+01  -5.4100115e+00   5.0485371e+00   1.2032656e+01
   2.5897498e+01  -2.4783078e+01   5.0000000e+01  -2.2110197e+00   9.9981041e+00   1.5274730e+01
   2.5882891e+01  -2.4655284e+01   5.0000000e+01  -1.5230969e+00   1.4462977e+01   2.0611067e+01
   2.5862492e+01  -2.4528148e+01   5.0000000e+01  -5.0493040e+00   1.7729686e+01   2.5669593e+01
   2.5836353e+01  -2.4401889e+01   5.0000000e+01  -1.2204083e+01   1.9256846e+01   2.7277689e+01
   2.5804534e+01  -2.4276721e+01   5.0000000e+01  -2.0209448e+01   1.8839989e+01   2.4211817e+01
   2.5767107e+01  -2.4152857e+01   5.0000000e+01  -2.6948663e+01   1.7035977e+01   1.7944826e+01
   2.5724151e+01  -2.4030507e+01   5.0000000e+01  -3.2477852e+01   1.5030612e+01   9.4575330e+00
   2.5675754e+01  -2.3909876e+01   5.0000000e+01  -3.5868537e+01   1.3175021e+01  -2.3430839e+00
   2.5622011e+01  -2.3791169e+01   5.0000000e+01  -3.4052742e+01   1.0814690e+01  -1.6250956e+01
   2.5563027e+01  -2.3674584e+01   5.0000000e+01  -2.6270616e+01   7.8550643e+00  -2.7861492e+01
   2.5498915e+01  -2.3560318e+01   5.0000000e+01  -1.5374263e+01   4.7645927e+00  -3.3966346e+01
   2.5429794e+01  -2.3448561e+01   5.0000000e+01  -5.2055591e+00   1.8933917e+00  -3.4459362e+01
   2.5355792e+01  -2.3339499e+01   5.0000000e+01   1.8732396e+00  -5.0603994e-01  -3.1496107e+01
   2.5277042e+01  -2.3233315e+01   5.0000000e+01   5.7192301e+00  -2.2982522e+00  -2.7487149e+01
   2.5193686e+01  -2.3130184e+01   5.0000000e+01   7.2041145e+00  -3.6243297e+00  -2.3939259e+01
   2.5105873e+01  -2.3030278e+01   5.0000000e+01   7.3180173e+00  -4.9630982e+00  -2.1383908e+01
   2.5013755e+01  -2.2933761e+01   5.0000000e+01   6.7570906e+00  -6.5122356e+00  -1.9550846e+01
   2.4917495e+01  -2.2840793e+01   5.0000000e+01   5.8833495e+00  -7.9838835e+00  -1.8159701e+01
   2.4817258e+01  -2.2751528e+01   5.0000000e+01   4.9144366e+00  -9.1512131e+00  -1.7208589e+01
   2.4713215e+01  -2.2666113e+01   5.0000000e+01   3.9997430e+00  -1.0126445e+01  -1.6809368e+01
   2.4605544e+01  -2.2584686e+01   5.0000000e+01   3.3993275e+00  -1.1154210e+01  -1.6935435e+01
   2.4494428e+01  -2.2507383e+01   5.0000000e+01   3.5189867e+00  -1.2244871e+01  -1.7346792e+01
   2.4380052e+01  -2.2434330e+01   5.0000000e+01   4.5973405e+00  -1.3269274e+01  -1.7618508e+01
   2.4262609e+01  -2.2365647e+01   5.0000000e+01   6.2740404e+00  -1.4139319e+01  -1.7240225e+01
   2.4142293e+01  -2.2301445e+01   5.0000000e+01   7.7754118e+00  -1.4738155e+01  -1.6043107e+01
   2.4019305e+01  -2.2241829e+01   5.0000000e+01   8.3050499e+00  -1.5100193e+01  -1.4199113e+01
   2.3893846e+01  -2.2186898e+01   5.0000000e+01   7.0140249e+00  -1.5256194e+01  -1.1895780e+01
   2.3766125e+01  -2.2136739e+01   5.0000000e+01   3.4410936e+00  -1.4996529e+01  -1.0039555e+01
   2.3636349e+01  -2.2091435e+01   5.0000000e+01  -1.3366916e+00  -1.4944925e+01  -1.0034062e+01
   2.3504731e+01  -2.2051060e+01   5.0000000e+01  -5.2899817e+00  -1.6340637e+01  -1.1377384e+01
   2.3371486e+01  -2.2015679e+01   5.0000000e+01  -7.7805305e+00  -1.9161216e+01  -1.2211768e+01
   2.3236830e+01  -2.1985350e+01   5.0000000e+01  -9.4492927e+00  -2.2691391e+01  -1.1482553e+01
   2.3100982e+01  -2.1960121e+01   5.0000000e+01  -1.0639947e+01  -2.6049187e+01  -8.4881887e+00
   2.2964163e+01  -2.1940034e+01   5.0000000e+01  -1.1226025e+01  -2.7828753e+01  -3.4090369e+00
   2.2826593e+01  -2.1925122e+01   5.0000000e+01  -1.0905675e+01  -2.7509818e+01   2.1368529e+00
   2.2688496e+01  -2.1915408e+01   5.0000000e+01  -9.5513504e+00  -2.5963419e+01   6.8009943e+00
   2.2550094e+01  -2.1910909e+01   5.0000000e+01  -7.3942918e+00  -2.4044178e+01   1.0261014e+01
   2.2411611e+01  -2.1911631e+01   5.0000000e+01  -4.7995828e+00  -2.2177657e+01   1.2328908e+01
   2.2273271e+01  -2.1917574e+01   5.0000000e+01  -2.1826363e+00  -2.1113598e+01   1.2803174e+01
   2.2135297e+01  -2.1928727e+01   5.0000000e+01  -1.0627101e-01  -2.1780042e+01   1.2239524e+01
   2.1997912e+01  -2.1945073e+01   5.0000000e+01   8.9357942e-01  -2.4306528e+01   1.1769236e+01
   2.1861340e+01  -2.1966586e+01   5.0000000e+01   5.3361586e-01  -2.8132486e+01   1.2227290e+01
   2.1725799e+01  -2.1993229e+01   5.0000000e+01  -1.2620600e+00  -3.2708437e+01   1.4152917e+01
   2.1591512e+01  -2.2024961e+01   5.0000000e+01  -4.3336610e+00  -3.7576280e+01   1.8170128e+01
   2.1458695e+01  -2.2061730e+01   5.0000000e+01  -8.2314792e+00  -4.1893989e+01   2.5057599e+01
   2.1327566e+01  -2.2103475e+01   5.0000000e+01  -1.2258998e+01  -4.3991463e+01   3.5080363e+01
   2.1198337e+01  -2.2150129e+01   5.0000000e+01  -1.5632406e+01  -4.2153067e+01   4.6980328e+01
   2.1071220e+01  -2.2201616e+01   5.0000000e+01  -1.7801252e+01  -3.6154340e+01   5.8361687e+01
   2.0946424e+01  -2.2257853e+01   5.0000000e+01  -1.8557841e+01  -2.7495819e+01   6.7254725e+01
   2.0824155e+01  -2.2318747e+01   5.0000000e+01  -1.7949227e+01  -1.8317664e+01   7.2961708e+01
   2.0704614e+01  -2.2384199e+01   5.0000000e+01  -1.6221338e+01  -1.0439502e+01   7.5886217e+01
   2.0588000e+01  -2.2454103e+01   5.0000000e+01  -1.3698232e+01  -4.8958659e+00   7.7120647e+01
   2.0474506e+01  -2.2528343e+01   5.0000000e+01  -1.0513684e+01  -1.7683673e+00   7.7908610e+01
   2.0364324e+01  -2.2606800e+01   5.0000000e+01  -6.5046660e+00  -3.9299963e-01   7.9070361e+01
   2.0257639e+01  -2.2689343e+01   5.0000000e+01  -1.3720153e+00   2.5559791e-01   8.0677733e+01
   2.0154632e+01  -2.2775838e+01   5.0000000e+01   5.0562841e+00   1.1194645e+00   8.1985499e+01
   2.0055477e+01  -2.2866142e+01   5.0000000e+01   1.2520410e+01   2.6246208e+00   8.1731037e+01
   1.9960346e+01  -2.2960106e+01   5.0000000e+01   2.0205735e+01   4.4712441e+00   7.8874952e+01
   1.9869404e+01  -2.3057577e+01   5.0000000e+01   2.7092405e+01   5.8851678e+00   7.3306495e+01
   1.9782808e+01  -2.3158392e+01   5.0000000e+01   3.2489835e+01   6.1586605e+00   6.5866811e+01
   1.9700711e+01  -2.3262384e+01   5.0000000e+01   3.6284584e+01   5.0542511e+00   5.7734106e+01
   1.9623261e+01  -2.3369382e+01   5.0000000e+01   3.8684875e+01   2.7667000e+00   4.9654318e+01
   1.9550595e+01  -2.3479208e+01   5.0000000e+01   3.9681546e+01  -4.3756036e-01   4.1855706e+01
   1.9482847e+01  -2.3591678e+01   5.0000000e+01   3.8972416e+01  -4.3446847e+00   3.4627095e+01
   1.9420141e+01  -2.3706605e+01   5.0000000e+01   3.6404657e+01  -8.6617929e+00   2.8576828e+01
   1.9362596e+01  -2.3823796e+01   5.0000000e+01   3.2303686e+01  -1.2971823e+01   2.4390702e+01
   1.9310322e+01  -2.3943055e+01   5.0000000e+01   2.7540406e+01  -1.6848916e+01   2.2566065e+01
   1.9263420e+01  -2.4064182e+01   5.0000000e+01   2.3489995e+01  -1.9989915e+01   2.3132718e+01
   1.9221985e+01  -2.4186972e+01   5.0000000e+01   2.1631170e+01  -2.2267170e+01   2.5262457e+01
   1.9186102e+01  -2.4311218e+01   5.0000000e+01   2.2807862e+01  -2.3746617e+01   2.7262827e+01
   1.9155847e+01  -2.4436709e+01   5.0000000e+01   2.6701007e+01  -2.4661378e+01   2.7146904e+01
   1.9131290e+01  -2.4563232e+01   5.0000000e+01   3.1773924e+01  -2.5381386e+01   2.3492815e+01
   1.9112488e+01  -2.4690571e+01   5.0000000e+01   3.5816189e+01  -2.6416924e+01   1.6241995e+01
   1.9099491e+01  -2.4818509e+01   5.0000000e+01   3.7045653e+01  -2.8233761e+01   6.8726439e+00
   1.9092340e+01  -2.4946827e+01   5.0000000e+01   3.5019901e+01  -3.0779215e+01  -2.4984753e+00
   1.9091065e+01  -2.5075303e+01   5.0000000e+01   3.0506695e+01  -3.3340611e+01  -1.0237369e+01
   1.9095686e+01  -2.5203716e+01   5.0000000e+01   2.5014716e+01  -3.5084044e+01  -1.5640227e+01
   1.9106215e+01  -2.5331844e+01   5.0000000e+01   2.0136705e+01  -3.5592919e+01  -1.9258024e+01
   1.9122651e+01  -2.5459465e+01   5.0000000e+01   1.6351388e+01  -3.4895264e+01  -2.2572140e+01
   1.9144986e+01  -2.5586355e+01   5.0000000e+01   1.2578083e+01  -3.3130385e+01  -2.6522188e+01
   1.9173198e+01  -2.5712294e+01   5.0000000e+01   7.4199975e+00  -3.0349355e+01  -3.0355049e+01
   1.9207258e+01  -2.5837061e+01   5.0000000e+01   6.0930050e-01  -2.6755141e+01  -3.2239475e+01
   1.9247123e+01  -2.5960436e+01   5.0000000e+01  -6.7964059e+00  -2.3029337e+01  -3.0733929e+01
   1.9292743e+01  -2.6082202e+01   5.0000000e+01  -1.3230317e+01  -2.0160162e+01  -2.5801394e+01
   1.9344055e+01  -2.6202142e+01   5.0000000e+01  -1.7576791e+01  -1.8934060e+01  -1.8473366e+01
   1.9400984e+01  -2.6320044e+01   5.0000000e+01  -1.9109296e+01  -1.9748025e+01  -1.0115135e+01
   1.9463449e+01  -2.6435698e+01   5.0000000e+01  -1.7460938e+01  -2.2541133e+01  -2.6867778e+00
   1.9531353e+01  -2.6548897e+01   5.0000000e+01  -1.3445936e+01  -2.6709636e+01   1.6148915e+00
   1.9604592e+01  -2.6659438e+01   5.0000000e+01  -9.0090835e+00  -3.1394100e+01   1.6560266e+00
   1.9683050e+01  -2.6767121e+01   5.0000000e+01  -6.1552533e+00  -3.5596298e+01  -2.0890950e+00
   1.9766599e+01  -2.6871753e+01   5.0000000e+01  -5.8919936e+00  -3.8162174e+01  -7.7628777e+00
   1.9855105e+01  -2.6973144e+01   5.0000000e+01  -7.7196984e+00  -3.8374534e+01  -1.3122724e+01
   2.0276273e+01  -2.7525541e+01   5.0000000e+01  -1.4873713e+01  -2.1895166e+01  -1.4435972e+01
   2.0391263e+01  -2.7604104e+01   5.0000000e+01  -1.5011573e+01  -2.1627814e+01  -1.4432227e+01
   2.0509864e+01  -2.7678433e+01   5.0000000e+01  -1.5026010e+01  -2.3057423e+01  -1.6178990e+01
   2.0631879e+01  -2.7748401e+01   5.0000000e+01  -1.4833751e+01  -2.5061378e+01  -1.9921871e+01
   2.0757106e+01  -2.7813887e+01   5.0000000e+01  -1.4064561e+01  -2.6199777e+01  -2.5175637e+01
   2.0885336e+01  -2.7874777e+01   5.0000000e+01  -1.2310219e+01  -2.5272610e+01  -3.0980160e+01
   2.1016352e+01  -2.7930967e+01   5.0000000e+01  -9.4085143e+00  -2.1782507e+01  -3.6353465e+01
   2.1149934e+01  -2.7982360e+01   5.0000000e+01  -5.7314444e+00  -1.5775657e+01  -4.0803749e+01
   2.1285852e+01  -2.8028866e+01   5.0000000e+01  -2.2998456e+00  -7.5111575e+00  -4.3577818e+01
   2.1423876e+01  -2.8070404e+01   5.0000000e+01   1.1978062e-01   1.6096244e+00  -4.3335922e+01
   2.1563767e+01  -2.8106902e+01   5.0000000e+01   1.7139803e+00   9.2488001e+00  -3.9799545e+01
   2.1705286e+01  -2.8138297e+01   5.0000000e+01   3.1031191e+00   1.3900608e+01  -3.4325520e+01
   2.1848187e+01  -2.8164533e+01   5.0000000e+01   4.8018372e+00   1.5665441e+01  -2.8740030e+01
   2.1992222e+01  -2.8185565e+01   5.0000000e+01   7.1747494e+00   1.5539546e+01  -2.4386524e+01
   2.2137143e+01  -2.8201357e+01   5.0000000e+01   1.0269546e+01   1.4803616e+01  -2.2239509e+01
   2.2282695e+01  -2.8211879e+01   5.0000000e+01   1.3522198e+01   1.5091952e+01  -2.2695633e+01
   2.2428627e+01  -2.8217116e+01   5.0000000e+01   1.5621423e+01   1.7863508e+01  -2.4951779e+01
   2.2574683e+01  -2.8217055e+01   5.0000000e+01   1.5033964e+01   2.3561051e+01  -2.7062727e+01
   2.2720608e+01  -2.8211700e+01   5.0000000e+01   1.1526029e+01   3.0946577e+01  -2.6591387e+01
   2.2866149e+01  -2.8201057e+01   5.0000000e+01   6.7958585e+00   3.7819675e+01  -2.2619141e+01
   2.3011052e+01  -2.8185146e+01   5.0000000e+01   1.7254888e+00   4.3878951e+01  -1.5498440e+01
   2.3155065e+01  -2.8163996e+01   5.0000000e+01  -4.8178516e+00   4.8905167e+01  -3.9262635e+00
   2.3297937e+01  -2.8137642e+01   5.0000000e+01  -1.2772643e+01   4.9070762e+01   1.1761899e+01
   2.3439422e+01  -2.8106131e+01   5.0000000e+01  -2.0442339e+01   4.1998307e+01   2.5230014e+01
   2.3579274e+01  -2.8069518e+01   5.0000000e+01  -2.6189284e+01   3.2923063e+01   3.0649078e+01
   2.3717252e+01  -2.8027866e+01   5.0000000e+01  -2.8652867e+01   2.7692045e+01   3.1075089e+01
   2.3853120e+01  -2.7981249e+01   5.0000000e+01  -2.8368135e+01   2.4768372e+01   3.1761720e+01
   2.3986646e+01  -2.7929747e+01   5.0000000e+01  -2.7433406e+01   2.1598027e+01   3.2329728e+01
   2.4117601e+01  -2.7873449e+01   5.0000000e+01  -2.6987813e+01   1.9453504e+01   3.1453968e+01
   2.4245765e+01  -2.7812453e+01   5.0000000e+01  -2.7144541e+01   1.9700358e+01   3.0287028e+01
   2.4370922e+01  -2.7746865e+01   5.0000000e+01  -2.7827327e+01   2.1675646e+01   3.0210750e+01
   2.4492862e+01  -2.7676797e+01   5.0000000e+01  -2.8916634e+01   2.3893575e+01   3.1177622e+01
   2.4611383e+01  -2.7602370e+01   5.0000000e+01  -3.0142333e+01   2.5556813e+01   3.2163689e+01
   2.4726290e+01  -2.7523713e+01   5.0000000e+01  -3.0756560e+01   2.6965711e+01   3.2547457e+01
   2.4837393e+01  -2.7440959e+01   5.0000000e+01  -2.9842057e+01   2.8435779e+01   3.3251691e+01
   2.4944514e+01  -2.7354250e+01   5.0000000e+01  -2.7499955e+01   2.8895348e+01   3.5538083e+01
   2.5047479e+01  -2.7263734e+01   5.0000000e+01  -2.4870707e+01   2.7002582e+01   3.8810200e+01
   2.5146126e+01  -2.7169566e+01   5.0000000e+01  -2.2823582e+01   2.3110851e+01   4.1299393e+01
   2.5240299e+01  -2.7071903e+01   5.0000000e+01  -2.1381808e+01   1.8668672e+01   4.2322371e+01
   2.5329851e+01  -2.6970912e+01   5.0000000e+01  -2.0514939e+01   1.4440003e+01   4.2339403e+01
   2.5414645e+01  -2.6866763e+01   5.0000000e+01  -2.0413432e+01   1.0484678e+01   4.1404967e+01
   2.5494552e+01  -2.6759630e+01   5.0000000e+01  -2.1105775e+01   6.8586333e+00   3.9099397e+01
   2.5569454e+01  -2.6649693e+01   5.0000000e+01  -2.2423500e+01   3.5923877e+00   3.4976706e+01
   2.5639242e+01  -2.6537136e+01   5.0000000e+01  -2.3706420e+01   7.6635292e-01   2.8859724e+01
   2.5703813e+01  -2.6422145e+01   5.0000000e+01  -2.4016981e+01  -1.5085136e+00   2.1484234e+01
   2.5763079e+01  -2.6304912e+01   5.0000000e+01  -2.2799067e+01  -3.4573267e+00   1.4243791e+01
   2.5816957e+01  -2.6185630e+01   5.0000000e+01  -2.0139007e+01  -5.6116604e+00   8.3871657e+00
   2.5865377e+01  -2.6064495e+01   5.0000000e+01  -1.6610412e+01  -8.2706332e+00   4.4020244e+00
   2.5908276e+01  -2.5941708e+01   5.0000000e+01  -1.2725859e+01  -1.1122660e+01   2.2591205e+00
   2.5945602e+01  -2.5817467e+01   5.0000000e+01  -8.9852808e+00  -1.3529638e+01   2.0143972e+00
   2.5977311e+01  -2.5691977e+01   5.0000000e+01  -6.2782650e+00  -1.4975059e+01   3.6071416e+00
   2.6003372e+01  -2.5565441e+01   5.0000000e+01  -5.5281355e+00  -1.5156492e+01   6.0924222e+00
   2.6023759e+01  -2.5438065e+01   5.0000000e+01  -6.4575425e+00  -1.3910569e+01   7.8587377e+00
   2.6038458e+01  -2.5310053e+01   5.0000000e+01  -7.4005309e+00  -1.1401312e+01   8.1652125e+00
   2.6047463e+01  -2.5181612e+01   5.0000000e+01  -6.9434670e+00  -8.1018595e+00   7.8376251e+00
   2.6050779e+01  -2.5052948e+01   5.0000000e+01  -4.8007238e+00  -4.3349985e+00   8.0440304e+00
   2.6048417e+01  -2.4924267e+01   5.0000000e+01  -1.3055377e+00  -1.7204367e-01   1.0124847e+01
   2.6040400e+01  -2.4795773e+01   5.0000000e+01   1.7853769e+00   4.1682864e+00   1.5220921e+01
   2.6026758e+01  -2.4667672e+01   5.0000000e+01   1.9384813e+00   8.2345160e+00   2.2545049e+01
   2.6007529e+01  -2.4540166e+01   5.0000000e+01  -2.5226042e+00   1.1653754e+01   2.9416672e+01
   2.5982761e+01  -2.4413457e+01   5.0000000e+01  -1.1113989e+01   1.4124591e+01   3.2340222e+01
   2.5952508e+01  -2.4287744e+01   5.0000000e+01  -2.0926057e+01   1.5229180e+01   2.9426307e+01
   2.5916835e+01  -2.4163224e+01   5.0000000e+01  -2.8945609e+01   1.4741138e+01   2.1941616e+01
   2.5875813e+01  -2.4040093e+01   5.0000000e+01  -3.4592949e+01   1.3294065e+01   1.2314862e+01
   2.5829521e+01  -2.3918543e+01   5.0000000e+01  -3.8139623e+01   1.1869831e+01   5.5181460e-01
   2.5778045e+01  -2.3798764e+01   5.0000000e+01  -3.7320182e+01   1.0308665e+01  -1.3529861e+01
   2.5721479e+01  -2.3680941e+01   5.0000000e+01  -3.0295216e+01   8.0203271e+00  -2.6365904e+01
   2.5659924e+01  -2.3565257e+01   5.0000000e+01  -1.9254073e+01   5.3112026e+00  -3.3902446e+01
   2.5593487e+01  -2.3451890e+01   5.0000000e+01  -8.2848498e+00   2.8105257e+00  -3.5450584e+01
   2.5522283e+01  -2.3341017e+01   5.0000000e+01  -1.8931246e-01   7.7894600e-01  -3.3121280e+01
   2.5446433e+01  -2.3232808e+01   5.0000000e+01   4.6202509e+00  -8.0811397e-01  -2.9428575e+01
   2.5366063e+01  -2.3127428e+01   5.0000000e+01   6.9199501e+00  -1.9134433e+00  -2.5809966e+01
   2.5281307e+01  -2.3025039e+01   5.0000000e+01   7.5149156e+00  -2.6053416e+00  -2.3115521e+01
   2.5192303e+01  -2.2925798e+01   5.0000000e+01   7.2789711e+00  -3.3418507e+00  -2.1595139e+01
   2.5099196e+01  -2.2829857e+01   5.0000000e+01   6.7943202e+00  -4.4201826e+00  -2.0723358e+01
   2.5002135e+01  -2.2737362e+01   5.0000000e+01   6.2153470e+00  -5.6873435e+00  -1.9989384e+01
   2.4901275e+01  -2.2648453e+01   5.0000000e+01   5.5355003e+00  -6.8469501e+00  -1.9392980e+01
   2.4796777e+01  -2.2563265e+01   5.0000000e+01   4.8996752e+00  -7.8891948e+00  -1.9358465e+01
   2.4688803e+01  -2.2481928e+01   5.0000000e+01   4.8801518e+00  -9.1282484e+00  -2.0022664e+01
   2.4577524e+01  -2.2404565e+01   5.0000000e+01   6.1139051e+00  -1.0622918e+01  -2.0678660e+01
   2.4463110e+01  -2.2331292e+01   5.0000000e+01   8.4783649e+00  -1.1946466e+01  -2.0403794e+01
   2.4345741e+01  -2.2262222e+01   5.0000000e+01   1.1136259e+01  -1.2748824e+01  -1.8961213e+01
   2.4225595e+01  -2.2197457e+01   5.0000000e+01   1.3298592e+01  -1.2914919e+01  -1.6563286e+01
   2.4102858e+01  -2.2137095e+01   5.0000000e+01   1.4193748e+01  -1.2268224e+01  -1.3615320e+01
   2.3977715e+01  -2.2081227e+01   5.0000000e+01   1.2866045e+01  -1.0851255e+01  -1.1018070e+01
   2.3850358e+01  -2.2029938e+01   5.0000000e+01   9.0556095e+00  -9.1441269e+00  -1.0173033e+01
   2.3720978e+01  -2.1983304e+01   5.0000000e+01   4.1429442e+00  -8.4270692e+00  -1.2053760e+01
   2.3589772e+01  -2.1941395e+01   5.0000000e+01   1.7067778e-01  -1.0144468e+01  -1.5180538e+01
   2.3456937e+01  -2.1904275e+01   5.0000000e+01  -2.2436227e+00  -1.3721447e+01  -1.6975020e+01
   2.3322672e+01  -2.1871998e+01   5.0000000e+01  -3.6676084e+00  -1.7765188e+01  -1.6884436e+01
   2.3187180e+01  -2.1844614e+01   5.0000000e+01  -4.6704818e+00  -2.1818506e+01  -1.4973220e+01
   2.3050662e+01  -2.1822163e+01   5.0000000e+01  -5.7327135e+00  -2.5165387e+01  -1.0978161e+01
   2.2913322e+01  -2.1804679e+01   5.0000000e+01  -6.8914308e+00  -2.6940144e+01  -5.5580697e+00
   2.2775366e+01  -2.1792188e+01   5.0000000e+01  -7.6647958e+00  -2.7192821e+01   1.1495595e-01
   2.2637000e+01  -2.1784709e+01   5.0000000e+01  -7.6625514e+00  -2.6480260e+01   5.3604124e+00
   2.2498430e+01  -2.1782252e+01   5.0000000e+01  -6.9027290e+00  -2.5146223e+01   9.7975175e+00
   2.2359861e+01  -2.1784823e+01   5.0000000e+01  -5.6632745e+00  -2.3587139e+01   1.2915135e+01
   2.2221502e+01  -2.1792416e+01   5.0000000e+01  -4.3095612e+00  -2.2648471e+01   1.4447450e+01
   2.2083558e+01  -2.1805020e+01   5.0000000e+01  -3.2237486e+00  -2.3103520e+01   1.4900381e+01
   2.1946235e+01  -2.1822617e+01   5.0000000e+01  -2.7346113e+00  -2.4974715e+01   1.5185511e+01
   2.1809738e+01  -2.1845180e+01   5.0000000e+01  -3.1487210e+00  -2.7776384e+01   1.5943774e+01
   2.1674271e+01  -2.1872676e+01   5.0000000e+01  -4.7320882e+00  -3.1194638e+01   1.7571234e+01
   2.1540036e+01  -2.1905063e+01   5.0000000e+01  -7.4408042e+00  -3.5050865e+01   2.0838234e+01
   2.1407236e+01  -2.1942292e+01   5.0000000e+01  -1.0840957e+01  -3.8455870e+01   2.6776306e+01
   2.1276069e+01  -2.1984309e+01   5.0000000e+01  -1.4314669e+01  -3.9586975e+01   3.5552421e+01
   2.1146733e+01  -2.2031049e+01   5.0000000e+01  -1.7324929e+01  -3.6843826e+01   4.5659512e+01
   2.1019424e+01  -2.2082443e+01   5.0000000e+01  -1.9614165e+01  -3.0327972e+01   5.4739633e+01
   2.0894334e+01  -2.2138413e+01   5.0000000e+01  -2.1082751e+01  -2.1726801e+01   6.1256488e+01
   2.0771653e+01  -2.2198876e+01   5.0000000e+01  -2.1681222e+01  -1.3010439e+01   6.4999030e+01
   2.0651568e+01  -2.2263739e+01   5.0000000e+01  -2.1494108e+01  -5.6475187e+00   6.6619520e+01
   2.0534263e+01  -2.2332907e+01   5.0000000e+01  -2.0692031e+01  -4.2355742e-01   6.7215022e+01
   2.0419919e+01  -2.2406273e+01   5.0000000e+01  -1.9316116e+01   2.6082490e+00   6.7978891e+01
   2.0308713e+01  -2.2483727e+01   5.0000000e+01  -1.7135055e+01   4.0465486e+00   6.9767886e+01
   2.0200816e+01  -2.2565153e+01   5.0000000e+01  -1.3721364e+01   4.8515441e+00   7.2684313e+01
   2.0096398e+01  -2.2650427e+01   5.0000000e+01  -8.6837228e+00   5.8968134e+00   7.5952639e+01
   1.9995623e+01  -2.2739418e+01   5.0000000e+01  -1.9465223e+00   7.5938719e+00   7.8183058e+01
   1.9898650e+01  -2.2831994e+01   5.0000000e+01   5.9572238e+00   9.6959481e+00   7.7948042e+01
   1.9805634e+01  -2.2928011e+01   5.0000000e+01   1.3926301e+01   1.1426884e+01   7.4611942e+01
   1.9716725e+01  -2.3027325e+01   5.0000000e+01   2.0862322e+01   1.2014418e+01   6.8720418e+01
   1.9632067e+01  -2.3129783e+01   5.0000000e+01   2.6196446e+01   1.1198432e+01   6.1514980e+01
   1.9551798e+01  -2.3235229e+01   5.0000000e+01   2.9947939e+01   9.2491450e+00   5.4067296e+01
   1.9476052e+01  -2.3343501e+01   5.0000000e+01   3.2323757e+01   6.5594847e+00   4.6816800e+01
   1.9404954e+01  -2.3454432e+01   5.0000000e+01   3.3290914e+01   3.3625628e+00   3.9870382e+01
   1.9338627e+01  -2.3567853e+01   5.0000000e+01   3.2625744e+01  -1.9518591e-01   3.3518637e+01
   1.9277184e+01  -2.3683587e+01   5.0000000e+01   3.0285274e+01  -3.9216813e+00   2.8337267e+01
   1.9220732e+01  -2.3801457e+01   5.0000000e+01   2.6642155e+01  -7.5986386e+00   2.4944905e+01
   1.9169372e+01  -2.3921279e+01   5.0000000e+01   2.2520837e+01  -1.1030787e+01   2.3799789e+01
   1.9123198e+01  -2.4042867e+01   5.0000000e+01   1.9175748e+01  -1.4013346e+01   2.4933675e+01
   1.9082297e+01  -2.4166031e+01   5.0000000e+01   1.7934926e+01  -1.6398800e+01   2.7545080e+01
   1.9046746e+01  -2.4290580e+01   5.0000000e+01   1.9552240e+01  -1.8264629e+01   3.0005487e+01
   1.9016617e+01  -2.4416318e+01   5.0000000e+01   2.3754221e+01  -1.9905750e+01   3.0374342e+01
   1.8991974e+01  -2.4543048e+01   5.0000000e+01   2.9065524e+01  -2.1663751e+01   2.7175888e+01
   1.8972871e+01  -2.4670569e+01   5.0000000e+01   3.3196407e+01  -2.3847887e+01   2.0377620e+01
   1.8959356e+01  -2.4798682e+01   5.0000000e+01   3.4382217e+01  -2.6637921e+01   1.1737060e+01
   1.8951466e+01  -2.4927181e+01   5.0000000e+01   3.2531708e+01  -2.9847163e+01   3.4945582e+00
   1.8949233e+01  -2.5055864e+01   5.0000000e+01   2.8683955e+01  -3.2953706e+01  -3.1075457e+00
   1.8952678e+01  -2.5184526e+01   5.0000000e+01   2.4146815e+01  -3.5422290e+01  -7.8091883e+00
   1.8961812e+01  -2.5312959e+01   5.0000000e+01   2.0165115e+01  -3.6933407e+01  -1.1189497e+01
   1.8976640e+01  -2.5440959e+01   5.0000000e+01   1.7144295e+01  -3.7420179e+01  -1.4493156e+01
   1.8997156e+01  -2.5568319e+01   5.0000000e+01   1.4197348e+01  -3.6926220e+01  -1.8607023e+01
   1.9023345e+01  -2.5694833e+01   5.0000000e+01   1.0004950e+01  -3.5409405e+01  -2.3118331e+01
   1.9055182e+01  -2.5820297e+01   5.0000000e+01   4.0033769e+00  -3.2736594e+01  -2.6615871e+01
   1.9092635e+01  -2.5944507e+01   5.0000000e+01  -3.3312342e+00  -2.9044947e+01  -2.7520553e+01
   1.9135659e+01  -2.6067259e+01   5.0000000e+01  -1.0724629e+01  -2.5114930e+01  -2.4904962e+01
   1.9184203e+01  -2.6188354e+01   5.0000000e+01  -1.6765887e+01  -2.2055838e+01  -1.8997943e+01
   1.9238205e+01  -2.6307592e+01   5.0000000e+01  -2.0299566e+01  -2.0669104e+01  -1.0854547e+01
   1.9297592e+01  -2.6424776e+01   5.0000000e+01  -2.0439910e+01  -2.1286046e+01  -2.2806293e+00
   1.9362282e+01  -2.6539714e+01   5.0000000e+01  -1.7410298e+01  -2.3738689e+01   4.2117629e+00
   1.9432187e+01  -2.6652214e+01   5.0000000e+01  -1.3032076e+01  -2.7424304e+01   6.8765865e+00
   1.9507204e+01  -2.6762089e+01   5.0000000e+01  -9.4121919e+00  -3.1620661e+01   5.7793464e+00
   1.9587223e+01  -2.6869156e+01   5.0000000e+01  -7.6254726e+00  -3.5456776e+01   2.1391956e+00
   1.9672127e+01  -2.6973236e+01   5.0000000e+01  -7.5705671e+00  -3.7862994e+01  -2.6058447e+00
   1.9761785e+01  -2.7074154e+01   5.0000000e+01  -8.5531775e+00  -3.8121871e+01  -7.2972767e+00
   1.9856060e+01  -2.7171739e+01   5.0000000e+01  -9.9771526e+00  -3.6261453e+01  -1.1311037e+01
   1.9954807e+01  -2.7265827e+01   5.0000000e+01  -1.1620741e+01  -3.2724139e+01  -1.4227294e+01
   2.0057868e+01  -2.7356258e+01   5.0000000e+01  -1.3234252e+01  -2.8309963e+01  -1.5546223e+01
   2.0165081e+01  -2.7442878e+01   5.0000000e+01  -1.4376541e+01  -2.4282026e+01  -1.5274461e+01
   2.0686306e+01  -2.7925669e+01   5.0000000e+01  -1.9745627e+01  -2.9562101e+01  -1.7870852e+01
   2.0814779e+01  -2.7986786e+01   5.0000000e+01  -1.7705804e+01  -3.1293158e+01  -2.3636995e+01
   2.0945959e+01  -2.8043369e+01   5.0000000e+01  -1.3575270e+01  -2.9922825e+01  -3.0987261e+01
   2.1079638e+01  -2.8095326e+01   5.0000000e+01  -8.4683190e+00  -2.4910159e+01  -3.9100844e+01
   2.1215606e+01  -2.8142574e+01   5.0000000e+01  -4.1432336e+00  -1.6259064e+01  -4.6160600e+01
   2.1353647e+01  -2.8185037e+01   5.0000000e+01  -1.6488161e+00  -5.5768572e+00  -4.9378001e+01
   2.1493540e+01  -2.8222644e+01   5.0000000e+01  -5.1323809e-01   3.9788102e+00  -4.7652352e+01
   2.1635060e+01  -2.8255337e+01   5.0000000e+01   4.7064930e-01   1.0190303e+01  -4.2538879e+01
   2.1777982e+01  -2.8283060e+01   5.0000000e+01   2.1841942e+00   1.2784613e+01  -3.6472821e+01
   2.1922073e+01  -2.8305770e+01   5.0000000e+01   5.0352070e+00   1.2698614e+01  -3.1557115e+01
   2.2067101e+01  -2.8323429e+01   5.0000000e+01   8.9414648e+00   1.1482506e+01  -2.9350765e+01
   2.2212832e+01  -2.8336008e+01   5.0000000e+01   1.3028902e+01   1.1279918e+01  -3.0737207e+01
   2.2359029e+01  -2.8343488e+01   5.0000000e+01   1.5561791e+01   1.4523737e+01  -3.4981560e+01
   2.2505454e+01  -2.8345856e+01   5.0000000e+01   1.4460850e+01   2.2439895e+01  -3.8949835e+01
   2.2651871e+01  -2.8343107e+01   5.0000000e+01   9.0328067e+00   3.2904562e+01  -3.8349829e+01
   2.2798041e+01  -2.8335247e+01   5.0000000e+01   1.7654651e+00   4.1317802e+01  -3.2525877e+01
   2.2943728e+01  -2.8322288e+01   5.0000000e+01  -4.1806950e+00   4.7342532e+01  -2.4643902e+01
   2.3088695e+01  -2.8304252e+01   5.0000000e+01  -8.6740279e+00   5.3827367e+01  -1.3331362e+01
   2.3232707e+01  -2.8281167e+01   5.0000000e+01  -1.2928650e+01   5.7333141e+01   4.6301180e+00
   2.3375531e+01  -2.8253072e+01   5.0000000e+01  -1.6988874e+01   5.2144756e+01   2.4068664e+01
   2.3516939e+01  -2.8220012e+01   5.0000000e+01  -2.0530324e+01   4.0633637e+01   3.6233757e+01
   2.3656701e+01  -2.8182041e+01   5.0000000e+01  -2.3153833e+01   3.0249902e+01   3.9690578e+01
   2.3794595e+01  -2.8139219e+01   5.0000000e+01  -2.4048664e+01   2.3930621e+01   3.9278815e+01
   2.3930400e+01  -2.8091618e+01   5.0000000e+01  -2.3367955e+01   1.9753483e+01   3.8159997e+01
   2.4063901e+01  -2.8039313e+01   5.0000000e+01  -2.2232266e+01   1.6732215e+01   3.6333195e+01
   2.4194885e+01  -2.7982389e+01   5.0000000e+01  -2.1206000e+01   1.5669719e+01   3.4148717e+01
   2.4323149e+01  -2.7920938e+01   5.0000000e+01  -2.0346662e+01   1.6624098e+01   3.3047183e+01
   2.4448489e+01  -2.7855059e+01   5.0000000e+01  -1.9886744e+01   1.8442690e+01   3.3780040e+01
   2.4570713e+01  -2.7784858e+01   5.0000000e+01  -2.0175403e+01   2.0032608e+01   3.5759748e+01
   2.4689631e+01  -2.7710446e+01   5.0000000e+01  -2.1280850e+01   2.0980959e+01   3.7840877e+01
   2.4805061e+01  -2.7631944e+01   5.0000000e+01  -2.2538452e+01   2.1368761e+01   3.9186960e+01
   2.4916827e+01  -2.7549475e+01   5.0000000e+01  -2.2796582e+01   2.1205599e+01   4.0106213e+01
   2.5024761e+01  -2.7463172e+01   5.0000000e+01  -2.1700581e+01   1.9785436e+01   4.1421494e+01
   2.5128703e+01  -2.7373171e+01   5.0000000e+01  -1.9921433e+01   1.6537292e+01   4.2903597e+01
   2.5228498e+01  -2.7279614e+01   5.0000000e+01  -1.8163903e+01   1.2084142e+01   4.3706774e+01
   2.5324001e+01  -2.7182650e+01   5.0000000e+01  -1.6696876e+01   7.4968336e+00   4.3571917e+01
   2.5415073e+01  -2.7082429e+01   5.0000000e+01  -1.5624105e+01   3.2440032e+00   4.2663709e+01
   2.5501585e+01  -2.6979111e+01   5.0000000e+01  -1.5156122e+01  -4.5961423e-01   4.0887900e+01
   2.5583414e+01  -2.6872856e+01   5.0000000e+01  -1.5553214e+01  -3.1746856e+00   3.8071764e+01
   2.5660449e+01  -2.6763829e+01   5.0000000e+01  -1.7073160e+01  -4.6622277e+00   3.4154201e+01
   2.5732583e+01  -2.6652200e+01   5.0000000e+01  -1.9568415e+01  -5.0681114e+00   2.8886945e+01
   2.5799720e+01  -2.6538143e+01   5.0000000e+01  -2.2106994e+01  -4.7455090e+00   2.2366275e+01
   2.5861772e+01  -2.6421832e+01   5.0000000e+01  -2.3694920e+01  -4.3747319e+00   1.5363936e+01
   2.5918660e+01  -2.6303447e+01   5.0000000e+01  -2.3793366e+01  -4.7325306e+00   8.6383935e+00
   2.5970313e+01  -2.6183169e+01   5.0000000e+01  -2.2325197e+01  -6.1979135e+00   2.6864375e+00
   2.6016669e+01  -2.6061182e+01   5.0000000e+01  -1.9468307e+01  -8.5892101e+00  -2.1799830e+00
   2.6057675e+01  -2.5937671e+01   5.0000000e+01  -1.5454579e+01  -1.1318159e+01  -5.4943338e+00
   2.6093286e+01  -2.5812825e+01   5.0000000e+01  -1.0903505e+01  -1.3681574e+01  -6.6123580e+00
   2.6123465e+01  -2.5686832e+01   5.0000000e+01  -7.0550346e+00  -1.5145603e+01  -5.3549937e+00
   2.6148185e+01  -2.5559882e+01   5.0000000e+01  -5.0195466e+00  -1.5451517e+01  -2.6670354e+00
   2.6167426e+01  -2.5432165e+01   5.0000000e+01  -4.6633097e+00  -1.4553875e+01  -7.5363716e-02
   2.6181176e+01  -2.5303873e+01   5.0000000e+01  -4.6330870e+00  -1.2662428e+01   1.5727229e+00
   2.6189434e+01  -2.5175198e+01   5.0000000e+01  -3.5891543e+00  -1.0108175e+01   2.7130853e+00
   2.6192204e+01  -2.5046330e+01   5.0000000e+01  -1.0263922e+00  -7.0638949e+00   4.4584186e+00
   2.6189500e+01  -2.4917461e+01   5.0000000e+01   2.5937854e+00  -3.7379867e+00   8.3683911e+00
   2.6181342e+01  -2.4788782e+01   5.0000000e+01   5.2352330e+00  -5.0386583e-01   1.5365830e+01
   2.6167759e+01  -2.4660481e+01   5.0000000e+01   4.5001532e+00   2.4610756e+00   2.4285423e+01
   2.6148789e+01  -2.4532749e+01   5.0000000e+01  -9.8347095e-01   5.2636935e+00   3.2420029e+01
   2.6124475e+01  -2.4405771e+01   5.0000000e+01  -1.0693240e+01   7.9059216e+00   3.6336772e+01
   2.6094868e+01  -2.4279733e+01   5.0000000e+01  -2.1770672e+01   9.9828962e+00   3.3878377e+01
   2.6060027e+01  -2.4154819e+01   5.0000000e+01  -3.0959534e+01   1.0939387e+01   2.5816552e+01
   2.6020018e+01  -2.4031210e+01   5.0000000e+01  -3.7015045e+01   1.0679931e+01   1.4721710e+01
   2.5974912e+01  -2.3909085e+01   5.0000000e+01  -4.0247254e+01   9.8887525e+00   1.8492172e+00
   2.5924790e+01  -2.3788621e+01   5.0000000e+01  -3.9336332e+01   8.8981014e+00  -1.2693058e+01
   2.5869736e+01  -2.3669991e+01   5.0000000e+01  -3.2434796e+01   7.2685628e+00  -2.6176115e+01
   2.5809843e+01  -2.3553365e+01   5.0000000e+01  -2.1150832e+01   5.0487159e+00  -3.4531750e+01
   2.5745208e+01  -2.3438912e+01   5.0000000e+01  -9.5769807e+00   2.9452126e+00  -3.6553349e+01
   2.5675937e+01  -2.3326794e+01   5.0000000e+01  -8.5119427e-01   1.4508244e+00  -3.4288794e+01
   2.5602138e+01  -2.3217172e+01   5.0000000e+01   4.4640652e+00   4.3685422e-01  -3.0612849e+01
   2.5523926e+01  -2.3110201e+01   5.0000000e+01   7.3865969e+00  -3.0138737e-01  -2.6987377e+01
   2.5441424e+01  -2.3006035e+01   5.0000000e+01   8.6928059e+00  -6.0223948e-01  -2.3874644e+01
   2.5354757e+01  -2.2904819e+01   5.0000000e+01   8.9208593e+00  -5.6037953e-01  -2.1768289e+01
   2.5264056e+01  -2.2806699e+01   5.0000000e+01   8.6355658e+00  -7.3201138e-01  -2.0699453e+01
   2.5169457e+01  -2.2711812e+01   5.0000000e+01   8.1316950e+00  -1.4864447e+00  -2.0234147e+01
   2.5071102e+01  -2.2620292e+01   5.0000000e+01   7.5260447e+00  -2.7118339e+00  -2.0001820e+01
   2.4969133e+01  -2.2532269e+01   5.0000000e+01   6.9066283e+00  -4.0312133e+00  -2.0056874e+01
   2.4863703e+01  -2.2447865e+01   5.0000000e+01   6.7249280e+00  -5.4073950e+00  -2.0792152e+01
   2.4754962e+01  -2.2367199e+01   5.0000000e+01   7.8750779e+00  -7.1916481e+00  -2.1841602e+01
   2.4643070e+01  -2.2290385e+01   5.0000000e+01   1.0634976e+01  -9.2741062e+00  -2.1802725e+01
   2.4528186e+01  -2.2217530e+01   5.0000000e+01   1.4098425e+01  -1.0895688e+01  -1.9869331e+01
   2.4410476e+01  -2.2148736e+01   5.0000000e+01   1.7226047e+01  -1.1625132e+01  -1.6549706e+01
   2.4290106e+01  -2.2084099e+01   5.0000000e+01   1.9441237e+01  -1.1446598e+01  -1.2306915e+01
   2.4167247e+01  -2.2023709e+01   5.0000000e+01   1.9872458e+01  -9.9163661e+00  -7.6736954e+00
   2.4042073e+01  -2.1967650e+01   5.0000000e+01   1.7659335e+01  -6.9725609e+00  -4.5237578e+00
   2.3914760e+01  -2.1916000e+01   5.0000000e+01   1.3319285e+01  -3.8128768e+00  -4.8374485e+00
   2.3785486e+01  -2.1868832e+01   5.0000000e+01   8.6549197e+00  -2.3594205e+00  -8.7701932e+00
   2.3654432e+01  -2.1826210e+01   5.0000000e+01   5.1601201e+00  -4.1209293e+00  -1.3902706e+01
   2.3521781e+01  -2.1788195e+01   5.0000000e+01   2.9177268e+00  -8.3919319e+00  -1.7199507e+01
   2.3387718e+01  -2.1754838e+01   5.0000000e+01   1.4819200e+00  -1.3297705e+01  -1.7879593e+01
   2.3252428e+01  -2.1726186e+01   5.0000000e+01   4.7022161e-01  -1.7887937e+01  -1.6352458e+01
   2.3116098e+01  -2.1702278e+01   5.0000000e+01  -7.6631014e-01  -2.1632712e+01  -1.2952095e+01
   2.2978918e+01  -2.1683149e+01   5.0000000e+01  -2.6102945e+00  -2.4130825e+01  -8.3730677e+00
   2.2841078e+01  -2.1668824e+01   5.0000000e+01  -4.7429773e+00  -2.5494142e+01  -3.3855403e+00
   2.2702767e+01  -2.1659323e+01   5.0000000e+01  -6.5602889e+00  -2.6038313e+01   1.6954588e+00
   2.2564176e+01  -2.1654660e+01   5.0000000e+01  -7.7319859e+00  -2.5773435e+01   6.7001271e+00
   2.2425496e+01  -2.1654840e+01   5.0000000e+01  -8.3061241e+00  -2.4700611e+01   1.1043828e+01
   2.2286920e+01  -2.1659864e+01   5.0000000e+01  -8.4570586e+00  -2.3419172e+01   1.4008316e+01
   2.2148637e+01  -2.1669725e+01   5.0000000e+01  -8.3021284e+00  -2.2918535e+01   1.5558673e+01
   2.2010839e+01  -2.1684408e+01   5.0000000e+01  -7.9676780e+00  -2.3663222e+01   1.6437237e+01
   2.1873716e+01  -2.1703895e+01   5.0000000e+01  -7.7447996e+00  -2.5289297e+01   1.7345287e+01
   2.1737458e+01  -2.1728157e+01   5.0000000e+01  -8.0711954e+00  -2.7351771e+01   1.8418199e+01
   2.1602252e+01  -2.1757160e+01   5.0000000e+01  -9.3008450e+00  -2.9976218e+01   1.9927432e+01
   2.1468288e+01  -2.1790866e+01   5.0000000e+01  -1.1460954e+01  -3.3090038e+01   2.3017611e+01
   2.1335749e+01  -2.1829227e+01   5.0000000e+01  -1.4190115e+01  -3.5448342e+01   2.8825421e+01
   2.1204822e+01  -2.1872189e+01   5.0000000e+01  -1.6924974e+01  -3.5041462e+01   3.7033042e+01
   2.1075688e+01  -2.1919694e+01   5.0000000e+01  -1.9273138e+01  -3.0695201e+01   4.5518270e+01
   2.0948528e+01  -2.1971674e+01   5.0000000e+01  -2.1173321e+01  -2.3279723e+01   5.1952863e+01
   2.0823520e+01  -2.2028059e+01   5.0000000e+01  -2.2635023e+01  -1.4794053e+01   5.5535229e+01
   2.0700841e+01  -2.2088768e+01   5.0000000e+01  -2.3612226e+01  -6.8875514e+00   5.6766654e+01
   2.0580663e+01  -2.2153718e+01   5.0000000e+01  -2.4151252e+01  -5.3074706e-01   5.6595990e+01
   2.0463158e+01  -2.2222818e+01   5.0000000e+01  -2.4373940e+01   3.8394786e+00   5.6125654e+01
   2.0348491e+01  -2.2295971e+01   5.0000000e+01  -2.4269880e+01   6.3512400e+00   5.6457012e+01
   2.0236828e+01  -2.2373076e+01   5.0000000e+01  -2.3602279e+01   7.6845402e+00   5.8322365e+01
   2.0128329e+01  -2.2454024e+01   5.0000000e+01  -2.1925489e+01   8.7217703e+00   6.1741473e+01
   2.0023151e+01  -2.2538701e+01   5.0000000e+01  -1.8687013e+01   1.0112010e+01   6.5976484e+01
   1.9921446e+01  -2.2626990e+01   5.0000000e+01  -1.3494177e+01   1.2078833e+01   6.9753755e+01
   1.9823365e+01  -2.2718765e+01   5.0000000e+01  -6.4934513e+00   1.4356564e+01   7.1629335e+01
   1.9729052e+01  -2.2813897e+01   5.0000000e+01   1.4416264e+00   1.6226381e+01   7.0650097e+01
   1.9638647e+01  -2.2912253e+01   5.0000000e+01   9.1102583e+00   1.6937585e+01   6.6942296e+01
   1.9552286e+01  -2.3013693e+01   5.0000000e+01   1.5635675e+01   1.6234206e+01   6.1473052e+01
   1.9470099e+01  -2.3118074e+01   5.0000000e+01   2.0709754e+01   1.4392611e+01   5.5272726e+01
   1.9392212e+01  -2.3225247e+01   5.0000000e+01   2.4401692e+01   1.1844692e+01   4.8937070e+01
   1.9318746e+01  -2.3335061e+01   5.0000000e+01   2.6794937e+01   8.8821607e+00   4.2652108e+01
   1.9249816e+01  -2.3447358e+01   5.0000000e+01   2.7779999e+01   5.6585098e+00   3.6553147e+01
   1.9185531e+01  -2.3561979e+01   5.0000000e+01   2.7172151e+01   2.3176546e+00   3.0996462e+01
   1.9125995e+01  -2.3678760e+01   5.0000000e+01   2.4971917e+01  -9.9676638e-01   2.6560402e+01
   1.9071306e+01  -2.3797532e+01   5.0000000e+01   2.1565384e+01  -4.1947144e+00   2.3920139e+01
   1.9021554e+01  -2.3918126e+01   5.0000000e+01   1.7852796e+01  -7.1552492e+00   2.3612193e+01
   1.8976826e+01  -2.4040367e+01   5.0000000e+01   1.5124312e+01  -9.6698510e+00   2.5541949e+01
   1.8937199e+01  -2.4164080e+01   5.0000000e+01   1.4521441e+01  -1.1671410e+01   2.8706586e+01
   1.8902746e+01  -2.4289084e+01   5.0000000e+01   1.6538848e+01  -1.3423160e+01   3.1518164e+01
   1.8873531e+01  -2.4415198e+01   5.0000000e+01   2.0827005e+01  -1.5380957e+01   3.2265694e+01
   1.8849613e+01  -2.4542239e+01   5.0000000e+01   2.5990465e+01  -1.7922330e+01   2.9625701e+01
   1.8831043e+01  -2.4670020e+01   5.0000000e+01   2.9843664e+01  -2.1160069e+01   2.3654284e+01
   1.8817863e+01  -2.4798355e+01   5.0000000e+01   3.0833049e+01  -2.4859119e+01   1.6147843e+01
   1.8810111e+01  -2.4927055e+01   5.0000000e+01   2.9097189e+01  -2.8584226e+01   9.1773291e+00
   1.8807813e+01  -2.5055931e+01   5.0000000e+01   2.5719047e+01  -3.1987293e+01   3.7573826e+00
   1.8810992e+01  -2.5184791e+01   5.0000000e+01   2.1914107e+01  -3.4857137e+01   1.6524124e-02
   1.8819658e+01  -2.5313444e+01   5.0000000e+01   1.8770779e+01  -3.7042590e+01  -2.6881298e+00
   1.8833818e+01  -2.5441700e+01   5.0000000e+01   1.6574140e+01  -3.8420616e+01  -5.5809939e+00
   1.8853467e+01  -2.5569366e+01   5.0000000e+01   1.4446670e+01  -3.8840903e+01  -9.5000821e+00
   1.8878595e+01  -2.5696251e+01   5.0000000e+01   1.1157871e+01  -3.8143440e+01  -1.4070784e+01
   1.8909179e+01  -2.5822166e+01   5.0000000e+01   6.1758159e+00  -3.6193868e+01  -1.8171299e+01
   1.8945193e+01  -2.5946919e+01   5.0000000e+01  -3.3020393e-01  -3.2946474e+01  -2.0593975e+01
   1.8986599e+01  -2.6070322e+01   5.0000000e+01  -7.6188459e+00  -2.8770015e+01  -2.0169344e+01
   1.9033352e+01  -2.6192188e+01   5.0000000e+01  -1.4412303e+01  -2.4608153e+01  -1.6267301e+01
   1.9085398e+01  -2.6312332e+01   5.0000000e+01  -1.9225522e+01  -2.1552134e+01  -9.3300543e+00
   1.9142673e+01  -2.6430569e+01   5.0000000e+01  -2.0805497e+01  -2.0364762e+01  -1.0036335e+00
   1.9205107e+01  -2.6546718e+01   5.0000000e+01  -1.8978177e+01  -2.1277248e+01   6.1198838e+00
   1.9272619e+01  -2.6660601e+01   5.0000000e+01  -1.5345506e+01  -2.3903380e+01   9.9819535e+00
   1.9345121e+01  -2.6772041e+01   5.0000000e+01  -1.2049394e+01  -2.7576934e+01   1.0534134e+01
   1.9422517e+01  -2.6880867e+01   5.0000000e+01  -1.0048603e+01  -3.1669249e+01   8.9522268e+00
   1.9504699e+01  -2.6986910e+01   5.0000000e+01  -9.0444766e+00  -3.5394415e+01   6.0688601e+00
   1.9591555e+01  -2.7090003e+01   5.0000000e+01  -8.5793167e+00  -3.7706119e+01   2.1456865e+00
   1.9682962e+01  -2.7189986e+01   5.0000000e+01  -8.5950022e+00  -3.7918238e+01  -2.3602425e+00
   1.9778789e+01  -2.7286702e+01   5.0000000e+01  -9.1577359e+00  -3.6072504e+01  -6.7572957e+00
   1.9878898e+01  -2.7379999e+01   5.0000000e+01  -1.0209084e+01  -3.2600711e+01  -1.0316247e+01
   1.9983142e+01  -2.7469729e+01   5.0000000e+01  -1.1424823e+01  -2.8230694e+01  -1.2470572e+01
   2.0091368e+01  -2.7555751e+01   5.0000000e+01  -1.2588696e+01  -2.4001424e+01  -1.3199390e+01
   2.0203413e+01  -2.7637929e+01   5.0000000e+01  -1.3984834e+01  -2.1148073e+01  -1.2954793e+01
   2.0319108e+01  -2.7716131e+01   5.0000000e+01  -1.5871215e+01  -2.0626817e+01  -1.2448658e+01
   2.0438279e+01  -2.7790233e+01   5.0000000e+01  -1.7984959e+01  -2.2535710e+01  -1.2586184e+01
   2.0560741e+01  -2.7860116e+01   5.0000000e+01  -1.9606624e+01  -2.6033205e+01  -1.4206147e+01
   2.1165322e+01  -2.8262981e+01   5.0000000e+01  -6.1903591e+00  -2.3661349e+01  -4.8335641e+01
   2.1302850e+01  -2.8305387e+01   5.0000000e+01  -5.4628768e+00  -1.1931886e+01  -5.4723288e+01
   2.1442164e+01  -2.8343157e+01   5.0000000e+01  -5.5545949e+00  -1.0901899e+00  -5.4275882e+01
   2.1583055e+01  -2.8376234e+01   5.0000000e+01  -4.9188877e+00   5.9760982e+00  -4.9146132e+01
   2.1725317e+01  -2.8404569e+01   5.0000000e+01  -2.7741828e+00   8.9347245e+00  -4.2628605e+01
   2.1868736e+01  -2.8428119e+01   5.0000000e+01   9.3600689e-01   8.6934141e+00  -3.7405696e+01
   2.2013100e+01  -2.8446848e+01   5.0000000e+01   5.9179278e+00   7.0150075e+00  -3.5559116e+01
   2.2158193e+01  -2.8460729e+01   5.0000000e+01   1.1020759e+01   6.7257304e+00  -3.8120202e+01
   2.2303797e+01  -2.8469741e+01   5.0000000e+01   1.3885054e+01   1.1138896e+01  -4.3990773e+01
   2.2449696e+01  -2.8473871e+01   5.0000000e+01   1.1873699e+01   2.2139357e+01  -4.8887694e+01
   2.2595669e+01  -2.8473111e+01   5.0000000e+01   4.4229186e+00   3.6825135e+01  -4.6601506e+01
   2.2741500e+01  -2.8467463e+01   5.0000000e+01  -5.1711322e+00   4.7514089e+01  -3.6232734e+01
   2.2886969e+01  -2.8456936e+01   5.0000000e+01  -1.2553725e+01   5.1913916e+01  -2.4817054e+01
   2.3031858e+01  -2.8441545e+01   5.0000000e+01  -1.6361065e+01   5.5982066e+01  -1.4340582e+01
   2.3175951e+01  -2.8421314e+01   5.0000000e+01  -1.7312290e+01   6.0036578e+01   1.0656046e+00
   2.3319033e+01  -2.8396273e+01   5.0000000e+01  -1.6649972e+01   5.7285852e+01   2.0762366e+01
   2.3460892e+01  -2.8366459e+01   5.0000000e+01  -1.6116005e+01   4.6544428e+01   3.6312290e+01
   2.3601315e+01  -2.8331918e+01   5.0000000e+01  -1.6537552e+01   3.3966658e+01   4.3183527e+01
   2.3740095e+01  -2.8292700e+01   5.0000000e+01  -1.7213746e+01   2.4409593e+01   4.3972377e+01
   2.3877028e+01  -2.8248866e+01   5.0000000e+01  -1.7243843e+01   1.8052416e+01   4.2269021e+01
   2.4011913e+01  -2.8200479e+01   5.0000000e+01  -1.6571573e+01   1.3846782e+01   3.9490684e+01
   2.4144550e+01  -2.8147613e+01   5.0000000e+01  -1.5642810e+01   1.1664869e+01   3.6237312e+01
   2.4274749e+01  -2.8090347e+01   5.0000000e+01  -1.4662317e+01   1.1580541e+01   3.3464026e+01
   2.4402319e+01  -2.8028764e+01   5.0000000e+01  -1.3634900e+01   1.2933087e+01   3.2229531e+01
   2.4527078e+01  -2.7962957e+01   5.0000000e+01  -1.2763815e+01   1.4645158e+01   3.2920369e+01
   2.4648847e+01  -2.7893024e+01   5.0000000e+01  -1.2445899e+01   1.5999046e+01   3.5189238e+01
   2.4767452e+01  -2.7819066e+01   5.0000000e+01  -1.3083218e+01   1.6681692e+01   3.8317004e+01
   2.4882727e+01  -2.7741195e+01   5.0000000e+01  -1.4650916e+01   1.6473644e+01   4.1246344e+01
   2.4994510e+01  -2.7659523e+01   5.0000000e+01  -1.6291734e+01   1.5171219e+01   4.3135237e+01
   2.5102647e+01  -2.7574171e+01   5.0000000e+01  -1.7066576e+01   1.2412719e+01   4.3851805e+01
   2.5206988e+01  -2.7485263e+01   5.0000000e+01  -1.6710812e+01   8.1204766e+00   4.3414667e+01
   2.5307391e+01  -2.7392930e+01   5.0000000e+01  -1.5435882e+01   3.0232938e+00   4.1965920e+01
   2.5403722e+01  -2.7297305e+01   5.0000000e+01  -1.3725808e+01  -1.9934738e+00   3.9959783e+01
   2.5495852e+01  -2.7198528e+01   5.0000000e+01  -1.2124145e+01  -6.4735578e+00   3.7553470e+01
   2.5583660e+01  -2.7096740e+01   5.0000000e+01  -1.0922420e+01  -9.9030686e+00   3.4558943e+01
   2.5667033e+01  -2.6992090e+01   5.0000000e+01  -1.0362767e+01  -1.1574909e+01   3.1152795e+01
   2.5745863e+01  -2.6884727e+01   5.0000000e+01  -1.0910563e+01  -1.1219544e+01   2.7811295e+01
   2.5820052e+01  -2.6774804e+01   5.0000000e+01  -1.3037427e+01  -9.2482818e+00   2.4632280e+01
   2.5889508e+01  -2.6662480e+01   5.0000000e+01  -1.6553003e+01  -6.4860066e+00   2.1155484e+01
   2.5954147e+01  -2.6547913e+01   5.0000000e+01  -2.0488686e+01  -3.9505362e+00   1.6953008e+01
   2.6013892e+01  -2.6431267e+01   5.0000000e+01  -2.3753098e+01  -2.5204178e+00   1.1820429e+01
   2.6068675e+01  -2.6312706e+01   5.0000000e+01  -2.5507304e+01  -2.4988485e+00   5.8600430e+00
   2.6118434e+01  -2.6192397e+01   5.0000000e+01  -2.5392276e+01  -3.7298814e+00  -4.4420821e-01
   2.6163116e+01  -2.6070510e+01   5.0000000e+01  -2.3343455e+01  -5.8789370e+00  -6.4706899e+00
   2.6202673e+01  -2.5947215e+01   5.0000000e+01  -1.9379851e+01  -8.4784105e+00  -1.1352574e+01
   2.6237069e+01  -2.5822683e+01   5.0000000e+01  -1.4076547e+01  -1.0879287e+01  -1.3915995e+01
   2.6266271e+01  -2.5697088e+01   5.0000000e+01  -8.9651120e+00  -1.2552077e+01  -1.3518382e+01
   2.6290256e+01  -2.5570605e+01   5.0000000e+01  -5.5132480e+00  -1.3329833e+01  -1.0929969e+01
   2.6309007e+01  -2.5443407e+01   5.0000000e+01  -3.9112871e+00  -1.3282900e+01  -7.7024977e+00
   2.6322517e+01  -2.5315670e+01   5.0000000e+01  -3.0594481e+00  -1.2581003e+01  -4.9640861e+00
   2.6330782e+01  -2.5187569e+01   5.0000000e+01  -1.5279571e+00  -1.1324953e+01  -2.6144806e+00
   2.6333808e+01  -2.5059280e+01   5.0000000e+01   1.2956675e+00  -9.5257751e+00   4.3768814e-01
   2.6331608e+01  -2.4930976e+01   5.0000000e+01   4.7959984e+00  -7.4616810e+00   5.5374868e+00
   2.6324201e+01  -2.4802834e+01   5.0000000e+01   7.1526204e+00  -5.5924792e+00   1.3280983e+01
   2.6311613e+01  -2.4675025e+01   5.0000000e+01   6.3799032e+00  -4.0003681e+00   2.2746333e+01
   2.6293876e+01  -2.4547724e+01   5.0000000e+01   1.2133796e+00  -2.3641419e+00   3.1850743e+01
   2.6271031e+01  -2.4421101e+01   5.0000000e+01  -8.3360350e+00  -3.4861464e-01   3.7525314e+01
   2.6243123e+01  -2.4295326e+01   5.0000000e+01  -2.0018508e+01   1.9498056e+00   3.7046605e+01
   2.6210204e+01  -2.4170568e+01   5.0000000e+01  -3.0484605e+01   4.0733563e+00   3.0219177e+01
   2.6172332e+01  -2.4046993e+01   5.0000000e+01  -3.7691406e+01   5.6002085e+00   1.9080263e+01
   2.6129572e+01  -2.3924766e+01   5.0000000e+01  -4.1439137e+01   6.4763378e+00   5.6702842e+00
   2.6081993e+01  -2.3804049e+01   5.0000000e+01  -4.1320963e+01   6.8489171e+00  -9.1789486e+00
   2.6029673e+01  -2.3685003e+01   5.0000000e+01  -3.5745466e+01   6.4860984e+00  -2.3653517e+01
   2.5972691e+01  -2.3567783e+01   5.0000000e+01  -2.5044760e+01   5.2761258e+00  -3.3980347e+01
   2.5911136e+01  -2.3452546e+01   5.0000000e+01  -1.2692033e+01   3.7511275e+00  -3.7827002e+01
   2.5845100e+01  -2.3339442e+01   5.0000000e+01  -2.4743718e+00   2.5786979e+00  -3.6209327e+01
   2.5774679e+01  -2.3228620e+01   5.0000000e+01   4.0026261e+00   1.9455348e+00  -3.2209716e+01
   2.5699977e+01  -2.3120225e+01   5.0000000e+01   7.6660044e+00   1.5268617e+00  -2.8249335e+01
   2.5621100e+01  -2.3014399e+01   5.0000000e+01   9.8521581e+00   1.2369216e+00  -2.4690380e+01
   2.5538160e+01  -2.2911279e+01   5.0000000e+01   1.0895876e+01   1.3557911e+00  -2.1456008e+01
   2.5451275e+01  -2.2810999e+01   5.0000000e+01   1.0936573e+01   1.8060117e+00  -1.9037844e+01
   2.5360563e+01  -2.2713691e+01   5.0000000e+01   1.0361482e+01   2.0532672e+00  -1.7801145e+01
   2.5266151e+01  -2.2619479e+01   5.0000000e+01   9.6078959e+00   1.6480412e+00  -1.7618471e+01
   2.5168167e+01  -2.2528487e+01   5.0000000e+01   9.0083077e+00   5.8748545e-01  -1.8044289e+01
   2.5066744e+01  -2.2440831e+01   5.0000000e+01   8.7232770e+00  -7.7911737e-01  -1.8853671e+01
   2.4962018e+01  -2.2356625e+01   5.0000000e+01   9.2124200e+00  -2.4124723e+00  -2.0126305e+01
   2.4854130e+01  -2.2275976e+01   5.0000000e+01   1.1177218e+01  -4.6969159e+00  -2.1109807e+01
   2.4743223e+01  -2.2198990e+01   5.0000000e+01   1.4436406e+01  -7.5083163e+00  -2.0259555e+01
   2.4629442e+01  -2.2125764e+01   5.0000000e+01   1.7880277e+01  -9.9508445e+00  -1.6981723e+01
   2.4512939e+01  -2.2056393e+01   5.0000000e+01   2.0643239e+01  -1.1303213e+01  -1.2096105e+01
   2.4393864e+01  -2.1990966e+01   5.0000000e+01   2.2316092e+01  -1.1466084e+01  -6.3586228e+00
   2.4272374e+01  -2.1929566e+01   5.0000000e+01   2.2088717e+01  -9.9837539e+00  -3.6999448e-01
   2.4148626e+01  -2.1872271e+01   5.0000000e+01   1.9367046e+01  -6.4827289e+00   3.7372044e+00
   2.4022779e+01  -2.1819156e+01   5.0000000e+01   1.5149718e+01  -2.1401708e+00   3.6771124e+00
   2.3894996e+01  -2.1770288e+01   5.0000000e+01   1.1129171e+01   1.0128392e+00  -6.0020092e-01
   2.3765441e+01  -2.1725729e+01   5.0000000e+01   8.2481629e+00   1.2219749e+00  -7.0797084e+00
   2.3634279e+01  -2.1685536e+01   5.0000000e+01   6.4293350e+00  -1.8963861e+00  -1.2851321e+01
   2.3501680e+01  -2.1649760e+01   5.0000000e+01   5.2397339e+00  -6.9623784e+00  -1.5974471e+01
   2.3367810e+01  -2.1618447e+01   5.0000000e+01   4.3677823e+00  -1.2248579e+01  -1.6111185e+01
   2.3232841e+01  -2.1591636e+01   5.0000000e+01   3.2548306e+00  -1.6608376e+01  -1.3857815e+01
   2.3096944e+01  -2.1569362e+01   5.0000000e+01   1.3322606e+00  -1.9621479e+01  -1.0315220e+01
   2.2960291e+01  -2.1551654e+01   5.0000000e+01  -1.3909760e+00  -2.1576420e+01  -6.4669677e+00
   2.2823057e+01  -2.1538532e+01   5.0000000e+01  -4.3819535e+00  -2.3018493e+01  -2.5783660e+00
   2.2685413e+01  -2.1530015e+01   5.0000000e+01  -7.1235152e+00  -2.4039812e+01   1.6441764e+00
   2.2547535e+01  -2.1526113e+01   5.0000000e+01  -9.4432576e+00  -2.4217259e+01   6.1361487e+00
   2.2409597e+01  -2.1526832e+01   5.0000000e+01  -1.1365701e+01  -2.3430036e+01   1.0087054e+01
   2.2271773e+01  -2.1532169e+01   5.0000000e+01  -1.2843897e+01  -2.2432211e+01   1.2709857e+01
   2.2134238e+01  -2.1542118e+01   5.0000000e+01  -1.3722023e+01  -2.2263557e+01   1.4184771e+01
   2.1997165e+01  -2.1556667e+01   5.0000000e+01  -1.3950891e+01  -2.3171215e+01   1.5398673e+01
   2.1860729e+01  -2.1575798e+01   5.0000000e+01  -1.3749160e+01  -2.4561925e+01   1.6828449e+01
   2.1725102e+01  -2.1599485e+01   5.0000000e+01  -1.3525454e+01  -2.6028801e+01   1.8214513e+01
   2.1590456e+01  -2.1627699e+01   5.0000000e+01  -1.3720715e+01  -2.7896011e+01   1.9578914e+01
   2.1456963e+01  -2.1660403e+01   5.0000000e+01  -1.4667784e+01  -3.0290239e+01   2.1972791e+01
   2.1324792e+01  -2.1697557e+01   5.0000000e+01  -1.6380752e+01  -3.2182535e+01   2.6638995e+01
   2.1194112e+01  -2.1739113e+01   5.0000000e+01  -1.8466752e+01  -3.1681337e+01   3.3574819e+01
   2.1065091e+01  -2.1785018e+01   5.0000000e+01  -2.0403414e+01  -2.7526997e+01   4.0869172e+01
   2.0937892e+01  -2.1835213e+01   5.0000000e+01  -2.1914978e+01  -2.0492279e+01   4.6118511e+01
   2.0812680e+01  -2.1889635e+01   5.0000000e+01  -2.2994532e+01  -1.2554238e+01   4.8437580e+01
   2.0689616e+01  -2.1948213e+01   5.0000000e+01  -2.3724964e+01  -5.2418250e+00   4.8407408e+01
   2.0568860e+01  -2.2010874e+01   5.0000000e+01  -2.4239059e+01   7.2032658e-01   4.7028712e+01
   2.0450568e+01  -2.2077536e+01   5.0000000e+01  -2.4758549e+01   5.0349994e+00   4.5302171e+01
   2.0334895e+01  -2.2148115e+01   5.0000000e+01  -2.5400869e+01   7.7227088e+00   4.4299667e+01
   2.0221992e+01  -2.2222520e+01   5.0000000e+01  -2.5994219e+01   9.3187113e+00   4.4860178e+01
   2.0112007e+01  -2.2300655e+01   5.0000000e+01  -2.6198566e+01   1.0606272e+01   4.7153357e+01
   2.0005087e+01  -2.2382421e+01   5.0000000e+01  -2.5554515e+01   1.2109617e+01   5.0803941e+01
   1.9901373e+01  -2.2467711e+01   5.0000000e+01  -2.3444706e+01   1.4002922e+01   5.5135774e+01
   1.9801004e+01  -2.2556416e+01   5.0000000e+01  -1.9354864e+01   1.6244882e+01   5.9133965e+01
   1.9704116e+01  -2.2648422e+01   5.0000000e+01  -1.3349009e+01   1.8488317e+01   6.1582376e+01
   1.9610841e+01  -2.2743609e+01   5.0000000e+01  -6.2064705e+00   2.0068396e+01   6.1701284e+01
   1.9521305e+01  -2.2841855e+01   5.0000000e+01   1.0205714e+00   2.0424300e+01   5.9609056e+01
   1.9435633e+01  -2.2943031e+01   5.0000000e+01   7.5550086e+00   1.9495155e+01   5.5993893e+01
   1.9353944e+01  -2.3047007e+01   5.0000000e+01   1.3021697e+01   1.7601887e+01   5.1523693e+01
   1.9276353e+01  -2.3153647e+01   5.0000000e+01   1.7319634e+01   1.5102955e+01   4.6622888e+01
   1.9202970e+01  -2.3262812e+01   5.0000000e+01   2.0453479e+01   1.2218783e+01   4.1507508e+01
   1.9133901e+01  -2.3374359e+01   5.0000000e+01   2.2375985e+01   9.0962120e+00   3.6320720e+01
   1.9069247e+01  -2.3488141e+01   5.0000000e+01   2.2920651e+01   5.8981973e+00   3.1275436e+01
   1.9009104e+01  -2.3604011e+01   5.0000000e+01   2.1914277e+01   2.7563758e+00   2.6810679e+01
   1.8953562e+01  -2.3721815e+01   5.0000000e+01   1.9446642e+01  -2.5228127e-01   2.3654486e+01
   1.8902707e+01  -2.3841398e+01   5.0000000e+01   1.6159255e+01  -2.9792918e+00   2.2583362e+01
   1.8856619e+01  -2.3962601e+01   5.0000000e+01   1.3200133e+01  -5.1737191e+00   2.3808758e+01
   1.8815371e+01  -2.4085264e+01   5.0000000e+01   1.1690917e+01  -6.7553623e+00   2.6667744e+01
   1.8779032e+01  -2.4209225e+01   5.0000000e+01   1.2268814e+01  -8.0004322e+00   2.9954788e+01
   1.8747664e+01  -2.4334317e+01   5.0000000e+01   1.4985769e+01  -9.4245877e+00   3.2325898e+01
   1.8721324e+01  -2.4460373e+01   5.0000000e+01   1.9224905e+01  -1.1569077e+01   3.2488380e+01
   1.8700062e+01  -2.4587226e+01   5.0000000e+01   2.3535096e+01  -1.4747857e+01   2.9696174e+01
   1.8683922e+01  -2.4714703e+01   5.0000000e+01   2.6179772e+01  -1.8769040e+01   2.4518551e+01
   1.8672941e+01  -2.4842634e+01   5.0000000e+01   2.6340811e+01  -2.3037036e+01   1.8592014e+01
   1.8667150e+01  -2.4970845e+01   5.0000000e+01   2.4416746e+01  -2.7042685e+01   1.3386911e+01
   1.8666572e+01  -2.5099163e+01   5.0000000e+01   2.1368137e+01  -3.0586151e+01   9.6452276e+00
   1.8671226e+01  -2.5227412e+01   5.0000000e+01   1.8355075e+01  -3.3607181e+01   7.3645156e+00
   1.8681121e+01  -2.5355419e+01   5.0000000e+01   1.6269657e+01  -3.6054853e+01   5.6948027e+00
   1.8696260e+01  -2.5483007e+01   5.0000000e+01   1.5082696e+01  -3.7811493e+01   3.3648235e+00
   1.8716639e+01  -2.5610002e+01   5.0000000e+01   1.3757564e+01  -3.8607731e+01  -3.2858224e-01
   1.8742248e+01  -2.5736228e+01   5.0000000e+01   1.1164640e+01  -3.8161172e+01  -4.8808867e+00
   1.8773067e+01  -2.5861510e+01   5.0000000e+01   6.9189811e+00  -3.6396482e+01  -9.2265698e+00
   1.8809070e+01  -2.5985676e+01   5.0000000e+01   1.1724391e+00  -3.3377011e+01  -1.2348241e+01
   1.8850225e+01  -2.6108553e+01   5.0000000e+01  -5.5440335e+00  -2.9305613e+01  -1.3171841e+01
   1.8896490e+01  -2.6229968e+01   5.0000000e+01  -1.2164438e+01  -2.4793129e+01  -1.0818754e+01
   1.8947817e+01  -2.6349751e+01   5.0000000e+01  -1.7223627e+01  -2.0895792e+01  -5.3167746e+00
   1.9004149e+01  -2.6467735e+01   5.0000000e+01  -1.9421253e+01  -1.8710852e+01   1.9450115e+00
   1.9065423e+01  -2.6583752e+01   5.0000000e+01  -1.8570179e+01  -1.8825447e+01   8.5290414e+00
   1.9131567e+01  -2.6697639e+01   5.0000000e+01  -1.6130136e+01  -2.1002894e+01   1.2531742e+01
   1.9202504e+01  -2.6809234e+01   5.0000000e+01  -1.3901868e+01  -2.4472438e+01   1.3988641e+01
   1.9278145e+01  -2.6918377e+01   5.0000000e+01  -1.2458157e+01  -2.8525663e+01   1.4051018e+01
   1.9358398e+01  -2.7024914e+01   5.0000000e+01  -1.1217190e+01  -3.2673768e+01   1.3232962e+01
   1.9443161e+01  -2.7128690e+01   5.0000000e+01  -9.7269729e+00  -3.6177137e+01   1.0945852e+01
   1.9532325e+01  -2.7229558e+01   5.0000000e+01  -8.4011989e+00  -3.8016891e+01   6.9254126e+00
   1.9625774e+01  -2.7327370e+01   5.0000000e+01  -7.7695790e+00  -3.7708178e+01   1.9636389e+00
   1.9723385e+01  -2.7421987e+01   5.0000000e+01  -7.9330662e+00  -3.5449680e+01  -2.9076153e+00
   1.9825027e+01  -2.7513269e+01   5.0000000e+01  -8.6237980e+00  -3.1772494e+01  -6.9752205e+00
   1.9930563e+01  -2.7601086e+01   5.0000000e+01  -9.6366053e+00  -2.7280822e+01  -1.0067421e+01
   2.0039849e+01  -2.7685307e+01   5.0000000e+01  -1.1420116e+01  -2.2663056e+01  -1.1901541e+01
   2.0152735e+01  -2.7765810e+01   5.0000000e+01  -1.4337315e+01  -1.9195380e+01  -1.1777296e+01
   2.0269062e+01  -2.7842477e+01   5.0000000e+01  -1.7915217e+01  -1.8262089e+01  -9.8332206e+00
   2.0388669e+01  -2.7915196e+01   5.0000000e+01  -2.1247227e+01  -2.0389412e+01  -7.2483128e+00
   2.0511386e+01  -2.7983857e+01   5.0000000e+01  -2.3109988e+01  -2.5147545e+01  -5.7465731e+00
   2.0637038e+01  -2.8048361e+01   5.0000000e+01  -2.2391294e+01  -3.0990091e+01  -7.3952990e+00
   2.0765445e+01  -2.8108612e+01   5.0000000e+01  -1.8910869e+01  -3.5486334e+01  -1.3557547e+01
   2.0896422e+01  -2.8164520e+01   5.0000000e+01  -1.3765040e+01  -3.6379377e+01  -2.3996637e+01
   2.1029779e+01  -2.8216002e+01   5.0000000e+01  -8.9859400e+00  -3.2437100e+01  -3.6750666e+01
   2.1696587e+01  -2.8530550e+01   5.0000000e+01  -9.5554683e+00   3.6344957e+00  -4.5708702e+01
   2.1840388e+01  -2.8554221e+01   5.0000000e+01  -4.2628966e+00   2.9724286e+00  -4.1211359e+01
   2.1985113e+01  -2.8573223e+01   5.0000000e+01   2.2254669e+00   8.4037720e-01  -4.0874721e+01
   2.2130560e+01  -2.8587531e+01   5.0000000e+01   8.7117430e+00   1.1382292e+00  -4.5756484e+01
   2.2276525e+01  -2.8597124e+01   5.0000000e+01   1.2365148e+01   8.5203697e+00  -5.3345564e+01
   2.2422804e+01  -2.8601989e+01   5.0000000e+01   9.9831239e+00   2.4732998e+01  -5.6876352e+01
   2.2569191e+01  -2.8602118e+01   5.0000000e+01   1.4672990e+00   4.4274831e+01  -4.8952096e+01
   2.2715481e+01  -2.8597512e+01   5.0000000e+01  -9.0201546e+00   5.6313080e+01  -3.1078373e+01
   2.2861468e+01  -2.8588178e+01   5.0000000e+01  -1.7158849e+01   5.8183130e+01  -1.4610624e+01
   2.3006949e+01  -2.8574127e+01   5.0000000e+01  -2.1471851e+01   5.8296804e+01  -3.5883299e+00
   2.3151719e+01  -2.8555381e+01   5.0000000e+01  -2.1679183e+01   5.9361049e+01   8.6722772e+00
   2.3295575e+01  -2.8531965e+01   5.0000000e+01  -1.8482030e+01   5.5938978e+01   2.3847040e+01
   2.3438319e+01  -2.8503913e+01   5.0000000e+01  -1.4660929e+01   4.6336230e+01   3.6572035e+01
   2.3579750e+01  -2.8471263e+01   5.0000000e+01  -1.2615824e+01   3.4464827e+01   4.3084629e+01
   2.3719672e+01  -2.8434062e+01   5.0000000e+01  -1.2213441e+01   2.4278121e+01   4.4198035e+01
   2.3857891e+01  -2.8392362e+01   5.0000000e+01  -1.2256741e+01   1.6775051e+01   4.2312536e+01
   2.3994218e+01  -2.8346222e+01   5.0000000e+01  -1.2049138e+01   1.1636637e+01   3.8824532e+01
   2.4128466e+01  -2.8295705e+01   5.0000000e+01  -1.1490978e+01   8.8660056e+00   3.4649987e+01
   2.4260450e+01  -2.8240882e+01   5.0000000e+01  -1.0813665e+01   8.4682013e+00   3.0947685e+01
   2.4389991e+01  -2.8181830e+01   5.0000000e+01  -1.0220080e+01   9.7631700e+00   2.8756725e+01
   2.4516915e+01  -2.8118631e+01   5.0000000e+01  -9.6624615e+00   1.1630116e+01   2.8500542e+01
   2.4641050e+01  -2.8051372e+01   5.0000000e+01  -9.0584044e+00   1.3151273e+01   3.0060033e+01
   2.4762232e+01  -2.7980147e+01   5.0000000e+01  -8.4766819e+00   1.3923986e+01   3.3081460e+01
   2.4880300e+01  -2.7905054e+01   5.0000000e+01  -8.3819601e+00   1.3792586e+01   3.7169571e+01
   2.4995099e+01  -2.7826197e+01   5.0000000e+01  -9.3970047e+00   1.2511070e+01   4.1341937e+01
   2.5106478e+01  -2.7743684e+01   5.0000000e+01  -1.1451630e+01   9.8789121e+00   4.4142711e+01
   2.5214294e+01  -2.7657628e+01   5.0000000e+01  -1.3699567e+01   5.8141202e+00   4.4459054e+01
   2.5318409e+01  -2.7568147e+01   5.0000000e+01  -1.5093364e+01   6.8233171e-01   4.2008768e+01
   2.5418691e+01  -2.7475363e+01   5.0000000e+01  -1.4972857e+01  -4.6906059e+00   3.7613176e+01
   2.5515015e+01  -2.7379402e+01   5.0000000e+01  -1.3546955e+01  -9.6381114e+00   3.2596864e+01
   2.5607260e+01  -2.7280395e+01   5.0000000e+01  -1.1550550e+01  -1.3721510e+01   2.7566781e+01
   2.5695315e+01  -2.7178474e+01   5.0000000e+01  -9.4101689e+00  -1.6132922e+01   2.2680031e+01
   2.5779072e+01  -2.7073779e+01   5.0000000e+01  -7.5172777e+00  -1.6041326e+01   1.8649907e+01
   2.5858433e+01  -2.6966448e+01   5.0000000e+01  -6.6769273e+00  -1.3418747e+01   1.6326803e+01
   2.5933304e+01  -2.6856627e+01   5.0000000e+01  -7.7961277e+00  -9.1975194e+00   1.5871410e+01
   2.6003599e+01  -2.6744461e+01   5.0000000e+01  -1.1194466e+01  -4.8143697e+00   1.6339942e+01
   2.6069240e+01  -2.6630099e+01   5.0000000e+01  -1.6183428e+01  -1.4437123e+00   1.6156281e+01
   2.6130153e+01  -2.6513695e+01   5.0000000e+01  -2.1460616e+01   4.3741852e-01   1.4025115e+01
   2.6186274e+01  -2.6395400e+01   5.0000000e+01  -2.5683894e+01   9.6833414e-01   9.5992428e+00
   2.6237544e+01  -2.6275372e+01   5.0000000e+01  -2.8011589e+01   4.5059463e-01   3.4793198e+00
   2.6283911e+01  -2.6153767e+01   5.0000000e+01  -2.8183040e+01  -9.1505797e-01  -3.4960490e+00
   2.6325330e+01  -2.6030745e+01   5.0000000e+01  -2.6000941e+01  -2.9402290e+00  -1.0579222e+01
   2.6361764e+01  -2.5906467e+01   5.0000000e+01  -2.1292257e+01  -5.1740844e+00  -1.6466178e+01
   2.6393181e+01  -2.5781093e+01   5.0000000e+01  -1.5078617e+01  -7.0844606e+00  -1.9354878e+01
   2.6419557e+01  -2.5654786e+01   5.0000000e+01  -9.4761777e+00  -8.5210303e+00  -1.8751269e+01
   2.6440874e+01  -2.5527710e+01   5.0000000e+01  -5.8397480e+00  -9.6043873e+00  -1.5898402e+01
   2.6457122e+01  -2.5400027e+01   5.0000000e+01  -3.9638455e+00  -1.0487790e+01  -1.2518841e+01
   2.6468295e+01  -2.5271901e+01   5.0000000e+01  -2.4034102e+00  -1.1204378e+01  -9.5556429e+00
   2.6474395e+01  -2.5143497e+01   5.0000000e+01   2.0558570e-01  -1.1520358e+01  -6.4197424e+00
   2.6475432e+01  -2.5014978e+01   5.0000000e+01   3.7787586e+00  -1.1248520e+01  -1.7817560e+00
   2.6471419e+01  -2.4886507e+01   5.0000000e+01   6.9141145e+00  -1.0655505e+01   5.1196245e+00
   2.6462377e+01  -2.4758246e+01   5.0000000e+01   7.8440943e+00  -1.0178887e+01   1.3961775e+01
   2.6448333e+01  -2.4630359e+01   5.0000000e+01   5.2369138e+00  -9.9323700e+00   2.3496473e+01
   2.6429320e+01  -2.4503005e+01   5.0000000e+01  -1.5701373e+00  -9.5345453e+00   3.1710996e+01
   2.6405378e+01  -2.4376344e+01   5.0000000e+01  -1.1999066e+01  -8.3404628e+00   3.5811594e+01
   2.6376549e+01  -2.4250535e+01   5.0000000e+01  -2.3528257e+01  -6.1030589e+00   3.3675377e+01
   2.6342885e+01  -2.4125735e+01   5.0000000e+01  -3.3097996e+01  -3.1897793e+00   2.5714681e+01
   2.6304441e+01  -2.4002099e+01   5.0000000e+01  -3.9193769e+01  -1.4260160e-01   1.4074848e+01
   2.6261278e+01  -2.3879780e+01   5.0000000e+01  -4.1725354e+01   2.5985639e+00   4.6573828e-01
   2.6213463e+01  -2.3758931e+01   5.0000000e+01  -4.0102569e+01   4.6031206e+00  -1.4192569e+01
   2.6161066e+01  -2.3639699e+01   5.0000000e+01  -3.3033422e+01   5.3755308e+00  -2.7661131e+01
   2.6104165e+01  -2.3522232e+01   5.0000000e+01  -2.1419072e+01   4.9669222e+00  -3.6257453e+01
   2.6042840e+01  -2.3406674e+01   5.0000000e+01  -9.0118843e+00   4.1085612e+00  -3.8236294e+01
   2.5977179e+01  -2.3293167e+01   5.0000000e+01   5.4915260e-01   3.4085287e+00  -3.5230643e+01
   2.5907270e+01  -2.3181849e+01   5.0000000e+01   6.2054352e+00   3.0605013e+00  -3.0589911e+01
   2.5833210e+01  -2.3072856e+01   5.0000000e+01   9.4312378e+00   2.8905597e+00  -2.6514012e+01
   2.5755099e+01  -2.2966321e+01   5.0000000e+01   1.1634119e+01   2.7893293e+00  -2.2815530e+01
   2.5673039e+01  -2.2862374e+01   5.0000000e+01   1.2765638e+01   2.9368074e+00  -1.9046230e+01
   2.5587139e+01  -2.2761140e+01   5.0000000e+01   1.2669661e+01   3.3765633e+00  -1.5768631e+01
   2.5497509e+01  -2.2662741e+01   5.0000000e+01   1.1764502e+01   3.8696831e+00  -1.3727488e+01
   2.5404267e+01  -2.2567298e+01   5.0000000e+01   1.0692459e+01   3.9718461e+00  -1.3185376e+01
   2.5307530e+01  -2.2474924e+01   5.0000000e+01   1.0022701e+01   3.3713478e+00  -1.3730230e+01
   2.5207421e+01  -2.2385731e+01   5.0000000e+01   9.9771329e+00   2.2055828e+00  -1.4746044e+01
   2.5104067e+01  -2.2299826e+01   5.0000000e+01   1.0704786e+01   6.6291940e-01  -1.5998728e+01
   2.4997595e+01  -2.2217313e+01   5.0000000e+01   1.2545501e+01  -1.5547976e+00  -1.7012439e+01
   2.4888140e+01  -2.2138290e+01   5.0000000e+01   1.5316904e+01  -4.6551434e+00  -1.6580347e+01
   2.4775834e+01  -2.2062851e+01   5.0000000e+01   1.8130275e+01  -8.0854323e+00  -1.3886273e+01
   2.4660818e+01  -2.1991088e+01   5.0000000e+01   2.0234741e+01  -1.0885962e+01  -9.1822058e+00
   2.4543230e+01  -2.1923085e+01   5.0000000e+01   2.1305161e+01  -1.2388439e+01  -3.2620225e+00
   2.4423215e+01  -2.1858924e+01   5.0000000e+01   2.0883203e+01  -1.2156426e+01   3.1237309e+00
   2.4300916e+01  -2.1798682e+01   5.0000000e+01   1.8411153e+01  -9.6286063e+00   8.3881063e+00
   2.4176483e+01  -2.1742429e+01   5.0000000e+01   1.4655119e+01  -5.2697478e+00   1.0234367e+01
   2.4050064e+01  -2.1690233e+01   5.0000000e+01   1.1278958e+01  -6.5832393e-01   8.0186126e+00
   2.3921812e+01  -2.1642156e+01   5.0000000e+01   8.9994570e+00   2.5773764e+00   2.6749597e+00
   2.3791878e+01  -2.1598255e+01   5.0000000e+01   7.7121726e+00   2.9675764e+00  -4.1439188e+00
   2.3660419e+01  -2.1558582e+01   5.0000000e+01   7.1050449e+00   1.1187732e-01  -1.0163840e+01
   2.3527589e+01  -2.1523184e+01   5.0000000e+01   6.8259708e+00  -4.8579829e+00  -1.3492824e+01
   2.3393548e+01  -2.1492103e+01   5.0000000e+01   6.4004950e+00  -1.0043317e+01  -1.3541889e+01
   2.3258453e+01  -2.1465376e+01   5.0000000e+01   5.1847874e+00  -1.3948699e+01  -1.1266912e+01
   2.3122465e+01  -2.1443035e+01   5.0000000e+01   2.8093752e+00  -1.6317116e+01  -8.2885472e+00
   2.2985743e+01  -2.1425105e+01   5.0000000e+01  -4.8979116e-01  -1.7896402e+01  -5.6085153e+00
   2.2848449e+01  -2.1411609e+01   5.0000000e+01  -4.1141320e+00  -1.9441768e+01  -3.0658076e+00
   2.2710745e+01  -2.1402561e+01   5.0000000e+01  -7.6615377e+00  -2.0872172e+01  -1.6822068e-02
   2.2572793e+01  -2.1397974e+01   5.0000000e+01  -1.1047355e+01  -2.1518740e+01   3.5391637e+00
   2.2434756e+01  -2.1397852e+01   5.0000000e+01  -1.4217362e+01  -2.1123548e+01   6.7054617e+00
   2.2296795e+01  -2.1402195e+01   5.0000000e+01  -1.6925386e+01  -2.0458351e+01   8.6262658e+00
   2.2159073e+01  -2.1410999e+01   5.0000000e+01  -1.8840342e+01  -2.0640072e+01   9.5729173e+00
   2.2021753e+01  -2.1424252e+01   5.0000000e+01  -1.9809861e+01  -2.1924074e+01   1.0624272e+01
   2.1884995e+01  -2.1441940e+01   5.0000000e+01  -1.9916233e+01  -2.3601524e+01   1.2370426e+01
   2.1748963e+01  -2.1464041e+01   5.0000000e+01  -1.9403235e+01  -2.5065341e+01   1.4420927e+01
   2.1613815e+01  -2.1490528e+01   5.0000000e+01  -1.8655678e+01  -2.6520700e+01   1.6359572e+01
   2.1479712e+01  -2.1521372e+01   5.0000000e+01  -1.8176171e+01  -2.8284337e+01   1.8691170e+01
   2.1346812e+01  -2.1556535e+01   5.0000000e+01  -1.8398508e+01  -2.9791244e+01   2.2429104e+01
   2.1215274e+01  -2.1595975e+01   5.0000000e+01  -1.9407832e+01  -2.9560453e+01   2.7970688e+01
   2.1085253e+01  -2.1639647e+01   5.0000000e+01  -2.0822071e+01  -2.6226250e+01   3.4174747e+01
   2.0956904e+01  -2.1687497e+01   5.0000000e+01  -2.2082360e+01  -2.0063817e+01   3.8928760e+01
   2.0830381e+01  -2.1739469e+01   5.0000000e+01  -2.2849279e+01  -1.2807558e+01   4.1068455e+01
   2.0705835e+01  -2.1795501e+01   5.0000000e+01  -2.3089036e+01  -6.0237449e+00   4.0874319e+01
   2.0583416e+01  -2.1855528e+01   5.0000000e+01  -2.2947050e+01  -4.2910364e-01   3.9217469e+01
   2.0463272e+01  -2.1919476e+01   5.0000000e+01  -2.2723969e+01   3.8595187e+00   3.6885472e+01
   2.0345548e+01  -2.1987271e+01   5.0000000e+01  -2.2862848e+01   6.8393606e+00   3.4627157e+01
   2.0230387e+01  -2.2058831e+01   5.0000000e+01  -2.3564944e+01   8.7445720e+00   3.3395010e+01
   2.0117930e+01  -2.2134070e+01   5.0000000e+01  -2.4588553e+01   1.0233559e+01   3.3750261e+01
   2.0008315e+01  -2.2212900e+01   5.0000000e+01  -2.5534053e+01   1.1853492e+01   3.5544208e+01
   1.9901677e+01  -2.2295225e+01   5.0000000e+01  -2.5969751e+01   1.3704626e+01   3.8450255e+01
   1.9798149e+01  -2.2380947e+01   5.0000000e+01  -2.5272579e+01   1.5735987e+01   4.2202335e+01
   1.9697859e+01  -2.2469962e+01   5.0000000e+01  -2.2792258e+01   1.7933191e+01   4.6158976e+01
   1.9600935e+01  -2.2562165e+01   5.0000000e+01  -1.8382127e+01   2.0050953e+01   4.9272472e+01
   1.9507498e+01  -2.2657444e+01   5.0000000e+01  -1.2598896e+01   2.1560693e+01   5.0756656e+01
   1.9417668e+01  -2.2755684e+01   5.0000000e+01  -6.3099154e+00   2.2019454e+01   5.0542861e+01
   1.9331561e+01  -2.2856766e+01   5.0000000e+01  -1.9092882e-01   2.1379711e+01   4.9000286e+01
   1.9249288e+01  -2.2960568e+01   5.0000000e+01   5.3514371e+00   1.9874607e+01   4.6472321e+01
   1.9170958e+01  -2.3066965e+01   5.0000000e+01   1.0055378e+01   1.7753412e+01   4.3205141e+01
   1.9096674e+01  -2.3175827e+01   5.0000000e+01   1.3781098e+01   1.5160799e+01   3.9450576e+01
   1.9026536e+01  -2.3287021e+01   5.0000000e+01   1.6514606e+01   1.2222366e+01   3.5439882e+01
   1.8960640e+01  -2.3400412e+01   5.0000000e+01   1.8190761e+01   9.1105800e+00   3.1296491e+01
   1.8899076e+01  -2.3515861e+01   5.0000000e+01   1.8567524e+01   5.9786282e+00   2.7242916e+01
   1.8841930e+01  -2.3633227e+01   5.0000000e+01   1.7447363e+01   2.9548196e+00   2.3871976e+01
   1.8789285e+01  -2.3752366e+01   5.0000000e+01   1.5102048e+01   2.5978128e-01   2.2034642e+01
   1.8741217e+01  -2.3873132e+01   5.0000000e+01   1.2403893e+01  -1.7825239e+00   2.2215353e+01
   1.8697798e+01  -2.3995374e+01   5.0000000e+01   1.0379858e+01  -3.0304762e+00   2.4123126e+01
   1.8659095e+01  -2.4118942e+01   5.0000000e+01   9.7466681e+00  -3.7070491e+00   2.6934404e+01
   1.8625168e+01  -2.4243682e+01   5.0000000e+01   1.0785772e+01  -4.3149398e+00   2.9671530e+01
   1.8596073e+01  -2.4369440e+01   5.0000000e+01   1.3349924e+01  -5.4685633e+00   3.1364518e+01
   1.8571862e+01  -2.4496058e+01   5.0000000e+01   1.6766689e+01  -7.7226783e+00   3.1218339e+01
   1.8552579e+01  -2.4623378e+01   5.0000000e+01   1.9902404e+01  -1.1250993e+01   2.8999894e+01
   1.8538262e+01  -2.4751241e+01   5.0000000e+01   2.1647608e+01  -1.5619396e+01   2.5303410e+01
   1.8528946e+01  -2.4879485e+01   5.0000000e+01   2.1530945e+01  -2.0100060e+01   2.1254108e+01
   1.8524657e+01  -2.5007949e+01   5.0000000e+01   1.9815785e+01  -2.4186204e+01   1.7909561e+01
   1.8525417e+01  -2.5136470e+01   5.0000000e+01   1.7337741e+01  -2.7708959e+01   1.5915364e+01
   1.8531240e+01  -2.5264884e+01   5.0000000e+01   1.5223070e+01  -3.0646532e+01   1.5124879e+01
   1.8542136e+01  -2.5393029e+01   5.0000000e+01   1.4186540e+01  -3.3001095e+01   1.4546193e+01
   1.8558106e+01  -2.5520741e+01   5.0000000e+01   1.4007024e+01  -3.4718909e+01   1.2910067e+01
   1.8579146e+01  -2.5647854e+01   5.0000000e+01   1.3605239e+01  -3.5583543e+01   9.5329281e+00
   1.8605246e+01  -2.5774207e+01   5.0000000e+01   1.1856792e+01  -3.5319451e+01   4.8579810e+00
   1.8636388e+01  -2.5899636e+01   5.0000000e+01   8.3402046e+00  -3.3870150e+01   7.6899993e-03
   1.8672548e+01  -2.6023979e+01   5.0000000e+01   3.2843405e+00  -3.1313054e+01  -3.9231496e+00
   1.8713696e+01  -2.6147074e+01   5.0000000e+01  -2.7645999e+00  -2.7700538e+01  -6.0041784e+00
   1.8759793e+01  -2.6268760e+01   5.0000000e+01  -8.9781784e+00  -2.3342451e+01  -5.4255166e+00
   1.8810796e+01  -2.6388879e+01   5.0000000e+01  -1.4193769e+01  -1.9130384e+01  -1.8564795e+00
   1.8866653e+01  -2.6507272e+01   5.0000000e+01  -1.7183551e+01  -1.6308812e+01   3.9128295e+00
   1.8927306e+01  -2.6623784e+01   5.0000000e+01  -1.7627028e+01  -1.5745060e+01   9.9066459e+00
   1.8992690e+01  -2.6738261e+01   5.0000000e+01  -1.6647832e+01  -1.7458106e+01   1.4447141e+01
   1.9062733e+01  -2.6850551e+01   5.0000000e+01  -1.5519221e+01  -2.0775168e+01   1.7355077e+01
   1.9137356e+01  -2.6960505e+01   5.0000000e+01  -1.4477606e+01  -2.4828360e+01   1.9266524e+01
   1.9216473e+01  -2.7067975e+01   5.0000000e+01  -1.2950469e+01  -2.9055506e+01   2.0402862e+01
   1.9299993e+01  -2.7172819e+01   5.0000000e+01  -1.0586432e+01  -3.3084415e+01   1.9938143e+01
   1.9387815e+01  -2.7274895e+01   5.0000000e+01  -8.0345413e+00  -3.6132584e+01   1.7007567e+01
   1.9479834e+01  -2.7374065e+01   5.0000000e+01  -6.2140777e+00  -3.7347136e+01   1.2059547e+01
   1.9575937e+01  -2.7470196e+01   5.0000000e+01  -5.4276479e+00  -3.6486647e+01   6.2825999e+00
   1.9676006e+01  -2.7563157e+01   5.0000000e+01  -5.5105993e+00  -3.3871757e+01   6.3977592e-01
   1.9779915e+01  -2.7652821e+01   5.0000000e+01  -6.2972218e+00  -3.0050693e+01  -4.5563333e+00
   1.9887532e+01  -2.7739068e+01   5.0000000e+01  -8.2895625e+00  -2.5302069e+01  -8.9872084e+00
   1.9998720e+01  -2.7821778e+01   5.0000000e+01  -1.1926409e+01  -2.0210328e+01  -1.1142159e+01
   2.0113335e+01  -2.7900838e+01   5.0000000e+01  -1.6445238e+01  -1.6320301e+01  -9.8167852e+00
   2.0231228e+01  -2.7976139e+01   5.0000000e+01  -2.0648495e+01  -1.5191636e+01  -5.5535761e+00
   2.0352244e+01  -2.8047578e+01   5.0000000e+01  -2.3278194e+01  -1.7734229e+01  -1.3907981e-01
   2.0476222e+01  -2.8115056e+01   5.0000000e+01  -2.3154930e+01  -2.3839721e+01   3.3922315e+00
   2.0602998e+01  -2.8178480e+01   5.0000000e+01  -2.0137936e+01  -3.1747168e+01   1.6348769e+00
   2.0732401e+01  -2.8237761e+01   5.0000000e+01  -1.5434826e+01  -3.8355493e+01  -7.2107640e+00
   2.0864256e+01  -2.8292817e+01   5.0000000e+01  -1.1253991e+01  -4.0457801e+01  -2.1895342e+01
   2.0998384e+01  -2.8343571e+01   5.0000000e+01  -9.6322602e+00  -3.6604222e+01  -3.8256038e+01
   2.1134602e+01  -2.8389953e+01   5.0000000e+01  -1.0798474e+01  -2.7635750e+01  -5.1598040e+01
   2.1272723e+01  -2.8431898e+01   5.0000000e+01  -1.3146865e+01  -1.5926894e+01  -5.8285899e+01
   2.1412557e+01  -2.8469346e+01   5.0000000e+01  -1.4436232e+01  -5.4108198e+00  -5.7369821e+01
   2.1553910e+01  -2.8502246e+01   5.0000000e+01  -1.3188836e+01   1.0904599e+00  -5.1936770e+01
   2.2269128e+01  -2.8725255e+01   5.0000000e+01   1.1263764e+01   5.9357813e+00  -6.4675360e+01
   2.2415792e+01  -2.8730185e+01   5.0000000e+01   1.1046086e+01   2.8699984e+01  -6.5532362e+01
   2.2562566e+01  -2.8730523e+01   5.0000000e+01   5.2949647e+00   5.2777309e+01  -4.9825081e+01
   2.2709259e+01  -2.8726270e+01   5.0000000e+01  -2.8789351e+00   6.5142609e+01  -2.3704510e+01
   2.2855675e+01  -2.8717431e+01   5.0000000e+01  -1.0905707e+01   6.4662092e+01  -1.8213491e+00
   2.3001624e+01  -2.8704018e+01   5.0000000e+01  -1.6969943e+01   6.1065468e+01   1.1514355e+01
   2.3146912e+01  -2.8686049e+01   5.0000000e+01  -1.9050767e+01   5.7760052e+01   2.2356579e+01
   2.3291350e+01  -2.8663546e+01   5.0000000e+01  -1.6925270e+01   5.1621376e+01   3.2430178e+01
   2.3434748e+01  -2.8636541e+01   5.0000000e+01  -1.3153203e+01   4.2511680e+01   3.9591553e+01
   2.3576918e+01  -2.8605068e+01   5.0000000e+01  -1.0539659e+01   3.2570878e+01   4.3086006e+01
   2.3717676e+01  -2.8569169e+01   5.0000000e+01  -9.7979514e+00   2.3575631e+01   4.3333047e+01
   2.3856838e+01  -2.8528892e+01   5.0000000e+01  -1.0102616e+01   1.6300363e+01   4.1169899e+01
   2.3994225e+01  -2.8484289e+01   5.0000000e+01  -1.0568738e+01   1.1000614e+01   3.7283165e+01
   2.4129659e+01  -2.8435419e+01   5.0000000e+01  -1.0758443e+01   8.0807650e+00   3.2449776e+01
   2.4262966e+01  -2.8382346e+01   5.0000000e+01  -1.0603178e+01   7.8139050e+00   2.8040220e+01
   2.4393977e+01  -2.8325140e+01   5.0000000e+01  -1.0375121e+01   9.4808879e+00   2.5588467e+01
   2.4522525e+01  -2.8263874e+01   5.0000000e+01  -1.0212654e+01   1.1554711e+01   2.5513472e+01
   2.4648447e+01  -2.8198630e+01   5.0000000e+01  -9.8353632e+00   1.2874053e+01   2.7258957e+01
   2.4771586e+01  -2.8129492e+01   5.0000000e+01  -8.9628503e+00   1.3030463e+01   3.0053981e+01
   2.4891788e+01  -2.8056549e+01   5.0000000e+01  -7.5889962e+00   1.2220378e+01   3.3474121e+01
   2.5008905e+01  -2.7979897e+01   5.0000000e+01  -6.3427689e+00   1.0623661e+01   3.7481300e+01
   2.5122793e+01  -2.7899633e+01   5.0000000e+01  -6.3506568e+00   8.1535573e+00   4.1511374e+01
   2.5233313e+01  -2.7815863e+01   5.0000000e+01  -8.2897347e+00   4.6564598e+00   4.4104664e+01
   2.5340333e+01  -2.7728693e+01   5.0000000e+01  -1.1658143e+01   2.5312636e-01   4.3594077e+01
   2.5443724e+01  -2.7638234e+01   5.0000000e+01  -1.4981378e+01  -4.5104525e+00   3.9353331e+01
   2.5543365e+01  -2.7544604e+01   5.0000000e+01  -1.6759548e+01  -9.0008268e+00   3.2334950e+01
   2.5639139e+01  -2.7447920e+01   5.0000000e+01  -1.6521348e+01  -1.2816336e+01   2.4276175e+01
   2.5730936e+01  -2.7348306e+01   5.0000000e+01  -1.4675095e+01  -1.5518557e+01   1.6338842e+01
   2.5818651e+01  -2.7245887e+01   5.0000000e+01  -1.1562248e+01  -1.6191880e+01   9.4706774e+00
   2.5902185e+01  -2.7140794e+01   5.0000000e+01  -7.8510825e+00  -1.4130783e+01   5.2116901e+00
   2.5981446e+01  -2.7033159e+01   5.0000000e+01  -4.9946112e+00  -9.7107861e+00   4.7851343e+00
   2.6056348e+01  -2.6923116e+01   5.0000000e+01  -4.6123483e+00  -4.4889049e+00   7.9146901e+00
   2.6126811e+01  -2.6810803e+01   5.0000000e+01  -7.3769476e+00  -2.6657774e-01   1.2501790e+01
   2.6192761e+01  -2.6696360e+01   5.0000000e+01  -1.2545054e+01   2.1984482e+00   1.5932410e+01
   2.6254129e+01  -2.6579929e+01   5.0000000e+01  -1.8682826e+01   3.2324345e+00   1.6537480e+01
   2.6310856e+01  -2.6461654e+01   5.0000000e+01  -2.4337267e+01   3.4264926e+00   1.3945734e+01
   2.6362886e+01  -2.6341682e+01   5.0000000e+01  -2.8440242e+01   3.0806893e+00   8.7435552e+00
   2.6410170e+01  -2.6220159e+01   5.0000000e+01  -3.0489545e+01   2.2511237e+00   1.7848052e+00
   2.6452665e+01  -2.6097235e+01   5.0000000e+01  -3.0199623e+01   1.0343674e+00  -6.3014077e+00
   2.6490336e+01  -2.5973060e+01   5.0000000e+01  -2.6981374e+01  -2.3024826e-01  -1.4450101e+01
   2.6523153e+01  -2.5847785e+01   5.0000000e+01  -2.1084880e+01  -1.2448960e+00  -2.0344598e+01
   2.6551090e+01  -2.5721561e+01   5.0000000e+01  -1.4622207e+01  -2.1984884e+00  -2.2332835e+01
   2.6574131e+01  -2.5594542e+01   5.0000000e+01  -9.6903551e+00  -3.5102993e+00  -2.1020494e+01
   2.6592264e+01  -2.5466880e+01   5.0000000e+01  -6.8870657e+00  -5.4177542e+00  -1.8171251e+01
   2.6605482e+01  -2.5338729e+01   5.0000000e+01  -5.2249560e+00  -7.9211351e+00  -1.5464797e+01
   2.6613785e+01  -2.5210243e+01   5.0000000e+01  -2.7670572e+00  -1.0610958e+01  -1.3080772e+01
   2.6617180e+01  -2.5081574e+01   5.0000000e+01   1.2010235e+00  -1.2722350e+01  -9.4794364e+00
   2.6615678e+01  -2.4952875e+01   5.0000000e+01   5.2768651e+00  -1.3885974e+01  -3.4058796e+00
   2.6609296e+01  -2.4824299e+01   5.0000000e+01   7.4115752e+00  -1.4504721e+01   4.8862548e+00
   2.6598056e+01  -2.4695999e+01   5.0000000e+01   6.2458604e+00  -1.5177769e+01   1.4042630e+01
   2.6581987e+01  -2.4568124e+01   5.0000000e+01   1.3588398e+00  -1.6008830e+01   2.2335421e+01
   2.6561123e+01  -2.4440827e+01   5.0000000e+01  -6.9015097e+00  -1.6361403e+01   2.7889836e+01
   2.6535501e+01  -2.4314254e+01   5.0000000e+01  -1.7129019e+01  -1.5239232e+01   2.8852520e+01
   2.6505167e+01  -2.4188555e+01   5.0000000e+01  -2.6923282e+01  -1.2241137e+01   2.4465290e+01
   2.6470168e+01  -2.4063876e+01   5.0000000e+01  -3.4214559e+01  -7.9630202e+00   1.5796217e+01
   2.6430559e+01  -2.3940361e+01   5.0000000e+01  -3.8343387e+01  -3.3343416e+00   4.6397064e+00
   2.6386398e+01  -2.3818154e+01   5.0000000e+01  -3.9267824e+01   8.6793131e-01  -8.0016912e+00
   2.6337749e+01  -2.3697395e+01   5.0000000e+01  -3.6043004e+01   3.8359827e+00  -2.1265521e+01
   2.6284679e+01  -2.3578225e+01   5.0000000e+01  -2.7595175e+01   4.9363181e+00  -3.2494663e+01
   2.6227262e+01  -2.3460779e+01   5.0000000e+01  -1.5475780e+01   4.6252949e+00  -3.8095416e+01
   2.6165574e+01  -2.3345193e+01   5.0000000e+01  -3.9131980e+00   4.0433437e+00  -3.7257208e+01
   2.6099696e+01  -2.3231599e+01   5.0000000e+01   4.0057910e+00   3.6799700e+00  -3.2807637e+01
   2.6029713e+01  -2.3120126e+01   5.0000000e+01   8.5675352e+00   3.6121360e+00  -2.7949707e+01
   2.5955714e+01  -2.3010902e+01   5.0000000e+01   1.1570821e+01   3.8140475e+00  -2.3706759e+01
   2.5877794e+01  -2.2904050e+01   5.0000000e+01   1.3672163e+01   4.0969231e+00  -1.9405829e+01
   2.5796047e+01  -2.2799692e+01   5.0000000e+01   1.4335277e+01   4.3966507e+00  -1.4956139e+01
   2.5710576e+01  -2.2697946e+01   5.0000000e+01   1.3591284e+01   4.6458774e+00  -1.1180252e+01
   2.5621484e+01  -2.2598927e+01   5.0000000e+01   1.2109855e+01   4.8476664e+00  -8.6515435e+00
   2.5528878e+01  -2.2502747e+01   5.0000000e+01   1.0549911e+01   4.8721451e+00  -7.6898479e+00
   2.5432870e+01  -2.2409513e+01   5.0000000e+01   9.5620815e+00   4.3349015e+00  -8.0796963e+00
   2.5333573e+01  -2.2319331e+01   5.0000000e+01   9.4520450e+00   3.1595547e+00  -9.0647737e+00
   2.5231104e+01  -2.2232302e+01   5.0000000e+01   1.0189431e+01   1.5395216e+00  -1.0114497e+01
   2.5125583e+01  -2.2148524e+01   5.0000000e+01   1.1743662e+01  -6.1303976e-01  -1.0887517e+01
   2.5017132e+01  -2.2068090e+01   5.0000000e+01   1.3860061e+01  -3.5534870e+00  -1.0744069e+01
   2.4905878e+01  -2.1991089e+01   5.0000000e+01   1.5966956e+01  -7.0777059e+00  -9.0887456e+00
   2.4791947e+01  -2.1917609e+01   5.0000000e+01   1.7551840e+01  -1.0486720e+01  -5.7621420e+00
   2.4675470e+01  -2.1847731e+01   5.0000000e+01   1.8227134e+01  -1.2959411e+01  -1.0292853e+00
   2.4556580e+01  -2.1781533e+01   5.0000000e+01   1.7655073e+01  -1.3819347e+01   4.4763862e+00
   2.4435411e+01  -2.1719088e+01   5.0000000e+01   1.5564502e+01  -1.2401086e+01   9.4874037e+00
   2.4312100e+01  -2.1660467e+01   5.0000000e+01   1.2524884e+01  -8.8116361e+00   1.2050207e+01
   2.4186786e+01  -2.1605733e+01   5.0000000e+01   9.9304398e+00  -4.3224029e+00   1.1517819e+01
   2.4059608e+01  -2.1554947e+01   5.0000000e+01   8.3313021e+00   1.0394370e-02   8.5229061e+00
   2.3930710e+01  -2.1508167e+01   5.0000000e+01   7.5316117e+00   3.0256220e+00   3.3549847e+00
   2.3800234e+01  -2.1465444e+01   5.0000000e+01   7.4413626e+00   3.2925233e+00  -2.9113560e+00
   2.3668325e+01  -2.1426825e+01   5.0000000e+01   7.7854868e+00   5.0383734e-01  -8.1594384e+00
   2.3535131e+01  -2.1392352e+01   5.0000000e+01   8.0319894e+00  -4.1674730e+00  -1.0578499e+01
   2.3400797e+01  -2.1362065e+01   5.0000000e+01   7.5587309e+00  -8.6823804e+00  -9.8640531e+00
   2.3265473e+01  -2.1335996e+01   5.0000000e+01   5.8986056e+00  -1.1579583e+01  -7.4780358e+00
   2.3129308e+01  -2.1314174e+01   5.0000000e+01   3.0106574e+00  -1.2980746e+01  -5.2952380e+00
   2.2992451e+01  -2.1296624e+01   5.0000000e+01  -6.7744371e-01  -1.4057432e+01  -4.0313676e+00
   2.2855053e+01  -2.1283364e+01   5.0000000e+01  -4.6337603e+00  -1.5553387e+01  -2.9950873e+00
   2.2717265e+01  -2.1274410e+01   5.0000000e+01  -8.6348602e+00  -1.7071479e+01  -1.3838174e+00
   2.2579239e+01  -2.1269771e+01   5.0000000e+01  -1.2681960e+01  -1.7814880e+01   6.3675216e-01
   2.2441126e+01  -2.1269452e+01   5.0000000e+01  -1.6597711e+01  -1.7689655e+01   2.0863146e+00
   2.2303077e+01  -2.1273454e+01   5.0000000e+01  -1.9894114e+01  -1.7627373e+01   2.3808288e+00
   2.2165245e+01  -2.1281773e+01   5.0000000e+01  -2.2195410e+01  -1.8604911e+01   2.1721139e+00
   2.2027780e+01  -2.1294398e+01   5.0000000e+01  -2.3502987e+01  -2.0662671e+01   2.6813602e+00
   2.1890834e+01  -2.1311317e+01   5.0000000e+01  -2.3954177e+01  -2.3007346e+01   4.5059872e+00
   2.1754557e+01  -2.1332510e+01   5.0000000e+01  -2.3636438e+01  -2.4960193e+01   7.2249161e+00
   2.1619100e+01  -2.1357955e+01   5.0000000e+01  -2.2707107e+01  -2.6574832e+01   1.0223982e+01
   2.1484611e+01  -2.1387622e+01   5.0000000e+01  -2.1544768e+01  -2.8094015e+01   1.3558835e+01
   2.1351239e+01  -2.1421479e+01   5.0000000e+01  -2.0636829e+01  -2.9108524e+01   1.7752522e+01
   2.1219132e+01  -2.1459490e+01   5.0000000e+01  -2.0352742e+01  -2.8471318e+01   2.2942725e+01
   2.1088435e+01  -2.1501611e+01   5.0000000e+01  -2.0728527e+01  -2.5146245e+01   2.8221341e+01
   2.0959295e+01  -2.1547796e+01   5.0000000e+01  -2.1384893e+01  -1.9457454e+01   3.2041121e+01
   2.0831855e+01  -2.1597994e+01   5.0000000e+01  -2.1797242e+01  -1.2957527e+01   3.3620157e+01
   2.0706257e+01  -2.1652149e+01   5.0000000e+01  -2.1667755e+01  -7.0006688e+00   3.3283822e+01
   2.0582642e+01  -2.1710202e+01   5.0000000e+01  -2.1023199e+01  -2.1758835e+00   3.1816523e+01
   2.0461148e+01  -2.1772087e+01   5.0000000e+01  -2.0064107e+01   1.5871195e+00   2.9890177e+01
   2.0341913e+01  -2.1837736e+01   5.0000000e+01  -1.9206100e+01   4.4991177e+00   2.7756150e+01
   2.0225072e+01  -2.1907076e+01   5.0000000e+01  -1.8988999e+01   6.6219742e+00   2.5826261e+01
   2.0110758e+01  -2.1980030e+01   5.0000000e+01  -1.9591646e+01   8.2876885e+00   2.4746594e+01
   1.9999101e+01  -2.2056517e+01   5.0000000e+01  -2.0729385e+01   9.9679422e+00   2.4749860e+01
   1.9890229e+01  -2.2136450e+01   5.0000000e+01  -2.2023675e+01   1.1816283e+01   2.5693837e+01
   1.9784268e+01  -2.2219741e+01   5.0000000e+01  -2.3115478e+01   1.3712449e+01   2.7581648e+01
   1.9681341e+01  -2.2306297e+01   5.0000000e+01  -2.3423118e+01   1.5650514e+01   3.0481471e+01
   1.9581569e+01  -2.2396020e+01   5.0000000e+01  -2.2277071e+01   1.7684862e+01   3.3969849e+01
   1.9485068e+01  -2.2488810e+01   5.0000000e+01  -1.9408020e+01   1.9628874e+01   3.7191835e+01
   1.9391954e+01  -2.2584563e+01   5.0000000e+01  -1.5170586e+01   2.1085328e+01   3.9419614e+01
   1.9302337e+01  -2.2683170e+01   5.0000000e+01  -1.0229545e+01   2.1725830e+01   4.0455542e+01
   1.9216325e+01  -2.2784521e+01   5.0000000e+01  -5.1131704e+00   2.1495870e+01   4.0436183e+01
   1.9134023e+01  -2.2888502e+01   5.0000000e+01  -1.5733209e-01   2.0510127e+01   3.9479151e+01
   1.9055532e+01  -2.2994993e+01   5.0000000e+01   4.3388250e+00   1.8884188e+01   3.7655737e+01
   1.8980949e+01  -2.3103875e+01   5.0000000e+01   8.1150345e+00   1.6665872e+01   3.5191379e+01
   1.8910369e+01  -2.3215024e+01   5.0000000e+01   1.1123652e+01   1.3968555e+01   3.2412332e+01
   1.8843880e+01  -2.3328314e+01   5.0000000e+01   1.3370771e+01   1.0997915e+01   2.9458277e+01
   1.8781568e+01  -2.3443614e+01   5.0000000e+01   1.4658818e+01   7.9395274e+00   2.6413786e+01
   1.8723516e+01  -2.3560794e+01   5.0000000e+01   1.4684648e+01   4.9716873e+00   2.3649814e+01
   1.8669801e+01  -2.3679719e+01   5.0000000e+01   1.3468724e+01   2.3810947e+00   2.1862516e+01
   1.8620496e+01  -2.3800252e+01   5.0000000e+01   1.1582507e+01   5.3934895e-01   2.1533776e+01
   1.8575669e+01  -2.3922254e+01   5.0000000e+01   9.8081896e+00  -4.0513166e-01   2.2565722e+01
   1.8535385e+01  -2.4045585e+01   5.0000000e+01   8.7825012e+00  -6.7194978e-01   2.4444128e+01
   1.8499702e+01  -2.4170102e+01   5.0000000e+01   8.8366892e+00  -7.3448506e-01   2.6524820e+01
   1.8468677e+01  -2.4295659e+01   5.0000000e+01   9.9977810e+00  -1.1733179e+00   2.8199446e+01
   1.8442357e+01  -2.4422112e+01   5.0000000e+01   1.1959126e+01  -2.5779044e+00   2.8987857e+01
   1.8420789e+01  -2.4549313e+01   5.0000000e+01   1.4190197e+01  -5.3180712e+00   2.8712430e+01
   1.8404011e+01  -2.4677111e+01   5.0000000e+01   1.6099693e+01  -9.2072871e+00   2.7456684e+01
   1.8392057e+01  -2.4805359e+01   5.0000000e+01   1.7104440e+01  -1.3541697e+01   2.5549360e+01
   1.8384957e+01  -2.4933903e+01   5.0000000e+01   1.6830737e+01  -1.7604149e+01   2.3586100e+01
   1.8382734e+01  -2.5062593e+01   5.0000000e+01   1.5427894e+01  -2.1061307e+01   2.2335450e+01
   1.8385406e+01  -2.5191276e+01   5.0000000e+01   1.3767807e+01  -2.3869242e+01   2.2228155e+01
   1.8392985e+01  -2.5319800e+01   5.0000000e+01   1.2877380e+01  -2.6059344e+01   2.2791843e+01
   1.8405478e+01  -2.5448010e+01   5.0000000e+01   1.3126300e+01  -2.7675152e+01   2.2872929e+01
   1.8422886e+01  -2.5575753e+01   5.0000000e+01   1.3953021e+01  -2.8759821e+01   2.1336468e+01
   1.8445204e+01  -2.5702876e+01   5.0000000e+01   1.4197010e+01  -2.9275295e+01   1.7759432e+01
   1.8472420e+01  -2.5829227e+01   5.0000000e+01   1.2827204e+01  -2.9089811e+01   1.2739502e+01
   1.8504519e+01  -2.5954652e+01   5.0000000e+01   9.5944218e+00  -2.8111701e+01   7.4993861e+00
   1.8541475e+01  -2.6078999e+01   5.0000000e+01   4.9476780e+00  -2.6280843e+01   3.0541493e+00
   1.8583262e+01  -2.6202117e+01   5.0000000e+01  -5.4840659e-01  -2.3527698e+01   6.5934390e-02
   1.8629842e+01  -2.6323855e+01   5.0000000e+01  -6.3324084e+00  -1.9981728e+01  -7.8961197e-01
   1.8681175e+01  -2.6444066e+01   5.0000000e+01  -1.1554410e+01  -1.6296198e+01   1.1075922e+00
   1.8737212e+01  -2.6562600e+01   5.0000000e+01  -1.5070370e+01  -1.3565971e+01   5.4451568e+00
   1.8797900e+01  -2.6679312e+01   5.0000000e+01  -1.6566177e+01  -1.2665813e+01   1.0712867e+01
   1.8863178e+01  -2.6794057e+01   5.0000000e+01  -1.6863830e+01  -1.3816764e+01   1.5737175e+01
   1.8932980e+01  -2.6906693e+01   5.0000000e+01  -1.6537012e+01  -1.6655302e+01   2.0284822e+01
   1.9007232e+01  -2.7017079e+01   5.0000000e+01  -1.5418056e+01  -2.0462021e+01   2.4210346e+01
   1.9085856e+01  -2.7125079e+01   5.0000000e+01  -1.3154064e+01  -2.4566499e+01   2.7020176e+01
   1.9168766e+01  -2.7230555e+01   5.0000000e+01  -9.8217722e+00  -2.8600436e+01   2.7841531e+01
   1.9255870e+01  -2.7333376e+01   5.0000000e+01  -6.2550813e+00  -3.2097768e+01   2.5903086e+01
   1.9347071e+01  -2.7433411e+01   5.0000000e+01  -3.4751326e+00  -3.4307604e+01   2.1417704e+01
   1.9442266e+01  -2.7530535e+01   5.0000000e+01  -1.9195603e+00  -3.4732428e+01   1.5359453e+01
   1.9541343e+01  -2.7624624e+01   5.0000000e+01  -1.5977163e+00  -3.3353298e+01   8.7010238e+00
   1.9644189e+01  -2.7715557e+01   5.0000000e+01  -2.4844766e+00  -3.0541752e+01   2.0710603e+00
   1.9750682e+01  -2.7803219e+01   5.0000000e+01  -4.9811242e+00  -2.6508490e+01  -4.0034232e+00
   1.9860694e+01  -2.7887498e+01   5.0000000e+01  -9.3499120e+00  -2.1398536e+01  -7.9590453e+00
   1.9974094e+01  -2.7968285e+01   5.0000000e+01  -1.4606410e+01  -1.6267341e+01  -8.1818366e+00
   2.0090744e+01  -2.8045476e+01   5.0000000e+01  -1.9363025e+01  -1.2745702e+01  -4.5499151e+00
   2.0210501e+01  -2.8118972e+01   5.0000000e+01  -2.2343509e+01  -1.2462310e+01   1.7744510e+00
   2.0333216e+01  -2.8188677e+01   5.0000000e+01  -2.2417001e+01  -1.6493533e+01   7.9371388e+00
   2.0458737e+01  -2.8254501e+01   5.0000000e+01  -1.9697389e+01  -2.4321722e+01   9.9301185e+00
   2.0586908e+01  -2.8316358e+01   5.0000000e+01  -1.5766613e+01  -3.3630193e+01   4.6554687e+00
   2.0717566e+01  -2.8374168e+01   5.0000000e+01  -1.2830659e+01  -4.0795473e+01  -8.4157973e+00
   2.0850545e+01  -2.8427855e+01   5.0000000e+01  -1.2799095e+01  -4.2250977e+01  -2.5997161e+01
   2.0985676e+01  -2.8477349e+01   5.0000000e+01  -1.6083068e+01  -3.7296594e+01  -4.2265338e+01
   2.1122786e+01  -2.8522585e+01   5.0000000e+01  -2.1108724e+01  -2.8164969e+01  -5.2985141e+01
   2.1261698e+01  -2.8563504e+01   5.0000000e+01  -2.5157308e+01  -1.7850136e+01  -5.6494578e+01
   2.1402232e+01  -2.8600051e+01   5.0000000e+01  -2.5733732e+01  -9.7454359e+00  -5.4012686e+01
   2.1544205e+01  -2.8632180e+01   5.0000000e+01  -2.2466891e+01  -5.2032970e+00  -4.9476115e+01
   2.1687434e+01  -2.8659846e+01   5.0000000e+01  -1.6865212e+01  -3.5195901e+00  -4.5339443e+01
   2.1831730e+01  -2.8683015e+01   5.0000000e+01  -9.9867176e+00  -4.7099172e+00  -4.3177415e+01
   2.1976905e+01  -2.8701654e+01   5.0000000e+01  -2.1183764e+00  -7.2304333e+00  -4.5904835e+01
   2.2122768e+01  -2.8715741e+01   5.0000000e+01   5.8502464e+00  -5.8111605e+00  -5.4656349e+01
   2.2871159e+01  -2.8845191e+01   5.0000000e+01   3.1538164e+00   7.0592633e+01   2.8824703e+00
   2.3016710e+01  -2.8831814e+01   5.0000000e+01  -3.8522390e+00   6.4338258e+01   2.0972516e+01
   2.3161629e+01  -2.8814061e+01   5.0000000e+01  -8.1368770e+00   5.6526418e+01   3.3260875e+01
   2.3305737e+01  -2.8791954e+01   5.0000000e+01  -9.0409558e+00   4.7180783e+01   4.0491690e+01
   2.3448861e+01  -2.8765519e+01   5.0000000e+01  -8.1559754e+00   3.7974651e+01   4.3399943e+01
   2.3590824e+01  -2.8734790e+01   5.0000000e+01  -7.4150099e+00   2.9825737e+01   4.3999912e+01
   2.3731456e+01  -2.8699805e+01   5.0000000e+01  -7.7472072e+00   2.2610462e+01   4.3215447e+01
   2.3870586e+01  -2.8660605e+01   5.0000000e+01  -8.9440896e+00   1.6327286e+01   4.1013118e+01
   2.4008046e+01  -2.8617239e+01   5.0000000e+01  -1.0352061e+01   1.1461965e+01   3.7284826e+01
   2.4143671e+01  -2.8569760e+01   5.0000000e+01  -1.1506265e+01   8.7903001e+00   3.2591018e+01
   2.4277300e+01  -2.8518226e+01   5.0000000e+01  -1.2176732e+01   8.7516200e+00   2.8252418e+01
   2.4408774e+01  -2.8462700e+01   5.0000000e+01  -1.2376362e+01   1.0708021e+01   2.6023293e+01
   2.4537936e+01  -2.8403249e+01   5.0000000e+01  -1.2353545e+01   1.2778573e+01   2.6569381e+01
   2.4664636e+01  -2.8339946e+01   5.0000000e+01  -1.2011802e+01   1.3454515e+01   2.8836394e+01
   2.4788725e+01  -2.8272867e+01   5.0000000e+01  -1.1002024e+01   1.2496134e+01   3.1507538e+01
   2.4910059e+01  -2.8202094e+01   5.0000000e+01  -9.1917812e+00   1.0444010e+01   3.3896481e+01
   2.5028498e+01  -2.8127711e+01   5.0000000e+01  -6.7522325e+00   7.9495643e+00   3.6090304e+01
   2.5143907e+01  -2.8049808e+01   5.0000000e+01  -4.4123593e+00   5.3356744e+00   3.8540467e+01
   2.5256155e+01  -2.7968479e+01   5.0000000e+01  -3.5220784e+00   2.5773199e+00   4.1189558e+01
   2.5365115e+01  -2.7883822e+01   5.0000000e+01  -5.2628151e+00  -4.4113294e-01   4.2860601e+01
   2.5470667e+01  -2.7795936e+01   5.0000000e+01  -9.5450221e+00  -3.6003907e+00   4.1882952e+01
   2.5572694e+01  -2.7704927e+01   5.0000000e+01  -1.4862224e+01  -6.6346315e+00   3.7246313e+01
   2.5671085e+01  -2.7610903e+01   5.0000000e+01  -1.9127402e+01  -9.2085398e+00   2.9274374e+01
   2.5765733e+01  -2.7513975e+01   5.0000000e+01  -2.1019761e+01  -1.1007670e+01   1.9475864e+01
   2.5856538e+01  -2.7414257e+01   5.0000000e+01  -2.0261983e+01  -1.1606727e+01   9.4601683e+00
   2.5943405e+01  -2.7311868e+01   5.0000000e+01  -1.6860974e+01  -1.0331138e+01   1.0321027e+00
   2.6026242e+01  -2.7206926e+01   5.0000000e+01  -1.1543231e+01  -6.9160270e+00  -3.4336192e+00
   2.6104966e+01  -2.7099554e+01   5.0000000e+01  -6.3752272e+00  -2.1708689e+00  -2.2961825e+00
   2.6179498e+01  -2.6989879e+01   5.0000000e+01  -3.9252222e+00   2.1330443e+00   3.6088259e+00
   2.6249764e+01  -2.6878026e+01   5.0000000e+01  -5.3765709e+00   4.5724831e+00   1.0967798e+01
   2.6315695e+01  -2.6764125e+01   5.0000000e+01  -9.8471332e+00   5.1741386e+00   1.6536020e+01
   2.6377231e+01  -2.6648309e+01   5.0000000e+01  -1.5752333e+01   4.8257822e+00   1.8910547e+01
   2.6434314e+01  -2.6530709e+01   5.0000000e+01  -2.1790325e+01   4.2335333e+00   1.7976941e+01
   2.6486893e+01  -2.6411461e+01   5.0000000e+01  -2.6938052e+01   3.6195821e+00   1.4081738e+01
   2.6534923e+01  -2.6290702e+01   5.0000000e+01  -3.0427784e+01   3.0461624e+00   7.7617533e+00
   2.6578363e+01  -2.6168567e+01   5.0000000e+01  -3.1783359e+01   2.6976324e+00  -3.6219089e-01
   2.6617180e+01  -2.6045196e+01   5.0000000e+01  -3.0387365e+01   2.8422244e+00  -9.3650349e+00
   2.6651344e+01  -2.5920729e+01   5.0000000e+01  -2.5883292e+01   3.4974864e+00  -1.7131193e+01
   2.6680833e+01  -2.5795305e+01   5.0000000e+01  -1.9776501e+01   4.1152629e+00  -2.1366871e+01
   2.6705628e+01  -2.5669065e+01   5.0000000e+01  -1.4538212e+01   3.8487840e+00  -2.1959116e+01
   2.6725717e+01  -2.5542152e+01   5.0000000e+01  -1.1383937e+01   2.0985727e+00  -2.0504940e+01
   2.6741092e+01  -2.5414705e+01   5.0000000e+01  -1.0002678e+01  -1.2631659e+00  -1.8900961e+01
   2.6751752e+01  -2.5286867e+01   5.0000000e+01  -8.4824357e+00  -5.8557781e+00  -1.8342441e+01
   2.6757700e+01  -2.5158780e+01   5.0000000e+01  -4.6705136e+00  -1.0616194e+01  -1.7563183e+01
   2.6758944e+01  -2.5030584e+01   5.0000000e+01   8.3006116e-01  -1.4273087e+01  -1.3943433e+01
   2.6755498e+01  -2.4902422e+01   5.0000000e+01   5.1264242e+00  -1.6541669e+01  -6.8560954e+00
   2.6747379e+01  -2.4774434e+01   5.0000000e+01   6.0384487e+00  -1.8130007e+01   1.9666615e+00
   2.6734612e+01  -2.4646759e+01   5.0000000e+01   3.1295221e+00  -1.9617687e+01   1.0261039e+01
   2.6717224e+01  -2.4519538e+01   5.0000000e+01  -2.9369458e+00  -2.0906335e+01   1.6263763e+01
   2.6695248e+01  -2.4392908e+01   5.0000000e+01  -1.0881344e+01  -2.1220797e+01   1.8875710e+01
   2.6668722e+01  -2.4267007e+01   5.0000000e+01  -1.9130198e+01  -1.9540904e+01   1.7746495e+01
   2.6637687e+01  -2.4141970e+01   5.0000000e+01  -2.6304895e+01  -1.5564519e+01   1.3170432e+01
   2.6602190e+01  -2.4017934e+01   5.0000000e+01  -3.1505675e+01  -1.0102452e+01   5.8567983e+00
   2.6562281e+01  -2.3895031e+01   5.0000000e+01  -3.4379515e+01  -4.3121041e+00  -3.3900362e+00
   2.6518015e+01  -2.3773393e+01   5.0000000e+01  -3.4643731e+01   9.2428883e-01  -1.4135458e+01
   2.6469452e+01  -2.3653150e+01   5.0000000e+01  -3.1272088e+01   4.6292085e+00  -2.5721627e+01
   2.6416655e+01  -2.3534430e+01   5.0000000e+01  -2.3045602e+01   5.9134198e+00  -3.5553540e+01
   2.6359690e+01  -2.3417361e+01   5.0000000e+01  -1.1322416e+01   5.3149794e+00  -3.9604187e+01
   2.6298630e+01  -2.3302065e+01   5.0000000e+01  -6.1676097e-01   4.5098539e+00  -3.7089079e+01
   2.6233547e+01  -2.3188666e+01   5.0000000e+01   6.2813175e+00   4.2196897e+00  -3.1721854e+01
   2.6164521e+01  -2.3077283e+01   5.0000000e+01   1.0507697e+01   4.2393509e+00  -2.6378344e+01
   2.6091634e+01  -2.2968034e+01   5.0000000e+01   1.3521703e+01   4.5371643e+00  -2.1082287e+01
   2.6014971e+01  -2.2861034e+01   5.0000000e+01   1.5206939e+01   4.9492317e+00  -1.5451526e+01
   2.5934621e+01  -2.2756394e+01   5.0000000e+01   1.5015347e+01   5.2251993e+00  -1.0022393e+01
   2.5850676e+01  -2.2654226e+01   5.0000000e+01   1.3294723e+01   5.1812483e+00  -5.7801797e+00
   2.5763230e+01  -2.2554635e+01   5.0000000e+01   1.0985944e+01   4.7799131e+00  -3.0014710e+00
   2.5672383e+01  -2.2457726e+01   5.0000000e+01   8.7124840e+00   4.2594878e+00  -1.7005692e+00
   2.5578234e+01  -2.2363601e+01   5.0000000e+01   7.0602463e+00   3.5383089e+00  -1.9381346e+00
   2.5480888e+01  -2.2272356e+01   5.0000000e+01   6.4537575e+00   2.3377975e+00  -3.0974977e+00
   2.5380451e+01  -2.2184087e+01   5.0000000e+01   6.8073211e+00   6.8014594e-01  -4.3704965e+00
   2.5277033e+01  -2.2098885e+01   5.0000000e+01   7.8589154e+00  -1.3330458e+00  -5.3326661e+00
   2.5170746e+01  -2.2016839e+01   5.0000000e+01   9.3408945e+00  -3.7903196e+00  -5.7675157e+00
   2.5061703e+01  -2.1938034e+01   5.0000000e+01   1.0997861e+01  -6.8102982e+00  -5.4006242e+00
   2.4950021e+01  -2.1862551e+01   5.0000000e+01   1.2625433e+01  -1.0120867e+01  -3.8298372e+00
   2.4835818e+01  -2.1790468e+01   5.0000000e+01   1.3827860e+01  -1.3004458e+01  -8.5362147e-01
   2.4719216e+01  -2.1721859e+01   5.0000000e+01   1.4094126e+01  -1.4768813e+01   3.1364686e+00
   2.4600336e+01  -2.1656796e+01   5.0000000e+01   1.3222740e+01  -1.4892641e+01   7.3931307e+00
   2.4479304e+01  -2.1595345e+01   5.0000000e+01   1.1468267e+01  -1.2901790e+01   1.0760217e+01
   2.4356246e+01  -2.1537569e+01   5.0000000e+01   9.6436995e+00  -9.2447077e+00   1.2107394e+01
   2.4231289e+01  -2.1483527e+01   5.0000000e+01   8.3426817e+00  -5.0278543e+00   1.1596481e+01
   2.4104564e+01  -2.1433276e+01   5.0000000e+01   7.4720118e+00  -8.5896410e-01   9.4830380e+00
   2.3976201e+01  -2.1386867e+01   5.0000000e+01   7.1732424e+00   2.2996014e+00   5.4771020e+00
   2.3846332e+01  -2.1344346e+01   5.0000000e+01   7.6227259e+00   3.1737320e+00   3.9617371e-01
   2.3715091e+01  -2.1305759e+01   5.0000000e+01   8.3577204e+00   1.3752922e+00  -4.0323151e+00
   2.3582613e+01  -2.1271144e+01   5.0000000e+01   8.6532481e+00  -2.3377844e+00  -6.2447189e+00
   2.3449032e+01  -2.1240537e+01   5.0000000e+01   7.9533897e+00  -6.1984160e+00  -5.7518280e+00
   2.3314487e+01  -2.1213968e+01   5.0000000e+01   6.0301971e+00  -8.5938313e+00  -3.7654551e+00
   2.3179113e+01  -2.1191466e+01   5.0000000e+01   3.0324606e+00  -9.4222140e+00  -2.2366538e+00
   2.3043048e+01  -2.1173053e+01   5.0000000e+01  -5.7376035e-01  -9.9277633e+00  -2.0955699e+00
   2.2906432e+01  -2.1158749e+01   5.0000000e+01  -4.3365317e+00  -1.1094516e+01  -2.6310860e+00
   2.2769404e+01  -2.1148566e+01   5.0000000e+01  -8.1374083e+00  -1.2599320e+01  -2.8240307e+00
   2.2632101e+01  -2.1142517e+01   5.0000000e+01  -1.2052686e+01  -1.3578594e+01  -2.7217260e+00
   2.2494664e+01  -2.1140607e+01   5.0000000e+01  -1.5881869e+01  -1.3926012e+01  -3.2011530e+00
   2.2357233e+01  -2.1142839e+01   5.0000000e+01  -1.9039211e+01  -1.4502732e+01  -4.5881020e+00
   2.2219947e+01  -2.1149209e+01   5.0000000e+01  -2.1174444e+01  -1.6060196e+01  -6.0891272e+00
   2.2082945e+01  -2.1159712e+01   5.0000000e+01  -2.2523112e+01  -1.8595254e+01  -6.6251206e+00
   2.1946367e+01  -2.1174336e+01   5.0000000e+01  -2.3443198e+01  -2.1549644e+01  -5.5717220e+00
   2.1810352e+01  -2.1193067e+01   5.0000000e+01  -2.3980185e+01  -2.4259272e+01  -3.0460685e+00
   2.1675037e+01  -2.1215886e+01   5.0000000e+01  -2.3961930e+01  -2.6488618e+01   4.0760916e-01
   2.1540561e+01  -2.1242768e+01   5.0000000e+01  -2.3316068e+01  -2.8336366e+01   4.4732377e+00
   2.1407062e+01  -2.1273688e+01   5.0000000e+01  -2.2214230e+01  -2.9650721e+01   9.2297626e+00
   2.1274674e+01  -2.1308613e+01   5.0000000e+01  -2.0974371e+01  -2.9644124e+01   1.4719471e+01
   2.1143535e+01  -2.1347507e+01   5.0000000e+01  -1.9959247e+01  -2.7263314e+01   2.0230354e+01
   2.1013778e+01  -2.1390331e+01   5.0000000e+01  -1.9433511e+01  -2.2411541e+01   2.4323674e+01
   2.0885538e+01  -2.1437040e+01   5.0000000e+01  -1.9302571e+01  -1.6477679e+01   2.6165925e+01
   2.0758945e+01  -2.1487588e+01   5.0000000e+01  -1.9086932e+01  -1.1002425e+01   2.6253939e+01
   2.0634131e+01  -2.1541921e+01   5.0000000e+01  -1.8380575e+01  -6.5838354e+00   2.5454687e+01
   2.0511225e+01  -2.1599984e+01   5.0000000e+01  -1.7222157e+01  -3.1373177e+00   2.4376642e+01
   2.0390356e+01  -2.1661718e+01   5.0000000e+01  -1.5867235e+01  -2.7112120e-01   2.3254223e+01
   2.0271649e+01  -2.1727059e+01   5.0000000e+01  -1.4632472e+01   2.2276026e+00   2.1929122e+01
   2.0155228e+01  -2.1795940e+01   5.0000000e+01  -1.3933470e+01   4.3339032e+00   2.0416468e+01
   2.0041217e+01  -2.1868290e+01   5.0000000e+01  -1.4034989e+01   6.1558864e+00   1.9062512e+01
   1.9929736e+01  -2.1944034e+01   5.0000000e+01  -1.4836521e+01   7.9079927e+00   1.8205252e+01
   1.9820903e+01  -2.2023094e+01   5.0000000e+01  -1.6072723e+01   9.6969476e+00   1.7965143e+01
   1.9714834e+01  -2.2105388e+01   5.0000000e+01  -1.7529709e+01   1.1442001e+01   1.8471829e+01
   1.9611643e+01  -2.2190831e+01   5.0000000e+01  -1.8827980e+01   1.3138700e+01   1.9974436e+01
   1.9511443e+01  -2.2279334e+01   5.0000000e+01  -1.9362200e+01   1.4904618e+01   2.2431200e+01
   1.9414341e+01  -2.2370806e+01   5.0000000e+01  -1.8628712e+01   1.6744908e+01   2.5366577e+01
   1.9320445e+01  -2.2465151e+01   5.0000000e+01  -1.6540354e+01   1.8448290e+01   2.8096733e+01
   1.9229858e+01  -2.2562272e+01   5.0000000e+01  -1.3433224e+01   1.9690865e+01   3.0150768e+01
   1.9142681e+01  -2.2662066e+01   5.0000000e+01  -9.7446224e+00   2.0281730e+01   3.1401192e+01
   1.9059011e+01  -2.2764431e+01   5.0000000e+01  -5.7984492e+00   2.0175827e+01   3.1859475e+01
   1.8978944e+01  -2.2869257e+01   5.0000000e+01  -1.8284986e+00   1.9386908e+01   3.1516832e+01
   1.8902571e+01  -2.2976436e+01   5.0000000e+01   1.8587645e+00   1.7895950e+01   3.0433987e+01
   1.8829981e+01  -2.3085855e+01   5.0000000e+01   5.0411608e+00   1.5740872e+01   2.8954609e+01
   1.8761258e+01  -2.3197399e+01   5.0000000e+01   7.7380181e+00   1.3150956e+01   2.7362959e+01
   1.8696485e+01  -2.3310949e+01   5.0000000e+01   9.9142932e+00   1.0381584e+01   2.5675713e+01
   1.8635740e+01  -2.3426387e+01   5.0000000e+01   1.1340656e+01   7.6229126e+00   2.3916322e+01
   1.8579096e+01  -2.3543589e+01   5.0000000e+01   1.1756222e+01   5.0908292e+00   2.2372088e+01
   1.8526625e+01  -2.3662432e+01   5.0000000e+01   1.1233130e+01   3.1191621e+00   2.1486661e+01
   1.8478394e+01  -2.3782787e+01   5.0000000e+01   1.0180766e+01   1.9879118e+00   2.1417581e+01
   1.8434464e+01  -2.3904529e+01   5.0000000e+01   9.0523735e+00   1.6491306e+00   2.2037422e+01
   1.8394896e+01  -2.4027524e+01   5.0000000e+01   8.2626640e+00   1.7513797e+00   2.3095746e+01
   1.8359743e+01  -2.4151643e+01   5.0000000e+01   8.0720830e+00   1.8388367e+00   2.4268996e+01
   1.8329057e+01  -2.4276751e+01   5.0000000e+01   8.4855280e+00   1.4401887e+00   2.5254775e+01
   1.8302882e+01  -2.4402714e+01   5.0000000e+01   9.2756288e+00   8.4966670e-02   2.5973500e+01
   1.8281261e+01  -2.4529395e+01   5.0000000e+01   1.0296454e+01  -2.4597875e+00   2.6614627e+01
   1.8264231e+01  -2.4656656e+01   5.0000000e+01   1.1562190e+01  -5.9107272e+00   2.7180615e+01
   1.8251824e+01  -2.4784360e+01   5.0000000e+01   1.2815235e+01  -9.5513375e+00   2.7355887e+01
   1.8244067e+01  -2.4912367e+01   5.0000000e+01   1.3405093e+01  -1.2729145e+01   2.7064780e+01
   1.8240985e+01  -2.5040537e+01   5.0000000e+01   1.2966644e+01  -1.5225771e+01   2.6919269e+01
   1.8242593e+01  -2.5168729e+01   5.0000000e+01   1.2109765e+01  -1.7092026e+01   2.7583889e+01
   1.8248907e+01  -2.5296802e+01   5.0000000e+01   1.1893484e+01  -1.8384115e+01   2.8816943e+01
   1.8259933e+01  -2.5424615e+01   5.0000000e+01   1.2805324e+01  -1.9157233e+01   2.9544154e+01
   1.8275674e+01  -2.5552025e+01   5.0000000e+01   1.4381193e+01  -1.9562307e+01   2.8636538e+01
   1.8296128e+01  -2.5678892e+01   5.0000000e+01   1.5548158e+01  -1.9799451e+01   2.5617740e+01
   1.8321288e+01  -2.5805073e+01   5.0000000e+01   1.5258197e+01  -1.9959180e+01   2.0881205e+01
   1.8351141e+01  -2.5930428e+01   5.0000000e+01   1.3081068e+01  -1.9951377e+01   1.5458574e+01
   1.8385667e+01  -2.6054815e+01   5.0000000e+01   9.3362579e+00  -1.9609629e+01   1.0334571e+01
   1.8424844e+01  -2.6178095e+01   5.0000000e+01   4.5615760e+00  -1.8788026e+01   6.0895925e+00
   1.8468642e+01  -2.6300127e+01   5.0000000e+01  -7.9941039e-01  -1.7312431e+01   3.1795307e+00
   1.8517026e+01  -2.6420775e+01   5.0000000e+01  -6.3179428e+00  -1.5117573e+01   2.2629028e+00
   1.8569957e+01  -2.6539900e+01   5.0000000e+01  -1.1155786e+01  -1.2654044e+01   3.9123759e+00
   1.8627387e+01  -2.6657366e+01   5.0000000e+01  -1.4489757e+01  -1.0806794e+01   7.6349558e+00
   1.8689266e+01  -2.6773038e+01   5.0000000e+01  -1.6470000e+01  -1.0295974e+01   1.2490210e+01
   1.8755537e+01  -2.6886784e+01   5.0000000e+01  -1.7360768e+01  -1.1363327e+01   1.8124705e+01
   1.8826136e+01  -2.6998473e+01   5.0000000e+01  -1.6833237e+01  -1.3767298e+01   2.4078119e+01
   1.8900996e+01  -2.7107974e+01   5.0000000e+01  -1.4612780e+01  -1.7013497e+01   2.9357448e+01
   1.8980042e+01  -2.7215161e+01   5.0000000e+01  -1.0918176e+01  -2.0630042e+01   3.2847028e+01
   1.9063196e+01  -2.7319909e+01   5.0000000e+01  -6.4544947e+00  -2.4261583e+01   3.3762062e+01
   1.9150371e+01  -2.7422096e+01   5.0000000e+01  -2.1694243e+00  -2.7499360e+01   3.1828470e+01
   1.9241478e+01  -2.7521601e+01   5.0000000e+01   1.1239357e+00  -2.9755875e+01   2.7397824e+01
   1.9336421e+01  -2.7618308e+01   5.0000000e+01   3.0187998e+00  -3.0581064e+01   2.1231573e+01
   1.9435097e+01  -2.7712102e+01   5.0000000e+01   3.3264619e+00  -2.9824969e+01   1.4175340e+01
   1.9537402e+01  -2.7802872e+01   5.0000000e+01   1.9311138e+00  -2.7639039e+01   7.0525398e+00
   1.9643223e+01  -2.7890511e+01   5.0000000e+01  -1.3450912e+00  -2.4101584e+01   7.1189547e-01
   1.9752443e+01  -2.7974914e+01   5.0000000e+01  -6.3220337e+00  -1.9295616e+01  -3.4107265e+00
   1.9864941e+01  -2.8055980e+01   5.0000000e+01  -1.1957322e+01  -1.4119171e+01  -4.0975627e+00
   1.9980590e+01  -2.8133613e+01   5.0000000e+01  -1.7020591e+01  -1.0009199e+01  -1.1645147e+00
   2.0099259e+01  -2.8207718e+01   5.0000000e+01  -2.0196438e+01  -8.6302057e+00   4.6785845e+00
   2.0220812e+01  -2.8278208e+01   5.0000000e+01  -2.0412441e+01  -1.1388064e+01   1.0935793e+01
   2.0345108e+01  -2.8344997e+01   5.0000000e+01  -1.8158329e+01  -1.8215935e+01   1.3900530e+01
   2.0472005e+01  -2.8408004e+01   5.0000000e+01  -1.5446871e+01  -2.7467729e+01   1.0793942e+01
   2.0601352e+01  -2.8467152e+01   5.0000000e+01  -1.4507239e+01  -3.6448526e+01   7.6956944e-01
   2.0732999e+01  -2.8522371e+01   5.0000000e+01  -1.6765832e+01  -4.1634202e+01  -1.4536323e+01
   2.0866788e+01  -2.8573592e+01   5.0000000e+01  -2.2224021e+01  -4.0506219e+01  -3.0396012e+01
   2.1002562e+01  -2.8620753e+01   5.0000000e+01  -2.9221637e+01  -3.4188047e+01  -4.1654376e+01
   2.1140158e+01  -2.8663798e+01   5.0000000e+01  -3.5112998e+01  -2.6024235e+01  -4.6383636e+01
   2.1279410e+01  -2.8702672e+01   5.0000000e+01  -3.7283122e+01  -1.9107270e+01  -4.5922433e+01
   2.1420151e+01  -2.8737329e+01   5.0000000e+01  -3.4948903e+01  -1.4936881e+01  -4.3870196e+01
   2.1562211e+01  -2.8767726e+01   5.0000000e+01  -2.9719622e+01  -1.2642382e+01  -4.2675940e+01
   2.1705417e+01  -2.8793825e+01   5.0000000e+01  -2.3116359e+01  -1.2047174e+01  -4.2213141e+01
   2.1849595e+01  -2.8815595e+01   5.0000000e+01  -1.5587903e+01  -1.4105162e+01  -4.3999035e+01
   2.1994569e+01  -2.8833009e+01   5.0000000e+01  -7.3212030e+00  -1.6815517e+01  -5.1654596e+01
   2.2140162e+01  -2.8846046e+01   5.0000000e+01   1.2154880e+00  -1.3289293e+01  -6.5932972e+01
   2.2286196e+01  -2.8854688e+01   5.0000000e+01   8.4737514e+00   3.9323417e+00  -7.8937780e+01
   2.2432492e+01  -2.8858927e+01   5.0000000e+01   1.2636547e+01   3.2761485e+01  -7.7182392e+01
   2.2578871e+01  -2.8858755e+01   5.0000000e+01   1.3068547e+01   5.9589364e+01  -5.5491394e+01
   2.2725153e+01  -2.8854175e+01   5.0000000e+01   9.7069306e+00   7.1903199e+01  -2.3979217e+01
   2.3482750e+01  -2.8890663e+01   5.0000000e+01  -8.7301300e-01   3.4870597e+01   4.4078183e+01
   2.3625094e+01  -2.8859884e+01   5.0000000e+01  -2.7561551e+00   2.7824483e+01   4.4012144e+01
   2.3766142e+01  -2.8824969e+01   5.0000000e+01  -4.8821728e+00   2.1866284e+01   4.3256574e+01
   2.3905735e+01  -2.8785956e+01   5.0000000e+01  -7.3093435e+00   1.6446471e+01   4.1532316e+01
   2.4043712e+01  -2.8742890e+01   5.0000000e+01  -9.6610322e+00   1.2116360e+01   3.8392036e+01
   2.4179920e+01  -2.8695823e+01   5.0000000e+01  -1.1531751e+01   9.8597472e+00   3.4414936e+01
   2.4314203e+01  -2.8644807e+01   5.0000000e+01  -1.2706556e+01   1.0048733e+01   3.1027370e+01
   2.4446412e+01  -2.8589902e+01   5.0000000e+01  -1.3141354e+01   1.1877065e+01   2.9850305e+01
   2.4576399e+01  -2.8531171e+01   5.0000000e+01  -1.3057982e+01   1.3298066e+01   3.1369960e+01
   2.4704021e+01  -2.8468680e+01   5.0000000e+01  -1.2588767e+01   1.2737450e+01   3.4125280e+01
   2.4829135e+01  -2.8402501e+01   5.0000000e+01  -1.1504224e+01   1.0291197e+01   3.6362876e+01
   2.4951607e+01  -2.8332709e+01   5.0000000e+01  -9.6120042e+00   6.8859222e+00   3.7415561e+01
   2.5071302e+01  -2.8259385e+01   5.0000000e+01  -6.9389748e+00   3.3381568e+00   3.7495549e+01
   2.5188091e+01  -2.8182611e+01   5.0000000e+01  -3.7112001e+00   1.9623025e-01   3.7221988e+01
   2.5301850e+01  -2.8102474e+01   5.0000000e+01  -7.6166387e-01  -2.1278887e+00   3.7423676e+01
   2.5412458e+01  -2.8019064e+01   5.0000000e+01   2.6524121e-01  -3.6275010e+00   3.8519229e+01
   2.5519799e+01  -2.7932477e+01   5.0000000e+01  -1.9854739e+00  -4.7340153e+00   3.9683455e+01
   2.5623761e+01  -2.7842807e+01   5.0000000e+01  -7.3924594e+00  -5.8257436e+00   3.9143700e+01
   2.5724237e+01  -2.7750157e+01   5.0000000e+01  -1.4328155e+01  -6.8191533e+00   3.5282232e+01
   2.5821125e+01  -2.7654630e+01   5.0000000e+01  -2.0470111e+01  -7.2254468e+00   2.7848573e+01
   2.5914327e+01  -2.7556331e+01   5.0000000e+01  -2.4110247e+01  -6.5939463e+00   1.8126573e+01
   2.6003751e+01  -2.7455370e+01   5.0000000e+01  -2.4453970e+01  -4.6799851e+00   8.0065717e+00
   2.6089309e+01  -2.7351859e+01   5.0000000e+01  -2.1151828e+01  -1.4736748e+00  -1.8339819e-01
   2.6170918e+01  -2.7245912e+01   5.0000000e+01  -1.4979917e+01   2.5356265e+00  -3.7225787e+00
   2.6248502e+01  -2.7137645e+01   5.0000000e+01  -8.5896605e+00   6.1135254e+00  -1.1443803e+00
   2.6321987e+01  -2.7027176e+01   5.0000000e+01  -5.1648388e+00   7.9170430e+00   5.8247058e+00
   2.6391306e+01  -2.6914627e+01   5.0000000e+01  -5.9337317e+00   7.7356498e+00   1.3280790e+01
   2.6456397e+01  -2.6800120e+01   5.0000000e+01  -9.7927849e+00   6.4382888e+00   1.8369516e+01
   2.6517203e+01  -2.6683778e+01   5.0000000e+01  -1.5117976e+01   4.9008061e+00   2.0403449e+01
   2.6573672e+01  -2.6565729e+01   5.0000000e+01  -2.0805160e+01   3.5104312e+00   1.9537088e+01
   2.6625757e+01  -2.6446098e+01   5.0000000e+01  -2.5924094e+01   2.4592232e+00   1.5844130e+01
   2.6673417e+01  -2.6325015e+01   5.0000000e+01  -2.9555625e+01   2.1279534e+00   9.6769064e+00
   2.6716615e+01  -2.6202608e+01   5.0000000e+01  -3.1150854e+01   2.8748540e+00   1.8537611e+00
   2.6755319e+01  -2.6079009e+01   5.0000000e+01  -3.0236591e+01   4.6884717e+00  -6.5823793e+00
   2.6789504e+01  -2.5954348e+01   5.0000000e+01  -2.6491862e+01   7.1199022e+00  -1.3794590e+01
   2.6819147e+01  -2.5828758e+01   5.0000000e+01  -2.1241619e+01   9.3068850e+00  -1.7716523e+01
   2.6844232e+01  -2.5702371e+01   5.0000000e+01  -1.7017334e+01   1.0246999e+01  -1.8350645e+01
   2.6864748e+01  -2.5575320e+01   5.0000000e+01  -1.5116601e+01   9.1647443e+00  -1.7636673e+01
   2.6880688e+01  -2.5447738e+01   5.0000000e+01  -1.5122906e+01   5.7483018e+00  -1.7650370e+01
   2.6892049e+01  -2.5319759e+01   5.0000000e+01  -1.4975057e+01   3.1701438e-01  -1.9810564e+01
   2.6898836e+01  -2.5191515e+01   5.0000000e+01  -1.1581714e+01  -6.0480584e+00  -2.2813606e+01
   2.6901055e+01  -2.5063141e+01   5.0000000e+01  -4.7424180e+00  -1.1766870e+01  -2.2506345e+01
   2.6898718e+01  -2.4934768e+01   5.0000000e+01   1.6289925e+00  -1.5892426e+01  -1.6928118e+01
   2.6891843e+01  -2.4806529e+01   5.0000000e+01   4.0958139e+00  -1.8748031e+01  -8.4685257e+00
   2.6880449e+01  -2.4678557e+01   5.0000000e+01   2.2455135e+00  -2.0962931e+01  -4.3508486e-01
   2.6864563e+01  -2.4550981e+01   5.0000000e+01  -2.7455207e+00  -2.2612917e+01   5.0833692e+00
   2.6844215e+01  -2.4423934e+01   5.0000000e+01  -9.1146693e+00  -2.3238364e+01   7.2275848e+00
   2.6819438e+01  -2.4297543e+01   5.0000000e+01  -1.5210825e+01  -2.2076555e+01   6.5043563e+00
   2.6790271e+01  -2.4171938e+01   5.0000000e+01  -2.0402226e+01  -1.8658095e+01   3.9286915e+00
   2.6756755e+01  -2.4047245e+01   5.0000000e+01  -2.4667055e+01  -1.3357351e+01  -2.0098191e-01
   2.6718937e+01  -2.3923592e+01   5.0000000e+01  -2.7679801e+01  -7.1397587e+00  -6.0902769e+00
   2.6676867e+01  -2.3801102e+01   5.0000000e+01  -2.8831964e+01  -8.5540834e-01  -1.3688173e+01
   2.6630600e+01  -2.3679898e+01   5.0000000e+01  -2.7475020e+01   4.8108826e+00  -2.2719056e+01
   2.6580191e+01  -2.3560103e+01   5.0000000e+01  -2.2466659e+01   8.6571226e+00  -3.2225354e+01
   2.6525703e+01  -2.3441835e+01   5.0000000e+01  -1.3154977e+01   9.4888509e+00  -3.8838760e+01
   2.6467201e+01  -2.3325214e+01   5.0000000e+01  -2.2990449e+00   8.0481448e+00  -3.8854535e+01
   2.6404752e+01  -2.3210354e+01   5.0000000e+01   5.8075611e+00   6.5385747e+00  -3.3599008e+01
   2.6338428e+01  -2.3097370e+01   5.0000000e+01   1.0584274e+01   5.8222937e+00  -2.7319721e+01
   2.6268304e+01  -2.2986375e+01   5.0000000e+01   1.3754505e+01   5.4135362e+00  -2.1169472e+01
   2.6194458e+01  -2.2877477e+01   5.0000000e+01   1.5446957e+01   5.1265519e+00  -1.4477950e+01
   2.6116972e+01  -2.2770784e+01   5.0000000e+01   1.4979540e+01   4.9108125e+00  -7.8072610e+00
   2.6035928e+01  -2.2666402e+01   5.0000000e+01   1.2485886e+01   4.5367389e+00  -2.3897012e+00
   2.5951415e+01  -2.2564433e+01   5.0000000e+01   8.9993418e+00   3.7286087e+00   1.0335943e+00
   2.5863521e+01  -2.2464976e+01   5.0000000e+01   5.6461211e+00   2.4571473e+00   2.6598554e+00
   2.5772340e+01  -2.2368131e+01   5.0000000e+01   3.0486137e+00   1.1451203e+00   2.8721632e+00
   2.5677967e+01  -2.2273990e+01   5.0000000e+01   1.6055630e+00  -1.2467384e-02   1.8780623e+00
   2.5580500e+01  -2.2182646e+01   5.0000000e+01   1.3901036e+00  -1.2440675e+00   2.3785211e-01
   2.5480038e+01  -2.2094189e+01   5.0000000e+01   2.0615179e+00  -2.7319205e+00  -1.3921957e+00
   2.5376684e+01  -2.2008704e+01   5.0000000e+01   3.2266737e+00  -4.5145486e+00  -2.6142292e+00
   2.5270544e+01  -2.1926274e+01   5.0000000e+01   4.5840469e+00  -6.6133794e+00  -3.3259281e+00
   2.5161723e+01  -2.1846979e+01   5.0000000e+01   6.0674770e+00  -9.1919850e+00  -3.4863294e+00
   2.5050331e+01  -2.1770896e+01   5.0000000e+01   7.7401418e+00  -1.2196560e+01  -2.5937495e+00
   2.4936480e+01  -2.1698100e+01   5.0000000e+01   9.2498765e+00  -1.4880979e+01  -2.0045246e-01
   2.4820282e+01  -2.1628659e+01   5.0000000e+01   1.0031436e+01  -1.6440980e+01   3.1564659e+00
   2.4701851e+01  -2.1562642e+01   5.0000000e+01   1.0033410e+01  -1.6604477e+01   6.6137231e+00
   2.4581305e+01  -2.1500112e+01   5.0000000e+01   9.6077612e+00  -1.5099872e+01   9.6336934e+00
   2.4458761e+01  -2.1441130e+01   5.0000000e+01   9.0870837e+00  -1.1887630e+01   1.1616685e+01
   2.4334339e+01  -2.1385751e+01   5.0000000e+01   8.4637994e+00  -7.7107667e+00   1.2224023e+01
   2.4208160e+01  -2.1334030e+01   5.0000000e+01   7.5880280e+00  -3.4224605e+00   1.1363183e+01
   2.4080347e+01  -2.1286017e+01   5.0000000e+01   6.9038293e+00   1.4906649e-01   8.9274001e+00
   2.3951023e+01  -2.1241756e+01   5.0000000e+01   6.9459733e+00   2.1289748e+00   5.4701718e+00
   2.3820312e+01  -2.1201292e+01   5.0000000e+01   7.4665913e+00   2.1219820e+00   1.9818335e+00
   2.3688341e+01  -2.1164662e+01   5.0000000e+01   7.7644439e+00   2.2798919e-01  -6.2050384e-01
   2.3555235e+01  -2.1131903e+01   5.0000000e+01   7.2126072e+00  -2.7476299e+00  -1.4814717e+00
   2.3421124e+01  -2.1103045e+01   5.0000000e+01   5.4917970e+00  -5.2582560e+00  -6.1243002e-01
   2.3286135e+01  -2.1078115e+01   5.0000000e+01   2.6919330e+00  -6.2719154e+00   5.7632534e-01
   2.3150396e+01  -2.1057139e+01   5.0000000e+01  -6.8863887e-01  -6.3572608e+00   5.1145670e-01
   2.3014039e+01  -2.1040136e+01   5.0000000e+01  -4.0511573e+00  -6.8409448e+00  -8.9945774e-01
   2.2877192e+01  -2.1027122e+01   5.0000000e+01  -7.1818532e+00  -8.1054338e+00  -2.5969354e+00
   2.2739985e+01  -2.1018110e+01   5.0000000e+01  -1.0175515e+01  -9.4300825e+00  -4.0639080e+00
   2.2602551e+01  -2.1013108e+01   5.0000000e+01  -1.2966611e+01  -1.0307964e+01  -5.8603762e+00
   2.2465019e+01  -2.1012121e+01   5.0000000e+01  -1.5175960e+01  -1.1291497e+01  -8.4067078e+00
   2.2327520e+01  -2.1015150e+01   5.0000000e+01  -1.6529825e+01  -1.3117183e+01  -1.0981751e+01
   2.2190185e+01  -2.1022193e+01   5.0000000e+01  -1.7311687e+01  -1.5715340e+01  -1.2619923e+01
   2.2053146e+01  -2.1033242e+01   5.0000000e+01  -1.8100830e+01  -1.8711796e+01  -1.2985116e+01
   2.1916531e+01  -2.1048287e+01   5.0000000e+01  -1.9156439e+01  -2.1825620e+01  -1.2032880e+01
   2.1780472e+01  -2.1067314e+01   5.0000000e+01  -2.0262892e+01  -2.4780710e+01  -9.8720718e+00
   2.1645099e+01  -2.1090304e+01   5.0000000e+01  -2.1028108e+01  -2.7467048e+01  -6.6847753e+00
   2.1510540e+01  -2.1117235e+01   5.0000000e+01  -2.1143970e+01  -2.9824030e+01  -2.4700242e+00
   2.1376925e+01  -2.1148081e+01   5.0000000e+01  -2.0472817e+01  -3.1453665e+01   2.9001653e+00
   2.1244380e+01  -2.1182813e+01   5.0000000e+01  -1.9094153e+01  -3.1362011e+01   9.2119642e+00
   2.1113034e+01  -2.1221398e+01   5.0000000e+01  -1.7339307e+01  -2.8514703e+01   1.5218664e+01
   2.0983013e+01  -2.1263798e+01   5.0000000e+01  -1.5714186e+01  -2.3244882e+01   1.9056082e+01
   2.0854442e+01  -2.1309973e+01   5.0000000e+01  -1.4618014e+01  -1.7445304e+01   2.0116988e+01
   2.0727444e+01  -2.1359879e+01   5.0000000e+01  -1.3959379e+01  -1.2726543e+01   1.9681552e+01
   2.0602144e+01  -2.1413467e+01   5.0000000e+01  -1.3253648e+01  -9.2477888e+00   1.9200439e+01
   2.0478663e+01  -2.1470685e+01   5.0000000e+01  -1.2245762e+01  -6.4351121e+00   1.9074895e+01
   2.0357120e+01  -2.1531480e+01   5.0000000e+01  -1.1053708e+01  -3.8296281e+00   1.9003671e+01
   2.0237635e+01  -2.1595791e+01   5.0000000e+01  -9.8593589e+00  -1.3550540e+00   1.8586268e+01
   2.0120326e+01  -2.1663558e+01   5.0000000e+01  -8.8477192e+00   8.6976654e-01   1.7669754e+01
   2.0005307e+01  -2.1734714e+01   5.0000000e+01  -8.2546997e+00   2.8079620e+00   1.6365028e+01
   1.9892693e+01  -2.1809191e+01   5.0000000e+01  -8.2805864e+00   4.5664708e+00   1.4992468e+01
   1.9782595e+01  -2.1886917e+01   5.0000000e+01  -8.9709115e+00   6.3279573e+00   1.3858789e+01
   1.9675124e+01  -2.1967816e+01   5.0000000e+01  -1.0271911e+01   8.0828209e+00   1.3139244e+01
   1.9570388e+01  -2.2051811e+01   5.0000000e+01  -1.1987845e+01   9.7036730e+00   1.3126529e+01
   1.9468492e+01  -2.2138818e+01   5.0000000e+01  -1.3639978e+01   1.1230938e+01   1.4080011e+01
   1.9369541e+01  -2.2228755e+01   5.0000000e+01  -1.4643036e+01   1.2816662e+01   1.5909139e+01
   1.9273635e+01  -2.2321533e+01   5.0000000e+01  -1.4619479e+01   1.4514218e+01   1.8167844e+01
   1.9180874e+01  -2.2417061e+01   5.0000000e+01  -1.3549440e+01   1.6131778e+01   2.0340989e+01
   1.9091353e+01  -2.2515247e+01   5.0000000e+01  -1.1638809e+01   1.7397473e+01   2.2113987e+01
   1.9005168e+01  -2.2615993e+01   5.0000000e+01  -9.1533258e+00   1.8108352e+01   2.3341403e+01
   1.8922409e+01  -2.2719203e+01   5.0000000e+01  -6.3032961e+00   1.8131837e+01   2.4013562e+01
   1.8843164e+01  -2.2824773e+01   5.0000000e+01  -3.2520208e+00   1.7418962e+01   2.4130429e+01
   1.8767518e+01  -2.2932601e+01   5.0000000e+01  -2.8541701e-01   1.5970692e+01   2.3806981e+01
   1.8695556e+01  -2.3042579e+01   5.0000000e+01   2.4050771e+00   1.3961475e+01   2.3383538e+01
   1.8627356e+01  -2.3154600e+01   5.0000000e+01   4.8396836e+00   1.1699784e+01   2.3014557e+01
   1.8562994e+01  -2.3268552e+01   5.0000000e+01   6.9652600e+00   9.4199201e+00   2.2607928e+01
   1.8502543e+01  -2.3384322e+01   5.0000000e+01   8.5807761e+00   7.2847658e+00   2.2103120e+01
   1.8446075e+01  -2.3501796e+01   5.0000000e+01   9.4788576e+00   5.4783419e+00   2.1617636e+01
   1.8393654e+01  -2.3620856e+01   5.0000000e+01   9.6892595e+00   4.2462643e+00   2.1332265e+01
   1.8345344e+01  -2.3741382e+01   5.0000000e+01   9.4020960e+00   3.7230839e+00   2.1233125e+01
   1.8301205e+01  -2.3863256e+01   5.0000000e+01   8.7666418e+00   3.7520192e+00   2.1290304e+01
   1.8261291e+01  -2.3986353e+01   5.0000000e+01   8.0296845e+00   3.9795228e+00   2.1579255e+01
   1.8225656e+01  -2.4110551e+01   5.0000000e+01   7.4813447e+00   4.0318811e+00   2.2050652e+01
   1.8194347e+01  -2.4235723e+01   5.0000000e+01   7.1775241e+00   3.5483216e+00   2.2577235e+01
   1.8167407e+01  -2.4361744e+01   5.0000000e+01   6.9729193e+00   2.2219107e+00   2.3320870e+01
   1.8144879e+01  -2.4488485e+01   5.0000000e+01   6.9657750e+00   1.4358205e-02   2.4725371e+01
   1.8126796e+01  -2.4615817e+01   5.0000000e+01   7.6372858e+00  -2.7105155e+00   2.6811479e+01
   1.8113192e+01  -2.4743611e+01   5.0000000e+01   9.1493752e+00  -5.3331528e+00   2.8759247e+01
   1.8104094e+01  -2.4871735e+01   5.0000000e+01   1.0726001e+01  -7.3735072e+00   2.9746198e+01
   1.8099525e+01  -2.5000059e+01   5.0000000e+01   1.1405691e+01  -8.7321838e+00   3.0102576e+01
   1.8099504e+01  -2.5128449e+01   5.0000000e+01   1.1355981e+01  -9.5010943e+00   3.0836715e+01
   1.8104045e+01  -2.5256773e+01   5.0000000e+01   1.1670167e+01  -9.7449951e+00   3.2118869e+01
   1.8113158e+01  -2.5384899e+01   5.0000000e+01   1.3040918e+01  -9.5475915e+00   3.2971908e+01
   1.8126848e+01  -2.5512693e+01   5.0000000e+01   1.5120041e+01  -9.1547775e+00   3.2224979e+01
   1.8145116e+01  -2.5640021e+01   5.0000000e+01   1.6894851e+01  -8.8953256e+00   2.9378662e+01
   1.8167958e+01  -2.5766751e+01   5.0000000e+01   1.7324025e+01  -8.9928872e+00   2.4794603e+01
   1.8195363e+01  -2.5892749e+01   5.0000000e+01   1.5873718e+01  -9.5006355e+00   1.9435305e+01
   1.8227318e+01  -2.6017883e+01   5.0000000e+01   1.2726175e+01  -1.0289161e+01   1.4246531e+01
   1.8263805e+01  -2.6142020e+01   5.0000000e+01   8.3613256e+00  -1.1146457e+01   9.8294851e+00
   1.8304799e+01  -2.6265030e+01   5.0000000e+01   3.3320476e+00  -1.1837957e+01   6.5470013e+00
   1.8350270e+01  -2.6386779e+01   5.0000000e+01  -1.9028122e+00  -1.1985542e+01   4.5551046e+00
   1.8400186e+01  -2.6507140e+01   5.0000000e+01  -7.0202646e+00  -1.1299398e+01   4.2388381e+00
   1.8454507e+01  -2.6625982e+01   5.0000000e+01  -1.1438272e+01  -1.0087093e+01   5.9201671e+00
   1.8513188e+01  -2.6743179e+01   5.0000000e+01  -1.4878099e+01  -9.0849687e+00   9.3907039e+00
   1.8576181e+01  -2.6858603e+01   5.0000000e+01  -1.7279343e+01  -8.9232971e+00   1.4638779e+01
   1.8643430e+01  -2.6972130e+01   5.0000000e+01  -1.7912042e+01  -9.8312183e+00   2.1366542e+01
   1.8714876e+01  -2.7083636e+01   5.0000000e+01  -1.6188643e+01  -1.1581187e+01   2.8300959e+01
   1.8790455e+01  -2.7192999e+01   5.0000000e+01  -1.2404824e+01  -1.3902158e+01   3.3995497e+01
   1.8870096e+01  -2.7300101e+01   5.0000000e+01  -7.3663791e+00  -1.6648396e+01   3.7401905e+01
   1.8953724e+01  -2.7404824e+01   5.0000000e+01  -1.9841838e+00  -1.9570784e+01   3.8033473e+01
   1.9041259e+01  -2.7507052e+01   5.0000000e+01   2.9257453e+00  -2.2278304e+01   3.5876443e+01
   1.9132616e+01  -2.7606672e+01   5.0000000e+01   6.7009600e+00  -2.4283020e+01   3.1283249e+01
   1.9227705e+01  -2.7703575e+01   5.0000000e+01   8.9120230e+00  -2.5148302e+01   2.4898440e+01
   1.9326430e+01  -2.7797652e+01   5.0000000e+01   9.2616206e+00  -2.4601769e+01   1.7583201e+01
   1.9428692e+01  -2.7888798e+01   5.0000000e+01   7.6589401e+00  -2.2641767e+01   1.0344568e+01
   1.9534387e+01  -2.7976912e+01   5.0000000e+01   4.2166669e+00  -1.9319792e+01   4.0726341e+00
   1.9643403e+01  -2.8061895e+01   5.0000000e+01  -7.6957472e-01  -1.4709231e+01  -1.7174474e-01
   1.9755629e+01  -2.8143652e+01   5.0000000e+01  -6.6075399e+00  -9.5943007e+00  -1.3292948e+00
   1.9870945e+01  -2.8222089e+01   5.0000000e+01  -1.2243571e+01  -5.4123894e+00   1.0350796e+00
   1.9989228e+01  -2.8297119e+01   5.0000000e+01  -1.6152974e+01  -3.7893662e+00   6.3508138e+00
   2.0110352e+01  -2.8368657e+01   5.0000000e+01  -1.7141710e+01  -5.9695265e+00   1.2282654e+01
   2.0234185e+01  -2.8436620e+01   5.0000000e+01  -1.5855134e+01  -1.1838314e+01   1.5551788e+01
   2.0360592e+01  -2.8500932e+01   5.0000000e+01  -1.4499938e+01  -2.0015097e+01   1.4086447e+01
   2.0489434e+01  -2.8561520e+01   5.0000000e+01  -1.5191574e+01  -2.8680744e+01   7.5873542e+00
   2.0620570e+01  -2.8618313e+01   5.0000000e+01  -1.8971528e+01  -3.5542421e+01  -3.1265375e+00
   2.0753853e+01  -2.8671247e+01   5.0000000e+01  -2.5680276e+01  -3.7910312e+01  -1.5566594e+01
   2.0889134e+01  -2.8720262e+01   5.0000000e+01  -3.3751161e+01  -3.5036806e+01  -2.5488098e+01
   2.1026261e+01  -2.8765300e+01   5.0000000e+01  -4.0593402e+01  -2.9473105e+01  -3.0099789e+01
   2.1165080e+01  -2.8806309e+01   5.0000000e+01  -4.3843030e+01  -2.4624022e+01  -3.0476821e+01
   2.1305433e+01  -2.8843244e+01   5.0000000e+01  -4.2886705e+01  -2.2012324e+01  -3.0215481e+01
   2.1447160e+01  -2.8876060e+01   5.0000000e+01  -3.9292259e+01  -2.0703799e+01  -3.1717679e+01
   2.1590100e+01  -2.8904720e+01   5.0000000e+01  -3.4513732e+01  -1.9905753e+01  -3.4308029e+01
   2.1734090e+01  -2.8929190e+01   5.0000000e+01  -2.8658736e+01  -2.0718721e+01  -3.7591505e+01
   2.1878962e+01  -2.8949443e+01   5.0000000e+01  -2.1951291e+01  -2.3743785e+01  -4.3936566e+01
   2.2024552e+01  -2.8965454e+01   5.0000000e+01  -1.4940593e+01  -2.6116946e+01  -5.7057120e+01
   2.2170691e+01  -2.8977206e+01   5.0000000e+01  -7.5779625e+00  -1.9918138e+01  -7.6728698e+01
   2.2317210e+01  -2.8984684e+01   5.0000000e+01   7.0300605e-01   1.7853323e+00  -9.2633460e+01
   2.2463940e+01  -2.8987880e+01   5.0000000e+01   9.3531543e+00   3.4271200e+01  -9.0683138e+01
   2.2610713e+01  -2.8986789e+01   5.0000000e+01   1.5693871e+01   6.2742088e+01  -6.7452941e+01
   2.2757357e+01  -2.8981415e+01   5.0000000e+01   1.7102724e+01   7.5880495e+01  -3.3510438e+01
   2.2903704e+01  -2.8971761e+01   5.0000000e+01   1.3895164e+01   7.4732906e+01  -2.3307911e+00
   2.3049584e+01  -2.8957841e+01   5.0000000e+01   8.9178193e+00   6.6509334e+01   2.0565899e+01
   2.3194830e+01  -2.8939670e+01   5.0000000e+01   4.5290763e+00   5.5438845e+01   3.5199095e+01
   2.3339274e+01  -2.8917268e+01   5.0000000e+01   1.3459433e+00   4.4104218e+01   4.2194489e+01
   2.4096253e+01  -2.8862791e+01   5.0000000e+01  -8.2001867e+00   1.2796274e+01   4.0057087e+01
   2.4232789e+01  -2.8815636e+01   5.0000000e+01  -1.0467497e+01   1.0767376e+01   3.7110220e+01
   2.4367451e+01  -2.8764641e+01   5.0000000e+01  -1.1694530e+01   1.0839399e+01   3.4984457e+01
   2.4500096e+01  -2.8709861e+01   5.0000000e+01  -1.1922201e+01   1.1907809e+01   3.5086107e+01
   2.4630585e+01  -2.8651355e+01   5.0000000e+01  -1.1503719e+01   1.1943661e+01   3.7375602e+01
   2.4758781e+01  -2.8589188e+01   5.0000000e+01  -1.0749799e+01   9.7524297e+00   4.0073538e+01
   2.4884551e+01  -2.8523425e+01   5.0000000e+01  -9.6117000e+00   5.8525589e+00   4.1400248e+01
   2.5007765e+01  -2.8454138e+01   5.0000000e+01  -7.9202622e+00   1.4408136e+00   4.0850475e+01
   2.5128297e+01  -2.8381402e+01   5.0000000e+01  -5.6489332e+00  -2.7031833e+00   3.8791492e+01
   2.5246025e+01  -2.8305293e+01   5.0000000e+01  -2.7107666e+00  -6.0856759e+00   3.5704710e+01
   2.5360828e+01  -2.8225895e+01   5.0000000e+01   8.0952431e-01  -7.8883153e+00   3.2678847e+01
   2.5472593e+01  -2.8143290e+01   5.0000000e+01   3.7407879e+00  -7.8331533e+00   3.1563361e+01
   2.5581209e+01  -2.8057568e+01   5.0000000e+01   4.1798159e+00  -6.9416827e+00   3.2981754e+01
   2.5686569e+01  -2.7968819e+01   5.0000000e+01   1.0754617e+00  -6.3338125e+00   3.5344271e+01
   2.5788570e+01  -2.7877136e+01   5.0000000e+01  -5.1156867e+00  -6.1948662e+00   3.6218922e+01
   2.5887114e+01  -2.7782618e+01   5.0000000e+01  -1.2671463e+01  -5.9247606e+00   3.3840909e+01
   2.5982109e+01  -2.7685362e+01   5.0000000e+01  -1.9389032e+01  -4.7012710e+00   2.8086747e+01
   2.6073464e+01  -2.7585471e+01   5.0000000e+01  -2.3708432e+01  -2.1936809e+00   2.0285647e+01
   2.6161095e+01  -2.7483050e+01   5.0000000e+01  -2.4733454e+01   1.2634600e+00   1.2119950e+01
   2.6244923e+01  -2.7378205e+01   5.0000000e+01  -2.1905110e+01   5.0615509e+00   5.6142196e+00
   2.6324871e+01  -2.7271044e+01   5.0000000e+01  -1.6057434e+01   8.2953138e+00   3.1689831e+00
   2.6400870e+01  -2.7161679e+01   5.0000000e+01  -1.0012376e+01   9.9000087e+00   5.6498259e+00
   2.6472853e+01  -2.7050223e+01   5.0000000e+01  -6.7803745e+00   9.6162968e+00   1.1108350e+01
   2.6540758e+01  -2.6936789e+01   5.0000000e+01  -7.4120044e+00   8.1846460e+00   1.6452625e+01
   2.6604530e+01  -2.6821495e+01   5.0000000e+01  -1.0946713e+01   6.3914972e+00   1.9727272e+01
   2.6664117e+01  -2.6704458e+01   5.0000000e+01  -1.5918198e+01   4.5374457e+00   2.0491407e+01
   2.6719472e+01  -2.6585797e+01   5.0000000e+01  -2.1205692e+01   2.7618330e+00   1.8707054e+01
   2.6770551e+01  -2.6465632e+01   5.0000000e+01  -2.5689105e+01   1.5888131e+00   1.4394809e+01
   2.6817318e+01  -2.6344085e+01   5.0000000e+01  -2.8438800e+01   1.7445119e+00   8.3296109e+00
   2.6859740e+01  -2.6221278e+01   5.0000000e+01  -2.9249153e+01   3.4746659e+00   1.6182449e+00
   2.6897788e+01  -2.6097334e+01   5.0000000e+01  -2.8030282e+01   6.4868248e+00  -4.9598661e+00
   2.6931439e+01  -2.5972378e+01   5.0000000e+01  -2.4681084e+01   1.0072873e+01  -1.0142805e+01
   2.6960673e+01  -2.5846533e+01   5.0000000e+01  -2.0431500e+01   1.3166171e+01  -1.2406896e+01
   2.6985477e+01  -2.5719925e+01   5.0000000e+01  -1.7662771e+01   1.4824005e+01  -1.2025149e+01
   2.7005839e+01  -2.5592680e+01   5.0000000e+01  -1.7686838e+01   1.4421498e+01  -1.1261779e+01
   2.7021754e+01  -2.5464922e+01   5.0000000e+01  -1.9839677e+01   1.1573165e+01  -1.2596843e+01
   2.7033221e+01  -2.5336777e+01   5.0000000e+01  -2.1581766e+01   6.4898669e+00  -1.7559115e+01
   2.7040243e+01  -2.5208372e+01   5.0000000e+01  -1.9138913e+01   4.7482605e-02  -2.4614000e+01
   2.7042827e+01  -2.5079831e+01   5.0000000e+01  -1.1566131e+01  -6.6104640e+00  -2.8448786e+01
   2.7040984e+01  -2.4951279e+01   5.0000000e+01  -3.2502691e+00  -1.2382138e+01  -2.5497785e+01
   2.7034731e+01  -2.4822841e+01   5.0000000e+01   1.0018108e+00  -1.6738131e+01  -1.8107817e+01
   2.7024088e+01  -2.4694643e+01   5.0000000e+01   4.0423857e-01  -1.9868403e+01  -1.0691335e+01
   2.7009076e+01  -2.4566806e+01   5.0000000e+01  -3.3603255e+00  -2.1893893e+01  -5.8094467e+00
   2.6989726e+01  -2.4439455e+01   5.0000000e+01  -8.1365572e+00  -2.2476564e+01  -4.1972519e+00
   2.6966067e+01  -2.4312712e+01   5.0000000e+01  -1.2174671e+01  -2.1224624e+01  -4.9306956e+00
   2.6938135e+01  -2.4186697e+01   5.0000000e+01  -1.5260955e+01  -1.8048926e+01  -6.4374343e+00
   2.6905970e+01  -2.4061531e+01   5.0000000e+01  -1.8085928e+01  -1.3289427e+01  -8.3946831e+00
   2.6869613e+01  -2.3937333e+01   5.0000000e+01  -2.0565960e+01  -7.5349743e+00  -1.1547304e+01
   2.6829112e+01  -2.3814220e+01   5.0000000e+01  -2.1758422e+01  -1.3025664e+00  -1.6187353e+01
   2.6784515e+01  -2.3692310e+01   5.0000000e+01  -2.0937656e+01   5.0171483e+00  -2.1794972e+01
   2.6735876e+01  -2.3571717e+01   5.0000000e+01  -1.7780064e+01   1.0662913e+01  -2.7854188e+01
   2.6683251e+01  -2.3452554e+01   5.0000000e+01  -1.1732349e+01   1.3884779e+01  -3.3304302e+01
   2.6626700e+01  -2.3334934e+01   5.0000000e+01  -3.3067604e+00   1.3354200e+01  -3.5383207e+01
   2.6566286e+01  -2.3218967e+01   5.0000000e+01   4.6727161e+00   1.0495509e+01  -3.2412783e+01
   2.6502074e+01  -2.3104761e+01   5.0000000e+01   1.0036393e+01   7.9730763e+00  -2.6469105e+01
   2.6434133e+01  -2.2992422e+01   5.0000000e+01   1.3230299e+01   6.5194580e+00  -2.0018482e+01
   2.6362536e+01  -2.2882056e+01   5.0000000e+01   1.4707280e+01   5.4699715e+00  -1.3304267e+01
   2.6287357e+01  -2.2773764e+01   5.0000000e+01   1.3872008e+01   4.5111151e+00  -6.4745998e+00
   2.6208673e+01  -2.2667647e+01   5.0000000e+01   1.0620168e+01   3.5604915e+00  -6.6940727e-01
   2.6126565e+01  -2.2563803e+01   5.0000000e+01   5.8585192e+00   2.3462291e+00   2.9844349e+00
   2.6041115e+01  -2.2462328e+01   5.0000000e+01   1.0876519e+00   5.6336498e-01   4.2280962e+00
   2.5952409e+01  -2.2363316e+01   5.0000000e+01  -2.4416159e+00  -1.6462578e+00   3.8266242e+00
   2.5860534e+01  -2.2266857e+01   5.0000000e+01  -4.3054008e+00  -3.6665308e+00   2.6859771e+00
   2.5765580e+01  -2.2173041e+01   5.0000000e+01  -4.6374055e+00  -5.1230325e+00   1.2506486e+00
   2.5667641e+01  -2.2081952e+01   5.0000000e+01  -3.8609297e+00  -6.1478058e+00  -2.5125167e-01
   2.5566809e+01  -2.1993676e+01   5.0000000e+01  -2.4995152e+00  -7.0838082e+00  -1.6410553e+00
   2.5463183e+01  -2.1908291e+01   5.0000000e+01  -9.7544343e-01  -8.2257854e+00  -2.7382349e+00
   2.5356861e+01  -2.1825877e+01   5.0000000e+01   4.7622676e-01  -9.7203255e+00  -3.5042826e+00
   2.5247944e+01  -2.1746508e+01   5.0000000e+01   1.9814375e+00  -1.1789719e+01  -3.9173878e+00
   2.5136533e+01  -2.1670257e+01   5.0000000e+01   3.7316755e+00  -1.4495130e+01  -3.3472121e+00
   2.5022735e+01  -2.1597193e+01   5.0000000e+01   5.3828362e+00  -1.7079971e+01  -1.1850415e+00
   2.4906654e+01  -2.1527383e+01   5.0000000e+01   6.5141723e+00  -1.8589598e+01   1.9695036e+00
   2.4788398e+01  -2.1460889e+01   5.0000000e+01   7.3414488e+00  -1.8805928e+01   5.2158228e+00
   2.4668077e+01  -2.1397772e+01   5.0000000e+01   8.2125243e+00  -1.7625866e+01   8.4383111e+00
   2.4545802e+01  -2.1338090e+01   5.0000000e+01   8.9773359e+00  -1.4669359e+01   1.1421539e+01
   2.4421685e+01  -2.1281896e+01   5.0000000e+01   9.1406902e+00  -1.0137955e+01   1.3247455e+01
   2.4295839e+01  -2.1229241e+01   5.0000000e+01   8.4587542e+00  -5.1548868e+00   1.3088053e+01
   2.4168379e+01  -2.1180172e+01   5.0000000e+01   7.3624185e+00  -1.1054153e+00   1.1115284e+01
   2.4039421e+01  -2.1134735e+01   5.0000000e+01   6.4351268e+00   1.2216906e+00   8.3807226e+00
   2.3909081e+01  -2.1092970e+01   5.0000000e+01   5.8301535e+00   1.8344273e+00   5.7664482e+00
   2.3777478e+01  -2.1054914e+01   5.0000000e+01   5.3967550e+00   1.0362460e+00   3.6340493e+00
   2.3644730e+01  -2.1020603e+01   5.0000000e+01   4.7163005e+00  -7.4141724e-01   2.3411558e+00
   2.3510958e+01  -2.0990066e+01   5.0000000e+01   3.2069362e+00  -2.6255373e+00   2.1702633e+00
   2.3376280e+01  -2.0963332e+01   5.0000000e+01   6.2474629e-01  -3.5790215e+00   2.5059544e+00
   2.3240818e+01  -2.0940424e+01   5.0000000e+01  -2.6245406e+00  -3.5715285e+00   1.9723481e+00
   2.3104694e+01  -2.0921363e+01   5.0000000e+01  -5.8015553e+00  -3.7124423e+00   5.0588286e-02
   2.2968029e+01  -2.0906167e+01   5.0000000e+01  -8.4699398e+00  -4.7423202e+00  -2.4747215e+00
   2.2830946e+01  -2.0894848e+01   5.0000000e+01  -1.0542447e+01  -6.3353929e+00  -4.8353030e+00
   2.2693567e+01  -2.0887418e+01   5.0000000e+01  -1.1907283e+01  -7.8485100e+00  -7.0647894e+00
   2.2556015e+01  -2.0883882e+01   5.0000000e+01  -1.2481194e+01  -9.2920091e+00  -9.5577109e+00
   2.2418413e+01  -2.0884244e+01   5.0000000e+01  -1.2438749e+01  -1.1287844e+01  -1.2044114e+01
   2.2280884e+01  -2.0888504e+01   5.0000000e+01  -1.2204299e+01  -1.3883828e+01  -1.3745823e+01
   2.2143550e+01  -2.0896658e+01   5.0000000e+01  -1.2267120e+01  -1.6584694e+01  -1.4592257e+01
   2.2006536e+01  -2.0908698e+01   5.0000000e+01  -1.2902871e+01  -1.9351500e+01  -1.4921824e+01
   2.1869962e+01  -2.0924614e+01   5.0000000e+01  -1.4004958e+01  -2.2361480e+01  -1.4640744e+01
   2.1733952e+01  -2.0944391e+01   5.0000000e+01  -1.5180381e+01  -2.5570831e+01  -1.3478228e+01
   2.1598626e+01  -2.0968012e+01   5.0000000e+01  -1.6010549e+01  -2.8849792e+01  -1.1189677e+01
   2.1464108e+01  -2.0995455e+01   5.0000000e+01  -1.6211215e+01  -3.1944939e+01  -7.4116769e+00
   2.1330516e+01  -2.1026695e+01   5.0000000e+01  -1.5578339e+01  -3.4145844e+01  -1.7884365e+00
   2.1197972e+01  -2.1061705e+01   5.0000000e+01  -1.4015208e+01  -3.4117313e+01   5.2459260e+00
   2.1066595e+01  -2.1100453e+01   5.0000000e+01  -1.1707971e+01  -3.0920930e+01   1.1816291e+01
   2.0936503e+01  -2.1142903e+01   5.0000000e+01  -9.1721827e+00  -2.5423752e+01   1.5749838e+01
   2.0807815e+01  -2.1189019e+01   5.0000000e+01  -7.1112501e+00  -1.9798067e+01   1.6635442e+01
   2.0680646e+01  -2.1238757e+01   5.0000000e+01  -5.9694185e+00  -1.5514467e+01   1.6069448e+01
   2.0555112e+01  -2.1292074e+01   5.0000000e+01  -5.5475755e+00  -1.2430669e+01   1.5784455e+01
   2.0431329e+01  -2.1348920e+01   5.0000000e+01  -5.3421142e+00  -9.7419090e+00   1.6166759e+01
   2.0309409e+01  -2.1409245e+01   5.0000000e+01  -5.0254013e+00  -7.1038226e+00   1.6655959e+01
   2.0189464e+01  -2.1472994e+01   5.0000000e+01  -4.4768945e+00  -4.6573209e+00   1.6776636e+01
   2.0071604e+01  -2.1540108e+01   5.0000000e+01  -3.7294328e+00  -2.5403197e+00   1.6427133e+01
   1.9955939e+01  -2.1610529e+01   5.0000000e+01  -2.9350236e+00  -7.3158756e-01   1.5684101e+01
   1.9842576e+01  -2.1684190e+01   5.0000000e+01  -2.3338007e+00   9.6599789e-01   1.4651118e+01
   1.9731622e+01  -2.1761026e+01   5.0000000e+01  -2.2592160e+00   2.8135751e+00   1.3339220e+01
   1.9623179e+01  -2.1840966e+01   5.0000000e+01  -3.0135539e+00   4.7751536e+00   1.1817498e+01
   1.9517350e+01  -2.1923938e+01   5.0000000e+01  -4.6416500e+00   6.5832538e+00   1.0488242e+01
   1.9414236e+01  -2.2009866e+01   5.0000000e+01  -6.7924670e+00   8.1093631e+00   9.9031954e+00
   1.9313935e+01  -2.2098672e+01   5.0000000e+01  -8.8023920e+00   9.4687243e+00   1.0335698e+01
   1.9216543e+01  -2.2190274e+01   5.0000000e+01  -1.0075951e+01   1.0891445e+01   1.1537157e+01
   1.9122155e+01  -2.2284588e+01   5.0000000e+01  -1.0441720e+01   1.2408513e+01   1.2987059e+01
   1.9030862e+01  -2.2381528e+01   5.0000000e+01  -1.0011589e+01   1.3810194e+01   1.4349645e+01
   1.8942755e+01  -2.2481005e+01   5.0000000e+01  -8.9422422e+00   1.4849727e+01   1.5473040e+01
   1.8857919e+01  -2.2582927e+01   5.0000000e+01  -7.4087373e+00   1.5287005e+01   1.6343632e+01
   1.8776441e+01  -2.2687201e+01   5.0000000e+01  -5.4948568e+00   1.4993917e+01   1.7065859e+01
   1.8698403e+01  -2.2793729e+01   5.0000000e+01  -3.2794190e+00   1.4003190e+01   1.7677769e+01
   1.8623884e+01  -2.2902414e+01   5.0000000e+01  -9.7600368e-01   1.2492686e+01   1.8252519e+01
   1.8552961e+01  -2.3013155e+01   5.0000000e+01   1.2621425e+00   1.0773058e+01   1.8903509e+01
   1.8485708e+01  -2.3125849e+01   5.0000000e+01   3.3979144e+00   9.1054047e+00   1.9592386e+01
   1.8422197e+01  -2.3240390e+01   5.0000000e+01   5.3575105e+00   7.6465045e+00   2.0180203e+01
   1.8362495e+01  -2.3356673e+01   5.0000000e+01   6.9639128e+00   6.5073487e+00   2.0566592e+01
   1.8306669e+01  -2.3474588e+01   5.0000000e+01   8.0636501e+00   5.7726958e+00   2.0781131e+01
   1.8254781e+01  -2.3594025e+01   5.0000000e+01   8.6830064e+00   5.5230343e+00   2.0835322e+01
   1.8206889e+01  -2.3714872e+01   5.0000000e+01   8.8444674e+00   5.7132489e+00   2.0619501e+01
   1.8163049e+01  -2.3837014e+01   5.0000000e+01   8.4775563e+00   6.1159949e+00   2.0214309e+01
   1.8123314e+01  -2.3960337e+01   5.0000000e+01   7.6956595e+00   6.4385313e+00   1.9923651e+01
   1.8087733e+01  -2.4084724e+01   5.0000000e+01   6.7781953e+00   6.3702740e+00   1.9912857e+01
   1.8056352e+01  -2.4210057e+01   5.0000000e+01   5.8518595e+00   5.6243780e+00   2.0251937e+01
   1.8029211e+01  -2.4336217e+01   5.0000000e+01   4.9374113e+00   4.1167738e+00   2.1263748e+01
   1.8006351e+01  -2.4463082e+01   5.0000000e+01   4.3624907e+00   2.1228259e+00   2.3405038e+01
   1.7987804e+01  -2.4590533e+01   5.0000000e+01   4.8408219e+00   1.7858208e-01   2.6545746e+01
   1.7973603e+01  -2.4718446e+01   5.0000000e+01   6.6956497e+00  -1.2459696e+00   2.9529498e+01
   1.7963774e+01  -2.4846698e+01   5.0000000e+01   9.0568583e+00  -2.0225005e+00   3.1153247e+01
   1.7958339e+01  -2.4975166e+01   5.0000000e+01   1.0661916e+01  -2.2630898e+00   3.1605854e+01
   1.7957318e+01  -2.5103725e+01   5.0000000e+01   1.1426017e+01  -2.0086273e+00   3.2018704e+01
   1.7960726e+01  -2.5232251e+01   5.0000000e+01   1.2365230e+01  -1.2386642e+00   3.2748552e+01
   1.7968574e+01  -2.5360618e+01   5.0000000e+01   1.4165952e+01  -1.2331766e-01   3.2914914e+01
   1.7980868e+01  -2.5488700e+01   5.0000000e+01   1.6447873e+01   9.1464404e-01   3.1466481e+01
   1.7997609e+01  -2.5616372e+01   5.0000000e+01   1.8269604e+01   1.4220372e+00   2.8086511e+01
   1.8018797e+01  -2.5743509e+01   5.0000000e+01   1.8724804e+01   1.2012029e+00   2.3209651e+01
   1.8044425e+01  -2.5869984e+01   5.0000000e+01   1.7280395e+01   2.9357550e-01   1.7847457e+01
   1.8074481e+01  -2.5995673e+01   5.0000000e+01   1.4123889e+01  -1.1938044e+00   1.3021037e+01
   1.8108951e+01  -2.6120450e+01   5.0000000e+01   9.7888916e+00  -3.0466511e+00   9.2357122e+00
   1.8147814e+01  -2.6244192e+01   5.0000000e+01   4.8270966e+00  -4.9965597e+00   6.7582309e+00
   1.8191046e+01  -2.6366774e+01   5.0000000e+01  -1.3264724e-01  -6.7839149e+00   5.5041461e+00
   1.8238617e+01  -2.6488074e+01   5.0000000e+01  -4.8487066e+00  -7.9960742e+00   5.2128075e+00
   1.8290494e+01  -2.6607968e+01   5.0000000e+01  -9.2862414e+00  -8.3864119e+00   6.1153780e+00
   1.8346639e+01  -2.6726337e+01   5.0000000e+01  -1.3296433e+01  -8.2331869e+00   8.6066297e+00
   1.8407007e+01  -2.6843059e+01   5.0000000e+01  -1.6622895e+01  -8.0194812e+00   1.3202408e+01
   1.8471551e+01  -2.6958016e+01   5.0000000e+01  -1.8193925e+01  -8.1647444e+00   2.0082961e+01
   1.8540219e+01  -2.7071091e+01   5.0000000e+01  -1.6840926e+01  -8.7882375e+00   2.7864683e+01
   1.8612953e+01  -2.7182167e+01   5.0000000e+01  -1.2839989e+01  -9.6949584e+00   3.4585117e+01
   1.8689691e+01  -2.7291131e+01   5.0000000e+01  -7.3443613e+00  -1.0919588e+01   3.9207980e+01
   1.8770366e+01  -2.7397869e+01   5.0000000e+01  -1.2949778e+00  -1.2663689e+01   4.1317050e+01
   1.8854906e+01  -2.7502272e+01   5.0000000e+01   4.6236520e+00  -1.4783519e+01   4.0686165e+01
   1.8943236e+01  -2.7604231e+01   5.0000000e+01   9.7417811e+00  -1.6850458e+01   3.7413586e+01
   1.9035274e+01  -2.7703640e+01   5.0000000e+01   1.3504846e+01  -1.8428601e+01   3.1952307e+01
   1.9130935e+01  -2.7800395e+01   5.0000000e+01   1.5549559e+01  -1.9086829e+01   2.4906563e+01
   1.9230129e+01  -2.7894394e+01   5.0000000e+01   1.5613880e+01  -1.8442606e+01   1.7146640e+01
   1.9332762e+01  -2.7985538e+01   5.0000000e+01   1.3762628e+01  -1.6414114e+01   9.6975404e+00
   1.9438735e+01  -2.8073732e+01   5.0000000e+01   1.0237672e+01  -1.3052822e+01   3.2965692e+00
   1.9547944e+01  -2.8158881e+01   5.0000000e+01   5.1770235e+00  -8.4330711e+00  -1.1847674e+00
   1.9660282e+01  -2.8240897e+01   5.0000000e+01  -1.0309762e+00  -3.2509974e+00  -2.5037447e+00
   1.9775638e+01  -2.8319690e+01   5.0000000e+01  -7.2984530e+00   9.0160320e-01   1.1948626e-01
   1.9893896e+01  -2.8395178e+01   5.0000000e+01  -1.1827771e+01   2.1626016e+00   5.8011343e+00
   2.0014936e+01  -2.8467279e+01   5.0000000e+01  -1.3464598e+01  -3.5985169e-01   1.1680495e+01
   2.0138635e+01  -2.8535917e+01   5.0000000e+01  -1.3178366e+01  -5.9427317e+00   1.4807520e+01
   2.0264866e+01  -2.8601016e+01   5.0000000e+01  -1.3225410e+01  -1.3092139e+01   1.4152551e+01
   2.0393498e+01  -2.8662508e+01   5.0000000e+01  -1.5273080e+01  -2.0545392e+01   1.0273927e+01
   2.0524398e+01  -2.8720326e+01   5.0000000e+01  -1.9792647e+01  -2.7099456e+01   3.9212575e+00
   2.0657429e+01  -2.8774407e+01   5.0000000e+01  -2.6438482e+01  -3.0934061e+01  -3.8178009e+00
   2.0792450e+01  -2.8824692e+01   5.0000000e+01  -3.3980452e+01  -3.0775752e+01  -1.0456775e+01
   2.0929318e+01  -2.8871127e+01   5.0000000e+01  -4.0266119e+01  -2.7921765e+01  -1.3659800e+01
   2.1067889e+01  -2.8913662e+01   5.0000000e+01  -4.3444330e+01  -2.5293428e+01  -1.4033319e+01
   2.1208013e+01  -2.8952250e+01   5.0000000e+01  -4.3452015e+01  -2.4447122e+01  -1.4673136e+01
   2.1349541e+01  -2.8986849e+01   5.0000000e+01  -4.1861665e+01  -2.4491116e+01  -1.7541504e+01
   2.1492320e+01  -2.9017421e+01   5.0000000e+01  -3.9834028e+01  -2.4539978e+01  -2.1661815e+01
   2.1636196e+01  -2.9043932e+01   5.0000000e+01  -3.6994718e+01  -2.5585555e+01  -2.6198522e+01
   2.1781013e+01  -2.9066355e+01   5.0000000e+01  -3.2842328e+01  -2.8396091e+01  -3.2654747e+01
   2.1926614e+01  -2.9084663e+01   5.0000000e+01  -2.8143652e+01  -3.1899203e+01  -4.3584365e+01
   2.2072840e+01  -2.9098837e+01   5.0000000e+01  -2.4050812e+01  -3.2341782e+01  -6.1308379e+01
   2.2219533e+01  -2.9108862e+01   5.0000000e+01  -1.9552999e+01  -2.2602329e+01  -8.3803778e+01
   2.2366531e+01  -2.9114726e+01   5.0000000e+01  -1.1971266e+01   2.1192225e+00  -1.0058984e+02
   2.2513676e+01  -2.9116423e+01   5.0000000e+01  -1.4645303e+00   3.5995675e+01  -9.8588928e+01
   2.2660805e+01  -2.9113951e+01   5.0000000e+01   8.2516429e+00   6.4327854e+01  -7.4831825e+01
   2.2807759e+01  -2.9107313e+01   5.0000000e+01   1.4109254e+01   7.6647437e+01  -4.0307354e+01
   2.2954377e+01  -2.9096516e+01   5.0000000e+01   1.5819253e+01   7.4753216e+01  -8.3798496e+00
   2.3100500e+01  -2.9081572e+01   5.0000000e+01   1.4667402e+01   6.5504597e+01   1.5429552e+01
   2.3245967e+01  -2.9062498e+01   5.0000000e+01   1.1949568e+01   5.3518649e+01   3.0648038e+01
   2.3390621e+01  -2.9039314e+01   5.0000000e+01   8.5546424e+00   4.2179397e+01   3.8338754e+01
   2.3534304e+01  -2.9012045e+01   5.0000000e+01   5.0902432e+00   3.3531735e+01   4.1365647e+01
   2.3676862e+01  -2.8980722e+01   5.0000000e+01   1.7074460e+00   2.7194688e+01   4.2569464e+01
   2.3818141e+01  -2.8945379e+01   5.0000000e+01  -1.7282252e+00   2.1820603e+01   4.3007969e+01
   2.3957988e+01  -2.8906054e+01   5.0000000e+01  -5.1493815e+00   1.6794891e+01   4.2286737e+01
   2.4700234e+01  -2.8764147e+01   5.0000000e+01  -8.2429659e+00   8.3452338e+00   4.3041316e+01
   2.4828699e+01  -2.8701863e+01   5.0000000e+01  -7.1935888e+00   4.5023338e+00   4.4731607e+01
   2.4954798e+01  -2.8636081e+01   5.0000000e+01  -6.0125792e+00  -4.3386599e-01   4.4395680e+01
   2.5078409e+01  -2.8566866e+01   5.0000000e+01  -4.6059246e+00  -5.1565943e+00   4.1937763e+01
   2.5199411e+01  -2.8494290e+01   5.0000000e+01  -3.0501596e+00  -9.0727982e+00   3.7946073e+01
   2.5317689e+01  -2.8418426e+01   5.0000000e+01  -1.1750142e+00  -1.1878033e+01   3.2632090e+01
   2.5433129e+01  -2.8339351e+01   5.0000000e+01   1.5992183e+00  -1.2586305e+01   2.6983639e+01
   2.5545622e+01  -2.8257145e+01   5.0000000e+01   4.9396200e+00  -1.0921133e+01   2.3639376e+01
   2.5655063e+01  -2.8171890e+01   5.0000000e+01   7.1117089e+00  -8.4016071e+00   2.4204951e+01
   2.5761351e+01  -2.8083672e+01   5.0000000e+01   6.4862438e+00  -6.5838280e+00   2.7547938e+01
   2.5864388e+01  -2.7992580e+01   5.0000000e+01   2.6298454e+00  -5.8364689e+00   3.1273511e+01
   2.5964080e+01  -2.7898703e+01   5.0000000e+01  -3.6210721e+00  -5.6291502e+00   3.3114203e+01
   2.6060338e+01  -2.7802136e+01   5.0000000e+01  -1.0493953e+01  -4.8825814e+00   3.1937126e+01
   2.6153076e+01  -2.7702974e+01   5.0000000e+01  -1.6336823e+01  -2.8598417e+00   2.8289971e+01
   2.6242214e+01  -2.7601315e+01   5.0000000e+01  -2.0220071e+01   1.7388228e-01   2.3259252e+01
   2.6327675e+01  -2.7497260e+01   5.0000000e+01  -2.1318520e+01   3.5456862e+00   1.7744037e+01
   2.6409385e+01  -2.7390910e+01   5.0000000e+01  -1.9071677e+01   6.5614294e+00   1.3226386e+01
   2.6487277e+01  -2.7282370e+01   5.0000000e+01  -1.4409429e+01   8.4497154e+00   1.1372571e+01
   2.6561286e+01  -2.7171746e+01   5.0000000e+01  -9.7446637e+00   8.9914728e+00   1.2590645e+01
   2.6631354e+01  -2.7059144e+01   5.0000000e+01  -7.5320121e+00   8.7054818e+00   1.5782187e+01
   2.6697424e+01  -2.6944675e+01   5.0000000e+01  -8.8070906e+00   8.0516567e+00   1.9037814e+01
   2.6759446e+01  -2.6828448e+01   5.0000000e+01  -1.2850702e+01   7.0387023e+00   2.0712399e+01
   2.6817373e+01  -2.6710576e+01   5.0000000e+01  -1.8167111e+01   5.5015202e+00   2.0002864e+01
   2.6871163e+01  -2.6591172e+01   5.0000000e+01  -2.3164708e+01   3.7711210e+00   1.6690572e+01
   2.6920779e+01  -2.6470349e+01   5.0000000e+01  -2.6466575e+01   2.8273100e+00   1.1432079e+01
   2.6966186e+01  -2.6348224e+01   5.0000000e+01  -2.7630430e+01   3.3325928e+00   5.6256700e+00
   2.7007356e+01  -2.6224910e+01   5.0000000e+01  -2.6960627e+01   5.3111599e+00   3.0069440e-01
   2.7044263e+01  -2.6100527e+01   5.0000000e+01  -2.4749505e+01   8.5538710e+00  -3.9231323e+00
   2.7076887e+01  -2.5975189e+01   5.0000000e+01  -2.1449330e+01   1.2310014e+01  -6.2857000e+00
   2.7105211e+01  -2.5849016e+01   5.0000000e+01  -1.8284195e+01   1.5427199e+01  -6.2416696e+00
   2.7129222e+01  -2.5722126e+01   5.0000000e+01  -1.7175414e+01   1.7164693e+01  -4.4657740e+00
   2.7148913e+01  -2.5594636e+01   5.0000000e+01  -1.9341111e+01   1.7090874e+01  -3.3183917e+00
   2.7164279e+01  -2.5466666e+01   5.0000000e+01  -2.3810044e+01   1.4862637e+01  -5.7308311e+00
   2.7175320e+01  -2.5338334e+01   5.0000000e+01  -2.7299154e+01   1.0721247e+01  -1.3164243e+01
   2.7182040e+01  -2.5209758e+01   5.0000000e+01  -2.5780366e+01   5.2831883e+00  -2.3484035e+01
   2.7184445e+01  -2.5081057e+01   5.0000000e+01  -1.8255320e+01  -1.0657121e+00  -3.1023731e+01
   2.7182549e+01  -2.4952349e+01   5.0000000e+01  -8.9052583e+00  -7.6236280e+00  -3.1470789e+01
   2.7176365e+01  -2.4823752e+01   5.0000000e+01  -3.0687670e+00  -1.3177024e+01  -2.6284605e+01
   2.7165913e+01  -2.4695383e+01   5.0000000e+01  -2.2576856e+00  -1.7119582e+01  -2.0197210e+01
   2.7151215e+01  -2.4567359e+01   5.0000000e+01  -4.5207305e+00  -1.9479721e+01  -1.6368617e+01
   2.7132298e+01  -2.4439796e+01   5.0000000e+01  -7.2984924e+00  -1.9974446e+01  -1.5238720e+01
   2.7109191e+01  -2.4312809e+01   5.0000000e+01  -9.1468194e+00  -1.8334922e+01  -1.5568728e+01
   2.7081927e+01  -2.4186513e+01   5.0000000e+01  -1.0350112e+01  -1.4891059e+01  -1.5966815e+01
   2.7050544e+01  -2.4061021e+01   5.0000000e+01  -1.1850882e+01  -1.0207320e+01  -1.6437833e+01
   2.7015080e+01  -2.3936446e+01   5.0000000e+01  -1.3506768e+01  -4.7262753e+00  -1.7885508e+01
   2.6975579e+01  -2.3812898e+01   5.0000000e+01  -1.4228106e+01   1.2073106e+00  -2.0384970e+01
   2.6932088e+01  -2.3690489e+01   5.0000000e+01  -1.3383502e+01   7.1970430e+00  -2.2950173e+01
   2.6884655e+01  -2.3569327e+01   5.0000000e+01  -1.1351171e+01   1.2587305e+01  -2.4865924e+01
   2.6833334e+01  -2.3449519e+01   5.0000000e+01  -8.4226974e+00   1.6132837e+01  -2.6617090e+01
   2.6778179e+01  -2.3331172e+01   5.0000000e+01  -3.9285182e+00   1.6364077e+01  -2.8257589e+01
   2.6719250e+01  -2.3214390e+01   5.0000000e+01   2.0527709e+00   1.3429462e+01  -2.7952358e+01
   2.6656606e+01  -2.3099276e+01   5.0000000e+01   7.7166350e+00   9.6151946e+00  -2.4441108e+01
   2.6590313e+01  -2.2985930e+01   5.0000000e+01   1.1615055e+01   6.9051088e+00  -1.8720802e+01
   2.6520437e+01  -2.2874454e+01   5.0000000e+01   1.3327834e+01   5.4524555e+00  -1.2145527e+01
   2.6447046e+01  -2.2764942e+01   5.0000000e+01   1.2382019e+01   4.5514510e+00  -5.6120465e+00
   2.6370214e+01  -2.2657493e+01   5.0000000e+01   8.6299737e+00   3.6116196e+00  -1.8258332e-01
   2.6290014e+01  -2.2552199e+01   5.0000000e+01   2.8792527e+00   2.2906665e+00   3.0506423e+00
   2.6206523e+01  -2.2449151e+01   5.0000000e+01  -3.2279776e+00   2.9389186e-01   3.5008402e+00
   2.6119820e+01  -2.2348440e+01   5.0000000e+01  -7.8466830e+00  -2.5067712e+00   1.8153424e+00
   2.6029986e+01  -2.2250152e+01   5.0000000e+01  -1.0104121e+01  -5.6349211e+00  -4.3287027e-01
   2.5937105e+01  -2.2154373e+01   5.0000000e+01  -1.0308324e+01  -8.2922987e+00  -2.1609689e+00
   2.5841262e+01  -2.2061186e+01   5.0000000e+01  -9.1477650e+00  -1.0021710e+01  -3.1855183e+00
   2.5742546e+01  -2.1970670e+01   5.0000000e+01  -7.2965013e+00  -1.0854398e+01  -3.7458603e+00
   2.5641045e+01  -2.1882904e+01   5.0000000e+01  -5.3153411e+00  -1.1189692e+01  -4.1608318e+00
   2.5536852e+01  -2.1797963e+01   5.0000000e+01  -3.5590803e+00  -1.1552942e+01  -4.6075442e+00
   2.5430060e+01  -2.1715921e+01   5.0000000e+01  -2.0758150e+00  -1.2365328e+01  -5.1295248e+00
   2.5320763e+01  -2.1636847e+01   5.0000000e+01  -5.6600256e-01  -1.3977027e+01  -5.4902864e+00
   2.5209060e+01  -2.1560809e+01   5.0000000e+01   1.1261899e+00  -1.6413170e+01  -4.9319623e+00
   2.5095048e+01  -2.1487873e+01   5.0000000e+01   2.6952604e+00  -1.8942153e+01  -2.9358205e+00
   2.4978827e+01  -2.1418100e+01   5.0000000e+01   4.0459164e+00  -2.0652833e+01   2.4022838e-02
   2.4860499e+01  -2.1351551e+01   5.0000000e+01   5.5687913e+00  -2.1239287e+01   3.4173344e+00
   2.4740167e+01  -2.1288282e+01   5.0000000e+01   7.3604732e+00  -2.0504703e+01   7.3873039e+00
   2.4617936e+01  -2.1228348e+01   5.0000000e+01   8.9524662e+00  -1.7849648e+01   1.1736179e+01
   2.4493910e+01  -2.1171798e+01   5.0000000e+01   9.8120526e+00  -1.2981870e+01   1.5159121e+01
   2.4368197e+01  -2.1118682e+01   5.0000000e+01   9.6762551e+00  -6.8805156e+00   1.6124393e+01
   2.4240904e+01  -2.1069044e+01   5.0000000e+01   8.6169859e+00  -1.5065167e+00   1.4412340e+01
   2.4112140e+01  -2.1022927e+01   5.0000000e+01   6.9215362e+00   1.7368659e+00   1.1244428e+01
   2.3982015e+01  -2.0980369e+01   5.0000000e+01   5.0149882e+00   2.7006834e+00   7.9629867e+00
   2.3850640e+01  -2.0941408e+01   5.0000000e+01   3.3863434e+00   1.9750321e+00   5.4334024e+00
   2.3718127e+01  -2.0906075e+01   5.0000000e+01   2.0962632e+00   5.1582853e-01   4.0506261e+00
   2.3584587e+01  -2.0874402e+01   5.0000000e+01   5.4708384e-01  -7.5067219e-01   3.5652454e+00
   2.3450134e+01  -2.0846414e+01   5.0000000e+01  -1.8007532e+00  -1.2586062e+00   3.1871158e+00
   2.3314881e+01  -2.0822136e+01   5.0000000e+01  -4.7344987e+00  -1.0660926e+00   1.8821110e+00
   2.3178943e+01  -2.0801588e+01   5.0000000e+01  -7.5844796e+00  -1.0506796e+00  -7.8183203e-01
   2.3042434e+01  -2.0784787e+01   5.0000000e+01  -9.8569889e+00  -2.0476792e+00  -4.1022533e+00
   2.2905469e+01  -2.0771748e+01   5.0000000e+01  -1.1308784e+01  -4.0484039e+00  -7.0522840e+00
   2.2768162e+01  -2.0762482e+01   5.0000000e+01  -1.1822034e+01  -6.4391663e+00  -9.0406212e+00
   2.2630631e+01  -2.0756996e+01   5.0000000e+01  -1.1521635e+01  -8.6045727e+00  -1.0256756e+01
   2.2492990e+01  -2.0755296e+01   5.0000000e+01  -1.0800666e+01  -1.0660582e+01  -1.1318608e+01
   2.2355354e+01  -2.0757382e+01   5.0000000e+01  -1.0079538e+01  -1.3012983e+01  -1.2270067e+01
   2.2217840e+01  -2.0763253e+01   5.0000000e+01  -9.5773051e+00  -1.5436613e+01  -1.2993500e+01
   2.2080563e+01  -2.0772904e+01   5.0000000e+01  -9.3632275e+00  -1.7759641e+01  -1.3837029e+01
   2.1943639e+01  -2.0786326e+01   5.0000000e+01  -9.4900337e+00  -2.0377931e+01  -1.4848432e+01
   2.1807183e+01  -2.0803510e+01   5.0000000e+01  -9.8445773e+00  -2.3650924e+01  -1.5493126e+01
   2.1671309e+01  -2.0824438e+01   5.0000000e+01  -1.0040794e+01  -2.7567673e+01  -1.5089994e+01
   2.1536133e+01  -2.0849095e+01   5.0000000e+01  -9.7551766e+00  -3.1757590e+01  -1.3075321e+01
   2.1401768e+01  -2.0877460e+01   5.0000000e+01  -8.9740844e+00  -3.5624502e+01  -8.9925188e+00
   2.1268327e+01  -2.0909507e+01   5.0000000e+01  -7.7082152e+00  -3.8117570e+01  -2.5536455e+00
   2.1135925e+01  -2.0945211e+01   5.0000000e+01  -5.7945151e+00  -3.7755012e+01   5.3738790e+00
   2.1004672e+01  -2.0984540e+01   5.0000000e+01  -3.1894558e+00  -3.4061499e+01   1.2461861e+01
   2.0874681e+01  -2.1027462e+01   5.0000000e+01  -2.7888739e-01  -2.8421360e+01   1.6706244e+01
   2.0746062e+01  -2.1073939e+01   5.0000000e+01   2.1581230e+00  -2.2866006e+01   1.7967427e+01
   2.0618925e+01  -2.1123933e+01   5.0000000e+01   3.4270118e+00  -1.8512813e+01   1.7643006e+01
   2.0493378e+01  -2.1177402e+01   5.0000000e+01   3.4760601e+00  -1.5159187e+01   1.7205540e+01
   2.0369531e+01  -2.1234298e+01   5.0000000e+01   2.8067962e+00  -1.2197354e+01   1.7080470e+01
   2.0247488e+01  -2.1294575e+01   5.0000000e+01   2.0183578e+00  -9.5555772e+00   1.7056002e+01
   2.0127355e+01  -2.1358180e+01   5.0000000e+01   1.5821184e+00  -7.3783764e+00   1.7057619e+01
   2.0009238e+01  -2.1425060e+01   5.0000000e+01   1.6451011e+00  -5.5546508e+00   1.7033406e+01
   1.9893237e+01  -2.1495158e+01   5.0000000e+01   2.0396680e+00  -3.9082686e+00   1.6900997e+01
   1.9779456e+01  -2.1568413e+01   5.0000000e+01   2.6007034e+00  -2.1778998e+00   1.6566186e+01
   1.9667993e+01  -2.1644763e+01   5.0000000e+01   3.0913001e+00  -1.0177043e-01   1.5616812e+01
   1.9558947e+01  -2.1724142e+01   5.0000000e+01   3.0113127e+00   2.1601861e+00   1.3733518e+01
   1.9452415e+01  -2.1806483e+01   5.0000000e+01   1.9366904e+00   4.2202226e+00   1.1281379e+01
   1.9348492e+01  -2.1891715e+01   5.0000000e+01  -1.3373395e-01   5.8380279e+00   9.0437920e+00
   1.9247271e+01  -2.1979765e+01   5.0000000e+01  -2.6576135e+00   6.9966068e+00   7.7684530e+00
   1.9148843e+01  -2.2070556e+01   5.0000000e+01  -4.7676431e+00   7.9878365e+00   7.6285156e+00
   1.9053298e+01  -2.2164012e+01   5.0000000e+01  -6.0008110e+00   9.0695172e+00   8.0839882e+00
   1.8960724e+01  -2.2260050e+01   5.0000000e+01  -6.4597385e+00   1.0142419e+01   8.6553837e+00
   1.8871205e+01  -2.2358588e+01   5.0000000e+01  -6.3351289e+00   1.0998146e+01   9.2187870e+00
   1.8784825e+01  -2.2459542e+01   5.0000000e+01  -5.8165779e+00   1.1425641e+01   9.7893792e+00
   1.8701666e+01  -2.2562822e+01   5.0000000e+01  -5.0201741e+00   1.1248619e+01   1.0565288e+01
   1.8621805e+01  -2.2668340e+01   5.0000000e+01  -3.8701294e+00   1.0494795e+01   1.1709624e+01
   1.8545320e+01  -2.2776004e+01   5.0000000e+01  -2.3351333e+00   9.3777648e+00   1.3155094e+01
   1.8472284e+01  -2.2885720e+01   5.0000000e+01  -5.4525048e-01   8.1878343e+00   1.4724148e+01
   1.8402770e+01  -2.2997391e+01   5.0000000e+01   1.3354786e+00   7.1325563e+00   1.6248566e+01
   1.8336845e+01  -2.3110921e+01   5.0000000e+01   3.2378152e+00   6.3225531e+00   1.7622096e+01
   1.8274577e+01  -2.3226210e+01   5.0000000e+01   5.0907085e+00   5.8914840e+00   1.8692030e+01
   1.8216029e+01  -2.3343157e+01   5.0000000e+01   6.6658115e+00   5.9172851e+00   1.9345754e+01
   1.8161262e+01  -2.3461657e+01   5.0000000e+01   7.8004736e+00   6.3792143e+00   1.9629562e+01
   1.8110335e+01  -2.3581608e+01   5.0000000e+01   8.4989213e+00   7.1646808e+00   1.9508176e+01
   1.8063301e+01  -2.3702902e+01   5.0000000e+01   8.6941554e+00   8.0333002e+00   1.8903845e+01
   1.8020214e+01  -2.3825432e+01   5.0000000e+01   8.2537659e+00   8.7431057e+00   1.7999330e+01
   1.7981122e+01  -2.3949089e+01   5.0000000e+01   7.1961972e+00   9.0800791e+00   1.7205857e+01
   1.7946072e+01  -2.4073763e+01   5.0000000e+01   5.7422838e+00   8.7727011e+00   1.6926369e+01
   1.7915107e+01  -2.4199342e+01   5.0000000e+01   4.1677918e+00   7.6529753e+00   1.7494859e+01
   1.7888265e+01  -2.4325714e+01   5.0000000e+01   2.8078286e+00   5.9191194e+00   1.9260916e+01
   1.7865583e+01  -2.4452765e+01   5.0000000e+01   2.2479853e+00   4.1639938e+00   2.2365641e+01
   1.7847095e+01  -2.4580380e+01   5.0000000e+01   3.1820516e+00   3.0331923e+00   2.6218837e+01
   1.7832828e+01  -2.4708444e+01   5.0000000e+01   5.6797676e+00   2.7697781e+00   2.9437651e+01
   1.7822810e+01  -2.4836842e+01   5.0000000e+01   8.6567056e+00   3.1566362e+00   3.0949457e+01
   1.7817062e+01  -2.4965456e+01   5.0000000e+01   1.0869804e+01   3.9085549e+00   3.1130755e+01
   1.7815603e+01  -2.5094168e+01   5.0000000e+01   1.2329088e+01   5.0066284e+00   3.1010247e+01
   1.7818447e+01  -2.5222862e+01   5.0000000e+01   1.3898927e+01   6.5077607e+00   3.0731913e+01
   1.7825607e+01  -2.5351418e+01   5.0000000e+01   1.5961456e+01   8.1351782e+00   2.9520225e+01
   1.7837088e+01  -2.5479719e+01   5.0000000e+01   1.7990966e+01   9.3099697e+00   2.6738243e+01
   1.7852895e+01  -2.5607646e+01   5.0000000e+01   1.9200007e+01   9.5274813e+00   2.2535047e+01
   1.7873026e+01  -2.5735080e+01   5.0000000e+01   1.9073957e+01   8.7167864e+00   1.7491489e+01
   1.7897477e+01  -2.5861902e+01   5.0000000e+01   1.7239959e+01   7.2283660e+00   1.2398978e+01
   1.7926240e+01  -2.5987996e+01   5.0000000e+01   1.3773736e+01   5.3260029e+00   8.2292372e+00
   1.7959301e+01  -2.6113241e+01   5.0000000e+01   9.2916256e+00   3.0942491e+00   5.4484533e+00
   1.7996643e+01  -2.6237521e+01   5.0000000e+01   4.3271615e+00   7.1272849e-01   4.0785511e+00
   1.8038245e+01  -2.6360719e+01   5.0000000e+01  -5.7591818e-01  -1.7290436e+00   4.0630890e+00
   1.8084083e+01  -2.6482717e+01   5.0000000e+01  -4.9732893e+00  -4.0779773e+00   4.9552775e+00
   1.8134125e+01  -2.6603401e+01   5.0000000e+01  -8.9746319e+00  -5.8677089e+00   6.5121451e+00
   1.8188338e+01  -2.6722654e+01   5.0000000e+01  -1.2759225e+01  -6.8392272e+00   9.2362054e+00
   1.8246685e+01  -2.6840364e+01   5.0000000e+01  -1.6030165e+01  -7.0980178e+00   1.3944389e+01
   1.8309121e+01  -2.6956416e+01   5.0000000e+01  -1.7610375e+01  -6.9058327e+00   2.1056781e+01
   1.8375601e+01  -2.7070700e+01   5.0000000e+01  -1.6005710e+01  -6.6241112e+00   2.9340820e+01
   1.8446073e+01  -2.7183105e+01   5.0000000e+01  -1.1291964e+01  -6.3617427e+00   3.6375076e+01
   1.8520480e+01  -2.7293523e+01   5.0000000e+01  -5.0937250e+00  -6.1300115e+00   4.0907170e+01
   1.8598764e+01  -2.7401844e+01   5.0000000e+01   1.3208665e+00  -6.3482606e+00   4.3089157e+01
   1.8680860e+01  -2.7507965e+01   5.0000000e+01   7.5356531e+00  -7.4301992e+00   4.2978678e+01
   1.8766698e+01  -2.7611781e+01   5.0000000e+01   1.3185605e+01  -9.1679768e+00   4.0347106e+01
   1.8856206e+01  -2.7713190e+01   5.0000000e+01   1.7741040e+01  -1.0965058e+01   3.5408732e+01
   1.8949307e+01  -2.7812092e+01   5.0000000e+01   2.0839744e+01  -1.2318881e+01   2.8724403e+01
   1.9045919e+01  -2.7908389e+01   5.0000000e+01   2.2194742e+01  -1.2779130e+01   2.0850032e+01
   1.9145956e+01  -2.8001987e+01   5.0000000e+01   2.1604924e+01  -1.1984259e+01   1.2600419e+01
   1.9249328e+01  -2.8092791e+01   5.0000000e+01   1.9201801e+01  -9.9075301e+00   4.8078009e+00
   1.9355941e+01  -2.8180711e+01   5.0000000e+01   1.5124477e+01  -6.5808297e+00  -1.9132010e+00
   1.9465698e+01  -2.8265659e+01   5.0000000e+01   9.4387550e+00  -2.0014477e+00  -6.5560377e+00
   1.9578496e+01  -2.8347550e+01   5.0000000e+01   2.5967450e+00   3.2479592e+00  -7.6131009e+00
   1.9694230e+01  -2.8426301e+01   5.0000000e+01  -4.1392971e+00   7.3953578e+00  -4.1145267e+00
   1.9812791e+01  -2.8501834e+01   5.0000000e+01  -8.9139553e+00   8.1733118e+00   2.5611089e+00
   1.9934064e+01  -2.8574071e+01   5.0000000e+01  -1.0988425e+01   4.9548315e+00   8.8088794e+00
   2.0057933e+01  -2.8642939e+01   5.0000000e+01  -1.1744198e+01  -7.4993301e-01   1.2014490e+01
   2.0184280e+01  -2.8708368e+01   5.0000000e+01  -1.3142167e+01  -7.1760556e+00   1.2212672e+01
   2.0312979e+01  -2.8770292e+01   5.0000000e+01  -1.6152992e+01  -1.3453836e+01   1.0563555e+01
   2.0443904e+01  -2.8828647e+01   5.0000000e+01  -2.0740515e+01  -1.9145751e+01   7.7279175e+00
   2.0576927e+01  -2.8883373e+01   5.0000000e+01  -2.6405018e+01  -2.3263238e+01   3.9701719e+00
   2.0711915e+01  -2.8934415e+01   5.0000000e+01  -3.2231263e+01  -2.4706381e+01   4.3511723e-01
   2.0848732e+01  -2.8981720e+01   5.0000000e+01  -3.6756052e+01  -2.4037404e+01  -1.4439396e+00
   2.0987242e+01  -2.9025238e+01   5.0000000e+01  -3.8957714e+01  -2.3220712e+01  -2.0505459e+00
   2.1127305e+01  -2.9064927e+01   5.0000000e+01  -3.9405379e+01  -2.3482508e+01  -3.3571081e+00
   2.1268778e+01  -2.9100743e+01   5.0000000e+01  -3.9528114e+01  -2.4331161e+01  -6.5036571e+00
   2.1411518e+01  -2.9132651e+01   5.0000000e+01  -3.9862831e+01  -2.5088418e+01  -1.0487943e+01
   2.1555379e+01  -2.9160617e+01   5.0000000e+01  -3.9653046e+01  -2.6775248e+01  -1.4410284e+01
   2.1700213e+01  -2.9184612e+01   5.0000000e+01  -3.8031573e+01  -3.0402268e+01  -2.0028748e+01
   2.1845873e+01  -2.9204611e+01   5.0000000e+01  -3.5329716e+01  -3.4483489e+01  -2.9840439e+01
   2.1992207e+01  -2.9220594e+01   5.0000000e+01  -3.3284633e+01  -3.6260365e+01  -4.4530002e+01
   2.2139067e+01  -2.9232544e+01   5.0000000e+01  -3.2816198e+01  -3.2744016e+01  -6.3703349e+01
   2.2286299e+01  -2.9240449e+01   5.0000000e+01  -3.1408428e+01  -1.9336926e+01  -8.4758359e+01
   2.2433751e+01  -2.9244300e+01   5.0000000e+01  -2.5255892e+01   7.0146323e+00  -9.8539493e+01
   2.2581273e+01  -2.9244093e+01   5.0000000e+01  -1.4136798e+01   3.9563022e+01  -9.3442860e+01
   2.2728710e+01  -2.9239829e+01   5.0000000e+01  -1.8247054e+00   6.3999490e+01  -6.9115885e+01
   2.2875911e+01  -2.9231512e+01   5.0000000e+01   7.7279458e+00   7.3031595e+01  -3.7639031e+01
   2.3022724e+01  -2.9219151e+01   5.0000000e+01   1.2995982e+01   7.0276842e+01  -9.4901109e+00
   2.3168997e+01  -2.9202758e+01   5.0000000e+01   1.4559569e+01   6.1280591e+01   1.1861069e+01
   2.3314579e+01  -2.9182350e+01   5.0000000e+01   1.3703646e+01   5.0088020e+01   2.5755087e+01
   2.3459321e+01  -2.9157949e+01   5.0000000e+01   1.1499179e+01   4.0106214e+01   3.3449701e+01
   2.3603074e+01  -2.9129581e+01   5.0000000e+01   8.5424840e+00   3.2705801e+01   3.7692356e+01
   2.3745692e+01  -2.9097273e+01   5.0000000e+01   5.0487801e+00   2.7113677e+01   4.0602113e+01
   2.3887028e+01  -2.9061061e+01   5.0000000e+01   1.1699681e+00   2.1986809e+01   4.2649475e+01
   2.4026939e+01  -2.9020980e+01   5.0000000e+01  -2.7046001e+00   1.7037420e+01   4.3182171e+01
   2.4165283e+01  -2.8977074e+01   5.0000000e+01  -6.0371265e+00   1.3168938e+01   4.2132721e+01
   2.4301920e+01  -2.8929386e+01   5.0000000e+01  -8.3499763e+00   1.1058553e+01   4.0514895e+01
   2.4436714e+01  -2.8877967e+01   5.0000000e+01  -9.3288900e+00   1.0487846e+01   3.9721267e+01
   2.4569529e+01  -2.8822868e+01   5.0000000e+01  -9.1064412e+00   1.0160017e+01   4.0753412e+01
   2.5284045e+01  -2.8598997e+01   5.0000000e+01   3.5843351e-02  -1.4355742e+01   3.4097678e+01
   2.5402001e+01  -2.8523370e+01   5.0000000e+01   6.0504949e-01  -1.5658575e+01   2.7620351e+01
   2.5517216e+01  -2.8444644e+01   5.0000000e+01   1.9975829e+00  -1.4695886e+01   2.0920899e+01
   2.5629585e+01  -2.8362894e+01   5.0000000e+01   4.5227971e+00  -1.1464969e+01   1.6546800e+01
   2.5739012e+01  -2.8278198e+01   5.0000000e+01   6.9471469e+00  -7.6921007e+00   1.6257259e+01
   2.5845402e+01  -2.8190634e+01   5.0000000e+01   7.6942053e+00  -5.0333486e+00   1.9432848e+01
   2.5948661e+01  -2.8100286e+01   5.0000000e+01   5.9533115e+00  -4.0510421e+00   2.4184618e+01
   2.6048704e+01  -2.8007237e+01   5.0000000e+01   1.9054071e+00  -4.3324891e+00   2.8268821e+01
   2.6145445e+01  -2.7911575e+01   5.0000000e+01  -3.3144168e+00  -4.6223809e+00   3.0140113e+01
   2.6238805e+01  -2.7813389e+01   5.0000000e+01  -8.4252341e+00  -3.8461963e+00   2.9894583e+01
   2.6328707e+01  -2.7712769e+01   5.0000000e+01  -1.2763712e+01  -2.0639442e+00   2.8275319e+01
   2.6415077e+01  -2.7609809e+01   5.0000000e+01  -1.5782539e+01   1.0782295e-01   2.5507013e+01
   2.6497849e+01  -2.7504604e+01   5.0000000e+01  -1.6623071e+01   2.2173581e+00   2.1898574e+01
   2.6576956e+01  -2.7397250e+01   5.0000000e+01  -1.4873036e+01   3.9752082e+00   1.8416387e+01
   2.6652337e+01  -2.7287846e+01   5.0000000e+01  -1.1299064e+01   5.4538130e+00   1.6329378e+01
   2.6723936e+01  -2.7176491e+01   5.0000000e+01  -7.8716695e+00   6.9668362e+00   1.6671207e+01
   2.6791700e+01  -2.7063287e+01   5.0000000e+01  -6.9035266e+00   8.4373050e+00   1.9182857e+01
   2.6855579e+01  -2.6948337e+01   5.0000000e+01  -9.4665011e+00   9.4368051e+00   2.2058750e+01
   2.6915529e+01  -2.6831743e+01   5.0000000e+01  -1.4858766e+01   9.4255951e+00   2.3234735e+01
   2.6971508e+01  -2.6713612e+01   5.0000000e+01  -2.1096531e+01   8.1393761e+00   2.1295256e+01
   2.7023479e+01  -2.6594048e+01   5.0000000e+01  -2.5726833e+01   6.4154964e+00   1.6340939e+01
   2.7071409e+01  -2.6473160e+01   5.0000000e+01  -2.7597521e+01   5.5841569e+00   1.0179126e+01
   2.7115268e+01  -2.6351054e+01   5.0000000e+01  -2.7195548e+01   6.0953757e+00   4.4397794e+00
   2.7155030e+01  -2.6227838e+01   5.0000000e+01  -2.5046430e+01   7.7857173e+00  -1.7836354e-02
   2.7190675e+01  -2.6103623e+01   5.0000000e+01  -2.1731741e+01   1.0390236e+01  -2.3169297e+00
   2.7222184e+01  -2.5978518e+01   5.0000000e+01  -1.8351598e+01   1.3268949e+01  -2.2242392e+00
   2.7249543e+01  -2.5852632e+01   5.0000000e+01  -1.6015200e+01   1.5672233e+01  -1.9236609e-01
   2.7272741e+01  -2.5726075e+01   5.0000000e+01  -1.6198193e+01   1.7112880e+01   2.9063916e+00
   2.7291773e+01  -2.5598959e+01   5.0000000e+01  -2.0095212e+01   1.7184355e+01   4.6208451e+00
   2.7306634e+01  -2.5471393e+01   5.0000000e+01  -2.6441730e+01   1.5682952e+01   1.5979357e+00
   2.7317326e+01  -2.5343488e+01   5.0000000e+01  -3.1426416e+01   1.2926303e+01  -7.4482692e+00
   2.7323852e+01  -2.5215355e+01   5.0000000e+01  -3.1199508e+01   9.2809807e+00  -2.0027392e+01
   2.7326221e+01  -2.5087105e+01   5.0000000e+01  -2.4848733e+01   4.5395057e+00  -3.0944383e+01
   2.7324443e+01  -2.4958846e+01   5.0000000e+01  -1.5532685e+01  -1.3411184e+00  -3.5771337e+01
   2.7318532e+01  -2.4830689e+01   5.0000000e+01  -8.1419897e+00  -7.2544464e+00  -3.4257871e+01
   2.7308508e+01  -2.4702744e+01   5.0000000e+01  -5.2798953e+00  -1.1846566e+01  -3.0192068e+01
   2.7294390e+01  -2.4575119e+01   5.0000000e+01  -5.5862654e+00  -1.4661617e+01  -2.7463188e+01
   2.7276203e+01  -2.4447922e+01   5.0000000e+01  -6.1228144e+00  -1.5525897e+01  -2.6702815e+01
   2.7253974e+01  -2.4321261e+01   5.0000000e+01  -5.6684312e+00  -1.4149233e+01  -2.6264160e+01
   2.7227735e+01  -2.4195243e+01   5.0000000e+01  -5.0298132e+00  -1.0756988e+01  -2.5157943e+01
   2.7197519e+01  -2.4069973e+01   5.0000000e+01  -5.1220738e+00  -5.9316660e+00  -2.3932348e+01
   2.7163362e+01  -2.3945558e+01   5.0000000e+01  -5.7132172e+00  -1.0002827e-01  -2.3481647e+01
   2.7125304e+01  -2.3822100e+01   5.0000000e+01  -5.8939823e+00   6.2488456e+00  -2.3706386e+01
   2.7083388e+01  -2.3699702e+01   5.0000000e+01  -5.4002398e+00   1.2265866e+01  -2.3495975e+01
   2.7037658e+01  -2.3578467e+01   5.0000000e+01  -5.0782113e+00   1.6817986e+01  -2.2209995e+01
   2.6988164e+01  -2.3458495e+01   5.0000000e+01  -5.4911801e+00   1.8964022e+01  -2.1033162e+01
   2.6934955e+01  -2.3339886e+01   5.0000000e+01  -5.1905535e+00   1.8383768e+01  -2.1666351e+01
   2.6878085e+01  -2.3222737e+01   5.0000000e+01  -2.0953036e+00   1.5459953e+01  -2.3245150e+01
   2.6817610e+01  -2.3107144e+01   5.0000000e+01   3.3289055e+00   1.1412487e+01  -2.2859757e+01
   2.6753589e+01  -2.2993204e+01   5.0000000e+01   8.5843964e+00   7.8439944e+00  -1.9192615e+01
   2.6686081e+01  -2.2881009e+01   5.0000000e+01   1.1796717e+01   5.6886119e+00  -1.3123607e+01
   2.6615151e+01  -2.2770651e+01   5.0000000e+01   1.1956579e+01   4.9141374e+00  -6.2363474e+00
   2.6540863e+01  -2.2662220e+01   5.0000000e+01   8.6502305e+00   4.7975160e+00  -4.0204397e-01
   2.6463287e+01  -2.2555805e+01   5.0000000e+01   2.5550517e+00   4.3667204e+00   2.8614467e+00
   2.6382491e+01  -2.2451492e+01   5.0000000e+01  -4.7145404e+00   2.9571747e+00   2.9153198e+00
   2.6298547e+01  -2.2349366e+01   5.0000000e+01  -1.1004153e+01   2.6901686e-01   1.0192947e-01
   2.6211531e+01  -2.2249510e+01   5.0000000e+01  -1.4597861e+01  -3.5515299e+00  -3.9372154e+00
   2.6121518e+01  -2.2152005e+01   5.0000000e+01  -1.5334905e+01  -7.7086145e+00  -7.2484583e+00
   2.6028587e+01  -2.2056929e+01   5.0000000e+01  -1.4078884e+01  -1.1249796e+01  -8.9582413e+00
   2.5932816e+01  -2.1964359e+01   5.0000000e+01  -1.1741020e+01  -1.3586037e+01  -9.1407755e+00
   2.5834289e+01  -2.1874369e+01   5.0000000e+01  -9.1230618e+00  -1.4582412e+01  -8.3426404e+00
   2.5733089e+01  -2.1787033e+01   5.0000000e+01  -6.7905357e+00  -1.4579155e+01  -7.3279600e+00
   2.5629301e+01  -2.1702420e+01   5.0000000e+01  -4.9796471e+00  -1.4210162e+01  -6.6936045e+00
   2.5523013e+01  -2.1620598e+01   5.0000000e+01  -3.6327462e+00  -1.4201788e+01  -6.6595835e+00
   2.5414312e+01  -2.1541632e+01   5.0000000e+01  -2.4102094e+00  -1.5178612e+01  -6.8851028e+00
   2.5303289e+01  -2.1465587e+01   5.0000000e+01  -1.0709629e+00  -1.7235189e+01  -6.5763440e+00
   2.5190035e+01  -2.1392522e+01   5.0000000e+01   3.1270198e-01  -1.9800372e+01  -5.2012292e+00
   2.5074643e+01  -2.1322496e+01   5.0000000e+01   1.8434110e+00  -2.2103410e+01  -2.7915868e+00
   2.4957208e+01  -2.1255564e+01   5.0000000e+01   3.8164810e+00  -2.3581046e+01   6.1265780e-01
   2.4837825e+01  -2.1191781e+01   5.0000000e+01   6.0508644e+00  -2.3799902e+01   5.1371116e+00
   2.4716590e+01  -2.1131197e+01   5.0000000e+01   8.0171207e+00  -2.2248097e+01   1.0555775e+01
   2.4593602e+01  -2.1073860e+01   5.0000000e+01   9.4113550e+00  -1.8308950e+01   1.5955412e+01
   2.4468959e+01  -2.1019816e+01   5.0000000e+01   9.9921776e+00  -1.1922830e+01   1.9672734e+01
   2.4342761e+01  -2.0969108e+01   5.0000000e+01   9.4565784e+00  -4.6070074e+00   2.0118713e+01
   2.4215110e+01  -2.0921775e+01   5.0000000e+01   7.8117882e+00   1.2533426e+00   1.7292225e+01
   2.4086107e+01  -2.0877856e+01   5.0000000e+01   5.4991678e+00   4.2645428e+00   1.2709143e+01
   2.3955855e+01  -2.0837385e+01   5.0000000e+01   3.1473265e+00   4.4403931e+00   8.2313954e+00
   2.3824456e+01  -2.0800394e+01   5.0000000e+01   1.1326557e+00   2.8950729e+00   5.3486288e+00
   2.3692016e+01  -2.0766913e+01   5.0000000e+01  -7.4212520e-01   1.3368896e+00   4.2117808e+00
   2.3558639e+01  -2.0736969e+01   5.0000000e+01  -2.8969012e+00   7.4232192e-01   3.5428319e+00
   2.3424429e+01  -2.0710584e+01   5.0000000e+01  -5.3109488e+00   9.3050574e-01   2.0558158e+00
   2.3289494e+01  -2.0687779e+01   5.0000000e+01  -7.5216537e+00   1.1985399e+00  -7.4478892e-01
   2.3153938e+01  -2.0668574e+01   5.0000000e+01  -9.1647011e+00   6.8567636e-01  -4.5036787e+00
   2.3017869e+01  -2.0652982e+01   5.0000000e+01  -1.0181928e+01  -1.1100830e+00  -8.1054434e+00
   2.2881394e+01  -2.0641017e+01   5.0000000e+01  -1.0737235e+01  -3.8951442e+00  -1.0386322e+01
   2.2744620e+01  -2.0632688e+01   5.0000000e+01  -1.1115547e+01  -6.8263314e+00  -1.1035298e+01
   2.2607654e+01  -2.0628000e+01   5.0000000e+01  -1.1408713e+01  -9.2927915e+00  -1.0906200e+01
   2.2470603e+01  -2.0626959e+01   5.0000000e+01  -1.1407667e+01  -1.1545290e+01  -1.1062892e+01
   2.2333575e+01  -2.0629565e+01   5.0000000e+01  -1.0898253e+01  -1.4013799e+01  -1.1648497e+01
   2.2196678e+01  -2.0635815e+01   5.0000000e+01  -9.8227320e+00  -1.6519305e+01  -1.2401106e+01
   2.2060019e+01  -2.0645705e+01   5.0000000e+01  -8.3651205e+00  -1.8894266e+01  -1.3413328e+01
   2.1923705e+01  -2.0659227e+01   5.0000000e+01  -6.9250380e+00  -2.1568630e+01  -1.4723234e+01
   2.1787844e+01  -2.0676371e+01   5.0000000e+01  -5.6892203e+00  -2.5206126e+01  -1.5737207e+01
   2.1652541e+01  -2.0697122e+01   5.0000000e+01  -4.4087729e+00  -2.9929642e+01  -1.5315315e+01
   2.1517904e+01  -2.0721465e+01   5.0000000e+01  -2.8114579e+00  -3.5003998e+01  -1.2636421e+01
   2.1384039e+01  -2.0749379e+01   5.0000000e+01  -1.0012394e+00  -3.9466621e+01  -7.5920208e+00
   2.1251050e+01  -2.0780844e+01   5.0000000e+01   7.7707362e-01  -4.2303342e+01  -3.1613564e-01
   2.1119044e+01  -2.0815834e+01   5.0000000e+01   2.6074056e+00  -4.2269614e+01   8.3584294e+00
   2.0988125e+01  -2.0854321e+01   5.0000000e+01   4.7920052e+00  -3.8942699e+01   1.6444836e+01
   2.0858395e+01  -2.0896275e+01   5.0000000e+01   7.3328656e+00  -3.3433804e+01   2.2068651e+01
   2.0729960e+01  -2.0941663e+01   5.0000000e+01   9.7272963e+00  -2.7456400e+01   2.4666320e+01
   2.0602920e+01  -2.0990449e+01   5.0000000e+01   1.1265088e+01  -2.2230321e+01   2.4926518e+01
   2.0477377e+01  -2.1042593e+01   5.0000000e+01   1.1565812e+01  -1.8020178e+01   2.4039593e+01
   2.0353432e+01  -2.1098055e+01   5.0000000e+01   1.0789475e+01  -1.4539923e+01   2.2752836e+01
   2.0231184e+01  -2.1156791e+01   5.0000000e+01   9.3854810e+00  -1.1792501e+01   2.1398170e+01
   2.0110731e+01  -2.1218753e+01   5.0000000e+01   7.9250643e+00  -9.8527188e+00   2.0485280e+01
   1.9992172e+01  -2.1283893e+01   5.0000000e+01   6.9146481e+00  -8.3002853e+00   2.0240980e+01
   1.9875602e+01  -2.1352159e+01   5.0000000e+01   6.4289533e+00  -6.7151402e+00   2.0276354e+01
   1.9761115e+01  -2.1423495e+01   5.0000000e+01   6.2979844e+00  -4.9671832e+00   2.0259429e+01
   1.9648807e+01  -2.1497846e+01   5.0000000e+01   6.5171769e+00  -2.8745146e+00   1.9856204e+01
   1.9538769e+01  -2.1575152e+01   5.0000000e+01   6.9317315e+00  -4.7076839e-01   1.8427843e+01
   1.9431092e+01  -2.1655351e+01   5.0000000e+01   7.0027467e+00   1.8477860e+00   1.5726536e+01
   1.9325865e+01  -2.1738378e+01   5.0000000e+01   6.1805504e+00   3.7366779e+00   1.2177580e+01
   1.9223177e+01  -2.1824168e+01   5.0000000e+01   4.2471561e+00   4.9341302e+00   8.6467610e+00
   1.9123113e+01  -2.1912651e+01   5.0000000e+01   1.6953496e+00   5.4384253e+00   6.2090222e+00
   1.9025759e+01  -2.2003757e+01   5.0000000e+01  -4.6383594e-01   5.7107283e+00   5.1732456e+00
   1.8931196e+01  -2.2097411e+01   5.0000000e+01  -1.7396239e+00   6.0637337e+00   4.8861039e+00
   1.8839507e+01  -2.2193539e+01   5.0000000e+01  -2.3176070e+00   6.4104083e+00   4.8635548e+00
   1.8750770e+01  -2.2292062e+01   5.0000000e+01  -2.4542270e+00   6.6401603e+00   5.0251544e+00
   1.8665063e+01  -2.2392902e+01   5.0000000e+01  -2.4172688e+00   6.6192043e+00   5.4082198e+00
   1.8582461e+01  -2.2495976e+01   5.0000000e+01  -2.3420257e+00   6.2109453e+00   6.2898466e+00
   1.8503037e+01  -2.2601201e+01   5.0000000e+01  -2.0203466e+00   5.5052955e+00   7.8886423e+00
   1.8426863e+01  -2.2708492e+01   5.0000000e+01  -1.2227714e+00   4.7854660e+00   1.0014535e+01
   1.8354007e+01  -2.2817760e+01   5.0000000e+01   8.0365589e-03   4.2710708e+00   1.2227954e+01
   1.8284537e+01  -2.2928917e+01   5.0000000e+01   1.4711114e+00   3.9537096e+00   1.4245980e+01
   1.8218518e+01  -2.3041873e+01   5.0000000e+01   3.1282668e+00   3.8344520e+00   1.6043471e+01
   1.8156010e+01  -2.3156533e+01   5.0000000e+01   5.0130129e+00   4.1144446e+00   1.7439201e+01
   1.8097074e+01  -2.3272805e+01   5.0000000e+01   6.8470970e+00   4.9514629e+00   1.8143120e+01
   1.8041768e+01  -2.3390593e+01   5.0000000e+01   8.2526528e+00   6.3115313e+00   1.8131803e+01
   1.7990146e+01  -2.3509799e+01   5.0000000e+01   9.0593369e+00   7.9573336e+00   1.7500833e+01
   1.7942261e+01  -2.3630324e+01   5.0000000e+01   9.2267480e+00   9.4706321e+00   1.6367960e+01
   1.7898162e+01  -2.3752070e+01   5.0000000e+01   8.7671667e+00   1.0526641e+01   1.4926827e+01
   1.7857895e+01  -2.3874935e+01   5.0000000e+01   7.6147459e+00   1.1003593e+01   1.3486305e+01
   1.7821506e+01  -2.3998817e+01   5.0000000e+01   5.7468082e+00   1.0776555e+01   1.2632923e+01
   1.7789035e+01  -2.4123612e+01   5.0000000e+01   3.4995424e+00   9.7368144e+00   1.3038946e+01
   1.7760520e+01  -2.4249215e+01   5.0000000e+01   1.5194370e+00   8.0921586e+00   1.5098678e+01
   1.7735997e+01  -2.4375522e+01   5.0000000e+01   5.7954414e-01   6.4783713e+00   1.8707904e+01
   1.7715499e+01  -2.4502426e+01   5.0000000e+01   1.3260191e+00   5.6130183e+00   2.3084249e+01
   1.7699054e+01  -2.4629820e+01   5.0000000e+01   3.8656932e+00   5.7998345e+00   2.6914791e+01
   1.7686689e+01  -2.4757596e+01   5.0000000e+01   7.3986708e+00   6.8250151e+00   2.8999116e+01
   1.7678427e+01  -2.4885645e+01   5.0000000e+01   1.0565799e+01   8.2911724e+00   2.9220964e+01
   1.7674288e+01  -2.5013859e+01   5.0000000e+01   1.2788496e+01   9.9625166e+00   2.8510490e+01
   1.7674287e+01  -2.5142128e+01   5.0000000e+01   1.4631280e+01   1.1766487e+01   2.7366188e+01
   1.7678438e+01  -2.5270341e+01   5.0000000e+01   1.6557896e+01   1.3490652e+01   2.5336142e+01
   1.7686750e+01  -2.5398390e+01   5.0000000e+01   1.8253517e+01   1.4642559e+01   2.1979121e+01
   1.7699230e+01  -2.5526163e+01   5.0000000e+01   1.9071870e+01   1.4744210e+01   1.7584421e+01
   1.7715881e+01  -2.5653549e+01   5.0000000e+01   1.8769108e+01   1.3688809e+01   1.2930216e+01
   1.7736700e+01  -2.5780439e+01   5.0000000e+01   1.7440030e+01   1.1863810e+01   8.4147616e+00
   1.7761684e+01  -2.5906722e+01   5.0000000e+01   1.4796886e+01   9.8646850e+00   4.2844899e+00
   1.7790825e+01  -2.6032286e+01   5.0000000e+01   1.0751329e+01   7.8706926e+00   1.3168741e+00
   1.7824110e+01  -2.6157023e+01   5.0000000e+01   5.9518590e+00   5.6945963e+00  -6.5195694e-02
   1.7861523e+01  -2.6280823e+01   5.0000000e+01   8.9806849e-01   3.3229563e+00   1.7527566e-02
   1.7903046e+01  -2.6403575e+01   5.0000000e+01  -3.9825975e+00   7.4654562e-01   1.6254620e+00
   1.7948655e+01  -2.6525172e+01   5.0000000e+01  -8.0738796e+00  -2.0063556e+00   4.4061190e+00
   1.7998322e+01  -2.6645506e+01   5.0000000e+01  -1.1367455e+01  -4.3882927e+00   7.8012998e+00
   1.8052016e+01  -2.6764468e+01   5.0000000e+01  -1.4137029e+01  -5.7473199e+00   1.2159947e+01
   1.8109704e+01  -2.6881953e+01   5.0000000e+01  -1.5929669e+01  -5.8539142e+00   1.8260776e+01
   1.8171344e+01  -2.6997854e+01   5.0000000e+01  -1.5501881e+01  -4.8969755e+00   2.6093069e+01
   1.8236896e+01  -2.7112068e+01   5.0000000e+01  -1.1793878e+01  -3.4487040e+00   3.4078435e+01
   1.8306311e+01  -2.7224492e+01   5.0000000e+01  -5.4127737e+00  -1.9749744e+00   3.9872152e+01
   1.8379539e+01  -2.7335022e+01   5.0000000e+01   1.6503679e+00  -5.9352265e-01   4.2603317e+01
   1.8456526e+01  -2.7443559e+01   5.0000000e+01   8.0552895e+00   3.2822913e-01   4.3117607e+01
   1.8537213e+01  -2.7550003e+01   5.0000000e+01   1.3721425e+01   1.4155810e-01   4.2055286e+01
   1.8621536e+01  -2.7654256e+01   5.0000000e+01   1.8777245e+01  -1.3097468e+00   3.9145835e+01
   1.8709430e+01  -2.7756224e+01   5.0000000e+01   2.3001668e+01  -3.4143693e+00   3.4138844e+01
   1.8800824e+01  -2.7855811e+01   5.0000000e+01   2.6098504e+01  -5.3613207e+00   2.7313727e+01
   1.8895644e+01  -2.7952925e+01   5.0000000e+01   2.7760638e+01  -6.5648642e+00   1.9129889e+01
   1.8993812e+01  -2.8047477e+01   5.0000000e+01   2.7601279e+01  -6.6243689e+00   1.0235758e+01
   1.9095245e+01  -2.8139378e+01   5.0000000e+01   2.5460568e+01  -5.4599127e+00   1.5194854e+00
   1.9199858e+01  -2.8228542e+01   5.0000000e+01   2.1444038e+01  -3.2189278e+00  -6.2810587e+00
   1.9307562e+01  -2.8314886e+01   5.0000000e+01   1.5742158e+01   1.2552664e-01  -1.2434995e+01
   1.9418263e+01  -2.8398328e+01   5.0000000e+01   8.7259750e+00   4.6299389e+00  -1.5807454e+01
   1.9531865e+01  -2.8478790e+01   5.0000000e+01   1.1877690e+00   9.6098451e+00  -1.4906867e+01
   1.9648269e+01  -2.8556195e+01   5.0000000e+01  -5.3451181e+00   1.2936414e+01  -9.2231391e+00
   1.9767369e+01  -2.8630471e+01   5.0000000e+01  -9.4371975e+00   1.2363308e+01  -1.1854570e+00
   1.9889061e+01  -2.8701547e+01   5.0000000e+01  -1.1396613e+01   8.1021303e+00   5.3628178e+00
   2.0013234e+01  -2.8769354e+01   5.0000000e+01  -1.2900018e+01   2.3270458e+00   8.8591004e+00
   2.0139775e+01  -2.8833829e+01   5.0000000e+01  -1.5206982e+01  -3.3534927e+00   1.0198071e+01
   2.0268567e+01  -2.8894909e+01   5.0000000e+01  -1.8547410e+01  -8.5611545e+00   1.0578080e+01
   2.0399494e+01  -2.8952536e+01   5.0000000e+01  -2.2557965e+01  -1.3331095e+01   1.0325354e+01
   2.0532431e+01  -2.9006654e+01   5.0000000e+01  -2.6776746e+01  -1.7163291e+01   9.2240532e+00
   2.0667257e+01  -2.9057212e+01   5.0000000e+01  -3.0584945e+01  -1.9348239e+01   7.6929093e+00
   2.0803844e+01  -2.9104160e+01   5.0000000e+01  -3.3168030e+01  -2.0222862e+01   6.3329468e+00
   2.0942063e+01  -2.9147453e+01   5.0000000e+01  -3.4421898e+01  -2.0737785e+01   4.7921495e+00
   2.1081784e+01  -2.9187049e+01   5.0000000e+01  -3.5374392e+01  -2.1386752e+01   2.5193056e+00
   2.1222873e+01  -2.9222910e+01   5.0000000e+01  -3.6986133e+01  -2.2230159e+01  -3.4749090e-01
   2.1365196e+01  -2.9255000e+01   5.0000000e+01  -3.8941502e+01  -2.3437754e+01  -3.1268957e+00
   2.1508616e+01  -2.9283290e+01   5.0000000e+01  -4.0033306e+01  -2.6020740e+01  -5.7663677e+00
   2.1652996e+01  -2.9307750e+01   5.0000000e+01  -3.9548539e+01  -3.0768065e+01  -1.0404160e+01
   2.1798196e+01  -2.9328358e+01   5.0000000e+01  -3.8054435e+01  -3.5757629e+01  -1.9786809e+01
   2.1944077e+01  -2.9345093e+01   5.0000000e+01  -3.7125199e+01  -3.7403295e+01  -3.3551921e+01
   2.2090497e+01  -2.9357939e+01   5.0000000e+01  -3.8107903e+01  -3.4203447e+01  -4.9048169e+01
   2.2237314e+01  -2.9366883e+01   5.0000000e+01  -4.0060341e+01  -2.5718474e+01  -6.5382954e+01
   2.2384387e+01  -2.9371917e+01   5.0000000e+01  -3.9071630e+01  -8.8152392e+00  -8.0748732e+01
   2.2531571e+01  -2.9373035e+01   5.0000000e+01  -3.1549758e+01   1.7425673e+01  -8.6975466e+01
   2.2678725e+01  -2.9370237e+01   5.0000000e+01  -1.8633243e+01   4.4496692e+01  -7.6671114e+01
   2.2825705e+01  -2.9363525e+01   5.0000000e+01  -5.3385374e+00   6.1650594e+01  -5.3670321e+01
   2.2972370e+01  -2.9352906e+01   5.0000000e+01   4.5436169e+00   6.6569828e+01  -2.7659250e+01
   2.3118576e+01  -2.9338390e+01   5.0000000e+01   1.0411632e+01   6.2762307e+01  -4.6851217e+00
   2.3264182e+01  -2.9319991e+01   5.0000000e+01   1.3082101e+01   5.4103353e+01   1.2576310e+01
   2.3409047e+01  -2.9297728e+01   5.0000000e+01   1.3559055e+01   4.4534249e+01   2.3487808e+01
   2.3553033e+01  -2.9271622e+01   5.0000000e+01   1.2576900e+01   3.6868715e+01   2.9984435e+01
   2.3695999e+01  -2.9241698e+01   5.0000000e+01   1.0379902e+01   3.1358982e+01   3.4735188e+01
   2.3837809e+01  -2.9207986e+01   5.0000000e+01   7.1653133e+00   2.6587720e+01   3.9052464e+01
   2.3978328e+01  -2.9170519e+01   5.0000000e+01   3.4194753e+00   2.1441060e+01   4.2444618e+01
   2.4117420e+01  -2.9129332e+01   5.0000000e+01  -1.9001806e-01   1.6387170e+01   4.4090672e+01
   2.4254955e+01  -2.9084465e+01   5.0000000e+01  -3.0615946e+00   1.2408760e+01   4.4336136e+01
   2.4390802e+01  -2.9035963e+01   5.0000000e+01  -4.7670615e+00   9.7669464e+00   4.4148476e+01
   2.4524833e+01  -2.8983872e+01   5.0000000e+01  -5.1147359e+00   7.9896478e+00   4.4499214e+01
   2.4656923e+01  -2.8928242e+01   5.0000000e+01  -4.4146289e+00   5.8391061e+00   4.5789862e+01
   2.4786949e+01  -2.8869127e+01   5.0000000e+01  -3.3269164e+00   2.2163291e+00   4.7052687e+01
   2.4914790e+01  -2.8806583e+01   5.0000000e+01  -2.3147447e+00  -2.6940636e+00   4.6742623e+01
   2.5040329e+01  -2.8740671e+01   5.0000000e+01  -1.4354069e+00  -7.7034369e+00   4.4094420e+01
   2.5163451e+01  -2.8671454e+01   5.0000000e+01  -6.0233384e-01  -1.1668112e+01   3.9601007e+01
   2.5837641e+01  -2.8373015e+01   5.0000000e+01   5.2451550e+00  -4.3281384e+00   1.1705533e+01
   2.5944205e+01  -2.8285289e+01   5.0000000e+01   5.8734993e+00  -1.3700268e+00   1.5034670e+01
   2.6047713e+01  -2.8194849e+01   5.0000000e+01   4.9949295e+00  -8.2369637e-01   1.9909861e+01
   2.6148081e+01  -2.8101775e+01   5.0000000e+01   2.6828746e+00  -2.0630618e+00   2.4344866e+01
   2.6245230e+01  -2.8006149e+01   5.0000000e+01  -4.6545887e-01  -3.4753207e+00   2.7122628e+01
   2.6339083e+01  -2.7908057e+01   5.0000000e+01  -3.8131695e+00  -3.8952790e+00   2.8460580e+01
   2.6429569e+01  -2.7807585e+01   5.0000000e+01  -7.1438844e+00  -3.4597388e+00   2.8900352e+01
   2.6516617e+01  -2.7704820e+01   5.0000000e+01  -1.0187262e+01  -2.7957855e+00   2.8204747e+01
   2.6600162e+01  -2.7599852e+01   5.0000000e+01  -1.2139526e+01  -2.1109338e+00   2.5949952e+01
   2.6680143e+01  -2.7492774e+01   5.0000000e+01  -1.2112347e+01  -1.1260569e+00   2.2445924e+01
   2.6756501e+01  -2.7383677e+01   5.0000000e+01  -9.8577720e+00   7.2394963e-01   1.9072532e+01
   2.6829181e+01  -2.7272657e+01   5.0000000e+01  -6.4462703e+00   3.6577935e+00   1.7923693e+01
   2.6898132e+01  -2.7159809e+01   5.0000000e+01  -4.2187234e+00   7.0370891e+00   2.0061687e+01
   2.6963308e+01  -2.7045230e+01   5.0000000e+01  -5.2868850e+00   9.9644131e+00   2.4340339e+01
   2.7024665e+01  -2.6929018e+01   5.0000000e+01  -1.0321236e+01   1.1627428e+01   2.8250016e+01
   2.7082162e+01  -2.6811273e+01   5.0000000e+01  -1.8040608e+01   1.1303420e+01   2.8785856e+01
   2.7135765e+01  -2.6692094e+01   5.0000000e+01  -2.4984997e+01   9.4692926e+00   2.4332504e+01
   2.7185439e+01  -2.6571583e+01   5.0000000e+01  -2.8187264e+01   7.9065697e+00   1.6946149e+01
   2.7231156e+01  -2.6449842e+01   5.0000000e+01  -2.8056325e+01   7.7798580e+00   9.9203983e+00
   2.7272890e+01  -2.6326972e+01   5.0000000e+01  -2.6146368e+01   8.8452934e+00   4.4256144e+00
   2.7310620e+01  -2.6203078e+01   5.0000000e+01  -2.2852466e+01   1.0378168e+01   9.3823247e-01
   2.7344327e+01  -2.6078262e+01   5.0000000e+01  -1.8886269e+01   1.1893691e+01   2.1066601e-01
   2.7373997e+01  -2.5952629e+01   5.0000000e+01  -1.5562326e+01   1.3257565e+01   2.0282156e+00
   2.7399618e+01  -2.5826283e+01   5.0000000e+01  -1.4081057e+01   1.4349586e+01   5.6573123e+00
   2.7421182e+01  -2.5699329e+01   5.0000000e+01  -1.6001601e+01   1.4834667e+01   9.6703663e+00
   2.7438684e+01  -2.5571871e+01   5.0000000e+01  -2.1918500e+01   1.4528249e+01   1.0777223e+01
   2.7452124e+01  -2.5444014e+01   5.0000000e+01  -2.9400631e+01   1.3687881e+01   5.7065374e+00
   2.7461504e+01  -2.5315862e+01   5.0000000e+01  -3.4164714e+01   1.2758011e+01  -5.5670721e+00
   2.7466828e+01  -2.5187521e+01   5.0000000e+01  -3.3352365e+01   1.1693142e+01  -1.9491796e+01
   2.7468106e+01  -2.5059095e+01   5.0000000e+01  -2.7313856e+01   9.5866025e+00  -3.1449656e+01
   2.7465348e+01  -2.4930688e+01   5.0000000e+01  -1.8875222e+01   5.6787325e+00  -3.8270812e+01
   2.7458571e+01  -2.4802405e+01   5.0000000e+01  -1.1676536e+01   6.8553142e-01  -3.9588494e+01
   2.7447792e+01  -2.4674347e+01   5.0000000e+01  -7.9139084e+00  -3.7182198e+00  -3.8200316e+01
   2.7433031e+01  -2.4546619e+01   5.0000000e+01  -6.3657374e+00  -6.4136295e+00  -3.7466731e+01
   2.7414313e+01  -2.4419322e+01   5.0000000e+01  -4.3322459e+00  -7.1157239e+00  -3.7542660e+01
   2.7391663e+01  -2.4292559e+01   5.0000000e+01  -1.3560910e+00  -5.7826204e+00  -3.6451317e+01
   2.7365113e+01  -2.4166431e+01   5.0000000e+01   1.1902759e+00  -2.4492734e+00  -3.3728870e+01
   2.7334694e+01  -2.4041037e+01   5.0000000e+01   2.6558043e+00   2.6800673e+00  -3.0450773e+01
   2.7300442e+01  -2.3916477e+01   5.0000000e+01   3.4636490e+00   9.1755308e+00  -2.7258128e+01
   2.7262393e+01  -2.3792850e+01   5.0000000e+01   3.9387106e+00   1.6208308e+01  -2.3714560e+01
   2.7220590e+01  -2.3670253e+01   5.0000000e+01   3.2320026e+00   2.2293075e+01  -1.9265750e+01
   2.7175073e+01  -2.3548782e+01   5.0000000e+01   5.5352912e-02   2.5496656e+01  -1.5032590e+01
   2.7125890e+01  -2.3428533e+01   5.0000000e+01  -4.6580728e+00   2.4786620e+01  -1.3616126e+01
   2.7073088e+01  -2.3309600e+01   5.0000000e+01  -7.2960192e+00   2.1098987e+01  -1.5962878e+01
   2.7016717e+01  -2.3192075e+01   5.0000000e+01  -5.1756459e+00   1.6303131e+01  -1.9521032e+01
   2.6956831e+01  -2.3076050e+01   5.0000000e+01   5.6917396e-01   1.1736481e+01  -2.0652817e+01
   2.6893483e+01  -2.2961615e+01   5.0000000e+01   6.7043465e+00   8.0995533e+00  -1.7890970e+01
   2.6826733e+01  -2.2848859e+01   5.0000000e+01   1.0801060e+01   5.7960848e+00  -1.1981013e+01
   2.6756638e+01  -2.2737870e+01   5.0000000e+01   1.1504268e+01   5.0568225e+00  -4.6007964e+00
   2.6683260e+01  -2.2628732e+01   5.0000000e+01   8.1914162e+00   5.6796415e+00   1.8592156e+00
   2.6606664e+01  -2.2521530e+01   5.0000000e+01   1.4848334e+00   6.6352411e+00   5.0786084e+00
   2.6526914e+01  -2.2416347e+01   5.0000000e+01  -6.8191457e+00   6.5248392e+00   4.0102442e+00
   2.6444079e+01  -2.2313262e+01   5.0000000e+01  -1.4244326e+01   4.4108717e+00  -8.1043432e-01
   2.6358228e+01  -2.2212356e+01   5.0000000e+01  -1.8611697e+01   2.4702827e-01  -7.2621335e+00
   2.6269433e+01  -2.2113705e+01   5.0000000e+01  -1.9458691e+01  -5.0318244e+00  -1.2723226e+01
   2.6177765e+01  -2.2017385e+01   5.0000000e+01  -1.7800641e+01  -1.0157385e+01  -1.5805627e+01
   2.6083302e+01  -2.1923469e+01   5.0000000e+01  -1.4812783e+01  -1.4235954e+01  -1.6355285e+01
   2.5986118e+01  -2.1832028e+01   5.0000000e+01  -1.1531484e+01  -1.6747142e+01  -1.4840992e+01
   2.5886293e+01  -2.1743133e+01   5.0000000e+01  -8.7320397e+00  -1.7636284e+01  -1.2316475e+01
   2.5783907e+01  -2.1656850e+01   5.0000000e+01  -6.6508781e+00  -1.7328854e+01  -9.8642908e+00
   2.5679040e+01  -2.1573246e+01   5.0000000e+01  -5.2929031e+00  -1.6461490e+01  -8.2191370e+00
   2.5571775e+01  -2.1492382e+01   5.0000000e+01  -4.5017251e+00  -1.5991277e+01  -7.7351294e+00
   2.5462197e+01  -2.1414322e+01   5.0000000e+01  -3.8366856e+00  -1.6821075e+01  -7.9046384e+00
   2.5350392e+01  -2.1339122e+01   5.0000000e+01  -2.9691166e+00  -1.8954047e+01  -7.7311997e+00
   2.5236446e+01  -2.1266841e+01   5.0000000e+01  -1.7041869e+00  -2.1749506e+01  -6.6869174e+00
   2.5120447e+01  -2.1197533e+01   5.0000000e+01   2.6934323e-01  -2.4522084e+01  -4.4154426e+00
   2.5002485e+01  -2.1131250e+01   5.0000000e+01   2.8182645e+00  -2.6438161e+01  -4.8863038e-01
   2.4882651e+01  -2.1068041e+01   5.0000000e+01   5.2066187e+00  -2.6811051e+01   4.8552737e+00
   2.4761035e+01  -2.1007955e+01   5.0000000e+01   7.0421471e+00  -2.5423857e+01   1.0995309e+01
   2.4637732e+01  -2.0951037e+01   5.0000000e+01   8.3423342e+00  -2.1743219e+01   1.7471602e+01
   2.4512833e+01  -2.0897328e+01   5.0000000e+01   8.7623072e+00  -1.5097838e+01   2.2833946e+01
   2.4386435e+01  -2.0846871e+01   5.0000000e+01   7.9167914e+00  -6.5988674e+00   2.4673049e+01
   2.4258631e+01  -2.0799701e+01   5.0000000e+01   6.0494497e+00   9.3047378e-01   2.2148243e+01
   2.4129519e+01  -2.0755855e+01   5.0000000e+01   3.7656779e+00   5.3773396e+00   1.6803887e+01
   2.3999195e+01  -2.0715366e+01   5.0000000e+01   1.5219867e+00   6.3791542e+00   1.1024900e+01
   2.3867758e+01  -2.0678263e+01   5.0000000e+01  -5.9986127e-01   5.0256904e+00   6.8150907e+00
   2.3735304e+01  -2.0644575e+01   5.0000000e+01  -2.7825632e+00   3.3111362e+00   4.6613838e+00
   2.3601934e+01  -2.0614326e+01   5.0000000e+01  -5.0363816e+00   2.5424626e+00   3.2595938e+00
   2.3467746e+01  -2.0587540e+01   5.0000000e+01  -7.0028733e+00   2.4979297e+00   1.2552540e+00
   2.3332841e+01  -2.0564237e+01   5.0000000e+01  -8.2471798e+00   2.4480124e+00  -1.6153968e+00
   2.3197319e+01  -2.0544433e+01   5.0000000e+01  -8.7123861e+00   1.8282892e+00  -4.9479354e+00
   2.3061279e+01  -2.0528143e+01   5.0000000e+01  -8.9425538e+00   2.6916605e-01  -7.9690540e+00
   2.2924824e+01  -2.0515380e+01   5.0000000e+01  -9.7311863e+00  -2.1134192e+00  -9.9501719e+00
   2.2788054e+01  -2.0506154e+01   5.0000000e+01  -1.1395533e+01  -4.8181015e+00  -1.0923627e+01
   2.2651071e+01  -2.0500470e+01   5.0000000e+01  -1.3356882e+01  -7.5604161e+00  -1.1627494e+01
   2.2513977e+01  -2.0498334e+01   5.0000000e+01  -1.4493077e+01  -1.0557164e+01  -1.2628457e+01
   2.2376871e+01  -2.0499747e+01   5.0000000e+01  -1.3997318e+01  -1.4023466e+01  -1.3668875e+01
   2.2239857e+01  -2.0504707e+01   5.0000000e+01  -1.1874420e+01  -1.7567861e+01  -1.4146678e+01
   2.2103036e+01  -2.0513212e+01   5.0000000e+01  -8.7337796e+00  -2.0604487e+01  -1.4077878e+01
   2.1966508e+01  -2.0525255e+01   5.0000000e+01  -5.3339888e+00  -2.3273360e+01  -1.4052799e+01
   2.1830376e+01  -2.0540826e+01   5.0000000e+01  -2.2497495e+00  -2.6532814e+01  -1.4153205e+01
   2.1694740e+01  -2.0559915e+01   5.0000000e+01   2.9048467e-01  -3.1125583e+01  -1.3274735e+01
   2.1559701e+01  -2.0582506e+01   5.0000000e+01   2.4107993e+00  -3.6561499e+01  -1.0049011e+01
   2.1425359e+01  -2.0608584e+01   5.0000000e+01   4.3496739e+00  -4.1571237e+01  -4.1790911e+00
   2.1291814e+01  -2.0638128e+01   5.0000000e+01   6.1486428e+00  -4.5063853e+01   3.7745232e+00
   2.1159165e+01  -2.0671117e+01   5.0000000e+01   7.7520605e+00  -4.6083632e+01   1.2999861e+01
   2.1027513e+01  -2.0707526e+01   5.0000000e+01   9.3055687e+00  -4.3997670e+01   2.2143789e+01
   2.0896954e+01  -2.0747327e+01   5.0000000e+01   1.1056789e+01  -3.9249337e+01   2.9573576e+01
   2.0767587e+01  -2.0790492e+01   5.0000000e+01   1.3025153e+01  -3.3126036e+01   3.4274518e+01
   2.0639509e+01  -2.0836986e+01   5.0000000e+01   1.4856705e+01  -2.6929058e+01   3.6122499e+01
   2.0512816e+01  -2.0886777e+01   5.0000000e+01   1.6015245e+01  -2.1487807e+01   3.5714973e+01
   2.0387604e+01  -2.0939826e+01   5.0000000e+01   1.6187890e+01  -1.7004065e+01   3.3890649e+01
   2.0263968e+01  -2.0996093e+01   5.0000000e+01   1.5405002e+01  -1.3507258e+01   3.1258233e+01
   2.0142001e+01  -2.1055537e+01   5.0000000e+01   1.3884091e+01  -1.1178036e+01   2.8556750e+01
   2.0021796e+01  -2.1118113e+01   5.0000000e+01   1.2068581e+01  -9.7431329e+00   2.6714993e+01
   1.9903445e+01  -2.1183773e+01   5.0000000e+01   1.0513109e+01  -8.4163541e+00   2.5884033e+01
   1.9787039e+01  -2.1252469e+01   5.0000000e+01   9.4319733e+00  -6.8013433e+00   2.5414557e+01
   1.9672667e+01  -2.1324148e+01   5.0000000e+01   8.7733942e+00  -4.9524001e+00   2.4859177e+01
   1.9560418e+01  -2.1398757e+01   5.0000000e+01   8.6351768e+00  -2.8604199e+00   2.3918802e+01
   1.9450379e+01  -2.1476239e+01   5.0000000e+01   9.0294184e+00  -6.4533073e-01   2.2047828e+01
   1.9342636e+01  -2.1556536e+01   5.0000000e+01   9.5631079e+00   1.3659828e+00   1.8907356e+01
   1.9237273e+01  -2.1639587e+01   5.0000000e+01   9.6127574e+00   2.8712456e+00   1.4603907e+01
   1.9134374e+01  -2.1725329e+01   5.0000000e+01   8.5919289e+00   3.5109595e+00   9.8319094e+00
   1.9034020e+01  -2.1813697e+01   5.0000000e+01   6.5381345e+00   3.2217062e+00   5.9611332e+00
   1.8936292e+01  -2.1904624e+01   5.0000000e+01   4.3769573e+00   2.5608029e+00   3.8380763e+00
   1.8841268e+01  -2.1998041e+01   5.0000000e+01   2.9249709e+00   1.9955937e+00   3.0166220e+00
   1.8749024e+01  -2.2093877e+01   5.0000000e+01   2.2201844e+00   1.5524001e+00   2.8407497e+00
   1.8659637e+01  -2.2192059e+01   5.0000000e+01   1.9729522e+00   1.2568376e+00   3.0440327e+00
   1.8573180e+01  -2.2292512e+01   5.0000000e+01   1.7928211e+00   1.0812018e+00   3.4734177e+00
   1.8489724e+01  -2.2395159e+01   5.0000000e+01   1.3661112e+00   8.1404275e-01   4.3032168e+00
   1.8409340e+01  -2.2499921e+01   5.0000000e+01   8.8552827e-01   4.3242943e-01   5.9094900e+00
   1.8332096e+01  -2.2606718e+01   5.0000000e+01   8.2571361e-01   2.0955895e-01   8.2048226e+00
   1.8258057e+01  -2.2715467e+01   5.0000000e+01   1.3406987e+00   3.2406603e-01   1.0620330e+01
   1.8187288e+01  -2.2826087e+01   5.0000000e+01   2.2105800e+00   6.2514003e-01   1.2783235e+01
   1.8119850e+01  -2.2938489e+01   5.0000000e+01   3.3638577e+00   9.8284472e-01   1.4804749e+01
   1.8055804e+01  -2.3052589e+01   5.0000000e+01   5.0385432e+00   1.6250925e+00   1.6622198e+01
   1.7995208e+01  -2.3168297e+01   5.0000000e+01   7.1638313e+00   2.8468404e+00   1.7673127e+01
   1.7938116e+01  -2.3285523e+01   5.0000000e+01   9.1793111e+00   4.6868145e+00   1.7530882e+01
   1.7884582e+01  -2.3404177e+01   5.0000000e+01   1.0516724e+01   6.9124907e+00   1.6212411e+01
   1.7834657e+01  -2.3524166e+01   5.0000000e+01   1.0843805e+01   9.0154808e+00   1.4098808e+01
   1.7788390e+01  -2.3645395e+01   5.0000000e+01   1.0252931e+01   1.0454703e+01   1.1807675e+01
   1.7745825e+01  -2.3767771e+01   5.0000000e+01   9.0658653e+00   1.1056546e+01   9.7189084e+00
   1.7707008e+01  -2.3891196e+01   5.0000000e+01   7.2168012e+00   1.0942038e+01   8.0923151e+00
   1.7671979e+01  -2.4015573e+01   5.0000000e+01   4.5802043e+00   1.0190046e+01   7.6573140e+00
   1.7640775e+01  -2.4140805e+01   5.0000000e+01   1.7367889e+00   8.9175095e+00   9.2472114e+00
   1.7613434e+01  -2.4266792e+01   5.0000000e+01  -2.0580757e-01   7.5843959e+00   1.2958061e+01
   1.7589987e+01  -2.4393434e+01   5.0000000e+01  -3.1355397e-01   6.8530769e+00   1.7919475e+01
   1.7570465e+01  -2.4520629e+01   5.0000000e+01   1.6993136e+00   7.1414275e+00   2.2712981e+01
   1.7554895e+01  -2.4648278e+01   5.0000000e+01   5.3486134e+00   8.4288843e+00   2.5974781e+01
   1.7543302e+01  -2.4776277e+01   5.0000000e+01   9.4506982e+00   1.0380653e+01   2.6944642e+01
   1.7535707e+01  -2.4904523e+01   5.0000000e+01   1.2746840e+01   1.2614719e+01   2.5981521e+01
   1.7532129e+01  -2.5032913e+01   5.0000000e+01   1.4987053e+01   1.4834279e+01   2.4055738e+01
   1.7532583e+01  -2.5161344e+01   5.0000000e+01   1.6712743e+01   1.6695304e+01   2.1448684e+01
   1.7537082e+01  -2.5289710e+01   5.0000000e+01   1.8037827e+01   1.7736891e+01   1.7864821e+01
   1.7545634e+01  -2.5417909e+01   5.0000000e+01   1.8551405e+01   1.7592749e+01   1.3464069e+01
   1.7558246e+01  -2.5545834e+01   5.0000000e+01   1.7999858e+01   1.6282122e+01   9.0014319e+00
   1.7574920e+01  -2.5673382e+01   5.0000000e+01   1.6685048e+01   1.4207350e+01   5.1359170e+00
   1.7595657e+01  -2.5800448e+01   5.0000000e+01   1.4953325e+01   1.1897010e+01   1.6630601e+00
   1.7620451e+01  -2.5926927e+01   5.0000000e+01   1.2256513e+01   9.8032173e+00  -1.7341613e+00
   1.7649296e+01  -2.6052713e+01   5.0000000e+01   8.0461966e+00   7.9789960e+00  -4.2128000e+00
   1.7682181e+01  -2.6177704e+01   5.0000000e+01   2.9391194e+00   6.0376034e+00  -4.8925662e+00
   1.7719093e+01  -2.6301795e+01   5.0000000e+01  -2.3471857e+00   3.7873428e+00  -3.7934432e+00
   1.7760012e+01  -2.6424881e+01   5.0000000e+01  -7.3778319e+00   1.3346408e+00  -8.0225448e-01
   1.7804919e+01  -2.6546861e+01   5.0000000e+01  -1.1305397e+01  -1.2673156e+00   3.9672210e+00
   1.7853789e+01  -2.6667631e+01   5.0000000e+01  -1.3681278e+01  -3.6154619e+00   9.6015202e+00
   1.7906593e+01  -2.6787090e+01   5.0000000e+01  -1.4723991e+01  -4.8454883e+00   1.5702840e+01
   1.7963299e+01  -2.6905135e+01   5.0000000e+01  -1.4192308e+01  -4.3593757e+00   2.2558339e+01
   1.8023872e+01  -2.7021668e+01   5.0000000e+01  -1.1334469e+01  -2.2697232e+00   2.9882701e+01
   1.8088273e+01  -2.7136588e+01   5.0000000e+01  -5.7802492e+00   6.1463179e-01   3.6380050e+01
   1.8156458e+01  -2.7249797e+01   5.0000000e+01   1.6857239e+00   3.3852057e+00   4.0344293e+01
   1.8228383e+01  -2.7361197e+01   5.0000000e+01   9.2172203e+00   5.7475948e+00   4.1125849e+01
   1.8303995e+01  -2.7470694e+01   5.0000000e+01   1.5382041e+01   7.6083744e+00   3.9772620e+01
   1.8383241e+01  -2.7578191e+01   5.0000000e+01   2.0122576e+01   8.4214181e+00   3.7541955e+01
   1.8466065e+01  -2.7683597e+01   5.0000000e+01   2.4010842e+01   7.6005389e+00   3.4547053e+01
   1.8552404e+01  -2.7786818e+01   5.0000000e+01   2.7352589e+01   5.2731242e+00   3.0118223e+01
   1.8642194e+01  -2.7887765e+01   5.0000000e+01   3.0042140e+01   2.3307879e+00   2.3754072e+01
   1.8735367e+01  -2.7986350e+01   5.0000000e+01   3.1662030e+01  -2.2312273e-01   1.5535245e+01
   1.8831850e+01  -2.8082485e+01   5.0000000e+01   3.1614535e+01  -1.7397231e+00   6.0617321e+00
   1.8931569e+01  -2.8176085e+01   5.0000000e+01   2.9452500e+01  -1.9433319e+00  -3.6298128e+00
   1.9034443e+01  -2.8267069e+01   5.0000000e+01   2.5162515e+01  -9.4190617e-01  -1.2397094e+01
   1.9140391e+01  -2.8355355e+01   5.0000000e+01   1.9092584e+01   1.0274232e+00  -1.9427056e+01
   1.9249326e+01  -2.8440864e+01   5.0000000e+01   1.1758647e+01   3.9838919e+00  -2.4114057e+01
   1.9361160e+01  -2.8523521e+01   5.0000000e+01   3.7739570e+00   8.0374556e+00  -2.5556284e+01
   1.9475799e+01  -2.8603251e+01   5.0000000e+01  -3.8712021e+00   1.2496951e+01  -2.2513841e+01
   1.9593148e+01  -2.8679982e+01   5.0000000e+01  -9.6968813e+00   1.5212642e+01  -1.4974085e+01
   1.9713108e+01  -2.8753646e+01   5.0000000e+01  -1.2877457e+01   1.4212612e+01  -5.7181799e+00
   1.9835577e+01  -2.8824176e+01   5.0000000e+01  -1.4299054e+01   1.0081106e+01   1.7346162e+00
   1.9960450e+01  -2.8891508e+01   5.0000000e+01  -1.5598689e+01   5.0002212e+00   6.3674319e+00
   2.0087619e+01  -2.8955581e+01   5.0000000e+01  -1.7631887e+01   2.5073707e-01   9.2723297e+00
   2.0216974e+01  -2.9016337e+01   5.0000000e+01  -2.0273976e+01  -4.1041181e+00   1.1448125e+01
   2.0348402e+01  -2.9073720e+01   5.0000000e+01  -2.3130527e+01  -8.2855110e+00   1.2952859e+01
   2.0481786e+01  -2.9127678e+01   5.0000000e+01  -2.5954638e+01  -1.2095630e+01   1.3397841e+01
   2.0617009e+01  -2.9178162e+01   5.0000000e+01  -2.8410572e+01  -1.5063846e+01   1.2775505e+01
   2.0753950e+01  -2.9225125e+01   5.0000000e+01  -3.0165187e+01  -1.7133586e+01   1.1243958e+01
   2.0892486e+01  -2.9268524e+01   5.0000000e+01  -3.1545291e+01  -1.8387111e+01   8.8070677e+00
   2.1032494e+01  -2.9308319e+01   5.0000000e+01  -3.3420562e+01  -1.8861209e+01   6.0833455e+00
   2.1173847e+01  -2.9344474e+01   5.0000000e+01  -3.6169663e+01  -1.9243554e+01   4.0799193e+00
   2.1316416e+01  -2.9376955e+01   5.0000000e+01  -3.9069794e+01  -2.0686296e+01   2.9346925e+00
   2.1460072e+01  -2.9405732e+01   5.0000000e+01  -4.0895806e+01  -2.4167802e+01   1.5520067e+00
   2.1604683e+01  -2.9430779e+01   5.0000000e+01  -4.1135551e+01  -2.9900426e+01  -2.3895006e+00
   2.1750119e+01  -2.9452072e+01   5.0000000e+01  -4.0482090e+01  -3.5834682e+01  -1.1351638e+01
   2.1896245e+01  -2.9469592e+01   5.0000000e+01  -4.0230850e+01  -3.7969396e+01  -2.4800034e+01
   2.2042927e+01  -2.9483322e+01   5.0000000e+01  -4.1312776e+01  -3.4455110e+01  -3.8668000e+01
   2.2190030e+01  -2.9493249e+01   5.0000000e+01  -4.3467457e+01  -2.7194747e+01  -5.0525763e+01
   2.2337419e+01  -2.9499366e+01   5.0000000e+01  -4.4556376e+01  -1.6585095e+01  -6.1935767e+01
   2.2484958e+01  -2.9501665e+01   5.0000000e+01  -4.1048334e+01   6.2044861e-01  -7.1741167e+01
   2.2632511e+01  -2.9500144e+01   5.0000000e+01  -3.1253053e+01   2.3775109e+01  -7.2842542e+01
   2.2779941e+01  -2.9494806e+01   5.0000000e+01  -1.7997462e+01   4.4915551e+01  -6.0957625e+01
   2.2927114e+01  -2.9485655e+01   5.0000000e+01  -5.8036088e+00   5.6862096e+01  -4.0411692e+01
   2.3073893e+01  -2.9472699e+01   5.0000000e+01   3.3116321e+00   5.8881128e+01  -1.8477716e+01
   2.3220143e+01  -2.9455950e+01   5.0000000e+01   9.4471853e+00   5.4005809e+01   1.4262215e-02
   2.3365730e+01  -2.9435425e+01   5.0000000e+01   1.2930512e+01   4.6220350e+01   1.2927405e+01
   2.3510521e+01  -2.9411142e+01   5.0000000e+01   1.4139573e+01   3.9187500e+01   2.0863195e+01
   2.3654382e+01  -2.9383123e+01   5.0000000e+01   1.3456517e+01   3.4360469e+01   2.6582721e+01
   2.3797183e+01  -2.9351395e+01   5.0000000e+01   1.1241401e+01   3.0489452e+01   3.2369307e+01
   2.3938794e+01  -2.9315986e+01   5.0000000e+01   8.1395602e+00   2.5732401e+01   3.8097261e+01
   2.4079086e+01  -2.9276930e+01   5.0000000e+01   4.9559519e+00   1.9975100e+01   4.2363285e+01
   2.4217933e+01  -2.9234263e+01   5.0000000e+01   2.3446350e+00   1.4405982e+01   4.4746708e+01
   2.4355209e+01  -2.9188023e+01   5.0000000e+01   7.0564284e-01   9.7560320e+00   4.5887450e+01
   2.4490792e+01  -2.9138253e+01   5.0000000e+01   2.2816974e-01   6.0401734e+00   4.6515629e+01
   2.4624561e+01  -2.9085000e+01   5.0000000e+01   8.2358222e-01   2.7279855e+00   4.7205165e+01
   2.4756397e+01  -2.9028311e+01   5.0000000e+01   1.9642269e+00  -1.0861511e+00   4.7796926e+01
   2.4886184e+01  -2.8968238e+01   5.0000000e+01   2.9596779e+00  -5.7097652e+00   4.7235765e+01
   2.5013808e+01  -2.8904837e+01   5.0000000e+01   3.4340692e+00  -1.0457544e+01   4.4569002e+01
   2.5139158e+01  -2.8838164e+01   5.0000000e+01   3.4504625e+00  -1.4222361e+01   3.9777210e+01
   2.5262125e+01  -2.8768281e+01   5.0000000e+01   3.2022108e+00  -1.6353883e+01   3.3853192e+01
   2.5382605e+01  -2.8695251e+01   5.0000000e+01   2.6586337e+00  -1.7077112e+01   2.7680465e+01
   2.5500495e+01  -2.8619139e+01   5.0000000e+01   2.0563411e+00  -1.6385054e+01   2.1241532e+01
   2.5615694e+01  -2.8540015e+01   5.0000000e+01   2.2758563e+00  -1.3588429e+01   1.5196574e+01
   2.5728107e+01  -2.8457949e+01   5.0000000e+01   3.6549254e+00  -8.9820613e+00   1.1579769e+01
   2.6355445e+01  -2.8089973e+01   5.0000000e+01  -3.2837036e-01  -2.9332541e+00   2.5615234e+01
   2.6449408e+01  -2.7991713e+01   5.0000000e+01  -1.8611820e+00  -4.0831679e+00   2.7138774e+01
   2.6540080e+01  -2.7891132e+01   5.0000000e+01  -3.9086665e+00  -4.6621169e+00   2.8376090e+01
   2.6627397e+01  -2.7788315e+01   5.0000000e+01  -6.3537207e+00  -5.2793977e+00   2.8527645e+01
   2.6711295e+01  -2.7683346e+01   5.0000000e+01  -8.3868099e+00  -5.7860065e+00   2.6739126e+01
   2.6791717e+01  -2.7576312e+01   5.0000000e+01  -8.8956249e+00  -5.4247506e+00   2.3156830e+01
   2.6868606e+01  -2.7467302e+01   5.0000000e+01  -7.1494140e+00  -3.4162910e+00   1.9373797e+01
   2.6941911e+01  -2.7356404e+01   5.0000000e+01  -3.6827375e+00   2.2814883e-01   1.7912717e+01
   2.7011584e+01  -2.7243711e+01   5.0000000e+01  -5.5576251e-01   4.4908695e+00   2.0336031e+01
   2.7077579e+01  -2.7129314e+01   5.0000000e+01  -1.2584401e-01   8.2182456e+00   2.6049112e+01
   2.7139855e+01  -2.7013306e+01   5.0000000e+01  -4.0135346e+00   1.0513077e+01   3.2800320e+01
   2.7198373e+01  -2.6895781e+01   5.0000000e+01  -1.2305506e+01   1.0641708e+01   3.6718013e+01
   2.7253098e+01  -2.6776834e+01   5.0000000e+01  -2.1782025e+01   9.0337397e+00   3.4039564e+01
   2.7303999e+01  -2.6656561e+01   5.0000000e+01  -2.7500677e+01   7.5614740e+00   2.5693505e+01
   2.7351048e+01  -2.6535059e+01   5.0000000e+01  -2.8194970e+01   7.6446360e+00   1.6786110e+01
   2.7394220e+01  -2.6412423e+01   5.0000000e+01  -2.6509201e+01   9.0361819e+00   1.0347427e+01
   2.7433492e+01  -2.6288753e+01   5.0000000e+01  -2.4080618e+01   1.0615902e+01   5.9748055e+00
   2.7468848e+01  -2.6164146e+01   5.0000000e+01  -2.0719657e+01   1.1530135e+01   3.4445534e+00
   2.7500273e+01  -2.6038700e+01   5.0000000e+01  -1.6875725e+01   1.1745687e+01   3.4027076e+00
   2.7527753e+01  -2.5912516e+01   5.0000000e+01  -1.3948198e+01   1.1636105e+01   5.9854571e+00
   2.7551281e+01  -2.5785691e+01   5.0000000e+01  -1.3665575e+01   1.1241622e+01   1.0295869e+01
   2.7570851e+01  -2.5658325e+01   5.0000000e+01  -1.7387654e+01   1.0557544e+01   1.3811541e+01
   2.7586461e+01  -2.5530518e+01   5.0000000e+01  -2.4353045e+01   1.0124225e+01   1.2878503e+01
   2.7598111e+01  -2.5402369e+01   5.0000000e+01  -3.1076934e+01   1.0722252e+01   5.4903286e+00
   2.7605805e+01  -2.5273977e+01   5.0000000e+01  -3.3862886e+01   1.2608092e+01  -6.5664491e+00
   2.7609551e+01  -2.5145441e+01   5.0000000e+01  -3.1803322e+01   1.4925164e+01  -1.9360615e+01
   2.7609357e+01  -2.5016861e+01   5.0000000e+01  -2.6438075e+01   1.5941215e+01  -3.0023314e+01
   2.7605236e+01  -2.4888335e+01   5.0000000e+01  -1.9704728e+01   1.4443161e+01  -3.7250152e+01
   2.7597204e+01  -2.4759962e+01   5.0000000e+01  -1.3555149e+01   1.0986861e+01  -4.0858508e+01
   2.7585278e+01  -2.4631839e+01   5.0000000e+01  -9.1208129e+00   7.4878982e+00  -4.2450868e+01
   2.7569480e+01  -2.4504064e+01   5.0000000e+01  -5.2812402e+00   5.5708247e+00  -4.3766480e+01
   2.7549834e+01  -2.4376734e+01   5.0000000e+01  -5.3061969e-01   5.5896621e+00  -4.4199495e+01
   2.7526364e+01  -2.4249945e+01   5.0000000e+01   4.6724312e+00   7.2728897e+00  -4.2275283e+01
   2.7499101e+01  -2.4123793e+01   5.0000000e+01   9.0902228e+00   1.0636367e+01  -3.7910173e+01
   2.7468076e+01  -2.3998372e+01   5.0000000e+01   1.2239617e+01   1.5763683e+01  -3.1854852e+01
   2.7433323e+01  -2.3873777e+01   5.0000000e+01   1.4064440e+01   2.2130453e+01  -2.4429229e+01
   2.7394878e+01  -2.3750101e+01   5.0000000e+01   1.3735897e+01   2.8449903e+01  -1.5409282e+01
   2.7352780e+01  -2.3627436e+01   5.0000000e+01   9.1577289e+00   3.2799012e+01  -6.0671332e+00
   2.7307070e+01  -2.3505874e+01   5.0000000e+01  -4.6508562e-02   3.3192714e+01  -7.6600841e-01
   2.7257792e+01  -2.3385504e+01   5.0000000e+01  -9.3480032e+00   2.9131564e+01  -3.0172556e+00
   2.7204991e+01  -2.3266416e+01   5.0000000e+01  -1.2753424e+01   2.2493642e+01  -1.0468488e+01
   2.7148715e+01  -2.3148697e+01   5.0000000e+01  -8.9372900e+00   1.5993090e+01  -1.7082039e+01
   2.7089014e+01  -2.3032435e+01   5.0000000e+01  -1.4771447e+00   1.1060713e+01  -1.8978102e+01
   2.7025940e+01  -2.2917715e+01   5.0000000e+01   5.5070961e+00   7.6348024e+00  -1.6083181e+01
   2.6959549e+01  -2.2804620e+01   5.0000000e+01   9.8868460e+00   5.3550546e+00  -9.9127930e+00
   2.6889895e+01  -2.2693235e+01   5.0000000e+01   1.0771960e+01   4.4837856e+00  -2.0920106e+00
   2.6817037e+01  -2.2583640e+01   5.0000000e+01   7.5464261e+00   5.4724603e+00   5.1709240e+00
   2.6741035e+01  -2.2475915e+01   5.0000000e+01   4.3717519e-01   7.7202235e+00   9.0571421e+00
   2.6661951e+01  -2.2370139e+01   5.0000000e+01  -8.8005554e+00   9.4615151e+00   7.5370863e+00
   2.6579849e+01  -2.2266389e+01   5.0000000e+01  -1.7237553e+01   8.9045794e+00   7.3631513e-01
   2.6494794e+01  -2.2164739e+01   5.0000000e+01  -2.2190452e+01   5.3077747e+00  -8.6916114e+00
   2.6406854e+01  -2.2065263e+01   5.0000000e+01  -2.2952135e+01  -5.1582089e-01  -1.7059713e+01
   2.6316096e+01  -2.1968034e+01   5.0000000e+01  -2.0727029e+01  -6.8808176e+00  -2.2185954e+01
   2.6222593e+01  -2.1873121e+01   5.0000000e+01  -1.7035622e+01  -1.2509837e+01  -2.3786060e+01
   2.6126416e+01  -2.1780593e+01   5.0000000e+01  -1.3142712e+01  -1.6699999e+01  -2.2349728e+01
   2.6027637e+01  -2.1690516e+01   5.0000000e+01  -1.0006961e+01  -1.9100473e+01  -1.9023415e+01
   2.5926334e+01  -2.1602955e+01   5.0000000e+01  -7.8308471e+00  -1.9884151e+01  -1.5176231e+01
   2.5822581e+01  -2.1517973e+01   5.0000000e+01  -6.4913752e+00  -1.9406704e+01  -1.1677890e+01
   2.5716457e+01  -2.1435631e+01   5.0000000e+01  -6.0214237e+00  -1.8212590e+01  -9.3993240e+00
   2.5608040e+01  -2.1355988e+01   5.0000000e+01  -6.1022681e+00  -1.7550453e+01  -8.9098198e+00
   2.5497412e+01  -2.1279101e+01   5.0000000e+01  -6.1221102e+00  -1.8529320e+01  -9.4675279e+00
   2.5384653e+01  -2.1205024e+01   5.0000000e+01  -5.6072591e+00  -2.1111108e+01  -9.8533434e+00
   2.5269847e+01  -2.1133811e+01   5.0000000e+01  -4.0283871e+00  -2.4611086e+01  -9.1631977e+00
   2.5153077e+01  -2.1065512e+01   5.0000000e+01  -1.2779298e+00  -2.7986480e+01  -6.4290249e+00
   2.5034429e+01  -2.1000176e+01   5.0000000e+01   1.7143422e+00  -2.9907299e+01  -1.4912360e+00
   2.4913988e+01  -2.0937849e+01   5.0000000e+01   4.0599503e+00  -2.9909235e+01   4.5348923e+00
   2.4791842e+01  -2.0878576e+01   5.0000000e+01   5.7796373e+00  -2.8343190e+01   1.1132885e+01
   2.4668078e+01  -2.0822399e+01   5.0000000e+01   6.8184014e+00  -2.4557134e+01   1.8469266e+01
   2.4542785e+01  -2.0769358e+01   5.0000000e+01   6.6040312e+00  -1.7415857e+01   2.4883631e+01
   2.4416053e+01  -2.0719489e+01   5.0000000e+01   5.0349602e+00  -8.0037787e+00   2.7350131e+01
   2.4287972e+01  -2.0672830e+01   5.0000000e+01   2.7634555e+00   5.5021181e-01   2.4831792e+01
   2.4158634e+01  -2.0629412e+01   5.0000000e+01   4.7908236e-01   5.8757799e+00   1.9035063e+01
   2.4028130e+01  -2.0589266e+01   5.0000000e+01  -1.5514042e+00   7.5602220e+00   1.2531231e+01
   2.3896552e+01  -2.0552422e+01   5.0000000e+01  -3.4847253e+00   6.6938091e+00   7.3367266e+00
   2.3763993e+01  -2.0518904e+01   5.0000000e+01  -5.5422073e+00   5.1282396e+00   4.0299251e+00
   2.3630548e+01  -2.0488737e+01   5.0000000e+01  -7.5481277e+00   4.0920501e+00   1.6940181e+00
   2.3496310e+01  -2.0461942e+01   5.0000000e+01  -8.9976954e+00   3.4592249e+00  -6.1389209e-01
   2.3361374e+01  -2.0438538e+01   5.0000000e+01  -9.5831276e+00   2.7381082e+00  -2.8456849e+00
   2.3225834e+01  -2.0418541e+01   5.0000000e+01  -9.6210629e+00   1.8990552e+00  -4.6730125e+00
   2.3089785e+01  -2.0401965e+01   5.0000000e+01  -1.0012493e+01   1.0279941e+00  -6.3186188e+00
   2.2953324e+01  -2.0388823e+01   5.0000000e+01  -1.1579793e+01  -8.5108801e-02  -8.3792103e+00
   2.2816545e+01  -2.0379124e+01   5.0000000e+01  -1.4249772e+01  -1.9086065e+00  -1.1235539e+01
   2.2679544e+01  -2.0372873e+01   5.0000000e+01  -1.6857433e+01  -4.9687948e+00  -1.4693540e+01
   2.2542418e+01  -2.0370077e+01   5.0000000e+01  -1.7822548e+01  -9.5142992e+00  -1.7850836e+01
   2.2405262e+01  -2.0370736e+01   5.0000000e+01  -1.6285186e+01  -1.5030405e+01  -1.9386738e+01
   2.2268172e+01  -2.0374850e+01   5.0000000e+01  -1.2689000e+01  -2.0260609e+01  -1.8586881e+01
   2.2131245e+01  -2.0382417e+01   5.0000000e+01  -8.1830246e+00  -2.4190250e+01  -1.6078427e+01
   2.1994576e+01  -2.0393431e+01   5.0000000e+01  -3.6855570e+00  -2.6941446e+01  -1.3166788e+01
   2.1858260e+01  -2.0407884e+01   5.0000000e+01   2.8131935e-01  -2.9582142e+01  -1.0577559e+01
   2.1722394e+01  -2.0425766e+01   5.0000000e+01   3.2983711e+00  -3.3182106e+01  -7.8181968e+00
   2.1587073e+01  -2.0447065e+01   5.0000000e+01   5.1710872e+00  -3.7843916e+01  -3.6287140e+00
   2.1452392e+01  -2.0471765e+01   5.0000000e+01   6.2256781e+00  -4.2606441e+01   2.8209769e+00
   2.1318446e+01  -2.0499849e+01   5.0000000e+01   7.0447651e+00  -4.6225294e+01   1.1374185e+01
   2.1185328e+01  -2.0531297e+01   5.0000000e+01   7.9593819e+00  -4.7618308e+01   2.1222210e+01
   2.1053132e+01  -2.0566086e+01   5.0000000e+01   9.0087533e+00  -4.6080485e+01   3.1054892e+01
   2.0921953e+01  -2.0604193e+01   5.0000000e+01   1.0209998e+01  -4.1836178e+01   3.9367128e+01
   2.0791883e+01  -2.0645591e+01   5.0000000e+01   1.1652154e+01  -3.5939749e+01   4.5213983e+01
   2.0663013e+01  -2.0690249e+01   5.0000000e+01   1.3325055e+01  -2.9500919e+01   4.8358767e+01
   2.0535436e+01  -2.0738137e+01   5.0000000e+01   1.4942879e+01  -2.3354845e+01   4.8962956e+01
   2.0409243e+01  -2.0789220e+01   5.0000000e+01   1.6088036e+01  -1.8019428e+01   4.7486272e+01
   2.0284523e+01  -2.0843462e+01   5.0000000e+01   1.6495104e+01  -1.3739793e+01   4.4496752e+01
   2.0161365e+01  -2.0900825e+01   5.0000000e+01   1.6066715e+01  -1.0743142e+01   4.0666491e+01
   2.0039859e+01  -2.0961268e+01   5.0000000e+01   1.4849222e+01  -9.0129491e+00   3.6999227e+01
   1.9920092e+01  -2.1024748e+01   5.0000000e+01   1.3190580e+01  -7.8901706e+00   3.4307236e+01
   1.9802151e+01  -2.1091220e+01   5.0000000e+01   1.1611028e+01  -6.6241889e+00   3.2473635e+01
   1.9686120e+01  -2.1160637e+01   5.0000000e+01   1.0385895e+01  -5.0668993e+00   3.0894407e+01
   1.9572085e+01  -2.1232948e+01   5.0000000e+01   9.5702156e+00  -3.3865455e+00   2.9259109e+01
   1.9460129e+01  -2.1308104e+01   5.0000000e+01   9.3173253e+00  -1.6896039e+00   2.7390870e+01
   1.9350335e+01  -2.1386049e+01   5.0000000e+01   9.7653159e+00  -1.4311250e-01   2.4934264e+01
   1.9242784e+01  -2.1466728e+01   5.0000000e+01   1.0737908e+01   1.0386300e+00   2.1516208e+01
   1.9137555e+01  -2.1550084e+01   5.0000000e+01   1.1673142e+01   1.5983019e+00   1.6968433e+01
   1.9034727e+01  -2.1636057e+01   5.0000000e+01   1.1798630e+01   1.1870248e+00   1.1793285e+01
   1.8934378e+01  -2.1724585e+01   5.0000000e+01   1.0780058e+01  -1.4039475e-01   7.3004878e+00
   1.8836583e+01  -2.1815605e+01   5.0000000e+01   9.1754117e+00  -1.7556183e+00   4.5025031e+00
   1.8741417e+01  -2.1909051e+01   5.0000000e+01   7.8094349e+00  -3.1758497e+00   3.3660101e+00
   1.8648953e+01  -2.2004856e+01   5.0000000e+01   7.0504289e+00  -4.2191543e+00   3.4275047e+00
   1.8559262e+01  -2.2102951e+01   5.0000000e+01   6.7744695e+00  -4.6387371e+00   4.1232744e+00
   1.8472415e+01  -2.2203264e+01   5.0000000e+01   6.4659162e+00  -4.4771323e+00   4.8494919e+00
   1.8388478e+01  -2.2305724e+01   5.0000000e+01   5.6468374e+00  -4.2238909e+00   5.6152672e+00
   1.8307520e+01  -2.2410257e+01   5.0000000e+01   4.5215235e+00  -4.1135680e+00   6.9650368e+00
   1.8229604e+01  -2.2516785e+01   5.0000000e+01   3.7530157e+00  -3.8801223e+00   8.9881359e+00
   1.8154795e+01  -2.2625233e+01   5.0000000e+01   3.6476147e+00  -3.3146729e+00   1.1128169e+01
   1.8083152e+01  -2.2735520e+01   5.0000000e+01   3.9615893e+00  -2.5915975e+00   1.2996679e+01
   1.8014736e+01  -2.2847567e+01   5.0000000e+01   4.5472040e+00  -1.8920392e+00   1.4830019e+01
   1.7949604e+01  -2.2961291e+01   5.0000000e+01   5.7740725e+00  -9.7034319e-01   1.6769960e+01
   1.7887810e+01  -2.3076610e+01   5.0000000e+01   7.8634604e+00   5.5938338e-01   1.8155045e+01
   1.7829410e+01  -2.3193438e+01   5.0000000e+01   1.0315736e+01   2.7086429e+00   1.8123243e+01
   1.7774454e+01  -2.3311689e+01   5.0000000e+01   1.2326840e+01   5.1409003e+00   1.6348311e+01
   1.7722991e+01  -2.3431277e+01   5.0000000e+01   1.3153712e+01   7.3250817e+00   1.3160958e+01
   1.7675069e+01  -2.3552112e+01   5.0000000e+01   1.2503521e+01   8.6675436e+00   9.6375000e+00
   1.7630732e+01  -2.3674106e+01   5.0000000e+01   1.0969159e+01   8.9756049e+00   6.8509323e+00
   1.7590022e+01  -2.3797168e+01   5.0000000e+01   9.1125976e+00   8.6033603e+00   4.9224459e+00
   1.7552981e+01  -2.3921205e+01   5.0000000e+01   6.6090661e+00   7.9153220e+00   3.8954872e+00
   1.7519646e+01  -2.4046126e+01   5.0000000e+01   3.3837725e+00   7.0575872e+00   4.6635387e+00
   1.7490053e+01  -2.4171837e+01   5.0000000e+01   5.2510559e-01   6.3188220e+00   7.8941754e+00
   1.7464233e+01  -2.4298243e+01   5.0000000e+01  -6.1077931e-01   6.1777527e+00   1.2961553e+01
   1.7442219e+01  -2.4425250e+01   5.0000000e+01   6.1261606e-01   6.9537431e+00   1.8376807e+01
   1.7424038e+01  -2.4552761e+01   5.0000000e+01   3.9665229e+00   8.6808335e+00   2.2588129e+01
   1.7409714e+01  -2.4680680e+01   5.0000000e+01   8.4771875e+00   1.1140340e+01   2.4445642e+01
   1.7399272e+01  -2.4808910e+01   5.0000000e+01   1.2723397e+01   1.3905408e+01   2.3662231e+01
   1.7392729e+01  -2.4937353e+01   5.0000000e+01   1.5668670e+01   1.6529088e+01   2.1003377e+01
   1.7390105e+01  -2.5065911e+01   5.0000000e+01   1.7293579e+01   1.8593105e+01   1.7484941e+01
   1.7391413e+01  -2.5194486e+01   5.0000000e+01   1.7985012e+01   1.9603451e+01   1.3541001e+01
   1.7396664e+01  -2.5322979e+01   5.0000000e+01   1.7813691e+01   1.9191806e+01   9.4026076e+00
   1.7405867e+01  -2.5451290e+01   5.0000000e+01   1.6807945e+01   1.7470901e+01   5.5386178e+00
   1.7419027e+01  -2.5579320e+01   5.0000000e+01   1.5256601e+01   1.5013117e+01   2.3483242e+00
   1.7436148e+01  -2.5706971e+01   5.0000000e+01   1.3592399e+01   1.2405734e+01  -2.4053572e-01
   1.7457228e+01  -2.5834142e+01   5.0000000e+01   1.1823663e+01   9.9448423e+00  -2.8907777e+00
   1.7482265e+01  -2.5960734e+01   5.0000000e+01   9.0116425e+00   7.7850375e+00  -5.8541866e+00
   1.7511251e+01  -2.6086648e+01   5.0000000e+01   4.4470808e+00   5.9130130e+00  -7.9341886e+00
   1.7544176e+01  -2.6211786e+01   5.0000000e+01  -1.1374108e+00   3.9887495e+00  -7.8129784e+00
   1.7581028e+01  -2.6336047e+01   5.0000000e+01  -6.6761950e+00   1.8287061e+00  -5.3208931e+00
   1.7621791e+01  -2.6459334e+01   5.0000000e+01  -1.1478426e+01  -3.0056742e-01  -5.3307068e-01
   1.7666444e+01  -2.6581549e+01   5.0000000e+01  -1.4594931e+01  -2.1533704e+00   6.2634954e+00
   1.7714966e+01  -2.6702594e+01   5.0000000e+01  -1.5363373e+01  -3.4907951e+00   1.3910995e+01
   1.7767330e+01  -2.6822373e+01   5.0000000e+01  -1.3847757e+01  -3.6880342e+00   2.1318422e+01
[truncated: 3,642,157 more chars]
