# Supplementary material for: A high-resolution lithospheric magnetic field model over southern Africa based on a joint inversion of CHAMP, Swarm, WDMAM, and ground magnetic field data
Source: Copernicus journal article supplement (doi:10.5194/se-9-897-2018), 2018-07-16
Supplement: Supplementary file 1 [file se-9-897-2018-supplement.zip › SupplementaryMaterial/ModelSA100km.txt]

   2.2500005e+01  -2.4999991e+01   1.0000000e+02   1.0952084e+01  -1.2094282e+01  -2.3285525e+01
   2.2566483e+01  -2.5124977e+01   1.0000000e+02   8.8853406e+00  -1.1181403e+01  -2.5654701e+01
   2.2649272e+01  -2.5030796e+01   1.0000000e+02   9.5761742e+00  -1.1749463e+01  -2.6599130e+01
   2.2619593e+01  -2.4913455e+01   1.0000000e+02   1.1491787e+01  -1.2614989e+01  -2.4675212e+01
   2.2500000e+01  -2.4861269e+01   1.0000000e+02   1.2707542e+01  -1.2779307e+01  -2.1772424e+01
   2.2380407e+01  -2.4913455e+01   1.0000000e+02   1.2539228e+01  -1.2158526e+01  -2.0468826e+01
   2.2350728e+01  -2.5030796e+01   1.0000000e+02   1.1421552e+01  -1.1437026e+01  -2.1147855e+01
   2.2433517e+01  -2.5124977e+01   1.0000000e+02   9.8978119e+00  -1.1077876e+01  -2.3190080e+01
   2.2791110e+01  -2.5050403e+01   1.0000000e+02   8.0871510e+00  -1.0558641e+01  -2.9943716e+01
   2.2783469e+01  -2.4922052e+01   1.0000000e+02   1.0347137e+01  -1.1807262e+01  -2.8327636e+01
   2.2711005e+01  -2.4811602e+01   1.0000000e+02   1.2517673e+01  -1.2938130e+01  -2.5158398e+01
   2.2590406e+01  -2.4744279e+01   1.0000000e+02   1.3863505e+01  -1.3336141e+01  -2.1778724e+01
   2.2449214e+01  -2.4735429e+01   1.0000000e+02   1.4315560e+01  -1.2998975e+01  -1.9382526e+01
   2.2319588e+01  -2.4787069e+01   1.0000000e+02   1.4068864e+01  -1.2293521e+01  -1.8359700e+01
   2.2231095e+01  -2.4887431e+01   1.0000000e+02   1.3340740e+01  -1.1543182e+01  -1.8453799e+01
   2.2204049e+01  -2.5013608e+01   1.0000000e+02   1.2350878e+01  -1.0842266e+01  -1.9312446e+01
   2.2244821e+01  -2.5136726e+01   1.0000000e+02   1.1125410e+01  -1.0230347e+01  -2.0754589e+01
   2.2344231e+01  -2.5228534e+01   1.0000000e+02   9.6052137e+00  -9.8878854e+00  -2.2656116e+01
   2.2479512e+01  -2.5267912e+01   1.0000000e+02   8.0262581e+00  -9.8326863e+00  -2.4988211e+01
   2.2619515e+01  -2.5245788e+01   1.0000000e+02   6.8852802e+00  -9.8087228e+00  -2.7524756e+01
   2.2731985e+01  -2.5167260e+01   1.0000000e+02   6.7864060e+00  -9.8957844e+00  -2.9502250e+01
   2.2627648e+01  -2.4622121e+01   1.0000000e+02   1.5163161e+01  -1.3692531e+01  -2.0496562e+01
   2.2485785e+01  -2.4604968e+01   1.0000000e+02   1.5589416e+01  -1.3384851e+01  -1.8077588e+01
   2.2345448e+01  -2.4630489e+01   1.0000000e+02   1.5566681e+01  -1.2743934e+01  -1.6785117e+01
   2.2221716e+01  -2.4695945e+01   1.0000000e+02   1.5170531e+01  -1.2019836e+01  -1.6464700e+01
   2.2127926e+01  -2.4794296e+01   1.0000000e+02   1.4478757e+01  -1.1357642e+01  -1.6791937e+01
   2.2074261e+01  -2.4914949e+01   1.0000000e+02   1.3663552e+01  -1.0753559e+01  -1.7509499e+01
   2.2066638e+01  -2.5044874e+01   1.0000000e+02   1.2843304e+01  -1.0105568e+01  -1.8572298e+01
   2.2106024e+01  -2.5169999e+01   1.0000000e+02   1.1887341e+01  -9.3843412e+00  -1.9964596e+01
   2.2188274e+01  -2.5276731e+01   1.0000000e+02   1.0593623e+01  -8.7678126e+00  -2.1538976e+01
   2.2304526e+01  -2.5353443e+01   1.0000000e+02   8.9930259e+00  -8.4766333e+00  -2.3247323e+01
   2.2442139e+01  -2.5391760e+01   1.0000000e+02   7.3069707e+00  -8.4252898e+00  -2.5258457e+01
   2.2586081e+01  -2.5387492e+01   1.0000000e+02   5.7642983e+00  -8.2603512e+00  -2.7620097e+01
   2.2720608e+01  -2.5341106e+01   1.0000000e+02   4.6334960e+00  -7.8341760e+00  -3.0037294e+01
   2.2831035e+01  -2.5257672e+01   1.0000000e+02   4.3093409e+00  -7.4700579e+00  -3.2025257e+01
   2.2905370e+01  -2.5146297e+01   1.0000000e+02   5.1467259e+00  -7.7239665e+00  -3.3074482e+01
   2.2935626e+01  -2.5019107e+01   1.0000000e+02   7.1421196e+00  -8.8851285e+00  -3.2746751e+01
   2.2918657e+01  -2.4889911e+01   1.0000000e+02   9.7876258e+00  -1.0644698e+01  -3.0835511e+01
   2.2856438e+01  -2.4772694e+01   1.0000000e+02   1.2300263e+01  -1.2326163e+01  -2.7615862e+01
   2.2755800e+01  -2.4680108e+01   1.0000000e+02   1.4123312e+01  -1.3392268e+01  -2.3871544e+01
   2.2005477e+01  -2.4730152e+01   1.0000000e+02   1.5334576e+01  -1.1098292e+01  -1.5614128e+01
   2.1948449e+01  -2.4845263e+01   1.0000000e+02   1.4560344e+01  -1.0657758e+01  -1.6343643e+01
   2.1923356e+01  -2.4969413e+01   1.0000000e+02   1.3899710e+01  -1.0184117e+01  -1.7248276e+01
   2.1931748e+01  -2.5095402e+01   1.0000000e+02   1.3337760e+01  -9.5549759e+00  -1.8453612e+01
   2.1973238e+01  -2.5215904e+01   1.0000000e+02   1.2641019e+01  -8.7326616e+00  -1.9934294e+01
   2.2045499e+01  -2.5323890e+01   1.0000000e+02   1.1577659e+01  -7.8614853e+00  -2.1458758e+01
   2.2144380e+01  -2.5413044e+01   1.0000000e+02   1.0133421e+01  -7.2152370e+00  -2.2841562e+01
   2.2264136e+01  -2.5478137e+01   1.0000000e+02   8.4850864e+00  -6.9531111e+00  -2.4183215e+01
   2.2397759e+01  -2.5515346e+01   1.0000000e+02   6.8152980e+00  -6.9149437e+00  -2.5755783e+01
   2.2537398e+01  -2.5522483e+01   1.0000000e+02   5.2094209e+00  -6.7234572e+00  -2.7681630e+01
   2.2674836e+01  -2.5499126e+01   1.0000000e+02   3.7153925e+00  -6.1111097e+00  -2.9808385e+01
   2.2801990e+01  -2.5446650e+01   1.0000000e+02   2.4660353e+00  -5.1477280e+00  -3.1864666e+01
   2.2911403e+01  -2.5368141e+01   1.0000000e+02   1.7303416e+00  -4.2085127e+00  -3.3625534e+01
   2.2996693e+01  -2.5268206e+01   1.0000000e+02   1.8211418e+00  -3.7950356e+00  -3.4912912e+01
   2.3052932e+01  -2.5152698e+01   1.0000000e+02   2.9390124e+00  -4.3152392e+00  -3.5543267e+01
   2.3076921e+01  -2.5028363e+01   1.0000000e+02   5.0634069e+00  -5.8382500e+00  -3.5286328e+01
   2.3067361e+01  -2.4902443e+01   1.0000000e+02   7.8646705e+00  -8.0132632e+00  -3.3887897e+01
   2.3024906e+01  -2.4782247e+01   1.0000000e+02   1.0755998e+01  -1.0281445e+01  -3.1286933e+01
   2.2952106e+01  -2.4674736e+01   1.0000000e+02   1.3186004e+01  -1.2160444e+01  -2.7803233e+01
   2.2853234e+01  -2.4586117e+01   1.0000000e+02   1.4901948e+01  -1.3388215e+01  -2.4030332e+01
   2.2734035e+01  -2.4521494e+01   1.0000000e+02   1.5953217e+01  -1.3927038e+01  -2.0563439e+01
   2.2601387e+01  -2.4484584e+01   1.0000000e+02   1.6520131e+01  -1.3895593e+01  -1.7806080e+01
   2.2462919e+01  -2.4477508e+01   1.0000000e+02   1.6762935e+01  -1.3481805e+01  -1.5934429e+01
   2.2326579e+01  -2.4500672e+01   1.0000000e+02   1.6766371e+01  -1.2871845e+01  -1.4946364e+01
   2.2200199e+01  -2.4552745e+01   1.0000000e+02   1.6537412e+01  -1.2213204e+01  -1.4714597e+01
   2.2091059e+01  -2.4630734e+01   1.0000000e+02   1.6047719e+01  -1.1607008e+01  -1.5020405e+01
   2.1844868e+01  -2.5273528e+01   1.0000000e+02   1.3382625e+01  -8.4346036e+00  -2.0511203e+01
   2.1916247e+01  -2.5384116e+01   1.0000000e+02   1.2397468e+01  -7.2923616e+00  -2.2283414e+01
   2.2010268e+01  -2.5479941e+01   1.0000000e+02   1.0941788e+01  -6.2510789e+00  -2.3700283e+01
   2.2123330e+01  -2.5557281e+01   1.0000000e+02   9.2199088e+00  -5.6134677e+00  -2.4753224e+01
   2.2251066e+01  -2.5613127e+01   1.0000000e+02   7.4688137e+00  -5.4284394e+00  -2.5757222e+01
   2.2388512e+01  -2.5645302e+01   1.0000000e+02   5.8099957e+00  -5.4053443e+00  -2.7055366e+01
   2.2530311e+01  -2.5652548e+01   1.0000000e+02   4.2385927e+00  -5.1034228e+00  -2.8727879e+01
   2.2670926e+01  -2.5634584e+01   1.0000000e+02   2.7076350e+00  -4.2293580e+00  -3.0566291e+01
   2.2804870e+01  -2.5592111e+01   1.0000000e+02   1.2238647e+00  -2.8123410e+00  -3.2282676e+01
   2.2926927e+01  -2.5526786e+01   1.0000000e+02  -8.6039004e-02  -1.1682369e+00  -3.3720770e+01
   2.3032366e+01  -2.5441153e+01   1.0000000e+02  -9.7752695e-01   2.5012797e-01  -3.4875550e+01
   2.3117126e+01  -2.5338544e+01   1.0000000e+02  -1.1809517e+00   9.7018747e-01  -3.5784969e+01
   2.3177977e+01  -2.5222939e+01   1.0000000e+02  -4.8441489e-01   6.1258857e-01  -3.6463685e+01
   2.3212635e+01  -2.5098809e+01   1.0000000e+02   1.2460985e+00  -9.2218326e-01  -3.6813204e+01
   2.3219844e+01  -2.4970944e+01   1.0000000e+02   3.9521580e+00  -3.3585346e+00  -3.6508415e+01
   2.3199412e+01  -2.4844261e+01   1.0000000e+02   7.2355943e+00  -6.1926237e+00  -3.5146781e+01
   2.3152206e+01  -2.4723616e+01   1.0000000e+02   1.0479668e+01  -8.9283758e+00  -3.2594284e+01
   2.3080104e+01  -2.4613620e+01   1.0000000e+02   1.3171709e+01  -1.1212831e+01  -2.9120977e+01
   2.2985914e+01  -2.4518468e+01   1.0000000e+02   1.5104826e+01  -1.2860030e+01  -2.5244773e+01
   2.2873265e+01  -2.4441779e+01   1.0000000e+02   1.6350098e+01  -1.3829875e+01  -2.1494551e+01
   2.2746461e+01  -2.4386462e+01   1.0000000e+02   1.7101529e+01  -1.4192814e+01  -1.8259477e+01
   2.2610323e+01  -2.4354616e+01   1.0000000e+02   1.7537404e+01  -1.4088626e+01  -1.5757773e+01
   2.2470010e+01  -2.4347446e+01   1.0000000e+02   1.7771695e+01  -1.3685524e+01  -1.4065151e+01
   2.2330831e+01  -2.4365223e+01   1.0000000e+02   1.7862572e+01  -1.3135758e+01  -1.3150827e+01
   2.2198056e+01  -2.4407274e+01   1.0000000e+02   1.7812635e+01  -1.2542935e+01  -1.2914549e+01
   2.2076722e+01  -2.4472006e+01   1.0000000e+02   1.7562399e+01  -1.1968032e+01  -1.3210512e+01
   2.1971451e+01  -2.4556965e+01   1.0000000e+02   1.7037645e+01  -1.1455361e+01  -1.3847476e+01
   2.1886278e+01  -2.4658924e+01   1.0000000e+02   1.6255154e+01  -1.1036329e+01  -1.4613855e+01
   2.1824496e+01  -2.4774000e+01   1.0000000e+02   1.5385875e+01  -1.0707791e+01  -1.5374357e+01
   2.1788530e+01  -2.4897801e+01   1.0000000e+02   1.4672165e+01  -1.0408327e+01  -1.6177759e+01
   2.1779836e+01  -2.5025590e+01   1.0000000e+02   1.4228643e+01  -1.0014089e+01  -1.7234274e+01
   2.1798831e+01  -2.5152461e+01   1.0000000e+02   1.3907202e+01  -9.3794715e+00  -1.8710991e+01
   2.2206112e+01  -2.5734817e+01   1.0000000e+02   6.5022011e+00  -4.0698716e+00  -2.7285755e+01
   2.2344390e+01  -2.5768576e+01   1.0000000e+02   4.8831633e+00  -4.0674787e+00  -2.8233495e+01
   2.2486994e+01  -2.5781239e+01   1.0000000e+02   3.4093271e+00  -3.7805095e+00  -2.9615329e+01
   2.2629959e+01  -2.5772455e+01   1.0000000e+02   1.9941405e+00  -2.8474786e+00  -3.1198141e+01
   2.2769312e+01  -2.5742469e+01   1.0000000e+02   5.7139847e-01  -1.1995672e+00  -3.2614506e+01
   2.2901183e+01  -2.5692114e+01   1.0000000e+02  -8.6835344e-01   9.3298581e-01  -3.3612666e+01
   2.3021922e+01  -2.5622788e+01   1.0000000e+02  -2.2420728e+00   3.1506142e+00  -3.4189852e+01
   2.3128207e+01  -2.5536414e+01   1.0000000e+02  -3.3689527e+00   5.0282090e+00  -3.4522178e+01
   2.3217130e+01  -2.5435380e+01   1.0000000e+02  -4.0374476e+00   6.1623715e+00  -3.4818476e+01
   2.3286284e+01  -2.5322476e+01   1.0000000e+02  -4.0536686e+00   6.1991380e+00  -3.5271298e+01
   2.3333824e+01  -2.5200810e+01   1.0000000e+02  -3.1879825e+00   4.9724571e+00  -3.5989801e+01
   2.3358512e+01  -2.5073722e+01   1.0000000e+02  -1.2105937e+00   2.6378973e+00  -3.6781732e+01
   2.3359744e+01  -2.4944688e+01   1.0000000e+02   1.8528194e+00  -3.9307921e-01  -3.7089179e+01
   2.3337560e+01  -2.4817228e+01   1.0000000e+02   5.5593576e+00  -3.6512971e+00  -3.6321914e+01
   2.3292633e+01  -2.4694808e+01   1.0000000e+02   9.2452739e+00  -6.7557380e+00  -3.4251561e+01
   2.3226246e+01  -2.4580748e+01   1.0000000e+02   1.2366819e+01  -9.4514820e+00  -3.1089256e+01
   2.3140249e+01  -2.4478131e+01   1.0000000e+02   1.4685689e+01  -1.1591040e+01  -2.7300769e+01
   2.3037005e+01  -2.4389725e+01   1.0000000e+02   1.6247169e+01  -1.3112422e+01  -2.3383825e+01
   2.2919326e+01  -2.4317909e+01   1.0000000e+02   1.7246334e+01  -1.4025387e+01  -1.9732255e+01
   2.2790392e+01  -2.4264612e+01   1.0000000e+02   1.7888437e+01  -1.4397590e+01  -1.6604635e+01
   2.2653675e+01  -2.4231265e+01   1.0000000e+02   1.8313614e+01  -1.4343845e+01  -1.4150922e+01
   2.2512842e+01  -2.4218760e+01   1.0000000e+02   1.8597828e+01  -1.4014432e+01  -1.2433555e+01
   2.2371665e+01  -2.4227433e+01   1.0000000e+02   1.8786654e+01  -1.3559404e+01  -1.1429146e+01
   2.2233924e+01  -2.4257052e+01   1.0000000e+02   1.8905317e+01  -1.3075937e+01  -1.1048186e+01
   2.2103315e+01  -2.4306822e+01   1.0000000e+02   1.8930159e+01  -1.2590692e+01  -1.1181889e+01
   2.1983349e+01  -2.4375409e+01   1.0000000e+02   1.8768472e+01  -1.2100336e+01  -1.1724389e+01
   2.1877268e+01  -2.4460971e+01   1.0000000e+02   1.8304435e+01  -1.1622029e+01  -1.2544320e+01
   2.1787954e+01  -2.4561206e+01   1.0000000e+02   1.7501242e+01  -1.1201121e+01  -1.3463621e+01
   2.1717858e+01  -2.4673412e+01   1.0000000e+02   1.6482124e+01  -1.0882522e+01  -1.4311404e+01
   2.1668928e+01  -2.4794557e+01   1.0000000e+02   1.5512475e+01  -1.0675523e+01  -1.5041002e+01
   2.1642551e+01  -2.4921357e+01   1.0000000e+02   1.4857512e+01  -1.0525011e+01  -1.5812453e+01
   2.1639516e+01  -2.5050367e+01   1.0000000e+02   1.4590184e+01  -1.0300466e+01  -1.6925465e+01
   2.1659977e+01  -2.5178069e+01   1.0000000e+02   1.4503870e+01  -9.8235865e+00  -1.8598673e+01
   2.1703447e+01  -2.5300971e+01   1.0000000e+02   1.4221052e+01  -8.9490746e+00  -2.0753535e+01
   2.1768802e+01  -2.5415702e+01   1.0000000e+02   1.3423763e+01  -7.6786254e+00  -2.2994110e+01
   2.1854304e+01  -2.5519106e+01   1.0000000e+02   1.2034882e+01  -6.2341730e+00  -2.4831461e+01
   2.1957642e+01  -2.5608328e+01   1.0000000e+02   1.0232767e+01  -4.9934431e+00  -2.6007920e+01
   2.2075997e+01  -2.5680903e+01   1.0000000e+02   8.3114297e+00  -4.2682642e+00  -2.6677959e+01
   2.2817160e+01  -2.5862456e+01   1.0000000e+02  -1.1479173e+00   1.4587488e+00  -3.3870574e+01
   2.2950195e+01  -2.5812714e+01   1.0000000e+02  -2.3906457e+00   4.1081751e+00  -3.4152226e+01
   2.3073880e+01  -2.5746332e+01   1.0000000e+02  -3.6683495e+00   6.7954356e+00  -3.3815510e+01
   2.3185665e+01  -2.5664687e+01   1.0000000e+02  -4.9100125e+00   9.1360640e+00  -3.3141169e+01
   2.3283263e+01  -2.5569471e+01   1.0000000e+02  -5.9872783e+00   1.0814130e+01  -3.2472044e+01
   2.3364693e+01  -2.5462651e+01   1.0000000e+02  -6.7699510e+00   1.1536624e+01  -3.2133487e+01
   2.3428322e+01  -2.5346430e+01   1.0000000e+02  -7.0796526e+00   1.1070036e+01  -3.2446154e+01
   2.3472896e+01  -2.5223196e+01   1.0000000e+02  -6.5769590e+00   9.3875771e+00  -3.3579319e+01
   2.3497562e+01  -2.5095476e+01   1.0000000e+02  -4.8617426e+00   6.7315976e+00  -3.5254758e+01
   2.3501877e+01  -2.4965878e+01   1.0000000e+02  -1.8226655e+00   3.4941848e+00  -3.6723278e+01
   2.3485818e+01  -2.4837042e+01   1.0000000e+02   2.1537726e+00   5.5383834e-02  -3.7173484e+01
   2.3449774e+01  -2.4711583e+01   1.0000000e+02   6.3650148e+00  -3.2960355e+00  -3.6179304e+01
   2.3394533e+01  -2.4592042e+01   1.0000000e+02   1.0154684e+01  -6.3658187e+00  -3.3814492e+01
   2.3321262e+01  -2.4480829e+01   1.0000000e+02   1.3148828e+01  -9.0275179e+00  -3.0477324e+01
   2.3231482e+01  -2.4380185e+01   1.0000000e+02   1.5283740e+01  -1.1199198e+01  -2.6655129e+01
   2.3127031e+01  -2.4292130e+01   1.0000000e+02   1.6706209e+01  -1.2837280e+01  -2.2766975e+01
   2.3010031e+01  -2.4218429e+01   1.0000000e+02   1.7641075e+01  -1.3935637e+01  -1.9109871e+01
   2.2882839e+01  -2.4160555e+01   1.0000000e+02   1.8287208e+01  -1.4521984e+01  -1.5878276e+01
   2.2748007e+01  -2.4119665e+01   1.0000000e+02   1.8768060e+01  -1.4661812e+01  -1.3208841e+01
   2.2608231e+01  -2.4096575e+01   1.0000000e+02   1.9139101e+01  -1.4471913e+01  -1.1198642e+01
   2.2466298e+01  -2.4091744e+01   1.0000000e+02   1.9427984e+01  -1.4111691e+01  -9.8792370e+00
   2.2325037e+01  -2.4105269e+01   1.0000000e+02   1.9666606e+01  -1.3726744e+01  -9.1905179e+00
   2.2187263e+01  -2.4136881e+01   1.0000000e+02   1.9884431e+01  -1.3379307e+01  -9.0111505e+00
   2.2055726e+01  -2.4185949e+01   1.0000000e+02   2.0066394e+01  -1.3035852e+01  -9.2339296e+00
   2.1933060e+01  -2.4251493e+01   1.0000000e+02   2.0118969e+01  -1.2632595e+01  -9.8056122e+00
   2.1821731e+01  -2.4332204e+01   1.0000000e+02   1.9894581e+01  -1.2153908e+01  -1.0682552e+01
   2.1723990e+01  -2.4426466e+01   1.0000000e+02   1.9274175e+01  -1.1650563e+01  -1.1757550e+01
   2.1641829e+01  -2.4532388e+01   1.0000000e+02   1.8257039e+01  -1.1204823e+01  -1.2847548e+01
   2.1576941e+01  -2.4647842e+01   1.0000000e+02   1.7009077e+01  -1.0890457e+01  -1.3768337e+01
   2.1530681e+01  -2.4770499e+01   1.0000000e+02   1.5833050e+01  -1.0743467e+01  -1.4460868e+01
   2.1504041e+01  -2.4897882e+01   1.0000000e+02   1.5037655e+01  -1.0737898e+01  -1.5087521e+01
   2.1497622e+01  -2.5027408e+01   1.0000000e+02   1.4755204e+01  -1.0769740e+01  -1.5995618e+01
   2.1511616e+01  -2.5156444e+01   1.0000000e+02   1.4833942e+01  -1.0660841e+01  -1.7525627e+01
   2.1545804e+01  -2.5282358e+01   1.0000000e+02   1.4896607e+01  -1.0199639e+01  -1.9775848e+01
   2.1599547e+01  -2.5402574e+01   1.0000000e+02   1.4532156e+01  -9.2284457e+00  -2.2485742e+01
   2.1671799e+01  -2.5514624e+01   1.0000000e+02   1.3497173e+01  -7.7541688e+00  -2.5123904e+01
   2.1761122e+01  -2.5616202e+01   1.0000000e+02   1.1815517e+01  -6.0153704e+00  -2.7141880e+01
   2.1865716e+01  -2.5705211e+01   1.0000000e+02   9.7391238e+00  -4.4248443e+00  -2.8265524e+01
   2.1983447e+01  -2.5779810e+01   1.0000000e+02   7.6029529e+00  -3.3660313e+00  -2.8655611e+01
   2.2111897e+01  -2.5838451e+01   1.0000000e+02   5.6598679e+00  -2.9521356e+00  -2.8807989e+01
   2.2248414e+01  -2.5879917e+01   1.0000000e+02   3.9974446e+00  -2.9347221e+00  -2.9241639e+01
   2.2390166e+01  -2.5903346e+01   1.0000000e+02   2.5702388e+00  -2.8346090e+00  -3.0200679e+01
   2.2534204e+01  -2.5908248e+01   1.0000000e+02   1.2854449e+00  -2.1859421e+00  -3.1557029e+01
   2.2677529e+01  -2.5894523e+01   1.0000000e+02   6.4186782e-02  -7.3903342e-01  -3.2922799e+01
   2.3395327e+01  -2.5648315e+01   1.0000000e+02  -7.6014404e+00   1.5342744e+01  -2.8798482e+01
   2.3476438e+01  -2.5543687e+01   1.0000000e+02  -8.6595315e+00   1.5936386e+01  -2.7709812e+01
   2.3542550e+01  -2.5430832e+01   1.0000000e+02  -9.5913039e+00   1.5501030e+01  -2.7564244e+01
   2.3592694e+01  -2.5311479e+01   1.0000000e+02  -1.0051775e+01   1.4021989e+01  -2.8679200e+01
   2.3626151e+01  -2.5187454e+01   1.0000000e+02  -9.4941874e+00   1.1677798e+01  -3.0970437e+01
   2.3642464e+01  -2.5060648e+01   1.0000000e+02  -7.4848006e+00   8.7580049e+00  -3.3785245e+01
   2.3641438e+01  -2.4932989e+01   1.0000000e+02  -4.0458423e+00   5.5406151e+00  -3.6153963e+01
   2.3623142e+01  -2.4806410e+01   1.0000000e+02   3.0653515e-01   2.2394930e+00  -3.7267902e+01
   2.3587905e+01  -2.4682823e+01   1.0000000e+02   4.8328790e+00  -9.8991819e-01  -3.6795183e+01
   2.3536306e+01  -2.4564089e+01   1.0000000e+02   8.8984864e+00  -4.0347524e+00  -3.4876250e+01
   2.3469165e+01  -2.4451993e+01   1.0000000e+02   1.2152622e+01  -6.8089437e+00  -3.1918581e+01
   2.3387527e+01  -2.4348212e+01   1.0000000e+02   1.4530881e+01  -9.2414139e+00  -2.8378935e+01
   2.3292645e+01  -2.4254297e+01   1.0000000e+02   1.6159711e+01  -1.1275851e+01  -2.4633946e+01
   2.3185961e+01  -2.4171648e+01   1.0000000e+02   1.7246948e+01  -1.2876006e+01  -2.0943663e+01
   2.3069082e+01  -2.4101496e+01   1.0000000e+02   1.7999369e+01  -1.4024168e+01  -1.7472525e+01
   2.2943759e+01  -2.4044881e+01   1.0000000e+02   1.8572341e+01  -1.4716907e+01  -1.4335048e+01
   2.2811860e+01  -2.4002644e+01   1.0000000e+02   1.9050911e+01  -1.4976617e+01  -1.1640776e+01
   2.2675344e+01  -2.3975411e+01   1.0000000e+02   1.9463805e+01  -1.4880641e+01  -9.5049216e+00
   2.2536233e+01  -2.3963584e+01   1.0000000e+02   1.9818069e+01  -1.4574685e+01  -8.0080192e+00
   2.2396586e+01  -2.3967339e+01   1.0000000e+02   2.0130900e+01  -1.4233807e+01  -7.1383752e+00
   2.2258470e+01  -2.3986621e+01   1.0000000e+02   2.0438534e+01  -1.3979534e+01  -6.7809931e+00
   2.2123927e+01  -2.4021143e+01   1.0000000e+02   2.0773737e+01  -1.3813837e+01  -6.7834309e+00
   2.1994955e+01  -2.4070395e+01   1.0000000e+02   2.1122576e+01  -1.3633575e+01  -7.0538594e+00
   2.1873472e+01  -2.4133646e+01   1.0000000e+02   2.1393909e+01  -1.3324129e+01  -7.5995735e+00
   2.1761292e+01  -2.4209958e+01   1.0000000e+02   2.1435670e+01  -1.2850165e+01  -8.4638749e+00
   2.1660100e+01  -2.4298196e+01   1.0000000e+02   2.1095671e+01  -1.2267929e+01  -9.6258987e+00
   2.1571427e+01  -2.4397046e+01   1.0000000e+02   2.0289896e+01  -1.1677238e+01  -1.0955057e+01
   2.1496626e+01  -2.4505033e+01   1.0000000e+02   1.9053204e+01  -1.1176903e+01  -1.2239939e+01
   2.1436852e+01  -2.4620542e+01   1.0000000e+02   1.7567284e+01  -1.0843850e+01  -1.3270369e+01
   2.1393044e+01  -2.4741841e+01   1.0000000e+02   1.6140075e+01  -1.0720504e+01  -1.3954217e+01
   2.1365907e+01  -2.4867105e+01   1.0000000e+02   1.5102406e+01  -1.0802601e+01  -1.4416813e+01
   2.1355902e+01  -2.4994445e+01   1.0000000e+02   1.4649559e+01  -1.1028035e+01  -1.4997117e+01
   2.1363232e+01  -2.5121935e+01   1.0000000e+02   1.4724484e+01  -1.1267678e+01  -1.6107048e+01
   2.1387842e+01  -2.5247641e+01   1.0000000e+02   1.5024295e+01  -1.1328238e+01  -1.8022241e+01
   2.1429408e+01  -2.5369649e+01   1.0000000e+02   1.5127400e+01  -1.0987399e+01  -2.0721634e+01
   2.1487346e+01  -2.5486095e+01   1.0000000e+02   1.4666651e+01  -1.0071595e+01  -2.3858593e+01
   2.1560817e+01  -2.5595198e+01   1.0000000e+02   1.3464452e+01  -8.5549960e+00  -2.6872527e+01
   2.1648732e+01  -2.5695281e+01   1.0000000e+02   1.1583885e+01  -6.6276536e+00  -2.9196171e+01
   2.1749773e+01  -2.5784802e+01   1.0000000e+02   9.2880645e+00  -4.6734741e+00  -3.0490086e+01
   2.1862409e+01  -2.5862380e+01   1.0000000e+02   6.9236490e+00  -3.1267009e+00  -3.0807771e+01
   2.1984918e+01  -2.5926814e+01   1.0000000e+02   4.7750678e+00  -2.2540468e+00  -3.0580026e+01
   2.2115417e+01  -2.5977106e+01   1.0000000e+02   2.9689312e+00  -2.0004947e+00  -3.0391362e+01
   2.2251889e+01  -2.6012474e+01   1.0000000e+02   1.4823307e+00  -2.0119114e+00  -3.0683817e+01
   2.2392219e+01  -2.6032368e+01   1.0000000e+02   2.2308052e-01  -1.8059963e+00  -3.1571320e+01
   2.2534225e+01  -2.6036480e+01   1.0000000e+02  -8.9183134e-01  -9.7512438e-01  -3.2834628e+01
   2.2675699e+01  -2.6024745e+01   1.0000000e+02  -1.9033491e+00   6.7436935e-01  -3.4050968e+01
   2.2814440e+01  -2.5997346e+01   1.0000000e+02  -2.8264388e+00   3.0817393e+00  -3.4773136e+01
   2.2948295e+01  -2.5954709e+01   1.0000000e+02  -3.6922646e+00   5.9741099e+00  -3.4694289e+01
   2.3075191e+01  -2.5897496e+01   1.0000000e+02  -4.5673914e+00   8.9649718e+00  -3.3765113e+01
   2.3193172e+01  -2.5826595e+01   1.0000000e+02  -5.5140392e+00   1.1684160e+01  -3.2212752e+01
   2.3300428e+01  -2.5743104e+01   1.0000000e+02  -6.5379914e+00   1.3869007e+01  -3.0425033e+01
   2.3766996e+01  -2.5206421e+01   1.0000000e+02  -1.2669452e+01   1.3928432e+01  -2.7038261e+01
   2.3783719e+01  -2.5078890e+01   1.0000000e+02  -1.0967819e+01   1.1300826e+01  -3.0975823e+01
   2.3784834e+01  -2.4950467e+01   1.0000000e+02  -7.6109541e+00   8.4430907e+00  -3.4518996e+01
   2.3770378e+01  -2.4822711e+01   1.0000000e+02  -3.1007482e+00   5.4475092e+00  -3.6757660e+01
   2.3740574e+01  -2.4697168e+01   1.0000000e+02   1.7883571e+00   2.3994935e+00  -3.7269283e+01
   2.3695825e+01  -2.4575353e+01   1.0000000e+02   6.3408784e+00  -6.1347316e-01  -3.6138485e+01
   2.3636712e+01  -2.4458730e+01   1.0000000e+02   1.0114350e+01  -3.5083511e+00  -3.3764304e+01
   2.3563983e+01  -2.4348698e+01   1.0000000e+02   1.2971941e+01  -6.2076262e+00  -3.0622576e+01
   2.3478542e+01  -2.4246574e+01   1.0000000e+02   1.4992992e+01  -8.6405871e+00  -2.7110319e+01
   2.3381437e+01  -2.4153577e+01   1.0000000e+02   1.6359101e+01  -1.0750806e+01  -2.3498198e+01
   2.3273847e+01  -2.4070813e+01   1.0000000e+02   1.7275020e+01  -1.2500207e+01  -1.9948400e+01
   2.3157070e+01  -2.3999268e+01   1.0000000e+02   1.7925527e+01  -1.3860282e+01  -1.6552372e+01
   2.3032504e+01  -2.3939789e+01   1.0000000e+02   1.8447450e+01  -1.4800353e+01  -1.3375524e+01
   2.2901635e+01  -2.3893081e+01   1.0000000e+02   1.8915564e+01  -1.5297128e+01  -1.0505509e+01
   2.2766016e+01  -2.3859698e+01   1.0000000e+02   1.9352448e+01  -1.5373694e+01  -8.0738543e+00
   2.2627254e+01  -2.3840034e+01   1.0000000e+02   1.9756473e+01  -1.5138824e+01  -6.2216410e+00
   2.2486990e+01  -2.3834322e+01   1.0000000e+02   2.0130837e+01  -1.4781337e+01  -5.0225272e+00
   2.2346878e+01  -2.3842629e+01   1.0000000e+02   2.0500333e+01  -1.4499610e+01  -4.4206594e+00
   2.2208576e+01  -2.3864856e+01   1.0000000e+02   2.0908259e+01  -1.4398453e+01  -4.2440588e+00
   2.2073717e+01  -2.3900742e+01   1.0000000e+02   2.1390762e+01  -1.4425627e+01  -4.3043363e+00
   2.1943900e+01  -2.3949862e+01   1.0000000e+02   2.1936938e+01  -1.4409818e+01  -4.5190602e+00
   2.1820668e+01  -2.4011634e+01   1.0000000e+02   2.2460011e+01  -1.4185641e+01  -4.9523490e+00
   2.1705490e+01  -2.4085325e+01   1.0000000e+02   2.2807709e+01  -1.3702962e+01  -5.7306501e+00
   2.1599747e+01  -2.4170063e+01   1.0000000e+02   2.2811462e+01  -1.3032760e+01  -6.9149461e+00
   2.1504717e+01  -2.4264838e+01   1.0000000e+02   2.2341184e+01  -1.2297624e+01  -8.4366902e+00
   2.1421556e+01  -2.4368522e+01   1.0000000e+02   2.1341952e+01  -1.1612617e+01  -1.0111007e+01
   2.1351286e+01  -2.4479876e+01   1.0000000e+02   1.9865464e+01  -1.1067459e+01  -1.1682798e+01
   2.1294783e+01  -2.4597569e+01   1.0000000e+02   1.8102351e+01  -1.0724462e+01  -1.2901275e+01
   2.1252763e+01  -2.4720187e+01   1.0000000e+02   1.6374450e+01  -1.0615616e+01  -1.3634530e+01
   2.1225776e+01  -2.4846255e+01   1.0000000e+02   1.5042312e+01  -1.0742095e+01  -1.3977383e+01
   2.1214194e+01  -2.4974252e+01   1.0000000e+02   1.4353140e+01  -1.1072463e+01  -1.4265075e+01
   2.1218203e+01  -2.5102628e+01   1.0000000e+02   1.4317774e+01  -1.1529142e+01  -1.4956741e+01
   2.1237805e+01  -2.5229823e+01   1.0000000e+02   1.4692830e+01  -1.1967807e+01  -1.6443263e+01
   2.1272810e+01  -2.5354289e+01   1.0000000e+02   1.5072922e+01  -1.2174589e+01  -1.8877382e+01
   2.1322835e+01  -2.5474505e+01   1.0000000e+02   1.5037087e+01  -1.1906911e+01  -2.2096981e+01
   2.1387313e+01  -2.5588997e+01   1.0000000e+02   1.4284409e+01  -1.0978804e+01  -2.5657910e+01
   2.1465492e+01  -2.5696358e+01   1.0000000e+02   1.2719836e+01  -9.3586613e+00  -2.8957722e+01
   2.1556443e+01  -2.5795263e+01   1.0000000e+02   1.0474382e+01  -7.2319957e+00  -3.1420490e+01
   2.1659074e+01  -2.5884489e+01   1.0000000e+02   7.8555801e+00  -4.9852425e+00  -3.2701400e+01
   2.1772138e+01  -2.5962932e+01   1.0000000e+02   5.2349992e+00  -3.0817233e+00  -3.2840817e+01
   2.1894251e+01  -2.6029616e+01   1.0000000e+02   2.9071407e+00  -1.8569091e+00  -3.2267307e+01
   2.2023907e+01  -2.6083711e+01   1.0000000e+02   9.9432806e-01  -1.3490243e+00  -3.1604404e+01
   2.2159501e+01  -2.6124543e+01   1.0000000e+02  -5.4322994e-01  -1.2821310e+00  -3.1385467e+01
   2.2299346e+01  -2.6151603e+01   1.0000000e+02  -1.8184643e+00  -1.1985990e+00  -3.1847801e+01
   2.2441699e+01  -2.6164552e+01   1.0000000e+02  -2.9268464e+00  -6.4565050e-01  -3.2884979e+01
   2.2584779e+01  -2.6163228e+01   1.0000000e+02  -3.9026440e+00   6.7008168e-01  -3.4132174e+01
   2.2726800e+01  -2.6147648e+01   1.0000000e+02  -4.7241690e+00   2.8083810e+00  -3.5120535e+01
   2.2865988e+01  -2.6118006e+01   1.0000000e+02  -5.3549890e+00   5.6094118e+00  -3.5428649e+01
   2.3000608e+01  -2.6074673e+01   1.0000000e+02  -5.8043652e+00   8.7594819e+00  -3.4791047e+01
   2.3128985e+01  -2.6018190e+01   1.0000000e+02  -6.1642078e+00   1.1875093e+01  -3.3173071e+01
   2.3249532e+01  -2.5949261e+01   1.0000000e+02  -6.5752269e+00   1.4608374e+01  -3.0798940e+01
   2.3360764e+01  -2.5868743e+01   1.0000000e+02  -7.1496222e+00   1.6742402e+01  -2.8072797e+01
   2.3461321e+01  -2.5777637e+01   1.0000000e+02  -7.9438174e+00   1.8191630e+01  -2.5425516e+01
   2.3549984e+01  -2.5677070e+01   1.0000000e+02  -8.9961144e+00   1.8906975e+01  -2.3247131e+01
   2.3625690e+01  -2.5568286e+01   1.0000000e+02  -1.0313520e+01   1.8816246e+01  -2.1958666e+01
   2.3687542e+01  -2.5452625e+01   1.0000000e+02  -1.1726158e+01   1.7881929e+01  -2.2036706e+01
   2.3734822e+01  -2.5331509e+01   1.0000000e+02  -1.2744624e+01   1.6188461e+01  -2.3794004e+01
   2.3875586e+01  -2.4659982e+01   1.0000000e+02   9.3720929e-01   4.5222260e+00  -3.6974028e+01
   2.3830879e+01  -2.4537575e+01   1.0000000e+02   5.5668111e+00   1.6495842e+00  -3.5960713e+01
   2.3773097e+01  -2.4419804e+01   1.0000000e+02   9.3651794e+00  -1.2205697e+00  -3.3755132e+01
   2.3702841e+01  -2.4307823e+01   1.0000000e+02   1.2243461e+01  -3.9938945e+00  -3.0833109e+01
   2.3620832e+01  -2.4202727e+01   1.0000000e+02   1.4301101e+01  -6.5865497e+00  -2.7560010e+01
   2.3527895e+01  -2.4105543e+01   1.0000000e+02   1.5709181e+01  -8.9340407e+00  -2.4167170e+01
   2.3424960e+01  -2.4017218e+01   1.0000000e+02   1.6647564e+01  -1.0996598e+01  -2.0785364e+01
   2.3313046e+01  -2.3938609e+01   1.0000000e+02   1.7285494e+01  -1.2749952e+01  -1.7478236e+01
   2.3193253e+01  -2.3870480e+01   1.0000000e+02   1.7766635e+01  -1.4162108e+01  -1.4270162e+01
   2.3066752e+01  -2.3813490e+01   1.0000000e+02   1.8188646e+01  -1.5179565e+01  -1.1189479e+01
   2.2934774e+01  -2.3768190e+01   1.0000000e+02   1.8596622e+01  -1.5748132e+01  -8.3185616e+00
   2.2798599e+01  -2.3735020e+01   1.0000000e+02   1.8999007e+01  -1.5864875e+01  -5.8098218e+00
   2.2659544e+01  -2.3714297e+01   1.0000000e+02   1.9392637e+01  -1.5626576e+01  -3.8415751e+00
   2.2518950e+01  -2.3706224e+01   1.0000000e+02   1.9782701e+01  -1.5232551e+01  -2.5307023e+00
   2.2378173e+01  -2.3710877e+01   1.0000000e+02   2.0192848e+01  -1.4919764e+01  -1.8529268e+00
   2.2238571e+01  -2.3728212e+01   1.0000000e+02   2.0664212e+01  -1.4850243e+01  -1.6320220e+00
   2.2101491e+01  -2.3758062e+01   1.0000000e+02   2.1240529e+01  -1.5015161e+01  -1.6262266e+00
   2.1968257e+01  -2.3800137e+01   1.0000000e+02   2.1939312e+01  -1.5231199e+01  -1.6746129e+00
   2.1840160e+01  -2.3854033e+01   1.0000000e+02   2.2719295e+01  -1.5254887e+01  -1.8009577e+00
   2.1718445e+01  -2.3919227e+01   1.0000000e+02   2.3467035e+01  -1.4938897e+01  -2.1811854e+00
   2.1604300e+01  -2.3995088e+01   1.0000000e+02   2.4020687e+01  -1.4302744e+01  -3.0003144e+00
   2.1498847e+01  -2.4080881e+01   1.0000000e+02   2.4218164e+01  -1.3478317e+01  -4.3275237e+00
   2.1403126e+01  -2.4175771e+01   1.0000000e+02   2.3934694e+01  -1.2613419e+01  -6.0905809e+00
   2.1318092e+01  -2.4278837e+01   1.0000000e+02   2.3096461e+01  -1.1821594e+01  -8.1110698e+00
   2.1244599e+01  -2.4389071e+01   1.0000000e+02   2.1698052e+01  -1.1181427e+01  -1.0135220e+01
   2.1183398e+01  -2.4505397e+01   1.0000000e+02   1.9844511e+01  -1.0742797e+01  -1.1869669e+01
   2.1135123e+01  -2.4626673e+01   1.0000000e+02   1.7785506e+01  -1.0526352e+01  -1.3066114e+01
   2.1100284e+01  -2.4751708e+01   1.0000000e+02   1.5881487e+01  -1.0531001e+01  -1.3643935e+01
   2.1079268e+01  -2.4879269e+01   1.0000000e+02   1.4487494e+01  -1.0750206e+01  -1.3772711e+01
   2.1072323e+01  -2.5008094e+01   1.0000000e+02   1.3809834e+01  -1.1175219e+01  -1.3845496e+01
   2.1079564e+01  -2.5136907e+01   1.0000000e+02   1.3817576e+01  -1.1770245e+01  -1.4345115e+01
   2.1100962e+01  -2.5264425e+01   1.0000000e+02   1.4252738e+01  -1.2432233e+01  -1.5671321e+01
   2.1136349e+01  -2.5389375e+01   1.0000000e+02   1.4720575e+01  -1.2968791e+01  -1.8004975e+01
   2.1185413e+01  -2.5510507e+01   1.0000000e+02   1.4808879e+01  -1.3123401e+01  -2.1245773e+01
   2.1247702e+01  -2.5626604e+01   1.0000000e+02   1.4197609e+01  -1.2650193e+01  -2.5023752e+01
   2.1322627e+01  -2.5736496e+01   1.0000000e+02   1.2740505e+01  -1.1410539e+01  -2.8778867e+01
   2.1409465e+01  -2.5839073e+01   1.0000000e+02   1.0502095e+01  -9.4528728e+00  -3.1899794e+01
   2.1507366e+01  -2.5933295e+01   1.0000000e+02   7.7386130e+00  -7.0434539e+00  -3.3897592e+01
   2.1615363e+01  -2.6018206e+01   1.0000000e+02   4.8219135e+00  -4.6176269e+00  -3.4576541e+01
   2.1732377e+01  -2.6092940e+01   1.0000000e+02   2.1149071e+00  -2.6339792e+00  -3.4133377e+01
   2.1857230e+01  -2.6156734e+01   1.0000000e+02  -1.5733721e-01  -1.3787328e+00  -3.3097589e+01
   2.1988659e+01  -2.6208937e+01   1.0000000e+02  -1.9623550e+00  -8.3797430e-01  -3.2109472e+01
   2.2125326e+01  -2.6249014e+01   1.0000000e+02  -3.4079695e+00  -7.1767889e-01  -3.1664546e+01
   2.2265835e+01  -2.6276554e+01   1.0000000e+02  -4.6356419e+00  -5.7673602e-01  -3.1960582e+01
   2.2408747e+01  -2.6291274e+01   1.0000000e+02  -5.7350272e+00   1.2143488e-02  -3.2878802e+01
   2.2552596e+01  -2.6293022e+01   1.0000000e+02  -6.7131513e+00   1.3293512e+00  -3.4063876e+01
   2.2695905e+01  -2.6281782e+01   1.0000000e+02  -7.5092074e+00   3.4375323e+00  -3.5062104e+01
   2.2837204e+01  -2.6257668e+01   1.0000000e+02  -8.0357068e+00   6.1950305e+00  -3.5462230e+01
   2.2975043e+01  -2.6220927e+01   1.0000000e+02  -8.2364223e+00   9.3275967e+00  -3.4979908e+01
   2.3108015e+01  -2.6171938e+01   1.0000000e+02  -8.1462423e+00   1.2498115e+01  -3.3489516e+01
   2.3234764e+01  -2.6111201e+01   1.0000000e+02  -7.9107138e+00   1.5363185e+01  -3.1057699e+01
   2.3354006e+01  -2.6039339e+01   1.0000000e+02  -7.7310560e+00   1.7656472e+01  -2.7960333e+01
   2.3464538e+01  -2.5957085e+01   1.0000000e+02  -7.7785539e+00   1.9265378e+01  -2.4601885e+01
   2.3565255e+01  -2.5865276e+01   1.0000000e+02  -8.1692221e+00   2.0209758e+01  -2.1376572e+01
   2.3655157e+01  -2.5764847e+01   1.0000000e+02  -9.0026535e+00   2.0536973e+01  -1.8627175e+01
   2.3733362e+01  -2.5656816e+01   1.0000000e+02  -1.0357036e+01   2.0258787e+01  -1.6739626e+01
   2.3799113e+01  -2.5542275e+01   1.0000000e+02  -1.2156605e+01   1.9392710e+01  -1.6207561e+01
   2.3851784e+01  -2.5422380e+01   1.0000000e+02  -1.3997503e+01   1.8029977e+01  -1.7477977e+01
   2.3890885e+01  -2.5298334e+01   1.0000000e+02  -1.5153846e+01   1.6321380e+01  -2.0616953e+01
   2.3916068e+01  -2.5171383e+01   1.0000000e+02  -1.4870516e+01   1.4386174e+01  -2.5086426e+01
   2.3927125e+01  -2.5042792e+01   1.0000000e+02  -1.2754032e+01   1.2252248e+01  -2.9873793e+01
   2.3923990e+01  -2.4913844e+01   1.0000000e+02  -8.9677969e+00   9.8920752e+00  -3.3887542e+01
   2.3906739e+01  -2.4785818e+01   1.0000000e+02  -4.1358604e+00   7.2989986e+00  -3.6346277e+01
   2.3728573e+01  -2.4121189e+01   1.0000000e+02   1.4065486e+01  -5.4156014e+00  -2.6346264e+01
   2.3635549e+01  -2.4023575e+01   1.0000000e+02   1.5300921e+01  -7.8434831e+00  -2.3217852e+01
   2.3533333e+01  -2.3934023e+01   1.0000000e+02   1.6117364e+01  -1.0026899e+01  -2.0099219e+01
   2.3422770e+01  -2.3853255e+01   1.0000000e+02   1.6654076e+01  -1.1959704e+01  -1.7026817e+01
   2.3304766e+01  -2.3781924e+01   1.0000000e+02   1.7040445e+01  -1.3624213e+01  -1.3992812e+01
   2.3180283e+01  -2.3720604e+01   1.0000000e+02   1.7371240e+01  -1.4964837e+01  -1.0979763e+01
   2.3050332e+01  -2.3669791e+01   1.0000000e+02   1.7694163e+01  -1.5896569e+01  -8.0193820e+00
   2.2915960e+01  -2.3629891e+01   1.0000000e+02   1.8022414e+01  -1.6352299e+01  -5.2313086e+00
   2.2778251e+01  -2.3601225e+01   1.0000000e+02   1.8357668e+01  -1.6343576e+01  -2.8090396e+00
   2.2638311e+01  -2.3584025e+01   1.0000000e+02   1.8706753e+01  -1.6000171e+01  -9.5162288e-01
   2.2497262e+01  -2.3578427e+01   1.0000000e+02   1.9088694e+01  -1.5556981e+01   2.3169770e-01
   2.2356235e+01  -2.3584476e+01   1.0000000e+02   1.9535667e+01  -1.5274259e+01   7.9559886e-01
   2.2216360e+01  -2.3602125e+01   1.0000000e+02   2.0088903e+01  -1.5315671e+01   9.5754730e-01
   2.2078760e+01  -2.3631230e+01   1.0000000e+02   2.0787585e+01  -1.5649649e+01   9.9725642e-01
   2.1944540e+01  -2.3671560e+01   1.0000000e+02   2.1648619e+01  -1.6049364e+01   1.0959011e+00
   2.1814781e+01  -2.3722789e+01   1.0000000e+02   2.2640117e+01  -1.6218572e+01   1.2196625e+00
   2.1690531e+01  -2.3784506e+01   1.0000000e+02   2.3664800e+01  -1.5967867e+01   1.1468282e+00
   2.1572798e+01  -2.3856215e+01   1.0000000e+02   2.4573548e+01  -1.5305356e+01   6.2273224e-01
   2.1462542e+01  -2.3937336e+01   1.0000000e+02   2.5207047e+01  -1.4384457e+01  -4.9100514e-01
   2.1360668e+01  -2.4027215e+01   1.0000000e+02   2.5434168e+01  -1.3386294e+01  -2.1776746e+00
   2.1268016e+01  -2.4125126e+01   1.0000000e+02   2.5160305e+01  -1.2445406e+01  -4.3125172e+00
   2.1185358e+01  -2.4230273e+01   1.0000000e+02   2.4319176e+01  -1.1646154e+01  -6.7053741e+00
   2.1113392e+01  -2.4341804e+01   1.0000000e+02   2.2888620e+01  -1.1041758e+01  -9.1036520e+00
   2.1052731e+01  -2.4458811e+01   1.0000000e+02   2.0942615e+01  -1.0655469e+01  -1.1203736e+01
   2.1003903e+01  -2.4580337e+01   1.0000000e+02   1.8696121e+01  -1.0474665e+01  -1.2724058e+01
   2.0967340e+01  -2.4705388e+01   1.0000000e+02   1.6486425e+01  -1.0466311e+01  -1.3522495e+01
   2.0943381e+01  -2.4832937e+01   1.0000000e+02   1.4678759e+01  -1.0611672e+01  -1.3686331e+01
   2.0932261e+01  -2.4961935e+01   1.0000000e+02   1.3538775e+01  -1.0927666e+01  -1.3533537e+01
   2.0934113e+01  -2.5091316e+01   1.0000000e+02   1.3138070e+01  -1.1448243e+01  -1.3519040e+01
   2.0948962e+01  -2.5220008e+01   1.0000000e+02   1.3335701e+01  -1.2171321e+01  -1.4094092e+01
   2.0976725e+01  -2.5346941e+01   1.0000000e+02   1.3829692e+01  -1.3004520e+01  -1.5580509e+01
   2.1017212e+01  -2.5471057e+01   1.0000000e+02   1.4240044e+01  -1.3746955e+01  -1.8091067e+01
   2.1070124e+01  -2.5591318e+01   1.0000000e+02   1.4194633e+01  -1.4124814e+01  -2.1493674e+01
   2.1135052e+01  -2.5706714e+01   1.0000000e+02   1.3412953e+01  -1.3869942e+01  -2.5419180e+01
   2.1211486e+01  -2.5816275e+01   1.0000000e+02   1.1776470e+01  -1.2811325e+01  -2.9327284e+01
   2.1298812e+01  -2.5919076e+01   1.0000000e+02   9.3597722e+00  -1.0950272e+01  -3.2625788e+01
   2.1396318e+01  -2.6014246e+01   1.0000000e+02   6.4136448e+00  -8.4981537e+00  -3.4817631e+01
   2.1503202e+01  -2.6100978e+01   1.0000000e+02   3.3038542e+00  -5.8508947e+00  -3.5652012e+01
   2.1618575e+01  -2.6178534e+01   1.0000000e+02   4.0325282e-01  -3.4762773e+00  -3.5233832e+01
   2.1741470e+01  -2.6246251e+01   1.0000000e+02  -2.0362776e+00  -1.7382051e+00  -3.4010134e+01
   2.1870849e+01  -2.6303553e+01   1.0000000e+02  -3.9585354e+00  -7.5070481e-01  -3.2601500e+01
   2.2005615e+01  -2.6349947e+01   1.0000000e+02  -5.4728508e+00  -3.4986577e-01  -3.1566716e+01
   2.2144619e+01  -2.6385037e+01   1.0000000e+02  -6.7510145e+00  -1.8120481e-01  -3.1232173e+01
   2.2286673e+01  -2.6408521e+01   1.0000000e+02  -7.9251475e+00   1.6821751e-01  -3.1637895e+01
   2.2430558e+01  -2.6420198e+01   1.0000000e+02  -9.0348294e+00   1.0464024e+00  -3.2570227e+01
   2.2575040e+01  -2.6419967e+01   1.0000000e+02  -1.0026237e+01   2.6403766e+00  -3.3649647e+01
   2.2718877e+01  -2.6407830e+01   1.0000000e+02  -1.0785859e+01   4.9333814e+00  -3.4457180e+01
   2.2860835e+01  -2.6383891e+01   1.0000000e+02  -1.1190186e+01   7.7408136e+00  -3.4654281e+01
   2.2999697e+01  -2.6348357e+01   1.0000000e+02  -1.1158881e+01   1.0795767e+01  -3.4033659e+01
   2.3134275e+01  -2.6301531e+01   1.0000000e+02  -1.0703629e+01   1.3811160e+01  -3.2504226e+01
   2.3263423e+01  -2.6243816e+01   1.0000000e+02  -9.9546057e+00   1.6500044e+01  -3.0090779e+01
   2.3386045e+01  -2.6175706e+01   1.0000000e+02  -9.1309702e+00   1.8618755e+01  -2.6973364e+01
   2.3501106e+01  -2.6097781e+01   1.0000000e+02  -8.4603614e+00   2.0048715e+01  -2.3472216e+01
   2.3607643e+01  -2.6010708e+01   1.0000000e+02  -8.1180809e+00   2.0823665e+01  -1.9936991e+01
   2.3704769e+01  -2.5915227e+01   1.0000000e+02  -8.2392212e+00   2.1053636e+01  -1.6655549e+01
   2.3791685e+01  -2.5812147e+01   1.0000000e+02  -8.9582119e+00   2.0829437e+01  -1.3891802e+01
   2.3867684e+01  -2.5702342e+01   1.0000000e+02  -1.0376014e+01   2.0205888e+01  -1.2002984e+01
   2.3932155e+01  -2.5586739e+01   1.0000000e+02  -1.2417982e+01   1.9256958e+01  -1.1473666e+01
   2.3984591e+01  -2.5466309e+01   1.0000000e+02  -1.4679084e+01   1.8110383e+01  -1.2750761e+01
   2.4024590e+01  -2.5342065e+01   1.0000000e+02  -1.6433765e+01   1.6896266e+01  -1.5943955e+01
   2.4051855e+01  -2.5215044e+01   1.0000000e+02  -1.6889825e+01   1.5652455e+01  -2.0622793e+01
   2.4066201e+01  -2.5086305e+01   1.0000000e+02  -1.5540286e+01   1.4292091e+01  -2.5895312e+01
   2.4067549e+01  -2.4956919e+01   1.0000000e+02  -1.2377001e+01   1.2671602e+01  -3.0715149e+01
   2.4055928e+01  -2.4827958e+01   1.0000000e+02  -7.8712885e+00   1.0691013e+01  -3.4218262e+01
   2.4031475e+01  -2.4700486e+01   1.0000000e+02  -2.7759909e+00   8.3446061e+00  -3.5952161e+01
   2.3994430e+01  -2.4575552e+01   1.0000000e+02   2.1548443e+00   5.7074640e+00  -3.5934929e+01
   2.3945134e+01  -2.4454183e+01   1.0000000e+02   6.4019963e+00   2.8952268e+00  -3.4529074e+01
   2.3884024e+01  -2.4337372e+01   1.0000000e+02   9.7617884e+00   3.1385853e-02  -3.2213777e+01
   2.3811632e+01  -2.4226071e+01   1.0000000e+02   1.2269669e+01  -2.7700000e+00  -2.9396738e+01
   2.3375689e+01  -2.3671439e+01   1.0000000e+02   1.6195178e+01  -1.3478921e+01  -1.2749625e+01
   2.3252789e+01  -2.3610399e+01   1.0000000e+02   1.6420974e+01  -1.4958669e+01  -9.9457997e+00
   2.3124911e+01  -2.3558757e+01   1.0000000e+02   1.6642111e+01  -1.6079303e+01  -7.0887028e+00
   2.2992907e+01  -2.3516857e+01   1.0000000e+02   1.6866333e+01  -1.6745710e+01  -4.2735322e+00
   2.2857652e+01  -2.3484975e+01   1.0000000e+02   1.7098695e+01  -1.6923395e+01  -1.6809595e+00
   2.2720038e+01  -2.3463321e+01   1.0000000e+02   1.7353619e+01  -1.6683993e+01   4.7228924e-01
   2.2580974e+01  -2.3452037e+01   1.0000000e+02   1.7656895e+01  -1.6217944e+01   2.0134440e+00
   2.2441376e+01  -2.3451200e+01   1.0000000e+02   1.8042742e+01  -1.5792719e+01   2.8991280e+00
   2.2302165e+01  -2.3460813e+01   1.0000000e+02   1.8548878e+01  -1.5654564e+01   3.2613326e+00
   2.2164258e+01  -2.3480814e+01   1.0000000e+02   1.9211439e+01  -1.5909886e+01   3.3708271e+00
   2.2028563e+01  -2.3511070e+01   1.0000000e+02   2.0058169e+01  -1.6451966e+01   3.5132435e+00
   2.1895979e+01  -2.3551382e+01   1.0000000e+02   2.1095708e+01  -1.6994085e+01   3.8306851e+00
   2.1767383e+01  -2.3601484e+01   1.0000000e+02   2.2289210e+01  -1.7215309e+01   4.2301297e+00
   2.1643629e+01  -2.3661045e+01   1.0000000e+02   2.3546625e+01  -1.6933329e+01   4.4372071e+00
   2.1525543e+01  -2.3729670e+01   1.0000000e+02   2.4728690e+01  -1.6179962e+01   4.1614790e+00
   2.1413916e+01  -2.3806904e+01   1.0000000e+02   2.5686609e+01  -1.5137142e+01   3.2429764e+00
   2.1309500e+01  -2.3892235e+01   1.0000000e+02   2.6299973e+01  -1.4010948e+01   1.6845454e+00
   2.1213003e+01  -2.3985096e+01   1.0000000e+02   2.6485279e+01  -1.2948568e+01  -4.0870448e-01
   2.1125086e+01  -2.4084868e+01   1.0000000e+02   2.6176199e+01  -1.2033532e+01  -2.8924207e+00
   2.1046355e+01  -2.4190885e+01   1.0000000e+02   2.5310831e+01  -1.1317519e+01  -5.5893439e+00
   2.0977359e+01  -2.4302438e+01   1.0000000e+02   2.3859031e+01  -1.0833269e+01  -8.2622470e+00
   2.0918587e+01  -2.4418778e+01   1.0000000e+02   2.1879734e+01  -1.0578116e+01  -1.0619946e+01
   2.0870461e+01  -2.4539125e+01   1.0000000e+02   1.9559616e+01  -1.0502109e+01  -1.2387572e+01
   2.0833338e+01  -2.4662665e+01   1.0000000e+02   1.7194196e+01  -1.0531464e+01  -1.3407600e+01
   2.0807500e+01  -2.4788566e+01   1.0000000e+02   1.5112669e+01  -1.0618724e+01  -1.3713117e+01
   2.0793157e+01  -2.4915972e+01   1.0000000e+02   1.3581390e+01  -1.0781188e+01  -1.3534463e+01
   2.0790442e+01  -2.5044017e+01   1.0000000e+02   1.2727861e+01  -1.1095143e+01  -1.3238926e+01
   2.0799410e+01  -2.5171828e+01   1.0000000e+02   1.2514837e+01  -1.1644499e+01  -1.3234514e+01
   2.0820036e+01  -2.5298531e+01   1.0000000e+02   1.2762941e+01  -1.2451829e+01  -1.3878781e+01
   2.0852214e+01  -2.5423255e+01   1.0000000e+02   1.3195894e+01  -1.3428945e+01  -1.5413199e+01
   2.0895760e+01  -2.5545142e+01   1.0000000e+02   1.3488141e+01  -1.4371937e+01  -1.7915529e+01
   2.0950406e+01  -2.5663350e+01   1.0000000e+02   1.3320283e+01  -1.5003297e+01  -2.1263244e+01
   2.1015807e+01  -2.5777060e+01   1.0000000e+02   1.2449831e+01  -1.5044503e+01  -2.5129712e+01
   2.1091539e+01  -2.5885481e+01   1.0000000e+02   1.0773202e+01  -1.4294776e+01  -2.9036401e+01
   2.1177102e+01  -2.5987858e+01   1.0000000e+02   8.3489717e+00  -1.2698476e+01  -3.2447266e+01
   2.1271924e+01  -2.6083476e+01   1.0000000e+02   5.3865069e+00  -1.0388720e+01  -3.4879541e+01
   2.1375364e+01  -2.6171663e+01   1.0000000e+02   2.2092299e+00  -7.6848311e+00  -3.6026647e+01
   2.1486712e+01  -2.6251800e+01   1.0000000e+02  -8.2315243e-01  -5.0178649e+00  -3.5870293e+01
   2.1605202e+01  -2.6323323e+01   1.0000000e+02  -3.4289822e+00  -2.7913742e+00  -3.4712766e+01
   2.1730011e+01  -2.6385727e+01   1.0000000e+02  -5.4977977e+00  -1.2386154e+00  -3.3078829e+01
   2.1860266e+01  -2.6438570e+01   1.0000000e+02  -7.0998852e+00  -3.5352061e-01  -3.1527224e+01
   2.1995052e+01  -2.6481479e+01   1.0000000e+02  -8.4109589e+00   7.6696585e-02  -3.0477320e+01
   2.2133419e+01  -2.6514149e+01   1.0000000e+02  -9.6085436e+00   3.7822164e-01  -3.0124975e+01
   2.2274388e+01  -2.6536348e+01   1.0000000e+02  -1.0796727e+01   8.9216765e-01  -3.0440939e+01
   2.2416960e+01  -2.6547918e+01   1.0000000e+02  -1.1977732e+01   1.8906727e+00  -3.1211350e+01
   2.2560121e+01  -2.6548777e+01   1.0000000e+02  -1.3062066e+01   3.5080533e+00  -3.2105846e+01
   2.2702855e+01  -2.6538919e+01   1.0000000e+02  -1.3905210e+01   5.7089714e+00  -3.2775200e+01
   2.2844148e+01  -2.6518414e+01   1.0000000e+02  -1.4359439e+01   8.3220154e+00  -3.2948139e+01
   2.2982999e+01  -2.6487408e+01   1.0000000e+02  -1.4323824e+01   1.1120373e+01  -3.2471678e+01
   2.3118424e+01  -2.6446121e+01   1.0000000e+02  -1.3777605e+01   1.3883319e+01  -3.1281312e+01
   2.3249467e+01  -2.6394845e+01   1.0000000e+02  -1.2797098e+01   1.6400761e+01  -2.9364012e+01
   2.3375208e+01  -2.6333945e+01   1.0000000e+02  -1.1552625e+01   1.8467746e+01  -2.6779123e+01
   2.3494767e+01  -2.6263850e+01   1.0000000e+02  -1.0268316e+01   1.9932056e+01  -2.3699567e+01
   2.3607312e+01  -2.6185057e+01   1.0000000e+02  -9.1570692e+00   2.0761415e+01  -2.0382148e+01
   2.3712068e+01  -2.6098119e+01   1.0000000e+02  -8.3828588e+00   2.1043053e+01  -1.7074239e+01
   2.3808315e+01  -2.6003648e+01   1.0000000e+02  -8.0796718e+00   2.0908388e+01  -1.3960922e+01
   2.3895402e+01  -2.5902307e+01   1.0000000e+02  -8.3870850e+00   2.0461666e+01  -1.1212978e+01
   2.3972745e+01  -2.5794804e+01   1.0000000e+02  -9.4335375e+00   1.9774521e+01  -9.0879230e+00
   2.4039831e+01  -2.5681889e+01   1.0000000e+02  -1.1237298e+01   1.8931696e+01  -7.9770810e+00
   2.4096225e+01  -2.5564347e+01   1.0000000e+02  -1.3573569e+01   1.8060477e+01  -8.3201829e+00
   2.4141569e+01  -2.5442993e+01   1.0000000e+02  -1.5917221e+01   1.7291048e+01  -1.0401166e+01
   2.4175583e+01  -2.5318666e+01   1.0000000e+02  -1.7550442e+01   1.6667929e+01  -1.4142256e+01
   2.4198068e+01  -2.5192222e+01   1.0000000e+02  -1.7809412e+01   1.6096530e+01  -1.9039863e+01
   2.4208907e+01  -2.5064529e+01   1.0000000e+02  -1.6331595e+01   1.5382076e+01  -2.4287417e+01
   2.4208062e+01  -2.4936463e+01   1.0000000e+02  -1.3178044e+01   1.4327020e+01  -2.9003983e+01
   2.4195575e+01  -2.4808896e+01   1.0000000e+02  -8.8040898e+00   1.2811183e+01  -3.2469143e+01
   2.4171566e+01  -2.4682697e+01   1.0000000e+02  -3.9012691e+00   1.0817558e+01  -3.4304496e+01
   2.4136234e+01  -2.4558721e+01   1.0000000e+02   8.4294923e-01   8.4149720e+00  -3.4535381e+01
   2.4089849e+01  -2.4437808e+01   1.0000000e+02   4.9575622e+00   5.7234408e+00  -3.3489226e+01
   2.4032755e+01  -2.4320772e+01   1.0000000e+02   8.2625557e+00   2.8818775e+00  -3.1594960e+01
   2.3965366e+01  -2.4208401e+01   1.0000000e+02   1.0796136e+01   2.5632355e-02  -2.9212635e+01
   2.3888159e+01  -2.4101448e+01   1.0000000e+02   1.2682816e+01  -2.7296839e+00  -2.6572919e+01
   2.3801674e+01  -2.4000630e+01   1.0000000e+02   1.4040937e+01  -5.3027288e+00  -2.3809845e+01
   2.3706508e+01  -2.3906619e+01   1.0000000e+02   1.4966635e+01  -7.6568912e+00  -2.1012194e+01
   2.3603315e+01  -2.3820042e+01   1.0000000e+02   1.5559095e+01  -9.7960602e+00  -1.8237960e+01
   2.3492793e+01  -2.3741475e+01   1.0000000e+02   1.5932487e+01  -1.1738832e+01  -1.5497158e+01
   2.2885146e+01  -2.3358892e+01   1.0000000e+02   1.5686860e+01  -1.7404406e+01  -3.5064964e-02
   2.2747192e+01  -2.3336925e+01   1.0000000e+02   1.5838866e+01  -1.7171920e+01   2.1803932e+00
   2.2607843e+01  -2.3324592e+01   1.0000000e+02   1.6058091e+01  -1.6688577e+01   3.8148033e+00
   2.2467885e+01  -2.3321961e+01   1.0000000e+02   1.6389614e+01  -1.6225932e+01   4.8018860e+00
   2.2328108e+01  -2.3329048e+01   1.0000000e+02   1.6875793e+01  -1.6054275e+01   5.2507232e+00
   2.2189302e+01  -2.3345813e+01   1.0000000e+02   1.7550318e+01  -1.6323735e+01   5.4271996e+00
   2.2052250e+01  -2.3372160e+01   1.0000000e+02   1.8437003e+01  -1.6973708e+01   5.6474044e+00
   2.1917727e+01  -2.3407942e+01   1.0000000e+02   1.9547463e+01  -1.7732810e+01   6.1190681e+00
   2.1786497e+01  -2.3452954e+01   1.0000000e+02   2.0868003e+01  -1.8235413e+01   6.8162299e+00
   2.1659305e+01  -2.3506944e+01   1.0000000e+02   2.2337371e+01  -1.8204062e+01   7.4787434e+00
   2.1536875e+01  -2.3569604e+01   1.0000000e+02   2.3836876e+01  -1.7580687e+01   7.7533214e+00
   2.1419911e+01  -2.3640580e+01   1.0000000e+02   2.5214161e+01  -1.6518044e+01   7.3759806e+00
   2.1309083e+01  -2.3719467e+01   1.0000000e+02   2.6329086e+01  -1.5258760e+01   6.2675034e+00
   2.1205035e+01  -2.3805818e+01   1.0000000e+02   2.7085777e+01  -1.4008786e+01   4.5014645e+00
   2.1108372e+01  -2.3899139e+01   1.0000000e+02   2.7426908e+01  -1.2886789e+01   2.2116739e+00
   2.1019662e+01  -2.3998898e+01   1.0000000e+02   2.7301137e+01  -1.1950078e+01  -4.6858925e-01
   2.0939431e+01  -2.4104524e+01   1.0000000e+02   2.6643335e+01  -1.1239987e+01  -3.3944038e+00
   2.0868161e+01  -2.4215411e+01   1.0000000e+02   2.5399948e+01  -1.0792476e+01  -6.3625098e+00
   2.0806283e+01  -2.4330923e+01   1.0000000e+02   2.3588365e+01  -1.0608741e+01  -9.1013588e+00
   2.0754180e+01  -2.4450392e+01   1.0000000e+02   2.1341536e+01  -1.0626244e+01  -1.1329388e+01
   2.0712181e+01  -2.4573129e+01   1.0000000e+02   1.8898838e+01  -1.0731506e+01  -1.2847632e+01
   2.0680558e+01  -2.4698422e+01   1.0000000e+02   1.6548334e+01  -1.0817101e+01  -1.3608167e+01
   2.0659528e+01  -2.4825544e+01   1.0000000e+02   1.4552662e+01  -1.0846090e+01  -1.3728594e+01
   2.0649244e+01  -2.4953753e+01   1.0000000e+02   1.3089022e+01  -1.0880459e+01  -1.3457441e+01
   2.0649800e+01  -2.5082300e+01   1.0000000e+02   1.2220180e+01  -1.1054070e+01  -1.3113628e+01
   2.0661227e+01  -2.5210431e+01   1.0000000e+02   1.1898116e+01  -1.1503859e+01  -1.3026883e+01
   2.0683492e+01  -2.5337393e+01   1.0000000e+02   1.1984047e+01  -1.2293964e+01  -1.3494763e+01
   2.0716498e+01  -2.5462436e+01   1.0000000e+02   1.2265511e+01  -1.3366502e+01  -1.4748241e+01
   2.0760083e+01  -2.5584819e+01   1.0000000e+02   1.2471846e+01  -1.4536241e+01  -1.6905814e+01
   2.0814019e+01  -2.5703817e+01   1.0000000e+02   1.2312300e+01  -1.5528009e+01  -1.9918821e+01
   2.0878018e+01  -2.5818719e+01   1.0000000e+02   1.1545257e+01  -1.6041286e+01  -2.3547387e+01
   2.0951725e+01  -2.5928839e+01   1.0000000e+02   1.0041767e+01  -1.5821573e+01  -2.7395932e+01
   2.1034725e+01  -2.6033518e+01   1.0000000e+02   7.8081536e+00  -1.4726399e+01  -3.0984698e+01
   2.1126546e+01  -2.6132125e+01   1.0000000e+02   4.9825349e+00  -1.2780766e+01  -3.3828703e+01
   2.1226655e+01  -2.6224067e+01   1.0000000e+02   1.8247683e+00  -1.0202525e+01  -3.5537502e+01
   2.1334468e+01  -2.6308787e+01   1.0000000e+02  -1.3253800e+00  -7.3654904e+00  -3.5936426e+01
   2.1449347e+01  -2.6385773e+01   1.0000000e+02  -4.1446770e+00  -4.6931905e+00  -3.5148073e+01
   2.1570610e+01  -2.6454557e+01   1.0000000e+02  -6.4386571e+00  -2.5217310e+00  -3.3564306e+01
   2.1697530e+01  -2.6514720e+01   1.0000000e+02  -8.1988137e+00  -9.9805018e-01  -3.1707301e+01
   2.1829343e+01  -2.6565895e+01   1.0000000e+02  -9.5697467e+00  -6.0833291e-02  -3.0055936e+01
   2.1965251e+01  -2.6607770e+01   1.0000000e+02  -1.0756064e+01   5.0349013e-01  -2.8926936e+01
   2.2104427e+01  -2.6640090e+01   1.0000000e+02  -1.1929094e+01   9.7801122e-01  -2.8441593e+01
   2.2246024e+01  -2.6662655e+01   1.0000000e+02  -1.3171848e+01   1.6432244e+00  -2.8546984e+01
   2.2389175e+01  -2.6675328e+01   1.0000000e+02  -1.4464463e+01   2.7172976e+00  -2.9053867e+01
   2.2533005e+01  -2.6678032e+01   1.0000000e+02  -1.5696764e+01   4.3021645e+00  -2.9688945e+01
   2.2676632e+01  -2.6670749e+01   1.0000000e+02  -1.6701188e+01   6.3570452e+00  -3.0171808e+01
   2.2819178e+01  -2.6653524e+01   1.0000000e+02  -1.7304140e+01   8.7306053e+00  -3.0292270e+01
   2.2959771e+01  -2.6626464e+01   1.0000000e+02  -1.7381841e+01   1.1235780e+01  -2.9938984e+01
   2.3097552e+01  -2.6589733e+01   1.0000000e+02  -1.6894789e+01   1.3706428e+01  -2.9067844e+01
   2.3231682e+01  -2.6543556e+01   1.0000000e+02  -1.5891630e+01   1.5997772e+01  -2.7656460e+01
   2.3361348e+01  -2.6488215e+01   1.0000000e+02  -1.4498635e+01   1.7959430e+01  -2.5702769e+01
   2.3485766e+01  -2.6424049e+01   1.0000000e+02  -1.2901192e+01   1.9444543e+01  -2.3268913e+01
   2.3604188e+01  -2.6351448e+01   1.0000000e+02  -1.1305607e+01   2.0368591e+01  -2.0503630e+01
   2.3715908e+01  -2.6270853e+01   1.0000000e+02  -9.8932795e+00   2.0754484e+01  -1.7596043e+01
   2.3820262e+01  -2.6182753e+01   1.0000000e+02  -8.8037593e+00   2.0709876e+01  -1.4703262e+01
   2.3916638e+01  -2.6087682e+01   1.0000000e+02  -8.1589307e+00   2.0360207e+01  -1.1928551e+01
   2.4004476e+01  -2.5986214e+01   1.0000000e+02  -8.0940316e+00   1.9800936e+01  -9.3751431e+00
   2.4083268e+01  -2.5878959e+01   1.0000000e+02  -8.7462688e+00   1.9102699e+01  -7.2300414e+00
   2.4152569e+01  -2.5766561e+01   1.0000000e+02  -1.0180944e+01   1.8349837e+01  -5.8053148e+00
   2.4211992e+01  -2.5649693e+01   1.0000000e+02  -1.2285928e+01   1.7663696e+01  -5.4879721e+00
   2.4261212e+01  -2.5529053e+01   1.0000000e+02  -1.4704488e+01   1.7171587e+01  -6.6048344e+00
   2.4299968e+01  -2.5405359e+01   1.0000000e+02  -1.6868292e+01   1.6930294e+01  -9.2673539e+00
   2.4328063e+01  -2.5279343e+01   1.0000000e+02  -1.8137054e+01   1.6866824e+01  -1.3274894e+01
   2.4345364e+01  -2.5151752e+01   1.0000000e+02  -1.7991894e+01   1.6793697e+01  -1.8118984e+01
   2.4351805e+01  -2.5023336e+01   1.0000000e+02  -1.6203673e+01   1.6485549e+01  -2.3084777e+01
   2.4347380e+01  -2.4894850e+01   1.0000000e+02  -1.2915938e+01   1.5755939e+01  -2.7418221e+01
   2.4332151e+01  -2.4767047e+01   1.0000000e+02  -8.6119444e+00   1.4498427e+01  -3.0524329e+01
   2.4306238e+01  -2.4640673e+01   1.0000000e+02  -3.9547967e+00   1.2696514e+01  -3.2132537e+01
   2.4269825e+01  -2.4516463e+01   1.0000000e+02   4.4597927e-01   1.0413862e+01  -3.2333326e+01
   2.4223154e+01  -2.4395138e+01   1.0000000e+02   4.2166660e+00   7.7703779e+00  -3.1456659e+01
   2.4166523e+01  -2.4277400e+01   1.0000000e+02   7.2555122e+00   4.9140156e+00  -2.9878819e+01
   2.4100285e+01  -2.4163929e+01   1.0000000e+02   9.6367197e+00   1.9971682e+00  -2.7881864e+01
   2.4024848e+01  -2.4055378e+01   1.0000000e+02   1.1476768e+01  -8.4309432e-01  -2.5626880e+01
   2.3940665e+01  -2.3952370e+01   1.0000000e+02   1.2856592e+01  -3.5055388e+00  -2.3209103e+01
   2.3848239e+01  -2.3855496e+01   1.0000000e+02   1.3825751e+01  -5.9419464e+00  -2.0714311e+01
   2.3748115e+01  -2.3765309e+01   1.0000000e+02   1.4445114e+01  -8.1597975e+00  -1.8222912e+01
   2.3640879e+01  -2.3682323e+01   1.0000000e+02   1.4808809e+01  -1.0200872e+01  -1.5773108e+01
   2.3527155e+01  -2.3607013e+01   1.0000000e+02   1.5025036e+01  -1.2099556e+01  -1.3334087e+01
   2.3407598e+01  -2.3539804e+01   1.0000000e+02   1.5179360e+01  -1.3841202e+01  -1.0827173e+01
   2.3282895e+01  -2.3481081e+01   1.0000000e+02   1.5315120e+01  -1.5347803e+01  -8.1877575e+00
   2.3153759e+01  -2.3431174e+01   1.0000000e+02   1.5442705e+01  -1.6503165e+01  -5.4248144e+00
   2.3020924e+01  -2.3390368e+01   1.0000000e+02   1.5563272e+01  -1.7202512e+01  -2.6446448e+00
   2.2313461e+01  -2.3201601e+01   1.0000000e+02   1.5130635e+01  -1.6472671e+01   6.9015722e+00
   2.2174341e+01  -2.3218180e+01   1.0000000e+02   1.5847654e+01  -1.6896857e+01   7.1466695e+00
   2.2036814e+01  -2.3243714e+01   1.0000000e+02   1.6807035e+01  -1.7728228e+01   7.5267905e+00
   2.1901552e+01  -2.3278077e+01   1.0000000e+02   1.8020182e+01  -1.8676802e+01   8.2490502e+00
   2.1769220e+01  -2.3321100e+01   1.0000000e+02   1.9483180e+01  -1.9353155e+01   9.2824633e+00
   2.1640468e+01  -2.3372575e+01   1.0000000e+02   2.1151149e+01  -1.9445782e+01   1.0348070e+01
   2.1515932e+01  -2.3432246e+01   1.0000000e+02   2.2916684e+01  -1.8863886e+01   1.1048780e+01
   2.1396230e+01  -2.3499823e+01   1.0000000e+02   2.4623050e+01  -1.7751156e+01   1.1061295e+01
   2.1281956e+01  -2.3574971e+01   1.0000000e+02   2.6111567e+01  -1.6373613e+01   1.0260579e+01
   2.1173683e+01  -2.3657321e+01   1.0000000e+02   2.7268627e+01  -1.4976675e+01   8.7099403e+00
   2.1071957e+01  -2.3746467e+01   1.0000000e+02   2.8037115e+01  -1.3706579e+01   6.5607284e+00
   2.0977292e+01  -2.3841967e+01   1.0000000e+02   2.8387069e+01  -1.2620988e+01   3.9559919e+00
   2.0890172e+01  -2.3943350e+01   1.0000000e+02   2.8273837e+01  -1.1747220e+01   1.0067937e+00
   2.0811049e+01  -2.4050112e+01   1.0000000e+02   2.7626734e+01  -1.1124977e+01  -2.1591781e+00
   2.0740335e+01  -2.4161722e+01   1.0000000e+02   2.6389546e+01  -1.0796888e+01  -5.3404448e+00
   2.0678403e+01  -2.4277624e+01   1.0000000e+02   2.4586437e+01  -1.0761127e+01  -8.2649521e+00
   2.0625589e+01  -2.4397238e+01   1.0000000e+02   2.2357290e+01  -1.0934821e+01  -1.0665403e+01
   2.0582181e+01  -2.4519965e+01   1.0000000e+02   1.9930689e+01  -1.1168609e+01  -1.2371976e+01
   2.0548425e+01  -2.4645188e+01   1.0000000e+02   1.7556371e+01  -1.1310876e+01  -1.3358934e+01
   2.0524521e+01  -2.4772277e+01   1.0000000e+02   1.5442364e+01  -1.1283419e+01  -1.3730000e+01
   2.0510619e+01  -2.4900589e+01   1.0000000e+02   1.3723030e+01  -1.1124954e+01  -1.3670217e+01
   2.0506821e+01  -2.5029474e+01   1.0000000e+02   1.2457766e+01  -1.0979964e+01  -1.3398369e+01
   2.0513178e+01  -2.5158276e+01   1.0000000e+02   1.1647281e+01  -1.1039343e+01  -1.3140584e+01
   2.0529689e+01  -2.5286339e+01   1.0000000e+02   1.1247511e+01  -1.1461193e+01  -1.3126984e+01
   2.0556303e+01  -2.5413007e+01   1.0000000e+02   1.1165586e+01  -1.2304776e+01  -1.3591905e+01
   2.0592913e+01  -2.5537629e+01   1.0000000e+02   1.1241783e+01  -1.3497907e+01  -1.4748438e+01
   2.0639364e+01  -2.5659565e+01   1.0000000e+02   1.1246546e+01  -1.4843200e+01  -1.6725257e+01
   2.0695445e+01  -2.5778184e+01   1.0000000e+02   1.0923130e+01  -1.6058190e+01  -1.9497248e+01
   2.0760893e+01  -2.5892871e+01   1.0000000e+02   1.0061826e+01  -1.6835138e+01  -2.2865589e+01
   2.0835398e+01  -2.6003030e+01   1.0000000e+02   8.5502779e+00  -1.6902972e+01  -2.6496434e+01
   2.0918594e+01  -2.6108086e+01   1.0000000e+02   6.3801486e+00  -1.6086785e+01  -2.9971445e+01
   2.1010072e+01  -2.6207491e+01   1.0000000e+02   3.6493275e+00  -1.4366186e+01  -3.2835494e+01
   2.1109371e+01  -2.6300723e+01   1.0000000e+02   5.7540097e-01  -1.1911206e+01  -3.4681667e+01
   2.1215991e+01  -2.6387291e+01   1.0000000e+02  -2.5263267e+00  -9.0570567e+00  -3.5279720e+01
   2.1329383e+01  -2.6466740e+01   1.0000000e+02  -5.3319306e+00  -6.2099472e+00  -3.4673429e+01
   2.1448965e+01  -2.6538649e+01   1.0000000e+02  -7.6250873e+00  -3.7215435e+00  -3.3173230e+01
   2.1574114e+01  -2.6602638e+01   1.0000000e+02  -9.3678931e+00  -1.7901436e+00  -3.1240900e+01
   2.1704176e+01  -2.6658366e+01   1.0000000e+02  -1.0686117e+01  -4.2967150e-01  -2.9331901e+01
   2.1838468e+01  -2.6705539e+01   1.0000000e+02  -1.1787964e+01   4.9292348e-01  -2.7777231e+01
   2.1976280e+01  -2.6743904e+01   1.0000000e+02  -1.2870543e+01   1.1899541e+00  -2.6743743e+01
   2.2116882e+01  -2.6773258e+01   1.0000000e+02  -1.4058002e+01   1.8931708e+00  -2.6251231e+01
   2.2259526e+01  -2.6793443e+01   1.0000000e+02  -1.5379282e+01   2.8095790e+00  -2.6204993e+01
   2.2403453e+01  -2.6804352e+01   1.0000000e+02  -1.6771842e+01   4.0790867e+00  -2.6426989e+01
   2.2547895e+01  -2.6805927e+01   1.0000000e+02  -1.8098615e+01   5.7338359e+00  -2.6701619e+01
   2.2692082e+01  -2.6798159e+01   1.0000000e+02  -1.9177869e+01   7.6918806e+00  -2.6842548e+01
   2.2835244e+01  -2.6781090e+01   1.0000000e+02  -1.9829477e+01   9.8098197e+00  -2.6741948e+01
   2.2976618e+01  -2.6754810e+01   1.0000000e+02  -1.9928772e+01   1.1956343e+01  -2.6358689e+01
   2.3115452e+01  -2.6719461e+01   1.0000000e+02  -1.9441320e+01   1.4039902e+01  -2.5666143e+01
   2.3251011e+01  -2.6675231e+01   1.0000000e+02  -1.8420329e+01   1.5980822e+01  -2.4621557e+01
   2.3382576e+01  -2.6622354e+01   1.0000000e+02  -1.6982794e+01   1.7676590e+01  -2.3183760e+01
   2.3509455e+01  -2.6561113e+01   1.0000000e+02  -1.5286795e+01   1.9007261e+01  -2.1357976e+01
   2.3630984e+01  -2.6491832e+01   1.0000000e+02  -1.3507546e+01   1.9884058e+01  -1.9222178e+01
   2.3746529e+01  -2.6414879e+01   1.0000000e+02  -1.1807229e+01   2.0296838e+01  -1.6902475e+01
   2.3855494e+01  -2.6330661e+01   1.0000000e+02  -1.0314223e+01   2.0315173e+01  -1.4516154e+01
   2.3957318e+01  -2.6239621e+01   1.0000000e+02  -9.1308419e+00   2.0045061e+01  -1.2133780e+01
   2.4051485e+01  -2.6142240e+01   1.0000000e+02  -8.3626078e+00   1.9581818e+01  -9.7945445e+00
   2.4137520e+01  -2.6039027e+01   1.0000000e+02  -8.1377522e+00   1.8995104e+01  -7.5660696e+00
   2.4214996e+01  -2.5930524e+01   1.0000000e+02  -8.5870348e+00   1.8348029e+01  -5.6064406e+00
   2.4283534e+01  -2.5817298e+01   1.0000000e+02  -9.7777236e+00   1.7724610e+01  -4.1833986e+00
   2.4342803e+01  -2.5699936e+01   1.0000000e+02  -1.1631592e+01   1.7235220e+01  -3.6267124e+00
   2.4392524e+01  -2.5579048e+01   1.0000000e+02  -1.3878705e+01   1.6983082e+01  -4.2304106e+00
   2.4432471e+01  -2.5455260e+01   1.0000000e+02  -1.6077219e+01   1.7005122e+01  -6.1536586e+00
   2.4462467e+01  -2.5329209e+01   1.0000000e+02  -1.7689491e+01   1.7232326e+01  -9.3508094e+00
   2.4482391e+01  -2.5201543e+01   1.0000000e+02  -1.8201028e+01   1.7504965e+01  -1.3530939e+01
   2.4492172e+01  -2.5072917e+01   1.0000000e+02  -1.7269112e+01   1.7627025e+01  -1.8166884e+01
   2.4491793e+01  -2.4943986e+01   1.0000000e+02  -1.4853695e+01   1.7415951e+01  -2.2590128e+01
   2.4481286e+01  -2.4815408e+01   1.0000000e+02  -1.1260267e+01   1.6730277e+01  -2.6169686e+01
   2.4460738e+01  -2.4687835e+01   1.0000000e+02  -7.0470430e+00   1.5488788e+01  -2.8507020e+01
   2.4430282e+01  -2.4561912e+01   1.0000000e+02  -2.8209961e+00   1.3685326e+01  -2.9538446e+01
   2.4390102e+01  -2.4438274e+01   1.0000000e+02   9.7077769e-01   1.1387482e+01  -2.9480601e+01
   2.4340427e+01  -2.4317543e+01   1.0000000e+02   4.1400924e+00   8.7171050e+00  -2.8663747e+01
   2.4281532e+01  -2.4200325e+01   1.0000000e+02   6.7135077e+00   5.8258157e+00  -2.7365887e+01
   2.4213738e+01  -2.4087206e+01   1.0000000e+02   8.8035156e+00   2.8743511e+00  -2.5740532e+01
   2.4137403e+01  -2.3978750e+01   1.0000000e+02   1.0493511e+01   1.1429020e-02  -2.3852722e+01
   2.4052930e+01  -2.3875497e+01   1.0000000e+02   1.1804566e+01  -2.6523107e+00  -2.1759859e+01
   2.3960755e+01  -2.3777959e+01   1.0000000e+02   1.2737272e+01  -5.0676673e+00  -1.9555415e+01
   2.3861352e+01  -2.3686621e+01   1.0000000e+02   1.3326142e+01  -7.2514339e+00  -1.7344796e+01
   2.3755225e+01  -2.3601934e+01   1.0000000e+02   1.3654752e+01  -9.2647759e+00  -1.5187269e+01
   2.3642911e+01  -2.3524316e+01   1.0000000e+02   1.3827630e+01  -1.1170246e+01  -1.3059610e+01
   2.3524973e+01  -2.3454149e+01   1.0000000e+02   1.3929937e+01  -1.2985567e+01  -1.0871812e+01
   2.3401998e+01  -2.3391780e+01   1.0000000e+02   1.4005703e+01  -1.4658536e+01  -8.5257811e+00
   2.3274596e+01  -2.3337513e+01   1.0000000e+02   1.4063879e+01  -1.6079266e+01  -5.9796424e+00
   2.3143399e+01  -2.3291616e+01   1.0000000e+02   1.4100279e+01  -1.7121842e+01  -3.2829966e+00
   2.3009050e+01  -2.3254314e+01   1.0000000e+02   1.4117388e+01  -1.7693117e+01  -5.7532191e-01
   2.2872211e+01  -2.3225789e+01   1.0000000e+02   1.4134558e+01  -1.7775448e+01   1.9395676e+00
   2.2733552e+01  -2.3206182e+01   1.0000000e+02   1.4190726e+01  -1.7459746e+01   4.0407182e+00
   2.2593752e+01  -2.3195587e+01   1.0000000e+02   1.4339704e+01  -1.6952728e+01   5.5617975e+00
   2.2453493e+01  -2.3194058e+01   1.0000000e+02   1.4637856e+01  -1.6535691e+01   6.4686024e+00
   2.1717233e+01  -2.3201844e+01   1.0000000e+02   1.8250180e+01  -2.0680321e+01   1.1980750e+01
   2.1589456e+01  -2.3252610e+01   1.0000000e+02   2.0117234e+01  -2.0733507e+01   1.3458072e+01
   2.1465502e+01  -2.3310923e+01   1.0000000e+02   2.2125726e+01  -2.0065256e+01   1.4506274e+01
   2.1345895e+01  -2.3376537e+01   1.0000000e+02   2.4113466e+01  -1.8846222e+01   1.4787377e+01
   2.1231146e+01  -2.3449175e+01   1.0000000e+02   2.5909158e+01  -1.7362036e+01   1.4174135e+01
   2.1121746e+01  -2.3528533e+01   1.0000000e+02   2.7385378e+01  -1.5872025e+01   1.2740931e+01
   2.1018166e+01  -2.3614274e+01   1.0000000e+02   2.8480082e+01  -1.4527662e+01   1.0661751e+01
   2.0920855e+01  -2.3706036e+01   1.0000000e+02   2.9175566e+01  -1.3377522e+01   8.1003026e+00
   2.0830238e+01  -2.3803431e+01   1.0000000e+02   2.9452295e+01  -1.2427131e+01   5.1630635e+00
   2.0746715e+01  -2.3906044e+01   1.0000000e+02   2.9254751e+01  -1.1697845e+01   1.9329569e+00
   2.0670657e+01  -2.4013440e+01   1.0000000e+02   2.8503721e+01  -1.1241175e+01  -1.4568507e+00
   2.0602407e+01  -2.4125160e+01   1.0000000e+02   2.7156778e+01  -1.1101631e+01  -4.7803453e+00
   2.0542276e+01  -2.4240728e+01   1.0000000e+02   2.5273752e+01  -1.1260119e+01  -7.7569888e+00
   2.0490546e+01  -2.4359647e+01   1.0000000e+02   2.3030475e+01  -1.1605565e+01  -1.0151183e+01
   2.0447460e+01  -2.4481407e+01   1.0000000e+02   2.0663814e+01  -1.1961531e+01  -1.1859697e+01
   2.0413229e+01  -2.4605485e+01   1.0000000e+02   1.8388880e+01  -1.2154786e+01  -1.2926559e+01
   2.0388028e+01  -2.4731343e+01   1.0000000e+02   1.6343754e+01  -1.2087925e+01  -1.3489683e+01
   2.0371993e+01  -2.4858436e+01   1.0000000e+02   1.4584049e+01  -1.1781427e+01  -1.3707737e+01
   2.0365222e+01  -2.4986213e+01   1.0000000e+02   1.3114657e+01  -1.1369583e+01  -1.3712283e+01
   2.0367773e+01  -2.5114117e+01   1.0000000e+02   1.1931050e+01  -1.1054631e+01  -1.3605025e+01
   2.0379663e+01  -2.5241588e+01   1.0000000e+02   1.1041362e+01  -1.1039058e+01  -1.3492606e+01
   2.0400871e+01  -2.5368068e+01   1.0000000e+02   1.0452807e+01  -1.1462156e+01  -1.3527107e+01
   2.0431332e+01  -2.5492999e+01   1.0000000e+02   1.0130917e+01  -1.2358059e+01  -1.3914579e+01
   2.0470940e+01  -2.5615832e+01   1.0000000e+02   9.9610808e+00  -1.3639670e+01  -1.4870922e+01
   2.0519549e+01  -2.5736021e+01   1.0000000e+02   9.7500625e+00  -1.5109145e+01  -1.6539363e+01
   2.0576970e+01  -2.5853033e+01   1.0000000e+02   9.2806990e+00  -1.6493911e+01  -1.8923413e+01
   2.0642973e+01  -2.5966347e+01   1.0000000e+02   8.3796784e+00  -1.7496799e+01  -2.1881290e+01
   2.0717289e+01  -2.6075456e+01   1.0000000e+02   6.9452649e+00  -1.7845766e+01  -2.5160830e+01
   2.0799606e+01  -2.6179872e+01   1.0000000e+02   4.9426971e+00  -1.7343936e+01  -2.8421330e+01
   2.0889578e+01  -2.6279124e+01   1.0000000e+02   2.4190826e+00  -1.5927168e+01  -3.1250137e+01
   2.0986819e+01  -2.6372765e+01   1.0000000e+02  -4.6040113e-01  -1.3708846e+01  -3.3234574e+01
   2.1090905e+01  -2.6460372e+01   1.0000000e+02  -3.4161195e+00  -1.0969155e+01  -3.4094103e+01
   2.1201383e+01  -2.6541549e+01   1.0000000e+02  -6.1333255e+00  -8.0759298e+00  -3.3790549e+01
   2.1317763e+01  -2.6615925e+01   1.0000000e+02  -8.3767511e+00  -5.3739145e+00  -3.2539557e+01
   2.1439528e+01  -2.6683162e+01   1.0000000e+02  -1.0071151e+01  -3.0927375e+00  -3.0720588e+01
   2.1566131e+01  -2.6742955e+01   1.0000000e+02  -1.1306099e+01  -1.3089890e+00  -2.8740471e+01
   2.1697003e+01  -2.6795028e+01   1.0000000e+02  -1.2273225e+01   3.3369627e-02  -2.6920709e+01
   2.1831550e+01  -2.6839145e+01   1.0000000e+02  -1.3179513e+01   1.0705982e+00  -2.5450466e+01
   2.1969161e+01  -2.6875102e+01   1.0000000e+02  -1.4180824e+01   1.9697211e+00  -2.4397703e+01
   2.2109206e+01  -2.6902734e+01   1.0000000e+02  -1.5352951e+01   2.8965680e+00  -2.3740606e+01
   2.2251046e+01  -2.6921915e+01   1.0000000e+02  -1.6690874e+01   3.9914770e+00  -2.3391727e+01
   2.2394029e+01  -2.6932557e+01   1.0000000e+02  -1.8119852e+01   5.3373160e+00  -2.3217208e+01
   2.2537499e+01  -2.6934610e+01   1.0000000e+02  -1.9510241e+01   6.9267610e+00  -2.3073089e+01
   2.2680797e+01  -2.6928065e+01   1.0000000e+02  -2.0697193e+01   8.6647240e+00  -2.2861710e+01
   2.2823264e+01  -2.6912952e+01   1.0000000e+02  -2.1510853e+01   1.0429390e+01  -2.2564467e+01
   2.2964246e+01  -2.6889341e+01   1.0000000e+02  -2.1818096e+01   1.2147034e+01  -2.2204312e+01
   2.3103099e+01  -2.6857339e+01   1.0000000e+02  -2.1560689e+01   1.3803716e+01  -2.1771194e+01
   2.3239186e+01  -2.6817095e+01   1.0000000e+02  -2.0765818e+01   1.5391205e+01  -2.1193170e+01
   2.3371887e+01  -2.6768793e+01   1.0000000e+02  -1.9525358e+01   1.6857151e+01  -2.0375007e+01
   2.3500601e+01  -2.6712653e+01   1.0000000e+02  -1.7966633e+01   1.8105625e+01  -1.9256610e+01
   2.3624745e+01  -2.6648934e+01   1.0000000e+02  -1.6230825e+01   1.9039358e+01  -1.7846056e+01
   2.3743763e+01  -2.6577925e+01   1.0000000e+02  -1.4455301e+01   1.9607901e+01  -1.6210969e+01
   2.3857121e+01  -2.6499951e+01   1.0000000e+02  -1.2757442e+01   1.9827411e+01  -1.4438979e+01
   2.3964317e+01  -2.6415367e+01   1.0000000e+02  -1.1227654e+01   1.9763298e+01  -1.2595212e+01
   2.4064881e+01  -2.6324555e+01   1.0000000e+02  -9.9400195e+00   1.9493609e+01  -1.0704626e+01
   2.4158373e+01  -2.6227927e+01   1.0000000e+02  -8.9748944e+00   1.9082053e+01  -8.7708885e+00
   2.4244391e+01  -2.6125919e+01   1.0000000e+02  -8.4359196e+00   1.8577448e+01  -6.8203250e+00
   2.4322568e+01  -2.6018991e+01   1.0000000e+02  -8.4434062e+00   1.8031407e+01  -4.9474260e+00
   2.4392575e+01  -2.5907622e+01   1.0000000e+02  -9.0934726e+00   1.7513628e+01  -3.3386125e+00
   2.4454124e+01  -2.5792311e+01   1.0000000e+02  -1.0393913e+01   1.7111380e+01  -2.2550897e+00
   2.4506966e+01  -2.5673573e+01   1.0000000e+02  -1.2215027e+01   1.6908921e+01  -1.9738807e+00
   2.4550892e+01  -2.5551935e+01   1.0000000e+02  -1.4285564e+01   1.6951887e+01  -2.7197016e+00
   2.4585736e+01  -2.5427937e+01   1.0000000e+02  -1.6219968e+01   1.7217919e+01  -4.6140079e+00
   2.4611372e+01  -2.5302127e+01   1.0000000e+02  -1.7561795e+01   1.7616639e+01  -7.6218136e+00
   2.4627716e+01  -2.5175060e+01   1.0000000e+02  -1.7870959e+01   1.8016165e+01  -1.1489094e+01
   2.4634725e+01  -2.5047293e+01   1.0000000e+02  -1.6865757e+01   1.8270286e+01  -1.5732896e+01
   2.4632399e+01  -2.4919386e+01   1.0000000e+02  -1.4552388e+01   1.8231794e+01  -1.9745488e+01
   2.4620777e+01  -2.4791896e+01   1.0000000e+02  -1.1248679e+01   1.7765281e+01  -2.2984970e+01
   2.4599937e+01  -2.4665380e+01   1.0000000e+02  -7.4708789e+00   1.6773156e+01  -2.5148165e+01
   2.4569998e+01  -2.4540385e+01   1.0000000e+02  -3.7394562e+00   1.5222489e+01  -2.6230225e+01
   2.4531116e+01  -2.4417453e+01   1.0000000e+02  -4.0789805e-01   1.3152005e+01  -2.6447526e+01
   2.4483484e+01  -2.4297112e+01   1.0000000e+02   2.4037398e+00   1.0657810e+01  -2.6082072e+01
   2.4427330e+01  -2.4179882e+01   1.0000000e+02   4.7554462e+00   7.8731326e+00  -2.5341082e+01
   2.4362920e+01  -2.4066264e+01   1.0000000e+02   6.7654487e+00   4.9524621e+00  -2.4303078e+01
   2.4290548e+01  -2.3956746e+01   1.0000000e+02   8.5014355e+00   2.0554987e+00  -2.2964444e+01
   2.4210544e+01  -2.3851793e+01   1.0000000e+02   9.9492704e+00  -6.7882389e-01  -2.1332381e+01
   2.4123266e+01  -2.3751854e+01   1.0000000e+02   1.1060333e+01  -3.1634609e+00  -1.9483375e+01
   2.4029099e+01  -2.3657353e+01   1.0000000e+02   1.1818829e+01  -5.3819055e+00  -1.7545796e+01
   2.3928457e+01  -2.3568691e+01   1.0000000e+02   1.2271268e+01  -7.3817733e+00  -1.5634503e+01
   2.3821778e+01  -2.3486242e+01   1.0000000e+02   1.2507790e+01  -9.2450372e+00  -1.3792308e+01
   2.3709522e+01  -2.3410356e+01   1.0000000e+02   1.2622224e+01  -1.1044803e+01  -1.1973781e+01
   2.3592172e+01  -2.3341352e+01   1.0000000e+02   1.2680539e+01  -1.2804058e+01  -1.0074428e+01
   2.3470229e+01  -2.3279522e+01   1.0000000e+02   1.2711182e+01  -1.4475001e+01  -7.9876082e+00
   2.3344211e+01  -2.3225124e+01   1.0000000e+02   1.2714947e+01  -1.5951144e+01  -5.6604982e+00
   2.3214650e+01  -2.3178389e+01   1.0000000e+02   1.2683569e+01  -1.7104966e+01  -3.1245751e+00
   2.3082095e+01  -2.3139511e+01   1.0000000e+02   1.2615246e+01  -1.7831219e+01  -4.9585025e-01
   2.2947102e+01  -2.3108655e+01   1.0000000e+02   1.2524248e+01  -1.8085006e+01   2.0441585e+00
   2.2810237e+01  -2.3085949e+01   1.0000000e+02   1.2446604e+01  -1.7913895e+01   4.2839936e+00
   2.2672075e+01  -2.3071488e+01   1.0000000e+02   1.2439272e+01  -1.7473891e+01   6.0396800e+00
   2.2533193e+01  -2.3065334e+01   1.0000000e+02   1.2567744e+01  -1.7010112e+01   7.2236592e+00
   2.2394173e+01  -2.3067512e+01   1.0000000e+02   1.2888038e+01  -1.6794857e+01   7.8966187e+00
   2.2255595e+01  -2.3078012e+01   1.0000000e+02   1.3436422e+01  -1.7034902e+01   8.2734843e+00
   2.2118039e+01  -2.3096791e+01   1.0000000e+02   1.4232788e+01  -1.7778336e+01   8.6653018e+00
   2.1982081e+01  -2.3123771e+01   1.0000000e+02   1.5291857e+01  -1.8865740e+01   9.3631238e+00
   2.1848292e+01  -2.3158837e+01   1.0000000e+02   1.6629367e+01  -1.9963083e+01   1.0503887e+01
   2.1145197e+01  -2.3348129e+01   1.0000000e+02   2.5934324e+01  -1.7899689e+01   1.8173338e+01
   2.1034417e+01  -2.3428449e+01   1.0000000e+02   2.7669576e+01  -1.6348164e+01   1.6637138e+01
   2.0929208e+01  -2.3514920e+01   1.0000000e+02   2.9006765e+01  -1.5001140e+01   1.4425770e+01
   2.0829984e+01  -2.3607211e+01   1.0000000e+02   2.9935045e+01  -1.3876831e+01   1.1718882e+01
   2.0737135e+01  -2.3704970e+01   1.0000000e+02   3.0444265e+01  -1.2957415e+01   8.6184657e+00
   2.0651028e+01  -2.3807824e+01   1.0000000e+02   3.0482425e+01  -1.2253056e+01   5.1880562e+00
   2.0572011e+01  -2.3915378e+01   1.0000000e+02   2.9958185e+01  -1.1818323e+01   1.5391969e+00
   2.0500403e+01  -2.4027220e+01   1.0000000e+02   2.8800849e+01  -1.1713798e+01  -2.1072780e+00
   2.0436500e+01  -2.4142920e+01   1.0000000e+02   2.7042355e+01  -1.1942214e+01  -5.4469046e+00
   2.0380567e+01  -2.4262030e+01   1.0000000e+02   2.4854372e+01  -1.2407050e+01  -8.2023431e+00
   2.0332845e+01  -2.4384091e+01   1.0000000e+02   2.2499295e+01  -1.2926427e+01  -1.0242891e+01
   2.0293540e+01  -2.4508629e+01   1.0000000e+02   2.0224934e+01  -1.3296106e+01  -1.1624171e+01
   2.0262832e+01  -2.4635160e+01   1.0000000e+02   1.8176039e+01  -1.3365021e+01  -1.2527104e+01
   2.0240865e+01  -2.4763189e+01   1.0000000e+02   1.6373287e+01  -1.3088356e+01  -1.3148270e+01
   2.0227752e+01  -2.4892218e+01   1.0000000e+02   1.4757124e+01  -1.2541605e+01  -1.3611728e+01
   2.0223573e+01  -2.5021738e+01   1.0000000e+02   1.3262222e+01  -1.1896446e+01  -1.3944079e+01
   2.0228372e+01  -2.5151242e+01   1.0000000e+02   1.1878539e+01  -1.1369633e+01  -1.4119048e+01
   2.0242159e+01  -2.5280216e+01   1.0000000e+02   1.0662813e+01  -1.1164523e+01  -1.4140178e+01
   2.0264908e+01  -2.5408150e+01   1.0000000e+02   9.6948854e+00  -1.1423451e+01  -1.4106702e+01
   2.0296556e+01  -2.5534537e+01   1.0000000e+02   9.0096425e+00  -1.2196892e+01  -1.4221293e+01
   2.0337006e+01  -2.5658872e+01   1.0000000e+02   8.5461402e+00  -1.3426335e+01  -1.4732413e+01
   2.0386124e+01  -2.5780658e+01   1.0000000e+02   8.1489576e+00  -1.4944170e+01  -1.5839308e+01
   2.0443739e+01  -2.5899405e+01   1.0000000e+02   7.6250858e+00  -1.6498210e+01  -1.7619056e+01
   2.0509646e+01  -2.6014637e+01   1.0000000e+02   6.8079918e+00  -1.7795125e+01  -2.0017677e+01
   2.0583602e+01  -2.6125888e+01   1.0000000e+02   5.5776845e+00  -1.8545272e+01  -2.2875656e+01
   2.0665331e+01  -2.6232708e+01   1.0000000e+02   3.8527706e+00  -1.8507250e+01  -2.5929803e+01
   2.0754524e+01  -2.6334661e+01   1.0000000e+02   1.6140338e+00  -1.7546178e+01  -2.8802008e+01
   2.0850836e+01  -2.6431334e+01   1.0000000e+02  -1.0367079e+00  -1.5694736e+01  -3.1052177e+01
   2.0953892e+01  -2.6522331e+01   1.0000000e+02  -3.8542087e+00  -1.3168187e+01  -3.2318067e+01
   2.1063287e+01  -2.6607279e+01   1.0000000e+02  -6.5169182e+00  -1.0302979e+01  -3.2456243e+01
   2.1178586e+01  -2.6685829e+01   1.0000000e+02  -8.7492436e+00  -7.4481750e+00  -3.1585676e+01
   2.1299326e+01  -2.6757658e+01   1.0000000e+02  -1.0422364e+01  -4.8669775e+00  -3.0017585e+01
   2.1425020e+01  -2.6822469e+01   1.0000000e+02  -1.1582599e+01  -2.6876406e+00  -2.8125023e+01
   2.1555157e+01  -2.6879996e+01   1.0000000e+02  -1.2404618e+01  -9.1222935e-01  -2.6223268e+01
   2.1689206e+01  -2.6929998e+01   1.0000000e+02  -1.3105717e+01   5.3792712e-01  -2.4511394e+01
   2.1826617e+01  -2.6972270e+01   1.0000000e+02  -1.3869633e+01   1.7754689e+00  -2.3077849e+01
   2.1966823e+01  -2.7006635e+01   1.0000000e+02  -1.4807471e+01   2.9199747e+00  -2.1935851e+01
   2.2109244e+01  -2.7032950e+01   1.0000000e+02  -1.5953594e+01   4.0858574e+00  -2.1051869e+01
   2.2253289e+01  -2.7051107e+01   1.0000000e+02  -1.7278482e+01   5.3664345e+00  -2.0356646e+01
   2.2398361e+01  -2.7061029e+01   1.0000000e+02  -1.8703723e+01   6.8027395e+00  -1.9755236e+01
   2.2543856e+01  -2.7062675e+01   1.0000000e+02  -2.0113988e+01   8.3522345e+00  -1.9161223e+01
   2.2689169e+01  -2.7056037e+01   1.0000000e+02  -2.1367645e+01   9.8999186e+00  -1.8553538e+01
   2.2833694e+01  -2.7041145e+01   1.0000000e+02  -2.2312006e+01   1.1335869e+01  -1.7999963e+01
   2.2976832e+01  -2.7018060e+01   1.0000000e+02  -2.2811638e+01   1.2640385e+01  -1.7591925e+01
   2.3117987e+01  -2.6986877e+01   1.0000000e+02  -2.2786302e+01   1.3879712e+01  -1.7337139e+01
   2.3256577e+01  -2.6947727e+01   1.0000000e+02  -2.2234792e+01   1.5115575e+01  -1.7126151e+01
   2.3392029e+01  -2.6900773e+01   1.0000000e+02  -2.1225222e+01   1.6331606e+01  -1.6800532e+01
   2.3523785e+01  -2.6846208e+01   1.0000000e+02  -1.9864676e+01   1.7438656e+01  -1.6242249e+01
   2.3651306e+01  -2.6784261e+01   1.0000000e+02  -1.8273423e+01   1.8331502e+01  -1.5415515e+01
   2.3774074e+01  -2.6715185e+01   1.0000000e+02  -1.6570154e+01   1.8943999e+01  -1.4354709e+01
   2.3891591e+01  -2.6639268e+01   1.0000000e+02  -1.4862134e+01   1.9270671e+01  -1.3123696e+01
   2.4003384e+01  -2.6556821e+01   1.0000000e+02  -1.3237248e+01   1.9352997e+01  -1.1775821e+01
   2.4109009e+01  -2.6468184e+01   1.0000000e+02  -1.1763606e+01   1.9246943e+01  -1.0332260e+01
   2.4208047e+01  -2.6373721e+01   1.0000000e+02  -1.0499217e+01   1.8995812e+01  -8.7868553e+00
   2.4300111e+01  -2.6273816e+01   1.0000000e+02  -9.5080109e+00   1.8627418e+01  -7.1306045e+00
   2.4384844e+01  -2.6168879e+01   1.0000000e+02  -8.8753616e+00   1.8172359e+01  -5.3816398e+00
   2.4461924e+01  -2.6059335e+01   1.0000000e+02  -8.7099277e+00   1.7680604e+01  -3.6146925e+00
   2.4531059e+01  -2.5945630e+01   1.0000000e+02  -9.1137566e+00   1.7222414e+01  -1.9857637e+00
   2.4591995e+01  -2.5828222e+01   1.0000000e+02  -1.0122801e+01   1.6877296e+01  -7.2903109e-01
   2.4644510e+01  -2.5707585e+01   1.0000000e+02  -1.1657568e+01   1.6715580e+01  -1.1248741e-01
   2.4688422e+01  -2.5584204e+01   1.0000000e+02  -1.3515374e+01   1.6774828e+01  -3.8078969e-01
   2.4723581e+01  -2.5458573e+01   1.0000000e+02  -1.5382357e+01   1.7043298e+01  -1.7120836e+00
   2.4749874e+01  -2.5331192e+01   1.0000000e+02  -1.6846812e+01   1.7462674e+01  -4.1586586e+00
   2.4767226e+01  -2.5202570e+01   1.0000000e+02  -1.7461942e+01   1.7942596e+01  -7.5561798e+00
   2.4775596e+01  -2.5073216e+01   1.0000000e+02  -1.6894298e+01   1.8368516e+01  -1.1481789e+01
   2.4774981e+01  -2.4943641e+01   1.0000000e+02  -1.5082355e+01   1.8601360e+01  -1.5350026e+01
   2.4765409e+01  -2.4814356e+01   1.0000000e+02  -1.2282733e+01   1.8488637e+01  -1.8616703e+01
   2.4746948e+01  -2.4685869e+01   1.0000000e+02  -8.9651089e+00   1.7897456e+01  -2.0963288e+01
   2.4719697e+01  -2.4558683e+01   1.0000000e+02  -5.6230422e+00   1.6751650e+01  -2.2362044e+01
   2.4683788e+01  -2.4433295e+01   1.0000000e+02  -2.6029086e+00   1.5048045e+01  -2.3007026e+01
   2.4639386e+01  -2.4310193e+01   1.0000000e+02  -2.6523786e-02   1.2847625e+01  -2.3165548e+01
   2.4586688e+01  -2.4189855e+01   1.0000000e+02   2.1724150e+00   1.0256631e+01  -2.3032759e+01
   2.4525921e+01  -2.4072746e+01   1.0000000e+02   4.1336624e+00   7.4128855e+00  -2.2659332e+01
   2.4457340e+01  -2.3959319e+01   1.0000000e+02   5.9467573e+00   4.4774204e+00  -2.1982109e+01
   2.4381229e+01  -2.3850011e+01   1.0000000e+02   7.5920452e+00   1.6166449e+00  -2.0929111e+01
   2.4297899e+01  -2.3745241e+01   1.0000000e+02   8.9767599e+00  -1.0319012e+00  -1.9516433e+01
   2.4207686e+01  -2.3645412e+01   1.0000000e+02   1.0020751e+01  -3.3940163e+00  -1.7863802e+01
   2.4110948e+01  -2.3550906e+01   1.0000000e+02   1.0715095e+01  -5.4721666e+00  -1.6132055e+01
   2.4008069e+01  -2.3462082e+01   1.0000000e+02   1.1120530e+01  -7.3321078e+00  -1.4443427e+01
   2.3899452e+01  -2.3379281e+01   1.0000000e+02   1.1329117e+01  -9.0707613e+00  -1.2834501e+01
   2.3785519e+01  -2.3302816e+01   1.0000000e+02   1.1425200e+01  -1.0774888e+01  -1.1252571e+01
   2.3666711e+01  -2.3232978e+01   1.0000000e+02   1.1463580e+01  -1.2480946e+01  -9.5861293e+00
   2.3543485e+01  -2.3170032e+01   1.0000000e+02   1.1465355e+01  -1.4151904e+01  -7.7164788e+00
   2.3416313e+01  -2.3114217e+01   1.0000000e+02   1.1427302e+01  -1.5684843e+01  -5.5724896e+00
   2.3285681e+01  -2.3065743e+01   1.0000000e+02   1.1338257e+01  -1.6946013e+01  -3.1655558e+00
   2.3152084e+01  -2.3024795e+01   1.0000000e+02   1.1193626e+01  -1.7814085e+01  -5.9562937e-01
   2.3016028e+01  -2.2991526e+01   1.0000000e+02   1.1004499e+01  -1.8219857e+01   1.9638817e+00
   2.2878028e+01  -2.2966062e+01   1.0000000e+02   1.0804793e+01  -1.8181529e+01   4.2999675e+00
   2.2738605e+01  -2.2948500e+01   1.0000000e+02   1.0653146e+01  -1.7824814e+01   6.2162010e+00
   2.2598284e+01  -2.2938904e+01   1.0000000e+02   1.0621539e+01  -1.7370725e+01   7.5981938e+00
   2.2457593e+01  -2.2937313e+01   1.0000000e+02   1.0774623e+01  -1.7087773e+01   8.4640433e+00
   2.2317061e+01  -2.2943731e+01   1.0000000e+02   1.1154840e+01  -1.7216658e+01   8.9824019e+00
   2.2177218e+01  -2.2958135e+01   1.0000000e+02   1.1784013e+01  -1.7881481e+01   9.4432420e+00
   2.2038590e+01  -2.2980470e+01   1.0000000e+02   1.2677226e+01  -1.9018679e+01   1.0171926e+01
   2.1901700e+01  -2.3010651e+01   1.0000000e+02   1.3856954e+01  -2.0365256e+01   1.1403925e+01
   2.1767065e+01  -2.3048566e+01   1.0000000e+02   1.5353478e+01  -2.1528248e+01   1.3167158e+01
   2.1635195e+01  -2.3094070e+01   1.0000000e+02   1.7181539e+01  -2.2122897e+01   1.5228212e+01
   2.1506590e+01  -2.3146993e+01   1.0000000e+02   1.9300486e+01  -2.1929078e+01   1.7149419e+01
   2.1381739e+01  -2.3207133e+01   1.0000000e+02   2.1588569e+01  -2.0981441e+01   1.8455455e+01
   2.1261121e+01  -2.3274263e+01   1.0000000e+02   2.3862341e+01  -1.9529988e+01   1.8822414e+01
   2.0628649e+01  -2.3624577e+01   1.0000000e+02   3.1195997e+01  -1.3307846e+01   1.2192182e+01
   2.0542963e+01  -2.3726459e+01   1.0000000e+02   3.1434009e+01  -1.2724708e+01   8.6102600e+00
   2.0463818e+01  -2.3832726e+01   1.0000000e+02   3.1110132e+01  -1.2411522e+01   4.7764692e+00
   2.0391495e+01  -2.3943022e+01   1.0000000e+02   3.0137482e+01  -1.2429606e+01   9.0628322e-01
   2.0326254e+01  -2.4056978e+01   1.0000000e+02   2.8525233e+01  -1.2784629e+01  -2.6887642e+00
   2.0268331e+01  -2.4174209e+01   1.0000000e+02   2.6430340e+01  -1.3387403e+01  -5.7076873e+00
   2.0217943e+01  -2.4294321e+01   1.0000000e+02   2.4125426e+01  -1.4064124e+01  -7.9921055e+00
   2.0175281e+01  -2.4416908e+01   1.0000000e+02   2.1892588e+01  -1.4611203e+01  -9.5913586e+00
   2.0140511e+01  -2.4541555e+01   1.0000000e+02   1.9910973e+01  -1.4862476e+01  -1.0717681e+01
   2.0113776e+01  -2.4667837e+01   1.0000000e+02   1.8205422e+01  -1.4737237e+01  -1.1626630e+01
   2.0095189e+01  -2.4795325e+01   1.0000000e+02   1.6674432e+01  -1.4256778e+01  -1.2495764e+01
   2.0084841e+01  -2.4923582e+01   1.0000000e+02   1.5172769e+01  -1.3532403e+01  -1.3359017e+01
   2.0082791e+01  -2.5052169e+01   1.0000000e+02   1.3605381e+01  -1.2733998e+01  -1.4121406e+01
   2.0089074e+01  -2.5180644e+01   1.0000000e+02   1.1984736e+01  -1.2050366e+01  -1.4644033e+01
   2.0103693e+01  -2.5308563e+01   1.0000000e+02   1.0420049e+01  -1.1653902e+01  -1.4850499e+01
   2.0126625e+01  -2.5435483e+01   1.0000000e+02   9.0509837e+00  -1.1675688e+01  -1.4793845e+01
   2.0157816e+01  -2.5560964e+01   1.0000000e+02   7.9706982e+00  -1.2186770e+01  -1.4656061e+01
   2.0197183e+01  -2.5684569e+01   1.0000000e+02   7.1765804e+00  -1.3178488e+01  -1.4689848e+01
   2.0244615e+01  -2.5805866e+01   1.0000000e+02   6.5696635e+00  -1.4547509e+01  -1.5132453e+01
   2.0299970e+01  -2.5924428e+01   1.0000000e+02   5.9992694e+00  -1.6101263e+01  -1.6136689e+01
   2.0363078e+01  -2.6039840e+01   1.0000000e+02   5.3148731e+00  -1.7587460e+01  -1.7751579e+01
   2.0433738e+01  -2.6151694e+01   1.0000000e+02   4.3842339e+00  -1.8731581e+01  -1.9933607e+01
   2.0511723e+01  -2.6259594e+01   1.0000000e+02   3.0857802e+00  -1.9272021e+01  -2.2539181e+01
   2.0596777e+01  -2.6363157e+01   1.0000000e+02   1.3267509e+00  -1.9005090e+01  -2.5292671e+01
   2.0688616e+01  -2.6462014e+01   1.0000000e+02  -8.9231756e-01  -1.7847609e+01  -2.7795270e+01
   2.0786929e+01  -2.6555812e+01   1.0000000e+02  -3.4210445e+00  -1.5885123e+01  -2.9628246e+01
   2.0891382e+01  -2.6644216e+01   1.0000000e+02  -5.9803719e+00  -1.3358132e+01  -3.0507143e+01
   2.1001613e+01  -2.6726907e+01   1.0000000e+02  -8.2632627e+00  -1.0581731e+01  -3.0382493e+01
   2.1117239e+01  -2.6803589e+01   1.0000000e+02  -1.0051826e+01  -7.8442915e+00  -2.9428709e+01
   2.1237854e+01  -2.6873984e+01   1.0000000e+02  -1.1286477e+01  -5.3365779e+00  -2.7945401e+01
   2.1363032e+01  -2.6937839e+01   1.0000000e+02  -1.2063149e+01  -3.1335663e+00  -2.6235255e+01
   2.1492327e+01  -2.6994921e+01   1.0000000e+02  -1.2572461e+01  -1.2224978e+00  -2.4518091e+01
   2.1625278e+01  -2.7045024e+01   1.0000000e+02  -1.3019653e+01   4.5132057e-01  -2.2908943e+01
   2.1761406e+01  -2.7087966e+01   1.0000000e+02  -1.3563962e+01   1.9516133e+00  -2.1446353e+01
   2.1900221e+01  -2.7123590e+01   1.0000000e+02  -1.4294630e+01   3.3423014e+00  -2.0132037e+01
   2.2041219e+01  -2.7151766e+01   1.0000000e+02  -1.5236636e+01   4.6903694e+00  -1.8952766e+01
   2.2183888e+01  -2.7172392e+01   1.0000000e+02  -1.6368806e+01   6.0610253e+00  -1.7880370e+01
   2.2327710e+01  -2.7185392e+01   1.0000000e+02  -1.7640273e+01   7.4939694e+00  -1.6866779e+01
   2.2472160e+01  -2.7190719e+01   1.0000000e+02  -1.8980284e+01   8.9681703e+00  -1.5858622e+01
   2.2616712e+01  -2.7188354e+01   1.0000000e+02  -2.0301338e+01   1.0387022e+01  -1.4844658e+01
   2.2760838e+01  -2.7178304e+01   1.0000000e+02  -2.1497417e+01   1.1625450e+01  -1.3906452e+01
   2.2904013e+01  -2.7160607e+01   1.0000000e+02  -2.2445819e+01   1.2629926e+01  -1.3199529e+01
   2.3045716e+01  -2.7135328e+01   1.0000000e+02  -2.3026375e+01   1.3476511e+01  -1.2840688e+01
   2.3185431e+01  -2.7102558e+01   1.0000000e+02  -2.3157507e+01   1.4309754e+01  -1.2798880e+01
   2.3322653e+01  -2.7062417e+01   1.0000000e+02  -2.2822996e+01   1.5221127e+01  -1.2903854e+01
   2.3456885e+01  -2.7015051e+01   1.0000000e+02  -2.2066816e+01   1.6188495e+01  -1.2954020e+01
   2.3587643e+01  -2.6960633e+01   1.0000000e+02  -2.0967109e+01   1.7111460e+01  -1.2814426e+01
   2.3714460e+01  -2.6899360e+01   1.0000000e+02  -1.9614604e+01   1.7885361e+01  -1.2443258e+01
   2.3836884e+01  -2.6831455e+01   1.0000000e+02  -1.8103098e+01   1.8452549e+01  -1.1861949e+01
   2.3954480e+01  -2.6757162e+01   1.0000000e+02  -1.6524201e+01   1.8811147e+01  -1.1110769e+01
   2.4066835e+01  -2.6676751e+01   1.0000000e+02  -1.4961273e+01   1.8993431e+01  -1.0217291e+01
   2.4173557e+01  -2.6590510e+01   1.0000000e+02  -1.3484037e+01   1.9033794e+01  -9.1862515e+00
   2.4274276e+01  -2.6498750e+01   1.0000000e+02  -1.2146551e+01   1.8945396e+01  -8.0088353e+00
   2.4368646e+01  -2.6401800e+01   1.0000000e+02  -1.0989210e+01   1.8722235e+01  -6.6798063e+00
   2.4456347e+01  -2.6300007e+01   1.0000000e+02  -1.0050302e+01   1.8363972e+01  -5.2055998e+00
   2.4537086e+01  -2.6193732e+01   1.0000000e+02  -9.3888721e+00   1.7897692e+01  -3.6071638e+00
   2.4610595e+01  -2.6083355e+01   1.0000000e+02  -9.0993284e+00   1.7378384e+01  -1.9401687e+00
   2.4676637e+01  -2.5969265e+01   1.0000000e+02  -9.2880487e+00   1.6876836e+01  -3.2993959e-01
   2.4734999e+01  -2.5851867e+01   1.0000000e+02  -1.0015204e+01   1.6469020e+01   1.0178676e+00
   2.4785500e+01  -2.5731573e+01   1.0000000e+02  -1.1246002e+01   1.6224744e+01   1.8528185e+00
   2.4827988e+01  -2.5608807e+01   1.0000000e+02  -1.2839564e+01   1.6191108e+01   1.9294260e+00
   2.4862338e+01  -2.5483997e+01   1.0000000e+02  -1.4549485e+01   1.6379416e+01   1.0451759e+00
   2.4888458e+01  -2.5357578e+01   1.0000000e+02  -1.6019272e+01   1.6764389e+01  -9.0038692e-01
   2.4906283e+01  -2.5229992e+01   1.0000000e+02  -1.6827632e+01   1.7288002e+01  -3.8078588e+00
   2.4915777e+01  -2.5101678e+01   1.0000000e+02  -1.6628477e+01   1.7856001e+01  -7.3222610e+00
   2.4916933e+01  -2.4973082e+01   1.0000000e+02  -1.5313842e+01   1.8333564e+01  -1.0914667e+01
   2.4909775e+01  -2.4844645e+01   1.0000000e+02  -1.3072510e+01   1.8559249e+01  -1.4075401e+01
   2.4894352e+01  -2.4716810e+01   1.0000000e+02  -1.0302652e+01   1.8380938e+01  -1.6491146e+01
   2.4870742e+01  -2.4590012e+01   1.0000000e+02  -7.4445480e+00   1.7694346e+01  -1.8111672e+01
   2.4839050e+01  -2.4464685e+01   1.0000000e+02  -4.8251582e+00   1.6462111e+01  -1.9098302e+01
   2.4799409e+01  -2.4341255e+01   1.0000000e+02  -2.5749663e+00   1.4708912e+01  -1.9699209e+01
   2.4751974e+01  -2.4220141e+01   1.0000000e+02  -6.3898609e-01   1.2504569e+01  -2.0114002e+01
   2.4696929e+01  -2.4101753e+01   1.0000000e+02   1.1359752e+00   9.9504157e+00  -2.0404755e+01
   2.4634479e+01  -2.3986490e+01   1.0000000e+02   2.8831003e+00   7.1753421e+00  -2.0489289e+01
   2.4564853e+01  -2.3874741e+01   1.0000000e+02   4.6254339e+00   4.3328819e+00  -2.0219655e+01
   2.4488303e+01  -2.3766879e+01   1.0000000e+02   6.2677442e+00   1.5824393e+00  -1.9500460e+01
   2.4405102e+01  -2.3663268e+01   1.0000000e+02   7.6709630e+00  -9.4612815e-01  -1.8363204e+01
   2.4315542e+01  -2.3564252e+01   1.0000000e+02   8.7424884e+00  -3.1842070e+00  -1.6947846e+01
   2.4219935e+01  -2.3470163e+01   1.0000000e+02   9.4744264e+00  -5.1333621e+00  -1.5425480e+01
   2.4118612e+01  -2.3381312e+01   1.0000000e+02   9.9238352e+00  -6.8531765e+00  -1.3926836e+01
   2.4011919e+01  -2.3297997e+01   1.0000000e+02   1.0172264e+01  -8.4370781e+00  -1.2507711e+01
   2.3900219e+01  -2.3220492e+01   1.0000000e+02   1.0294687e+01  -9.9816336e+00  -1.1144536e+01
   2.3783890e+01  -2.3149056e+01   1.0000000e+02   1.0343565e+01  -1.1551956e+01  -9.7492037e+00
   2.3663323e+01  -2.3083923e+01   1.0000000e+02   1.0342846e+01  -1.3152248e+01  -8.2018519e+00
   2.3538921e+01  -2.3025309e+01   1.0000000e+02   1.0291104e+01  -1.4716718e+01  -6.3991053e+00
   2.3411099e+01  -2.2973408e+01   1.0000000e+02   1.0174524e+01  -1.6128976e+01  -4.2990318e+00
   2.3280279e+01  -2.2928390e+01   1.0000000e+02   9.9834213e+00  -1.7258101e+01  -1.9429280e+00
   2.3146896e+01  -2.2890403e+01   1.0000000e+02   9.7230250e+00  -1.7995638e+01   5.4602463e-01
   2.3011388e+01  -2.2859574e+01   1.0000000e+02   9.4181762e+00  -1.8292504e+01   2.9820060e+00
   2.2874203e+01  -2.2836002e+01   1.0000000e+02   9.1153755e+00  -1.8191375e+01   5.1587374e+00
   2.2735790e+01  -2.2819766e+01   1.0000000e+02   8.8787158e+00  -1.7835146e+01   6.9101790e+00
   2.2596604e+01  -2.2810919e+01   1.0000000e+02   8.7752056e+00  -1.7441849e+01   8.1640150e+00
   2.2457102e+01  -2.2809489e+01   1.0000000e+02   8.8568597e+00  -1.7257451e+01   8.9708245e+00
   2.2317740e+01  -2.2815482e+01   1.0000000e+02   9.1523385e+00  -1.7495691e+01   9.5090813e+00
   2.2178975e+01  -2.2828878e+01   1.0000000e+02   9.6735287e+00  -1.8267555e+01   1.0060066e+01
   2.2041264e+01  -2.2849633e+01   1.0000000e+02   1.0431826e+01  -1.9519689e+01   1.0938827e+01
   2.1905057e+01  -2.2877679e+01   1.0000000e+02   1.1453332e+01  -2.1017579e+01   1.2388516e+01
   2.1770803e+01  -2.2912923e+01   1.0000000e+02   1.2782394e+01  -2.2394564e+01   1.4473748e+01
   2.1638945e+01  -2.2955249e+01   1.0000000e+02   1.4464778e+01  -2.3260805e+01   1.7015969e+01
   2.1509917e+01  -2.3004519e+01   1.0000000e+02   1.6509809e+01  -2.3343246e+01   1.9611429e+01
   2.1384148e+01  -2.3060570e+01   1.0000000e+02   1.8851171e+01  -2.2596565e+01   2.1753304e+01
   2.1262056e+01  -2.3123216e+01   1.0000000e+02   2.1339952e+01  -2.1213714e+01   2.3015621e+01
   2.1144048e+01  -2.3192253e+01   1.0000000e+02   2.3783407e+01  -1.9521668e+01   2.3194455e+01
   2.1030521e+01  -2.3267450e+01   1.0000000e+02   2.6005174e+01  -1.7832412e+01   2.2328169e+01
   2.0921856e+01  -2.3348559e+01   1.0000000e+02   2.7889610e+01  -1.6339985e+01   2.0607884e+01
   2.0818423e+01  -2.3435312e+01   1.0000000e+02   2.9388844e+01  -1.5104700e+01   1.8252994e+01
   2.0720575e+01  -2.3527420e+01   1.0000000e+02   3.0495357e+01  -1.4104529e+01   1.5421899e+01
   2.0199822e+01  -2.4001405e+01   1.0000000e+02   2.9245298e+01  -1.3644579e+01   3.9710990e-02
   2.0141510e+01  -2.4118786e+01   1.0000000e+02   2.7189386e+01  -1.4459764e+01  -3.0743069e+00
   2.0090327e+01  -2.4238925e+01   1.0000000e+02   2.4933416e+01  -1.5305822e+01  -5.4214046e+00
   2.0046449e+01  -2.4361457e+01   1.0000000e+02   2.2783664e+01  -1.5984871e+01  -7.0785830e+00
   2.0010028e+01  -2.4486012e+01   1.0000000e+02   2.0935567e+01  -1.6345626e+01  -8.3007622e+00
   1.9981199e+01  -2.4612209e+01   1.0000000e+02   1.9409120e+01  -1.6318586e+01  -9.3940931e+00
   1.9960072e+01  -2.4739664e+01   1.0000000e+02   1.8068444e+01  -1.5921065e+01  -1.0579567e+01
   1.9946734e+01  -2.4867988e+01   1.0000000e+02   1.6707087e+01  -1.5240418e+01  -1.1907182e+01
   1.9941251e+01  -2.4996785e+01   1.0000000e+02   1.5158161e+01  -1.4406973e+01  -1.3252014e+01
   1.9943665e+01  -2.5125660e+01   1.0000000e+02   1.3378780e+01  -1.3566791e+01  -1.4392944e+01
   1.9953993e+01  -2.5254214e+01   1.0000000e+02   1.1464734e+01  -1.2862356e+01  -1.5134364e+01
   1.9972227e+01  -2.5382048e+01   1.0000000e+02   9.5920892e+00  -1.2422946e+01  -1.5403469e+01
   1.9998337e+01  -2.5508767e+01   1.0000000e+02   7.9315338e+00  -1.2357988e+01  -1.5279063e+01
   2.0032267e+01  -2.5633974e+01   1.0000000e+02   6.5841777e+00  -1.2742165e+01  -1.4959409e+01
   2.0073934e+01  -2.5757277e+01   1.0000000e+02   5.5570617e+00  -1.3588605e+01  -1.4698213e+01
   2.0123232e+01  -2.5878290e+01   1.0000000e+02   4.7772869e+00  -1.4824391e+01  -1.4735996e+01
   2.0180029e+01  -2.5996631e+01   1.0000000e+02   4.1284782e+00  -1.6288652e+01  -1.5252837e+01
   2.0244169e+01  -2.6111927e+01   1.0000000e+02   3.4799852e+00  -1.7756285e+01  -1.6352612e+01
   2.0315471e+01  -2.6223812e+01   1.0000000e+02   2.6907525e+00  -1.8970590e+01  -1.8056989e+01
   2.0393729e+01  -2.6331930e+01   1.0000000e+02   1.6078516e+00  -1.9674659e+01  -2.0277608e+01
   2.0478713e+01  -2.6435937e+01   1.0000000e+02   1.0132207e-01  -1.9653245e+01  -2.2776281e+01
   2.0570170e+01  -2.6535500e+01   1.0000000e+02  -1.8600355e+00  -1.8793395e+01  -2.5174397e+01
   2.0667823e+01  -2.6630299e+01   1.0000000e+02  -4.1490587e+00  -1.7136615e+01  -2.7054809e+01
   2.0771375e+01  -2.6720030e+01   1.0000000e+02  -6.4997774e+00  -1.4876716e+01  -2.8114195e+01
   2.0880505e+01  -2.6804403e+01   1.0000000e+02  -8.6055875e+00  -1.2291455e+01  -2.8268292e+01
   2.0994874e+01  -2.6883145e+01   1.0000000e+02  -1.0236092e+01  -9.6461955e+00  -2.7649892e+01
   2.1114122e+01  -2.6956002e+01   1.0000000e+02  -1.1310517e+01  -7.1218434e+00  -2.6517078e+01
   2.1237872e+01  -2.7022735e+01   1.0000000e+02  -1.1902668e+01  -4.7942557e+00  -2.5133940e+01
   2.1365730e+01  -2.7083129e+01   1.0000000e+02  -1.2188651e+01  -2.6615032e+00  -2.3683517e+01
   2.1497286e+01  -2.7136986e+01   1.0000000e+02  -1.2371047e+01  -6.9218860e-01  -2.2245527e+01
   2.1632116e+01  -2.7184130e+01   1.0000000e+02  -1.2616294e+01   1.1388432e+00  -2.0829360e+01
   2.1769783e+01  -2.7224407e+01   1.0000000e+02  -1.3025173e+01   2.8448079e+00  -1.9424337e+01
   2.1909840e+01  -2.7257685e+01   1.0000000e+02  -1.3635234e+01   4.4427177e+00  -1.8030398e+01
   2.2051831e+01  -2.7283854e+01   1.0000000e+02  -1.4440883e+01   5.9668414e+00  -1.6657283e+01
   2.2195291e+01  -2.7302829e+01   1.0000000e+02  -1.5414750e+01   7.4615806e+00  -1.5305655e+01
   2.2339751e+01  -2.7314548e+01   1.0000000e+02  -1.6521386e+01   8.9517019e+00  -1.3954120e+01
   2.2484736e+01  -2.7318972e+01   1.0000000e+02  -1.7722362e+01   1.0403469e+01  -1.2574263e+01
   2.2629772e+01  -2.7316086e+01   1.0000000e+02  -1.8973361e+01   1.1709598e+01  -1.1182925e+01
   2.2774382e+01  -2.7305899e+01   1.0000000e+02  -2.0212365e+01   1.2740097e+01  -9.8994964e+00
   2.2918092e+01  -2.7288447e+01   1.0000000e+02  -2.1346024e+01   1.3451103e+01  -8.9290994e+00
   2.3060430e+01  -2.7263784e+01   1.0000000e+02  -2.2253867e+01   1.3952087e+01  -8.4383513e+00
   2.3200932e+01  -2.7231994e+01   1.0000000e+02  -2.2821495e+01   1.4441179e+01  -8.4222853e+00
   2.3339140e+01  -2.7193180e+01   1.0000000e+02  -2.2981666e+01   1.5061264e+01  -8.6998083e+00
   2.3474603e+01  -2.7147468e+01   1.0000000e+02  -2.2727760e+01   1.5817233e+01  -9.0346797e+00
   2.3606883e+01  -2.7095010e+01   1.0000000e+02  -2.2096423e+01   1.6610838e+01  -9.2580685e+00
   2.3735554e+01  -2.7035976e+01   1.0000000e+02  -2.1146034e+01   1.7330093e+01  -9.3045474e+00
   2.3860202e+01  -2.6970559e+01   1.0000000e+02  -1.9947349e+01   1.7911284e+01  -9.1751019e+00
   2.3980429e+01  -2.6898972e+01   1.0000000e+02  -1.8580373e+01   1.8347464e+01  -8.8856806e+00
   2.4095855e+01  -2.6821447e+01   1.0000000e+02  -1.7129401e+01   1.8663482e+01  -8.4369614e+00
   2.4206117e+01  -2.6738237e+01   1.0000000e+02  -1.5676580e+01   1.8882388e+01  -7.8099705e+00
   2.4310869e+01  -2.6649610e+01   1.0000000e+02  -1.4294784e+01   1.8998586e+01  -6.9825999e+00
   2.4409789e+01  -2.6555852e+01   1.0000000e+02  -1.3037038e+01   1.8974226e+01  -5.9548305e+00
   2.4502573e+01  -2.6457265e+01   1.0000000e+02  -1.1927311e+01   1.8766767e+01  -4.7566339e+00
   2.4588941e+01  -2.6354166e+01   1.0000000e+02  -1.0971262e+01   1.8365287e+01  -3.4243530e+00
   2.4668634e+01  -2.6246885e+01   1.0000000e+02  -1.0193149e+01   1.7802346e+01  -1.9769481e+00
   2.4741417e+01  -2.6135763e+01   1.0000000e+02  -9.6689547e+00   1.7139372e+01  -4.3464441e-01
   2.4807080e+01  -2.6021155e+01   1.0000000e+02  -9.5149895e+00   1.6451126e+01   1.1283814e+00
   2.4865436e+01  -2.5903424e+01   1.0000000e+02  -9.8309021e+00   1.5821627e+01   2.5529016e+00
   2.4916324e+01  -2.5782941e+01   1.0000000e+02  -1.0642606e+01   1.5338959e+01   3.6170943e+00
   2.4959606e+01  -2.5660088e+01   1.0000000e+02  -1.1880544e+01   1.5078854e+01   4.0825746e+00
   2.4995171e+01  -2.5535249e+01   1.0000000e+02  -1.3373737e+01   1.5086896e+01   3.7286514e+00
   2.5022932e+01  -2.5408816e+01   1.0000000e+02  -1.4833391e+01   1.5371367e+01   2.4002420e+00
   2.5042827e+01  -2.5281183e+01   1.0000000e+02  -1.5870818e+01   1.5900664e+01   1.0377305e-01
   2.5054820e+01  -2.5152747e+01   1.0000000e+02  -1.6112713e+01   1.6594661e+01  -2.9099367e+00
   2.5058898e+01  -2.5023907e+01   1.0000000e+02  -1.5370867e+01   1.7318437e+01  -6.1858863e+00
   2.5055074e+01  -2.4895061e+01   1.0000000e+02  -1.3735912e+01   1.7897492e+01  -9.2346812e+00
   2.5043384e+01  -2.4766605e+01   1.0000000e+02  -1.1526075e+01   1.8156402e+01  -1.1716034e+01
   2.5023889e+01  -2.4638934e+01   1.0000000e+02  -9.1409132e+00   1.7960516e+01  -1.3528275e+01
   2.4996672e+01  -2.4512440e+01   1.0000000e+02  -6.9095449e+00   1.7239610e+01  -1.4785431e+01
   2.4961839e+01  -2.4387508e+01   1.0000000e+02  -4.9929621e+00   1.5987350e+01  -1.5717763e+01
   2.4919517e+01  -2.4264519e+01   1.0000000e+02  -3.3658968e+00   1.4245436e+01  -1.6545362e+01
   2.4869858e+01  -2.4143846e+01   1.0000000e+02  -1.8738832e+00   1.2086594e+01  -1.7374191e+01
   2.4813030e+01  -2.4025855e+01   1.0000000e+02  -3.3680973e-01   9.6070064e+00  -1.8151697e+01
   2.4749225e+01  -2.3910902e+01   1.0000000e+02   1.3425868e+00   6.9283956e+00  -1.8700099e+01
   2.4678653e+01  -2.3799333e+01   1.0000000e+02   3.1188155e+00   4.1968697e+00  -1.8820991e+01
   2.4601542e+01  -2.3691484e+01   1.0000000e+02   4.8337954e+00   1.5632090e+00  -1.8414214e+01
   2.4518139e+01  -2.3587677e+01   1.0000000e+02   6.3154085e+00  -8.5181993e-01  -1.7528372e+01
   2.4428707e+01  -2.3488223e+01   1.0000000e+02   7.4641559e+00  -2.9841973e+00  -1.6317002e+01
   2.4333526e+01  -2.3393420e+01   1.0000000e+02   8.2726250e+00  -4.8312001e+00  -1.4955570e+01
   2.4232891e+01  -2.3303550e+01   1.0000000e+02   8.7935355e+00  -6.4401722e+00  -1.3582032e+01
   2.4127110e+01  -2.3218880e+01   1.0000000e+02   9.1006316e+00  -7.8922244e+00  -1.2273558e+01
   2.4016507e+01  -2.3139661e+01   1.0000000e+02   9.2643067e+00  -9.2823899e+00  -1.1040565e+01
   2.3901417e+01  -2.3066128e+01   1.0000000e+02   9.3382663e+00  -1.0693221e+01  -9.8276545e+00
   2.3782186e+01  -2.2998499e+01   1.0000000e+02   9.3502049e+00  -1.2164487e+01  -8.5289910e+00
   2.3659173e+01  -2.2936974e+01   1.0000000e+02   9.2990343e+00  -1.3671961e+01  -7.0261615e+00
   2.3532744e+01  -2.2881734e+01   1.0000000e+02   9.1651575e+00  -1.5130643e+01  -5.2372160e+00
   2.3403276e+01  -2.2832943e+01   1.0000000e+02   8.9309798e+00  -1.6420856e+01  -3.1510002e+00
   2.3271152e+01  -2.2790743e+01   1.0000000e+02   8.5982457e+00  -1.7419987e+01  -8.3608533e-01
   2.3136763e+01  -2.2755261e+01   1.0000000e+02   8.1935008e+00  -1.8033709e+01   1.5655641e+00
   2.3000505e+01  -2.2726598e+01   1.0000000e+02   7.7645611e+00  -1.8233099e+01   3.8616457e+00
   2.2862778e+01  -2.2704841e+01   1.0000000e+02   7.3732064e+00  -1.8084452e+01   5.8594511e+00
   2.2723987e+01  -2.2690053e+01   1.0000000e+02   7.0835041e+00  -1.7746075e+01   7.4270630e+00
   2.2584540e+01  -2.2682277e+01   1.0000000e+02   6.9475410e+00  -1.7433089e+01   8.5335828e+00
   2.2444845e+01  -2.2681537e+01   1.0000000e+02   6.9950225e+00  -1.7372070e+01   9.2616793e+00
   2.2305312e+01  -2.2687833e+01   1.0000000e+02   7.2333496e+00  -1.7751799e+01   9.8050847e+00
   2.2166349e+01  -2.2701149e+01   1.0000000e+02   7.6594065e+00  -1.8663901e+01   1.0446729e+01
   2.2028364e+01  -2.2721445e+01   1.0000000e+02   8.2771954e+00  -2.0047721e+01   1.1498334e+01
   2.1891764e+01  -2.2748660e+01   1.0000000e+02   9.1135485e+00  -2.1673984e+01   1.3204459e+01
   2.1756948e+01  -2.2782716e+01   1.0000000e+02   1.0223890e+01  -2.3187042e+01   1.5643862e+01
   2.1624315e+01  -2.2823512e+01   1.0000000e+02   1.1679571e+01  -2.4198899e+01   1.8663989e+01
   2.1494256e+01  -2.2870928e+01   1.0000000e+02   1.3532776e+01  -2.4415358e+01   2.1881371e+01
   2.1367156e+01  -2.2924823e+01   1.0000000e+02   1.5770791e+01  -2.3750665e+01   2.4775561e+01
   2.1243394e+01  -2.2985041e+01   1.0000000e+02   1.8290938e+01  -2.2363296e+01   2.6859084e+01
   2.1123337e+01  -2.3051401e+01   1.0000000e+02   2.0919907e+01  -2.0578234e+01   2.7838034e+01
   2.1007347e+01  -2.3123709e+01   1.0000000e+02   2.3468484e+01  -1.8741490e+01   2.7670183e+01
   2.0895771e+01  -2.3201751e+01   1.0000000e+02   2.5785017e+01  -1.7097269e+01   2.6505135e+01
   2.0788949e+01  -2.3285295e+01   1.0000000e+02   2.7779764e+01  -1.5746224e+01   2.4565565e+01
   2.0687205e+01  -2.3374093e+01   1.0000000e+02   2.9416263e+01  -1.4679811e+01   2.2043940e+01
   2.0590851e+01  -2.3467881e+01   1.0000000e+02   3.0680049e+01  -1.3849982e+01   1.9054136e+01
   2.0500185e+01  -2.3566380e+01   1.0000000e+02   3.1539287e+01  -1.3231986e+01   1.5644830e+01
   2.0415492e+01  -2.3669296e+01   1.0000000e+02   3.1917520e+01  -1.2852598e+01   1.1861395e+01
   2.0337036e+01  -2.3776322e+01   1.0000000e+02   3.1703138e+01  -1.2774112e+01   7.8241731e+00
   2.0265068e+01  -2.3887135e+01   1.0000000e+02   3.0807058e+01  -1.3044824e+01   3.7740190e+00
   1.9872619e+01  -2.4456908e+01   1.0000000e+02   2.1398540e+01  -1.7529957e+01  -5.3135684e+00
   1.9843646e+01  -2.4582259e+01   1.0000000e+02   2.0137914e+01  -1.7571335e+01  -6.5619055e+00
   1.9821870e+01  -2.4708814e+01   1.0000000e+02   1.9047019e+01  -1.7274580e+01  -8.0295753e+00
   1.9807371e+01  -2.4836229e+01   1.0000000e+02   1.7884360e+01  -1.6718024e+01  -9.7596065e+00
   1.9800211e+01  -2.4964157e+01   1.0000000e+02   1.6445199e+01  -1.5997994e+01  -1.1607583e+01
   1.9800432e+01  -2.5092250e+01   1.0000000e+02   1.4651904e+01  -1.5210445e+01  -1.3313633e+01
   1.9808056e+01  -2.5220157e+01   1.0000000e+02   1.2579316e+01  -1.4445792e+01  -1.4621028e+01
   1.9823087e+01  -2.5347527e+01   1.0000000e+02   1.0404974e+01  -1.3794772e+01  -1.5378761e+01
   1.9845505e+01  -2.5474009e+01   1.0000000e+02   8.3253729e+00  -1.3355772e+01  -1.5579857e+01
   1.9875274e+01  -2.5599254e+01   1.0000000e+02   6.4917867e+00  -1.3230994e+01  -1.5340798e+01
   1.9912332e+01  -2.5722915e+01   1.0000000e+02   4.9847623e+00  -1.3504182e+01  -1.4857720e+01
   1.9956600e+01  -2.5844648e+01   1.0000000e+02   3.8157688e+00  -1.4205818e+01  -1.4362540e+01
   2.0007978e+01  -2.5964113e+01   1.0000000e+02   2.9410700e+00  -1.5285734e+01  -1.4085028e+01
   2.0066343e+01  -2.6080976e+01   1.0000000e+02   2.2760224e+00  -1.6609959e+01  -1.4223311e+01
   2.0131552e+01  -2.6194910e+01   1.0000000e+02   1.7006547e+00  -1.7980471e+01  -1.4921181e+01
   2.0203442e+01  -2.6305592e+01   1.0000000e+02   1.0585798e+00  -1.9163166e+01  -1.6240634e+01
   2.0281830e+01  -2.6412711e+01   1.0000000e+02   1.7078352e-01  -1.9917339e+01  -1.8120588e+01
   2.0366512e+01  -2.6515963e+01   1.0000000e+02  -1.1119137e+00  -2.0035644e+01  -2.0343028e+01
   2.0457264e+01  -2.6615054e+01   1.0000000e+02  -2.8306180e+00  -1.9398880e+01  -2.2554806e+01
   2.0553845e+01  -2.6709702e+01   1.0000000e+02  -4.8683280e+00  -1.8022757e+01  -2.4368136e+01
   2.0655992e+01  -2.6799637e+01   1.0000000e+02  -6.9746894e+00  -1.6060127e+01  -2.5497434e+01
   2.0763428e+01  -2.6884600e+01   1.0000000e+02  -8.8583652e+00  -1.3745537e+01  -2.5853456e+01
   2.0875855e+01  -2.6964348e+01   1.0000000e+02  -1.0294242e+01  -1.1310264e+01  -2.5543386e+01
   2.0992960e+01  -2.7038650e+01   1.0000000e+02  -1.1192422e+01  -8.9132909e+00  -2.4789318e+01
   2.1114417e+01  -2.7107293e+01   1.0000000e+02  -1.1606637e+01  -6.6180851e+00  -2.3817291e+01
   2.1239880e+01  -2.7170077e+01   1.0000000e+02  -1.1690973e+01  -4.4169122e+00  -2.2772987e+01
   2.1368996e+01  -2.7226821e+01   1.0000000e+02  -1.1633419e+01  -2.2801160e+00  -2.1696748e+01
   2.1501393e+01  -2.7277360e+01   1.0000000e+02  -1.1597323e+01  -1.9887355e-01  -2.0556210e+01
   2.1636693e+01  -2.7321546e+01   1.0000000e+02  -1.1689406e+01   1.8031462e+00  -1.9304890e+01
   2.1774505e+01  -2.7359252e+01   1.0000000e+02  -1.1956323e+01   3.6898836e+00  -1.7927982e+01
   2.1914431e+01  -2.7390367e+01   1.0000000e+02  -1.2401454e+01   5.4445551e+00  -1.6451438e+01
   2.2056064e+01  -2.7414799e+01   1.0000000e+02  -1.3008250e+01   7.0850834e+00  -1.4918022e+01
   2.2198993e+01  -2.7432479e+01   1.0000000e+02  -1.3758056e+01   8.6507065e+00  -1.3355005e+01
   2.2342800e+01  -2.7443353e+01   1.0000000e+02  -1.4638406e+01   1.0166531e+01  -1.1757965e+01
   2.2487067e+01  -2.7447391e+01   1.0000000e+02  -1.5644040e+01   1.1602487e+01  -1.0105529e+01
   2.2631371e+01  -2.7444580e+01   1.0000000e+02  -1.6771799e+01   1.2853999e+01  -8.4126054e+00
   2.2775291e+01  -2.7434929e+01   1.0000000e+02  -1.8005237e+01   1.3784787e+01  -6.7956167e+00
   2.2918408e+01  -2.7418466e+01   1.0000000e+02  -1.9290490e+01   1.4333647e+01  -5.4753024e+00
   2.3060304e+01  -2.7395238e+01   1.0000000e+02  -2.0522291e+01   1.4599131e+01  -4.6661261e+00
   2.3200566e+01  -2.7365315e+01   1.0000000e+02  -2.1563901e+01   1.4799342e+01  -4.4264404e+00
   2.3338786e+01  -2.7328783e+01   1.0000000e+02  -2.2295420e+01   1.5127175e+01  -4.6151813e+00
   2.3474565e+01  -2.7285749e+01   1.0000000e+02  -2.2651124e+01   1.5636974e+01  -4.9956270e+00
   2.3607511e+01  -2.7236338e+01   1.0000000e+02  -2.2619539e+01   1.6254497e+01  -5.3774883e+00
   2.3737242e+01  -2.7180694e+01   1.0000000e+02  -2.2222354e+01   1.6869919e+01  -5.6760256e+00
   2.3863387e+01  -2.7118979e+01   1.0000000e+02  -2.1500427e+01   1.7415340e+01  -5.8773037e+00
   2.3985587e+01  -2.7051372e+01   1.0000000e+02  -2.0510773e+01   1.7879896e+01  -5.9778659e+00
   2.4103496e+01  -2.6978068e+01   1.0000000e+02  -1.9323875e+01   1.8283691e+01  -5.9514759e+00
   2.4216785e+01  -2.6899280e+01   1.0000000e+02  -1.8018822e+01   1.8644889e+01  -5.7471098e+00
   2.4325137e+01  -2.6815234e+01   1.0000000e+02  -1.6679730e+01   1.8952747e+01  -5.3075095e+00
   2.4428253e+01  -2.6726171e+01   1.0000000e+02  -1.5388649e+01   1.9154096e+01  -4.6032729e+00
   2.4525851e+01  -2.6632348e+01   1.0000000e+02  -1.4206105e+01   1.9169367e+01  -3.6642302e+00
   2.4617666e+01  -2.6534033e+01   1.0000000e+02  -1.3149289e+01   1.8936207e+01  -2.5713683e+00
   2.4703453e+01  -2.6431505e+01   1.0000000e+02  -1.2197220e+01   1.8445281e+01  -1.4030175e+00
   2.4782984e+01  -2.6325057e+01   1.0000000e+02  -1.1333720e+01   1.7738351e+01  -1.8654386e-01
   2.4856053e+01  -2.6214991e+01   1.0000000e+02  -1.0596056e+01   1.6882044e+01   1.0912701e+00
   2.4922472e+01  -2.6101616e+01   1.0000000e+02  -1.0083864e+01   1.5951462e+01   2.4240451e+00
   2.4982074e+01  -2.5985254e+01   1.0000000e+02  -9.9178909e+00   1.5032944e+01   3.7341951e+00
   2.5034713e+01  -2.5866231e+01   1.0000000e+02  -1.0182028e+01   1.4226481e+01   4.8705268e+00
   2.5080263e+01  -2.5744879e+01   1.0000000e+02  -1.0888373e+01   1.3632465e+01   5.6406261e+00
   2.5118620e+01  -2.5621539e+01   1.0000000e+02  -1.1965042e+01   1.3330721e+01   5.8396592e+00
   2.5149700e+01  -2.5496552e+01   1.0000000e+02  -1.3237076e+01   1.3367403e+01   5.2776176e+00
   2.5173439e+01  -2.5370266e+01   1.0000000e+02  -1.4410507e+01   1.3748797e+01   3.8472004e+00
   2.5189795e+01  -2.5243029e+01   1.0000000e+02  -1.5124961e+01   1.4430368e+01   1.6233639e+00
   2.5198747e+01  -2.5115193e+01   1.0000000e+02  -1.5094021e+01   1.5304268e+01  -1.0997542e+00
   2.5200293e+01  -2.4987107e+01   1.0000000e+02  -1.4243340e+01   1.6204978e+01  -3.9025204e+00
   2.5194453e+01  -2.4859124e+01   1.0000000e+02  -1.2739548e+01   1.6941657e+01  -6.4084035e+00
   2.5181265e+01  -2.4731592e+01   1.0000000e+02  -1.0900429e+01   1.7342203e+01  -8.4147782e+00
   2.5160787e+01  -2.4604858e+01   1.0000000e+02  -9.0572958e+00   1.7286643e+01  -9.9268478e+00
   2.5133098e+01  -2.4479266e+01   1.0000000e+02  -7.4381534e+00   1.6719645e+01  -1.1107889e+01
   2.5098292e+01  -2.4355155e+01   1.0000000e+02  -6.1066842e+00   1.5643699e+01  -1.2182287e+01
   2.5056485e+01  -2.4232861e+01   1.0000000e+02  -4.9681358e+00   1.4101623e+01  -1.3328821e+01
   2.5007809e+01  -2.4112712e+01   1.0000000e+02  -3.8322344e+00   1.2160171e+01  -1.4600402e+01
   2.4952412e+01  -2.3995031e+01   1.0000000e+02  -2.5093518e+00   9.9034114e+00  -1.5894740e+01
   2.4890461e+01  -2.3880133e+01   1.0000000e+02  -9.0818857e-01   7.4356098e+00  -1.6991078e+01
   2.4822137e+01  -2.3768323e+01   1.0000000e+02   9.1013095e-01   4.8831219e+00  -1.7650573e+01
   2.4747639e+01  -2.3659901e+01   1.0000000e+02   2.7619469e+00   2.3815155e+00  -1.7733344e+01
   2.4667178e+01  -2.3555153e+01   1.0000000e+02   4.4405721e+00   4.7013618e-02  -1.7254858e+01
   2.4580981e+01  -2.3454357e+01   1.0000000e+02   5.8095297e+00  -2.0483253e+00  -1.6349269e+01
   2.4489288e+01  -2.3357781e+01   1.0000000e+02   6.8301558e+00  -3.8822772e+00  -1.5188877e+01
   2.4392353e+01  -2.3265678e+01   1.0000000e+02   7.5335064e+00  -5.4733819e+00  -1.3925190e+01
   2.4290440e+01  -2.3178292e+01   1.0000000e+02   7.9819368e+00  -6.8704443e+00  -1.2667839e+01
   2.4183827e+01  -2.3095853e+01   1.0000000e+02   8.2450929e+00  -8.1445673e+00  -1.1478590e+01
   2.4072800e+01  -2.3018576e+01   1.0000000e+02   8.3862294e+00  -9.3774912e+00  -1.0363653e+01
   2.3957657e+01  -2.2946665e+01   1.0000000e+02   8.4493631e+00  -1.0641182e+01  -9.2697527e+00
   2.3838706e+01  -2.2880307e+01   1.0000000e+02   8.4483312e+00  -1.1972275e+01  -8.0976484e+00
   2.3716262e+01  -2.2819677e+01   1.0000000e+02   8.3664590e+00  -1.3353621e+01  -6.7381952e+00
   2.3590649e+01  -2.2764933e+01   1.0000000e+02   8.1723239e+00  -1.4716615e+01  -5.1162939e+00
   2.3462196e+01  -2.2716217e+01   1.0000000e+02   7.8449924e+00  -1.5962417e+01  -3.2179521e+00
   2.3331240e+01  -2.2673656e+01   1.0000000e+02   7.3932587e+00  -1.6984866e+01  -1.0938517e+00
   2.3198125e+01  -2.2637362e+01   1.0000000e+02   6.8590841e+00  -1.7690345e+01   1.1455926e+00
   2.3063198e+01  -2.2607429e+01   1.0000000e+02   6.3073286e+00  -1.8027517e+01   3.3406877e+00
   2.2926808e+01  -2.2583934e+01   1.0000000e+02   5.8095127e+00  -1.8022651e+01   5.3156217e+00
   2.2789312e+01  -2.2566939e+01   1.0000000e+02   5.4278551e+00  -1.7790892e+01   6.9324107e+00
   2.2651066e+01  -2.2556488e+01   1.0000000e+02   5.2035766e+00  -1.7511439e+01   8.1346308e+00
   2.2512428e+01  -2.2552608e+01   1.0000000e+02   5.1520956e+00  -1.7387734e+01   8.9628120e+00
   2.2373758e+01  -2.2555309e+01   1.0000000e+02   5.2657515e+00  -1.7609543e+01   9.5545604e+00
   2.2235415e+01  -2.2564584e+01   1.0000000e+02   5.5237845e+00  -1.8309446e+01   1.0138428e+01
   2.2097758e+01  -2.2580409e+01   1.0000000e+02   5.9078784e+00  -1.9509861e+01   1.1004788e+01
   2.1961144e+01  -2.2602743e+01   1.0000000e+02   6.4194350e+00  -2.1084710e+01   1.2438310e+01
   2.1825929e+01  -2.2631528e+01   1.0000000e+02   7.0932364e+00  -2.2765354e+01   1.4628434e+01
   2.1692463e+01  -2.2666689e+01   1.0000000e+02   8.0008224e+00  -2.4195057e+01   1.7590861e+01
   2.1561096e+01  -2.2708134e+01   1.0000000e+02   9.2354483e+00  -2.5019379e+01   2.1123381e+01
   2.1432169e+01  -2.2755756e+01   1.0000000e+02   1.0875156e+01  -2.4997148e+01   2.4819805e+01
   2.1306022e+01  -2.2809431e+01   1.0000000e+02   1.2936375e+01  -2.4094121e+01   2.8164260e+01
   2.1182986e+01  -2.2869017e+01   1.0000000e+02   1.5346749e+01  -2.2501563e+01   3.0687675e+01
   2.1063386e+01  -2.2934361e+01   1.0000000e+02   1.7959347e+01  -2.0554813e+01   3.2108685e+01
   2.0947538e+01  -2.3005290e+01   1.0000000e+02   2.0600178e+01  -1.8596809e+01   3.2381854e+01
   2.0835752e+01  -2.3081620e+01   1.0000000e+02   2.3118498e+01  -1.6866376e+01   3.1639951e+01
   2.0728326e+01  -2.3163150e+01   1.0000000e+02   2.5411882e+01  -1.5461700e+01   3.0085816e+01
   2.0625550e+01  -2.3249666e+01   1.0000000e+02   2.7422735e+01  -1.4373583e+01   2.7899582e+01
   2.0527703e+01  -2.3340941e+01   1.0000000e+02   2.9117215e+01  -1.3550079e+01   2.5195234e+01
   2.0435052e+01  -2.3436734e+01   1.0000000e+02   3.0457869e+01  -1.2955181e+01   2.2026306e+01
   2.0347853e+01  -2.3536793e+01   1.0000000e+02   3.1379236e+01  -1.2598970e+01   1.8427463e+01
   2.0266347e+01  -2.3640853e+01   1.0000000e+02   3.1779928e+01  -1.2531546e+01   1.4474962e+01
   2.0190764e+01  -2.3748638e+01   1.0000000e+02   3.1547609e+01  -1.2806718e+01   1.0339423e+01
   2.0121319e+01  -2.3859862e+01   1.0000000e+02   3.0619904e+01  -1.3433459e+01   6.2965832e+00
   2.0058212e+01  -2.3974230e+01   1.0000000e+02   2.9054599e+01  -1.4341142e+01   2.6699351e+00
   2.0001628e+01  -2.4091435e+01   1.0000000e+02   2.7058860e+01  -1.5380461e+01  -2.8277580e-01
   1.9951736e+01  -2.4211165e+01   1.0000000e+02   2.4940514e+01  -1.6362687e+01  -2.4811035e+00
   1.9908688e+01  -2.4333099e+01   1.0000000e+02   2.2996407e+01  -1.7116021e+01  -4.0607665e+00
   1.9658258e+01  -2.4964135e+01   1.0000000e+02   1.7174726e+01  -1.7162526e+01  -9.6961610e+00
   1.9658331e+01  -2.5092538e+01   1.0000000e+02   1.5357101e+01  -1.6550385e+01  -1.1832039e+01
   1.9665471e+01  -2.5220779e+01   1.0000000e+02   1.3184436e+01  -1.5890659e+01  -1.3556109e+01
   1.9679684e+01  -2.5348537e+01   1.0000000e+02   1.0837297e+01  -1.5232211e+01  -1.4701800e+01
   1.9700956e+01  -2.5475495e+01   1.0000000e+02   8.5100733e+00  -1.4649578e+01  -1.5232429e+01
   1.9729257e+01  -2.5601333e+01   1.0000000e+02   6.3583188e+00  -1.4245694e+01  -1.5214175e+01
   1.9764537e+01  -2.5725737e+01   1.0000000e+02   4.4875194e+00  -1.4133747e+01  -1.4781889e+01
   1.9806729e+01  -2.5848391e+01   1.0000000e+02   2.9598141e+00  -1.4401754e+01  -1.4119995e+01
   1.9855750e+01  -2.5968986e+01   1.0000000e+02   1.7958722e+00  -1.5075404e+01  -1.3449261e+01
   1.9911494e+01  -2.6087216e+01   1.0000000e+02   9.6852529e-01  -1.6097217e+01  -1.3004883e+01
   1.9973842e+01  -2.6202779e+01   1.0000000e+02   3.9396448e-01  -1.7329696e+01  -1.3002610e+01
   2.0042654e+01  -2.6315381e+01   1.0000000e+02  -7.2323363e-02  -1.8576097e+01  -1.3596228e+01
   2.0117773e+01  -2.6424733e+01   1.0000000e+02  -6.2297089e-01  -1.9608471e+01  -1.4829443e+01
   2.0199024e+01  -2.6530553e+01   1.0000000e+02  -1.4542621e+00  -2.0202002e+01  -1.6594351e+01
   2.0286214e+01  -2.6632570e+01   1.0000000e+02  -2.6917733e+00  -2.0180271e+01  -1.8628066e+01
   2.0379135e+01  -2.6730519e+01   1.0000000e+02  -4.3224210e+00  -1.9464634e+01  -2.0575037e+01
   2.0477561e+01  -2.6824146e+01   1.0000000e+02  -6.1805806e+00  -1.8103677e+01  -2.2101913e+01
   2.0581251e+01  -2.6913208e+01   1.0000000e+02  -8.0039932e+00  -1.6258075e+01  -2.3010618e+01
   2.0689946e+01  -2.6997472e+01   1.0000000e+02  -9.5305395e+00  -1.4139873e+01  -2.3290715e+01
   2.0803374e+01  -2.7076718e+01   1.0000000e+02  -1.0586864e+01  -1.1935094e+01  -2.3088299e+01
   2.0921248e+01  -2.7150738e+01   1.0000000e+02  -1.1131904e+01  -9.7491294e+00  -2.2614926e+01
   2.1043269e+01  -2.7219339e+01   1.0000000e+02  -1.1246627e+01  -7.5980244e+00  -2.2046588e+01
   2.1169124e+01  -2.7282339e+01   1.0000000e+02  -1.1085615e+01  -5.4430084e+00  -2.1459210e+01
   2.1298486e+01  -2.7339571e+01   1.0000000e+02  -1.0818059e+01  -3.2446219e+00  -2.0822921e+01
   2.1431022e+01  -2.7390886e+01   1.0000000e+02  -1.0582075e+01  -1.0056899e+00  -2.0047120e+01
   2.1566384e+01  -2.7436147e+01   1.0000000e+02  -1.0462936e+01   1.2186449e+00  -1.9046511e+01
   2.1704218e+01  -2.7475234e+01   1.0000000e+02  -1.0493965e+01   3.3479721e+00  -1.7792510e+01
   2.1844161e+01  -2.7508043e+01   1.0000000e+02  -1.0673497e+01   5.3216505e+00  -1.6324026e+01
   2.1985845e+01  -2.7534487e+01   1.0000000e+02  -1.0987578e+01   7.1294669e+00  -1.4716253e+01
   2.2128894e+01  -2.7554495e+01   1.0000000e+02  -1.1427558e+01   8.8065306e+00  -1.3034635e+01
   2.2272929e+01  -2.7568015e+01   1.0000000e+02  -1.1997700e+01   1.0399111e+01  -1.1304267e+01
   2.2417568e+01  -2.7575011e+01   1.0000000e+02  -1.2715247e+01   1.1919546e+01  -9.5083861e+00
   2.2562425e+01  -2.7575463e+01   1.0000000e+02  -1.3606526e+01   1.3308291e+01  -7.6223417e+00
   2.2707117e+01  -2.7569371e+01   1.0000000e+02  -1.4697392e+01   1.4433903e+01  -5.6815807e+00
   2.2851258e+01  -2.7556750e+01   1.0000000e+02  -1.5991642e+01   1.5163526e+01  -3.8412457e+00
   2.2994466e+01  -2.7537635e+01   1.0000000e+02  -1.7439800e+01   1.5477738e+01  -2.3476263e+00
   2.3136361e+01  -2.7512076e+01   1.0000000e+02  -1.8922915e+01   1.5525056e+01  -1.4030152e+00
   2.3276567e+01  -2.7480142e+01   1.0000000e+02  -2.0278467e+01   1.5542655e+01  -1.0307943e+00
   2.3414714e+01  -2.7441917e+01   1.0000000e+02  -2.1359804e+01   1.5705286e+01  -1.0713516e+00
   2.3550439e+01  -2.7397502e+01   1.0000000e+02  -2.2081548e+01   1.6039599e+01  -1.3091463e+00
   2.3683386e+01  -2.7347016e+01   1.0000000e+02  -2.2419151e+01   1.6466007e+01  -1.6027201e+00
   2.3813207e+01  -2.7290592e+01   1.0000000e+02  -2.2382717e+01   1.6900501e+01  -1.9094566e+00
   2.3939565e+01  -2.7228379e+01   1.0000000e+02  -2.1999866e+01   1.7313378e+01  -2.2237212e+00
   2.4062135e+01  -2.7160542e+01   1.0000000e+02  -2.1312833e+01   1.7718453e+01  -2.5164281e+00
   2.4180600e+01  -2.7087259e+01   1.0000000e+02  -2.0377112e+01   1.8135995e+01  -2.7199887e+00
   2.4294660e+01  -2.7008723e+01   1.0000000e+02  -1.9259466e+01   1.8565150e+01  -2.7425473e+00
   2.4404026e+01  -2.6925139e+01   1.0000000e+02  -1.8040440e+01   1.8966420e+01  -2.4947141e+00
   2.4508422e+01  -2.6836727e+01   1.0000000e+02  -1.6813569e+01   1.9254755e+01  -1.9311726e+00
   2.4607590e+01  -2.6743716e+01   1.0000000e+02  -1.5664430e+01   1.9321690e+01  -1.0920274e+00
   2.4701285e+01  -2.6646349e+01   1.0000000e+02  -1.4634869e+01   1.9086024e+01  -9.8400606e-02
   2.4789280e+01  -2.6544879e+01   1.0000000e+02  -1.3706672e+01   1.8533494e+01   9.1442861e-01
   2.4871364e+01  -2.6439568e+01   1.0000000e+02  -1.2831139e+01   1.7711288e+01   1.8748815e+00
   2.4947340e+01  -2.6330687e+01   1.0000000e+02  -1.1986448e+01   1.6692160e+01   2.7954849e+00
   2.5017033e+01  -2.6218517e+01   1.0000000e+02  -1.1215898e+01   1.5549510e+01   3.7252677e+00
   2.5080283e+01  -2.6103346e+01   1.0000000e+02  -1.0619075e+01   1.4360763e+01   4.6829090e+00
   2.5136947e+01  -2.5985467e+01   1.0000000e+02  -1.0308807e+01   1.3220019e+01   5.6213284e+00
   2.5186903e+01  -2.5865180e+01   1.0000000e+02  -1.0367001e+01   1.2236083e+01   6.4325304e+00
   2.5230044e+01  -2.5742792e+01   1.0000000e+02  -1.0819300e+01   1.1514371e+01   6.9675181e+00
   2.5266284e+01  -2.5618612e+01   1.0000000e+02  -1.1617163e+01   1.1138181e+01   7.0514903e+00
   2.5295552e+01  -2.5492953e+01   1.0000000e+02  -1.2609465e+01   1.1158654e+01   6.5133536e+00
   2.5317797e+01  -2.5366131e+01   1.0000000e+02  -1.3531200e+01   1.1584758e+01   5.2611441e+00
   2.5332986e+01  -2.5238464e+01   1.0000000e+02  -1.4067498e+01   1.2366350e+01   3.3720535e+00
   2.5341104e+01  -2.5110271e+01   1.0000000e+02  -1.3988391e+01   1.3382852e+01   1.1074824e+00
   2.5342152e+01  -2.4981871e+01   1.0000000e+02  -1.3260864e+01   1.4456953e+01  -1.1858455e+00
   2.5336150e+01  -2.4853584e+01   1.0000000e+02  -1.2055466e+01   1.5392411e+01  -3.2222043e+00
   2.5323136e+01  -2.4725725e+01   1.0000000e+02  -1.0655828e+01   1.6015670e+01  -4.8768361e+00
   2.5303161e+01  -2.4598612e+01   1.0000000e+02  -9.3361144e+00   1.6204094e+01  -6.2018510e+00
   2.5276298e+01  -2.4472555e+01   1.0000000e+02  -8.2619573e+00   1.5897016e+01  -7.3736205e+00
   2.5242631e+01  -2.4347866e+01   1.0000000e+02  -7.4439902e+00   1.5091489e+01  -8.6038323e+00
   2.5202263e+01  -2.4224848e+01   1.0000000e+02  -6.7503723e+00   1.3826234e+01  -1.0046509e+01
   2.5155311e+01  -2.4103801e+01   1.0000000e+02  -5.9668494e+00   1.2163561e+01  -1.1729124e+01
   2.5101907e+01  -2.3985020e+01   1.0000000e+02  -4.8851006e+00   1.0179558e+01  -1.3525463e+01
   2.5042198e+01  -2.3868793e+01   1.0000000e+02  -3.3967898e+00   7.9648954e+00  -1.5185520e+01
   2.4976345e+01  -2.3755401e+01   1.0000000e+02  -1.5543136e+00   5.6282769e+00  -1.6427434e+01
   2.4904522e+01  -2.3645119e+01   1.0000000e+02   4.4617876e-01   3.2900009e+00  -1.7057008e+01
   2.4826917e+01  -2.3538210e+01   1.0000000e+02   2.3595426e+00   1.0603169e+00  -1.7041357e+01
   2.4743728e+01  -2.3434933e+01   1.0000000e+02   3.9982141e+00  -9.8465385e-01  -1.6489242e+01
   2.4655167e+01  -2.3335535e+01   1.0000000e+02   5.2795702e+00  -2.8113604e+00  -1.5570957e+01
   2.4561458e+01  -2.3240254e+01   1.0000000e+02   6.2075471e+00  -4.4197519e+00  -1.4449280e+01
   2.4462834e+01  -2.3149316e+01   1.0000000e+02   6.8324368e+00  -5.8314657e+00  -1.3253153e+01
   2.4359540e+01  -2.3062940e+01   1.0000000e+02   7.2228136e+00  -7.0851868e+00  -1.2075314e+01
   2.4251828e+01  -2.2981331e+01   1.0000000e+02   7.4505047e+00  -8.2359166e+00  -1.0967828e+01
   2.4139963e+01  -2.2904682e+01   1.0000000e+02   7.5764960e+00  -9.3487681e+00  -9.9325011e+00
   2.4024215e+01  -2.2833175e+01   1.0000000e+02   7.6352150e+00  -1.0483705e+01  -8.9184161e+00
   2.3904864e+01  -2.2766980e+01   1.0000000e+02   7.6247096e+00  -1.1674938e+01  -7.8371097e+00
   2.3782195e+01  -2.2706254e+01   1.0000000e+02   7.5117307e+00  -1.2915435e+01  -6.5952548e+00
   2.3656504e+01  -2.2651139e+01   1.0000000e+02   7.2535091e+00  -1.4157724e+01  -5.1308999e+00
   2.3528089e+01  -2.2601767e+01   1.0000000e+02   6.8267314e+00  -1.5330250e+01  -3.4322144e+00
   2.3397254e+01  -2.2558253e+01   1.0000000e+02   6.2478502e+00  -1.6353038e+01  -1.5334513e+00
   2.3264310e+01  -2.2520700e+01   1.0000000e+02   5.5747392e+00  -1.7145020e+01   4.9326882e-01
   2.3129570e+01  -2.2489197e+01   1.0000000e+02   4.8909782e+00  -1.7639469e+01   2.5372521e+00
   2.2993353e+01  -2.2463818e+01   1.0000000e+02   4.2824005e+00  -1.7818658e+01   4.4571651e+00
   2.2855977e+01  -2.2444622e+01   1.0000000e+02   3.8160132e+00  -1.7743518e+01   6.1169348e+00
   2.2717767e+01  -2.2431654e+01   1.0000000e+02   3.5280473e+00  -1.7549030e+01   7.4320693e+00
   2.2579046e+01  -2.2424946e+01   1.0000000e+02   3.4225638e+00  -1.7411896e+01   8.3975098e+00
   2.2440140e+01  -2.2424512e+01   1.0000000e+02   3.4773061e+00  -1.7514791e+01   9.0946983e+00
   2.2301374e+01  -2.2430354e+01   1.0000000e+02   3.6536026e+00  -1.8011436e+01   9.6926475e+00
   2.2163073e+01  -2.2442458e+01   1.0000000e+02   3.9094884e+00  -1.8981467e+01   1.0438394e+01
   2.2025563e+01  -2.2460796e+01   1.0000000e+02   4.2163132e+00  -2.0383396e+01   1.1615731e+01
   2.1889167e+01  -2.2485325e+01   1.0000000e+02   4.5762583e+00  -2.2035952e+01   1.3471306e+01
   2.1754204e+01  -2.2515986e+01   1.0000000e+02   5.0351747e+00  -2.3644174e+01   1.6135863e+01
   2.1620993e+01  -2.2552708e+01   1.0000000e+02   5.6832841e+00  -2.4860888e+01   1.9565369e+01
   2.1489849e+01  -2.2595404e+01   1.0000000e+02   6.6360528e+00  -2.5372708e+01   2.3514170e+01
   2.1361081e+01  -2.2643974e+01   1.0000000e+02   7.9944588e+00  -2.4998954e+01   2.7560772e+01
   2.1234995e+01  -2.2698303e+01   1.0000000e+02   9.7987614e+00  -2.3765960e+01   3.1205551e+01
   2.1111892e+01  -2.2758262e+01   1.0000000e+02   1.2002353e+01  -2.1905439e+01   3.4015723e+01
   2.0992065e+01  -2.2823711e+01   1.0000000e+02   1.4484054e+01  -1.9764443e+01   3.5744990e+01
   2.0875802e+01  -2.2894493e+01   1.0000000e+02   1.7090964e+01  -1.7675777e+01   3.6364156e+01
   2.0763384e+01  -2.2970442e+01   1.0000000e+02   1.9684305e+01  -1.5860197e+01   3.5999335e+01
   2.0655083e+01  -2.3051378e+01   1.0000000e+02   2.2162021e+01  -1.4400996e+01   3.4830447e+01
   2.0551163e+01  -2.3137108e+01   1.0000000e+02   2.4454931e+01  -1.3281475e+01   3.3010327e+01
   2.0451879e+01  -2.3227427e+01   1.0000000e+02   2.6509124e+01  -1.2447910e+01   3.0632772e+01
   2.0357477e+01  -2.3322122e+01   1.0000000e+02   2.8267500e+01  -1.1863448e+01   2.7743516e+01
   2.0268192e+01  -2.3420965e+01   1.0000000e+02   2.9655343e+01  -1.1534124e+01   2.4376078e+01
   2.0184248e+01  -2.3523721e+01   1.0000000e+02   3.0573985e+01  -1.1503451e+01   2.0595590e+01
   2.0105859e+01  -2.3630143e+01   1.0000000e+02   3.0910631e+01  -1.1822273e+01   1.6539169e+01
   2.0033225e+01  -2.3739975e+01   1.0000000e+02   3.0574863e+01  -1.2507727e+01   1.2434905e+01
   1.9966537e+01  -2.3852954e+01   1.0000000e+02   2.9557041e+01  -1.3509783e+01   8.5778534e+00
   1.9905970e+01  -2.3968805e+01   1.0000000e+02   2.7978248e+01  -1.4703418e+01   5.2541060e+00
   1.9851686e+01  -2.4087250e+01   1.0000000e+02   2.6089799e+01  -1.5914610e+01   2.6362109e+00
   1.9803834e+01  -2.4208001e+01   1.0000000e+02   2.4203568e+01  -1.6968835e+01   7.0602341e-01
   1.9762549e+01  -2.4330765e+01   1.0000000e+02   2.2580434e+01  -1.7737915e+01  -7.4695775e-01
   1.9727950e+01  -2.4455242e+01   1.0000000e+02   2.1334218e+01  -1.8164237e+01  -2.0450748e+00
   1.9700141e+01  -2.4581127e+01   1.0000000e+02   2.0397151e+01  -1.8257765e+01  -3.4988233e+00
   1.9679211e+01  -2.4708114e+01   1.0000000e+02   1.9557752e+01  -1.8074303e+01  -5.2925859e+00
   1.9665231e+01  -2.4835888e+01   1.0000000e+02   1.8552409e+01  -1.7687049e+01  -7.4205833e+00
   1.9561507e+01  -2.5500819e+01   1.0000000e+02   8.3942283e+00  -1.5876646e+01  -1.4317952e+01
   1.9589726e+01  -2.5626946e+01   1.0000000e+02   6.0657213e+00  -1.5341818e+01  -1.4520721e+01
   1.9624627e+01  -2.5751714e+01   1.0000000e+02   3.9548074e+00  -1.4995481e+01  -1.4225844e+01
   1.9666153e+01  -2.5874835e+01   1.0000000e+02   2.1539411e+00  -1.4955978e+01  -1.3559800e+01
   1.9714228e+01  -2.5996026e+01   1.0000000e+02   7.3533690e-01  -1.5297321e+01  -1.2711352e+01
   1.9768761e+01  -2.6115005e+01   1.0000000e+02  -2.7399425e-01  -1.6019733e+01  -1.1922057e+01
   1.9829646e+01  -2.6231497e+01   1.0000000e+02  -9.1766568e-01  -1.7039517e+01  -1.1448388e+01
   1.9896760e+01  -2.6345231e+01   1.0000000e+02  -1.3209209e+00  -1.8199165e+01  -1.1505571e+01
   1.9969966e+01  -2.6455941e+01   1.0000000e+02  -1.6774043e+00  -1.9291964e+01  -1.2207159e+01
   2.0049110e+01  -2.6563367e+01   1.0000000e+02  -2.2039690e+00  -2.0096180e+01  -1.3517467e+01
   2.0134023e+01  -2.6667257e+01   1.0000000e+02  -3.0684779e+00  -2.0417735e+01  -1.5242021e+01
   2.0224521e+01  -2.6767366e+01   1.0000000e+02  -4.3203548e+00  -2.0136091e+01  -1.7075574e+01
   2.0320404e+01  -2.6863457e+01   1.0000000e+02  -5.8635468e+00  -1.9238384e+01  -1.8697647e+01
   2.0421461e+01  -2.6955302e+01   1.0000000e+02  -7.4892723e+00  -1.7823228e+01  -1.9876036e+01
   2.0527463e+01  -2.7042683e+01   1.0000000e+02  -8.9516583e+00  -1.6064733e+01  -2.0533158e+01
   2.0638171e+01  -2.7125392e+01   1.0000000e+02  -1.0050598e+01  -1.4146878e+01  -2.0748411e+01
   2.0753330e+01  -2.7203230e+01   1.0000000e+02  -1.0687901e+01  -1.2198245e+01  -2.0697941e+01
   2.0872674e+01  -2.7276011e+01   1.0000000e+02  -1.0879616e+01  -1.0258190e+01  -2.0563095e+01
   2.0995925e+01  -2.7343561e+01   1.0000000e+02  -1.0728705e+01  -8.2879870e+00  -2.0450397e+01
   2.1122795e+01  -2.7405716e+01   1.0000000e+02  -1.0377814e+01  -6.2169113e+00  -2.0355440e+01
   2.1252984e+01  -2.7462327e+01   1.0000000e+02  -9.9642622e+00  -3.9984655e+00  -2.0179171e+01
   2.1386183e+01  -2.7513257e+01   1.0000000e+02  -9.5909283e+00  -1.6497220e+00  -1.9782832e+01
   2.1522075e+01  -2.7558383e+01   1.0000000e+02  -9.3155680e+00   7.4432294e-01  -1.9055503e+01
   2.1660335e+01  -2.7597595e+01   1.0000000e+02  -9.1558515e+00   3.0652240e+00  -1.7965027e+01
   2.1800629e+01  -2.7630798e+01   1.0000000e+02  -9.1057665e+00   5.2171963e+00  -1.6566461e+01
   2.1942620e+01  -2.7657911e+01   1.0000000e+02  -9.1559878e+00   7.1689217e+00  -1.4963677e+01
   2.2085964e+01  -2.7678868e+01   1.0000000e+02  -9.3094023e+00   8.9534959e+00  -1.3252425e+01
   2.2230314e+01  -2.7693619e+01   1.0000000e+02  -9.5874051e+00   1.0632457e+01  -1.1480148e+01
   2.2375319e+01  -2.7702127e+01   1.0000000e+02  -1.0027781e+01   1.2246790e+01  -9.6364595e+00
   2.2520628e+01  -2.7704372e+01   1.0000000e+02  -1.0677515e+01   1.3772413e+01  -7.6755423e+00
   2.2665886e+01  -2.7700348e+01   1.0000000e+02  -1.1583661e+01   1.5100167e+01  -5.5739005e+00
   2.2810741e+01  -2.7690065e+01   1.0000000e+02  -1.2779037e+01   1.6072931e+01  -3.4053923e+00
   2.2954841e+01  -2.7673548e+01   1.0000000e+02  -1.4255806e+01   1.6586017e+01  -1.3701823e+00
   2.3097836e+01  -2.7650838e+01   1.0000000e+02  -1.5934127e+01   1.6683729e+01   2.8122552e-01
   2.3239380e+01  -2.7621989e+01   1.0000000e+02  -1.7656651e+01   1.6556835e+01   1.3906555e+00
   2.3379131e+01  -2.7587071e+01   1.0000000e+02  -1.9233349e+01   1.6429444e+01   1.9804615e+00
   2.3516752e+01  -2.7546171e+01   1.0000000e+02  -2.0513605e+01   1.6430239e+01   2.2075835e+00
   2.3651913e+01  -2.7499386e+01   1.0000000e+02  -2.1426614e+01   1.6557182e+01   2.2309259e+00
   2.3784289e+01  -2.7446830e+01   1.0000000e+02  -2.1964791e+01   1.6750054e+01   2.1228777e+00
   2.3913567e+01  -2.7388631e+01   1.0000000e+02  -2.2146551e+01   1.6977052e+01   1.8929024e+00
   2.4039440e+01  -2.7324929e+01   1.0000000e+02  -2.1997077e+01   1.7252402e+01   1.5614489e+00
   2.4161611e+01  -2.7255877e+01   1.0000000e+02  -2.1546814e+01   1.7599869e+01   1.1969887e+00
   2.4279795e+01  -2.7181642e+01   1.0000000e+02  -2.0832852e+01   1.8019469e+01   9.0457258e-01
   2.4393717e+01  -2.7102402e+01   1.0000000e+02  -1.9902830e+01   1.8475970e+01   8.0103532e-01
   2.4503114e+01  -2.7018346e+01   1.0000000e+02  -1.8826029e+01   1.8893326e+01   9.8738005e-01
   2.4607736e+01  -2.6929676e+01   1.0000000e+02  -1.7698655e+01   1.9156833e+01   1.5043851e+00
   2.4707347e+01  -2.6836603e+01   1.0000000e+02  -1.6621804e+01   1.9145318e+01   2.2901388e+00
   2.4801723e+01  -2.6739348e+01   1.0000000e+02  -1.5657938e+01   1.8785536e+01   3.1908082e+00
   2.4890655e+01  -2.6638142e+01   1.0000000e+02  -1.4802879e+01   1.8083285e+01   4.0366926e+00
   2.4973949e+01  -2.6533223e+01   1.0000000e+02  -1.4002682e+01   1.7104317e+01   4.7282348e+00
   2.5051423e+01  -2.6424839e+01   1.0000000e+02  -1.3204826e+01   1.5929711e+01   5.2667994e+00
   2.5122915e+01  -2.6313244e+01   1.0000000e+02  -1.2403700e+01   1.4629026e+01   5.7191183e+00
   2.5188275e+01  -2.6198700e+01   1.0000000e+02  -1.1651476e+01   1.3266404e+01   6.1565712e+00
   2.5247369e+01  -2.6081474e+01   1.0000000e+02  -1.1037378e+01   1.1919157e+01   6.6124613e+00
   2.5300079e+01  -2.5961839e+01   1.0000000e+02  -1.0655784e+01   1.0684105e+01   7.0676937e+00
   2.5346303e+01  -2.5840072e+01   1.0000000e+02  -1.0579064e+01   9.6664055e+00   7.4524986e+00
   2.5385955e+01  -2.5716454e+01   1.0000000e+02  -1.0835773e+01   8.9624871e+00   7.6507859e+00
   2.5418965e+01  -2.5591271e+01   1.0000000e+02  -1.1382351e+01   8.6477209e+00   7.5118245e+00
   2.5445279e+01  -2.5464810e+01   1.0000000e+02  -1.2072431e+01   8.7663787e+00   6.8942421e+00
   2.5464856e+01  -2.5337360e+01   1.0000000e+02  -1.2665867e+01   9.3155886e+00   5.7470520e+00
   2.5477675e+01  -2.5209213e+01   1.0000000e+02  -1.2912525e+01   1.0227128e+01   4.1730351e+00
   2.5483728e+01  -2.5080658e+01   1.0000000e+02  -1.2672329e+01   1.1365454e+01   2.4059930e+00
   2.5483022e+01  -2.4951989e+01   1.0000000e+02  -1.1984266e+01   1.2551042e+01   7.0554035e-01
   2.5475580e+01  -2.4823495e+01   1.0000000e+02  -1.1040235e+01   1.3597542e+01  -7.5853002e-01
   2.5461440e+01  -2.4695467e+01   1.0000000e+02  -1.0091148e+01   1.4343934e+01  -1.9676669e+00
   2.5440654e+01  -2.4568191e+01   1.0000000e+02  -9.3392084e+00   1.4675185e+01  -3.0453926e+00
   2.5413289e+01  -2.4441952e+01   1.0000000e+02  -8.8606411e+00   1.4532638e+01  -4.1930369e+00
   2.5379424e+01  -2.4317033e+01   1.0000000e+02  -8.5833508e+00   1.3913096e+01  -5.6019949e+00
   2.5339155e+01  -2.4193711e+01   1.0000000e+02  -8.3181867e+00   1.2854914e+01  -7.3760629e+00
   2.5292589e+01  -2.4072260e+01   1.0000000e+02  -7.8237944e+00   1.1418978e+01  -9.4827537e+00
   2.5239846e+01  -2.3952950e+01   1.0000000e+02  -6.8897926e+00   9.6771311e+00  -1.1739995e+01
   2.5181059e+01  -2.3836043e+01   1.0000000e+02  -5.4238826e+00   7.7120438e+00  -1.3853154e+01
   2.5116373e+01  -2.3721796e+01   1.0000000e+02  -3.5054883e+00   5.6203464e+00  -1.5510182e+01
   2.5045945e+01  -2.3610462e+01   1.0000000e+02  -1.3620167e+00   3.5076484e+00  -1.6499853e+01
   2.4969943e+01  -2.3502284e+01   1.0000000e+02   7.3003415e-01   1.4707993e+00  -1.6782292e+01
   2.4888547e+01  -2.3397498e+01   1.0000000e+02   2.5546704e+00  -4.2318108e-01  -1.6467615e+01
   2.4801945e+01  -2.3296334e+01   1.0000000e+02   4.0079314e+00  -2.1449307e+00  -1.5733122e+01
   2.4710338e+01  -2.3199011e+01   1.0000000e+02   5.0819111e+00  -3.6927484e+00  -1.4748924e+01
   2.4613934e+01  -2.3105742e+01   1.0000000e+02   5.8231844e+00  -5.0779539e+00  -1.3648603e+01
   2.4512952e+01  -2.3016728e+01   1.0000000e+02   6.3019009e+00  -6.3188708e+00  -1.2529557e+01
   2.4407618e+01  -2.2932162e+01   1.0000000e+02   6.5953761e+00  -7.4431491e+00  -1.1455039e+01
   2.4298167e+01  -2.2852228e+01   1.0000000e+02   6.7739600e+00  -8.4897847e+00  -1.0449061e+01
   2.4184843e+01  -2.2777097e+01   1.0000000e+02   6.8841237e+00  -9.5044343e+00  -9.4925685e+00
   2.4067894e+01  -2.2706932e+01   1.0000000e+02   6.9349480e+00  -1.0528028e+01  -8.5301216e+00
   2.3947577e+01  -2.2641884e+01   1.0000000e+02   6.8968414e+00  -1.1583098e+01  -7.4892291e+00
   2.3824154e+01  -2.2582093e+01   1.0000000e+02   6.7172038e+00  -1.2665218e+01  -6.3072786e+00
   2.3697894e+01  -2.2527687e+01   1.0000000e+02   6.3490651e+00  -1.3746078e+01  -4.9537644e+00
   2.3569070e+01  -2.2478782e+01   1.0000000e+02   5.7802307e+00  -1.4785340e+01  -3.4338142e+00
   2.3437960e+01  -2.2435485e+01   1.0000000e+02   5.0481242e+00  -1.5736988e+01  -1.7730965e+00
   2.3304846e+01  -2.2397887e+01   1.0000000e+02   4.2326432e+00  -1.6543738e+01  -6.3716285e-03
   2.3170014e+01  -2.2366070e+01   1.0000000e+02   3.4330750e+00  -1.7138983e+01   1.8113628e+00
   2.3033751e+01  -2.2340100e+01   1.0000000e+02   2.7419214e+00  -1.7476469e+01   3.5893891e+00
   2.2896351e+01  -2.2320035e+01   1.0000000e+02   2.2251524e+00  -1.7570511e+01   5.2143519e+00
   2.2758106e+01  -2.2305916e+01   1.0000000e+02   1.9122987e+00  -1.7510269e+01   6.5910387e+00
   2.2619311e+01  -2.2297773e+01   1.0000000e+02   1.7972769e+00  -1.7439577e+01   7.6801792e+00
   2.2480261e+01  -2.2295625e+01   1.0000000e+02   1.8458489e+00  -1.7523365e+01   8.5169080e+00
   2.2341254e+01  -2.2299476e+01   1.0000000e+02   2.0052319e+00  -1.7914666e+01   9.2178179e+00
   2.2202585e+01  -2.2309317e+01   1.0000000e+02   2.2153393e+00  -1.8715440e+01   9.9800619e+00
   2.2064549e+01  -2.2325128e+01   1.0000000e+02   2.4236525e+00  -1.9931148e+01   1.1056136e+01
   2.1927442e+01  -2.2346874e+01   1.0000000e+02   2.6035891e+00  -2.1442612e+01   1.2696146e+01
   2.1791557e+01  -2.2374510e+01   1.0000000e+02   2.7716876e+00  -2.3015835e+01   1.5077600e+01
   2.1657183e+01  -2.2407975e+01   1.0000000e+02   2.9959555e+00  -2.4344664e+01   1.8247476e+01
   2.1524609e+01  -2.2447199e+01   1.0000000e+02   3.3890130e+00  -2.5114226e+01   2.2084454e+01
   2.1394119e+01  -2.2492098e+01   1.0000000e+02   4.0816523e+00  -2.5082542e+01   2.6290863e+01
   2.1265995e+01  -2.2542575e+01   1.0000000e+02   5.1811449e+00  -2.4164938e+01   3.0438093e+01
   2.1140513e+01  -2.2598522e+01   1.0000000e+02   6.7310729e+00  -2.2477824e+01   3.4073355e+01
   2.1017944e+01  -2.2659819e+01   1.0000000e+02   8.6945304e+00  -2.0303978e+01   3.6846994e+01
   2.0898557e+01  -2.2726334e+01   1.0000000e+02   1.0970915e+01  -1.7989990e+01   3.8594672e+01
   2.0782611e+01  -2.2797925e+01   1.0000000e+02   1.3435227e+01  -1.5830732e+01   3.9335311e+01
   2.0670361e+01  -2.2874436e+01   1.0000000e+02   1.5974556e+01  -1.3998798e+01   3.9198607e+01
   2.0562055e+01  -2.2955703e+01   1.0000000e+02   1.8502587e+01  -1.2540906e+01   3.8333788e+01
   2.0457932e+01  -2.3041550e+01   1.0000000e+02   2.0950738e+01  -1.1423861e+01   3.6848500e+01
   2.0358227e+01  -2.3131792e+01   1.0000000e+02   2.3250792e+01  -1.0594834e+01   3.4795924e+01
   2.0263163e+01  -2.3226233e+01   1.0000000e+02   2.5322418e+01  -1.0026160e+01   3.2198828e+01
   2.0172956e+01  -2.3324668e+01   1.0000000e+02   2.7070111e+01  -9.7315903e+00   2.9086838e+01
   2.0087812e+01  -2.3426883e+01   1.0000000e+02   2.8386187e+01  -9.7548535e+00   2.5529475e+01
   2.0007928e+01  -2.3532655e+01   1.0000000e+02   2.9159703e+01  -1.0140880e+01   2.1658435e+01
   1.9933490e+01  -2.3641754e+01   1.0000000e+02   2.9298336e+01  -1.0902279e+01   1.7676229e+01
   1.9864676e+01  -2.3753940e+01   1.0000000e+02   2.8768026e+01  -1.1993387e+01   1.3842055e+01
   1.9801649e+01  -2.3868967e+01   1.0000000e+02   2.7637651e+01  -1.3303413e+01   1.0423190e+01
   1.9744563e+01  -2.3986583e+01   1.0000000e+02   2.6098131e+01  -1.4675214e+01   7.6168048e+00
   1.9693560e+01  -2.4106528e+01   1.0000000e+02   2.4428375e+01  -1.5944355e+01   5.4732096e+00
   1.9648769e+01  -2.4228537e+01   1.0000000e+02   2.2910242e+01  -1.6981420e+01   3.8632353e+00
   1.9610308e+01  -2.4352341e+01   1.0000000e+02   2.1729176e+01  -1.7718689e+01   2.5147503e+00
   1.9578279e+01  -2.4477663e+01   1.0000000e+02   2.0908104e+01  -1.8152914e+01   1.1069639e+00
   1.9552774e+01  -2.4604225e+01   1.0000000e+02   2.0303964e+01  -1.8328352e+01  -6.1666843e-01
   1.9533868e+01  -2.4731743e+01   1.0000000e+02   1.9666980e+01  -1.8309203e+01  -2.7590232e+00
   1.9521625e+01  -2.4859933e+01   1.0000000e+02   1.8739034e+01  -1.8151641e+01  -5.2365109e+00
   1.9516092e+01  -2.4988506e+01   1.0000000e+02   1.7352685e+01  -1.7885809e+01  -7.8153969e+00
   1.9517303e+01  -2.5117173e+01   1.0000000e+02   1.5487363e+01  -1.7516254e+01  -1.0204484e+01
   1.9525276e+01  -2.5245641e+01   1.0000000e+02   1.3255823e+01  -1.7040585e+01  -1.2158967e+01
   1.9540015e+01  -2.5373620e+01   1.0000000e+02   1.0835008e+01  -1.6475541e+01  -1.3541454e+01
   1.9582278e+01  -2.6044625e+01   1.0000000e+02  -3.4123453e-01  -1.5709158e+01  -1.1586940e+01
   1.9636798e+01  -2.6163869e+01   1.0000000e+02  -1.4784286e+00  -1.6204155e+01  -1.0592836e+01
   1.9697417e+01  -2.6280740e+01   1.0000000e+02  -2.1767185e+00  -1.7032861e+01  -9.8209424e+00
   1.9764025e+01  -2.6394989e+01   1.0000000e+02  -2.5476116e+00  -1.8069620e+01  -9.5236472e+00
   1.9836497e+01  -2.6506371e+01   1.0000000e+02  -2.7841350e+00  -1.9127939e+01  -9.8549764e+00
   1.9914695e+01  -2.6614647e+01   1.0000000e+02  -3.1101790e+00  -1.9994428e+01  -1.0818795e+01
   1.9998467e+01  -2.6719585e+01   1.0000000e+02  -3.7079197e+00  -2.0472173e+01  -1.2260784e+01
   2.0087649e+01  -2.6820956e+01   1.0000000e+02  -4.6536180e+00  -2.0425934e+01  -1.3915561e+01
   2.0182062e+01  -2.6918543e+01   1.0000000e+02  -5.8935046e+00  -1.9815930e+01  -1.5492581e+01
   2.0281515e+01  -2.7012132e+01   1.0000000e+02  -7.2686395e+00  -1.8706742e+01  -1.6765407e+01
   2.0385805e+01  -2.7101520e+01   1.0000000e+02  -8.5730687e+00  -1.7243960e+01  -1.7632383e+01
   2.0494715e+01  -2.7186511e+01   1.0000000e+02  -9.6198220e+00  -1.5601582e+01  -1.8131087e+01
   2.0608019e+01  -2.7266919e+01   1.0000000e+02  -1.0292034e+01  -1.3918259e+01  -1.8402149e+01
   2.0725477e+01  -2.7342569e+01   1.0000000e+02  -1.0563496e+01  -1.2250941e+01  -1.8616519e+01
   2.0846840e+01  -2.7413292e+01   1.0000000e+02  -1.0487092e+01  -1.0566738e+01  -1.8897892e+01
   2.0971849e+01  -2.7478933e+01   1.0000000e+02  -1.0163117e+01  -8.7745953e+00  -1.9271613e+01
   2.1100234e+01  -2.7539347e+01   1.0000000e+02  -9.7042487e+00  -6.7805580e+00  -1.9657027e+01
   2.1231716e+01  -2.7594400e+01   1.0000000e+02  -9.2088561e+00  -4.5422081e+00  -1.9900580e+01
   2.1366011e+01  -2.7643970e+01   1.0000000e+02  -8.7459148e+00  -2.1003742e+00  -1.9834686e+01
   2.1502822e+01  -2.7687946e+01   1.0000000e+02  -8.3504414e+00   4.2608128e-01  -1.9342546e+01
   2.1641851e+01  -2.7726231e+01   1.0000000e+02  -8.0290676e+00   2.8859368e+00  -1.8404179e+01
   2.1782789e+01  -2.7758739e+01   1.0000000e+02  -7.7749983e+00   5.1616392e+00  -1.7097862e+01
   2.1925324e+01  -2.7785398e+01   1.0000000e+02  -7.5865229e+00   7.2162650e+00  -1.5552957e+01
   2.2069141e+01  -2.7806148e+01   1.0000000e+02  -7.4813960e+00   9.0920895e+00  -1.3884759e+01
   2.2213918e+01  -2.7820943e+01   1.0000000e+02  -7.5021539e+00   1.0868528e+01  -1.2148644e+01
   2.2359334e+01  -2.7829750e+01   1.0000000e+02  -7.7105753e+00   1.2606296e+01  -1.0327633e+01
   2.2505064e+01  -2.7832548e+01   1.0000000e+02  -8.1733515e+00   1.4297976e+01  -8.3532669e+00
   2.2650783e+01  -2.7829332e+01   1.0000000e+02  -8.9466445e+00   1.5843133e+01  -6.1599903e+00
   2.2796165e+01  -2.7820109e+01   1.0000000e+02  -1.0065187e+01   1.7072442e+01  -3.7613594e+00
   2.2940886e+01  -2.7804899e+01   1.0000000e+02  -1.1528706e+01   1.7830942e+01  -1.3013772e+00
   2.3084624e+01  -2.7783737e+01   1.0000000e+02  -1.3277119e+01   1.8078006e+01   9.7586097e-01
   2.3227059e+01  -2.7756669e+01   1.0000000e+02  -1.5170712e+01   1.7927207e+01   2.8366607e+00
   2.3367874e+01  -2.7723757e+01   1.0000000e+02  -1.7011193e+01   1.7589563e+01   4.1725263e+00
   2.3506758e+01  -2.7685074e+01   1.0000000e+02  -1.8611629e+01   1.7258292e+01   5.0318555e+00
   2.3643404e+01  -2.7640706e+01   1.0000000e+02  -1.9864772e+01   1.7023343e+01   5.5419048e+00
   2.3777513e+01  -2.7590751e+01   1.0000000e+02  -2.0752377e+01   1.6885115e+01   5.7979329e+00
   2.3908790e+01  -2.7535322e+01   1.0000000e+02  -2.1302238e+01   1.6832647e+01   5.8321397e+00
   2.4036949e+01  -2.7474540e+01   1.0000000e+02  -2.1546598e+01   1.6885723e+01   5.6680930e+00
   2.4161713e+01  -2.7408541e+01   1.0000000e+02  -2.1508641e+01   1.7070768e+01   5.3709319e+00
   2.4282813e+01  -2.7337470e+01   1.0000000e+02  -2.1205193e+01   1.7384237e+01   5.0444455e+00
   2.4399990e+01  -2.7261485e+01   1.0000000e+02  -2.0652472e+01   1.7783700e+01   4.8050637e+00
   2.4512996e+01  -2.7180752e+01   1.0000000e+02  -1.9878381e+01   1.8193592e+01   4.7635080e+00
   2.4621593e+01  -2.7095449e+01   1.0000000e+02  -1.8941700e+01   1.8506423e+01   5.0012921e+00
   2.4725553e+01  -2.7005763e+01   1.0000000e+02  -1.7937890e+01   1.8595417e+01   5.5264284e+00
   2.4824663e+01  -2.6911889e+01   1.0000000e+02  -1.6972063e+01   1.8357224e+01   6.2428253e+00
   2.4918718e+01  -2.6814033e+01   1.0000000e+02  -1.6113375e+01   1.7759083e+01   6.9792660e+00
   2.5007530e+01  -2.6712406e+01   1.0000000e+02  -1.5367271e+01   1.6846224e+01   7.5683992e+00
   2.5090920e+01  -2.6607230e+01   1.0000000e+02  -1.4686902e+01   1.5704442e+01   7.9180707e+00
   2.5168725e+01  -2.6498730e+01   1.0000000e+02  -1.4012595e+01   1.4414224e+01   8.0312782e+00
   2.5240794e+01  -2.6387141e+01   1.0000000e+02  -1.3310256e+01   1.3032541e+01   7.9771186e+00
   2.5306989e+01  -2.6272702e+01   1.0000000e+02  -1.2588075e+01   1.1605442e+01   7.8463829e+00
   2.5367188e+01  -2.6155658e+01   1.0000000e+02  -1.1892966e+01   1.0189011e+01   7.7182371e+00
   2.5421281e+01  -2.6036259e+01   1.0000000e+02  -1.1296855e+01   8.8586727e+00   7.6403167e+00
   2.5469171e+01  -2.5914758e+01   1.0000000e+02  -1.0878816e+01   7.7038867e+00   7.6157074e+00
   2.5510778e+01  -2.5791412e+01   1.0000000e+02  -1.0703791e+01   6.8163148e+00   7.5944589e+00
   2.5546034e+01  -2.5666483e+01   1.0000000e+02  -1.0794205e+01   6.2784323e+00   7.4743973e+00
   2.5574885e+01  -2.5540232e+01   1.0000000e+02  -1.1095232e+01   6.1521475e+00   7.1258848e+00
   2.5597291e+01  -2.5412926e+01   1.0000000e+02  -1.1458563e+01   6.4632605e+00   6.4517451e+00
   2.5613226e+01  -2.5284830e+01   1.0000000e+02  -1.1682974e+01   7.1833240e+00   5.4564410e+00
   2.5622677e+01  -2.5156210e+01   1.0000000e+02  -1.1608724e+01   8.2210573e+00   4.2657001e+00
   2.5625646e+01  -2.5027335e+01   1.0000000e+02  -1.1204219e+01   9.4340091e+00   3.0684749e+00
   2.5622147e+01  -2.4898470e+01   1.0000000e+02  -1.0584984e+01   1.0655758e+01   2.0182503e+00
   2.5612207e+01  -2.4769883e+01   1.0000000e+02  -9.9583119e+00   1.1723385e+01   1.1537814e+00
   2.5595867e+01  -2.4641837e+01   1.0000000e+02  -9.5270587e+00   1.2497892e+01   3.7534485e-01
   2.5573179e+01  -2.4514596e+01   1.0000000e+02  -9.3970223e+00   1.2879562e+01  -5.1611558e-01
   2.5544210e+01  -2.4388419e+01   1.0000000e+02  -9.5282833e+00   1.2818956e+01  -1.7358461e+00
   2.5509036e+01  -2.4263564e+01   1.0000000e+02  -9.7482460e+00   1.2317832e+01  -3.4292513e+00
   2.5467747e+01  -2.4140284e+01   1.0000000e+02  -9.8076798e+00   1.1415789e+01  -5.6171874e+00
   2.5420444e+01  -2.4018831e+01   1.0000000e+02  -9.4509760e+00   1.0171054e+01  -8.1750675e+00
   2.5367238e+01  -2.3899449e+01   1.0000000e+02  -8.4937856e+00   8.6497463e+00  -1.0840863e+01
   2.5308254e+01  -2.3782379e+01   1.0000000e+02  -6.8994505e+00   6.9272142e+00  -1.3269329e+01
   2.5243625e+01  -2.3667857e+01   1.0000000e+02  -4.8123265e+00   5.0905968e+00  -1.5138548e+01
   2.5173494e+01  -2.3556112e+01   1.0000000e+02  -2.5094879e+00   3.2323103e+00  -1.6261639e+01
   2.5098015e+01  -2.3447369e+01   1.0000000e+02  -2.9023760e-01   1.4336930e+00  -1.6635146e+01
   2.5017352e+01  -2.3341845e+01   1.0000000e+02   1.6273230e+00  -2.5247859e-01  -1.6398681e+01
   2.4931676e+01  -2.3239751e+01   1.0000000e+02   3.1459300e+00  -1.8070679e+00  -1.5746183e+01
   2.4841169e+01  -2.3141288e+01   1.0000000e+02   4.2664756e+00  -3.2334291e+00  -1.4853131e+01
   2.4746020e+01  -2.3046654e+01   1.0000000e+02   5.0443165e+00  -4.5414830e+00  -1.3849687e+01
   2.4646427e+01  -2.2956035e+01   1.0000000e+02   5.5572352e+00  -5.7404414e+00  -1.2824093e+01
   2.4542595e+01  -2.2869611e+01   1.0000000e+02   5.8881607e+00  -6.8410083e+00  -1.1829789e+01
   2.4434735e+01  -2.2787553e+01   1.0000000e+02   6.1113831e+00  -7.8594675e+00  -1.0886513e+01
   2.4323068e+01  -2.2710022e+01   1.0000000e+02   6.2763890e+00  -8.8177554e+00  -9.9813626e+00
   2.4207817e+01  -2.2637172e+01   1.0000000e+02   6.3939963e+00  -9.7395819e+00  -9.0765449e+00
   2.4089216e+01  -2.2569145e+01   1.0000000e+02   6.4330974e+00  -1.0644865e+01  -8.1245202e+00
   2.3967500e+01  -2.2506075e+01   1.0000000e+02   6.3334083e+00  -1.1545233e+01  -7.0860847e+00
   2.3842912e+01  -2.2448087e+01   1.0000000e+02   6.0324551e+00  -1.2443251e+01  -5.9445793e+00
   2.3715699e+01  -2.2395293e+01   1.0000000e+02   5.4975098e+00  -1.3336687e+01  -4.7079209e+00
   2.3586111e+01  -2.2347797e+01   1.0000000e+02   4.7480017e+00  -1.4222335e+01  -3.3933996e+00
   2.3454405e+01  -2.2305692e+01   1.0000000e+02   3.8554101e+00  -1.5088073e+01  -2.0047584e+00
   2.3320837e+01  -2.2269060e+01   1.0000000e+02   2.9207106e+00  -1.5894777e+01  -5.2857489e-01
   2.3185671e+01  -2.2237973e+01   1.0000000e+02   2.0456747e+00  -1.6573191e+01   1.0366535e+00
   2.3049170e+01  -2.2212492e+01   1.0000000e+02   1.3128433e+00  -1.7054974e+01   2.6469800e+00
   2.2911600e+01  -2.2192666e+01   1.0000000e+02   7.7537665e-01  -1.7318991e+01   4.2128071e+00
   2.2773229e+01  -2.2178534e+01   1.0000000e+02   4.5298381e-01  -1.7416219e+01   5.6352361e+00
   2.2634327e+01  -2.2170124e+01   1.0000000e+02   3.3311201e-01  -1.7459052e+01   6.8499173e+00
   2.2495164e+01  -2.2167452e+01   1.0000000e+02   3.7630046e-01  -1.7591020e+01   7.8549408e+00
   2.2356011e+01  -2.2170523e+01   1.0000000e+02   5.2347841e-01  -1.7954186e+01   8.7236555e+00
   2.2217137e+01  -2.2179331e+01   1.0000000e+02   7.0513029e-01  -1.8652810e+01   9.6074901e+00
   2.2078813e+01  -2.2193860e+01   1.0000000e+02   8.5466837e-01  -1.9711938e+01   1.0718284e+01
   2.1941309e+01  -2.2214080e+01   1.0000000e+02   9.2648760e-01  -2.1049017e+01   1.2282461e+01
   2.1804892e+01  -2.2239952e+01   1.0000000e+02   9.1446167e-01  -2.2476762e+01   1.4482111e+01
   2.1669828e+01  -2.2271426e+01   1.0000000e+02   8.6358222e-01  -2.3733776e+01   1.7403712e+01
   2.1536382e+01  -2.2308441e+01   1.0000000e+02   8.6895055e-01  -2.4531940e+01   2.1000163e+01
   2.1404814e+01  -2.2350923e+01   1.0000000e+02   1.0586252e+00  -2.4620832e+01   2.5069903e+01
   2.1275383e+01  -2.2398790e+01   1.0000000e+02   1.5614561e+00  -2.3865250e+01   2.9273251e+01
   2.1148344e+01  -2.2451949e+01   1.0000000e+02   2.4691856e+00  -2.2304496e+01   3.3204696e+01
   2.1023948e+01  -2.2510294e+01   1.0000000e+02   3.8096823e+00  -2.0151612e+01   3.6502173e+01
   2.0902441e+01  -2.2573713e+01   1.0000000e+02   5.5449809e+00  -1.7722877e+01   3.8940733e+01
   2.0784065e+01  -2.2642079e+01   1.0000000e+02   7.5936210e+00  -1.5332711e+01   4.0464047e+01
   2.0669056e+01  -2.2715259e+01   1.0000000e+02   9.8639978e+00  -1.3206502e+01   4.1146065e+01
   2.0557645e+01  -2.2793110e+01   1.0000000e+02   1.2277746e+01  -1.1446651e+01   4.1112557e+01
   2.0450059e+01  -2.2875477e+01   1.0000000e+02   1.4771732e+01  -1.0053860e+01   4.0468105e+01
   2.0346514e+01  -2.2962198e+01   1.0000000e+02   1.7283100e+01  -8.9796589e+00   3.9261517e+01
   2.0247223e+01  -2.3053101e+01   1.0000000e+02   1.9731977e+01  -8.1796239e+00   3.7496006e+01
   2.0152390e+01  -2.3148008e+01   1.0000000e+02   2.2015458e+01  -7.6446070e+00   3.5166899e+01
   2.0062213e+01  -2.3246729e+01   1.0000000e+02   2.4014762e+01  -7.4030553e+00   3.2301159e+01
   1.9976880e+01  -2.3349068e+01   1.0000000e+02   2.5608830e+01  -7.5011405e+00   2.8980161e+01
   1.9896571e+01  -2.3454823e+01   1.0000000e+02   2.6687088e+01  -7.9743751e+00   2.5344397e+01
   1.9821459e+01  -2.3563781e+01   1.0000000e+02   2.7164437e+01  -8.8222851e+00   2.1587502e+01
   1.9751705e+01  -2.3675726e+01   1.0000000e+02   2.7006296e+01  -9.9931176e+00   1.7940226e+01
   1.9687464e+01  -2.3790433e+01   1.0000000e+02   2.6260885e+01  -1.1382786e+01   1.4637321e+01
   1.9628877e+01  -2.3907671e+01   1.0000000e+02   2.5079559e+01  -1.2850962e+01   1.1862954e+01
   1.9576078e+01  -2.4027205e+01   1.0000000e+02   2.3701250e+01  -1.4251653e+01   9.6891163e+00
   1.9529189e+01  -2.4148793e+01   1.0000000e+02   2.2392378e+01  -1.5467099e+01   8.0369314e+00
   1.9488322e+01  -2.4272190e+01   1.0000000e+02   2.1361251e+01  -1.6431540e+01   6.6868576e+00
   1.9453576e+01  -2.4397145e+01   1.0000000e+02   2.0684032e+01  -1.7136513e+01   5.3431457e+00
   1.9425041e+01  -2.4523405e+01   1.0000000e+02   2.0276656e+01  -1.7618710e+01   3.7309137e+00
   1.9402792e+01  -2.4650711e+01   1.0000000e+02   1.9926590e+01  -1.7936205e+01   1.6900174e+00
   1.9386895e+01  -2.4778802e+01   1.0000000e+02   1.9373259e+01  -1.8140936e+01  -7.7135936e-01
   1.9377401e+01  -2.4907418e+01   1.0000000e+02   1.8405162e+01  -1.8256416e+01  -3.4849592e+00
   1.9374351e+01  -2.5036291e+01   1.0000000e+02   1.6932486e+01  -1.8270902e+01  -6.1899895e+00
   1.9377770e+01  -2.5165157e+01   1.0000000e+02   1.5002006e+01  -1.8150663e+01  -8.6288400e+00
   1.9387672e+01  -2.5293749e+01   1.0000000e+02   1.2750781e+01  -1.7866699e+01  -1.0621717e+01
   1.9404057e+01  -2.5421799e+01   1.0000000e+02   1.0333271e+01  -1.7421102e+01  -1.2083752e+01
   1.9426911e+01  -2.5549041e+01   1.0000000e+02   7.8740303e+00  -1.6862303e+01  -1.2991220e+01
   1.9456209e+01  -2.5675208e+01   1.0000000e+02   5.4707457e+00  -1.6285573e+01  -1.3343609e+01
   1.9491908e+01  -2.5800036e+01   1.0000000e+02   3.2235427e+00  -1.5818510e+01  -1.3162450e+01
   1.9533954e+01  -2.5923262e+01   1.0000000e+02   1.2487305e+00  -1.5592894e+01  -1.2523624e+01
   1.9714474e+01  -2.6573850e+01   1.0000000e+02  -3.8003982e+00  -1.9053370e+01  -7.4702462e+00
   1.9792084e+01  -2.6681696e+01   1.0000000e+02  -3.9819213e+00  -1.9910877e+01  -8.2009509e+00
   1.9874991e+01  -2.6786394e+01   1.0000000e+02  -4.3793187e+00  -2.0445449e+01  -9.4250705e+00
   1.9963048e+01  -2.6887738e+01   1.0000000e+02  -5.0718648e+00  -2.0520402e+01  -1.0913960e+01
   2.0056096e+01  -2.6985528e+01   1.0000000e+02  -6.0313929e+00  -2.0085076e+01  -1.2414829e+01
   2.0153966e+01  -2.7079572e+01   1.0000000e+02  -7.1450268e+00  -1.9185396e+01  -1.3722255e+01
   2.0256476e+01  -2.7169685e+01   1.0000000e+02  -8.2573866e+00  -1.7947550e+01  -1.4727095e+01
   2.0363436e+01  -2.7255686e+01   1.0000000e+02  -9.2162740e+00  -1.6536161e+01  -1.5435001e+01
   2.0474643e+01  -2.7337406e+01   1.0000000e+02  -9.9100516e+00  -1.5097310e+01  -1.5949113e+01
   2.0589885e+01  -2.7414681e+01   1.0000000e+02  -1.0287005e+01  -1.3707501e+01  -1.6420298e+01
   2.0708943e+01  -2.7487358e+01   1.0000000e+02  -1.0353699e+01  -1.2350256e+01  -1.6982228e+01
   2.0831584e+01  -2.7555290e+01   1.0000000e+02  -1.0159043e+01  -1.0930118e+01  -1.7696353e+01
   2.0957571e+01  -2.7618341e+01   1.0000000e+02  -9.7745685e+00  -9.3174896e+00  -1.8525160e+01
   2.1086657e+01  -2.7676384e+01   1.0000000e+02  -9.2774775e+00  -7.4069591e+00  -1.9339698e+01
   2.1218587e+01  -2.7729303e+01   1.0000000e+02  -8.7372366e+00  -5.1674859e+00  -1.9956879e+01
   2.1353099e+01  -2.7776990e+01   1.0000000e+02  -8.2043799e+00  -2.6662411e+00  -2.0196434e+01
   2.1489926e+01  -2.7819350e+01   1.0000000e+02  -7.7034288e+00  -5.3128058e-02  -1.9943150e+01
   2.1628795e+01  -2.7856296e+01   1.0000000e+02  -7.2357301e+00   2.4956022e+00  -1.9189966e+01
   2.1769425e+01  -2.7887753e+01   1.0000000e+02  -6.7942733e+00   4.8511843e+00  -1.8034232e+01
   2.1911535e+01  -2.7913657e+01   1.0000000e+02  -6.3839843e+00   6.9808197e+00  -1.6623926e+01
   2.2054838e+01  -2.7933957e+01   1.0000000e+02  -6.0378464e+00   8.9428727e+00  -1.5085973e+01
   2.2199043e+01  -2.7948610e+01   1.0000000e+02  -5.8218087e+00   1.0838150e+01  -1.3474104e+01
   2.2343859e+01  -2.7957588e+01   1.0000000e+02  -5.8239354e+00   1.2744833e+01  -1.1753969e+01
   2.2488992e+01  -2.7960870e+01   1.0000000e+02  -6.1297104e+00   1.4662596e+01  -9.8272742e+00
   2.2634147e+01  -2.7958452e+01   1.0000000e+02  -6.7961366e+00   1.6487786e+01  -7.5901830e+00
   2.2779029e+01  -2.7950337e+01   1.0000000e+02  -7.8412091e+00   1.8036699e+01  -5.0081301e+00
   2.2923346e+01  -2.7936543e+01   1.0000000e+02  -9.2470396e+00   1.9116383e+01  -2.1716589e+00
   2.3066804e+01  -2.7917097e+01   1.0000000e+02  -1.0956317e+01   1.9611680e+01   7.0434960e-01
   2.3209114e+01  -2.7892039e+01   1.0000000e+02  -1.2854784e+01   1.9543422e+01   3.3462528e+00
   2.3349987e+01  -2.7861420e+01   1.0000000e+02  -1.4768582e+01   1.9067785e+01   5.5247320e+00
   2.3489141e+01  -2.7825302e+01   1.0000000e+02  -1.6507364e+01   1.8409405e+01   7.1443530e+00
   2.3626295e+01  -2.7783759e+01   1.0000000e+02  -1.7935171e+01   1.7757857e+01   8.2530743e+00
   2.3761176e+01  -2.7736873e+01   1.0000000e+02  -1.9010651e+01   1.7208496e+01   8.9585029e+00
   2.3893514e+01  -2.7684741e+01   1.0000000e+02  -1.9764691e+01   1.6793626e+01   9.3428928e+00
   2.4023048e+01  -2.7627467e+01   1.0000000e+02  -2.0248613e+01   1.6538841e+01   9.4600200e+00
   2.4149521e+01  -2.7565168e+01   1.0000000e+02  -2.0500077e+01   1.6469101e+01   9.3769906e+00
   2.4272685e+01  -2.7497967e+01   1.0000000e+02  -2.0536689e+01   1.6579728e+01   9.1871930e+00
   2.4392301e+01  -2.7426001e+01   1.0000000e+02  -2.0361096e+01   1.6823848e+01   8.9904030e+00
   2.4508136e+01  -2.7349414e+01   1.0000000e+02  -1.9970052e+01   1.7124772e+01   8.8766145e+00
   2.4619969e+01  -2.7268357e+01   1.0000000e+02  -1.9371768e+01   1.7387320e+01   8.9230980e+00
   2.4727586e+01  -2.7182994e+01   1.0000000e+02  -1.8608382e+01   1.7500696e+01   9.1782366e+00
   2.4830783e+01  -2.7093494e+01   1.0000000e+02  -1.7762145e+01   1.7356086e+01   9.6252897e+00
   2.4929369e+01  -2.7000034e+01   1.0000000e+02  -1.6930732e+01   1.6886822e+01   1.0164913e+01
   2.5023159e+01  -2.6902800e+01   1.0000000e+02  -1.6187812e+01   1.6099257e+01   1.0647362e+01
   2.5111984e+01  -2.6801982e+01   1.0000000e+02  -1.5557708e+01   1.5062678e+01   1.0934496e+01
   2.5195681e+01  -2.6697780e+01   1.0000000e+02  -1.5017160e+01   1.3867535e+01   1.0947500e+01
   2.5274103e+01  -2.6590398e+01   1.0000000e+02  -1.4516603e+01   1.2585833e+01   1.0679302e+01
   2.5347112e+01  -2.6480045e+01   1.0000000e+02  -1.4005337e+01   1.1258657e+01   1.0179032e+01
   2.5414581e+01  -2.6366936e+01   1.0000000e+02  -1.3449385e+01   9.9093170e+00   9.5289549e+00
   2.5476398e+01  -2.6251292e+01   1.0000000e+02  -1.2841652e+01   8.5640441e+00   8.8252929e+00
   2.5532459e+01  -2.6133336e+01   1.0000000e+02  -1.2206740e+01   7.2651004e+00   8.1603291e+00
   2.5582675e+01  -2.6013296e+01   1.0000000e+02  -1.1598546e+01   6.0730963e+00   7.6021536e+00
   2.5626968e+01  -2.5891402e+01   1.0000000e+02  -1.1087952e+01   5.0626793e+00   7.1756792e+00
   2.5665272e+01  -2.5767889e+01   1.0000000e+02  -1.0740846e+01   4.3139436e+00   6.8515916e+00
   2.5697533e+01  -2.5642992e+01   1.0000000e+02  -1.0586779e+01   3.9004100e+00   6.5498200e+00
   2.5723708e+01  -2.5516949e+01   1.0000000e+02  -1.0586740e+01   3.8740251e+00   6.1683367e+00
   2.5743768e+01  -2.5390000e+01   1.0000000e+02  -1.0627430e+01   4.2486796e+00   5.6380689e+00
   2.5757695e+01  -2.5262384e+01   1.0000000e+02  -1.0567121e+01   4.9882115e+00   4.9729820e+00
   2.5765480e+01  -2.5134343e+01   1.0000000e+02  -1.0315651e+01   6.0068671e+00   4.2709479e+00
   2.5767130e+01  -2.5006116e+01   1.0000000e+02  -9.8948302e+00   7.1836223e+00   3.6564528e+00
   2.5762661e+01  -2.4877945e+01   1.0000000e+02  -9.4404185e+00   8.3821203e+00   3.2001074e+00
   2.5752099e+01  -2.4750069e+01   1.0000000e+02  -9.1448812e+00   9.4674895e+00   2.8581625e+00
   2.5735483e+01  -2.4622726e+01   1.0000000e+02  -9.1665771e+00   1.0319381e+01   2.4627401e+00
   2.5712863e+01  -2.4496152e+01   1.0000000e+02  -9.5462935e+00   1.0844736e+01   1.7736041e+00
   2.5684298e+01  -2.4370582e+01   1.0000000e+02  -1.0173863e+01   1.0989598e+01   5.7078014e-01
   2.5649858e+01  -2.4246248e+01   1.0000000e+02  -1.0820056e+01   1.0743959e+01  -1.2609601e+00
   2.5609623e+01  -2.4123378e+01   1.0000000e+02  -1.1205422e+01   1.0133904e+01  -3.6935135e+00
   2.5563683e+01  -2.4002198e+01   1.0000000e+02  -1.1069086e+01   9.2048117e+00  -6.5554409e+00
   2.5512139e+01  -2.3882929e+01   1.0000000e+02  -1.0234272e+01   8.0095102e+00  -9.5510210e+00
   2.5455099e+01  -2.3765790e+01   1.0000000e+02  -8.6742465e+00   6.6089788e+00  -1.2312548e+01
   2.5392680e+01  -2.3650995e+01   1.0000000e+02  -6.5434607e+00   5.0760773e+00  -1.4500643e+01
   2.5325011e+01  -2.3538751e+01   1.0000000e+02  -4.1322420e+00   3.4906959e+00  -1.5912404e+01
   2.5252227e+01  -2.3429262e+01   1.0000000e+02  -1.7599978e+00   1.9259717e+00  -1.6530901e+01
   2.5174470e+01  -2.3322726e+01   1.0000000e+02   3.2876376e-01   4.3294153e-01  -1.6491001e+01
   2.5091893e+01  -2.3219335e+01   1.0000000e+02   2.0118503e+00  -9.6703036e-01  -1.5995218e+01
   2.5004655e+01  -2.3119276e+01   1.0000000e+02   3.2758789e+00  -2.2765629e+00  -1.5235300e+01
   2.4912921e+01  -2.3022729e+01   1.0000000e+02   4.1740025e+00  -3.5073947e+00  -1.4353306e+01
   2.4816865e+01  -2.2929866e+01   1.0000000e+02   4.7878236e+00  -4.6681289e+00  -1.3439313e+01
   2.4716668e+01  -2.2840855e+01   1.0000000e+02   5.2051281e+00  -5.7617920e+00  -1.2542892e+01
   2.4612515e+01  -2.2755854e+01   1.0000000e+02   5.5069244e+00  -6.7893533e+00  -1.1681337e+01
   2.4504600e+01  -2.2675015e+01   1.0000000e+02   5.7545335e+00  -7.7518599e+00  -1.0844273e+01
   2.4393119e+01  -2.2598482e+01   1.0000000e+02   5.9753492e+00  -8.6499391e+00  -1.0001771e+01
   2.4278276e+01  -2.2526391e+01   1.0000000e+02   6.1536672e+00  -9.4838088e+00  -9.1191087e+00
   2.4160281e+01  -2.2458871e+01   1.0000000e+02   6.2344274e+00  -1.0255893e+01  -8.1735254e+00
   2.4039345e+01  -2.2396042e+01   1.0000000e+02   6.1423181e+00  -1.0974999e+01  -7.1656279e+00
   2.3915687e+01  -2.2338014e+01   1.0000000e+02   5.8117178e+00  -1.1660242e+01  -6.1198649e+00
   2.3789528e+01  -2.2284891e+01   1.0000000e+02   5.2175101e+00  -1.2342850e+01  -5.0711419e+00
   2.3661093e+01  -2.2236767e+01   1.0000000e+02   4.3928054e+00  -1.3061151e+01  -4.0390588e+00
   2.3530612e+01  -2.2193726e+01   1.0000000e+02   3.4213413e+00  -1.3842399e+01  -3.0025823e+00
   2.3398314e+01  -2.2155846e+01   1.0000000e+02   2.4074911e+00  -1.4675869e+01  -1.9000867e+00
   2.3264435e+01  -2.2123192e+01   1.0000000e+02   1.4453887e+00  -1.5500095e+01  -6.6601721e-01
   2.3129212e+01  -2.2095823e+01   1.0000000e+02   6.0523313e-01  -1.6224153e+01   7.2104433e-01
   2.2992881e+01  -2.2073786e+01   1.0000000e+02  -6.6364591e-02  -1.6773284e+01   2.2161934e+00
   2.2855685e+01  -2.2057121e+01   1.0000000e+02  -5.4406163e-01  -1.7129438e+01   3.7262841e+00
   2.2717864e+01  -2.2045857e+01   1.0000000e+02  -8.2453111e-01  -1.7343116e+01   5.1529339e+00
   2.2579660e+01  -2.2040014e+01   1.0000000e+02  -9.2770059e-01  -1.7516279e+01   6.4326567e+00
   2.2441316e+01  -2.2039602e+01   1.0000000e+02  -8.9576599e-01  -1.7773684e+01   7.5604414e+00
   2.2303075e+01  -2.2044622e+01   1.0000000e+02  -7.8880707e-01  -1.8232665e+01   8.6008135e+00
   2.2165180e+01  -2.2055065e+01   1.0000000e+02  -6.7627224e-01  -1.8968589e+01   9.6869718e+00
   2.2027873e+01  -2.2070913e+01   1.0000000e+02  -6.2345939e-01  -1.9980963e+01   1.0998994e+01
   2.1891396e+01  -2.2092137e+01   1.0000000e+02  -6.7442778e-01  -2.1177270e+01   1.2722072e+01
   2.1755989e+01  -2.2118700e+01   1.0000000e+02  -8.3583491e-01  -2.2382238e+01   1.5000819e+01
   2.1621891e+01  -2.2150556e+01   1.0000000e+02  -1.0674341e+00  -2.3364187e+01   1.7900623e+01
   2.1489339e+01  -2.2187648e+01   1.0000000e+02  -1.2837580e+00  -2.3873299e+01   2.1375498e+01
   2.1358566e+01  -2.2229911e+01   1.0000000e+02  -1.3693018e+00  -2.3697247e+01   2.5248687e+01
   2.1229806e+01  -2.2277270e+01   1.0000000e+02  -1.2053817e+00  -2.2729370e+01   2.9227767e+01
   2.1103288e+01  -2.2329641e+01   1.0000000e+02  -7.0023164e-01  -2.1018497e+01   3.2969103e+01
   2.0979236e+01  -2.2386931e+01   1.0000000e+02   1.8990548e-01  -1.8764765e+01   3.6170608e+01
   2.0857874e+01  -2.2449039e+01   1.0000000e+02   1.4574426e+00  -1.6257099e+01   3.8647401e+01
   2.0739418e+01  -2.2515856e+01   1.0000000e+02   3.0580870e+00  -1.3783331e+01   4.0355716e+01
   2.0624084e+01  -2.2587261e+01   1.0000000e+02   4.9348307e+00  -1.1555398e+01   4.1360524e+01
   2.0512081e+01  -2.2663129e+01   1.0000000e+02   7.0376748e+00  -9.6765340e+00   4.1770004e+01
   2.0403611e+01  -2.2743324e+01   1.0000000e+02   9.3269412e+00  -8.1547449e+00   4.1670217e+01
   2.0298876e+01  -2.2827704e+01   1.0000000e+02   1.1760338e+01  -6.9466073e+00   4.1089133e+01
   2.0198066e+01  -2.2916117e+01   1.0000000e+02   1.4273306e+01  -6.0061973e+00   4.0001355e+01
   2.0101371e+01  -2.3008406e+01   1.0000000e+02   1.6768011e+01  -5.3186976e+00   3.8364728e+01
   2.0008971e+01  -2.3104406e+01   1.0000000e+02   1.9118496e+01  -4.9071189e+00   3.6165700e+01
   1.9921040e+01  -2.3203944e+01   1.0000000e+02   2.1189295e+01  -4.8160375e+00   3.3449264e+01
   1.9837745e+01  -2.3306841e+01   1.0000000e+02   2.2855630e+01  -5.0853270e+00   3.0323173e+01
   1.9759248e+01  -2.3412912e+01   1.0000000e+02   2.4017105e+01  -5.7277908e+00   2.6944480e+01
   1.9685700e+01  -2.3521966e+01   1.0000000e+02   2.4608117e+01  -6.7169348e+00   2.3502191e+01
   1.9617246e+01  -2.3633805e+01   1.0000000e+02   2.4613661e+01  -7.9847741e+00   2.0199989e+01
   1.9554023e+01  -2.3748227e+01   1.0000000e+02   2.4090312e+01  -9.4284386e+00   1.7231122e+01
   1.9496160e+01  -2.3865024e+01   1.0000000e+02   2.3178828e+01  -1.0925853e+01   1.4739938e+01
   1.9443775e+01  -2.3983984e+01   1.0000000e+02   2.2090681e+01  -1.2358711e+01   1.2777422e+01
   1.9396979e+01  -2.4104888e+01   1.0000000e+02   2.1061072e+01  -1.3636186e+01   1.1270707e+01
   1.9355873e+01  -2.4227516e+01   1.0000000e+02   2.0279276e+01  -1.4711088e+01   1.0027249e+01
   1.9320549e+01  -2.4351643e+01   1.0000000e+02   1.9823377e+01  -1.5582864e+01   8.7826802e+00
   1.9291088e+01  -2.4477041e+01   1.0000000e+02   1.9628963e+01  -1.6287212e+01   7.2811577e+00
   1.9267562e+01  -2.4603478e+01   1.0000000e+02   1.9509285e+01  -1.6875830e+01   5.3599509e+00
   1.9250032e+01  -2.4730719e+01   1.0000000e+02   1.9222508e+01  -1.7392126e+01   3.0038916e+00
   1.9238550e+01  -2.4858530e+01   1.0000000e+02   1.8559414e+01  -1.7850662e+01   3.4479508e-01
   1.9233154e+01  -2.4986671e+01   1.0000000e+02   1.7412959e+01  -1.8229026e+01  -2.3937534e+00
   1.9233875e+01  -2.5114905e+01   1.0000000e+02   1.5798769e+01  -1.8477612e+01  -4.9796896e+00
   1.9240730e+01  -2.5242990e+01   1.0000000e+02   1.3820977e+01  -1.8542943e+01  -7.2409778e+00
   1.9253725e+01  -2.5370685e+01   1.0000000e+02   1.1607896e+01  -1.8393011e+01  -9.0871637e+00
   1.9272856e+01  -2.5497751e+01   1.0000000e+02   9.2611976e+00  -1.8034430e+01  -1.0480261e+01
   1.9298106e+01  -2.5623947e+01   1.0000000e+02   6.8509434e+00  -1.7519043e+01  -1.1389058e+01
   1.9329446e+01  -2.5749033e+01   1.0000000e+02   4.4489133e+00  -1.6941482e+01  -1.1772609e+01
   1.9366837e+01  -2.5872771e+01   1.0000000e+02   2.1614190e+00  -1.6427315e+01  -1.1609038e+01
   1.9410225e+01  -2.5994925e+01   1.0000000e+02   1.2891242e-01  -1.6110138e+01  -1.0945393e+01
   1.9459548e+01  -2.6115262e+01   1.0000000e+02  -1.5096738e+00  -1.6099831e+01  -9.9302821e+00
   1.9514729e+01  -2.6233549e+01   1.0000000e+02  -2.6668847e+00  -1.6450598e+01  -8.8063636e+00
   1.9575679e+01  -2.6349558e+01   1.0000000e+02  -3.3473609e+00  -1.7139461e+01  -7.8628796e+00
   1.9642298e+01  -2.6463065e+01   1.0000000e+02  -3.6612128e+00  -1.8062948e+01  -7.3630605e+00
   1.9948419e+01  -2.7071110e+01   1.0000000e+02  -6.1845926e+00  -2.0065118e+01  -9.5426850e+00
   2.0046386e+01  -2.7165472e+01   1.0000000e+02  -7.0778331e+00  -1.9264109e+01  -1.0885811e+01
   2.0148837e+01  -2.7256058e+01   1.0000000e+02  -8.0177346e+00  -1.8150491e+01  -1.1999073e+01
   2.0255598e+01  -2.7342702e+01   1.0000000e+02  -8.8894064e+00  -1.6888276e+01  -1.2865807e+01
   2.0366482e+01  -2.7425244e+01   1.0000000e+02  -9.5974555e+00  -1.5632363e+01  -1.3559076e+01
   2.0481296e+01  -2.7503533e+01   1.0000000e+02  -1.0079301e+01  -1.4476180e+01  -1.4210050e+01
   2.0599836e+01  -2.7577424e+01   1.0000000e+02  -1.0306821e+01  -1.3418641e+01  -1.4957580e+01
   2.0721891e+01  -2.7646780e+01   1.0000000e+02  -1.0282196e+01  -1.2363840e+01  -1.5895475e+01
   2.0847241e+01  -2.7711473e+01   1.0000000e+02  -1.0033693e+01  -1.1155461e+01  -1.7032920e+01
   2.0975661e+01  -2.7771382e+01   1.0000000e+02  -9.6115907e+00  -9.6351312e+00  -1.8279456e+01
   2.1106917e+01  -2.7826395e+01   1.0000000e+02  -9.0798132e+00  -7.7051965e+00  -1.9459837e+01
   2.1240769e+01  -2.7876411e+01   1.0000000e+02  -8.5001554e+00  -5.3738867e+00  -2.0358510e+01
   2.1376971e+01  -2.7921334e+01   1.0000000e+02  -7.9133632e+00  -2.7638804e+00  -2.0786393e+01
   2.1515271e+01  -2.7961082e+01   1.0000000e+02  -7.3291360e+00  -7.2438460e-02  -2.0649852e+01
   2.1655413e+01  -2.7995579e+01   1.0000000e+02  -6.7352390e+00   2.5083889e+00  -1.9985705e+01
   2.1797138e+01  -2.8024762e+01   1.0000000e+02  -6.1224469e+00   4.8718481e+00  -1.8934743e+01
   2.1940180e+01  -2.8048574e+01   1.0000000e+02  -5.5111885e+00   7.0309139e+00  -1.7665858e+01
   2.2084271e+01  -2.8066971e+01   1.0000000e+02  -4.9669253e+00   9.0914693e+00  -1.6293567e+01
   2.2229144e+01  -2.8079920e+01   1.0000000e+02  -4.5964506e+00   1.1182194e+01  -1.4826881e+01
   2.2374524e+01  -2.8087394e+01   1.0000000e+02  -4.5212991e+00   1.3372839e+01  -1.3168450e+01
   2.2520141e+01  -2.8089380e+01   1.0000000e+02  -4.8353129e+00   1.5616582e+01  -1.1165703e+01
   2.2665719e+01  -2.8085875e+01   1.0000000e+02  -5.5706430e+00   1.7746364e+01  -8.6943763e+00
   2.2810986e+01  -2.8076885e+01   1.0000000e+02  -6.6968021e+00   1.9530206e+01  -5.7335755e+00
   2.2955670e+01  -2.8062427e+01   1.0000000e+02  -8.1473016e+00   2.0752299e+01  -2.3978794e+00
   2.3099498e+01  -2.8042528e+01   1.0000000e+02  -9.8379506e+00   2.1280329e+01   1.0759700e+00
   2.3242202e+01  -2.8017226e+01   1.0000000e+02  -1.1657642e+01   2.1110051e+01   4.3762473e+00
   2.3383515e+01  -2.7986567e+01   1.0000000e+02  -1.3458505e+01   2.0384997e+01   7.2030493e+00
   2.3523174e+01  -2.7950611e+01   1.0000000e+02  -1.5081050e+01   1.9357587e+01   9.3792355e+00
   2.3660920e+01  -2.7909424e+01   1.0000000e+02  -1.6408888e+01   1.8282949e+01   1.0903410e+01
   2.3796496e+01  -2.7863083e+01   1.0000000e+02  -1.7407739e+01   1.7327721e+01   1.1889869e+01
   2.3929654e+01  -2.7811676e+01   1.0000000e+02  -1.8114283e+01   1.6569292e+01   1.2468938e+01
   2.4060150e+01  -2.7755298e+01   1.0000000e+02  -1.8590913e+01   1.6043268e+01   1.2748604e+01
   2.4187744e+01  -2.7694055e+01   1.0000000e+02  -1.8888311e+01   1.5760459e+01   1.2829676e+01
   2.4312205e+01  -2.7628060e+01   1.0000000e+02  -1.9033138e+01   1.5693032e+01   1.2811143e+01
   2.4433310e+01  -2.7557436e+01   1.0000000e+02  -1.9029970e+01   1.5772249e+01   1.2774198e+01
   2.4550840e+01  -2.7482315e+01   1.0000000e+02  -1.8867501e+01   1.5907237e+01   1.2774069e+01
   2.4664587e+01  -2.7402835e+01   1.0000000e+02  -1.8531578e+01   1.6001934e+01   1.2849593e+01
   2.4774350e+01  -2.7319142e+01   1.0000000e+02  -1.8027475e+01   1.5959097e+01   1.3026786e+01
   2.4879937e+01  -2.7231392e+01   1.0000000e+02  -1.7397761e+01   1.5688966e+01   1.3299329e+01
   2.4981165e+01  -2.7139745e+01   1.0000000e+02  -1.6716837e+01   1.5137027e+01   1.3607636e+01
   2.5077861e+01  -2.7044369e+01   1.0000000e+02  -1.6063874e+01   1.4311202e+01   1.3849687e+01
   2.5169861e+01  -2.6945437e+01   1.0000000e+02  -1.5495798e+01   1.3278741e+01   1.3919512e+01
   2.5257010e+01  -2.6843131e+01   1.0000000e+02  -1.5035232e+01   1.2132083e+01   1.3742157e+01
   2.5339165e+01  -2.6737636e+01   1.0000000e+02  -1.4672008e+01   1.0949371e+01   1.3286480e+01
   2.5416191e+01  -2.6629143e+01   1.0000000e+02  -1.4370787e+01   9.7729538e+00   1.2560984e+01
   2.5487966e+01  -2.6517847e+01   1.0000000e+02  -1.4080122e+01   8.6120647e+00   1.1605958e+01
   2.5554375e+01  -2.6403948e+01   1.0000000e+02  -1.3744165e+01   7.4610630e+00   1.0489507e+01
   2.5615318e+01  -2.6287652e+01   1.0000000e+02  -1.3319296e+01   6.3187482e+00   9.3036023e+00
   2.5670702e+01  -2.6169165e+01   1.0000000e+02  -1.2791310e+01   5.2014272e+00   8.1515905e+00
   2.5720446e+01  -2.6048698e+01   1.0000000e+02  -1.2184119e+01   4.1486051e+00   7.1273558e+00
   2.5764481e+01  -2.5926466e+01   1.0000000e+02  -1.1555099e+01   3.2219187e+00   6.2938298e+00
   2.5802745e+01  -2.5802684e+01   1.0000000e+02  -1.0977984e+01   2.4964709e+00   5.6673006e+00
   2.5835191e+01  -2.5677571e+01   1.0000000e+02  -1.0514186e+01   2.0457859e+00   5.2116275e+00
   2.5861780e+01  -2.5551347e+01   1.0000000e+02  -1.0177950e+01   1.9248939e+00   4.8526130e+00
   2.5882485e+01  -2.5424232e+01   1.0000000e+02  -9.9180571e+00   2.1556989e+00   4.5190422e+00
   2.5897288e+01  -2.5296449e+01   1.0000000e+02  -9.6428439e+00   2.7189309e+00   4.1909724e+00
   2.5906183e+01  -2.5168220e+01   1.0000000e+02  -9.2839786e+00   3.5559614e+00   3.9157193e+00
   2.5909172e+01  -2.5039767e+01   1.0000000e+02  -8.8575984e+00   4.5794873e+00   3.7721547e+00
   2.5906269e+01  -2.4911313e+01   1.0000000e+02  -8.4815805e+00   5.6866697e+00   3.8019379e+00
   2.5897498e+01  -2.4783078e+01   1.0000000e+02  -8.3356296e+00   6.7700860e+00   3.9449575e+00
   2.5882891e+01  -2.4655284e+01   1.0000000e+02  -8.5779021e+00   7.7265864e+00   4.0154566e+00
   2.5862492e+01  -2.4528148e+01   1.0000000e+02  -9.2550141e+00   8.4660641e+00   3.7421869e+00
   2.5836353e+01  -2.4401889e+01   1.0000000e+02  -1.0254056e+01   8.9206787e+00   2.8629608e+00
   2.5804534e+01  -2.4276721e+01   1.0000000e+02  -1.1325723e+01   9.0529162e+00   1.2253552e+00
   2.5767107e+01  -2.4152857e+01   1.0000000e+02  -1.2159839e+01   8.8578202e+00  -1.1606368e+00
   2.5724151e+01  -2.4030507e+01   1.0000000e+02  -1.2464337e+01   8.3554803e+00  -4.1277247e+00
   2.5675754e+01  -2.3909876e+01   1.0000000e+02  -1.2025625e+01   7.5789052e+00  -7.3810602e+00
   2.5622011e+01  -2.3791169e+01   1.0000000e+02  -1.0765268e+01   6.5698996e+00  -1.0540772e+01
   2.5563027e+01  -2.3674584e+01   1.0000000e+02  -8.7847174e+00   5.3836444e+00  -1.3222624e+01
   2.5498915e+01  -2.3560318e+01   1.0000000e+02  -6.3507181e+00   4.0890638e+00  -1.5148803e+01
   2.5429794e+01  -2.3448561e+01   1.0000000e+02  -3.8052431e+00   2.7576618e+00  -1.6225941e+01
   2.5355792e+01  -2.3339499e+01   1.0000000e+02  -1.4506366e+00   1.4479656e+00  -1.6540818e+01
   2.5277042e+01  -2.3233315e+01   1.0000000e+02   5.2489102e-01   1.9445851e-01  -1.6289031e+01
   2.5193686e+01  -2.3130184e+01   1.0000000e+02   2.0581266e+00  -9.9471902e-01  -1.5688552e+01
   2.5105873e+01  -2.3030278e+01   1.0000000e+02   3.1785396e+00  -2.1301505e+00  -1.4919056e+01
   2.5013755e+01  -2.2933761e+01   1.0000000e+02   3.9650998e+00  -3.2272742e+00  -1.4098990e+01
   2.4917495e+01  -2.2840793e+01   1.0000000e+02   4.5127558e+00  -4.2949313e+00  -1.3290945e+01
   2.4817258e+01  -2.2751528e+01   1.0000000e+02   4.9135359e+00  -5.3328067e+00  -1.2516452e+01
   2.4713215e+01  -2.2666113e+01   1.0000000e+02   5.2455613e+00  -6.3340908e+00  -1.1766800e+01
   2.4605544e+01  -2.2584686e+01   1.0000000e+02   5.5617441e+00  -7.2863976e+00  -1.1010228e+01
   2.4494428e+01  -2.2507383e+01   1.0000000e+02   5.8766645e+00  -8.1703931e+00  -1.0204273e+01
   2.4380052e+01  -2.2434330e+01   1.0000000e+02   6.1590824e+00  -8.9622136e+00  -9.3162511e+00
   2.4262609e+01  -2.2365647e+01   1.0000000e+02   6.3387057e+00  -9.6426507e+00  -8.3434190e+00
   2.4142293e+01  -2.2301445e+01   1.0000000e+02   6.3282357e+00  -1.0209695e+01  -7.3214415e+00
   2.4019305e+01  -2.2241829e+01   1.0000000e+02   6.0543835e+00  -1.0689079e+01  -6.3159801e+00
   2.3893846e+01  -2.2186898e+01   1.0000000e+02   5.4885001e+00  -1.1138128e+01  -5.3969717e+00
   2.3766125e+01  -2.2136739e+01   1.0000000e+02   4.6639828e+00  -1.1636341e+01  -4.6011030e+00
   2.3636349e+01  -2.2091435e+01   1.0000000e+02   3.6675541e+00  -1.2258244e+01  -3.8993405e+00
   2.3504731e+01  -2.2051060e+01   1.0000000e+02   2.6058244e+00  -1.3035319e+01  -3.1956379e+00
   2.3371486e+01  -2.2015679e+01   1.0000000e+02   1.5691362e+00  -1.3931528e+01  -2.3679054e+00
   2.3236830e+01  -2.1985350e+01   1.0000000e+02   6.1639017e-01  -1.4853876e+01  -1.3268466e+00
   2.3100982e+01  -2.1960121e+01   1.0000000e+02  -2.1788161e-01  -1.5692635e+01  -5.4973616e-02
   2.2964163e+01  -2.1940034e+01   1.0000000e+02  -9.1045362e-01  -1.6367612e+01   1.3916480e+00
   2.2826593e+01  -2.1925122e+01   1.0000000e+02  -1.4439466e+00  -1.6858146e+01   2.9131801e+00
   2.2688496e+01  -2.1915408e+01   1.0000000e+02  -1.8109449e+00  -1.7205964e+01   4.4080354e+00
   2.2550094e+01  -2.1910909e+01   1.0000000e+02  -2.0214310e+00  -1.7497179e+01   5.8068232e+00
   2.2411611e+01  -2.1911631e+01   1.0000000e+02  -2.1065805e+00  -1.7837795e+01   7.0919349e+00
   2.2273271e+01  -2.1917574e+01   1.0000000e+02  -2.1164335e+00  -1.8327055e+01   8.3081201e+00
   2.2135297e+01  -2.1928727e+01   1.0000000e+02  -2.1123392e+00  -1.9025785e+01   9.5613970e+00
   2.1997912e+01  -2.1945073e+01   1.0000000e+02  -2.1550668e+00  -1.9927719e+01   1.0998670e+01
   2.1861340e+01  -2.1966586e+01   1.0000000e+02  -2.2901957e+00  -2.0948661e+01   1.2772444e+01
   2.1725799e+01  -2.1993229e+01   1.0000000e+02  -2.5335900e+00  -2.1935844e+01   1.5005013e+01
   2.1591512e+01  -2.2024961e+01   1.0000000e+02  -2.8610286e+00  -2.2688066e+01   1.7757020e+01
   2.1458695e+01  -2.2061730e+01   1.0000000e+02  -3.2072891e+00  -2.2985620e+01   2.0997177e+01
   2.1327566e+01  -2.2103475e+01   1.0000000e+02  -3.4773686e+00  -2.2638797e+01   2.4580229e+01
   2.1198337e+01  -2.2150129e+01   1.0000000e+02  -3.5682862e+00  -2.1550962e+01   2.8257767e+01
   2.1071220e+01  -2.2201616e+01   1.0000000e+02  -3.3936697e+00  -1.9765670e+01   3.1735201e+01
   2.0946424e+01  -2.2257853e+01   1.0000000e+02  -2.9013709e+00  -1.7464174e+01   3.4754870e+01
   2.0824155e+01  -2.2318747e+01   1.0000000e+02  -2.0780638e+00  -1.4910079e+01   3.7162406e+01
   2.0704614e+01  -2.2384199e+01   1.0000000e+02  -9.4023641e-01  -1.2370357e+01   3.8927006e+01
   2.0588000e+01  -2.2454103e+01   1.0000000e+02   4.8340131e-01  -1.0048535e+01   4.0114015e+01
   2.0474506e+01  -2.2528343e+01   1.0000000e+02   2.1686341e+00  -8.0519876e+00   4.0828242e+01
   2.0364324e+01  -2.2606800e+01   1.0000000e+02   4.1017749e+00  -6.3983494e+00   4.1153853e+01
   2.0257639e+01  -2.2689343e+01   1.0000000e+02   6.2696331e+00  -5.0503552e+00   4.1114668e+01
   2.0154632e+01  -2.2775838e+01   1.0000000e+02   8.6394766e+00  -3.9608805e+00   4.0669727e+01
   2.0055477e+01  -2.2866142e+01   1.0000000e+02   1.1140058e+01  -3.1082557e+00   3.9743041e+01
   1.9960346e+01  -2.2960106e+01   1.0000000e+02   1.3657414e+01  -2.5093143e+00   3.8271937e+01
   1.9869404e+01  -2.3057577e+01   1.0000000e+02   1.6049647e+01  -2.2080286e+00   3.6249031e+01
   1.9782808e+01  -2.3158392e+01   1.0000000e+02   1.8172556e+01  -2.2500615e+00   3.3738316e+01
   1.9700711e+01  -2.3262384e+01   1.0000000e+02   1.9902593e+01  -2.6590314e+00   3.0863616e+01
   1.9623261e+01  -2.3369382e+01   1.0000000e+02   2.1148812e+01  -3.4243004e+00   2.7784794e+01
   1.9550595e+01  -2.3479208e+01   1.0000000e+02   2.1858752e+01  -4.5001491e+00   2.4677800e+01
   1.9482847e+01  -2.3591678e+01   1.0000000e+02   2.2028040e+01  -5.8114392e+00   2.1720694e+01
   1.9420141e+01  -2.3706605e+01   1.0000000e+02   2.1714498e+01  -7.2626169e+00   1.9076155e+01
   1.9362596e+01  -2.3823796e+01   1.0000000e+02   2.1046925e+01  -8.7506481e+00   1.6863439e+01
   1.9310322e+01  -2.3943055e+01   1.0000000e+02   2.0214209e+01  -1.0181453e+01   1.5123507e+01
   1.9263420e+01  -2.4064182e+01   1.0000000e+02   1.9427434e+01  -1.1486369e+01   1.3792259e+01
   1.9221985e+01  -2.4186972e+01   1.0000000e+02   1.8861307e+01  -1.2633639e+01   1.2699783e+01
   1.9186102e+01  -2.4311218e+01   1.0000000e+02   1.8595158e+01  -1.3630342e+01   1.1606865e+01
   1.9155847e+01  -2.4436709e+01   1.0000000e+02   1.8579979e+01  -1.4512842e+01   1.0273701e+01
   1.9131290e+01  -2.4563232e+01   1.0000000e+02   1.8650397e+01  -1.5328076e+01   8.5378479e+00
   1.9112488e+01  -2.4690571e+01   1.0000000e+02   1.8582241e+01  -1.6111283e+01   6.3691068e+00
   1.9099491e+01  -2.4818509e+01   1.0000000e+02   1.8173716e+01  -1.6868120e+01   3.8739514e+00
   1.9092340e+01  -2.4946827e+01   1.0000000e+02   1.7312567e+01  -1.7568170e+01   1.2466812e+00
   1.9091065e+01  -2.5075303e+01   1.0000000e+02   1.5998303e+01  -1.8153548e+01  -1.3066381e+00
   1.9095686e+01  -2.5203716e+01   1.0000000e+02   1.4313685e+01  -1.8558895e+01  -3.6320788e+00
   1.9106215e+01  -2.5331844e+01   1.0000000e+02   1.2366541e+01  -1.8733175e+01  -5.6494585e+00
   1.9122651e+01  -2.5459465e+01   1.0000000e+02   1.0238544e+01  -1.8655135e+01  -7.3262331e+00
   1.9144986e+01  -2.5586355e+01   1.0000000e+02   7.9734764e+00  -1.8340845e+01  -8.6285926e+00
   1.9173198e+01  -2.5712294e+01   1.0000000e+02   5.6081882e+00  -1.7846300e+01  -9.4911485e+00
   1.9207258e+01  -2.5837061e+01   1.0000000e+02   3.2164225e+00  -1.7266350e+01  -9.8324273e+00
   1.9247123e+01  -2.5960436e+01   1.0000000e+02   9.2820884e-01  -1.6726339e+01  -9.6065695e+00
   1.9292743e+01  -2.6082202e+01   1.0000000e+02  -1.0901802e+00  -1.6361767e+01  -8.8578660e+00
   1.9344055e+01  -2.6202142e+01   1.0000000e+02  -2.6846482e+00  -1.6287320e+01  -7.7460196e+00
   1.9400984e+01  -2.6320044e+01   1.0000000e+02  -3.7677186e+00  -1.6564071e+01  -6.5282418e+00
   1.9463449e+01  -2.6435698e+01   1.0000000e+02  -4.3563776e+00  -1.7176866e+01  -5.5018011e+00
   1.9531353e+01  -2.6548897e+01   1.0000000e+02  -4.5754565e+00  -1.8030396e+01  -4.9248029e+00
   1.9604592e+01  -2.6659438e+01   1.0000000e+02  -4.6201793e+00  -1.8965511e+01  -4.9460618e+00
   1.9683050e+01  -2.6767121e+01   1.0000000e+02  -4.6933365e+00  -1.9790968e+01  -5.5726698e+00
   1.9766599e+01  -2.6871753e+01   1.0000000e+02  -4.9465541e+00  -2.0324088e+01  -6.6841420e+00
   1.9855105e+01  -2.6973144e+01   1.0000000e+02  -5.4485023e+00  -2.0432403e+01  -8.0805954e+00
   2.0276273e+01  -2.7525541e+01   1.0000000e+02  -9.3273430e+00  -1.5690519e+01  -1.1335022e+01
   2.0391263e+01  -2.7604104e+01   1.0000000e+02  -9.9513301e+00  -1.4731285e+01  -1.2084741e+01
   2.0509864e+01  -2.7678433e+01   1.0000000e+02  -1.0370506e+01  -1.3948323e+01  -1.2910221e+01
   2.0631879e+01  -2.7748401e+01   1.0000000e+02  -1.0544707e+01  -1.3251644e+01  -1.3945583e+01
   2.0757106e+01  -2.7813887e+01   1.0000000e+02  -1.0465458e+01  -1.2465339e+01  -1.5259913e+01
   2.0885336e+01  -2.7874777e+01   1.0000000e+02  -1.0163259e+01  -1.1383323e+01  -1.6816590e+01
   2.1016352e+01  -2.7930967e+01   1.0000000e+02  -9.7016968e+00  -9.8428391e+00  -1.8461999e+01
   2.1149934e+01  -2.7982360e+01   1.0000000e+02  -9.1545306e+00  -7.7897600e+00  -1.9956069e+01
   2.1285852e+01  -2.8028866e+01   1.0000000e+02  -8.5743874e+00  -5.3091289e+00  -2.1043735e+01
   2.1423876e+01  -2.8070404e+01   1.0000000e+02  -7.9720062e+00  -2.6004211e+00  -2.1547187e+01
   2.1563767e+01  -2.8106902e+01   1.0000000e+02  -7.3226203e+00   1.0210692e-01  -2.1434785e+01
   2.1705286e+01  -2.8138297e+01   1.0000000e+02  -6.5972179e+00   2.6301712e+00  -2.0822201e+01
   2.1848187e+01  -2.8164533e+01   1.0000000e+02  -5.7997443e+00   4.9481311e+00  -1.9900949e+01
   2.1992222e+01  -2.8185565e+01   1.0000000e+02  -4.9916097e+00   7.1526111e+00  -1.8834893e+01
   2.2137143e+01  -2.8201357e+01   1.0000000e+02  -4.2943316e+00   9.4085178e+00  -1.7674811e+01
   2.2282695e+01  -2.8211879e+01   1.0000000e+02  -3.8649077e+00   1.1847967e+01  -1.6327145e+01
   2.2428627e+01  -2.8217116e+01   1.0000000e+02  -3.8442611e+00   1.4474909e+01  -1.4595966e+01
   2.2574683e+01  -2.8217055e+01   1.0000000e+02  -4.2992934e+00   1.7128622e+01  -1.2286229e+01
   2.2720608e+01  -2.8211700e+01   1.0000000e+02  -5.1968555e+00   1.9536812e+01  -9.3116741e+00
   2.2866149e+01  -2.8201057e+01   1.0000000e+02  -6.4326837e+00   2.1420813e+01  -5.7390911e+00
   2.3011052e+01  -2.8185146e+01   1.0000000e+02  -7.8883064e+00   2.2574312e+01  -1.7652977e+00
   2.3155065e+01  -2.8163996e+01   1.0000000e+02  -9.4631544e+00   2.2892113e+01   2.3171926e+00
   2.3297937e+01  -2.8137642e+01   1.0000000e+02  -1.1064851e+01   2.2396957e+01   6.1518459e+00
   2.3439422e+01  -2.8106131e+01   1.0000000e+02  -1.2590232e+01   2.1269458e+01   9.4002809e+00
   2.3579274e+01  -2.8069518e+01   1.0000000e+02  -1.3932076e+01   1.9810545e+01   1.1866508e+01
   2.3717252e+01  -2.8027866e+01   1.0000000e+02  -1.5012420e+01   1.8323244e+01   1.3556378e+01
   2.3853120e+01  -2.7981249e+01   1.0000000e+02  -1.5811913e+01   1.7012275e+01   1.4615246e+01
   2.3986646e+01  -2.7929747e+01   1.0000000e+02  -1.6366168e+01   1.5975172e+01   1.5223372e+01
   2.4117601e+01  -2.7873449e+01   1.0000000e+02  -1.6734188e+01   1.5241938e+01   1.5542440e+01
   2.4245765e+01  -2.7812453e+01   1.0000000e+02  -1.6968535e+01   1.4796214e+01   1.5708420e+01
   2.4370922e+01  -2.7746865e+01   1.0000000e+02  -1.7102965e+01   1.4577460e+01   1.5824844e+01
   2.4492862e+01  -2.7676797e+01   1.0000000e+02  -1.7151091e+01   1.4492674e+01   1.5950276e+01
   2.4611383e+01  -2.7602370e+01   1.0000000e+02  -1.7107676e+01   1.4439790e+01   1.6100237e+01
   2.4726290e+01  -2.7523713e+01   1.0000000e+02  -1.6954860e+01   1.4324673e+01   1.6266752e+01
   2.4837393e+01  -2.7440959e+01   1.0000000e+02  -1.6678191e+01   1.4065272e+01   1.6435180e+01
   2.4944514e+01  -2.7354250e+01   1.0000000e+02  -1.6285659e+01   1.3596870e+01   1.6581940e+01
   2.5047479e+01  -2.7263734e+01   1.0000000e+02  -1.5814345e+01   1.2890558e+01   1.6663405e+01
   2.5146126e+01  -2.7169566e+01   1.0000000e+02  -1.5319174e+01   1.1971439e+01   1.6619957e+01
   2.5240299e+01  -2.7071903e+01   1.0000000e+02  -1.4855888e+01   1.0914381e+01   1.6396194e+01
   2.5329851e+01  -2.6970912e+01   1.0000000e+02  -1.4469693e+01   9.8148472e+00   1.5958174e+01
   2.5414645e+01  -2.6866763e+01   1.0000000e+02  -1.4189621e+01   8.7535317e+00   1.5294696e+01
   2.5494552e+01  -2.6759630e+01   1.0000000e+02  -1.4022792e+01   7.7724965e+00   1.4408284e+01
   2.5569454e+01  -2.6649693e+01   1.0000000e+02  -1.3946875e+01   6.8707420e+00   1.3308220e+01
   2.5639242e+01  -2.6537136e+01   1.0000000e+02  -1.3906785e+01   6.0176940e+00   1.2014287e+01
   2.5703813e+01  -2.6422145e+01   1.0000000e+02  -1.3824579e+01   5.1749838e+00   1.0568822e+01
   2.5763079e+01  -2.6304912e+01   1.0000000e+02  -1.3623243e+01   4.3163011e+00   9.0445497e+00
   2.5816957e+01  -2.6185630e+01   1.0000000e+02  -1.3253302e+01   3.4409983e+00   7.5388878e+00
   2.5865377e+01  -2.6064495e+01   1.0000000e+02  -1.2709585e+01   2.5794757e+00   6.1570075e+00
   2.5908276e+01  -2.5941708e+01   1.0000000e+02  -1.2033558e+01   1.7895951e+00   4.9907965e+00
   2.5945602e+01  -2.5817467e+01   1.0000000e+02  -1.1301630e+01   1.1439504e+00   4.0973593e+00
   2.5977311e+01  -2.5691977e+01   1.0000000e+02  -1.0598275e+01   7.1222872e-01   3.4821541e+00
   2.6003372e+01  -2.5565441e+01   1.0000000e+02  -9.9777345e+00   5.4481035e-01   3.1003819e+00
   2.6023759e+01  -2.5438065e+01   1.0000000e+02  -9.4368514e+00   6.6270934e-01   2.8885121e+00
   2.6038458e+01  -2.5310053e+01   1.0000000e+02  -8.9275155e+00   1.0551708e+00   2.8106726e+00
   2.6047463e+01  -2.5181612e+01   1.0000000e+02  -8.4099580e+00   1.6840830e+00   2.8827498e+00
   2.6050779e+01  -2.5052948e+01   1.0000000e+02  -7.9117193e+00   2.4917046e+00   3.1490769e+00
   2.6048417e+01  -2.4924267e+01   1.0000000e+02  -7.5507148e+00   3.4081431e+00   3.6215417e+00
   2.6040400e+01  -2.4795773e+01   1.0000000e+02  -7.5023740e+00   4.3577475e+00   4.2148583e+00
   2.6026758e+01  -2.4667672e+01   1.0000000e+02  -7.9199649e+00   5.2653796e+00   4.7181764e+00
   2.6007529e+01  -2.4540166e+01   1.0000000e+02  -8.8438918e+00   6.0613196e+00   4.8308479e+00
   2.5982761e+01  -2.4413457e+01   1.0000000e+02  -1.0148993e+01   6.6840890e+00   4.2571616e+00
   2.5952508e+01  -2.4287744e+01   1.0000000e+02  -1.1563104e+01   7.0840532e+00   2.8155476e+00
   2.5916835e+01  -2.4163224e+01   1.0000000e+02  -1.2745852e+01   7.2287642e+00   5.0347044e-01
   2.5875813e+01  -2.4040093e+01   1.0000000e+02  -1.3377961e+01   7.1058149e+00  -2.5056773e+00
   2.5829521e+01  -2.3918543e+01   1.0000000e+02  -1.3224762e+01   6.7195846e+00  -5.9038787e+00
   2.5778045e+01  -2.3798764e+01   1.0000000e+02  -1.2184015e+01   6.0884715e+00  -9.2970615e+00
   2.5721479e+01  -2.3680941e+01   1.0000000e+02  -1.0328451e+01   5.2487815e+00  -1.2275547e+01
   2.5659924e+01  -2.3565257e+01   1.0000000e+02  -7.9067014e+00   4.2574547e+00  -1.4518279e+01
   2.5593487e+01  -2.3451890e+01   1.0000000e+02  -5.2687938e+00   3.1826586e+00  -1.5883480e+01
   2.5522283e+01  -2.3341017e+01   1.0000000e+02  -2.7493077e+00   2.0863982e+00  -1.6423671e+01
   2.5446433e+01  -2.3232808e+01   1.0000000e+02  -5.7806685e-01   1.0110791e+00  -1.6323617e+01
   2.5366063e+01  -2.3127428e+01   1.0000000e+02   1.1448207e+00  -2.5052857e-02  -1.5812453e+01
   2.5281307e+01  -2.3025039e+01   1.0000000e+02   2.4251429e+00  -1.0256434e+00  -1.5096077e+01
   2.5192303e+01  -2.2925798e+01   1.0000000e+02   3.3341145e+00  -2.0079921e+00  -1.4322289e+01
   2.5099196e+01  -2.2829857e+01   1.0000000e+02   3.9712014e+00  -2.9902933e+00  -1.3573452e+01
   2.5002135e+01  -2.2737362e+01   1.0000000e+02   4.4381632e+00  -3.9812329e+00  -1.2877258e+01
   2.4901275e+01  -2.2648453e+01   1.0000000e+02   4.8245647e+00  -4.9773389e+00  -1.2222862e+01
   2.4796777e+01  -2.2563265e+01   1.0000000e+02   5.1988853e+00  -5.9648446e+00  -1.1572542e+01
   2.4688803e+01  -2.2481928e+01   1.0000000e+02   5.5980269e+00  -6.9190469e+00  -1.0871077e+01
   2.4577524e+01  -2.2404565e+01   1.0000000e+02   6.0154505e+00  -7.8016867e+00  -1.0063295e+01
   2.4463110e+01  -2.2331292e+01   1.0000000e+02   6.3977470e+00  -8.5653368e+00  -9.1210982e+00
   2.4345741e+01  -2.2262222e+01   1.0000000e+02   6.6575405e+00  -9.1685125e+00  -8.0659972e+00
   2.4225595e+01  -2.2197457e+01   1.0000000e+02   6.6998711e+00  -9.5957024e+00  -6.9729103e+00
   2.4102858e+01  -2.2137095e+01   1.0000000e+02   6.4533853e+00  -9.8743779e+00  -5.9523913e+00
   2.3977715e+01  -2.2081227e+01   1.0000000e+02   5.8978885e+00  -1.0082584e+01  -5.1125031e+00
   2.3850358e+01  -2.2029938e+01   1.0000000e+02   5.0764672e+00  -1.0337152e+01  -4.5083558e+00
   2.3720978e+01  -2.1983304e+01   1.0000000e+02   4.0811160e+00  -1.0756733e+01  -4.1025268e+00
   2.3589772e+01  -2.1941395e+01   1.0000000e+02   3.0161960e+00  -1.1411131e+01  -3.7668261e+00
   2.3456937e+01  -2.1904275e+01   1.0000000e+02   1.9621407e+00  -1.2287085e+01  -3.3335904e+00
   2.3322672e+01  -2.1871998e+01   1.0000000e+02   9.6166804e-01  -1.3295244e+01  -2.6658610e+00
   2.3187180e+01  -2.1844614e+01   1.0000000e+02   3.0443197e-02  -1.4311710e+01  -1.7035472e+00
   2.3050662e+01  -2.1822163e+01   1.0000000e+02  -8.2265082e-01  -1.5226283e+01  -4.6935182e-01
   2.2913322e+01  -2.1804679e+01   1.0000000e+02  -1.5814883e+00  -1.5975864e+01   9.5562642e-01
   2.2775366e+01  -2.1792188e+01   1.0000000e+02  -2.2229917e+00  -1.6554749e+01   2.4688860e+00
   2.2637000e+01  -2.1784709e+01   1.0000000e+02  -2.7283270e+00  -1.7005464e+01   3.9788585e+00
   2.2498430e+01  -2.1782252e+01   1.0000000e+02  -3.0945879e+00  -1.7402117e+01   5.4253684e+00
   2.2359861e+01  -2.1784823e+01   1.0000000e+02  -3.3395326e+00  -1.7832610e+01   6.7936060e+00
   2.2221502e+01  -2.1792416e+01   1.0000000e+02  -3.4994677e+00  -1.8375005e+01   8.1236756e+00
   2.2083558e+01  -2.1805020e+01   1.0000000e+02  -3.6229709e+00  -1.9067956e+01   9.5070871e+00
   2.1946235e+01  -2.1822617e+01   1.0000000e+02  -3.7618687e+00  -1.9888591e+01   1.1064500e+01
   2.1809738e+01  -2.1845180e+01   1.0000000e+02  -3.9595390e+00  -2.0749520e+01   1.2915362e+01
   2.1674271e+01  -2.1872676e+01   1.0000000e+02  -4.2376745e+00  -2.1509962e+01   1.5151671e+01
   2.1540036e+01  -2.1905063e+01   1.0000000e+02  -4.5854698e+00  -2.1991426e+01   1.7813666e+01
   2.1407236e+01  -2.1942292e+01   1.0000000e+02  -4.9565912e+00  -2.2002886e+01   2.0861348e+01
   2.1276069e+01  -2.1984309e+01   1.0000000e+02  -5.2777332e+00  -2.1387014e+01   2.4154381e+01
   2.1146733e+01  -2.2031049e+01   1.0000000e+02  -5.4668034e+00  -2.0078957e+01   2.7466594e+01
   2.1019424e+01  -2.2082443e+01   1.0000000e+02  -5.4530278e+00  -1.8144212e+01   3.0544865e+01
   2.0894334e+01  -2.2138413e+01   1.0000000e+02  -5.1908388e+00  -1.5766527e+01   3.3185021e+01
   2.0771653e+01  -2.2198876e+01   1.0000000e+02  -4.6631092e+00  -1.3191316e+01   3.5284030e+01
   2.0651568e+01  -2.2263739e+01   1.0000000e+02  -3.8742314e+00  -1.0655844e+01   3.6847714e+01
   2.0534263e+01  -2.2332907e+01   1.0000000e+02  -2.8359088e+00  -8.3356305e+00   3.7960297e+01
   2.0419919e+01  -2.2406273e+01   1.0000000e+02  -1.5529047e+00  -6.3206977e+00   3.8732778e+01
   2.0308713e+01  -2.2483727e+01   1.0000000e+02  -1.6676431e-02  -4.6229488e+00   3.9250149e+01
   2.0200816e+01  -2.2565153e+01   1.0000000e+02   1.7871686e+00  -3.2065473e+00   3.9534846e+01
   2.0096398e+01  -2.2650427e+01   1.0000000e+02   3.8595041e+00  -2.0269451e+00   3.9539024e+01
   1.9995623e+01  -2.2739418e+01   1.0000000e+02   6.1650133e+00  -1.0627326e+00   3.9167651e+01
   1.9898650e+01  -2.2831994e+01   1.0000000e+02   8.6190130e+00  -3.2940979e-01   3.8323110e+01
   1.9805634e+01  -2.2928011e+01   1.0000000e+02   1.1092847e+01   1.2878347e-01   3.6951742e+01
   1.9716725e+01  -2.3027325e+01   1.0000000e+02   1.3437920e+01   2.6221747e-01   3.5070725e+01
   1.9632067e+01  -2.3129783e+01   1.0000000e+02   1.5513905e+01   4.0513649e-02   3.2765292e+01
   1.9551798e+01  -2.3235229e+01   1.0000000e+02   1.7208534e+01  -5.3416797e-01   3.0165668e+01
   1.9476052e+01  -2.3343501e+01   1.0000000e+02   1.8444985e+01  -1.4270554e+00   2.7422484e+01
   1.9404954e+01  -2.3454432e+01   1.0000000e+02   1.9184667e+01  -2.5778024e+00   2.4691570e+01
   1.9338627e+01  -2.3567853e+01   1.0000000e+02   1.9433911e+01  -3.9089970e+00   2.2125018e+01
   1.9277184e+01  -2.3683587e+01   1.0000000e+02   1.9254233e+01  -5.3345959e+00   1.9858333e+01
   1.9220732e+01  -2.3801457e+01   1.0000000e+02   1.8768065e+01  -6.7702233e+00   1.7987278e+01
   1.9169372e+01  -2.3921279e+01   1.0000000e+02   1.8147739e+01  -8.1448396e+00   1.6538483e+01
   1.9123198e+01  -2.4042867e+01   1.0000000e+02   1.7581612e+01  -9.4125184e+00   1.5446138e+01
   1.9082297e+01  -2.4166031e+01   1.0000000e+02   1.7222533e+01  -1.0560464e+01   1.4551743e+01
   1.9046746e+01  -2.4290580e+01   1.0000000e+02   1.7136541e+01  -1.1608756e+01   1.3637023e+01
   1.9016617e+01  -2.4416318e+01   1.0000000e+02   1.7274626e+01  -1.2599101e+01   1.2485266e+01
   1.8991974e+01  -2.4543048e+01   1.0000000e+02   1.7483953e+01  -1.3575114e+01   1.0950720e+01
   1.8972871e+01  -2.4670569e+01   1.0000000e+02   1.7559967e+01  -1.4561339e+01   9.0071292e+00
   1.8959356e+01  -2.4798682e+01   1.0000000e+02   1.7320052e+01  -1.5549652e+01   6.7501378e+00
   1.8951466e+01  -2.4927181e+01   1.0000000e+02   1.6663802e+01  -1.6498166e+01   4.3510378e+00
   1.8949233e+01  -2.5055864e+01   1.0000000e+02   1.5591155e+01  -1.7342836e+01   1.9864260e+00
   1.8952678e+01  -2.5184526e+01   1.0000000e+02   1.4174442e+01  -1.8015167e+01  -2.1799092e-01
   1.8961812e+01  -2.5312959e+01   1.0000000e+02   1.2504587e+01  -1.8458734e+01  -2.2044731e+00
   1.8976640e+01  -2.5440959e+01   1.0000000e+02   1.0643172e+01  -1.8639870e+01  -3.9570615e+00
   1.8997156e+01  -2.5568319e+01   1.0000000e+02   8.6096226e+00  -1.8552980e+01  -5.4517183e+00
   1.9023345e+01  -2.5694833e+01   1.0000000e+02   6.4098401e+00  -1.8224209e+01  -6.6199408e+00
   1.9055182e+01  -2.5820297e+01   1.0000000e+02   4.0829704e+00  -1.7715279e+01  -7.3533322e+00
   1.9092635e+01  -2.5944507e+01   1.0000000e+02   1.7319902e+00  -1.7124730e+01  -7.5482125e+00
   1.9135659e+01  -2.6067259e+01   1.0000000e+02  -4.8135038e-01  -1.6580237e+01  -7.1651565e+00
   1.9184203e+01  -2.6188354e+01   1.0000000e+02  -2.3749068e+00  -1.6217376e+01  -6.2742339e+00
   1.9238205e+01  -2.6307592e+01   1.0000000e+02  -3.8014822e+00  -1.6147640e+01  -5.0645968e+00
   1.9297592e+01  -2.6424776e+01   1.0000000e+02  -4.7004263e+00  -1.6425889e+01  -3.8104538e+00
   1.9362282e+01  -2.6539714e+01   1.0000000e+02  -5.1226750e+00  -1.7029973e+01  -2.8013508e+00
   1.9432187e+01  -2.6652214e+01   1.0000000e+02  -5.2137879e+00  -1.7860573e+01  -2.2639895e+00
   1.9507204e+01  -2.6762089e+01   1.0000000e+02  -5.1621923e+00  -1.8760446e+01  -2.3102661e+00
   1.9587223e+01  -2.6869156e+01   1.0000000e+02  -5.1414857e+00  -1.9546314e+01  -2.9291646e+00
   1.9672127e+01  -2.6973236e+01   1.0000000e+02  -5.2733820e+00  -2.0046732e+01  -4.0114325e+00
   1.9761785e+01  -2.7074154e+01   1.0000000e+02  -5.6166620e+00  -2.0139937e+01  -5.3874138e+00
   1.9856060e+01  -2.7171739e+01   1.0000000e+02  -6.1727729e+00  -1.9782552e+01  -6.8675250e+00
   1.9954807e+01  -2.7265827e+01   1.0000000e+02  -6.8986278e+00  -1.9019610e+01  -8.2810612e+00
   2.0057868e+01  -2.7356258e+01   1.0000000e+02  -7.7222869e+00  -1.7972710e+01  -9.5102233e+00
   2.0165081e+01  -2.7442878e+01   1.0000000e+02  -8.5595420e+00  -1.6808175e+01  -1.0514071e+01
   2.0686306e+01  -2.7925669e+01   1.0000000e+02  -1.0986967e+01  -1.3285507e+01  -1.3305930e+01
   2.0814779e+01  -2.7986786e+01   1.0000000e+02  -1.0819016e+01  -1.2649267e+01  -1.5085920e+01
   2.0945959e+01  -2.8043369e+01   1.0000000e+02  -1.0478405e+01  -1.1522140e+01  -1.7115701e+01
   2.1079638e+01  -2.8095326e+01   1.0000000e+02  -1.0050103e+01  -9.7951869e+00  -1.9126133e+01
   2.1215606e+01  -2.8142574e+01   1.0000000e+02  -9.5845649e+00  -7.5210120e+00  -2.0798950e+01
   2.1353647e+01  -2.8185037e+01   1.0000000e+02  -9.0742448e+00  -4.8982481e+00  -2.1884619e+01
   2.1493540e+01  -2.8222644e+01   1.0000000e+02  -8.4669170e+00  -2.1886168e+00  -2.2298053e+01
   2.1635060e+01  -2.8255337e+01   1.0000000e+02  -7.7083760e+00   3.9837559e-01  -2.2136382e+01
   2.1777982e+01  -2.8283060e+01   1.0000000e+02  -6.7880903e+00   2.7939446e+00  -2.1607314e+01
   2.1922073e+01  -2.8305770e+01   1.0000000e+02  -5.7670556e+00   5.0893428e+00  -2.0909609e+01
   2.2067101e+01  -2.8323429e+01   1.0000000e+02  -4.7814500e+00   7.4813479e+00  -2.0120793e+01
   2.2212832e+01  -2.8336008e+01   1.0000000e+02  -4.0197681e+00   1.0159353e+01  -1.9137799e+01
   2.2359029e+01  -2.8343488e+01   1.0000000e+02  -3.6685010e+00   1.3173557e+01  -1.7707556e+01
   2.2505454e+01  -2.8345856e+01   1.0000000e+02  -3.8386131e+00   1.6356994e+01  -1.5553896e+01
   2.2651871e+01  -2.8343107e+01   1.0000000e+02  -4.5143127e+00   1.9369773e+01  -1.2536168e+01
   2.2798041e+01  -2.8335247e+01   1.0000000e+02  -5.5663438e+00   2.1846438e+01  -8.7255296e+00
   2.2943728e+01  -2.8322288e+01   1.0000000e+02  -6.8240528e+00   2.3525630e+01  -4.3530728e+00
   2.3088695e+01  -2.8304252e+01   1.0000000e+02  -8.1488404e+00   2.4274414e+01   2.7732701e-01
   2.3232707e+01  -2.8281167e+01   1.0000000e+02  -9.4590005e+00   2.4068111e+01   4.8170697e+00
   2.3375531e+01  -2.8253072e+01   1.0000000e+02  -1.0707601e+01   2.3013356e+01   8.8907578e+00
   2.3516939e+01  -2.8220012e+01   1.0000000e+02  -1.1849797e+01   2.1370595e+01   1.2187929e+01
   2.3656701e+01  -2.8182041e+01   1.0000000e+02  -1.2832254e+01   1.9488391e+01   1.4577608e+01
   2.3794595e+01  -2.8139219e+01   1.0000000e+02  -1.3611242e+01   1.7678289e+01   1.6131354e+01
   2.3930400e+01  -2.8091618e+01   1.0000000e+02  -1.4176268e+01   1.6135954e+01   1.7042755e+01
   2.4063901e+01  -2.8039313e+01   1.0000000e+02  -1.4553273e+01   1.4943751e+01   1.7531951e+01
   2.4194885e+01  -2.7982389e+01   1.0000000e+02  -1.4786808e+01   1.4104473e+01   1.7794564e+01
   2.4323149e+01  -2.7920938e+01   1.0000000e+02  -1.4921094e+01   1.3564125e+01   1.7981950e+01
   2.4448489e+01  -2.7855059e+01   1.0000000e+02  -1.4991231e+01   1.3229135e+01   1.8187500e+01
   2.4570713e+01  -2.7784858e+01   1.0000000e+02  -1.5020409e+01   1.2989746e+01   1.8440843e+01
   2.4689631e+01  -2.7710446e+01   1.0000000e+02  -1.5017365e+01   1.2743210e+01   1.8718955e+01
   2.4805061e+01  -2.7631944e+01   1.0000000e+02  -1.4975081e+01   1.2405398e+01   1.8970415e+01
   2.4916827e+01  -2.7549475e+01   1.0000000e+02  -1.4876774e+01   1.1913066e+01   1.9137851e+01
   2.5024761e+01  -2.7463172e+01   1.0000000e+02  -1.4708467e+01   1.1228464e+01   1.9168940e+01
   2.5128703e+01  -2.7373171e+01   1.0000000e+02  -1.4469963e+01   1.0352163e+01   1.9020069e+01
   2.5228498e+01  -2.7279614e+01   1.0000000e+02  -1.4177824e+01   9.3324414e+00   1.8663253e+01
   2.5324001e+01  -2.7182650e+01   1.0000000e+02  -1.3863235e+01   8.2563211e+00   1.8095116e+01
   2.5415073e+01  -2.7082429e+01   1.0000000e+02  -1.3569281e+01   7.2232642e+00   1.7337531e+01
   2.5501585e+01  -2.6979111e+01   1.0000000e+02  -1.3346643e+01   6.3138388e+00   1.6425887e+01
   2.5583414e+01  -2.6872856e+01   1.0000000e+02  -1.3243266e+01   5.5658848e+00   1.5389381e+01
   2.5660449e+01  -2.6763829e+01   1.0000000e+02  -1.3285115e+01   4.9659221e+00   1.4234237e+01
   2.5732583e+01  -2.6652200e+01   1.0000000e+02  -1.3454659e+01   4.4601084e+00   1.2942646e+01
   2.5799720e+01  -2.6538143e+01   1.0000000e+02  -1.3682329e+01   3.9785289e+00   1.1492464e+01
   2.5861772e+01  -2.6421832e+01   1.0000000e+02  -1.3861867e+01   3.4611169e+00   9.8860671e+00
   2.5918660e+01  -2.6303447e+01   1.0000000e+02  -1.3883412e+01   2.8757732e+00   8.1697685e+00
   2.5970313e+01  -2.6183169e+01   1.0000000e+02  -1.3667609e+01   2.2259948e+00   6.4343433e+00
   2.6016669e+01  -2.6061182e+01   1.0000000e+02  -1.3187910e+01   1.5486387e+00   4.7996992e+00
   2.6057675e+01  -2.5937671e+01   1.0000000e+02  -1.2477864e+01   9.0345426e-01   3.3895837e+00
   2.6093286e+01  -2.5812825e+01   1.0000000e+02  -1.1622358e+01   3.5706143e-01   2.3000306e+00
   2.6123465e+01  -2.5686832e+01   1.0000000e+02  -1.0728485e+01  -3.3608674e-02   1.5702013e+00
   2.6148185e+01  -2.5559882e+01   1.0000000e+02  -9.8809366e+00  -2.3217981e-01   1.1757806e+00
   2.6167426e+01  -2.5432165e+01   1.0000000e+02  -9.1085743e+00  -2.2509618e-01   1.0586801e+00
   2.6181176e+01  -2.5303873e+01   1.0000000e+02  -8.3931972e+00  -1.7550035e-02   1.1757915e+00
   2.6189434e+01  -2.5175198e+01   1.0000000e+02  -7.7209646e+00   3.7195226e-01   1.5264410e+00
   2.6192204e+01  -2.5046330e+01   1.0000000e+02  -7.1401984e+00   9.1460267e-01   2.1315402e+00
   2.6189500e+01  -2.4917461e+01   1.0000000e+02  -6.7817172e+00   1.5723981e+00   2.9733890e+00
   2.6181342e+01  -2.4788782e+01   1.0000000e+02  -6.8215495e+00   2.3015059e+00   3.9335997e+00
   2.6167759e+01  -2.4660481e+01   1.0000000e+02  -7.3996707e+00   3.0578411e+00   4.7707902e+00
   2.6148789e+01  -2.4532749e+01   1.0000000e+02  -8.5339255e+00   3.7993505e+00   5.1615424e+00
   2.6124475e+01  -2.4405771e+01   1.0000000e+02  -1.0074247e+01   4.4824183e+00   4.7956456e+00
   2.6094868e+01  -2.4279733e+01   1.0000000e+02  -1.1724900e+01   5.0577642e+00   3.4840953e+00
   2.6060027e+01  -2.4154819e+01   1.0000000e+02  -1.3124942e+01   5.4733525e+00   1.2256454e+00
   2.6020018e+01  -2.4031210e+01   1.0000000e+02  -1.3940664e+01   5.6832306e+00  -1.7948865e+00
   2.5974912e+01  -2.3909085e+01   1.0000000e+02  -1.3930958e+01   5.6555339e+00  -5.2526723e+00
   2.5924790e+01  -2.3788621e+01   1.0000000e+02  -1.2990593e+01   5.3782723e+00  -8.7384219e+00
   2.5869736e+01  -2.3669991e+01   1.0000000e+02  -1.1187128e+01   4.8663812e+00  -1.1828195e+01
   2.5809843e+01  -2.3553365e+01   1.0000000e+02  -8.7651989e+00   4.1650657e+00  -1.4182843e+01
   2.5745208e+01  -2.3438912e+01   1.0000000e+02  -6.0800000e+00   3.3398462e+00  -1.5641176e+01
   2.5675937e+01  -2.3326794e+01   1.0000000e+02  -3.4810275e+00   2.4559027e+00  -1.6243156e+01
   2.5602138e+01  -2.3217172e+01   1.0000000e+02  -1.2165751e+00   1.5610780e+00  -1.6170925e+01
   2.5523926e+01  -2.3110201e+01   1.0000000e+02   5.9659510e-01   6.8025270e-01  -1.5658830e+01
   2.5441424e+01  -2.3006035e+01   1.0000000e+02   1.9513016e+00  -1.8284837e-01  -1.4924994e+01
   2.5354757e+01  -2.2904819e+01   1.0000000e+02   2.9119179e+00  -1.0412742e+00  -1.4136275e+01
   2.5264056e+01  -2.2806699e+01   1.0000000e+02   3.5794268e+00  -1.9164799e+00  -1.3395069e+01
   2.5169457e+01  -2.2711812e+01   1.0000000e+02   4.0636765e+00  -2.8266537e+00  -1.2740694e+01
   2.5071102e+01  -2.2620292e+01   1.0000000e+02   4.4640154e+00  -3.7777994e+00  -1.2162260e+01
   2.4969133e+01  -2.2532269e+01   1.0000000e+02   4.8584096e+00  -4.7618712e+00  -1.1614654e+01
   2.4863703e+01  -2.2447865e+01   1.0000000e+02   5.2958463e+00  -5.7574000e+00  -1.1030830e+01
   2.4754962e+01  -2.2367199e+01   1.0000000e+02   5.7867574e+00  -6.7265191e+00  -1.0335347e+01
   2.4643070e+01  -2.2290385e+01   1.0000000e+02   6.2951165e+00  -7.6117135e+00  -9.4690147e+00
   2.4528186e+01  -2.2217530e+01   1.0000000e+02   6.7431291e+00  -8.3436877e+00  -8.4203081e+00
   2.4410476e+01  -2.2148736e+01   1.0000000e+02   7.0317798e+00  -8.8625989e+00  -7.2447291e+00
   2.4290106e+01  -2.2084099e+01   1.0000000e+02   7.0696311e+00  -9.1439742e+00  -6.0599989e+00
   2.4167247e+01  -2.2023709e+01   1.0000000e+02   6.8013086e+00  -9.2203332e+00  -5.0177781e+00
   2.4042073e+01  -2.1967650e+01   1.0000000e+02   6.2282342e+00  -9.1905561e+00  -4.2543475e+00
   2.3914760e+01  -2.1916000e+01   1.0000000e+02   5.4103651e+00  -9.2043130e+00  -3.8310881e+00
   2.3785486e+01  -2.1868832e+01   1.0000000e+02   4.4428347e+00  -9.4159408e+00  -3.6942271e+00
   2.3654432e+01  -2.1826210e+01   1.0000000e+02   3.4183935e+00  -9.9239894e+00  -3.6845206e+00
   2.3521781e+01  -2.1788195e+01   1.0000000e+02   2.3976068e+00  -1.0730675e+01  -3.5993301e+00
   2.3387718e+01  -2.1754838e+01   1.0000000e+02   1.4019091e+00  -1.1747794e+01  -3.2715635e+00
   2.3252428e+01  -2.1726186e+01   1.0000000e+02   4.2776800e-01  -1.2842642e+01  -2.6199612e+00
   2.3116098e+01  -2.1702278e+01   1.0000000e+02  -5.3045444e-01  -1.3891566e+01  -1.6528590e+00
   2.2978918e+01  -2.1683149e+01   1.0000000e+02  -1.4625964e+00  -1.4814511e+01  -4.3899461e-01
   2.2841078e+01  -2.1668824e+01   1.0000000e+02  -2.3393711e+00  -1.5583000e+01   9.3035280e-01
   2.2702767e+01  -2.1659323e+01   1.0000000e+02  -3.1234284e+00  -1.6210404e+01   2.3688519e+00
   2.2564176e+01  -2.1654660e+01   1.0000000e+02  -3.7847273e+00  -1.6739515e+01   3.8085226e+00
   2.2425496e+01  -2.1654840e+01   1.0000000e+02  -4.3102841e+00  -1.7233660e+01   5.2096035e+00
   2.2286920e+01  -2.1659864e+01   1.0000000e+02  -4.7063114e+00  -1.7763166e+01   6.5735898e+00
   2.2148637e+01  -2.1669725e+01   1.0000000e+02  -4.9963785e+00  -1.8380268e+01   7.9500653e+00
   2.2010839e+01  -2.1684408e+01   1.0000000e+02  -5.2176216e+00  -1.9092429e+01   9.4248776e+00
   2.1873716e+01  -2.1703895e+01   1.0000000e+02  -5.4142784e+00  -1.9851178e+01   1.1094411e+01
   2.1737458e+01  -2.1728157e+01   1.0000000e+02  -5.6277551e+00  -2.0558616e+01   1.3042019e+01
   2.1602252e+01  -2.1757160e+01   1.0000000e+02  -5.8841900e+00  -2.1079189e+01   1.5322106e+01
   2.1468288e+01  -2.1790866e+01   1.0000000e+02  -6.1836077e+00  -2.1252011e+01   1.7940717e+01
   2.1335749e+01  -2.1829227e+01   1.0000000e+02  -6.4961131e+00  -2.0916593e+01   2.0829684e+01
   2.1204822e+01  -2.1872189e+01   1.0000000e+02  -6.7683213e+00  -1.9960701e+01   2.3834392e+01
   2.1075688e+01  -2.1919694e+01   1.0000000e+02  -6.9385851e+00  -1.8371656e+01   2.6741137e+01
   2.0948528e+01  -2.1971674e+01   1.0000000e+02  -6.9538529e+00  -1.6255608e+01   2.9340278e+01
   2.0823520e+01  -2.2028059e+01   1.0000000e+02  -6.7807345e+00  -1.3808128e+01   3.1490874e+01
   2.0700841e+01  -2.2088768e+01   1.0000000e+02  -6.4076650e+00  -1.1254673e+01   3.3151706e+01
   2.0580663e+01  -2.2153718e+01   1.0000000e+02  -5.8381234e+00  -8.7930082e+00   3.4372804e+01
   2.0463158e+01  -2.2222818e+01   1.0000000e+02  -5.0777108e+00  -6.5571292e+00   3.5260341e+01
   2.0348491e+01  -2.2295971e+01   1.0000000e+02  -4.1206961e+00  -4.6064236e+00   3.5930789e+01
   2.0236828e+01  -2.2373076e+01   1.0000000e+02  -2.9437792e+00  -2.9381164e+00   3.6467297e+01
   2.0128329e+01  -2.2454024e+01   1.0000000e+02  -1.5121843e+00  -1.5152453e+00   3.6890430e+01
   2.0023151e+01  -2.2538701e+01   1.0000000e+02   2.0277891e-01  -2.9901036e-01   3.7152027e+01
   1.9921446e+01  -2.2626990e+01   1.0000000e+02   2.2002642e+00   7.2618882e-01   3.7153176e+01
   1.9823365e+01  -2.2718765e+01   1.0000000e+02   4.4306986e+00   1.5422258e+00   3.6781226e+01
   1.9729052e+01  -2.2813897e+01   1.0000000e+02   6.7928987e+00   2.1042282e+00   3.5953377e+01
   1.9638647e+01  -2.2912253e+01   1.0000000e+02   9.1510952e+00   2.3611937e+00   3.4648072e+01
   1.9552286e+01  -2.3013693e+01   1.0000000e+02   1.1362999e+01   2.2791888e+00   3.2910744e+01
   1.9470099e+01  -2.3118074e+01   1.0000000e+02   1.3304328e+01   1.8549925e+00   3.0836947e+01
   1.9392212e+01  -2.3225247e+01   1.0000000e+02   1.4881111e+01   1.1165899e+00   2.8548631e+01
   1.9318746e+01  -2.3335061e+01   1.0000000e+02   1.6032819e+01   1.1574550e-01   2.6177001e+01
   1.9249816e+01  -2.3447358e+01   1.0000000e+02   1.6734063e+01  -1.0805413e+00   2.3854469e+01
   1.9185531e+01  -2.3561979e+01   1.0000000e+02   1.7000708e+01  -2.3976098e+00   2.1708789e+01
   1.9125995e+01  -2.3678760e+01   1.0000000e+02   1.6898402e+01  -3.7603915e+00   1.9851349e+01
   1.9071306e+01  -2.3797532e+01   1.0000000e+02   1.6545547e+01  -5.1016567e+00   1.8355620e+01
   1.9021554e+01  -2.3918126e+01   1.0000000e+02   1.6100405e+01  -6.3715211e+00   1.7230415e+01
   1.8976826e+01  -2.4040367e+01   1.0000000e+02   1.5727835e+01  -7.5467488e+00   1.6401469e+01
   1.8937199e+01  -2.4164080e+01   1.0000000e+02   1.5552861e+01  -8.6359513e+00   1.5716245e+01
   1.8902746e+01  -2.4289084e+01   1.0000000e+02   1.5618760e+01  -9.6753279e+00   1.4978195e+01
   1.8873531e+01  -2.4415198e+01   1.0000000e+02   1.5867901e+01  -1.0713313e+01   1.4002161e+01
   1.8849613e+01  -2.4542239e+01   1.0000000e+02   1.6156986e+01  -1.1788821e+01   1.2672155e+01
   1.8831043e+01  -2.4670020e+01   1.0000000e+02   1.6305489e+01  -1.2912168e+01   1.0977817e+01
   1.8817863e+01  -2.4798355e+01   1.0000000e+02   1.6159484e+01  -1.4057542e+01   9.0102470e+00
   1.8810111e+01  -2.4927055e+01   1.0000000e+02   1.5640729e+01  -1.5169779e+01   6.9173396e+00
   1.8807813e+01  -2.5055931e+01   1.0000000e+02   1.4757528e+01  -1.6180203e+01   4.8424203e+00
   1.8810992e+01  -2.5184791e+01   1.0000000e+02   1.3576313e+01  -1.7022882e+01   2.8775463e+00
   1.8819658e+01  -2.5313444e+01   1.0000000e+02   1.2171936e+01  -1.7645176e+01   1.0529727e+00
   1.8833818e+01  -2.5441700e+01   1.0000000e+02   1.0585046e+01  -1.8012498e+01  -6.3476744e-01
   1.8853467e+01  -2.5569366e+01   1.0000000e+02   8.8120584e+00  -1.8110163e+01  -2.1733420e+00
   1.8878595e+01  -2.5696251e+01   1.0000000e+02   6.8338125e+00  -1.7946475e+01  -3.4971932e+00
   1.8909179e+01  -2.5822166e+01   1.0000000e+02   4.6623549e+00  -1.7558177e+01  -4.4871755e+00
   1.8945193e+01  -2.5946919e+01   1.0000000e+02   2.3750090e+00  -1.7016186e+01  -5.0087275e+00
   1.8986599e+01  -2.6070322e+01   1.0000000e+02   1.1728741e-01  -1.6426136e+01  -4.9681386e+00
   1.9033352e+01  -2.6192188e+01   1.0000000e+02  -1.9254125e+00  -1.5918033e+01  -4.3640232e+00
   1.9085398e+01  -2.6312332e+01   1.0000000e+02  -3.5773490e+00  -1.5622157e+01  -3.3139173e+00
   1.9142673e+01  -2.6430569e+01   1.0000000e+02  -4.7269299e+00  -1.5635969e+01  -2.0420373e+00
   1.9205107e+01  -2.6546718e+01   1.0000000e+02  -5.3641145e+00  -1.5994011e+01  -8.2600445e-01
   1.9272619e+01  -2.6660601e+01   1.0000000e+02  -5.5799236e+00  -1.6653839e+01   7.7796477e-02
   1.9345121e+01  -2.6772041e+01   1.0000000e+02  -5.5275533e+00  -1.7503331e+01   4.9406884e-01
   1.9422517e+01  -2.6880867e+01   1.0000000e+02  -5.3707837e+00  -1.8384097e+01   3.4983869e-01
   1.9504699e+01  -2.6986910e+01   1.0000000e+02  -5.2485935e+00  -1.9122259e+01  -3.3563660e-01
   1.9591555e+01  -2.7090003e+01   1.0000000e+02  -5.2625157e+00  -1.9562160e+01  -1.4701266e+00
   1.9682962e+01  -2.7189986e+01   1.0000000e+02  -5.4747694e+00  -1.9599343e+01  -2.9074951e+00
   1.9778789e+01  -2.7286702e+01   1.0000000e+02  -5.9077940e+00  -1.9205126e+01  -4.4727836e+00
   1.9878898e+01  -2.7379999e+01   1.0000000e+02  -6.5461734e+00  -1.8434161e+01  -5.9953465e+00
   1.9983142e+01  -2.7469729e+01   1.0000000e+02  -7.3434396e+00  -1.7412952e+01  -7.3430279e+00
   2.0091368e+01  -2.7555751e+01   1.0000000e+02  -8.2308557e+00  -1.6312211e+01  -8.4493233e+00
   2.0203413e+01  -2.7637929e+01   1.0000000e+02  -9.1235015e+00  -1.5306341e+01  -9.3299113e+00
   2.0319108e+01  -2.7716131e+01   1.0000000e+02  -9.9257820e+00  -1.4524045e+01  -1.0085702e+01
   2.0438279e+01  -2.7790233e+01   1.0000000e+02  -1.0543627e+01  -1.4000956e+01  -1.0884035e+01
   2.0560741e+01  -2.7860116e+01   1.0000000e+02  -1.0905786e+01  -1.3652743e+01  -1.1911664e+01
   2.1165322e+01  -2.8262981e+01   1.0000000e+02  -1.0904818e+01  -9.2797090e+00  -2.0171095e+01
   2.1302850e+01  -2.8305387e+01   1.0000000e+02  -1.0593881e+01  -6.8369325e+00  -2.1689411e+01
   2.1442164e+01  -2.8343157e+01   1.0000000e+02  -1.0110408e+01  -4.2520326e+00  -2.2521718e+01
   2.1583055e+01  -2.8376234e+01   1.0000000e+02  -9.3776388e+00  -1.7462511e+00  -2.2769433e+01
   2.1725317e+01  -2.8404569e+01   1.0000000e+02  -8.3810470e+00   6.0511664e-01  -2.2653980e+01
   2.1868736e+01  -2.8428119e+01   1.0000000e+02  -7.1886942e+00   2.9002909e+00  -2.2389087e+01
   2.2013100e+01  -2.8446848e+01   1.0000000e+02  -5.9487862e+00   5.3659825e+00  -2.2056154e+01
   2.2158193e+01  -2.8460729e+01   1.0000000e+02  -4.8682452e+00   8.2424427e+00  -2.1525148e+01
   2.2303797e+01  -2.8469741e+01   1.0000000e+02  -4.1637434e+00   1.1624323e+01  -2.0472029e+01
   2.2449696e+01  -2.8473871e+01   1.0000000e+02  -3.9869110e+00   1.5338972e+01  -1.8524283e+01
   2.2595669e+01  -2.8473111e+01   1.0000000e+02  -4.3584203e+00   1.8968555e+01  -1.5474643e+01
   2.2741500e+01  -2.8467463e+01   1.0000000e+02  -5.1600068e+00   2.2032656e+01  -1.1409145e+01
   2.2886969e+01  -2.8456936e+01   1.0000000e+02  -6.1965434e+00   2.4190198e+01  -6.6451478e+00
   2.3031858e+01  -2.8441545e+01   1.0000000e+02  -7.2851951e+00   2.5299457e+01  -1.5673077e+00
   2.3175951e+01  -2.8421314e+01   1.0000000e+02  -8.3151855e+00   2.5355042e+01   3.4612239e+00
   2.3319033e+01  -2.8396273e+01   1.0000000e+02  -9.2533991e+00   2.4448660e+01   8.0906717e+00
   2.3460892e+01  -2.8366459e+01   1.0000000e+02  -1.0107434e+01   2.2791647e+01   1.2001931e+01
   2.3601315e+01  -2.8331918e+01   1.0000000e+02  -1.0879959e+01   2.0705844e+01   1.4991813e+01
   2.3740095e+01  -2.8292700e+01   1.0000000e+02  -1.1549535e+01   1.8537475e+01   1.7039742e+01
   2.3877028e+01  -2.8248866e+01   1.0000000e+02  -1.2085161e+01   1.6558563e+01   1.8286840e+01
   2.4011913e+01  -2.8200479e+01   1.0000000e+02  -1.2471045e+01   1.4924046e+01   1.8957485e+01
   2.4144550e+01  -2.8147613e+01   1.0000000e+02  -1.2716111e+01   1.3681922e+01   1.9286270e+01
   2.4274749e+01  -2.8090347e+01   1.0000000e+02  -1.2846597e+01   1.2799606e+01   1.9473388e+01
   2.4402319e+01  -2.8028764e+01   1.0000000e+02  -1.2894940e+01   1.2190679e+01   1.9659601e+01
   2.4527078e+01  -2.7962957e+01   1.0000000e+02  -1.2893879e+01   1.1743706e+01   1.9914966e+01
   2.4648847e+01  -2.7893024e+01   1.0000000e+02  -1.2874826e+01   1.1350079e+01   2.0242566e+01
   2.4767452e+01  -2.7819066e+01   1.0000000e+02  -1.2864679e+01   1.0920852e+01   2.0594621e+01
   2.4882727e+01  -2.7741195e+01   1.0000000e+02  -1.2878931e+01   1.0390476e+01   2.0893165e+01
   2.4994510e+01  -2.7659523e+01   1.0000000e+02  -1.2915415e+01   9.7161069e+00   2.1049704e+01
   2.5102647e+01  -2.7574171e+01   1.0000000e+02  -1.2953764e+01   8.8814244e+00   2.0983647e+01
   2.5206988e+01  -2.7485263e+01   1.0000000e+02  -1.2962960e+01   7.9060389e+00   2.0640179e+01
   2.5307391e+01  -2.7392930e+01   1.0000000e+02  -1.2914223e+01   6.8499982e+00   2.0006061e+01
   2.5403722e+01  -2.7297305e+01   1.0000000e+02  -1.2795585e+01   5.8041779e+00   1.9115923e+01
   2.5495852e+01  -2.7198528e+01   1.0000000e+02  -1.2623097e+01   4.8679131e+00   1.8043780e+01
   2.5583660e+01  -2.7096740e+01   1.0000000e+02  -1.2444841e+01   4.1218517e+00   1.6881461e+01
   2.5667033e+01  -2.6992090e+01   1.0000000e+02  -1.2334321e+01   3.6032693e+00   1.5708488e+01
   2.5745863e+01  -2.6884727e+01   1.0000000e+02  -1.2369037e+01   3.2927959e+00   1.4560090e+01
   2.5820052e+01  -2.6774804e+01   1.0000000e+02  -1.2595713e+01   3.1211958e+00   1.3409270e+01
   2.5889508e+01  -2.6662480e+01   1.0000000e+02  -1.2998144e+01   2.9954844e+00   1.2179612e+01
   2.5954147e+01  -2.6547913e+01   1.0000000e+02  -1.3489120e+01   2.8305799e+00   1.0786617e+01
   2.6013892e+01  -2.6431267e+01   1.0000000e+02  -1.3933600e+01   2.5717166e+00   9.1846691e+00
   2.6068675e+01  -2.6312706e+01   1.0000000e+02  -1.4190154e+01   2.2022109e+00   7.3954548e+00
   2.6118434e+01  -2.6192397e+01   1.0000000e+02  -1.4150897e+01   1.7396829e+00   5.5098932e+00
   2.6163116e+01  -2.6070510e+01   1.0000000e+02  -1.3768329e+01   1.2259216e+00   3.6692071e+00
   2.6202673e+01  -2.5947215e+01   1.0000000e+02  -1.3067014e+01   7.1360140e-01   2.0327994e+00
   2.6237069e+01  -2.5822683e+01   1.0000000e+02  -1.2137913e+01   2.5205047e-01   7.3683332e-01
   2.6266271e+01  -2.5697088e+01   1.0000000e+02  -1.1108160e+01  -1.2374827e-01  -1.4586700e-01
   2.6290256e+01  -2.5570605e+01   1.0000000e+02  -1.0090301e+01  -3.9592755e-01  -6.2053674e-01
   2.6309007e+01  -2.5443407e+01   1.0000000e+02  -9.1404958e+00  -5.5780734e-01  -7.4227596e-01
   2.6322517e+01  -2.5315670e+01   1.0000000e+02  -8.2606972e+00  -6.0506498e-01  -5.6254400e-01
   2.6330782e+01  -2.5187569e+01   1.0000000e+02  -7.4481701e+00  -5.3147212e-01  -9.3996087e-02
   2.6333808e+01  -2.5059280e+01   1.0000000e+02  -6.7558680e+00  -3.3230804e-01   6.7376207e-01
   2.6331608e+01  -2.4930976e+01   1.0000000e+02  -6.3152983e+00  -1.0683938e-02   1.7155501e+00
   2.6324201e+01  -2.4802834e+01   1.0000000e+02  -6.3002208e+00   4.2167199e-01   2.9098230e+00
   2.6311613e+01  -2.4675025e+01   1.0000000e+02  -6.8489262e+00   9.5026927e-01   4.0180797e+00
   2.6293876e+01  -2.4547724e+01   1.0000000e+02  -7.9851636e+00   1.5613316e+00   4.7215975e+00
   2.6271031e+01  -2.4421101e+01   1.0000000e+02  -9.5750938e+00   2.2354171e+00   4.7047899e+00
   2.6243123e+01  -2.4295326e+01   1.0000000e+02  -1.1341559e+01   2.9355346e+00   3.7534037e+00
   2.6210204e+01  -2.4170568e+01   1.0000000e+02  -1.2931557e+01   3.6016930e+00   1.8249530e+00
   2.6172332e+01  -2.4046993e+01   1.0000000e+02  -1.4003283e+01   4.1586637e+00  -9.3833808e-01
   2.6129572e+01  -2.3924766e+01   1.0000000e+02  -1.4294181e+01   4.5322274e+00  -4.2449184e+00
   2.6081993e+01  -2.3804049e+01   1.0000000e+02  -1.3663855e+01   4.6664575e+00  -7.7061269e+00
   2.6029673e+01  -2.3685003e+01   1.0000000e+02  -1.2129110e+01   4.5389908e+00  -1.0897377e+01
   2.5972691e+01  -2.3567783e+01   1.0000000e+02  -9.8817746e+00   4.1700510e+00  -1.3445669e+01
   2.5911136e+01  -2.3452546e+01   1.0000000e+02  -7.2497190e+00   3.6160648e+00  -1.5128235e+01
   2.5845100e+01  -2.3339442e+01   1.0000000e+02  -4.5947185e+00   2.9472741e+00  -1.5923481e+01
   2.5774679e+01  -2.3228620e+01   1.0000000e+02  -2.2045708e+00   2.2234759e+00  -1.5976808e+01
   2.5699977e+01  -2.3120225e+01   1.0000000e+02  -2.4020228e-01   1.4818781e+00  -1.5514063e+01
   2.5621100e+01  -2.3014399e+01   1.0000000e+02   1.2554301e+00   7.3760364e-01  -1.4763635e+01
   2.5538160e+01  -2.2911279e+01   1.0000000e+02   2.3221297e+00  -1.1444258e-02  -1.3915469e+01
   2.5451275e+01  -2.2810999e+01   1.0000000e+02   3.0493884e+00  -7.7984036e-01  -1.3105118e+01
   2.5360563e+01  -2.2713691e+01   1.0000000e+02   3.5495215e+00  -1.5880200e+00  -1.2406911e+01
   2.5266151e+01  -2.2619479e+01   1.0000000e+02   3.9342625e+00  -2.4529580e+00  -1.1835042e+01
   2.5168167e+01  -2.2528487e+01   1.0000000e+02   4.2971219e+00  -3.3804267e+00  -1.1355014e+01
   2.5066744e+01  -2.2440831e+01   1.0000000e+02   4.7036367e+00  -4.3623413e+00  -1.0899944e+01
   2.4962018e+01  -2.2356625e+01   1.0000000e+02   5.1861129e+00  -5.3760715e+00  -1.0385144e+01
   2.4854130e+01  -2.2275976e+01   1.0000000e+02   5.7379441e+00  -6.3799824e+00  -9.7235601e+00
   2.4743223e+01  -2.2198990e+01   1.0000000e+02   6.3103023e+00  -7.3083775e+00  -8.8508947e+00
   2.4629442e+01  -2.2125764e+01   1.0000000e+02   6.8199076e+00  -8.0775009e+00  -7.7565072e+00
   2.4512939e+01  -2.2056393e+01   1.0000000e+02   7.1696078e+00  -8.6071103e+00  -6.5028392e+00
   2.4393864e+01  -2.1990966e+01   1.0000000e+02   7.2744372e+00  -8.8497136e+00  -5.2210393e+00
   2.4272374e+01  -2.1929566e+01   1.0000000e+02   7.0857919e+00  -8.8171811e+00  -4.0832951e+00
   2.4148626e+01  -2.1872271e+01   1.0000000e+02   6.6077714e+00  -8.5964255e+00  -3.2542746e+00
   2.4022779e+01  -2.1819156e+01   1.0000000e+02   5.8962222e+00  -8.3415726e+00  -2.8305455e+00
   2.3894996e+01  -2.1770288e+01   1.0000000e+02   5.0362684e+00  -8.2343115e+00  -2.7936185e+00
   2.3765441e+01  -2.1725729e+01   1.0000000e+02   4.1090692e+00  -8.4227958e+00  -3.0057361e+00
   2.3634279e+01  -2.1685536e+01   1.0000000e+02   3.1656787e+00  -8.9670792e+00  -3.2570079e+00
   2.3501680e+01  -2.1649760e+01   1.0000000e+02   2.2194882e+00  -9.8218801e+00  -3.3431685e+00
   2.3367810e+01  -2.1618447e+01   1.0000000e+02   1.2569920e+00  -1.0867333e+01  -3.1331333e+00
   2.3232841e+01  -2.1591636e+01   1.0000000e+02   2.5891522e-01  -1.1966266e+01  -2.5933658e+00
   2.3096944e+01  -2.1569362e+01   1.0000000e+02  -7.7902725e-01  -1.3013296e+01  -1.7666280e+00
   2.2960291e+01  -2.1551654e+01   1.0000000e+02  -1.8355637e+00  -1.3953384e+01  -7.2912758e-01
   2.2823057e+01  -2.1538532e+01   1.0000000e+02  -2.8684366e+00  -1.4772827e+01   4.4394456e-01
   2.2685413e+01  -2.1530015e+01   1.0000000e+02  -3.8290131e+00  -1.5483067e+01   1.6909595e+00
   2.2547535e+01  -2.1526113e+01   1.0000000e+02  -4.6761220e+00  -1.6113533e+01   2.9642456e+00
   2.2409597e+01  -2.1526832e+01   1.0000000e+02  -5.3832887e+00  -1.6710829e+01   4.2364218e+00
   2.2271773e+01  -2.1532169e+01   1.0000000e+02  -5.9408932e+00  -1.7328580e+01   5.5142540e+00
   2.2134238e+01  -2.1542118e+01   1.0000000e+02  -6.3564901e+00  -1.8003251e+01   6.8443510e+00
   2.1997165e+01  -2.1556667e+01   1.0000000e+02  -6.6537035e+00  -1.8730336e+01   8.2988541e+00
   2.1860729e+01  -2.1575798e+01   1.0000000e+02  -6.8682528e+00  -1.9457701e+01   9.9501700e+00
   2.1725102e+01  -2.1599485e+01   1.0000000e+02  -7.0408134e+00  -2.0094889e+01   1.1852751e+01
   2.1590456e+01  -2.1627699e+01   1.0000000e+02  -7.2073019e+00  -2.0524137e+01   1.4034897e+01
   2.1456963e+01  -2.1660403e+01   1.0000000e+02  -7.3885287e+00  -2.0609046e+01   1.6487262e+01
   2.1324792e+01  -2.1697557e+01   1.0000000e+02  -7.5824722e+00  -2.0214246e+01   1.9142830e+01
   2.1194112e+01  -2.1739113e+01   1.0000000e+02  -7.7636611e+00  -1.9245428e+01   2.1865449e+01
   2.1065091e+01  -2.1785018e+01   1.0000000e+02  -7.8913743e+00  -1.7694108e+01   2.4470826e+01
   2.0937892e+01  -2.1835213e+01   1.0000000e+02  -7.9234561e+00  -1.5655072e+01   2.6779451e+01
   2.0812680e+01  -2.1889635e+01   1.0000000e+02  -7.8290653e+00  -1.3300990e+01   2.8671760e+01
   2.0689616e+01  -2.1948213e+01   1.0000000e+02  -7.5951333e+00  -1.0830376e+01   3.0115086e+01
   2.0568860e+01  -2.2010874e+01   1.0000000e+02  -7.2244141e+00  -8.4188325e+00   3.1156769e+01
   2.0450568e+01  -2.2077536e+01   1.0000000e+02  -6.7259544e+00  -6.1897065e+00   3.1896676e+01
   2.0334895e+01  -2.2148115e+01   1.0000000e+02  -6.1013820e+00  -4.2049617e+00   3.2452606e+01
   2.0221992e+01  -2.2222520e+01   1.0000000e+02  -5.3339157e+00  -2.4723826e+00   3.2925044e+01
   2.0112007e+01  -2.2300655e+01   1.0000000e+02  -4.3863527e+00  -9.6554890e-01   3.3369129e+01
   2.0005087e+01  -2.2382421e+01   1.0000000e+02  -3.2099674e+00   3.5090037e-01   3.3780991e+01
   1.9901373e+01  -2.2467711e+01   1.0000000e+02  -1.7625627e+00   1.4997298e+00   3.4100330e+01
   1.9801004e+01  -2.2556416e+01   1.0000000e+02  -3.0813967e-02   2.4782448e+00   3.4228554e+01
   1.9704116e+01  -2.2648422e+01   1.0000000e+02   1.9516672e+00   3.2564409e+00   3.4059336e+01
   1.9610841e+01  -2.2743609e+01   1.0000000e+02   4.1012528e+00   3.7871235e+00   3.3513582e+01
   1.9521305e+01  -2.2841855e+01   1.0000000e+02   6.2996457e+00   4.0246600e+00   3.2563970e+01
   1.9435633e+01  -2.2943031e+01   1.0000000e+02   8.4188290e+00   3.9430882e+00   3.1238699e+01
   1.9353944e+01  -2.3047007e+01   1.0000000e+02   1.0343048e+01   3.5449017e+00   2.9607882e+01
   1.9276353e+01  -2.3153647e+01   1.0000000e+02   1.1980463e+01   2.8593483e+00   2.7765310e+01
   1.9202970e+01  -2.3262812e+01   1.0000000e+02   1.3266770e+01   1.9354175e+00   2.5815115e+01
   1.9133901e+01  -2.3374359e+01   1.0000000e+02   1.4166245e+01   8.3448874e-01   2.3865039e+01
   1.9069247e+01  -2.3488141e+01   1.0000000e+02   1.4675161e+01  -3.7610877e-01   2.2022582e+01
   1.9009104e+01  -2.3604011e+01   1.0000000e+02   1.4828854e+01  -1.6294044e+00   2.0388219e+01
   1.8953562e+01  -2.3721815e+01   1.0000000e+02   1.4707828e+01  -2.8654504e+00   1.9040700e+01
   1.8902707e+01  -2.3841398e+01   1.0000000e+02   1.4434067e+01  -4.0393904e+00   1.8014519e+01
   1.8856619e+01  -2.3962601e+01   1.0000000e+02   1.4149979e+01  -5.1301974e+00   1.7279355e+01
   1.8815371e+01  -2.4085264e+01   1.0000000e+02   1.3982759e+01  -6.1468291e+00   1.6735353e+01
   1.8779032e+01  -2.4209225e+01   1.0000000e+02   1.4006729e+01  -7.1262063e+00   1.6231950e+01
   1.8747664e+01  -2.4334317e+01   1.0000000e+02   1.4218516e+01  -8.1201882e+00   1.5606257e+01
   1.8721324e+01  -2.4460373e+01   1.0000000e+02   1.4535715e+01  -9.1748903e+00   1.4728820e+01
   1.8700062e+01  -2.4587226e+01   1.0000000e+02   1.4822218e+01  -1.0310122e+01   1.3541251e+01
   1.8683922e+01  -2.4714703e+01   1.0000000e+02   1.4933682e+01  -1.1508494e+01   1.2070145e+01
   1.8672941e+01  -2.4842634e+01   1.0000000e+02   1.4765374e+01  -1.2719840e+01   1.0408964e+01
   1.8667150e+01  -2.4970845e+01   1.0000000e+02   1.4280659e+01  -1.3877266e+01   8.6755173e+00
   1.8666572e+01  -2.5099163e+01   1.0000000e+02   1.3507726e+01  -1.4914938e+01   6.9650827e+00
   1.8671226e+01  -2.5227412e+01   1.0000000e+02   1.2507618e+01  -1.5779159e+01   5.3213062e+00
   1.8681121e+01  -2.5355419e+01   1.0000000e+02   1.1330260e+01  -1.6431439e+01   3.7393711e+00
   1.8696260e+01  -2.5483007e+01   1.0000000e+02   9.9839188e+00  -1.6847257e+01   2.2008269e+00
   1.8716639e+01  -2.5610002e+01   1.0000000e+02   8.4377257e+00  -1.7015052e+01   7.2019853e-01
   1.8742248e+01  -2.5736228e+01   1.0000000e+02   6.6565038e+00  -1.6938494e+01  -6.2610607e-01
   1.8773067e+01  -2.5861510e+01   1.0000000e+02   4.6448436e+00  -1.6642216e+01  -1.7069202e+00
   1.8809070e+01  -2.5985676e+01   1.0000000e+02   2.4745322e+00  -1.6178570e+01  -2.3747298e+00
   1.8850225e+01  -2.6108553e+01   1.0000000e+02   2.8400575e-01  -1.5631622e+01  -2.5164866e+00
   1.8896490e+01  -2.6229968e+01   1.0000000e+02  -1.7475453e+00  -1.5113528e+01  -2.0995322e+00
   1.8947817e+01  -2.6349751e+01   1.0000000e+02  -3.4434008e+00  -1.4748564e+01  -1.1992654e+00
   1.9004149e+01  -2.6467735e+01   1.0000000e+02  -4.6781357e+00  -1.4644864e+01   4.3261475e-03
   1.9065423e+01  -2.6583752e+01   1.0000000e+02  -5.4137018e+00  -1.4862971e+01   1.2667078e+00
   1.9131567e+01  -2.6697639e+01   1.0000000e+02  -5.7035665e+00  -1.5395276e+01   2.3416827e+00
   1.9202504e+01  -2.6809234e+01   1.0000000e+02  -5.6632881e+00  -1.6165559e+01   3.0352060e+00
   1.9278145e+01  -2.6918377e+01   1.0000000e+02  -5.4301626e+00  -1.7045770e+01   3.2283437e+00
   1.9358398e+01  -2.7024914e+01   1.0000000e+02  -5.1366820e+00  -1.7880861e+01   2.8755158e+00
   1.9443161e+01  -2.7128690e+01   1.0000000e+02  -4.9016222e+00  -1.8515249e+01   1.9992602e+00
   1.9532325e+01  -2.7229558e+01   1.0000000e+02  -4.8252434e+00  -1.8820838e+01   6.8892819e-01
   1.9625774e+01  -2.7327370e+01   1.0000000e+02  -4.9796976e+00  -1.8724031e+01  -9.0794426e-01
   1.9723385e+01  -2.7421987e+01   1.0000000e+02  -5.3993400e+00  -1.8223615e+01  -2.6103429e+00
   1.9825027e+01  -2.7513269e+01   1.0000000e+02  -6.0783255e+00  -1.7393401e+01  -4.2385777e+00
   1.9930563e+01  -2.7601086e+01   1.0000000e+02  -6.9740579e+00  -1.6370256e+01  -5.6477685e+00
   2.0039849e+01  -2.7685307e+01   1.0000000e+02  -8.0102611e+00  -1.5330968e+01  -6.7571860e+00
   2.0152735e+01  -2.7765810e+01   1.0000000e+02  -9.0801100e+00  -1.4456437e+01  -7.5773166e+00
   2.0269062e+01  -2.7842477e+01   1.0000000e+02  -1.0058585e+01  -1.3882430e+01  -8.2259891e+00
   2.0388669e+01  -2.7915196e+01   1.0000000e+02  -1.0829293e+01  -1.3647002e+01  -8.9138261e+00
   2.0511386e+01  -2.7983857e+01   1.0000000e+02  -1.1318293e+01  -1.3656537e+01  -9.8869814e+00
   2.0637038e+01  -2.8048361e+01   1.0000000e+02  -1.1519285e+01  -1.3692084e+01  -1.1336826e+01
   2.0765445e+01  -2.8108612e+01   1.0000000e+02  -1.1493581e+01  -1.3466000e+01  -1.3308829e+01
   2.0896422e+01  -2.8164520e+01   1.0000000e+02  -1.1338533e+01  -1.2716864e+01  -1.5655126e+01
   2.1029779e+01  -2.8216002e+01   1.0000000e+02  -1.1135601e+01  -1.1307369e+01  -1.8064897e+01
   2.1696587e+01  -2.8530550e+01   1.0000000e+02  -1.0362114e+01  -1.4343739e+00  -2.2927611e+01
   2.1840388e+01  -2.8554221e+01   1.0000000e+02  -9.0113143e+00   7.9567405e-01  -2.3159107e+01
   2.1985113e+01  -2.8573223e+01   1.0000000e+02  -7.5474565e+00   3.3235298e+00  -2.3366495e+01
   2.2130560e+01  -2.8587531e+01   1.0000000e+02  -6.1845544e+00   6.4339412e+00  -2.3350857e+01
   2.2276525e+01  -2.8597124e+01   1.0000000e+02  -5.1475389e+00   1.0241861e+01  -2.2682151e+01
   2.2422804e+01  -2.8601989e+01   1.0000000e+02  -4.6063669e+00   1.4533484e+01  -2.0875858e+01
   2.2569191e+01  -2.8602118e+01   1.0000000e+02  -4.6117433e+00   1.8780321e+01  -1.7668315e+01
   2.2715481e+01  -2.8597512e+01   1.0000000e+02  -5.0766945e+00   2.2366487e+01  -1.3191422e+01
   2.2861468e+01  -2.8588178e+01   1.0000000e+02  -5.8207487e+00   2.4862576e+01  -7.8943383e+00
   2.3006949e+01  -2.8574127e+01   1.0000000e+02  -6.6493725e+00   2.6125647e+01  -2.3039091e+00
   2.3151719e+01  -2.8555381e+01   1.0000000e+02  -7.4253492e+00   2.6211483e+01   3.1403071e+00
   2.3295575e+01  -2.8531965e+01   1.0000000e+02  -8.1005950e+00   2.5273124e+01   8.0964358e+00
   2.3438319e+01  -2.8503913e+01   1.0000000e+02  -8.6965846e+00   2.3540692e+01   1.2293265e+01
   2.3579750e+01  -2.8471263e+01   1.0000000e+02  -9.2512776e+00   2.1319615e+01   1.5556139e+01
   2.3719672e+01  -2.8434062e+01   1.0000000e+02  -9.7744509e+00   1.8942081e+01   1.7851255e+01
   2.3857891e+01  -2.8392362e+01   1.0000000e+02  -1.0241304e+01   1.6693364e+01   1.9286335e+01
   2.3994218e+01  -2.8346222e+01   1.0000000e+02  -1.0615822e+01   1.4762666e+01   2.0064728e+01
   2.4128466e+01  -2.8295705e+01   1.0000000e+02  -1.0875359e+01   1.3232273e+01   2.0425407e+01
   2.4260450e+01  -2.8240882e+01   1.0000000e+02  -1.1018992e+01   1.2090008e+01   2.0591005e+01
   2.4389991e+01  -2.8181830e+01   1.0000000e+02  -1.1062321e+01   1.1254822e+01   2.0729294e+01
   2.4516915e+01  -2.8118631e+01   1.0000000e+02  -1.1029929e+01   1.0612888e+01   2.0933669e+01
   2.4641050e+01  -2.8051372e+01   1.0000000e+02  -1.0953008e+01   1.0053932e+01   2.1226593e+01
   2.4762232e+01  -2.7980147e+01   1.0000000e+02  -1.0870622e+01   9.4928572e+00   2.1577957e+01
   2.4880300e+01  -2.7905054e+01   1.0000000e+02  -1.0827767e+01   8.8724492e+00   2.1923183e+01
   2.4995099e+01  -2.7826197e+01   1.0000000e+02  -1.0864684e+01   8.1565037e+00   2.2174262e+01
   2.5106478e+01  -2.7743684e+01   1.0000000e+02  -1.0999711e+01   7.3265544e+00   2.2229743e+01
   2.5214294e+01  -2.7657628e+01   1.0000000e+02  -1.1215238e+01   6.3873930e+00   2.1993486e+01
   2.5318409e+01  -2.7568147e+01   1.0000000e+02  -1.1457912e+01   5.3760242e+00   2.1403114e+01
   2.5418691e+01  -2.7475363e+01   1.0000000e+02  -1.1657064e+01   4.3629953e+00   2.0456690e+01
   2.5515015e+01  -2.7379402e+01   1.0000000e+02  -1.1754164e+01   3.4405902e+00   1.9222067e+01
   2.5607260e+01  -2.7280395e+01   1.0000000e+02  -1.1729794e+01   2.7014292e+00   1.7823359e+01
   2.5695315e+01  -2.7178474e+01   1.0000000e+02  -1.1618672e+01   2.2129600e+00   1.6409766e+01
   2.5779072e+01  -2.7073779e+01   1.0000000e+02  -1.1508433e+01   1.9935130e+00   1.5112154e+01
   2.5858433e+01  -2.6966448e+01   1.0000000e+02  -1.1516413e+01   2.0002016e+00   1.3994409e+01
   2.5933304e+01  -2.6856627e+01   1.0000000e+02  -1.1743811e+01   2.1401106e+00   1.3021545e+01
   2.6003599e+01  -2.6744461e+01   1.0000000e+02  -1.2224977e+01   2.3029096e+00   1.2069697e+01
   2.6069240e+01  -2.6630099e+01   1.0000000e+02  -1.2901238e+01   2.3970518e+00   1.0980026e+01
   2.6130153e+01  -2.6513695e+01   1.0000000e+02  -1.3634872e+01   2.3709969e+00   9.6273264e+00
   2.6186274e+01  -2.6395400e+01   1.0000000e+02  -1.4252639e+01   2.2147325e+00   7.9685648e+00
   2.6237544e+01  -2.6275372e+01   1.0000000e+02  -1.4595470e+01   1.9491256e+00   6.0569320e+00
   2.6283911e+01  -2.6153767e+01   1.0000000e+02  -1.4557471e+01   1.6118081e+00   4.0269727e+00
   2.6325330e+01  -2.6030745e+01   1.0000000e+02  -1.4109389e+01   1.2435470e+00   2.0627992e+00
   2.6361764e+01  -2.5906467e+01   1.0000000e+02  -1.3306410e+01   8.7604929e-01   3.5403279e-01
   2.6393181e+01  -2.5781093e+01   1.0000000e+02  -1.2272758e+01   5.2382057e-01  -9.5651552e-01
   2.6419557e+01  -2.5654786e+01   1.0000000e+02  -1.1155447e+01   1.8498026e-01  -1.8132039e+00
   2.6440874e+01  -2.5527710e+01   1.0000000e+02  -1.0063871e+01  -1.4765428e-01  -2.2453397e+00
   2.6457122e+01  -2.5400027e+01   1.0000000e+02  -9.0373121e+00  -4.7140293e-01  -2.3172649e+00
   2.6468295e+01  -2.5271901e+01   1.0000000e+02  -8.0697713e+00  -7.6448348e-01  -2.0678325e+00
   2.6474395e+01  -2.5143497e+01   1.0000000e+02  -7.1766932e+00  -9.8947062e-01  -1.4906160e+00
   2.6475432e+01  -2.5014978e+01   1.0000000e+02  -6.4502303e+00  -1.1074141e+00  -5.7525570e-01
   2.6471419e+01  -2.4886507e+01   1.0000000e+02  -6.0552111e+00  -1.0907917e+00   6.2096987e-01
   2.6462377e+01  -2.4758246e+01   1.0000000e+02  -6.1649196e+00  -9.2446891e-01   1.9263568e+00
   2.6448333e+01  -2.4630359e+01   1.0000000e+02  -6.8776216e+00  -5.9776578e-01   3.0647725e+00
   2.6429320e+01  -2.4503005e+01   1.0000000e+02  -8.1571859e+00  -1.0172901e-01   3.7158105e+00
   2.6405378e+01  -2.4376344e+01   1.0000000e+02  -9.8194927e+00   5.5977236e-01   3.5989401e+00
   2.6376549e+01  -2.4250535e+01   1.0000000e+02  -1.1567211e+01   1.3522314e+00   2.5526512e+00
   2.6342885e+01  -2.4125735e+01   1.0000000e+02  -1.3058654e+01   2.2017109e+00   5.8022268e-01
   2.6304441e+01  -2.4002099e+01   1.0000000e+02  -1.3981217e+01   3.0045052e+00  -2.1510004e+00
   2.6261278e+01  -2.3879780e+01   1.0000000e+02  -1.4105068e+01   3.6502616e+00  -5.3431484e+00
   2.6213463e+01  -2.3758931e+01   1.0000000e+02  -1.3320327e+01   4.0491509e+00  -8.6121841e+00
   2.6161066e+01  -2.3639699e+01   1.0000000e+02  -1.1671387e+01   4.1563185e+00  -1.1546802e+01
   2.6104165e+01  -2.3522232e+01   1.0000000e+02  -9.3713494e+00   3.9844655e+00  -1.3797783e+01
   2.6042840e+01  -2.3406674e+01   1.0000000e+02  -6.7561354e+00   3.5937178e+00  -1.5175317e+01
   2.5977179e+01  -2.3293167e+01   1.0000000e+02  -4.1792514e+00   3.0617408e+00  -1.5690154e+01
   2.5907270e+01  -2.3181849e+01   1.0000000e+02  -1.9090119e+00   2.4538491e+00  -1.5508564e+01
   2.5833210e+01  -2.3072856e+01   1.0000000e+02  -8.5969511e-02   1.8092274e+00  -1.4862497e+01
   2.5755099e+01  -2.2966321e+01   1.0000000e+02   1.2617300e+00   1.1428538e+00  -1.3976990e+01
   2.5673039e+01  -2.2862374e+01   1.0000000e+02   2.1835725e+00   4.5349869e-01  -1.3036479e+01
   2.5587139e+01  -2.2761140e+01   1.0000000e+02   2.7770279e+00  -2.6941628e-01  -1.2173200e+01
   2.5497509e+01  -2.2662741e+01   1.0000000e+02   3.1624583e+00  -1.0408119e+00  -1.1460912e+01
   2.5404267e+01  -2.2567298e+01   1.0000000e+02   3.4586789e+00  -1.8747623e+00  -1.0913431e+01
   2.5307530e+01  -2.2474924e+01   1.0000000e+02   3.7627754e+00  -2.7790341e+00  -1.0492564e+01
   2.5207421e+01  -2.2385731e+01   1.0000000e+02   4.1387689e+00  -3.7510882e+00  -1.0124303e+01
   2.5104067e+01  -2.2299826e+01   1.0000000e+02   4.6146177e+00  -4.7760315e+00  -9.7161524e+00
   2.4997595e+01  -2.2217313e+01   1.0000000e+02   5.1820544e+00  -5.8222781e+00  -9.1723732e+00
   2.4888140e+01  -2.2138290e+01   1.0000000e+02   5.7966518e+00  -6.8336414e+00  -8.4131027e+00
   2.4775834e+01  -2.2062851e+01   1.0000000e+02   6.3831928e+00  -7.7268333e+00  -7.4013100e+00
   2.4660818e+01  -2.1991088e+01   1.0000000e+02   6.8506210e+00  -8.4045376e+00  -6.1674949e+00
   2.4543230e+01  -2.1923085e+01   1.0000000e+02   7.1137190e+00  -8.7831834e+00  -4.8171042e+00
   2.4423215e+01  -2.1858924e+01   1.0000000e+02   7.1147742e+00  -8.8249069e+00  -3.5150251e+00
   2.4300916e+01  -2.1798682e+01   1.0000000e+02   6.8400585e+00  -8.5639073e+00  -2.4479355e+00
   2.4176483e+01  -2.1742429e+01   1.0000000e+02   6.3239891e+00  -8.1159808e+00  -1.7694499e+00
   2.4050064e+01  -2.1690233e+01   1.0000000e+02   5.6349835e+00  -7.6595053e+00  -1.5448375e+00
   2.3921812e+01  -2.1642156e+01   1.0000000e+02   4.8480919e+00  -7.3876660e+00  -1.7207974e+00
   2.3791878e+01  -2.1598255e+01   1.0000000e+02   4.0184879e+00  -7.4475045e+00  -2.1368209e+00
   2.3660419e+01  -2.1558582e+01   1.0000000e+02   3.1672235e+00  -7.8911236e+00  -2.5775918e+00
   2.3527589e+01  -2.1523184e+01   1.0000000e+02   2.2832044e+00  -8.6648451e+00  -2.8474063e+00
   2.3393548e+01  -2.1492103e+01   1.0000000e+02   1.3388731e+00  -9.6443370e+00  -2.8313135e+00
   2.3258453e+01  -2.1465376e+01   1.0000000e+02   3.1171055e-01  -1.0695073e+01  -2.5124635e+00
   2.3122465e+01  -2.1443035e+01   1.0000000e+02  -7.9784286e-01  -1.1721352e+01  -1.9424492e+00
   2.2985743e+01  -2.1425105e+01   1.0000000e+02  -1.9605789e+00  -1.2679386e+01  -1.1921280e+00
   2.2848449e+01  -2.1411609e+01   1.0000000e+02  -3.1265192e+00  -1.3559998e+01  -3.1843730e-01
   2.2710745e+01  -2.1402561e+01   1.0000000e+02  -4.2398225e+00  -1.4368063e+01   6.3973943e-01
   2.2572793e+01  -2.1397974e+01   1.0000000e+02  -5.2507852e+00  -1.5118191e+01   1.6535294e+00
   2.2434756e+01  -2.1397852e+01   1.0000000e+02  -6.1217593e+00  -1.5839807e+01   2.7063761e+00
   2.2296795e+01  -2.1402195e+01   1.0000000e+02  -6.8299515e+00  -1.6572282e+01   3.8082096e+00
   2.2159073e+01  -2.1410999e+01   1.0000000e+02  -7.3693730e+00  -1.7343443e+01   5.0027724e+00
   2.2021753e+01  -2.1424252e+01   1.0000000e+02  -7.7507464e+00  -1.8146097e+01   6.3546467e+00
   2.1884995e+01  -2.1441940e+01   1.0000000e+02  -7.9982707e+00  -1.8930294e+01   7.9242257e+00
   2.1748963e+01  -2.1464041e+01   1.0000000e+02  -8.1448835e+00  -1.9612130e+01   9.7490190e+00
   2.1613815e+01  -2.1490528e+01   1.0000000e+02  -8.2270729e+00  -2.0085809e+01   1.1838263e+01
   2.1479712e+01  -2.1521372e+01   1.0000000e+02  -8.2783583e+00  -2.0231453e+01   1.4168941e+01
   2.1346812e+01  -2.1556535e+01   1.0000000e+02  -8.3213496e+00  -1.9928764e+01   1.6673712e+01
   2.1215274e+01  -2.1595975e+01   1.0000000e+02  -8.3609263e+00  -1.9088326e+01   1.9230883e+01
   2.1085253e+01  -2.1639647e+01   1.0000000e+02  -8.3829704e+00  -1.7691746e+01   2.1677516e+01
   2.0956904e+01  -2.1687497e+01   1.0000000e+02  -8.3606837e+00  -1.5812803e+01   2.3850624e+01
   2.0830381e+01  -2.1739469e+01   1.0000000e+02  -8.2661058e+00  -1.3600239e+01   2.5635371e+01
   2.0705835e+01  -2.1795501e+01   1.0000000e+02  -8.0812946e+00  -1.1232540e+01   2.6991433e+01
   2.0583416e+01  -2.1855528e+01   1.0000000e+02  -7.8038068e+00  -8.8728241e+00   2.7949567e+01
   2.0463272e+01  -2.1919476e+01   1.0000000e+02  -7.4440036e+00  -6.6420082e+00   2.8590487e+01
   2.0345548e+01  -2.1987271e+01   1.0000000e+02  -7.0148585e+00  -4.6103554e+00   2.9020261e+01
   2.0230387e+01  -2.2058831e+01   1.0000000e+02  -6.5184760e+00  -2.8009727e+00   2.9345738e+01
   2.0117930e+01  -2.2134070e+01   1.0000000e+02  -5.9361218e+00  -1.2020958e+00   2.9651325e+01
   2.0008315e+01  -2.2212900e+01   1.0000000e+02  -5.2268802e+00   2.1435620e-01   2.9981616e+01
   1.9901677e+01  -2.2295225e+01   1.0000000e+02  -4.3355160e+00   1.4743645e+00   3.0334060e+01
   1.9798149e+01  -2.2380947e+01   1.0000000e+02  -3.2079329e+00   2.5892003e+00   3.0661286e+01
   1.9697859e+01  -2.2469962e+01   1.0000000e+02  -1.8118817e+00   3.5493000e+00   3.0881879e+01
   1.9600935e+01  -2.2562165e+01   1.0000000e+02  -1.5582612e-01   4.3243671e+00   3.0901833e+01
   1.9507498e+01  -2.2657444e+01   1.0000000e+02   1.7041551e+00   4.8714503e+00   3.0642208e+01
   1.9417668e+01  -2.2755684e+01   1.0000000e+02   3.6745478e+00   5.1496180e+00   3.0061855e+01
   1.9331561e+01  -2.2856766e+01   1.0000000e+02   5.6451984e+00   5.1346666e+00   2.9164262e+01
   1.9249288e+01  -2.2960568e+01   1.0000000e+02   7.5093609e+00   4.8267474e+00   2.7989996e+01
   1.9170958e+01  -2.3066965e+01   1.0000000e+02   9.1761614e+00   4.2497594e+00   2.6603860e+01
   1.9096674e+01  -2.3175827e+01   1.0000000e+02   1.0575785e+01   3.4463774e+00   2.5083949e+01
   1.9026536e+01  -2.3287021e+01   1.0000000e+02   1.1661106e+01   2.4721200e+00   2.3514740e+01
   1.8960640e+01  -2.3400412e+01   1.0000000e+02   1.2409236e+01   1.3893609e+00   2.1983166e+01
   1.8899076e+01  -2.3515861e+01   1.0000000e+02   1.2826113e+01   2.6116769e-01   2.0575256e+01
   1.8841930e+01  -2.3633227e+01   1.0000000e+02   1.2953859e+01  -8.5512982e-01   1.9368141e+01
   1.8789285e+01  -2.3752366e+01   1.0000000e+02   1.2874138e+01  -1.9151859e+00   1.8413939e+01
   1.8741217e+01  -2.3873132e+01   1.0000000e+02   1.2698763e+01  -2.8960808e+00   1.7720195e+01
   1.8697798e+01  -2.3995374e+01   1.0000000e+02   1.2545581e+01  -3.8033114e+00   1.7238729e+01
   1.8659095e+01  -2.4118942e+01   1.0000000e+02   1.2507315e+01  -4.6711037e+00   1.6871674e+01
   1.8625168e+01  -2.4243682e+01   1.0000000e+02   1.2625313e+01  -5.5523696e+00   1.6494326e+01
   1.8596073e+01  -2.4369440e+01   1.0000000e+02   1.2877706e+01  -6.5002386e+00   1.5987017e+01
   1.8571862e+01  -2.4496058e+01   1.0000000e+02   1.3186248e+01  -7.5470150e+00   1.5266075e+01
   1.8552579e+01  -2.4623378e+01   1.0000000e+02   1.3440729e+01  -8.6893012e+00   1.4303993e+01
   1.8538262e+01  -2.4751241e+01   1.0000000e+02   1.3533679e+01  -9.8869401e+00   1.3131543e+01
   1.8528946e+01  -2.4879485e+01   1.0000000e+02   1.3393209e+01  -1.1076653e+01   1.1820197e+01
   1.8524657e+01  -2.5007949e+01   1.0000000e+02   1.3000880e+01  -1.2191932e+01   1.0450318e+01
   1.8525417e+01  -2.5136470e+01   1.0000000e+02   1.2385520e+01  -1.3178140e+01   9.0770586e+00
   1.8531240e+01  -2.5264884e+01   1.0000000e+02   1.1593244e+01  -1.3997661e+01   7.7109655e+00
   1.8542136e+01  -2.5393029e+01   1.0000000e+02   1.0649028e+01  -1.4627696e+01   6.3273986e+00
   1.8558106e+01  -2.5520741e+01   1.0000000e+02   9.5347369e+00  -1.5055348e+01   4.9035879e+00
   1.8579146e+01  -2.5647854e+01   1.0000000e+02   8.2001518e+00  -1.5274480e+01   3.4613861e+00
   1.8605246e+01  -2.5774207e+01   1.0000000e+02   6.6007616e+00  -1.5286542e+01   2.0885869e+00
   1.8636388e+01  -2.5899636e+01   1.0000000e+02   4.7386612e+00  -1.5105462e+01   9.2610947e-01
   1.8672548e+01  -2.6023979e+01   1.0000000e+02   2.6838737e+00  -1.4764706e+01   1.2951723e-01
   1.8713696e+01  -2.6147074e+01   1.0000000e+02   5.6973551e-01  -1.4323819e+01  -1.7634434e-01
   1.8759793e+01  -2.6268760e+01   1.0000000e+02  -1.4317589e+00  -1.3870592e+01   6.3711115e-02
   1.8810796e+01  -2.6388879e+01   1.0000000e+02  -3.1469225e+00  -1.3513236e+01   8.0989874e-01
   1.8866653e+01  -2.6507272e+01   1.0000000e+02  -4.4418451e+00  -1.3358866e+01   1.9246334e+00
   1.8927306e+01  -2.6623784e+01   1.0000000e+02  -5.2551981e+00  -1.3483577e+01   3.1994775e+00
   1.8992690e+01  -2.6738261e+01   1.0000000e+02  -5.6058786e+00  -1.3907675e+01   4.4038899e+00
   1.9062733e+01  -2.6850551e+01   1.0000000e+02  -5.5737219e+00  -1.4587871e+01   5.3313613e+00
   1.9137356e+01  -2.6960505e+01   1.0000000e+02  -5.2710979e+00  -1.5427388e+01   5.8244442e+00
   1.9216473e+01  -2.7067975e+01   1.0000000e+02  -4.8241446e+00  -1.6295517e+01   5.7826674e+00
   1.9299993e+01  -2.7172819e+01   1.0000000e+02  -4.3651381e+00  -1.7048704e+01   5.1689518e+00
   1.9387815e+01  -2.7274895e+01   1.0000000e+02  -4.0244147e+00  -1.7552371e+01   4.0199751e+00
   1.9479834e+01  -2.7374065e+01   1.0000000e+02  -3.9143860e+00  -1.7705383e+01   2.4493919e+00
   1.9575937e+01  -2.7470196e+01   1.0000000e+02  -4.1116437e+00  -1.7462588e+01   6.3210634e-01
   1.9676006e+01  -2.7563157e+01   1.0000000e+02  -4.6469500e+00  -1.6847572e+01  -1.2276792e+00
   1.9779915e+01  -2.7652821e+01   1.0000000e+02  -5.5037828e+00  -1.5952523e+01  -2.9320124e+00
   1.9887532e+01  -2.7739068e+01   1.0000000e+02  -6.6189170e+00  -1.4928128e+01  -4.3232936e+00
   1.9998720e+01  -2.7821778e+01   1.0000000e+02  -7.8833720e+00  -1.3963609e+01  -5.3217025e+00
   2.0113335e+01  -2.7900838e+01   1.0000000e+02  -9.1531675e+00  -1.3249757e+01  -5.9636899e+00
   2.0231228e+01  -2.7976139e+01   1.0000000e+02  -1.0278669e+01  -1.2923622e+01  -6.4199680e+00
   2.0352244e+01  -2.8047578e+01   1.0000000e+02  -1.1146798e+01  -1.3009920e+01  -6.9672557e+00
   2.0476222e+01  -2.8115056e+01   1.0000000e+02  -1.1718087e+01  -1.3385924e+01  -7.9069393e+00
   2.0602998e+01  -2.8178480e+01   1.0000000e+02  -1.2037684e+01  -1.3794210e+01  -9.4513656e+00
   2.0732401e+01  -2.8237761e+01   1.0000000e+02  -1.2208731e+01  -1.3911949e+01  -1.1623464e+01
   2.0864256e+01  -2.8292817e+01   1.0000000e+02  -1.2336191e+01  -1.3459398e+01  -1.4222208e+01
   2.0998384e+01  -2.8343571e+01   1.0000000e+02  -1.2466958e+01  -1.2304253e+01  -1.6883380e+01
   2.1134602e+01  -2.8389953e+01   1.0000000e+02  -1.2558512e+01  -1.0509555e+01  -1.9217108e+01
   2.1272723e+01  -2.8431898e+01   1.0000000e+02  -1.2496085e+01  -8.2963346e+00  -2.0957070e+01
   2.1412557e+01  -2.8469346e+01   1.0000000e+02  -1.2149807e+01  -5.9374316e+00  -2.2046827e+01
   2.1553910e+01  -2.8502246e+01   1.0000000e+02  -1.1437849e+01  -3.6347332e+00  -2.2624938e+01
   2.2269128e+01  -2.8725255e+01   1.0000000e+02  -6.4972320e+00   8.9762891e+00  -2.4397246e+01
   2.2415792e+01  -2.8730185e+01   1.0000000e+02  -5.5579937e+00   1.3836637e+01  -2.2723807e+01
   2.2562566e+01  -2.8730523e+01   1.0000000e+02  -5.0994943e+00   1.8652657e+01  -1.9335943e+01
   2.2709259e+01  -2.8726270e+01   1.0000000e+02  -5.0895992e+00   2.2681658e+01  -1.4426622e+01
   2.2855675e+01  -2.8717431e+01   1.0000000e+02  -5.4059585e+00   2.5418048e+01  -8.5811801e+00
   2.3001624e+01  -2.8704018e+01   1.0000000e+02  -5.8859265e+00   2.6721709e+01  -2.4776065e+00
   2.3146912e+01  -2.8686049e+01   1.0000000e+02  -6.3901967e+00   2.6717244e+01   3.3422865e+00
   2.3291350e+01  -2.8663546e+01   1.0000000e+02  -6.8503524e+00   2.5646552e+01   8.5190126e+00
   2.3434748e+01  -2.8636541e+01   1.0000000e+02  -7.2713883e+00   2.3796842e+01   1.2833897e+01
   2.3576918e+01  -2.8605068e+01   1.0000000e+02  -7.6902496e+00   2.1477382e+01   1.6181997e+01
   2.3717676e+01  -2.8569169e+01   1.0000000e+02  -8.1260011e+00   1.8992082e+01   1.8567155e+01
   2.3856838e+01  -2.8528892e+01   1.0000000e+02  -8.5590491e+00   1.6602609e+01   2.0093250e+01
   2.3994225e+01  -2.8484289e+01   1.0000000e+02  -8.9448312e+00   1.4497493e+01   2.0941340e+01
   2.4129659e+01  -2.8435419e+01   1.0000000e+02  -9.2404291e+00   1.2774795e+01   2.1334668e+01
   2.4262966e+01  -2.8382346e+01   1.0000000e+02  -9.4225094e+00   1.1438951e+01   2.1495170e+01
   2.4393977e+01  -2.8325140e+01   1.0000000e+02  -9.4897338e+00   1.0416811e+01   2.1598638e+01
   2.4522525e+01  -2.8263874e+01   1.0000000e+02  -9.4558803e+00   9.5951208e+00   2.1745643e+01
   2.4648447e+01  -2.8198630e+01   1.0000000e+02  -9.3442065e+00   8.8652396e+00   2.1963161e+01
   2.4771586e+01  -2.8129492e+01   1.0000000e+02  -9.1890676e+00   8.1519381e+00   2.2230150e+01
   2.4891788e+01  -2.8056549e+01   1.0000000e+02  -9.0406898e+00   7.4159530e+00   2.2503579e+01
   2.5008905e+01  -2.7979897e+01   1.0000000e+02  -8.9637860e+00   6.6399044e+00   2.2727572e+01
   2.5122793e+01  -2.7899633e+01   1.0000000e+02  -9.0229002e+00   5.8148571e+00   2.2828061e+01
   2.5233313e+01  -2.7815863e+01   1.0000000e+02  -9.2555366e+00   4.9383888e+00   2.2710158e+01
   2.5340333e+01  -2.7728693e+01   1.0000000e+02  -9.6464871e+00   4.0242457e+00   2.2274610e+01
   2.5443724e+01  -2.7638234e+01   1.0000000e+02  -1.0121629e+01   3.1134090e+00   2.1454067e+01
   2.5543365e+01  -2.7544604e+01   1.0000000e+02  -1.0570541e+01   2.2748718e+00   2.0250864e+01
   2.5639139e+01  -2.7447920e+01   1.0000000e+02  -1.0888677e+01   1.5926776e+00   1.8753608e+01
   2.5730936e+01  -2.7348306e+01   1.0000000e+02  -1.1018839e+01   1.1434717e+00   1.7123768e+01
   2.5818651e+01  -2.7245887e+01   1.0000000e+02  -1.0978039e+01   9.7104101e-01   1.5556791e+01
   2.5902185e+01  -2.7140794e+01   1.0000000e+02  -1.0862680e+01   1.0647859e+00   1.4224244e+01
   2.5981446e+01  -2.7033159e+01   1.0000000e+02  -1.0824034e+01   1.3540701e+00   1.3208883e+01
   2.6056348e+01  -2.6923116e+01   1.0000000e+02  -1.1011868e+01   1.7278861e+00   1.2462351e+01
   2.6126811e+01  -2.6810803e+01   1.0000000e+02  -1.1507307e+01   2.0733824e+00   1.1817504e+01
   2.6192761e+01  -2.6696360e+01   1.0000000e+02  -1.2282044e+01   2.3114524e+00   1.1055802e+01
   2.6254129e+01  -2.6579929e+01   1.0000000e+02  -1.3205388e+01   2.4110834e+00   9.9920892e+00
   2.6310856e+01  -2.6461654e+01   1.0000000e+02  -1.4088661e+01   2.3823311e+00   8.5346682e+00
   2.6362886e+01  -2.6341682e+01   1.0000000e+02  -1.4740783e+01   2.2594533e+00   6.7050078e+00
   2.6410170e+01  -2.6220159e+01   1.0000000e+02  -1.5015243e+01   2.0835127e+00   4.6250502e+00
   2.6452665e+01  -2.6097235e+01   1.0000000e+02  -1.4841444e+01   1.8873726e+00   2.4857691e+00
   2.6490336e+01  -2.5973060e+01   1.0000000e+02  -1.4240523e+01   1.6839749e+00   5.0274691e-01
   2.6523153e+01  -2.5847785e+01   1.0000000e+02  -1.3320314e+01   1.4608914e+00  -1.1400598e+00
   2.6551090e+01  -2.5721561e+01   1.0000000e+02  -1.2237263e+01   1.1857821e+00  -2.3441243e+00
   2.6574131e+01  -2.5594542e+01   1.0000000e+02  -1.1130393e+01   8.2376321e-01  -3.1135893e+00
   2.6592264e+01  -2.5466880e+01   1.0000000e+02  -1.0066088e+01   3.5956716e-01  -3.5148320e+00
   2.6605482e+01  -2.5338729e+01   1.0000000e+02  -9.0383507e+00  -1.8667081e-01  -3.6029678e+00
   2.6613785e+01  -2.5210243e+01   1.0000000e+02  -8.0309890e+00  -7.5913179e-01  -3.3730583e+00
   2.6617180e+01  -2.5081574e+01   1.0000000e+02  -7.0961910e+00  -1.2830196e+00  -2.7808422e+00
   2.6615678e+01  -2.4952875e+01   1.0000000e+02  -6.3822373e+00  -1.6882172e+00  -1.8214582e+00
   2.6609296e+01  -2.4824299e+01   1.0000000e+02  -6.0827569e+00  -1.9232003e+00  -6.0178677e-01
   2.6598056e+01  -2.4695999e+01   1.0000000e+02  -6.3458158e+00  -1.9519027e+00   6.4939244e-01
   2.6581987e+01  -2.4568124e+01   1.0000000e+02  -7.2025235e+00  -1.7444221e+00   1.6334356e+00
   2.6561123e+01  -2.4440827e+01   1.0000000e+02  -8.5443025e+00  -1.2784686e+00   2.0595885e+00
   2.6535501e+01  -2.4314254e+01   1.0000000e+02  -1.0144780e+01  -5.5640632e-01   1.7158142e+00
   2.6505167e+01  -2.4188555e+01   1.0000000e+02  -1.1709434e+01   3.7413984e-01   5.1539310e-01
   2.6470168e+01  -2.4063876e+01   1.0000000e+02  -1.2934673e+01   1.4142819e+00  -1.4870196e+00
   2.6430559e+01  -2.3940361e+01   1.0000000e+02  -1.3558685e+01   2.4292812e+00  -4.1065458e+00
   2.6386398e+01  -2.3818154e+01   1.0000000e+02  -1.3398754e+01   3.2783582e+00  -7.0528179e+00
   2.6337749e+01  -2.3697395e+01   1.0000000e+02  -1.2385338e+01   3.8486562e+00  -9.9626495e+00
   2.6284679e+01  -2.3578225e+01   1.0000000e+02  -1.0597670e+01   4.0856150e+00  -1.2456100e+01
   2.6227262e+01  -2.3460779e+01   1.0000000e+02  -8.2723756e+00   4.0066991e+00  -1.4229122e+01
   2.6165574e+01  -2.3345193e+01   1.0000000e+02  -5.7470143e+00   3.6848430e+00  -1.5145733e+01
   2.6099696e+01  -2.3231599e+01   1.0000000e+02  -3.3521694e+00   3.2090917e+00  -1.5262780e+01
   2.6029713e+01  -2.3120126e+01   1.0000000e+02  -1.3209789e+00   2.6493628e+00  -1.4770280e+01
   2.5955714e+01  -2.3010902e+01   1.0000000e+02   2.3755211e-01   2.0430580e+00  -1.3902678e+01
   2.5877794e+01  -2.2904050e+01   1.0000000e+02   1.3180366e+00   1.4002406e+00  -1.2877244e+01
   2.5796047e+01  -2.2799692e+01   1.0000000e+02   1.9882174e+00   7.1593329e-01  -1.1867410e+01
   2.5710576e+01  -2.2697946e+01   1.0000000e+02   2.3623334e+00  -1.8933318e-02  -1.0991740e+01
   2.5621484e+01  -2.2598927e+01   1.0000000e+02   2.5737169e+00  -8.1162109e-01  -1.0308529e+01
   2.5528878e+01  -2.2502747e+01   1.0000000e+02   2.7467913e+00  -1.6663733e+00  -9.8176188e+00
   2.5432870e+01  -2.2409513e+01   1.0000000e+02   2.9757697e+00  -2.5846890e+00  -9.4706376e+00
   2.5333573e+01  -2.2319331e+01   1.0000000e+02   3.3149922e+00  -3.5641653e+00  -9.1873430e+00
   2.5231104e+01  -2.2232302e+01   1.0000000e+02   3.7799131e+00  -4.5957602e+00  -8.8729649e+00
   2.5125583e+01  -2.2148524e+01   1.0000000e+02   4.3530268e+00  -5.6583367e+00  -8.4322711e+00
   2.5017132e+01  -2.2068090e+01   1.0000000e+02   4.9890552e+00  -6.7091742e+00  -7.7830060e+00
   2.4905878e+01  -2.1991089e+01   1.0000000e+02   5.6199847e+00  -7.6758708e+00  -6.8751760e+00
   2.4791947e+01  -2.1917609e+01   1.0000000e+02   6.1645989e+00  -8.4607876e+00  -5.7141262e+00
   2.4675470e+01  -2.1847731e+01   1.0000000e+02   6.5438834e+00  -8.9628404e+00  -4.3751873e+00
   2.4556580e+01  -2.1781533e+01   1.0000000e+02   6.6988525e+00  -9.1097467e+00  -2.9992748e+00
   2.4435411e+01  -2.1719088e+01   1.0000000e+02   6.6050827e+00  -8.8897741e+00  -1.7667654e+00
   2.4312100e+01  -2.1660467e+01   1.0000000e+02   6.2784366e+00  -8.3722763e+00  -8.5297212e-01
   2.4186786e+01  -2.1605733e+01   1.0000000e+02   5.7674667e+00  -7.7050022e+00  -3.7597549e-01
   2.4059608e+01  -2.1554947e+01   1.0000000e+02   5.1343355e+00  -7.0825699e+00  -3.5700288e-01
   2.3930710e+01  -2.1508167e+01   1.0000000e+02   4.4327664e+00  -6.6943692e+00  -7.0908278e-01
   2.3800234e+01  -2.1465444e+01   1.0000000e+02   3.6911654e+00  -6.6685453e+00  -1.2597811e+00
   2.3668325e+01  -2.1426825e+01   1.0000000e+02   2.9067087e+00  -7.0340744e+00  -1.8053697e+00
   2.3535131e+01  -2.1392352e+01   1.0000000e+02   2.0533388e+00  -7.7214417e+00  -2.1785282e+00
   2.3400797e+01  -2.1362065e+01   1.0000000e+02   1.1005119e+00  -8.6049416e+00  -2.2975260e+00
   2.3265473e+01  -2.1335996e+01   1.0000000e+02   3.3841602e-02  -9.5631866e+00  -2.1703382e+00
   2.3129308e+01  -2.1314174e+01   1.0000000e+02  -1.1324263e+00  -1.0521583e+01  -1.8554208e+00
   2.2992451e+01  -2.1296624e+01   1.0000000e+02  -2.3567016e+00  -1.1454713e+01  -1.4112148e+00
   2.2855053e+01  -2.1283364e+01   1.0000000e+02  -3.5823733e+00  -1.2360984e+01  -8.7070459e-01
   2.2717265e+01  -2.1274410e+01   1.0000000e+02  -4.7519100e+00  -1.3241817e+01  -2.4749709e-01
   2.2579239e+01  -2.1269771e+01   1.0000000e+02  -5.8155309e+00  -1.4101932e+01   4.5090295e-01
   2.2441126e+01  -2.1269452e+01   1.0000000e+02  -6.7349662e+00  -1.4958213e+01   1.2253004e+00
   2.2303077e+01  -2.1273454e+01   1.0000000e+02  -7.4863109e+00  -1.5835883e+01   2.0985316e+00
   2.2165245e+01  -2.1281773e+01   1.0000000e+02  -8.0620953e+00  -1.6748866e+01   3.1205042e+00
   2.2027780e+01  -2.1294398e+01   1.0000000e+02  -8.4695284e+00  -1.7679670e+01   4.3543996e+00
   2.1890834e+01  -2.1311317e+01   1.0000000e+02  -8.7251645e+00  -1.8573252e+01   5.8533017e+00
   2.1754557e+01  -2.1332510e+01   1.0000000e+02  -8.8506339e+00  -1.9344788e+01   7.6429793e+00
   2.1619100e+01  -2.1357955e+01   1.0000000e+02  -8.8715992e+00  -1.9890568e+01   9.7164329e+00
   2.1484611e+01  -2.1387622e+01   1.0000000e+02  -8.8174245e+00  -2.0096252e+01   1.2031302e+01
   2.1351239e+01  -2.1421479e+01   1.0000000e+02  -8.7178573e+00  -1.9850547e+01   1.4502606e+01
   2.1219132e+01  -2.1459490e+01   1.0000000e+02  -8.5965695e+00  -1.9074243e+01   1.6998791e+01
   2.1088435e+01  -2.1501611e+01   1.0000000e+02  -8.4646221e+00  -1.7756570e+01   1.9358310e+01
   2.0959295e+01  -2.1547796e+01   1.0000000e+02  -8.3179641e+00  -1.5973024e+01   2.1429623e+01
   2.0831855e+01  -2.1597994e+01   1.0000000e+02  -8.1415445e+00  -1.3866510e+01   2.3112956e+01
   2.0706257e+01  -2.1652149e+01   1.0000000e+02  -7.9188335e+00  -1.1603133e+01   2.4378195e+01
   2.0582642e+01  -2.1710202e+01   1.0000000e+02  -7.6416308e+00  -9.3307489e+00   2.5255176e+01
   2.0461148e+01  -2.1772087e+01   1.0000000e+02  -7.3145127e+00  -7.1575595e+00   2.5811799e+01
   2.0341913e+01  -2.1837736e+01   1.0000000e+02  -6.9515182e+00  -5.1486766e+00   2.6135108e+01
   2.0225072e+01  -2.1907076e+01   1.0000000e+02  -6.5662800e+00  -3.3310029e+00   2.6317641e+01
   2.0110758e+01  -2.1980030e+01   1.0000000e+02  -6.1602033e+00  -1.7019423e+00   2.6444698e+01
   1.9999101e+01  -2.2056517e+01   1.0000000e+02  -5.7144776e+00  -2.4206383e-01   2.6581496e+01
   1.9890229e+01  -2.2136450e+01   1.0000000e+02  -5.1890638e+00   1.0706722e+00   2.6764204e+01
   1.9784268e+01  -2.2219741e+01   1.0000000e+02  -4.5284697e+00   2.2505678e+00   2.6996200e+01
   1.9681341e+01  -2.2306297e+01   1.0000000e+02  -3.6742756e+00   3.2992862e+00   2.7247114e+01
   1.9581569e+01  -2.2396020e+01   1.0000000e+02  -2.5837942e+00   4.2038445e+00   2.7456784e+01
   1.9485068e+01  -2.2488810e+01   1.0000000e+02  -1.2486085e+00   4.9369865e+00   2.7548976e+01
   1.9391954e+01  -2.2584563e+01   1.0000000e+02   2.9708297e-01   5.4625704e+00   2.7453320e+01
   1.9302337e+01  -2.2683170e+01   1.0000000e+02   1.9833144e+00   5.7464010e+00   2.7124886e+01
   1.9216325e+01  -2.2784521e+01   1.0000000e+02   3.7211715e+00   5.7676139e+00   2.6552425e+01
   1.9134023e+01  -2.2888502e+01   1.0000000e+02   5.4195987e+00   5.5253310e+00   2.5754909e+01
   1.9055532e+01  -2.2994993e+01   1.0000000e+02   6.9965197e+00   5.0394610e+00   2.4773150e+01
   1.8980949e+01  -2.3103875e+01   1.0000000e+02   8.3845771e+00   4.3477975e+00   2.3661593e+01
   1.8910369e+01  -2.3215024e+01   1.0000000e+02   9.5331890e+00   3.5014158e+00   2.2481663e+01
   1.8843880e+01  -2.3328314e+01   1.0000000e+02   1.0409432e+01   2.5587163e+00   2.1297535e+01
   1.8781568e+01  -2.3443614e+01   1.0000000e+02   1.1000818e+01   1.5787821e+00   2.0174471e+01
   1.8723516e+01  -2.3560794e+01   1.0000000e+02   1.1321835e+01   6.1478899e-01   1.9175480e+01
   1.8669801e+01  -2.3679719e+01   1.0000000e+02   1.1419945e+01  -2.9270325e-01   1.8351537e+01
   1.8620496e+01  -2.3800252e+01   1.0000000e+02   1.1373377e+01  -1.1234197e+00   1.7726799e+01
   1.8575669e+01  -2.3922254e+01   1.0000000e+02   1.1276582e+01  -1.8836845e+00   1.7287335e+01
   1.8535385e+01  -2.4045585e+01   1.0000000e+02   1.1217757e+01  -2.6067175e+00   1.6980934e+01
   1.8499702e+01  -2.4170102e+01   1.0000000e+02   1.1256808e+01  -3.3438010e+00   1.6728687e+01
   1.8468677e+01  -2.4295659e+01   1.0000000e+02   1.1411251e+01  -4.1479806e+00   1.6443760e+01
   1.8442357e+01  -2.4422112e+01   1.0000000e+02   1.1653835e+01  -5.0549898e+00   1.6050991e+01
   1.8420789e+01  -2.4549313e+01   1.0000000e+02   1.1921885e+01  -6.0684838e+00   1.5501638e+01
   1.8404011e+01  -2.4677111e+01   1.0000000e+02   1.2134772e+01  -7.1563877e+00   1.4780623e+01
   1.8392057e+01  -2.4805359e+01   1.0000000e+02   1.2216149e+01  -8.2616351e+00   1.3906069e+01
   1.8384957e+01  -2.4933903e+01   1.0000000e+02   1.2116420e+01  -9.3212944e+00   1.2919546e+01
   1.8382734e+01  -2.5062593e+01   1.0000000e+02   1.1826063e+01  -1.0283673e+01   1.1864731e+01
   1.8385406e+01  -2.5191276e+01   1.0000000e+02   1.1367649e+01  -1.1115846e+01   1.0761821e+01
   1.8392985e+01  -2.5319800e+01   1.0000000e+02   1.0766079e+01  -1.1802252e+01   9.5963335e+00
   1.8405478e+01  -2.5448010e+01   1.0000000e+02   1.0016350e+01  -1.2338659e+01   8.3365885e+00
   1.8422886e+01  -2.5575753e+01   1.0000000e+02   9.0739154e+00  -1.2725389e+01   6.9722396e+00
   1.8445204e+01  -2.5702876e+01   1.0000000e+02   7.8766810e+00  -1.2962727e+01   5.5487696e+00
   1.8472420e+01  -2.5829227e+01   1.0000000e+02   6.3847810e+00  -1.3050727e+01   4.1754384e+00
   1.8504519e+01  -2.5954652e+01   1.0000000e+02   4.6139473e+00  -1.2993693e+01   3.0028120e+00
   1.8541475e+01  -2.6078999e+01   1.0000000e+02   2.6461219e+00  -1.2807366e+01   2.1841495e+00
   1.8583262e+01  -2.6202117e+01   1.0000000e+02   6.1745295e-01  -1.2527242e+01   1.8377111e+00
   1.8629842e+01  -2.6323855e+01   1.0000000e+02  -1.3067475e+00  -1.2214251e+01   2.0187167e+00
   1.8681175e+01  -2.6444066e+01   1.0000000e+02  -2.9629808e+00  -1.1952921e+01   2.7013979e+00
   1.8737212e+01  -2.6562600e+01   1.0000000e+02  -4.2217221e+00  -1.1836477e+01   3.7755029e+00
   1.8797900e+01  -2.6679312e+01   1.0000000e+02  -5.0128256e+00  -1.1941311e+01   5.0634758e+00
   1.8863178e+01  -2.6794057e+01   1.0000000e+02  -5.3329692e+00  -1.2302265e+01   6.3542954e+00
   1.8932980e+01  -2.6906693e+01   1.0000000e+02  -5.2356544e+00  -1.2900900e+01   7.4383839e+00
   1.9007232e+01  -2.7017079e+01   1.0000000e+02  -4.8158137e+00  -1.3669742e+01   8.1329045e+00
   1.9085856e+01  -2.7125079e+01   1.0000000e+02  -4.1982833e+00  -1.4506126e+01   8.2997975e+00
   1.9168766e+01  -2.7230555e+01   1.0000000e+02  -3.5287152e+00  -1.5287721e+01   7.8629541e+00
   1.9255870e+01  -2.7333376e+01   1.0000000e+02  -2.9600324e+00  -1.5888607e+01   6.8250187e+00
   1.9347071e+01  -2.7433411e+01   1.0000000e+02  -2.6319713e+00  -1.6199135e+01   5.2749772e+00
   1.9442266e+01  -2.7530535e+01   1.0000000e+02  -2.6495290e+00  -1.6148422e+01   3.3777027e+00
   1.9541343e+01  -2.7624624e+01   1.0000000e+02  -3.0689247e+00  -1.5722558e+01   1.3466559e+00
   1.9644189e+01  -2.7715557e+01   1.0000000e+02  -3.8924233e+00  -1.4973066e+01  -5.9061045e-01
   1.9750682e+01  -2.7803219e+01   1.0000000e+02  -5.0666068e+00  -1.4016184e+01  -2.2277562e+00
   1.9860694e+01  -2.7887498e+01   1.0000000e+02  -6.4822999e+00  -1.3024332e+01  -3.4202893e+00
   1.9974094e+01  -2.7968285e+01   1.0000000e+02  -7.9842929e+00  -1.2202639e+01  -4.1331183e+00
   2.0090744e+01  -2.8045476e+01   1.0000000e+02  -9.4010511e+00  -1.1742093e+01  -4.4777081e+00
   2.0210501e+01  -2.8118972e+01   1.0000000e+02  -1.0591828e+01  -1.1755584e+01  -4.7094535e+00
   2.0333216e+01  -2.8188677e+01   1.0000000e+02  -1.1492752e+01  -1.2220616e+01  -5.1667712e+00
   2.0458737e+01  -2.8254501e+01   1.0000000e+02  -1.2136760e+01  -1.2958195e+01  -6.1609020e+00
   2.0586908e+01  -2.8316358e+01   1.0000000e+02  -1.2630755e+01  -1.3667383e+01  -7.8555636e+00
   2.0717566e+01  -2.8374168e+01   1.0000000e+02  -1.3096661e+01  -1.4013202e+01  -1.0189823e+01
   2.0850545e+01  -2.8427855e+01   1.0000000e+02  -1.3603548e+01  -1.3741139e+01  -1.2886816e+01
   2.0985676e+01  -2.8477349e+01   1.0000000e+02  -1.4123632e+01  -1.2769553e+01  -1.5556565e+01
   2.1122786e+01  -2.8522585e+01   1.0000000e+02  -1.4535745e+01  -1.1209371e+01  -1.7850783e+01
   2.1261698e+01  -2.8563504e+01   1.0000000e+02  -1.4676478e+01  -9.2968466e+00  -1.9590965e+01
   2.1402232e+01  -2.8600051e+01   1.0000000e+02  -1.4410963e+01  -7.2766444e+00  -2.0807199e+01
   2.1544205e+01  -2.8632180e+01   1.0000000e+02  -1.3683897e+01  -5.2946338e+00  -2.1682197e+01
   2.1687434e+01  -2.8659846e+01   1.0000000e+02  -1.2530023e+01  -3.3379863e+00  -2.2445015e+01
   2.1831730e+01  -2.8683015e+01   1.0000000e+02  -1.1057833e+01  -1.2243453e+00  -2.3256139e+01
   2.1976905e+01  -2.8701654e+01   1.0000000e+02  -9.4293760e+00   1.3575648e+00  -2.4092606e+01
   2.2122768e+01  -2.8715741e+01   1.0000000e+02  -7.8417276e+00   4.7221418e+00  -2.4656664e+01
   2.2871159e+01  -2.8845191e+01   1.0000000e+02  -4.9763662e+00   2.5805697e+01  -8.7403064e+00
   2.3016710e+01  -2.8831814e+01   1.0000000e+02  -5.0030879e+00   2.7024309e+01  -2.2479880e+00
   2.3161629e+01  -2.8814061e+01   1.0000000e+02  -5.1775234e+00   2.6848421e+01   3.8325850e+00
   2.3305737e+01  -2.8791954e+01   1.0000000e+02  -5.4256613e+00   2.5602399e+01   9.1251280e+00
   2.3448861e+01  -2.8765519e+01   1.0000000e+02  -5.7256247e+00   2.3631953e+01   1.3456512e+01
   2.3590824e+01  -2.8734790e+01   1.0000000e+02  -6.0852370e+00   2.1254033e+01   1.6793374e+01
   2.3731456e+01  -2.8699805e+01   1.0000000e+02  -6.5045759e+00   1.8739177e+01   1.9191223e+01
   2.3870586e+01  -2.8660605e+01   1.0000000e+02  -6.9543926e+00   1.6307868e+01   2.0765090e+01
   2.4008046e+01  -2.8617239e+01   1.0000000e+02  -7.3816541e+00   1.4125316e+01   2.1677893e+01
   2.4143671e+01  -2.8569760e+01   1.0000000e+02  -7.7312578e+00   1.2287919e+01   2.2127923e+01
   2.4277300e+01  -2.8518226e+01   1.0000000e+02  -7.9657644e+00   1.0809946e+01   2.2319696e+01
   2.4408774e+01  -2.8462700e+01   1.0000000e+02  -8.0726288e+00   9.6286512e+00   2.2420642e+01
   2.4537936e+01  -2.8403249e+01   1.0000000e+02  -8.0591836e+00   8.6377260e+00   2.2526228e+01
   2.4664636e+01  -2.8339946e+01   1.0000000e+02  -7.9438029e+00   7.7357646e+00   2.2657864e+01
   2.4788725e+01  -2.8272867e+01   1.0000000e+02  -7.7531786e+00   6.8610858e+00   2.2793280e+01
   2.4910059e+01  -2.8202094e+01   1.0000000e+02  -7.5276552e+00   5.9958736e+00   2.2903109e+01
   2.5028498e+01  -2.8127711e+01   1.0000000e+02  -7.3281419e+00   5.1476970e+00   2.2967615e+01
   2.5143907e+01  -2.8049808e+01   1.0000000e+02  -7.2347612e+00   4.3268124e+00   2.2967740e+01
   2.5256155e+01  -2.7968479e+01   1.0000000e+02  -7.3295060e+00   3.5336583e+00   2.2862502e+01
   2.5365115e+01  -2.7883822e+01   1.0000000e+02  -7.6630398e+00   2.7626656e+00   2.2574592e+01
   2.5470667e+01  -2.7795936e+01   1.0000000e+02  -8.2208910e+00   2.0188093e+00   2.2004037e+01
   2.5572694e+01  -2.7704927e+01   1.0000000e+02  -8.9127309e+00   1.3334239e+00   2.1071275e+01
   2.5671085e+01  -2.7610903e+01   1.0000000e+02  -9.5972413e+00   7.6541465e-01   1.9766795e+01
   2.5765733e+01  -2.7513975e+01   1.0000000e+02  -1.0131875e+01   3.8510331e-01   1.8178007e+01
   2.5856538e+01  -2.7414257e+01   1.0000000e+02  -1.0424513e+01   2.4856797e-01   1.6479216e+01
   2.5943405e+01  -2.7311868e+01   1.0000000e+02  -1.0469863e+01   3.7277866e-01   1.4888315e+01
   2.6026242e+01  -2.7206926e+01   1.0000000e+02  -1.0361718e+01   7.2046977e-01   1.3599551e+01
   2.6104966e+01  -2.7099554e+01   1.0000000e+02  -1.0270908e+01   1.2036845e+00   1.2709055e+01
   2.6179498e+01  -2.6989879e+01   1.0000000e+02  -1.0384748e+01   1.7098337e+00   1.2166280e+01
   2.6249764e+01  -2.6878026e+01   1.0000000e+02  -1.0829005e+01   2.1396480e+00   1.1785543e+01
   2.6315695e+01  -2.6764125e+01   1.0000000e+02  -1.1613781e+01   2.4359464e+00   1.1317646e+01
   2.6377231e+01  -2.6648309e+01   1.0000000e+02  -1.2630489e+01   2.5901728e+00   1.0540751e+01
   2.6434314e+01  -2.6530709e+01   1.0000000e+02  -1.3692415e+01   2.6309429e+00   9.3262170e+00
   2.6486893e+01  -2.6411461e+01   1.0000000e+02  -1.4592254e+01   2.6059858e+00   7.6637494e+00
   2.6534923e+01  -2.6290702e+01   1.0000000e+02  -1.5155148e+01   2.5636334e+00   5.6532487e+00
   2.6578363e+01  -2.6168567e+01   1.0000000e+02  -1.5276804e+01   2.5354783e+00   3.4753725e+00
   2.6617180e+01  -2.6045196e+01   1.0000000e+02  -1.4944574e+01   2.5229754e+00   1.3484557e+00
   2.6651344e+01  -2.5920729e+01   1.0000000e+02  -1.4239652e+01   2.4926626e+00  -5.2628560e-01
   2.6680833e+01  -2.5795305e+01   1.0000000e+02  -1.3310212e+01   2.3842897e+00  -2.0227647e+00
   2.6705628e+01  -2.5669065e+01   1.0000000e+02  -1.2310415e+01   2.1317186e+00  -3.1229798e+00
   2.6725717e+01  -2.5542152e+01   1.0000000e+02  -1.1331076e+01   1.6898735e+00  -3.8937136e+00
   2.6741092e+01  -2.5414705e+01   1.0000000e+02  -1.0370796e+01   1.0567696e+00  -4.4117982e+00
   2.6751752e+01  -2.5286867e+01   1.0000000e+02  -9.3776292e+00   2.8134315e-01  -4.6877231e+00
   2.6757700e+01  -2.5158780e+01   1.0000000e+02  -8.3396358e+00  -5.4758604e-01  -4.6500207e+00
   2.6758944e+01  -2.5030584e+01   1.0000000e+02  -7.3551764e+00  -1.3267894e+00  -4.2136825e+00
   2.6755498e+01  -2.4902422e+01   1.0000000e+02  -6.6188824e+00  -1.9642680e+00  -3.3828796e+00
   2.6747379e+01  -2.4774434e+01   1.0000000e+02  -6.3309542e+00  -2.3901296e+00  -2.3033359e+00
   2.6734612e+01  -2.4646759e+01   1.0000000e+02  -6.6012590e+00  -2.5515355e+00  -1.2297843e+00
   2.6717224e+01  -2.4519538e+01   1.0000000e+02  -7.4062524e+00  -2.4061339e+00  -4.4506301e-01
   2.6695248e+01  -2.4392908e+01   1.0000000e+02  -8.6026696e+00  -1.9282357e+00  -1.8514899e-01
   2.6668722e+01  -2.4267007e+01   1.0000000e+02  -9.9700502e+00  -1.1278671e+00  -5.9597524e-01
   2.6637687e+01  -2.4141970e+01   1.0000000e+02  -1.1256133e+01  -6.8798509e-02  -1.7191845e+00
   2.6602190e+01  -2.4017934e+01   1.0000000e+02  -1.2213561e+01   1.1299163e+00  -3.4934529e+00
   2.6562281e+01  -2.3895031e+01   1.0000000e+02  -1.2628736e+01   2.3129295e+00  -5.7614047e+00
   2.6518015e+01  -2.3773393e+01   1.0000000e+02  -1.2348866e+01   3.3198959e+00  -8.2790450e+00
   2.6469452e+01  -2.3653150e+01   1.0000000e+02  -1.1315344e+01   4.0209021e+00  -1.0734090e+01
   2.6416655e+01  -2.3534430e+01   1.0000000e+02  -9.6009840e+00   4.3500860e+00  -1.2791762e+01
   2.6359690e+01  -2.3417361e+01   1.0000000e+02  -7.4224049e+00   4.3235345e+00  -1.4179512e+01
   2.6298630e+01  -2.3302065e+01   1.0000000e+02  -5.0910789e+00   4.0234325e+00  -1.4776423e+01
   2.6233547e+01  -2.3188666e+01   1.0000000e+02  -2.9149780e+00   3.5527075e+00  -1.4640833e+01
   2.6164521e+01  -2.3077283e+01   1.0000000e+02  -1.1140436e+00   2.9915011e+00  -1.3957099e+01
   2.6091634e+01  -2.2968034e+01   1.0000000e+02   2.0705330e-01   2.3797323e+00  -1.2953881e+01
   2.6014971e+01  -2.2861034e+01   1.0000000e+02   1.0454093e+00   1.7235756e+00  -1.1846221e+01
   2.5934621e+01  -2.2756394e+01   1.0000000e+02   1.4766644e+00   1.0121104e+00  -1.0805850e+01
   2.5850676e+01  -2.2654226e+01   1.0000000e+02   1.6292394e+00   2.3391583e-01  -9.9446239e+00
   2.5763230e+01  -2.2554635e+01   1.0000000e+02   1.6514738e+00  -6.1273019e-01  -9.3079104e+00
   2.5672383e+01  -2.2457726e+01   1.0000000e+02   1.6770259e+00  -1.5193070e+00  -8.8820089e+00
   2.5578234e+01  -2.2363601e+01   1.0000000e+02   1.8007669e+00  -2.4738143e+00  -8.6111619e+00
   2.5480888e+01  -2.2272356e+01   1.0000000e+02   2.0705604e+00  -3.4670404e+00  -8.4159100e+00
   2.5380451e+01  -2.2184087e+01   1.0000000e+02   2.4925284e+00  -4.4931420e+00  -8.2085097e+00
   2.5277033e+01  -2.2098885e+01   1.0000000e+02   3.0429104e+00  -5.5444781e+00  -7.9032917e+00
   2.5170746e+01  -2.2016839e+01   1.0000000e+02   3.6790557e+00  -6.6013393e+00  -7.4230565e+00
   2.5061703e+01  -2.1938034e+01   1.0000000e+02   4.3454406e+00  -7.6191765e+00  -6.7074930e+00
   2.4950021e+01  -2.1862551e+01   1.0000000e+02   4.9769943e+00  -8.5213968e+00  -5.7292179e+00
   2.4835818e+01  -2.1790468e+01   1.0000000e+02   5.5052875e+00  -9.2076130e+00  -4.5134312e+00
   2.4719216e+01  -2.1721859e+01   1.0000000e+02   5.8697591e+00  -9.5786069e+00  -3.1483481e+00
   2.4600336e+01  -2.1656796e+01   1.0000000e+02   6.0300998e+00  -9.5688171e+00  -1.7769743e+00
   2.4479304e+01  -2.1595345e+01   1.0000000e+02   5.9738520e+00  -9.1757507e+00  -5.7058017e-01
   2.4356246e+01  -2.1537569e+01   1.0000000e+02   5.7165966e+00  -8.4768823e+00   3.1098022e-01
   2.4231289e+01  -2.1483527e+01   1.0000000e+02   5.2948343e+00  -7.6238878e+00   7.6244409e-01
   2.4104564e+01  -2.1433276e+01   1.0000000e+02   4.7540421e+00  -6.8107246e+00   7.6515813e-01
   2.3976201e+01  -2.1386867e+01   1.0000000e+02   4.1343166e+00  -6.2239912e+00   3.9622364e-01
   2.3846332e+01  -2.1344346e+01   1.0000000e+02   3.4566216e+00  -5.9914436e+00  -1.9135008e-01
   2.3715091e+01  -2.1305759e+01   1.0000000e+02   2.7161805e+00  -6.1482005e+00  -8.1602068e-01
   2.3582613e+01  -2.1271144e+01   1.0000000e+02   1.8889108e+00  -6.6374327e+00  -1.3268696e+00
   2.3449032e+01  -2.1240537e+01   1.0000000e+02   9.4902049e-01  -7.3478915e+00  -1.6476990e+00
   2.3314487e+01  -2.1213968e+01   1.0000000e+02  -1.1163191e-01  -8.1696218e+00  -1.7824454e+00
   2.3179113e+01  -2.1191466e+01   1.0000000e+02  -1.2729727e+00  -9.0357708e+00  -1.7801332e+00
   2.3043048e+01  -2.1173053e+01   1.0000000e+02  -2.4898912e+00  -9.9266056e+00  -1.6862897e+00
   2.2906432e+01  -2.1158749e+01   1.0000000e+02  -3.7052087e+00  -1.0843877e+01  -1.5170264e+00
   2.2769404e+01  -2.1148566e+01   1.0000000e+02  -4.8630519e+00  -1.1786770e+01  -1.2660485e+00
   2.2632101e+01  -2.1142517e+01   1.0000000e+02  -5.9162624e+00  -1.2750204e+01  -9.2206390e-01
   2.2494664e+01  -2.1140607e+01   1.0000000e+02  -6.8293497e+00  -1.3735606e+01  -4.7179802e-01
   2.2357233e+01  -2.1142839e+01   1.0000000e+02  -7.5810254e+00  -1.4753001e+01   1.1113020e-01
   2.2219947e+01  -2.1149209e+01   1.0000000e+02  -8.1659963e+00  -1.5807939e+01   8.7307780e-01
   2.2082945e+01  -2.1159712e+01   1.0000000e+02  -8.5920781e+00  -1.6884928e+01   1.8727119e+00
   2.1946367e+01  -2.1174336e+01   1.0000000e+02  -8.8724523e+00  -1.7938818e+01   3.1638279e+00
   2.1810352e+01  -2.1193067e+01   1.0000000e+02  -9.0189128e+00  -1.8896111e+01   4.7792755e+00
   2.1675037e+01  -2.1215886e+01   1.0000000e+02  -9.0414218e+00  -1.9661235e+01   6.7210477e+00
   2.1540561e+01  -2.1242768e+01   1.0000000e+02  -8.9527509e+00  -2.0123604e+01   8.9540833e+00
   2.1407062e+01  -2.1273688e+01   1.0000000e+02  -8.7727651e+00  -2.0168954e+01   1.1398970e+01
   2.1274674e+01  -2.1308613e+01   1.0000000e+02  -8.5283931e+00  -1.9703408e+01   1.3926797e+01
   2.1143535e+01  -2.1347507e+01   1.0000000e+02  -8.2489616e+00  -1.8689208e+01   1.6370797e+01
   2.1013778e+01  -2.1390331e+01   1.0000000e+02  -7.9586632e+00  -1.7171827e+01   1.8563575e+01
   2.0885538e+01  -2.1437040e+01   1.0000000e+02  -7.6697066e+00  -1.5274084e+01   2.0384080e+01
   2.0758945e+01  -2.1487588e+01   1.0000000e+02  -7.3805814e+00  -1.3156351e+01   2.1784426e+01
   2.0634131e+01  -2.1541921e+01   1.0000000e+02  -7.0815405e+00  -1.0969944e+01   2.2781995e+01
   2.0511225e+01  -2.1599984e+01   1.0000000e+02  -6.7639986e+00  -8.8293635e+00   2.3432278e+01
   2.0390356e+01  -2.1661718e+01   1.0000000e+02  -6.4275860e+00  -6.8075411e+00   2.3804794e+01
   2.0271649e+01  -2.1727059e+01   1.0000000e+02  -6.0810002e+00  -4.9424631e+00   2.3971519e+01
   2.0155228e+01  -2.1795940e+01   1.0000000e+02  -5.7367301e+00  -3.2454563e+00   2.4003225e+01
   2.0041217e+01  -2.1868290e+01   1.0000000e+02  -5.4022843e+00  -1.7092762e+00   2.3966128e+01
   1.9929736e+01  -2.1944034e+01   1.0000000e+02  -5.0719772e+00  -3.1777514e-01   2.3916795e+01
   1.9820903e+01  -2.2023094e+01   1.0000000e+02  -4.7221445e+00   9.4418720e-01   2.3897892e+01
   1.9714834e+01  -2.2105388e+01   1.0000000e+02  -4.3105919e+00   2.0849581e+00   2.3934938e+01
   1.9611643e+01  -2.2190831e+01   1.0000000e+02  -3.7819295e+00   3.1052827e+00   2.4031438e+01
   1.9511443e+01  -2.2279334e+01   1.0000000e+02  -3.0809038e+00   3.9984946e+00   2.4163826e+01
   1.9414341e+01  -2.2370806e+01   1.0000000e+02  -2.1709634e+00   4.7492716e+00   2.4283511e+01
   1.9320445e+01  -2.2465151e+01   1.0000000e+02  -1.0489846e+00   5.3335070e+00   2.4330227e+01
   1.9229858e+01  -2.2562272e+01   1.0000000e+02   2.5238132e-01   5.7230239e+00   2.4250756e+01
   1.9142681e+01  -2.2662066e+01   1.0000000e+02   1.6743449e+00   5.8941881e+00   2.4012692e+01
   1.9059011e+01  -2.2764431e+01   1.0000000e+02   3.1463429e+00   5.8362263e+00   2.3608238e+01
   1.8978944e+01  -2.2869257e+01   1.0000000e+02   4.5975356e+00   5.5558952e+00   2.3050391e+01
   1.8902571e+01  -2.2976436e+01   1.0000000e+02   5.9637297e+00   5.0781041e+00   2.2366645e+01
   1.8829981e+01  -2.3085855e+01   1.0000000e+02   7.1905671e+00   4.4433147e+00   2.1592695e+01
   1.8761258e+01  -2.3197399e+01   1.0000000e+02   8.2346607e+00   3.7023070e+00   2.0767394e+01
   1.8696485e+01  -2.3310949e+01   1.0000000e+02   9.0641092e+00   2.9092771e+00   1.9930794e+01
   1.8635740e+01  -2.3426387e+01   1.0000000e+02   9.6614986e+00   2.1148615e+00   1.9124751e+01
   1.8579096e+01  -2.3543589e+01   1.0000000e+02   1.0030246e+01   1.3600604e+00   1.8391879e+01
   1.8526625e+01  -2.3662432e+01   1.0000000e+02   1.0200293e+01   6.7022407e-01   1.7769102e+01
   1.8478394e+01  -2.3782787e+01   1.0000000e+02   1.0226671e+01   4.9490792e-02   1.7278082e+01
   1.8434464e+01  -2.3904529e+01   1.0000000e+02   1.0179581e+01  -5.2180913e-01   1.6918534e+01
   1.8394896e+01  -2.4027524e+01   1.0000000e+02   1.0129497e+01  -1.0831705e+00   1.6667793e+01
   1.8359743e+01  -2.4151643e+01   1.0000000e+02   1.0132311e+01  -1.6830148e+00   1.6485742e+01
   1.8329057e+01  -2.4276751e+01   1.0000000e+02   1.0218766e+01  -2.3634838e+00   1.6322908e+01
   1.8302882e+01  -2.4402714e+01   1.0000000e+02   1.0390358e+01  -3.1455897e+00   1.6128253e+01
   1.8281261e+01  -2.4529395e+01   1.0000000e+02   1.0620668e+01  -4.0202886e+00   1.5854580e+01
   1.8264231e+01  -2.4656656e+01   1.0000000e+02   1.0859892e+01  -4.9501284e+00   1.5463731e+01
   1.8251824e+01  -2.4784360e+01   1.0000000e+02   1.1044825e+01  -5.8819058e+00   1.4934892e+01
   1.8244067e+01  -2.4912367e+01   1.0000000e+02   1.1117660e+01  -6.7639493e+00   1.4270991e+01
   1.8240985e+01  -2.5040537e+01   1.0000000e+02   1.1046740e+01  -7.5594103e+00   1.3491303e+01
   1.8242593e+01  -2.5168729e+01   1.0000000e+02   1.0831264e+01  -8.2506585e+00   1.2609533e+01
   1.8248907e+01  -2.5296802e+01   1.0000000e+02   1.0481009e+01  -8.8368296e+00   1.1616206e+01
   1.8259933e+01  -2.5424615e+01   1.0000000e+02   9.9858479e+00  -9.3271258e+00   1.0486172e+01
   1.8275674e+01  -2.5552025e+01   1.0000000e+02   9.3014990e+00  -9.7330216e+00   9.2093872e+00
   1.8296128e+01  -2.5678892e+01   1.0000000e+02   8.3640870e+00  -1.0061251e+01   7.8230639e+00
   1.8321288e+01  -2.5805073e+01   1.0000000e+02   7.1243260e+00  -1.0310642e+01   6.4230585e+00
   1.8351141e+01  -2.5930428e+01   1.0000000e+02   5.5801267e+00  -1.0474064e+01   5.1478417e+00
   1.8385667e+01  -2.6054815e+01   1.0000000e+02   3.7906994e+00  -1.0544362e+01   4.1457573e+00
   1.8424844e+01  -2.6178095e+01   1.0000000e+02   1.8688647e+00  -1.0522347e+01   3.5422093e+00
   1.8468642e+01  -2.6300127e+01   1.0000000e+02  -3.9552993e-02  -1.0425138e+01   3.4170550e+00
   1.8517026e+01  -2.6420775e+01   1.0000000e+02  -1.7798681e+00  -1.0292816e+01   3.7913713e+00
   1.8569957e+01  -2.6539900e+01   1.0000000e+02  -3.2115615e+00  -1.0188260e+01   4.6201013e+00
   1.8627387e+01  -2.6657366e+01   1.0000000e+02  -4.2291321e+00  -1.0185198e+01   5.7921987e+00
   1.8689266e+01  -2.6773038e+01   1.0000000e+02  -4.7766270e+00  -1.0347071e+01   7.1420577e+00
   1.8755537e+01  -2.6886784e+01   1.0000000e+02  -4.8528933e+00  -1.0706548e+01   8.4705690e+00
   1.8826136e+01  -2.6998473e+01   1.0000000e+02  -4.5103173e+00  -1.1255566e+01   9.5706008e+00
   1.8900996e+01  -2.7107974e+01   1.0000000e+02  -3.8495850e+00  -1.1947426e+01   1.0254286e+01
   1.8980042e+01  -2.7215161e+01   1.0000000e+02  -3.0094051e+00  -1.2704854e+01   1.0379423e+01
   1.9063196e+01  -2.7319909e+01   1.0000000e+02  -2.1511524e+00  -1.3428996e+01   9.8713800e+00
   1.9150371e+01  -2.7422096e+01   1.0000000e+02  -1.4393470e+00  -1.4010198e+01   8.7381580e+00
   1.9241478e+01  -2.7521601e+01   1.0000000e+02  -1.0201245e+00  -1.4344801e+01   7.0740303e+00
   1.9336421e+01  -2.7618308e+01   1.0000000e+02  -1.0018311e+00  -1.4356383e+01   5.0484242e+00
   1.9435097e+01  -2.7712102e+01   1.0000000e+02  -1.4421790e+00  -1.4015415e+01   2.8817199e+00
   1.9537402e+01  -2.7802872e+01   1.0000000e+02  -2.3419036e+00  -1.3351769e+01   8.1394598e-01
   1.9643223e+01  -2.7890511e+01   1.0000000e+02  -3.6418949e+00  -1.2459609e+01  -9.2993658e-01
   1.9752443e+01  -2.7974914e+01   1.0000000e+02  -5.2240634e+00  -1.1495118e+01  -2.1815346e+00
   1.9864941e+01  -2.8055980e+01   1.0000000e+02  -6.9230101e+00  -1.0659921e+01  -2.8779872e+00
   1.9980590e+01  -2.8133613e+01   1.0000000e+02  -8.5573711e+00  -1.0160328e+01  -3.1033908e+00
   2.0099259e+01  -2.8207718e+01   1.0000000e+02  -9.9790050e+00  -1.0145157e+01  -3.0943364e+00
   2.0220812e+01  -2.8278208e+01   1.0000000e+02  -1.1121825e+01  -1.0643762e+01  -3.1882873e+00
   2.0345108e+01  -2.8344997e+01   1.0000000e+02  -1.2022390e+01  -1.1534501e+01  -3.7213346e+00
   2.0472005e+01  -2.8408004e+01   1.0000000e+02  -1.2794311e+01  -1.2562956e+01  -4.9128564e+00
   2.0601352e+01  -2.8467152e+01   1.0000000e+02  -1.3565784e+01  -1.3408749e+01  -6.7851200e+00
   2.0732999e+01  -2.8522371e+01   1.0000000e+02  -1.4410921e+01  -1.3783444e+01  -9.1519798e+00
   2.0866788e+01  -2.8573592e+01   1.0000000e+02  -1.5305885e+01  -1.3527330e+01  -1.1687921e+01
   2.1002562e+01  -2.8620753e+01   1.0000000e+02  -1.6129638e+01  -1.2659454e+01  -1.4058026e+01
   2.1140158e+01  -2.8663798e+01   1.0000000e+02  -1.6709746e+01  -1.1347548e+01  -1.6048217e+01
   2.1279410e+01  -2.8702672e+01   1.0000000e+02  -1.6890224e+01  -9.8132958e+00  -1.7627702e+01
   2.1420151e+01  -2.8737329e+01   1.0000000e+02  -1.6585001e+01  -8.2279624e+00  -1.8920678e+01
   2.1562211e+01  -2.8767726e+01   1.0000000e+02  -1.5792516e+01  -6.6440910e+00  -2.0124103e+01
   2.1705417e+01  -2.8793825e+01   1.0000000e+02  -1.4579124e+01  -4.9670736e+00  -2.1419159e+01
   2.1849595e+01  -2.8815595e+01   1.0000000e+02  -1.3056258e+01  -2.9532387e+00  -2.2882663e+01
   2.1994569e+01  -2.8833009e+01   1.0000000e+02  -1.1363437e+01  -2.5619554e-01  -2.4382236e+01
   2.2140162e+01  -2.8846046e+01   1.0000000e+02  -9.6530323e+00   3.4304493e+00  -2.5494428e+01
   2.2286196e+01  -2.8854688e+01   1.0000000e+02  -8.0736437e+00   8.1475115e+00  -2.5556495e+01
   2.2432492e+01  -2.8858927e+01   1.0000000e+02  -6.7541744e+00   1.3500206e+01  -2.3923476e+01
   2.2578871e+01  -2.8858755e+01   1.0000000e+02  -5.7866462e+00   1.8723979e+01  -2.0320070e+01
   2.2725153e+01  -2.8854175e+01   1.0000000e+02  -5.2060607e+00   2.3001338e+01  -1.5026422e+01
   2.3482750e+01  -2.8890663e+01   1.0000000e+02  -4.1469564e+00   2.3059677e+01   1.4070263e+01
   2.3625094e+01  -2.8859884e+01   1.0000000e+02  -4.4775392e+00   2.0645954e+01   1.7375236e+01
   2.3766142e+01  -2.8824969e+01   1.0000000e+02  -4.9165337e+00   1.8132292e+01   1.9771384e+01
   2.3905735e+01  -2.8785956e+01   1.0000000e+02  -5.4090862e+00   1.5700472e+01   2.1382924e+01
   2.4043712e+01  -2.8742890e+01   1.0000000e+02  -5.8860718e+00   1.3489073e+01   2.2360047e+01
   2.4179920e+01  -2.8695823e+01   1.0000000e+02  -6.2817045e+00   1.1583816e+01   2.2880040e+01
   2.4314203e+01  -2.8644807e+01   1.0000000e+02  -6.5516483e+00   9.9991872e+00   2.3126757e+01
   2.4446412e+01  -2.8589902e+01   1.0000000e+02  -6.6807613e+00   8.6780117e+00   2.3249416e+01
   2.4576399e+01  -2.8531171e+01   1.0000000e+02  -6.6780508e+00   7.5234786e+00   2.3326986e+01
   2.4704021e+01  -2.8468680e+01   1.0000000e+02  -6.5647028e+00   6.4488315e+00   2.3367100e+01
   2.4829135e+01  -2.8402501e+01   1.0000000e+02  -6.3661242e+00   5.4128658e+00   2.3341336e+01
   2.4951607e+01  -2.8332709e+01   1.0000000e+02  -6.1140068e+00   4.4219747e+00   2.3228741e+01
   2.5071302e+01  -2.8259385e+01   1.0000000e+02  -5.8552607e+00   3.5076960e+00   2.3038385e+01
   2.5188091e+01  -2.8182611e+01   1.0000000e+02  -5.6598854e+00   2.6989688e+00   2.2802512e+01
   2.5301850e+01  -2.8102474e+01   1.0000000e+02  -5.6183904e+00   2.0024031e+00   2.2547099e+01
   2.5412458e+01  -2.8019064e+01   1.0000000e+02  -5.8194779e+00   1.3989557e+00   2.2255132e+01
   2.5519799e+01  -2.7932477e+01   1.0000000e+02  -6.3096190e+00   8.6109620e-01   2.1848547e+01
   2.5623761e+01  -2.7842807e+01   1.0000000e+02  -7.0565239e+00   3.8073843e-01   2.1211557e+01
   2.5724237e+01  -2.7750157e+01   1.0000000e+02  -7.9433847e+00  -1.3803495e-02   2.0249317e+01
   2.5821125e+01  -2.7654630e+01   1.0000000e+02  -8.8026701e+00  -2.6535058e-01   1.8947822e+01
   2.5914327e+01  -2.7556331e+01   1.0000000e+02  -9.4727532e+00  -3.1493191e-01   1.7400703e+01
   2.6003751e+01  -2.7455370e+01   1.0000000e+02  -9.8528074e+00  -1.3190682e-01   1.5791741e+01
   2.6089309e+01  -2.7351859e+01   1.0000000e+02  -9.9403870e+00   2.6686136e-01   1.4342131e+01
   2.6170918e+01  -2.7245912e+01   1.0000000e+02  -9.8428941e+00   8.1511248e-01   1.3236885e+01
   2.6248502e+01  -2.7137645e+01   1.0000000e+02  -9.7513321e+00   1.4141405e+00   1.2550721e+01
   2.6321987e+01  -2.7027176e+01   1.0000000e+02  -9.8728615e+00   1.9637278e+00   1.2207419e+01
   2.6391306e+01  -2.6914627e+01   1.0000000e+02  -1.0347159e+01   2.3927547e+00   1.2001579e+01
   2.6456397e+01  -2.6800120e+01   1.0000000e+02  -1.1190283e+01   2.6745192e+00   1.1674663e+01
   2.6517203e+01  -2.6683778e+01   1.0000000e+02  -1.2291910e+01   2.8244574e+00   1.1003377e+01
   2.6573672e+01  -2.6565729e+01   1.0000000e+02  -1.3457541e+01   2.8883321e+00   9.8621881e+00
   2.6625757e+01  -2.6446098e+01   1.0000000e+02  -1.4470295e+01   2.9263649e+00   8.2475872e+00
   2.6673417e+01  -2.6325015e+01   1.0000000e+02  -1.5149352e+01   2.9933893e+00   6.2687550e+00
   2.6716615e+01  -2.6202608e+01   1.0000000e+02  -1.5391125e+01   3.1176592e+00   4.1130464e+00
   2.6755319e+01  -2.6079009e+01   1.0000000e+02  -1.5188330e+01   3.2860979e+00   1.9967497e+00
   2.6789504e+01  -2.5954348e+01   1.0000000e+02  -1.4627650e+01   3.4428690e+00   1.0828213e-01
   2.6819147e+01  -2.5828758e+01   1.0000000e+02  -1.3860176e+01   3.5032033e+00  -1.4470072e+00
   2.6844232e+01  -2.5702371e+01   1.0000000e+02  -1.3039370e+01   3.3790374e+00  -2.6764438e+00
   2.6864748e+01  -2.5575320e+01   1.0000000e+02  -1.2247991e+01   3.0078950e+00  -3.6735710e+00
   2.6880688e+01  -2.5447738e+01   1.0000000e+02  -1.1462040e+01   2.3752962e+00  -4.5361149e+00
   2.6892049e+01  -2.5319759e+01   1.0000000e+02  -1.0588841e+01   1.5233532e+00  -5.2752697e+00
   2.6898836e+01  -2.5191515e+01   1.0000000e+02  -9.5674117e+00   5.4218883e-01  -5.7852290e+00
   2.6901055e+01  -2.5063141e+01   1.0000000e+02  -8.4618327e+00  -4.5255699e-01  -5.9114996e+00
   2.6898718e+01  -2.4934768e+01   1.0000000e+02  -7.4665125e+00  -1.3454560e+00  -5.5765496e+00
   2.6891843e+01  -2.4806529e+01   1.0000000e+02  -6.8126359e+00  -2.0379731e+00  -4.8620283e+00
   2.6880449e+01  -2.4678557e+01   1.0000000e+02  -6.6525493e+00  -2.4517686e+00  -3.9871443e+00
   2.6864563e+01  -2.4550981e+01   1.0000000e+02  -7.0033983e+00  -2.5260332e+00  -3.2177826e+00
   2.6844215e+01  -2.4423934e+01   1.0000000e+02  -7.7634520e+00  -2.2213001e+00  -2.7802603e+00
   2.6819438e+01  -2.4297543e+01   1.0000000e+02  -8.7624481e+00  -1.5339653e+00  -2.8210430e+00
   2.6790271e+01  -2.4171938e+01   1.0000000e+02  -9.8049205e+00  -5.1316131e-01  -3.4060901e+00
   2.6756755e+01  -2.4047245e+01   1.0000000e+02  -1.0692551e+01   7.3344739e-01  -4.5312169e+00
   2.6718937e+01  -2.3923592e+01   1.0000000e+02  -1.1236047e+01   2.0517126e+00  -6.1242399e+00
   2.6676867e+01  -2.3801102e+01   1.0000000e+02  -1.1271898e+01   3.2672854e+00  -8.0402220e+00
   2.6630600e+01  -2.3679898e+01   1.0000000e+02  -1.0689889e+01   4.2183343e+00  -1.0060767e+01
   2.6580191e+01  -2.3560103e+01   1.0000000e+02  -9.4706879e+00   4.7908957e+00  -1.1910466e+01
   2.6525703e+01  -2.3441835e+01   1.0000000e+02  -7.7206819e+00   4.9505492e+00  -1.3307301e+01
   2.6467201e+01  -2.3325214e+01   1.0000000e+02  -5.6717432e+00   4.7514041e+00  -1.4047306e+01
   2.6404752e+01  -2.3210354e+01   1.0000000e+02  -3.6203632e+00   4.3055354e+00  -1.4078713e+01
   2.6338428e+01  -2.3097370e+01   1.0000000e+02  -1.8350861e+00   3.7269644e+00  -1.3507657e+01
   2.6268304e+01  -2.2986375e+01   1.0000000e+02  -4.9102899e-01   3.0884673e+00  -1.2538131e+01
   2.6194458e+01  -2.2877477e+01   1.0000000e+02   3.4735549e-01   2.4122172e+00  -1.1400272e+01
   2.6116972e+01  -2.2770784e+01   1.0000000e+02   7.1698474e-01   1.6852813e+00  -1.0300096e+01
   2.6035928e+01  -2.2666402e+01   1.0000000e+02   7.3605140e-01   8.8333642e-01  -9.3862350e+00
   2.5951415e+01  -2.2564433e+01   1.0000000e+02   5.6991784e-01  -7.8249008e-03  -8.7294582e+00
   2.5863521e+01  -2.2464976e+01   1.0000000e+02   3.8549689e-01  -9.8053850e-01  -8.3232734e+00
   2.5772340e+01  -2.2368131e+01   1.0000000e+02   3.1084025e-01  -2.0081782e+00  -8.1069079e+00
   2.5677967e+01  -2.2273990e+01   1.0000000e+02   4.1571988e-01  -3.0595808e+00  -7.9962162e+00
   2.5580500e+01  -2.2182646e+01   1.0000000e+02   7.1464080e-01  -4.1130967e+00  -7.9066055e+00
   2.5480038e+01  -2.2094189e+01   1.0000000e+02   1.1832089e+00  -5.1612925e+00  -7.7632313e+00
   2.5376684e+01  -2.2008704e+01   1.0000000e+02   1.7775563e+00  -6.2050515e+00  -7.5016692e+00
   2.5270544e+01  -2.1926274e+01   1.0000000e+02   2.4486086e+00  -7.2399543e+00  -7.0645894e+00
   2.5161723e+01  -2.1846979e+01   1.0000000e+02   3.1472539e+00  -8.2393046e+00  -6.4021200e+00
   2.5050331e+01  -2.1770896e+01   1.0000000e+02   3.8228110e+00  -9.1416129e+00  -5.4830564e+00
   2.4936480e+01  -2.1698100e+01   1.0000000e+02   4.4223610e+00  -9.8531180e+00  -4.3152136e+00
   2.4820282e+01  -2.1628659e+01   1.0000000e+02   4.8958793e+00  -1.0269211e+01  -2.9613977e+00
   2.4701851e+01  -2.1562642e+01   1.0000000e+02   5.2041770e+00  -1.0306119e+01  -1.5388713e+00
   2.4581305e+01  -2.1500112e+01   1.0000000e+02   5.3238835e+00  -9.9316939e+00  -2.0235339e-01
   2.4458761e+01  -2.1441130e+01   1.0000000e+02   5.2488826e+00  -9.1879915e+00   8.8453437e-01
   2.4334339e+01  -2.1385751e+01   1.0000000e+02   4.9901710e+00  -8.1975007e+00   1.5866933e+00
   2.4208160e+01  -2.1334030e+01   1.0000000e+02   4.5740933e+00  -7.1437942e+00   1.8358459e+00
   2.4080347e+01  -2.1286017e+01   1.0000000e+02   4.0356796e+00  -6.2274727e+00   1.6546011e+00
   2.3951023e+01  -2.1241756e+01   1.0000000e+02   3.4057736e+00  -5.6116870e+00   1.1521636e+00
   2.3820312e+01  -2.1201292e+01   1.0000000e+02   2.6979858e+00  -5.3791738e+00   4.8868843e-01
   2.3688341e+01  -2.1164662e+01   1.0000000e+02   1.9052134e+00  -5.5192554e+00  -1.7861863e-01
   2.3555235e+01  -2.1131903e+01   1.0000000e+02   1.0098720e+00  -5.9505714e+00  -7.4465137e-01
   2.3421124e+01  -2.1103045e+01   1.0000000e+02   2.2642995e-03  -6.5688617e+00  -1.1778348e+00
   2.3286135e+01  -2.1078115e+01   1.0000000e+02  -1.1042820e+00  -7.2954381e+00  -1.5031738e+00
   2.3150396e+01  -2.1057139e+01   1.0000000e+02  -2.2708386e+00  -8.0985476e+00  -1.7587859e+00
   2.3014039e+01  -2.1040136e+01   1.0000000e+02  -3.4429886e+00  -8.9787749e+00  -1.9584938e+00
   2.2877192e+01  -2.1027122e+01   1.0000000e+02  -4.5648596e+00  -9.9396261e+00  -2.0857467e+00
   2.2739985e+01  -2.1018110e+01   1.0000000e+02  -5.5885417e+00  -1.0972601e+01  -2.1118554e+00
   2.2602551e+01  -2.1013108e+01   1.0000000e+02  -6.4780670e+00  -1.2063932e+01  -2.0110445e+00
   2.2465019e+01  -2.1012121e+01   1.0000000e+02  -7.2118237e+00  -1.3205277e+01  -1.7576825e+00
   2.2327520e+01  -2.1015150e+01   1.0000000e+02  -7.7847823e+00  -1.4391993e+01  -1.3163926e+00
   2.2190185e+01  -2.1022193e+01   1.0000000e+02  -8.2074025e+00  -1.5612301e+01  -6.4035648e-01
   2.2053146e+01  -2.1033242e+01   1.0000000e+02  -8.4980962e+00  -1.6837988e+01   3.2117424e-01
   2.1916531e+01  -2.1048287e+01   1.0000000e+02  -8.6723102e+00  -1.8019548e+01   1.6129657e+00
   2.1780472e+01  -2.1067314e+01   1.0000000e+02  -8.7358322e+00  -1.9083448e+01   3.2634296e+00
   2.1645099e+01  -2.1090304e+01   1.0000000e+02  -8.6869349e+00  -1.9932051e+01   5.2730947e+00
   2.1510540e+01  -2.1117235e+01   1.0000000e+02  -8.5245560e+00  -2.0448831e+01   7.6013625e+00
   2.1376925e+01  -2.1148081e+01   1.0000000e+02  -8.2562956e+00  -2.0514210e+01   1.0153284e+01
   2.1244380e+01  -2.1182813e+01   1.0000000e+02  -7.9023203e+00  -2.0036641e+01   1.2775656e+01
   2.1113034e+01  -2.1221398e+01   1.0000000e+02  -7.4942792e+00  -1.8991958e+01   1.5277021e+01
   2.0983013e+01  -2.1263798e+01   1.0000000e+02  -7.0689339e+00  -1.7446997e+01   1.7476066e+01
   2.0854442e+01  -2.1309973e+01   1.0000000e+02  -6.6577945e+00  -1.5544409e+01   1.9255195e+01
   2.0727444e+01  -2.1359879e+01   1.0000000e+02  -6.2775154e+00  -1.3454219e+01   2.0584098e+01
   2.0602144e+01  -2.1413467e+01   1.0000000e+02  -5.9274903e+00  -1.1324665e+01   2.1501487e+01
   2.0478663e+01  -2.1470685e+01   1.0000000e+02  -5.5962223e+00  -9.2586297e+00   2.2077218e+01
   2.0357120e+01  -2.1531480e+01   1.0000000e+02  -5.2715386e+00  -7.3153849e+00   2.2383173e+01
   2.0237635e+01  -2.1595791e+01   1.0000000e+02  -4.9482226e+00  -5.5220093e+00   2.2482392e+01
   2.0120326e+01  -2.1663558e+01   1.0000000e+02  -4.6301207e+00  -3.8835631e+00   2.2429568e+01
   2.0005307e+01  -2.1734714e+01   1.0000000e+02  -4.3265708e+00  -2.3912874e+00   2.2273658e+01
   1.9892693e+01  -2.1809191e+01   1.0000000e+02  -4.0456165e+00  -1.0309372e+00   2.2059522e+01
   1.9782595e+01  -2.1886917e+01   1.0000000e+02  -3.7862659e+00   2.0903919e-01   2.1829194e+01
   1.9675124e+01  -2.1967816e+01   1.0000000e+02  -3.5315853e+00   1.3331277e+00   2.1622699e+01
   1.9570388e+01  -2.2051811e+01   1.0000000e+02  -3.2448685e+00   2.3404019e+00   2.1474298e+01
   1.9468492e+01  -2.2138818e+01   1.0000000e+02  -2.8734474e+00   3.2283037e+00   2.1402194e+01
   1.9369541e+01  -2.2228755e+01   1.0000000e+02  -2.3627482e+00   3.9931188e+00   2.1398456e+01
   1.9273635e+01  -2.2321533e+01   1.0000000e+02  -1.6751749e+00   4.6263370e+00   2.1428780e+01
   1.9180874e+01  -2.2417061e+01   1.0000000e+02  -8.0329620e-01   5.1120605e+00   2.1445319e+01
   1.9091353e+01  -2.2515247e+01   1.0000000e+02   2.2976252e-01   5.4298013e+00   2.1404071e+01
   1.9005168e+01  -2.2615993e+01   1.0000000e+02   1.3799775e+00   5.5619323e+00   2.1276736e+01
   1.8922409e+01  -2.2719203e+01   1.0000000e+02   2.5945756e+00   5.5018077e+00   2.1053157e+01
   1.8843164e+01  -2.2824773e+01   1.0000000e+02   3.8203532e+00   5.2590033e+00   2.0737164e+01
   1.8767518e+01  -2.2932601e+01   1.0000000e+02   5.0076352e+00   4.8602451e+00   2.0340722e+01
   1.8695556e+01  -2.3042579e+01   1.0000000e+02   6.1115168e+00   4.3460675e+00   1.9878897e+01
   1.8627356e+01  -2.3154600e+01   1.0000000e+02   7.0921224e+00   3.7643732e+00   1.9366979e+01
   1.8562994e+01  -2.3268552e+01   1.0000000e+02   7.9147782e+00   3.1629433e+00   1.8821049e+01
   1.8502543e+01  -2.3384322e+01   1.0000000e+02   8.5527647e+00   2.5825674e+00   1.8261097e+01
   1.8446075e+01  -2.3501796e+01   1.0000000e+02   8.9935288e+00   2.0514487e+00   1.7712980e+01
   1.8393654e+01  -2.3620856e+01   1.0000000e+02   9.2450976e+00   1.5808049e+00   1.7206071e+01
   1.8345344e+01  -2.3741382e+01   1.0000000e+02   9.3379806e+00   1.1622406e+00   1.6767914e+01
   1.8301205e+01  -2.3863256e+01   1.0000000e+02   9.3209348e+00   7.6886928e-01   1.6419077e+01
   1.8261291e+01  -2.3986353e+01   1.0000000e+02   9.2526726e+00   3.6173856e-01   1.6169515e+01
   1.8225656e+01  -2.4110551e+01   1.0000000e+02   9.1919652e+00  -9.9438155e-02   1.6016023e+01
   1.8194347e+01  -2.4235723e+01   1.0000000e+02   9.1881090e+00  -6.4349322e-01   1.5940649e+01
   1.8167407e+01  -2.4361744e+01   1.0000000e+02   9.2733964e+00  -1.2772091e+00   1.5909438e+01
   1.8144879e+01  -2.4488485e+01   1.0000000e+02   9.4565617e+00  -1.9813741e+00   1.5871699e+01
   1.8126796e+01  -2.4615817e+01   1.0000000e+02   9.7162995e+00  -2.7164924e+00   1.5764614e+01
   1.8113192e+01  -2.4743611e+01   1.0000000e+02   1.0000638e+01  -3.4365019e+00   1.5528894e+01
   1.8104094e+01  -2.4871735e+01   1.0000000e+02   1.0241224e+01  -4.1032868e+00   1.5129516e+01
   1.8099525e+01  -2.5000059e+01   1.0000000e+02   1.0380320e+01  -4.6957033e+00   1.4562955e+01
   1.8099504e+01  -2.5128449e+01   1.0000000e+02   1.0389579e+01  -5.2110753e+00   1.3840852e+01
   1.8104045e+01  -2.5256773e+01   1.0000000e+02   1.0262039e+01  -5.6617528e+00   1.2966112e+01
   1.8113158e+01  -2.5384899e+01   1.0000000e+02   9.9848436e+00  -6.0688843e+00   1.1927981e+01
   1.8126848e+01  -2.5512693e+01   1.0000000e+02   9.5192101e+00  -6.4541015e+00   1.0722978e+01
   1.8145116e+01  -2.5640021e+01   1.0000000e+02   8.8055990e+00  -6.8310163e+00   9.3839199e+00
   1.8167958e+01  -2.5766751e+01   1.0000000e+02   7.7904653e+00  -7.2000976e+00   7.9947957e+00
   1.8195363e+01  -2.5892749e+01   1.0000000e+02   6.4576314e+00  -7.5492391e+00   6.6817076e+00
   1.8227318e+01  -2.6017883e+01   1.0000000e+02   4.8468638e+00  -7.8587748e+00   5.5853650e+00
   1.8263805e+01  -2.6142020e+01   1.0000000e+02   3.0520999e+00  -8.1078631e+00   4.8302006e+00
   1.8304799e+01  -2.6265030e+01   1.0000000e+02   1.2039086e+00  -8.2813261e+00   4.5027570e+00
   1.8350270e+01  -2.6386779e+01   1.0000000e+02  -5.5309782e-01  -8.3773527e+00   4.6425176e+00
   1.8400186e+01  -2.6507140e+01   1.0000000e+02  -2.0800929e+00  -8.4149150e+00   5.2400395e+00
   1.8454507e+01  -2.6625982e+01   1.0000000e+02  -3.2582884e+00  -8.4363154e+00   6.2357617e+00
   1.8513188e+01  -2.6743179e+01   1.0000000e+02  -4.0002847e+00  -8.4996072e+00   7.5184266e+00
   1.8576181e+01  -2.6858603e+01   1.0000000e+02  -4.2604121e+00  -8.6619504e+00   8.9275909e+00
   1.8643430e+01  -2.6972130e+01   1.0000000e+02  -4.0452565e+00  -8.9619148e+00   1.0266425e+01
   1.8714876e+01  -2.7083636e+01   1.0000000e+02  -3.4205094e+00  -9.4092328e+00   1.1327905e+01
   1.8790455e+01  -2.7192999e+01   1.0000000e+02  -2.5060641e+00  -9.9830530e+00   1.1928793e+01
   1.8870096e+01  -2.7300101e+01   1.0000000e+02  -1.4583504e+00  -1.0633668e+01   1.1938557e+01
   1.8953724e+01  -2.7404824e+01   1.0000000e+02  -4.4847676e-01  -1.1284754e+01   1.1297208e+01
   1.9041259e+01  -2.7507052e+01   1.0000000e+02   3.5766268e-01  -1.1839786e+01   1.0024545e+01
   1.9132616e+01  -2.7606672e+01   1.0000000e+02   8.1700108e-01  -1.2197164e+01   8.2213699e+00
   1.9227705e+01  -2.7703575e+01   1.0000000e+02   8.2481363e-01  -1.2272101e+01   6.0602226e+00
   1.9326430e+01  -2.7797652e+01   1.0000000e+02   3.2673683e-01  -1.2018603e+01   3.7653264e+00
   1.9428692e+01  -2.7888798e+01   1.0000000e+02  -6.7350961e-01  -1.1445700e+01   1.5841982e+00
   1.9534387e+01  -2.7976912e+01   1.0000000e+02  -2.1107790e+00  -1.0626462e+01  -2.4636532e-01
   1.9643403e+01  -2.8061895e+01   1.0000000e+02  -3.8604280e+00  -9.6999722e+00  -1.5409854e+00
   1.9755629e+01  -2.8143652e+01   1.0000000e+02  -5.7508473e+00  -8.8601945e+00  -2.2142243e+00
   1.9870945e+01  -2.8222089e+01   1.0000000e+02  -7.5939847e+00  -8.3205089e+00  -2.3248641e+00
   1.9989228e+01  -2.8297119e+01   1.0000000e+02  -9.2348616e+00  -8.2530076e+00  -2.0881584e+00
   2.0110352e+01  -2.8368657e+01   1.0000000e+02  -1.0602638e+01  -8.7238536e+00  -1.8306251e+00
   2.0234185e+01  -2.8436620e+01   1.0000000e+02  -1.1732762e+01  -9.6570465e+00  -1.8927493e+00
   2.0360592e+01  -2.8500932e+01   1.0000000e+02  -1.2740205e+01  -1.0846075e+01  -2.5206156e+00
   2.0489434e+01  -2.8561520e+01   1.0000000e+02  -1.3755474e+01  -1.2007531e+01  -3.7932362e+00
   2.0620570e+01  -2.8618313e+01   1.0000000e+02  -1.4857178e+01  -1.2858834e+01  -5.6075637e+00
   2.0753853e+01  -2.8671247e+01   1.0000000e+02  -1.6030760e+01  -1.3201830e+01  -7.7229069e+00
   2.0889134e+01  -2.8720262e+01   1.0000000e+02  -1.7167951e+01  -1.2984035e+01  -9.8569195e+00
   2.1026261e+01  -2.8765300e+01   1.0000000e+02  -1.8106409e+01  -1.2300686e+01  -1.1799532e+01
   2.1165080e+01  -2.8806309e+01   1.0000000e+02  -1.8690817e+01  -1.1329183e+01  -1.3486113e+01
   2.1305433e+01  -2.8843244e+01   1.0000000e+02  -1.8822824e+01  -1.0235570e+01  -1.4992740e+01
   2.1447160e+01  -2.8876060e+01   1.0000000e+02  -1.8476096e+01  -9.1036672e+00  -1.6475100e+01
   2.1590100e+01  -2.8904720e+01   1.0000000e+02  -1.7681814e+01  -7.9005971e+00  -1.8099654e+01
   2.1734090e+01  -2.8929190e+01   1.0000000e+02  -1.6508267e+01  -6.4598858e+00  -1.9982851e+01
   2.1878962e+01  -2.8949443e+01   1.0000000e+02  -1.5046692e+01  -4.4834946e+00  -2.2110744e+01
   2.2024552e+01  -2.8965454e+01   1.0000000e+02  -1.3396019e+01  -1.6067912e+00  -2.4234740e+01
   2.2170691e+01  -2.8977206e+01   1.0000000e+02  -1.1647217e+01   2.4344741e+00  -2.5811759e+01
   2.2317210e+01  -2.8984684e+01   1.0000000e+02  -9.8826510e+00   7.5798545e+00  -2.6100491e+01
   2.2463940e+01  -2.8987880e+01   1.0000000e+02  -8.1949825e+00   1.3313344e+01  -2.4451839e+01
   2.2610713e+01  -2.8986789e+01   1.0000000e+02  -6.6974907e+00   1.8781945e+01  -2.0653495e+01
   2.2757357e+01  -2.8981415e+01   1.0000000e+02  -5.4988409e+00   2.3138969e+01  -1.5076157e+01
   2.2903704e+01  -2.8971761e+01   1.0000000e+02  -4.6575263e+00   2.5877295e+01  -8.5007682e+00
   2.3049584e+01  -2.8957841e+01   1.0000000e+02  -4.1613347e+00   2.6930863e+01  -1.7778934e+00
   2.3194830e+01  -2.8939670e+01   1.0000000e+02  -3.9507308e+00   2.6553669e+01   4.4357974e+00
   2.3339274e+01  -2.8917268e+01   1.0000000e+02  -3.9610611e+00   2.5134522e+01   9.7635847e+00
   2.4096253e+01  -2.8862791e+01   1.0000000e+02  -4.4198369e+00   1.2613250e+01   2.2974263e+01
   2.4232789e+01  -2.8815636e+01   1.0000000e+02  -4.8227911e+00   1.0645759e+01   2.3572579e+01
   2.4367451e+01  -2.8764641e+01   1.0000000e+02  -5.0884759e+00   8.9550497e+00   2.3876703e+01
   2.4500096e+01  -2.8709861e+01   1.0000000e+02  -5.2069253e+00   7.4920140e+00   2.4012613e+01
   2.4630585e+01  -2.8651355e+01   1.0000000e+02  -5.1958771e+00   6.1766284e+00   2.4039631e+01
   2.4758781e+01  -2.8589188e+01   1.0000000e+02  -5.0848403e+00   4.9455719e+00   2.3954214e+01
   2.4884551e+01  -2.8523425e+01   1.0000000e+02  -4.9021933e+00   3.7826335e+00   2.3728724e+01
   2.5007765e+01  -2.8454138e+01   1.0000000e+02  -4.6731626e+00   2.7155764e+00   2.3355840e+01
   2.5128297e+01  -2.8381402e+01   1.0000000e+02  -4.4277981e+00   1.7910025e+00   2.2871018e+01
   2.5246025e+01  -2.8305293e+01   1.0000000e+02  -4.2131488e+00   1.0463132e+00   2.2347432e+01
   2.5360828e+01  -2.8225895e+01   1.0000000e+02  -4.1024388e+00   4.8774724e-01   2.1868043e+01
   2.5472593e+01  -2.8143290e+01   1.0000000e+02  -4.1890107e+00   8.1548997e-02   2.1480123e+01
   2.5581209e+01  -2.8057568e+01   1.0000000e+02  -4.5547809e+00  -2.3075870e-01   2.1153189e+01
   2.5686569e+01  -2.7968819e+01   1.0000000e+02  -5.2243959e+00  -4.9601236e-01   2.0775511e+01
   2.5788570e+01  -2.7877136e+01   1.0000000e+02  -6.1352355e+00  -7.1745332e-01   2.0202978e+01
   2.5887114e+01  -2.7782618e+01   1.0000000e+02  -7.1459782e+00  -8.5165400e-01   1.9333408e+01
   2.5982109e+01  -2.7685362e+01   1.0000000e+02  -8.0805879e+00  -8.3542912e-01   1.8162346e+01
   2.6073464e+01  -2.7585471e+01   1.0000000e+02  -8.7849533e+00  -6.2291538e-01   1.6793724e+01
   2.6161095e+01  -2.7483050e+01   1.0000000e+02  -9.1752872e+00  -2.1070925e-01   1.5408263e+01
   2.6244923e+01  -2.7378205e+01   1.0000000e+02  -9.2691396e+00   3.5760650e-01   1.4206884e+01
   2.6324871e+01  -2.7271044e+01   1.0000000e+02  -9.1920237e+00   1.0040211e+00   1.3342674e+01
   2.6400870e+01  -2.7161679e+01   1.0000000e+02  -9.1464114e+00   1.6391562e+00   1.2858329e+01
   2.6472853e+01  -2.7050223e+01   1.0000000e+02  -9.3413429e+00   2.1872546e+00   1.2657741e+01
   2.6540758e+01  -2.6936789e+01   1.0000000e+02  -9.9098389e+00   2.6032290e+00   1.2532581e+01
   2.6604530e+01  -2.6821495e+01   1.0000000e+02  -1.0855486e+01   2.8782640e+00   1.2233513e+01
   2.6664117e+01  -2.6704458e+01   1.0000000e+02  -1.2051963e+01   3.0383079e+00   1.1552333e+01
   2.6719472e+01  -2.6585797e+01   1.0000000e+02  -1.3289462e+01   3.1379572e+00   1.0383933e+01
   2.6770551e+01  -2.6465632e+01   1.0000000e+02  -1.4344459e+01   3.2456850e+00   8.7513388e+00
   2.6817318e+01  -2.6344085e+01   1.0000000e+02  -1.5045016e+01   3.4189057e+00   6.7898381e+00
   2.6859740e+01  -2.6221278e+01   1.0000000e+02  -1.5310486e+01   3.6785610e+00   4.6998878e+00
   2.6897788e+01  -2.6097334e+01   1.0000000e+02  -1.5161366e+01   3.9964390e+00   2.6883521e+00
   2.6931439e+01  -2.5972378e+01   1.0000000e+02  -1.4706029e+01   4.3002281e+00   9.1167638e-01
   2.6960673e+01  -2.5846533e+01   1.0000000e+02  -1.4103681e+01   4.4932839e+00  -5.7107842e-01
   2.6985477e+01  -2.5719925e+01   1.0000000e+02  -1.3500087e+01   4.4821276e+00  -1.8158502e+00
   2.7005839e+01  -2.5592680e+01   1.0000000e+02  -1.2955210e+01   4.2026808e+00  -2.9567602e+00
   2.7021754e+01  -2.5464922e+01   1.0000000e+02  -1.2408387e+01   3.6380281e+00  -4.1148169e+00
   2.7033221e+01  -2.5336777e+01   1.0000000e+02  -1.1720271e+01   2.8234557e+00  -5.2978018e+00
   2.7040243e+01  -2.5208372e+01   1.0000000e+02  -1.0783001e+01   1.8382270e+00  -6.3636100e+00
   2.7042827e+01  -2.5079831e+01   1.0000000e+02  -9.6282294e+00   7.8902471e-01  -7.0922523e+00
   2.7040984e+01  -2.4951279e+01   1.0000000e+02  -8.4444122e+00  -2.0721502e-01  -7.3283555e+00
   2.7034731e+01  -2.4822841e+01   1.0000000e+02  -7.4824953e+00  -1.0369776e+00  -7.0862669e+00
   2.7024088e+01  -2.4694643e+01   1.0000000e+02  -6.9271559e+00  -1.5997075e+00  -6.5407722e+00
   2.7009076e+01  -2.4566806e+01   1.0000000e+02  -6.8291285e+00  -1.8146072e+00  -5.9310405e+00
   2.6989726e+01  -2.4439455e+01   1.0000000e+02  -7.1229098e+00  -1.6290110e+00  -5.4648173e+00
   2.6966067e+01  -2.4312712e+01   1.0000000e+02  -7.6846176e+00  -1.0316891e+00  -5.2782046e+00
   2.6938135e+01  -2.4186697e+01   1.0000000e+02  -8.3760953e+00  -6.5973330e-02  -5.4456109e+00
   2.6905970e+01  -2.4061531e+01   1.0000000e+02  -9.0562801e+00   1.1659644e+00  -5.9999639e+00
   2.6869613e+01  -2.3937333e+01   1.0000000e+02  -9.5771151e+00   2.5130222e+00  -6.9350434e+00
   2.6829112e+01  -2.3814220e+01   1.0000000e+02  -9.7877695e+00   3.7977649e+00  -8.1919869e+00
   2.6784515e+01  -2.3692310e+01   1.0000000e+02  -9.5550711e+00   4.8466190e+00  -9.6461545e+00
   2.6735876e+01  -2.3571717e+01   1.0000000e+02  -8.7964981e+00   5.5238220e+00  -1.1105520e+01
   2.6683251e+01  -2.3452554e+01   1.0000000e+02  -7.5212901e+00   5.7644764e+00  -1.2330522e+01
   2.6626700e+01  -2.3334934e+01   1.0000000e+02  -5.8613342e+00   5.5949262e+00  -1.3090204e+01
   2.6566286e+01  -2.3218967e+01   1.0000000e+02  -4.0571711e+00   5.1207129e+00  -1.3244861e+01
   2.6502074e+01  -2.3104761e+01   1.0000000e+02  -2.3882486e+00   4.4773158e+00  -1.2803502e+01
   2.6434133e+01  -2.2992422e+01   1.0000000e+02  -1.0875105e+00   3.7715259e+00  -1.1913571e+01
   2.6362536e+01  -2.2882056e+01   1.0000000e+02  -2.8703765e-01   3.0496676e+00  -1.0800196e+01
   2.6287357e+01  -2.2773764e+01   1.0000000e+02  -1.2630338e-03   2.3019753e+00  -9.6983209e+00
   2.6208673e+01  -2.2667647e+01   1.0000000e+02  -1.3487449e-01   1.4884790e+00  -8.7971383e+00
   2.6126565e+01  -2.2563803e+01   1.0000000e+02  -5.1336261e-01   5.7012071e-01  -8.1997121e+00
   2.6041115e+01  -2.2462328e+01   1.0000000e+02  -9.3567529e-01  -4.6585649e-01  -7.9082064e+00
   2.5952409e+01  -2.2363316e+01   1.0000000e+02  -1.2323230e+00  -1.5956989e+00  -7.8440949e+00
   2.5860534e+01  -2.2266857e+01   1.0000000e+02  -1.3034270e+00  -2.7691631e+00  -7.8933665e+00
   2.5765580e+01  -2.2173041e+01   1.0000000e+02  -1.1240453e+00  -3.9329414e+00  -7.9501312e+00
   2.5667641e+01  -2.2081952e+01   1.0000000e+02  -7.2469042e-01  -5.0522037e+00  -7.9386391e+00
   2.5566809e+01  -2.1993676e+01   1.0000000e+02  -1.6288016e-01  -6.1185428e+00  -7.8125666e+00
   2.5463183e+01  -2.1908291e+01   1.0000000e+02   5.0112146e-01  -7.1431005e+00  -7.5414534e+00
   2.5356861e+01  -2.1825877e+01   1.0000000e+02   1.2179780e+00  -8.1388109e+00  -7.0953784e+00
   2.5247944e+01  -2.1746508e+01   1.0000000e+02   1.9502017e+00  -9.0982620e+00  -6.4381202e+00
   2.5136533e+01  -2.1670257e+01   1.0000000e+02   2.6648508e+00  -9.9758073e+00  -5.5361442e+00
   2.5022735e+01  -2.1597193e+01   1.0000000e+02   3.3265764e+00  -1.0685544e+01  -4.3812616e+00
   2.4906654e+01  -2.1527383e+01   1.0000000e+02   3.8972339e+00  -1.1120043e+01  -3.0120236e+00
   2.4788398e+01  -2.1460889e+01   1.0000000e+02   4.3392257e+00  -1.1181614e+01  -1.5204464e+00
   2.4668077e+01  -2.1397772e+01   1.0000000e+02   4.6185467e+00  -1.0813922e+01  -4.4120359e-02
   2.4545802e+01  -2.1338090e+01   1.0000000e+02   4.7083601e+00  -1.0028336e+01   1.2522352e+00
   2.4421685e+01  -2.1281896e+01   1.0000000e+02   4.5951778e+00  -8.9195229e+00   2.2081952e+00
   2.4295839e+01  -2.1229241e+01   1.0000000e+02   4.2851803e+00  -7.6586817e+00   2.7108452e+00
   2.4168379e+01  -2.1180172e+01   1.0000000e+02   3.8046383e+00  -6.4563667e+00   2.7337619e+00
   2.4039421e+01  -2.1134735e+01   1.0000000e+02   3.1904514e+00  -5.5042715e+00   2.3482849e+00
   2.3909081e+01  -2.1092970e+01   1.0000000e+02   2.4745140e+00  -4.9219384e+00   1.6963632e+00
   2.3777478e+01  -2.1054914e+01   1.0000000e+02   1.6721394e+00  -4.7335571e+00   9.3721310e-01
   2.3644730e+01  -2.1020603e+01   1.0000000e+02   7.8282071e-01  -4.8831605e+00   1.9378095e-01
   2.3510958e+01  -2.0990066e+01   1.0000000e+02  -1.9654541e-01  -5.2779830e+00  -4.7665899e-01
   2.3376280e+01  -2.0963332e+01   1.0000000e+02  -1.2550958e+00  -5.8375244e+00  -1.0757823e+00
   2.3240818e+01  -2.0940424e+01   1.0000000e+02  -2.3603670e+00  -6.5226742e+00  -1.6280919e+00
   2.3104694e+01  -2.0921363e+01   1.0000000e+02  -3.4640032e+00  -7.3315280e+00  -2.1413944e+00
   2.2968029e+01  -2.0906167e+01   1.0000000e+02  -4.5140300e+00  -8.2722317e+00  -2.5911938e+00
   2.2830946e+01  -2.0894848e+01   1.0000000e+02  -5.4643161e+00  -9.3396936e+00  -2.9338768e+00
   2.2693567e+01  -2.0887418e+01   1.0000000e+02  -6.2788957e+00  -1.0513447e+01  -3.1278492e+00
   2.2556015e+01  -2.0883882e+01   1.0000000e+02  -6.9348816e+00  -1.1768973e+01  -3.1410036e+00
   2.2418413e+01  -2.0884244e+01   1.0000000e+02  -7.4260982e+00  -1.3084727e+01  -2.9440071e+00
   2.2280884e+01  -2.0888504e+01   1.0000000e+02  -7.7646332e+00  -1.4439229e+01  -2.5040155e+00
   2.2143550e+01  -2.0896658e+01   1.0000000e+02  -7.9759172e+00  -1.5806453e+01  -1.7851555e+00
   2.2006536e+01  -2.0908698e+01   1.0000000e+02  -8.0872065e+00  -1.7152808e+01  -7.5027209e-01
   2.1869962e+01  -2.0924614e+01   1.0000000e+02  -8.1153823e+00  -1.8430678e+01   6.3743166e-01
   2.1733952e+01  -2.0944391e+01   1.0000000e+02  -8.0617334e+00  -1.9567980e+01   2.4060125e+00
   2.1598626e+01  -2.0968012e+01   1.0000000e+02  -7.9166211e+00  -2.0462282e+01   4.5571312e+00
   2.1464108e+01  -2.0995455e+01   1.0000000e+02  -7.6696762e+00  -2.0987655e+01   7.0437417e+00
   2.1330516e+01  -2.1026695e+01   1.0000000e+02  -7.3191756e+00  -2.1018659e+01   9.7528031e+00
   2.1197972e+01  -2.1061705e+01   1.0000000e+02  -6.8778669e+00  -2.0469675e+01   1.2505100e+01
   2.1066595e+01  -2.1100453e+01   1.0000000e+02  -6.3748154e+00  -1.9336082e+01   1.5085866e+01
   2.0936503e+01  -2.1142903e+01   1.0000000e+02  -5.8518033e+00  -1.7710672e+01   1.7303164e+01
   2.0807815e+01  -2.1189019e+01   1.0000000e+02  -5.3526943e+00  -1.5757328e+01   1.9044438e+01
   2.0680646e+01  -2.1238757e+01   1.0000000e+02  -4.9089594e+00  -1.3655674e+01   2.0295437e+01
   2.0555112e+01  -2.1292074e+01   1.0000000e+02  -4.5300924e+00  -1.1552272e+01   2.1114368e+01
   2.0431329e+01  -2.1348920e+01   1.0000000e+02  -4.2046854e+00  -9.5417544e+00   2.1587776e+01
   2.0309409e+01  -2.1409245e+01   1.0000000e+02  -3.9105842e+00  -7.6726193e+00   2.1797793e+01
   2.0189464e+01  -2.1472994e+01   1.0000000e+02  -3.6271525e+00  -5.9609147e+00   2.1809234e+01
   2.0071604e+01  -2.1540108e+01   1.0000000e+02  -3.3439372e+00  -4.4021634e+00   2.1669350e+01
   1.9955939e+01  -2.1610529e+01   1.0000000e+02  -3.0631094e+00  -2.9813428e+00   2.1412467e+01
   1.9842576e+01  -2.1684190e+01   1.0000000e+02  -2.7959763e+00  -1.6821743e+00   2.1066286e+01
   1.9731622e+01  -2.1761026e+01   1.0000000e+02  -2.5560506e+00  -4.9483516e-01   2.0659481e+01
   1.9623179e+01  -2.1840966e+01   1.0000000e+02  -2.3495355e+00   5.8083265e-01   2.0229052e+01
   1.9517350e+01  -2.1923938e+01   1.0000000e+02  -2.1653052e+00   1.5391200e+00   1.9821943e+01
   1.9414236e+01  -2.2009866e+01   1.0000000e+02  -1.9693514e+00   2.3760325e+00   1.9485384e+01
   1.9313935e+01  -2.2098672e+01   1.0000000e+02  -1.7102979e+00   3.0935500e+00   1.9249530e+01
   1.9216543e+01  -2.2190274e+01   1.0000000e+02  -1.3362766e+00   3.6964279e+00   1.9114663e+01
   1.9122155e+01  -2.2284588e+01   1.0000000e+02  -8.1400105e-01   4.1848549e+00   1.9053457e+01
   1.9030862e+01  -2.2381528e+01   1.0000000e+02  -1.3823690e-01   4.5503026e+00   1.9026320e+01
   1.8942755e+01  -2.2481005e+01   1.0000000e+02   6.7181778e-01   4.7785533e+00   1.8998206e+01
   1.8857919e+01  -2.2582927e+01   1.0000000e+02   1.5835444e+00   4.8578120e+00   1.8947170e+01
   1.8776441e+01  -2.2687201e+01   1.0000000e+02   2.5609312e+00   4.7873368e+00   1.8863388e+01
   1.8698403e+01  -2.2793729e+01   1.0000000e+02   3.5690020e+00   4.5822440e+00   1.8742674e+01
   1.8623884e+01  -2.2902414e+01   1.0000000e+02   4.5736011e+00   4.2727152e+00   1.8580826e+01
   1.8552961e+01  -2.3013155e+01   1.0000000e+02   5.5400253e+00   3.8986380e+00   1.8371307e+01
   1.8485708e+01  -2.3125849e+01   1.0000000e+02   6.4323035e+00   3.5023856e+00   1.8106185e+01
   1.8422197e+01  -2.3240390e+01   1.0000000e+02   7.2134415e+00   3.1216692e+00   1.7779796e+01
   1.8362495e+01  -2.3356673e+01   1.0000000e+02   7.8484002e+00   2.7831721e+00   1.7394255e+01
   1.8306669e+01  -2.3474588e+01   1.0000000e+02   8.3109328e+00   2.4977821e+00   1.6964111e+01
   1.8254781e+01  -2.3594025e+01   1.0000000e+02   8.5917184e+00   2.2585753e+00   1.6517015e+01
   1.8206889e+01  -2.3714872e+01   1.0000000e+02   8.7031641e+00   2.0426298e+00   1.6090423e+01
   1.8163049e+01  -2.3837014e+01   1.0000000e+02   8.6793000e+00   1.8167378e+00   1.5725922e+01
   1.8123314e+01  -2.3960337e+01   1.0000000e+02   8.5718560e+00   1.5458973e+00   1.5461731e+01
   1.8087733e+01  -2.4084724e+01   1.0000000e+02   8.4436944e+00   1.2030249e+00   1.5323653e+01
   1.8056352e+01  -2.4210057e+01   1.0000000e+02   8.3601498e+00   7.7813997e-01   1.5315551e+01
   1.8029211e+01  -2.4336217e+01   1.0000000e+02   8.3780114e+00   2.8395738e-01   1.5410826e+01
   1.8006351e+01  -2.4463082e+01   1.0000000e+02   8.5314705e+00  -2.4641858e-01   1.5548489e+01
   1.7987804e+01  -2.4590533e+01   1.0000000e+02   8.8169719e+00  -7.7059255e-01   1.5640786e+01
   1.7973603e+01  -2.4718446e+01   1.0000000e+02   9.1864194e+00  -1.2519873e+00   1.5597202e+01
   1.7963774e+01  -2.4846698e+01   1.0000000e+02   9.5605095e+00  -1.6708478e+00   1.5355597e+01
   1.7958339e+01  -2.4975166e+01   1.0000000e+02   9.8604578e+00  -2.0270651e+00   1.4897838e+01
   1.7957318e+01  -2.5103725e+01   1.0000000e+02   1.0035193e+01  -2.3368261e+00   1.4236569e+01
   1.7960726e+01  -2.5232251e+01   1.0000000e+02   1.0061394e+01  -2.6271525e+00   1.3388420e+01
   1.7968574e+01  -2.5360618e+01   1.0000000e+02   9.9204749e+00  -2.9295339e+00   1.2362161e+01
   1.7980868e+01  -2.5488700e+01   1.0000000e+02   9.5778302e+00  -3.2715853e+00   1.1171567e+01
   1.7997609e+01  -2.5616372e+01   1.0000000e+02   8.9828950e+00  -3.6682345e+00   9.8582458e+00
   1.8018797e+01  -2.5743509e+01   1.0000000e+02   8.0887789e+00  -4.1169890e+00   8.5049348e+00
   1.8044425e+01  -2.5869984e+01   1.0000000e+02   6.8788909e+00  -4.5997470e+00   7.2300443e+00
   1.8074481e+01  -2.5995673e+01   1.0000000e+02   5.3864470e+00  -5.0890558e+00   6.1652642e+00
   1.8108951e+01  -2.6120450e+01   1.0000000e+02   3.6971132e+00  -5.5540129e+00   5.4268426e+00
   1.8147814e+01  -2.6244192e+01   1.0000000e+02   1.9345777e+00  -5.9641997e+00   5.0935233e+00
   1.8191046e+01  -2.6366774e+01   1.0000000e+02   2.3792336e-01  -6.2938797e+00   5.1981277e+00
   1.8238617e+01  -2.6488074e+01   1.0000000e+02  -1.2594043e+00  -6.5283549e+00   5.7307138e+00
   1.8290494e+01  -2.6607968e+01   1.0000000e+02  -2.4423978e+00  -6.6723029e+00   6.6450203e+00
   1.8346639e+01  -2.6726337e+01   1.0000000e+02  -3.2201591e+00  -6.7547881e+00   7.8591679e+00
   1.8407007e+01  -2.6843059e+01   1.0000000e+02  -3.5316336e+00  -6.8251239e+00   9.2496783e+00
   1.8471551e+01  -2.6958016e+01   1.0000000e+02  -3.3582144e+00  -6.9395623e+00   1.0649548e+01
   1.8540219e+01  -2.7071091e+01   1.0000000e+02  -2.7394345e+00  -7.1454777e+00   1.1863818e+01
   1.8612953e+01  -2.7182167e+01   1.0000000e+02  -1.7771600e+00  -7.4703928e+00   1.2703565e+01
   1.8689691e+01  -2.7291131e+01   1.0000000e+02  -6.1897963e-01  -7.9166416e+00   1.3020276e+01
   1.8770366e+01  -2.7397869e+01   1.0000000e+02   5.6862608e-01  -8.4569934e+00   1.2724156e+01
   1.8854906e+01  -2.7502272e+01   1.0000000e+02   1.6214652e+00  -9.0309575e+00   1.1789876e+01
   1.8943236e+01  -2.7604231e+01   1.0000000e+02   2.3899380e+00  -9.5488733e+00   1.0260196e+01
   1.9035274e+01  -2.7703640e+01   1.0000000e+02   2.7492796e+00  -9.9079895e+00   8.2481425e+00
   1.9130935e+01  -2.7800395e+01   1.0000000e+02   2.6112048e+00  -1.0016790e+01   5.9315861e+00
   1.9230129e+01  -2.7894394e+01   1.0000000e+02   1.9358717e+00  -9.8191686e+00   3.5368190e+00
   1.9332762e+01  -2.7985538e+01   1.0000000e+02   7.4083237e-01  -9.3124283e+00   1.3120499e+00
   1.9438735e+01  -2.8073732e+01   1.0000000e+02  -8.9574206e-01  -8.5575112e+00  -5.0594586e-01
   1.9547944e+01  -2.8158881e+01   1.0000000e+02  -2.8388373e+00  -7.6823719e+00  -1.7311878e+00
   1.9660282e+01  -2.8240897e+01   1.0000000e+02  -4.9107021e+00  -6.8732965e+00  -2.2753203e+00
   1.9775638e+01  -2.8319690e+01   1.0000000e+02  -6.9219097e+00  -6.3424871e+00  -2.1919541e+00
   1.9893896e+01  -2.8395178e+01   1.0000000e+02  -8.7206611e+00  -6.2679270e+00  -1.6900603e+00
   2.0014936e+01  -2.8467279e+01   1.0000000e+02  -1.0242609e+01  -6.7279082e+00  -1.0878486e+00
   2.0138635e+01  -2.8535917e+01   1.0000000e+02  -1.1529135e+01  -7.6666396e+00  -7.1511533e-01
   2.0264866e+01  -2.8601016e+01   1.0000000e+02  -1.2695738e+01  -8.9097324e+00  -8.1303576e-01
   2.0393498e+01  -2.8662508e+01   1.0000000e+02  -1.3867813e+01  -1.0214827e+01  -1.4780340e+00
   2.0524398e+01  -2.8720326e+01   1.0000000e+02  -1.5119585e+01  -1.1333707e+01  -2.6586702e+00
   2.0657429e+01  -2.8774407e+01   1.0000000e+02  -1.6441443e+01  -1.2074389e+01  -4.1915354e+00
   2.0792450e+01  -2.8824692e+01   1.0000000e+02  -1.7742932e+01  -1.2353018e+01  -5.8676360e+00
   2.0929318e+01  -2.8871127e+01   1.0000000e+02  -1.8887566e+01  -1.2210152e+01  -7.5161522e+00
   2.1067889e+01  -2.8913662e+01   1.0000000e+02  -1.9743496e+01  -1.1772732e+01  -9.0687503e+00
   2.1208013e+01  -2.8952250e+01   1.0000000e+02  -2.0222993e+01  -1.1181321e+01  -1.0568682e+01
   2.1349541e+01  -2.8986849e+01   1.0000000e+02  -2.0291631e+01  -1.0525184e+01  -1.2131695e+01
   2.1492320e+01  -2.9017421e+01   1.0000000e+02  -1.9954188e+01  -9.8049423e+00  -1.3897266e+01
   2.1636196e+01  -2.9043932e+01   1.0000000e+02  -1.9240585e+01  -8.9089964e+00  -1.5987228e+01
   2.1781013e+01  -2.9066355e+01   1.0000000e+02  -1.8200842e+01  -7.5980555e+00  -1.8447264e+01
   2.1926614e+01  -2.9084663e+01   1.0000000e+02  -1.6895043e+01  -5.5294259e+00  -2.1154930e+01
   2.2072840e+01  -2.9098837e+01   1.0000000e+02  -1.5370277e+01  -2.3606874e+00  -2.3731174e+01
   2.2219533e+01  -2.9108862e+01   1.0000000e+02  -1.3646143e+01   2.0698618e+00  -2.5535237e+01
   2.2366531e+01  -2.9114726e+01   1.0000000e+02  -1.1739574e+01   7.5565243e+00  -2.5813829e+01
   2.2513676e+01  -2.9116423e+01   1.0000000e+02  -9.7177957e+00   1.3466396e+01  -2.3996762e+01
   2.2660805e+01  -2.9113951e+01   1.0000000e+02  -7.7237651e+00   1.8910986e+01  -1.9991642e+01
   2.2807759e+01  -2.9107313e+01   1.0000000e+02  -5.9374304e+00   2.3088943e+01  -1.4264131e+01
   2.2954377e+01  -2.9096516e+01   1.0000000e+02  -4.5037944e+00   2.5573684e+01  -7.6335219e+00
   2.3100500e+01  -2.9081572e+01   1.0000000e+02  -3.4879624e+00   2.6373028e+01  -9.4377889e-01
   2.3245967e+01  -2.9062498e+01   1.0000000e+02  -2.8813472e+00   2.5793822e+01   5.1763824e+00
   2.3390621e+01  -2.9039314e+01   1.0000000e+02  -2.6350473e+00   2.4253879e+01   1.0389085e+01
   2.3534304e+01  -2.9012045e+01   1.0000000e+02  -2.6872368e+00   2.2139365e+01   1.4599680e+01
   2.3676862e+01  -2.8980722e+01   1.0000000e+02  -2.9714200e+00   1.9740552e+01   1.7856068e+01
   2.3818141e+01  -2.8945379e+01   1.0000000e+02  -3.4125674e+00   1.7258673e+01   2.0258705e+01
   2.3957988e+01  -2.8906054e+01   1.0000000e+02  -3.9248703e+00   1.4843287e+01   2.1921249e+01
   2.4700234e+01  -2.8764147e+01   1.0000000e+02  -3.5575864e+00   4.5227779e+00   2.4472990e+01
   2.4828699e+01  -2.8701863e+01   1.0000000e+02  -3.4517337e+00   3.1869545e+00   2.4205208e+01
   2.4954798e+01  -2.8636081e+01   1.0000000e+02  -3.3109419e+00   1.9744297e+00   2.3740638e+01
   2.5078409e+01  -2.8566866e+01   1.0000000e+02  -3.1533184e+00   9.2477413e-01   2.3094862e+01
   2.5199411e+01  -2.8494290e+01   1.0000000e+02  -2.9907396e+00   8.5108691e-02   2.2329415e+01
   2.5317689e+01  -2.8418426e+01   1.0000000e+02  -2.8432055e+00  -5.1378208e-01   2.1546344e+01
   2.5433129e+01  -2.8339351e+01   1.0000000e+02  -2.7554408e+00  -8.7752527e-01   2.0864737e+01
   2.5545622e+01  -2.8257145e+01   1.0000000e+02  -2.8038053e+00  -1.0595946e+00   2.0375749e+01
   2.5655063e+01  -2.8171890e+01   1.0000000e+02  -3.0771663e+00  -1.1475607e+00   2.0089317e+01
   2.5761351e+01  -2.8083672e+01   1.0000000e+02  -3.6331890e+00  -1.2210734e+00   1.9911987e+01
   2.5864388e+01  -2.7992580e+01   1.0000000e+02  -4.4574953e+00  -1.3085947e+00   1.9682502e+01
   2.5964080e+01  -2.7898703e+01   1.0000000e+02  -5.4542579e+00  -1.3754691e+00   1.9246641e+01
   2.6060338e+01  -2.7802136e+01   1.0000000e+02  -6.4734022e+00  -1.3503456e+00   1.8525771e+01
   2.6153076e+01  -2.7702974e+01   1.0000000e+02  -7.3575456e+00  -1.1685803e+00   1.7544766e+01
   2.6242214e+01  -2.7601315e+01   1.0000000e+02  -7.9869739e+00  -8.0375528e-01   1.6417091e+01
   2.6327675e+01  -2.7497260e+01   1.0000000e+02  -8.3137859e+00  -2.7441992e-01   1.5306846e+01
   2.6409385e+01  -2.7390910e+01   1.0000000e+02  -8.3846429e+00   3.6680200e-01   1.4381563e+01
   2.6487277e+01  -2.7282370e+01   1.0000000e+02  -8.3428577e+00   1.0499551e+00   1.3758114e+01
   2.6561286e+01  -2.7171746e+01   1.0000000e+02  -8.3939195e+00   1.7039832e+00   1.3451995e+01
   2.6631354e+01  -2.7059144e+01   1.0000000e+02  -8.7344926e+00   2.2696362e+00   1.3354476e+01
   2.6697424e+01  -2.6944675e+01   1.0000000e+02  -9.4728216e+00   2.7091788e+00   1.3256814e+01
   2.6759446e+01  -2.6828448e+01   1.0000000e+02  -1.0579628e+01   3.0152085e+00   1.2917760e+01
   2.6817373e+01  -2.6710576e+01   1.0000000e+02  -1.1894005e+01   3.2172967e+00   1.2148494e+01
   2.6871163e+01  -2.6591172e+01   1.0000000e+02  -1.3181978e+01   3.3783062e+00   1.0880091e+01
   2.6920779e+01  -2.6470349e+01   1.0000000e+02  -1.4220279e+01   3.5724588e+00   9.1835278e+00
   2.6966186e+01  -2.6348224e+01   1.0000000e+02  -1.4865237e+01   3.8520420e+00   7.2344204e+00
   2.7007356e+01  -2.6224910e+01   1.0000000e+02  -1.5080848e+01   4.2226931e+00   5.2461149e+00
   2.7044263e+01  -2.6100527e+01   1.0000000e+02  -1.4931251e+01   4.6398710e+00   3.4044447e+00
   2.7076887e+01  -2.5975189e+01   1.0000000e+02  -1.4553828e+01   5.0235639e+00   1.8169540e+00
   2.7105211e+01  -2.5849016e+01   1.0000000e+02  -1.4114303e+01   5.2820044e+00   4.8028440e-01
   2.7129222e+01  -2.5722126e+01   1.0000000e+02  -1.3741157e+01   5.3362491e+00  -7.2070478e-01
   2.7148913e+01  -2.5594636e+01   1.0000000e+02  -1.3458161e+01   5.1389255e+00  -1.9615583e+00
   2.7164279e+01  -2.5466666e+01   1.0000000e+02  -1.3158653e+01   4.6831668e+00  -3.3776422e+00
   2.7175320e+01  -2.5338334e+01   1.0000000e+02  -1.2659018e+01   4.0004703e+00  -4.9616147e+00
   2.7182040e+01  -2.5209758e+01   1.0000000e+02  -1.1818323e+01   3.1507655e+00  -6.5327202e+00
   2.7184445e+01  -2.5081057e+01   1.0000000e+02  -1.0648928e+01   2.2134610e+00  -7.8188386e+00
   2.7182549e+01  -2.4952349e+01   1.0000000e+02  -9.3321759e+00   1.2846745e+00  -8.6071014e+00
   2.7176365e+01  -2.4823752e+01   1.0000000e+02  -8.1231137e+00   4.7422709e-01  -8.8553884e+00
   2.7165913e+01  -2.4695383e+01   1.0000000e+02  -7.2208189e+00  -1.0526583e-01  -8.6889717e+00
   2.7151215e+01  -2.4567359e+01   1.0000000e+02  -6.6996819e+00  -3.5584794e-01  -8.3065709e+00
   2.7132298e+01  -2.4439796e+01   1.0000000e+02  -6.5293144e+00  -2.1214585e-01  -7.8845501e+00
   2.7109191e+01  -2.4312809e+01   1.0000000e+02  -6.6352766e+00   3.4287367e-01  -7.5416789e+00
   2.7081927e+01  -2.4186513e+01   1.0000000e+02  -6.9394720e+00   1.2672819e+00  -7.3573813e+00
   2.7050544e+01  -2.4061021e+01   1.0000000e+02  -7.3605622e+00   2.4589812e+00  -7.3969793e+00
   2.7015080e+01  -2.3936446e+01   1.0000000e+02  -7.7968622e+00   3.7659523e+00  -7.7123999e+00
   2.6975579e+01  -2.3812898e+01   1.0000000e+02  -8.1193155e+00   5.0078907e+00  -8.3222816e+00
   2.6932088e+01  -2.3690489e+01   1.0000000e+02  -8.1831617e+00   6.0071646e+00  -9.1891753e+00
   2.6884655e+01  -2.3569327e+01   1.0000000e+02  -7.8558156e+00   6.6250218e+00  -1.0203347e+01
   2.6833334e+01  -2.3449519e+01   1.0000000e+02  -7.0616738e+00   6.7944070e+00  -1.1180148e+01
   2.6778179e+01  -2.3331172e+01   1.0000000e+02  -5.8348844e+00   6.5380068e+00  -1.1890508e+01
   2.6719250e+01  -2.3214390e+01   1.0000000e+02  -4.3440233e+00   5.9596214e+00  -1.2135773e+01
   2.6656606e+01  -2.3099276e+01   1.0000000e+02  -2.8538681e+00   5.2039910e+00  -1.1834319e+01
   2.6590313e+01  -2.2985930e+01   1.0000000e+02  -1.6378751e+00   4.4001727e+00  -1.1060887e+01
   2.6520437e+01  -2.2874454e+01   1.0000000e+02  -8.9338727e-01   3.6178383e+00  -1.0016751e+01
   2.6447046e+01  -2.2764942e+01   1.0000000e+02  -6.9321224e-01   2.8559866e+00  -8.9583822e+00
   2.6370214e+01  -2.2657493e+01   1.0000000e+02  -9.7488661e-01   2.0616681e+00  -8.1193536e+00
   2.6290014e+01  -2.2552199e+01   1.0000000e+02  -1.5638881e+00   1.1651761e+00  -7.6443830e+00
   2.6206523e+01  -2.2449151e+01   1.0000000e+02  -2.2293759e+00   1.1794787e-01  -7.5532859e+00
   2.6119820e+01  -2.2348440e+01   1.0000000e+02  -2.7569753e+00  -1.0810347e+00  -7.7504334e+00
   2.6029986e+01  -2.2250152e+01   1.0000000e+02  -3.0081482e+00  -2.3821095e+00  -8.0771315e+00
   2.5937105e+01  -2.2154373e+01   1.0000000e+02  -2.9407327e+00  -3.7063945e+00  -8.3784664e+00
   2.5841262e+01  -2.2061186e+01   1.0000000e+02  -2.5907760e+00  -4.9789164e+00  -8.5495932e+00
   2.5742546e+01  -2.1970670e+01   1.0000000e+02  -2.0354958e+00  -6.1549213e+00  -8.5462428e+00
   2.5641045e+01  -2.1882904e+01   1.0000000e+02  -1.3575152e+00  -7.2285892e+00  -8.3669932e+00
   2.5536852e+01  -2.1797963e+01   1.0000000e+02  -6.2159275e-01  -8.2238420e+00  -8.0238733e+00
   2.5430060e+01  -2.1715921e+01   1.0000000e+02   1.3335207e-01  -9.1722431e+00  -7.5161458e+00
   2.5320763e+01  -2.1636847e+01   1.0000000e+02   8.8841567e-01  -1.0085279e+01  -6.8188898e+00
   2.5209060e+01  -2.1560809e+01   1.0000000e+02   1.6312228e+00  -1.0931342e+01  -5.8929713e+00
   2.5095048e+01  -2.1487873e+01   1.0000000e+02   2.3438937e+00  -1.1630288e+01  -4.7118439e+00
   2.4978827e+01  -2.1418100e+01   1.0000000e+02   2.9976074e+00  -1.2070707e+01  -3.2891492e+00
   2.4860499e+01  -2.1351551e+01   1.0000000e+02   3.5525947e+00  -1.2141468e+01  -1.6935509e+00
   2.4740167e+01  -2.1288282e+01   1.0000000e+02   3.9618756e+00  -1.1765296e+01  -4.9613417e-02
   2.4617936e+01  -2.1228348e+01   1.0000000e+02   4.1797192e+00  -1.0928183e+01   1.4736319e+00
   2.4493910e+01  -2.1171798e+01   1.0000000e+02   4.1734924e+00  -9.7011411e+00   2.6907852e+00
   2.4368197e+01  -2.1118682e+01   1.0000000e+02   3.9344481e+00  -8.2437827e+00   3.4467126e+00
   2.4240904e+01  -2.1069044e+01   1.0000000e+02   3.4820121e+00  -6.7755761e+00   3.6684119e+00
   2.4112140e+01  -2.1022927e+01   1.0000000e+02   2.8572973e+00  -5.5157952e+00   3.3930106e+00
   2.3982015e+01  -2.0980369e+01   1.0000000e+02   2.1071549e+00  -4.6185192e+00   2.7505973e+00
   2.3850640e+01  -2.0941408e+01   1.0000000e+02   1.2676710e+00  -4.1369937e+00   1.9089828e+00
   2.3718127e+01  -2.0906075e+01   1.0000000e+02   3.5748233e-01  -4.0329654e+00   1.0109612e+00
   2.3584587e+01  -2.0874402e+01   1.0000000e+02  -6.1485854e-01  -4.2208616e+00   1.3587519e-01
   2.3450134e+01  -2.0846414e+01   1.0000000e+02  -1.6361832e+00  -4.6198481e+00  -6.9873523e-01
   2.3314881e+01  -2.0822136e+01   1.0000000e+02  -2.6791145e+00  -5.1867665e+00  -1.5039537e+00
   2.3178943e+01  -2.0801588e+01   1.0000000e+02  -3.7043098e+00  -5.9172134e+00  -2.2802210e+00
   2.3042434e+01  -2.0784787e+01   1.0000000e+02  -4.6692756e+00  -6.8225898e+00  -2.9972894e+00
   2.2905469e+01  -2.0771748e+01   1.0000000e+02  -5.5347421e+00  -7.9042725e+00  -3.6012528e+00
   2.2768162e+01  -2.0762482e+01   1.0000000e+02  -6.2665571e+00  -9.1431732e+00  -4.0354552e+00
   2.2630631e+01  -2.0756996e+01   1.0000000e+02  -6.8379105e+00  -1.0505654e+01  -4.2550023e+00
   2.2492990e+01  -2.0755296e+01   1.0000000e+02  -7.2355201e+00  -1.1953266e+01  -4.2272686e+00
   2.2355354e+01  -2.0757382e+01   1.0000000e+02  -7.4662947e+00  -1.3446903e+01  -3.9269511e+00
   2.2217840e+01  -2.0763253e+01   1.0000000e+02  -7.5575755e+00  -1.4948925e+01  -3.3339587e+00
   2.2080563e+01  -2.0772904e+01   1.0000000e+02  -7.5477804e+00  -1.6426745e+01  -2.4304216e+00
   2.1943639e+01  -2.0786326e+01   1.0000000e+02  -7.4713064e+00  -1.7850353e+01  -1.1928199e+00
   2.1807183e+01  -2.0803510e+01   1.0000000e+02  -7.3459527e+00  -1.9177280e+01   4.1156450e-01
   2.1671309e+01  -2.0824438e+01   1.0000000e+02  -7.1697497e+00  -2.0333318e+01   2.4117232e+00
   2.1536133e+01  -2.0849095e+01   1.0000000e+02  -6.9280242e+00  -2.1205438e+01   4.8050073e+00
   2.1401768e+01  -2.0877460e+01   1.0000000e+02  -6.6046362e+00  -2.1656743e+01   7.5277627e+00
   2.1268327e+01  -2.0909507e+01   1.0000000e+02  -6.1915155e+00  -2.1561748e+01   1.0439537e+01
   2.1135925e+01  -2.0945211e+01   1.0000000e+02  -5.6951142e+00  -2.0852283e+01   1.3333295e+01
   2.1004672e+01  -2.0984540e+01   1.0000000e+02  -5.1400880e+00  -1.9554383e+01   1.5978555e+01
   2.0874681e+01  -2.1027462e+01   1.0000000e+02  -4.5680710e+00  -1.7791516e+01   1.8185079e+01
   2.0746062e+01  -2.1073939e+01   1.0000000e+02  -4.0277647e+00  -1.5746457e+01   1.9854554e+01
   2.0618925e+01  -2.1123933e+01   1.0000000e+02  -3.5586775e+00  -1.3603831e+01   2.0990591e+01
   2.0493378e+01  -2.1177402e+01   1.0000000e+02  -3.1771152e+00  -1.1506631e+01   2.1668397e+01
   2.0369531e+01  -2.1234298e+01   1.0000000e+02  -2.8729689e+00  -9.5423861e+00   2.1990612e+01
   2.0247488e+01  -2.1294575e+01   1.0000000e+02  -2.6179728e+00  -7.7501068e+00   2.2053994e+01
   2.0127355e+01  -2.1358180e+01   1.0000000e+02  -2.3796655e+00  -6.1339028e+00   2.1932824e+01
   2.0009238e+01  -2.1425060e+01   1.0000000e+02  -2.1343402e+00  -4.6768740e+00   2.1674496e+01
   1.9893237e+01  -2.1495158e+01   1.0000000e+02  -1.8739727e+00  -3.3547112e+00   2.1303705e+01
   1.9779456e+01  -2.1568413e+01   1.0000000e+02  -1.6063160e+00  -2.1471761e+00   2.0832348e+01
   1.9667993e+01  -2.1644763e+01   1.0000000e+02  -1.3500872e+00  -1.0453698e+00   2.0272351e+01
   1.9558947e+01  -2.1724142e+01   1.0000000e+02  -1.1265199e+00  -5.3269612e-02   1.9649000e+01
   1.9452415e+01  -2.1806483e+01   1.0000000e+02  -9.4721151e-01   8.1828987e-01   1.9008655e+01
   1.9348492e+01  -2.1891715e+01   1.0000000e+02  -8.0210621e-01   1.5621306e+00   1.8413213e+01
   1.9247271e+01  -2.1979765e+01   1.0000000e+02  -6.5584647e-01   2.1826214e+00   1.7920853e+01
   1.9148843e+01  -2.2070556e+01   1.0000000e+02  -4.5825011e-01   2.6946662e+00   1.7563968e+01
   1.9053298e+01  -2.2164012e+01   1.0000000e+02  -1.6451193e-01   3.1143027e+00   1.7339917e+01
   1.8960724e+01  -2.2260050e+01   1.0000000e+02   2.4841868e-01   3.4486416e+00   1.7220543e+01
   1.8871205e+01  -2.2358588e+01   1.0000000e+02   7.7899732e-01   3.6931829e+00   1.7171142e+01
   1.8784825e+01  -2.2459542e+01   1.0000000e+02   1.4100908e+00   3.8374525e+00   1.7164952e+01
   1.8701666e+01  -2.2562822e+01   1.0000000e+02   2.1209334e+00   3.8749632e+00   1.7186213e+01
   1.8621805e+01  -2.2668340e+01   1.0000000e+02   2.8936072e+00   3.8117626e+00   1.7223667e+01
   1.8545320e+01  -2.2776004e+01   1.0000000e+02   3.7115223e+00   3.6687069e+00   1.7262144e+01
   1.8472284e+01  -2.2885720e+01   1.0000000e+02   4.5545847e+00   3.4773095e+00   1.7279242e+01
   1.8402770e+01  -2.2997391e+01   1.0000000e+02   5.3960803e+00   3.2730618e+00   1.7247578e+01
   1.8336845e+01  -2.3110921e+01   1.0000000e+02   6.2017229e+00   3.0889348e+00   1.7139214e+01
   1.8274577e+01  -2.3226210e+01   1.0000000e+02   6.9297956e+00   2.9489619e+00   1.6931763e+01
   1.8216029e+01  -2.3343157e+01   1.0000000e+02   7.5349325e+00   2.8619818e+00   1.6616812e+01
   1.8161262e+01  -2.3461657e+01   1.0000000e+02   7.9775079e+00   2.8183501e+00   1.6207650e+01
   1.8110335e+01  -2.3581608e+01   1.0000000e+02   8.2352323e+00   2.7921814e+00   1.5741280e+01
   1.8063301e+01  -2.3702902e+01   1.0000000e+02   8.3109325e+00   2.7489275e+00   1.5273421e+01
   1.8020214e+01  -2.3825432e+01   1.0000000e+02   8.2342609e+00   2.6551511e+00   1.4868680e+01
   1.7981122e+01  -2.3949089e+01   1.0000000e+02   8.0588266e+00   2.4871483e+00   1.4588128e+01
   1.7946072e+01  -2.4073763e+01   1.0000000e+02   7.8568766e+00   2.2373044e+00   1.4475253e+01
   1.7915107e+01  -2.4199342e+01   1.0000000e+02   7.7103837e+00   1.9183798e+00   1.4540567e+01
   1.7888265e+01  -2.4325714e+01   1.0000000e+02   7.6954126e+00   1.5631321e+00   1.4748580e+01
   1.7865583e+01  -2.4452765e+01   1.0000000e+02   7.8599078e+00   1.2156660e+00   1.5015288e+01
   1.7847095e+01  -2.4580380e+01   1.0000000e+02   8.2022627e+00   9.1594727e-01   1.5224436e+01
   1.7832828e+01  -2.4708444e+01   1.0000000e+02   8.6643413e+00   6.8526838e-01   1.5262322e+01
   1.7822810e+01  -2.4836842e+01   1.0000000e+02   9.1499158e+00   5.2032519e-01   1.5055502e+01
   1.7817062e+01  -2.4965456e+01   1.0000000e+02   9.5621317e+00   3.9722822e-01   1.4586815e+01
   1.7815603e+01  -2.5094168e+01   1.0000000e+02   9.8344332e+00   2.7975882e-01   1.3879672e+01
   1.7818447e+01  -2.5222862e+01   1.0000000e+02   9.9330515e+00   1.2725479e-01   1.2968944e+01
   1.7825607e+01  -2.5351418e+01   1.0000000e+02   9.8367348e+00  -9.8149338e-02   1.1886312e+01
   1.7837088e+01  -2.5479719e+01   1.0000000e+02   9.5176875e+00  -4.2302329e-01   1.0667439e+01
   1.7852895e+01  -2.5607646e+01   1.0000000e+02   8.9392328e+00  -8.5517917e-01   9.3677080e+00
   1.7873026e+01  -2.5735080e+01   1.0000000e+02   8.0686865e+00  -1.3813914e+00   8.0715535e+00
   1.7897477e+01  -2.5861902e+01   1.0000000e+02   6.8974658e+00  -1.9728906e+00   6.8898242e+00
   1.7926240e+01  -2.5987996e+01   1.0000000e+02   5.4597871e+00  -2.5943748e+00   5.9436710e+00
   1.7959301e+01  -2.6113241e+01   1.0000000e+02   3.8396000e+00  -3.2101433e+00   5.3389373e+00
   1.7996643e+01  -2.6237521e+01   1.0000000e+02   2.1598024e+00  -3.7854210e+00   5.1425615e+00
   1.8038245e+01  -2.6360719e+01   1.0000000e+02   5.5979932e-01  -4.2860384e+00   5.3719355e+00
   1.8084083e+01  -2.6482717e+01   1.0000000e+02  -8.2822207e-01  -4.6806317e+00   5.9988049e+00
   1.8134125e+01  -2.6603401e+01   1.0000000e+02  -1.8953378e+00  -4.9476639e+00   6.9620680e+00
   1.8188338e+01  -2.6722654e+01   1.0000000e+02  -2.5606221e+00  -5.0862802e+00   8.1777409e+00
   1.8246685e+01  -2.6840364e+01   1.0000000e+02  -2.7714639e+00  -5.1238847e+00   9.5372347e+00
   1.8309121e+01  -2.6956416e+01   1.0000000e+02  -2.5107114e+00  -5.1133873e+00   1.0899594e+01
   1.8375601e+01  -2.7070700e+01   1.0000000e+02  -1.8125215e+00  -5.1197855e+00   1.2096144e+01
   1.8446073e+01  -2.7183105e+01   1.0000000e+02  -7.7186736e-01  -5.2034129e+00   1.2957436e+01
   1.8520480e+01  -2.7293523e+01   1.0000000e+02   4.6866419e-01  -5.4077800e+00   1.3348164e+01
   1.8598764e+01  -2.7401844e+01   1.0000000e+02   1.7492559e+00  -5.7514534e+00   1.3184992e+01
   1.8680860e+01  -2.7507965e+01   1.0000000e+02   2.9182163e+00  -6.2187916e+00   1.2434101e+01
   1.8766698e+01  -2.7611781e+01   1.0000000e+02   3.8402726e+00  -6.7531007e+00   1.1107044e+01
   1.8856206e+01  -2.7713190e+01   1.0000000e+02   4.3970019e+00  -7.2614799e+00   9.2665050e+00
   1.8949307e+01  -2.7812092e+01   1.0000000e+02   4.4911312e+00  -7.6346461e+00   7.0349614e+00
   1.9045919e+01  -2.7908389e+01   1.0000000e+02   4.0578903e+00  -7.7748322e+00   4.5943088e+00
   1.9145956e+01  -2.8001987e+01   1.0000000e+02   3.0791685e+00  -7.6216182e+00   2.1709437e+00
   1.9249328e+01  -2.8092791e+01   1.0000000e+02   1.5938113e+00  -7.1693397e+00   8.5483544e-03
   1.9355941e+01  -2.8180711e+01   1.0000000e+02  -3.0035191e-01  -6.4754961e+00  -1.6659736e+00
   1.9465698e+01  -2.8265659e+01   1.0000000e+02  -2.4534628e+00  -5.6629201e+00  -2.6806383e+00
   1.9578496e+01  -2.8347550e+01   1.0000000e+02  -4.6812311e+00  -4.9115956e+00  -2.9625671e+00
   1.9694230e+01  -2.8426301e+01   1.0000000e+02  -6.7986221e+00  -4.4272810e+00  -2.5792956e+00
   1.9812791e+01  -2.8501834e+01   1.0000000e+02  -8.6687440e+00  -4.3818639e+00  -1.7475848e+00
   1.9934064e+01  -2.8574071e+01   1.0000000e+02  -1.0247005e+01  -4.8491971e+00  -7.8122128e-01
   2.0057933e+01  -2.8642939e+01   1.0000000e+02  -1.1589309e+01  -5.7768439e+00   8.3350194e-03
   2.0184280e+01  -2.8708368e+01   1.0000000e+02  -1.2812732e+01  -7.0099590e+00   4.0164861e-01
   2.0312979e+01  -2.8770292e+01   1.0000000e+02  -1.4033147e+01  -8.3434458e+00   3.0726354e-01
   2.0443904e+01  -2.8828647e+01   1.0000000e+02  -1.5315165e+01  -9.5725756e+00  -2.5129552e-01
   2.0576927e+01  -2.8883373e+01   1.0000000e+02  -1.6651861e+01  -1.0534303e+01  -1.1702967e+00
   2.0711915e+01  -2.8934415e+01   1.0000000e+02  -1.7973518e+01  -1.1142165e+01  -2.3104344e+00
   2.0848732e+01  -2.8981720e+01   1.0000000e+02  -1.9178077e+01  -1.1403335e+01  -3.5500414e+00
   2.0987242e+01  -2.9025238e+01   1.0000000e+02  -2.0169566e+01  -1.1400307e+01  -4.8304179e+00
   2.1127305e+01  -2.9064927e+01   1.0000000e+02  -2.0883523e+01  -1.1242571e+01  -6.1697704e+00
   2.1268778e+01  -2.9100743e+01   1.0000000e+02  -2.1287137e+01  -1.1014862e+01  -7.6468499e+00
   2.1411518e+01  -2.9132651e+01   1.0000000e+02  -2.1365403e+01  -1.0737925e+01  -9.3751300e+00
   2.1555379e+01  -2.9160617e+01   1.0000000e+02  -2.1114827e+01  -1.0336349e+01  -1.1475667e+01
   2.1700213e+01  -2.9184612e+01   1.0000000e+02  -2.0549227e+01  -9.6129814e+00  -1.4027083e+01
   2.1845873e+01  -2.9204611e+01   1.0000000e+02  -1.9698600e+01  -8.2581113e+00  -1.6981204e+01
   2.1992207e+01  -2.9220594e+01   1.0000000e+02  -1.8585462e+01  -5.9243748e+00  -2.0077628e+01
   2.2139067e+01  -2.9232544e+01   1.0000000e+02  -1.7194296e+01  -2.3609544e+00  -2.2814757e+01
   2.2286299e+01  -2.9240449e+01   1.0000000e+02  -1.5475602e+01   2.4322061e+00  -2.4515636e+01
   2.2433751e+01  -2.9244300e+01   1.0000000e+02  -1.3404234e+01   8.0918702e+00  -2.4505618e+01
   2.2581273e+01  -2.9244093e+01   1.0000000e+02  -1.1052899e+01   1.3908317e+01  -2.2371319e+01
   2.2728710e+01  -2.9239829e+01   1.0000000e+02  -8.6106648e+00   1.9030142e+01  -1.8174845e+01
   2.2875911e+01  -2.9231512e+01   1.0000000e+02  -6.3217457e+00   2.2774564e+01  -1.2459544e+01
   2.3022724e+01  -2.9219151e+01   1.0000000e+02  -4.3944953e+00   2.4843853e+01  -6.0266917e+00
   2.3168997e+01  -2.9202758e+01   1.0000000e+02  -2.9461053e+00   2.5332232e+01   3.5675974e-01
   2.3314579e+01  -2.9182350e+01   1.0000000e+02  -2.0020207e+00   2.4578699e+01   6.1518036e+00
   2.3459321e+01  -2.9157949e+01   1.0000000e+02  -1.5241573e+00   2.2987364e+01   1.1093557e+01
   2.3603074e+01  -2.9129581e+01   1.0000000e+02  -1.4383477e+00   2.0899915e+01   1.5127547e+01
   2.3745692e+01  -2.9097273e+01   1.0000000e+02  -1.6497701e+00   1.8553749e+01   1.8304467e+01
   2.3887028e+01  -2.9061061e+01   1.0000000e+02  -2.0503858e+00   1.6109995e+01   2.0701223e+01
   2.4026939e+01  -2.9020980e+01   1.0000000e+02  -2.5275393e+00   1.3698037e+01   2.2400379e+01
   2.4165283e+01  -2.8977074e+01   1.0000000e+02  -2.9779471e+00   1.1430254e+01   2.3505321e+01
   2.4301920e+01  -2.8929386e+01   1.0000000e+02  -3.3247288e+00   9.3833143e+00   2.4147531e+01
   2.4436714e+01  -2.8877967e+01   1.0000000e+02  -3.5300700e+00   7.5763042e+00   2.4463962e+01
   2.4569529e+01  -2.8822868e+01   1.0000000e+02  -3.5970781e+00   5.9745146e+00   2.4557755e+01
   2.5284045e+01  -2.8598997e+01   1.0000000e+02  -1.5755340e+00  -1.4453104e+00   2.1315103e+01
   2.5402001e+01  -2.8523370e+01   1.0000000e+02  -1.5624082e+00  -1.8129542e+00   2.0379635e+01
   2.5517216e+01  -2.8444644e+01   1.0000000e+02  -1.5728158e+00  -1.9360233e+00   1.9604922e+01
   2.5629585e+01  -2.8362894e+01   1.0000000e+02  -1.6596612e+00  -1.8896326e+00   1.9096745e+01
   2.5739012e+01  -2.8278198e+01   1.0000000e+02  -1.9022089e+00  -1.7847851e+00   1.8881228e+01
   2.5845402e+01  -2.8190634e+01   1.0000000e+02  -2.3674165e+00  -1.7228868e+00   1.8876177e+01
   2.5948661e+01  -2.8100286e+01   1.0000000e+02  -3.0684593e+00  -1.7459484e+00   1.8919183e+01
   2.6048704e+01  -2.8007237e+01   1.0000000e+02  -3.9492306e+00  -1.8197657e+00   1.8837949e+01
   2.6145445e+01  -2.7911575e+01   1.0000000e+02  -4.9011117e+00  -1.8608797e+00   1.8518016e+01
   2.6238805e+01  -2.7813389e+01   1.0000000e+02  -5.7969947e+00  -1.7846567e+00   1.7933047e+01
   2.6328707e+01  -2.7712769e+01   1.0000000e+02  -6.5237568e+00  -1.5408603e+00   1.7136469e+01
   2.6415077e+01  -2.7609809e+01   1.0000000e+02  -7.0071922e+00  -1.1213800e+00   1.6237310e+01
   2.6497849e+01  -2.7504604e+01   1.0000000e+02  -7.2351502e+00  -5.5004853e-01   1.5375836e+01
   2.6576956e+01  -2.7397250e+01   1.0000000e+02  -7.2780841e+00   1.2885530e-01   1.4692792e+01
   2.6652337e+01  -2.7287846e+01   1.0000000e+02  -7.2900013e+00   8.5714004e-01   1.4283215e+01
   2.6723936e+01  -2.7176491e+01   1.0000000e+02  -7.4717326e+00   1.5681317e+00   1.4145741e+01
   2.6791700e+01  -2.7063287e+01   1.0000000e+02  -7.9989380e+00   2.1968932e+00   1.4156676e+01
   2.6855579e+01  -2.6948337e+01   1.0000000e+02  -8.9442059e+00   2.6972789e+00   1.4094705e+01
   2.6915529e+01  -2.6831743e+01   1.0000000e+02  -1.0233535e+01   3.0607667e+00   1.3716952e+01
   2.6971508e+01  -2.6713612e+01   1.0000000e+02  -1.1664510e+01   3.3258598e+00   1.2856622e+01
   2.7023479e+01  -2.6594048e+01   1.0000000e+02  -1.2983620e+01   3.5656654e+00   1.1493247e+01
   2.7071409e+01  -2.6473160e+01   1.0000000e+02  -1.3982804e+01   3.8532004e+00   9.7541357e+00
   2.7115268e+01  -2.6351054e+01   1.0000000e+02  -1.4561302e+01   4.2249658e+00   7.8499574e+00
   2.7155030e+01  -2.6227838e+01   1.0000000e+02  -1.4731940e+01   4.6664091e+00   5.9926788e+00
   2.7190675e+01  -2.6103623e+01   1.0000000e+02  -1.4595437e+01   5.1225819e+00   4.3351236e+00
   2.7222184e+01  -2.5978518e+01   1.0000000e+02  -1.4305706e+01   5.5206358e+00   2.9347186e+00
   2.7249543e+01  -2.5852632e+01   1.0000000e+02  -1.4024265e+01   5.7919121e+00   1.7358961e+00
   2.7272741e+01  -2.5726075e+01   1.0000000e+02  -1.3858711e+01   5.8882741e+00   5.8153489e-01
   2.7291773e+01  -2.5598959e+01   1.0000000e+02  -1.3802630e+01   5.7906013e+00  -7.2860600e-01
   2.7306634e+01  -2.5471393e+01   1.0000000e+02  -1.3718359e+01   5.5076099e+00  -2.3361182e+00
   2.7317326e+01  -2.5343488e+01   1.0000000e+02  -1.3396688e+01   5.0654727e+00  -4.2258232e+00
   2.7323852e+01  -2.5215355e+01   1.0000000e+02  -1.2675431e+01   4.4957539e+00  -6.2020831e+00
   2.7326221e+01  -2.5087105e+01   1.0000000e+02  -1.1542936e+01   3.8344845e+00  -7.9708569e+00
   2.7324443e+01  -2.4958846e+01   1.0000000e+02  -1.0152606e+01   3.1355411e+00  -9.2809932e+00
   2.7318532e+01  -2.4830689e+01   1.0000000e+02  -8.7399954e+00   2.4835117e+00  -1.0030951e+01
   2.7308508e+01  -2.4702744e+01   1.0000000e+02  -7.5071363e+00   1.9878229e+00  -1.0276920e+01
   2.7294390e+01  -2.4575119e+01   1.0000000e+02  -6.5561201e+00   1.7578633e+00  -1.0156972e+01
   2.7276203e+01  -2.4447922e+01   1.0000000e+02  -5.9025652e+00   1.8741291e+00  -9.8058701e+00
   2.7253974e+01  -2.4321261e+01   1.0000000e+02  -5.5299692e+00   2.3668636e+00  -9.3231908e+00
   2.7227735e+01  -2.4195243e+01   1.0000000e+02  -5.4247895e+00   3.2055620e+00  -8.7937945e+00
   2.7197519e+01  -2.4069973e+01   1.0000000e+02  -5.5700176e+00   4.2982737e+00  -8.3151495e+00
   2.7163362e+01  -2.3945558e+01   1.0000000e+02  -5.9184422e+00   5.5001500e+00  -7.9987352e+00
   2.7125304e+01  -2.3822100e+01   1.0000000e+02  -6.3728479e+00   6.6327159e+00  -7.9471426e+00
   2.7083388e+01  -2.3699702e+01   1.0000000e+02  -6.7831929e+00   7.5155748e+00  -8.2213518e+00
   2.7037658e+01  -2.3578467e+01   1.0000000e+02  -6.9644473e+00   8.0073900e+00  -8.8050943e+00
   2.6988164e+01  -2.3458495e+01   1.0000000e+02  -6.7448389e+00   8.0430399e+00  -9.5760899e+00
   2.6934955e+01  -2.3339886e+01   1.0000000e+02  -6.0420540e+00   7.6496563e+00  -1.0312309e+01
   2.6878085e+01  -2.3222737e+01   1.0000000e+02  -4.9276953e+00   6.9333764e+00  -1.0757900e+01
   2.6817610e+01  -2.3107144e+01   1.0000000e+02  -3.6262570e+00   6.0418897e+00  -1.0729116e+01
   2.6753589e+01  -2.2993204e+01   1.0000000e+02  -2.4379922e+00   5.1171421e+00  -1.0197588e+01
   2.6686081e+01  -2.2881009e+01   1.0000000e+02  -1.6329386e+00   4.2541154e+00  -9.3028787e+00
   2.6615151e+01  -2.2770651e+01   1.0000000e+02  -1.3698684e+00   3.4779355e+00  -8.2991131e+00
   2.6540863e+01  -2.2662220e+01   1.0000000e+02  -1.6582684e+00   2.7441062e+00  -7.4687266e+00
   2.6463287e+01  -2.2555805e+01   1.0000000e+02  -2.3618956e+00   1.9618587e+00  -7.0316343e+00
   2.6382491e+01  -2.2451492e+01   1.0000000e+02  -3.2433634e+00   1.0348854e+00  -7.0752450e+00
   2.6298547e+01  -2.2349366e+01   1.0000000e+02  -4.0415453e+00  -9.4699572e-02  -7.5320270e+00
   2.6211531e+01  -2.2249510e+01   1.0000000e+02  -4.5536626e+00  -1.4188387e+00  -8.2173846e+00
   2.6121518e+01  -2.2152005e+01   1.0000000e+02  -4.6854168e+00  -2.8662068e+00  -8.9097416e+00
   2.6028587e+01  -2.2056929e+01   1.0000000e+02  -4.4511147e+00  -4.3324412e+00  -9.4302768e+00
   2.5932816e+01  -2.1964359e+01   1.0000000e+02  -3.9362986e+00  -5.7202305e+00  -9.6859750e+00
   2.5834289e+01  -2.1874369e+01   1.0000000e+02  -3.2502256e+00  -6.9698862e+00  -9.6683842e+00
   2.5733089e+01  -2.1787033e+01   1.0000000e+02  -2.4882023e+00  -8.0707026e+00  -9.4222554e+00
   2.5629301e+01  -2.1702420e+01   1.0000000e+02  -1.7118587e+00  -9.0531110e+00  -9.0040872e+00
   2.5523013e+01  -2.1620598e+01   1.0000000e+02  -9.4639611e-01  -9.9661951e+00  -8.4464888e+00
   2.5414312e+01  -2.1541632e+01   1.0000000e+02  -1.9074931e-01  -1.0846696e+01  -7.7397048e+00
   2.5303289e+01  -2.1465587e+01   1.0000000e+02   5.6472274e-01  -1.1689116e+01  -6.8376558e+00
   2.5190035e+01  -2.1392522e+01   1.0000000e+02   1.3206866e+00  -1.2431274e+01  -5.6861468e+00
   2.5074643e+01  -2.1322496e+01   1.0000000e+02   2.0574173e+00  -1.2964035e+01  -4.2588721e+00
   2.4957208e+01  -2.1255564e+01   1.0000000e+02   2.7316909e+00  -1.3160936e+01  -2.5854876e+00
   2.4837825e+01  -2.1191781e+01   1.0000000e+02   3.2830588e+00  -1.2914923e+01  -7.6408720e-01
   2.4716590e+01  -2.1131197e+01   1.0000000e+02   3.6480878e+00  -1.2171731e+01   1.0435998e+00
   2.4593602e+01  -2.1073860e+01   1.0000000e+02   3.7765544e+00  -1.0955833e+01   2.6345260e+00
   2.4468959e+01  -2.1019816e+01   1.0000000e+02   3.6441839e+00  -9.3857789e+00   3.8056365e+00
   2.4342761e+01  -2.0969108e+01   1.0000000e+02   3.2597408e+00  -7.6660617e+00   4.4112611e+00
   2.4215110e+01  -2.0921775e+01   1.0000000e+02   2.6630227e+00  -6.0411277e+00   4.4153831e+00
   2.4086107e+01  -2.0877856e+01   1.0000000e+02   1.9111890e+00  -4.7226171e+00   3.9043429e+00
   2.3955855e+01  -2.0837385e+01   1.0000000e+02   1.0590504e+00  -3.8284650e+00   3.0460103e+00
   2.3824456e+01  -2.0800394e+01   1.0000000e+02   1.4511291e-01  -3.3673001e+00   2.0184511e+00
   2.3692016e+01  -2.0766913e+01   1.0000000e+02  -8.0868727e-01  -3.2713098e+00   9.4939750e-01
   2.3558639e+01  -2.0736969e+01   1.0000000e+02  -1.7863009e+00  -3.4524154e+00  -1.0361158e-01
   2.3424429e+01  -2.0710584e+01   1.0000000e+02  -2.7668108e+00  -3.8479276e+00  -1.1313810e+00
   2.3289494e+01  -2.0687779e+01   1.0000000e+02  -3.7223521e+00  -4.4359293e+00  -2.1339883e+00
   2.3153938e+01  -2.0668574e+01   1.0000000e+02  -4.6231203e+00  -5.2233524e+00  -3.0916941e+00
   2.3017869e+01  -2.0652982e+01   1.0000000e+02  -5.4409225e+00  -6.2223122e+00  -3.9577069e+00
   2.2881394e+01  -2.0641017e+01   1.0000000e+02  -6.1473743e+00  -7.4307225e+00  -4.6686965e+00
   2.2744620e+01  -2.0632688e+01   1.0000000e+02  -6.7117448e+00  -8.8247887e+00  -5.1605524e+00
   2.2607654e+01  -2.0628000e+01   1.0000000e+02  -7.1058276e+00  -1.0361386e+01  -5.3791088e+00
   2.2470603e+01  -2.0626959e+01   1.0000000e+02  -7.3162886e+00  -1.1984136e+01  -5.2850230e+00
   2.2333575e+01  -2.0629565e+01   1.0000000e+02  -7.3556384e+00  -1.3631715e+01  -4.8573849e+00
   2.2196678e+01  -2.0635815e+01   1.0000000e+02  -7.2618846e+00  -1.5250503e+01  -4.0942197e+00
   2.2060019e+01  -2.0645705e+01   1.0000000e+02  -7.0855480e+00  -1.6805923e+01  -3.0023261e+00
   2.1923705e+01  -2.0659227e+01   1.0000000e+02  -6.8713986e+00  -1.8278868e+01  -1.5782734e+00
   2.1787844e+01  -2.0676371e+01   1.0000000e+02  -6.6442772e+00  -1.9642487e+01   2.0225646e-01
   2.1652541e+01  -2.0697122e+01   1.0000000e+02  -6.4049471e+00  -2.0833929e+01   2.3708127e+00
   2.1517904e+01  -2.0721465e+01   1.0000000e+02  -6.1363945e+00  -2.1743217e+01   4.9314025e+00
   2.1384039e+01  -2.0749379e+01   1.0000000e+02  -5.8154528e+00  -2.2230546e+01   7.8247829e+00
   2.1251050e+01  -2.0780844e+01   1.0000000e+02  -5.4236921e+00  -2.2166148e+01   1.0911238e+01
   2.1119044e+01  -2.0815834e+01   1.0000000e+02  -4.9550596e+00  -2.1478022e+01   1.3982169e+01
   2.0988125e+01  -2.0854321e+01   1.0000000e+02  -4.4211313e+00  -2.0187627e+01   1.6802417e+01
   2.0858395e+01  -2.0896275e+01   1.0000000e+02  -3.8529952e+00  -1.8413354e+01   1.9170315e+01
   2.0729960e+01  -2.0941663e+01   1.0000000e+02  -3.2960197e+00  -1.6336783e+01   2.0968148e+01
   2.0602920e+01  -2.0990449e+01   1.0000000e+02  -2.7961425e+00  -1.4149732e+01   2.2179082e+01
   2.0477377e+01  -2.1042593e+01   1.0000000e+02  -2.3834218e+00  -1.2010156e+01   2.2867526e+01
   2.0353432e+01  -2.1098055e+01   1.0000000e+02  -2.0618125e+00  -1.0021795e+01   2.3141418e+01
   2.0231184e+01  -2.1156791e+01   1.0000000e+02  -1.8101926e+00  -8.2342874e+00   2.3116524e+01
   2.0110731e+01  -2.1218753e+01   1.0000000e+02  -1.5928120e+00  -6.6532022e+00   2.2891041e+01
   1.9992172e+01  -2.1283893e+01   1.0000000e+02  -1.3737132e+00  -5.2551749e+00   2.2531120e+01
   1.9875602e+01  -2.1352159e+01   1.0000000e+02  -1.1288852e+00  -4.0059925e+00   2.2068886e+01
   1.9761115e+01  -2.1423495e+01   1.0000000e+02  -8.5191706e-01  -2.8763519e+00   2.1511844e+01
   1.9648807e+01  -2.1497846e+01   1.0000000e+02  -5.5351681e-01  -1.8508957e+00   2.0857906e+01
   1.9538769e+01  -2.1575152e+01   1.0000000e+02  -2.5731558e-01  -9.3032873e-01   2.0111632e+01
   1.9431092e+01  -2.1655351e+01   1.0000000e+02   8.1348438e-03  -1.2678479e-01   1.9298576e+01
   1.9325865e+01  -2.1738378e+01   1.0000000e+02   2.2213333e-01   5.4671671e-01   1.8471451e+01
   1.9223177e+01  -2.1824168e+01   1.0000000e+02   3.8520819e-01   1.0881928e+00   1.7701486e+01
   1.9123113e+01  -2.1912651e+01   1.0000000e+02   5.2426920e-01   1.5130388e+00   1.7055788e+01
   1.9025759e+01  -2.2003757e+01   1.0000000e+02   6.8273539e-01   1.8496304e+00   1.6572821e+01
   1.8931196e+01  -2.2097411e+01   1.0000000e+02   9.0057794e-01   2.1261555e+00   1.6252900e+01
   1.8839507e+01  -2.2193539e+01   1.0000000e+02   1.1983872e+00   2.3583828e+00   1.6069278e+01
   1.8750770e+01  -2.2292062e+01   1.0000000e+02   1.5758653e+00   2.5460681e+00   1.5988710e+01
   1.8665063e+01  -2.2392902e+01   1.0000000e+02   2.0224085e+00   2.6792253e+00   1.5986823e+01
   1.8582461e+01  -2.2495976e+01   1.0000000e+02   2.5300496e+00   2.7498496e+00   1.6050073e+01
   1.8503037e+01  -2.2601201e+01   1.0000000e+02   3.0984966e+00   2.7618976e+00   1.6166114e+01
   1.8426863e+01  -2.2708492e+01   1.0000000e+02   3.7297714e+00   2.7331275e+00   1.6312954e+01
   1.8354007e+01  -2.2817760e+01   1.0000000e+02   4.4194217e+00   2.6898023e+00   1.6456367e+01
   1.8284537e+01  -2.2928917e+01   1.0000000e+02   5.1516038e+00   2.6602579e+00   1.6554527e+01
   1.8218518e+01  -2.3041873e+01   1.0000000e+02   5.8974873e+00   2.6696913e+00   1.6563592e+01
   1.8156010e+01  -2.3156533e+01   1.0000000e+02   6.6138903e+00   2.7340218e+00   1.6444221e+01
   1.8097074e+01  -2.3272805e+01   1.0000000e+02   7.2452550e+00   2.8527484e+00   1.6172862e+01
   1.8041768e+01  -2.3390593e+01   1.0000000e+02   7.7339938e+00   3.0055042e+00   1.5754868e+01
   1.7990146e+01  -2.3509799e+01   1.0000000e+02   8.0369703e+00   3.1565548e+00   1.5230553e+01
   1.7942261e+01  -2.3630324e+01   1.0000000e+02   8.1393412e+00   3.2660814e+00   1.4669272e+01
   1.7898162e+01  -2.3752070e+01   1.0000000e+02   8.0593738e+00   3.3027518e+00   1.4154647e+01
   1.7857895e+01  -2.3874935e+01   1.0000000e+02   7.8453584e+00   3.2518709e+00   1.3767906e+01
   1.7821506e+01  -2.3998817e+01   1.0000000e+02   7.5704191e+00   3.1179989e+00   1.3572429e+01
   1.7789035e+01  -2.4123612e+01   1.0000000e+02   7.3261970e+00   2.9248055e+00   1.3596819e+01
   1.7760520e+01  -2.4249215e+01   1.0000000e+02   7.2087007e+00   2.7122813e+00   1.3817329e+01
   1.7735997e+01  -2.4375522e+01   1.0000000e+02   7.2925120e+00   2.5279045e+00   1.4150047e+01
   1.7715499e+01  -2.4502426e+01   1.0000000e+02   7.6016470e+00   2.4114475e+00   1.4464840e+01
   1.7699054e+01  -2.4629820e+01   1.0000000e+02   8.0934996e+00   2.3799689e+00   1.4622114e+01
   1.7686689e+01  -2.4757596e+01   1.0000000e+02   8.6692839e+00   2.4213283e+00   1.4517816e+01
   1.7678427e+01  -2.4885645e+01   1.0000000e+02   9.2099477e+00   2.4988818e+00   1.4112444e+01
   1.7674288e+01  -2.5013859e+01   1.0000000e+02   9.6172788e+00   2.5625231e+00   1.3427310e+01
   1.7674287e+01  -2.5142128e+01   1.0000000e+02   9.8338910e+00   2.5598165e+00   1.2515733e+01
   1.7678438e+01  -2.5270341e+01   1.0000000e+02   9.8347146e+00   2.4450621e+00   1.1435617e+01
   1.7686750e+01  -2.5398390e+01   1.0000000e+02   9.6064838e+00   2.1877356e+00   1.0240965e+01
   1.7699230e+01  -2.5526163e+01   1.0000000e+02   9.1344101e+00   1.7794884e+00   8.9883948e+00
   1.7715881e+01  -2.5653549e+01   1.0000000e+02   8.4013832e+00   1.2363056e+00   7.7460262e+00
   1.7736700e+01  -2.5780439e+01   1.0000000e+02   7.3965290e+00   5.9319137e-01   6.5990065e+00
   1.7761684e+01  -2.5906722e+01   1.0000000e+02   6.1310701e+00  -1.0670046e-01   5.6489571e+00
   1.7790825e+01  -2.6032286e+01   1.0000000e+02   4.6561094e+00  -8.2205656e-01   5.0010220e+00
   1.7824110e+01  -2.6157023e+01   1.0000000e+02   3.0692925e+00  -1.5170161e+00   4.7387934e+00
   1.7861523e+01  -2.6280823e+01   1.0000000e+02   1.5025342e+00  -2.1586263e+00   4.9005178e+00
   1.7903046e+01  -2.6403575e+01   1.0000000e+02   9.7274593e-02  -2.7133321e+00   5.4694200e+00
   1.7948655e+01  -2.6525172e+01   1.0000000e+02  -1.0209769e+00  -3.1466707e+00   6.3803392e+00
   1.7998322e+01  -2.6645506e+01   1.0000000e+02  -1.7597711e+00  -3.4288102e+00   7.5373748e+00
   1.8052016e+01  -2.6764468e+01   1.0000000e+02  -2.0644619e+00  -3.5465432e+00   8.8311933e+00
   1.8109704e+01  -2.6881953e+01   1.0000000e+02  -1.9158670e+00  -3.5162882e+00   1.0144585e+01
   1.8171344e+01  -2.6997854e+01   1.0000000e+02  -1.3322040e+00  -3.3880217e+00   1.1348579e+01
   1.8236896e+01  -2.7112068e+01   1.0000000e+02  -3.7805590e-01  -3.2348985e+00   1.2305789e+01
   1.8306311e+01  -2.7224492e+01   1.0000000e+02   8.3241525e-01  -3.1340946e+00   1.2891418e+01
   1.8379539e+01  -2.7335022e+01   1.0000000e+02   2.1521539e+00  -3.1508433e+00   1.3019891e+01
   1.8456526e+01  -2.7443559e+01   1.0000000e+02   3.4328815e+00  -3.3288873e+00   1.2653065e+01
   1.8537213e+01  -2.7550003e+01   1.0000000e+02   4.5483377e+00  -3.6810460e+00   1.1786045e+01
   1.8621536e+01  -2.7654256e+01   1.0000000e+02   5.3960369e+00  -4.1776949e+00   1.0432984e+01
   1.8709430e+01  -2.7756224e+01   1.0000000e+02   5.8870128e+00  -4.7428594e+00   8.6318601e+00
   1.8800824e+01  -2.7855811e+01   1.0000000e+02   5.9409183e+00  -5.2670788e+00   6.4635309e+00
   1.8895644e+01  -2.7952925e+01   1.0000000e+02   5.4943257e+00  -5.6346570e+00   4.0664612e+00
   1.8993812e+01  -2.8047477e+01   1.0000000e+02   4.5179704e+00  -5.7538695e+00   1.6339740e+00
   1.9095245e+01  -2.8139378e+01   1.0000000e+02   3.0331996e+00  -5.5795935e+00  -6.0738141e-01
   1.9199858e+01  -2.8228542e+01   1.0000000e+02   1.1191147e+00  -5.1244980e+00  -2.4306564e+00
   1.9307562e+01  -2.8314886e+01   1.0000000e+02  -1.0918277e+00  -4.4619596e+00  -3.6435074e+00
   1.9418263e+01  -2.8398328e+01   1.0000000e+02  -3.4282477e+00  -3.7243398e+00  -4.1240982e+00
   1.9531865e+01  -2.8478790e+01   1.0000000e+02  -5.7053165e+00  -3.0905228e+00  -3.8595298e+00
   1.9648269e+01  -2.8556195e+01   1.0000000e+02  -7.7635422e+00  -2.7493389e+00  -2.9741707e+00
   1.9767369e+01  -2.8630471e+01   1.0000000e+02  -9.5136381e+00  -2.8393937e+00  -1.7176123e+00
   1.9889061e+01  -2.8701547e+01   1.0000000e+02  -1.0962903e+01  -3.3966144e+00  -3.9509073e-01
   2.0013234e+01  -2.8769354e+01   1.0000000e+02  -1.2199887e+01  -4.3466093e+00   7.2743276e-01
   2.0139775e+01  -2.8833829e+01   1.0000000e+02  -1.3343972e+01  -5.5431091e+00   1.4855159e+00
   2.0268567e+01  -2.8894909e+01   1.0000000e+02  -1.4491899e+01  -6.8182854e+00   1.8209488e+00
   2.0399494e+01  -2.8952536e+01   1.0000000e+02  -1.5687740e+01  -8.0180807e+00   1.7529167e+00
   2.0532431e+01  -2.9006654e+01   1.0000000e+02  -1.6919788e+01  -9.0238052e+00   1.3465275e+00
   2.0667257e+01  -2.9057212e+01   1.0000000e+02  -1.8136605e+01  -9.7702309e+00   6.8592016e-01
   2.0803844e+01  -2.9104160e+01   1.0000000e+02  -1.9272774e+01  -1.0255878e+01  -1.5307407e-01
   2.0942063e+01  -2.9147453e+01   1.0000000e+02  -2.0272690e+01  -1.0534821e+01  -1.1271505e+00
   2.1081784e+01  -2.9187049e+01   1.0000000e+02  -2.1098409e+01  -1.0689896e+01  -2.2388143e+00
   2.1222873e+01  -2.9222910e+01   1.0000000e+02  -2.1720236e+01  -1.0796657e+01  -3.5400899e+00
   2.1365196e+01  -2.9255000e+01   1.0000000e+02  -2.2106380e+01  -1.0883011e+01  -5.1299608e+00
   2.1508616e+01  -2.9283290e+01   1.0000000e+02  -2.2227565e+01  -1.0886152e+01  -7.1339935e+00
   2.1652996e+01  -2.9307750e+01   1.0000000e+02  -2.2071387e+01  -1.0621123e+01  -9.6484587e+00
   2.1798196e+01  -2.9328358e+01   1.0000000e+02  -2.1644546e+01  -9.7925387e+00  -1.2652273e+01
   2.1944077e+01  -2.9345093e+01   1.0000000e+02  -2.0949270e+01  -8.0697477e+00  -1.5932461e+01
   2.2090497e+01  -2.9357939e+01   1.0000000e+02  -1.9948868e+01  -5.2018473e+00  -1.9071734e+01
   2.2237314e+01  -2.9366883e+01   1.0000000e+02  -1.8559047e+01  -1.1264697e+00  -2.1505038e+01
   2.2384387e+01  -2.9371917e+01   1.0000000e+02  -1.6692885e+01   3.9506109e+00  -2.2625890e+01
   2.2531571e+01  -2.9373035e+01   1.0000000e+02  -1.4343138e+01   9.5264404e+00  -2.1945323e+01
   2.2678725e+01  -2.9370237e+01   1.0000000e+02  -1.1640851e+01   1.4881757e+01  -1.9282487e+01
   2.2825705e+01  -2.9363525e+01   1.0000000e+02  -8.8362518e+00   1.9294892e+01  -1.4878521e+01
   2.2972370e+01  -2.9352906e+01   1.0000000e+02  -6.2119797e+00   2.2285511e+01  -9.3247160e+00
   2.3118576e+01  -2.9338390e+01   1.0000000e+02  -3.9934063e+00   2.3733671e+01  -3.3392113e+00
   2.3264182e+01  -2.9319991e+01   1.0000000e+02  -2.3062829e+00   2.3826107e+01   2.4633215e+00
   2.3409047e+01  -2.9297728e+01   1.0000000e+02  -1.1810185e+00   2.2901556e+01   7.6954108e+00
   2.3553033e+01  -2.9271622e+01   1.0000000e+02  -5.7629719e-01   2.1296777e+01   1.2193913e+01
   2.3695999e+01  -2.9241698e+01   1.0000000e+02  -4.0276744e-01   1.9262591e+01   1.5935135e+01
   2.3837809e+01  -2.9207986e+01   1.0000000e+02  -5.4180802e-01   1.6965457e+01   1.8942486e+01
   2.3978328e+01  -2.9170519e+01   1.0000000e+02  -8.6228728e-01   1.4535115e+01   2.1243430e+01
   2.4117420e+01  -2.9129332e+01   1.0000000e+02  -1.2382334e+00   1.2098970e+01   2.2879534e+01
   2.4254955e+01  -2.9084465e+01   1.0000000e+02  -1.5669726e+00   9.7759913e+00   2.3928891e+01
   2.4390802e+01  -2.9035963e+01   1.0000000e+02  -1.7843671e+00   7.6488346e+00   2.4503901e+01
   2.4524833e+01  -2.8983872e+01   1.0000000e+02  -1.8725476e+00   5.7466297e+00   2.4721546e+01
   2.4656923e+01  -2.8928242e+01   1.0000000e+02  -1.8554548e+00   4.0554690e+00   2.4667953e+01
   2.4786949e+01  -2.8869127e+01   1.0000000e+02  -1.7811705e+00   2.5498400e+00   2.4383139e+01
   2.4914790e+01  -2.8806583e+01   1.0000000e+02  -1.6977174e+00   1.2223717e+00   2.3876792e+01
   2.5040329e+01  -2.8740671e+01   1.0000000e+02  -1.6343791e+00   9.2284298e-02   2.3161731e+01
   2.5163451e+01  -2.8671454e+01   1.0000000e+02  -1.5968704e+00  -8.0685011e-01   2.2280745e+01
   2.5837641e+01  -2.8373015e+01   1.0000000e+02  -1.0271750e+00  -2.1062965e+00   1.7757905e+01
   2.5944205e+01  -2.8285289e+01   1.0000000e+02  -1.4611587e+00  -2.0044777e+00   1.7936014e+01
   2.6047713e+01  -2.8194849e+01   1.0000000e+02  -2.0726686e+00  -2.0618158e+00   1.8182040e+01
   2.6148081e+01  -2.8101775e+01   1.0000000e+02  -2.8218971e+00  -2.2274835e+00   1.8325700e+01
   2.6245230e+01  -2.8006149e+01   1.0000000e+02  -3.6313184e+00  -2.3976800e+00   1.8255852e+01
   2.6339083e+01  -2.7908057e+01   1.0000000e+02  -4.4123352e+00  -2.4694682e+00   1.7937962e+01
   2.6429569e+01  -2.7807585e+01   1.0000000e+02  -5.0828903e+00  -2.3758807e+00   1.7398465e+01
   2.6516617e+01  -2.7704820e+01   1.0000000e+02  -5.5773036e+00  -2.0896105e+00   1.6706786e+01
   2.6600162e+01  -2.7599852e+01   1.0000000e+02  -5.8615798e+00  -1.6114230e+00   1.5969496e+01
   2.6680143e+01  -2.7492774e+01   1.0000000e+02  -5.9595353e+00  -9.6334569e-01   1.5321937e+01
   2.6756501e+01  -2.7383677e+01   1.0000000e+02  -5.9748672e+00  -1.9106787e-01   1.4895097e+01
   2.6829181e+01  -2.7272657e+01   1.0000000e+02  -6.0833793e+00   6.3413455e-01   1.4756799e+01
   2.6898132e+01  -2.7159809e+01   1.0000000e+02  -6.4813165e+00   1.4257311e+00   1.4855552e+01
   2.6963308e+01  -2.7045230e+01   1.0000000e+02  -7.3035299e+00   2.1063063e+00   1.5007694e+01
   2.7024665e+01  -2.6929018e+01   1.0000000e+02  -8.5503133e+00   2.6364478e+00   1.4950398e+01
   2.7082162e+01  -2.6811273e+01   1.0000000e+02  -1.0065710e+01   3.0329562e+00   1.4446992e+01
   2.7135765e+01  -2.6692094e+01   1.0000000e+02  -1.1590735e+01   3.3619807e+00   1.3394817e+01
   2.7185439e+01  -2.6571583e+01   1.0000000e+02  -1.2870649e+01   3.7036782e+00   1.1869107e+01
   2.7231156e+01  -2.6449842e+01   1.0000000e+02  -1.3750108e+01   4.1081330e+00   1.0072821e+01
   2.7272890e+01  -2.6326972e+01   1.0000000e+02  -1.4201144e+01   4.5730572e+00   8.2373074e+00
   2.7310620e+01  -2.6203078e+01   1.0000000e+02  -1.4295346e+01   5.0538148e+00   6.5443233e+00
   2.7344327e+01  -2.6078262e+01   1.0000000e+02  -1.4165348e+01   5.4902361e+00   5.0893873e+00
   2.7373997e+01  -2.5952629e+01   1.0000000e+02  -1.3970478e+01   5.8306821e+00   3.8660374e+00
   2.7399618e+01  -2.5826283e+01   1.0000000e+02  -1.3852270e+01   6.0459085e+00   2.7620108e+00
   2.7421182e+01  -2.5699329e+01   1.0000000e+02  -1.3875358e+01   6.1337813e+00   1.5849477e+00
   2.7438684e+01  -2.5571871e+01   1.0000000e+02  -1.3979821e+01   6.1153214e+00   1.3490338e-01
   2.7452124e+01  -2.5444014e+01   1.0000000e+02  -1.3988448e+01   6.0205113e+00  -1.6921742e+00
   2.7461504e+01  -2.5315862e+01   1.0000000e+02  -1.3687479e+01   5.8683079e+00  -3.8287925e+00
   2.7466828e+01  -2.5187521e+01   1.0000000e+02  -1.2940532e+01   5.6557495e+00  -6.0467147e+00
   2.7468106e+01  -2.5059095e+01   1.0000000e+02  -1.1760758e+01   5.3705273e+00  -8.0545392e+00
   2.7465348e+01  -2.4930688e+01   1.0000000e+02  -1.0296533e+01   5.0224548e+00  -9.6183673e+00
   2.7458571e+01  -2.4802405e+01   1.0000000e+02  -8.7506679e+00   4.6686585e+00  -1.0632834e+01
   2.7447792e+01  -2.4674347e+01   1.0000000e+02  -7.2937806e+00   4.4088621e+00  -1.1113065e+01
   2.7433031e+01  -2.4546619e+01   1.0000000e+02  -6.0266265e+00   4.3528455e+00  -1.1133396e+01
   2.7414313e+01  -2.4419322e+01   1.0000000e+02  -5.0016073e+00   4.5821090e+00  -1.0771588e+01
   2.7391663e+01  -2.4292559e+01   1.0000000e+02  -4.2648932e+00   5.1246792e+00  -1.0100074e+01
   2.7365113e+01  -2.4166431e+01   1.0000000e+02  -3.8715590e+00   5.9465410e+00  -9.2133473e+00
   2.7334694e+01  -2.4041037e+01   1.0000000e+02  -3.8642890e+00   6.9529248e+00  -8.2505479e+00
   2.7300442e+01  -2.3916477e+01   1.0000000e+02  -4.2374326e+00   7.9968734e+00  -7.3905087e+00
   2.7262393e+01  -2.3792850e+01   1.0000000e+02  -4.9061760e+00   8.8991835e+00  -6.8220565e+00
   2.7220590e+01  -2.3670253e+01   1.0000000e+02  -5.6903115e+00   9.4851263e+00  -6.6948654e+00
   2.7175073e+01  -2.3548782e+01   1.0000000e+02  -6.3304670e+00   9.6320413e+00  -7.0544621e+00
   2.7125890e+01  -2.3428533e+01   1.0000000e+02  -6.5595378e+00   9.3087513e+00  -7.7867036e+00
   2.7073088e+01  -2.3309600e+01   1.0000000e+02  -6.2181301e+00   8.5835067e+00  -8.6240170e+00
   2.7016717e+01  -2.3192075e+01   1.0000000e+02  -5.3463154e+00   7.5949089e+00  -9.2400338e+00
   2.6956831e+01  -2.3076050e+01   1.0000000e+02  -4.1814284e+00   6.5033270e+00  -9.3884434e+00
   2.6893483e+01  -2.2961615e+01   1.0000000e+02  -3.0612813e+00   5.4474030e+00  -9.0027012e+00
   2.6826733e+01  -2.2848859e+01   1.0000000e+02  -2.2991539e+00   4.5170353e+00  -8.2105752e+00
   2.6756638e+01  -2.2737870e+01   1.0000000e+02  -2.0918144e+00   3.7389309e+00  -7.2798076e+00
   2.6683260e+01  -2.2628732e+01   1.0000000e+02  -2.4753930e+00   3.0706155e+00  -6.5297273e+00
   2.6606664e+01  -2.2521530e+01   1.0000000e+02  -3.3222470e+00   2.4094256e+00  -6.2305529e+00
   2.6526914e+01  -2.2416347e+01   1.0000000e+02  -4.3809030e+00   1.6255757e+00  -6.5123053e+00
   2.6444079e+01  -2.2313262e+01   1.0000000e+02  -5.3574308e+00   6.1322547e-01  -7.3193105e+00
   2.6358228e+01  -2.2212356e+01   1.0000000e+02  -6.0112262e+00  -6.6413980e-01  -8.4374318e+00
   2.6269433e+01  -2.2113705e+01   1.0000000e+02  -6.2221265e+00  -2.1585018e+00  -9.5834080e+00
   2.6177765e+01  -2.2017385e+01   1.0000000e+02  -6.0002889e+00  -3.7592001e+00  -1.0508643e+01
   2.6083302e+01  -2.1923469e+01   1.0000000e+02  -5.4472137e+00  -5.3370053e+00  -1.1067529e+01
   2.5986118e+01  -2.1832028e+01   1.0000000e+02  -4.6984638e+00  -6.7872209e+00  -1.1231305e+01
   2.5886293e+01  -2.1743133e+01   1.0000000e+02  -3.8755432e+00  -8.0557769e+00  -1.1059367e+01
   2.5783907e+01  -2.1656850e+01   1.0000000e+02  -3.0588178e+00  -9.1446126e+00  -1.0650746e+01
   2.5679040e+01  -2.1573246e+01   1.0000000e+02  -2.2811718e+00  -1.0099414e+01  -1.0095480e+01
   2.5571775e+01  -2.1492382e+01   1.0000000e+02  -1.5359855e+00  -1.0984356e+01  -9.4379484e+00
   2.5462197e+01  -2.1414322e+01   1.0000000e+02  -7.9442650e-01  -1.1847414e+01  -8.6603654e+00
   2.5350392e+01  -2.1339122e+01   1.0000000e+02  -2.8017200e-02  -1.2686704e+01  -7.6942515e+00
   2.5236446e+01  -2.1266841e+01   1.0000000e+02   7.7003026e-01  -1.3434121e+01  -6.4572270e+00
   2.5120447e+01  -2.1197533e+01   1.0000000e+02   1.5714673e+00  -1.3966775e+01  -4.8999212e+00
   2.5002485e+01  -2.1131250e+01   1.0000000e+02   2.3135292e+00  -1.4141903e+01  -3.0439358e+00
   2.4882651e+01  -2.1068041e+01   1.0000000e+02   2.9150231e+00  -1.3840057e+01  -9.9654759e-01
   2.4761035e+01  -2.1007955e+01   1.0000000e+02   3.2996331e+00  -1.3000140e+01   1.0605146e+00
   2.4637732e+01  -2.0951037e+01   1.0000000e+02   3.4143097e+00  -1.1642464e+01   2.8991488e+00
   2.4512833e+01  -2.0897328e+01   1.0000000e+02   3.2398621e+00  -9.8840310e+00   4.2869405e+00
   2.4386435e+01  -2.0846871e+01   1.0000000e+02   2.7957459e+00  -7.9359942e+00   5.0472283e+00
   2.4258631e+01  -2.0799701e+01   1.0000000e+02   2.1352958e+00  -6.0608237e+00   5.1211069e+00
   2.4129519e+01  -2.0755855e+01   1.0000000e+02   1.3281828e+00  -4.4946980e+00   4.5893452e+00
   2.3999195e+01  -2.0715366e+01   1.0000000e+02   4.3779202e-01  -3.3771586e+00   3.6320051e+00
   2.3867758e+01  -2.0678263e+01   1.0000000e+02  -4.9249946e-01  -2.7296128e+00   2.4495865e+00
   2.3735304e+01  -2.0644575e+01   1.0000000e+02  -1.4377226e+00  -2.4881476e+00   1.1938259e+00
   2.3601934e+01  -2.0614326e+01   1.0000000e+02  -2.3802626e+00  -2.5627161e+00  -5.7027885e-02
   2.3467746e+01  -2.0587540e+01   1.0000000e+02  -3.3010688e+00  -2.8851774e+00  -1.2786466e+00
   2.3332841e+01  -2.0564237e+01   1.0000000e+02  -4.1791834e+00  -3.4263191e+00  -2.4638539e+00
   2.3197319e+01  -2.0544433e+01   1.0000000e+02  -4.9953147e+00  -4.1877474e+00  -3.5950865e+00
   2.3061279e+01  -2.0528143e+01   1.0000000e+02  -5.7314856e+00  -5.1838844e+00  -4.6330781e+00
   2.2924824e+01  -2.0515380e+01   1.0000000e+02  -6.3651555e+00  -6.4237981e+00  -5.5167792e+00
   2.2788054e+01  -2.0506154e+01   1.0000000e+02  -6.8647827e+00  -7.8965618e+00  -6.1695340e+00
   2.2651071e+01  -2.0500470e+01   1.0000000e+02  -7.1955307e+00  -9.5614802e+00  -6.5104378e+00
   2.2513977e+01  -2.0498334e+01   1.0000000e+02  -7.3359962e+00  -1.1346770e+01  -6.4718387e+00
   2.2376871e+01  -2.0499747e+01   1.0000000e+02  -7.2948763e+00  -1.3161839e+01  -6.0191961e+00
   2.2239857e+01  -2.0504707e+01   1.0000000e+02  -7.1137421e+00  -1.4922649e+01  -5.1607373e+00
   2.2103036e+01  -2.0513212e+01   1.0000000e+02  -6.8531225e+00  -1.6577144e+01  -3.9346591e+00
   2.1966508e+01  -2.0525255e+01   1.0000000e+02  -6.5713902e+00  -1.8110462e+01  -2.3774210e+00
   2.1830376e+01  -2.0540826e+01   1.0000000e+02  -6.3076334e+00  -1.9521360e+01  -4.9534089e-01
   2.1694740e+01  -2.0559915e+01   1.0000000e+02  -6.0736958e+00  -2.0783363e+01   1.7364907e+00
   2.1559701e+01  -2.0582506e+01   1.0000000e+02  -5.8559180e+00  -2.1817131e+01   4.3427256e+00
   2.1425359e+01  -2.0608584e+01   1.0000000e+02  -5.6247235e+00  -2.2494088e+01   7.3023974e+00
   2.1291814e+01  -2.0638128e+01   1.0000000e+02  -5.3476397e+00  -2.2671400e+01   1.0516402e+01
   2.1159165e+01  -2.0671117e+01   1.0000000e+02  -5.0005403e+00  -2.2242536e+01   1.3805098e+01
   2.1027513e+01  -2.0707526e+01   1.0000000e+02  -4.5748614e+00  -2.1181965e+01   1.6938856e+01
   2.0896954e+01  -2.0747327e+01   1.0000000e+02  -4.0814397e+00  -1.9563531e+01   1.9691608e+01
   2.0767587e+01  -2.0790492e+01   1.0000000e+02  -3.5505202e+00  -1.7543232e+01   2.1894962e+01
   2.0639509e+01  -2.0836986e+01   1.0000000e+02  -3.0253119e+00  -1.5316071e+01   2.3471035e+01
   2.0512816e+01  -2.0886777e+01   1.0000000e+02  -2.5486421e+00  -1.3068877e+01   2.4433949e+01
   2.0387604e+01  -2.0939826e+01   1.0000000e+02  -2.1479955e+00  -1.0947020e+01   2.4867371e+01
   2.0263968e+01  -2.0996093e+01   1.0000000e+02  -1.8263732e+00  -9.0398774e+00   2.4891970e+01
   2.0142001e+01  -2.1055537e+01   1.0000000e+02  -1.5629873e+00  -7.3806496e+00   2.4633735e+01
   2.0021796e+01  -2.1118113e+01   1.0000000e+02  -1.3225136e+00  -5.9563688e+00   2.4197540e+01
   1.9903445e+01  -2.1183773e+01   1.0000000e+02  -1.0686580e+00  -4.7268747e+00   2.3650572e+01
   1.9787039e+01  -2.1252469e+01   1.0000000e+02  -7.7622637e-01  -3.6474621e+00   2.3021345e+01
   1.9672667e+01  -2.1324148e+01   1.0000000e+02  -4.3707435e-01  -2.6856640e+00   2.2312306e+01
   1.9560418e+01  -2.1398757e+01   1.0000000e+02  -6.0229901e-02  -1.8278944e+00   2.1516777e+01
   1.9450379e+01  -2.1476239e+01   1.0000000e+02   3.3084346e-01  -1.0779626e+00   2.0634974e+01
   1.9342636e+01  -2.1556536e+01   1.0000000e+02   7.0378084e-01  -4.4966949e-01   1.9687465e+01
   1.9237273e+01  -2.1639587e+01   1.0000000e+02   1.0277145e+00   4.4832630e-02   1.8722440e+01
   1.9134374e+01  -2.1725329e+01   1.0000000e+02   1.2871789e+00   4.0736388e-01   1.7810538e+01
   1.9034020e+01  -2.1813697e+01   1.0000000e+02   1.4919526e+00   6.6077855e-01   1.7024678e+01
   1.8936292e+01  -2.1904624e+01   1.0000000e+02   1.6734930e+00   8.4475915e-01   1.6413363e+01
   1.8841268e+01  -2.1998041e+01   1.0000000e+02   1.8678433e+00   1.0009213e+00   1.5985220e+01
   1.8749024e+01  -2.2093877e+01   1.0000000e+02   2.0975036e+00   1.1565123e+00   1.5715552e+01
   1.8659637e+01  -2.2192059e+01   1.0000000e+02   2.3658370e+00   1.3165365e+00   1.5568142e+01
   1.8573180e+01  -2.2292512e+01   1.0000000e+02   2.6666042e+00   1.4682171e+00   1.5516212e+01
   1.8489724e+01  -2.2395159e+01   1.0000000e+02   2.9994238e+00   1.5953127e+00   1.5548885e+01
   1.8409340e+01  -2.2499921e+01   1.0000000e+02   3.3775860e+00   1.6927884e+00   1.5660215e+01
   1.8332096e+01  -2.2606718e+01   1.0000000e+02   3.8217264e+00   1.7714459e+00   1.5832727e+01
   1.8258057e+01  -2.2715467e+01   1.0000000e+02   4.3466641e+00   1.8521634e+00   1.6030881e+01
   1.8187288e+01  -2.2826087e+01   1.0000000e+02   4.9529440e+00   1.9584084e+00   1.6206023e+01
   1.8119850e+01  -2.2938489e+01   1.0000000e+02   5.6243095e+00   2.1116352e+00   1.6302999e+01
   1.8055804e+01  -2.3052589e+01   1.0000000e+02   6.3248488e+00   2.3259905e+00   1.6265630e+01
   1.7995208e+01  -2.3168297e+01   1.0000000e+02   6.9964940e+00   2.5996462e+00   1.6048416e+01
   1.7938116e+01  -2.3285523e+01   1.0000000e+02   7.5660825e+00   2.9088138e+00   1.5635866e+01
   1.7884582e+01  -2.3404177e+01   1.0000000e+02   7.9648434e+00   3.2115618e+00   1.5057595e+01
   1.7834657e+01  -2.3524166e+01   1.0000000e+02   8.1510249e+00   3.4614165e+00   1.4386992e+01
   1.7788390e+01  -2.3645395e+01   1.0000000e+02   8.1229888e+00   3.6237643e+00   1.3722956e+01
   1.7745825e+01  -2.3767771e+01   1.0000000e+02   7.9176523e+00   3.6864074e+00   1.3165534e+01
   1.7707008e+01  -2.3891196e+01   1.0000000e+02   7.6014783e+00   3.6605609e+00   1.2797414e+01
   1.7671979e+01  -2.4015573e+01   1.0000000e+02   7.2641796e+00   3.5762863e+00   1.2670403e+01
   1.7640775e+01  -2.4140805e+01   1.0000000e+02   7.0118907e+00   3.4771682e+00   1.2788528e+01
   1.7613434e+01  -2.4266792e+01   1.0000000e+02   6.9470132e+00   3.4130044e+00   1.3091218e+01
   1.7589987e+01  -2.4393434e+01   1.0000000e+02   7.1340364e+00   3.4272581e+00   1.3454102e+01
   1.7570465e+01  -2.4520629e+01   1.0000000e+02   7.5689024e+00   3.5418415e+00   1.3718572e+01
   1.7554895e+01  -2.4648278e+01   1.0000000e+02   8.1723069e+00   3.7471871e+00   1.3741114e+01
   1.7543302e+01  -2.4776277e+01   1.0000000e+02   8.8146942e+00   4.0032976e+00   1.3438946e+01
   1.7535707e+01  -2.4904523e+01   1.0000000e+02   9.3618777e+00   4.2505031e+00   1.2808143e+01
   1.7532129e+01  -2.5032913e+01   1.0000000e+02   9.7155727e+00   4.4234409e+00   1.1906702e+01
   1.7532583e+01  -2.5161344e+01   1.0000000e+02   9.8273364e+00   4.4633437e+00   1.0819051e+01
   1.7537082e+01  -2.5289710e+01   1.0000000e+02   9.6865221e+00   4.3281804e+00   9.6276426e+00
   1.7545634e+01  -2.5417909e+01   1.0000000e+02   9.2996284e+00   4.0010650e+00   8.4027967e+00
   1.7558246e+01  -2.5545834e+01   1.0000000e+02   8.6751115e+00   3.4940775e+00   7.2056826e+00
   1.7574920e+01  -2.5673382e+01   1.0000000e+02   7.8170519e+00   2.8444895e+00   6.0962542e+00
   1.7595657e+01  -2.5800448e+01   1.0000000e+02   6.7285699e+00   2.1040723e+00   5.1435765e+00
   1.7620451e+01  -2.5926927e+01   1.0000000e+02   5.4271212e+00   1.3262749e+00   4.4323616e+00
   1.7649296e+01  -2.6052713e+01   1.0000000e+02   3.9665563e+00   5.5668745e-01   4.0542841e+00
   1.7682181e+01  -2.6177704e+01   1.0000000e+02   2.4482902e+00  -1.6913215e-01   4.0807915e+00
   1.7719093e+01  -2.6301795e+01   1.0000000e+02   1.0095920e+00  -8.2161758e-01   4.5340249e+00
   1.7760012e+01  -2.6424881e+01   1.0000000e+02  -2.0405819e-01  -1.3720947e+00   5.3737696e+00
   1.7804919e+01  -2.6546861e+01   1.0000000e+02  -1.0679486e+00  -1.7905539e+00   6.5039895e+00
   1.7853789e+01  -2.6667631e+01   1.0000000e+02  -1.4995046e+00  -2.0477897e+00   7.7934811e+00
   1.7906593e+01  -2.6787090e+01   1.0000000e+02  -1.4672665e+00  -2.1246591e+00   9.1019348e+00
   1.7963299e+01  -2.6905135e+01   1.0000000e+02  -9.8820597e-01  -2.0271950e+00   1.0298675e+01
   1.8023872e+01  -2.7021668e+01   1.0000000e+02  -1.2123414e-01  -1.7976736e+00   1.1268764e+01
   1.8088273e+01  -2.7136588e+01   1.0000000e+02   1.0369858e+00  -1.5103347e+00   1.1914262e+01
   1.8156458e+01  -2.7249797e+01   1.0000000e+02   2.3573979e+00  -1.2520027e+00   1.2162617e+01
   1.8228383e+01  -2.7361197e+01   1.0000000e+02   3.6943685e+00  -1.1016639e+00   1.1980729e+01
   1.8303995e+01  -2.7470694e+01   1.0000000e+02   4.9130960e+00  -1.1196702e+00   1.1377200e+01
   1.8383241e+01  -2.7578191e+01   1.0000000e+02   5.9115309e+00  -1.3420134e+00   1.0382656e+01
   1.8466065e+01  -2.7683597e+01   1.0000000e+02   6.6205769e+00  -1.7694863e+00   9.0242917e+00
   1.8552404e+01  -2.7786818e+01   1.0000000e+02   6.9859833e+00  -2.3554509e+00   7.3215030e+00
   1.8642194e+01  -2.7887765e+01   1.0000000e+02   6.9520698e+00  -3.0057324e+00   5.3084626e+00
   1.8735367e+01  -2.7986350e+01   1.0000000e+02   6.4623733e+00  -3.5979073e+00   3.0656682e+00
   1.8831850e+01  -2.8082485e+01   1.0000000e+02   5.4776331e+00  -4.0131276e+00   7.3630587e-01
   1.8931569e+01  -2.8176085e+01   1.0000000e+02   3.9991837e+00  -4.1663685e+00  -1.4839883e+00
   1.9034443e+01  -2.8267069e+01   1.0000000e+02   2.0842279e+00  -4.0248481e+00  -3.3780836e+00
   1.9140391e+01  -2.8355355e+01   1.0000000e+02  -1.5350446e-01  -3.6137052e+00  -4.7447879e+00
   1.9249326e+01  -2.8440864e+01   1.0000000e+02  -2.5563373e+00  -3.0141786e+00  -5.4328650e+00
   1.9361160e+01  -2.8523521e+01   1.0000000e+02  -4.9446470e+00  -2.3586387e+00  -5.3709385e+00
   1.9475799e+01  -2.8603251e+01   1.0000000e+02  -7.1470986e+00  -1.8158487e+00  -4.5957361e+00
   1.9593148e+01  -2.8679982e+01   1.0000000e+02  -9.0390777e+00  -1.5537278e+00  -3.2664926e+00
   1.9713108e+01  -2.8753646e+01   1.0000000e+02  -1.0577840e+01  -1.6841658e+00  -1.6389210e+00
   1.9835577e+01  -2.8824176e+01   1.0000000e+02  -1.1811258e+01  -2.2227262e+00   7.7308200e-03
   1.9960450e+01  -2.8891508e+01   1.0000000e+02  -1.2847785e+01  -3.0939955e+00   1.4515766e+00
   2.0087619e+01  -2.8955581e+01   1.0000000e+02  -1.3805017e+01  -4.1739389e+00   2.5664360e+00
   2.0216974e+01  -2.9016337e+01   1.0000000e+02  -1.4768415e+01  -5.3329228e+00   3.3088983e+00
   2.0348402e+01  -2.9073720e+01   1.0000000e+02  -1.5776097e+01  -6.4579110e+00   3.6855881e+00
   2.0481786e+01  -2.9127678e+01   1.0000000e+02  -1.6824905e+01  -7.4604687e+00   3.7292071e+00
   2.0617009e+01  -2.9178162e+01   1.0000000e+02  -1.7887187e+01  -8.2842045e+00   3.4867106e+00
   2.0753950e+01  -2.9225125e+01   1.0000000e+02  -1.8929550e+01  -8.9136764e+00   3.0105555e+00
   2.0892486e+01  -2.9268524e+01   1.0000000e+02  -1.9924233e+01  -9.3783032e+00   2.3465828e+00
   2.1032494e+01  -2.9308319e+01   1.0000000e+02  -2.0845998e+01  -9.7447429e+00   1.5152298e+00
   2.1173847e+01  -2.9344474e+01   1.0000000e+02  -2.1660280e+01  -1.0091732e+01   4.8715793e-01
   2.1316416e+01  -2.9376955e+01   1.0000000e+02  -2.2319180e+01  -1.0464331e+01  -8.3255014e-01
   2.1460072e+01  -2.9405732e+01   1.0000000e+02  -2.2774013e+01  -1.0817778e+01  -2.5862563e+00
   2.1604683e+01  -2.9430779e+01   1.0000000e+02  -2.2993214e+01  -1.0979099e+01  -4.8977887e+00
   2.1750119e+01  -2.9452072e+01   1.0000000e+02  -2.2964604e+01  -1.0660954e+01  -7.7777011e+00
   2.1896245e+01  -2.9469592e+01   1.0000000e+02  -2.2673151e+01  -9.5408781e+00  -1.1051894e+01
   2.2042927e+01  -2.9483322e+01   1.0000000e+02  -2.2068933e+01  -7.3717004e+00  -1.4363572e+01
   2.2190030e+01  -2.9493249e+01   1.0000000e+02  -2.1054377e+01  -4.0648610e+00  -1.7239844e+01
   2.2337419e+01  -2.9499366e+01   1.0000000e+02  -1.9513357e+01   2.7047081e-01  -1.9171590e+01
   2.2484958e+01  -2.9501665e+01   1.0000000e+02  -1.7379461e+01   5.3062634e+00  -1.9693397e+01
   2.2632511e+01  -2.9500144e+01   1.0000000e+02  -1.4707670e+01   1.0504059e+01  -1.8499233e+01
   2.2779941e+01  -2.9494806e+01   1.0000000e+02  -1.1696105e+01   1.5215704e+01  -1.5577568e+01
   2.2927114e+01  -2.9485655e+01   1.0000000e+02  -8.6339076e+00   1.8878500e+01  -1.1259950e+01
   2.3073893e+01  -2.9472699e+01   1.0000000e+02  -5.8103274e+00   2.1192858e+01  -6.1122653e+00
   2.3220143e+01  -2.9455950e+01   1.0000000e+02  -3.4423733e+00   2.2167983e+01  -7.2997717e-01
   2.3365730e+01  -2.9435425e+01   1.0000000e+02  -1.6469458e+00   2.2026953e+01   4.4335028e+00
   2.3510521e+01  -2.9411142e+01   1.0000000e+02  -4.4518775e-01   2.1055169e+01   9.1244684e+00
   2.3654382e+01  -2.9383123e+01   1.0000000e+02   2.1921471e-01   1.9487606e+01   1.3239170e+01
   2.3797183e+01  -2.9351395e+01   1.0000000e+02   4.5662173e-01   1.7482961e+01   1.6734441e+01
   2.3938794e+01  -2.9315986e+01   1.0000000e+02   4.0592016e-01   1.5164651e+01   1.9571903e+01
   2.4079086e+01  -2.9276930e+01   1.0000000e+02   2.0952095e-01   1.2666809e+01   2.1722049e+01
   2.4217933e+01  -2.9234263e+01   1.0000000e+02  -8.8669185e-03   1.0140428e+01   2.3196731e+01
   2.4355209e+01  -2.9188023e+01   1.0000000e+02  -1.6170260e-01   7.7248117e+00   2.4064544e+01
   2.4490792e+01  -2.9138253e+01   1.0000000e+02  -2.0856749e-01   5.5170354e+00   2.4433860e+01
   2.4624561e+01  -2.9085000e+01   1.0000000e+02  -1.5801481e-01   3.5630008e+00   2.4418058e+01
   2.4756397e+01  -2.9028311e+01   1.0000000e+02  -5.6928019e-02   1.8718745e+00   2.4105992e+01
   2.4886184e+01  -2.8968238e+01   1.0000000e+02   3.2423194e-02   4.4058568e-01   2.3553935e+01
   2.5013808e+01  -2.8904837e+01   1.0000000e+02   5.9377336e-02  -7.2919950e-01   2.2799828e+01
   2.5139158e+01  -2.8838164e+01   1.0000000e+02   3.8086608e-03  -1.6295912e+00   2.1885510e+01
   2.5262125e+01  -2.8768281e+01   1.0000000e+02  -1.2051715e-01  -2.2536890e+00   2.0871864e+01
   2.5382605e+01  -2.8695251e+01   1.0000000e+02  -2.7786075e-01  -2.6020242e+00   1.9844618e+01
   2.5500495e+01  -2.8619139e+01   1.0000000e+02  -4.3323439e-01  -2.6906527e+00   1.8914932e+01
   2.5615694e+01  -2.8540015e+01   1.0000000e+02  -5.7951167e-01  -2.5682207e+00   1.8206768e+01
   2.5728107e+01  -2.8457949e+01   1.0000000e+02  -7.5418027e-01  -2.3306829e+00   1.7816566e+01
   2.6355445e+01  -2.8089973e+01   1.0000000e+02  -2.6544024e+00  -3.0622910e+00   1.7933844e+01
   2.6449408e+01  -2.7991713e+01   1.0000000e+02  -3.2566658e+00  -3.3001158e+00   1.7725976e+01
   2.6540080e+01  -2.7891132e+01   1.0000000e+02  -3.7768831e+00  -3.3563536e+00   1.7315871e+01
   2.6627397e+01  -2.7788315e+01   1.0000000e+02  -4.1739757e+00  -3.1931130e+00   1.6752358e+01
   2.6711295e+01  -2.7683346e+01   1.0000000e+02  -4.4142644e+00  -2.7962362e+00   1.6116815e+01
   2.6791717e+01  -2.7576312e+01   1.0000000e+02  -4.4977900e+00  -2.1739477e+00   1.5532607e+01
   2.6868606e+01  -2.7467302e+01   1.0000000e+02  -4.4918558e+00  -1.3666459e+00   1.5143529e+01
   2.6941911e+01  -2.7356404e+01   1.0000000e+02  -4.5429237e+00  -4.5285427e-01   1.5054615e+01
   2.7011584e+01  -2.7243711e+01   1.0000000e+02  -4.8443235e+00   4.6295707e-01   1.5262007e+01
   2.7077579e+01  -2.7129314e+01   1.0000000e+02  -5.5624052e+00   1.2815146e+00   1.5616618e+01
   2.7139855e+01  -2.7013306e+01   1.0000000e+02  -6.7522244e+00   1.9448878e+00   1.5854934e+01
   2.7198373e+01  -2.6895781e+01   1.0000000e+02  -8.3080451e+00   2.4591021e+00   1.5697069e+01
   2.7253098e+01  -2.6776834e+01   1.0000000e+02  -9.9869635e+00   2.8877153e+00   1.4972393e+01
   2.7303999e+01  -2.6656561e+01   1.0000000e+02  -1.1508285e+01   3.3135079e+00   1.3699112e+01
   2.7351048e+01  -2.6535059e+01   1.0000000e+02  -1.2670398e+01   3.7892534e+00   1.2058824e+01
   2.7394220e+01  -2.6412423e+01   1.0000000e+02  -1.3405588e+01   4.3117823e+00   1.0290483e+01
   2.7433492e+01  -2.6288753e+01   1.0000000e+02  -1.3756660e+01   4.8336337e+00   8.5924018e+00
   2.7468848e+01  -2.6164146e+01   1.0000000e+02  -1.3828966e+01   5.2955010e+00   7.0820279e+00
   2.7500273e+01  -2.6038700e+01   1.0000000e+02  -1.3758739e+01   5.6548273e+00   5.7903154e+00
   2.7527753e+01  -2.5912516e+01   1.0000000e+02  -1.3686861e+01   5.9000783e+00   4.6577384e+00
   2.7551281e+01  -2.5785691e+01   1.0000000e+02  -1.3715056e+01   6.0528056e+00   3.5383615e+00
   2.7570851e+01  -2.5658325e+01   1.0000000e+02  -1.3852031e+01   6.1605147e+00   2.2399436e+00
   2.7586461e+01  -2.5530518e+01   1.0000000e+02  -1.3988319e+01   6.2789579e+00   6.0683419e-01
   2.7598111e+01  -2.5402369e+01   1.0000000e+02  -1.3935169e+01   6.4450142e+00  -1.3922024e+00
   2.7605805e+01  -2.5273977e+01   1.0000000e+02  -1.3516573e+01   6.6532776e+00  -3.6317472e+00
   2.7609551e+01  -2.5145441e+01   1.0000000e+02  -1.2655098e+01   6.8560767e+00  -5.8793446e+00
   2.7609357e+01  -2.5016861e+01   1.0000000e+02  -1.1396152e+01   6.9943824e+00  -7.8896596e+00
   2.7605236e+01  -2.4888335e+01   1.0000000e+02  -9.8685437e+00   7.0428696e+00  -9.4800607e+00
   2.7597204e+01  -2.4759962e+01   1.0000000e+02  -8.2226508e+00   7.0378067e+00  -1.0554537e+01
   2.7585278e+01  -2.4631839e+01   1.0000000e+02  -6.5879185e+00   7.0674337e+00  -1.1084323e+01
   2.7569480e+01  -2.4504064e+01   1.0000000e+02  -5.0683640e+00   7.2325154e+00  -1.1074725e+01
   2.7549834e+01  -2.4376734e+01   1.0000000e+02  -3.7653491e+00   7.6038607e+00  -1.0550495e+01
   2.7526364e+01  -2.4249945e+01   1.0000000e+02  -2.7957324e+00   8.1981367e+00  -9.5715343e+00
   2.7499101e+01  -2.4123793e+01   1.0000000e+02  -2.2816926e+00   8.9728402e+00  -8.2601933e+00
   2.7468076e+01  -2.3998372e+01   1.0000000e+02  -2.3159552e+00   9.8296256e+00  -6.8144566e+00
   2.7433323e+01  -2.3873777e+01   1.0000000e+02  -2.9164060e+00   1.0623117e+01  -5.4961996e+00
   2.7394878e+01  -2.3750101e+01   1.0000000e+02  -3.9797647e+00   1.1183047e+01  -4.5896632e+00
   2.7352780e+01  -2.3627436e+01   1.0000000e+02  -5.2536612e+00   1.1355966e+01  -4.3222375e+00
   2.7307070e+01  -2.3505874e+01   1.0000000e+02  -6.3682846e+00   1.1056371e+01  -4.7586174e+00
   2.7257792e+01  -2.3385504e+01   1.0000000e+02  -6.9565347e+00   1.0301408e+01  -5.7273787e+00
   2.7204991e+01  -2.3266416e+01   1.0000000e+02  -6.8189888e+00   9.2058477e+00  -6.8572748e+00
   2.7148715e+01  -2.3148697e+01   1.0000000e+02  -6.0248521e+00   7.9380613e+00  -7.7307402e+00
   2.7089014e+01  -2.3032435e+01   1.0000000e+02  -4.8749288e+00   6.6636687e+00  -8.0619515e+00
   2.7025940e+01  -2.2917715e+01   1.0000000e+02  -3.7622405e+00   5.5072551e+00  -7.7919289e+00
   2.6959549e+01  -2.2804620e+01   1.0000000e+02  -3.0288614e+00   4.5409338e+00  -7.0753291e+00
   2.6889895e+01  -2.2693235e+01   1.0000000e+02  -2.8807169e+00   3.7839862e+00  -6.2081341e+00
   2.6817037e+01  -2.2583640e+01   1.0000000e+02  -3.3549987e+00   3.1969980e+00  -5.5405571e+00
   2.6741035e+01  -2.2475915e+01   1.0000000e+02  -4.3190968e+00   2.6770597e+00  -5.3808459e+00
   2.6661951e+01  -2.2370139e+01   1.0000000e+02  -5.5063657e+00   2.0759952e+00  -5.8954291e+00
   2.6579849e+01  -2.2266389e+01   1.0000000e+02  -6.5979436e+00   1.2487695e+00  -7.0442652e+00
   2.6494794e+01  -2.2164739e+01   1.0000000e+02  -7.3273626e+00   1.1079729e-01  -8.5944185e+00
   2.6406854e+01  -2.2065263e+01   1.0000000e+02  -7.5588803e+00  -1.3282256e+00  -1.0212211e+01
   2.6316096e+01  -2.1968034e+01   1.0000000e+02  -7.3039969e+00  -2.9720219e+00  -1.1584824e+01
   2.6222593e+01  -2.1873121e+01   1.0000000e+02  -6.6808079e+00  -4.6786464e+00  -1.2510605e+01
   2.6126416e+01  -2.1780593e+01   1.0000000e+02  -5.8491571e+00  -6.3104676e+00  -1.2928537e+01
   2.6027637e+01  -2.1690516e+01   1.0000000e+02  -4.9535634e+00  -7.7718327e+00  -1.2895030e+01
   2.5926334e+01  -2.1602955e+01   1.0000000e+02  -4.0900188e+00  -9.0255362e+00  -1.2532767e+01
   2.5822581e+01  -2.1517973e+01   1.0000000e+02  -3.2977186e+00  -1.0090518e+01  -1.1975520e+01
   2.5716457e+01  -2.1435631e+01   1.0000000e+02  -2.5671483e+00  -1.1026628e+01  -1.1322303e+01
   2.5608040e+01  -2.1355988e+01   1.0000000e+02  -1.8564776e+00  -1.1907885e+01  -1.0604673e+01
   2.5497412e+01  -2.1279101e+01   1.0000000e+02  -1.1145359e+00  -1.2784659e+01  -9.7757438e+00
   2.5384653e+01  -2.1205024e+01   1.0000000e+02  -3.0732431e-01  -1.3646876e+01  -8.7310551e+00
   2.5269847e+01  -2.1133811e+01   1.0000000e+02   5.5907410e-01  -1.4408072e+01  -7.3588951e+00
   2.5153077e+01  -2.1065512e+01   1.0000000e+02   1.4292190e+00  -1.4923006e+01  -5.6008489e+00
   2.5034429e+01  -2.1000176e+01   1.0000000e+02   2.2107193e+00  -1.5033289e+01  -3.4948963e+00
   2.4913988e+01  -2.0937849e+01   1.0000000e+02   2.8038617e+00  -1.4617470e+01  -1.1802883e+00
   2.4791842e+01  -2.0878576e+01   1.0000000e+02   3.1299890e+00  -1.3622543e+01   1.1287337e+00
   2.4668078e+01  -2.0822399e+01   1.0000000e+02   3.1466032e+00  -1.2079192e+01   3.1777225e+00
   2.4542785e+01  -2.0769358e+01   1.0000000e+02   2.8532653e+00  -1.0115167e+01   4.7132874e+00
   2.4416053e+01  -2.0719489e+01   1.0000000e+02   2.2922427e+00  -7.9548671e+00   5.5453511e+00
   2.4287972e+01  -2.0672830e+01   1.0000000e+02   1.5377302e+00  -5.8756948e+00   5.6135300e+00
   2.4158634e+01  -2.0629412e+01   1.0000000e+02   6.7177022e-01  -4.1257726e+00   5.0090064e+00
   2.4028130e+01  -2.0589266e+01   1.0000000e+02  -2.4035062e-01  -2.8511481e+00   3.9281179e+00
   2.3896552e+01  -2.0552422e+01   1.0000000e+02  -1.1601908e+00  -2.0759589e+00   2.5878206e+00
   2.3763993e+01  -2.0518904e+01   1.0000000e+02  -2.0693572e+00  -1.7377836e+00   1.1552077e+00
   2.3630548e+01  -2.0488737e+01   1.0000000e+02  -2.9561269e+00  -1.7468120e+00  -2.7653952e-01
   2.3496310e+01  -2.0461942e+01   1.0000000e+02  -3.8075596e+00  -2.0317932e+00  -1.6703085e+00
   2.3361374e+01  -2.0438538e+01   1.0000000e+02  -4.6095898e+00  -2.5569314e+00  -3.0130782e+00
   2.3225834e+01  -2.0418541e+01   1.0000000e+02  -5.3487412e+00  -3.3181183e+00  -4.2912992e+00
   2.3089785e+01  -2.0401965e+01   1.0000000e+02  -6.0093854e+00  -4.3313533e+00  -5.4750697e+00
   2.2953324e+01  -2.0388823e+01   1.0000000e+02  -6.5680341e+00  -5.6169579e+00  -6.5063873e+00
   2.2816545e+01  -2.0379124e+01   1.0000000e+02  -6.9916342e+00  -7.1784807e+00  -7.2940630e+00
   2.2679544e+01  -2.0372873e+01   1.0000000e+02  -7.2463311e+00  -8.9796056e+00  -7.7245643e+00
   2.2542418e+01  -2.0370077e+01   1.0000000e+02  -7.3159154e+00  -1.0932454e+01  -7.6942609e+00
   2.2405262e+01  -2.0370736e+01   1.0000000e+02  -7.2179828e+00  -1.2912972e+01  -7.1506458e+00
   2.2268172e+01  -2.0374850e+01   1.0000000e+02  -7.0037716e+00  -1.4801958e+01  -6.1137754e+00
   2.2131245e+01  -2.0382417e+01   1.0000000e+02  -6.7405988e+00  -1.6526556e+01  -4.6586969e+00
   2.1994576e+01  -2.0393431e+01   1.0000000e+02  -6.4894558e+00  -1.8072905e+01  -2.8685194e+00
   2.1858260e+01  -2.0407884e+01   1.0000000e+02  -6.2898014e+00  -1.9461032e+01  -7.8961615e-01
   2.1722394e+01  -2.0425766e+01   1.0000000e+02  -6.1537959e+00  -2.0698410e+01   1.5825098e+00
   2.1587073e+01  -2.0447065e+01   1.0000000e+02  -6.0671039e+00  -2.1740327e+01   4.2787152e+00
   2.1452392e+01  -2.0471765e+01   1.0000000e+02  -5.9952111e+00  -2.2480023e+01   7.3074392e+00
   2.1318446e+01  -2.0499849e+01   1.0000000e+02  -5.8949883e+00  -2.2775192e+01   1.0609133e+01
   2.1185328e+01  -2.0531297e+01   1.0000000e+02  -5.7280402e+00  -2.2498968e+01   1.4038538e+01
   2.1053132e+01  -2.0566086e+01   1.0000000e+02  -5.4706455e+00  -2.1592038e+01   1.7384363e+01
   2.0921953e+01  -2.0604193e+01   1.0000000e+02  -5.1183408e+00  -2.0091698e+01   2.0417720e+01
   2.0791883e+01  -2.0645591e+01   1.0000000e+02  -4.6865635e+00  -1.8125500e+01   2.2946600e+01
   2.0663013e+01  -2.0690249e+01   1.0000000e+02  -4.2076456e+00  -1.5877093e+01   2.4853474e+01
   2.0535436e+01  -2.0738137e+01   1.0000000e+02  -3.7225912e+00  -1.3543322e+01   2.6107351e+01
   2.0409243e+01  -2.0789220e+01   1.0000000e+02  -3.2683466e+00  -1.1297650e+01   2.6754790e+01
   2.0284523e+01  -2.0843462e+01   1.0000000e+02  -2.8653478e+00  -9.2660791e+00   2.6897778e+01
   2.0161365e+01  -2.0900825e+01   1.0000000e+02  -2.5114857e+00  -7.5156518e+00   2.6665792e+01
   2.0039859e+01  -2.0961268e+01   1.0000000e+02  -2.1847436e+00  -6.0549461e+00   2.6186407e+01
   1.9920092e+01  -2.1024748e+01   1.0000000e+02  -1.8528789e+00  -4.8478158e+00   2.5559582e+01
   1.9802151e+01  -2.1091220e+01   1.0000000e+02  -1.4859860e+00  -3.8380805e+00   2.4844422e+01
   1.9686120e+01  -2.1160637e+01   1.0000000e+02  -1.0663956e+00  -2.9743431e+00   2.4063416e+01
   1.9572085e+01  -2.1232948e+01   1.0000000e+02  -5.9233939e-01  -2.2244932e+00   2.3217904e+01
   1.9460129e+01  -2.1308104e+01   1.0000000e+02  -7.6608805e-02  -1.5781781e+00   2.2304375e+01
   1.9350335e+01  -2.1386049e+01   1.0000000e+02   4.5628939e-01  -1.0414763e+00   2.1327386e+01
   1.9242784e+01  -2.1466728e+01   1.0000000e+02   9.7399019e-01  -6.2704564e-01   2.0308984e+01
   1.9137555e+01  -2.1550084e+01   1.0000000e+02   1.4433249e+00  -3.4206324e-01   1.9293864e+01
   1.9034727e+01  -2.1636057e+01   1.0000000e+02   1.8416768e+00  -1.7673798e-01   1.8345586e+01
   1.8934378e+01  -2.1724585e+01   1.0000000e+02   2.1675250e+00  -9.8393886e-02   1.7529667e+01
   1.8836583e+01  -2.1815605e+01   1.0000000e+02   2.4406602e+00  -5.6919484e-02   1.6888921e+01
   1.8741417e+01  -2.1909051e+01   1.0000000e+02   2.6887476e+00  -1.4179630e-03   1.6427150e+01
   1.8648953e+01  -2.2004856e+01   1.0000000e+02   2.9298540e+00   1.0047824e-01   1.6113962e+01
   1.8559262e+01  -2.2102951e+01   1.0000000e+02   3.1653998e+00   2.5158039e-01   1.5908230e+01
   1.8472415e+01  -2.2203264e+01   1.0000000e+02   3.3896209e+00   4.2983955e-01   1.5784059e+01
   1.8388478e+01  -2.2305724e+01   1.0000000e+02   3.6074798e+00   6.0743932e-01   1.5739953e+01
   1.8307520e+01  -2.2410257e+01   1.0000000e+02   3.8442570e+00   7.7097513e-01   1.5784012e+01
   1.8229604e+01  -2.2516785e+01   1.0000000e+02   4.1374455e+00   9.2751894e-01   1.5910229e+01
   1.8154795e+01  -2.2625233e+01   1.0000000e+02   4.5193642e+00   1.0963674e+00   1.6087719e+01
   1.8083152e+01  -2.2735520e+01   1.0000000e+02   5.0059898e+00   1.2990572e+00   1.6266369e+01
   1.8014736e+01  -2.2847567e+01   1.0000000e+02   5.5942367e+00   1.5552194e+00   1.6384780e+01
   1.7949604e+01  -2.2961291e+01   1.0000000e+02   6.2581405e+00   1.8782437e+00   1.6374619e+01
   1.7887810e+01  -2.3076610e+01   1.0000000e+02   6.9421841e+00   2.2655405e+00   1.6171941e+01
   1.7829410e+01  -2.3193438e+01   1.0000000e+02   7.5640216e+00   2.6900277e+00   1.5741512e+01
   1.7774454e+01  -2.3311689e+01   1.0000000e+02   8.0350279e+00   3.1034898e+00   1.5100554e+01
   1.7722991e+01  -2.3431277e+01   1.0000000e+02   8.2900346e+00   3.4527944e+00   1.4323191e+01
   1.7675069e+01  -2.3552112e+01   1.0000000e+02   8.3094402e+00   3.7000612e+00   1.3520486e+01
   1.7630732e+01  -2.3674106e+01   1.0000000e+02   8.1219415e+00   3.8356608e+00   1.2807528e+01
   1.7590022e+01  -2.3797168e+01   1.0000000e+02   7.7911010e+00   3.8781844e+00   1.2277567e+01
   1.7552981e+01  -2.3921205e+01   1.0000000e+02   7.4026793e+00   3.8656069e+00   1.1991383e+01
   1.7519646e+01  -2.4046126e+01   1.0000000e+02   7.0608443e+00   3.8462337e+00   1.1968787e+01
   1.7490053e+01  -2.4171837e+01   1.0000000e+02   6.8786029e+00   3.8714766e+00   1.2171527e+01
   1.7464233e+01  -2.4298243e+01   1.0000000e+02   6.9478780e+00   3.9860456e+00   1.2491865e+01
   1.7442219e+01  -2.4425250e+01   1.0000000e+02   7.3000037e+00   4.2144786e+00   1.2769211e+01
   1.7424038e+01  -2.4552761e+01   1.0000000e+02   7.8828003e+00   4.5499348e+00   1.2836449e+01
   1.7409714e+01  -2.4680680e+01   1.0000000e+02   8.5715371e+00   4.9521815e+00   1.2575092e+01
   1.7399272e+01  -2.4808910e+01   1.0000000e+02   9.2105490e+00   5.3565034e+00   1.1951329e+01
   1.7392729e+01  -2.4937353e+01   1.0000000e+02   9.6640857e+00   5.6887812e+00   1.1015540e+01
   1.7390105e+01  -2.5065911e+01   1.0000000e+02   9.8500990e+00   5.8797185e+00   9.8705482e+00
   1.7391413e+01  -2.5194486e+01   1.0000000e+02   9.7449164e+00   5.8760764e+00   8.6310138e+00
   1.7396664e+01  -2.5322979e+01   1.0000000e+02   9.3664900e+00   5.6499264e+00   7.3949804e+00
   1.7405867e+01  -2.5451290e+01   1.0000000e+02   8.7509733e+00   5.2050569e+00   6.2331377e+00
   1.7419027e+01  -2.5579320e+01   1.0000000e+02   7.9323162e+00   4.5762957e+00   5.1925448e+00
   1.7436148e+01  -2.5706971e+01   1.0000000e+02   6.9308515e+00   3.8201881e+00   4.3109678e+00
   1.7457228e+01  -2.5834142e+01   1.0000000e+02   5.7567815e+00   3.0013079e+00   3.6357997e+00
   1.7482265e+01  -2.5960734e+01   1.0000000e+02   4.4307815e+00   2.1798107e+00   3.2353400e+00
   1.7511251e+01  -2.6086648e+01   1.0000000e+02   3.0112301e+00   1.4039411e+00   3.1877291e+00
   1.7544176e+01  -2.6211786e+01   1.0000000e+02   1.6060814e+00   7.0855329e-01   3.5480019e+00
   1.7581028e+01  -2.6336047e+01   1.0000000e+02   3.5738194e-01   1.1848206e-01   4.3149287e+00
   1.7621791e+01  -2.6459334e+01   1.0000000e+02  -5.9061223e-01  -3.4699324e-01   5.4185057e+00
   1.7666444e+01  -2.6581549e+01   1.0000000e+02  -1.1222588e+00  -6.7071819e-01   6.7293943e+00
   1.7714966e+01  -2.6702594e+01   1.0000000e+02  -1.1733579e+00  -8.3603402e-01   8.0827431e+00
   1.7767330e+01  -2.6822373e+01   1.0000000e+02  -7.4327818e-01  -8.3056975e-01   9.3101078e+00
[truncated: 3,642,157 more chars]
