# Supplementary material for: A high-resolution lithospheric magnetic field model over southern Africa based on a joint inversion of CHAMP, Swarm, WDMAM, and ground magnetic field data
Source: Copernicus journal article supplement (doi:10.5194/se-9-897-2018), 2018-07-16
Supplement: Supplementary file 1 [file se-9-897-2018-supplement.zip › SupplementaryMaterial/ModelSA150km.txt]

   2.2500005e+01  -2.4999991e+01   1.5000000e+02   7.1776179e+00  -6.4919902e+00  -1.7513737e+01
   2.2566483e+01  -2.5124977e+01   1.5000000e+02   5.7741322e+00  -5.4162480e+00  -1.8752790e+01
   2.2649272e+01  -2.5030796e+01   1.5000000e+02   6.0710870e+00  -5.6040456e+00  -1.8717144e+01
   2.2619593e+01  -2.4913455e+01   1.5000000e+02   7.2395294e+00  -6.4970412e+00  -1.7717886e+01
   2.2500000e+01  -2.4861269e+01   1.5000000e+02   8.2737921e+00  -7.2599139e+00  -1.6471695e+01
   2.2380407e+01  -2.4913455e+01   1.5000000e+02   8.4391250e+00  -7.3420226e+00  -1.6079123e+01
   2.2350728e+01  -2.5030796e+01   1.5000000e+02   7.7022995e+00  -6.8144343e+00  -1.6779806e+01
   2.2433517e+01  -2.5124977e+01   1.5000000e+02   6.5437438e+00  -6.0027519e+00  -1.7933081e+01
   2.2791110e+01  -2.5050403e+01   1.5000000e+02   4.9840723e+00  -4.5588186e+00  -1.9730379e+01
   2.2783469e+01  -2.4922052e+01   1.5000000e+02   6.2021950e+00  -5.5342731e+00  -1.8918719e+01
   2.2711005e+01  -2.4811602e+01   1.5000000e+02   7.5936057e+00  -6.6625584e+00  -1.7597096e+01
   2.2590406e+01  -2.4744279e+01   1.5000000e+02   8.7477493e+00  -7.5556266e+00  -1.6141316e+01
   2.2449214e+01  -2.4735429e+01   1.5000000e+02   9.4410413e+00  -8.0200574e+00  -1.5051048e+01
   2.2319588e+01  -2.4787069e+01   1.5000000e+02   9.6086637e+00  -8.0649124e+00  -1.4645359e+01
   2.2231095e+01  -2.4887431e+01   1.5000000e+02   9.2700321e+00  -7.7844306e+00  -1.4953691e+01
   2.2204049e+01  -2.5013608e+01   1.5000000e+02   8.5073281e+00  -7.2576342e+00  -1.5805421e+01
   2.2244821e+01  -2.5136726e+01   1.5000000e+02   7.4388237e+00  -6.5363732e+00  -1.6943538e+01
   2.2344231e+01  -2.5228534e+01   1.5000000e+02   6.2294356e+00  -5.7024745e+00  -1.8095689e+01
   2.2479512e+01  -2.5267912e+01   1.5000000e+02   5.1287266e+00  -4.8886342e+00  -1.9057255e+01
   2.2619515e+01  -2.5245788e+01   1.5000000e+02   4.4209850e+00  -4.2753668e+00  -1.9708051e+01
   2.2731985e+01  -2.5167260e+01   1.5000000e+02   4.3397312e+00  -4.1058964e+00  -1.9962421e+01
   2.2627648e+01  -2.4622121e+01   1.5000000e+02   9.4857571e+00  -8.0302564e+00  -1.5291471e+01
   2.2485785e+01  -2.4604968e+01   1.5000000e+02   1.0194344e+01  -8.5087651e+00  -1.4087702e+01
   2.2345448e+01  -2.4630489e+01   1.5000000e+02   1.0560257e+01  -8.6700959e+00  -1.3385124e+01
   2.2221716e+01  -2.4695945e+01   1.5000000e+02   1.0585629e+01  -8.5846176e+00  -1.3237662e+01
   2.2127926e+01  -2.4794296e+01   1.5000000e+02   1.0283234e+01  -8.3205116e+00  -1.3590547e+01
   2.2074261e+01  -2.4914949e+01   1.5000000e+02   9.6943188e+00  -7.9192532e+00  -1.4335296e+01
   2.2066638e+01  -2.5044874e+01   1.5000000e+02   8.8728116e+00  -7.3869058e+00  -1.5352741e+01
   2.2106024e+01  -2.5169999e+01   1.5000000e+02   7.8576534e+00  -6.7164833e+00  -1.6512240e+01
   2.2188274e+01  -2.5276731e+01   1.5000000e+02   6.6938792e+00  -5.9284659e+00  -1.7665866e+01
   2.2304526e+01  -2.5353443e+01   1.5000000e+02   5.4776221e+00  -5.0791570e+00  -1.8692488e+01
   2.2442139e+01  -2.5391760e+01   1.5000000e+02   4.3504981e+00  -4.2293066e+00  -1.9535981e+01
   2.2586081e+01  -2.5387492e+01   1.5000000e+02   3.4550173e+00  -3.4436982e+00  -2.0175833e+01
   2.2720608e+01  -2.5341106e+01   1.5000000e+02   2.9119181e+00  -2.8402301e+00  -2.0594952e+01
   2.2831035e+01  -2.5257672e+01   1.5000000e+02   2.8248807e+00  -2.5957631e+00  -2.0787271e+01
   2.2905370e+01  -2.5146297e+01   1.5000000e+02   3.2713782e+00  -2.8593571e+00  -2.0738694e+01
   2.2935626e+01  -2.5019107e+01   1.5000000e+02   4.2490809e+00  -3.6452906e+00  -2.0374189e+01
   2.2918657e+01  -2.4889911e+01   1.5000000e+02   5.6123283e+00  -4.8005461e+00  -1.9580187e+01
   2.2856438e+01  -2.4772694e+01   1.5000000e+02   7.0951989e+00  -6.0692602e+00  -1.8335514e+01
   2.2755800e+01  -2.4680108e+01   1.5000000e+02   8.4370342e+00  -7.2002651e+00  -1.6806243e+01
   2.2005477e+01  -2.4730152e+01   1.5000000e+02   1.1098699e+01  -8.6829802e+00  -1.2397702e+01
   2.1948449e+01  -2.4845263e+01   1.5000000e+02   1.0568151e+01  -8.3468207e+00  -1.3143589e+01
   2.1923356e+01  -2.4969413e+01   1.5000000e+02   9.8832900e+00  -7.9416364e+00  -1.4082875e+01
   2.1931748e+01  -2.5095402e+01   1.5000000e+02   9.0686435e+00  -7.4437916e+00  -1.5163079e+01
   2.1973238e+01  -2.5215904e+01   1.5000000e+02   8.1230137e+00  -6.8299239e+00  -1.6314180e+01
   2.2045499e+01  -2.5323890e+01   1.5000000e+02   7.0474696e+00  -6.1026846e+00  -1.7439374e+01
   2.2144380e+01  -2.5413044e+01   1.5000000e+02   5.8800633e+00  -5.2973037e+00  -1.8447889e+01
   2.2264136e+01  -2.5478137e+01   1.5000000e+02   4.6990457e+00  -4.4578344e+00  -1.9296407e+01
   2.2397759e+01  -2.5515346e+01   1.5000000e+02   3.5952328e+00  -3.6088835e+00  -1.9987878e+01
   2.2537398e+01  -2.5522483e+01   1.5000000e+02   2.6452822e+00  -2.7622934e+00  -2.0532663e+01
   2.2674836e+01  -2.5499126e+01   1.5000000e+02   1.9057671e+00  -1.9574583e+00  -2.0926204e+01
   2.2801990e+01  -2.5446650e+01   1.5000000e+02   1.4229992e+00  -1.2899524e+00  -2.1167503e+01
   2.2911403e+01  -2.5368141e+01   1.5000000e+02   1.2463539e+00  -8.9485207e-01  -2.1282203e+01
   2.2996693e+01  -2.5268206e+01   1.5000000e+02   1.4336947e+00  -8.9572100e-01  -2.1306768e+01
   2.3052932e+01  -2.5152698e+01   1.5000000e+02   2.0359315e+00  -1.3525691e+00  -2.1237381e+01
   2.3076921e+01  -2.5028363e+01   1.5000000e+02   3.0559286e+00  -2.2346285e+00  -2.0993242e+01
   2.3067361e+01  -2.4902443e+01   1.5000000e+02   4.4063021e+00  -3.4272800e+00  -2.0445430e+01
   2.3024906e+01  -2.4782247e+01   1.5000000e+02   5.9140927e+00  -4.7661438e+00  -1.9504438e+01
   2.2952106e+01  -2.4674736e+01   1.5000000e+02   7.3844972e+00  -6.0801403e+00  -1.8194475e+01
   2.2853234e+01  -2.4586117e+01   1.5000000e+02   8.6738647e+00  -7.2282798e+00  -1.6656231e+01
   2.2734035e+01  -2.4521494e+01   1.5000000e+02   9.7178498e+00  -8.1220493e+00  -1.5091946e+01
   2.2601387e+01  -2.4484584e+01   1.5000000e+02   1.0511869e+01  -8.7311566e+00  -1.3700659e+01
   2.2462919e+01  -2.4477508e+01   1.5000000e+02   1.1074330e+01  -9.0729090e+00  -1.2633525e+01
   2.2326579e+01  -2.4500672e+01   1.5000000e+02   1.1418288e+01  -9.1909336e+00  -1.1974722e+01
   2.2200199e+01  -2.4552745e+01   1.5000000e+02   1.1541045e+01  -9.1353597e+00  -1.1743291e+01
   2.2091059e+01  -2.4630734e+01   1.5000000e+02   1.1433073e+01  -8.9531284e+00  -1.1906278e+01
   2.1844868e+01  -2.5273528e+01   1.5000000e+02   8.2498499e+00  -6.9387989e+00  -1.6316808e+01
   2.1916247e+01  -2.5384116e+01   1.5000000e+02   7.1890431e+00  -6.2199303e+00  -1.7480385e+01
   2.2010268e+01  -2.5479941e+01   1.5000000e+02   6.0175054e+00  -5.4055503e+00  -1.8511681e+01
   2.2123330e+01  -2.5557281e+01   1.5000000e+02   4.7961878e+00  -4.5442942e+00  -1.9362114e+01
   2.2251066e+01  -2.5613127e+01   1.5000000e+02   3.6038151e+00  -3.6695850e+00  -2.0039784e+01
   2.2388512e+01  -2.5645302e+01   1.5000000e+02   2.5094652e+00  -2.7824873e+00  -2.0578638e+01
   2.2530311e+01  -2.5652548e+01   1.5000000e+02   1.5602042e+00  -1.8702590e+00  -2.0996344e+01
   2.2670926e+01  -2.5634584e+01   1.5000000e+02   7.8387213e-01  -9.4602558e-01  -2.1282821e+01
   2.2804870e+01  -2.5592111e+01   1.5000000e+02   1.9792917e-01  -7.5251004e-02  -2.1426523e+01
   2.2926927e+01  -2.5526786e+01   1.5000000e+02  -1.8016880e-01   6.3129839e-01  -2.1448471e+01
   2.3032366e+01  -2.5441153e+01   1.5000000e+02  -3.2147214e-01   1.0503407e+00  -2.1409301e+01
   2.3117126e+01  -2.5338544e+01   1.5000000e+02  -1.7763000e-01   1.0834513e+00  -2.1378566e+01
   2.3177977e+01  -2.5222939e+01   1.5000000e+02   3.1265151e-01   6.8413892e-01  -2.1382546e+01
   2.3212635e+01  -2.5098809e+01   1.5000000e+02   1.1934314e+00  -1.3064205e-01  -2.1363159e+01
   2.3219844e+01  -2.4970944e+01   1.5000000e+02   2.4463630e+00  -1.2854104e+00  -2.1183538e+01
   2.3199412e+01  -2.4844261e+01   1.5000000e+02   3.9655654e+00  -2.6641371e+00  -2.0690467e+01
   2.3152206e+01  -2.4723616e+01   1.5000000e+02   5.5826898e+00  -4.1331603e+00  -1.9795355e+01
   2.3080104e+01  -2.4613620e+01   1.5000000e+02   7.1288043e+00  -5.5627058e+00  -1.8517537e+01
   2.2985914e+01  -2.4518468e+01   1.5000000e+02   8.4881118e+00  -6.8442121e+00  -1.6970813e+01
   2.2873265e+01  -2.4441779e+01   1.5000000e+02   9.6140019e+00  -7.9023535e+00  -1.5318323e+01
   2.2746461e+01  -2.4386462e+01   1.5000000e+02   1.0512184e+01  -8.7008365e+00  -1.3728172e+01
   2.2610323e+01  -2.4354616e+01   1.5000000e+02   1.1212228e+01  -9.2408348e+00  -1.2343740e+01
   2.2470010e+01  -2.4347446e+01   1.5000000e+02   1.1743964e+01  -9.5512734e+00  -1.1267272e+01
   2.2330831e+01  -2.4365223e+01   1.5000000e+02   1.2123136e+01  -9.6730558e+00  -1.0554850e+01
   2.2198056e+01  -2.4407274e+01   1.5000000e+02   1.2345683e+01  -9.6457385e+00  -1.0221167e+01
   2.2076722e+01  -2.4472006e+01   1.5000000e+02   1.2391772e+01  -9.5042875e+00  -1.0248078e+01
   2.1971451e+01  -2.4556965e+01   1.5000000e+02   1.2240852e+01  -9.2823127e+00  -1.0591033e+01
   2.1886278e+01  -2.4658924e+01   1.5000000e+02   1.1891705e+01  -9.0111661e+00  -1.1187230e+01
   2.1824496e+01  -2.4774000e+01   1.5000000e+02   1.1372711e+01  -8.7113342e+00  -1.1972855e+01
   2.1788530e+01  -2.4897801e+01   1.5000000e+02   1.0730032e+01  -8.3826692e+00  -1.2903363e+01
   2.1779836e+01  -2.5025590e+01   1.5000000e+02   9.9986978e+00  -8.0018216e+00  -1.3957177e+01
   2.1798831e+01  -2.5152461e+01   1.5000000e+02   9.1802949e+00  -7.5312271e+00  -1.5112635e+01
   2.2206112e+01  -2.5734817e+01   1.5000000e+02   2.6995960e+00  -3.1376407e+00  -2.0581179e+01
   2.2344390e+01  -2.5768576e+01   1.5000000e+02   1.5994562e+00  -2.2243011e+00  -2.0997306e+01
   2.2486994e+01  -2.5781239e+01   1.5000000e+02   6.3803274e-01  -1.2722581e+00  -2.1316046e+01
   2.2629959e+01  -2.5772455e+01   1.5000000e+02  -1.6897606e-01  -2.6973961e-01  -2.1523629e+01
   2.2769312e+01  -2.5742469e+01   1.5000000e+02  -8.1673831e-01   7.5005693e-01  -2.1590862e+01
   2.2901183e+01  -2.5692114e+01   1.5000000e+02  -1.3070358e+00   1.7062978e+00  -2.1510374e+01
   2.3021922e+01  -2.5622788e+01   1.5000000e+02  -1.6415990e+00   2.4910270e+00  -2.1321602e+01
   2.3128207e+01  -2.5536414e+01   1.5000000e+02  -1.8107262e+00   2.9981919e+00  -2.1107864e+01
   2.3217130e+01  -2.5435380e+01   1.5000000e+02  -1.7810862e+00   3.1471427e+00  -2.0966500e+01
   2.3286284e+01  -2.5322476e+01   1.5000000e+02  -1.4918856e+00   2.8963001e+00  -2.0963557e+01
   2.3333824e+01  -2.5200810e+01   1.5000000e+02  -8.6992411e-01   2.2478507e+00  -2.1089797e+01
   2.3358512e+01  -2.5073722e+01   1.5000000e+02   1.3240407e-01   1.2447331e+00  -2.1241639e+01
   2.3359744e+01  -2.4944688e+01   1.5000000e+02   1.4936542e+00  -3.8755018e-02  -2.1248757e+01
   2.3337560e+01  -2.4817228e+01   1.5000000e+02   3.1078438e+00  -1.5086549e+00  -2.0942195e+01
   2.3292633e+01  -2.4694808e+01   1.5000000e+02   4.8143978e+00  -3.0623416e+00  -2.0223148e+01
   2.3226246e+01  -2.4580748e+01   1.5000000e+02   6.4540949e+00  -4.5984662e+00  -1.9092608e+01
   2.3140249e+01  -2.4478131e+01   1.5000000e+02   7.9150637e+00  -6.0264980e+00  -1.7635764e+01
   2.3037005e+01  -2.4389725e+01   1.5000000e+02   9.1480905e+00  -7.2749384e+00  -1.5984296e+01
   2.2919326e+01  -2.4317909e+01   1.5000000e+02   1.0155258e+01  -8.2971430e+00  -1.4281553e+01
   2.2790392e+01  -2.4264612e+01   1.5000000e+02   1.0967362e+01  -9.0742696e+00  -1.2660611e+01
   2.2653675e+01  -2.4231265e+01   1.5000000e+02   1.1623148e+01  -9.6145586e+00  -1.1232279e+01
   2.2512842e+01  -2.4218760e+01   1.5000000e+02   1.2155781e+01  -9.9471074e+00  -1.0077283e+01
   2.2371665e+01  -2.4227433e+01   1.5000000e+02   1.2585096e+01  -1.0109522e+01  -9.2428945e+00
   2.2233924e+01  -2.4257052e+01   1.5000000e+02   1.2913017e+01  -1.0135228e+01  -8.7465687e+00
   2.2103315e+01  -2.4306822e+01   1.5000000e+02   1.3122260e+01  -1.0049154e+01  -8.5843905e+00
   2.1983349e+01  -2.4375409e+01   1.5000000e+02   1.3181801e+01  -9.8735259e+00  -8.7360593e+00
   2.1877268e+01  -2.4460971e+01   1.5000000e+02   1.3060995e+01  -9.6350805e+00  -9.1633047e+00
   2.1787954e+01  -2.4561206e+01   1.5000000e+02   1.2747993e+01  -9.3643655e+00  -9.8097884e+00
   2.1717858e+01  -2.4673412e+01   1.5000000e+02   1.2262068e+01  -9.0869796e+00  -1.0612433e+01
   2.1668928e+01  -2.4794557e+01   1.5000000e+02   1.1649850e+01  -8.8133692e+00  -1.1522435e+01
   2.1642551e+01  -2.4921357e+01   1.5000000e+02   1.0963468e+01  -8.5329083e+00  -1.2521204e+01
   2.1639516e+01  -2.5050367e+01   1.5000000e+02   1.0231723e+01  -8.2143910e+00  -1.3614905e+01
   2.1659977e+01  -2.5178069e+01   1.5000000e+02   9.4442434e+00  -7.8136682e+00  -1.4805691e+01
   2.1703447e+01  -2.5300971e+01   1.5000000e+02   8.5619703e+00  -7.2887973e+00  -1.6059063e+01
   2.1768802e+01  -2.5415702e+01   1.5000000e+02   7.5486806e+00  -6.6197932e+00  -1.7294283e+01
   2.1854304e+01  -2.5519106e+01   1.5000000e+02   6.4021644e+00  -5.8227873e+00  -1.8410293e+01
   2.1957642e+01  -2.5608328e+01   1.5000000e+02   5.1643935e+00  -4.9455270e+00  -1.9331945e+01
   2.2075997e+01  -2.5680903e+01   1.5000000e+02   3.9060524e+00  -4.0413071e+00  -2.0043163e+01
   2.2817160e+01  -2.5862456e+01   1.5000000e+02  -2.1813609e+00   2.0940528e+00  -2.1631582e+01
   2.2950195e+01  -2.5812714e+01   1.5000000e+02  -2.6099093e+00   3.1535437e+00  -2.1371758e+01
   2.3073880e+01  -2.5746332e+01   1.5000000e+02  -2.9199484e+00   4.0635630e+00  -2.0985433e+01
   2.3185665e+01  -2.5664687e+01   1.5000000e+02  -3.1247679e+00   4.7313186e+00  -2.0557792e+01
   2.3283263e+01  -2.5569471e+01   1.5000000e+02  -3.2190425e+00   5.0859623e+00  -2.0201313e+01
   2.3364693e+01  -2.5462651e+01   1.5000000e+02  -3.1661703e+00   5.0859797e+00  -2.0022547e+01
   2.3428322e+01  -2.5346430e+01   1.5000000e+02  -2.8953719e+00   4.7203899e+00  -2.0082758e+01
   2.3472896e+01  -2.5223196e+01   1.5000000e+02  -2.3181974e+00   4.0062278e+00  -2.0361991e+01
   2.3497562e+01  -2.5095476e+01   1.5000000e+02  -1.3672089e+00   2.9830806e+00  -2.0745315e+01
   2.3501877e+01  -2.4965878e+01   1.5000000e+02  -3.9932140e-02   1.7063067e+00  -2.1049489e+01
   2.3485818e+01  -2.4837042e+01   1.5000000e+02   1.5813844e+00   2.4219660e-01  -2.1084718e+01
   2.3449774e+01  -2.4711583e+01   1.5000000e+02   3.3509800e+00  -1.3350355e+00  -2.0719316e+01
   2.3394533e+01  -2.4592042e+01   1.5000000e+02   5.1083591e+00  -2.9466023e+00  -1.9913232e+01
   2.3321262e+01  -2.4480829e+01   1.5000000e+02   6.7250917e+00  -4.5146706e+00  -1.8711271e+01
   2.3231482e+01  -2.4380185e+01   1.5000000e+02   8.1281709e+00  -5.9689823e+00  -1.7212270e+01
   2.3127031e+01  -2.4292130e+01   1.5000000e+02   9.2986086e+00  -7.2529105e+00  -1.5536320e+01
   2.3010031e+01  -2.4218429e+01   1.5000000e+02   1.0255293e+01  -8.3274047e+00  -1.3803083e+01
   2.2882839e+01  -2.4160555e+01   1.5000000e+02   1.1035906e+01  -9.1735758e+00  -1.2121730e+01
   2.2748007e+01  -2.4119665e+01   1.5000000e+02   1.1681778e+01  -9.7940347e+00  -1.0586778e+01
   2.2608231e+01  -2.4096575e+01   1.5000000e+02   1.2228992e+01  -1.0211320e+01  -9.2735316e+00
   2.2466298e+01  -2.4091744e+01   1.5000000e+02   1.2703892e+01  -1.0460311e+01  -8.2327213e+00
   2.2325037e+01  -2.4105269e+01   1.5000000e+02   1.3119911e+01  -1.0575545e+01  -7.4893909e+00
   2.2187263e+01  -2.4136881e+01   1.5000000e+02   1.3474249e+01  -1.0580805e+01  -7.0493422e+00
   2.2055726e+01  -2.4185949e+01   1.5000000e+02   1.3745901e+01  -1.0488914e+01  -6.9087776e+00
   2.1933060e+01  -2.4251493e+01   1.5000000e+02   1.3898688e+01  -1.0311367e+01  -7.0576802e+00
   2.1821731e+01  -2.4332204e+01   1.5000000e+02   1.3891686e+01  -1.0068220e+01  -7.4736453e+00
   2.1723990e+01  -2.4426466e+01   1.5000000e+02   1.3695145e+01  -9.7892704e+00  -8.1140341e+00
   2.1641829e+01  -2.4532388e+01   1.5000000e+02   1.3305608e+01  -9.5063742e+00  -8.9178447e+00
   2.1576941e+01  -2.4647842e+01   1.5000000e+02   1.2752587e+01  -9.2431385e+00  -9.8212651e+00
   2.1530681e+01  -2.4770499e+01   1.5000000e+02   1.2091117e+01  -9.0075265e+00  -1.0780101e+01
   2.1504041e+01  -2.4897882e+01   1.5000000e+02   1.1380089e+01  -8.7888989e+00  -1.1785518e+01
   2.1497622e+01  -2.5027408e+01   1.5000000e+02   1.0655378e+01  -8.5585783e+00  -1.2859944e+01
   2.1511616e+01  -2.5156444e+01   1.5000000e+02   9.9125382e+00  -8.2733205e+00  -1.4031405e+01
   2.1545804e+01  -2.5282358e+01   1.5000000e+02   9.1107198e+00  -7.8834024e+00  -1.5299155e+01
   2.1599547e+01  -2.5402574e+01   1.5000000e+02   8.1970197e+00  -7.3471999e+00  -1.6611711e+01
   2.1671799e+01  -2.5514624e+01   1.5000000e+02   7.1381106e+00  -6.6491638e+00  -1.7873139e+01
   2.1761122e+01  -2.5616202e+01   1.5000000e+02   5.9418297e+00  -5.8113623e+00  -1.8977332e+01
   2.1865716e+01  -2.5705211e+01   1.5000000e+02   4.6576733e+00  -4.8876416e+00  -1.9852479e+01
   2.1983447e+01  -2.5779810e+01   1.5000000e+02   3.3578428e+00  -3.9388023e+00  -2.0489384e+01
   2.2111897e+01  -2.5838451e+01   1.5000000e+02   2.1118585e+00  -3.0017122e+00  -2.0935460e+01
   2.2248414e+01  -2.5879917e+01   1.5000000e+02   9.6974265e-01  -2.0727729e+00  -2.1258355e+01
   2.2390166e+01  -2.5903346e+01   1.5000000e+02  -4.0060559e-02  -1.1176462e+00  -2.1503414e+01
   2.2534204e+01  -2.5908248e+01   1.5000000e+02  -9.0383436e-01  -1.0094069e-01  -2.1671489e+01
   2.2677529e+01  -2.5894523e+01   1.5000000e+02  -1.6166281e+00   9.8285739e-01  -2.1727616e+01
   2.3395327e+01  -2.5648315e+01   1.5000000e+02  -4.4611844e+00   6.9217165e+00  -1.8958270e+01
   2.3476438e+01  -2.5543687e+01   1.5000000e+02  -4.4778846e+00   6.9330588e+00  -1.8664569e+01
   2.3542550e+01  -2.5430832e+01   1.5000000e+02  -4.3630541e+00   6.6370777e+00  -1.8664428e+01
   2.3592694e+01  -2.5311479e+01   1.5000000e+02  -4.0252114e+00   6.0495326e+00  -1.8970682e+01
   2.3626151e+01  -2.5187454e+01   1.5000000e+02  -3.3695760e+00   5.1964289e+00  -1.9511741e+01
   2.3642464e+01  -2.5060648e+01   1.5000000e+02  -2.3386193e+00   4.1093332e+00  -2.0136531e+01
   2.3641438e+01  -2.4932989e+01   1.5000000e+02  -9.4563302e-01   2.8236763e+00  -2.0652349e+01
   2.3623142e+01  -2.4806410e+01   1.5000000e+02   7.1964162e-01   1.3805457e+00  -2.0881266e+01
   2.3587905e+01  -2.4682823e+01   1.5000000e+02   2.5174175e+00  -1.7086786e-01  -2.0707928e+01
   2.3536306e+01  -2.4564089e+01   1.5000000e+02   4.3006935e+00  -1.7735534e+00  -2.0098486e+01
   2.3469165e+01  -2.4451993e+01   1.5000000e+02   5.9521105e+00  -3.3664142e+00  -1.9089623e+01
   2.3387527e+01  -2.4348212e+01   1.5000000e+02   7.4017984e+00  -4.8901158e+00  -1.7761674e+01
   2.3292645e+01  -2.4254297e+01   1.5000000e+02   8.6263784e+00  -6.2924806e+00  -1.6212075e+01
   2.3185961e+01  -2.4171648e+01   1.5000000e+02   9.6373065e+00  -7.5320616e+00  -1.4537880e+01
   2.3069082e+01  -2.4101496e+01   1.5000000e+02   1.0466258e+01  -8.5799288e+00  -1.2828456e+01
   2.2943759e+01  -2.4044881e+01   1.5000000e+02   1.1152435e+01  -9.4211640e+00  -1.1164719e+01
   2.2811860e+01  -2.4002644e+01   1.5000000e+02   1.1734005e+01  -1.0056884e+01  -9.6197036e+00
   2.2675344e+01  -2.3975411e+01   1.5000000e+02   1.2243827e+01  -1.0505103e+01  -8.2559223e+00
   2.2536233e+01  -2.3963584e+01   1.5000000e+02   1.2707754e+01  -1.0796875e+01  -7.1195220e+00
   2.2396586e+01  -2.3967339e+01   1.5000000e+02   1.3143263e+01  -1.0966341e+01  -6.2359881e+00
   2.2258470e+01  -2.3986621e+01   1.5000000e+02   1.3556989e+01  -1.1038835e+01  -5.6126956e+00
   2.2123927e+01  -2.4021143e+01   1.5000000e+02   1.3941435e+01  -1.1024877e+01  -5.2484315e+00
   2.1994955e+01  -2.4070395e+01   1.5000000e+02   1.4272856e+01  -1.0924949e+01  -5.1428566e+00
   2.1873472e+01  -2.4133646e+01   1.5000000e+02   1.4513230e+01  -1.0741634e+01  -5.2970256e+00
   2.1761292e+01  -2.4209958e+01   1.5000000e+02   1.4617804e+01  -1.0489549e+01  -5.7041589e+00
   2.1660100e+01  -2.4298196e+01   1.5000000e+02   1.4547151e+01  -1.0196274e+01  -6.3380791e+00
   2.1571427e+01  -2.4397046e+01   1.5000000e+02   1.4280140e+01  -9.8951035e+00  -7.1491655e+00
   2.1496626e+01  -2.4505033e+01   1.5000000e+02   1.3823488e+01  -9.6154520e+00  -8.0722117e+00
   2.1436852e+01  -2.4620542e+01   1.5000000e+02   1.3213869e+01  -9.3757560e+00  -9.0440736e+00
   2.1393044e+01  -2.4741841e+01   1.5000000e+02   1.2509636e+01  -9.1804710e+00  -1.0024125e+01
   2.1365907e+01  -2.4867105e+01   1.5000000e+02   1.1772475e+01  -9.0201541e+00  -1.1007833e+01
   2.1355902e+01  -2.4994445e+01   1.5000000e+02   1.1044865e+01  -8.8724749e+00  -1.2024918e+01
   2.1363232e+01  -2.5121935e+01   1.5000000e+02   1.0333512e+01  -8.7028841e+00  -1.3120038e+01
   2.1387842e+01  -2.5247641e+01   1.5000000e+02   9.6073234e+00  -8.4663120e+00  -1.4323394e+01
   2.1429408e+01  -2.5369649e+01   1.5000000e+02   8.8117479e+00  -8.1134323e+00  -1.5624562e+01
   2.1487346e+01  -2.5486095e+01   1.5000000e+02   7.8934194e+00  -7.6033537e+00  -1.6962538e+01
   2.1560817e+01  -2.5595198e+01   1.5000000e+02   6.8244986e+00  -6.9195278e+00  -1.8238232e+01
   2.1648732e+01  -2.5695281e+01   1.5000000e+02   5.6164602e+00  -6.0806560e+00  -1.9345914e+01
   2.1749773e+01  -2.5784802e+01   1.5000000e+02   4.3175312e+00  -5.1378491e+00  -2.0210986e+01
   2.1862409e+01  -2.5862380e+01   1.5000000e+02   2.9959259e+00  -4.1558085e+00  -2.0816125e+01
   2.1984918e+01  -2.5926814e+01   1.5000000e+02   1.7179893e+00  -3.1856730e+00  -2.1202058e+01
   2.2115417e+01  -2.5977106e+01   1.5000000e+02   5.3235905e-01  -2.2439902e+00  -2.1442200e+01
   2.2251889e+01  -2.6012474e+01   1.5000000e+02  -5.3338686e-01  -1.3099703e+00  -2.1604921e+01
   2.2392219e+01  -2.6032368e+01   1.5000000e+02  -1.4662414e+00  -3.4216726e-01  -2.1723358e+01
   2.2534225e+01  -2.6036480e+01   1.5000000e+02  -2.2593018e+00   6.9496591e-01  -2.1786292e+01
   2.2675699e+01  -2.6024745e+01   1.5000000e+02  -2.9082430e+00   1.8082622e+00  -2.1751104e+01
   2.2814440e+01  -2.5997346e+01   1.5000000e+02  -3.4140839e+00   2.9662133e+00  -2.1569776e+01
   2.2948295e+01  -2.5954709e+01   1.5000000e+02  -3.7881881e+00   4.1043237e+00  -2.1215822e+01
   2.3075191e+01  -2.5897496e+01   1.5000000e+02  -4.0537823e+00   5.1407619e+00  -2.0702699e+01
   2.3193172e+01  -2.5826595e+01   1.5000000e+02  -4.2407046e+00   5.9950552e+00  -2.0088845e+01
   2.3300428e+01  -2.5743104e+01   1.5000000e+02  -4.3741792e+00   6.6026519e+00  -1.9469401e+01
   2.3766996e+01  -2.5206421e+01   1.5000000e+02  -4.6944925e+00   6.5990636e+00  -1.8189480e+01
   2.3783719e+01  -2.5078890e+01   1.5000000e+02  -3.7442487e+00   5.5818074e+00  -1.9056908e+01
   2.3784834e+01  -2.4950467e+01   1.5000000e+02  -2.4120802e+00   4.3856287e+00  -1.9854991e+01
   2.3770378e+01  -2.4822711e+01   1.5000000e+02  -7.7301821e-01   3.0292584e+00  -2.0397564e+01
   2.3740574e+01  -2.4697168e+01   1.5000000e+02   1.0427428e+00   1.5414060e+00  -2.0553798e+01
   2.3695825e+01  -2.4575353e+01   1.5000000e+02   2.8888565e+00  -3.6968416e-02  -2.0269228e+01
   2.3636712e+01  -2.4458730e+01   1.5000000e+02   4.6395084e+00  -1.6550779e+00  -1.9559362e+01
   2.3563983e+01  -2.4348698e+01   1.5000000e+02   6.2101891e+00  -3.2580062e+00  -1.8486515e+01
   2.3478542e+01  -2.4246574e+01   1.5000000e+02   7.5609322e+00  -4.7931301e+00  -1.7134249e+01
   2.3381437e+01  -2.4153577e+01   1.5000000e+02   8.6884067e+00  -6.2149407e+00  -1.5588682e+01
   2.3273847e+01  -2.4070813e+01   1.5000000e+02   9.6140546e+00  -7.4871784e+00  -1.3929012e+01
   2.3157070e+01  -2.3999268e+01   1.5000000e+02   1.0372511e+01  -8.5830146e+00  -1.2225780e+01
   2.3032504e+01  -2.3939789e+01   1.5000000e+02   1.1002409e+01  -9.4856130e+00  -1.0543484e+01
   2.2901635e+01  -2.3893081e+01   1.5000000e+02   1.1540393e+01  -1.0190406e+01  -8.9437747e+00
   2.2766016e+01  -2.3859698e+01   1.5000000e+02   1.2018517e+01  -1.0708200e+01  -7.4847050e+00
   2.2627254e+01  -2.3840034e+01   1.5000000e+02   1.2463655e+01  -1.1065222e+01  -6.2149216e+00
   2.2486990e+01  -2.3834322e+01   1.5000000e+02   1.2897183e+01  -1.1296759e+01  -5.1661800e+00
   2.2346878e+01  -2.3842629e+01   1.5000000e+02   1.3333515e+01  -1.1435106e+01  -4.3504529e+00
   2.2208576e+01  -2.3864856e+01   1.5000000e+02   1.3777146e+01  -1.1497941e+01  -3.7660478e+00
   2.2073717e+01  -2.3900742e+01   1.5000000e+02   1.4219103e+01  -1.1485086e+01  -3.4099167e+00
   2.1943900e+01  -2.3949862e+01   1.5000000e+02   1.4634531e+01  -1.1386799e+01  -3.2874702e+00
   2.1820668e+01  -2.4011634e+01   1.5000000e+02   1.4983787e+01  -1.1198315e+01  -3.4116538e+00
   2.1705490e+01  -2.4085325e+01   1.5000000e+02   1.5218315e+01  -1.0930668e+01  -3.7910694e+00
   2.1599747e+01  -2.4170063e+01   1.5000000e+02   1.5290514e+01  -1.0611380e+01  -4.4153524e+00
   2.1504717e+01  -2.4264838e+01   1.5000000e+02   1.5165103e+01  -1.0276615e+01  -5.2469534e+00
   2.1421556e+01  -2.4368522e+01   1.5000000e+02   1.4829052e+01  -9.9608419e+00  -6.2240258e+00
   2.1351286e+01  -2.4479876e+01   1.5000000e+02   1.4297807e+01  -9.6891161e+00  -7.2729970e+00
   2.1294783e+01  -2.4597569e+01   1.5000000e+02   1.3615201e+01  -9.4736680e+00  -8.3273756e+00
   2.1252763e+01  -2.4720187e+01   1.5000000e+02   1.2844819e+01  -9.3143690e+00  -9.3468903e+00
   2.1225776e+01  -2.4846255e+01   1.5000000e+02   1.2052908e+01  -9.2012186e+00  -1.0329788e+01
   2.1214194e+01  -2.4974252e+01   1.5000000e+02   1.1287930e+01  -9.1162079e+00  -1.1311438e+01
   2.1218203e+01  -2.5102628e+01   1.5000000e+02   1.0564730e+01  -9.0326326e+00  -1.2347923e+01
   2.1237805e+01  -2.5229823e+01   1.5000000e+02   9.8601601e+00  -8.9128883e+00  -1.3489907e+01
   2.1272810e+01  -2.5354289e+01   1.5000000e+02   9.1221867e+00  -8.7088240e+00  -1.4756301e+01
   2.1322835e+01  -2.5474505e+01   1.5000000e+02   8.2892885e+00  -8.3687218e+00  -1.6117527e+01
   2.1387313e+01  -2.5588997e+01   1.5000000e+02   7.3133282e+00  -7.8512440e+00  -1.7495404e+01
   2.1465492e+01  -2.5696358e+01   1.5000000e+02   6.1779725e+00  -7.1415526e+00  -1.8781301e+01
   2.1556443e+01  -2.5795263e+01   1.5000000e+02   4.9060284e+00  -6.2613331e+00  -1.9867851e+01
   2.1659074e+01  -2.5884489e+01   1.5000000e+02   3.5527976e+00  -5.2654685e+00  -2.0683245e+01
   2.1772138e+01  -2.5962932e+01   1.5000000e+02   2.1883922e+00  -4.2240386e+00  -2.1213849e+01
   2.1894251e+01  -2.6029616e+01   1.5000000e+02   8.7711445e-01  -3.1963758e+00  -2.1504425e+01
   2.2023907e+01  -2.6083711e+01   1.5000000e+02  -3.3668572e-01  -2.2095433e+00  -2.1635329e+01
   2.2159501e+01  -2.6124543e+01   1.5000000e+02  -1.4306971e+00  -1.2519561e+00  -2.1687560e+01
   2.2299346e+01  -2.6151603e+01   1.5000000e+02  -2.3967443e+00  -2.8469188e-01  -2.1712050e+01
   2.2441699e+01  -2.6164552e+01   1.5000000e+02  -3.2302909e+00   7.3608119e-01  -2.1715430e+01
   2.2584779e+01  -2.6163228e+01   1.5000000e+02  -3.9245217e+00   1.8362544e+00  -2.1665137e+01
   2.2726800e+01  -2.6147648e+01   1.5000000e+02  -4.4718917e+00   3.0097153e+00  -2.1508362e+01
   2.2865988e+01  -2.6118006e+01   1.5000000e+02  -4.8709432e+00   4.2165519e+00  -2.1195742e+01
   2.3000608e+01  -2.6074673e+01   1.5000000e+02  -5.1335869e+00   5.3919262e+00  -2.0701855e+01
   2.3128985e+01  -2.6018190e+01   1.5000000e+02  -5.2876694e+00   6.4607615e+00  -2.0038044e+01
   2.3249532e+01  -2.5949261e+01   1.5000000e+02  -5.3725967e+00   7.3533253e+00  -1.9255745e+01
   2.3360764e+01  -2.5868743e+01   1.5000000e+02  -5.4290951e+00   8.0168325e+00  -1.8440737e+01
   2.3461321e+01  -2.5777637e+01   1.5000000e+02  -5.4864104e+00   8.4203244e+00  -1.7700812e+01
   2.3549984e+01  -2.5677070e+01   1.5000000e+02  -5.5492689e+00   8.5530716e+00  -1.7150262e+01
   2.3625690e+01  -2.5568286e+01   1.5000000e+02  -5.5865865e+00   8.4199756e+00  -1.6891240e+01
   2.3687542e+01  -2.5452625e+01   1.5000000e+02  -5.5263538e+00   8.0363917e+00  -1.6989827e+01
   2.3734822e+01  -2.5331509e+01   1.5000000e+02  -5.2648036e+00   7.4227537e+00  -1.7448840e+01
   2.3875586e+01  -2.4659982e+01   1.5000000e+02   3.8125262e-01   2.5582726e+00  -2.0106300e+01
   2.3830879e+01  -2.4537575e+01   1.5000000e+02   2.2377305e+00   1.0128312e+00  -1.9950158e+01
   2.3773097e+01  -2.4419804e+01   1.5000000e+02   3.9939139e+00  -5.9662481e-01  -1.9376768e+01
   2.3702841e+01  -2.4307823e+01   1.5000000e+02   5.5727537e+00  -2.2185490e+00  -1.8444832e+01
   2.3620832e+01  -2.4202727e+01   1.5000000e+02   6.9367793e+00  -3.8020171e+00  -1.7229033e+01
   2.3527895e+01  -2.4105543e+01   1.5000000e+02   8.0805264e+00  -5.3022717e+00  -1.5804605e+01
   2.3424960e+01  -2.4017218e+01   1.5000000e+02   9.0208321e+00  -6.6830737e+00  -1.4239393e+01
   2.3313046e+01  -2.3938609e+01   1.5000000e+02   9.7878561e+00  -7.9162705e+00  -1.2591825e+01
   2.3193253e+01  -2.3870480e+01   1.5000000e+02   1.0417365e+01  -8.9802894e+00  -1.0913507e+01
   2.3066752e+01  -2.3813490e+01   1.5000000e+02   1.0945052e+01  -9.8604336e+00  -9.2540879e+00
   2.2934774e+01  -2.3768190e+01   1.5000000e+02   1.1403465e+01  -1.0552080e+01  -7.6649816e+00
   2.2798599e+01  -2.3735020e+01   1.5000000e+02   1.1821307e+01  -1.1065033e+01  -6.1982294e+00
   2.2659544e+01  -2.3714297e+01   1.5000000e+02   1.2223779e+01  -1.1424944e+01  -4.8995685e+00
   2.2518950e+01  -2.3706224e+01   1.5000000e+02   1.2632544e+01  -1.1668012e+01  -3.7996143e+00
   2.2378173e+01  -2.3710877e+01   1.5000000e+02   1.3064386e+01  -1.1829198e+01  -2.9090058e+00
   2.2238571e+01  -2.3728212e+01   1.5000000e+02   1.3528551e+01  -1.1928991e+01  -2.2229293e+00
   2.2101491e+01  -2.3758062e+01   1.5000000e+02   1.4023245e+01  -1.1966797e+01  -1.7338748e+00
   2.1968257e+01  -2.3800137e+01   1.5000000e+02   1.4532378e+01  -1.1926188e+01  -1.4452362e+00
   2.1840160e+01  -2.3854033e+01   1.5000000e+02   1.5024229e+01  -1.1789691e+01  -1.3761848e+00
   2.1718445e+01  -2.3919227e+01   1.5000000e+02   1.5453687e+01  -1.1554137e+01  -1.5532457e+00
   2.1604300e+01  -2.3995088e+01   1.5000000e+02   1.5768605e+01  -1.1237271e+01  -1.9938627e+00
   2.1498847e+01  -2.4080881e+01   1.5000000e+02   1.5918860e+01  -1.0873383e+01  -2.6915006e+00
   2.1403126e+01  -2.4175771e+01   1.5000000e+02   1.5865850e+01  -1.0502698e+01  -3.6094755e+00
   2.1318092e+01  -2.4278837e+01   1.5000000e+02   1.5590587e+01  -1.0161006e+01  -4.6848355e+00
   2.1244599e+01  -2.4389071e+01   1.5000000e+02   1.5099654e+01  -9.8731060e+00  -5.8394397e+00
   2.1183398e+01  -2.4505397e+01   1.5000000e+02   1.4427277e+01  -9.6504550e+00  -6.9963042e+00
   2.1135123e+01  -2.4626673e+01   1.5000000e+02   1.3631257e+01  -9.4925661e+00  -8.0975946e+00
   2.1100284e+01  -2.4751708e+01   1.5000000e+02   1.2781085e+01  -9.3909816e+00  -9.1196795e+00
   2.1079268e+01  -2.4879269e+01   1.5000000e+02   1.1940616e+01  -9.3334554e+00  -1.0078927e+01
   2.1072323e+01  -2.5008094e+01   1.5000000e+02   1.1150861e+01  -9.3052132e+00  -1.1024954e+01
   2.1079564e+01  -2.5136907e+01   1.5000000e+02   1.0419058e+01  -9.2858566e+00  -1.2022870e+01
   2.1100962e+01  -2.5264425e+01   1.5000000e+02   9.7177505e+00  -9.2440620e+00  -1.3129756e+01
   2.1136349e+01  -2.5389375e+01   1.5000000e+02   8.9938077e+00  -9.1348538e+00  -1.4372392e+01
   2.1185413e+01  -2.5510507e+01   1.5000000e+02   8.1848387e+00  -8.9039010e+00  -1.5732259e+01
   2.1247702e+01  -2.5626604e+01   1.5000000e+02   7.2386266e+00  -8.4997423e+00  -1.7142793e+01
   2.1322627e+01  -2.5736496e+01   1.5000000e+02   6.1301171e+00  -7.8903294e+00  -1.8501342e+01
   2.1409465e+01  -2.5839073e+01   1.5000000e+02   4.8705971e+00  -7.0770015e+00  -1.9694203e+01
   2.1507366e+01  -2.5933295e+01   1.5000000e+02   3.5056219e+00  -6.0986463e+00  -2.0628081e+01
   2.1615363e+01  -2.6018206e+01   1.5000000e+02   2.1018731e+00  -5.0220329e+00  -2.1257390e+01
   2.1732377e+01  -2.6092940e+01   1.5000000e+02   7.2790560e-01  -3.9205806e+00  -2.1596279e+01
   2.1857230e+01  -2.6156734e+01   1.5000000e+02  -5.6334430e-01  -2.8499145e+00  -2.1709701e+01
   2.1988659e+01  -2.6208937e+01   1.5000000e+02  -1.7426963e+00  -1.8311282e+00  -2.1686974e+01
   2.2125326e+01  -2.6249014e+01   1.5000000e+02  -2.8011898e+00  -8.4885383e-01  -2.1609582e+01
   2.2265835e+01  -2.6276554e+01   1.5000000e+02  -3.7391646e+00   1.3632439e-01  -2.1526316e+01
   2.2408747e+01  -2.6291274e+01   1.5000000e+02  -4.5551276e+00   1.1675725e+00  -2.1443538e+01
   2.2552596e+01  -2.6293022e+01   1.5000000e+02  -5.2403452e+00   2.2722815e+00  -2.1330955e+01
   2.2695905e+01  -2.6281782e+01   1.5000000e+02  -5.7810834e+00   3.4500809e+00  -2.1137731e+01
   2.2837204e+01  -2.6257668e+01   1.5000000e+02  -6.1663698e+00   4.6709065e+00  -2.0811811e+01
   2.2975043e+01  -2.6220927e+01   1.5000000e+02  -6.3971996e+00   5.8814804e+00  -2.0316639e+01
   2.3108015e+01  -2.6171938e+01   1.5000000e+02  -6.4925626e+00   7.0165796e+00  -1.9642617e+01
   2.3234764e+01  -2.6111201e+01   1.5000000e+02  -6.4892159e+00   8.0115127e+00  -1.8812893e+01
   2.3354006e+01  -2.6039339e+01   1.5000000e+02  -6.4353838e+00   8.8135189e+00  -1.7882988e+01
   2.3464538e+01  -2.5957085e+01   1.5000000e+02  -6.3803319e+00   9.3889115e+00  -1.6934940e+01
   2.3565255e+01  -2.5865276e+01   1.5000000e+02  -6.3629097e+00   9.7244472e+00  -1.6067980e+01
   2.3655157e+01  -2.5764847e+01   1.5000000e+02  -6.4001270e+00   9.8237479e+00  -1.5388428e+01
   2.3733362e+01  -2.5656816e+01   1.5000000e+02  -6.4760615e+00   9.7018918e+00  -1.4997823e+01
   2.3799113e+01  -2.5542275e+01   1.5000000e+02  -6.5337709e+00   9.3800497e+00  -1.4975553e+01
   2.3851784e+01  -2.5422380e+01   1.5000000e+02  -6.4769068e+00   8.8799031e+00  -1.5355020e+01
   2.3890885e+01  -2.5298334e+01   1.5000000e+02  -6.1877614e+00   8.2176650e+00  -1.6100829e+01
   2.3916068e+01  -2.5171383e+01   1.5000000e+02  -5.5609655e+00   7.4000684e+00  -1.7100398e+01
   2.3927125e+01  -2.5042792e+01   1.5000000e+02  -4.5406736e+00   6.4251823e+00  -1.8180438e+01
   2.3923990e+01  -2.4913844e+01   1.5000000e+02  -3.1441076e+00   5.2890262e+00  -1.9145553e+01
   2.3906739e+01  -2.4785818e+01   1.5000000e+02  -1.4593025e+00   3.9944874e+00  -1.9824697e+01
   2.3728573e+01  -2.4121189e+01   1.5000000e+02   6.7313309e+00  -3.3825978e+00  -1.6689629e+01
   2.3635549e+01  -2.4023575e+01   1.5000000e+02   7.8020699e+00  -4.9015846e+00  -1.5343766e+01
   2.3533333e+01  -2.3934023e+01   1.5000000e+02   8.6802710e+00  -6.3157138e+00  -1.3861323e+01
   2.3422770e+01  -2.3853255e+01   1.5000000e+02   9.3934536e+00  -7.6003241e+00  -1.2288309e+01
   2.3304766e+01  -2.3781924e+01   1.5000000e+02   9.9740293e+00  -8.7354093e+00  -1.0663805e+01
   2.3180283e+01  -2.3720604e+01   1.5000000e+02   1.0454664e+01  -9.7042300e+00  -9.0250773e+00
   2.3050332e+01  -2.3669791e+01   1.5000000e+02   1.0865628e+01  -1.0495452e+01  -7.4130898e+00
   2.2915960e+01  -2.3629891e+01   1.5000000e+02   1.1234305e+01  -1.1108344e+01  -5.8742040e+00
   2.2778251e+01  -2.3601225e+01   1.5000000e+02   1.1585843e+01  -1.1557526e+01  -4.4561596e+00
   2.2638311e+01  -2.3584025e+01   1.5000000e+02   1.1943674e+01  -1.1873211e+01  -3.1988967e+00
   2.2497262e+01  -2.3578427e+01   1.5000000e+02   1.2328901e+01  -1.2094120e+01  -2.1252067e+00
   2.2356235e+01  -2.3584476e+01   1.5000000e+02   1.2758509e+01  -1.2254382e+01  -1.2374786e+00
   2.2216360e+01  -2.3602125e+01   1.5000000e+02   1.3242616e+01  -1.2370233e+01  -5.2423333e-01
   2.2078760e+01  -2.3631230e+01   1.5000000e+02   1.3781205e+01  -1.2434214e+01   2.5282786e-02
   2.1944540e+01  -2.3671560e+01   1.5000000e+02   1.4361039e+01  -1.2421523e+01   4.0612938e-01
   2.1814781e+01  -2.3722789e+01   1.5000000e+02   1.4953789e+01  -1.2306168e+01   5.9221327e-01
   2.1690531e+01  -2.3784506e+01   1.5000000e+02   1.5517019e+01  -1.2077854e+01   5.4439750e-01
   2.1572798e+01  -2.3856215e+01   1.5000000e+02   1.5998792e+01  -1.1750247e+01   2.2814253e-01
   2.1462542e+01  -2.3937336e+01   1.5000000e+02   1.6345124e+01  -1.1357457e+01  -3.6923705e-01
   2.1360668e+01  -2.4027215e+01   1.5000000e+02   1.6508149e+01  -1.0943014e+01  -1.2296319e+00
   2.1268016e+01  -2.4125126e+01   1.5000000e+02   1.6453284e+01  -1.0548389e+01  -2.3046388e+00
   2.1185358e+01  -2.4230273e+01   1.5000000e+02   1.6165108e+01  -1.0205217e+01  -3.5227775e+00
   2.1113392e+01  -2.4341804e+01   1.5000000e+02   1.5651945e+01  -9.9316141e+00  -4.8009490e+00
   2.1052731e+01  -2.4458811e+01   1.5000000e+02   1.4947863e+01  -9.7318619e+00  -6.0588200e+00
   2.1003903e+01  -2.4580337e+01   1.5000000e+02   1.4109321e+01  -9.5991745e+00  -7.2349046e+00
   2.0967340e+01  -2.4705388e+01   1.5000000e+02   1.3205055e+01  -9.5211410e+00  -8.3000734e+00
   2.0943381e+01  -2.4832937e+01   1.5000000e+02   1.2301233e+01  -9.4856437e+00  -9.2634233e+00
   2.0932261e+01  -2.4961935e+01   1.5000000e+02   1.1446457e+01  -9.4836936e+00  -1.0168052e+01
   2.0934113e+01  -2.5091316e+01   1.5000000e+02   1.0661382e+01  -9.5067942e+00  -1.1078031e+01
   2.0948962e+01  -2.5220008e+01   1.5000000e+02   9.9353317e+00  -9.5397982e+00  -1.2060401e+01
   2.0976725e+01  -2.5346941e+01   1.5000000e+02   9.2301090e+00  -9.5534411e+00  -1.3166215e+01
   2.1017212e+01  -2.5471057e+01   1.5000000e+02   8.4898668e+00  -9.5016643e+00  -1.4414106e+01
   2.1070124e+01  -2.5591318e+01   1.5000000e+02   7.6553684e+00  -9.3269536e+00  -1.5779767e+01
   2.1135052e+01  -2.5706714e+01   1.5000000e+02   6.6799888e+00  -8.9733334e+00  -1.7194958e+01
   2.1211486e+01  -2.5816275e+01   1.5000000e+02   5.5434795e+00  -8.4030212e+00  -1.8558465e+01
   2.1298812e+01  -2.5919076e+01   1.5000000e+02   4.2593244e+00  -7.6106759e+00  -1.9757917e+01
   2.1396318e+01  -2.6014246e+01   1.5000000e+02   2.8726835e+00  -6.6289108e+00  -2.0697769e+01
   2.1503202e+01  -2.6100978e+01   1.5000000e+02   1.4487323e+00  -5.5213070e+00  -2.1324916e+01
   2.1618575e+01  -2.6178534e+01   1.5000000e+02   5.4958217e-02  -4.3641613e+00  -2.1642430e+01
   2.1741470e+01  -2.6246251e+01   1.5000000e+02  -1.2559489e+00  -3.2234981e+00  -2.1705389e+01
   2.1870849e+01  -2.6303553e+01   1.5000000e+02  -2.4555374e+00  -2.1366733e+00  -2.1600101e+01
   2.2005615e+01  -2.6349947e+01   1.5000000e+02  -3.5377887e+00  -1.1056969e+00  -2.1415527e+01
   2.2144619e+01  -2.6385037e+01   1.5000000e+02  -4.5089436e+00  -1.0359071e-01  -2.1218098e+01
   2.2286673e+01  -2.6408521e+01   1.5000000e+02  -5.3748323e+00   9.1018989e-01  -2.1037766e+01
   2.2430558e+01  -2.6420198e+01   1.5000000e+02  -6.1320964e+00   1.9718927e+00  -2.0867237e+01
   2.2575040e+01  -2.6419967e+01   1.5000000e+02  -6.7663387e+00   3.0993627e+00  -2.0671623e+01
   2.2718877e+01  -2.6407830e+01   1.5000000e+02  -7.2571110e+00   4.2854401e+00  -2.0403226e+01
   2.2860835e+01  -2.6383891e+01   1.5000000e+02  -7.5870858e+00   5.4992977e+00  -2.0016127e+01
   2.2999697e+01  -2.6348357e+01   1.5000000e+02  -7.7515729e+00   6.6930532e+00  -1.9477339e+01
   2.3134275e+01  -2.6301531e+01   1.5000000e+02  -7.7646887e+00   7.8105400e+00  -1.8774219e+01
   2.3263423e+01  -2.6243816e+01   1.5000000e+02  -7.6601692e+00   8.7965620e+00  -1.7918737e+01
   2.3386045e+01  -2.6175706e+01   1.5000000e+02  -7.4864924e+00   9.6055829e+00  -1.6948650e+01
   2.3501106e+01  -2.6097781e+01   1.5000000e+02  -7.2983773e+00   1.0208338e+01  -1.5924722e+01
   2.3607643e+01  -2.6010708e+01   1.5000000e+02  -7.1472014e+00   1.0594222e+01  -1.4924910e+01
   2.3704769e+01  -2.5915227e+01   1.5000000e+02  -7.0716265e+00   1.0768990e+01  -1.4038201e+01
   2.3791685e+01  -2.5812147e+01   1.5000000e+02  -7.0882611e+00   1.0750021e+01  -1.3358834e+01
   2.3867684e+01  -2.5702342e+01   1.5000000e+02  -7.1817969e+00   1.0561313e+01  -1.2978488e+01
   2.3932155e+01  -2.5586739e+01   1.5000000e+02  -7.2972204e+00   1.0228636e+01  -1.2972120e+01
   2.3984591e+01  -2.5466309e+01   1.5000000e+02  -7.3403479e+00   9.7739391e+00  -1.3376822e+01
   2.4024590e+01  -2.5342065e+01   1.5000000e+02  -7.1926265e+00   9.2092740e+00  -1.4170308e+01
   2.4051855e+01  -2.5215044e+01   1.5000000e+02  -6.7401521e+00   8.5327714e+00  -1.5260375e+01
   2.4066201e+01  -2.5086305e+01   1.5000000e+02  -5.9082041e+00   7.7299793e+00  -1.6494049e+01
   2.4067549e+01  -2.4956919e+01   1.5000000e+02  -4.6870028e+00   6.7809039e+00  -1.7687256e+01
   2.4055928e+01  -2.4827958e+01   1.5000000e+02  -3.1369950e+00   5.6700933e+00  -1.8665113e+01
   2.4031475e+01  -2.4700486e+01   1.5000000e+02  -1.3712026e+00   4.3955525e+00  -1.9297684e+01
   2.3994430e+01  -2.4575552e+01   1.5000000e+02   4.7678187e-01   2.9733134e+00  -1.9518341e+01
   2.3945134e+01  -2.4454183e+01   1.5000000e+02   2.2845856e+00   1.4367721e+00  -1.9321010e+01
   2.3884024e+01  -2.4337372e+01   1.5000000e+02   3.9610094e+00  -1.6831503e-01  -1.8742885e+01
   2.3811632e+01  -2.4226071e+01   1.5000000e+02   5.4510792e+00  -1.7910313e+00  -1.7843686e+01
   2.3375689e+01  -2.3671439e+01   1.5000000e+02   9.6100670e+00  -8.8052314e+00  -9.8965382e+00
   2.3252789e+01  -2.3610399e+01   1.5000000e+02   1.0011347e+01  -9.7822148e+00  -8.3281686e+00
   2.3124911e+01  -2.3558757e+01   1.5000000e+02   1.0350739e+01  -1.0598407e+01  -6.7613583e+00
   2.2992907e+01  -2.3516857e+01   1.5000000e+02   1.0652027e+01  -1.1248122e+01  -5.2348988e+00
   2.2857652e+01  -2.3484975e+01   1.5000000e+02   1.0938050e+01  -1.1738858e+01  -3.7925747e+00
   2.2720038e+01  -2.3463321e+01   1.5000000e+02   1.1231353e+01  -1.2093970e+01  -2.4753055e+00
   2.2580974e+01  -2.3452037e+01   1.5000000e+02   1.1553784e+01  -1.2349243e+01  -1.3113178e+00
   2.2441376e+01  -2.3451200e+01   1.5000000e+02   1.1925094e+01  -1.2542881e+01  -3.0938830e-01
   2.2302165e+01  -2.3460813e+01   1.5000000e+02   1.2360754e+01  -1.2702010e+01   5.4017458e-01
   2.2164258e+01  -2.3480814e+01   1.5000000e+02   1.2869548e+01  -1.2831749e+01   1.2551350e+00
   2.2028563e+01  -2.3511070e+01   1.5000000e+02   1.3450899e+01  -1.2913246e+01   1.8455068e+00
   2.1895979e+01  -2.3551382e+01   1.5000000e+02   1.4092264e+01  -1.2913132e+01   2.2999968e+00
   2.1767383e+01  -2.3601484e+01   1.5000000e+02   1.4767376e+01  -1.2800653e+01   2.5830284e+00
   2.1643629e+01  -2.3661045e+01   1.5000000e+02   1.5436661e+01  -1.2563788e+01   2.6447425e+00
   2.1525543e+01  -2.3729670e+01   1.5000000e+02   1.6050777e+01  -1.2216292e+01   2.4391910e+00
   2.1413916e+01  -2.3806904e+01   1.5000000e+02   1.6556777e+01  -1.1793395e+01   1.9414381e+00
   2.1309500e+01  -2.3892235e+01   1.5000000e+02   1.6904927e+01  -1.1340546e+01   1.1565626e+00
   2.1213003e+01  -2.3985096e+01   1.5000000e+02   1.7054477e+01  -1.0901912e+01   1.1966347e-01
   2.1125086e+01  -2.4084868e+01   1.5000000e+02   1.6978138e+01  -1.0512707e+01  -1.1097337e+00
   2.1046355e+01  -2.4190885e+01   1.5000000e+02   1.6666138e+01  -1.0195527e+01  -2.4556126e+00
   2.0977359e+01  -2.4302438e+01   1.5000000e+02   1.6129892e+01  -9.9591780e+00  -3.8352045e+00
   2.0918587e+01  -2.4418778e+01   1.5000000e+02   1.5403492e+01  -9.7994589e+00  -5.1711115e+00
   2.0870461e+01  -2.4539125e+01   1.5000000e+02   1.4540378e+01  -9.7025922e+00  -6.4046437e+00
   2.0833338e+01  -2.4662665e+01   1.5000000e+02   1.3604502e+01  -9.6514274e+00  -7.5063814e+00
   2.0807500e+01  -2.4788566e+01   1.5000000e+02   1.2658037e+01  -9.6323554e+00  -8.4803809e+00
   2.0793157e+01  -2.4915972e+01   1.5000000e+02   1.1749871e+01  -9.6394529e+00  -9.3605030e+00
   2.0790442e+01  -2.5044017e+01   1.5000000e+02   1.0907720e+01  -9.6731239e+00  -1.0201164e+01
   2.0799410e+01  -2.5171828e+01   1.5000000e+02   1.0135033e+01  -9.7332916e+00  -1.1065267e+01
   2.0820036e+01  -2.5298531e+01   1.5000000e+02   9.4119232e+00  -9.8101206e+00  -1.2011497e+01
   2.0852214e+01  -2.5423255e+01   1.5000000e+02   8.6994149e+00  -9.8766977e+00  -1.3081714e+01
   2.0895760e+01  -2.5545142e+01   1.5000000e+02   7.9469073e+00  -9.8874897e+00  -1.4289481e+01
   2.0950406e+01  -2.5663350e+01   1.5000000e+02   7.1027855e+00  -9.7842566e+00  -1.5611872e+01
   2.1015807e+01  -2.5777060e+01   1.5000000e+02   6.1267128e+00  -9.5083604e+00  -1.6988103e+01
   2.1091539e+01  -2.5885481e+01   1.5000000e+02   5.0006833e+00  -9.0161549e+00  -1.8327242e+01
   2.1177102e+01  -2.5987858e+01   1.5000000e+02   3.7354665e+00  -8.2926395e+00  -1.9525042e+01
   2.1271924e+01  -2.6083476e+01   1.5000000e+02   2.3700143e+00  -7.3583997e+00  -2.0486735e+01
   2.1375364e+01  -2.6171663e+01   1.5000000e+02   9.6300780e-01  -6.2663688e+00  -2.1149900e+01
   2.1486712e+01  -2.6251800e+01   1.5000000e+02  -4.2180140e-01  -5.0883468e+00  -2.1499842e+01
   2.1605202e+01  -2.6323323e+01   1.5000000e+02  -1.7315250e+00  -3.8954869e+00  -2.1571291e+01
   2.1730011e+01  -2.6385727e+01   1.5000000e+02  -2.9351202e+00  -2.7401006e+00  -2.1435392e+01
   2.1860266e+01  -2.6438570e+01   1.5000000e+02  -4.0251916e+00  -1.6451049e+00  -2.1177425e+01
   2.1995052e+01  -2.6481479e+01   1.5000000e+02  -5.0108911e+00  -6.0391174e-01  -2.0873857e+01
   2.2133419e+01  -2.6514149e+01   1.5000000e+02  -5.9061008e+00   4.1076677e-01  -2.0576090e+01
   2.2274388e+01  -2.6536348e+01   1.5000000e+02  -6.7184969e+00   1.4334525e+00  -2.0304043e+01
   2.2416960e+01  -2.6547918e+01   1.5000000e+02  -7.4432854e+00   2.4924464e+00  -2.0048901e+01
   2.2560121e+01  -2.6548777e+01   1.5000000e+02  -8.0630243e+00   3.6002108e+00  -1.9781999e+01
   2.2702855e+01  -2.6538919e+01   1.5000000e+02  -8.5528385e+00   4.7497890e+00  -1.9465926e+01
   2.2844148e+01  -2.6518414e+01   1.5000000e+02  -8.8888839e+00   5.9167959e+00  -1.9064236e+01
   2.2982999e+01  -2.6487408e+01   1.5000000e+02  -9.0572987e+00   7.0646247e+00  -1.8548025e+01
   2.3118424e+01  -2.6446121e+01   1.5000000e+02  -9.0607846e+00   8.1501628e+00  -1.7900111e+01
   2.3249467e+01  -2.6394845e+01   1.5000000e+02  -8.9210396e+00   9.1293092e+00  -1.7118257e+01
   2.3375208e+01  -2.6333945e+01   1.5000000e+02  -8.6766423e+00   9.9626655e+00  -1.6217683e+01
   2.3494767e+01  -2.6263850e+01   1.5000000e+02  -8.3773010e+00   1.0621152e+01  -1.5231701e+01
   2.3607312e+01  -2.6185057e+01   1.5000000e+02  -8.0765705e+00   1.1090007e+01  -1.4209425e+01
   2.3712068e+01  -2.6098119e+01   1.5000000e+02  -7.8245729e+00   1.1369416e+01  -1.3211907e+01
   2.3808315e+01  -2.6003648e+01   1.5000000e+02  -7.6614926e+00   1.1471959e+01  -1.2308887e+01
   2.3895402e+01  -2.5902307e+01   1.5000000e+02  -7.6108265e+00   1.1418762e+01  -1.1576526e+01
   2.3972745e+01  -2.5794804e+01   1.5000000e+02  -7.6714802e+00   1.1235737e+01  -1.1094107e+01
   2.4039831e+01  -2.5681889e+01   1.5000000e+02  -7.8098684e+00   1.0949946e+01  -1.0935674e+01
   2.4096225e+01  -2.5564347e+01   1.5000000e+02  -7.9561029e+00   1.0584974e+01  -1.1154964e+01
   2.4141569e+01  -2.5442993e+01   1.5000000e+02  -8.0094990e+00   1.0155215e+01  -1.1766642e+01
   2.4175583e+01  -2.5318666e+01   1.5000000e+02  -7.8561495e+00   9.6609275e+00  -1.2730850e+01
   2.4198068e+01  -2.5192222e+01   1.5000000e+02  -7.3957895e+00   9.0868857e+00  -1.3949116e+01
   2.4208907e+01  -2.5064529e+01   1.5000000e+02  -6.5696234e+00   8.4062573e+00  -1.5276396e+01
   2.4208062e+01  -2.4936463e+01   1.5000000e+02  -5.3784855e+00   7.5887593e+00  -1.6547723e+01
   2.4195575e+01  -2.4808896e+01   1.5000000e+02  -3.8834400e+00   6.6102487e+00  -1.7611306e+01
   2.4171566e+01  -2.4682697e+01   1.5000000e+02  -2.1884440e+00   5.4607458e+00  -1.8356251e+01
   2.4136234e+01  -2.4558721e+01   1.5000000e+02  -4.1258010e-01   4.1486322e+00  -1.8725602e+01
   2.4089849e+01  -2.4437808e+01   1.5000000e+02   1.3361773e+00   2.7003775e+00  -1.8712484e+01
   2.4032755e+01  -2.4320772e+01   1.5000000e+02   2.9765928e+00   1.1564279e+00  -1.8345145e+01
   2.3965366e+01  -2.4208401e+01   1.5000000e+02   4.4572712e+00  -4.3529485e-01  -1.7670227e+01
   2.3888159e+01  -2.4101448e+01   1.5000000e+02   5.7520899e+00  -2.0266948e+00  -1.6740528e+01
   2.3801674e+01  -2.4000630e+01   1.5000000e+02   6.8538462e+00  -3.5755572e+00  -1.5608202e+01
   2.3706508e+01  -2.3906619e+01   1.5000000e+02   7.7695759e+00  -5.0489949e+00  -1.4320900e+01
   2.3603315e+01  -2.3820042e+01   1.5000000e+02   8.5170453e+00  -6.4232085e+00  -1.2919181e+01
   2.3492793e+01  -2.3741475e+01   1.5000000e+02   9.1212016e+00  -7.6804786e+00  -1.1435524e+01
   2.2885146e+01  -2.3358892e+01   1.5000000e+02   1.0282968e+01  -1.2039244e+01  -2.7349001e+00
   2.2747192e+01  -2.3336925e+01   1.5000000e+02   1.0516677e+01  -1.2392802e+01  -1.4103313e+00
   2.2607843e+01  -2.3324592e+01   1.5000000e+02   1.0786376e+01  -1.2653360e+01  -2.2084520e-01
   2.2467885e+01  -2.3321961e+01   1.5000000e+02   1.1113094e+01  -1.2860615e+01   8.2593675e-01
   2.2328108e+01  -2.3329048e+01   1.5000000e+02   1.1514380e+01  -1.3044695e+01   1.7421074e+00
   2.2189302e+01  -2.3345813e+01   1.5000000e+02   1.2002294e+01  -1.3214088e+01   2.5503563e+00
   2.2052250e+01  -2.3372160e+01   1.5000000e+02   1.2581405e+01  -1.3351070e+01   3.2680719e+00
   2.1917727e+01  -2.3407942e+01   1.5000000e+02   1.3246519e+01  -1.3418258e+01   3.8913666e+00
   2.1786497e+01  -2.3452954e+01   1.5000000e+02   1.3980249e+01  -1.3374710e+01   4.3875062e+00
   2.1659305e+01  -2.3506944e+01   1.5000000e+02   1.4751718e+01  -1.3194348e+01   4.7003930e+00
   2.1536875e+01  -2.3569604e+01   1.5000000e+02   1.5517648e+01  -1.2877963e+01   4.7675145e+00
   2.1419911e+01  -2.3640580e+01   1.5000000e+02   1.6226660e+01  -1.2453547e+01   4.5398180e+00
   2.1309083e+01  -2.3719467e+01   1.5000000e+02   1.6825554e+01  -1.1966716e+01   3.9961196e+00
   2.1205035e+01  -2.3805818e+01   1.5000000e+02   1.7265357e+01  -1.1467604e+01   3.1472035e+00
   2.1108372e+01  -2.3899139e+01   1.5000000e+02   1.7505750e+01  -1.1000536e+01   2.0324149e+00
   2.1019662e+01  -2.3998898e+01   1.5000000e+02   1.7518202e+01  -1.0598615e+01   7.1283486e-01
   2.0939431e+01  -2.4104524e+01   1.5000000e+02   1.7289238e+01  -1.0281831e+01  -7.3551655e-01
   2.0868161e+01  -2.4215411e+01   1.5000000e+02   1.6824229e+01  -1.0056441e+01  -2.2293365e+00
   2.0806283e+01  -2.4330923e+01   1.5000000e+02   1.6149897e+01  -9.9152501e+00  -3.6881849e+00
   2.0754180e+01  -2.4450392e+01   1.5000000e+02   1.5312661e+01  -9.8401872e+00  -5.0465537e+00
   2.0712181e+01  -2.4573129e+01   1.5000000e+02   1.4371434e+01  -9.8081601e+00  -6.2644829e+00
   2.0680558e+01  -2.4698422e+01   1.5000000e+02   1.3386897e+01  -9.7990663e+00  -7.3322716e+00
   2.0659528e+01  -2.4825544e+01   1.5000000e+02   1.2411064e+01  -9.8026244e+00  -8.2682394e+00
   2.0649244e+01  -2.4953753e+01   1.5000000e+02   1.1480492e+01  -9.8206038e+00  -9.1114580e+00
   2.0649800e+01  -2.5082300e+01   1.5000000e+02   1.0613630e+01  -9.8629018e+00  -9.9132558e+00
   2.0661227e+01  -2.5210431e+01   1.5000000e+02   9.8109076e+00  -9.9387750e+00  -1.0729432e+01
   2.0683492e+01  -2.5337393e+01   1.5000000e+02   9.0558075e+00  -1.0046583e+01  -1.1612963e+01
   2.0716498e+01  -2.5462436e+01   1.5000000e+02   8.3168110e+00  -1.0165977e+01  -1.2605631e+01
   2.0760083e+01  -2.5584819e+01   1.5000000e+02   7.5514261e+00  -1.0255600e+01  -1.3728312e+01
   2.0814019e+01  -2.5703817e+01   1.5000000e+02   6.7134660e+00  -1.0257623e+01  -1.4972003e+01
   2.0878018e+01  -2.5818719e+01   1.5000000e+02   5.7630764e+00  -1.0108429e+01  -1.6293212e+01
   2.0951725e+01  -2.5928839e+01   1.5000000e+02   4.6769577e+00  -9.7530664e+00  -1.7616781e+01
   2.1034725e+01  -2.6033518e+01   1.5000000e+02   3.4560061e+00  -9.1596212e+00  -1.8847159e+01
   2.1126546e+01  -2.6132125e+01   1.5000000e+02   2.1278151e+00  -8.3292111e+00  -1.9886735e+01
   2.1226655e+01  -2.6224067e+01   1.5000000e+02   7.4226364e-01  -7.2977548e+00  -2.0657440e+01
   2.1334468e+01  -2.6308787e+01   1.5000000e+02  -6.3964724e-01  -6.1277720e+00  -2.1119330e+01
   2.1449347e+01  -2.6385773e+01   1.5000000e+02  -1.9610396e+00  -4.8924657e+00  -2.1279238e+01
   2.1570610e+01  -2.6454557e+01   1.5000000e+02  -3.1827389e+00  -3.6574815e+00  -2.1185905e+01
   2.1697530e+01  -2.6514720e+01   1.5000000e+02  -4.2898395e+00  -2.4668806e+00  -2.0913749e+01
   2.1829343e+01  -2.6565895e+01   1.5000000e+02  -5.2890748e+00  -1.3372999e+00  -2.0542074e+01
   2.1965251e+01  -2.6607770e+01   1.5000000e+02  -6.1991870e+00  -2.6077362e-01  -2.0137128e+01
   2.2104427e+01  -2.6640090e+01   1.5000000e+02  -7.0390702e+00   7.8638904e-01  -1.9741473e+01
   2.2246024e+01  -2.6662655e+01   1.5000000e+02  -7.8181563e+00   1.8322456e+00  -1.9371487e+01
   2.2389175e+01  -2.6675328e+01   1.5000000e+02  -8.5316079e+00   2.8986851e+00  -1.9021259e+01
   2.2533005e+01  -2.6678032e+01   1.5000000e+02  -9.1606728e+00   3.9944328e+00  -1.8670383e+01
   2.2676632e+01  -2.6670749e+01   1.5000000e+02  -9.6774230e+00   5.1130148e+00  -1.8292512e+01
   2.2819178e+01  -2.6653524e+01   1.5000000e+02  -1.0052462e+01   6.2353282e+00  -1.7861769e+01
   2.2959771e+01  -2.6626464e+01   1.5000000e+02  -1.0263390e+01   7.3340901e+00  -1.7355999e+01
   2.3097552e+01  -2.6589733e+01   1.5000000e+02  -1.0301806e+01   8.3776605e+00  -1.6758211e+01
   2.3231682e+01  -2.6543556e+01   1.5000000e+02  -1.0177137e+01   9.3327025e+00  -1.6058351e+01
   2.3361348e+01  -2.6488215e+01   1.5000000e+02  -9.9164178e+00   1.0166967e+01  -1.5256378e+01
   2.3485766e+01  -2.6424049e+01   1.5000000e+02  -9.5606839e+00   1.0853267e+01  -1.4365084e+01
   2.3604188e+01  -2.6351448e+01   1.5000000e+02  -9.1592494e+00   1.1373813e+01  -1.3410740e+01
   2.3715908e+01  -2.6270853e+01   1.5000000e+02  -8.7635753e+00   1.1722861e+01  -1.2431204e+01
   2.3820262e+01  -2.6182753e+01   1.5000000e+02  -8.4218215e+00   1.1906515e+01  -1.1473326e+01
   2.3916638e+01  -2.6087682e+01   1.5000000e+02  -8.1741999e+00   1.1940424e+01  -1.0591355e+01
   2.4004476e+01  -2.5986214e+01   1.5000000e+02  -8.0480584e+00   1.1846877e+01  -9.8468188e+00
   2.4083268e+01  -2.5878959e+01   1.5000000e+02  -8.0515931e+00   1.1652233e+01  -9.3076485e+00
   2.4152569e+01  -2.5766561e+01   1.5000000e+02  -8.1665578e+00   1.1384218e+01  -9.0432301e+00
   2.4211992e+01  -2.5649693e+01   1.5000000e+02  -8.3426358e+00   1.1067978e+01  -9.1137885e+00
   2.4261212e+01  -2.5529053e+01   1.5000000e+02  -8.4978112e+00   1.0720741e+01  -9.5548511e+00
   2.4299968e+01  -2.5405359e+01   1.5000000e+02  -8.5281641e+00   1.0346472e+01  -1.0361327e+01
   2.4328063e+01  -2.5279343e+01   1.5000000e+02  -8.3272627e+00   9.9329372e+00  -1.1477357e+01
   2.4345364e+01  -2.5151752e+01   1.5000000e+02  -7.8110288e+00   9.4530762e+00  -1.2797355e+01
   2.4351805e+01  -2.5023336e+01   1.5000000e+02  -6.9402777e+00   8.8707070e+00  -1.4180864e+01
   2.4347380e+01  -2.4894850e+01   1.5000000e+02  -5.7322524e+00   8.1490257e+00  -1.5478384e+01
   2.4332151e+01  -2.4767047e+01   1.5000000e+02  -4.2558395e+00   7.2595424e+00  -1.6560023e+01
   2.4306238e+01  -2.4640673e+01   1.5000000e+02  -2.6119785e+00   6.1891091e+00  -1.7336863e+01
   2.4269825e+01  -2.4516463e+01   1.5000000e+02  -9.0793840e-01   4.9435949e+00  -1.7767649e+01
   2.4223154e+01  -2.4395138e+01   1.5000000e+02   7.6401231e-01   3.5474789e+00  -1.7851465e+01
   2.4166523e+01  -2.4277400e+01   1.5000000e+02   2.3367980e+00   2.0399063e+00  -1.7613090e+01
   2.4100285e+01  -2.4163929e+01   1.5000000e+02   3.7679249e+00   4.6839907e-01  -1.7089442e+01
   2.4024848e+01  -2.4055378e+01   1.5000000e+02   5.0336416e+00  -1.1183760e+00  -1.6321606e+01
   2.3940665e+01  -2.3952370e+01   1.5000000e+02   6.1236906e+00  -2.6772695e+00  -1.5351600e+01
   2.3848239e+01  -2.3855496e+01   1.5000000e+02   7.0387318e+00  -4.1748794e+00  -1.4220307e+01
   2.3748115e+01  -2.3765309e+01   1.5000000e+02   7.7893443e+00  -5.5884371e+00  -1.2964460e+01
   2.3640879e+01  -2.3682323e+01   1.5000000e+02   8.3942083e+00  -6.9030740e+00  -1.1613626e+01
   2.3527155e+01  -2.3607013e+01   1.5000000e+02   8.8768709e+00  -8.1071086e+00  -1.0189678e+01
   2.3407598e+01  -2.3539804e+01   1.5000000e+02   9.2621478e+00  -9.1879949e+00  -8.7100061e+00
   2.3282895e+01  -2.3481081e+01   1.5000000e+02   9.5736933e+00  -1.0131143e+01  -7.1937694e+00
   2.3153759e+01  -2.3431174e+01   1.5000000e+02   9.8334763e+00  -1.0922974e+01  -5.6674903e+00
   2.3020924e+01  -2.3390368e+01   1.5000000e+02   1.0062709e+01  -1.1556843e+01  -4.1671946e+00
   2.2313461e+01  -2.3201601e+01   1.5000000e+02   1.0649867e+01  -1.3404130e+01   3.0273370e+00
   2.2174341e+01  -2.3218180e+01   1.5000000e+02   1.1126818e+01  -1.3608236e+01   3.8972833e+00
   2.2036814e+01  -2.3243714e+01   1.5000000e+02   1.1708070e+01  -1.3786729e+01   4.7133147e+00
   2.1901552e+01  -2.3278077e+01   1.5000000e+02   1.2392102e+01  -1.3896318e+01   5.4722762e+00
   2.1769220e+01  -2.3321100e+01   1.5000000e+02   1.3166890e+01  -1.3889384e+01   6.1387366e+00
   2.1640468e+01  -2.3372575e+01   1.5000000e+02   1.4007648e+01  -1.3733024e+01   6.6495354e+00
   2.1515932e+01  -2.3432246e+01   1.5000000e+02   1.4876385e+01  -1.3422505e+01   6.9303647e+00
   2.1396230e+01  -2.3499823e+01   1.5000000e+02   1.5724822e+01  -1.2983269e+01   6.9168319e+00
   2.1281956e+01  -2.3574971e+01   1.5000000e+02   1.6499858e+01  -1.2462098e+01   6.5713163e+00
   2.1173683e+01  -2.3657321e+01   1.5000000e+02   1.7149773e+01  -1.1913233e+01   5.8893273e+00
   2.1071957e+01  -2.3746467e+01   1.5000000e+02   1.7628892e+01  -1.1386470e+01   4.8968478e+00
   2.0977292e+01  -2.3841967e+01   1.5000000e+02   1.7900317e+01  -1.0920709e+01   3.6433906e+00
   2.0890172e+01  -2.3943350e+01   1.5000000e+02   1.7938004e+01  -1.0542142e+01   2.1953077e+00
   2.0811049e+01  -2.4050112e+01   1.5000000e+02   1.7729865e+01  -1.0264126e+01   6.3063641e-01
   2.0740335e+01  -2.4161722e+01   1.5000000e+02   1.7281844e+01  -1.0086772e+01  -9.6723112e-01
   2.0678403e+01  -2.4277624e+01   1.5000000e+02   1.6620490e+01  -9.9968975e+00  -2.5190426e+00
   2.0625589e+01  -2.4397238e+01   1.5000000e+02   1.5790950e+01  -9.9703888e+00  -3.9612879e+00
   2.0582181e+01  -2.4519965e+01   1.5000000e+02   1.4849363e+01  -9.9782242e+00  -5.2556487e+00
   2.0548425e+01  -2.4645188e+01   1.5000000e+02   1.3852172e+01  -9.9949888e+00  -6.3920305e+00
   2.0524521e+01  -2.4772277e+01   1.5000000e+02   1.2846796e+01  -1.0006659e+01  -7.3844376e+00
   2.0510619e+01  -2.4900589e+01   1.5000000e+02   1.1866964e+01  -1.0014272e+01  -8.2628533e+00
   2.0506821e+01  -2.5029474e+01   1.5000000e+02   1.0932658e+01  -1.0031736e+01  -9.0658246e+00
   2.0513178e+01  -2.5158276e+01   1.5000000e+02   1.0052145e+01  -1.0078419e+01  -9.8361691e+00
   2.0529689e+01  -2.5286339e+01   1.5000000e+02   9.2231426e+00  -1.0169015e+01  -1.0619018e+01
   2.0556303e+01  -2.5413007e+01   1.5000000e+02   8.4323214e+00  -1.0303864e+01  -1.1459031e+01
   2.0592913e+01  -2.5537629e+01   1.5000000e+02   7.6546211e+00  -1.0462615e+01  -1.2394278e+01
   2.0639364e+01  -2.5659565e+01   1.5000000e+02   6.8549633e+00  -1.0603129e+01  -1.3447019e+01
   2.0695445e+01  -2.5778184e+01   1.5000000e+02   5.9937953e+00  -1.0666353e+01  -1.4614159e+01
   2.0760893e+01  -2.5892871e+01   1.5000000e+02   5.0355961e+00  -1.0586517e+01  -1.5861486e+01
   2.0835398e+01  -2.6003030e+01   1.5000000e+02   3.9581169e+00  -1.0304668e+01  -1.7124439e+01
   2.0918594e+01  -2.6108086e+01   1.5000000e+02   2.7598690e+00  -9.7825241e+00  -1.8316368e+01
   2.1010072e+01  -2.6207491e+01   1.5000000e+02   1.4636234e+00  -9.0127525e+00  -1.9344050e+01
   2.1109371e+01  -2.6300723e+01   1.5000000e+02   1.1402591e-01  -8.0222016e+00  -2.0127328e+01
   2.1215991e+01  -2.6387291e+01   1.5000000e+02  -1.2317173e+00  -6.8658994e+00  -2.0617735e+01
   2.1329383e+01  -2.6466740e+01   1.5000000e+02  -2.5179562e+00  -5.6135023e+00  -2.0808952e+01
   2.1448965e+01  -2.6538649e+01   1.5000000e+02  -3.7044893e+00  -4.3325385e+00  -2.0735220e+01
   2.1574114e+01  -2.6602638e+01   1.5000000e+02  -4.7746913e+00  -3.0745707e+00  -2.0458588e+01
   2.1704176e+01  -2.6658366e+01   1.5000000e+02  -5.7349344e+00  -1.8679831e+00  -2.0050991e+01
   2.1838468e+01  -2.6705539e+01   1.5000000e+02  -6.6067064e+00  -7.1826882e-01  -1.9577794e+01
   2.1976280e+01  -2.6743904e+01   1.5000000e+02  -7.4153223e+00   3.8608459e-01  -1.9087294e+01
   2.2116882e+01  -2.6773258e+01   1.5000000e+02  -8.1798331e+00   1.4650577e+00  -1.8606875e+01
   2.2259526e+01  -2.6793443e+01   1.5000000e+02  -8.9064840e+00   2.5381743e+00  -1.8144733e+01
   2.2403453e+01  -2.6804352e+01   1.5000000e+02  -9.5866400e+00   3.6173600e+00  -1.7695074e+01
   2.2547895e+01  -2.6805927e+01   1.5000000e+02  -1.0198499e+01   4.7031931e+00  -1.7244921e+01
   2.2692082e+01  -2.6798159e+01   1.5000000e+02  -1.0711851e+01   5.7855415e+00  -1.6780001e+01
   2.2835244e+01  -2.6781090e+01   1.5000000e+02  -1.1094840e+01   6.8473880e+00  -1.6287555e+01
   2.2976618e+01  -2.6754810e+01   1.5000000e+02  -1.1321424e+01   7.8689181e+00  -1.5755895e+01
   2.3115452e+01  -2.6719461e+01   1.5000000e+02  -1.1377859e+01   8.8293787e+00  -1.5172981e+01
   2.3251011e+01  -2.6675231e+01   1.5000000e+02  -1.1266516e+01   9.7069345e+00  -1.4527171e+01
   2.3382576e+01  -2.6622354e+01   1.5000000e+02  -1.1006365e+01   1.0478876e+01  -1.3810711e+01
   2.3509455e+01  -2.6561113e+01   1.5000000e+02  -1.0630466e+01   1.1124002e+01  -1.3023823e+01
   2.3630984e+01  -2.6491832e+01   1.5000000e+02  -1.0181429e+01   1.1626373e+01  -1.2177154e+01
   2.3746529e+01  -2.6414879e+01   1.5000000e+02  -9.7063305e+00   1.1978480e+01  -1.1291401e+01
   2.3855494e+01  -2.6330661e+01   1.5000000e+02  -9.2520351e+00   1.2182268e+01  -1.0395437e+01
   2.3957318e+01  -2.6239621e+01   1.5000000e+02  -8.8614789e+00   1.2248094e+01  -9.5249680e+00
   2.4051485e+01  -2.6142240e+01   1.5000000e+02  -8.5705532e+00   1.2192954e+01  -8.7224891e+00
   2.4137520e+01  -2.6039027e+01   1.5000000e+02  -8.4044419e+00   1.2038892e+01  -8.0383353e+00
   2.4214996e+01  -2.5930524e+01   1.5000000e+02  -8.3726053e+00   1.1811595e+01  -7.5304408e+00
   2.4283534e+01  -2.5817298e+01   1.5000000e+02  -8.4624832e+00   1.1538203e+01  -7.2608335e+00
   2.4342803e+01  -2.5699936e+01   1.5000000e+02  -8.6340500e+00   1.1243576e+01  -7.2873077e+00
   2.4392524e+01  -2.5579048e+01   1.5000000e+02  -8.8185524e+00   1.0945240e+01  -7.6507498e+00
   2.4432471e+01  -2.5455260e+01   1.5000000e+02  -8.9244721e+00   1.0648284e+01  -8.3610862e+00
   2.4462467e+01  -2.5329209e+01   1.5000000e+02  -8.8517481e+00   1.0342189e+01  -9.3862173e+00
   2.4482391e+01  -2.5201543e+01   1.5000000e+02  -8.5123048e+00   1.0001093e+01  -1.0648477e+01
   2.4492172e+01  -2.5072917e+01   1.5000000e+02  -7.8515548e+00   9.5877530e+00  -1.2032581e+01
   2.4491793e+01  -2.4943986e+01   1.5000000e+02  -6.8632746e+00   9.0603502e+00  -1.3404917e+01
   2.4481286e+01  -2.4815408e+01   1.5000000e+02  -5.5912400e+00   8.3806944e+00  -1.4639007e+01
   2.4460738e+01  -2.4687835e+01   1.5000000e+02  -4.1161447e+00   7.5220156e+00  -1.5637961e+01
   2.4430282e+01  -2.4561912e+01   1.5000000e+02  -2.5333683e+00   6.4745669e+00  -1.6345700e+01
   2.4390102e+01  -2.4438274e+01   1.5000000e+02  -9.3132758e-01   5.2478889e+00  -1.6744283e+01
   2.4340427e+01  -2.4317543e+01   1.5000000e+02   6.2154079e-01   3.8693801e+00  -1.6842045e+01
   2.4281532e+01  -2.4200325e+01   1.5000000e+02   2.0787419e+00   2.3799259e+00  -1.6660369e+01
   2.4213738e+01  -2.4087206e+01   1.5000000e+02   3.4104511e+00   8.2759641e-01  -1.6225462e+01
   2.4137403e+01  -2.3978750e+01   1.5000000e+02   4.5973476e+00  -7.3947172e-01  -1.5566241e+01
   2.4052930e+01  -2.3875497e+01   1.5000000e+02   5.6276340e+00  -2.2794365e+00  -1.4714874e+01
   2.3960755e+01  -2.3777959e+01   1.5000000e+02   6.4976065e+00  -3.7611257e+00  -1.3705899e+01
   2.3861352e+01  -2.3686621e+01   1.5000000e+02   7.2127385e+00  -5.1648331e+00  -1.2572498e+01
   2.3755225e+01  -2.3601934e+01   1.5000000e+02   7.7870463e+00  -6.4797212e+00  -1.1341782e+01
   2.3642911e+01  -2.3524316e+01   1.5000000e+02   8.2401584e+00  -7.6987440e+00  -1.0032447e+01
   2.3524973e+01  -2.3454149e+01   1.5000000e+02   8.5936838e+00  -8.8136166e+00  -8.6566078e+00
   2.3401998e+01  -2.3391780e+01   1.5000000e+02   8.8685627e+00  -9.8120904e+00  -7.2253843e+00
   2.3274596e+01  -2.3337513e+01   1.5000000e+02   9.0842958e+00  -1.0679133e+01  -5.7554812e+00
   2.3143399e+01  -2.3291616e+01   1.5000000e+02   9.2598139e+00  -1.1401748e+01  -4.2736774e+00
   2.3009050e+01  -2.3254314e+01   1.5000000e+02   9.4148676e+00  -1.1975716e+01  -2.8164366e+00
   2.2872211e+01  -2.3225789e+01   1.5000000e+02   9.5708439e+00  -1.2411187e+01  -1.4244920e+00
   2.2733552e+01  -2.3206182e+01   1.5000000e+02   9.7505432e+00  -1.2734372e+01  -1.3352534e-01
   2.2593752e+01  -2.3195587e+01   1.5000000e+02   9.9768140e+00  -1.2983232e+01   1.0356094e+00
   2.2453493e+01  -2.3194058e+01   1.5000000e+02   1.0270748e+01  -1.3197261e+01   2.0828296e+00
   2.1717233e+01  -2.3201844e+01   1.5000000e+02   1.2370818e+01  -1.4360624e+01   7.9609389e+00
   2.1589456e+01  -2.3252610e+01   1.5000000e+02   1.3259845e+01  -1.4186754e+01   8.6295159e+00
   2.1465502e+01  -2.3310923e+01   1.5000000e+02   1.4197569e+01  -1.3847671e+01   9.0734105e+00
   2.1345895e+01  -2.3376537e+01   1.5000000e+02   1.5139760e+01  -1.3372163e+01   9.2212500e+00
   2.1231146e+01  -2.3449175e+01   1.5000000e+02   1.6036096e+01  -1.2809861e+01   9.0285466e+00
   2.1121746e+01  -2.3528533e+01   1.5000000e+02   1.6835982e+01  -1.2217277e+01   8.4838507e+00
   2.1018166e+01  -2.3614274e+01   1.5000000e+02   1.7493080e+01  -1.1645961e+01   7.6058166e+00
   2.0920855e+01  -2.3706036e+01   1.5000000e+02   1.7967825e+01  -1.1136235e+01   6.4357202e+00
   2.0830238e+01  -2.3803431e+01   1.5000000e+02   1.8228648e+01  -1.0716011e+01   5.0307976e+00
   2.0746715e+01  -2.3906044e+01   1.5000000e+02   1.8253869e+01  -1.0401618e+01   3.4601481e+00
   2.0670657e+01  -2.4013440e+01   1.5000000e+02   1.8035314e+01  -1.0197982e+01   1.8012645e+00
   2.0602407e+01  -2.4125160e+01   1.5000000e+02   1.7582550e+01  -1.0097753e+01   1.3429865e-01
   2.0542276e+01  -2.4240728e+01   1.5000000e+02   1.6924731e+01  -1.0081103e+01  -1.4676254e+00
   2.0490546e+01  -2.4359647e+01   1.5000000e+02   1.6107284e+01  -1.0118411e+01  -2.9492966e+00
   2.0447460e+01  -2.4481407e+01   1.5000000e+02   1.5183222e+01  -1.0176555e+01  -4.2809478e+00
   2.0413229e+01  -2.4605485e+01   1.5000000e+02   1.4202485e+01  -1.0227256e+01  -5.4584694e+00
   2.0388028e+01  -2.4731343e+01   1.5000000e+02   1.3203987e+01  -1.0254475e+01  -6.4966169e+00
   2.0371993e+01  -2.4858436e+01   1.5000000e+02   1.2213245e+01  -1.0258123e+01  -7.4195241e+00
   2.0365222e+01  -2.4986213e+01   1.5000000e+02   1.1245182e+01  -1.0252777e+01  -8.2535041e+00
   2.0367773e+01  -2.5114117e+01   1.5000000e+02   1.0308724e+01  -1.0261946e+01  -9.0250409e+00
   2.0379663e+01  -2.5241588e+01   1.5000000e+02   9.4094346e+00  -1.0309623e+01  -9.7630077e+00
   2.0400871e+01  -2.5368068e+01   1.5000000e+02   8.5485491e+00  -1.0411343e+01  -1.0501322e+01
   2.0431332e+01  -2.5492999e+01   1.5000000e+02   7.7196658e+00  -1.0566740e+01  -1.1278068e+01
   2.0470940e+01  -2.5615832e+01   1.5000000e+02   6.9059237e+00  -1.0755149e+01  -1.2129683e+01
   2.0519549e+01  -2.5736021e+01   1.5000000e+02   6.0804463e+00  -1.0935386e+01  -1.3081488e+01
   2.0576970e+01  -2.5853033e+01   1.5000000e+02   5.2105910e+00  -1.1050273e+01  -1.4138074e+01
   2.0642973e+01  -2.5966347e+01   1.5000000e+02   4.2651010e+00  -1.1035507e+01  -1.5276792e+01
   2.0717289e+01  -2.6075456e+01   1.5000000e+02   3.2221810e+00  -1.0831493e+01  -1.6446664e+01
   2.0799606e+01  -2.6179872e+01   1.5000000e+02   2.0767105e+00  -1.0395823e+01  -1.7573742e+01
   2.0889578e+01  -2.6279124e+01   1.5000000e+02   8.4483781e-01  -9.7132353e+00  -1.8573274e+01
   2.0986819e+01  -2.6372765e+01   1.5000000e+02  -4.3646476e-01  -8.7999002e+00  -1.9366774e+01
   2.1090905e+01  -2.6460372e+01   1.5000000e+02  -1.7162413e+00  -7.6998767e+00  -1.9899550e+01
   2.1201383e+01  -2.6541549e+01   1.5000000e+02  -2.9418262e+00  -6.4743348e+00  -2.0152429e+01
   2.1317763e+01  -2.6615925e+01   1.5000000e+02  -4.0721825e+00  -5.1874061e+00  -2.0143027e+01
   2.1439528e+01  -2.6683162e+01   1.5000000e+02  -5.0872833e+00  -3.8932601e+00  -1.9916902e+01
   2.1566131e+01  -2.6742955e+01   1.5000000e+02  -5.9899052e+00  -2.6284554e+00  -1.9532969e+01
   2.1697003e+01  -2.6795028e+01   1.5000000e+02  -6.8002089e+00  -1.4103671e+00  -1.9049306e+01
   2.1831550e+01  -2.6839145e+01   1.5000000e+02  -7.5462972e+00  -2.4041587e-01  -1.8513297e+01
   2.1969161e+01  -2.6875102e+01   1.5000000e+02  -8.2544434e+00   8.9023396e-01  -1.7957463e+01
   2.2109206e+01  -2.6902734e+01   1.5000000e+02  -8.9419425e+00   1.9942524e+00  -1.7399567e+01
   2.2251046e+01  -2.6921915e+01   1.5000000e+02  -9.6134277e+00   3.0821841e+00  -1.6845558e+01
   2.2394029e+01  -2.6932557e+01   1.5000000e+02  -1.0260233e+01   4.1578311e+00  -1.6294188e+01
   2.2537499e+01  -2.6934610e+01   1.5000000e+02  -1.0862134e+01   5.2165168e+00  -1.5742106e+01
   2.2680797e+01  -2.6928065e+01   1.5000000e+02  -1.1390817e+01   6.2469080e+00  -1.5187603e+01
   2.2823264e+01  -2.6912952e+01   1.5000000e+02  -1.1814738e+01   7.2353508e+00  -1.4631148e+01
   2.2964246e+01  -2.6889341e+01   1.5000000e+02  -1.2104945e+01   8.1697614e+00  -1.4072437e+01
   2.3103099e+01  -2.6857339e+01   1.5000000e+02  -1.2240834e+01   9.0403611e+00  -1.3506613e+01
   2.3239186e+01  -2.6817095e+01   1.5000000e+02  -1.2214525e+01   9.8374265e+00  -1.2923163e+01
   2.3371887e+01  -2.6768793e+01   1.5000000e+02  -1.2032706e+01   1.0548966e+01  -1.2308944e+01
   2.3500601e+01  -2.6712653e+01   1.5000000e+02  -1.1715792e+01   1.1160831e+01  -1.1653303e+01
   2.3624745e+01  -2.6648934e+01   1.5000000e+02  -1.1295069e+01   1.1659396e+01  -1.0952256e+01
   2.3743763e+01  -2.6577925e+01   1.5000000e+02  -1.0808756e+01   1.2034980e+01  -1.0210058e+01
   2.3857121e+01  -2.6499951e+01   1.5000000e+02  -1.0298067e+01   1.2283953e+01  -9.4385529e+00
   2.3964317e+01  -2.6415367e+01   1.5000000e+02  -9.8037451e+00   1.2409090e+01  -8.6558791e+00
   2.4064881e+01  -2.6324555e+01   1.5000000e+02  -9.3634091e+00   1.2418845e+01  -7.8859560e+00
   2.4158373e+01  -2.6227927e+01   1.5000000e+02  -9.0094990e+00   1.2326657e+01  -7.1590306e+00
   2.4244391e+01  -2.6125919e+01   1.5000000e+02  -8.7670734e+00   1.2150666e+01  -6.5126412e+00
   2.4322568e+01  -2.6018991e+01   1.5000000e+02  -8.6506867e+00   1.1913278e+01  -5.9921027e+00
   2.4392575e+01  -2.5907622e+01   1.5000000e+02  -8.6598835e+00   1.1639738e+01  -5.6490803e+00
   2.4454124e+01  -2.5792311e+01   1.5000000e+02  -8.7740872e+00   1.1355215e+01  -5.5370431e+00
   2.4506966e+01  -2.5673573e+01   1.5000000e+02  -8.9489697e+00   1.1080574e+01  -5.7031519e+00
   2.4550892e+01  -2.5551935e+01   1.5000000e+02  -9.1170080e+00   1.0827677e+01  -6.1773528e+00
   2.4585736e+01  -2.5427937e+01   1.5000000e+02  -9.1941879e+00   1.0595543e+01  -6.9609919e+00
   2.4611372e+01  -2.5302127e+01   1.5000000e+02  -9.0932361e+00   1.0368568e+01  -8.0185379e+00
   2.4627716e+01  -2.5175060e+01   1.5000000e+02  -8.7414626e+00   1.0117521e+01  -9.2761971e+00
   2.4634725e+01  -2.5047293e+01   1.5000000e+02  -8.0983695e+00   9.8032824e+00  -1.0630568e+01
   2.4632399e+01  -2.4919386e+01   1.5000000e+02  -7.1663414e+00   9.3828329e+00  -1.1966583e+01
   2.4620777e+01  -2.4791896e+01   1.5000000e+02  -5.9891685e+00   8.8164948e+00  -1.3179441e+01
   2.4599937e+01  -2.4665380e+01   1.5000000e+02  -4.6385748e+00   8.0750398e+00  -1.4191933e+01
   2.4569998e+01  -2.4540385e+01   1.5000000e+02  -3.1944830e+00   7.1449689e+00  -1.4961052e+01
   2.4531116e+01  -2.4417453e+01   1.5000000e+02  -1.7276764e+00   6.0308962e+00  -1.5473046e+01
   2.4483484e+01  -2.4297112e+01   1.5000000e+02  -2.9088958e-01   4.7546987e+00  -1.5731865e+01
   2.4427330e+01  -2.4179882e+01   1.5000000e+02   1.0803848e+00   3.3521560e+00  -1.5748147e+01
   2.4362920e+01  -2.4066264e+01   1.5000000e+02   2.3615554e+00   1.8677091e+00  -1.5533831e+01
   2.4290548e+01  -2.3956746e+01   1.5000000e+02   3.5327352e+00   3.4825888e-01  -1.5103073e+01
   2.4210544e+01  -2.3851793e+01   1.5000000e+02   4.5766389e+00  -1.1631150e+00  -1.4475534e+01
   2.4123266e+01  -2.3751854e+01   1.5000000e+02   5.4806398e+00  -2.6322231e+00  -1.3677859e+01
   2.4029099e+01  -2.3657353e+01   1.5000000e+02   6.2400659e+00  -4.0364127e+00  -1.2740809e+01
   2.3928457e+01  -2.3568691e+01   1.5000000e+02   6.8595909e+00  -5.3638604e+00  -1.1693622e+01
   2.3821778e+01  -2.3486242e+01   1.5000000e+02   7.3517856e+00  -6.6100492e+00  -1.0558704e+01
   2.3709522e+01  -2.3410356e+01   1.5000000e+02   7.7337394e+00  -7.7725961e+00  -9.3495971e+00
   2.3592172e+01  -2.3341352e+01   1.5000000e+02   8.0236175e+00  -8.8464763e+00  -8.0731704e+00
   2.3470229e+01  -2.3279522e+01   1.5000000e+02   8.2386682e+00  -9.8215146e+00  -6.7351711e+00
   2.3344211e+01  -2.3225124e+01   1.5000000e+02   8.3950390e+00  -1.0683339e+01  -5.3465634e+00
   2.3214650e+01  -2.3178389e+01   1.5000000e+02   8.5089600e+00  -1.1417614e+01  -3.9280752e+00
   2.3082095e+01  -2.3139511e+01   1.5000000e+02   8.5981224e+00  -1.2016219e+01  -2.5107032e+00
   2.2947102e+01  -2.3108655e+01   1.5000000e+02   8.6825116e+00  -1.2483108e+01  -1.1316306e+00
   2.2810237e+01  -2.3085949e+01   1.5000000e+02   8.7840259e+00  -1.2837384e+01   1.7362936e-01
   2.2672075e+01  -2.3071488e+01   1.5000000e+02   8.9251782e+00  -1.3111621e+01   1.3804676e+00
   2.2533193e+01  -2.3065334e+01   1.5000000e+02   9.1273178e+00  -1.3344743e+01   2.4825915e+00
   2.2394173e+01  -2.3067512e+01   1.5000000e+02   9.4090115e+00  -1.3570742e+01   3.4940601e+00
   2.2255595e+01  -2.3078012e+01   1.5000000e+02   9.7851500e+00  -1.3806584e+01   4.4438523e+00
   2.2118039e+01  -2.3096791e+01   1.5000000e+02   1.0266571e+01  -1.4043898e+01   5.3631587e+00
   2.1982081e+01  -2.3123771e+01   1.5000000e+02   1.0859473e+01  -1.4248703e+01   6.2689827e+00
   2.1848292e+01  -2.3158837e+01   1.5000000e+02   1.1563839e+01  -1.4370830e+01   7.1499835e+00
   2.1145197e+01  -2.3348129e+01   1.5000000e+02   1.5600802e+01  -1.2889398e+01   1.1383354e+01
   2.1034417e+01  -2.3428449e+01   1.5000000e+02   1.6514452e+01  -1.2240004e+01   1.0871331e+01
   2.0929208e+01  -2.3514920e+01   1.5000000e+02   1.7296332e+01  -1.1629090e+01   1.0003888e+01
   2.0829984e+01  -2.3607211e+01   1.5000000e+02   1.7904950e+01  -1.1095926e+01   8.8234650e+00
   2.0737135e+01  -2.3704970e+01   1.5000000e+02   1.8305593e+01  -1.0666712e+01   7.3867711e+00
   2.0651028e+01  -2.3807824e+01   1.5000000e+02   1.8471832e+01  -1.0356522e+01   5.7615647e+00
   2.0572011e+01  -2.3915378e+01   1.5000000e+02   1.8389149e+01  -1.0169880e+01   4.0248204e+00
   2.0500403e+01  -2.4027220e+01   1.5000000e+02   1.8060001e+01  -1.0099511e+01   2.2583668e+00
   2.0436500e+01  -2.4142920e+01   1.5000000e+02   1.7507286e+01  -1.0125197e+01   5.3991731e-01
   2.0380567e+01  -2.4262030e+01   1.5000000e+02   1.6772721e+01  -1.0215258e+01  -1.0687501e+00
   2.0332845e+01  -2.4384091e+01   1.5000000e+02   1.5908773e+01  -1.0331911e+01  -2.5315273e+00
   2.0293540e+01  -2.4508629e+01   1.5000000e+02   1.4966821e+01  -1.0439462e+01  -3.8400180e+00
   2.0262832e+01  -2.4635160e+01   1.5000000e+02   1.3986736e+01  -1.0512551e+01  -5.0070151e+00
   2.0240865e+01  -2.4763189e+01   1.5000000e+02   1.2992611e+01  -1.0541634e+01  -6.0545711e+00
   2.0227752e+01  -2.4892218e+01   1.5000000e+02   1.1995690e+01  -1.0534051e+01  -7.0033149e+00
   2.0223573e+01  -2.5021738e+01   1.5000000e+02   1.1001713e+01  -1.0510756e+01  -7.8678212e+00
   2.0228372e+01  -2.5151242e+01   1.5000000e+02   1.0017480e+01  -1.0499977e+01  -8.6595080e+00
   2.0242159e+01  -2.5280216e+01   1.5000000e+02   9.0530580e+00  -1.0529435e+01  -9.3935737e+00
   2.0264908e+01  -2.5408150e+01   1.5000000e+02   8.1186416e+00  -1.0618614e+01  -1.0095002e+01
   2.0296556e+01  -2.5534537e+01   1.5000000e+02   7.2187356e+00  -1.0772140e+01  -1.0799296e+01
   2.0337006e+01  -2.5658872e+01   1.5000000e+02   6.3472332e+00  -1.0975255e+01  -1.1546958e+01
   2.0386124e+01  -2.5780658e+01   1.5000000e+02   5.4859894e+00  -1.1192499e+01  -1.2373589e+01
   2.0443739e+01  -2.5899405e+01   1.5000000e+02   4.6076476e+00  -1.1370505e+01  -1.3298966e+01
   2.0509646e+01  -2.6014637e+01   1.5000000e+02   3.6816200e+00  -1.1445170e+01  -1.4318374e+01
   2.0583602e+01  -2.6125888e+01   1.5000000e+02   2.6818793e+00  -1.1352344e+01  -1.5398269e+01
   2.0665331e+01  -2.6232708e+01   1.5000000e+02   1.5950447e+00  -1.1040178e+01  -1.6478107e+01
   2.0754524e+01  -2.6334661e+01   1.5000000e+02   4.2709745e-01  -1.0480312e+01  -1.7479297e+01
   2.0850836e+01  -2.6431334e+01   1.5000000e+02  -7.9415470e-01  -9.6745890e+00  -1.8320735e+01
   2.0953892e+01  -2.6522331e+01   1.5000000e+02  -2.0231407e+00  -8.6544784e+00  -1.8937122e+01
   2.1063287e+01  -2.6607279e+01   1.5000000e+02  -3.2074171e+00  -7.4728935e+00  -1.9293500e+01
   2.1178586e+01  -2.6685829e+01   1.5000000e+02  -4.3016232e+00  -6.1911823e+00  -1.9390344e+01
   2.1299326e+01  -2.6757658e+01   1.5000000e+02  -5.2790277e+00  -4.8660665e+00  -1.9257916e+01
   2.1425020e+01  -2.6822469e+01   1.5000000e+02  -6.1362857e+00  -3.5407688e+00  -1.8943533e+01
   2.1555157e+01  -2.6879996e+01   1.5000000e+02  -6.8904842e+00  -2.2420347e+00  -1.8497756e+01
   2.1689206e+01  -2.6929998e+01   1.5000000e+02  -7.5707792e+00  -9.8194150e-01  -1.7964516e+01
   2.1826617e+01  -2.6972270e+01   1.5000000e+02  -8.2086847e+00   2.3791952e-01  -1.7376591e+01
   2.1966823e+01  -2.7006635e+01   1.5000000e+02  -8.8300578e+00   1.4217040e+00  -1.6755499e+01
   2.2109244e+01  -2.7032950e+01   1.5000000e+02  -9.4504133e+00   2.5748301e+00  -1.6113514e+01
   2.2253289e+01  -2.7051107e+01   1.5000000e+02  -1.0073209e+01   3.6998058e+00  -1.5456750e+01
   2.2398361e+01  -2.7061029e+01   1.5000000e+02  -1.0690148e+01   4.7931064e+00  -1.4789052e+01
   2.2543856e+01  -2.7062675e+01   1.5000000e+02  -1.1282633e+01   5.8445923e+00  -1.4116055e+01
   2.2689169e+01  -2.7056037e+01   1.5000000e+02  -1.1824100e+01   6.8405008e+00  -1.3447771e+01
   2.2833694e+01  -2.7041145e+01   1.5000000e+02  -1.2283403e+01   7.7687751e+00  -1.2797327e+01
   2.2976832e+01  -2.7018060e+01   1.5000000e+02  -1.2629417e+01   8.6232216e+00  -1.2175797e+01
   2.3117987e+01  -2.6986877e+01   1.5000000e+02  -1.2836399e+01   9.4032841e+00  -1.1586046e+01
   2.3256577e+01  -2.6947727e+01   1.5000000e+02  -1.2888913e+01   1.0109858e+01  -1.1020100e+01
   2.3392029e+01  -2.6900773e+01   1.5000000e+02  -1.2784777e+01   1.0740595e+01  -1.0462205e+01
   2.3523785e+01  -2.6846208e+01   1.5000000e+02  -1.2535403e+01   1.1288409e+01  -9.8950558e+00
   2.3651306e+01  -2.6784261e+01   1.5000000e+02  -1.2163930e+01   1.1743548e+01  -9.3053020e+00
   2.3774074e+01  -2.6715185e+01   1.5000000e+02  -1.1701964e+01   1.2097049e+01  -8.6864079e+00
   2.3891591e+01  -2.6639268e+01   1.5000000e+02  -1.1186072e+01   1.2343274e+01  -8.0387336e+00
   2.4003384e+01  -2.6556821e+01   1.5000000e+02  -1.0654346e+01   1.2480746e+01  -7.3689064e+00
   2.4109009e+01  -2.6468184e+01   1.5000000e+02  -1.0143616e+01   1.2512007e+01  -6.6893989e+00
   2.4208047e+01  -2.6373721e+01   1.5000000e+02  -9.6872798e+00   1.2443640e+01  -6.0189407e+00
   2.4300111e+01  -2.6273816e+01   1.5000000e+02  -9.3137560e+00   1.2286951e+01  -5.3829856e+00
   2.4384844e+01  -2.6168879e+01   1.5000000e+02  -9.0451675e+00   1.2058721e+01  -4.8140687e+00
   2.4461924e+01  -2.6059335e+01   1.5000000e+02  -8.8952571e+00   1.1781045e+01  -4.3517882e+00
   2.4531059e+01  -2.5945630e+01   1.5000000e+02  -8.8658913e+00   1.1479675e+01  -4.0419006e+00
   2.4591995e+01  -2.5828222e+01   1.5000000e+02  -8.9423484e+00   1.1180828e+01  -3.9332094e+00
   2.4644510e+01  -2.5707585e+01   1.5000000e+02  -9.0892078e+00   1.0906979e+01  -4.0713724e+00
   2.4688422e+01  -2.5584204e+01   1.5000000e+02  -9.2493762e+00   1.0672277e+01  -4.4895401e+00
   2.4723581e+01  -2.5458573e+01   1.5000000e+02  -9.3483936e+00   1.0478664e+01  -5.1977370e+00
   2.4749874e+01  -2.5331192e+01   1.5000000e+02  -9.3050521e+00   1.0313584e+01  -6.1736739e+00
   2.4767226e+01  -2.5202570e+01   1.5000000e+02  -9.0473700e+00   1.0150014e+01  -7.3591229e+00
   2.4775596e+01  -2.5073216e+01   1.5000000e+02  -8.5298909e+00   9.9490791e+00  -8.6657968e+00
   2.4774981e+01  -2.4943641e+01   1.5000000e+02  -7.7456568e+00   9.6651838e+00  -9.9908491e+00
   2.4765409e+01  -2.4814356e+01   1.5000000e+02  -6.7269314e+00   9.2530437e+00  -1.1237531e+01
   2.4746948e+01  -2.4685869e+01   1.5000000e+02  -5.5337819e+00   8.6752513e+00  -1.2332389e+01
   2.4719697e+01  -2.4558683e+01   1.5000000e+02  -4.2356553e+00   7.9085676e+00  -1.3232564e+01
   2.4683788e+01  -2.4433295e+01   1.5000000e+02  -2.8943163e+00   6.9475106e+00  -1.3921441e+01
   2.4639386e+01  -2.4310193e+01   1.5000000e+02  -1.5548011e+00   5.8047705e+00  -1.4397174e+01
   2.4586688e+01  -2.4189855e+01   1.5000000e+02  -2.4624277e-01   4.5089257e+00  -1.4661246e+01
   2.4525921e+01  -2.4072746e+01   1.5000000e+02   1.0108206e+00   3.1002202e+00  -1.4712917e+01
   2.4457340e+01  -2.3959319e+01   1.5000000e+02   2.1966570e+00   1.6250955e+00  -1.4551118e+01
   2.4381229e+01  -2.3850011e+01   1.5000000e+02   3.2891166e+00   1.3000252e-01  -1.4180568e+01
   2.4297899e+01  -2.3745241e+01   1.5000000e+02   4.2661072e+00  -1.3445751e+00  -1.3616741e+01
   2.4207686e+01  -2.3645412e+01   1.5000000e+02   5.1109937e+00  -2.7685434e+00  -1.2885787e+01
   2.4110948e+01  -2.3550906e+01   1.5000000e+02   5.8169141e+00  -4.1239814e+00  -1.2019235e+01
   2.4008069e+01  -2.3462082e+01   1.5000000e+02   6.3875036e+00  -5.4037206e+00  -1.1046560e+01
   2.3899452e+01  -2.3379281e+01   1.5000000e+02   6.8343883e+00  -6.6073842e+00  -9.9893105e+00
   2.3785519e+01  -2.3302816e+01   1.5000000e+02   7.1731660e+00  -7.7361762e+00  -8.8589910e+00
   2.3666711e+01  -2.3232978e+01   1.5000000e+02   7.4199451e+00  -8.7879848e+00  -7.6594952e+00
   2.3543485e+01  -2.3170032e+01   1.5000000e+02   7.5896782e+00  -9.7546712e+00  -6.3926912e+00
   2.3416313e+01  -2.3114217e+01   1.5000000e+02   7.6964587e+00  -1.0622542e+01  -5.0650262e+00
   2.3285681e+01  -2.3065743e+01   1.5000000e+02   7.7550439e+00  -1.1376096e+01  -3.6925003e+00
   2.3152084e+01  -2.3024795e+01   1.5000000e+02   7.7824926e+00  -1.2003931e+01  -2.3020563e+00
   2.3016028e+01  -2.2991526e+01   1.5000000e+02   7.7988314e+00  -1.2504930e+01  -9.2852548e-01
   2.2878028e+01  -2.2966062e+01   1.5000000e+02   7.8265176e+00  -1.2892494e+01   3.9231317e-01
   2.2738605e+01  -2.2948500e+01   1.5000000e+02   7.8888218e+00  -1.3194751e+01   1.6328843e+00
   2.2598284e+01  -2.2938904e+01   1.5000000e+02   8.0077771e+00  -1.3449508e+01   2.7822215e+00
   2.2457593e+01  -2.2937313e+01   1.5000000e+02   8.2025893e+00  -1.3694423e+01   3.8502599e+00
   2.2317061e+01  -2.2943731e+01   1.5000000e+02   8.4888521e+00  -1.3954834e+01   4.8656054e+00
   2.2177218e+01  -2.2958135e+01   1.5000000e+02   8.8788601e+00  -1.4233119e+01   5.8657018e+00
   2.2038590e+01  -2.2980470e+01   1.5000000e+02   9.3820927e+00  -1.4504021e+01   6.8813555e+00
   2.1901700e+01  -2.3010651e+01   1.5000000e+02   1.0004921e+01  -1.4719048e+01   7.9199532e+00
   2.1767065e+01  -2.3048566e+01   1.5000000e+02   1.0748675e+01  -1.4820005e+01   8.9537640e+00
   2.1635195e+01  -2.3094070e+01   1.5000000e+02   1.1606120e+01  -1.4757696e+01   9.9189425e+00
   2.1506590e+01  -2.3146993e+01   1.5000000e+02   1.2558022e+01  -1.4508790e+01   1.0726988e+01
   2.1381739e+01  -2.3207133e+01   1.5000000e+02   1.3571637e+01  -1.4084015e+01   1.1285292e+01
   2.1261121e+01  -2.3274263e+01   1.5000000e+02   1.4602775e+01  -1.3524569e+01   1.1518573e+01
   2.0628649e+01  -2.3624577e+01   1.5000000e+02   1.8211679e+01  -1.0434024e+01   9.5547447e+00
   2.0542963e+01  -2.3726459e+01   1.5000000e+02   1.8482863e+01  -1.0159842e+01   7.9066408e+00
   2.0463818e+01  -2.3832726e+01   1.5000000e+02   1.8512197e+01  -1.0016411e+01   6.1405903e+00
   2.0391495e+01  -2.3943022e+01   1.5000000e+02   1.8297535e+01  -9.9953866e+00   4.3346451e+00
   2.0326254e+01  -2.4056978e+01   1.5000000e+02   1.7856380e+01  -1.0076313e+01   2.5645105e+00
   2.0268331e+01  -2.4174209e+01   1.5000000e+02   1.7225509e+01  -1.0227452e+01   8.9221102e-01
   2.0217943e+01  -2.4294321e+01   1.5000000e+02   1.6454261e+01  -1.0410168e+01  -6.4429883e-01
   2.0175281e+01  -2.4416908e+01   1.5000000e+02   1.5593083e+01  -1.0586053e+01  -2.0348466e+00
   2.0140511e+01  -2.4541555e+01   1.5000000e+02   1.4681929e+01  -1.0724545e+01  -3.2919584e+00
   2.0113776e+01  -2.4667837e+01   1.5000000e+02   1.3743723e+01  -1.0808528e+01  -4.4388863e+00
   2.0095189e+01  -2.4795325e+01   1.5000000e+02   1.2785459e+01  -1.0836489e+01  -5.4964693e+00
   2.0084841e+01  -2.4923582e+01   1.5000000e+02   1.1805760e+01  -1.0821114e+01  -6.4748594e+00
   2.0082791e+01  -2.5052169e+01   1.5000000e+02   1.0804308e+01  -1.0785346e+01  -7.3733763e+00
   2.0089074e+01  -2.5180644e+01   1.5000000e+02   9.7883193e+00  -1.0757119e+01  -8.1875386e+00
   2.0103693e+01  -2.5308563e+01   1.5000000e+02   8.7731690e+00  -1.0763789e+01  -8.9187831e+00
   2.0126625e+01  -2.5435483e+01   1.5000000e+02   7.7776818e+00  -1.0826642e+01  -9.5819013e+00
   2.0157816e+01  -2.5560964e+01   1.5000000e+02   6.8170752e+00  -1.0955731e+01  -1.0206753e+01
   2.0197183e+01  -2.5684569e+01   1.5000000e+02   5.8969433e+00  -1.1145445e+01  -1.0833918e+01
   2.0244615e+01  -2.5805866e+01   1.5000000e+02   5.0103827e+00  -1.1371848e+01  -1.1506020e+01
   2.0299970e+01  -2.5924428e+01   1.5000000e+02   4.1387740e+00  -1.1592997e+01  -1.2257289e+01
   2.0363078e+01  -2.6039840e+01   1.5000000e+02   3.2555987e+00  -1.1753090e+01  -1.3103867e+01
   2.0433738e+01  -2.6151694e+01   1.5000000e+02   2.3326353e+00  -1.1790299e+01  -1.4036703e+01
   2.0511723e+01  -2.6259594e+01   1.5000000e+02   1.3476316e+00  -1.1647199e+01  -1.5019013e+01
   2.0596777e+01  -2.6363157e+01   1.5000000e+02   2.9226822e-01  -1.1281772e+01  -1.5989972e+01
   2.0688616e+01  -2.6462014e+01   1.5000000e+02  -8.2206207e-01  -1.0676182e+01  -1.6875516e+01
   2.0786929e+01  -2.6555812e+01   1.5000000e+02  -1.9637430e+00  -9.8404042e+00  -1.7604353e+01
   2.0891382e+01  -2.6644216e+01   1.5000000e+02  -3.0873304e+00  -8.8089548e+00  -1.8124128e+01
   2.1001613e+01  -2.6726907e+01   1.5000000e+02  -4.1452474e+00  -7.6316995e+00  -1.8411591e+01
   2.1117239e+01  -2.6803589e+01   1.5000000e+02  -5.1005684e+00  -6.3619643e+00  -1.8473250e+01
   2.1237854e+01  -2.6873984e+01   1.5000000e+02  -5.9357672e+00  -5.0464731e+00  -1.8337338e+01
   2.1363032e+01  -2.6937839e+01   1.5000000e+02  -6.6548484e+00  -3.7198820e+00  -1.8041708e+01
   2.1492327e+01  -2.6994921e+01   1.5000000e+02  -7.2789708e+00  -2.4043777e+00  -1.7623155e+01
   2.1625278e+01  -2.7045024e+01   1.5000000e+02  -7.8384765e+00  -1.1123532e+00  -1.7111349e+01
   2.1761406e+01  -2.7087966e+01   1.5000000e+02  -8.3645421e+00   1.5006097e-01  -1.6527685e+01
   2.1900221e+01  -2.7123590e+01   1.5000000e+02  -8.8830243e+00   1.3801833e+00  -1.5886909e+01
   2.2041219e+01  -2.7151766e+01   1.5000000e+02  -9.4111983e+00   2.5764307e+00  -1.5199361e+01
   2.2183888e+01  -2.7172392e+01   1.5000000e+02  -9.9568624e+00   3.7359130e+00  -1.4472941e+01
   2.2327710e+01  -2.7185392e+01   1.5000000e+02  -1.0518651e+01   4.8519022e+00  -1.3715336e+01
   2.2472160e+01  -2.7190719e+01   1.5000000e+02  -1.1086662e+01   5.9125281e+00  -1.2936934e+01
   2.2616712e+01  -2.7188354e+01   1.5000000e+02  -1.1643150e+01   6.9024426e+00  -1.2153612e+01
   2.2760838e+01  -2.7178304e+01   1.5000000e+02  -1.2163570e+01   7.8076324e+00  -1.1387133e+01
   2.2904013e+01  -2.7160607e+01   1.5000000e+02  -1.2618690e+01   8.6211017e+00  -1.0661042e+01
   2.3045716e+01  -2.7135328e+01   1.5000000e+02  -1.2978231e+01   9.3453537e+00  -9.9933095e+00
   2.3185431e+01  -2.7102558e+01   1.5000000e+02  -1.3215682e+01   9.9895904e+00  -9.3897405e+00
   2.3322653e+01  -2.7062417e+01   1.5000000e+02  -1.3313037e+01   1.0563509e+01  -8.8423625e+00
   2.3456885e+01  -2.7015051e+01   1.5000000e+02  -1.3263859e+01   1.1071949e+01  -8.3336863e+00
   2.3587643e+01  -2.6960633e+01   1.5000000e+02  -1.3073964e+01   1.1513514e+01  -7.8433754e+00
   2.3714460e+01  -2.6899360e+01   1.5000000e+02  -1.2760019e+01   1.1882677e+01  -7.3536280e+00
   2.3836884e+01  -2.6831455e+01   1.5000000e+02  -1.2347016e+01   1.2172869e+01  -6.8516315e+00
   2.3954480e+01  -2.6757162e+01   1.5000000e+02  -1.1865343e+01   1.2378541e+01  -6.3300258e+00
   2.4066835e+01  -2.6676751e+01   1.5000000e+02  -1.1347957e+01   1.2495792e+01  -5.7868027e+00
   2.4173557e+01  -2.6590510e+01   1.5000000e+02  -1.0827722e+01   1.2522496e+01  -5.2258464e+00
   2.4274276e+01  -2.6498750e+01   1.5000000e+02  -1.0335191e+01   1.2458987e+01  -4.6575283e+00
   2.4368646e+01  -2.6401800e+01   1.5000000e+02  -9.8969748e+00   1.2309599e+01  -4.0988353e+00
   2.4456347e+01  -2.6300007e+01   1.5000000e+02  -9.5349764e+00   1.2084364e+01  -3.5726635e+00
   2.4537086e+01  -2.6193732e+01   1.5000000e+02  -9.2660578e+00   1.1799781e+01  -3.1069748e+00
   2.4610595e+01  -2.6083355e+01   1.5000000e+02  -9.1011304e+00   1.1478069e+01  -2.7344828e+00
   2.4676637e+01  -2.5969265e+01   1.5000000e+02  -9.0425705e+00   1.1145000e+01  -2.4924694e+00
   2.4734999e+01  -2.5851867e+01   1.5000000e+02  -9.0801631e+00   1.0826804e+01  -2.4213381e+00
   2.4785500e+01  -2.5731573e+01   1.5000000e+02  -9.1870787e+00   1.0546381e+01  -2.5603341e+00
   2.4827988e+01  -2.5608807e+01   1.5000000e+02  -9.3180991e+00   1.0319322e+01  -2.9403586e+00
   2.4862338e+01  -2.5483997e+01   1.5000000e+02  -9.4120371e+00   1.0150285e+01  -3.5750019e+00
   2.4888458e+01  -2.5357578e+01   1.5000000e+02  -9.3995651e+00   1.0030489e+01  -4.4519696e+00
   2.4906283e+01  -2.5229992e+01   1.5000000e+02  -9.2161888e+00   9.9369900e+00  -5.5287041e+00
   2.4915777e+01  -2.5101678e+01   1.5000000e+02  -8.8173228e+00   9.8341880e+00  -6.7357933e+00
   2.4916933e+01  -2.4973082e+01   1.5000000e+02  -8.1897711e+00   9.6778382e+00  -7.9890073e+00
   2.4909775e+01  -2.4844645e+01   1.5000000e+02  -7.3539625e+00   9.4212064e+00  -9.2066718e+00
   2.4894352e+01  -2.4716810e+01   1.5000000e+02  -6.3554717e+00   9.0222447e+00  -1.0325040e+01
   2.4870742e+01  -2.4590012e+01   1.5000000e+02  -5.2495436e+00   8.4500258e+00  -1.1305465e+01
   2.4839050e+01  -2.4464685e+01   1.5000000e+02  -4.0858260e+00   7.6890667e+00  -1.2131317e+01
   2.4799409e+01  -2.4341255e+01   1.5000000e+02  -2.8993860e+00   6.7408191e+00  -1.2797864e+01
   2.4751974e+01  -2.4220141e+01   1.5000000e+02  -1.7106674e+00   5.6226508e+00  -1.3301098e+01
   2.4696929e+01  -2.4101753e+01   1.5000000e+02  -5.3248581e-01   4.3650549e+00  -1.3631128e+01
   2.4634479e+01  -2.3986490e+01   1.5000000e+02   6.2112277e-01   3.0076092e+00  -1.3773168e+01
   2.4564853e+01  -2.3874741e+01   1.5000000e+02   1.7293615e+00   1.5941317e+00  -1.3714393e+01
   2.4488303e+01  -2.3766879e+01   1.5000000e+02   2.7653652e+00   1.6727075e-01  -1.3452101e+01
   2.4405102e+01  -2.3663268e+01   1.5000000e+02   3.7018677e+00  -1.2364965e+00  -1.2998203e+01
   2.4315542e+01  -2.3564252e+01   1.5000000e+02   4.5181050e+00  -2.5905970e+00  -1.2377548e+01
   2.4219935e+01  -2.3470163e+01   1.5000000e+02   5.2040466e+00  -3.8796101e+00  -1.1621580e+01
   2.4118612e+01  -2.3381312e+01   1.5000000e+02   5.7606500e+00  -5.0981573e+00  -1.0760454e+01
   2.4011919e+01  -2.3297997e+01   1.5000000e+02   6.1969590e+00  -6.2476544e+00  -9.8169740e+00
   2.3900219e+01  -2.3220492e+01   1.5000000e+02   6.5259908e+00  -7.3319777e+00  -8.8038767e+00
   2.3783890e+01  -2.3149056e+01   1.5000000e+02   6.7612851e+00  -8.3530041e+00  -7.7250813e+00
   2.3663323e+01  -2.3083923e+01   1.5000000e+02   6.9151446e+00  -9.3074494e+00  -6.5799087e+00
   2.3538921e+01  -2.3025309e+01   1.5000000e+02   6.9988573e+00  -1.0185889e+01  -5.3689616e+00
   2.3411099e+01  -2.2973408e+01   1.5000000e+02   7.0242736e+00  -1.0974537e+01  -4.0994642e+00
   2.3280279e+01  -2.2928390e+01   1.5000000e+02   7.0056693e+00  -1.1659359e+01  -2.7883029e+00
   2.3146896e+01  -2.2890403e+01   1.5000000e+02   6.9608045e+00  -1.2231390e+01  -1.4618255e+00
   2.3011388e+01  -2.2859574e+01   1.5000000e+02   6.9106600e+00  -1.2691905e+01  -1.5194904e-01
   2.2874203e+01  -2.2836002e+01   1.5000000e+02   6.8778640e+00  -1.3055549e+01   1.1105531e+00
   2.2735790e+01  -2.2819766e+01   1.5000000e+02   6.8846103e+00  -1.3349853e+01   2.3041458e+00
   2.2596604e+01  -2.2810919e+01   1.5000000e+02   6.9506144e+00  -1.3610226e+01   3.4234933e+00
   2.2457102e+01  -2.2809489e+01   1.5000000e+02   7.0919576e+00  -1.3871014e+01   4.4827561e+00
   2.2317740e+01  -2.2815482e+01   1.5000000e+02   7.3211529e+00  -1.4154713e+01   5.5131881e+00
   2.2178975e+01  -2.2828878e+01   1.5000000e+02   7.6481771e+00  -1.4462477e+01   6.5543835e+00
   2.2041264e+01  -2.2849633e+01   1.5000000e+02   8.0818434e+00  -1.4769546e+01   7.6404163e+00
   2.1905057e+01  -2.2877679e+01   1.5000000e+02   8.6303565e+00  -1.5028355e+01   8.7843906e+00
   2.1770803e+01  -2.2912923e+01   1.5000000e+02   9.3000727e+00  -1.5179791e+01   9.9663310e+00
   2.1638945e+01  -2.2955249e+01   1.5000000e+02   1.0092348e+01  -1.5169937e+01   1.1129625e+01
   2.1509917e+01  -2.3004519e+01   1.5000000e+02   1.0999387e+01  -1.4966815e+01   1.2188604e+01
   2.1384148e+01  -2.3060570e+01   1.5000000e+02   1.2000952e+01  -1.4570864e+01   1.3045684e+01
   2.1262056e+01  -2.3123216e+01   1.5000000e+02   1.3063946e+01  -1.4015069e+01   1.3612356e+01
   2.1144048e+01  -2.3192253e+01   1.5000000e+02   1.4145374e+01  -1.3355200e+01   1.3826179e+01
   2.1030521e+01  -2.3267450e+01   1.5000000e+02   1.5197288e+01  -1.2655152e+01   1.3658639e+01
   2.0921856e+01  -2.3348559e+01   1.5000000e+02   1.6171919e+01  -1.1973643e+01   1.3113035e+01
   2.0818423e+01  -2.3435312e+01   1.5000000e+02   1.7024864e+01  -1.1356779e+01   1.2216635e+01
   2.0720575e+01  -2.3527420e+01   1.5000000e+02   1.7716338e+01  -1.0836736e+01   1.1012553e+01
   2.0199822e+01  -2.4001405e+01   1.5000000e+02   1.7881313e+01  -9.9335555e+00   4.2768027e+00
   2.0141510e+01  -2.4118786e+01   1.5000000e+02   1.7318828e+01  -1.0164131e+01   2.5795213e+00
   2.0090327e+01  -2.4238925e+01   1.5000000e+02   1.6617703e+01  -1.0422571e+01   1.0154715e+00
   2.0046449e+01  -2.4361457e+01   1.5000000e+02   1.5827880e+01  -1.0669567e+01  -4.0993979e-01
   2.0010028e+01  -2.4486012e+01   1.5000000e+02   1.4987716e+01  -1.0873674e+01  -1.7141948e+00
   1.9981199e+01  -2.4612209e+01   1.5000000e+02   1.4116710e+01  -1.1016049e+01  -2.9248959e+00
   1.9960072e+01  -2.4739664e+01   1.5000000e+02   1.3216089e+01  -1.1092025e+01  -4.0652518e+00
   1.9946734e+01  -2.4867988e+01   1.5000000e+02   1.2276715e+01  -1.1109742e+01  -5.1438940e+00
   1.9941251e+01  -2.4996785e+01   1.5000000e+02   1.1290170e+01  -1.1086976e+01  -6.1530727e+00
   1.9943665e+01  -2.5125660e+01   1.5000000e+02   1.0257675e+01  -1.1047387e+01  -7.0752002e+00
   1.9953993e+01  -2.5254214e+01   1.5000000e+02   9.1933330e+00  -1.1016923e+01  -7.8938768e+00
   1.9972227e+01  -2.5382048e+01   1.5000000e+02   8.1210194e+00  -1.1020374e+01  -8.6044021e+00
   1.9998337e+01  -2.5508767e+01   1.5000000e+02   7.0673830e+00  -1.1077631e+01  -9.2197262e+00
   2.0032267e+01  -2.5633974e+01   1.5000000e+02   6.0543781e+00  -1.1199420e+01  -9.7704245e+00
   2.0073934e+01  -2.5757277e+01   1.5000000e+02   5.0935835e+00  -1.1382925e+01  -1.0299676e+01
   2.0123232e+01  -2.5878290e+01   1.5000000e+02   4.1834693e+00  -1.1608549e+01  -1.0854886e+01
   2.0180029e+01  -2.5996631e+01   1.5000000e+02   3.3095961e+00  -1.1839308e+01  -1.1477680e+01
   2.0244169e+01  -2.6111927e+01   1.5000000e+02   2.4474777e+00  -1.2023893e+01  -1.2193982e+01
   2.0315471e+01  -2.6223812e+01   1.5000000e+02   1.5681120e+00  -1.2103447e+01  -1.3005892e+01
   2.0393729e+01  -2.6331930e+01   1.5000000e+02   6.4575703e-01  -1.2021142e+01  -1.3887607e+01
   2.0478713e+01  -2.6435937e+01   1.5000000e+02  -3.3335868e-01  -1.1732678e+01  -1.4787661e+01
   2.0570170e+01  -2.6535500e+01   1.5000000e+02  -1.3641525e+00  -1.1215101e+01  -1.5638485e+01
   2.0667823e+01  -2.6630299e+01   1.5000000e+02  -2.4209664e+00  -1.0471113e+01  -1.6371485e+01
   2.0771375e+01  -2.6720030e+01   1.5000000e+02  -3.4627793e+00  -9.5270119e+00  -1.6932859e+01
   2.0880505e+01  -2.6804403e+01   1.5000000e+02  -4.4439726e+00  -8.4248382e+00  -1.7294145e+01
   2.0994874e+01  -2.6883145e+01   1.5000000e+02  -5.3267513e+00  -7.2115495e+00  -1.7453929e+01
   2.1114122e+01  -2.6956002e+01   1.5000000e+02  -6.0904619e+00  -5.9294628e+00  -1.7430994e+01
   2.1237872e+01  -2.7022735e+01   1.5000000e+02  -6.7348736e+00  -4.6109638e+00  -1.7253229e+01
   2.1365730e+01  -2.7083129e+01   1.5000000e+02  -7.2773638e+00  -3.2781747e+00  -1.6947404e+01
   2.1497286e+01  -2.7136986e+01   1.5000000e+02  -7.7460518e+00  -1.9459070e+00  -1.6533680e+01
   2.1632116e+01  -2.7184130e+01   1.5000000e+02  -8.1721248e+00  -6.2512346e-01  -1.6025207e+01
   2.1769783e+01  -2.7224407e+01   1.5000000e+02  -8.5837646e+00   6.7490899e-01  -1.5430850e+01
   2.1909840e+01  -2.7257685e+01   1.5000000e+02  -9.0028026e+00   1.9459290e+00  -1.4758189e+01
   2.2051831e+01  -2.7283854e+01   1.5000000e+02  -9.4437711e+00   3.1801743e+00  -1.4015165e+01
   2.2195291e+01  -2.7302829e+01   1.5000000e+02  -9.9142224e+00   4.3689223e+00  -1.3210676e+01
   2.2339751e+01  -2.7314548e+01   1.5000000e+02  -1.0415191e+01   5.5003222e+00  -1.2355609e+01
   2.2484736e+01  -2.7318972e+01   1.5000000e+02  -1.0941129e+01   6.5582157e+00  -1.1465217e+01
   2.2629772e+01  -2.7316086e+01   1.5000000e+02  -1.1479398e+01   7.5241254e+00  -1.0561807e+01
   2.2774382e+01  -2.7305899e+01   1.5000000e+02  -1.2009864e+01   8.3826245e+00  -9.6751472e+00
   2.2918092e+01  -2.7288447e+01   1.5000000e+02  -1.2505621e+01   9.1277085e+00  -8.8380872e+00
   2.3060430e+01  -2.7263784e+01   1.5000000e+02  -1.2935607e+01   9.7657401e+00  -8.0783331e+00
   2.3200932e+01  -2.7231994e+01   1.5000000e+02  -1.3269128e+01   1.0312587e+01  -7.4101434e+00
   2.3339140e+01  -2.7193180e+01   1.5000000e+02  -1.3481151e+01   1.0786359e+01  -6.8314301e+00
   2.3474603e+01  -2.7147468e+01   1.5000000e+02  -1.3556505e+01   1.1200569e+01  -6.3270368e+00
   2.3606883e+01  -2.7095010e+01   1.5000000e+02  -1.3491763e+01   1.1561271e+01  -5.8754029e+00
   2.3735554e+01  -2.7035976e+01   1.5000000e+02  -1.3294735e+01   1.1868226e+01  -5.4546600e+00
   2.3860202e+01  -2.6970559e+01   1.5000000e+02  -1.2982512e+01   1.2117672e+01  -5.0457205e+00
   2.3980429e+01  -2.6898972e+01   1.5000000e+02  -1.2578991e+01   1.2304385e+01  -4.6333289e+00
   2.4095855e+01  -2.6821447e+01   1.5000000e+02  -1.2112366e+01   1.2422453e+01  -4.2066931e+00
   2.4206117e+01  -2.6738237e+01   1.5000000e+02  -1.1612714e+01   1.2465556e+01  -3.7606840e+00
   2.4310869e+01  -2.6649610e+01   1.5000000e+02  -1.1109528e+01   1.2427889e+01  -3.2973631e+00
   2.4409789e+01  -2.6555852e+01   1.5000000e+02  -1.0629500e+01   1.2306186e+01  -2.8264839e+00
   2.4502573e+01  -2.6457265e+01   1.5000000e+02  -1.0194999e+01   1.2102310e+01  -2.3644961e+00
   2.4588941e+01  -2.6354166e+01   1.5000000e+02  -9.8237833e+00   1.1825176e+01  -1.9321557e+00
   2.4668634e+01  -2.6246885e+01   1.5000000e+02  -9.5296492e+00   1.1491080e+01  -1.5525867e+00
   2.4741417e+01  -2.6135763e+01   1.5000000e+02  -9.3227176e+00   1.1122413e+01  -1.2509293e+00
   2.4807080e+01  -2.6021155e+01   1.5000000e+02  -9.2080142e+00   1.0745417e+01  -1.0552808e+00
   2.4865436e+01  -2.5903424e+01   1.5000000e+02  -9.1820560e+00   1.0387436e+01  -9.9715651e-01
   2.4916324e+01  -2.5782941e+01   1.5000000e+02  -9.2287140e+00   1.0073698e+01  -1.1095165e+00
   2.4959606e+01  -2.5660088e+01   1.5000000e+02  -9.3162583e+00   9.8237026e+00  -1.4218059e+00
   2.4995171e+01  -2.5535249e+01   1.5000000e+02  -9.3975002e+00   9.6475289e+00  -1.9525518e+00
   2.5022932e+01  -2.5408816e+01   1.5000000e+02  -9.4145371e+00   9.5427992e+00  -2.7012118e+00
   2.5042827e+01  -2.5281183e+01   1.5000000e+02  -9.3086604e+00   9.4929426e+00  -3.6423325e+00
   2.5054820e+01  -2.5152747e+01   1.5000000e+02  -9.0336348e+00   9.4674562e+00  -4.7256697e+00
   2.5058898e+01  -2.5023907e+01   1.5000000e+02  -8.5676341e+00   9.4246882e+00  -5.8844695e+00
   2.5055074e+01  -2.4895061e+01   1.5000000e+02  -7.9181513e+00   9.3170701e+00  -7.0498040e+00
   2.5043384e+01  -2.4766605e+01   1.5000000e+02  -7.1170242e+00   9.0979360e+00  -8.1651404e+00
   2.5023889e+01  -2.4638934e+01   1.5000000e+02  -6.2077362e+00   8.7283246e+00  -9.1946600e+00
   2.4996672e+01  -2.4512440e+01   1.5000000e+02  -5.2308715e+00   8.1822101e+00  -1.0122368e+01
   2.4961839e+01  -2.4387508e+01   1.5000000e+02  -4.2140680e+00   7.4492076e+00  -1.0943423e+01
   2.4919517e+01  -2.4264519e+01   1.5000000e+02  -3.1701615e+00   6.5347934e+00  -1.1652719e+01
   2.4869858e+01  -2.4143846e+01   1.5000000e+02  -2.1030812e+00   5.4585976e+00  -1.2236442e+01
   2.4813030e+01  -2.4025855e+01   1.5000000e+02  -1.0176046e+00   4.2514863e+00  -1.2670692e+01
   2.4749225e+01  -2.3910902e+01   1.5000000e+02   7.2252858e-02   2.9518395e+00  -1.2927307e+01
   2.4678653e+01  -2.3799333e+01   1.5000000e+02   1.1406486e+00   1.6011347e+00  -1.2983937e+01
   2.4601542e+01  -2.3691484e+01   1.5000000e+02   2.1540051e+00   2.3916809e-01  -1.2832901e+01
   2.4518139e+01  -2.3587677e+01   1.5000000e+02   3.0791509e+00  -1.1003733e+00  -1.2484542e+01
   2.4428707e+01  -2.3488223e+01   1.5000000e+02   3.8910785e+00  -2.3929466e+00  -1.1964091e+01
   2.4333526e+01  -2.3393420e+01   1.5000000e+02   4.5769742e+00  -3.6242157e+00  -1.1304259e+01
   2.4232891e+01  -2.3303550e+01   1.5000000e+02   5.1358379e+00  -4.7891237e+00  -1.0537069e+01
   2.4127110e+01  -2.3218880e+01   1.5000000e+02   5.5750662e+00  -5.8893729e+00  -9.6876563e+00
   2.4016507e+01  -2.3139661e+01   1.5000000e+02   5.9060503e+00  -6.9299246e+00  -8.7712662e+00
   2.3901417e+01  -2.3066128e+01   1.5000000e+02   6.1405443e+00  -7.9152645e+00  -7.7935772e+00
   2.3782186e+01  -2.2998499e+01   1.5000000e+02   6.2887550e+00  -8.8461874e+00  -6.7538539e+00
   2.3659173e+01  -2.2936974e+01   1.5000000e+02   6.3594788e+00  -9.7179908e+00  -5.6498605e+00
   2.3532744e+01  -2.2881734e+01   1.5000000e+02   6.3618549e+00  -1.0520740e+01  -4.4829361e+00
   2.3403276e+01  -2.2832943e+01   1.5000000e+02   6.3076265e+00  -1.1241531e+01  -3.2618148e+00
   2.3271152e+01  -2.2790743e+01   1.5000000e+02   6.2126759e+00  -1.1868397e+01  -2.0039974e+00
   2.3136763e+01  -2.2755261e+01   1.5000000e+02   6.0970980e+00  -1.2394900e+01  -7.3448015e-01
   2.3000505e+01  -2.2726598e+01   1.5000000e+02   5.9836462e+00  -1.2824424e+01   5.1835562e-01
   2.2862778e+01  -2.2704841e+01   1.5000000e+02   5.8953905e+00  -1.3172560e+01   1.7289304e+00
   2.2723987e+01  -2.2690053e+01   1.5000000e+02   5.8531734e+00  -1.3466153e+01   2.8816010e+00
   2.2584540e+01  -2.2682277e+01   1.5000000e+02   5.8738770e+00  -1.3738278e+01   3.9765448e+00
   2.2444845e+01  -2.2681537e+01   1.5000000e+02   5.9699096e+00  -1.4019821e+01   5.0322227e+00
   2.2305312e+01  -2.2687833e+01   1.5000000e+02   6.1499973e+00  -1.4329556e+01   6.0827328e+00
   2.2166349e+01  -2.2701149e+01   1.5000000e+02   6.4211184e+00  -1.4665556e+01   7.1695273e+00
   2.2028364e+01  -2.2721445e+01   1.5000000e+02   6.7905135e+00  -1.5001063e+01   8.3284985e+00
   2.1891764e+01  -2.2748660e+01   1.5000000e+02   7.2669269e+00  -1.5287290e+01   9.5753431e+00
   2.1756948e+01  -2.2782716e+01   1.5000000e+02   7.8600143e+00  -1.5463752e+01   1.0893703e+01
   2.1624315e+01  -2.2823512e+01   1.5000000e+02   8.5773736e+00  -1.5473922e+01   1.2230490e+01
   2.1494256e+01  -2.2870928e+01   1.5000000e+02   9.4201212e+00  -1.5281596e+01   1.3501462e+01
   2.1367156e+01  -2.2924823e+01   1.5000000e+02   1.0378520e+01  -1.4882237e+01   1.4606252e+01
   2.1243394e+01  -2.2985041e+01   1.5000000e+02   1.1429857e+01  -1.4304934e+01   1.5448346e+01
   2.1123337e+01  -2.3051401e+01   1.5000000e+02   1.2539444e+01  -1.3604443e+01   1.5953300e+01
   2.1007347e+01  -2.3123709e+01   1.5000000e+02   1.3664653e+01  -1.2847048e+01   1.6078714e+01
   2.0895771e+01  -2.3201751e+01   1.5000000e+02   1.4759708e+01  -1.2096313e+01   1.5814782e+01
   2.0788949e+01  -2.3285295e+01   1.5000000e+02   1.5779535e+01  -1.1403826e+01   1.5177553e+01
   2.0687205e+01  -2.3374093e+01   1.5000000e+02   1.6681747e+01  -1.0806367e+01   1.4200351e+01
   2.0590851e+01  -2.3467881e+01   1.5000000e+02   1.7427198e+01  -1.0327882e+01   1.2927498e+01
   2.0500185e+01  -2.3566380e+01   1.5000000e+02   1.7980644e+01  -9.9827832e+00   1.1412048e+01
   2.0415492e+01  -2.3669296e+01   1.5000000e+02   1.8312968e+01  -9.7777830e+00   9.7161832e+00
   2.0337036e+01  -2.3776322e+01   1.5000000e+02   1.8405562e+01  -9.7112472e+00   7.9111424e+00
   2.0265068e+01  -2.3887135e+01   1.5000000e+02   1.8255850e+01  -9.7711264e+00   6.0735679e+00
   1.9872619e+01  -2.4456908e+01   1.5000000e+02   1.4999357e+01  -1.0931394e+01  -2.3094059e-01
   1.9843646e+01  -2.4582259e+01   1.5000000e+02   1.4215141e+01  -1.1128892e+01  -1.4626214e+00
   1.9821870e+01  -2.4708814e+01   1.5000000e+02   1.3394709e+01  -1.1257106e+01  -2.6490861e+00
   1.9807371e+01  -2.4836229e+01   1.5000000e+02   1.2521916e+01  -1.1321829e+01  -3.7965785e+00
   1.9800211e+01  -2.4964157e+01   1.5000000e+02   1.1581765e+01  -1.1336025e+01  -4.8920697e+00
   1.9800432e+01  -2.5092250e+01   1.5000000e+02   1.0570036e+01  -1.1317240e+01  -5.9093964e+00
   1.9808056e+01  -2.5220157e+01   1.5000000e+02   9.4975680e+00  -1.1285774e+01  -6.8201634e+00
   1.9823087e+01  -2.5347527e+01   1.5000000e+02   8.3883751e+00  -1.1263306e+01  -7.6048353e+00
   1.9845505e+01  -2.5474009e+01   1.5000000e+02   7.2736365e+00  -1.1271182e+01  -8.2602155e+00
   1.9875274e+01  -2.5599254e+01   1.5000000e+02   6.1844850e+00  -1.1327572e+01  -8.8021325e+00
   1.9912332e+01  -2.5722915e+01   1.5000000e+02   5.1458240e+00  -1.1443410e+01  -9.2636433e+00
   1.9956600e+01  -2.5844648e+01   1.5000000e+02   4.1719755e+00  -1.1617861e+01  -9.6900932e+00
   2.0007978e+01  -2.5964113e+01   1.5000000e+02   3.2642246e+00  -1.1834782e+01  -1.0131662e+01
   2.0066343e+01  -2.6080976e+01   1.5000000e+02   2.4103983e+00  -1.2061697e+01  -1.0634166e+01
   2.0131552e+01  -2.6194910e+01   1.5000000e+02   1.5870063e+00  -1.2252260e+01  -1.1229280e+01
   2.0203442e+01  -2.6305592e+01   1.5000000e+02   7.6442751e-01  -1.2352242e+01  -1.1926083e+01
   2.0281830e+01  -2.6412711e+01   1.5000000e+02  -8.5253461e-02  -1.2308226e+01  -1.2706512e+01
   2.0366512e+01  -2.6515963e+01   1.5000000e+02  -9.7922882e-01  -1.2077219e+01  -1.3527101e+01
   2.0457264e+01  -2.6615054e+01   1.5000000e+02  -1.9169083e+00  -1.1634852e+01  -1.4327782e+01
   2.0553845e+01  -2.6709702e+01   1.5000000e+02  -2.8778505e+00  -1.0979557e+01  -1.5045808e+01
   2.0655992e+01  -2.6799637e+01   1.5000000e+02  -3.8261157e+00  -1.0131167e+01  -1.5630161e+01
   2.0763428e+01  -2.6884600e+01   1.5000000e+02  -4.7198209e+00  -9.1241425e+00  -1.6051492e+01
   2.0875855e+01  -2.6964348e+01   1.5000000e+02  -5.5223936e+00  -7.9980351e+00  -1.6303947e+01
   2.0992960e+01  -2.7038650e+01   1.5000000e+02  -6.2114588e+00  -6.7887034e+00  -1.6399448e+01
   2.1114417e+01  -2.7107293e+01   1.5000000e+02  -6.7827828e+00  -5.5233441e+00  -1.6357612e+01
   2.1239880e+01  -2.7170077e+01   1.5000000e+02  -7.2487301e+00  -4.2204409e+00  -1.6196235e+01
   2.1368996e+01  -2.7226821e+01   1.5000000e+02  -7.6330041e+00  -2.8929488e+00  -1.5926000e+01
   2.1501393e+01  -2.7277360e+01   1.5000000e+02  -7.9640001e+00  -1.5524790e+00  -1.5550445e+01
   2.1636693e+01  -2.7321546e+01   1.5000000e+02  -8.2692282e+00  -2.1159763e-01  -1.5069619e+01
   2.1774505e+01  -2.7359252e+01   1.5000000e+02  -8.5719569e+00   1.1161125e+00  -1.4484356e+01
   2.1914431e+01  -2.7390367e+01   1.5000000e+02  -8.8902053e+00   2.4174022e+00  -1.3798782e+01
   2.2056064e+01  -2.7414799e+01   1.5000000e+02  -9.2371748e+00   3.6800152e+00  -1.3020397e+01
   2.2198993e+01  -2.7432479e+01   1.5000000e+02  -9.6219445e+00   4.8915740e+00  -1.2159073e+01
   2.2342800e+01  -2.7443353e+01   1.5000000e+02  -1.0049520e+01   6.0371076e+00  -1.1227204e+01
   2.2487067e+01  -2.7447391e+01   1.5000000e+02  -1.0519911e+01   7.0976236e+00  -1.0241762e+01
   2.2631371e+01  -2.7444580e+01   1.5000000e+02  -1.1026566e+01   8.0517464e+00  -9.2275327e+00
   2.2775291e+01  -2.7434929e+01   1.5000000e+02  -1.1554887e+01   8.8812710e+00  -8.2183170e+00
   2.2918408e+01  -2.7418466e+01   1.5000000e+02  -1.2081803e+01   9.5781064e+00  -7.2535676e+00
   2.3060304e+01  -2.7395238e+01   1.5000000e+02  -1.2577313e+01   1.0148464e+01  -6.3702774e+00
   2.3200566e+01  -2.7365315e+01   1.5000000e+02  -1.3008353e+01   1.0611172e+01  -5.5936483e+00
   2.3338786e+01  -2.7328783e+01   1.5000000e+02  -1.3344213e+01   1.0990702e+01  -4.9318298e+00
   2.3474565e+01  -2.7285749e+01   1.5000000e+02  -1.3561654e+01   1.1309195e+01  -4.3768969e+00
   2.3607511e+01  -2.7236338e+01   1.5000000e+02  -1.3648017e+01   1.1581564e+01  -3.9105829e+00
   2.3737242e+01  -2.7180694e+01   1.5000000e+02  -1.3601765e+01   1.1814944e+01  -3.5104695e+00
   2.3863387e+01  -2.7118979e+01   1.5000000e+02  -1.3431126e+01   1.2010575e+01  -3.1540028e+00
   2.3985587e+01  -2.7051372e+01   1.5000000e+02  -1.3151991e+01   1.2165760e+01  -2.8202909e+00
   2.4103496e+01  -2.6978068e+01   1.5000000e+02  -1.2785804e+01   1.2274828e+01  -2.4912132e+00
   2.4216785e+01  -2.6899280e+01   1.5000000e+02  -1.2357646e+01   1.2329572e+01  -2.1529932e+00
   2.4325137e+01  -2.6815234e+01   1.5000000e+02  -1.1894278e+01   1.2320118e+01  -1.7985279e+00
   2.4428253e+01  -2.6726171e+01   1.5000000e+02  -1.1421922e+01   1.2236891e+01  -1.4291239e+00
   2.4525851e+01  -2.6632348e+01   1.5000000e+02  -1.0963969e+01   1.2073549e+01  -1.0545934e+00
   2.4617666e+01  -2.6534033e+01   1.5000000e+02  -1.0539302e+01   1.1829894e+01  -6.9101479e-01
   2.4703453e+01  -2.6431505e+01   1.5000000e+02  -1.0162089e+01   1.1513465e+01  -3.5698274e-01
   2.4782984e+01  -2.6325057e+01   1.5000000e+02  -9.8429762e+00   1.1139320e+01  -7.0609658e-02
   2.4856053e+01  -2.6214991e+01   1.5000000e+02  -9.5904492e+00   1.0728438e+01   1.5114888e-01
   2.4922472e+01  -2.6101616e+01   1.5000000e+02  -9.4108802e+00   1.0305723e+01   2.9087893e-01
   2.4982074e+01  -2.5985254e+01   1.5000000e+02  -9.3065561e+00   9.8979642e+00   3.2870995e-01
   2.5034713e+01  -2.5866231e+01   1.5000000e+02  -9.2722071e+00   9.5315435e+00   2.4170779e-01
   2.5080263e+01  -2.5744879e+01   1.5000000e+02  -9.2914962e+00   9.2295962e+00   5.8833344e-03
   2.5118620e+01  -2.5621539e+01   1.5000000e+02  -9.3350099e+00   9.0086586e+00  -3.9911906e-01
   2.5149700e+01  -2.5496552e+01   1.5000000e+02  -9.3612994e+00   8.8753405e+00  -9.8354894e-01
   2.5173439e+01  -2.5370266e+01   1.5000000e+02  -9.3222220e+00   8.8236644e+00  -1.7409610e+00
   2.5189795e+01  -2.5243029e+01   1.5000000e+02  -9.1725346e+00   8.8337847e+00  -2.6447381e+00
   2.5198747e+01  -2.5115193e+01   1.5000000e+02  -8.8811466e+00   8.8728054e+00  -3.6506286e+00
   2.5200293e+01  -2.4987107e+01   1.5000000e+02  -8.4392418e+00   8.8980679e+00  -4.7059840e+00
   2.5194453e+01  -2.4859124e+01   1.5000000e+02  -7.8610146e+00   8.8625287e+00  -5.7621548e+00
   2.5181265e+01  -2.4731592e+01   1.5000000e+02  -7.1761262e+00   8.7211841e+00  -6.7847971e+00
   2.5160787e+01  -2.4604858e+01   1.5000000e+02  -6.4173478e+00   8.4370038e+00  -7.7571139e+00
   2.5133098e+01  -2.4479266e+01   1.5000000e+02  -5.6089731e+00   7.9852063e+00  -8.6751767e+00
   2.5098292e+01  -2.4355155e+01   1.5000000e+02  -4.7608700e+00   7.3552990e+00  -9.5380400e+00
   2.5056485e+01  -2.4232861e+01   1.5000000e+02  -3.8702808e+00   6.5510202e+00  -1.0337249e+01
   2.5007809e+01  -2.4112712e+01   1.5000000e+02  -2.9298268e+00   5.5887553e+00  -1.1050822e+01
   2.4952412e+01  -2.3995031e+01   1.5000000e+02  -1.9379079e+00   4.4950832e+00  -1.1644199e+01
   2.4890461e+01  -2.3880133e+01   1.5000000e+02  -9.0660885e-01   3.3037074e+00  -1.2077961e+01
   2.4822137e+01  -2.3768323e+01   1.5000000e+02   1.3655776e-01   2.0518198e+00  -1.2319051e+01
   2.4747639e+01  -2.3659901e+01   1.5000000e+02   1.1535755e+00   7.7616082e-01  -1.2350438e+01
   2.4667178e+01  -2.3555153e+01   1.5000000e+02   2.1050718e+00  -4.9091799e-01  -1.2175240e+01
   2.4580981e+01  -2.3454357e+01   1.5000000e+02   2.9590509e+00  -1.7242452e+00  -1.1814199e+01
   2.4489288e+01  -2.3357781e+01   1.5000000e+02   3.6960214e+00  -2.9071749e+00  -1.1298666e+01
   2.4392353e+01  -2.3265678e+01   1.5000000e+02   4.3094568e+00  -4.0313496e+00  -1.0662402e+01
   2.4290440e+01  -2.3178292e+01   1.5000000e+02   4.8028359e+00  -5.0952256e+00  -9.9349469e+00
   2.4183827e+01  -2.3095853e+01   1.5000000e+02   5.1852028e+00  -6.1018758e+00  -9.1376106e+00
   2.4072800e+01  -2.3018576e+01   1.5000000e+02   5.4670128e+00  -7.0564043e+00  -8.2822544e+00
   2.3957657e+01  -2.2946665e+01   1.5000000e+02   5.6573219e+00  -7.9632228e+00  -7.3725853e+00
   2.3838706e+01  -2.2880307e+01   1.5000000e+02   5.7629517e+00  -8.8238218e+00  -6.4072352e+00
   2.3716262e+01  -2.2819677e+01   1.5000000e+02   5.7896176e+00  -9.6354690e+00  -5.3838180e+00
   2.3590649e+01  -2.2764933e+01   1.5000000e+02   5.7442830e+00  -1.0391231e+01  -4.3027563e+00
   2.3462196e+01  -2.2716217e+01   1.5000000e+02   5.6376235e+00  -1.1081346e+01  -3.1699607e+00
   2.3331240e+01  -2.2673656e+01   1.5000000e+02   5.4853800e+00  -1.1695686e+01  -1.9979579e+00
   2.3198125e+01  -2.2637362e+01   1.5000000e+02   5.3079869e+00  -1.2227060e+01  -8.0532535e-01
   2.3063198e+01  -2.2607429e+01   1.5000000e+02   5.1286113e+00  -1.2674868e+01   3.8565905e-01
   2.2926808e+01  -2.2583934e+01   1.5000000e+02   4.9703944e+00  -1.3048023e+01   1.5531651e+00
   2.2789312e+01  -2.2566939e+01   1.5000000e+02   4.8537913e+00  -1.3365704e+01   2.6812992e+00
   2.2651066e+01  -2.2556488e+01   1.5000000e+02   4.7946877e+00  -1.3654825e+01   3.7657919e+00
   2.2512428e+01  -2.2552608e+01   1.5000000e+02   4.8037843e+00  -1.3944078e+01   4.8177478e+00
   2.2373758e+01  -2.2555309e+01   1.5000000e+02   4.8873319e+00  -1.4255708e+01   5.8638587e+00
   2.2235415e+01  -2.2564584e+01   1.5000000e+02   5.0490294e+00  -1.4597057e+01   6.9419995e+00
   2.2097758e+01  -2.2580409e+01   1.5000000e+02   5.2925508e+00  -1.4954384e+01   8.0921203e+00
   2.1961144e+01  -2.2602743e+01   1.5000000e+02   5.6238670e+00  -1.5291528e+01   9.3438989e+00
   2.1825929e+01  -2.2631528e+01   1.5000000e+02   6.0523638e+00  -1.5554965e+01   1.0704054e+01
   2.1692463e+01  -2.2666689e+01   1.5000000e+02   6.5899439e+00  -1.5685001e+01   1.2147276e+01
   2.1561096e+01  -2.2708134e+01   1.5000000e+02   7.2478928e+00  -1.5630565e+01   1.3614136e+01
   2.1432169e+01  -2.2755756e+01   1.5000000e+02   8.0323053e+00  -1.5363375e+01   1.5018080e+01
   2.1306022e+01  -2.2809431e+01   1.5000000e+02   8.9395828e+00  -1.4886672e+01   1.6260023e+01
   2.1182986e+01  -2.2869017e+01   1.5000000e+02   9.9539173e+00  -1.4235240e+01   1.7246698e+01
   2.1063386e+01  -2.2934361e+01   1.5000000e+02   1.1047871e+01  -1.3466767e+01   1.7906325e+01
   2.0947538e+01  -2.3005290e+01   1.5000000e+02   1.2185329e+01  -1.2648215e+01   1.8197137e+01
   2.0835752e+01  -2.3081620e+01   1.5000000e+02   1.3325714e+01  -1.1842626e+01   1.8107015e+01
   2.0728326e+01  -2.3163150e+01   1.5000000e+02   1.4427300e+01  -1.1100659e+01   1.7647238e+01
   2.0625550e+01  -2.3249666e+01   1.5000000e+02   1.5449098e+01  -1.0458272e+01   1.6844418e+01
   2.0527703e+01  -2.3340941e+01   1.5000000e+02   1.6351462e+01  -9.9388471e+00   1.5734745e+01
   2.0435052e+01  -2.3436734e+01   1.5000000e+02   1.7096582e+01  -9.5567709e+00   1.4361986e+01
   2.0347853e+01  -2.3536793e+01   1.5000000e+02   1.7650158e+01  -9.3198103e+00   1.2778206e+01
   2.0266347e+01  -2.3640853e+01   1.5000000e+02   1.7984872e+01  -9.2290831e+00   1.1044970e+01
   2.0190764e+01  -2.3748638e+01   1.5000000e+02   1.8085485e+01  -9.2772260e+00   9.2320425e+00
   2.0121319e+01  -2.3859862e+01   1.5000000e+02   1.7953954e+01  -9.4463678e+00   7.4119475e+00
   2.0058212e+01  -2.3974230e+01   1.5000000e+02   1.7612071e+01  -9.7078525e+00   5.6504795e+00
   2.0001628e+01  -2.4091435e+01   1.5000000e+02   1.7099175e+01  -1.0024802e+01   3.9958397e+00
   1.9951736e+01  -2.4211165e+01   1.5000000e+02   1.6464082e+01  -1.0357327e+01   2.4704229e+00
   1.9908688e+01  -2.4333099e+01   1.5000000e+02   1.5753237e+01  -1.0668822e+01   1.0696584e+00
   1.9658258e+01  -2.4964135e+01   1.5000000e+02   1.1582320e+01  -1.1489932e+01  -3.7313773e+00
   1.9658331e+01  -2.5092538e+01   1.5000000e+02   1.0588490e+01  -1.1510551e+01  -4.8223880e+00
   1.9665471e+01  -2.5220779e+01   1.5000000e+02   9.5120922e+00  -1.1503822e+01  -5.8050355e+00
   1.9679684e+01  -2.5348537e+01   1.5000000e+02   8.3779927e+00  -1.1486620e+01  -6.6514791e+00
   1.9700956e+01  -2.5475495e+01   1.5000000e+02   7.2196461e+00  -1.1478236e+01  -7.3491666e+00
   1.9729257e+01  -2.5601333e+01   1.5000000e+02   6.0727185e+00  -1.1498739e+01  -7.9038724e+00
   1.9764537e+01  -2.5725737e+01   1.5000000e+02   4.9694490e+00  -1.1565536e+01  -8.3395374e+00
   1.9806729e+01  -2.5848391e+01   1.5000000e+02   3.9342671e+00  -1.1688606e+01  -8.6957226e+00
   1.9855750e+01  -2.5968986e+01   1.5000000e+02   2.9800972e+00  -1.1865687e+01  -9.0227635e+00
   1.9911494e+01  -2.6087216e+01   1.5000000e+02   2.1058706e+00  -1.2079023e+01  -9.3742373e+00
   1.9973842e+01  -2.6202779e+01   1.5000000e+02   1.2961239e+00  -1.2295031e+01  -9.7973565e+00
   2.0042654e+01  -2.6315381e+01   1.5000000e+02   5.2380538e-01  -1.2467602e+01  -1.0322694e+01
   2.0117773e+01  -2.6424733e+01   1.5000000e+02  -2.4321067e-01  -1.2544738e+01  -1.0956225e+01
   2.0199024e+01  -2.6530553e+01   1.5000000e+02  -1.0330966e+00  -1.2477406e+01  -1.1676487e+01
   2.0286214e+01  -2.6632570e+01   1.5000000e+02  -1.8610785e+00  -1.2228611e+01  -1.2438717e+01
   2.0379135e+01  -2.6730519e+01   1.5000000e+02  -2.7236418e+00  -1.1780234e+01  -1.3185516e+01
   2.0477561e+01  -2.6824146e+01   1.5000000e+02  -3.5984687e+00  -1.1135444e+01  -1.3860782e+01
   2.0581251e+01  -2.6913208e+01   1.5000000e+02  -4.4502591e+00  -1.0315659e+01  -1.4422348e+01
   2.0689946e+01  -2.6997472e+01   1.5000000e+02  -5.2403577e+00  -9.3530525e+00  -1.4848869e+01
   2.0803374e+01  -2.7076718e+01   1.5000000e+02  -5.9367924e+00  -8.2812799e+00  -1.5139103e+01
   2.0921248e+01  -2.7150738e+01   1.5000000e+02  -6.5213933e+00  -7.1279970e+00  -1.5304662e+01
   2.1043269e+01  -2.7219339e+01   1.5000000e+02  -6.9923122e+00  -5.9116396e+00  -1.5360015e+01
   2.1169124e+01  -2.7282339e+01   1.5000000e+02  -7.3620081e+00  -4.6430503e+00  -1.5314128e+01
   2.1298486e+01  -2.7339571e+01   1.5000000e+02  -7.6523605e+00  -3.3301472e+00  -1.5166816e+01
   2.1431022e+01  -2.7390886e+01   1.5000000e+02  -7.8890060e+00  -1.9826708e+00  -1.4910469e+01
   2.1566384e+01  -2.7436147e+01   1.5000000e+02  -8.0967285e+00  -6.1469263e-01  -1.4535301e+01
   2.1704218e+01  -2.7475234e+01   1.5000000e+02  -8.2969963e+00   7.5631486e-01  -1.4034824e+01
   2.1844161e+01  -2.7508043e+01   1.5000000e+02  -8.5075729e+00   2.1122678e+00  -1.3408835e+01
   2.1985845e+01  -2.7534487e+01   1.5000000e+02  -8.7433985e+00   3.4368404e+00  -1.2663006e+01
   2.2128894e+01  -2.7554495e+01   1.5000000e+02  -9.0175153e+00   4.7153200e+00  -1.1806561e+01
   2.2272929e+01  -2.7568015e+01   1.5000000e+02  -9.3410635e+00   5.9320604e+00  -1.0850564e+01
   2.2417568e+01  -2.7575011e+01   1.5000000e+02  -9.7219939e+00   7.0674125e+00  -9.8089249e+00
   2.2562425e+01  -2.7575463e+01   1.5000000e+02  -1.0162804e+01   8.0970950e+00  -8.7020253e+00
   2.2707117e+01  -2.7569371e+01   1.5000000e+02  -1.0658073e+01   8.9959787e+00  -7.5604654e+00
   2.2851258e+01  -2.7556750e+01   1.5000000e+02  -1.1192713e+01   9.7453717e+00  -6.4256252e+00
   2.2994466e+01  -2.7537635e+01   1.5000000e+02  -1.1741828e+01   1.0340511e+01  -5.3444172e+00
   2.3136361e+01  -2.7512076e+01   1.5000000e+02  -1.2272917e+01   1.0793591e+01  -4.3597003e+00
   2.3276567e+01  -2.7480142e+01   1.5000000e+02  -1.2750429e+01   1.1130275e+01  -3.5005864e+00
   2.3414714e+01  -2.7441917e+01   1.5000000e+02  -1.3141666e+01   1.1381484e+01  -2.7776636e+00
   2.3550439e+01  -2.7397502e+01   1.5000000e+02  -1.3421928e+01   1.1575062e+01  -2.1846389e+00
   2.3683386e+01  -2.7347016e+01   1.5000000e+02  -1.3577283e+01   1.1731007e+01  -1.7040325e+00
   2.3813207e+01  -2.7290592e+01   1.5000000e+02  -1.3604589e+01   1.1860784e+01  -1.3130404e+00
   2.3939565e+01  -2.7228379e+01   1.5000000e+02  -1.3509775e+01   1.1968707e+01  -9.8720221e-01
   2.4062135e+01  -2.7160542e+01   1.5000000e+02  -1.3305673e+01   1.2053326e+01  -7.0239036e-01
   2.4180600e+01  -2.7087259e+01   1.5000000e+02  -1.3010200e+01   1.2108254e+01  -4.3660530e-01
   2.4294660e+01  -2.7008723e+01   1.5000000e+02  -1.2644940e+01   1.2122964e+01  -1.7217142e-01
   2.4404026e+01  -2.6925139e+01   1.5000000e+02  -1.2233773e+01   1.2084303e+01   1.0143080e-01
   2.4508422e+01  -2.6836727e+01   1.5000000e+02  -1.1801051e+01   1.1979110e+01   3.8544626e-01
   2.4607590e+01  -2.6743716e+01   1.5000000e+02  -1.1369195e+01   1.1797599e+01   6.7160504e-01
   2.4701285e+01  -2.6646349e+01   1.5000000e+02  -1.0956483e+01   1.1536480e+01   9.4462966e-01
   2.4789280e+01  -2.6544879e+01   1.5000000e+02  -1.0576021e+01   1.1200541e+01   1.1867818e+00
   2.4871364e+01  -2.6439568e+01   1.5000000e+02  -1.0236494e+01   1.0802208e+01   1.3822164e+00
   2.4947340e+01  -2.6330687e+01   1.5000000e+02  -9.9440722e+00   1.0359793e+01   1.5190230e+00
   2.5017033e+01  -2.6218517e+01   1.5000000e+02  -9.7040014e+00   9.8955109e+00   1.5884072e+00
   2.5080283e+01  -2.6103346e+01   1.5000000e+02  -9.5206448e+00   9.4340428e+00   1.5819026e+00
   2.5136947e+01  -2.5985467e+01   1.5000000e+02  -9.3957173e+00   9.0012530e+00   1.4887872e+00
   2.5186903e+01  -2.5865180e+01   1.5000000e+02  -9.3253519e+00   8.6224241e+00   1.2951188e+00
   2.5230044e+01  -2.5742792e+01   1.5000000e+02  -9.2970538e+00   8.3197325e+00   9.8499581e-01
   2.5266284e+01  -2.5618612e+01   1.5000000e+02  -9.2878308e+00   8.1090191e+00   5.4426085e-01
   2.5295552e+01  -2.5492953e+01   1.5000000e+02  -9.2649485e+00   7.9965698e+00  -3.4069370e-02
   2.5317797e+01  -2.5366131e+01   1.5000000e+02  -9.1905480e+00   7.9764480e+00  -7.4429642e-01
   2.5332986e+01  -2.5238464e+01   1.5000000e+02  -9.0299733e+00   8.0292583e+00  -1.5654371e+00
   2.5341104e+01  -2.5110271e+01   1.5000000e+02  -8.7611750e+00   8.1229679e+00  -2.4640378e+00
   2.5342152e+01  -2.4981871e+01   1.5000000e+02  -8.3807853e+00   8.2160837e+00  -3.4024646e+00
   2.5336150e+01  -2.4853584e+01   1.5000000e+02  -7.9033052e+00   8.2626966e+00  -4.3492487e+00
   2.5323136e+01  -2.4725725e+01   1.5000000e+02  -7.3531896e+00   8.2183739e+00  -5.2865742e+00
   2.5303161e+01  -2.4598612e+01   1.5000000e+02  -6.7533947e+00   8.0456143e+00  -6.2110388e+00
   2.5276298e+01  -2.4472555e+01   1.5000000e+02  -6.1155200e+00   7.7177850e+00  -7.1273045e+00
   2.5242631e+01  -2.4347866e+01   1.5000000e+02  -5.4359338e+00   7.2212348e+00  -8.0376708e+00
   2.5202263e+01  -2.4224848e+01   1.5000000e+02  -4.6992336e+00   6.5554243e+00  -8.9320454e+00
   2.5155311e+01  -2.4103801e+01   1.5000000e+02  -3.8875023e+00   5.7317652e+00  -9.7827297e+00
   2.5101907e+01  -2.3985020e+01   1.5000000e+02  -2.9914535e+00   4.7715956e+00  -1.0546309e+01
   2.5042198e+01  -2.3868793e+01   1.5000000e+02  -2.0189087e+00   3.7036407e+00  -1.1172323e+01
   2.4976345e+01  -2.3755401e+01   1.5000000e+02  -9.9702581e-01   2.5610040e+00  -1.1615599e+01
   2.4904522e+01  -2.3645119e+01   1.5000000e+02   3.2651740e-02   1.3777296e+00  -1.1847443e+01
   2.4826917e+01  -2.3538210e+01   1.5000000e+02   1.0240153e+00   1.8526664e-01  -1.1861383e+01
   2.4743728e+01  -2.3434933e+01   1.5000000e+02   1.9366747e+00  -9.9031471e-01  -1.1671919e+01
   2.4655167e+01  -2.3335535e+01   1.5000000e+02   2.7428306e+00  -2.1299274e+00  -1.1307895e+01
   2.4561458e+01  -2.3240254e+01   1.5000000e+02   3.4291579e+00  -3.2216114e+00  -1.0804019e+01
   2.4462834e+01  -2.3149316e+01   1.5000000e+02   3.9945637e+00  -4.2597026e+00  -1.0193468e+01
   2.4359540e+01  -2.3062940e+01   1.5000000e+02   4.4457259e+00  -5.2433900e+00  -9.5030890e+00
   2.4251828e+01  -2.2981331e+01   1.5000000e+02   4.7923673e+00  -6.1751591e+00  -8.7512040e+00
   2.4139963e+01  -2.2904682e+01   1.5000000e+02   5.0434416e+00  -7.0590207e+00  -7.9477306e+00
   2.4024215e+01  -2.2833175e+01   1.5000000e+02   5.2051497e+00  -7.8988522e+00  -7.0959473e+00
   2.3904864e+01  -2.2766980e+01   1.5000000e+02   5.2810087e+00  -8.6969213e+00  -6.1953231e+00
   2.3782195e+01  -2.2706254e+01   1.5000000e+02   5.2738180e+00  -9.4529656e+00  -5.2445372e+00
   2.3656504e+01  -2.2651139e+01   1.5000000e+02   5.1885842e+00  -1.0163860e+01  -4.2440066e+00
   2.3528089e+01  -2.2601767e+01   1.5000000e+02   5.0351934e+00  -1.0824002e+01  -3.1974091e+00
   2.3397254e+01  -2.2558253e+01   1.5000000e+02   4.8295559e+00  -1.1426304e+01  -2.1123705e+00
   2.3264310e+01  -2.2520700e+01   1.5000000e+02   4.5928646e+00  -1.1964019e+01  -1.0006124e+00
   2.3129570e+01  -2.2489197e+01   1.5000000e+02   4.3492349e+00  -1.2433542e+01   1.2268414e-01
   2.2993353e+01  -2.2463818e+01   1.5000000e+02   4.1226332e+00  -1.2837583e+01   1.2407771e+00
   2.2855977e+01  -2.2444622e+01   1.5000000e+02   3.9340128e+00  -1.3187429e+01   2.3391143e+00
   2.2717767e+01  -2.2431654e+01   1.5000000e+02   3.7993151e+00  -1.3502653e+01   3.4101886e+00
   2.2579046e+01  -2.2424946e+01   1.5000000e+02   3.7286580e+00  -1.3807566e+01   4.4581960e+00
   2.2440140e+01  -2.2424512e+01   1.5000000e+02   3.7267704e+00  -1.4124778e+01   5.5013942e+00
   2.2301374e+01  -2.2430354e+01   1.5000000e+02   3.7947072e+00  -1.4467397e+01   6.5708625e+00
   2.2163073e+01  -2.2442458e+01   1.5000000e+02   3.9323709e+00  -1.4831921e+01   7.7048781e+00
   2.2025563e+01  -2.2460796e+01   1.5000000e+02   4.1413886e+00  -1.5194206e+01   8.9393493e+00
   2.1889167e+01  -2.2485325e+01   1.5000000e+02   4.4274393e+00  -1.5510524e+01   1.0296150e+01
   2.1754204e+01  -2.2515986e+01   1.5000000e+02   4.8011239e+00  -1.5724500e+01   1.1772281e+01
   2.1620993e+01  -2.2552708e+01   1.5000000e+02   5.2767582e+00  -1.5778953e+01   1.3333188e+01
   2.1489849e+01  -2.2595404e+01   1.5000000e+02   5.8689138e+00  -1.5629917e+01   1.4913152e+01
   2.1361081e+01  -2.2643974e+01   1.5000000e+02   6.5877226e+00  -1.5258772e+01   1.6423624e+01
   2.1234995e+01  -2.2698303e+01   1.5000000e+02   7.4343871e+00  -1.4678435e+01   1.7767850e+01
   2.1111892e+01  -2.2758262e+01   1.5000000e+02   8.3986457e+00  -1.3931200e+01   1.8857652e+01
   2.0992065e+01  -2.2823711e+01   1.5000000e+02   9.4590417e+00  -1.3078977e+01   1.9626906e+01
   2.0875802e+01  -2.2894493e+01   1.5000000e+02   1.0585373e+01  -1.2189828e+01   2.0037792e+01
   2.0763384e+01  -2.2970442e+01   1.5000000e+02   1.1742236e+01  -1.1325761e+01   2.0079203e+01
   2.0655083e+01  -2.3051378e+01   1.5000000e+02   1.2891736e+01  -1.0535492e+01   1.9760187e+01
   2.0551163e+01  -2.3137108e+01   1.5000000e+02   1.3994940e+01  -9.8530367e+00   1.9102502e+01
   2.0451879e+01  -2.3227427e+01   1.5000000e+02   1.5012352e+01  -9.3003529e+00   1.8135708e+01
   2.0357477e+01  -2.3322122e+01   1.5000000e+02   1.5904454e+01  -8.8911508e+00   1.6895859e+01
   2.0268192e+01  -2.3420965e+01   1.5000000e+02   1.6633199e+01  -8.6333677e+00   1.5427021e+01
   2.0184248e+01  -2.3523721e+01   1.5000000e+02   1.7165320e+01  -8.5293443e+00   1.3782941e+01
   2.0105859e+01  -2.3630143e+01   1.5000000e+02   1.7477017e+01  -8.5740924e+00   1.2026990e+01
   2.0033225e+01  -2.3739975e+01   1.5000000e+02   1.7559245e+01  -8.7531255e+00   1.0228411e+01
   1.9966537e+01  -2.3852954e+01   1.5000000e+02   1.7421708e+01  -9.0415775e+00   8.4546298e+00
   1.9905970e+01  -2.3968805e+01   1.5000000e+02   1.7093288e+01  -9.4056525e+00   6.7612592e+00
   1.9851686e+01  -2.4087250e+01   1.5000000e+02   1.6617348e+01  -9.8067156e+00   5.1823652e+00
   1.9803834e+01  -2.4208001e+01   1.5000000e+02   1.6042070e+01  -1.0206833e+01   3.7254473e+00
   1.9762549e+01  -2.4330765e+01   1.5000000e+02   1.5408527e+01  -1.0574200e+01   2.3734415e+00
   1.9727950e+01  -2.4455242e+01   1.5000000e+02   1.4740726e+01  -1.0886763e+01   1.0942704e+00
   1.9700141e+01  -2.4581127e+01   1.5000000e+02   1.4041601e+01  -1.1133261e+01  -1.4522804e-01
   1.9679211e+01  -2.4708114e+01   1.5000000e+02   1.3296539e+01  -1.1311896e+01  -1.3658883e+00
   1.9665231e+01  -2.4835888e+01   1.5000000e+02   1.2483037e+01  -1.1427695e+01  -2.5680060e+00
   1.9561507e+01  -2.5500819e+01   1.5000000e+02   6.9708045e+00  -1.1635869e+01  -6.4231946e+00
   1.9589726e+01  -2.5626946e+01   1.5000000e+02   5.7898344e+00  -1.1640472e+01  -6.9836570e+00
   1.9624627e+01  -2.5751714e+01   1.5000000e+02   4.6456744e+00  -1.1675674e+01  -7.4014898e+00
   1.9666153e+01  -2.5874835e+01   1.5000000e+02   3.5689015e+00  -1.1757979e+01  -7.7098376e+00
   1.9714228e+01  -2.5996026e+01   1.5000000e+02   2.5806946e+00  -1.1894546e+01  -7.9558645e+00
   1.9768761e+01  -2.6115005e+01   1.5000000e+02   1.6888937e+00  -1.2078746e+01  -8.1951946e+00
   1.9829646e+01  -2.6231497e+01   1.5000000e+02   8.8559583e-01  -1.2288070e+01  -8.4829948e+00
   1.9896760e+01  -2.6345231e+01   1.5000000e+02   1.4813697e-01  -1.2485399e+01  -8.8631561e+00
   1.9969966e+01  -2.6455941e+01   1.5000000e+02  -5.5581197e-01  -1.2623843e+01  -9.3584739e+00
   2.0049110e+01  -2.6563367e+01   1.5000000e+02  -1.2597535e+00  -1.2654438e+01  -9.9649917e+00
   2.0134023e+01  -2.6667257e+01   1.5000000e+02  -1.9888045e+00  -1.2535059e+01  -1.0652923e+01
   2.0224521e+01  -2.6767366e+01   1.5000000e+02  -2.7521751e+00  -1.2238312e+01  -1.1374346e+01
   2.0320404e+01  -2.6863457e+01   1.5000000e+02  -3.5403185e+00  -1.1756139e+01  -1.2075469e+01
   2.0421461e+01  -2.6955302e+01   1.5000000e+02  -4.3276733e+00  -1.1099496e+01  -1.2709624e+01
   2.0527463e+01  -2.7042683e+01   1.5000000e+02  -5.0798485e+00  -1.0293154e+01  -1.3246565e+01
   2.0638171e+01  -2.7125392e+01   1.5000000e+02  -5.7627058e+00  -9.3672150e+00  -1.3675504e+01
   2.0753330e+01  -2.7203230e+01   1.5000000e+02  -6.3503630e+00  -8.3485317e+00  -1.4001197e+01
   2.0872674e+01  -2.7276011e+01   1.5000000e+02  -6.8300504e+00  -7.2550128e+00  -1.4235368e+01
   2.0995925e+01  -2.7343561e+01   1.5000000e+02  -7.2029652e+00  -6.0948007e+00  -1.4387158e+01
   2.1122795e+01  -2.7405716e+01   1.5000000e+02  -7.4817685e+00  -4.8700175e+00  -1.4456422e+01
   2.1252984e+01  -2.7462327e+01   1.5000000e+02  -7.6861760e+00  -3.5828986e+00  -1.4432166e+01
   2.1386183e+01  -2.7513257e+01   1.5000000e+02  -7.8383188e+00  -2.2411162e+00  -1.4296268e+01
   2.1522075e+01  -2.7558383e+01   1.5000000e+02  -7.9593047e+00  -8.5978205e-01  -1.4030170e+01
   2.1660335e+01  -2.7597595e+01   1.5000000e+02  -8.0677307e+00   5.4050550e-01  -1.3621192e+01
   2.1800629e+01  -2.7630798e+01   1.5000000e+02  -8.1800504e+00   1.9379385e+00  -1.3065557e+01
   2.1942620e+01  -2.7657911e+01   1.5000000e+02  -8.3119332e+00   3.3131946e+00  -1.2367225e+01
   2.2085964e+01  -2.7678868e+01   1.5000000e+02  -8.4793381e+00   4.6499251e+00  -1.1534244e+01
   2.2230314e+01  -2.7693619e+01   1.5000000e+02  -8.6982901e+00   5.9318756e+00  -1.0575670e+01
   2.2375319e+01  -2.7702127e+01   1.5000000e+02  -8.9830319e+00   7.1385944e+00  -9.5017413e+00
   2.2520628e+01  -2.7704372e+01   1.5000000e+02  -9.3430111e+00   8.2431786e+00  -8.3277263e+00
   2.2665886e+01  -2.7700348e+01   1.5000000e+02  -9.7797143e+00   9.2145554e+00  -7.0794603e+00
   2.2810741e+01  -2.7690065e+01   1.5000000e+02  -1.0284343e+01   1.0024671e+01  -5.7966097e+00
   2.2954841e+01  -2.7673548e+01   1.5000000e+02  -1.0837029e+01   1.0657586e+01  -4.5305239e+00
   2.3097836e+01  -2.7650838e+01   1.5000000e+02  -1.1408095e+01   1.1116017e+01  -3.3359541e+00
   2.3239380e+01  -2.7621989e+01   1.5000000e+02  -1.1961637e+01   1.1421621e+01  -2.2597860e+00
   2.3379131e+01  -2.7587071e+01   1.5000000e+02  -1.2460973e+01   1.1608743e+01  -1.3318541e+00
   2.3516752e+01  -2.7546171e+01   1.5000000e+02  -1.2874539e+01   1.1714930e+01  -5.6174224e-01
   2.3651913e+01  -2.7499386e+01   1.5000000e+02  -1.3180233e+01   1.1772757e+01   5.8169891e-02
   2.3784289e+01  -2.7446830e+01   1.5000000e+02  -1.3366838e+01   1.1805695e+01   5.4677562e-01
   2.3913567e+01  -2.7388631e+01   1.5000000e+02  -1.3432938e+01   1.1827541e+01   9.2877158e-01
   2.4039440e+01  -2.7324929e+01   1.5000000e+02  -1.3384633e+01   1.1843421e+01   1.2309393e+00
   2.4161611e+01  -2.7255877e+01   1.5000000e+02  -1.3233384e+01   1.1850933e+01   1.4797468e+00
   2.4279795e+01  -2.7181642e+01   1.5000000e+02  -1.2994583e+01   1.1841291e+01   1.6990449e+00
   2.4393717e+01  -2.7102402e+01   1.5000000e+02  -1.2686751e+01   1.1800938e+01   1.9073691e+00
   2.4503114e+01  -2.7018346e+01   1.5000000e+02  -1.2330774e+01   1.1713979e+01   2.1153153e+00
   2.4607736e+01  -2.6929676e+01   1.5000000e+02  -1.1948543e+01   1.1565428e+01   2.3237804e+00
   2.4707347e+01  -2.6836603e+01   1.5000000e+02  -1.1560744e+01   1.1344772e+01   2.5241458e+00
   2.4801723e+01  -2.6739348e+01   1.5000000e+02  -1.1184424e+01   1.1048731e+01   2.7011657e+00
   2.4890655e+01  -2.6638142e+01   1.5000000e+02  -1.0831461e+01   1.0682121e+01   2.8378397e+00
   2.4973949e+01  -2.6533223e+01   1.5000000e+02  -1.0508717e+01   1.0256690e+01   2.9201518e+00
   2.5051423e+01  -2.6424839e+01   1.5000000e+02  -1.0219674e+01   9.7889219e+00   2.9396962e+00
   2.5122915e+01  -2.6313244e+01   1.5000000e+02  -9.9664470e+00   9.2980734e+00   2.8934692e+00
   2.5188275e+01  -2.6198700e+01   1.5000000e+02  -9.7510476e+00   8.8052753e+00   2.7814323e+00
   2.5247369e+01  -2.6081474e+01   1.5000000e+02  -9.5752841e+00   8.3331530e+00   2.6035060e+00
   2.5300079e+01  -2.5961839e+01   1.5000000e+02  -9.4393485e+00   7.9051930e+00   2.3571805e+00
   2.5346303e+01  -2.5840072e+01   1.5000000e+02  -9.3395227e+00   7.5441811e+00   2.0365568e+00
   2.5385955e+01  -2.5716454e+01   1.5000000e+02  -9.2657376e+00   7.2696479e+00   1.6333160e+00
   2.5418965e+01  -2.5591271e+01   1.5000000e+02  -9.2001051e+00   7.0947286e+00   1.1397678e+00
   2.5445279e+01  -2.5464810e+01   1.5000000e+02  -9.1178911e+00   7.0230788e+00   5.5333132e-01
   2.5464856e+01  -2.5337360e+01   1.5000000e+02  -8.9919873e+00   7.0465985e+00  -1.1939409e-01
   2.5477675e+01  -2.5209213e+01   1.5000000e+02  -8.8001927e+00   7.1446021e+00  -8.6160102e-01
   2.5483728e+01  -2.5080658e+01   1.5000000e+02  -8.5323593e+00   7.2851240e+00  -1.6501851e+00
   2.5483022e+01  -2.4951989e+01   1.5000000e+02  -8.1934591e+00   7.4281664e+00  -2.4634286e+00
   2.5475580e+01  -2.4823495e+01   1.5000000e+02  -7.8001354e+00   7.5303878e+00  -3.2890235e+00
   2.5461440e+01  -2.4695467e+01   1.5000000e+02  -7.3717623e+00   7.5502101e+00  -4.1278446e+00
   2.5440654e+01  -2.4568191e+01   1.5000000e+02  -6.9198967e+00   7.4523968e+00  -4.9911387e+00
   2.5413289e+01  -2.4441952e+01   1.5000000e+02  -6.4410471e+00   7.2113816e+00  -5.8917206e+00
   2.5379424e+01  -2.4317033e+01   1.5000000e+02  -5.9160191e+00   6.8130562e+00  -6.8328884e+00
   2.5339155e+01  -2.4193711e+01   1.5000000e+02  -5.3162772e+00   6.2549916e+00  -7.7994905e+00
   2.5292589e+01  -2.4072260e+01   1.5000000e+02  -4.6149301e+00   5.5455639e+00  -8.7548902e+00
   2.5239846e+01  -2.3952950e+01   1.5000000e+02  -3.7983569e+00   4.7023276e+00  -9.6452027e+00
   2.5181059e+01  -2.3836043e+01   1.5000000e+02  -2.8741668e+00   3.7498946e+00  -1.0409884e+01
   2.5116373e+01  -2.3721796e+01   1.5000000e+02  -1.8724067e+00   2.7173795e+00  -1.0995242e+01
   2.5045945e+01  -2.3610462e+01   1.5000000e+02  -8.3944990e-01   1.6353764e+00  -1.1366159e+01
   2.4969943e+01  -2.3502284e+01   1.5000000e+02   1.7293461e-01   5.3276537e-01  -1.1511921e+01
   2.4888547e+01  -2.3397498e+01   1.5000000e+02   1.1187781e+00  -5.6585211e-01  -1.1444709e+01
   2.4801945e+01  -2.3296334e+01   1.5000000e+02   1.9655154e+00  -1.6416033e+00  -1.1192631e+01
   2.4710338e+01  -2.3199011e+01   1.5000000e+02   2.6962813e+00  -2.6815023e+00  -1.0790784e+01
   2.4613934e+01  -2.3105742e+01   1.5000000e+02   3.3077828e+00  -3.6776699e+00  -1.0273584e+01
   2.4512952e+01  -2.3016728e+01   1.5000000e+02   3.8056888e+00  -4.6262241e+00  -9.6698011e+00
   2.4407618e+01  -2.2932162e+01   1.5000000e+02   4.1995140e+00  -5.5261887e+00  -9.0004318e+00
   2.4298167e+01  -2.2852228e+01   1.5000000e+02   4.4982846e+00  -6.3785602e+00  -8.2787390e+00
   2.4184843e+01  -2.2777097e+01   1.5000000e+02   4.7078260e+00  -7.1855289e+00  -7.5117429e+00
   2.4067894e+01  -2.2706932e+01   1.5000000e+02   4.8301526e+00  -7.9498145e+00  -6.7024873e+00
   2.3947577e+01  -2.2641884e+01   1.5000000e+02   4.8649221e+00  -8.6740936e+00  -5.8523108e+00
   2.3824154e+01  -2.2582093e+01   1.5000000e+02   4.8124318e+00  -9.3605048e+00  -4.9624673e+00
   2.3697894e+01  -2.2527687e+01   1.5000000e+02   4.6769509e+00  -1.0010064e+01  -4.0348328e+00
   2.3569070e+01  -2.2478782e+01   1.5000000e+02   4.4690764e+00  -1.0622014e+01  -3.0719488e+00
   2.3437960e+01  -2.2435485e+01   1.5000000e+02   4.2061859e+00  -1.1193368e+01  -2.0771655e+00
   2.3304846e+01  -2.2397887e+01   1.5000000e+02   3.9108460e+00  -1.1719324e+01  -1.0553482e+00
   2.3170014e+01  -2.2366070e+01   1.5000000e+02   3.6079850e+00  -1.2195161e+01  -1.3907667e-02
   2.3033751e+01  -2.2340100e+01   1.5000000e+02   3.3216972e+00  -1.2619402e+01   1.0371319e+00
   2.2896351e+01  -2.2320035e+01   1.5000000e+02   3.0726240e+00  -1.2996933e+01   2.0869977e+00
   2.2758106e+01  -2.2305916e+01   1.5000000e+02   2.8760989e+00  -1.3340289e+01   3.1281913e+00
   2.2619311e+01  -2.2297773e+01   1.5000000e+02   2.7414225e+00  -1.3667853e+01   4.1611258e+00
   2.2480261e+01  -2.2295625e+01   1.5000000e+02   2.6721665e+00  -1.3999023e+01   5.1976639e+00
   2.2341254e+01  -2.2299476e+01   1.5000000e+02   2.6675083e+00  -1.4347431e+01   6.2617722e+00
   2.2202585e+01  -2.2309317e+01   1.5000000e+02   2.7245341e+00  -1.4714022e+01   7.3864216e+00
   2.2064549e+01  -2.2325128e+01   1.5000000e+02   2.8411252e+00  -1.5082050e+01   8.6065332e+00
   2.1927442e+01  -2.2346874e+01   1.5000000e+02   3.0187334e+00  -1.5416003e+01   9.9491348e+00
   2.1791557e+01  -2.2374510e+01   1.5000000e+02   3.2643426e+00  -1.5665635e+01   1.1422989e+01
   2.1657183e+01  -2.2407975e+01   1.5000000e+02   3.5906230e+00  -1.5774937e+01   1.3010474e+01
   2.1524609e+01  -2.2447199e+01   1.5000000e+02   4.0140781e+00  -1.5694341e+01   1.4664395e+01
   2.1394119e+01  -2.2492098e+01   1.5000000e+02   4.5511925e+00  -1.5393171e+01   1.6311633e+01
   2.1265995e+01  -2.2542575e+01   1.5000000e+02   5.2138080e+00  -1.4868625e+01   1.7863407e+01
   2.1140513e+01  -2.2598522e+01   1.5000000e+02   6.0052030e+00  -1.4148099e+01   1.9229870e+01
   2.1017944e+01  -2.2659819e+01   1.5000000e+02   6.9181432e+00  -1.3283797e+01   2.0334514e+01
   2.0898557e+01  -2.2726334e+01   1.5000000e+02   7.9353856e+00  -1.2341576e+01   2.1123935e+01
   2.0782611e+01  -2.2797925e+01   1.5000000e+02   9.0319821e+00  -1.1388054e+01   2.1570549e+01
   2.0670361e+01  -2.2874436e+01   1.5000000e+02   1.0177891e+01  -1.0480523e+01   2.1668779e+01
   2.0562055e+01  -2.2955703e+01   1.5000000e+02   1.1339939e+01  -9.6620769e+00   2.1428032e+01
   2.0457932e+01  -2.3041550e+01   1.5000000e+02   1.2482443e+01  -8.9619199e+00   2.0866323e+01
   2.0358227e+01  -2.3131792e+01   1.5000000e+02   1.3567340e+01  -8.3988131e+00   2.0006973e+01
   2.0263163e+01  -2.3226233e+01   1.5000000e+02   1.4554652e+01  -7.9847447e+00   1.8878939e+01
   2.0172956e+01  -2.3324668e+01   1.5000000e+02   1.5404311e+01  -7.7270526e+00   1.7519113e+01
   2.0087812e+01  -2.3426883e+01   1.5000000e+02   1.6079529e+01  -7.6281948e+00   1.5974534e+01
   2.0007928e+01  -2.3532655e+01   1.5000000e+02   1.6551444e+01  -7.6839263e+00   1.4302522e+01
   1.9933490e+01  -2.3641754e+01   1.5000000e+02   1.6804242e+01  -7.8812096e+00   1.2567550e+01
   1.9864676e+01  -2.3753940e+01   1.5000000e+02   1.6839373e+01  -8.1972797e+00   1.0834805e+01
   1.9801649e+01  -2.3868967e+01   1.5000000e+02   1.6677175e+01  -8.6007860e+00   9.1611986e+00
   1.9744563e+01  -2.3986583e+01   1.5000000e+02   1.6354293e+01  -9.0551990e+00   7.5860887e+00
   1.9693560e+01  -2.4106528e+01   1.5000000e+02   1.5916323e+01  -9.5236459e+00   6.1247588e+00
   1.9648769e+01  -2.4228537e+01   1.5000000e+02   1.5407071e+01  -9.9738983e+00   4.7674050e+00
   1.9610308e+01  -2.4352341e+01   1.5000000e+02   1.4857666e+01  -1.0382008e+01   3.4850522e+00
   1.9578279e+01  -2.4477663e+01   1.5000000e+02   1.4279441e+01  -1.0733619e+01   2.2412862e+00
   1.9552774e+01  -2.4604225e+01   1.5000000e+02   1.3663394e+01  -1.1023021e+01   1.0058075e+00
   1.9533868e+01  -2.4731743e+01   1.5000000e+02   1.2986535e+01  -1.1250581e+01  -2.3434157e-01
   1.9521625e+01  -2.4859933e+01   1.5000000e+02   1.2222609e+01  -1.1419973e+01  -1.4701503e+00
   1.9516092e+01  -2.4988506e+01   1.5000000e+02   1.1353041e+01  -1.1536293e+01  -2.6732965e+00
   1.9517303e+01  -2.5117173e+01   1.5000000e+02   1.0374121e+01  -1.1605758e+01  -3.8047277e+00
   1.9525276e+01  -2.5245641e+01   1.5000000e+02   9.2986534e+00  -1.1636744e+01  -4.8250661e+00
   1.9540015e+01  -2.5373620e+01   1.5000000e+02   8.1527998e+00  -1.1641291e+01  -5.7035100e+00
   1.9582278e+01  -2.6044625e+01   1.5000000e+02   2.0711407e+00  -1.1885341e+01  -6.8603673e+00
   1.9636798e+01  -2.6163869e+01   1.5000000e+02   1.1792856e+00  -1.2042268e+01  -7.0130047e+00
   1.9697417e+01  -2.6280740e+01   1.5000000e+02   3.9241352e-01  -1.2235767e+01  -7.1974430e+00
   1.9764025e+01  -2.6394989e+01   1.5000000e+02  -3.0872639e-01  -1.2436009e+01  -7.4650070e+00
   1.9836497e+01  -2.6506371e+01   1.5000000e+02  -9.5571274e-01  -1.2601505e+01  -7.8486697e+00
   1.9914695e+01  -2.6614647e+01   1.5000000e+02  -1.5844429e+00  -1.2685810e+01  -8.3560610e+00
   1.9998467e+01  -2.6719585e+01   1.5000000e+02  -2.2256412e+00  -1.2645953e+01  -8.9685822e+00
   2.0087649e+01  -2.6820956e+01   1.5000000e+02  -2.8968115e+00  -1.2450574e+01  -9.6471589e+00
   2.0182062e+01  -2.6918543e+01   1.5000000e+02  -3.5981644e+00  -1.2085530e+01  -1.0342773e+01
   2.0281515e+01  -2.7012132e+01   1.5000000e+02  -4.3133490e+00  -1.1555257e+01  -1.1008731e+01
   2.0385805e+01  -2.7101520e+01   1.5000000e+02  -5.0145317e+00  -1.0879259e+01  -1.1610762e+01
   2.0494715e+01  -2.7186511e+01   1.5000000e+02  -5.6697771e+00  -1.0084765e+01  -1.2132145e+01
   2.0608019e+01  -2.7266919e+01   1.5000000e+02  -6.2505542e+00  -9.1978776e+00  -1.2572638e+01
   2.0725477e+01  -2.7342569e+01   1.5000000e+02  -6.7373322e+00  -8.2363675e+00  -1.2941931e+01
   2.0846840e+01  -2.7413292e+01   1.5000000e+02  -7.1222488e+00  -7.2065867e+00  -1.3250472e+01
   2.0971849e+01  -2.7478933e+01   1.5000000e+02  -7.4087862e+00  -6.1055026e+00  -1.3500883e+01
   2.1100234e+01  -2.7539347e+01   1.5000000e+02  -7.6090942e+00  -4.9267931e+00  -1.3683349e+01
   2.1231716e+01  -2.7594400e+01   1.5000000e+02  -7.7401831e+00  -3.6681454e+00  -1.3776451e+01
   2.1366011e+01  -2.7643970e+01   1.5000000e+02  -7.8202688e+00  -2.3364577e+00  -1.3752899e+01
   2.1502822e+01  -2.7687946e+01   1.5000000e+02  -7.8664123e+00  -9.4877890e-01  -1.3587486e+01
   2.1641851e+01  -2.7726231e+01   1.5000000e+02  -7.8940675e+00   4.7142170e-01  -1.3263670e+01
   2.1782789e+01  -2.7758739e+01   1.5000000e+02  -7.9182817e+00   1.8999161e+00  -1.2775866e+01
   2.1925324e+01  -2.7785398e+01   1.5000000e+02  -7.9555170e+00   3.3161665e+00  -1.2126921e+01
   2.2069141e+01  -2.7806148e+01   1.5000000e+02  -8.0247029e+00   4.7036098e+00  -1.1323032e+01
   2.2213918e+01  -2.7820943e+01   1.5000000e+02  -8.1464587e+00   6.0456858e+00  -1.0369844e+01
   2.2359334e+01  -2.7829750e+01   1.5000000e+02  -8.3403352e+00   7.3203395e+00  -9.2726361e+00
   2.2505064e+01  -2.7832548e+01   1.5000000e+02  -8.6208602e+00   8.4966557e+00  -8.0412172e+00
   2.2650783e+01  -2.7829332e+01   1.5000000e+02  -8.9937492e+00   9.5368669e+00  -6.6970067e+00
   2.2796165e+01  -2.7820109e+01   1.5000000e+02  -9.4535193e+00   1.0403921e+01  -5.2782535e+00
   2.2940886e+01  -2.7804899e+01   1.5000000e+02  -9.9829782e+00   1.1071938e+01  -3.8395841e+00
   2.3084624e+01  -2.7783737e+01   1.5000000e+02  -1.0554567e+01   1.1534909e+01  -2.4447573e+00
   2.3227059e+01  -2.7756669e+01   1.5000000e+02  -1.1133533e+01   1.1809607e+01  -1.1548526e+00
   2.3367874e+01  -2.7723757e+01   1.5000000e+02  -1.1682697e+01   1.1931367e+01  -1.6445977e-02
   2.3506758e+01  -2.7685074e+01   1.5000000e+02  -1.2168111e+01   1.1944712e+01   9.4543039e-01
   2.3643404e+01  -2.7640706e+01   1.5000000e+02  -1.2563837e+01   1.1893119e+01   1.7275108e+00
   2.3777513e+01  -2.7590751e+01   1.5000000e+02  -1.2854336e+01   1.1811770e+01   2.3433361e+00
   2.3908790e+01  -2.7535322e+01   1.5000000e+02  -1.3034014e+01   1.1724511e+01   2.8166372e+00
   2.4036949e+01  -2.7474540e+01   1.5000000e+02  -1.3105039e+01   1.1643785e+01   3.1757671e+00
   2.4161713e+01  -2.7408541e+01   1.5000000e+02  -1.3074796e+01   1.1571805e+01   3.4499113e+00
   2.4282813e+01  -2.7337470e+01   1.5000000e+02  -1.2954106e+01   1.1502207e+01   3.6661203e+00
   2.4399990e+01  -2.7261485e+01   1.5000000e+02  -1.2756373e+01   1.1422152e+01   3.8469106e+00
   2.4512996e+01  -2.7180752e+01   1.5000000e+02  -1.2497383e+01   1.1315043e+01   4.0080134e+00
   2.4621593e+01  -2.7095449e+01   1.5000000e+02  -1.2195037e+01   1.1163766e+01   4.1566762e+00
   2.4725553e+01  -2.7005763e+01   1.5000000e+02  -1.1868356e+01   1.0954216e+01   4.2909282e+00
   2.4824663e+01  -2.6911889e+01   1.5000000e+02  -1.1535509e+01   1.0678386e+01   4.4007882e+00
   2.4918718e+01  -2.6814033e+01   1.5000000e+02  -1.1211530e+01   1.0336047e+01   4.4715394e+00
   2.5007530e+01  -2.6712406e+01   1.5000000e+02  -1.0906652e+01   9.9342621e+00   4.4883388e+00
   2.5090920e+01  -2.6607230e+01   1.5000000e+02  -1.0626067e+01   9.4852401e+00   4.4402959e+00
   2.5168725e+01  -2.6498730e+01   1.5000000e+02  -1.0370956e+01   9.0037490e+00   4.3226575e+00
   2.5240794e+01  -2.6387141e+01   1.5000000e+02  -1.0140224e+01   8.5055277e+00   4.1367263e+00
   2.5306989e+01  -2.6272702e+01   1.5000000e+02  -9.9321106e+00   8.0070615e+00   3.8880845e+00
   2.5367188e+01  -2.6155658e+01   1.5000000e+02  -9.7452303e+00   7.5261252e+00   3.5841550e+00
   2.5421281e+01  -2.6036259e+01   1.5000000e+02  -9.5787260e+00   7.0821388e+00   3.2316978e+00
   2.5469171e+01  -2.5914758e+01   1.5000000e+02  -9.4314069e+00   6.6954742e+00   2.8348616e+00
   2.5510778e+01  -2.5791412e+01   1.5000000e+02  -9.3000003e+00   6.3855393e+00   2.3943194e+00
   2.5546034e+01  -2.5666483e+01   1.5000000e+02  -9.1771383e+00   6.1680370e+00   1.9080130e+00
   2.5574885e+01  -2.5540232e+01   1.5000000e+02  -9.0503535e+00   6.0518873e+00   1.3736913e+00
   2.5597291e+01  -2.5412926e+01   1.5000000e+02  -8.9035615e+00   6.0365758e+00   7.9240335e-01
   2.5613226e+01  -2.5284830e+01   1.5000000e+02  -8.7215159e+00   6.1106087e+00   1.7076873e-01
   2.5622677e+01  -2.5156210e+01   1.5000000e+02  -8.4957671e+00   6.2515850e+00  -4.8004305e-01
   2.5625646e+01  -2.5027335e+01   1.5000000e+02  -8.2288686e+00   6.4280044e+00  -1.1492177e+00
   2.5622147e+01  -2.4898470e+01   1.5000000e+02  -7.9336956e+00   6.6025606e+00  -1.8330944e+00
   2.5612207e+01  -2.4769883e+01   1.5000000e+02  -7.6270914e+00   6.7361535e+00  -2.5398635e+00
   2.5595867e+01  -2.4641837e+01   1.5000000e+02  -7.3201299e+00   6.7919557e+00  -3.2889107e+00
   2.5573179e+01  -2.4514596e+01   1.5000000e+02  -7.0094576e+00   6.7389276e+00  -4.1037856e+00
   2.5544210e+01  -2.4388419e+01   1.5000000e+02  -6.6738414e+00   6.5543388e+00  -5.0010800e+00
   2.5509036e+01  -2.4263564e+01   1.5000000e+02  -6.2778674e+00   6.2251986e+00  -5.9795095e+00
   2.5467747e+01  -2.4140284e+01   1.5000000e+02  -5.7817118e+00   5.7485165e+00  -7.0133824e+00
   2.5420444e+01  -2.4018831e+01   1.5000000e+02  -5.1537141e+00   5.1307607e+00  -8.0530957e+00
   2.5367238e+01  -2.3899449e+01   1.5000000e+02  -4.3815762e+00   4.3866463e+00  -9.0329359e+00
   2.5308254e+01  -2.3782379e+01   1.5000000e+02  -3.4784826e+00   3.5374649e+00  -9.8840441e+00
   2.5243625e+01  -2.3667857e+01   1.5000000e+02  -2.4817166e+00   2.6088002e+00  -1.0548858e+01
   2.5173494e+01  -2.3556112e+01   1.5000000e+02  -1.4442603e+00   1.6277106e+00  -1.0992163e+01
   2.5098015e+01  -2.3447369e+01   1.5000000e+02  -4.2257870e-01   6.1986658e-01  -1.1205325e+01
   2.5017352e+01  -2.3341845e+01   1.5000000e+02   5.3490065e-01  -3.9277828e-01  -1.1203156e+01
   2.4931676e+01  -2.3239751e+01   1.5000000e+02   1.3949292e+00  -1.3931394e+00  -1.1015771e+01
   2.4841169e+01  -2.3141288e+01   1.5000000e+02   2.1410501e+00  -2.3689267e+00  -1.0679178e+01
   2.4746020e+01  -2.3046654e+01   1.5000000e+02   2.7708393e+00  -3.3117062e+00  -1.0227682e+01
   2.4646427e+01  -2.2956035e+01   1.5000000e+02   3.2908833e+00  -4.2158085e+00  -9.6893587e+00
   2.4542595e+01  -2.2869611e+01   1.5000000e+02   3.7113565e+00  -5.0774043e+00  -9.0845405e+00
   2.4434735e+01  -2.2787553e+01   1.5000000e+02   4.0414715e+00  -5.8940256e+00  -8.4264613e+00
   2.4323068e+01  -2.2710022e+01   1.5000000e+02   4.2865101e+00  -6.6644412e+00  -7.7232308e+00
   2.4207817e+01  -2.2637172e+01   1.5000000e+02   4.4469451e+00  -7.3888944e+00  -6.9802534e+00
   2.4089216e+01  -2.2569145e+01   1.5000000e+02   4.5196731e+00  -8.0694267e+00  -6.2022687e+00
   2.3967500e+01  -2.2506075e+01   1.5000000e+02   4.5010362e+00  -8.7101026e+00  -5.3942557e+00
   2.3842912e+01  -2.2448087e+01   1.5000000e+02   4.3905196e+00  -9.3165961e+00  -4.5610122e+00
   2.3715699e+01  -2.2395293e+01   1.5000000e+02   4.1938223e+00  -9.8949670e+00  -3.7057748e+00
   2.3586111e+01  -2.2347797e+01   1.5000000e+02   3.9241596e+00  -1.0449703e+01  -2.8290645e+00
   2.3454405e+01  -2.2305692e+01   1.5000000e+02   3.6013758e+00  -1.0981800e+01  -1.9288864e+00
   2.3320837e+01  -2.2269060e+01   1.5000000e+02   3.2493954e+00  -1.1488155e+01  -1.0026203e+00
   2.3185671e+01  -2.2237973e+01   1.5000000e+02   2.8931019e+00  -1.1963039e+01  -4.9832214e-02
   2.3049170e+01  -2.2212492e+01   1.5000000e+02   2.5555273e+00  -1.2401552e+01   9.2604360e-01
   2.2911600e+01  -2.2192666e+01   1.5000000e+02   2.2558203e+00  -1.2803405e+01   1.9184410e+00
   2.2773229e+01  -2.2178534e+01   1.5000000e+02   2.0079935e+00  -1.3175109e+01   2.9210389e+00
   2.2634327e+01  -2.2170124e+01   1.5000000e+02   1.8203465e+00  -1.3529230e+01   3.9324198e+00
   2.2495164e+01  -2.2167452e+01   1.5000000e+02   1.6956172e+00  -1.3880600e+01   4.9600953e+00
   2.2356011e+01  -2.2170523e+01   1.5000000e+02   1.6319963e+00  -1.4240461e+01   6.0221771e+00
   2.2217137e+01  -2.2179331e+01   1.5000000e+02   1.6250185e+00  -1.4610114e+01   7.1457082e+00
   2.2078813e+01  -2.2193860e+01   1.5000000e+02   1.6701663e+00  -1.4975888e+01   8.3613549e+00
   2.1941309e+01  -2.2214080e+01   1.5000000e+02   1.7656601e+00  -1.5307286e+01   9.6953168e+00
   2.1804892e+01  -2.2239952e+01   1.5000000e+02   1.9148426e+00  -1.5559471e+01   1.1160151e+01
   2.1669828e+01  -2.2271426e+01   1.5000000e+02   2.1272425e+00  -1.5680214e+01   1.2746778e+01
   2.1536382e+01  -2.2308441e+01   1.5000000e+02   2.4178077e+00  -1.5620240e+01   1.4420103e+01
   2.1404814e+01  -2.2350923e+01   1.5000000e+02   2.8042000e+00  -1.5344702e+01   1.6120120e+01
   2.1275383e+01  -2.2398790e+01   1.5000000e+02   3.3028779e+00  -1.4842714e+01   1.7768985e+01
   2.1148344e+01  -2.2451949e+01   1.5000000e+02   3.9249771e+00  -1.4131809e+01   1.9282919e+01
   2.1023948e+01  -2.2510294e+01   1.5000000e+02   4.6733802e+00  -1.3255501e+01   2.0585534e+01
   2.0902441e+01  -2.2573713e+01   1.5000000e+02   5.5419109e+00  -1.2274628e+01   2.1618483e+01
   2.0784065e+01  -2.2642079e+01   1.5000000e+02   6.5162163e+00  -1.1255516e+01   2.2346301e+01
   2.0669056e+01  -2.2715259e+01   1.5000000e+02   7.5758922e+00  -1.0259033e+01   2.2754875e+01
   2.0557645e+01  -2.2793110e+01   1.5000000e+02   8.6961918e+00  -9.3337304e+00   2.2845551e+01
   2.0450059e+01  -2.2875477e+01   1.5000000e+02   9.8487396e+00  -8.5141103e+00   2.2628363e+01
   2.0346514e+01  -2.2962198e+01   1.5000000e+02   1.1001402e+01  -7.8228303e+00   2.2117440e+01
   2.0247223e+01  -2.3053101e+01   1.5000000e+02   1.2117945e+01  -7.2746571e+00   2.1330036e+01
   2.0152390e+01  -2.3148008e+01   1.5000000e+02   1.3158704e+01  -6.8795970e+00   2.0288599e+01
   2.0062213e+01  -2.3246729e+01   1.5000000e+02   1.4082690e+01  -6.6440339e+00   1.9024090e+01
   1.9976880e+01  -2.3349068e+01   1.5000000e+02   1.4851414e+01  -6.5697951e+00   1.7578193e+01
   1.9896571e+01  -2.3454823e+01   1.5000000e+02   1.5433600e+01  -6.6521461e+00   1.6003118e+01
   1.9821459e+01  -2.3563781e+01   1.5000000e+02   1.5810027e+01  -6.8779310e+00   1.4358508e+01
   1.9751705e+01  -2.3675726e+01   1.5000000e+02   1.5977562e+01  -7.2250302e+00   1.2705354e+01
   1.9687464e+01  -2.3790433e+01   1.5000000e+02   1.5950982e+01  -7.6636645e+00   1.1098150e+01
   1.9628877e+01  -2.3907671e+01   1.5000000e+02   1.5761347e+01  -8.1595000e+00   9.5765439e+00
   1.9576078e+01  -2.4027205e+01   1.5000000e+02   1.5450284e+01  -8.6779945e+00   8.1587563e+00
   1.9529189e+01  -2.4148793e+01   1.5000000e+02   1.5060714e+01  -9.1887168e+00   6.8394030e+00
   1.9488322e+01  -2.4272190e+01   1.5000000e+02   1.4626454e+01  -9.6685989e+00   5.5930380e+00
   1.9453576e+01  -2.4397145e+01   1.5000000e+02   1.4163994e+01  -1.0103130e+01   4.3834662e+00
   1.9425041e+01  -2.4523405e+01   1.5000000e+02   1.3669550e+01  -1.0485458e+01   3.1761017e+00
   1.9402792e+01  -2.4650711e+01   1.5000000e+02   1.3122617e+01  -1.0813868e+01   1.9497863e+00
   1.9386895e+01  -2.4778802e+01   1.5000000e+02   1.2494821e+01  -1.1088908e+01   7.0380103e-01
   1.9377401e+01  -2.4907418e+01   1.5000000e+02   1.1760645e+01  -1.1311232e+01  -5.4172352e-01
   1.9374351e+01  -2.5036291e+01   1.5000000e+02   1.0906225e+01  -1.1481032e+01  -1.7515446e+00
   1.9377770e+01  -2.5165157e+01   1.5000000e+02   9.9333233e+00  -1.1599164e+01  -2.8844489e+00
   1.9387672e+01  -2.5293749e+01   1.5000000e+02   8.8584706e+00  -1.1669279e+01  -3.9020023e+00
   1.9404057e+01  -2.5421799e+01   1.5000000e+02   7.7090434e+00  -1.1699949e+01  -4.7746247e+00
   1.9426911e+01  -2.5549041e+01   1.5000000e+02   6.5188576e+00  -1.1705722e+01  -5.4847957e+00
   1.9456209e+01  -2.5675208e+01   1.5000000e+02   5.3247928e+00  -1.1706390e+01  -6.0287591e+00
   1.9491908e+01  -2.5800036e+01   1.5000000e+02   4.1640079e+00  -1.1724239e+01  -6.4180076e+00
   1.9533954e+01  -2.5923262e+01   1.5000000e+02   3.0706275e+00  -1.1779567e+01  -6.6805703e+00
   1.9714474e+01  -2.6573850e+01   1.5000000e+02  -1.3791069e+00  -1.2488842e+01  -6.3645059e+00
   1.9792084e+01  -2.6681696e+01   1.5000000e+02  -1.9315712e+00  -1.2601637e+01  -6.7940324e+00
   1.9874991e+01  -2.6786394e+01   1.5000000e+02  -2.4876792e+00  -1.2610604e+01  -7.3421599e+00
   1.9963048e+01  -2.6887738e+01   1.5000000e+02  -3.0698050e+00  -1.2484068e+01  -7.9771039e+00
   2.0056096e+01  -2.6985528e+01   1.5000000e+02  -3.6851872e+00  -1.2205492e+01  -8.6553601e+00
   2.0153966e+01  -2.7079572e+01   1.5000000e+02  -4.3255913e+00  -1.1775677e+01  -9.3324759e+00
   2.0256476e+01  -2.7169685e+01   1.5000000e+02  -4.9704892e+00  -1.1210604e+01  -9.9727687e+00
   2.0363436e+01  -2.7255686e+01   1.5000000e+02  -5.5925279e+00  -1.0535337e+01  -1.0555623e+01
   2.0474643e+01  -2.7337406e+01   1.5000000e+02  -6.1637071e+00  -9.7756955e+00  -1.1076575e+01
   2.0589885e+01  -2.7414681e+01   1.5000000e+02  -6.6607573e+00  -8.9503144e+00  -1.1543397e+01
   2.0708943e+01  -2.7487358e+01   1.5000000e+02  -7.0687920e+00  -8.0656783e+00  -1.1968290e+01
   2.0831584e+01  -2.7555290e+01   1.5000000e+02  -7.3826805e+00  -7.1160293e+00  -1.2358877e+01
   2.0957571e+01  -2.7618341e+01   1.5000000e+02  -7.6062978e+00  -6.0880183e+00  -1.2711137e+01
   2.1086657e+01  -2.7676384e+01   1.5000000e+02  -7.7500282e+00  -4.9685447e+00  -1.3006716e+01
   2.1218587e+01  -2.7729303e+01   1.5000000e+02  -7.8274952e+00  -3.7524720e+00  -1.3215804e+01
   2.1353099e+01  -2.7776990e+01   1.5000000e+02  -7.8526576e+00  -2.4470362e+00  -1.3304477e+01
   2.1489926e+01  -2.7819350e+01   1.5000000e+02  -7.8383744e+00  -1.0710763e+00  -1.3243375e+01
   2.1628795e+01  -2.7856296e+01   1.5000000e+02  -7.7969150e+00   3.5024869e-01  -1.3013977e+01
   2.1769425e+01  -2.7887753e+01   1.5000000e+02  -7.7419608e+00   1.7922691e+00  -1.2609683e+01
   2.1911535e+01  -2.7913657e+01   1.5000000e+02  -7.6907931e+00   3.2353510e+00  -1.2031771e+01
   2.2054838e+01  -2.7933957e+01   1.5000000e+02  -7.6651641e+00   4.6643080e+00  -1.1283133e+01
   2.2199043e+01  -2.7948610e+01   1.5000000e+02  -7.6898659e+00   6.0631624e+00  -1.0363984e+01
   2.2343859e+01  -2.7957588e+01   1.5000000e+02  -7.7890070e+00   7.4083258e+00  -9.2726665e+00
   2.2488992e+01  -2.7960870e+01   1.5000000e+02  -7.9811899e+00   8.6644949e+00  -8.0118936e+00
   2.2634147e+01  -2.7958452e+01   1.5000000e+02  -8.2752334e+00   9.7866540e+00  -6.5974672e+00
   2.2779029e+01  -2.7950337e+01   1.5000000e+02  -8.6679852e+00   1.0728304e+01  -5.0649500e+00
   2.2923346e+01  -2.7936543e+01   1.5000000e+02  -9.1444378e+00   1.1453020e+01  -3.4704214e+00
   2.3066804e+01  -2.7917097e+01   1.5000000e+02  -9.6796715e+00   1.1944668e+01  -1.8842449e+00
   2.3209114e+01  -2.7892039e+01   1.5000000e+02  -1.0241878e+01   1.2212542e+01  -3.7932875e-01
   2.3349987e+01  -2.7861420e+01   1.5000000e+02  -1.0796238e+01   1.2289402e+01   9.8199322e-01
   2.3489141e+01  -2.7825302e+01   1.5000000e+02  -1.1309496e+01   1.2223378e+01   2.1582439e+00
   2.3626295e+01  -2.7783759e+01   1.5000000e+02  -1.1754348e+01   1.2066897e+01   3.1326835e+00
   2.3761176e+01  -2.7736873e+01   1.5000000e+02  -1.2112429e+01   1.1866773e+01   3.9106660e+00
   2.3893514e+01  -2.7684741e+01   1.5000000e+02  -1.2374819e+01   1.1658219e+01   4.5129673e+00
   2.4023048e+01  -2.7627467e+01   1.5000000e+02  -1.2540548e+01   1.1462900e+01   4.9684813e+00
   2.4149521e+01  -2.7565168e+01   1.5000000e+02  -1.2614075e+01   1.1289637e+01   5.3083997e+00
   2.4272685e+01  -2.7497967e+01   1.5000000e+02  -1.2603081e+01   1.1136352e+01   5.5620766e+00
   2.4392301e+01  -2.7426001e+01   1.5000000e+02  -1.2517071e+01   1.0992693e+01   5.7543866e+00
   2.4508136e+01  -2.7349414e+01   1.5000000e+02  -1.2366983e+01   1.0843130e+01   5.9038873e+00
   2.4619969e+01  -2.7268357e+01   1.5000000e+02  -1.2165299e+01   1.0670272e+01   6.0218937e+00
   2.4727586e+01  -2.7182994e+01   1.5000000e+02  -1.1926164e+01   1.0458228e+01   6.1121204e+00
   2.4830783e+01  -2.7093494e+01   1.5000000e+02  -1.1664878e+01   1.0195706e+01   6.1710384e+00
   2.4929369e+01  -2.7000034e+01   1.5000000e+02  -1.1396522e+01   9.8781625e+00   6.1895846e+00
   2.5023159e+01  -2.6902800e+01   1.5000000e+02  -1.1134166e+01   9.5083233e+00   6.1560030e+00
   2.5111984e+01  -2.6801982e+01   1.5000000e+02  -1.0887262e+01   9.0946573e+00   6.0593023e+00
   2.5195681e+01  -2.6697780e+01   1.5000000e+02  -1.0660852e+01   8.6486837e+00   5.8920296e+00
   2.5274103e+01  -2.6590398e+01   1.5000000e+02  -1.0455598e+01   8.1822960e+00   5.6517724e+00
   2.5347112e+01  -2.6480045e+01   1.5000000e+02  -1.0268558e+01   7.7065081e+00   5.3412760e+00
   2.5414581e+01  -2.6366936e+01   1.5000000e+02  -1.0094488e+01   7.2317745e+00   4.9677955e+00
   2.5476398e+01  -2.6251292e+01   1.5000000e+02  -9.9274716e+00   6.7692909e+00   4.5419823e+00
   2.5532459e+01  -2.6133336e+01   1.5000000e+02  -9.7625223e+00   6.3323062e+00   4.0763095e+00
   2.5582675e+01  -2.6013296e+01   1.5000000e+02  -9.5966113e+00   5.9363881e+00   3.5832110e+00
   2.5626968e+01  -2.5891402e+01   1.5000000e+02  -9.4285666e+00   5.5984787e+00   3.0730377e+00
   2.5665272e+01  -2.5767889e+01   1.5000000e+02  -9.2577558e+00   5.3347902e+00   2.5526486e+00
   2.5697533e+01  -2.5642992e+01   1.5000000e+02  -9.0821729e+00   5.1580902e+00   2.0253186e+00
   2.5723708e+01  -2.5516949e+01   1.5000000e+02  -8.8972931e+00   5.0750238e+00   1.4922932e+00
   2.5743768e+01  -2.5390000e+01   1.5000000e+02  -8.6970557e+00   5.0840528e+00   9.5509044e-01
   2.5757695e+01  -2.5262384e+01   1.5000000e+02  -8.4772513e+00   5.1745445e+00   4.1671622e-01
   2.5765480e+01  -2.5134343e+01   1.5000000e+02  -8.2397344e+00   5.3271652e+00  -1.1987922e-01
   2.5767130e+01  -2.5006116e+01   1.5000000e+02  -7.9945067e+00   5.5154512e+00  -6.5622929e-01
   2.5762661e+01  -2.4877945e+01   1.5000000e+02  -7.7573292e+00   5.7083264e+00  -1.2034419e+00
   2.5752099e+01  -2.4750069e+01   1.5000000e+02  -7.5426438e+00   5.8729990e+00  -1.7846039e+00
   2.5735483e+01  -2.4622726e+01   1.5000000e+02  -7.3544455e+00   5.9778175e+00  -2.4317068e+00
   2.5712863e+01  -2.4496152e+01   1.5000000e+02  -7.1792420e+00   5.9948476e+00  -3.1769428e+00
   2.5684298e+01  -2.4370582e+01   1.5000000e+02  -6.9846840e+00   5.9019319e+00  -4.0409595e+00
   2.5649858e+01  -2.4246248e+01   1.5000000e+02  -6.7251078e+00   5.6841024e+00  -5.0223311e+00
   2.5609623e+01  -2.4123378e+01   1.5000000e+02  -6.3524526e+00   5.3343502e+00  -6.0921786e+00
   2.5563683e+01  -2.4002198e+01   1.5000000e+02  -5.8291744e+00   4.8537954e+00  -7.1959256e+00
   2.5512139e+01  -2.3882929e+01   1.5000000e+02  -5.1392736e+00   4.2512847e+00  -8.2620361e+00
   2.5455099e+01  -2.3765790e+01   1.5000000e+02  -4.2940692e+00   3.5424083e+00  -9.2155641e+00
   2.5392680e+01  -2.3650995e+01   1.5000000e+02  -3.3307335e+00   2.7477304e+00  -9.9928346e+00
   2.5325011e+01  -2.3538751e+01   1.5000000e+02  -2.3039069e+00   1.8903391e+00  -1.0552859e+01
   2.5252227e+01  -2.3429262e+01   1.5000000e+02  -1.2733039e+00   9.9313770e-01  -1.0882132e+01
   2.5174470e+01  -2.3322726e+01   1.5000000e+02  -2.9168898e-01   7.6475519e-02  -1.0992029e+01
   2.5091893e+01  -2.3219335e+01   1.5000000e+02   6.0309826e-01  -8.4319220e-01  -1.0910909e+01
   2.5004655e+01  -2.3119276e+01   1.5000000e+02   1.3907137e+00  -1.7534610e+00  -1.0674482e+01
   2.4912921e+01  -2.3022729e+01   1.5000000e+02   2.0662040e+00  -2.6451879e+00  -1.0317576e+01
   2.4816865e+01  -2.2929866e+01   1.5000000e+02   2.6351781e+00  -3.5112770e+00  -9.8689786e+00
   2.4716668e+01  -2.2840855e+01   1.5000000e+02   3.1082454e+00  -4.3456081e+00  -9.3495322e+00
   2.4612515e+01  -2.2755854e+01   1.5000000e+02   3.4960535e+00  -5.1424847e+00  -8.7727069e+00
   2.4504600e+01  -2.2675015e+01   1.5000000e+02   3.8056217e+00  -5.8965732e+00  -8.1468145e+00
   2.4393119e+01  -2.2598482e+01   1.5000000e+02   4.0385140e+00  -6.6035101e+00  -7.4778725e+00
   2.4278276e+01  -2.2526391e+01   1.5000000e+02   4.1910139e+00  -7.2609423e+00  -6.7722694e+00
   2.4160281e+01  -2.2458871e+01   1.5000000e+02   4.2562973e+00  -7.8698155e+00  -6.0382471e+00
   2.4039345e+01  -2.2396042e+01   1.5000000e+02   4.2279624e+00  -8.4353175e+00  -5.2855319e+00
   2.3915687e+01  -2.2338014e+01   1.5000000e+02   4.1038056e+00  -8.9667091e+00  -4.5232283e+00
   2.3789528e+01  -2.2284891e+01   1.5000000e+02   3.8886057e+00  -9.4756882e+00  -3.7568006e+00
   2.3661093e+01  -2.2236767e+01   1.5000000e+02   3.5949205e+00  -9.9733464e+00  -2.9857296e+00
   2.3530612e+01  -2.2193726e+01   1.5000000e+02   3.2417717e+00  -1.0466734e+01  -2.2033719e+00
   2.3398314e+01  -2.2155846e+01   1.5000000e+02   2.8519329e+00  -1.0956640e+01  -1.3994866e+00
   2.3264435e+01  -2.2123192e+01   1.5000000e+02   2.4489416e+00  -1.1437780e+01  -5.6449897e-01
   2.3129212e+01  -2.2095823e+01   1.5000000e+02   2.0547753e+00  -1.1901748e+01   3.0673554e-01
   2.2992881e+01  -2.2073786e+01   1.5000000e+02   1.6883424e+00  -1.2341322e+01   1.2135904e+00
   2.2855685e+01  -2.2057121e+01   1.5000000e+02   1.3646412e+00  -1.2754156e+01   2.1513619e+00
   2.2717864e+01  -2.2045857e+01   1.5000000e+02   1.0941285e+00  -1.3144236e+01   3.1153396e+00
   2.2579660e+01  -2.2040014e+01   1.5000000e+02   8.8239894e-01  -1.3520376e+01   4.1053169e+00
   2.2441316e+01  -2.2039602e+01   1.5000000e+02   7.3030367e-01  -1.3892254e+01   5.1289477e+00
   2.2303075e+01  -2.2044622e+01   1.5000000e+02   6.3480848e-01  -1.4265070e+01   6.2026838e+00
   2.2165180e+01  -2.2055065e+01   1.5000000e+02   5.9065649e-01  -1.4634253e+01   7.3496651e+00
   2.2027873e+01  -2.2070913e+01   1.5000000e+02   5.9268931e-01  -1.4981790e+01   8.5946775e+00
   2.1891396e+01  -2.2092137e+01   1.5000000e+02   6.3835841e-01  -1.5275549e+01   9.9570308e+00
   2.1755989e+01  -2.2118700e+01   1.5000000e+02   7.2986124e-01  -1.5472359e+01   1.1442983e+01
   2.1621891e+01  -2.2150556e+01   1.5000000e+02   8.7517227e-01  -1.5524679e+01   1.3039522e+01
   2.1489339e+01  -2.2187648e+01   1.5000000e+02   1.0875005e+00  -1.5389791e+01   1.4711371e+01
   2.1358566e+01  -2.2229911e+01   1.5000000e+02   1.3831732e+00  -1.5039614e+01   1.6402626e+01
   2.1229806e+01  -2.2277270e+01   1.5000000e+02   1.7783551e+00  -1.4468525e+01   1.8043283e+01
   2.1103288e+01  -2.2329641e+01   1.5000000e+02   2.2856046e+00  -1.3696601e+01   1.9559664e+01
   2.0979236e+01  -2.2386931e+01   1.5000000e+02   2.9112984e+00  -1.2766899e+01   2.0885677e+01
   2.0857874e+01  -2.2449039e+01   1.5000000e+02   3.6546299e+00  -1.1737551e+01   2.1971475e+01
   2.0739418e+01  -2.2515856e+01   1.5000000e+02   4.5081378e+00  -1.0671178e+01   2.2787194e+01
   2.0624084e+01  -2.2587261e+01   1.5000000e+02   5.4590568e+00  -9.6252788e+00   2.3321090e+01
   2.0512081e+01  -2.2663129e+01   1.5000000e+02   6.4907029e+00  -8.6460036e+00   2.3574046e+01
   2.0403611e+01  -2.2743324e+01   1.5000000e+02   7.5827472e+00  -7.7664466e+00   2.3553137e+01
   2.0298876e+01  -2.2827704e+01   1.5000000e+02   8.7107132e+00  -7.0086737e+00   2.3267108e+01
   2.0198066e+01  -2.2916117e+01   1.5000000e+02   9.8449710e+00  -6.3872322e+00   2.2725318e+01
   2.0101371e+01  -2.3008406e+01   1.5000000e+02   1.0950622e+01  -5.9125124e+00   2.1939785e+01
   2.0008971e+01  -2.3104406e+01   1.5000000e+02   1.1988701e+01  -5.5921355e+00   2.0928928e+01
   1.9921040e+01  -2.3203944e+01   1.5000000e+02   1.2919145e+01  -5.4304903e+00   1.9720853e+01
   1.9837745e+01  -2.3306841e+01   1.5000000e+02   1.3705007e+01  -5.4269600e+00   1.8354609e+01
   1.9759248e+01  -2.3412912e+01   1.5000000e+02   1.4317088e+01  -5.5740159e+00   1.6878809e+01
   1.9685700e+01  -2.3521966e+01   1.5000000e+02   1.4738170e+01  -5.8561083e+00   1.5347761e+01
   1.9617246e+01  -2.3633805e+01   1.5000000e+02   1.4966161e+01  -6.2500492e+00   1.3815695e+01
   1.9554023e+01  -2.3748227e+01   1.5000000e+02   1.5015224e+01  -6.7269146e+00   1.2329812e+01
   1.9496160e+01  -2.3865024e+01   1.5000000e+02   1.4913974e+01  -7.2551703e+00   1.0923423e+01
   1.9443775e+01  -2.3983984e+01   1.5000000e+02   1.4700282e+01  -7.8044107e+00   9.6107043e+00
   1.9396979e+01  -2.4104888e+01   1.5000000e+02   1.4413248e+01  -8.3488180e+00   8.3849572e+00
   1.9355873e+01  -2.4227516e+01   1.5000000e+02   1.4084042e+01  -8.8694783e+00   7.2215714e+00
   1.9320549e+01  -2.4351643e+01   1.5000000e+02   1.3728439e+01  -9.3548846e+00   6.0858452e+00
   1.9291088e+01  -2.4477041e+01   1.5000000e+02   1.3343624e+01  -9.7996507e+00   4.9437024e+00
   1.9267562e+01  -2.4603478e+01   1.5000000e+02   1.2910634e+01  -1.0201976e+01   3.7722153e+00
   1.9250032e+01  -2.4730719e+01   1.5000000e+02   1.2401667e+01  -1.0560841e+01   2.5665954e+00
   1.9238550e+01  -2.4858530e+01   1.5000000e+02   1.1789618e+01  -1.0874024e+01   1.3414771e+00
   1.9233154e+01  -2.4986671e+01   1.5000000e+02   1.1056430e+01  -1.1137571e+01   1.2686614e-01
   1.9233875e+01  -2.5114905e+01   1.5000000e+02   1.0197599e+01  -1.1346979e+01  -1.0394760e+00
   1.9240730e+01  -2.5242990e+01   1.5000000e+02   9.2223016e+00  -1.1499411e+01  -2.1194782e+00
   1.9253725e+01  -2.5370685e+01   1.5000000e+02   8.1504809e+00  -1.1596243e+01  -3.0802240e+00
   1.9272856e+01  -2.5497751e+01   1.5000000e+02   7.0093178e+00  -1.1644965e+01  -3.8966661e+00
   1.9298106e+01  -2.5623947e+01   1.5000000e+02   5.8308152e+00  -1.1659817e+01  -4.5529248e+00
   1.9329446e+01  -2.5749033e+01   1.5000000e+02   4.6503864e+00  -1.1660796e+01  -5.0440686e+00
   1.9366837e+01  -2.5872771e+01   1.5000000e+02   3.5051703e+00  -1.1670921e+01  -5.3788875e+00
   1.9410225e+01  -2.5994925e+01   1.5000000e+02   2.4306815e+00  -1.1711997e+01  -5.5824920e+00
   1.9459548e+01  -2.6115262e+01   1.5000000e+02   1.4555739e+00  -1.1799544e+01  -5.6967338e+00
   1.9514729e+01  -2.6233549e+01   1.5000000e+02   5.9589238e-01  -1.1937983e+01  -5.7764175e+00
   1.9575679e+01  -2.6349558e+01   1.5000000e+02  -1.4905549e-01  -1.2117428e+01  -5.8812076e+00
   1.9642298e+01  -2.6463065e+01   1.5000000e+02  -7.9708625e-01  -1.2313232e+01  -6.0648200e+00
   1.9948419e+01  -2.7071110e+01   1.5000000e+02  -3.7973873e+00  -1.2122445e+01  -7.0829078e+00
   2.0046386e+01  -2.7165472e+01   1.5000000e+02  -4.3780211e+00  -1.1754023e+01  -7.7727268e+00
   2.0148837e+01  -2.7256058e+01   1.5000000e+02  -4.9786536e+00  -1.1262332e+01  -8.4418311e+00
   2.0255598e+01  -2.7342702e+01   1.5000000e+02  -5.5755349e+00  -1.0672548e+01  -9.0673424e+00
   2.0366482e+01  -2.7425244e+01   1.5000000e+02  -6.1415790e+00  -1.0011353e+01  -9.6425271e+00
   2.0481296e+01  -2.7503533e+01   1.5000000e+02  -6.6513829e+00  -9.2985321e+00  -1.0174623e+01
   2.0599836e+01  -2.7577424e+01   1.5000000e+02  -7.0852909e+00  -8.5408816e+00  -1.0678252e+01
   2.0721891e+01  -2.7646780e+01   1.5000000e+02  -7.4319446e+00  -7.7304862e+00  -1.1166349e+01
   2.0847241e+01  -2.7711473e+01   1.5000000e+02  -7.6888365e+00  -6.8483130e+00  -1.1641344e+01
   2.0975661e+01  -2.7771382e+01   1.5000000e+02  -7.8608497e+00  -5.8720404e+00  -1.2089794e+01
   2.1106917e+01  -2.7826395e+01   1.5000000e+02  -7.9573278e+00  -4.7853868e+00  -1.2482577e+01
   2.1240769e+01  -2.7876411e+01   1.5000000e+02  -7.9888443e+00  -3.5851876e+00  -1.2780983e+01
   2.1376971e+01  -2.7921334e+01   1.5000000e+02  -7.9650740e+00  -2.2833105e+00  -1.2946341e+01
   2.1515271e+01  -2.7961082e+01   1.5000000e+02  -7.8948078e+00  -9.0268257e-01  -1.2948987e+01
   2.1655413e+01  -2.7995579e+01   1.5000000e+02  -7.7880253e+00   5.3044067e-01  -1.2772625e+01
   2.1797138e+01  -2.8024762e+01   1.5000000e+02  -7.6589043e+00   1.9937185e+00  -1.2412200e+01
   2.1940180e+01  -2.8048574e+01   1.5000000e+02  -7.5279874e+00   3.4713710e+00  -1.1867098e+01
   2.2084271e+01  -2.8066971e+01   1.5000000e+02  -7.4220010e+00   4.9506471e+00  -1.1133963e+01
   2.2229144e+01  -2.8079920e+01   1.5000000e+02  -7.3707505e+00   6.4138096e+00  -1.0203926e+01
   2.2374524e+01  -2.8087394e+01   1.5000000e+02  -7.4017943e+00   7.8300949e+00  -9.0668131e+00
   2.2520141e+01  -2.8089380e+01   1.5000000e+02  -7.5346336e+00   9.1530468e+00  -7.7208250e+00
   2.2665719e+01  -2.8085875e+01   1.5000000e+02  -7.7766012e+00   1.0325442e+01  -6.1833294e+00
   2.2810986e+01  -2.8076885e+01   1.5000000e+02  -8.1217907e+00   1.1290875e+01  -4.4970388e+00
   2.2955670e+01  -2.8062427e+01   1.5000000e+02  -8.5527948e+00   1.2007177e+01  -2.7286898e+00
   2.3099498e+01  -2.8042528e+01   1.5000000e+02  -9.0439365e+00   1.2456916e+01  -9.6034780e-01
   2.3242202e+01  -2.8017226e+01   1.5000000e+02  -9.5647468e+00   1.2651763e+01   7.2399463e-01
   2.3383515e+01  -2.7986567e+01   1.5000000e+02  -1.0083321e+01   1.2629686e+01   2.2525004e+00
   2.3523174e+01  -2.7950611e+01   1.5000000e+02  -1.0569720e+01   1.2446104e+01   3.5765356e+00
   2.3660920e+01  -2.7909424e+01   1.5000000e+02  -1.0999368e+01   1.2161840e+01   4.6752666e+00
   2.3796496e+01  -2.7863083e+01   1.5000000e+02  -1.1355452e+01   1.1831951e+01   5.5532418e+00
   2.3929654e+01  -2.7811676e+01   1.5000000e+02  -1.1629596e+01   1.1498419e+01   6.2331758e+00
   2.4060150e+01  -2.7755298e+01   1.5000000e+02  -1.1820719e+01   1.1187467e+01   6.7472246e+00
   2.4187744e+01  -2.7694055e+01   1.5000000e+02  -1.1932839e+01   1.0910259e+01   7.1296530e+00
   2.4312205e+01  -2.7628060e+01   1.5000000e+02  -1.1972879e+01   1.0665454e+01   7.4116381e+00
   2.4433310e+01  -2.7557436e+01   1.5000000e+02  -1.1949072e+01   1.0442659e+01   7.6182161e+00
   2.4550840e+01  -2.7482315e+01   1.5000000e+02  -1.1870225e+01   1.0226212e+01   7.7669322e+00
   2.4664587e+01  -2.7402835e+01   1.5000000e+02  -1.1745634e+01   9.9988624e+00   7.8678521e+00
   2.4774350e+01  -2.7319142e+01   1.5000000e+02  -1.1585366e+01   9.7451505e+00   7.9243114e+00
   2.4879937e+01  -2.7231392e+01   1.5000000e+02  -1.1400415e+01   9.4542401e+00   7.9341835e+00
   2.4981165e+01  -2.7139745e+01   1.5000000e+02  -1.1202415e+01   9.1218680e+00   7.8915333e+00
   2.5077861e+01  -2.7044369e+01   1.5000000e+02  -1.1002779e+01   8.7507117e+00   7.7888434e+00
   2.5169861e+01  -2.6945437e+01   1.5000000e+02  -1.0811563e+01   8.3489196e+00   7.6192124e+00
   2.5257010e+01  -2.6843131e+01   1.5000000e+02  -1.0636284e+01   7.9271960e+00   7.3780322e+00
   2.5339165e+01  -2.6737636e+01   1.5000000e+02  -1.0480866e+01   7.4957000e+00   7.0636623e+00
   2.5416191e+01  -2.6629143e+01   1.5000000e+02  -1.0344864e+01   7.0621319e+00   6.6774718e+00
   2.5487966e+01  -2.6517847e+01   1.5000000e+02  -1.0223256e+01   6.6316368e+00   6.2238575e+00
   2.5554375e+01  -2.6403948e+01   1.5000000e+02  -1.0107240e+01   6.2083914e+00   5.7105653e+00
   2.5615318e+01  -2.6287652e+01   1.5000000e+02  -9.9861630e+00   5.7977140e+00   5.1491431e+00
   2.5670702e+01  -2.6169165e+01   1.5000000e+02  -9.8501738e+00   5.4078062e+00   4.5546785e+00
   2.5720446e+01  -2.6048698e+01   1.5000000e+02  -9.6926740e+00   5.0501812e+00   3.9445048e+00
   2.5764481e+01  -2.5926466e+01   1.5000000e+02  -9.5115436e+00   4.7387457e+00   3.3358044e+00
   2.5802745e+01  -2.5802684e+01   1.5000000e+02  -9.3086061e+00   4.4878197e+00   2.7429567e+00
   2.5835191e+01  -2.5677571e+01   1.5000000e+02  -9.0877036e+00   4.3095778e+00   2.1758110e+00
   2.5861780e+01  -2.5551347e+01   1.5000000e+02  -8.8526003e+00   4.2117130e+00   1.6395858e+00
   2.5882485e+01  -2.5424232e+01   1.5000000e+02  -8.6063321e+00   4.1956851e+00   1.1361963e+00
   2.5897288e+01  -2.5296449e+01   1.5000000e+02  -8.3528469e+00   4.2559251e+00   6.6555207e-01
   2.5906183e+01  -2.5168220e+01   1.5000000e+02  -8.1000113e+00   4.3799542e+00   2.2495229e-01
   2.5909172e+01  -2.5039767e+01   1.5000000e+02  -7.8615310e+00   4.5493282e+00  -1.9405293e-01
   2.5906269e+01  -2.4911313e+01   1.5000000e+02  -7.6551910e+00   4.7410800e+00  -6.0993037e-01
   2.5897498e+01  -2.4783078e+01   1.5000000e+02  -7.4966425e+00   4.9294973e+00  -1.0535223e+00
   2.5882891e+01  -2.4655284e+01   1.5000000e+02  -7.3906382e+00   5.0879688e+00  -1.5655367e+00
   2.5862492e+01  -2.4528148e+01   1.5000000e+02  -7.3234996e+00   5.1907307e+00  -2.1883086e+00
   2.5836353e+01  -2.4401889e+01   1.5000000e+02  -7.2606784e+00   5.2145253e+00  -2.9537460e+00
   2.5804534e+01  -2.4276721e+01   1.5000000e+02  -7.1512355e+00   5.1401091e+00  -3.8715865e+00
   2.5767107e+01  -2.4152857e+01   1.5000000e+02  -6.9383319e+00   4.9536088e+00  -4.9220788e+00
   2.5724151e+01  -2.4030507e+01   1.5000000e+02  -6.5726100e+00   4.6476942e+00  -6.0558360e+00
   2.5675754e+01  -2.3909876e+01   1.5000000e+02  -6.0246503e+00   4.2223080e+00  -7.2010550e+00
   2.5622011e+01  -2.3791169e+01   1.5000000e+02  -5.2930502e+00   3.6847910e+00  -8.2764098e+00
   2.5563027e+01  -2.3674584e+01   1.5000000e+02  -4.4056714e+00   3.0490176e+00  -9.2065146e+00
   2.5498915e+01  -2.3560318e+01   1.5000000e+02  -3.4134797e+00   2.3335547e+00  -9.9356317e+00
   2.5429794e+01  -2.3448561e+01   1.5000000e+02  -2.3787958e+00   1.5589899e+00  -1.0435784e+01
   2.5355792e+01  -2.3339499e+01   1.5000000e+02  -1.3620664e+00   7.4523481e-01  -1.0707168e+01
   2.5277042e+01  -2.3233315e+01   1.5000000e+02  -4.1126535e-01  -9.0511284e-02  -1.0771968e+01
   2.5193686e+01  -2.3130184e+01   1.5000000e+02   4.4347952e-01  -9.3466417e-01  -1.0664633e+01
   2.5105873e+01  -2.3030278e+01   1.5000000e+02   1.1898552e+00  -1.7769447e+00  -1.0422210e+01
   2.5013755e+01  -2.2933761e+01   1.5000000e+02   1.8295454e+00  -2.6093390e+00  -1.0077179e+01
   2.4917495e+01  -2.2840793e+01   1.5000000e+02   2.3725578e+00  -3.4247181e+00  -9.6537619e+00
   2.4817258e+01  -2.2751528e+01   1.5000000e+02   2.8315986e+00  -4.2158087e+00  -9.1674013e+00
   2.4713215e+01  -2.2666113e+01   1.5000000e+02   3.2173747e+00  -4.9746447e+00  -8.6265447e+00
   2.4605544e+01  -2.2584686e+01   1.5000000e+02   3.5354379e+00  -5.6927137e+00  -8.0358023e+00
   2.4494428e+01  -2.2507383e+01   1.5000000e+02   3.7848659e+00  -6.3618631e+00  -7.3995904e+00
   2.4380052e+01  -2.2434330e+01   1.5000000e+02   3.9589400e+00  -6.9760233e+00  -6.7251551e+00
   2.4262609e+01  -2.2365647e+01   1.5000000e+02   4.0476626e+00  -7.5333189e+00  -6.0240614e+00
   2.4142293e+01  -2.2301445e+01   1.5000000e+02   4.0415387e+00  -8.0379936e+00  -5.3112370e+00
   2.4019305e+01  -2.2241829e+01   1.5000000e+02   3.9354973e+00  -8.5010415e+00  -4.6017296e+00
   2.3893846e+01  -2.2186898e+01   1.5000000e+02   3.7317361e+00  -8.9388576e+00  -3.9061036e+00
   2.3766125e+01  -2.2136739e+01   1.5000000e+02   3.4405441e+00  -9.3696557e+00  -3.2264608e+00
   2.3636349e+01  -2.2091435e+01   1.5000000e+02   3.0789834e+00  -9.8087159e+00  -2.5550118e+00
   2.3504731e+01  -2.2051060e+01   1.5000000e+02   2.6681261e+00  -1.0264106e+01  -1.8762615e+00
   2.3371486e+01  -2.2015679e+01   1.5000000e+02   2.2300779e+00  -1.0734895e+01  -1.1720498e+00
   2.3236830e+01  -2.1985350e+01   1.5000000e+02   1.7858077e+00  -1.1212686e+01  -4.2725693e-01
   2.3100982e+01  -2.1960121e+01   1.5000000e+02   1.3540502e+00  -1.1685743e+01   3.6635107e-01
   2.2964163e+01  -2.1940034e+01   1.5000000e+02   9.5090883e-01  -1.2143824e+01   1.2096132e+00
   2.2826593e+01  -2.1925122e+01   1.5000000e+02   5.8951599e-01  -1.2581680e+01   2.0985998e+00
   2.2688496e+01  -2.1915408e+01   1.5000000e+02   2.7951251e-01  -1.2999966e+01   3.0288907e+00
   2.2550094e+01  -2.1910909e+01   1.5000000e+02   2.6482272e-02  -1.3403539e+01   3.9999226e+00
   2.2411611e+01  -2.1911631e+01   1.5000000e+02  -1.6828414e-01  -1.3797666e+01   5.0178443e+00
   2.2273271e+01  -2.1917574e+01   1.5000000e+02  -3.0727322e-01  -1.4183277e+01   6.0961540e+00
   2.2135297e+01  -2.1928727e+01   1.5000000e+02  -3.9546720e-01  -1.4552448e+01   7.2536305e+00
   2.1997912e+01  -2.1945073e+01   1.5000000e+02  -4.3832586e-01  -1.4885476e+01   8.5098028e+00
   2.1861340e+01  -2.1966586e+01   1.5000000e+02  -4.3952850e-01  -1.5150679e+01   9.8787799e+00
   2.1725799e+01  -2.1993229e+01   1.5000000e+02  -3.9896258e-01  -1.5307455e+01   1.1362920e+01
   2.1591512e+01  -2.2024961e+01   1.5000000e+02  -3.1143304e-01  -1.5312361e+01   1.2947662e+01
   2.1458695e+01  -2.2061730e+01   1.5000000e+02  -1.6678536e-01  -1.5127303e+01   1.4599304e+01
   2.1327566e+01  -2.2103475e+01   1.5000000e+02   4.8661806e-02  -1.4728183e+01   1.6266530e+01
   2.1198337e+01  -2.2150129e+01   1.5000000e+02   3.4959351e-01  -1.4111737e+01   1.7886410e+01
   2.1071220e+01  -2.2201616e+01   1.5000000e+02   7.4879167e-01  -1.3298320e+01   1.9393454e+01
   2.0946424e+01  -2.2257853e+01   1.5000000e+02   1.2547958e+00  -1.2329388e+01   2.0729514e+01
   2.0824155e+01  -2.2318747e+01   1.5000000e+02   1.8707007e+00  -1.1260297e+01   2.1851362e+01
   2.0704614e+01  -2.2384199e+01   1.5000000e+02   2.5943469e+00  -1.0150765e+01   2.2733827e+01
   2.0588000e+01  -2.2454103e+01   1.5000000e+02   3.4193230e+00  -9.0560150e+00   2.3367993e+01
   2.0474506e+01  -2.2528343e+01   1.5000000e+02   4.3359509e+00  -8.0208743e+00   2.3755923e+01
   2.0364324e+01  -2.2606800e+01   1.5000000e+02   5.3316717e+00  -7.0779540e+00   2.3904330e+01
   2.0257639e+01  -2.2689343e+01   1.5000000e+02   6.3901372e+00  -6.2491261e+00   2.3819722e+01
   2.0154632e+01  -2.2775838e+01   1.5000000e+02   7.4899211e+00  -5.5489558e+00   2.3506662e+01
   2.0055477e+01  -2.2866142e+01   1.5000000e+02   8.6032617e+00  -4.9880022e+00   2.2969371e+01
   1.9960346e+01  -2.2960106e+01   1.5000000e+02   9.6962136e+00  -4.5747609e+00   2.2215566e+01
   1.9869404e+01  -2.3057577e+01   1.5000000e+02   1.0730539e+01  -4.3155943e+00   2.1260593e+01
   1.9782808e+01  -2.3158392e+01   1.5000000e+02   1.1667087e+01  -4.2131934e+00   2.0130181e+01
   1.9700711e+01  -2.3262384e+01   1.5000000e+02   1.2470265e+01  -4.2646487e+00   1.8860702e+01
   1.9623261e+01  -2.3369382e+01   1.5000000e+02   1.3112416e+01  -4.4599913e+00   1.7496982e+01
   1.9550595e+01  -2.3479208e+01   1.5000000e+02   1.3577476e+01  -4.7818496e+00   1.6088247e+01
   1.9482847e+01  -2.3591678e+01   1.5000000e+02   1.3863550e+01  -5.2065590e+00   1.4682763e+01
   1.9420141e+01  -2.3706605e+01   1.5000000e+02   1.3983592e+01  -5.7063808e+00   1.3321832e+01
   1.9362596e+01  -2.3823796e+01   1.5000000e+02   1.3963644e+01  -6.2525391e+00   1.2034039e+01
   1.9310322e+01  -2.3943055e+01   1.5000000e+02   1.3838207e+01  -6.8184579e+00   1.0830850e+01
   1.9263420e+01  -2.4064182e+01   1.5000000e+02   1.3643116e+01  -7.3825033e+00   9.7051019e+00
   1.9221985e+01  -2.4186972e+01   1.5000000e+02   1.3407419e+01  -7.9295726e+00   8.6334807e+00
   1.9186102e+01  -2.4311218e+01   1.5000000e+02   1.3146446e+01  -8.4510675e+00   7.5830967e+00
   1.9155847e+01  -2.4436709e+01   1.5000000e+02   1.2858485e+01  -8.9432811e+00   6.5208548e+00
   1.9131290e+01  -2.4563232e+01   1.5000000e+02   1.2526398e+01  -9.4047971e+00   5.4229034e+00
   1.9112488e+01  -2.4690571e+01   1.5000000e+02   1.2123701e+01  -9.8337263e+00   4.2814002e+00
   1.9099491e+01  -2.4818509e+01   1.5000000e+02   1.1623086e+01  -1.0225904e+01   3.1063247e+00
   1.9092340e+01  -2.4946827e+01   1.5000000e+02   1.1004240e+01  -1.0574520e+01   1.9224167e+00
   1.9091065e+01  -2.5075303e+01   1.5000000e+02   1.0258502e+01  -1.0871300e+01   7.6295819e-01
   1.9095686e+01  -2.5203716e+01   1.5000000e+02   9.3894968e+00  -1.1108768e+01  -3.3687624e-01
   1.9106215e+01  -2.5331844e+01   1.5000000e+02   8.4108755e+00  -1.1282811e+01  -1.3446648e+00
   1.9122651e+01  -2.5459465e+01   1.5000000e+02   7.3433341e+00  -1.1394843e+01  -2.2327461e+00
   1.9144986e+01  -2.5586355e+01   1.5000000e+02   6.2127990e+00  -1.1453112e+01  -2.9789039e+00
   1.9173198e+01  -2.5712294e+01   1.5000000e+02   5.0499929e+00  -1.1472791e+01  -3.5674986e+00
   1.9207258e+01  -2.5837061e+01   1.5000000e+02   3.8903196e+00  -1.1474717e+01  -3.9924593e+00
   1.9247123e+01  -2.5960436e+01   1.5000000e+02   2.7721339e+00  -1.1482619e+01  -4.2614687e+00
   1.9292743e+01  -2.6082202e+01   1.5000000e+02   1.7324778e+00  -1.1519031e+01  -4.3995362e+00
   1.9344055e+01  -2.6202142e+01   1.5000000e+02   8.0091410e-01  -1.1600396e+01  -4.4493065e+00
   1.9400984e+01  -2.6320044e+01   1.5000000e+02  -6.7393827e-03  -1.1732417e+01  -4.4667722e+00
   1.9463449e+01  -2.6435698e+01   1.5000000e+02  -6.9225895e-01  -1.1906958e+01  -4.5126881e+00
   1.9531353e+01  -2.6548897e+01   1.5000000e+02  -1.2748368e+00  -1.2101559e+01  -4.6415782e+00
   1.9604592e+01  -2.6659438e+01   1.5000000e+02  -1.7865982e+00  -1.2282154e+01  -4.8917173e+00
   1.9683050e+01  -2.6767121e+01   1.5000000e+02  -2.2651252e+00  -1.2408605e+01  -5.2786377e+00
   1.9766599e+01  -2.6871753e+01   1.5000000e+02  -2.7452385e+00  -1.2441987e+01  -5.7938525e+00
   1.9855105e+01  -2.6973144e+01   1.5000000e+02  -3.2521451e+00  -1.2351964e+01  -6.4088686e+00
   2.0276273e+01  -2.7525541e+01   1.5000000e+02  -6.1442104e+00  -9.9937437e+00  -8.3048237e+00
   2.0391263e+01  -2.7604104e+01   1.5000000e+02  -6.6769336e+00  -9.3816472e+00  -8.8749838e+00
   2.0509864e+01  -2.7678433e+01   1.5000000e+02  -7.1453244e+00  -8.7428157e+00  -9.4250293e+00
   2.0631879e+01  -2.7748401e+01   1.5000000e+02  -7.5334303e+00  -8.0675217e+00  -9.9741092e+00
   2.0757106e+01  -2.7813887e+01   1.5000000e+02  -7.8342065e+00  -7.3319173e+00  -1.0532069e+01
   2.0885336e+01  -2.7874777e+01   1.5000000e+02  -8.0485809e+00  -6.5057872e+00  -1.1091707e+01
   2.1016352e+01  -2.7930967e+01   1.5000000e+02  -8.1825240e+00  -5.5629125e+00  -1.1626685e+01
   2.1149934e+01  -2.7982360e+01   1.5000000e+02  -8.2433710e+00  -4.4901320e+00  -1.2096389e+01
   2.1285852e+01  -2.8028866e+01   1.5000000e+02  -8.2371671e+00  -3.2915174e+00  -1.2455888e+01
   2.1423876e+01  -2.8070404e+01   1.5000000e+02  -8.1684032e+00  -1.9857340e+00  -1.2666920e+01
   2.1563767e+01  -2.8106902e+01   1.5000000e+02  -8.0423487e+00  -5.9828123e-01  -1.2704770e+01
   2.1705286e+01  -2.8138297e+01   1.5000000e+02  -7.8688034e+00   8.4760800e-01  -1.2558119e+01
   2.1848187e+01  -2.8164533e+01   1.5000000e+02  -7.6653621e+00   2.3361854e+00  -1.2222335e+01
   2.1992222e+01  -2.8185565e+01   1.5000000e+02  -7.4583642e+00   3.8576147e+00  -1.1690396e+01
   2.2137143e+01  -2.8201357e+01   1.5000000e+02  -7.2805858e+00   5.3998238e+00  -1.0947084e+01
   2.2282695e+01  -2.8211879e+01   1.5000000e+02  -7.1659722e+00   6.9377615e+00  -9.9708339e+00
   2.2428627e+01  -2.8217116e+01   1.5000000e+02  -7.1428746e+00   8.4264269e+00  -8.7435915e+00
   2.2574683e+01  -2.8217055e+01   1.5000000e+02  -7.2281985e+00   9.8022153e+00  -7.2646827e+00
   2.2720608e+01  -2.8211700e+01   1.5000000e+02  -7.4245410e+00   1.0993598e+01  -5.5618166e+00
   2.2866149e+01  -2.8201057e+01   1.5000000e+02  -7.7211669e+00   1.1936748e+01  -3.6938995e+00
   2.3011052e+01  -2.8185146e+01   1.5000000e+02  -8.0975955e+00   1.2589977e+01  -1.7447333e+00
   2.3155065e+01  -2.8163996e+01   1.5000000e+02  -8.5278769e+00   1.2942476e+01   1.8979481e-01
   2.3297937e+01  -2.8137642e+01   1.5000000e+02  -8.9840394e+00   1.3015731e+01   2.0169098e+00
   2.3439422e+01  -2.8106131e+01   1.5000000e+02  -9.4385106e+00   1.2858169e+01   3.6611735e+00
   2.3579274e+01  -2.8069518e+01   1.5000000e+02  -9.8662266e+00   1.2534543e+01   5.0743630e+00
   2.3717252e+01  -2.8027866e+01   1.5000000e+02  -1.0246776e+01   1.2113030e+01   6.2388497e+00
   2.3853120e+01  -2.7981249e+01   1.5000000e+02  -1.0566136e+01   1.1653724e+01   7.1639442e+00
   2.3986646e+01  -2.7929747e+01   1.5000000e+02  -1.0817359e+01   1.1201368e+01   7.8774507e+00
   2.4117601e+01  -2.7873449e+01   1.5000000e+02  -1.0999841e+01   1.0782953e+01   8.4160135e+00
   2.4245765e+01  -2.7812453e+01   1.5000000e+02  -1.1117640e+01   1.0408991e+01   8.8168937e+00
   2.4370922e+01  -2.7746865e+01   1.5000000e+02  -1.1177596e+01   1.0076932e+01   9.1122019e+00
   2.4492862e+01  -2.7676797e+01   1.5000000e+02  -1.1187756e+01   9.7754225e+00   9.3258427e+00
   2.4611383e+01  -2.7602370e+01   1.5000000e+02  -1.1156287e+01   9.4885839e+00   9.4727873e+00
   2.4726290e+01  -2.7523713e+01   1.5000000e+02  -1.1090956e+01   9.1998590e+00   9.5599483e+00
   2.4837393e+01  -2.7440959e+01   1.5000000e+02  -1.0999082e+01   8.8952525e+00   9.5879908e+00
   2.4944514e+01  -2.7354250e+01   1.5000000e+02  -1.0887706e+01   8.5657679e+00   9.5537307e+00
   2.5047479e+01  -2.7263734e+01   1.5000000e+02  -1.0763958e+01   8.2089855e+00   9.4524566e+00
   2.5146126e+01  -2.7169566e+01   1.5000000e+02  -1.0635275e+01   7.8290689e+00   9.2801977e+00
   2.5240299e+01  -2.7071903e+01   1.5000000e+02  -1.0509432e+01   7.4351223e+00   9.0351587e+00
   2.5329851e+01  -2.6970912e+01   1.5000000e+02  -1.0394083e+01   7.0380398e+00   8.7181561e+00
   2.5414645e+01  -2.6866763e+01   1.5000000e+02  -1.0295682e+01   6.6471227e+00   8.3317290e+00
   2.5494552e+01  -2.6759630e+01   1.5000000e+02  -1.0217748e+01   6.2677382e+00   7.8788149e+00
   2.5569454e+01  -2.6649693e+01   1.5000000e+02  -1.0158936e+01   5.9008990e+00   7.3620765e+00
   2.5639242e+01  -2.6537136e+01   1.5000000e+02  -1.0111900e+01   5.5448484e+00   6.7846180e+00
   2.5703813e+01  -2.6422145e+01   1.5000000e+02  -1.0063834e+01   5.1977492e+00   6.1520150e+00
   2.5763079e+01  -2.6304912e+01   1.5000000e+02  -9.9989970e+00   4.8601965e+00   5.4746148e+00
   2.5816957e+01  -2.6185630e+01   1.5000000e+02  -9.9025521e+00   4.5368007e+00   4.7685510e+00
   2.5865377e+01  -2.6064495e+01   1.5000000e+02  -9.7643157e+00   4.2361755e+00   4.0547723e+00
   2.5908276e+01  -2.5941708e+01   1.5000000e+02  -9.5810321e+00   3.9696899e+00   3.3561135e+00
   2.5945602e+01  -2.5817467e+01   1.5000000e+02  -9.3563457e+00   3.7493560e+00   2.6934287e+00
   2.5977311e+01  -2.5691977e+01   1.5000000e+02  -9.0987422e+00   3.5856189e+00   2.0824452e+00
   2.6003372e+01  -2.5565441e+01   1.5000000e+02  -8.8186931e+00   3.4855275e+00   1.5323463e+00
   2.6023759e+01  -2.5438065e+01   1.5000000e+02  -8.5268709e+00   3.4516974e+00   1.0463850e+00
   2.6038458e+01  -2.5310053e+01   1.5000000e+02  -8.2345728e+00   3.4819259e+00   6.2306481e-01
   2.6047463e+01  -2.5181612e+01   1.5000000e+02  -7.9558399e+00   3.5693607e+00   2.5606242e-01
   2.6050779e+01  -2.5052948e+01   1.5000000e+02  -7.7089344e+00   3.7029192e+00  -6.8215537e-02
   2.6048417e+01  -2.4924267e+01   1.5000000e+02  -7.5146048e+00   3.8678966e+00  -3.7429495e-01
   2.6040400e+01  -2.4795773e+01   1.5000000e+02  -7.3901026e+00   4.0466326e+00  -6.9969125e-01
   2.6026758e+01  -2.4667672e+01   1.5000000e+02  -7.3406155e+00   4.2193099e+00  -1.0923698e+00
   2.6007529e+01  -2.4540166e+01   1.5000000e+02  -7.3517087e+00   4.3647772e+00  -1.6025432e+00
   2.5982761e+01  -2.4413457e+01   1.5000000e+02  -7.3866008e+00   4.4614525e+00  -2.2704179e+00
   2.5952508e+01  -2.4287744e+01   1.5000000e+02  -7.3902772e+00   4.4885238e+00  -3.1138159e+00
   2.5916835e+01  -2.4163224e+01   1.5000000e+02  -7.2997751e+00   4.4274964e+00  -4.1198589e+00
   2.5875813e+01  -2.4040093e+01   1.5000000e+02  -7.0577620e+00   4.2641220e+00  -5.2436253e+00
   2.5829521e+01  -2.3918543e+01   1.5000000e+02  -6.6256966e+00   3.9902626e+00  -6.4143618e+00
   2.5778045e+01  -2.3798764e+01   1.5000000e+02  -5.9931406e+00   3.6052269e+00  -7.5478207e+00
   2.5721479e+01  -2.3680941e+01   1.5000000e+02  -5.1806683e+00   3.1159881e+00  -8.5618977e+00
   2.5659924e+01  -2.3565257e+01   1.5000000e+02  -4.2353114e+00   2.5360084e+00  -9.3915489e+00
   2.5593487e+01  -2.3451890e+01   1.5000000e+02  -3.2196810e+00   1.8827903e+00  -9.9989219e+00
   2.5522283e+01  -2.3341017e+01   1.5000000e+02  -2.1983422e+00   1.1749354e+00  -1.0375959e+01
   2.5446433e+01  -2.3232808e+01   1.5000000e+02  -1.2256868e+00   4.2954477e-01  -1.0539724e+01
   2.5366063e+01  -2.3127428e+01   1.5000000e+02  -3.3863735e-01  -3.3927648e-01  -1.0523052e+01
   2.5281307e+01  -2.3025039e+01   1.5000000e+02   4.4498930e-01  -1.1206496e+00  -1.0364203e+01
   2.5192303e+01  -2.2925798e+01   1.5000000e+02   1.1236423e+00  -1.9061812e+00  -1.0098373e+01
   2.5099196e+01  -2.2829857e+01   1.5000000e+02   1.7066209e+00  -2.6886462e+00  -9.7525169e+00
   2.5002135e+01  -2.2737362e+01   1.5000000e+02   2.2080638e+00  -3.4606529e+00  -9.3436357e+00
   2.4901275e+01  -2.2648453e+01   1.5000000e+02   2.6416167e+00  -4.2136276e+00  -8.8798912e+00
   2.4796777e+01  -2.2563265e+01   1.5000000e+02   3.0164977e+00  -4.9373735e+00  -8.3636286e+00
   2.4688803e+01  -2.2481928e+01   1.5000000e+02   3.3352477e+00  -5.6203889e+00  -7.7953934e+00
   2.4577524e+01  -2.2404565e+01   1.5000000e+02   3.5932557e+00  -6.2510488e+00  -7.1780893e+00
   2.4463110e+01  -2.2331292e+01   1.5000000e+02   3.7801936e+00  -6.8198478e+00  -6.5201959e+00
   2.4345741e+01  -2.2262222e+01   1.5000000e+02   3.8830337e+00  -7.3222418e+00  -5.8370011e+00
   2.4225595e+01  -2.2197457e+01   1.5000000e+02   3.8900443e+00  -7.7614331e+00  -5.1488728e+00
   2.4102858e+01  -2.2137095e+01   1.5000000e+02   3.7946146e+00  -8.1496768e+00  -4.4769043e+00
   2.3977715e+01  -2.2081227e+01   1.5000000e+02   3.5978026e+00  -8.5072274e+00  -3.8369271e+00
   2.3850358e+01  -2.2029938e+01   1.5000000e+02   3.3088124e+00  -8.8584482e+00  -3.2342199e+00
   2.3720978e+01  -2.1983304e+01   1.5000000e+02   2.9433697e+00  -9.2260513e+00  -2.6610732e+00
   2.3589772e+01  -2.1941395e+01   1.5000000e+02   2.5208537e+00  -9.6253476e+00  -2.0986622e+00
   2.3456937e+01  -2.1904275e+01   1.5000000e+02   2.0613897e+00  -1.0060867e+01  -1.5225466e+00
   2.3322672e+01  -2.1871998e+01   1.5000000e+02   1.5839437e+00  -1.0526630e+01  -9.0958348e-01
   2.3187180e+01  -2.1844614e+01   1.5000000e+02   1.1057178e+00  -1.1009786e+01  -2.4339738e-01
   2.3050662e+01  -2.1822163e+01   1.5000000e+02   6.4226327e-01  -1.1495805e+01   4.8354018e-01
   2.2913322e+01  -2.1804679e+01   1.5000000e+02   2.0766039e-01  -1.1972984e+01   1.2712695e+00
   2.2775366e+01  -2.1792188e+01   1.5000000e+02  -1.8585010e-01  -1.2434845e+01   2.1159898e+00
   2.2637000e+01  -2.1784709e+01   1.5000000e+02  -5.2871452e-01  -1.2880004e+01   3.0143178e+00
   2.2498430e+01  -2.1782252e+01   1.5000000e+02  -8.1497767e-01  -1.3309924e+01   3.9667826e+00
   2.2359861e+01  -2.1784823e+01   1.5000000e+02  -1.0427084e+00  -1.3725290e+01   4.9797541e+00
   2.2221502e+01  -2.1792416e+01   1.5000000e+02  -1.2137267e+00  -1.4121847e+01   6.0651840e+00
   2.2083558e+01  -2.1805020e+01   1.5000000e+02  -1.3324689e+00  -1.4486875e+01   7.2382253e+00
   2.1946235e+01  -2.1822617e+01   1.5000000e+02  -1.4042600e+00  -1.4797322e+01   8.5128159e+00
   2.1809738e+01  -2.1845180e+01   1.5000000e+02  -1.4333263e+00  -1.5020508e+01   9.8963227e+00
   2.1674271e+01  -2.1872676e+01   1.5000000e+02  -1.4209376e+00  -1.5117643e+01   1.1384429e+01
   2.1540036e+01  -2.1905063e+01   1.5000000e+02  -1.3642369e+00  -1.5049757e+01   1.2957485e+01
   2.1407236e+01  -2.1942292e+01   1.5000000e+02  -1.2560542e+00  -1.4785147e+01   1.4579447e+01
   2.1276069e+01  -2.1984309e+01   1.5000000e+02  -1.0858924e+00  -1.4306795e+01   1.6200394e+01
   2.1146733e+01  -2.2031049e+01   1.5000000e+02  -8.4189386e-01  -1.3617737e+01   1.7762450e+01
   2.1019424e+01  -2.2082443e+01   1.5000000e+02  -5.1307478e-01  -1.2742507e+01   1.9208243e+01
   2.0894334e+01  -2.2138413e+01   1.5000000e+02  -9.1302642e-02  -1.1723816e+01   2.0489330e+01
   2.0771653e+01  -2.2198876e+01   1.5000000e+02   4.2772469e-01  -1.0615470e+01   2.1572104e+01
   2.0651568e+01  -2.2263739e+01   1.5000000e+02   1.0444867e+00  -9.4736990e+00   2.2439550e+01
   2.0534263e+01  -2.2332907e+01   1.5000000e+02   1.7565347e+00  -8.3495033e+00   2.3088831e+01
   2.0419919e+01  -2.2406273e+01   1.5000000e+02   2.5592527e+00  -7.2838288e+00   2.3525918e+01
   2.0308713e+01  -2.2483727e+01   1.5000000e+02   3.4461712e+00  -6.3062471e+00   2.3759520e+01
   2.0200816e+01  -2.2565153e+01   1.5000000e+02   4.4080924e+00  -5.4365584e+00   2.3796291e+01
   2.0096398e+01  -2.2650427e+01   1.5000000e+02   5.4313732e+00  -4.6880378e+00   2.3638847e+01
   1.9995623e+01  -2.2739418e+01   1.5000000e+02   6.4961392e+00  -4.0705734e+00   2.3286969e+01
   1.9898650e+01  -2.2831994e+01   1.5000000e+02   7.5754861e+00  -3.5926248e+00   2.2741202e+01
   1.9805634e+01  -2.2928011e+01   1.5000000e+02   8.6360963e+00  -3.2613546e+00   2.2007315e+01
   1.9716725e+01  -2.3027325e+01   1.5000000e+02   9.6409806e+00  -3.0813299e+00   2.1099842e+01
   1.9632067e+01  -2.3129783e+01   1.5000000e+02   1.0553177e+01  -3.0525267e+00   2.0043606e+01
   1.9551798e+01  -2.3235229e+01   1.5000000e+02   1.1340070e+01  -3.1687285e+00   1.8872837e+01
   1.9476052e+01  -2.3343501e+01   1.5000000e+02   1.1977241e+01  -3.4168884e+00   1.7628429e+01
   1.9404954e+01  -2.3454432e+01   1.5000000e+02   1.2451470e+01  -3.7776821e+00   1.6353891e+01
   1.9338627e+01  -2.3567853e+01   1.5000000e+02   1.2762617e+01  -4.2272385e+00   1.5090601e+01
   1.9277184e+01  -2.3683587e+01   1.5000000e+02   1.2923720e+01  -4.7395004e+00   1.3872856e+01
   1.9220732e+01  -2.3801457e+01   1.5000000e+02   1.2959157e+01  -5.2891204e+00   1.2723111e+01
   1.9169372e+01  -2.3921279e+01   1.5000000e+02   1.2900291e+01  -5.8540929e+00   1.1648630e+01
   1.9123198e+01  -2.4042867e+01   1.5000000e+02   1.2779134e+01  -6.4177778e+00   1.0640453e+01
   1.9082297e+01  -2.4166031e+01   1.5000000e+02   1.2621192e+01  -6.9696770e+00   9.6758198e+00
   1.9046746e+01  -2.4290580e+01   1.5000000e+02   1.2439473e+01  -7.5047506e+00   8.7240056e+00
   1.9016617e+01  -2.4416318e+01   1.5000000e+02   1.2231685e+01  -8.0214127e+00   7.7544438e+00
   1.8991974e+01  -2.4543048e+01   1.5000000e+02   1.1981643e+01  -8.5188266e+00   6.7448611e+00
   1.8972871e+01  -2.4670569e+01   1.5000000e+02   1.1664616e+01  -8.9943725e+00   5.6870600e+00
   1.8959356e+01  -2.4798682e+01   1.5000000e+02   1.1254757e+01  -9.4422555e+00   4.5884537e+00
   1.8951466e+01  -2.4927181e+01   1.5000000e+02   1.0731991e+01  -9.8534844e+00   3.4695853e+00
   1.8949233e+01  -2.5055864e+01   1.5000000e+02   1.0086148e+01  -1.0217364e+01   2.3586964e+00
   1.8952678e+01  -2.5184526e+01   1.5000000e+02   9.3175892e+00  -1.0523661e+01   1.2863497e+00
   1.8961812e+01  -2.5312959e+01   1.5000000e+02   8.4352819e+00  -1.0764982e+01   2.8176326e-01
   1.8976640e+01  -2.5440959e+01   1.5000000e+02   7.4542491e+00  -1.0938798e+01  -6.2848736e-01
   1.8997156e+01  -2.5568319e+01   1.5000000e+02   6.3943356e+00  -1.1048745e+01  -1.4202071e+00
   1.9023345e+01  -2.5694833e+01   1.5000000e+02   5.2806006e+00  -1.1105185e+01  -2.0721030e+00
   1.9055182e+01  -2.5820297e+01   1.5000000e+02   4.1442919e+00  -1.1124844e+01  -2.5683853e+00
   1.9092635e+01  -2.5944507e+01   1.5000000e+02   3.0225436e+00  -1.1129319e+01  -2.9035186e+00
   1.9135659e+01  -2.6067259e+01   1.5000000e+02   1.9553853e+00  -1.1142284e+01  -3.0873582e+00
   1.9184203e+01  -2.6188354e+01   1.5000000e+02   9.8002207e-01  -1.1185508e+01  -3.1483806e+00
   1.9238205e+01  -2.6307592e+01   1.5000000e+02   1.2398679e-01  -1.1274210e+01  -3.1327379e+00
   1.9297592e+01  -2.6424776e+01   1.5000000e+02  -6.0075169e-01  -1.1412792e+01  -3.0985691e+00
   1.9362282e+01  -2.6539714e+01   1.5000000e+02  -1.2004899e+00  -1.1592213e+01  -3.1066122e+00
   1.9432187e+01  -2.6652214e+01   1.5000000e+02  -1.6982577e+00  -1.1789988e+01  -3.2096359e+00
   1.9507204e+01  -2.6762089e+01   1.5000000e+02  -2.1286204e+00  -1.1973118e+01  -3.4433430e+00
   1.9587223e+01  -2.6869156e+01   1.5000000e+02  -2.5303858e+00  -1.2103599e+01  -3.8212271e+00
   1.9672127e+01  -2.6973236e+01   1.5000000e+02  -2.9392318e+00  -1.2145322e+01  -4.3340010e+00
   1.9761785e+01  -2.7074154e+01   1.5000000e+02  -3.3817784e+00  -1.2070905e+01  -4.9532927e+00
   1.9856060e+01  -2.7171739e+01   1.5000000e+02  -3.8719726e+00  -1.1866908e+01  -5.6388201e+00
   1.9954807e+01  -2.7265827e+01   1.5000000e+02  -4.4099973e+00  -1.1536021e+01  -6.3472685e+00
   2.0057868e+01  -2.7356258e+01   1.5000000e+02  -4.9834734e+00  -1.1095524e+01  -7.0411999e+00
   2.0165081e+01  -2.7442878e+01   1.5000000e+02  -5.5705604e+00  -1.0572053e+01  -7.6962750e+00
   2.0686306e+01  -2.7925669e+01   1.5000000e+02  -8.0430731e+00  -7.5721863e+00  -9.4314216e+00
   2.0814779e+01  -2.7986786e+01   1.5000000e+02  -8.3084673e+00  -6.8948593e+00  -1.0064727e+01
   2.0945959e+01  -2.8043369e+01   1.5000000e+02  -8.4922455e+00  -6.0983001e+00  -1.0701738e+01
   2.1079638e+01  -2.8095326e+01   1.5000000e+02  -8.5988089e+00  -5.1613449e+00  -1.1301072e+01
   2.1215606e+01  -2.8142574e+01   1.5000000e+02  -8.6300981e+00  -4.0814349e+00  -1.1814092e+01
   2.1353647e+01  -2.8185037e+01   1.5000000e+02  -8.5855387e+00  -2.8728937e+00  -1.2197193e+01
   2.1493540e+01  -2.8222644e+01   1.5000000e+02  -8.4649928e+00  -1.5589602e+00  -1.2420300e+01
   2.1635060e+01  -2.8255337e+01   1.5000000e+02  -8.2733678e+00  -1.6169006e-01  -1.2467692e+01
   2.1777982e+01  -2.8283060e+01   1.5000000e+02  -8.0246385e+00   1.3050577e+00  -1.2331239e+01
   2.1922073e+01  -2.8305770e+01   1.5000000e+02  -7.7435603e+00   2.8352689e+00  -1.1999888e+01
   2.2067101e+01  -2.8323429e+01   1.5000000e+02  -7.4639036e+00   4.4227491e+00  -1.1451636e+01
   2.2212832e+01  -2.8336008e+01   1.5000000e+02  -7.2234924e+00   6.0484187e+00  -1.0653471e+01
   2.2359029e+01  -2.8343488e+01   1.5000000e+02  -7.0571871e+00   7.6696256e+00  -9.5713531e+00
   2.2505454e+01  -2.8345856e+01   1.5000000e+02  -6.9899724e+00   9.2181706e+00  -8.1868376e+00
   2.2651871e+01  -2.8343107e+01   1.5000000e+02  -7.0325749e+00   1.0609802e+01  -6.5126421e+00
   2.2798041e+01  -2.8335247e+01   1.5000000e+02  -7.1810677e+00   1.1761778e+01  -4.5995994e+00
   2.2943728e+01  -2.8322288e+01   1.5000000e+02  -7.4201157e+00   1.2611226e+01  -2.5318777e+00
   2.3088695e+01  -2.8304252e+01   1.5000000e+02  -7.7278577e+00   1.3127514e+01  -4.1363773e-01
   2.3232707e+01  -2.8281167e+01   1.5000000e+02  -8.0802091e+00   1.3316329e+01   1.6476974e+00
   2.3375531e+01  -2.8253072e+01   1.5000000e+02  -8.4533864e+00   1.3216278e+01   3.5571849e+00
   2.3516939e+01  -2.8220012e+01   1.5000000e+02  -8.8250976e+00   1.2889881e+01   5.2446330e+00
   2.3656701e+01  -2.8182041e+01   1.5000000e+02  -9.1753890e+00   1.2411148e+01   6.6713446e+00
   2.3794595e+01  -2.8139219e+01   1.5000000e+02  -9.4879203e+00   1.1852496e+01   7.8303892e+00
   2.3930400e+01  -2.8091618e+01   1.5000000e+02  -9.7512881e+00   1.1274295e+01   8.7405697e+00
   2.4063901e+01  -2.8039313e+01   1.5000000e+02  -9.9598609e+00   1.0718995e+01   9.4367990e+00
   2.4194885e+01  -2.7982389e+01   1.5000000e+02  -1.0113473e+01   1.0210077e+01   9.9600121e+00
   2.4323149e+01  -2.7920938e+01   1.5000000e+02  -1.0216307e+01   9.7544674e+00   1.0348971e+01
   2.4448489e+01  -2.7855059e+01   1.5000000e+02  -1.0275423e+01   9.3469306e+00   1.0634846e+01
   2.4570713e+01  -2.7784858e+01   1.5000000e+02  -1.0299246e+01   8.9748333e+00   1.0838900e+01
   2.4689631e+01  -2.7710446e+01   1.5000000e+02  -1.0296317e+01   8.6226034e+00   1.0972386e+01
   2.4805061e+01  -2.7631944e+01   1.5000000e+02  -1.0274195e+01   8.2752568e+00   1.1038271e+01
   2.4916827e+01  -2.7549475e+01   1.5000000e+02  -1.0238809e+01   7.9212022e+00   1.1033784e+01
   2.5024761e+01  -2.7463172e+01   1.5000000e+02  -1.0194233e+01   7.5542050e+00   1.0953628e+01
   2.5128703e+01  -2.7373171e+01   1.5000000e+02  -1.0143197e+01   7.1744779e+00   1.0793101e+01
   2.5228498e+01  -2.7279614e+01   1.5000000e+02  -1.0088155e+01   6.7883618e+00   1.0550753e+01
   2.5324001e+01  -2.7182650e+01   1.5000000e+02  -1.0032583e+01   6.4062984e+00   1.0229730e+01
   2.5415073e+01  -2.7082429e+01   1.5000000e+02  -9.9819015e+00   6.0395859e+00   9.8371143e+00
   2.5501585e+01  -2.6979111e+01   1.5000000e+02  -9.9431733e+00   5.6967447e+00   9.3816169e+00
   2.5583414e+01  -2.6872856e+01   1.5000000e+02  -9.9233023e+00   5.3810547e+00   8.8703265e+00
   2.5660449e+01  -2.6763829e+01   1.5000000e+02  -9.9259143e+00   5.0899834e+00   8.3064889e+00
   2.5732583e+01  -2.6652200e+01   1.5000000e+02  -9.9482112e+00   4.8168898e+00   7.6895537e+00
   2.5799720e+01  -2.6538143e+01   1.5000000e+02  -9.9793219e+00   4.5540102e+00   7.0179354e+00
   2.5861772e+01  -2.6421832e+01   1.5000000e+02  -1.0001368e+01   4.2956336e+00   6.2933118e+00
   2.5918660e+01  -2.6303447e+01   1.5000000e+02  -9.9932034e+00   4.0402344e+00   5.5245541e+00
   2.5970313e+01  -2.6183169e+01   1.5000000e+02  -9.9356210e+00   3.7910716e+00   4.7292942e+00
   2.6016669e+01  -2.6061182e+01   1.5000000e+02  -9.8161560e+00   3.5553047e+00   3.9324439e+00
   2.6057675e+01  -2.5937671e+01   1.5000000e+02  -9.6318221e+00   3.3421850e+00   3.1620926e+00
   2.6093286e+01  -2.5812825e+01   1.5000000e+02  -9.3889618e+00   3.1610261e+00   2.4443676e+00
   2.6123465e+01  -2.5686832e+01   1.5000000e+02  -9.1005644e+00   3.0195746e+00   1.7991128e+00
   2.6148185e+01  -2.5559882e+01   1.5000000e+02  -8.7826404e+00   2.9231369e+00   1.2379460e+00
   2.6167426e+01  -2.5432165e+01   1.5000000e+02  -8.4517152e+00   2.8744394e+00   7.6473065e-01
   2.6181176e+01  -2.5303873e+01   1.5000000e+02  -8.1247648e+00   2.8738452e+00   3.7696149e-01
   2.6189434e+01  -2.5175198e+01   1.5000000e+02  -7.8209479e+00   2.9195155e+00   6.5852671e-02
   2.6192204e+01  -2.5046330e+01   1.5000000e+02  -7.5627092e+00   3.0073441e+00  -1.8591331e-01
   2.6189500e+01  -2.4917461e+01   1.5000000e+02  -7.3736099e+00   3.1306452e+00  -4.0762182e-01
   2.6181342e+01  -2.4788782e+01   1.5000000e+02  -7.2720229e+00   3.2798697e+00  -6.4216053e-01
   2.6167759e+01  -2.4660481e+01   1.5000000e+02  -7.2625484e+00   3.4423920e+00  -9.4296484e-01
   2.6148789e+01  -2.4532749e+01   1.5000000e+02  -7.3288192e+00   3.6024307e+00  -1.3653492e+00
   2.6124475e+01  -2.4405771e+01   1.5000000e+02  -7.4312670e+00   3.7412434e+00  -1.9541164e+00
   2.6094868e+01  -2.4279733e+01   1.5000000e+02  -7.5115817e+00   3.8378183e+00  -2.7311303e+00
   2.6060027e+01  -2.4154819e+01   1.5000000e+02  -7.5030858e+00   3.8704571e+00  -3.6869490e+00
   2.6020018e+01  -2.4031210e+01   1.5000000e+02  -7.3442701e+00   3.8192450e+00  -4.7791928e+00
   2.5974912e+01  -2.3909085e+01   1.5000000e+02  -6.9919968e+00   3.6689646e+00  -5.9382733e+00
   2.5924790e+01  -2.3788621e+01   1.5000000e+02  -6.4311775e+00   3.4116345e+00  -7.0792737e+00
   2.5869736e+01  -2.3669991e+01   1.5000000e+02  -5.6783811e+00   3.0478380e+00  -8.1174703e+00
   2.5809843e+01  -2.3553365e+01   1.5000000e+02  -4.7781552e+00   2.5862177e+00  -8.9836556e+00
   2.5745208e+01  -2.3438912e+01   1.5000000e+02  -3.7927650e+00   2.0412459e+00  -9.6352267e+00
   2.5675937e+01  -2.3326794e+01   1.5000000e+02  -2.7884685e+00   1.4299920e+00  -1.0059999e+01
   2.5602138e+01  -2.3217172e+01   1.5000000e+02  -1.8227339e+00   7.6909747e-01  -1.0272391e+01
   2.5523926e+01  -2.3110201e+01   1.5000000e+02  -9.3586311e-01   7.2769807e-02  -1.0304421e+01
   2.5441424e+01  -2.3006035e+01   1.5000000e+02  -1.4836950e-01  -6.4782251e-01  -1.0195097e+01
   2.5354757e+01  -2.2904819e+01   1.5000000e+02   5.3685395e-01  -1.3841077e+00  -9.9812531e+00
   2.5264056e+01  -2.2806699e+01   1.5000000e+02   1.1292588e+00  -2.1288902e+00  -9.6915132e+00
   2.5169457e+01  -2.2711812e+01   1.5000000e+02   1.6444613e+00  -2.8750303e+00  -9.3437286e+00
   2.5071102e+01  -2.2620292e+01   1.5000000e+02   2.0984994e+00  -3.6142098e+00  -8.9454991e+00
   2.4969133e+01  -2.2532269e+01   1.5000000e+02   2.5034906e+00  -4.3361411e+00  -8.4968714e+00
   2.4863703e+01  -2.2447865e+01   1.5000000e+02   2.8648790e+00  -5.0282552e+00  -7.9943554e+00
   2.4754962e+01  -2.2367199e+01   1.5000000e+02   3.1804462e+00  -5.6762070e+00  -7.4355017e+00
   2.4643070e+01  -2.2290385e+01   1.5000000e+02   3.4409198e+00  -6.2653477e+00  -6.8232065e+00
   2.4528186e+01  -2.2217530e+01   1.5000000e+02   3.6322462e+00  -6.7834780e+00  -6.1686442e+00
   2.4410476e+01  -2.2148736e+01   1.5000000e+02   3.7390558e+00  -7.2243456e+00  -5.4917835e+00
   2.4290106e+01  -2.2084099e+01   1.5000000e+02   3.7486465e+00  -7.5910175e+00  -4.8186834e+00
   2.4167247e+01  -2.2023709e+01   1.5000000e+02   3.6543988e+00  -7.8976193e+00  -4.1759265e+00
   2.4042073e+01  -2.1967650e+01   1.5000000e+02   3.4576705e+00  -8.1682762e+00  -3.5835896e+00
   2.3914760e+01  -2.1916000e+01   1.5000000e+02   3.1676139e+00  -8.4328331e+00  -3.0491311e+00
   2.3785486e+01  -2.1868832e+01   1.5000000e+02   2.7991358e+00  -8.7202743e+00  -2.5646203e+00
   2.3654432e+01  -2.1826210e+01   1.5000000e+02   2.3699245e+00  -9.0519620e+00  -2.1086292e+00
   2.3521781e+01  -2.1788195e+01   1.5000000e+02   1.8978028e+00  -9.4372387e+00  -1.6522236e+00
   2.3387718e+01  -2.1754838e+01   1.5000000e+02   1.3992543e+00  -9.8729360e+00  -1.1665921e+00
   2.3252428e+01  -2.1726186e+01   1.5000000e+02   8.8932213e-01  -1.0346694e+01  -6.2935165e-01
   2.3116098e+01  -2.1702278e+01   1.5000000e+02   3.8225689e-01  -1.0842207e+01  -2.7453260e-02
   2.2978918e+01  -2.1683149e+01   1.5000000e+02  -1.0791233e-01  -1.1344183e+01   6.4354995e-01
   2.2841078e+01  -2.1668824e+01   1.5000000e+02  -5.6756318e-01  -1.1841364e+01   1.3826490e+00
   2.2702767e+01  -2.1659323e+01   1.5000000e+02  -9.8438525e-01  -1.2327235e+01   2.1872616e+00
   2.2564176e+01  -2.1654660e+01   1.5000000e+02  -1.3486386e+00  -1.2798758e+01   3.0565696e+00
   2.2425496e+01  -2.1654840e+01   1.5000000e+02  -1.6542193e+00  -1.3253775e+01   3.9936938e+00
   2.2286920e+01  -2.1659864e+01   1.5000000e+02  -1.8990446e+00  -1.3687683e+01   5.0063079e+00
   2.2148637e+01  -2.1669725e+01   1.5000000e+02  -2.0847162e+00  -1.4090093e+01   6.1054374e+00
   2.2010839e+01  -2.1684408e+01   1.5000000e+02  -2.2154343e+00  -1.4442421e+01   7.3023751e+00
   2.1873716e+01  -2.1703895e+01   1.5000000e+02  -2.2964188e+00  -1.4717408e+01   8.6044803e+00
   2.1737458e+01  -2.1728157e+01   1.5000000e+02  -2.3322212e+00  -1.4880986e+01   1.0010621e+01
   2.1602252e+01  -2.1757160e+01   1.5000000e+02  -2.3251403e+00  -1.4896487e+01   1.1507549e+01
   2.1468288e+01  -2.1790866e+01   1.5000000e+02  -2.2741856e+00  -1.4730621e+01   1.3067937e+01
   2.1335749e+01  -2.1829227e+01   1.5000000e+02  -2.1749142e+00  -1.4360194e+01   1.4651135e+01
   2.1204822e+01  -2.1872189e+01   1.5000000e+02  -2.0200811e+00  -1.3778109e+01   1.6206862e+01
   2.1075688e+01  -2.1919694e+01   1.5000000e+02  -1.8010622e+00  -1.2996715e+01   1.7681824e+01
   2.0948528e+01  -2.1971674e+01   1.5000000e+02  -1.5096157e+00  -1.2047226e+01   1.9027331e+01
   2.0823520e+01  -2.2028059e+01   1.5000000e+02  -1.1392991e+00  -1.0975100e+01   2.0206083e+01
   2.0700841e+01  -2.2088768e+01   1.5000000e+02  -6.8629145e-01  -9.8328178e+00   2.1195856e+01
   2.0580663e+01  -2.2153718e+01   1.5000000e+02  -1.4921608e-01  -8.6721850e+00   2.1989537e+01
   2.0463158e+01  -2.2222818e+01   1.5000000e+02   4.7154191e-01  -7.5383152e+00   2.2591675e+01
   2.0348491e+01  -2.2295971e+01   1.5000000e+02   1.1746212e+00  -6.4662825e+00   2.3013132e+01
   2.0236828e+01  -2.2373076e+01   1.5000000e+02   1.9578846e+00  -5.4808850e+00   2.3265426e+01
   2.0128329e+01  -2.2454024e+01   1.5000000e+02   2.8175399e+00  -4.5985339e+00   2.3356431e+01
   2.0023151e+01  -2.2538701e+01   1.5000000e+02   3.7464041e+00  -3.8303297e+00   2.3288557e+01
   1.9921446e+01  -2.2626990e+01   1.5000000e+02   4.7318196e+00  -3.1849034e+00   2.3059699e+01
   1.9823365e+01  -2.2718765e+01   1.5000000e+02   5.7540417e+00  -2.6701298e+00   2.2666445e+01
   1.9729052e+01  -2.2813897e+01   1.5000000e+02   6.7861777e+00  -2.2932085e+00   2.2108330e+01
   1.9638647e+01  -2.2912253e+01   1.5000000e+02   7.7958224e+00  -2.0594616e+00   2.1391657e+01
   1.9552286e+01  -2.3013693e+01   1.5000000e+02   8.7481387e+00  -1.9704485e+00   2.0531717e+01
   1.9470099e+01  -2.3118074e+01   1.5000000e+02   9.6097403e+00  -2.0223062e+00   1.9552882e+01
   1.9392212e+01  -2.3225247e+01   1.5000000e+02   1.0352415e+01  -2.2049402e+00   1.8486914e+01
   1.9318746e+01  -2.3335061e+01   1.5000000e+02   1.0956293e+01  -2.5023330e+00   1.7369988e+01
   1.9249816e+01  -2.3447358e+01   1.5000000e+02   1.1412023e+01  -2.8938186e+00   1.6239103e+01
   1.9185531e+01  -2.3561979e+01   1.5000000e+02   1.1721961e+01  -3.3561691e+00   1.5128074e+01
   1.9125995e+01  -2.3678760e+01   1.5000000e+02   1.1899848e+01  -3.8660203e+00   1.4063536e+01
   1.9071306e+01  -2.3797532e+01   1.5000000e+02   1.1968710e+01  -4.4023255e+00   1.3061291e+01
   1.9021554e+01  -2.3918126e+01   1.5000000e+02   1.1956759e+01  -4.9484208e+00   1.2123802e+01
   1.8976826e+01  -2.4040367e+01   1.5000000e+02   1.1891708e+01  -5.4931838e+00   1.1239948e+01
   1.8937199e+01  -2.4164080e+01   1.5000000e+02   1.1794638e+01  -6.0309766e+00   1.0387536e+01
   1.8902746e+01  -2.4289084e+01   1.5000000e+02   1.1675183e+01  -6.5602627e+00   9.5386297e+00
   1.8873531e+01  -2.4415198e+01   1.5000000e+02   1.1529513e+01  -7.0812387e+00   8.6664154e+00
   1.8849613e+01  -2.4542239e+01   1.5000000e+02   1.1341984e+01  -7.5931922e+00   7.7518249e+00
   1.8831043e+01  -2.4670020e+01   1.5000000e+02   1.1089913e+01  -8.0924159e+00   6.7879727e+00
   1.8817863e+01  -2.4798355e+01   1.5000000e+02   1.0749920e+01  -8.5714340e+00   5.7810899e+00
   1.8810111e+01  -2.4927055e+01   1.5000000e+02   1.0303653e+01  -9.0196534e+00   4.7481215e+00
   1.8807813e+01  -2.5055931e+01   1.5000000e+02   9.7410485e+00  -9.4250366e+00   3.7123879e+00
   1.8810992e+01  -2.5184791e+01   1.5000000e+02   9.0606977e+00  -9.7762939e+00   2.6992349e+00
   1.8819658e+01  -2.5313444e+01   1.5000000e+02   8.2680485e+00  -1.0064827e+01   1.7335644e+00
   1.8833818e+01  -2.5441700e+01   1.5000000e+02   7.3734150e+00  -1.0286314e+01   8.3941951e-01
   1.8853467e+01  -2.5569366e+01   1.5000000e+02   6.3913419e+00  -1.0441672e+01   4.0888238e-02
   1.8878595e+01  -2.5696251e+01   1.5000000e+02   5.3416803e+00  -1.0537662e+01  -6.3800750e-01
   1.8909179e+01  -2.5822166e+01   1.5000000e+02   4.2513511e+00  -1.0586923e+01  -1.1755630e+00
   1.8945193e+01  -2.5946919e+01   1.5000000e+02   3.1549696e+00  -1.0607395e+01  -1.5572996e+00
   1.8986599e+01  -2.6070322e+01   1.5000000e+02   2.0927173e+00  -1.0620645e+01  -1.7817928e+00
   1.9033352e+01  -2.6192188e+01   1.5000000e+02   1.1053654e+00  -1.0649058e+01  -1.8654125e+00
   1.9085398e+01  -2.6312332e+01   1.5000000e+02   2.2743825e-01  -1.0711937e+01  -1.8436534e+00
   1.9142673e+01  -2.6430569e+01   1.5000000e+02  -5.1943939e-01  -1.0821207e+01  -1.7679741e+00
   1.9205107e+01  -2.6546718e+01   1.5000000e+02  -1.1309533e+00  -1.0977795e+01  -1.6984782e+00
   1.9272619e+01  -2.6660601e+01   1.5000000e+02  -1.6207878e+00  -1.1169809e+01  -1.6941302e+00
   1.9345121e+01  -2.6772041e+01   1.5000000e+02  -2.0175516e+00  -1.1373317e+01  -1.8031407e+00
   1.9422517e+01  -2.6880867e+01   1.5000000e+02  -2.3590412e+00  -1.1555758e+01  -2.0555900e+00
   1.9504699e+01  -2.6986910e+01   1.5000000e+02  -2.6854138e+00  -1.1681403e+01  -2.4596646e+00
   1.9591555e+01  -2.7090003e+01   1.5000000e+02  -3.0327743e+00  -1.1717853e+01  -3.0019199e+00
   1.9682962e+01  -2.7189986e+01   1.5000000e+02  -3.4280546e+00  -1.1642164e+01  -3.6510098e+00
   1.9778789e+01  -2.7286702e+01   1.5000000e+02  -3.8857015e+00  -1.1445351e+01  -4.3644898e+00
   1.9878898e+01  -2.7379999e+01   1.5000000e+02  -4.4064195e+00  -1.1134068e+01  -5.0974105e+00
   1.9983142e+01  -2.7469729e+01   1.5000000e+02  -4.9779456e+00  -1.0728804e+01  -5.8112137e+00
   2.0091368e+01  -2.7555751e+01   1.5000000e+02  -5.5776888e+00  -1.0258626e+01  -6.4812374e+00
   2.0203413e+01  -2.7637929e+01   1.5000000e+02  -6.1767958e+00  -9.7533434e+00  -7.1009962e+00
   2.0319108e+01  -2.7716131e+01   1.5000000e+02  -6.7451540e+00  -9.2347440e+00  -7.6819415e+00
   2.0438279e+01  -2.7790233e+01   1.5000000e+02  -7.2564546e+00  -8.7092570e+00  -8.2479436e+00
   2.0560741e+01  -2.7860116e+01   1.5000000e+02  -7.6921284e+00  -8.1646216e+00  -8.8253602e+00
   2.1165322e+01  -2.8262981e+01   1.5000000e+02  -9.1284932e+00  -4.6578325e+00  -1.1052955e+01
   2.1302850e+01  -2.8305387e+01   1.5000000e+02  -9.1224296e+00  -3.5651503e+00  -1.1562856e+01
   2.1442164e+01  -2.8343157e+01   1.5000000e+02  -9.0241422e+00  -2.3515814e+00  -1.1933063e+01
   2.1583055e+01  -2.8376234e+01   1.5000000e+02  -8.8338604e+00  -1.0356588e+00  -1.2146680e+01
   2.1725317e+01  -2.8404569e+01   1.5000000e+02  -8.5619506e+00   3.7303828e-01  -1.2193398e+01
   2.1868736e+01  -2.8428119e+01   1.5000000e+02  -8.2306861e+00   1.8739884e+00  -1.2058107e+01
   2.2013100e+01  -2.8446848e+01   1.5000000e+02  -7.8727474e+00   3.4676361e+00  -1.1711644e+01
   2.2158193e+01  -2.8460729e+01   1.5000000e+02  -7.5267656e+00   5.1414221e+00  -1.1109590e+01
   2.2303797e+01  -2.8469741e+01   1.5000000e+02  -7.2308168e+00   6.8565090e+00  -1.0202179e+01
   2.2449696e+01  -2.8473871e+01   1.5000000e+02  -7.0155961e+00   8.5427189e+00  -8.9529405e+00
   2.2595669e+01  -2.8473111e+01   1.5000000e+02  -6.8993254e+00   1.0106202e+01  -7.3583575e+00
   2.2741500e+01  -2.8467463e+01   1.5000000e+02  -6.8860010e+00   1.1448216e+01  -5.4589046e+00
   2.2886969e+01  -2.8456936e+01   1.5000000e+02  -6.9673351e+00   1.2486771e+01  -3.3365990e+00
   2.3031858e+01  -2.8441545e+01   1.5000000e+02  -7.1271162e+00   1.3172888e+01  -1.1008844e+00
   2.3175951e+01  -2.8421314e+01   1.5000000e+02  -7.3458478e+00   1.3497041e+01   1.1302253e+00
   2.3319033e+01  -2.8396273e+01   1.5000000e+02  -7.6039035e+00   1.3486766e+01   3.2476721e+00
   2.3460892e+01  -2.8366459e+01   1.5000000e+02  -7.8827149e+00   1.3198406e+01   5.1646640e+00
   2.3601315e+01  -2.8331918e+01   1.5000000e+02  -8.1648224e+00   1.2705563e+01   6.8247359e+00
   2.3740095e+01  -2.8292700e+01   1.5000000e+02  -8.4341121e+00   1.2086345e+01   8.2042780e+00
   2.3877028e+01  -2.8248866e+01   1.5000000e+02  -8.6767406e+00   1.1411807e+01   9.3092905e+00
   2.4011913e+01  -2.8200479e+01   1.5000000e+02  -8.8826083e+00   1.0737735e+01   1.0167636e+01
   2.4144550e+01  -2.8147613e+01   1.5000000e+02  -9.0463648e+00   1.0100917e+01   1.0819222e+01
   2.4274749e+01  -2.8090347e+01   1.5000000e+02  -9.1676263e+00   9.5195747e+00   1.1306547e+01
   2.4402319e+01  -2.8028764e+01   1.5000000e+02  -9.2503493e+00   8.9969010e+00   1.1667339e+01
   2.4527078e+01  -2.7962957e+01   1.5000000e+02  -9.3016296e+00   8.5258322e+00   1.1930377e+01
   2.4648847e+01  -2.7893024e+01   1.5000000e+02  -9.3304236e+00   8.0939094e+00   1.2113928e+01
   2.4767452e+01  -2.7819066e+01   1.5000000e+02  -9.3461315e+00   7.6872160e+00   1.2226329e+01
   2.4882727e+01  -2.7741195e+01   1.5000000e+02  -9.3570332e+00   7.2932121e+00   1.2267917e+01
   2.4994510e+01  -2.7659523e+01   1.5000000e+02  -9.3689713e+00   6.9029048e+00   1.2233628e+01
   2.5102647e+01  -2.7574171e+01   1.5000000e+02  -9.3843929e+00   6.5123169e+00   1.2116397e+01
   2.5206988e+01  -2.7485263e+01   1.5000000e+02  -9.4025304e+00   6.1233481e+00   1.1910748e+01
   2.5307391e+01  -2.7392930e+01   1.5000000e+02  -9.4207645e+00   5.7433434e+00   1.1616096e+01
   2.5403722e+01  -2.7297305e+01   1.5000000e+02  -9.4370179e+00   5.3832013e+00   1.1238478e+01
   2.5495852e+01  -2.7198528e+01   1.5000000e+02  -9.4521767e+00   5.0541811e+00   1.0789938e+01
   2.5583660e+01  -2.7096740e+01   1.5000000e+02  -9.4713849e+00   4.7643300e+00   1.0285327e+01
   2.5667033e+01  -2.6992090e+01   1.5000000e+02  -9.5031749e+00   4.5157531e+00   9.7376400e+00
   2.5745863e+01  -2.6884727e+01   1.5000000e+02  -9.5563182e+00   4.3038575e+00   9.1536554e+00
   2.5820052e+01  -2.6774804e+01   1.5000000e+02  -9.6352200e+00   4.1187378e+00   8.5321568e+00
   2.5889508e+01  -2.6662480e+01   1.5000000e+02  -9.7358104e+00   3.9482830e+00   7.8658306e+00
   2.5954147e+01  -2.6547913e+01   1.5000000e+02  -9.8438883e+00   3.7816853e+00   7.1463326e+00
   2.6013892e+01  -2.6431267e+01   1.5000000e+02  -9.9369629e+00   3.6121059e+00   6.3706077e+00
   2.6068675e+01  -2.6312706e+01   1.5000000e+02  -9.9891878e+00   3.4377700e+00   5.5457100e+00
   2.6118434e+01  -2.6192397e+01   1.5000000e+02  -9.9776577e+00   3.2614576e+00   4.6903614e+00
   2.6163116e+01  -2.6070510e+01   1.5000000e+02  -9.8879313e+00   3.0888679e+00   3.8326650e+00
   2.6202673e+01  -2.5947215e+01   1.5000000e+02  -9.7170064e+00   2.9266506e+00   3.0048790e+00
   2.6237069e+01  -2.5822683e+01   1.5000000e+02  -9.4729542e+00   2.7807821e+00   2.2371829e+00
   2.6266271e+01  -2.5697088e+01   1.5000000e+02  -9.1717044e+00   2.6558356e+00   1.5526592e+00
   2.6290256e+01  -2.5570605e+01   1.5000000e+02  -8.8327271e+00   2.5551337e+00   9.6504179e-01
   2.6309007e+01  -2.5443407e+01   1.5000000e+02  -8.4759010e+00   2.4814913e+00   4.7937576e-01
   2.6322517e+01  -2.5315670e+01   1.5000000e+02  -8.1210912e+00   2.4379001e+00   9.3869138e-02
   2.6330782e+01  -2.5187569e+01   1.5000000e+02  -7.7898341e+00   2.4276617e+00  -1.9954431e-01
   2.6333808e+01  -2.5059280e+01   1.5000000e+02  -7.5066824e+00   2.4537619e+00  -4.1724385e-01
   2.6331608e+01  -2.4930976e+01   1.5000000e+02  -7.2973979e+00   2.5177744e+00  -5.8745580e-01
   2.6324201e+01  -2.4802834e+01   1.5000000e+02  -7.1830547e+00   2.6186611e+00  -7.5229642e-01
   2.6311613e+01  -2.4675025e+01   1.5000000e+02  -7.1717109e+00   2.7517169e+00  -9.6543158e-01
   2.6293876e+01  -2.4547724e+01   1.5000000e+02  -7.2511818e+00   2.9077045e+00  -1.2843133e+00
   2.6271031e+01  -2.4421101e+01   1.5000000e+02  -7.3862334e+00   3.0722623e+00  -1.7586399e+00
   2.6243123e+01  -2.4295326e+01   1.5000000e+02  -7.5218961e+00   3.2259638e+00  -2.4182962e+00
   2.6210204e+01  -2.4170568e+01   1.5000000e+02  -7.5923717e+00   3.3454643e+00  -3.2644104e+00
   2.6172332e+01  -2.4046993e+01   1.5000000e+02  -7.5333405e+00   3.4060284e+00  -4.2661018e+00
   2.6129572e+01  -2.3924766e+01   1.5000000e+02  -7.2947386e+00   3.3851011e+00  -5.3638432e+00
   2.6081993e+01  -2.3804049e+01   1.5000000e+02  -6.8511606e+00   3.2660633e+00  -6.4789434e+00
   2.6029673e+01  -2.3685003e+01   1.5000000e+02  -6.2074783e+00   3.0410044e+00  -7.5272892e+00
   2.5972691e+01  -2.3567783e+01   1.5000000e+02  -5.3978992e+00   2.7115619e+00  -8.4345482e+00
   2.5911136e+01  -2.3452546e+01   1.5000000e+02  -4.4783659e+00   2.2875080e+00  -9.1487757e+00
   2.5845100e+01  -2.3339442e+01   1.5000000e+02  -3.5140760e+00   1.7836041e+00  -9.6471715e+00
   2.5774679e+01  -2.3228620e+01   1.5000000e+02  -2.5661847e+00   1.2160269e+00  -9.9351649e+00
   2.5699977e+01  -2.3120225e+01   1.5000000e+02  -1.6814990e+00   5.9956446e-01  -1.0039289e+01
   2.5621100e+01  -2.3014399e+01   1.5000000e+02  -8.8744288e-01  -5.3750430e-02  -9.9970105e+00
   2.5538160e+01  -2.2911279e+01   1.5000000e+02  -1.9236086e-01  -7.3462594e-01  -9.8468242e+00
   2.5451275e+01  -2.2810999e+01   1.5000000e+02   4.1032655e-01  -1.4356034e+00  -9.6208478e+00
   2.5360563e+01  -2.2713691e+01   1.5000000e+02   9.3612667e-01  -2.1498425e+00  -9.3407694e+00
   2.5266151e+01  -2.2619479e+01   1.5000000e+02   1.4033080e+00  -2.8699297e+00  -9.0169604e+00
   2.5168167e+01  -2.2528487e+01   1.5000000e+02   1.8278507e+00  -3.5869114e+00  -8.6501683e+00
   2.5066744e+01  -2.2440831e+01   1.5000000e+02   2.2200128e+00  -4.2896281e+00  -8.2348058e+00
   2.4962018e+01  -2.2356625e+01   1.5000000e+02   2.5825802e+00  -4.9643697e+00  -7.7631897e+00
   2.4854130e+01  -2.2275976e+01   1.5000000e+02   2.9106174e+00  -5.5951552e+00  -7.2300424e+00
   2.4743223e+01  -2.2198990e+01   1.5000000e+02   3.1925838e+00  -6.1649979e+00  -6.6367051e+00
   2.4629442e+01  -2.2125764e+01   1.5000000e+02   3.4126665e+00  -6.6585141e+00  -5.9940784e+00
   2.4512939e+01  -2.2056393e+01   1.5000000e+02   3.5540432e+00  -7.0656014e+00  -5.3233635e+00
   2.4393864e+01  -2.1990966e+01   1.5000000e+02   3.6025126e+00  -7.3854193e+00  -4.6536534e+00
   2.4272374e+01  -2.1929566e+01   1.5000000e+02   3.5495901e+00  -7.6291187e+00  -4.0165611e+00
   2.4148626e+01  -2.1872271e+01   1.5000000e+02   3.3942966e+00  -7.8199924e+00  -3.4389351e+00
   2.4022779e+01  -2.1819156e+01   1.5000000e+02   3.1431114e+00  -7.9902134e+00  -2.9358436e+00
   2.3894996e+01  -2.1770288e+01   1.5000000e+02   2.8082121e+00  -8.1745974e+00  -2.5062052e+00
   2.3765441e+01  -2.1725729e+01   1.5000000e+02   2.4047641e+00  -8.4031642e+00  -2.1328728e+00
   2.3634279e+01  -2.1685536e+01   1.5000000e+02   1.9483374e+00  -8.6949966e+00  -1.7872578e+00
   2.3501680e+01  -2.1649760e+01   1.5000000e+02   1.4533818e+00  -9.0555297e+00  -1.4367607e+00
   2.3367810e+01  -2.1618447e+01   1.5000000e+02   9.3302811e-01  -9.4780253e+00  -1.0521188e+00
   2.3232841e+01  -2.1591636e+01   1.5000000e+02   3.9991055e-01  -9.9479936e+00  -6.1215967e-01
   2.3096944e+01  -2.1569362e+01   1.5000000e+02  -1.3288463e-01  -1.0448510e+01  -1.0484359e-01
   2.2960291e+01  -2.1551654e+01   1.5000000e+02  -6.5145069e-01  -1.0964278e+01   4.7465645e-01
   2.2823057e+01  -2.1538532e+01   1.5000000e+02  -1.1416096e+00  -1.1483559e+01   1.1271996e+00
   2.2685413e+01  -2.1530015e+01   1.5000000e+02  -1.5901528e+00  -1.1998244e+01   1.8528916e+00
   2.2547535e+01  -2.1526113e+01   1.5000000e+02  -1.9862702e+00  -1.2502474e+01   2.6533707e+00
   2.2409597e+01  -2.1526832e+01   1.5000000e+02  -2.3226552e+00  -1.2990528e+01   3.5331695e+00
   2.2271773e+01  -2.1532169e+01   1.5000000e+02  -2.5959849e+00  -1.3454160e+01   4.4997807e+00
   2.2134238e+01  -2.1542118e+01   1.5000000e+02  -2.8066485e+00  -1.3879994e+01   5.5623252e+00
   2.1997165e+01  -2.1556667e+01   1.5000000e+02  -2.9579145e+00  -1.4247752e+01   6.7287989e+00
   2.1860729e+01  -2.1575798e+01   1.5000000e+02  -3.0546792e+00  -1.4530101e+01   8.0023986e+00
   2.1725102e+01  -2.1599485e+01   1.5000000e+02  -3.1021000e+00  -1.4694547e+01   9.3778975e+00
   2.1590456e+01  -2.1627699e+01   1.5000000e+02  -3.1042741e+00  -1.4707248e+01   1.0838881e+01
   2.1456963e+01  -2.1660403e+01   1.5000000e+02  -3.0632749e+00  -1.4538286e+01   1.2356583e+01
   2.1324792e+01  -2.1697557e+01   1.5000000e+02  -2.9786088e+00  -1.4167534e+01   1.3891081e+01
   2.1194112e+01  -2.1739113e+01   1.5000000e+02  -2.8473159e+00  -1.3589763e+01   1.5394956e+01
   2.1065091e+01  -2.1785018e+01   1.5000000e+02  -2.6646309e+00  -1.2817420e+01   1.6819224e+01
   2.0937892e+01  -2.1835213e+01   1.5000000e+02  -2.4250875e+00  -1.1879886e+01   1.8120111e+01
   2.0812680e+01  -2.1889635e+01   1.5000000e+02  -2.1236774e+00  -1.0819346e+01   1.9264737e+01
   2.0689616e+01  -2.1948213e+01   1.5000000e+02  -1.7567253e+00  -9.6843424e+00   2.0234282e+01
   2.0568860e+01  -2.2010874e+01   1.5000000e+02  -1.3220911e+00  -8.5230792e+00   2.1023999e+01
   2.0450568e+01  -2.2077536e+01   1.5000000e+02  -8.1882772e-01  -7.3780124e+00   2.1640382e+01
   2.0334895e+01  -2.2148115e+01   1.5000000e+02  -2.4641490e-01  -6.2828053e+00   2.2096687e+01
   2.0221992e+01  -2.2222520e+01   1.5000000e+02   3.9574499e-01  -5.2616894e+00   2.2407884e+01
   2.0112007e+01  -2.2300655e+01   1.5000000e+02   1.1081947e+00  -4.3308504e+00   2.2586324e+01
   2.0005087e+01  -2.2382421e+01   1.5000000e+02   1.8903586e+00  -3.5009495e+00   2.2639026e+01
   1.9901373e+01  -2.2467711e+01   1.5000000e+02   2.7386160e+00  -2.7797373e+00   2.2567002e+01
   1.9801004e+01  -2.2556416e+01   1.5000000e+02   3.6442505e+00  -2.1740825e+00   2.2366786e+01
   1.9704116e+01  -2.2648422e+01   1.5000000e+02   4.5918828e+00  -1.6907858e+00   2.2033505e+01
   1.9610841e+01  -2.2743609e+01   1.5000000e+02   5.5592123e+00  -1.3361313e+00   2.1564602e+01
   1.9521305e+01  -2.2841855e+01   1.5000000e+02   6.5184076e+00  -1.1145042e+00   2.0963090e+01
   1.9435633e+01  -2.2943031e+01   1.5000000e+02   7.4387189e+00  -1.0266992e+00   2.0239459e+01
   1.9353944e+01  -2.3047007e+01   1.5000000e+02   8.2898357e+00  -1.0685414e+00   1.9411827e+01
   1.9276353e+01  -2.3153647e+01   1.5000000e+02   9.0450633e+00  -1.2303253e+00   1.8504689e+01
   1.9202970e+01  -2.3262812e+01   1.5000000e+02   9.6840683e+00  -1.4972263e+00   1.7546680e+01
   1.9133901e+01  -2.3374359e+01   1.5000000e+02   1.0194882e+01  -1.8505586e+00   1.6567873e+01
   1.9069247e+01  -2.3488141e+01   1.5000000e+02   1.0575115e+01  -2.2696277e+00   1.5596820e+01
   1.9009104e+01  -2.3604011e+01   1.5000000e+02   1.0832226e+01  -2.7339086e+00   1.4657456e+01
   1.8953562e+01  -2.3721815e+01   1.5000000e+02   1.0982427e+01  -3.2251171e+00   1.3766176e+01
   1.8902707e+01  -2.3841398e+01   1.5000000e+02   1.1048114e+01  -3.7290028e+00   1.2929400e+01
   1.8856619e+01  -2.3962601e+01   1.5000000e+02   1.1053715e+01  -4.2363289e+00   1.2142508e+01
   1.8815371e+01  -2.4085264e+01   1.5000000e+02   1.1020703e+01  -4.7428512e+00   1.1390735e+01
   1.8779032e+01  -2.4209225e+01   1.5000000e+02   1.0962949e+01  -5.2481441e+00   1.0652306e+01
   1.8747664e+01  -2.4334317e+01   1.5000000e+02   1.0883696e+01  -5.7534500e+00   9.9033182e+00
   1.8721324e+01  -2.4460373e+01   1.5000000e+02   1.0775197e+01  -6.2592589e+00   9.1231140e+00
   1.8700062e+01  -2.4587226e+01   1.5000000e+02   1.0621121e+01  -6.7632485e+00   8.2987978e+00
   1.8683922e+01  -2.4714703e+01   1.5000000e+02   1.0401023e+01  -7.2592901e+00   7.4276660e+00
   1.8672941e+01  -2.4842634e+01   1.5000000e+02   1.0095387e+01  -7.7378386e+00   6.5168936e+00
   1.8667150e+01  -2.4970845e+01   1.5000000e+02   9.6896357e+00  -8.1873168e+00   5.5811345e+00
   1.8666572e+01  -2.5099163e+01   1.5000000e+02   9.1759435e+00  -8.5960016e+00   4.6391337e+00
   1.8671226e+01  -2.5227412e+01   1.5000000e+02   8.5528619e+00  -8.9537840e+00   3.7110126e+00
   1.8681121e+01  -2.5355419e+01   1.5000000e+02   7.8236960e+00  -9.2534209e+00   2.8172866e+00
   1.8696260e+01  -2.5483007e+01   1.5000000e+02   6.9953858e+00  -9.4913421e+00   1.9795368e+00
   1.8716639e+01  -2.5610002e+01   1.5000000e+02   6.0788534e+00  -9.6681454e+00   1.2214093e+00
   1.8742248e+01  -2.5736228e+01   1.5000000e+02   5.0909045e+00  -9.7889458e+00   5.6832167e-01
   1.8773067e+01  -2.5861510e+01   1.5000000e+02   4.0562859e+00  -9.8635646e+00   4.4700180e-02
   1.8809070e+01  -2.5985676e+01   1.5000000e+02   3.0082392e+00  -9.9064049e+00  -3.3112989e-01
   1.8850225e+01  -2.6108553e+01   1.5000000e+02   1.9864281e+00  -9.9355977e+00  -5.5287601e-01
   1.8896490e+01  -2.6229968e+01   1.5000000e+02   1.0321072e+00  -9.9710997e+00  -6.3106300e-01
   1.8947817e+01  -2.6349751e+01   1.5000000e+02   1.8158567e-01  -1.0031737e+01  -5.9492527e-01
   1.9004149e+01  -2.6467735e+01   1.5000000e+02  -5.4021417e-01  -1.0131497e+01  -4.9029086e-01
   1.9065423e+01  -2.6583752e+01   1.5000000e+02  -1.1243312e+00  -1.0275966e+01  -3.7374906e-01
   1.9131567e+01  -2.6697639e+01   1.5000000e+02  -1.5792936e+00  -1.0459857e+01  -3.0421887e-01
   1.9202504e+01  -2.6809234e+01   1.5000000e+02  -1.9292826e+00  -1.0666579e+01  -3.3405678e-01
   1.9278145e+01  -2.6918377e+01   1.5000000e+02  -2.2097300e+00  -1.0870063e+01  -5.0135929e-01
   1.9358398e+01  -2.7024914e+01   1.5000000e+02  -2.4615628e+00  -1.1038719e+01  -8.2493783e-01
   1.9443161e+01  -2.7128690e+01   1.5000000e+02  -2.7251674e+00  -1.1140708e+01  -1.3023259e+00
   1.9532325e+01  -2.7229558e+01   1.5000000e+02  -3.0349404e+00  -1.1149680e+01  -1.9110641e+00
   1.9625774e+01  -2.7327370e+01   1.5000000e+02  -3.4149252e+00  -1.1049905e+01  -2.6131588e+00
   1.9723385e+01  -2.7421987e+01   1.5000000e+02  -3.8760094e+00  -1.0839609e+01  -3.3621014e+00
   1.9825027e+01  -2.7513269e+01   1.5000000e+02  -4.4149603e+00  -1.0531700e+01  -4.1115654e+00
   1.9930563e+01  -2.7601086e+01   1.5000000e+02  -5.0154716e+00  -1.0151244e+01  -4.8242570e+00
   2.0039849e+01  -2.7685307e+01   1.5000000e+02  -5.6510776e+00  -9.7298864e+00  -5.4792621e+00
   2.0152735e+01  -2.7765810e+01   1.5000000e+02  -6.2897203e+00  -9.2978583e+00  -6.0760006e+00
   2.0269062e+01  -2.7842477e+01   1.5000000e+02  -6.8992617e+00  -8.8753172e+00  -6.6332651e+00
   2.0388669e+01  -2.7915196e+01   1.5000000e+02  -7.4529038e+00  -8.4652881e+00  -7.1827077e+00
   2.0511386e+01  -2.7983857e+01   1.5000000e+02  -7.9329164e+00  -8.0507983e+00  -7.7576568e+00
   2.0637038e+01  -2.8048361e+01   1.5000000e+02  -8.3315436e+00  -7.5978093e+00  -8.3804082e+00
   2.0765445e+01  -2.8108612e+01   1.5000000e+02  -8.6486188e+00  -7.0638293e+00  -9.0523694e+00
   2.0896422e+01  -2.8164520e+01   1.5000000e+02  -8.8870078e+00  -6.4095897e+00  -9.7508614e+00
   2.1029779e+01  -2.8216002e+01   1.5000000e+02  -9.0479441e+00  -5.6096605e+00  -1.0434179e+01
   2.1696587e+01  -2.8530550e+01   1.5000000e+02  -9.2094129e+00  -3.6964369e-01  -1.1811033e+01
   2.1840388e+01  -2.8554221e+01   1.5000000e+02  -8.8398174e+00   1.0948637e+00  -1.1848402e+01
   2.1985113e+01  -2.8573223e+01   1.5000000e+02  -8.4193866e+00   2.6878558e+00  -1.1682073e+01
   2.2130560e+01  -2.8587531e+01   1.5000000e+02  -7.9860711e+00   4.4012430e+00  -1.1253639e+01
   2.2276525e+01  -2.8597124e+01   1.5000000e+02  -7.5785594e+00   6.1964053e+00  -1.0496794e+01
   2.2422804e+01  -2.8601989e+01   1.5000000e+02  -7.2302854e+00   7.9974716e+00  -9.3588076e+00
   2.2569191e+01  -2.8602118e+01   1.5000000e+02  -6.9646292e+00   9.6989234e+00  -7.8238933e+00
   2.2715481e+01  -2.8597512e+01   1.5000000e+02  -6.7926052e+00   1.1186346e+01  -5.9274555e+00
   2.2861468e+01  -2.8588178e+01   1.5000000e+02  -6.7135432e+00   1.2361747e+01  -3.7544497e+00
   2.3006949e+01  -2.8574127e+01   1.5000000e+02  -6.7181873e+00   1.3163144e+01  -1.4233884e+00
   2.3151719e+01  -2.8555381e+01   1.5000000e+02  -6.7926798e+00   1.3572527e+01   9.3580786e-01
   2.3295575e+01  -2.8531965e+01   1.5000000e+02  -6.9217709e+00   1.3613099e+01   3.2022367e+00
   2.3438319e+01  -2.8503913e+01   1.5000000e+02  -7.0902673e+00   1.3339809e+01   5.2784411e+00
   2.3579750e+01  -2.8471263e+01   1.5000000e+02  -7.2830767e+00   1.2827108e+01   7.0981849e+00
   2.3719672e+01  -2.8434062e+01   1.5000000e+02  -7.4849446e+00   1.2156282e+01   8.6288243e+00
   2.3857891e+01  -2.8392362e+01   1.5000000e+02  -7.6810142e+00   1.1404035e+01   9.8685918e+00
   2.3994218e+01  -2.8346222e+01   1.5000000e+02  -7.8582854e+00   1.0633779e+01   1.0840024e+01
   2.4128466e+01  -2.8295705e+01   1.5000000e+02  -8.0073715e+00   9.8907302e+00   1.1580872e+01
   2.4260450e+01  -2.8240882e+01   1.5000000e+02  -8.1236402e+00   9.2010648e+00   1.2134634e+01
   2.4389991e+01  -2.8181830e+01   1.5000000e+02  -8.2074298e+00   8.5744658e+00   1.2542538e+01
   2.4516915e+01  -2.8118631e+01   1.5000000e+02  -8.2634574e+00   8.0087590e+00   1.2838220e+01
   2.4641050e+01  -2.8051372e+01   1.5000000e+02  -8.2997811e+00   7.4949769e+00   1.3045360e+01
   2.4762232e+01  -2.7980147e+01   1.5000000e+02  -8.3264815e+00   7.0215041e+00   1.3177665e+01
   2.4880300e+01  -2.7905054e+01   1.5000000e+02  -8.3541389e+00   6.5769919e+00   1.3240016e+01
   2.4995099e+01  -2.7826197e+01   1.5000000e+02  -8.3919150e+00   6.1521800e+00   1.3230305e+01
   2.5106478e+01  -2.7743684e+01   1.5000000e+02  -8.4455647e+00   5.7412955e+00   1.3141798e+01
   2.5214294e+01  -2.7657628e+01   1.5000000e+02  -8.5159323e+00   5.3431637e+00   1.2966376e+01
   2.5318409e+01  -2.7568147e+01   1.5000000e+02  -8.5988465e+00   4.9618162e+00   1.2698467e+01
   2.5418691e+01  -2.7475363e+01   1.5000000e+02  -8.6868829e+00   4.6059047e+00   1.2338805e+01
   2.5515015e+01  -2.7379402e+01   1.5000000e+02  -8.7727089e+00   4.2865786e+00   1.1896524e+01
   2.5607260e+01  -2.7280395e+01   1.5000000e+02  -8.8528574e+00   4.0141819e+00   1.1388335e+01
   2.5695315e+01  -2.7178474e+01   1.5000000e+02  -8.9302711e+00   3.7946963e+00   1.0834481e+01
   2.5779072e+01  -2.7073779e+01   1.5000000e+02  -9.0142082e+00   3.6272971e+00   1.0252686e+01
   2.5858433e+01  -2.6966448e+01   1.5000000e+02  -9.1170015e+00   3.5039249e+00   9.6522388e+00
   2.5933304e+01  -2.6856627e+01   1.5000000e+02  -9.2484486e+00   3.4111524e+00   9.0309853e+00
   2.6003599e+01  -2.6744461e+01   1.5000000e+02  -9.4099651e+00   3.3336337e+00   8.3767391e+00
   2.6069240e+01  -2.6630099e+01   1.5000000e+02  -9.5909673e+00   3.2578147e+00   7.6730745e+00
   2.6130153e+01  -2.6513695e+01   1.5000000e+02  -9.7692609e+00   3.1746406e+00   6.9072685e+00
   2.6186274e+01  -2.6395400e+01   1.5000000e+02  -9.9155084e+00   3.0804753e+00   6.0772878e+00
   2.6237544e+01  -2.6275372e+01   1.5000000e+02  -1.0000196e+01   2.9763120e+00   5.1954508e+00
   2.6283911e+01  -2.6153767e+01   1.5000000e+02  -1.0000760e+01   2.8658552e+00   4.2874363e+00
   2.6325330e+01  -2.6030745e+01   1.5000000e+02  -9.9065559e+00   2.7533488e+00   3.3874157e+00
   2.6361764e+01  -2.5906467e+01   1.5000000e+02  -9.7202753e+00   2.6419764e+00   2.5309602e+00
   2.6393181e+01  -2.5781093e+01   1.5000000e+02  -9.4556257e+00   2.5333728e+00   1.7482836e+00
   2.6419557e+01  -2.5654786e+01   1.5000000e+02  -9.1326143e+00   2.4283190e+00   1.0601349e+00
   2.6440874e+01  -2.5527710e+01   1.5000000e+02  -8.7728261e+00   2.3282044e+00   4.7731841e-01
   2.6457122e+01  -2.5400027e+01   1.5000000e+02  -8.3971062e+00   2.2364821e+00   2.8845483e-03
   2.6468295e+01  -2.5271901e+01   1.5000000e+02  -8.0264704e+00   2.1593700e+00  -3.6561314e-01
   2.6474395e+01  -2.5143497e+01   1.5000000e+02  -7.6845680e+00   2.1053869e+00  -6.3644639e-01
   2.6475432e+01  -2.5014978e+01   1.5000000e+02  -7.3985003e+00   2.0838796e+00  -8.2703012e-01
   2.6471419e+01  -2.4886507e+01   1.5000000e+02  -7.1955442e+00   2.1030757e+00  -9.6794744e-01
   2.6462377e+01  -2.4758246e+01   1.5000000e+02  -7.0958935e+00   2.1681418e+00  -1.1042134e+00
   2.6448333e+01  -2.4630359e+01   1.5000000e+02  -7.1041966e+00   2.2794949e+00  -1.2913080e+00
   2.6429320e+01  -2.4503005e+01   1.5000000e+02  -7.2035670e+00   2.4313774e+00  -1.5861855e+00
   2.6405378e+01  -2.4376344e+01   1.5000000e+02  -7.3546967e+00   2.6108379e+00  -2.0356581e+00
   2.6376549e+01  -2.4250535e+01   1.5000000e+02  -7.5006840e+00   2.7976341e+00  -2.6654922e+00
   2.6342885e+01  -2.4125735e+01   1.5000000e+02  -7.5764037e+00   2.9655965e+00  -3.4731208e+00
   2.6304441e+01  -2.4002099e+01   1.5000000e+02  -7.5202737e+00   3.0857831e+00  -4.4256751e+00
   2.6261278e+01  -2.3879780e+01   1.5000000e+02  -7.2859800e+00   3.1308999e+00  -5.4638945e+00
   2.6213463e+01  -2.3758931e+01   1.5000000e+02  -6.8518631e+00   3.0799335e+00  -6.5113980e+00
   2.6161066e+01  -2.3639699e+01   1.5000000e+02  -6.2257614e+00   2.9215934e+00  -7.4879588e+00
   2.6104165e+01  -2.3522232e+01   1.5000000e+02  -5.4436964e+00   2.6554199e+00  -8.3239275e+00
   2.6042840e+01  -2.3406674e+01   1.5000000e+02  -4.5620058e+00   2.2901843e+00  -8.9723269e+00
   2.5977179e+01  -2.3293167e+01   1.5000000e+02  -3.6449687e+00   1.8403027e+00  -9.4148997e+00
   2.5907270e+01  -2.3181849e+01   1.5000000e+02  -2.7516258e+00   1.3217326e+00  -9.6607462e+00
   2.5833210e+01  -2.3072856e+01   1.5000000e+02  -1.9257989e+00   7.4889450e-01  -9.7388020e+00
   2.5755099e+01  -2.2966321e+01   1.5000000e+02  -1.1913716e+00   1.3329857e-01  -9.6875106e+00
   2.5673039e+01  -2.2862374e+01   1.5000000e+02  -5.5293448e-01  -5.1624097e-01  -9.5449594e+00
   2.5587139e+01  -2.2761140e+01   1.5000000e+02  -3.2887133e-04  -1.1924876e+00  -9.3416683e+00
   2.5497509e+01  -2.2662741e+01   1.5000000e+02   4.8496504e-01  -1.8885086e+00  -9.0968815e+00
   2.5404267e+01  -2.2567298e+01   1.5000000e+02   9.2339161e-01  -2.5966166e+00  -8.8180805e+00
   2.5307530e+01  -2.2474924e+01   1.5000000e+02   1.3322482e+00  -3.3077256e+00  -8.5028962e+00
   2.5207421e+01  -2.2385731e+01   1.5000000e+02   1.7224193e+00  -4.0107848e+00  -8.1425012e+00
   2.5104067e+01  -2.2299826e+01   1.5000000e+02   2.0969792e+00  -4.6923684e+00  -7.7256406e+00
   2.4997595e+01  -2.2217313e+01   1.5000000e+02   2.4512317e+00  -5.3364628e+00  -7.2428709e+00
   2.4888140e+01  -2.2138290e+01   1.5000000e+02   2.7737794e+00  -5.9248921e+00  -6.6906579e+00
   2.4775834e+01  -2.2062851e+01   1.5000000e+02   3.0485422e+00  -6.4390058e+00  -6.0748078e+00
   2.4660818e+01  -2.1991088e+01   1.5000000e+02   3.2574520e+00  -6.8627992e+00  -5.4124023e+00
   2.4543230e+01  -2.1923085e+01   1.5000000e+02   3.3836566e+00  -7.1872021e+00  -4.7311139e+00
   2.4423215e+01  -2.1858924e+01   1.5000000e+02   3.4145568e+00  -7.4141920e+00  -4.0655450e+00
   2.4300916e+01  -2.1798682e+01   1.5000000e+02   3.3440484e+00  -7.5592940e+00  -3.4507529e+00
   2.4176483e+01  -2.1742429e+01   1.5000000e+02   3.1733195e+00  -7.6509688e+00  -2.9145548e+00
   2.4050064e+01  -2.1690233e+01   1.5000000e+02   2.9100429e+00  -7.7264177e+00  -2.4707806e+00
   2.3921812e+01  -2.1642156e+01   1.5000000e+02   2.5662630e+00  -7.8245435e+00  -2.1157669e+00
   2.3791878e+01  -2.1598255e+01   1.5000000e+02   2.1558071e+00  -7.9781414e+00  -1.8294535e+00
   2.3660419e+01  -2.1558582e+01   1.5000000e+02   1.6922093e+00  -8.2078646e+00  -1.5807891e+00
   2.3527589e+01  -2.1523184e+01   1.5000000e+02   1.1877739e+00  -8.5199857e+00  -1.3353906e+00
   2.3393548e+01  -2.1492103e+01   1.5000000e+02   6.5394425e-01  -8.9082682e+00  -1.0626418e+00
   2.3258453e+01  -2.1465376e+01   1.5000000e+02   1.0235645e-01  -9.3586701e+00  -7.3985305e-01
   2.3122465e+01  -2.1443035e+01   1.5000000e+02  -4.5414112e-01  -9.8544775e+00  -3.5282166e-01
   2.2985743e+01  -2.1425105e+01   1.5000000e+02  -1.0012714e+00  -1.0380043e+01   1.0626947e-01
   2.2848449e+01  -2.1411609e+01   1.5000000e+02  -1.5240019e+00  -1.0922389e+01   6.4183619e-01
   2.2710745e+01  -2.1402561e+01   1.5000000e+02  -2.0079513e+00  -1.1471108e+01   1.2574494e+00
   2.2572793e+01  -2.1397974e+01   1.5000000e+02  -2.4408766e+00  -1.2017347e+01   1.9575336e+00
   2.2434756e+01  -2.1397852e+01   1.5000000e+02  -2.8138823e+00  -1.2552183e+01   2.7481794e+00
   2.2296795e+01  -2.1402195e+01   1.5000000e+02  -3.1219835e+00  -1.3064661e+01   3.6371538e+00
   2.2159073e+01  -2.1410999e+01   1.5000000e+02  -3.3639904e+00  -1.3539679e+01   4.6327619e+00
   2.2021753e+01  -2.1424252e+01   1.5000000e+02  -3.5418542e+00  -1.3956411e+01   5.7415307e+00
   2.1884995e+01  -2.1441940e+01   1.5000000e+02  -3.6596298e+00  -1.4288015e+01   6.9651343e+00
   2.1748963e+01  -2.1464041e+01   1.5000000e+02  -3.7223937e+00  -1.4503021e+01   8.2970742e+00
   2.1613815e+01  -2.1490528e+01   1.5000000e+02  -3.7352533e+00  -1.4568567e+01   9.7202832e+00
   2.1479712e+01  -2.1521372e+01   1.5000000e+02  -3.7025083e+00  -1.4455049e+01   1.1206044e+01
   2.1346812e+01  -2.1556535e+01   1.5000000e+02  -3.6270720e+00  -1.4141525e+01   1.2715040e+01
   2.1215274e+01  -2.1595975e+01   1.5000000e+02  -3.5100833e+00  -1.3620666e+01   1.4200792e+01
   2.1085253e+01  -2.1639647e+01   1.5000000e+02  -3.3508781e+00  -1.2901735e+01   1.5615215e+01
   2.0956904e+01  -2.1687497e+01   1.5000000e+02  -3.1473725e+00  -1.2010417e+01   1.6914918e+01
   2.0830381e+01  -2.1739469e+01   1.5000000e+02  -2.8967194e+00  -1.0985314e+01   1.8066791e+01
   2.0705835e+01  -2.1795501e+01   1.5000000e+02  -2.5961121e+00  -9.8721270e+00   1.9051199e+01
   2.0583416e+01  -2.1855528e+01   1.5000000e+02  -2.2433590e+00  -8.7173457e+00   1.9862335e+01
   2.0463272e+01  -2.1919476e+01   1.5000000e+02  -1.8370536e+00  -7.5629849e+00   2.0506044e+01
   2.0345548e+01  -2.1987271e+01   1.5000000e+02  -1.3761851e+00  -6.4433099e+00   2.0996186e+01
   2.0230387e+01  -2.2058831e+01   1.5000000e+02  -8.5956999e-01  -5.3837656e+00   2.1350253e+01
   2.0117930e+01  -2.2134070e+01   1.5000000e+02  -2.8537874e-01  -4.4017227e+00   2.1585303e+01
   2.0008315e+01  -2.2212900e+01   1.5000000e+02   3.4875577e-01  -3.5084018e+00   2.1714747e+01
   1.9901677e+01  -2.2295225e+01   1.5000000e+02   1.0447433e+00  -2.7112445e+00   2.1746398e+01
   1.9798149e+01  -2.2380947e+01   1.5000000e+02   1.8023653e+00  -2.0160390e+00   2.1682172e+01
   1.9697859e+01  -2.2469962e+01   1.5000000e+02   2.6171940e+00  -1.4283044e+00   2.1519264e+01
   1.9600935e+01  -2.2562165e+01   1.5000000e+02   3.4789463e+00  -9.5376443e-01   2.1252674e+01
   1.9507498e+01  -2.2657444e+01   1.5000000e+02   4.3707829e+00  -5.9777608e-01   2.0878262e+01
   1.9417668e+01  -2.2755684e+01   1.5000000e+02   5.2701302e+00  -3.6411680e-01   2.0395705e+01
   1.9331561e+01  -2.2856766e+01   1.5000000e+02   6.1507163e+00  -2.5345642e-01   1.9810388e+01
   1.9249288e+01  -2.2960568e+01   1.5000000e+02   6.9853279e+00  -2.6212185e-01   1.9133953e+01
   1.9170958e+01  -2.3066965e+01   1.5000000e+02   7.7486255e+00  -3.8156138e-01   1.8383622e+01
   1.9096674e+01  -2.3175827e+01   1.5000000e+02   8.4195422e+00  -5.9862352e-01   1.7580659e+01
   1.9026536e+01  -2.3287021e+01   1.5000000e+02   8.9832012e+00  -8.9666605e-01   1.6748447e+01
   1.8960640e+01  -2.3400412e+01   1.5000000e+02   9.4322433e+00  -1.2572216e+00   1.5910351e+01
   1.8899076e+01  -2.3515861e+01   1.5000000e+02   9.7675082e+00  -1.6619258e+00   1.5087514e+01
   1.8841930e+01  -2.3633227e+01   1.5000000e+02   9.9979398e+00  -2.0944566e+00   1.4296567e+01
   1.8789285e+01  -2.3752366e+01   1.5000000e+02   1.0139324e+01  -2.5421231e+00   1.3547484e+01
   1.8741217e+01  -2.3873132e+01   1.5000000e+02   1.0211678e+01  -2.9968061e+00   1.2842006e+01
   1.8697798e+01  -2.3995374e+01   1.5000000e+02   1.0235536e+01  -3.4550113e+00   1.2173277e+01
   1.8659095e+01  -2.4118942e+01   1.5000000e+02   1.0227814e+01  -3.9169428e+00   1.1527035e+01
   1.8625168e+01  -2.4243682e+01   1.5000000e+02   1.0198240e+01  -4.3846263e+00   1.0884446e+01
   1.8596073e+01  -2.4369440e+01   1.5000000e+02   1.0147406e+01  -4.8596956e+00   1.0225926e+01
   1.8571862e+01  -2.4496058e+01   1.5000000e+02   1.0066944e+01  -5.3413568e+00   9.5351329e+00
   1.8552579e+01  -2.4623378e+01   1.5000000e+02   9.9418038e+00  -5.8252413e+00   8.8020841e+00
   1.8538262e+01  -2.4751241e+01   1.5000000e+02   9.7539726e+00  -6.3034751e+00   8.0246842e+00
   1.8528946e+01  -2.4879485e+01   1.5000000e+02   9.4864653e+00  -6.7658256e+00   7.2083862e+00
   1.8524657e+01  -2.5007949e+01   1.5000000e+02   9.1263045e+00  -7.2013536e+00   6.3643839e+00
   1.8525417e+01  -2.5136470e+01   1.5000000e+02   8.6657735e+00  -7.6000480e+00   5.5073003e+00
   1.8531240e+01  -2.5264884e+01   1.5000000e+02   8.1019396e+00  -7.9539160e+00   4.6536097e+00
   1.8542136e+01  -2.5393029e+01   1.5000000e+02   7.4355199e+00  -8.2575673e+00   3.8214405e+00
   1.8558106e+01  -2.5520741e+01   1.5000000e+02   6.6704763e+00  -8.5083358e+00   3.0316393e+00
   1.8579146e+01  -2.5647854e+01   1.5000000e+02   5.8151521e+00  -8.7064187e+00   2.3085981e+00
   1.8605246e+01  -2.5774207e+01   1.5000000e+02   4.8845091e+00  -8.8551050e+00   1.6794524e+00
   1.8636388e+01  -2.5899636e+01   1.5000000e+02   3.9022796e+00  -8.9611284e+00   1.1709260e+00
   1.8672548e+01  -2.6023979e+01   1.5000000e+02   2.9012930e+00  -9.0349662e+00   8.0408099e-01
   1.8713696e+01  -2.6147074e+01   1.5000000e+02   1.9212155e+00  -9.0906570e+00   5.8851678e-01
   1.8759793e+01  -2.6268760e+01   1.5000000e+02   1.0037789e+00  -9.1447554e+00   5.1773822e-01
   1.8810796e+01  -2.6388879e+01   1.5000000e+02   1.8652803e-01  -9.2142784e+00   5.6709353e-01
   1.8866653e+01  -2.6507272e+01   1.5000000e+02  -5.0333048e-01  -9.3136878e+00   6.9518371e-01
   1.8927306e+01  -2.6623784e+01   1.5000000e+02  -1.0535929e+00  -9.4515661e+00   8.4859737e-01
   1.8992690e+01  -2.6738261e+01   1.5000000e+02  -1.4690533e+00  -9.6278328e+00   9.6910477e-01
   1.9062733e+01  -2.6850551e+01   1.5000000e+02  -1.7706109e+00  -9.8323740e+00   1.0018508e+00
   1.9137356e+01  -2.6960505e+01   1.5000000e+02  -1.9919128e+00  -1.0045594e+01   9.0301210e-01
   1.9216473e+01  -2.7067975e+01   1.5000000e+02  -2.1744031e+00  -1.0240910e+01   6.4572438e-01
   1.9299993e+01  -2.7172819e+01   1.5000000e+02  -2.3616850e+00  -1.0388798e+01   2.2357035e-01
   1.9387815e+01  -2.7274895e+01   1.5000000e+02  -2.5938783e+00  -1.0461778e+01  -3.4878773e-01
   1.9479834e+01  -2.7374065e+01   1.5000000e+02  -2.9026064e+00  -1.0439581e+01  -1.0381317e+00
   1.9575937e+01  -2.7470196e+01   1.5000000e+02  -3.3071026e+00  -1.0313454e+01  -1.7981476e+00
   1.9676006e+01  -2.7563157e+01   1.5000000e+02  -3.8119760e+00  -1.0088691e+01  -2.5773830e+00
   1.9779915e+01  -2.7652821e+01   1.5000000e+02  -4.4069340e+00  -9.7844617e+00  -3.3284609e+00
   1.9887532e+01  -2.7739068e+01   1.5000000e+02  -5.0686631e+00  -9.4305375e+00  -4.0171362e+00
   1.9998720e+01  -2.7821778e+01   1.5000000e+02  -5.7647612e+00  -9.0610427e+00  -4.6293128e+00
   2.0113335e+01  -2.7900838e+01   1.5000000e+02  -6.4593317e+00  -8.7059879e+00  -5.1739627e+00
   2.0231228e+01  -2.7976139e+01   1.5000000e+02  -7.1192581e+00  -8.3825143e+00  -5.6804286e+00
   2.0352244e+01  -2.8047578e+01   1.5000000e+02  -7.7195638e+00  -8.0883372e+00  -6.1896652e+00
   2.0476222e+01  -2.8115056e+01   1.5000000e+02  -8.2461335e+00  -7.8000005e+00  -6.7412464e+00
   2.0602998e+01  -2.8178480e+01   1.5000000e+02  -8.6947914e+00  -7.4772873e+00  -7.3599524e+00
   2.0732401e+01  -2.8237761e+01   1.5000000e+02  -9.0670724e+00  -7.0730636e+00  -8.0465993e+00
   2.0864256e+01  -2.8292817e+01   1.5000000e+02  -9.3645966e+00  -6.5454682e+00  -8.7767183e+00
   2.0998384e+01  -2.8343571e+01   1.5000000e+02  -9.5845348e+00  -5.8680788e+00  -9.5076614e+00
   2.1134602e+01  -2.8389953e+01   1.5000000e+02  -9.7182736e+00  -5.0341082e+00  -1.0191107e+01
   2.1272723e+01  -2.8431898e+01   1.5000000e+02  -9.7538372e+00  -4.0530635e+00  -1.0785556e+01
   2.1412557e+01  -2.8469346e+01   1.5000000e+02  -9.6809694e+00  -2.9415803e+00  -1.1263323e+01
   2.1553910e+01  -2.8502246e+01   1.5000000e+02  -9.4967266e+00  -1.7128425e+00  -1.1609098e+01
   2.2269128e+01  -2.8725255e+01   1.5000000e+02  -8.0375254e+00   5.6467899e+00  -1.0507826e+01
   2.2415792e+01  -2.8730185e+01   1.5000000e+02  -7.5666137e+00   7.5373490e+00  -9.4690816e+00
   2.2562566e+01  -2.8730523e+01   1.5000000e+02  -7.1562024e+00   9.3430439e+00  -7.9886977e+00
   2.2709259e+01  -2.8726270e+01   1.5000000e+02  -6.8239837e+00   1.0935839e+01  -6.1003389e+00
   2.2855675e+01  -2.8717431e+01   1.5000000e+02  -6.5781331e+00   1.2205403e+01  -3.8939077e+00
   2.3001624e+01  -2.8704018e+01   1.5000000e+02  -6.4184902e+00   1.3081125e+01  -1.4973113e+00
   2.3146912e+01  -2.8686049e+01   1.5000000e+02  -6.3389366e+00   1.3540779e+01   9.4881472e-01
   2.3291350e+01  -2.8663546e+01   1.5000000e+02  -6.3298173e+00   1.3606810e+01   3.3142863e+00
   2.3434748e+01  -2.8636541e+01   1.5000000e+02  -6.3794165e+00   1.3335085e+01   5.4946647e+00
   2.3576918e+01  -2.8605068e+01   1.5000000e+02  -6.4743656e+00   1.2801366e+01   7.4185963e+00
   2.3717676e+01  -2.8569169e+01   1.5000000e+02  -6.5996263e+00   1.2088459e+01   9.0488976e+00
   2.3856838e+01  -2.8528892e+01   1.5000000e+02  -6.7391105e+00   1.1275429e+01   1.0379255e+01
   2.3994225e+01  -2.8484289e+01   1.5000000e+02  -6.8772847e+00   1.0429414e+01   1.1428051e+01
   2.4129659e+01  -2.8435419e+01   1.5000000e+02  -7.0012716e+00   9.6006042e+00   1.2230152e+01
   2.4262966e+01  -2.8382346e+01   1.5000000e+02  -7.1026414e+00   8.8206604e+00   1.2828075e+01
   2.4393977e+01  -2.8325140e+01   1.5000000e+02  -7.1782235e+00   8.1044807e+00   1.3264009e+01
   2.4522525e+01  -2.8263874e+01   1.5000000e+02  -7.2299514e+00   7.4543952e+00   1.3574115e+01
   2.4648447e+01  -2.8198630e+01   1.5000000e+02  -7.2639983e+00   6.8651309e+00   1.3785835e+01
   2.4771586e+01  -2.8129492e+01   1.5000000e+02  -7.2897388e+00   6.3281100e+00   1.3917550e+01
   2.4891788e+01  -2.8056549e+01   1.5000000e+02  -7.3184682e+00   5.8342494e+00   1.3979481e+01
   2.5008905e+01  -2.7979897e+01   1.5000000e+02  -7.3617141e+00   5.3753991e+00   1.3974810e+01
   2.5122793e+01  -2.7899633e+01   1.5000000e+02  -7.4290649e+00   4.9452894e+00   1.3900735e+01
   2.5233313e+01  -2.7815863e+01   1.5000000e+02  -7.5256290e+00   4.5404894e+00   1.3750196e+01
   2.5340333e+01  -2.7728693e+01   1.5000000e+02  -7.6502027e+00   4.1615473e+00   1.3514832e+01
   2.5443724e+01  -2.7638234e+01   1.5000000e+02  -7.7950898e+00   3.8135921e+00   1.3189231e+01
   2.5543365e+01  -2.7544604e+01   1.5000000e+02  -7.9483082e+00   3.5055679e+00   1.2775226e+01
   2.5639139e+01  -2.7447920e+01   1.5000000e+02  -8.0979174e+00   3.2479322e+00   1.2284264e+01
   2.5730936e+01  -2.7348306e+01   1.5000000e+02  -8.2368349e+00   3.0491374e+00   1.1736415e+01
   2.5818651e+01  -2.7245887e+01   1.5000000e+02  -8.3663682e+00   2.9122725e+00   1.1155587e+01
   2.5902185e+01  -2.7140794e+01   1.5000000e+02  -8.4966032e+00   2.8330252e+00   1.0562382e+01
   2.5981446e+01  -2.7033159e+01   1.5000000e+02  -8.6430346e+00   2.7999009e+00   9.9671000e+00
   2.6056348e+01  -2.6923116e+01   1.5000000e+02  -8.8201546e+00   2.7966477e+00   9.3659120e+00
   2.6126811e+01  -2.6810803e+01   1.5000000e+02  -9.0342494e+00   2.8060127e+00   8.7421355e+00
   2.6192761e+01  -2.6696360e+01   1.5000000e+02  -9.2783030e+00   2.8134706e+00   8.0725231e+00
   2.6254129e+01  -2.6579929e+01   1.5000000e+02  -9.5312028e+00   2.8096636e+00   7.3363525e+00
   2.6310856e+01  -2.6461654e+01   1.5000000e+02  -9.7617144e+00   2.7909188e+00   6.5239580e+00
   2.6362886e+01  -2.6341682e+01   1.5000000e+02  -9.9358369e+00   2.7580152e+00   5.6417541e+00
   2.6410170e+01  -2.6220159e+01   1.5000000e+02  -1.0024977e+01   2.7138457e+00   4.7122394e+00
   2.6452665e+01  -2.6097235e+01   1.5000000e+02  -1.0012314e+01   2.6609711e+00   3.7694033e+00
   2.6490336e+01  -2.5973060e+01   1.5000000e+02  -9.8955244e+00   2.5999761e+00   2.8511793e+00
   2.6523153e+01  -2.5847785e+01   1.5000000e+02  -9.6852808e+00   2.5292087e+00   1.9916814e+00
   2.6551090e+01  -2.5721561e+01   1.5000000e+02  -9.4004851e+00   2.4459623e+00   1.2158405e+00
   2.6574131e+01  -2.5594542e+01   1.5000000e+02  -9.0626022e+00   2.3486127e+00   5.3812438e-01
   2.6592264e+01  -2.5466880e+01   1.5000000e+02  -8.6919114e+00   2.2388233e+00  -3.5092155e-02
   2.6605482e+01  -2.5338729e+01   1.5000000e+02  -8.3074933e+00   2.1229181e+00  -5.0195551e-01
   2.6613785e+01  -2.5210243e+01   1.5000000e+02  -7.9301828e+00   2.0118503e+00  -8.6375432e-01
   2.6617180e+01  -2.5081574e+01   1.5000000e+02  -7.5854050e+00   1.9197706e+00  -1.1274415e+00
   2.6615678e+01  -2.4952875e+01   1.5000000e+02  -7.3024589e+00   1.8617037e+00  -1.3107336e+00
   2.6609296e+01  -2.4824299e+01   1.5000000e+02  -7.1089477e+00   1.8509694e+00  -1.4461694e+00
   2.6598056e+01  -2.4695999e+01   1.5000000e+02  -7.0222438e+00   1.8967796e+00  -1.5806042e+00
   2.6581987e+01  -2.4568124e+01   1.5000000e+02  -7.0417059e+00   2.0021154e+00  -1.7691131e+00
   2.6561123e+01  -2.4440827e+01   1.5000000e+02  -7.1448802e+00   2.1619346e+00  -2.0649472e+00
   2.6535501e+01  -2.4314254e+01   1.5000000e+02  -7.2889840e+00   2.3620500e+00  -2.5086604e+00
   2.6505167e+01  -2.4188555e+01   1.5000000e+02  -7.4170816e+00   2.5792813e+00  -3.1191417e+00
   2.6470168e+01  -2.4063876e+01   1.5000000e+02  -7.4674398e+00   2.7835509e+00  -3.8884328e+00
   2.6430559e+01  -2.3940361e+01   1.5000000e+02  -7.3842290e+00   2.9419100e+00  -4.7811946e+00
   2.6386398e+01  -2.3818154e+01   1.5000000e+02  -7.1278683e+00   3.0238330e+00  -5.7390625e+00
   2.6337749e+01  -2.3697395e+01   1.5000000e+02  -6.6831275e+00   3.0064163e+00  -6.6897160e+00
   2.6284679e+01  -2.3578225e+01   1.5000000e+02  -6.0629936e+00   2.8779450e+00  -7.5594158e+00
   2.6227262e+01  -2.3460779e+01   1.5000000e+02  -5.3065302e+00   2.6386493e+00  -8.2866341e+00
   2.6165574e+01  -2.3345193e+01   1.5000000e+02  -4.4705858e+00   2.2984309e+00  -8.8329559e+00
   2.6099696e+01  -2.3231599e+01   1.5000000e+02  -3.6173227e+00   1.8725434e+00  -9.1879690e+00
   2.6029713e+01  -2.3120126e+01   1.5000000e+02  -2.8014740e+00   1.3770299e+00  -9.3667947e+00
   2.5955714e+01  -2.3010902e+01   1.5000000e+02  -2.0610500e+00   8.2558050e-01  -9.4018881e+00
   2.5877794e+01  -2.2904050e+01   1.5000000e+02  -1.4134634e+00   2.2850173e-01  -9.3324329e+00
   2.5796047e+01  -2.2799692e+01   1.5000000e+02  -8.5701443e-01  -4.0653058e-01  -9.1946768e+00
   2.5710576e+01  -2.2697946e+01   1.5000000e+02  -3.7621849e-01  -1.0728694e+00  -9.0152888e+00
   2.5621484e+01  -2.2598927e+01   1.5000000e+02   5.1213227e-02  -1.7634496e+00  -8.8085342e+00
   2.5528878e+01  -2.2502747e+01   1.5000000e+02   4.4767422e-01  -2.4699341e+00  -8.5767571e+00
   2.5432870e+01  -2.2409513e+01   1.5000000e+02   8.3070416e-01  -3.1824626e+00  -8.3130789e+00
   2.5333573e+01  -2.2319331e+01   1.5000000e+02   1.2103170e+00  -3.8895907e+00  -8.0051081e+00
   2.5231104e+01  -2.2232302e+01   1.5000000e+02   1.5883045e+00  -4.5780754e+00  -7.6387626e+00
   2.5125583e+01  -2.2148524e+01   1.5000000e+02   1.9588965e+00  -5.2324390e+00  -7.2019290e+00
   2.5017132e+01  -2.2068090e+01   1.5000000e+02   2.3101469e+00  -5.8347535e+00  -6.6879260e+00
   2.4905878e+01  -2.1991089e+01   1.5000000e+02   2.6257352e+00  -6.3653266e+00  -6.0987127e+00
   2.4791947e+01  -2.1917609e+01   1.5000000e+02   2.8871859e+00  -6.8049583e+00  -5.4472741e+00
   2.4675470e+01  -2.1847731e+01   1.5000000e+02   3.0763858e+00  -7.1388011e+00  -4.7582372e+00
   2.4556580e+01  -2.1781533e+01   1.5000000e+02   3.1782339e+00  -7.3610139e+00  -4.0658498e+00
   2.4435411e+01  -2.1719088e+01   1.5000000e+02   3.1828853e+00  -7.4787612e+00  -3.4090129e+00
   2.4312100e+01  -2.1660467e+01   1.5000000e+02   3.0870677e+00  -7.5138769e+00  -2.8241501e+00
   2.4186786e+01  -2.1605733e+01   1.5000000e+02   2.8940859e+00  -7.5010290e+00  -2.3375370e+00
   2.4059608e+01  -2.1554947e+01   1.5000000e+02   2.6125426e+00  -7.4822683e+00  -1.9594497e+00
   2.3930710e+01  -2.1508167e+01   1.5000000e+02   2.2541970e+00  -7.4992423e+00  -1.6820363e+00
   2.3800234e+01  -2.1465444e+01   1.5000000e+02   1.8317055e+00  -7.5853986e+00  -1.4817478e+00
   2.3668325e+01  -2.1426825e+01   1.5000000e+02   1.3571029e+00  -7.7607144e+00  -1.3255537e+00
   2.3535131e+01  -2.1392352e+01   1.5000000e+02   8.4144313e-01  -8.0305028e+00  -1.1785651e+00
   2.3400797e+01  -2.1362065e+01   1.5000000e+02   2.9549100e-01  -8.3881812e+00  -1.0103352e+00
   2.3265473e+01  -2.1335996e+01   1.5000000e+02  -2.6913294e-01  -8.8201430e+00  -7.9794875e-01
   2.3129308e+01  -2.1314174e+01   1.5000000e+02  -8.3916392e-01  -9.3105609e+00  -5.2574915e-01
   2.2992451e+01  -2.1296624e+01   1.5000000e+02  -1.3997600e+00  -9.8443828e+00  -1.8302935e-01
   2.2855053e+01  -2.1283364e+01   1.5000000e+02  -1.9354562e+00  -1.0408274e+01   2.3853548e-01
   2.2717265e+01  -2.1274410e+01   1.5000000e+02  -2.4316204e+00  -1.0990287e+01   7.4669367e-01
   2.2579239e+01  -2.1269771e+01   1.5000000e+02  -2.8759400e+00  -1.1578936e+01   1.3494929e+00
   2.2441126e+01  -2.1269452e+01   1.5000000e+02  -3.2594991e+00  -1.2162087e+01   2.0555676e+00
   2.2303077e+01  -2.1273454e+01   1.5000000e+02  -3.5772333e+00  -1.2725552e+01   2.8738548e+00
   2.2165245e+01  -2.1281773e+01   1.5000000e+02  -3.8277204e+00  -1.3251533e+01   3.8125105e+00
   2.2027780e+01  -2.1294398e+01   1.5000000e+02  -4.0124599e+00  -1.3717422e+01   4.8769230e+00
   2.1890834e+01  -2.1311317e+01   1.5000000e+02  -4.1348643e+00  -1.4095536e+01   6.0669883e+00
   2.1754557e+01  -2.1332510e+01   1.5000000e+02  -4.1993889e+00  -1.4354317e+01   7.3742156e+00
   2.1619100e+01  -2.1357955e+01   1.5000000e+02  -4.2108637e+00  -1.4461199e+01   8.7794640e+00
   2.1484611e+01  -2.1387622e+01   1.5000000e+02  -4.1740986e+00  -1.4386936e+01   1.0252039e+01
   2.1351239e+01  -2.1421479e+01   1.5000000e+02  -4.0935265e+00  -1.4110770e+01   1.1750859e+01
   2.1219132e+01  -2.1459490e+01   1.5000000e+02  -3.9728486e+00  -1.3625263e+01   1.3228043e+01
   2.1088435e+01  -2.1501611e+01   1.5000000e+02  -3.8146732e+00  -1.2939236e+01   1.4634557e+01
   2.0959295e+01  -2.1547796e+01   1.5000000e+02  -3.6202520e+00  -1.2077637e+01   1.5926652e+01
   2.0831855e+01  -2.1597994e+01   1.5000000e+02  -3.3895171e+00  -1.1078037e+01   1.7071333e+01
   2.0706257e+01  -2.1652149e+01   1.5000000e+02  -3.1214383e+00  -9.9849247e+00   1.8049311e+01
   2.0582642e+01  -2.1710202e+01   1.5000000e+02  -2.8145727e+00  -8.8435298e+00   1.8855099e+01
   2.0461148e+01  -2.1772087e+01   1.5000000e+02  -2.4675670e+00  -7.6947614e+00   1.9494791e+01
   2.0341913e+01  -2.1837736e+01   1.5000000e+02  -2.0793205e+00  -6.5721497e+00   1.9982638e+01
   2.0225072e+01  -2.1907076e+01   1.5000000e+02  -1.6487654e+00  -5.5007849e+00   2.0337271e+01
   2.0110758e+01  -2.1980030e+01   1.5000000e+02  -1.1743903e+00  -4.4979310e+00   2.0578230e+01
   1.9999101e+01  -2.2056517e+01   1.5000000e+02  -6.5384493e-01  -3.5746665e+00   2.0723100e+01
   1.9890229e+01  -2.2136450e+01   1.5000000e+02  -8.4006315e-02  -2.7379534e+00   2.0785446e+01
   1.9784268e+01  -2.2219741e+01   1.5000000e+02   5.3829321e-01  -1.9925590e+00   2.0773685e+01
   1.9681341e+01  -2.2306297e+01   1.5000000e+02   1.2147788e+00  -1.3425119e+00   2.0690869e+01
   1.9581569e+01  -2.2396020e+01   1.5000000e+02   1.9438542e+00  -7.9192869e-01   2.0535557e+01
   1.9485068e+01  -2.2488810e+01   1.5000000e+02   2.7189441e+00  -3.4512971e-01   2.0303652e+01
   1.9391954e+01  -2.2584563e+01   1.5000000e+02   3.5276547e+00  -6.1264117e-03   1.9990891e+01
   1.9302337e+01  -2.2683170e+01   1.5000000e+02   4.3521790e+00   2.2247373e-01   1.9595261e+01
   1.9216325e+01  -2.2784521e+01   1.5000000e+02   5.1708936e+00   3.4072104e-01   1.9118798e+01
   1.9134023e+01  -2.2888502e+01   1.5000000e+02   5.9605525e+00   3.5239615e-01   1.8568266e+01
   1.9055532e+01  -2.2994993e+01   1.5000000e+02   6.6985736e+00   2.6551471e-01   1.7954839e+01
   1.8980949e+01  -2.3103875e+01   1.5000000e+02   7.3651114e+00   9.2042376e-02   1.7293093e+01
   1.8910369e+01  -2.3215024e+01   1.5000000e+02   7.9446012e+00  -1.5309481e-01   1.6599713e+01
   1.8843880e+01  -2.3328314e+01   1.5000000e+02   8.4269870e+00  -4.5353910e-01   1.5892099e+01
   1.8781568e+01  -2.3443614e+01   1.5000000e+02   8.8086022e+00  -7.9328401e-01   1.5187000e+01
   1.8723516e+01  -2.3560794e+01   1.5000000e+02   9.0926339e+00  -1.1584195e+00   1.4498980e+01
   1.8669801e+01  -2.3679719e+01   1.5000000e+02   9.2887600e+00  -1.5384520e+00   1.3838817e+01
   1.8620496e+01  -2.3800252e+01   1.5000000e+02   9.4118257e+00  -1.9270702e+00   1.3211989e+01
   1.8575669e+01  -2.3922254e+01   1.5000000e+02   9.4793794e+00  -2.3220802e+00   1.2617661e+01
   1.8535385e+01  -2.4045585e+01   1.5000000e+02   9.5084437e+00  -2.7244928e+00   1.2048622e+01
   1.8499702e+01  -2.4170102e+01   1.5000000e+02   9.5121475e+00  -3.1368370e+00   1.1492377e+01
   1.8468677e+01  -2.4295659e+01   1.5000000e+02   9.4971027e+00  -3.5612101e+00   1.0933282e+01
   1.8442357e+01  -2.4422112e+01   1.5000000e+02   9.4620677e+00  -3.9974809e+00   1.0355319e+01
   1.8420789e+01  -2.4549313e+01   1.5000000e+02   9.3983812e+00  -4.4423290e+00   9.7449883e+00
   1.8404011e+01  -2.4677111e+01   1.5000000e+02   9.2919313e+00  -4.8892466e+00   9.0936806e+00
   1.8392057e+01  -2.4805359e+01   1.5000000e+02   9.1262600e+00  -5.3296186e+00   8.3989311e+00
   1.8384957e+01  -2.4933903e+01   1.5000000e+02   8.8858145e+00  -5.7541812e+00   7.6644438e+00
   1.8382734e+01  -2.5062593e+01   1.5000000e+02   8.5583095e+00  -6.1544606e+00   6.8988971e+00
   1.8385406e+01  -2.5191276e+01   1.5000000e+02   8.1356289e+00  -6.5236570e+00   6.1145142e+00
   1.8392985e+01  -2.5319800e+01   1.5000000e+02   7.6134451e+00  -6.8569172e+00   5.3262450e+00
   1.8405478e+01  -2.5448010e+01   1.5000000e+02   6.9906658e+00  -7.1511511e+00   4.5521042e+00
   1.8422886e+01  -2.5575753e+01   1.5000000e+02   6.2697991e+00  -7.4047393e+00   3.8140544e+00
   1.8445204e+01  -2.5702876e+01   1.5000000e+02   5.4587073e+00  -7.6174404e+00   3.1382359e+00
   1.8472420e+01  -2.5829227e+01   1.5000000e+02   4.5729981e+00  -7.7906667e+00   2.5533177e+00
   1.8504519e+01  -2.5954652e+01   1.5000000e+02   3.6376889e+00  -7.9281103e+00   2.0866447e+00
   1.8541475e+01  -2.6078999e+01   1.5000000e+02   2.6868145e+00  -8.0363130e+00   1.7590206e+00
   1.8583262e+01  -2.6202117e+01   1.5000000e+02   1.7605505e+00  -8.1250602e+00   1.5793639e+00
   1.8629842e+01  -2.6323855e+01   1.5000000e+02   9.0030123e-01  -8.2069031e+00   1.5409182e+00
   1.8681175e+01  -2.6444066e+01   1.5000000e+02   1.4273694e-01  -8.2958808e+00   1.6197453e+00
   1.8737212e+01  -2.6562600e+01   1.5000000e+02  -4.8577883e-01  -8.4051903e+00   1.7761635e+00
   1.8797900e+01  -2.6679312e+01   1.5000000e+02  -9.7340948e-01  -8.5443316e+00   1.9588961e+00
   1.8863178e+01  -2.6794057e+01   1.5000000e+02  -1.3247400e+00  -8.7163432e+00   2.1113340e+00
   1.8932980e+01  -2.6906693e+01   1.5000000e+02  -1.5602382e+00  -8.9159768e+00   2.1788515e+00
   1.9007232e+01  -2.7017079e+01   1.5000000e+02  -1.7134673e+00  -9.1293189e+00   2.1160381e+00
   1.9085856e+01  -2.7125079e+01   1.5000000e+02  -1.8266975e+00  -9.3351081e+00   1.8927641e+00
   1.9168766e+01  -2.7230555e+01   1.5000000e+02  -1.9455862e+00  -9.5075671e+00   1.4983231e+00
   1.9255870e+01  -2.7333376e+01   1.5000000e+02  -2.1136008e+00  -9.6204377e+00   9.4308991e-01
   1.9347071e+01  -2.7433411e+01   1.5000000e+02  -2.3667777e+00  -9.6517308e+00   2.5724664e-01
   1.9442266e+01  -2.7530535e+01   1.5000000e+02  -2.7293501e+00  -9.5883309e+00  -5.1346183e-01
   1.9541343e+01  -2.7624624e+01   1.5000000e+02  -3.2107979e+00  -9.4295696e+00  -1.3147068e+00
   1.9644189e+01  -2.7715557e+01   1.5000000e+02  -3.8048122e+00  -9.1887621e+00  -2.0925936e+00
   1.9750682e+01  -2.7803219e+01   1.5000000e+02  -4.4903732e+00  -8.8918588e+00  -2.8032252e+00
   1.9860694e+01  -2.7887498e+01   1.5000000e+02  -5.2351565e+00  -8.5730231e+00  -3.4213431e+00
   1.9974094e+01  -2.7968285e+01   1.5000000e+02  -6.0009921e+00  -8.2673247e+00  -3.9458847e+00
   2.0090744e+01  -2.8045476e+01   1.5000000e+02  -6.7505181e+00  -8.0017661e+00  -4.4003457e+00
   2.0210501e+01  -2.8118972e+01   1.5000000e+02  -7.4535416e+00  -7.7869139e+00  -4.8268376e+00
   2.0333216e+01  -2.8188677e+01   1.5000000e+02  -8.0911134e+00  -7.6118840e+00  -5.2744567e+00
   2.0458737e+01  -2.8254501e+01   1.5000000e+02  -8.6558718e+00  -7.4448963e+00  -5.7849608e+00
   2.0586908e+01  -2.8316358e+01   1.5000000e+02  -9.1484409e+00  -7.2399811e+00  -6.3803079e+00
   2.0717566e+01  -2.8374168e+01   1.5000000e+02  -9.5714378e+00  -6.9480731e+00  -7.0563751e+00
   2.0850545e+01  -2.8427855e+01   1.5000000e+02  -9.9236545e+00  -6.5288675e+00  -7.7852139e+00
   2.0985676e+01  -2.8477349e+01   1.5000000e+02  -1.0196897e+01  -5.9591288e+00  -8.5246571e+00
   2.1122786e+01  -2.8522585e+01   1.5000000e+02  -1.0376730e+01  -5.2343512e+00  -9.2311975e+00
   2.1261698e+01  -2.8563504e+01   1.5000000e+02  -1.0446658e+01  -4.3633118e+00  -9.8705934e+00
   2.1402232e+01  -2.8600051e+01   1.5000000e+02  -1.0393861e+01  -3.3581021e+00  -1.0421772e+01
   2.1544205e+01  -2.8632180e+01   1.5000000e+02  -1.0214298e+01  -2.2242143e+00  -1.0872454e+01
   2.1687434e+01  -2.8659846e+01   1.5000000e+02  -9.9155209e+00  -9.5527294e-01  -1.1208555e+01
   2.1831730e+01  -2.8683015e+01   1.5000000e+02  -9.5169255e+00   4.6419030e-01  -1.1401518e+01
   2.1976905e+01  -2.8701654e+01   1.5000000e+02  -9.0475250e+00   2.0475492e+00  -1.1399706e+01
   2.2122768e+01  -2.8715741e+01   1.5000000e+02  -8.5422774e+00   3.7888950e+00  -1.1129243e+01
   2.2871159e+01  -2.8845191e+01   1.5000000e+02  -6.4959309e+00   1.2044604e+01  -3.6923831e+00
   2.3016710e+01  -2.8831814e+01   1.5000000e+02  -6.1708533e+00   1.2937577e+01  -1.2707248e+00
   2.3161629e+01  -2.8814061e+01   1.5000000e+02  -5.9350917e+00   1.3401991e+01   1.2082228e+00
   2.3305737e+01  -2.8791954e+01   1.5000000e+02  -5.7856999e+00   1.3462503e+01   3.6109805e+00
   2.3448861e+01  -2.8765519e+01   1.5000000e+02  -5.7147629e+00   1.3176536e+01   5.8319650e+00
   2.3590824e+01  -2.8734790e+01   1.5000000e+02  -5.7101950e+00   1.2619931e+01   7.7994512e+00
   2.3731456e+01  -2.8699805e+01   1.5000000e+02  -5.7564526e+00   1.1874398e+01   9.4753619e+00
   2.3870586e+01  -2.8660605e+01   1.5000000e+02  -5.8357670e+00   1.1017859e+01   1.0851069e+01
   2.4008046e+01  -2.8617239e+01   1.5000000e+02  -5.9301072e+00   1.0117449e+01   1.1941432e+01
   2.4143671e+01  -2.8569760e+01   1.5000000e+02  -6.0236432e+00   9.2250488e+00   1.2777576e+01
   2.4277300e+01  -2.8518226e+01   1.5000000e+02  -6.1048552e+00   8.3755023e+00   1.3399103e+01
   2.4408774e+01  -2.8462700e+01   1.5000000e+02  -6.1676718e+00   7.5877170e+00   1.3846765e+01
   2.4537936e+01  -2.8403249e+01   1.5000000e+02  -6.2114770e+00   6.8681471e+00   1.4156977e+01
   2.4664636e+01  -2.8339946e+01   1.5000000e+02  -6.2402948e+00   6.2153437e+00   1.4359031e+01
   2.4788725e+01  -2.8272867e+01   1.5000000e+02  -6.2617828e+00   5.6241362e+00   1.4474697e+01
   2.4910059e+01  -2.8202094e+01   1.5000000e+02  -6.2861860e+00   5.0882340e+00   1.4519141e+01
   2.5028498e+01  -2.8127711e+01   1.5000000e+02  -6.3252415e+00   4.6013681e+00   1.4501715e+01
   2.5143907e+01  -2.8049808e+01   1.5000000e+02  -6.3905194e+00   4.1576373e+00   1.4426113e+01
   2.5256155e+01  -2.7968479e+01   1.5000000e+02  -6.4910803e+00   3.7520720e+00   1.4290326e+01
   2.5365115e+01  -2.7883822e+01   1.5000000e+02  -6.6307494e+00   3.3818119e+00   1.4087580e+01
   2.5470667e+01  -2.7795936e+01   1.5000000e+02  -6.8060863e+00   3.0475404e+00   1.3809212e+01
   2.5572694e+01  -2.7704927e+01   1.5000000e+02  -7.0063007e+00   2.7542242e+00   1.3449304e+01
   2.5671085e+01  -2.7610903e+01   1.5000000e+02  -7.2159037e+00   2.5102476e+00   1.3009464e+01
   2.5765733e+01  -2.7513975e+01   1.5000000e+02  -7.4195707e+00   2.3248077e+00   1.2501561e+01
   2.5856538e+01  -2.7414257e+01   1.5000000e+02  -7.6076357e+00   2.2043414e+00   1.1946657e+01
   2.5943405e+01  -2.7311868e+01   1.5000000e+02  -7.7801482e+00   2.1493776e+00   1.1369965e+01
   2.6026242e+01  -2.7206926e+01   1.5000000e+02  -7.9477149e+00   2.1530436e+00   1.0793199e+01
   2.6104966e+01  -2.7099554e+01   1.5000000e+02  -8.1282057e+00   2.2017439e+00   1.0227093e+01
   2.6179498e+01  -2.6989879e+01   1.5000000e+02  -8.3400894e+00   2.2779124e+00   9.6670018e+00
   2.6249764e+01  -2.6878026e+01   1.5000000e+02  -8.5944790e+00   2.3637894e+00   9.0936500e+00
   2.6315695e+01  -2.6764125e+01   1.5000000e+02  -8.8888195e+00   2.4449220e+00   8.4792687e+00
   2.6377231e+01  -2.6648309e+01   1.5000000e+02  -9.2048275e+00   2.5123344e+00   7.7969961e+00
   2.6434314e+01  -2.6530709e+01   1.5000000e+02  -9.5115968e+00   2.5628303e+00   7.0302416e+00
   2.6486893e+01  -2.6411461e+01   1.5000000e+02  -9.7727052e+00   2.5974845e+00   6.1789271e+00
   2.6534923e+01  -2.6290702e+01   1.5000000e+02  -9.9549430e+00   2.6190711e+00   5.2606120e+00
   2.6578363e+01  -2.6168567e+01   1.5000000e+02  -1.0035751e+01   2.6293728e+00   4.3065319e+00
   2.6617180e+01  -2.6045196e+01   1.5000000e+02  -1.0007177e+01   2.6273674e+00   3.3542415e+00
   2.6651344e+01  -2.5920729e+01   1.5000000e+02  -9.8754468e+00   2.6089541e+00   2.4392949e+00
   2.6680833e+01  -2.5795305e+01   1.5000000e+02  -9.6566578e+00   2.5682963e+00   1.5889230e+00
   2.6705628e+01  -2.5669065e+01   1.5000000e+02  -9.3706479e+00   2.5002901e+00   8.1980176e-01
   2.6725717e+01  -2.5542152e+01   1.5000000e+02  -9.0359439e+00   2.4032804e+00   1.4019403e-01
   2.6741092e+01  -2.5414705e+01   1.5000000e+02  -8.6682861e+00   2.2810633e+00  -4.4549620e-01
   2.6751752e+01  -2.5286867e+01   1.5000000e+02  -8.2832780e+00   2.1435447e+00  -9.3318741e-01
   2.6757700e+01  -2.5158780e+01   1.5000000e+02  -7.9007949e+00   2.0058607e+00  -1.3197368e+00
   2.6758944e+01  -2.5030584e+01   1.5000000e+02  -7.5473518e+00   1.8863135e+00  -1.6078770e+00
   2.6755498e+01  -2.4902422e+01   1.5000000e+02  -7.2535998e+00   1.8037011e+00  -1.8125495e+00
   2.6747379e+01  -2.4774434e+01   1.5000000e+02  -7.0471519e+00   1.7745274e+00  -1.9644272e+00
   2.6734612e+01  -2.4646759e+01   1.5000000e+02  -6.9439085e+00   1.8103672e+00  -2.1079561e+00
   2.6717224e+01  -2.4519538e+01   1.5000000e+02  -6.9415988e+00   1.9154419e+00  -2.2942581e+00
   2.6695248e+01  -2.4392908e+01   1.5000000e+02  -7.0177596e+00   2.0846175e+00  -2.5715479e+00
   2.6668722e+01  -2.4267007e+01   1.5000000e+02  -7.1322592e+00   2.3023138e+00  -2.9758378e+00
   2.6637687e+01  -2.4141970e+01   1.5000000e+02  -7.2332183e+00   2.5430375e+00  -3.5238583e+00
   2.6602190e+01  -2.4017934e+01   1.5000000e+02  -7.2650048e+00   2.7740038e+00  -4.2090116e+00
   2.6562281e+01  -2.3895031e+01   1.5000000e+02  -7.1772729e+00   2.9597650e+00  -5.0008579e+00
   2.6518015e+01  -2.3773393e+01   1.5000000e+02  -6.9339747e+00   3.0679321e+00  -5.8484585e+00
   2.6469452e+01  -2.3653150e+01   1.5000000e+02  -6.5208870e+00   3.0746106e+00  -6.6878870e+00
   2.6416655e+01  -2.3534430e+01   1.5000000e+02  -5.9496376e+00   2.9679713e+00  -7.4532842e+00
   2.6359690e+01  -2.3417361e+01   1.5000000e+02  -5.2563272e+00   2.7488112e+00  -8.0893694e+00
   2.6298630e+01  -2.3302065e+01   1.5000000e+02  -4.4941239e+00   2.4279160e+00  -8.5619824e+00
   2.6233547e+01  -2.3188666e+01   1.5000000e+02  -3.7216186e+00   2.0212878e+00  -8.8631458e+00
   2.6164521e+01  -2.3077283e+01   1.5000000e+02  -2.9903834e+00   1.5451676e+00  -9.0091040e+00
   2.6091634e+01  -2.2968034e+01   1.5000000e+02  -2.3355539e+00   1.0126547e+00  -9.0325243e+00
   2.6014971e+01  -2.2861034e+01   1.5000000e+02  -1.7716265e+00   4.3277000e-01  -8.9719613e+00
   2.5934621e+01  -2.2756394e+01   1.5000000e+02  -1.2937565e+00  -1.8838098e-01  -8.8619916e+00
   2.5850676e+01  -2.2654226e+01   1.5000000e+02  -8.8321555e-01  -8.4544051e-01  -8.7264959e+00
   2.5763230e+01  -2.2554635e+01   1.5000000e+02  -5.1481934e-01  -1.5319157e+00  -8.5760282e+00
   2.5672383e+01  -2.2457726e+01   1.5000000e+02  -1.6411742e-01  -2.2392144e+00  -8.4089265e+00
   2.5578234e+01  -2.2363601e+01   1.5000000e+02   1.8746158e-01  -2.9567901e+00  -8.2147376e+00
   2.5480888e+01  -2.2272356e+01   1.5000000e+02   5.5006405e-01  -3.6727442e+00  -7.9783422e+00
   2.5380451e+01  -2.2184087e+01   1.5000000e+02   9.2525729e-01  -4.3742136e+00  -7.6836668e+00
   2.5277033e+01  -2.2098885e+01   1.5000000e+02   1.3072559e+00  -5.0471691e+00  -7.3165804e+00
   2.5170746e+01  -2.2016839e+01   1.5000000e+02   1.6846712e+00  -5.6757204e+00  -6.8673072e+00
   2.5061703e+01  -2.1938034e+01   1.5000000e+02   2.0422093e+00  -6.2416479e+00  -6.3327699e+00
   2.4950021e+01  -2.1862551e+01   1.5000000e+02   2.3622420e+00  -6.7250271e+00  -5.7189666e+00
   2.4835818e+01  -2.1790468e+01   1.5000000e+02   2.6264828e+00  -7.1066177e+00  -5.0427902e+00
   2.4719216e+01  -2.1721859e+01   1.5000000e+02   2.8178548e+00  -7.3719275e+00  -4.3323019e+00
   2.4600336e+01  -2.1656796e+01   1.5000000e+02   2.9224822e+00  -7.5160162e+00  -3.6245245e+00
   2.4479304e+01  -2.1595345e+01   1.5000000e+02   2.9313883e+00  -7.5474978e+00  -2.9605283e+00
   2.4356246e+01  -2.1537569e+01   1.5000000e+02   2.8415378e+00  -7.4900994e+00  -2.3784861e+00
   2.4231289e+01  -2.1483527e+01   1.5000000e+02   2.6558458e+00  -7.3806924e+00  -1.9063092e+00
   2.4104564e+01  -2.1433276e+01   1.5000000e+02   2.3821344e+00  -7.2637666e+00  -1.5559719e+00
   2.3976201e+01  -2.1386867e+01   1.5000000e+02   2.0313015e+00  -7.1836178e+00  -1.3213499e+00
   2.3846332e+01  -2.1344346e+01   1.5000000e+02   1.6153456e+00  -7.1765716e+00  -1.1804643e+00
   2.3715091e+01  -2.1305759e+01   1.5000000e+02   1.1459561e+00  -7.2656989e+00  -1.1013058e+00
   2.3582613e+01  -2.1271144e+01   1.5000000e+02   6.3407852e-01  -7.4594706e+00  -1.0490405e+00
   2.3449032e+01  -2.1240537e+01   1.5000000e+02   9.0482783e-02  -7.7542657e+00  -9.9206326e-01
   2.3314487e+01  -2.1213968e+01   1.5000000e+02  -4.7324142e-01  -8.1389541e+00  -9.0505474e-01
   2.3179113e+01  -2.1191466e+01   1.5000000e+02  -1.0439943e+00  -8.5994524e+00  -7.6889147e-01
   2.3043048e+01  -2.1173053e+01   1.5000000e+02  -1.6072207e+00  -9.1214999e+00  -5.6867310e-01
   2.2906432e+01  -2.1158749e+01   1.5000000e+02  -2.1477583e+00  -9.6915391e+00  -2.9155813e-01
   2.2769404e+01  -2.1148566e+01   1.5000000e+02  -2.6512116e+00  -1.0296346e+01   7.4534122e-02
   2.2632101e+01  -2.1142517e+01   1.5000000e+02  -3.1053131e+00  -1.0922369e+01   5.4133355e-01
   2.2494664e+01  -2.1140607e+01   1.5000000e+02  -3.5009955e+00  -1.1555003e+01   1.1200442e+00
   2.2357233e+01  -2.1142839e+01   1.5000000e+02  -3.8328908e+00  -1.2177914e+01   1.8210099e+00
   2.2219947e+01  -2.1149209e+01   1.5000000e+02  -4.0991749e+00  -1.2772116e+01   2.6529725e+00
   2.2082945e+01  -2.1159712e+01   1.5000000e+02  -4.3007972e+00  -1.3315052e+01   3.6217798e+00
   2.1946367e+01  -2.1174336e+01   1.5000000e+02  -4.4404550e+00  -1.3780054e+01   4.7283445e+00
   2.1810352e+01  -2.1193067e+01   1.5000000e+02  -4.5216545e+00  -1.4136774e+01   5.9662369e+00
   2.1675037e+01  -2.1215886e+01   1.5000000e+02  -4.5481895e+00  -1.4352973e+01   7.3192971e+00
   2.1540561e+01  -2.1242768e+01   1.5000000e+02  -4.5240429e+00  -1.4397877e+01   8.7600390e+00
   2.1407062e+01  -2.1273688e+01   1.5000000e+02  -4.4534927e+00  -1.4246847e+01   1.0249851e+01
   2.1274674e+01  -2.1308613e+01   1.5000000e+02  -4.3411571e+00  -1.3886389e+01   1.1741494e+01
   2.1143535e+01  -2.1347507e+01   1.5000000e+02  -4.1917419e+00  -1.3318116e+01   1.3184030e+01
   2.1013778e+01  -2.1390331e+01   1.5000000e+02  -4.0095152e+00  -1.2560042e+01   1.4529412e+01
   2.0885538e+01  -2.1437040e+01   1.5000000e+02  -3.7977052e+00  -1.1644526e+01   1.5738678e+01
   2.0758945e+01  -2.1487588e+01   1.5000000e+02  -3.5580644e+00  -1.0613272e+01   1.6786233e+01
   2.0634131e+01  -2.1541921e+01   1.5000000e+02  -3.2908763e+00  -9.5111531e+00   1.7660898e+01
   2.0511225e+01  -2.1599984e+01   1.5000000e+02  -2.9953430e+00  -8.3805148e+00   1.8364370e+01
   2.0390356e+01  -2.1661718e+01   1.5000000e+02  -2.6702031e+00  -7.2573351e+00   1.8907943e+01
   2.0271649e+01  -2.1727059e+01   1.5000000e+02  -2.3142214e+00  -6.1694477e+00   1.9308848e+01
   2.0155228e+01  -2.1795940e+01   1.5000000e+02  -1.9263313e+00  -5.1366190e+00   1.9586994e+01
   2.0041217e+01  -2.1868290e+01   1.5000000e+02  -1.5053964e+00  -4.1718087e+00   1.9762408e+01
   1.9929736e+01  -2.1944034e+01   1.5000000e+02  -1.0497577e+00  -3.2829513e+00   1.9853385e+01
   1.9820903e+01  -2.2023094e+01   1.5000000e+02  -5.5690191e-01  -2.4748051e+00   1.9875192e+01
   1.9714834e+01  -2.2105388e+01   1.5000000e+02  -2.3582030e-02  -1.7504504e+00   1.9839171e+01
   1.9611643e+01  -2.2190831e+01   1.5000000e+02   5.5339880e-01  -1.1123170e+00   1.9752217e+01
   1.9511443e+01  -2.2279334e+01   1.5000000e+02   1.1757596e+00  -5.6278828e-01   1.9616776e+01
   1.9414341e+01  -2.2370806e+01   1.5000000e+02   1.8420778e+00  -1.0440109e-01   1.9431573e+01
   1.9320445e+01  -2.2465151e+01   1.5000000e+02   2.5464346e+00   2.6029215e-01   1.9193185e+01
   1.9229858e+01  -2.2562272e+01   1.5000000e+02   3.2780191e+00   5.2935369e-01   1.8898023e+01
   1.9142681e+01  -2.2662066e+01   1.5000000e+02   4.0217345e+00   7.0239374e-01   1.8544203e+01
   1.9059011e+01  -2.2764431e+01   1.5000000e+02   4.7597040e+00   7.8159939e-01   1.8132746e+01
   1.8978944e+01  -2.2869257e+01   1.5000000e+02   5.4729657e+00   7.7247146e-01   1.7667900e+01
   1.8902571e+01  -2.2976436e+01   1.5000000e+02   6.1431892e+00   6.8397554e-01   1.7156766e+01
   1.8829981e+01  -2.3085855e+01   1.5000000e+02   6.7539596e+00   5.2799185e-01   1.6608595e+01
   1.8761258e+01  -2.3197399e+01   1.5000000e+02   7.2918656e+00   3.1815458e-01   1.6034051e+01
   1.8696485e+01  -2.3310949e+01   1.5000000e+02   7.7474353e+00   6.8320224e-02   1.5444601e+01
   1.8635740e+01  -2.3426387e+01   1.5000000e+02   8.1160162e+00  -2.0902414e-01   1.4851857e+01
   1.8579096e+01  -2.3543589e+01   1.5000000e+02   8.3983924e+00  -5.0405884e-01   1.4266819e+01
   1.8526625e+01  -2.3662432e+01   1.5000000e+02   8.6009958e+00  -8.1049270e-01   1.3698773e+01
   1.8478394e+01  -2.3782787e+01   1.5000000e+02   8.7351859e+00  -1.1256700e+00   1.3154024e+01
   1.8434464e+01  -2.3904529e+01   1.5000000e+02   8.8156160e+00  -1.4500270e+00   1.2634659e+01
   1.8394896e+01  -2.4027524e+01   1.5000000e+02   8.8577414e+00  -1.7858472e+00   1.2137856e+01
   1.8359743e+01  -2.4151643e+01   1.5000000e+02   8.8749631e+00  -2.1356838e+00   1.1655822e+01
   1.8329057e+01  -2.4276751e+01   1.5000000e+02   8.8759957e+00  -2.5007665e+00   1.1176711e+01
   1.8302882e+01  -2.4402714e+01   1.5000000e+02   8.8630023e+00  -2.8798733e+00   1.0686318e+01
   1.8281261e+01  -2.4529395e+01   1.5000000e+02   8.8310192e+00  -3.2690482e+00   1.0170441e+01
   1.8264231e+01  -2.4656656e+01   1.5000000e+02   8.7688246e+00  -3.6621441e+00   9.6174414e+00
   1.8251824e+01  -2.4784360e+01   1.5000000e+02   8.6611917e+00  -4.0520193e+00   9.0204151e+00
   1.8244067e+01  -2.4912367e+01   1.5000000e+02   8.4918913e+00  -4.4318373e+00   8.3783623e+00
   1.8240985e+01  -2.5040537e+01   1.5000000e+02   8.2464593e+00  -4.7960799e+00   7.6960266e+00
   1.8242593e+01  -2.5168729e+01   1.5000000e+02   7.9138011e+00  -5.1408313e+00   6.9829346e+00
   1.8248907e+01  -2.5296802e+01   1.5000000e+02   7.4865400e+00  -5.4636408e+00   6.2524092e+00
   1.8259933e+01  -2.5424615e+01   1.5000000e+02   6.9607306e+00  -5.7628218e+00   5.5214302e+00
   1.8275674e+01  -2.5552025e+01   1.5000000e+02   6.3361347e+00  -6.0369060e+00   4.8110606e+00
   1.8296128e+01  -2.5678892e+01   1.5000000e+02   5.6175585e+00  -6.2843324e+00   4.1465680e+00
   1.8321288e+01  -2.5805073e+01   1.5000000e+02   4.8170054e+00  -6.5036305e+00   3.5562079e+00
   1.8351141e+01  -2.5930428e+01   1.5000000e+02   3.9553999e+00  -6.6940630e+00   3.0681031e+00
   1.8385667e+01  -2.6054815e+01   1.5000000e+02   3.0628109e+00  -6.8565157e+00   2.7057699e+00
   1.8424844e+01  -2.6178095e+01   1.5000000e+02   2.1764107e+00  -6.9943874e+00   2.4833003e+00
   1.8468642e+01  -2.6300127e+01   1.5000000e+02   1.3365149e+00  -7.1140342e+00   2.4015650e+00
   1.8517026e+01  -2.6420775e+01   1.5000000e+02   5.8137320e-01  -7.2246389e+00   2.4461720e+00
   1.8569957e+01  -2.6539900e+01   1.5000000e+02  -5.8054809e-02  -7.3372444e+00   2.5876069e+00
   1.8627387e+01  -2.6657366e+01   1.5000000e+02  -5.6255038e-01  -7.4628677e+00   2.7835940e+00
   1.8689266e+01  -2.6773038e+01   1.5000000e+02  -9.2751829e-01  -7.6101323e+00   2.9833025e+00
   1.8755537e+01  -2.6886784e+01   1.5000000e+02  -1.1639179e+00  -7.7827798e+00   3.1330606e+00
   1.8826136e+01  -2.6998473e+01   1.5000000e+02  -1.2971517e+00  -7.9778378e+00   3.1827572e+00
   1.8900996e+01  -2.7107974e+01   1.5000000e+02  -1.3641350e+00  -8.1849210e+00   3.0920935e+00
   1.8980042e+01  -2.7215161e+01   1.5000000e+02  -1.4089623e+00  -8.3868035e+00   2.8358974e+00
   1.9063196e+01  -2.7319909e+01   1.5000000e+02  -1.4778517e+00  -8.5614669e+00   2.4076527e+00
   1.9150371e+01  -2.7422096e+01   1.5000000e+02  -1.6139014e+00  -8.6853258e+00   1.8209323e+00
   1.9241478e+01  -2.7521601e+01   1.5000000e+02  -1.8522441e+00  -8.7374866e+00   1.1082105e+00
   1.9336421e+01  -2.7618308e+01   1.5000000e+02  -2.2159661e+00  -8.7041948e+00   3.1704443e-01
   1.9435097e+01  -2.7712102e+01   1.5000000e+02  -2.7133285e+00  -8.5827123e+00  -4.9636489e-01
   1.9537402e+01  -2.7802872e+01   1.5000000e+02  -3.3367484e+00  -8.3835284e+00  -1.2756738e+00
   1.9643223e+01  -2.7890511e+01   1.5000000e+02  -4.0638246e+00  -8.1300128e+00  -1.9737409e+00
   1.9752443e+01  -2.7974914e+01   1.5000000e+02  -4.8607097e+00  -7.8551106e+00  -2.5614659e+00
   1.9864941e+01  -2.8055980e+01   1.5000000e+02  -5.6875693e+00  -7.5950009e+00  -3.0340139e+00
   1.9980590e+01  -2.8133613e+01   1.5000000e+02  -6.5053456e+00  -7.3806614e+00  -3.4123517e+00
   2.0099259e+01  -2.8207718e+01   1.5000000e+02  -7.2823067e+00  -7.2292870e+00  -3.7387283e+00
   2.0220812e+01  -2.8278208e+01   1.5000000e+02  -7.9984334e+00  -7.1380841e+00  -4.0662656e+00
   2.0345108e+01  -2.8344997e+01   1.5000000e+02  -8.6460102e+00  -7.0829577e+00  -4.4452511e+00
   2.0472005e+01  -2.8408004e+01   1.5000000e+02  -9.2262329e+00  -7.0229538e+00  -4.9101858e+00
   2.0601352e+01  -2.8467152e+01   1.5000000e+02  -9.7431094e+00  -6.9094895e+00  -5.4717265e+00
   2.0732999e+01  -2.8522371e+01   1.5000000e+02  -1.0197265e+01  -6.6975333e+00  -6.1162009e+00
   2.0866788e+01  -2.8573592e+01   1.5000000e+02  -1.0581969e+01  -6.3549926e+00  -6.8123520e+00
   2.1002562e+01  -2.8620753e+01   1.5000000e+02  -1.0882929e+01  -5.8669776e+00  -7.5225090e+00
   2.1140158e+01  -2.8663798e+01   1.5000000e+02  -1.1081524e+01  -5.2335484e+00  -8.2134443e+00
   2.1279410e+01  -2.8702672e+01   1.5000000e+02  -1.1159962e+01  -4.4620266e+00  -8.8626941e+00
   2.1420151e+01  -2.8737329e+01   1.5000000e+02  -1.1106386e+01  -3.5572132e+00  -9.4576592e+00
   2.1562211e+01  -2.8767726e+01   1.5000000e+02  -1.0918246e+01  -2.5137253e+00  -9.9880489e+00
   2.1705417e+01  -2.8793825e+01   1.5000000e+02  -1.0603456e+01  -1.3140487e+00  -1.0434235e+01
   2.1849595e+01  -2.8815595e+01   1.5000000e+02  -1.0179513e+01   6.5557960e-02  -1.0755864e+01
   2.1994569e+01  -2.8833009e+01   1.5000000e+02  -9.6712292e+00   1.6414365e+00  -1.0885936e+01
   2.2140162e+01  -2.8846046e+01   1.5000000e+02  -9.1079180e+00   3.4045816e+00  -1.0735267e+01
   2.2286196e+01  -2.8854688e+01   1.5000000e+02  -8.5206740e+00   5.3053109e+00  -1.0209664e+01
   2.2432492e+01  -2.8858927e+01   1.5000000e+02  -7.9401292e+00   7.2488438e+00  -9.2364425e+00
   2.2578871e+01  -2.8858755e+01   1.5000000e+02  -7.3944041e+00   9.1070713e+00  -7.7908482e+00
   2.2725153e+01  -2.8854175e+01   1.5000000e+02  -6.9071891e+00   1.0743894e+01  -5.9106904e+00
   2.3482750e+01  -2.8890663e+01   1.5000000e+02  -5.0699011e+00   1.2849994e+01   6.3340615e+00
   2.3625094e+01  -2.8859884e+01   1.5000000e+02  -4.9717640e+00   1.2256087e+01   8.3017084e+00
   2.3766142e+01  -2.8824969e+01   1.5000000e+02  -4.9437473e+00   1.1471548e+01   9.9798748e+00
   2.3905735e+01  -2.8785956e+01   1.5000000e+02  -4.9654361e+00   1.0572410e+01   1.1359312e+01
   2.4043712e+01  -2.8742890e+01   1.5000000e+02  -5.0159196e+00   9.6246277e+00   1.2452735e+01
   2.4179920e+01  -2.8695823e+01   1.5000000e+02  -5.0766811e+00   8.6802126e+00   1.3288470e+01
   2.4314203e+01  -2.8644807e+01   1.5000000e+02  -5.1340148e+00   7.7755871e+00   1.3903447e+01
   2.4446412e+01  -2.8589902e+01   1.5000000e+02  -5.1801287e+00   6.9321952e+00   1.4336622e+01
   2.4576399e+01  -2.8531171e+01   1.5000000e+02  -5.2130509e+00   6.1595315e+00   1.4623788e+01
   2.4704021e+01  -2.8468680e+01   1.5000000e+02  -5.2355720e+00   5.4592799e+00   1.4794949e+01
   2.4829135e+01  -2.8402501e+01   1.5000000e+02  -5.2539608e+00   4.8291692e+00   1.4874068e+01
   2.4951607e+01  -2.8332709e+01   1.5000000e+02  -5.2769437e+00   4.2653027e+00   1.4880086e+01
   2.5071302e+01  -2.8259385e+01   1.5000000e+02  -5.3149856e+00   3.7630217e+00   1.4827671e+01
   2.5188091e+01  -2.8182611e+01   1.5000000e+02  -5.3793872e+00   3.3168366e+00   1.4726853e+01
   2.5301850e+01  -2.8102474e+01   1.5000000e+02  -5.4806006e+00   2.9205906e+00   1.4581799e+01
   2.5412458e+01  -2.8019064e+01   1.5000000e+02  -5.6256760e+00   2.5685876e+00   1.4389953e+01
   2.5519799e+01  -2.7932477e+01   1.5000000e+02  -5.8153942e+00   2.2575177e+00   1.4143106e+01
   2.5623761e+01  -2.7842807e+01   1.5000000e+02  -6.0425630e+00   1.9883193e+00   1.3831131e+01
   2.5724237e+01  -2.7750157e+01   1.5000000e+02  -6.2926235e+00   1.7665632e+00   1.3447554e+01
   2.5821125e+01  -2.7654630e+01   1.5000000e+02  -6.5472586e+00   1.6008154e+00   1.2994670e+01
   2.5914327e+01  -2.7556331e+01   1.5000000e+02  -6.7899404e+00   1.4992751e+00   1.2485787e+01
   2.6003751e+01  -2.7455370e+01   1.5000000e+02  -7.0116143e+00   1.4660137e+00   1.1943192e+01
   2.6089309e+01  -2.7351859e+01   1.5000000e+02  -7.2144808e+00   1.4983381e+00   1.1392138e+01
   2.6170918e+01  -2.7245912e+01   1.5000000e+02  -7.4121743e+00   1.5861730e+00   1.0852755e+01
   2.6248502e+01  -2.7137645e+01   1.5000000e+02  -7.6257466e+00   1.7136372e+00   1.0332643e+01
   2.6321987e+01  -2.7027176e+01   1.5000000e+02  -7.8762856e+00   1.8622447e+00   9.8230105e+00
   2.6391306e+01  -2.6914627e+01   1.5000000e+02  -8.1763846e+00   2.0146272e+00   9.3001600e+00
   2.6456397e+01  -2.6800120e+01   1.5000000e+02  -8.5236203e+00   2.1576960e+00   8.7322531e+00
   2.6517203e+01  -2.6683778e+01   1.5000000e+02  -8.8985683e+00   2.2842895e+00   8.0892449e+00
   2.6573672e+01  -2.6565729e+01   1.5000000e+02  -9.2682783e+00   2.3929222e+00   7.3525982e+00
   2.6625757e+01  -2.6446098e+01   1.5000000e+02  -9.5940693e+00   2.4858373e+00   6.5213952e+00
   2.6673417e+01  -2.6325015e+01   1.5000000e+02  -9.8407966e+00   2.5660563e+00   5.6131202e+00
   2.6716615e+01  -2.6202608e+01   1.5000000e+02  -9.9846167e+00   2.6345627e+00   4.6590121e+00
   2.6755319e+01  -2.6079009e+01   1.5000000e+02  -1.0016867e+01   2.6886375e+00   3.6960746e+00
   2.6789504e+01  -2.5954348e+01   1.5000000e+02  -9.9432722e+00   2.7219622e+00   2.7584392e+00
   2.6819147e+01  -2.5828758e+01   1.5000000e+02  -9.7791545e+00   2.7263891e+00   1.8711971e+00
   2.6844232e+01  -2.5702371e+01   1.5000000e+02  -9.5427791e+00   2.6947338e+00   1.0486343e+00
   2.6864748e+01  -2.5575320e+01   1.5000000e+02  -9.2498429e+00   2.6236355e+00   2.9727406e-01
   2.6880688e+01  -2.5447738e+01   1.5000000e+02  -8.9118177e+00   2.5156085e+00  -3.7835780e-01
   2.6892049e+01  -2.5319759e+01   1.5000000e+02  -8.5389480e+00   2.3797629e+00  -9.7096466e-01
   2.6898836e+01  -2.5191515e+01   1.5000000e+02  -8.1458210e+00   2.2311323e+00  -1.4702367e+00
   2.6901055e+01  -2.5063141e+01   1.5000000e+02  -7.7554724e+00   2.0889071e+00  -1.8679159e+00
   2.6898718e+01  -2.4934768e+01   1.5000000e+02  -7.3985305e+00   1.9740303e+00  -2.1655623e+00
   2.6891843e+01  -2.4806529e+01   1.5000000e+02  -7.1070118e+00   1.9064942e+00  -2.3803430e+00
   2.6880449e+01  -2.4678557e+01   1.5000000e+02  -6.9055201e+00   1.9024789e+00  -2.5455007e+00
   2.6864563e+01  -2.4550981e+01   1.5000000e+02  -6.8038288e+00   1.9715027e+00  -2.7052924e+00
   2.6844215e+01  -2.4423934e+01   1.5000000e+02  -6.7933963e+00   2.1138142e+00  -2.9067019e+00
   2.6819438e+01  -2.4297543e+01   1.5000000e+02  -6.8480389e+00   2.3186203e+00  -3.1909128e+00
   2.6790271e+01  -2.4171938e+01   1.5000000e+02  -6.9276405e+00   2.5638445e+00  -3.5862319e+00
   2.6756755e+01  -2.4047245e+01   1.5000000e+02  -6.9837639e+00   2.8180322e+00  -4.1030404e+00
   2.6718937e+01  -2.3923592e+01   1.5000000e+02  -6.9666123e+00   3.0444702e+00  -4.7309087e+00
   2.6676867e+01  -2.3801102e+01   1.5000000e+02  -6.8330665e+00   3.2069352e+00  -5.4384791e+00
   2.6630600e+01  -2.3679898e+01   1.5000000e+02  -6.5549839e+00   3.2757664e+00  -6.1769163e+00
   2.6580191e+01  -2.3560103e+01   1.5000000e+02  -6.1260603e+00   3.2326987e+00  -6.8875588e+00
   2.6525703e+01  -2.3441835e+01   1.5000000e+02  -5.5648145e+00   3.0730241e+00  -7.5130228e+00
   2.6467201e+01  -2.3325214e+01   1.5000000e+02  -4.9118273e+00   2.8042973e+00  -8.0091981e+00
   2.6404752e+01  -2.3210354e+01   1.5000000e+02  -4.2209645e+00   2.4420528e+00  -8.3544269e+00
   2.6338428e+01  -2.3097370e+01   1.5000000e+02  -3.5470831e+00   2.0041617e+00  -8.5524663e+00
   2.6268304e+01  -2.2986375e+01   1.5000000e+02  -2.9339878e+00   1.5059269e+00  -8.6283923e+00
   2.6194458e+01  -2.2877477e+01   1.5000000e+02  -2.4062985e+00   9.5756161e-01  -8.6191893e+00
   2.6116972e+01  -2.2770784e+01   1.5000000e+02  -1.9671233e+00   3.6452408e-01  -8.5625435e+00
   2.6035928e+01  -2.2666402e+01   1.5000000e+02  -1.6012945e+00  -2.7012070e-01  -8.4873580e+00
   2.5951415e+01  -2.2564433e+01   1.5000000e+02  -1.2825374e+00  -9.4269704e-01  -8.4083553e+00
   2.5863521e+01  -2.2464976e+01   1.5000000e+02  -9.8189959e-01  -1.6467414e+00  -8.3255456e+00
   2.5772340e+01  -2.2368131e+01   1.5000000e+02  -6.7498676e-01  -2.3723455e+00  -8.2275300e+00
   2.5677967e+01  -2.2273990e+01   1.5000000e+02  -3.4626505e-01  -3.1070474e+00  -8.0966177e+00
   2.5580500e+01  -2.2182646e+01   1.5000000e+02   9.8431346e-03  -3.8372323e+00  -7.9136956e+00
   2.5480038e+01  -2.2094189e+01   1.5000000e+02   3.9026099e-01  -4.5492027e+00  -7.6615858e+00
   2.5376684e+01  -2.2008704e+01   1.5000000e+02   7.8560139e-01  -5.2291991e+00  -7.3268510e+00
   2.5270544e+01  -2.1926274e+01   1.5000000e+02   1.1824528e+00  -5.8624515e+00  -6.9008110e+00
   2.5161723e+01  -2.1846979e+01   1.5000000e+02   1.5650255e+00  -6.4320427e+00  -6.3806883e+00
   2.5050331e+01  -2.1770896e+01   1.5000000e+02   1.9161609e+00  -6.9186194e+00  -5.7713986e+00
   2.4936480e+01  -2.1698100e+01   1.5000000e+02   2.2182074e+00  -7.3019225e+00  -5.0875822e+00
   2.4820282e+01  -2.1628659e+01   1.5000000e+02   2.4541140e+00  -7.5643723e+00  -4.3548200e+00
   2.4701851e+01  -2.1562642e+01   1.5000000e+02   2.6088909e+00  -7.6959603e+00  -3.6089155e+00
   2.4581305e+01  -2.1500112e+01   1.5000000e+02   2.6712333e+00  -7.6991199e+00  -2.8924174e+00
   2.4458761e+01  -2.1441130e+01   1.5000000e+02   2.6349397e+00  -7.5917577e+00  -2.2485901e+00
   2.4334339e+01  -2.1385751e+01   1.5000000e+02   2.4996241e+00  -7.4070594e+00  -1.7139702e+00
   2.4208160e+01  -2.1334030e+01   1.5000000e+02   2.2704803e+00  -7.1894613e+00  -1.3114341e+00
   2.4080347e+01  -2.1286017e+01   1.5000000e+02   1.9570285e+00  -6.9874855e+00  -1.0458781e+00
   2.3951023e+01  -2.1241756e+01   1.5000000e+02   1.5712449e+00  -6.8453747e+00  -9.0407998e-01
   2.3820312e+01  -2.1201292e+01   1.5000000e+02   1.1257629e+00  -6.7961628e+00  -8.5882827e-01
   2.3688341e+01  -2.1164662e+01   1.5000000e+02   6.3274848e-01  -6.8582225e+00  -8.7565141e-01
   2.3555235e+01  -2.1131903e+01   1.5000000e+02   1.0381031e-01  -7.0360110e+00  -9.1967494e-01
   2.3421124e+01  -2.1103045e+01   1.5000000e+02  -4.4934307e-01  -7.3238141e+00  -9.6020419e-01
   2.3286135e+01  -2.1078115e+01   1.5000000e+02  -1.0141291e+00  -7.7104599e+00  -9.7214337e-01
   2.3150396e+01  -2.1057139e+01   1.5000000e+02  -1.5767639e+00  -8.1829012e+00  -9.3487918e-01
   2.3014039e+01  -2.1040136e+01   1.5000000e+02  -2.1226973e+00  -8.7277532e+00  -8.3030258e-01
   2.2877192e+01  -2.1027122e+01   1.5000000e+02  -2.6376548e+00  -9.3312938e+00  -6.4139080e-01
   2.2739985e+01  -2.1018110e+01   1.5000000e+02  -3.1088941e+00  -9.9787620e+00  -3.5188490e-01
   2.2602551e+01  -2.1013108e+01   1.5000000e+02  -3.5263889e+00  -1.0653807e+01   5.3258348e-02
   2.2465019e+01  -2.1012121e+01   1.5000000e+02  -3.8836307e+00  -1.1338300e+01   5.8725297e-01
   2.2327520e+01  -2.1015150e+01   1.5000000e+02  -4.1777851e+00  -1.2012130e+01   1.2608765e+00
   2.2190185e+01  -2.1022193e+01   1.5000000e+02  -4.4091640e+00  -1.2652879e+01   2.0818242e+00
   2.2053146e+01  -2.1033242e+01   1.5000000e+02  -4.5801439e+00  -1.3235329e+01   3.0536915e+00
   2.1916531e+01  -2.1048287e+01   1.5000000e+02  -4.6939264e+00  -1.3731132e+01   4.1744838e+00
   2.1780472e+01  -2.1067314e+01   1.5000000e+02  -4.7536233e+00  -1.4109121e+01   5.4344573e+00
   2.1645099e+01  -2.1090304e+01   1.5000000e+02  -4.7619863e+00  -1.4336964e+01   6.8139107e+00
   2.1510540e+01  -2.1117235e+01   1.5000000e+02  -4.7217146e+00  -1.4384485e+01   8.2816574e+00
   2.1376925e+01  -2.1148081e+01   1.5000000e+02  -4.6360365e+00  -1.4228408e+01   9.7952147e+00
   2.1244380e+01  -2.1182813e+01   1.5000000e+02  -4.5091438e+00  -1.3857472e+01   1.1303729e+01
   2.1113034e+01  -2.1221398e+01   1.5000000e+02  -4.3461827e+00  -1.3276269e+01   1.2753422e+01
   2.0983013e+01  -2.1263798e+01   1.5000000e+02  -4.1527047e+00  -1.2506146e+01   1.4094703e+01
   2.0854442e+01  -2.1309973e+01   1.5000000e+02  -3.9337448e+00  -1.1582503e+01   1.5288714e+01
   2.0727444e+01  -2.1359879e+01   1.5000000e+02  -3.6928980e+00  -1.0549233e+01   1.6311386e+01
   2.0602144e+01  -2.1413467e+01   1.5000000e+02  -3.4318015e+00  -9.4521460e+00   1.7154036e+01
   2.0478663e+01  -2.1470685e+01   1.5000000e+02  -3.1502288e+00  -8.3332036e+00   1.7821083e+01
   2.0357120e+01  -2.1531480e+01   1.5000000e+02  -2.8467474e+00  -7.2268988e+00   1.8326137e+01
   2.0237635e+01  -2.1595791e+01   1.5000000e+02  -2.5196102e+00  -6.1589704e+00   1.8687929e+01
   2.0120326e+01  -2.1663558e+01   1.5000000e+02  -2.1674250e+00  -5.1468753e+00   1.8927131e+01
   2.0005307e+01  -2.1734714e+01   1.5000000e+02  -1.7893817e+00  -4.2014095e+00   1.9064180e+01
   1.9892693e+01  -2.1809191e+01   1.5000000e+02  -1.3849680e+00  -3.3287329e+00   1.9118108e+01
   1.9782595e+01  -2.1886917e+01   1.5000000e+02  -9.5337027e-01  -2.5321587e+00   1.9105907e+01
   1.9675124e+01  -2.1967816e+01   1.5000000e+02  -4.9293189e-01  -1.8134931e+00   1.9042071e+01
   1.9570388e+01  -2.2051811e+01   1.5000000e+02  -1.0220218e-03  -1.1737803e+00   1.8938015e+01
   1.9468492e+01  -2.2138818e+01   1.5000000e+02   5.2534885e-01  -6.1372509e-01   1.8801396e+01
   1.9369541e+01  -2.2228755e+01   1.5000000e+02   1.0882755e+00  -1.3394222e-01   1.8635802e+01
   1.9273635e+01  -2.2321533e+01   1.5000000e+02   1.6873727e+00   2.6487895e-01   1.8441054e+01
   1.9180874e+01  -2.2417061e+01   1.5000000e+02   2.3185737e+00   5.8202637e-01   1.8214453e+01
   1.9091353e+01  -2.2515247e+01   1.5000000e+02   2.9737804e+00   8.1721852e-01   1.7952473e+01
   1.9005168e+01  -2.2615993e+01   1.5000000e+02   3.6413937e+00   9.7139195e-01   1.7652360e+01
   1.8922409e+01  -2.2719203e+01   1.5000000e+02   4.3075286e+00   1.0476274e+00   1.7313074e+01
   1.8843164e+01  -2.2824773e+01   1.5000000e+02   4.9572230e+00   1.0517699e+00   1.6935516e+01
   1.8767518e+01  -2.2932601e+01   1.5000000e+02   5.5755653e+00   9.9246564e-01   1.6522264e+01
   1.8695556e+01  -2.3042579e+01   1.5000000e+02   6.1484452e+00   8.8051164e-01   1.6077228e+01
   1.8627356e+01  -2.3154600e+01   1.5000000e+02   6.6632771e+00   7.2765108e-01   1.5605441e+01
   1.8562994e+01  -2.3268552e+01   1.5000000e+02   7.1097502e+00   5.4511399e-01   1.5113155e+01
   1.8502543e+01  -2.3384322e+01   1.5000000e+02   7.4808252e+00   3.4222792e-01   1.4607955e+01
   1.8446075e+01  -2.3501796e+01   1.5000000e+02   7.7737919e+00   1.2541799e-01   1.4098610e+01
   1.8393654e+01  -2.3620856e+01   1.5000000e+02   7.9910444e+00  -1.0214460e-01   1.3594412e+01
   1.8345344e+01  -2.3741382e+01   1.5000000e+02   8.1402611e+00  -3.4026414e-01   1.3103942e+01
   1.8301205e+01  -2.3863256e+01   1.5000000e+02   8.2335739e+00  -5.9080659e-01   1.2633425e+01
   1.8261291e+01  -2.3986353e+01   1.5000000e+02   8.2857112e+00  -8.5633677e-01   1.2185151e+01
   1.8225656e+01  -2.4110551e+01   1.5000000e+02   8.3114618e+00  -1.1387817e+00   1.1756285e+01
   1.8194347e+01  -2.4235723e+01   1.5000000e+02   8.3227619e+00  -1.4382331e+00   1.1338569e+01
   1.8167407e+01  -2.4361744e+01   1.5000000e+02   8.3261043e+00  -1.7524541e+00   1.0919105e+01
   1.8144879e+01  -2.4488485e+01   1.5000000e+02   8.3208168e+00  -2.0771235e+00   1.0482386e+01
   1.8126796e+01  -2.4615817e+01   1.5000000e+02   8.2987450e+00  -2.4067105e+00   1.0013228e+01
   1.8113192e+01  -2.4743611e+01   1.5000000e+02   8.2457274e+00  -2.7358095e+00   9.4999545e+00
   1.8104094e+01  -2.4871735e+01   1.5000000e+02   8.1444245e+00  -3.0601783e+00   8.9368379e+00
   1.8099525e+01  -2.5000059e+01   1.5000000e+02   7.9776458e+00  -3.3773384e+00   8.3250076e+00
   1.8099504e+01  -2.5128449e+01   1.5000000e+02   7.7309452e+00  -3.6864381e+00   7.6719164e+00
   1.8104045e+01  -2.5256773e+01   1.5000000e+02   7.3938120e+00  -3.9875752e+00   6.9900868e+00
   1.8113158e+01  -2.5384899e+01   1.5000000e+02   6.9597862e+00  -4.2808377e+00   6.2962097e+00
   1.8126848e+01  -2.5512693e+01   1.5000000e+02   6.4264876e+00  -4.5654095e+00   5.6109280e+00
   1.8145116e+01  -2.5640021e+01   1.5000000e+02   5.7964154e+00  -4.8391017e+00   4.9587447e+00
   1.8167958e+01  -2.5766751e+01   1.5000000e+02   5.0785943e+00  -5.0984416e+00   4.3671229e+00
   1.8195363e+01  -2.5892749e+01   1.5000000e+02   4.2903421e+00  -5.3393105e+00   3.8641247e+00
   1.8227318e+01  -2.6017883e+01   1.5000000e+02   3.4579471e+00  -5.5580085e+00   3.4745970e+00
   1.8263805e+01  -2.6142020e+01   1.5000000e+02   2.6154985e+00  -5.7523256e+00   3.2158610e+00
   1.8304799e+01  -2.6265030e+01   1.5000000e+02   1.8016913e+00  -5.9224694e+00   3.0939714e+00
   1.8350270e+01  -2.6386779e+01   1.5000000e+02   1.0553184e+00  -6.0716978e+00   3.1014440e+00
   1.8400186e+01  -2.6507140e+01   1.5000000e+02   4.1023762e-01  -6.2064052e+00   3.2168346e+00
   1.8454507e+01  -2.6625982e+01   1.5000000e+02  -1.0901461e-01  -6.3354660e+00   3.4061023e+00
   1.8513188e+01  -2.6743179e+01   1.5000000e+02  -4.9059292e-01  -6.4688166e+00   3.6254838e+00
   1.8576181e+01  -2.6858603e+01   1.5000000e+02  -7.3714773e-01  -6.6153960e+00   3.8255929e+00
   1.8643430e+01  -2.6972130e+01   1.5000000e+02  -8.6595378e-01  -6.7807585e+00   3.9565631e+00
   1.8714876e+01  -2.7083636e+01   1.5000000e+02  -9.0727180e-01  -6.9650820e+00   3.9735965e+00
   1.8790455e+01  -2.7192999e+01   1.5000000e+02  -9.0111277e-01  -7.1619142e+00   3.8423260e+00
   1.8870096e+01  -2.7300101e+01   1.5000000e+02  -8.9287877e-01  -7.3580517e+00   3.5431970e+00
   1.8953724e+01  -2.7404824e+01   1.5000000e+02  -9.2855561e-01  -7.5348033e+00   3.0743291e+00
   1.9041259e+01  -2.7507052e+01   1.5000000e+02  -1.0499409e+00  -7.6706055e+00   2.4526052e+00
   1.9132616e+01  -2.7606672e+01   1.5000000e+02  -1.2902793e+00  -7.7448656e+00   1.7126676e+00
   1.9227705e+01  -2.7703575e+01   1.5000000e+02  -1.6705978e+00  -7.7424547e+00   9.0354897e-01
   1.9326430e+01  -2.7797652e+01   1.5000000e+02  -2.1971213e+00  -7.6579462e+00   8.2871157e-02
   1.9428692e+01  -2.7888798e+01   1.5000000e+02  -2.8602756e+00  -7.4984848e+00  -6.9110491e-01
   1.9534387e+01  -2.7976912e+01   1.5000000e+02  -3.6357218e+00  -7.2843459e+00  -1.3685910e+00
   1.9643403e+01  -2.8061895e+01   1.5000000e+02  -4.4876740e+00  -7.0465830e+00  -1.9171310e+00
   1.9755629e+01  -2.8143652e+01   1.5000000e+02  -5.3744455e+00  -6.8216123e+00  -2.3283674e+00
   1.9870945e+01  -2.8222089e+01   1.5000000e+02  -6.2552487e+00  -6.6433395e+00  -2.6204626e+00
   1.9989228e+01  -2.8297119e+01   1.5000000e+02  -7.0969792e+00  -6.5345020e+00  -2.8347583e+00
   2.0110352e+01  -2.8368657e+01   1.5000000e+02  -7.8788163e+00  -6.4997705e+00  -3.0265465e+00
   2.0234185e+01  -2.8436620e+01   1.5000000e+02  -8.5930808e+00  -6.5229623e+00  -3.2520752e+00
   2.0360592e+01  -2.8500932e+01   1.5000000e+02  -9.2420201e+00  -6.5696648e+00  -3.5555741e+00
   2.0489434e+01  -2.8561520e+01   1.5000000e+02  -9.8317076e+00  -6.5947178e+00  -3.9603077e+00
   2.0620570e+01  -2.8618313e+01   1.5000000e+02  -1.0365539e+01  -6.5522467e+00  -4.4661761e+00
   2.0753853e+01  -2.8671247e+01   1.5000000e+02  -1.0839735e+01  -6.4050901e+00  -5.0539940e+00
   2.0889134e+01  -2.8720262e+01   1.5000000e+02  -1.1242265e+01  -6.1306310e+00  -5.6946050e+00
   2.1026261e+01  -2.8765300e+01   1.5000000e+02  -1.1555133e+01  -5.7210581e+00  -6.3590704e+00
   2.1165080e+01  -2.8806309e+01   1.5000000e+02  -1.1758794e+01  -5.1781329e+00  -7.0259829e+00
   2.1305433e+01  -2.8843244e+01   1.5000000e+02  -1.1836836e+01  -4.5046401e+00  -7.6831649e+00
   2.1447160e+01  -2.8876060e+01   1.5000000e+02  -1.1779441e+01  -3.6958854e+00  -8.3231830e+00
   2.1590100e+01  -2.8904720e+01   1.5000000e+02  -1.1585089e+01  -2.7347857e+00  -8.9337484e+00
   2.1734090e+01  -2.8929190e+01   1.5000000e+02  -1.1260466e+01  -1.5932998e+00  -9.4861867e+00
   2.1878962e+01  -2.8949443e+01   1.5000000e+02  -1.0819194e+01  -2.4157947e-01  -9.9258553e+00
   2.2024552e+01  -2.8965454e+01   1.5000000e+02  -1.0279964e+01   1.3363500e+00  -1.0169608e+01
   2.2170691e+01  -2.8977206e+01   1.5000000e+02  -9.6650927e+00   3.1243030e+00  -1.0114242e+01
   2.2317210e+01  -2.8984684e+01   1.5000000e+02  -8.9998030e+00   5.0607508e+00  -9.6572148e+00
   2.2463940e+01  -2.8987880e+01   1.5000000e+02  -8.3121497e+00   7.0381291e+00  -8.7246284e+00
   2.2610713e+01  -2.8986789e+01   1.5000000e+02  -7.6324163e+00   8.9183239e+00  -7.2965742e+00
   2.2757357e+01  -2.8981415e+01   1.5000000e+02  -6.9911717e+00   1.0560189e+01  -5.4189844e+00
   2.2903704e+01  -2.8971761e+01   1.5000000e+02  -6.4159376e+00   1.1849119e+01  -3.1964894e+00
   2.3049584e+01  -2.8957841e+01   1.5000000e+02  -5.9279119e+00   1.2717166e+01  -7.7000291e-01
   2.3194830e+01  -2.8939670e+01   1.5000000e+02  -5.5398039e+00   1.3148678e+01   1.7113860e+00
   2.3339274e+01  -2.8917268e+01   1.5000000e+02  -5.2553423e+00   1.3172921e+01   4.1140627e+00
   2.4096253e+01  -2.8862791e+01   1.5000000e+02  -4.1267166e+00   8.9697064e+00   1.2929028e+01
   2.4232789e+01  -2.8815636e+01   1.5000000e+02  -4.1535563e+00   7.9854744e+00   1.3732215e+01
   2.4367451e+01  -2.8764641e+01   1.5000000e+02  -4.1847224e+00   7.0408726e+00   1.4312508e+01
   2.4500096e+01  -2.8709861e+01   1.5000000e+02  -4.2119809e+00   6.1592762e+00   1.4707004e+01
   2.4630585e+01  -2.8651355e+01   1.5000000e+02  -4.2331322e+00   5.3526405e+00   1.4950752e+01
   2.4758781e+01  -2.8589188e+01   1.5000000e+02  -4.2505002e+00   4.6251581e+00   1.5074263e+01
   2.4884551e+01  -2.8523425e+01   1.5000000e+02  -4.2692993e+00   3.9766696e+00   1.5103300e+01
   2.5007765e+01  -2.8454138e+01   1.5000000e+02  -4.2964433e+00   3.4047424e+00   1.5059892e+01
   2.5128297e+01  -2.8381402e+01   1.5000000e+02  -4.3401075e+00   2.9052891e+00   1.4963030e+01
   2.5246025e+01  -2.8305293e+01   1.5000000e+02  -4.4095283e+00   2.4723618e+00   1.4828062e+01
   2.5360828e+01  -2.8225895e+01   1.5000000e+02  -4.5142300e+00   2.0981411e+00   1.4664778e+01
   2.5472593e+01  -2.8143290e+01   1.5000000e+02  -4.6622027e+00   1.7740123e+00   1.4475297e+01
   2.5581209e+01  -2.8057568e+01   1.5000000e+02  -4.8570449e+00   1.4928651e+00   1.4253549e+01
   2.5686569e+01  -2.7968819e+01   1.5000000e+02  -5.0953478e+00   1.2517716e+00   1.3987721e+01
   2.5788570e+01  -2.7877136e+01   1.5000000e+02  -5.3657557e+00   1.0535009e+00   1.3665582e+01
   2.5887114e+01  -2.7782618e+01   1.5000000e+02  -5.6508276e+00   9.0574299e-01   1.3280799e+01
   2.5982109e+01  -2.7685362e+01   1.5000000e+02  -5.9315992e+00   8.1809826e-01   1.2837502e+01
   2.6073464e+01  -2.7585471e+01   1.5000000e+02  -6.1933456e+00   7.9797951e-01   1.2351075e+01
   2.6161095e+01  -2.7483050e+01   1.5000000e+02  -6.4307440e+00   8.4707869e-01   1.1844574e+01
   2.6244923e+01  -2.7378205e+01   1.5000000e+02  -6.6505862e+00   9.5964590e-01   1.1341847e+01
   2.6324871e+01  -2.7271044e+01   1.5000000e+02  -6.8707864e+00   1.1229423e+00   1.0859478e+01
   2.6400870e+01  -2.7161679e+01   1.5000000e+02  -7.1153442e+00   1.3195306e+00   1.0400125e+01
   2.6472853e+01  -2.7050223e+01   1.5000000e+02  -7.4063563e+00   1.5307198e+00   9.9497169e+00
   2.6540758e+01  -2.6936789e+01   1.5000000e+02  -7.7553822e+00   1.7401191e+00   9.4800105e+00
   2.6604530e+01  -2.6821495e+01   1.5000000e+02  -8.1572909e+00   1.9363614e+00   8.9562391e+00
   2.6664117e+01  -2.6704458e+01   1.5000000e+02  -8.5891870e+00   2.1142802e+00   8.3474607e+00
   2.6719472e+01  -2.6585797e+01   1.5000000e+02  -9.0149799e+00   2.2741179e+00   7.6361492e+00
   2.6770551e+01  -2.6465632e+01   1.5000000e+02  -9.3941083e+00   2.4190781e+00   6.8235979e+00
   2.6817318e+01  -2.6344085e+01   1.5000000e+02  -9.6912507e+00   2.5521051e+00   5.9294327e+00
   2.6859740e+01  -2.6221278e+01   1.5000000e+02  -9.8837802e+00   2.6731590e+00   4.9857289e+00
   2.6897788e+01  -2.6097334e+01   1.5000000e+02  -9.9647812e+00   2.7780074e+00   4.0282193e+00
   2.6931439e+01  -2.5972378e+01   1.5000000e+02  -9.9412050e+00   2.8589158e+00   3.0877602e+00
   2.6960673e+01  -2.5846533e+01   1.5000000e+02  -9.8282555e+00   2.9068408e+00   2.1848840e+00
   2.6985477e+01  -2.5719925e+01   1.5000000e+02  -9.6423167e+00   2.9142736e+00   1.3293364e+00
   2.7005839e+01  -2.5592680e+01   1.5000000e+02  -9.3954484e+00   2.8777899e+00   5.2439174e-01
   2.7021754e+01  -2.5464922e+01   1.5000000e+02  -9.0940967e+00   2.7996507e+00  -2.2620840e-01
   2.7033221e+01  -2.5336777e+01   1.5000000e+02  -8.7427999e+00   2.6881928e+00  -9.1263312e-01
   2.7040243e+01  -2.5208372e+01   1.5000000e+02  -8.3507619e+00   2.5571870e+00  -1.5183635e+00
   2.7042827e+01  -2.5079831e+01   1.5000000e+02  -7.9371289e+00   2.4245111e+00  -2.0255958e+00
   2.7040984e+01  -2.4951279e+01   1.5000000e+02  -7.5313118e+00   2.3104081e+00  -2.4239648e+00
   2.7034731e+01  -2.4822841e+01   1.5000000e+02  -7.1675765e+00   2.2353302e+00  -2.7179453e+00
   2.7024088e+01  -2.4694643e+01   1.5000000e+02  -6.8765199e+00   2.2172602e+00  -2.9291655e+00
   2.7009076e+01  -2.4566806e+01   1.5000000e+02  -6.6773395e+00   2.2686143e+00  -3.0930934e+00
   2.6989726e+01  -2.4439455e+01   1.5000000e+02  -6.5735326e+00   2.3931735e+00  -3.2522938e+00
   2.6966067e+01  -2.4312712e+01   1.5000000e+02  -6.5522243e+00   2.5836812e+00  -3.4490186e+00
   2.6938135e+01  -2.4186697e+01   1.5000000e+02  -6.5859794e+00   2.8210521e+00  -3.7187612e+00
   2.6905970e+01  -2.4061531e+01   1.5000000e+02  -6.6360864e+00   3.0757232e+00  -4.0848823e+00
   2.6869613e+01  -2.3937333e+01   1.5000000e+02  -6.6572195e+00   3.3113846e+00  -4.5542199e+00
   2.6829112e+01  -2.3814220e+01   1.5000000e+02  -6.6038505e+00   3.4906122e+00  -5.1141700e+00
   2.6784515e+01  -2.3692310e+01   1.5000000e+02  -6.4383958e+00   3.5811929e+00  -5.7325454e+00
   2.6735876e+01  -2.3571717e+01   1.5000000e+02  -6.1397549e+00   3.5616548e+00  -6.3616853e+00
   2.6683251e+01  -2.3452554e+01   1.5000000e+02  -5.7097870e+00   3.4243298e+00  -6.9472329e+00
   2.6626700e+01  -2.3334934e+01   1.5000000e+02  -5.1748092e+00   3.1750270e+00  -7.4401227e+00
   2.6566286e+01  -2.3218967e+01   1.5000000e+02  -4.5804419e+00   2.8293326e+00  -7.8083113e+00
   2.6502074e+01  -2.3104761e+01   1.5000000e+02  -3.9807280e+00   2.4067997e+00  -8.0440195e+00
   2.6434133e+01  -2.2992422e+01   1.5000000e+02  -3.4249284e+00   1.9250891e+00  -8.1637417e+00
   2.6362536e+01  -2.2882056e+01   1.5000000e+02  -2.9462915e+00   1.3960503e+00  -8.2011712e+00
   2.6287357e+01  -2.2773764e+01   1.5000000e+02  -2.5560257e+00   8.2482057e-01  -8.1958032e+00
   2.6208673e+01  -2.2667647e+01   1.5000000e+02  -2.2437436e+00   2.1186726e-01  -8.1812056e+00
   2.6126565e+01  -2.2563803e+01   1.5000000e+02  -1.9834187e+00  -4.4331007e-01  -8.1765819e+00
   2.6041115e+01  -2.2462328e+01   1.5000000e+02  -1.7424440e+00  -1.1385061e+00  -8.1837637e+00
   2.5952409e+01  -2.2363316e+01   1.5000000e+02  -1.4907307e+00  -1.8666524e+00  -8.1896366e+00
   2.5860534e+01  -2.2266857e+01   1.5000000e+02  -1.2071676e+00  -2.6158710e+00  -8.1721334e+00
   2.5765580e+01  -2.2173041e+01   1.5000000e+02  -8.8221443e-01  -3.3712446e+00  -8.1069680e+00
   2.5667641e+01  -2.2081952e+01   1.5000000e+02  -5.1699467e-01  -4.1172072e+00  -7.9727244e+00
   2.5566809e+01  -2.1993676e+01   1.5000000e+02  -1.2029195e-01  -4.8391660e+00  -7.7532704e+00
   2.5463183e+01  -2.1908291e+01   1.5000000e+02   2.9471851e-01  -5.5236990e+00  -7.4379799e+00
   2.5356861e+01  -2.1825877e+01   1.5000000e+02   7.1300044e-01  -6.1572965e+00  -7.0210689e+00
   2.5247944e+01  -2.1746508e+01   1.5000000e+02   1.1188559e+00  -6.7246015e+00  -6.5014989e+00
   2.5136533e+01  -2.1670257e+01   1.5000000e+02   1.4962055e+00  -7.2073001e+00  -5.8841788e+00
   2.5022735e+01  -2.1597193e+01   1.5000000e+02   1.8285356e+00  -7.5848881e+00  -5.1822500e+00
   2.4906654e+01  -2.1527383e+01   1.5000000e+02   2.0992700e+00  -7.8377693e+00  -4.4192143e+00
   2.4788398e+01  -2.1460889e+01   1.5000000e+02   2.2927625e+00  -7.9521939e+00  -3.6295410e+00
   2.4668077e+01  -2.1397772e+01   1.5000000e+02   2.3959280e+00  -7.9256754e+00  -2.8565523e+00
   2.4545802e+01  -2.1338090e+01   1.5000000e+02   2.4000272e+00  -7.7711379e+00  -2.1473172e+00
   2.4421685e+01  -2.1281896e+01   1.5000000e+02   2.3020322e+00  -7.5181231e+00  -1.5453331e+00
   2.4295839e+01  -2.1229241e+01   1.5000000e+02   2.1050775e+00  -7.2100989e+00  -1.0827371e+00
   2.4168379e+01  -2.1180172e+01   1.5000000e+02   1.8177411e+00  -6.8980714e+00  -7.7429686e-01
   2.4039421e+01  -2.1134735e+01   1.5000000e+02   1.4523539e+00  -6.6320719e+00  -6.1524139e-01
   2.3909081e+01  -2.1092970e+01   1.5000000e+02   1.0228966e+00  -6.4530880e+00  -5.8369634e-01
   2.3777478e+01  -2.1054914e+01   1.5000000e+02   5.4331147e-01  -6.3879912e+00  -6.4675053e-01
   2.3644730e+01  -2.1020603e+01   1.5000000e+02   2.6729474e-02  -6.4487166e+00  -7.6767854e-01
   2.3510958e+01  -2.0990066e+01   1.5000000e+02  -5.1435522e-01  -6.6350996e+00  -9.1166306e-01
   2.3376280e+01  -2.0963332e+01   1.5000000e+02  -1.0674218e+00  -6.9394833e+00  -1.0485047e+00
   2.3240818e+01  -2.0940424e+01   1.5000000e+02  -1.6194139e+00  -7.3507458e+00  -1.1524150e+00
   2.3104694e+01  -2.0921363e+01   1.5000000e+02  -2.1567898e+00  -7.8565174e+00  -1.2003513e+00
   2.2968029e+01  -2.0906167e+01   1.5000000e+02  -2.6661655e+00  -8.4434736e+00  -1.1705096e+00
   2.2830946e+01  -2.0894848e+01   1.5000000e+02  -3.1353176e+00  -9.0965900e+00  -1.0419249e+00
   2.2693567e+01  -2.0887418e+01   1.5000000e+02  -3.5542778e+00  -9.7984691e+00  -7.9509635e-01
   2.2556015e+01  -2.0883882e+01   1.5000000e+02  -3.9162703e+00  -1.0529149e+01  -4.1311178e-01
   2.2418413e+01  -2.0884244e+01   1.5000000e+02  -4.2181731e+00  -1.1266465e+01   1.1741060e-01
   2.2280884e+01  -2.0888504e+01   1.5000000e+02  -4.4603003e+00  -1.1986503e+01   8.0572100e-01
   2.2143550e+01  -2.0896658e+01   1.5000000e+02  -4.6454364e+00  -1.2663805e+01   1.6566122e+00
   2.2006536e+01  -2.0908698e+01   1.5000000e+02  -4.7774032e+00  -1.3271123e+01   2.6699389e+00
   2.1869962e+01  -2.0924614e+01   1.5000000e+02  -4.8597085e+00  -1.3779075e+01   3.8396352e+00
   2.1733952e+01  -2.0944391e+01   1.5000000e+02  -4.8947686e+00  -1.4156232e+01   5.1517887e+00
   2.1598626e+01  -2.0968012e+01   1.5000000e+02  -4.8839709e+00  -1.4370716e+01   6.5824681e+00
   2.1464108e+01  -2.0995455e+01   1.5000000e+02  -4.8284117e+00  -1.4393653e+01   8.0960570e+00
   2.1330516e+01  -2.1026695e+01   1.5000000e+02  -4.7298897e+00  -1.4204218e+01   9.6458088e+00
   2.1197972e+01  -2.1061705e+01   1.5000000e+02  -4.5916752e+00  -1.3794854e+01   1.1177148e+01
   2.1066595e+01  -2.1100453e+01   1.5000000e+02  -4.4186905e+00  -1.3174796e+01   1.2633931e+01
   2.0936503e+01  -2.1142903e+01   1.5000000e+02  -4.2169674e+00  -1.2370270e+01   1.3965980e+01
   2.0807815e+01  -2.1189019e+01   1.5000000e+02  -3.9925238e+00  -1.1420948e+01   1.5135722e+01
   2.0680646e+01  -2.1238757e+01   1.5000000e+02  -3.7500698e+00  -1.0373649e+01   1.6121901e+01
   2.0555112e+01  -2.1292074e+01   1.5000000e+02  -3.4920612e+00  -9.2753907e+00   1.6919529e+01
   2.0431329e+01  -2.1348920e+01   1.5000000e+02  -3.2185154e+00  -8.1676868e+00   1.7536785e+01
   2.0309409e+01  -2.1409245e+01   1.5000000e+02  -2.9276212e+00  -7.0831758e+00   1.7990468e+01
   2.0189464e+01  -2.1472994e+01   1.5000000e+02  -2.6168889e+00  -6.0448224e+00   1.8301479e+01
   2.0071604e+01  -2.1540108e+01   1.5000000e+02  -2.2842967e+00  -5.0669664e+00   1.8491473e+01
   1.9955939e+01  -2.1610529e+01   1.5000000e+02  -1.9289933e+00  -4.1574382e+00   1.8580984e+01
   1.9842576e+01  -2.1684190e+01   1.5000000e+02  -1.5513418e+00  -3.3198813e+00   1.8588769e+01
   1.9731622e+01  -2.1761026e+01   1.5000000e+02  -1.1523215e+00  -2.5556624e+00   1.8531939e+01
   1.9623179e+01  -2.1840966e+01   1.5000000e+02  -7.3261743e-01  -1.8650513e+00   1.8426119e+01
   1.9517350e+01  -2.1923938e+01   1.5000000e+02  -2.9181994e-01  -1.2477381e+00   1.8285248e+01
   1.9414236e+01  -2.2009866e+01   1.5000000e+02   1.7182053e-01  -7.0292512e-01   1.8120804e+01
   1.9313935e+01  -2.2098672e+01   1.5000000e+02   6.6082720e-01  -2.2940412e-01   1.7940780e+01
   1.9216543e+01  -2.2190274e+01   1.5000000e+02   1.1772183e+00   1.7417256e-01   1.7749056e+01
   1.9122155e+01  -2.2284588e+01   1.5000000e+02   1.7210589e+00   5.0896900e-01   1.7545674e+01
   1.9030862e+01  -2.2381528e+01   1.5000000e+02   2.2894743e+00   7.7588754e-01   1.7327993e+01
   1.8942755e+01  -2.2481005e+01   1.5000000e+02   2.8764801e+00   9.7595308e-01   1.7092278e+01
   1.8857919e+01  -2.2582927e+01   1.5000000e+02   3.4735664e+00   1.1111298e+00   1.6834962e+01
   1.8776441e+01  -2.2687201e+01   1.5000000e+02   4.0705754e+00   1.1851871e+00   1.6553288e+01
   1.8698403e+01  -2.2793729e+01   1.5000000e+02   4.6564192e+00   1.2041972e+00   1.6245263e+01
   1.8623884e+01  -2.2902414e+01   1.5000000e+02   5.2195319e+00   1.1763627e+00   1.5909459e+01
   1.8552961e+01  -2.3013155e+01   1.5000000e+02   5.7480879e+00   1.1111744e+00   1.5545031e+01
   1.8485708e+01  -2.3125849e+01   1.5000000e+02   6.2303643e+00   1.0181337e+00   1.5152151e+01
   1.8422197e+01  -2.3240390e+01   1.5000000e+02   6.6554507e+00   9.0538443e-01   1.4732790e+01
   1.8362495e+01  -2.3356673e+01   1.5000000e+02   7.0144375e+00   7.7861030e-01   1.4291495e+01
   1.8306669e+01  -2.3474588e+01   1.5000000e+02   7.3018948e+00   6.4050147e-01   1.3835779e+01
   1.8254781e+01  -2.3594025e+01   1.5000000e+02   7.5173047e+00   4.9093347e-01   1.3375630e+01
   1.8206889e+01  -2.3714872e+01   1.5000000e+02   7.6658517e+00   3.2781304e-01   1.2922085e+01
   1.8163049e+01  -2.3837014e+01   1.5000000e+02   7.7581697e+00   1.4833434e-01   1.2485061e+01
   1.8123314e+01  -2.3960337e+01   1.5000000e+02   7.8088842e+00  -4.9694923e-02   1.2070900e+01
   1.8087733e+01  -2.4084724e+01   1.5000000e+02   7.8340919e+00  -2.6676504e-01   1.1680294e+01
   1.8056352e+01  -2.4210057e+01   1.5000000e+02   7.8482053e+00  -5.0114194e-01   1.1307136e+01
   1.8029211e+01  -2.4336217e+01   1.5000000e+02   7.8607029e+00  -7.4902400e-01   1.0938811e+01
   1.8006351e+01  -2.4463082e+01   1.5000000e+02   7.8735817e+00  -1.0054477e+00   1.0558216e+01
   1.7987804e+01  -2.4590533e+01   1.5000000e+02   7.8802621e+00  -1.2655538e+00   1.0147201e+01
   1.7973603e+01  -2.4718446e+01   1.5000000e+02   7.8666025e+00  -1.5259168e+00   9.6907010e+00
   1.7963774e+01  -2.4846698e+01   1.5000000e+02   7.8137953e+00  -1.7853044e+00   9.1801156e+00
   1.7958339e+01  -2.4975166e+01   1.5000000e+02   7.7022252e+00  -2.0447229e+00   8.6149447e+00
   1.7957318e+01  -2.5103725e+01   1.5000000e+02   7.5148498e+00  -2.3067194e+00   8.0024179e+00
   1.7960726e+01  -2.5232251e+01   1.5000000e+02   7.2390903e+00  -2.5741708e+00   7.3558896e+00
   1.7968574e+01  -2.5360618e+01   1.5000000e+02   6.8672819e+00  -2.8489717e+00   6.6932242e+00
   1.7980868e+01  -2.5488700e+01   1.5000000e+02   6.3965358e+00  -3.1309656e+00   6.0358181e+00
   1.7997609e+01  -2.5616372e+01   1.5000000e+02   5.8290178e+00  -3.4174318e+00   5.4080917e+00
   1.8018797e+01  -2.5743509e+01   1.5000000e+02   5.1730434e+00  -3.7033030e+00   4.8366507e+00
   1.8044425e+01  -2.5869984e+01   1.5000000e+02   4.4445326e+00  -3.9819108e+00   4.3483662e+00
   1.8074481e+01  -2.5995673e+01   1.5000000e+02   3.6678076e+00  -4.2461755e+00   3.9671647e+00
   1.8108951e+01  -2.6120450e+01   1.5000000e+02   2.8748833e+00  -4.4898496e+00   3.7101807e+00
   1.8147814e+01  -2.6244192e+01   1.5000000e+02   2.1027964e+00  -4.7085384e+00   3.5842769e+00
   1.8191046e+01  -2.6366774e+01   1.5000000e+02   1.3894972e+00  -4.9005632e+00   3.5839056e+00
   1.8238617e+01  -2.6488074e+01   1.5000000e+02   7.6910101e-01  -5.0674853e+00   3.6907659e+00
   1.8290494e+01  -2.6607968e+01   1.5000000e+02   2.6757116e-01  -5.2143013e+00   3.8750980e+00
   1.8346639e+01  -2.6726337e+01   1.5000000e+02  -1.0059552e-01  -5.3489947e+00   4.0982238e+00
   1.8407007e+01  -2.6843059e+01   1.5000000e+02  -3.3427529e-01  -5.4813508e+00   4.3158783e+00
   1.8471551e+01  -2.6958016e+01   1.5000000e+02  -4.4623733e-01  -5.6210591e+00   4.4821931e+00
   1.8540219e+01  -2.7071091e+01   1.5000000e+02  -4.6210886e-01  -5.7753755e+00   4.5541261e+00
   1.8612953e+01  -2.7182167e+01   1.5000000e+02  -4.1787636e-01  -5.9469128e+00   4.4959501e+00
   1.8689691e+01  -2.7291131e+01   1.5000000e+02  -3.5620322e-01  -6.1320587e+00   4.2832131e+00
   1.8770366e+01  -2.7397869e+01   1.5000000e+02  -3.2217083e-01  -6.3204213e+00   3.9056979e+00
   1.8854906e+01  -2.7502272e+01   1.5000000e+02  -3.5900604e-01  -6.4955708e+00   3.3692162e+00
   1.8943236e+01  -2.7604231e+01   1.5000000e+02  -5.0416787e-01  -6.6373446e+00   2.6961530e+00
   1.9035274e+01  -2.7703640e+01   1.5000000e+02  -7.8577832e-01  -6.7254961e+00   1.9245063e+00
   1.9130935e+01  -2.7800395e+01   1.5000000e+02  -1.2195856e+00  -6.7442611e+00   1.1049009e+00
   1.9230129e+01  -2.7894394e+01   1.5000000e+02  -1.8067673e+00  -6.6867623e+00   2.9529929e-01
   1.9332762e+01  -2.7985538e+01   1.5000000e+02  -2.5332016e+00  -6.5581880e+00  -4.4643345e-01
   1.9438735e+01  -2.8073732e+01   1.5000000e+02  -3.3707510e+00  -6.3767546e+00  -1.0712270e+00
   1.9547944e+01  -2.8158881e+01   1.5000000e+02  -4.2808284e+00  -6.1718638e+00  -1.5473349e+00
   1.9660282e+01  -2.8240897e+01   1.5000000e+02  -5.2200941e+00  -5.9791853e+00  -1.8668672e+00
   1.9775638e+01  -2.8319690e+01   1.5000000e+02  -6.1473149e+00  -5.8333558e+00  -2.0482668e+00
   1.9893896e+01  -2.8395178e+01   1.5000000e+02  -7.0299866e+00  -5.7595956e+00  -2.1332678e+00
   2.0014936e+01  -2.8467279e+01   1.5000000e+02  -7.8486676e+00  -5.7668084e+00  -2.1782900e+00
   2.0138635e+01  -2.8535917e+01   1.5000000e+02  -8.5976040e+00  -5.8443232e+00  -2.2422305e+00
   2.0264866e+01  -2.8601016e+01   1.5000000e+02  -9.2812817e+00  -5.9636494e+00  -2.3742685e+00
   2.0393498e+01  -2.8662508e+01   1.5000000e+02  -9.9083620e+00  -6.0846323e+00  -2.6051770e+00
   2.0524398e+01  -2.8720326e+01   1.5000000e+02  -1.0485225e+01  -6.1641805e+00  -2.9444650e+00
   2.0657429e+01  -2.8774407e+01   1.5000000e+02  -1.1011431e+01  -6.1648305e+00  -3.3833077e+00
   2.0792450e+01  -2.8824692e+01   1.5000000e+02  -1.1478304e+01  -6.0607104e+00  -3.9017383e+00
   2.0929318e+01  -2.8871127e+01   1.5000000e+02  -1.1870553e+01  -5.8391084e+00  -4.4773387e+00
   2.1067889e+01  -2.8913662e+01   1.5000000e+02  -1.2169800e+01  -5.4972035e+00  -5.0923459e+00
   2.1208013e+01  -2.8952250e+01   1.5000000e+02  -1.2358475e+01  -5.0351610e+00  -5.7366130e+00
   2.1349541e+01  -2.8986849e+01   1.5000000e+02  -1.2422919e+01  -4.4480432e+00  -6.4053617e+00
   2.1492320e+01  -2.9017421e+01   1.5000000e+02  -1.2355113e+01  -3.7196238e+00  -7.0919673e+00
   2.1636196e+01  -2.9043932e+01   1.5000000e+02  -1.2153103e+01  -2.8208938e+00  -7.7776083e+00
   2.1781013e+01  -2.9066355e+01   1.5000000e+02  -1.1820400e+01  -1.7153416e+00  -8.4206581e+00
   2.1926614e+01  -2.9084663e+01   1.5000000e+02  -1.1364789e+01  -3.7132002e-01  -8.9501803e+00
   2.2072840e+01  -2.9098837e+01   1.5000000e+02  -1.0797468e+01   1.2206879e+00  -9.2677395e+00
   2.2219533e+01  -2.9108862e+01   1.5000000e+02  -1.0133227e+01   3.0314037e+00  -9.2607362e+00
   2.2366531e+01  -2.9114726e+01   1.5000000e+02  -9.3919765e+00   4.9836925e+00  -8.8259516e+00
   2.2513676e+01  -2.9116423e+01   1.5000000e+02  -8.6004912e+00   6.9573152e+00  -7.8970742e+00
   2.2660805e+01  -2.9113951e+01   1.5000000e+02  -7.7925989e+00   8.8082697e+00  -6.4664511e+00
   2.2807759e+01  -2.9107313e+01   1.5000000e+02  -7.0064476e+00   1.0397475e+01  -4.5918937e+00
   2.2954377e+01  -2.9096516e+01   1.5000000e+02  -6.2794852e+00   1.1618061e+01  -2.3857225e+00
   2.3100500e+01  -2.9081572e+01   1.5000000e+02  -5.6429396e+00   1.2412031e+01   9.2446076e-03
   2.3245967e+01  -2.9062498e+01   1.5000000e+02  -5.1178129e+00   1.2772389e+01   2.4468335e+00
   2.3390621e+01  -2.9039314e+01   1.5000000e+02  -4.7131639e+00   1.2733736e+01   4.7991437e+00
   2.3534304e+01  -2.9012045e+01   1.5000000e+02  -4.4264977e+00   1.2357629e+01   6.9681663e+00
   2.3676862e+01  -2.8980722e+01   1.5000000e+02  -4.2455068e+00   1.1718631e+01   8.8886317e+00
   2.3818141e+01  -2.8945379e+01   1.5000000e+02  -4.1507614e+00   1.0893912e+01   1.0525348e+01
   2.3957988e+01  -2.8906054e+01   1.5000000e+02  -4.1189995e+00   9.9563297e+00   1.1868591e+01
   2.4700234e+01  -2.8764147e+01   1.5000000e+02  -3.2741675e+00   4.4488463e+00   1.5115763e+01
   2.4828699e+01  -2.8701863e+01   1.5000000e+02  -3.2893148e+00   3.7191985e+00   1.5176550e+01
   2.4954798e+01  -2.8636081e+01   1.5000000e+02  -3.3137221e+00   3.0780067e+00   1.5146387e+01
   2.5078409e+01  -2.8566866e+01   1.5000000e+02  -3.3523006e+00   2.5226250e+00   1.5049759e+01
   2.5199411e+01  -2.8494290e+01   1.5000000e+02  -3.4102771e+00   2.0478969e+00   1.4908620e+01
   2.5317689e+01  -2.8418426e+01   1.5000000e+02  -3.4936500e+00   1.6460390e+00   1.4741699e+01
   2.5433129e+01  -2.8339351e+01   1.5000000e+02  -3.6093546e+00   1.3067397e+00   1.4562346e+01
   2.5545622e+01  -2.8257145e+01   1.5000000e+02  -3.7642620e+00   1.0183143e+00   1.4375803e+01
   2.5655063e+01  -2.8171890e+01   1.5000000e+02  -3.9628115e+00   7.7030391e-01   1.4177700e+01
   2.5761351e+01  -2.8083672e+01   1.5000000e+02  -4.2040874e+00   5.5672417e-01   1.3955512e+01
   2.5864388e+01  -2.7992580e+01   1.5000000e+02  -4.4799736e+00   3.7838027e-01   1.3693372e+01
   2.5964080e+01  -2.7898703e+01   1.5000000e+02  -4.7757430e+00   2.4275702e-01   1.3378731e+01
   2.6060338e+01  -2.7802136e+01   1.5000000e+02  -5.0732987e+00   1.6119075e-01   1.3008150e+01
   2.6153076e+01  -2.7702974e+01   1.5000000e+02  -5.3562611e+00   1.4452421e-01   1.2589880e+01
   2.6242214e+01  -2.7601315e+01   1.5000000e+02  -5.6151705e+00   1.9891235e-01   1.2142303e+01
   2.6327675e+01  -2.7497260e+01   1.5000000e+02  -5.8513135e+00   3.2323360e-01   1.1688809e+01
   2.6409385e+01  -2.7390910e+01   1.5000000e+02  -6.0778492e+00   5.0860001e-01   1.1250504e+01
   2.6487277e+01  -2.7282370e+01   1.5000000e+02  -6.3173273e+00   7.3976056e-01   1.0838736e+01
   2.6561286e+01  -2.7171746e+01   1.5000000e+02  -6.5956500e+00   9.9795393e-01   1.0449614e+01
   2.6631354e+01  -2.7059144e+01   1.5000000e+02  -6.9336024e+00   1.2644413e+00   1.0062678e+01
   2.6697424e+01  -2.6944675e+01   1.5000000e+02  -7.3385747e+00   1.5239181e+00   9.6449746e+00
   2.6759446e+01  -2.6828448e+01   1.5000000e+02  -7.7996251e+00   1.7669058e+00   9.1598111e+00
   2.6817373e+01  -2.6710576e+01   1.5000000e+02  -8.2880901e+00   1.9903084e+00   8.5775912e+00
   2.6871163e+01  -2.6591172e+01   1.5000000e+02  -8.7639490e+00   2.1959251e+00   7.8847498e+00
   2.6920779e+01  -2.6470349e+01   1.5000000e+02  -9.1856377e+00   2.3874230e+00   7.0875065e+00
   2.6966186e+01  -2.6348224e+01   1.5000000e+02  -9.5197115e+00   2.5670172e+00   6.2092826e+00
   2.7007356e+01  -2.6224910e+01   1.5000000e+02  -9.7471657e+00   2.7332526e+00   5.2831180e+00
   2.7044263e+01  -2.6100527e+01   1.5000000e+02  -9.8647532e+00   2.8806507e+00   4.3424101e+00
   2.7076887e+01  -2.5975189e+01   1.5000000e+02  -9.8816430e+00   3.0011811e+00   3.4129751e+00
   2.7105211e+01  -2.5849016e+01   1.5000000e+02  -9.8129186e+00   3.0867124e+00   2.5092799e+00
   2.7129222e+01  -2.5722126e+01   1.5000000e+02  -9.6724404e+00   3.1315069e+00   1.6356574e+00
   2.7148913e+01  -2.5594636e+01   1.5000000e+02  -9.4679273e+00   3.1339593e+00   7.9214854e-01
   2.7164279e+01  -2.5466666e+01   1.5000000e+02  -9.2006382e+00   3.0972593e+00  -1.7715952e-02
   2.7175320e+01  -2.5338334e+01   1.5000000e+02  -8.8700230e+00   3.0291523e+00  -7.8122048e-01
   2.7182040e+01  -2.5209758e+01   1.5000000e+02  -8.4810179e+00   2.9412474e+00  -1.4762102e+00
   2.7184445e+01  -2.5081057e+01   1.5000000e+02  -8.0498076e+00   2.8482778e+00  -2.0770189e+00
   2.7182549e+01  -2.4952349e+01   1.5000000e+02  -7.6045590e+00   2.7673363e+00  -2.5637947e+00
   2.7176365e+01  -2.4823752e+01   1.5000000e+02  -7.1805573e+00   2.7165973e+00  -2.9305855e+00
   2.7165913e+01  -2.4695383e+01   1.5000000e+02  -6.8122819e+00   2.7131677e+00  -3.1886939e+00
   2.7151215e+01  -2.4567359e+01   1.5000000e+02  -6.5260364e+00   2.7699522e+00  -3.3647918e+00
   2.7132298e+01  -2.4439796e+01   1.5000000e+02  -6.3353987e+00   2.8921965e+00  -3.4958288e+00
   2.7109191e+01  -2.4312809e+01   1.5000000e+02  -6.2395557e+00   3.0746222e+00  -3.6231511e+00
   2.7081927e+01  -2.4186513e+01   1.5000000e+02  -6.2233466e+00   3.3001725e+00  -3.7869940e+00
   2.7050544e+01  -2.4061021e+01   1.5000000e+02  -6.2582449e+00   3.5410355e+00  -4.0211271e+00
   2.7015080e+01  -2.3936446e+01   1.5000000e+02  -6.3046875e+00   3.7621045e+00  -4.3472450e+00
   2.6975579e+01  -2.3812898e+01   1.5000000e+02  -6.3167469e+00   3.9265381e+00  -4.7696311e+00
   2.6932088e+01  -2.3690489e+01   1.5000000e+02  -6.2498118e+00   4.0022105e+00  -5.2717838e+00
   2.6884655e+01  -2.3569327e+01   1.5000000e+02  -6.0703943e+00   3.9675319e+00  -5.8172867e+00
   2.6833334e+01  -2.3449519e+01   1.5000000e+02  -5.7654646e+00   3.8149288e+00  -6.3563067e+00
   2.6778179e+01  -2.3331172e+01   1.5000000e+02  -5.3476926e+00   3.5508520e+00  -6.8372141e+00
   2.6719250e+01  -2.3214390e+01   1.5000000e+02  -4.8536498e+00   3.1923224e+00  -7.2200549e+00
   2.6656606e+01  -2.3099276e+01   1.5000000e+02  -4.3346802e+00   2.7610606e+00  -7.4872021e+00
   2.6590313e+01  -2.2985930e+01   1.5000000e+02  -3.8432708e+00   2.2771672e+00  -7.6470468e+00
   2.6520437e+01  -2.2874454e+01   1.5000000e+02  -3.4195394e+00   1.7542806e+00  -7.7295415e+00
   2.6447046e+01  -2.2764942e+01   1.5000000e+02  -3.0820890e+00   1.1975977e+00  -7.7753348e+00
   2.6370214e+01  -2.2657493e+01   1.5000000e+02  -2.8256464e+00   6.0523080e-01  -7.8225207e+00
   2.6290014e+01  -2.2552199e+01   1.5000000e+02  -2.6253611e+00  -2.8001970e-02  -7.8953679e+00
   2.6206523e+01  -2.2449151e+01   1.5000000e+02  -2.4458961e+00  -7.0573396e-01  -7.9984049e+00
   2.6119820e+01  -2.2348440e+01   1.5000000e+02  -2.2519383e+00  -1.4261546e+00  -8.1171632e+00
   2.6029986e+01  -2.2250152e+01   1.5000000e+02  -2.0167983e+00  -2.1804751e+00  -8.2243649e+00
   2.5937105e+01  -2.2154373e+01   1.5000000e+02  -1.7268366e+00  -2.9540164e+00  -8.2885018e+00
   2.5841262e+01  -2.2061186e+01   1.5000000e+02  -1.3813818e+00  -3.7291537e+00  -8.2813934e+00
   2.5742546e+01  -2.1970670e+01   1.5000000e+02  -9.8948024e-01  -4.4885035e+00  -8.1824790e+00
   2.5641045e+01  -2.1882904e+01   1.5000000e+02  -5.6547124e-01  -5.2169284e+00  -7.9794408e+00
   2.5536852e+01  -2.1797963e+01   1.5000000e+02  -1.2529360e-01  -5.9016280e+00  -7.6664138e+00
   2.5430060e+01  -2.1715921e+01   1.5000000e+02   3.1562178e-01  -6.5304845e+00  -7.2416468e+00
   2.5320763e+01  -2.1636847e+01   1.5000000e+02   7.4271376e-01  -7.0896579e+00  -6.7064023e+00
   2.5209060e+01  -2.1560809e+01   1.5000000e+02   1.1415521e+00  -7.5617883e+00  -6.0659638e+00
   2.5095048e+01  -2.1487873e+01   1.5000000e+02   1.4969715e+00  -7.9262132e+00  -5.3323628e+00
   2.4978827e+01  -2.1418100e+01   1.5000000e+02   1.7928118e+00  -8.1617802e+00  -4.5275686e+00
   2.4860499e+01  -2.1351551e+01   1.5000000e+02   2.0127762e+00  -8.2518671e+00  -3.6852899e+00
   2.4740167e+01  -2.1288282e+01   1.5000000e+02   2.1422650e+00  -8.1903081e+00  -2.8499183e+00
   2.4617936e+01  -2.1228348e+01   1.5000000e+02   2.1706480e+00  -7.9863268e+00  -2.0720902e+00
   2.4493910e+01  -2.1171798e+01   1.5000000e+02   2.0932091e+00  -7.6667444e+00  -1.4013607e+00
   2.4368197e+01  -2.1118682e+01   1.5000000e+02   1.9121025e+00  -7.2742805e+00  -8.7773728e-01
   2.4240904e+01  -2.1069044e+01   1.5000000e+02   1.6359288e+00  -6.8617922e+00  -5.2428930e-01
   2.4112140e+01  -2.1022927e+01   1.5000000e+02   1.2780675e+00  -6.4837471e+00  -3.4337443e-01
   2.3982015e+01  -2.0980369e+01   1.5000000e+02   8.5430459e-01  -6.1873936e+00  -3.1771086e-01
   2.3850640e+01  -2.0941408e+01   1.5000000e+02   3.8064624e-01  -6.0064625e+00  -4.1582096e-01
   2.3718127e+01  -2.0906075e+01   1.5000000e+02  -1.2803080e-01  -5.9591045e+00  -5.9949213e-01
   2.3584587e+01  -2.0874402e+01   1.5000000e+02  -6.5821001e-01  -6.0499928e+00  -8.3040952e-01
   2.3450134e+01  -2.0846414e+01   1.5000000e+02  -1.1972730e+00  -6.2746918e+00  -1.0739030e+00
   2.3314881e+01  -2.0822136e+01   1.5000000e+02  -1.7328967e+00  -6.6240625e+00  -1.2995764e+00
   2.3178943e+01  -2.0801588e+01   1.5000000e+02  -2.2528237e+00  -7.0869329e+00  -1.4799784e+00
   2.3042434e+01  -2.0784787e+01   1.5000000e+02  -2.7451272e+00  -7.6507438e+00  -1.5890292e+00
   2.2905469e+01  -2.0771748e+01   1.5000000e+02  -3.1988618e+00  -8.3008075e+00  -1.6013984e+00
   2.2768162e+01  -2.0762482e+01   1.5000000e+02  -3.6049619e+00  -9.0193105e+00  -1.4931702e+00
   2.2630631e+01  -2.0756996e+01   1.5000000e+02  -3.9571416e+00  -9.7848836e+00  -1.2433453e+00
   2.2492990e+01  -2.0755296e+01   1.5000000e+02  -4.2525763e+00  -1.0573136e+01  -8.3540117e-01
   2.2355354e+01  -2.0757382e+01   1.5000000e+02  -4.4919668e+00  -1.1357724e+01  -2.5835445e-01
   2.2217840e+01  -2.0763253e+01   1.5000000e+02  -4.6787914e+00  -1.2111483e+01   4.9303728e-01
   2.2080563e+01  -2.0772904e+01   1.5000000e+02  -4.8178800e+00  -1.2806969e+01   1.4186471e+00
   2.1943639e+01  -2.0786326e+01   1.5000000e+02  -4.9137504e+00  -1.3416095e+01   2.5132149e+00
   2.1807183e+01  -2.0803510e+01   1.5000000e+02  -4.9693498e+00  -1.3909390e+01   3.7657014e+00
   2.1671309e+01  -2.0824438e+01   1.5000000e+02  -4.9856540e+00  -1.4255899e+01   5.1573525e+00
   2.1536133e+01  -2.0849095e+01   1.5000000e+02  -4.9621881e+00  -1.4424912e+01   6.6592768e+00
   2.1401768e+01  -2.0877460e+01   1.5000000e+02  -4.8982026e+00  -1.4389931e+01   8.2309171e+00
   2.1268327e+01  -2.0909507e+01   1.5000000e+02  -4.7939844e+00  -1.4134128e+01   9.8209854e+00
   2.1135925e+01  -2.0945211e+01   1.5000000e+02  -4.6518011e+00  -1.3655546e+01   1.1371704e+01
   2.1004672e+01  -2.0984540e+01   1.5000000e+02  -4.4761302e+00  -1.2969928e+01   1.2825824e+01
   2.0874681e+01  -2.1027462e+01   1.5000000e+02  -4.2730346e+00  -1.2109840e+01   1.4134414e+01
   2.0746062e+01  -2.1073939e+01   1.5000000e+02  -4.0488522e+00  -1.1119995e+01   1.5263229e+01
   2.0618925e+01  -2.1123933e+01   1.5000000e+02  -3.8086308e+00  -1.0050281e+01   1.6195651e+01
   2.0493378e+01  -2.1177402e+01   1.5000000e+02  -3.5549267e+00  -8.9485650e+00   1.6931773e+01
   2.0369531e+01  -2.1234298e+01   1.5000000e+02  -3.2874604e+00  -7.8552212e+00   1.7484507e+01
   2.0247488e+01  -2.1294575e+01   1.5000000e+02  -3.0037338e+00  -6.8001743e+00   1.7874443e+01
   2.0127355e+01  -2.1358180e+01   1.5000000e+02  -2.7004114e+00  -5.8027302e+00   1.8124944e+01
   2.0009238e+01  -2.1425060e+01   1.5000000e+02  -2.3748148e+00  -4.8732493e+00   1.8258725e+01
   1.9893237e+01  -2.1495158e+01   1.5000000e+02  -2.0260097e+00  -4.0157895e+00   1.8296177e+01
   1.9779456e+01  -2.1568413e+01   1.5000000e+02  -1.6551389e+00  -3.2308752e+00   1.8255228e+01
   1.9667993e+01  -2.1644763e+01   1.5000000e+02  -1.2648955e+00  -2.5174634e+00   1.8152095e+01
   1.9558947e+01  -2.1724142e+01   1.5000000e+02  -8.5845548e-01  -1.8740663e+00   1.8002120e+01
   1.9452415e+01  -2.1806483e+01   1.5000000e+02  -4.3821965e-01  -1.2989458e+00   1.7820037e+01
   1.9348492e+01  -2.1891715e+01   1.5000000e+02  -4.9239586e-03  -7.8989762e-01   1.7619344e+01
   1.9247271e+01  -2.1979765e+01   1.5000000e+02   4.4248696e-01  -3.4408402e-01   1.7411030e+01
   1.9148843e+01  -2.2070556e+01   1.5000000e+02   9.0608537e-01   4.1740632e-02   1.7202290e+01
   1.9053298e+01  -2.2164012e+01   1.5000000e+02   1.3876414e+00   3.7068421e-01   1.6996023e+01
   1.8960724e+01  -2.2260050e+01   1.5000000e+02   1.8873464e+00   6.4519055e-01   1.6791393e+01
   1.8871205e+01  -2.2358588e+01   1.5000000e+02   2.4032191e+00   8.6701918e-01   1.6585199e+01
   1.8784825e+01  -2.2459542e+01   1.5000000e+02   2.9312303e+00   1.0378204e+00   1.6373289e+01
   1.8701666e+01  -2.2562822e+01   1.5000000e+02   3.4658429e+00   1.1600906e+00   1.6151363e+01
   1.8621805e+01  -2.2668340e+01   1.5000000e+02   4.0005036e+00   1.2380005e+00   1.5915051e+01
   1.8545320e+01  -2.2776004e+01   1.5000000e+02   4.5276803e+00   1.2776156e+00   1.5659664e+01
   1.8472284e+01  -2.2885720e+01   1.5000000e+02   5.0386326e+00   1.2863884e+00   1.5380122e+01
   1.8402770e+01  -2.2997391e+01   1.5000000e+02   5.5231924e+00   1.2720728e+00   1.5071498e+01
   1.8336845e+01  -2.3110921e+01   1.5000000e+02   5.9699618e+00   1.2414049e+00   1.4730132e+01
   1.8274577e+01  -2.3226210e+01   1.5000000e+02   6.3671344e+00   1.1989283e+00   1.4355150e+01
   1.8216029e+01  -2.3343157e+01   1.5000000e+02   6.7040745e+00   1.1463282e+00   1.3949782e+01
   1.8161262e+01  -2.3461657e+01   1.5000000e+02   6.9733733e+00   1.0825074e+00   1.3521971e+01
   1.8110335e+01  -2.3581608e+01   1.5000000e+02   7.1728707e+00   1.0044149e+00   1.3083697e+01
   1.8063301e+01  -2.3702902e+01   1.5000000e+02   7.3068556e+00   9.0843174e-01   1.2648993e+01
   1.8020214e+01  -2.3825432e+01   1.5000000e+02   7.3860423e+00   7.9178831e-01   1.2230988e+01
   1.7981122e+01  -2.3949089e+01   1.5000000e+02   7.4260454e+00   6.5371870e-01   1.1838677e+01
   1.7946072e+01  -2.4073763e+01   1.5000000e+02   7.4446306e+00   4.9595607e-01   1.1474229e+01
   1.7915107e+01  -2.4199342e+01   1.5000000e+02   7.4581036e+00   3.2252780e-01   1.1131504e+01
   1.7888265e+01  -2.4325714e+01   1.5000000e+02   7.4774969e+00   1.3882522e-01   1.0796414e+01
   1.7865583e+01  -2.4452765e+01   1.5000000e+02   7.5054650e+00  -4.9857810e-02   1.0449418e+01
   1.7847095e+01  -2.4580380e+01   1.5000000e+02   7.5349048e+00  -2.3987186e-01   1.0069811e+01
   1.7832828e+01  -2.4708444e+01   1.5000000e+02   7.5500210e+00  -4.3032650e-01   9.6406588e+00
   1.7822810e+01  -2.4836842e+01   1.5000000e+02   7.5297090e+00  -6.2346109e-01   9.1528175e+00
   1.7817062e+01  -2.4965456e+01   1.5000000e+02   7.4520365e+00  -8.2396689e-01   8.6067204e+00
   1.7815603e+01  -2.5094168e+01   1.5000000e+02   7.2982555e+00  -1.0376839e+00   8.0116994e+00
   1.7818447e+01  -2.5222862e+01   1.5000000e+02   7.0551072e+00  -1.2698971e+00   7.3837472e+00
   1.7825607e+01  -2.5351418e+01   1.5000000e+02   6.7153633e+00  -1.5237702e+00   6.7431432e+00
   1.7837088e+01  -2.5479719e+01   1.5000000e+02   6.2773865e+00  -1.7991773e+00   6.1127453e+00
   1.7852895e+01  -2.5607646e+01   1.5000000e+02   5.7448767e+00  -2.0923876e+00   5.5171139e+00
   1.7873026e+01  -2.5735080e+01   1.5000000e+02   5.1273297e+00  -2.3964508e+00   4.9816710e+00
   1.7897477e+01  -2.5861902e+01   1.5000000e+02   4.4410697e+00  -2.7023451e+00   4.5311517e+00
   1.7926240e+01  -2.5987996e+01   1.5000000e+02   3.7099812e+00  -3.0003703e+00   4.1869431e+00
   1.7959301e+01  -2.6113241e+01   1.5000000e+02   2.9650547e+00  -3.2814700e+00   3.9637113e+00
   1.7996643e+01  -2.6237521e+01   1.5000000e+02   2.2420316e+00  -3.5383146e+00   3.8661841e+00
   1.8038245e+01  -2.6360719e+01   1.5000000e+02   1.5775570e+00  -3.7660418e+00   3.8872391e+00
   1.8084083e+01  -2.6482717e+01   1.5000000e+02   1.0045694e+00  -3.9628250e+00   4.0078233e+00
   1.8134125e+01  -2.6603401e+01   1.5000000e+02   5.4800268e-01  -4.1302565e+00   4.1986669e+00
   1.8188338e+01  -2.6722654e+01   1.5000000e+02   2.2164921e-01  -4.2735769e+00   4.4231374e+00
   1.8246685e+01  -2.6840364e+01   1.5000000e+02   2.6441402e-02  -4.4012796e+00   4.6406414e+00
   1.8309121e+01  -2.6956416e+01   1.5000000e+02  -4.9762298e-02  -4.5239488e+00   4.8100953e+00
   1.8375601e+01  -2.7070700e+01   1.5000000e+02  -3.1096451e-02  -4.6523521e+00   4.8933898e+00
   1.8446073e+01  -2.7183105e+01   1.5000000e+02   4.8662120e-02  -4.7950144e+00   4.8586912e+00
   1.8520480e+01  -2.7293523e+01   1.5000000e+02   1.4941417e-01  -4.9559100e+00   4.6832972e+00
   1.8598764e+01  -2.7401844e+01   1.5000000e+02   2.2850702e-01  -5.1327872e+00   4.3557381e+00
   1.8680860e+01  -2.7507965e+01   1.5000000e+02   2.4443543e-01  -5.3163826e+00   3.8771202e+00
   1.8766698e+01  -2.7611781e+01   1.5000000e+02   1.6000684e-01  -5.4911056e+00   3.2619396e+00
   1.8856206e+01  -2.7713190e+01   1.5000000e+02  -5.4829403e-02  -5.6372844e+00   2.5383320e+00
   1.8949307e+01  -2.7812092e+01   1.5000000e+02  -4.2029458e-01  -5.7348825e+00   1.7473017e+00
   1.9045919e+01  -2.7908389e+01   1.5000000e+02  -9.4430246e-01  -5.7680997e+00   9.4011940e-01
   1.9145956e+01  -2.8001987e+01   1.5000000e+02  -1.6207051e+00  -5.7297980e+00   1.7337843e-01
   1.9249328e+01  -2.8092791e+01   1.5000000e+02  -2.4289837e+00  -5.6246564e+00  -4.9803912e-01
   1.9355941e+01  -2.8180711e+01   1.5000000e+02  -3.3360422e+00  -5.4700612e+00  -1.0292159e+00
   1.9465698e+01  -2.8265659e+01   1.5000000e+02  -4.3002583e+00  -5.2942956e+00  -1.3930638e+00
   1.9578496e+01  -2.8347550e+01   1.5000000e+02  -5.2774128e+00  -5.1318583e+00  -1.5860463e+00
   1.9694230e+01  -2.8426301e+01   1.5000000e+02  -6.2275258e+00  -5.0165326e+00  -1.6299537e+00
   1.9812791e+01  -2.8501834e+01   1.5000000e+02  -7.1209724e+00  -4.9735742e+00  -1.5684607e+00
   1.9934064e+01  -2.8574071e+01   1.5000000e+02  -7.9420516e+00  -5.0132921e+00  -1.4586861e+00
   2.0057933e+01  -2.8642939e+01   1.5000000e+02  -8.6888608e+00  -5.1280862e+00  -1.3597893e+00
   2.0184280e+01  -2.8708368e+01   1.5000000e+02  -9.3693871e+00  -5.2940002e+00  -1.3219829e+00
   2.0312979e+01  -2.8770292e+01   1.5000000e+02  -9.9953800e+00  -5.4761004e+00  -1.3790256e+00
   2.0443904e+01  -2.8828647e+01   1.5000000e+02  -1.0576281e+01  -5.6359502e+00  -1.5458442e+00
   2.0576927e+01  -2.8883373e+01   1.5000000e+02  -1.1115056e+01  -5.7389077e+00  -1.8209355e+00
   2.0711915e+01  -2.8934415e+01   1.5000000e+02  -1.1606831e+01  -5.7594105e+00  -2.1921020e+00
   2.0848732e+01  -2.8981720e+01   1.5000000e+02  -1.2040078e+01  -5.6829215e+00  -2.6435551e+00
   2.0987242e+01  -2.9025238e+01   1.5000000e+02  -1.2399324e+01  -5.5039363e+00  -3.1621149e+00
   2.1127305e+01  -2.9064927e+01   1.5000000e+02  -1.2668140e+01  -5.2205928e+00  -3.7404926e+00
   2.1268778e+01  -2.9100743e+01   1.5000000e+02  -1.2831543e+01  -4.8275433e+00  -4.3767020e+00
   2.1411518e+01  -2.9132651e+01   1.5000000e+02  -1.2877573e+01  -4.3094018e+00  -5.0687961e+00
   2.1555379e+01  -2.9160617e+01   1.5000000e+02  -1.2797954e+01  -3.6375666e+00  -5.8060942e+00
   2.1700213e+01  -2.9184612e+01   1.5000000e+02  -1.2588031e+01  -2.7727547e+00  -6.5587061e+00
   2.1845873e+01  -2.9204611e+01   1.5000000e+02  -1.2246117e+01  -1.6743868e+00  -7.2691067e+00
   2.1992207e+01  -2.9220594e+01   1.5000000e+02  -1.1772924e+01  -3.1574816e-01  -7.8499029e+00
   2.2139067e+01  -2.9232544e+01   1.5000000e+02  -1.1172014e+01   1.2991916e+00  -8.1913928e+00
   2.2286299e+01  -2.9240449e+01   1.5000000e+02  -1.0452082e+01   3.1228683e+00  -8.1792075e+00
   2.2433751e+01  -2.9244300e+01   1.5000000e+02  -9.6303767e+00   5.0614089e+00  -7.7189411e+00
   2.2581273e+01  -2.9244093e+01   1.5000000e+02  -8.7354158e+00   6.9851613e+00  -6.7605107e+00
   2.2728710e+01  -2.9239829e+01   1.5000000e+02  -7.8067370e+00   8.7509760e+00  -5.3139399e+00
   2.2875911e+01  -2.9231512e+01   1.5000000e+02  -6.8906155e+00   1.0229778e+01  -3.4500950e+00
   2.3022724e+01  -2.9219151e+01   1.5000000e+02  -6.0331680e+00   1.1329548e+01  -1.2860805e+00
   2.3168997e+01  -2.9202758e+01   1.5000000e+02  -5.2732056e+00   1.2006759e+01   1.0387861e+00
   2.3314579e+01  -2.9182350e+01   1.5000000e+02  -4.6371090e+00   1.2264571e+01   3.3874014e+00
   2.3459321e+01  -2.9157949e+01   1.5000000e+02  -4.1366360e+00   1.2141874e+01   5.6424875e+00
   2.3603074e+01  -2.9129581e+01   1.5000000e+02  -3.7694358e+00   1.1699458e+01   7.7149155e+00
   2.3745692e+01  -2.9097273e+01   1.5000000e+02  -3.5215047e+00   1.1008194e+01   9.5447860e+00
   2.3887028e+01  -2.9061061e+01   1.5000000e+02  -3.3708389e+00   1.0140875e+01   1.1098718e+01
   2.4026939e+01  -2.9020980e+01   1.5000000e+02  -3.2917478e+00   9.1668633e+00   1.2366336e+01
   2.4165283e+01  -2.8977074e+01   1.5000000e+02  -3.2591072e+00   8.1479966e+00   1.3356413e+01
   2.4301920e+01  -2.8929386e+01   1.5000000e+02  -3.2520289e+00   7.1352238e+00   1.4092408e+01
   2.4436714e+01  -2.8877967e+01   1.5000000e+02  -3.2560879e+00   6.1664432e+00   1.4607012e+01
   2.4569529e+01  -2.8822868e+01   1.5000000e+02  -3.2639356e+00   5.2664518e+00   1.4936426e+01
   2.5284045e+01  -2.8598997e+01   1.5000000e+02  -2.5386948e+00   1.2224847e+00   1.4668775e+01
   2.5402001e+01  -2.8523370e+01   1.5000000e+02  -2.6439393e+00   8.6887110e-01   1.4484504e+01
   2.5517216e+01  -2.8444644e+01   1.5000000e+02  -2.7774370e+00   5.7452925e-01   1.4303189e+01
   2.5629585e+01  -2.8362894e+01   1.5000000e+02  -2.9436947e+00   3.2511898e-01   1.4130461e+01
   2.5739012e+01  -2.8278198e+01   1.5000000e+02  -3.1464160e+00   1.0788160e-01   1.3961967e+01
   2.5845402e+01  -2.8190634e+01   1.5000000e+02  -3.3857309e+00  -8.4770500e-02   1.3784339e+01
   2.5948661e+01  -2.8100286e+01   1.5000000e+02  -3.6559419e+00  -2.5257498e-01   1.3579571e+01
   2.6048704e+01  -2.8007237e+01   1.5000000e+02  -3.9453594e+00  -3.8722166e-01   1.3331516e+01
   2.6145445e+01  -2.7911575e+01   1.5000000e+02  -4.2385775e+00  -4.7504077e-01   1.3031950e+01
   2.6238805e+01  -2.7813389e+01   1.5000000e+02  -4.5205139e+00  -5.0157844e-01   1.2683852e+01
   2.6328707e+01  -2.7712769e+01   1.5000000e+02  -4.7809243e+00  -4.5617004e-01   1.2301046e+01
   2.6415077e+01  -2.7609809e+01   1.5000000e+02  -5.0181533e+00  -3.3514768e-01   1.1904594e+01
   2.6497849e+01  -2.7504604e+01   1.5000000e+02  -5.2412067e+00  -1.4308356e-01   1.1516945e+01
   2.6576956e+01  -2.7397250e+01   1.5000000e+02  -5.4693105e+00   1.0783766e-01   1.1155050e+01
   2.6652337e+01  -2.7287846e+01   1.5000000e+02  -5.7282150e+00   3.9988541e-01   1.0823874e+01
   2.6723936e+01  -2.7176491e+01   1.5000000e+02  -6.0434608e+00   7.1298920e-01   1.0512335e+01
   2.6791700e+01  -2.7063287e+01   1.5000000e+02  -6.4319859e+00   1.0284273e+00   1.0193642e+01
   2.6855579e+01  -2.6948337e+01   1.5000000e+02  -6.8948518e+00   1.3321480e+00   9.8309665e+00
   2.6915529e+01  -2.6831743e+01   1.5000000e+02  -7.4140833e+00   1.6166676e+00   9.3872762e+00
   2.6971508e+01  -2.6713612e+01   1.5000000e+02  -7.9553641e+00   1.8808075e+00   8.8361151e+00
   2.7023479e+01  -2.6594048e+01   1.5000000e+02  -8.4760321e+00   2.1273800e+00   8.1691351e+00
   2.7071409e+01  -2.6473160e+01   1.5000000e+02  -8.9352925e+00   2.3597571e+00   7.3976317e+00
   2.7115268e+01  -2.6351054e+01   1.5000000e+02  -9.3030267e+00   2.5789290e+00   6.5477327e+00
   2.7155030e+01  -2.6227838e+01   1.5000000e+02  -9.5643065e+00   2.7822053e+00   5.6518310e+00
   2.7190675e+01  -2.6103623e+01   1.5000000e+02  -9.7189831e+00   2.9638987e+00   4.7396138e+00
   2.7222184e+01  -2.5978518e+01   1.5000000e+02  -9.7772624e+00   3.1173479e+00   3.8315626e+00
   2.7249543e+01  -2.5852632e+01   1.5000000e+02  -9.7530164e+00   3.2372105e+00   2.9368309e+00
   2.7272741e+01  -2.5726075e+01   1.5000000e+02  -9.6571745e+00   3.3211226e+00   2.0559010e+00
   2.7291773e+01  -2.5598959e+01   1.5000000e+02  -9.4936746e+00   3.3702687e+00   1.1871052e+00
   2.7306634e+01  -2.5471393e+01   1.5000000e+02  -9.2598878e+00   3.3889370e+00   3.3432474e-01
   2.7317326e+01  -2.5343488e+01   1.5000000e+02  -8.9516316e+00   3.3836259e+00  -4.8760101e-01
   2.7323852e+01  -2.5215355e+01   1.5000000e+02  -8.5704333e+00   3.3623815e+00  -1.2529166e+00
   2.7326221e+01  -2.5087105e+01   1.5000000e+02  -8.1292650e+00   3.3348100e+00  -1.9307099e+00
   2.7324443e+01  -2.4958846e+01   1.5000000e+02  -7.6537179e+00   3.3124639e+00  -2.4938623e+00
   2.7318532e+01  -2.4830689e+01   1.5000000e+02  -7.1782352e+00   3.3088163e+00  -2.9270651e+00
   2.7308508e+01  -2.4702744e+01   1.5000000e+02  -6.7394737e+00   3.3379609e+00  -3.2310415e+00
   2.7294390e+01  -2.4575119e+01   1.5000000e+02  -6.3698022e+00   3.4118037e+00  -3.4224112e+00
   2.7276203e+01  -2.4447922e+01   1.5000000e+02  -6.0927198e+00   3.5364892e+00  -3.5307497e+00
   2.7253974e+01  -2.4321261e+01   1.5000000e+02  -5.9201372e+00   3.7090977e+00  -3.5946878e+00
   2.7227735e+01  -2.4195243e+01   1.5000000e+02  -5.8505308e+00   3.9158272e+00  -3.6576986e+00
   2.7197519e+01  -2.4069973e+01   1.5000000e+02  -5.8675080e+00   4.1323501e+00  -3.7630625e+00
   2.7163362e+01  -2.3945558e+01   1.5000000e+02  -5.9394936e+00   4.3266589e+00  -3.9473671e+00
   2.7125304e+01  -2.3822100e+01   1.5000000e+02  -6.0221318e+00   4.4641250e+00  -4.2329425e+00
   2.7083388e+01  -2.3699702e+01   1.5000000e+02  -6.0647623e+00   4.5137675e+00  -4.6211248e+00
   2.7037658e+01  -2.3578467e+01   1.5000000e+02  -6.0208315e+00   4.4542716e+00  -5.0892668e+00
   2.6988164e+01  -2.3458495e+01   1.5000000e+02  -5.8598887e+00   4.2779943e+00  -5.5940666e+00
   2.6934955e+01  -2.3339886e+01   1.5000000e+02  -5.5770019e+00   3.9915756e+00  -6.0818748e+00
   2.6878085e+01  -2.3222737e+01   1.5000000e+02  -5.1953482e+00   3.6130163e+00  -6.5033437e+00
   2.6817610e+01  -2.3107144e+01   1.5000000e+02  -4.7601606e+00   3.1661118e+00  -6.8274850e+00
   2.6753589e+01  -2.2993204e+01   1.5000000e+02  -4.3258323e+00   2.6740219e+00  -7.0498879e+00
   2.6686081e+01  -2.2881009e+01   1.5000000e+02  -3.9407123e+00   2.1537365e+00  -7.1922732e+00
   2.6615151e+01  -2.2770651e+01   1.5000000e+02  -3.6346962e+00   1.6129085e+00  -7.2938768e+00
   2.6540863e+01  -2.2662220e+01   1.5000000e+02  -3.4129710e+00   1.0496749e+00  -7.3980055e+00
   2.6463287e+01  -2.2555805e+01   1.5000000e+02  -3.2571701e+00   4.5551074e-01  -7.5381536e+00
   2.6382491e+01  -2.2451492e+01   1.5000000e+02  -3.1327804e+00  -1.7986278e-01  -7.7280751e+00
   2.6298547e+01  -2.2349366e+01   1.5000000e+02  -3.0000931e+00  -8.6307389e-01  -7.9585855e+00
   2.6211531e+01  -2.2249510e+01   1.5000000e+02  -2.8249612e+00  -1.5931727e+00  -8.2015618e+00
   2.6121518e+01  -2.2152005e+01   1.5000000e+02  -2.5861036e+00  -2.3605222e+00  -8.4189249e+00
   2.6028587e+01  -2.2056929e+01   1.5000000e+02  -2.2774187e+00  -3.1486141e+00  -8.5727986e+00
   2.5932816e+01  -2.1964359e+01   1.5000000e+02  -1.9056964e+00  -3.9377738e+00  -8.6332398e+00
   2.5834289e+01  -2.1874369e+01   1.5000000e+02  -1.4857930e+00  -4.7090038e+00  -8.5816041e+00
   2.5733089e+01  -2.1787033e+01   1.5000000e+02  -1.0354470e+00  -5.4464764e+00  -8.4096344e+00
   2.5629301e+01  -2.1702420e+01   1.5000000e+02  -5.7157556e-01  -6.1378658e+00  -8.1159977e+00
   2.5523013e+01  -2.1620598e+01   1.5000000e+02  -1.0871524e-01  -6.7725962e+00  -7.7024835e+00
   2.5414312e+01  -2.1541632e+01   1.5000000e+02   3.4058545e-01  -7.3389974e+00  -7.1718214e+00
   2.5303289e+01  -2.1465587e+01   1.5000000e+02   7.6416631e-01  -7.8216977e+00  -6.5282243e+00
   2.5190035e+01  -2.1392522e+01   1.5000000e+02   1.1485903e+00  -8.2008377e+00  -5.7804109e+00
   2.5074643e+01  -2.1322496e+01   1.5000000e+02   1.4783233e+00  -8.4539424e+00  -4.9458354e+00
   2.4957208e+01  -2.1255564e+01   1.5000000e+02   1.7363556e+00  -8.5605144e+00  -4.0540776e+00
   2.4837825e+01  -2.1191781e+01   1.5000000e+02   1.9062104e+00  -8.5081460e+00  -3.1475176e+00
   2.4716590e+01  -2.1131197e+01   1.5000000e+02   1.9746930e+00  -8.2983895e+00  -2.2782966e+00
   2.4593602e+01  -2.1073860e+01   1.5000000e+02   1.9344792e+00  -7.9504842e+00  -1.5017718e+00
   2.4468959e+01  -2.1019816e+01   1.5000000e+02   1.7856978e+00  -7.5015283e+00  -8.6774002e-01
   2.4342761e+01  -2.0969108e+01   1.5000000e+02   1.5359987e+00  -7.0025063e+00  -4.1169857e-01
   2.4215110e+01  -2.0921775e+01   1.5000000e+02   1.1990969e+00  -6.5107160e+00  -1.4864093e-01
   2.4086107e+01  -2.0877856e+01   1.5000000e+02   7.9226686e-01  -6.0805498e+00  -7.1475478e-02
   2.3955855e+01  -2.0837385e+01   1.5000000e+02   3.3361766e-01  -5.7554652e+00  -1.5451404e-01
   2.3824456e+01  -2.0800394e+01   1.5000000e+02  -1.5995099e-01  -5.5635982e+00  -3.6048806e-01
   2.3692016e+01  -2.0766913e+01   1.5000000e+02  -6.7363073e-01  -5.5178689e+00  -6.4818270e-01
   2.3558639e+01  -2.0736969e+01   1.5000000e+02  -1.1945917e+00  -5.6194614e+00  -9.7805372e-01
   2.3424429e+01  -2.0710584e+01   1.5000000e+02  -1.7113556e+00  -5.8624647e+00  -1.3145994e+00
   2.3289494e+01  -2.0687779e+01   1.5000000e+02  -2.2132022e+00  -6.2375640e+00  -1.6259857e+00
   2.3153938e+01  -2.0668574e+01   1.5000000e+02  -2.6899953e+00  -6.7337402e+00  -1.8824749e+00
   2.3017869e+01  -2.0652982e+01   1.5000000e+02  -3.1323760e+00  -7.3380177e+00  -2.0551608e+00
   2.2881394e+01  -2.0641017e+01   1.5000000e+02  -3.5322881e+00  -8.0343189e+00  -2.1159165e+00
   2.2744620e+01  -2.0632688e+01   1.5000000e+02  -3.8837416e+00  -8.8023614e+00  -2.0387046e+00
   2.2607654e+01  -2.0628000e+01   1.5000000e+02  -4.1835885e+00  -9.6175153e+00  -1.8016777e+00
   2.2470603e+01  -2.0626959e+01   1.5000000e+02  -4.4319879e+00  -1.0451871e+01  -1.3891829e+00
   2.2333575e+01  -2.0629565e+01   1.5000000e+02  -4.6322065e+00  -1.1276103e+01  -7.9288837e-01
   2.2196678e+01  -2.0635815e+01   1.5000000e+02  -4.7895704e+00  -1.2061313e+01  -1.1497349e-02
   2.2060019e+01  -2.0645705e+01   1.5000000e+02  -4.9098212e+00  -1.2779858e+01   9.5054227e-01
   2.1923705e+01  -2.0659227e+01   1.5000000e+02  -4.9974335e+00  -1.3404771e+01   2.0842232e+00
   2.1787844e+01  -2.0676371e+01   1.5000000e+02  -5.0544878e+00  -1.3908403e+01   3.3759255e+00
   2.1652541e+01  -2.0697122e+01   1.5000000e+02  -5.0804773e+00  -1.4261680e+01   4.8056704e+00
   2.1517904e+01  -2.0721465e+01   1.5000000e+02  -5.0730401e+00  -1.4435325e+01   6.3443370e+00
   2.1384039e+01  -2.0749379e+01   1.5000000e+02  -5.0293359e+00  -1.4403657e+01   7.9516380e+00
   2.1251050e+01  -2.0780844e+01   1.5000000e+02  -4.9475529e+00  -1.4150114e+01   9.5765901e+00
   2.1119044e+01  -2.0815834e+01   1.5000000e+02  -4.8280869e+00  -1.3672672e+01   1.1161270e+01
   2.0988125e+01  -2.0854321e+01   1.5000000e+02  -4.6739843e+00  -1.2986999e+01   1.2647640e+01
   2.0858395e+01  -2.0896275e+01   1.5000000e+02  -4.4904967e+00  -1.2125895e+01   1.3985380e+01
   2.0729960e+01  -2.0941663e+01   1.5000000e+02  -4.2838361e+00  -1.1134980e+01   1.5138439e+01
   2.0602920e+01  -2.0990449e+01   1.5000000e+02  -4.0594784e+00  -1.0065751e+01   1.6088627e+01
   2.0477377e+01  -2.1042593e+01   1.5000000e+02  -3.8206368e+00  -8.9682197e+00   1.6835224e+01
   2.0353432e+01  -2.1098055e+01   1.5000000e+02  -3.5674647e+00  -7.8848252e+00   1.7391488e+01
   2.0231184e+01  -2.1156791e+01   1.5000000e+02  -3.2973649e+00  -6.8468976e+00   1.7779370e+01
   2.0110731e+01  -2.1218753e+01   1.5000000e+02  -3.0062675e+00  -5.8739394e+00   1.8024118e+01
   1.9992172e+01  -2.1283893e+01   1.5000000e+02  -2.6903766e+00  -4.9752331e+00   1.8150117e+01
   1.9875602e+01  -2.1352159e+01   1.5000000e+02  -2.3477574e+00  -4.1527654e+00   1.8178630e+01
   1.9761115e+01  -2.1423495e+01   1.5000000e+02  -1.9792134e+00  -3.4044696e+00   1.8127425e+01
   1.9648807e+01  -2.1497846e+01   1.5000000e+02  -1.5882219e+00  -2.7268080e+00   1.8011735e+01
   1.9538769e+01  -2.1575152e+01   1.5000000e+02  -1.1800484e+00  -2.1162088e+00   1.7845662e+01
   1.9431092e+01  -2.1655351e+01   1.5000000e+02  -7.6033993e-01  -1.5694499e+00   1.7643230e+01
   1.9325865e+01  -2.1738378e+01   1.5000000e+02  -3.3366437e-01  -1.0832789e+00   1.7418517e+01
   1.9223177e+01  -2.1824168e+01   1.5000000e+02   9.7511599e-02  -6.5388314e-01   1.7184749e+01
   1.9123113e+01  -2.1912651e+01   1.5000000e+02   5.3300924e-01  -2.7672737e-01   1.6952755e+01
   1.9025759e+01  -2.2003757e+01   1.5000000e+02   9.7424046e-01   5.3020751e-02   1.6729583e+01
   1.8931196e+01  -2.2097411e+01   1.5000000e+02   1.4229814e+00   3.3968501e-01   1.6518006e+01
   1.8839507e+01  -2.2193539e+01   1.5000000e+02   1.8802584e+00   5.8641694e-01   1.6317204e+01
   1.8750770e+01  -2.2292062e+01   1.5000000e+02   2.3458460e+00   7.9514499e-01   1.6124120e+01
   1.8665063e+01  -2.2392902e+01   1.5000000e+02   2.8184317e+00   9.6727776e-01   1.5934723e+01
   1.8582461e+01  -2.2495976e+01   1.5000000e+02   3.2959889e+00   1.1047779e+00   1.5744494e+01
   1.8503037e+01  -2.2601201e+01   1.5000000e+02   3.7758815e+00   1.2110417e+00   1.5548160e+01
   1.8426863e+01  -2.2708492e+01   1.5000000e+02   4.2544210e+00   1.2910853e+00   1.5339202e+01
   1.8354007e+01  -2.2817760e+01   1.5000000e+02   4.7260917e+00   1.3509623e+00   1.5109782e+01
   1.8284537e+01  -2.2928917e+01   1.5000000e+02   5.1828954e+00   1.3966505e+00   1.4851504e+01
   1.8218518e+01  -2.3041873e+01   1.5000000e+02   5.6141850e+00   1.4327719e+00   1.4556945e+01
   1.8156010e+01  -2.3156533e+01   1.5000000e+02   6.0073250e+00   1.4615398e+00   1.4221695e+01
   1.8097074e+01  -2.3272805e+01   1.5000000e+02   6.3493732e+00   1.4822568e+00   1.3846321e+01
   1.8041768e+01  -2.3390593e+01   1.5000000e+02   6.6295047e+00   1.4916393e+00   1.3437528e+01
   1.7990146e+01  -2.3509799e+01   1.5000000e+02   6.8416821e+00   1.4849486e+00   1.3007826e+01
   1.7942261e+01  -2.3630324e+01   1.5000000e+02   6.9866835e+00   1.4575877e+00   1.2573494e+01
   1.7898162e+01  -2.3752070e+01   1.5000000e+02   7.0727571e+00   1.4066615e+00   1.2151216e+01
   1.7857895e+01  -2.3874935e+01   1.5000000e+02   7.1146166e+00   1.3320125e+00   1.1754264e+01
   1.7821506e+01  -2.3998817e+01   1.5000000e+02   7.1309457e+00   1.2364493e+00   1.1389071e+01
   1.7789035e+01  -2.4123612e+01   1.5000000e+02   7.1407517e+00   1.1252091e+00   1.1053005e+01
   1.7760520e+01  -2.4249215e+01   1.5000000e+02   7.1591620e+00   1.0046922e+00   1.0734003e+01
   1.7735997e+01  -2.4375522e+01   1.5000000e+02   7.1934773e+00   8.8076913e-01   1.0412517e+01
   1.7715499e+01  -2.4502426e+01   1.5000000e+02   7.2406263e+00   7.5707139e-01   1.0065707e+01
   1.7699054e+01  -2.4629820e+01   1.5000000e+02   7.2870878e+00   6.3375071e-01   9.6729382e+00
   1.7686689e+01  -2.4757596e+01   1.5000000e+02   7.3116092e+00   5.0711279e-01   9.2209316e+00
   1.7678427e+01  -2.4885645e+01   1.5000000e+02   7.2898979e+00   3.7033196e-01   8.7068379e+00
   1.7674288e+01  -2.5013859e+01   1.5000000e+02   7.1996455e+00   2.1498634e-01   8.1384279e+00
   1.7674287e+01  -2.5142128e+01   1.5000000e+02   7.0242083e+00   3.3049696e-02   7.5318676e+00
   1.7678438e+01  -2.5270341e+01   1.5000000e+02   6.7541471e+00  -1.8120801e-01   6.9084488e+00
   1.7686750e+01  -2.5398390e+01   1.5000000e+02   6.3869208e+00  -4.2972328e-01   6.2916680e+00
   1.7699230e+01  -2.5526163e+01   1.5000000e+02   5.9258560e+00  -7.0995589e-01   5.7054867e+00
   1.7715881e+01  -2.5653549e+01   1.5000000e+02   5.3794063e+00  -1.0151144e+00   5.1734607e+00
   1.7736700e+01  -2.5780439e+01   1.5000000e+02   4.7612580e+00  -1.3352180e+00   4.7180634e+00
   1.7761684e+01  -2.5906722e+01   1.5000000e+02   4.0910632e+00  -1.6587240e+00   4.3593818e+00
   1.7790825e+01  -2.6032286e+01   1.5000000e+02   3.3948684e+00  -1.9741330e+00   4.1127408e+00
   1.7824110e+01  -2.6157023e+01   1.5000000e+02   2.7042741e+00  -2.2713071e+00   3.9857160e+00
   1.7861523e+01  -2.6280823e+01   1.5000000e+02   2.0539240e+00  -2.5423076e+00   3.9755560e+00
   1.7903046e+01  -2.6403575e+01   1.5000000e+02   1.4775163e+00  -2.7818370e+00   4.0680214e+00
   1.7948655e+01  -2.6525172e+01   1.5000000e+02   1.0032947e+00  -2.9874699e+00   4.2382316e+00
   1.7998322e+01  -2.6645506e+01   1.5000000e+02   6.5017266e-01  -3.1599392e+00   4.4532947e+00
   1.8052016e+01  -2.6764468e+01   1.5000000e+02   4.2520357e-01  -3.3034133e+00   4.6759609e+00
   1.8109704e+01  -2.6881953e+01   1.5000000e+02   3.2274184e-01  -3.4254884e+00   4.8684274e+00
   1.8171344e+01  -2.6997854e+01   1.5000000e+02   3.2519866e-01  -3.5365014e+00   4.9956378e+00
   1.8236896e+01  -2.7112068e+01   1.5000000e+02   4.0497910e-01  -3.6480863e+00   5.0278942e+00
   1.8306311e+01  -2.7224492e+01   1.5000000e+02   5.2733313e-01  -3.7709464e+00   4.9427724e+00
   1.8379539e+01  -2.7335022e+01   1.5000000e+02   6.5365544e-01  -3.9125488e+00   4.7263560e+00
   1.8456526e+01  -2.7443559e+01   1.5000000e+02   7.4483715e-01  -4.0750503e+00   4.3737941e+00
   1.8537213e+01  -2.7550003e+01   1.5000000e+02   7.6408337e-01  -4.2539922e+00   3.8894704e+00
   1.8621536e+01  -2.7654256e+01   1.5000000e+02   6.7907206e-01  -4.4380559e+00   3.2872339e+00
   1.8709430e+01  -2.7756224e+01   1.5000000e+02   4.6370020e-01  -4.6102737e+00   2.5909061e+00
   1.8800824e+01  -2.7855811e+01   1.5000000e+02   9.9943166e-02  -4.7507874e+00   1.8346915e+00
   1.8895644e+01  -2.7952925e+01   1.5000000e+02  -4.2002850e-01  -4.8408877e+00   1.0623615e+00
   1.8993812e+01  -2.8047477e+01   1.5000000e+02  -1.0918824e+00  -4.8674966e+00   3.2438272e-01
   1.9095245e+01  -2.8139378e+01   1.5000000e+02  -1.8981141e+00  -4.8270262e+00  -3.2729909e-01
   1.9199858e+01  -2.8228542e+01   1.5000000e+02  -2.8088520e+00  -4.7276021e+00  -8.4626522e-01
   1.9307562e+01  -2.8314886e+01   1.5000000e+02  -3.7848215e+00  -4.5889875e+00  -1.1990613e+00
   1.9418263e+01  -2.8398328e+01   1.5000000e+02  -4.7823017e+00  -4.4399700e+00  -1.3715233e+00
   1.9531865e+01  -2.8478790e+01   1.5000000e+02  -5.7593854e+00  -4.3133306e+00  -1.3723993e+00
   1.9648269e+01  -2.8556195e+01   1.5000000e+02  -6.6821917e+00  -4.2392008e+00  -1.2328819e+00
   1.9767369e+01  -2.8630471e+01   1.5000000e+02  -7.5295336e+00  -4.2382768e+00  -1.0015037e+00
   1.9889061e+01  -2.8701547e+01   1.5000000e+02  -8.2945889e+00  -4.3170017e+00  -7.3529111e-01
   2.0013234e+01  -2.8769354e+01   1.5000000e+02  -8.9829333e+00  -4.4661575e+00  -4.8953948e-01
   2.0139775e+01  -2.8833829e+01   1.5000000e+02  -9.6077586e+00  -4.6632877e+00  -3.0916825e-01
   2.0268567e+01  -2.8894909e+01   1.5000000e+02  -1.0183907e+01  -4.8778794e+00  -2.2387206e-01
   2.0399494e+01  -2.8952536e+01   1.5000000e+02  -1.0722793e+01  -5.0775338e+00  -2.4747142e-01
   2.0532431e+01  -2.9006654e+01   1.5000000e+02  -1.1229337e+01  -5.2335189e+00  -3.8067896e-01
   2.0667257e+01  -2.9057212e+01   1.5000000e+02  -1.1701359e+01  -5.3246121e+00  -6.1594216e-01
   2.0803844e+01  -2.9104160e+01   1.5000000e+02  -1.2130657e+01  -5.3383616e+00  -9.4290098e-01
   2.0942063e+01  -2.9147453e+01   1.5000000e+02  -1.2505014e+01  -5.2694353e+00  -1.3531928e+00
   2.1081784e+01  -2.9187049e+01   1.5000000e+02  -1.2810202e+01  -5.1152057e+00  -1.8433809e+00
   2.1222873e+01  -2.9222910e+01   1.5000000e+02  -1.3031598e+01  -4.8695413e+00  -2.4147494e+00
   2.1365196e+01  -2.9255000e+01   1.5000000e+02  -1.3155382e+01  -4.5166655e+00  -3.0693159e+00
   2.1508616e+01  -2.9283290e+01   1.5000000e+02  -1.3169295e+01  -4.0275910e+00  -3.8019585e+00
   2.1652996e+01  -2.9307750e+01   1.5000000e+02  -1.3062851e+01  -3.3616030e+00  -4.5906673e+00
   2.1798196e+01  -2.9328358e+01   1.5000000e+02  -1.2827058e+01  -2.4741425e+00  -5.3876917e+00
   2.1944077e+01  -2.9345093e+01   1.5000000e+02  -1.2454088e+01  -1.3301435e+00  -6.1161449e+00
   2.2090497e+01  -2.9357939e+01   1.5000000e+02  -1.1937990e+01   8.0413291e-02  -6.6746429e+00
   2.2237314e+01  -2.9366883e+01   1.5000000e+02  -1.1277246e+01   1.7296733e+00  -6.9509551e+00
   2.2384387e+01  -2.9371917e+01   1.5000000e+02  -1.0479021e+01   3.5464754e+00  -6.8421703e+00
   2.2531571e+01  -2.9373035e+01   1.5000000e+02  -9.5634448e+00   5.4213998e+00  -6.2767769e+00
   2.2678725e+01  -2.9370237e+01   1.5000000e+02  -8.5653902e+00   7.2226782e+00  -5.2322539e+00
   2.2825705e+01  -2.9363525e+01   1.5000000e+02  -7.5321159e+00   8.8190749e+00  -3.7423936e+00
   2.2972370e+01  -2.9352906e+01   1.5000000e+02  -6.5168583e+00   1.0103032e+01  -1.8912083e+00
   2.3118576e+01  -2.9338390e+01   1.5000000e+02  -5.5705613e+00   1.1006477e+01   2.0415662e-01
   2.3264182e+01  -2.9319991e+01   1.5000000e+02  -4.7342902e+00   1.1505385e+01   2.4152631e+00
   2.3409047e+01  -2.9297728e+01   1.5000000e+02  -4.0343650e+00   1.1614027e+01   4.6213439e+00
   2.3553033e+01  -2.9271622e+01   1.5000000e+02  -3.4807250e+00   1.1373929e+01   6.7211619e+00
   2.3695999e+01  -2.9241698e+01   1.5000000e+02  -3.0682088e+00   1.0842744e+01   8.6374509e+00
   2.3837809e+01  -2.9207986e+01   1.5000000e+02  -2.7798276e+00   1.0085938e+01   1.0317051e+01
   2.3978328e+01  -2.9170519e+01   1.5000000e+02  -2.5912917e+00   9.1712825e+00   1.1729344e+01
   2.4117420e+01  -2.9129332e+01   1.5000000e+02  -2.4758944e+00   8.1646048e+00   1.2864508e+01
   2.4254955e+01  -2.9084465e+01   1.5000000e+02  -2.4089544e+00   7.1255987e+00   1.3731206e+01
   2.4390802e+01  -2.9035963e+01   1.5000000e+02  -2.3712026e+00   6.1040695e+00   1.4352753e+01
   2.4524833e+01  -2.8983872e+01   1.5000000e+02  -2.3505239e+00   5.1374130e+00   1.4761961e+01
   2.4656923e+01  -2.8928242e+01   1.5000000e+02  -2.3418063e+00   4.2501866e+00   1.4995538e+01
   2.4786949e+01  -2.8869127e+01   1.5000000e+02  -2.3452196e+00   3.4556900e+00   1.5089511e+01
   2.4914790e+01  -2.8806583e+01   1.5000000e+02  -2.3636876e+00   2.7586639e+00   1.5076625e+01
   2.5040329e+01  -2.8740671e+01   1.5000000e+02  -2.4005368e+00   2.1579786e+00   1.4985713e+01
   2.5163451e+01  -2.8671454e+01   1.5000000e+02  -2.4582724e+00   1.6485956e+00   1.4842235e+01
   2.5837641e+01  -2.8373015e+01   1.5000000e+02  -2.4310377e+00  -4.9790536e-01   1.3643660e+01
   2.5944205e+01  -2.8285289e+01   1.5000000e+02  -2.6691593e+00  -6.8375640e-01   1.3508926e+01
   2.6047713e+01  -2.8194849e+01   1.5000000e+02  -2.9301492e+00  -8.5552954e-01   1.3351287e+01
   2.6148081e+01  -2.8101775e+01   1.5000000e+02  -3.2041145e+00  -1.0020008e+00   1.3153333e+01
   2.6245230e+01  -2.8006149e+01   1.5000000e+02  -3.4781321e+00  -1.1058774e+00   1.2905771e+01
   2.6339083e+01  -2.7908057e+01   1.5000000e+02  -3.7397032e+00  -1.1487441e+00   1.2610418e+01
   2.6429569e+01  -2.7807585e+01   1.5000000e+02  -3.9804859e+00  -1.1159838e+00   1.2279809e+01
   2.6516617e+01  -2.7704820e+01   1.5000000e+02  -4.1994132e+00  -1.0002356e+00   1.1934121e+01
   2.6600162e+01  -2.7599852e+01   1.5000000e+02  -4.4046553e+00  -8.0300987e-01   1.1596270e+01
   2.6680143e+01  -2.7492774e+01   1.5000000e+02  -4.6139332e+00  -5.3453838e-01   1.1285883e+01
   2.6756501e+01  -2.7383677e+01   1.5000000e+02  -4.8523902e+00  -2.1210213e-01   1.1012875e+01
   2.6829181e+01  -2.7272657e+01   1.5000000e+02  -5.1473828e+00   1.4289778e-01   1.0772213e+01
   2.6898132e+01  -2.7159809e+01   1.5000000e+02  -5.5208892e+00   5.0886764e-01   1.0542003e+01
   2.6963308e+01  -2.7045230e+01   1.5000000e+02  -5.9815006e+00   8.6798086e-01   1.0286740e+01
   2.7024665e+01  -2.6929018e+01   1.5000000e+02  -6.5191439e+00   1.2090121e+00   9.9657221e+00
   2.7082162e+01  -2.6811273e+01   1.5000000e+02  -7.1050904e+00   1.5279506e+00   9.5441947e+00
   2.7135765e+01  -2.6692094e+01   1.5000000e+02  -7.6979036e+00   1.8261714e+00   9.0030779e+00
   2.7185439e+01  -2.6571583e+01   1.5000000e+02  -8.2532411e+00   2.1070138e+00   8.3434079e+00
   2.7231156e+01  -2.6449842e+01   1.5000000e+02  -8.7337500e+00   2.3724324e+00   7.5840236e+00
   2.7272890e+01  -2.6326972e+01   1.5000000e+02  -9.1156175e+00   2.6212290e+00   6.7541127e+00
   2.7310620e+01  -2.6203078e+01   1.5000000e+02  -9.3902166e+00   2.8493993e+00   5.8841520e+00
   2.7344327e+01  -2.6078262e+01   1.5000000e+02  -9.5614658e+00   3.0520593e+00   4.9983194e+00
   2.7373997e+01  -2.5952629e+01   1.5000000e+02  -9.6403381e+00   3.2257185e+00   4.1105551e+00
   2.7399618e+01  -2.5826283e+01   1.5000000e+02  -9.6384366e+00   3.3698525e+00   3.2248066e+00
   2.7421182e+01  -2.5699329e+01   1.5000000e+02  -9.5625834e+00   3.4871640e+00   2.3393876e+00
   2.7438684e+01  -2.5571871e+01   1.5000000e+02  -9.4124932e+00   3.5825918e+00   1.4539315e+00
   2.7452124e+01  -2.5444014e+01   1.5000000e+02  -9.1827542e+00   3.6616687e+00   5.7629424e-01
   2.7461504e+01  -2.5315862e+01   1.5000000e+02  -8.8684832e+00   3.7291662e+00  -2.7386391e-01
   2.7466828e+01  -2.5187521e+01   1.5000000e+02  -8.4720305e+00   3.7888467e+00  -1.0666746e+00
   2.7468106e+01  -2.5059095e+01   1.5000000e+02  -8.0074432e+00   3.8445249e+00  -1.7683391e+00
   2.7465348e+01  -2.4930688e+01   1.5000000e+02  -7.5007727e+00   3.9016739e+00  -2.3492607e+00
   2.7458571e+01  -2.4802405e+01   1.5000000e+02  -6.9865810e+00   3.9683713e+00  -2.7908289e+00
   2.7447792e+01  -2.4674347e+01   1.5000000e+02  -6.5026461e+00   4.0544551e+00  -3.0891557e+00
   2.7433031e+01  -2.4546619e+01   1.5000000e+02  -6.0849420e+00   4.1688301e+00  -3.2557933e+00
   2.7414313e+01  -2.4419322e+01   1.5000000e+02  -5.7635379e+00   4.3157740e+00  -3.3167417e+00
   2.7391663e+01  -2.4292559e+01   1.5000000e+02  -5.5590652e+00   4.4915103e+00  -3.3105248e+00
   2.7365113e+01  -2.4166431e+01   1.5000000e+02  -5.4789301e+00   4.6823735e+00  -3.2850755e+00
   2.7334694e+01  -2.4041037e+01   1.5000000e+02  -5.5135566e+00   4.8651300e+00  -3.2925104e+00
   2.7300442e+01  -2.3916477e+01   1.5000000e+02  -5.6340203e+00   5.0098273e+00  -3.3810897e+00
   2.7262393e+01  -2.3792850e+01   1.5000000e+02  -5.7933402e+00   5.0847754e+00  -3.5851591e+00
   2.7220590e+01  -2.3670253e+01   1.5000000e+02  -5.9332239e+00   5.0628262e+00  -3.9155262e+00
   2.7175073e+01  -2.3548782e+01   1.5000000e+02  -5.9963183e+00   4.9272232e+00  -4.3542647e+00
   2.7125890e+01  -2.3428533e+01   1.5000000e+02  -5.9410552e+00   4.6753317e+00  -4.8572463e+00
   2.7073088e+01  -2.3309600e+01   1.5000000e+02  -5.7538706e+00   4.3187465e+00  -5.3655609e+00
   2.7016717e+01  -2.3192075e+01   1.5000000e+02  -5.4534621e+00   3.8797993e+00  -5.8225338e+00
   2.6956831e+01  -2.3076050e+01   1.5000000e+02  -5.0848315e+00   3.3856178e+00  -6.1903383e+00
   2.6893483e+01  -2.2961615e+01   1.5000000e+02  -4.7052416e+00   2.8615822e+00  -6.4601192e+00
   2.6826733e+01  -2.2848859e+01   1.5000000e+02  -4.3674416e+00   2.3259247e+00  -6.6523588e+00
   2.6756638e+01  -2.2737870e+01   1.5000000e+02  -4.1056538e+00   1.7864739e+00  -6.8083005e+00
   2.6683260e+01  -2.2628732e+01   1.5000000e+02  -3.9281455e+00   1.2401353e+00  -6.9756629e+00
   2.6606664e+01  -2.2521530e+01   1.5000000e+02  -3.8175414e+00   6.7521816e-01  -7.1933212e+00
   2.6526914e+01  -2.2416347e+01   1.5000000e+02  -3.7379874e+00   7.6152368e-02  -7.4793751e+00
   2.6444079e+01  -2.2313262e+01   1.5000000e+02  -3.6465782e+00  -5.7055721e-01  -7.8259991e+00
   2.6358228e+01  -2.2212356e+01   1.5000000e+02  -3.5052092e+00  -1.2710321e+00  -8.2023187e+00
   2.6269433e+01  -2.2113705e+01   1.5000000e+02  -3.2893100e+00  -2.0212331e+00  -8.5636817e+00
   2.6177765e+01  -2.2017385e+01   1.5000000e+02  -2.9911827e+00  -2.8074848e+00  -8.8634863e+00
   2.6083302e+01  -2.1923469e+01   1.5000000e+02  -2.6181124e+00  -3.6098077e+00  -9.0633155e+00
   2.5986118e+01  -2.1832028e+01   1.5000000e+02  -2.1869906e+00  -4.4065410e+00  -9.1384319e+00
   2.5886293e+01  -2.1743133e+01   1.5000000e+02  -1.7182220e+00  -5.1782889e+00  -9.0780229e+00
   2.5783907e+01  -2.1656850e+01   1.5000000e+02  -1.2308888e+00  -5.9100297e+00  -8.8815184e+00
   2.5679040e+01  -2.1573246e+01   1.5000000e+02  -7.4036052e-01  -6.5907380e+00  -8.5532942e+00
   2.5571775e+01  -2.1492382e+01   1.5000000e+02  -2.5836805e-01  -7.2110168e+00  -8.0982441e+00
   2.5462197e+01  -2.1414322e+01   1.5000000e+02   2.0516919e-01  -7.7596921e+00  -7.5198965e+00
   2.5350392e+01  -2.1339122e+01   1.5000000e+02   6.3964797e-01  -8.2210150e+00  -6.8218977e+00
   2.5236446e+01  -2.1266841e+01   1.5000000e+02   1.0317624e+00  -8.5738455e+00  -6.0122745e+00
   2.5120447e+01  -2.1197533e+01   1.5000000e+02   1.3649419e+00  -8.7939366e+00  -5.1088079e+00
   2.5002485e+01  -2.1131250e+01   1.5000000e+02   1.6206573e+00  -8.8590479e+00  -4.1430899e+00
   2.4882651e+01  -2.1068041e+01   1.5000000e+02   1.7812653e+00  -8.7555881e+00  -3.1612261e+00
   2.4761035e+01  -2.1007955e+01   1.5000000e+02   1.8334289e+00  -8.4847707e+00  -2.2202896e+00
   2.4637732e+01  -2.0951037e+01   1.5000000e+02   1.7709756e+00  -8.0664438e+00  -1.3810467e+00
   2.4512833e+01  -2.0897328e+01   1.5000000e+02   1.5963424e+00  -7.5391959e+00  -6.9839794e-01
   2.4386435e+01  -2.0846871e+01   1.5000000e+02   1.3202359e+00  -6.9563227e+00  -2.1204304e-01
   2.4258631e+01  -2.0799701e+01   1.5000000e+02   9.5960266e-01  -6.3780407e+00   6.0294040e-02
   2.4129519e+01  -2.0755855e+01   1.5000000e+02   5.3461809e-01  -5.8620250e+00   1.2468654e-01
   2.3999195e+01  -2.0715366e+01   1.5000000e+02   6.5554974e-02  -5.4549676e+00   7.5232277e-03
   2.3867758e+01  -2.0678263e+01   1.5000000e+02  -4.2945257e-01  -5.1878597e+00  -2.5181192e-01
   2.3735304e+01  -2.0644575e+01   1.5000000e+02  -9.3533556e-01  -5.0758801e+00  -6.0907082e-01
   2.3601934e+01  -2.0614326e+01   1.5000000e+02  -1.4398658e+00  -5.1218198e+00  -1.0212355e+00
   2.3467746e+01  -2.0587540e+01   1.5000000e+02  -1.9328904e+00  -5.3208260e+00  -1.4493201e+00
   2.3332841e+01  -2.0564237e+01   1.5000000e+02  -2.4055746e+00  -5.6642624e+00  -1.8582328e+00
   2.3197319e+01  -2.0544433e+01   1.5000000e+02  -2.8499974e+00  -6.1415910e+00  -2.2152085e+00
   2.3061279e+01  -2.0528143e+01   1.5000000e+02  -3.2591348e+00  -6.7402513e+00  -2.4883247e+00
   2.2924824e+01  -2.0515380e+01   1.5000000e+02  -3.6272047e+00  -7.4442701e+00  -2.6462116e+00
   2.2788054e+01  -2.0506154e+01   1.5000000e+02  -3.9503169e+00  -8.2328311e+00  -2.6593642e+00
   2.2651071e+01  -2.0500470e+01   1.5000000e+02  -4.2271646e+00  -9.0797501e+00  -2.5026828e+00
   2.2513977e+01  -2.0498334e+01   1.5000000e+02  -4.4594542e+00  -9.9545755e+00  -2.1582513e+00
   2.2376871e+01  -2.0499747e+01   1.5000000e+02  -4.6516864e+00  -1.0825056e+01  -1.6171513e+00
   2.2239857e+01  -2.0504707e+01   1.5000000e+02  -4.8100839e+00  -1.1659905e+01  -8.7937024e-01
   2.2103036e+01  -2.0513212e+01   1.5000000e+02  -4.9409432e+00  -1.2430620e+01   4.8158926e-02
   2.1966508e+01  -2.0525255e+01   1.5000000e+02  -5.0489196e+00  -1.3111283e+01   1.1540476e+00
   2.1830376e+01  -2.0540826e+01   1.5000000e+02  -5.1358387e+00  -1.3676736e+01   2.4238367e+00
   2.1694740e+01  -2.0559915e+01   1.5000000e+02  -5.2003969e+00  -1.4100606e+01   3.8392543e+00
   2.1559701e+01  -2.0582506e+01   1.5000000e+02  -5.2387887e+00  -1.4354927e+01   5.3753958e+00
   2.1425359e+01  -2.0608584e+01   1.5000000e+02  -5.2460305e+00  -1.4412592e+01   6.9976034e+00
   2.1291814e+01  -2.0638128e+01   1.5000000e+02  -5.2176119e+00  -1.4252377e+01   8.6599758e+00
   2.1159165e+01  -2.0671117e+01   1.5000000e+02  -5.1509802e+00  -1.3864992e+01   1.0307234e+01
   2.1027513e+01  -2.0707526e+01   1.5000000e+02  -5.0464702e+00  -1.3257890e+01   1.1880018e+01
   2.0896954e+01  -2.0747327e+01   1.5000000e+02  -4.9073727e+00  -1.2456828e+01   1.3322566e+01
   2.0767587e+01  -2.0790492e+01   1.5000000e+02  -4.7390665e+00  -1.1503488e+01   1.4590248e+01
   2.0639509e+01  -2.0836986e+01   1.5000000e+02  -4.5474447e+00  -1.0449661e+01   1.5655085e+01
   2.0512816e+01  -2.0886777e+01   1.5000000e+02  -4.3370178e+00  -9.3496786e+00   1.6507707e+01
   2.0387604e+01  -2.0939826e+01   1.5000000e+02  -4.1094645e+00  -8.2530669e+00   1.7155617e+01
   2.0263968e+01  -2.0996093e+01   1.5000000e+02  -3.8631005e+00  -7.1990153e+00   1.7618691e+01
   2.0142001e+01  -2.1055537e+01   1.5000000e+02  -3.5935913e+00  -6.2136472e+00   1.7923365e+01
   2.0021796e+01  -2.1118113e+01   1.5000000e+02  -3.2956689e+00  -5.3102574e+00   1.8097130e+01
   1.9903445e+01  -2.1183773e+01   1.5000000e+02  -2.9651947e+00  -4.4918437e+00   1.8164639e+01
   1.9787039e+01  -2.1252469e+01   1.5000000e+02  -2.6008452e+00  -3.7548247e+00   1.8145986e+01
   1.9672667e+01  -2.1324148e+01   1.5000000e+02  -2.2049334e+00  -3.0926848e+00   1.8057000e+01
   1.9560418e+01  -2.1398757e+01   1.5000000e+02  -1.7831315e+00  -2.4986283e+00   1.7910783e+01
   1.9450379e+01  -2.1476239e+01   1.5000000e+02  -1.3433481e+00  -1.9668323e+00   1.7719539e+01
   1.9342636e+01  -2.1556536e+01   1.5000000e+02  -8.9407665e-01  -1.4924776e+00   1.7495840e+01
   1.9237273e+01  -2.1639587e+01   1.5000000e+02  -4.4271743e-01  -1.0710559e+00   1.7252849e+01
   1.9134374e+01  -2.1725329e+01   1.5000000e+02   5.6866100e-03  -6.9761832e-01   1.7003418e+01
   1.9034020e+01  -2.1813697e+01   1.5000000e+02   4.4891929e-01  -3.6650555e-01   1.6758475e+01
   1.8936292e+01  -2.1904624e+01   1.5000000e+02   8.8713537e-01  -7.1815008e-02   1.6525500e+01
   1.8841268e+01  -2.1998041e+01   1.5000000e+02   1.3217862e+00   1.9164632e-01   1.6307867e+01
   1.8749024e+01  -2.2093877e+01   1.5000000e+02   1.7545122e+00   4.2748788e-01   1.6105418e+01
   1.8659637e+01  -2.2192059e+01   1.5000000e+02   2.1865672e+00   6.3754509e-01   1.5915831e+01
   1.8573180e+01  -2.2292512e+01   1.5000000e+02   2.6189136e+00   8.2258440e-01   1.5735905e+01
   1.8489724e+01  -2.2395159e+01   1.5000000e+02   3.0525479e+00   9.8354798e-01   1.5561963e+01
   1.8409340e+01  -2.2499921e+01   1.5000000e+02   3.4884705e+00   1.1226478e+00   1.5389302e+01
   1.8332096e+01  -2.2606718e+01   1.5000000e+02   3.9269912e+00   1.2437229e+00   1.5211281e+01
   1.8258057e+01  -2.2715467e+01   1.5000000e+02   4.3665264e+00   1.3517193e+00   1.5018900e+01
   1.8187288e+01  -2.2826087e+01   1.5000000e+02   4.8024117e+00   1.4515728e+00   1.4801371e+01
   1.8119850e+01  -2.2938489e+01   1.5000000e+02   5.2261455e+00   1.5468964e+00   1.4547741e+01
   1.8055804e+01  -2.3052589e+01   1.5000000e+02   5.6255779e+00   1.6388640e+00   1.4249282e+01
   1.7995208e+01  -2.3168297e+01   1.5000000e+02   5.9861707e+00   1.7256264e+00   1.3902162e+01
   1.7938116e+01  -2.3285523e+01   1.5000000e+02   6.2935111e+00   1.8025721e+00   1.3509531e+01
   1.7884582e+01  -2.3404177e+01   1.5000000e+02   6.5365452e+00   1.8634909e+00   1.3082123e+01
   1.7834657e+01  -2.3524166e+01   1.5000000e+02   6.7106081e+00   1.9023687e+00   1.2636791e+01
   1.7788390e+01  -2.3645395e+01   1.5000000e+02   6.8192399e+00   1.9152033e+00   1.2193163e+01
   1.7745825e+01  -2.3767771e+01   1.5000000e+02   6.8741550e+00   1.9012484e+00   1.1769278e+01
   1.7707008e+01  -2.3891196e+01   1.5000000e+02   6.8933667e+00   1.8633227e+00   1.1377411e+01
   1.7671979e+01  -2.4015573e+01   1.5000000e+02   6.8978529e+00   1.8072173e+00   1.1020845e+01
   1.7640775e+01  -2.4140805e+01   1.5000000e+02   6.9072601e+00   1.7403309e+00   1.0692381e+01
   1.7613434e+01  -2.4266792e+01   1.5000000e+02   6.9352903e+00   1.6698269e+00   1.0375097e+01
   1.7589987e+01  -2.4393434e+01   1.5000000e+02   6.9857633e+00   1.6007159e+00   1.0045621e+01
   1.7570465e+01  -2.4520629e+01   1.5000000e+02   7.0506971e+00   1.5342479e+00   9.6795968e+00
   1.7554895e+01  -2.4648278e+01   1.5000000e+02   7.1113640e+00   1.4671827e+00   9.2578593e+00
   1.7543302e+01  -2.4776277e+01   1.5000000e+02   7.1422936e+00   1.3921640e+00   8.7714444e+00
   1.7535707e+01  -2.4904523e+01   1.5000000e+02   7.1169594e+00   1.2991361e+00   8.2236999e+00
   1.7532129e+01  -2.5032913e+01   1.5000000e+02   7.0132001e+00   1.1774166e+00   7.6291330e+00
   1.7532583e+01  -2.5161344e+01   1.5000000e+02   6.8167127e+00   1.0179693e+00   7.0098638e+00
   1.7537082e+01  -2.5289710e+01   1.5000000e+02   6.5220187e+00   8.1537413e-01   6.3913966e+00
   1.7545634e+01  -2.5417909e+01   1.5000000e+02   6.1313908e+00   5.6914159e-01   5.7991385e+00
   1.7558246e+01  -2.5545834e+01   1.5000000e+02   5.6530248e+00   2.8405248e-01   5.2565642e+00
   1.7574920e+01  -2.5673382e+01   1.5000000e+02   5.0995667e+00  -3.0512398e-02   4.7845905e+00
   1.7595657e+01  -2.5800448e+01   1.5000000e+02   4.4877610e+00  -3.6212650e-01   4.4014861e+00
   1.7620451e+01  -2.5926927e+01   1.5000000e+02   3.8389354e+00  -6.9724530e-01   4.1221360e+00
   1.7649296e+01  -2.6052713e+01   1.5000000e+02   3.1794825e+00  -1.0231256e+00   3.9562380e+00
   1.7682181e+01  -2.6177704e+01   1.5000000e+02   2.5401697e+00  -1.3291649e+00   3.9056787e+00
   1.7719093e+01  -2.6301795e+01   1.5000000e+02   1.9537969e+00  -1.6075981e+00   3.9622175e+00
   1.7760012e+01  -2.6424881e+01   1.5000000e+02   1.4513037e+00  -1.8535814e+00   4.1065871e+00
   1.7804919e+01  -2.6546861e+01   1.5000000e+02   1.0573258e+00  -2.0650662e+00   4.3097354e+00
   1.7853789e+01  -2.6667631e+01   1.5000000e+02   7.8638518e-01  -2.2426336e+00   4.5360232e+00
   1.7906593e+01  -2.6787090e+01   1.5000000e+02   6.4056610e-01  -2.3896073e+00   4.7476165e+00
   1.7963299e+01  -2.6905135e+01   1.5000000e+02   6.0919313e-01  -2.5122573e+00   4.9089118e+00
   1.8023872e+01  -2.7021668e+01   1.5000000e+02   6.7034506e-01  -2.6196624e+00   4.9900478e+00
   1.8088273e+01  -2.7136588e+01   1.5000000e+02   7.9365566e-01  -2.7228593e+00   4.9689858e+00
   1.8156458e+01  -2.7249797e+01   1.5000000e+02   9.4372242e-01  -2.8331643e+00   4.8322503e+00
   1.8228383e+01  -2.7361197e+01   1.5000000e+02   1.0835071e+00  -2.9600789e+00   4.5746422e+00
   1.8303995e+01  -2.7470694e+01   1.5000000e+02   1.1773197e+00  -3.1091410e+00   4.1982872e+00
   1.8383241e+01  -2.7578191e+01   1.5000000e+02   1.1929181e+00  -3.2803381e+00   3.7115842e+00
   1.8466065e+01  -2.7683597e+01   1.5000000e+02   1.1027789e+00  -3.4671503e+00   3.1285630e+00
   1.8552404e+01  -2.7786818e+01   1.5000000e+02   8.8484413e-01  -3.6567046e+00   2.4692769e+00
   1.8642194e+01  -2.7887765e+01   1.5000000e+02   5.2346186e-01  -3.8313511e+00   1.7608545e+00
   1.8735367e+01  -2.7986350e+01   1.5000000e+02   1.0977350e-02  -3.9716881e+00   1.0383443e+00
   1.8831850e+01  -2.8082485e+01   1.5000000e+02  -6.5022062e-01  -4.0606093e+00   3.4397788e-01
   1.8931569e+01  -2.8176085e+01   1.5000000e+02  -1.4460691e+00  -4.0874648e+00  -2.7599386e-01
   1.9034443e+01  -2.8267069e+01   1.5000000e+02  -2.3505651e+00  -4.0512494e+00  -7.7669048e-01
   1.9140391e+01  -2.8355355e+01   1.5000000e+02  -3.3275561e+00  -3.9621093e+00  -1.1212233e+00
   1.9249326e+01  -2.8440864e+01   1.5000000e+02  -4.3346516e+00  -3.8405656e+00  -1.2871582e+00
   1.9361160e+01  -2.8523521e+01   1.5000000e+02  -5.3287461e+00  -3.7145026e+00  -1.2712783e+00
   1.9475799e+01  -2.8603251e+01   1.5000000e+02  -6.2720525e+00  -3.6141930e+00  -1.0913842e+00
   1.9593148e+01  -2.8679982e+01   1.5000000e+02  -7.1374939e+00  -3.5662204e+00  -7.8427006e-01
   1.9713108e+01  -2.8753646e+01   1.5000000e+02  -7.9119228e+00  -3.5877839e+00  -3.9982362e-01
   1.9835577e+01  -2.8824176e+01   1.5000000e+02  -8.5962084e+00  -3.6831353e+00   7.4510510e-03
   1.9960450e+01  -2.8891508e+01   1.5000000e+02  -9.2021750e+00  -3.8432148e+00   3.8715961e-01
   2.0087619e+01  -2.8955581e+01   1.5000000e+02  -9.7474416e+00  -4.0483813e+00   6.9953442e-01
   2.0216974e+01  -2.9016337e+01   1.5000000e+02  -1.0249929e+01  -4.2730055e+00   9.1841883e-01
   2.0348402e+01  -2.9073720e+01   1.5000000e+02  -1.0723591e+01  -4.4904098e+00   1.0308817e+00
   2.0481786e+01  -2.9127678e+01   1.5000000e+02  -1.1176157e+01  -4.6770457e+00   1.0345677e+00
   2.0617009e+01  -2.9178162e+01   1.5000000e+02  -1.1608768e+01  -4.8153402e+00   9.3383234e-01
   2.0753950e+01  -2.9225125e+01   1.5000000e+02  -1.2016814e+01  -4.8947515e+00   7.3550931e-01
   2.0892486e+01  -2.9268524e+01   1.5000000e+02  -1.2391242e+01  -4.9106616e+00   4.4491786e-01
   2.1032494e+01  -2.9308319e+01   1.5000000e+02  -1.2719832e+01  -4.8608686e+00   6.2905759e-02
   2.1173847e+01  -2.9344474e+01   1.5000000e+02  -1.2988320e+01  -4.7400626e+00  -4.1473982e-01
   2.1316416e+01  -2.9376955e+01   1.5000000e+02  -1.3181452e+01  -4.5337591e+00  -9.9437665e-01
   2.1460072e+01  -2.9405732e+01   1.5000000e+02  -1.3283869e+01  -4.2141043e+00  -1.6775493e+00
   2.1604683e+01  -2.9430779e+01   1.5000000e+02  -1.3280544e+01  -3.7402613e+00  -2.4513374e+00
   2.1750119e+01  -2.9452072e+01   1.5000000e+02  -1.3156686e+01  -3.0649013e+00  -3.2792788e+00
   2.1896245e+01  -2.9469592e+01   1.5000000e+02  -1.2897561e+01  -2.1461760e+00  -4.0965396e+00
   2.2042927e+01  -2.9483322e+01   1.5000000e+02  -1.2489221e+01  -9.6204018e-01  -4.8125772e+00
   2.2190030e+01  -2.9493249e+01   1.5000000e+02  -1.1921087e+01   4.7722140e-01  -5.3214836e+00
   2.2337419e+01  -2.9499366e+01   1.5000000e+02  -1.1190449e+01   2.1221406e+00  -5.5183055e+00
   2.2484958e+01  -2.9501665e+01   1.5000000e+02  -1.0307585e+01   3.8853999e+00  -5.3180345e+00
   2.2632511e+01  -2.9500144e+01   1.5000000e+02  -9.2992713e+00   5.6520244e+00  -4.6727539e+00
   2.2779941e+01  -2.9494806e+01   1.5000000e+02  -8.2085366e+00   7.2969865e+00  -3.5826101e+00
   2.2927114e+01  -2.9485655e+01   1.5000000e+02  -7.0898877e+00   8.7060011e+00  -2.0967177e+00
   2.3073893e+01  -2.9472699e+01   1.5000000e+02  -6.0013523e+00   9.7930818e+00  -3.0339853e-01
   2.3220143e+01  -2.9455950e+01   1.5000000e+02  -4.9956183e+00   1.0509941e+01   1.6867477e+00
   2.3365730e+01  -2.9435425e+01   1.5000000e+02  -4.1128544e+00   1.0845623e+01   3.7586765e+00
   2.3510521e+01  -2.9411142e+01   1.5000000e+02  -3.3766306e+00   1.0819392e+01   5.8063960e+00
   2.3654382e+01  -2.9383123e+01   1.5000000e+02  -2.7932495e+00   1.0471561e+01   7.7402942e+00
   2.3797183e+01  -2.9351395e+01   1.5000000e+02  -2.3538997e+00   9.8559121e+00   9.4899899e+00
   2.3938794e+01  -2.9315986e+01   1.5000000e+02  -2.0388211e+00   9.0344596e+00   1.1005237e+01
   2.4079086e+01  -2.9276930e+01   1.5000000e+02  -1.8223599e+00   8.0732273e+00   1.2256589e+01
   2.4217933e+01  -2.9234263e+01   1.5000000e+02  -1.6780620e+00   7.0376955e+00   1.3235523e+01
   2.4355209e+01  -2.9188023e+01   1.5000000e+02  -1.5829796e+00   5.9877592e+00   1.3952835e+01
   2.4490792e+01  -2.9138253e+01   1.5000000e+02  -1.5205178e+00   4.9731047e+00   1.4434776e+01
   2.4624561e+01  -2.9085000e+01   1.5000000e+02  -1.4814898e+00   4.0303498e+00   1.4717415e+01
   2.4756397e+01  -2.9028311e+01   1.5000000e+02  -1.4632957e+00   3.1824544e+00   1.4840624e+01
   2.4886184e+01  -2.8968238e+01   1.5000000e+02  -1.4675784e+00   2.4401502e+00   1.4843096e+01
   2.5013808e+01  -2.8904837e+01   1.5000000e+02  -1.4973160e+00   1.8046219e+00   1.4759334e+01
   2.5139158e+01  -2.8838164e+01   1.5000000e+02  -1.5544180e+00   1.2704393e+00   1.4618695e+01
   2.5262125e+01  -2.8768281e+01   1.5000000e+02  -1.6386376e+00   8.2795439e-01   1.4445826e+01
   2.5382605e+01  -2.8695251e+01   1.5000000e+02  -1.7481748e+00   4.6477903e-01   1.4261425e+01
   2.5500495e+01  -2.8619139e+01   1.5000000e+02  -1.8813549e+00   1.6644715e-01   1.4082159e+01
   2.5615694e+01  -2.8540015e+01   1.5000000e+02  -2.0381950e+00  -8.3087217e-02   1.3919098e+01
   2.5728107e+01  -2.8457949e+01   1.5000000e+02  -2.2206623e+00  -3.0003977e-01   1.3775208e+01
   2.6355445e+01  -2.8089973e+01   1.5000000e+02  -2.7929960e+00  -1.7455352e+00   1.2666566e+01
   2.6449408e+01  -2.7991713e+01   1.5000000e+02  -3.0177229e+00  -1.8100028e+00   1.2401865e+01
   2.6540080e+01  -2.7891132e+01   1.5000000e+02  -3.2200102e+00  -1.7916304e+00   1.2105293e+01
   2.6627397e+01  -2.7788315e+01   1.5000000e+02  -3.4015094e+00  -1.6806728e+00   1.1798190e+01
   2.6711295e+01  -2.7683346e+01   1.5000000e+02  -3.5719849e+00  -1.4769958e+00   1.1504376e+01
   2.6791717e+01  -2.7576312e+01   1.5000000e+02  -3.7496012e+00  -1.1901561e+00   1.1244888e+01
   2.6868606e+01  -2.7467302e+01   1.5000000e+02  -3.9595477e+00  -8.3794405e-01   1.1032102e+01
   2.6941911e+01  -2.7356404e+01   1.5000000e+02  -4.2300385e+00  -4.4346994e-01   1.0864233e+01
   2.7011584e+01  -2.7243711e+01   1.5000000e+02  -4.5856616e+00  -3.1044007e-02   1.0722349e+01
   2.7077579e+01  -2.7129314e+01   1.5000000e+02  -5.0396013e+00   3.7835272e-01   1.0572037e+01
   2.7139855e+01  -2.7013306e+01   1.5000000e+02  -5.5873765e+00   7.7051125e-01   1.0370478e+01
   2.7198373e+01  -2.6895781e+01   1.5000000e+02  -6.2051201e+00   1.1391599e+00   1.0077266e+01
   2.7253098e+01  -2.6776834e+01   1.5000000e+02  -6.8537055e+00   1.4843778e+00   9.6650989e+00
   2.7303999e+01  -2.6656561e+01   1.5000000e+02  -7.4875460e+00   1.8091058e+00   9.1261296e+00
   2.7351048e+01  -2.6535059e+01   1.5000000e+02  -8.0646671e+00   2.1155206e+00   8.4716714e+00
   2.7394220e+01  -2.6412423e+01   1.5000000e+02  -8.5543382e+00   2.4030099e+00   7.7261277e+00
   2.7433492e+01  -2.6288753e+01   1.5000000e+02  -8.9401579e+00   2.6684340e+00   6.9184723e+00
   2.7468848e+01  -2.6164146e+01   1.5000000e+02  -9.2188894e+00   2.9081710e+00   6.0745311e+00
   2.7500273e+01  -2.6038700e+01   1.5000000e+02  -9.3963816e+00   3.1205642e+00   5.2122286e+00
   2.7527753e+01  -2.5912516e+01   1.5000000e+02  -9.4821861e+00   3.3075354e+00   4.3403958e+00
   2.7551281e+01  -2.5785691e+01   1.5000000e+02  -9.4843013e+00   3.4746561e+00   3.4610050e+00
   2.7570851e+01  -2.5658325e+01   1.5000000e+02  -9.4056087e+00   3.6296284e+00   2.5742562e+00
   2.7586461e+01  -2.5530518e+01   1.5000000e+02  -9.2434530e+00   3.7798365e+00   1.6847564e+00
   2.7598111e+01  -2.5402369e+01   1.5000000e+02  -8.9927808e+00   3.9300127e+00   8.0633325e-01
   2.7605805e+01  -2.5273977e+01   1.5000000e+02  -8.6515292e+00   4.0811497e+00  -3.6741480e-02
   2.7609551e+01  -2.5145441e+01   1.5000000e+02  -8.2257424e+00   4.2312807e+00  -8.1278979e-01
   2.7609357e+01  -2.5016861e+01   1.5000000e+02  -7.7321993e+00   4.3777900e+00  -1.4886204e+00
   2.7605236e+01  -2.4888335e+01   1.5000000e+02  -7.1978922e+00   4.5200617e+00  -2.0358652e+00
   2.7597204e+01  -2.4759962e+01   1.5000000e+02  -6.6573575e+00   4.6609057e+00  -2.4359702e+00
   2.7585278e+01  -2.4631839e+01   1.5000000e+02  -6.1492058e+00   4.8058302e+00  -2.6834441e+00
   2.7569480e+01  -2.4504064e+01   1.5000000e+02  -5.7125837e+00   4.9603167e+00  -2.7877933e+00
   2.7549834e+01  -2.4376734e+01   1.5000000e+02  -5.3832586e+00   5.1261287e+00  -2.7746373e+00
   2.7526364e+01  -2.4249945e+01   1.5000000e+02  -5.1887154e+00   5.2980676e+00  -2.6855430e+00
   2.7499101e+01  -2.4123793e+01   1.5000000e+02  -5.1421499e+00   5.4623298e+00  -2.5753895e+00
   2.7468076e+01  -2.3998372e+01   1.5000000e+02  -5.2364596e+00   5.5969718e+00  -2.5061394e+00
   2.7433323e+01  -2.3873777e+01   1.5000000e+02  -5.4404062e+00   5.6747647e+00  -2.5365438e+00
   2.7394878e+01  -2.3750101e+01   1.5000000e+02  -5.6997814e+00   5.6681150e+00  -2.7091657e+00
   2.7352780e+01  -2.3627436e+01   1.5000000e+02  -5.9457176e+00   5.5551263e+00  -3.0382040e+00
   2.7307070e+01  -2.3505874e+01   1.5000000e+02  -6.1098529e+00   5.3251498e+00  -3.5031198e+00
   2.7257792e+01  -2.3385504e+01   1.5000000e+02  -6.1423968e+00   4.9819067e+00  -4.0522930e+00
   2.7204991e+01  -2.3266416e+01   1.5000000e+02  -6.0263404e+00   4.5428790e+00  -4.6172996e+00
   2.7148715e+01  -2.3148697e+01   1.5000000e+02  -5.7816636e+00   4.0350857e+00  -5.1332901e+00
   2.7089014e+01  -2.3032435e+01   1.5000000e+02  -5.4575688e+00   3.4887272e+00  -5.5578419e+00
   2.7025940e+01  -2.2917715e+01   1.5000000e+02  -5.1161232e+00   2.9306968e+00  -5.8814957e+00
   2.6959549e+01  -2.2804620e+01   1.5000000e+02  -4.8137753e+00   2.3795597e+00  -6.1272350e+00
   2.6889895e+01  -2.2693235e+01   1.5000000e+02  -4.5867009e+00   1.8426978e+00  -6.3405684e+00
   2.6817037e+01  -2.2583640e+01   1.5000000e+02  -4.4434613e+00   1.3157628e+00  -6.5741275e+00
   2.6741035e+01  -2.2475915e+01   1.5000000e+02  -4.3656528e+00   7.8457748e-01  -6.8714271e+00
   2.6661951e+01  -2.2370139e+01   1.5000000e+02  -4.3154524e+00   2.2938455e-01  -7.2539323e+00
   2.6579849e+01  -2.2266389e+01   1.5000000e+02  -4.2474594e+00  -3.6922956e-01  -7.7148467e+00
   2.6494794e+01  -2.2164739e+01   1.5000000e+02  -4.1211833e+00  -1.0243069e+00  -8.2212057e+00
   2.6406854e+01  -2.2065263e+01   1.5000000e+02  -3.9104505e+00  -1.7383289e+00  -8.7231256e+00
   2.6316096e+01  -2.1968034e+01   1.5000000e+02  -3.6072927e+00  -2.5023169e+00  -9.1666286e+00
   2.6222593e+01  -2.1873121e+01   1.5000000e+02  -3.2201675e+00  -3.2982471e+00  -9.5054910e+00
   2.6126416e+01  -2.1780593e+01   1.5000000e+02  -2.7682200e+00  -4.1036179e+00  -9.7085572e+00
   2.6027637e+01  -2.1690516e+01   1.5000000e+02  -2.2744356e+00  -4.8962832e+00  -9.7612914e+00
   2.5926334e+01  -2.1602955e+01   1.5000000e+02  -1.7600531e+00  -5.6578826e+00  -9.6624878e+00
   2.5822581e+01  -2.1517973e+01   1.5000000e+02  -1.2415036e+00  -6.3750510e+00  -9.4183529e+00
   2.5716457e+01  -2.1435631e+01   1.5000000e+02  -7.3019162e-01  -7.0381565e+00  -9.0365894e+00
   2.5608040e+01  -2.1355988e+01   1.5000000e+02  -2.3434839e-01  -7.6382912e+00  -8.5224675e+00
   2.5497412e+01  -2.1279101e+01   1.5000000e+02   2.3798000e-01  -8.1635811e+00  -7.8783224e+00
   2.5384653e+01  -2.1205024e+01   1.5000000e+02   6.7608411e-01  -8.5964678e+00  -7.1066415e+00
   2.5269847e+01  -2.1133811e+01   1.5000000e+02   1.0649423e+00  -8.9134511e+00  -6.2158622e+00
   2.5153077e+01  -2.1065512e+01   1.5000000e+02   1.3856512e+00  -9.0882167e+00  -5.2265226e+00
   2.5034429e+01  -2.1000176e+01   1.5000000e+02   1.6179236e+00  -9.0975792e+00  -4.1752299e+00
   2.4913988e+01  -2.0937849e+01   1.5000000e+02   1.7439302e+00  -8.9285816e+00  -3.1143732e+00
   2.4791842e+01  -2.0878576e+01   1.5000000e+02   1.7521395e+00  -8.5845723e+00  -2.1072764e+00
   2.4668078e+01  -2.0822399e+01   1.5000000e+02   1.6399736e+00  -8.0885046e+00  -1.2196838e+00
   2.4542785e+01  -2.0769358e+01   1.5000000e+02   1.4145754e+00  -7.4824372e+00  -5.0958376e-01
   2.4416053e+01  -2.0719489e+01   1.5000000e+02   1.0915804e+00  -6.8228827e+00  -1.7601348e-02
   2.4287972e+01  -2.0672830e+01   1.5000000e+02   6.9228306e-01  -6.1726635e+00   2.3945420e-01
   2.4158634e+01  -2.0629412e+01   1.5000000e+02   2.3997582e-01  -5.5912083e+00   2.6992899e-01
   2.4028130e+01  -2.0589266e+01   1.5000000e+02  -2.4341048e-01  -5.1262216e+00   1.0315324e-01
   2.3896552e+01  -2.0552422e+01   1.5000000e+02  -7.3947134e-01  -4.8092209e+00  -2.1839055e-01
   2.3763993e+01  -2.0518904e+01   1.5000000e+02  -1.2339905e+00  -4.6556853e+00  -6.4746176e-01
   2.3630548e+01  -2.0488737e+01   1.5000000e+02  -1.7163779e+00  -4.6686787e+00  -1.1382454e+00
   2.3496310e+01  -2.0461942e+01   1.5000000e+02  -2.1786505e+00  -4.8436132e+00  -1.6491468e+00
   2.3361374e+01  -2.0438538e+01   1.5000000e+02  -2.6144549e+00  -5.1721195e+00  -2.1426192e+00
   2.3225834e+01  -2.0418541e+01   1.5000000e+02  -3.0185192e+00  -5.6438927e+00  -2.5835094e+00
   2.3089785e+01  -2.0401965e+01   1.5000000e+02  -3.3865553e+00  -6.2464661e+00  -2.9374313e+00
   2.2953324e+01  -2.0388823e+01   1.5000000e+02  -3.7155796e+00  -6.9636358e+00  -3.1703744e+00
   2.2816545e+01  -2.0379124e+01   1.5000000e+02  -4.0045132e+00  -7.7737155e+00  -3.2501322e+00
   2.2679544e+01  -2.0372873e+01   1.5000000e+02  -4.2547424e+00  -8.6487899e+00  -3.1492822e+00
   2.2542418e+01  -2.0370077e+01   1.5000000e+02  -4.4703123e+00  -9.5559049e+00  -2.8486573e+00
   2.2405262e+01  -2.0370736e+01   1.5000000e+02  -4.6574176e+00  -1.0460090e+01  -2.3397632e+00
   2.2268172e+01  -2.0374850e+01   1.5000000e+02  -4.8231106e+00  -1.1328036e+01  -1.6247076e+00
   2.2131245e+01  -2.0382417e+01   1.5000000e+02  -4.9735870e+00  -1.2130650e+01  -7.1366240e-01
   2.1994576e+01  -2.0393431e+01   1.5000000e+02  -5.1126122e+00  -1.2843219e+01   3.7882557e-01
   2.1858260e+01  -2.0407884e+01   1.5000000e+02  -5.2405887e+00  -1.3443229e+01   1.6365303e+00
   2.1722394e+01  -2.0425766e+01   1.5000000e+02  -5.3544957e+00  -1.3907388e+01   3.0416536e+00
   2.1587073e+01  -2.0447065e+01   1.5000000e+02  -5.4486452e+00  -1.4209980e+01   4.5722981e+00
   2.1452392e+01  -2.0471765e+01   1.5000000e+02  -5.5160223e+00  -1.4324091e+01   6.1986077e+00
   2.1318446e+01  -2.0499849e+01   1.5000000e+02  -5.5499065e+00  -1.4225968e+01   7.8799194e+00
   2.1185328e+01  -2.0531297e+01   1.5000000e+02  -5.5454416e+00  -1.3901248e+01   9.5649032e+00
   2.1053132e+01  -2.0566086e+01   1.5000000e+02  -5.5007690e+00  -1.3350793e+01   1.1195424e+01
   2.0921953e+01  -2.0604193e+01   1.5000000e+02  -5.4173977e+00  -1.2593960e+01   1.2713443e+01
   2.0791883e+01  -2.0645591e+01   1.5000000e+02  -5.2996650e+00  -1.1667935e+01   1.4068961e+01
   2.0663013e+01  -2.0690249e+01   1.5000000e+02  -5.1532974e+00  -1.0623293e+01   1.5226661e+01
   2.0535436e+01  -2.0738137e+01   1.5000000e+02  -4.9833953e+00  -9.5169711e+00   1.6169632e+01
   2.0409243e+01  -2.0789220e+01   1.5000000e+02  -4.7925206e+00  -8.4043116e+00   1.6899474e+01
   2.0284523e+01  -2.0843462e+01   1.5000000e+02  -4.5795107e+00  -7.3320343e+00   1.7433023e+01
   2.0161365e+01  -2.0900825e+01   1.5000000e+02  -4.3396168e+00  -6.3335458e+00   1.7796794e+01
   2.0039859e+01  -2.0961268e+01   1.5000000e+02  -4.0660051e+00  -5.4273574e+00   1.8020738e+01
   1.9920092e+01  -2.1024748e+01   1.5000000e+02  -3.7521146e+00  -4.6185517e+00   1.8132935e+01
   1.9802151e+01  -2.1091220e+01   1.5000000e+02  -3.3940422e+00  -3.9025173e+00   1.8156379e+01
   1.9686120e+01  -2.1160637e+01   1.5000000e+02  -2.9921577e+00  -3.2694394e+00   1.8108239e+01
   1.9572085e+01  -2.1232948e+01   1.5000000e+02  -2.5515196e+00  -2.7082592e+00   1.8001085e+01
   1.9460129e+01  -2.1308104e+01   1.5000000e+02  -2.0810575e+00  -2.2091283e+00   1.7845072e+01
   1.9350335e+01  -2.1386049e+01   1.5000000e+02  -1.5920063e+00  -1.7642866e+00   1.7650017e+01
   1.9242784e+01  -2.1466728e+01   1.5000000e+02  -1.0958989e+00  -1.3676442e+00   1.7426632e+01
   1.9137555e+01  -2.1550084e+01   1.5000000e+02  -6.0274531e-01  -1.0137790e+00   1.7186562e+01
   1.9034727e+01  -2.1636057e+01   1.5000000e+02  -1.1973147e-01  -6.9703999e-01   1.6941353e+01
   1.8934378e+01  -2.1724585e+01   1.5000000e+02   3.4926900e-01  -4.1127412e-01   1.6700801e+01
   1.8836583e+01  -2.1815605e+01   1.5000000e+02   8.0328586e-01  -1.5035596e-01   1.6471497e+01
   1.8741417e+01  -2.1909051e+01   1.5000000e+02   1.2432105e+00   9.0762778e-02   1.6256320e+01
   1.8648953e+01  -2.2004856e+01   1.5000000e+02   1.6707484e+00   3.1515354e-01   1.6055148e+01
   1.8559262e+01  -2.2102951e+01   1.5000000e+02   2.0878962e+00   5.2378576e-01   1.5866346e+01
   1.8472415e+01  -2.2203264e+01   1.5000000e+02   2.4970803e+00   7.1640164e-01   1.5688019e+01
   1.8388478e+01  -2.2305724e+01   1.5000000e+02   2.9015361e+00   8.9298370e-01   1.5518157e+01
   1.8307520e+01  -2.2410257e+01   1.5000000e+02   3.3051872e+00   1.0549734e+00   1.5353632e+01
   1.8229604e+01  -2.2516785e+01   1.5000000e+02   3.7117320e+00   1.2056210e+00   1.5188777e+01
   1.8154795e+01  -2.2625233e+01   1.5000000e+02   4.1231158e+00   1.3493528e+00   1.5014570e+01
   1.8083152e+01  -2.2735520e+01   1.5000000e+02   4.5378925e+00   1.4905224e+00   1.4819031e+01
   1.8014736e+01  -2.2847567e+01   1.5000000e+02   4.9500655e+00   1.6320373e+00   1.4588848e+01
   1.7949604e+01  -2.2961291e+01   1.5000000e+02   5.3487352e+00   1.7742111e+00   1.4312017e+01
   1.7887810e+01  -2.3076610e+01   1.5000000e+02   5.7189949e+00   1.9141587e+00   1.3980996e+01
   1.7829410e+01  -2.3193438e+01   1.5000000e+02   6.0442550e+00   2.0460210e+00   1.3595591e+01
   1.7774454e+01  -2.3311689e+01   1.5000000e+02   6.3097980e+00   2.1621982e+00   1.3164393e+01
   1.7722991e+01  -2.3431277e+01   1.5000000e+02   6.5065751e+00   2.2552810e+00   1.2703920e+01
   1.7675069e+01  -2.3552112e+01   1.5000000e+02   6.6339913e+00   2.3200892e+00   1.2235409e+01
   1.7630732e+01  -2.3674106e+01   1.5000000e+02   6.7007503e+00   2.3551205e+00   1.1780112e+01
   1.7590022e+01  -2.3797168e+01   1.5000000e+02   6.7235312e+00   2.3629760e+00   1.1354494e+01
   1.7552981e+01  -2.3921205e+01   1.5000000e+02   6.7239405e+00   2.3497406e+00   1.0966405e+01
   1.7519646e+01  -2.4046126e+01   1.5000000e+02   6.7242934e+00   2.3235765e+00   1.0612850e+01
   1.7490053e+01  -2.4171837e+01   1.5000000e+02   6.7427791e+00   2.2928039e+00   1.0279898e+01
   1.7464233e+01  -2.4298243e+01   1.5000000e+02   6.7887763e+00   2.2638402e+00   9.9450666e+00
   1.7442219e+01  -2.4425250e+01   1.5000000e+02   6.8595792e+00   2.2393590e+00   9.5822620e+00
   1.7424038e+01  -2.4552761e+01   1.5000000e+02   6.9398559e+00   2.2172535e+00   9.1683142e+00
   1.7409714e+01  -2.4680680e+01   1.5000000e+02   7.0045050e+00   2.1906465e+00   8.6892328e+00
   1.7399272e+01  -2.4808910e+01   1.5000000e+02   7.0242194e+00   2.1490301e+00   8.1441355e+00
   1.7392729e+01  -2.4937353e+01   1.5000000e+02   6.9719575e+00   2.0802993e+00   7.5455482e+00
   1.7390105e+01  -2.5065911e+01   1.5000000e+02   6.8282602e+00   1.9730539e+00   6.9163978e+00
   1.7391413e+01  -2.5194486e+01   1.5000000e+02   6.5839548e+00   1.8189049e+00   6.2849899e+00
   1.7396664e+01  -2.5322979e+01   1.5000000e+02   6.2400198e+00   1.6142195e+00   5.6799939e+00
   1.7405867e+01  -2.5451290e+01   1.5000000e+02   5.8054150e+00   1.3610700e+00   5.1268598e+00
   1.7419027e+01  -2.5579320e+01   1.5000000e+02   5.2942748e+00   1.0671414e+00   4.6462744e+00
   1.7436148e+01  -2.5706971e+01   1.5000000e+02   4.7238332e+00   7.4454692e-01   4.2543037e+00
   1.7457228e+01  -2.5834142e+01   1.5000000e+02   4.1137726e+00   4.0789219e-01   3.9630440e+00
   1.7482265e+01  -2.5960734e+01   1.5000000e+02   3.4866950e+00   7.1950850e-02   3.7805870e+00
   1.7511251e+01  -2.6086648e+01   1.5000000e+02   2.8687010e+00  -2.5034230e-01   3.7096718e+00
   1.7544176e+01  -2.6211786e+01   1.5000000e+02   2.2888713e+00  -5.4927627e-01   3.7454414e+00
   1.7581028e+01  -2.6336047e+01   1.5000000e+02   1.7770345e+00  -8.1884183e-01   3.8734183e+00
   1.7621791e+01  -2.6459334e+01   1.5000000e+02   1.3600120e+00  -1.0564174e+00   4.0689590e+00
   1.7666444e+01  -2.6581549e+01   1.5000000e+02   1.0573886e+00  -1.2620050e+00   4.2988874e+00
   1.7714966e+01  -2.6702594e+01   1.5000000e+02   8.7787603e-01  -1.4375347e+00   4.5252100e+00
   1.7767330e+01  -2.6822373e+01   1.5000000e+02   8.1732664e-01  -1.5865157e+00   4.7100992e+00
[truncated: 3,642,157 more chars]
