# Supplementary material for: A high-resolution lithospheric magnetic field model over southern Africa based on a joint inversion of CHAMP, Swarm, WDMAM, and ground magnetic field data
Source: Copernicus journal article supplement (doi:10.5194/se-9-897-2018), 2018-07-16
Supplement: Supplementary file 1 [file se-9-897-2018-supplement.zip › SupplementaryMaterial/ModelSA200km.txt]

   2.2500005e+01  -2.4999991e+01   2.0000000e+02   4.6063377e+00  -4.2860079e+00  -1.2453821e+01
   2.2566483e+01  -2.5124977e+01   2.0000000e+02   3.6362099e+00  -3.4782517e+00  -1.3163293e+01
   2.2649272e+01  -2.5030796e+01   2.0000000e+02   3.8321388e+00  -3.5578756e+00  -1.2998630e+01
   2.2619593e+01  -2.4913455e+01   2.0000000e+02   4.6075520e+00  -4.2066846e+00  -1.2405374e+01
   2.2500000e+01  -2.4861269e+01   2.0000000e+02   5.3476891e+00  -4.8625754e+00  -1.1763711e+01
   2.2380407e+01  -2.4913455e+01   2.0000000e+02   5.5128545e+00  -5.0414735e+00  -1.1642396e+01
   2.2350728e+01  -2.5030796e+01   2.0000000e+02   4.9970711e+00  -4.6764618e+00  -1.2151906e+01
   2.2433517e+01  -2.5124977e+01   2.0000000e+02   4.1655328e+00  -4.0025823e+00  -1.2824341e+01
   2.2791110e+01  -2.5050403e+01   2.0000000e+02   3.1056532e+00  -2.8211917e+00  -1.3391532e+01
   2.2783469e+01  -2.4922052e+01   2.0000000e+02   3.8757519e+00  -3.4765732e+00  -1.2896598e+01
   2.2711005e+01  -2.4811602e+01   2.0000000e+02   4.7851634e+00  -4.2945645e+00  -1.2192844e+01
   2.2590406e+01  -2.4744279e+01   2.0000000e+02   5.6025644e+00  -5.0324601e+00  -1.1436060e+01
   2.2449214e+01  -2.4735429e+01   2.0000000e+02   6.1569937e+00  -5.5176293e+00  -1.0874482e+01
   2.2319588e+01  -2.4787069e+01   2.0000000e+02   6.3515333e+00  -5.6884238e+00  -1.0709520e+01
   2.2231095e+01  -2.4887431e+01   2.0000000e+02   6.1522551e+00  -5.5632986e+00  -1.0989480e+01
   2.2204049e+01  -2.5013608e+01   2.0000000e+02   5.5958609e+00  -5.1868018e+00  -1.1604403e+01
   2.2244821e+01  -2.5136726e+01   2.0000000e+02   4.7924530e+00  -4.6071271e+00  -1.2353206e+01
   2.2344231e+01  -2.5228534e+01   2.0000000e+02   3.9116366e+00  -3.9010883e+00  -1.3028221e+01
   2.2479512e+01  -2.5267912e+01   2.0000000e+02   3.1548773e+00  -3.2022403e+00  -1.3488767e+01
   2.2619515e+01  -2.5245788e+01   2.0000000e+02   2.7060109e+00  -2.6895335e+00  -1.3690164e+01
   2.2731985e+01  -2.5167260e+01   2.0000000e+02   2.6825909e+00  -2.5350336e+00  -1.3651634e+01
   2.2627648e+01  -2.4622121e+01   2.0000000e+02   6.0472296e+00  -5.4005991e+00  -1.0856352e+01
   2.2485785e+01  -2.4604968e+01   2.0000000e+02   6.6249847e+00  -5.9013039e+00  -1.0202150e+01
   2.2345448e+01  -2.4630489e+01   2.0000000e+02   6.9781718e+00  -6.1762648e+00  -9.8177997e+00
   2.2221716e+01  -2.4695945e+01   2.0000000e+02   7.0808717e+00  -6.2403964e+00  -9.7712283e+00
   2.2127926e+01  -2.4794296e+01   2.0000000e+02   6.9193526e+00  -6.1246076e+00  -1.0058157e+01
   2.2074261e+01  -2.4914949e+01   2.0000000e+02   6.5032202e+00  -5.8566256e+00  -1.0614119e+01
   2.2066638e+01  -2.5044874e+01   2.0000000e+02   5.8689624e+00  -5.4505605e+00  -1.1338890e+01
   2.2106024e+01  -2.5169999e+01   2.0000000e+02   5.0742197e+00  -4.9127964e+00  -1.2118302e+01
   2.2188274e+01  -2.5276731e+01   2.0000000e+02   4.1946636e+00  -4.2606230e+00  -1.2841750e+01
   2.2304526e+01  -2.5353443e+01   2.0000000e+02   3.3233043e+00  -3.5376543e+00  -1.3423433e+01
   2.2442139e+01  -2.5391760e+01   2.0000000e+02   2.5605119e+00  -2.8148885e+00  -1.3819773e+01
   2.2586081e+01  -2.5387492e+01   2.0000000e+02   1.9958686e+00  -2.1830832e+00  -1.4029221e+01
   2.2720608e+01  -2.5341106e+01   2.0000000e+02   1.6950921e+00  -1.7425232e+00  -1.4079191e+01
   2.2831035e+01  -2.5257672e+01   2.0000000e+02   1.6976920e+00  -1.5836760e+00  -1.4007486e+01
   2.2905370e+01  -2.5146297e+01   2.0000000e+02   2.0167837e+00  -1.7579623e+00  -1.3835037e+01
   2.2935626e+01  -2.5019107e+01   2.0000000e+02   2.6287335e+00  -2.2540697e+00  -1.3542481e+01
   2.2918657e+01  -2.4889911e+01   2.0000000e+02   3.4581967e+00  -2.9944896e+00  -1.3083001e+01
   2.2856438e+01  -2.4772694e+01   2.0000000e+02   4.3848948e+00  -3.8543014e+00  -1.2435419e+01
   2.2755800e+01  -2.4680108e+01   2.0000000e+02   5.2806726e+00  -4.6949795e+00  -1.1651761e+01
   2.2005477e+01  -2.4730152e+01   2.0000000e+02   7.5546086e+00  -6.5655369e+00  -9.1910892e+00
   2.1948449e+01  -2.4845263e+01   2.0000000e+02   7.1898778e+00  -6.3373108e+00  -9.7462445e+00
   2.1923356e+01  -2.4969413e+01   2.0000000e+02   6.6627485e+00  -6.0279691e+00  -1.0436268e+01
   2.1931748e+01  -2.5095402e+01   2.0000000e+02   5.9997448e+00  -5.6325797e+00  -1.1199268e+01
   2.1973238e+01  -2.5215904e+01   2.0000000e+02   5.2316008e+00  -5.1434713e+00  -1.1971811e+01
   2.2045499e+01  -2.5323890e+01   2.0000000e+02   4.3949989e+00  -4.5606090e+00  -1.2691295e+01
   2.2144380e+01  -2.5413044e+01   2.0000000e+02   3.5361411e+00  -3.8989710e+00  -1.3304303e+01
   2.2264136e+01  -2.5478137e+01   2.0000000e+02   2.7094763e+00  -3.1888946e+00  -1.3777051e+01
   2.2397759e+01  -2.5515346e+01   2.0000000e+02   1.9703559e+00  -2.4715399e+00  -1.4099150e+01
   2.2537398e+01  -2.5522483e+01   2.0000000e+02   1.3666111e+00  -1.7954703e+00  -1.4278893e+01
   2.2674836e+01  -2.5499126e+01   2.0000000e+02   9.3382297e-01  -1.2160013e+00  -1.4337019e+01
   2.2801990e+01  -2.5446650e+01   2.0000000e+02   6.9550345e-01  -7.9250113e-01  -1.4303352e+01
   2.2911403e+01  -2.5368141e+01   2.0000000e+02   6.6687612e-01  -5.7965331e-01  -1.4211874e+01
   2.2996693e+01  -2.5268206e+01   2.0000000e+02   8.5842163e-01  -6.1507682e-01  -1.4088314e+01
   2.3052932e+01  -2.5152698e+01   2.0000000e+02   1.2735736e+00  -9.0929755e-01  -1.3933460e+01
   2.3076921e+01  -2.5028363e+01   2.0000000e+02   1.8985933e+00  -1.4419599e+00  -1.3715320e+01
   2.3067361e+01  -2.4902443e+01   2.0000000e+02   2.6916057e+00  -2.1640334e+00  -1.3381713e+01
   2.3024906e+01  -2.4782247e+01   2.0000000e+02   3.5831392e+00  -3.0047000e+00  -1.2889716e+01
   2.2952106e+01  -2.4674736e+01   2.0000000e+02   4.4920816e+00  -3.8819435e+00  -1.2233841e+01
   2.2853234e+01  -2.4586117e+01   2.0000000e+02   5.3473536e+00  -4.7158034e+00  -1.1456152e+01
   2.2734035e+01  -2.4521494e+01   2.0000000e+02   6.1011567e+00  -5.4409583e+00  -1.0636347e+01
   2.2601387e+01  -2.4484584e+01   2.0000000e+02   6.7285382e+00  -6.0149669e+00  -9.8709769e+00
   2.2462919e+01  -2.4477508e+01   2.0000000e+02   7.2175642e+00  -6.4198638e+00  -9.2520301e+00
   2.2326579e+01  -2.4500672e+01   2.0000000e+02   7.5582788e+00  -6.6581325e+00  -8.8506195e+00
   2.2200199e+01  -2.4552745e+01   2.0000000e+02   7.7369815e+00  -6.7461377e+00  -8.7074007e+00
   2.2091059e+01  -2.4630734e+01   2.0000000e+02   7.7385985e+00  -6.7073878e+00  -8.8290889e+00
   2.1844868e+01  -2.5273528e+01   2.0000000e+02   5.2750202e+00  -5.3291562e+00  -1.1905135e+01
   2.1916247e+01  -2.5384116e+01   2.0000000e+02   4.4361034e+00  -4.7737510e+00  -1.2641136e+01
   2.2010268e+01  -2.5479941e+01   2.0000000e+02   3.5674779e+00  -4.1363655e+00  -1.3277552e+01
   2.2123330e+01  -2.5557281e+01   2.0000000e+02   2.7071832e+00  -3.4360717e+00  -1.3785253e+01
   2.2251066e+01  -2.5613127e+01   2.0000000e+02   1.8967525e+00  -2.7000094e+00  -1.4153163e+01
   2.2388512e+01  -2.5645302e+01   2.0000000e+02   1.1748041e+00  -1.9589672e+00  -1.4385686e+01
   2.2530311e+01  -2.5652548e+01   2.0000000e+02   5.7233074e-01  -1.2465727e+00  -1.4496257e+01
   2.2670926e+01  -2.5634584e+01   2.0000000e+02   1.1085816e-01  -6.0126536e-01  -1.4503354e+01
   2.2804870e+01  -2.5592111e+01   2.0000000e+02  -1.9685181e-01  -6.6781926e-02  -1.4431060e+01
   2.2926927e+01  -2.5526786e+01   2.0000000e+02  -3.4390165e-01   3.1187483e-01  -1.4310333e+01
   2.3032366e+01  -2.5441153e+01   2.0000000e+02  -3.2473275e-01   4.9595482e-01  -1.4175246e+01
   2.3117126e+01  -2.5338544e+01   2.0000000e+02  -1.3149701e-01   4.6033559e-01  -1.4052126e+01
   2.3177977e+01  -2.5222939e+01   2.0000000e+02   2.4474963e-01   1.9782954e-01  -1.3945560e+01
   2.3212635e+01  -2.5098809e+01   2.0000000e+02   8.0601754e-01  -2.8004028e-01  -1.3829833e+01
   2.3219844e+01  -2.4970944e+01   2.0000000e+02   1.5360508e+00  -9.4440861e-01  -1.3653575e+01
   2.3199412e+01  -2.4844261e+01   2.0000000e+02   2.3940670e+00  -1.7515070e+00  -1.3358292e+01
   2.3152206e+01  -2.4723616e+01   2.0000000e+02   3.3197436e+00  -2.6461243e+00  -1.2902062e+01
   2.3080104e+01  -2.4613620e+01   2.0000000e+02   4.2477170e+00  -3.5669373e+00  -1.2276371e+01
   2.2985914e+01  -2.4518468e+01   2.0000000e+02   5.1231640e+00  -4.4536335e+00  -1.1509629e+01
   2.2873265e+01  -2.4441779e+01   2.0000000e+02   5.9107283e+00  -5.2543922e+00  -1.0659318e+01
   2.2746461e+01  -2.4386462e+01   2.0000000e+02   6.5945263e+00  -5.9316455e+00  -9.7988869e+00
   2.2610323e+01  -2.4354616e+01   2.0000000e+02   7.1716903e+00  -6.4644801e+00  -9.0046736e+00
   2.2470010e+01  -2.4347446e+01   2.0000000e+02   7.6436904e+00  -6.8475089e+00  -8.3452854e+00
   2.2330831e+01  -2.4365223e+01   2.0000000e+02   8.0087732e+00  -7.0872448e+00  -7.8744747e+00
   2.2198056e+01  -2.4407274e+01   2.0000000e+02   8.2579946e+00  -7.1981573e+00  -7.6270423e+00
   2.2076722e+01  -2.4472006e+01   2.0000000e+02   8.3762166e+00  -7.1997106e+00  -7.6166188e+00
   2.1971451e+01  -2.4556965e+01   2.0000000e+02   8.3476667e+00  -7.1136094e+00  -7.8350867e+00
   2.1886278e+01  -2.4658924e+01   2.0000000e+02   8.1633322e+00  -6.9599015e+00  -8.2550241e+00
   2.1824496e+01  -2.4774000e+01   2.0000000e+02   7.8258772e+00  -6.7522433e+00  -8.8362873e+00
   2.1788530e+01  -2.4897801e+01   2.0000000e+02   7.3489708e+00  -6.4944021e+00  -9.5345613e+00
   2.1779836e+01  -2.5025590e+01   2.0000000e+02   6.7519357e+00  -6.1799844e+00  -1.0306942e+01
   2.1798831e+01  -2.5152461e+01   2.0000000e+02   6.0543316e+00  -5.7959569e+00  -1.1111721e+01
   2.2206112e+01  -2.5734817e+01   2.0000000e+02   1.2498969e+00  -2.4153267e+00  -1.4384670e+01
   2.2344390e+01  -2.5768576e+01   2.0000000e+02   5.2545710e-01  -1.6530874e+00  -1.4560886e+01
   2.2486994e+01  -2.5781239e+01   2.0000000e+02  -9.4750820e-02  -9.0528541e-01  -1.4627814e+01
   2.2629959e+01  -2.5772455e+01   2.0000000e+02  -5.9528830e-01  -1.9850245e-01  -1.4600216e+01
   2.2769312e+01  -2.5742469e+01   2.0000000e+02  -9.6780528e-01   4.3550856e-01  -1.4494838e+01
   2.2901183e+01  -2.5692114e+01   2.0000000e+02  -1.2099179e+00   9.6086943e-01  -1.4334075e+01
   2.3021922e+01  -2.5622788e+01   2.0000000e+02  -1.3225207e+00   1.3420093e+00  -1.4147881e+01
   2.3128207e+01  -2.5536414e+01   2.0000000e+02  -1.3055047e+00   1.5493397e+00  -1.3970653e+01
   2.3217130e+01  -2.5435380e+01   2.0000000e+02  -1.1536032e+00   1.5636039e+00  -1.3832583e+01
   2.3286284e+01  -2.5322476e+01   2.0000000e+02  -8.5560258e-01   1.3778095e+00  -1.3747946e+01
   2.3333824e+01  -2.5200810e+01   2.0000000e+02  -3.9904695e-01   9.9678933e-01  -1.3705382e+01
   2.3358512e+01  -2.5073722e+01   2.0000000e+02   2.2015907e-01   4.3584038e-01  -1.3665808e+01
   2.3359744e+01  -2.4944688e+01   2.0000000e+02   9.8801187e-01  -2.8038320e-01  -1.3571100e+01
   2.3337560e+01  -2.4817228e+01   2.0000000e+02   1.8686806e+00  -1.1184042e+00  -1.3361192e+01
   2.3292633e+01  -2.4694808e+01   2.0000000e+02   2.8099767e+00  -2.0368567e+00  -1.2992294e+01
   2.3226246e+01  -2.4580748e+01   2.0000000e+02   3.7553335e+00  -2.9888581e+00  -1.2448648e+01
   2.3140249e+01  -2.4478131e+01   2.0000000e+02   4.6562824e+00  -3.9261960e+00  -1.1744647e+01
   2.3037005e+01  -2.4389725e+01   2.0000000e+02   5.4801952e+00  -4.8043671e+00  -1.0919363e+01
   2.2919326e+01  -2.4317909e+01   2.0000000e+02   6.2117527e+00  -5.5871676e+00  -1.0027681e+01
   2.2790392e+01  -2.4264612e+01   2.0000000e+02   6.8495019e+00  -6.2497351e+00  -9.1313817e+00
   2.2653675e+01  -2.4231265e+01   2.0000000e+02   7.3998726e+00  -6.7793826e+00  -8.2917052e+00
   2.2512842e+01  -2.4218760e+01   2.0000000e+02   7.8708492e+00  -7.1742916e+00  -7.5636268e+00
   2.2371665e+01  -2.4227433e+01   2.0000000e+02   8.2665004e+00  -7.4406020e+00  -6.9922055e+00
   2.2233924e+01  -2.4257052e+01   2.0000000e+02   8.5834407e+00  -7.5895205e+00  -6.6106195e+00
   2.2103315e+01  -2.4306822e+01   2.0000000e+02   8.8100330e+00  -7.6356810e+00  -6.4390359e+00
   2.1983349e+01  -2.4375409e+01   2.0000000e+02   8.9289251e+00  -7.5965899e+00  -6.4832257e+00
   2.1877268e+01  -2.4460971e+01   2.0000000e+02   8.9224230e+00  -7.4915872e+00  -6.7333424e+00
   2.1787954e+01  -2.4561206e+01   2.0000000e+02   8.7788527e+00  -7.3391628e+00  -7.1648271e+00
   2.1717858e+01  -2.4673412e+01   2.0000000e+02   8.4970406e+00  -7.1531556e+00  -7.7430404e+00
   2.1668928e+01  -2.4794557e+01   2.0000000e+02   8.0866695e+00  -6.9395638e+00  -8.4304327e+00
   2.1642551e+01  -2.4921357e+01   2.0000000e+02   7.5642609e+00  -6.6953103e+00  -9.1927505e+00
   2.1639516e+01  -2.5050367e+01   2.0000000e+02   6.9471487e+00  -6.4092617e+00  -1.0000832e+01
   2.1659977e+01  -2.5178069e+01   2.0000000e+02   6.2493383e+00  -6.0653032e+00  -1.0827274e+01
   2.1703447e+01  -2.5300971e+01   2.0000000e+02   5.4817477e+00  -5.6470549e+00  -1.1641410e+01
   2.1768802e+01  -2.5415702e+01   2.0000000e+02   4.6564802e+00  -5.1435415e+00  -1.2407330e+01
   2.1854304e+01  -2.5519106e+01   2.0000000e+02   3.7918051e+00  -4.5539457e+00  -1.3087830e+01
   2.1957642e+01  -2.5608328e+01   2.0000000e+02   2.9141853e+00  -3.8890600e+00  -1.3652550e+01
   2.2075997e+01  -2.5680903e+01   2.0000000e+02   2.0558567e+00  -3.1684281e+00  -1.4085155e+01
   2.2817160e+01  -2.5862456e+01   2.0000000e+02  -1.8993584e+00   1.2411737e+00  -1.4369746e+01
   2.2950195e+01  -2.5812714e+01   2.0000000e+02  -2.1227107e+00   1.7977435e+00  -1.4142514e+01
   2.3073880e+01  -2.5746332e+01   2.0000000e+02  -2.2397425e+00   2.2292282e+00  -1.3893885e+01
   2.3185665e+01  -2.5664687e+01   2.0000000e+02  -2.2557318e+00   2.5107483e+00  -1.3656711e+01
   2.3283263e+01  -2.5569471e+01   2.0000000e+02  -2.1713406e+00   2.6252129e+00  -1.3465026e+01
   2.3364693e+01  -2.5462651e+01   2.0000000e+02  -1.9793725e+00   2.5644702e+00  -1.3345333e+01
   2.3428322e+01  -2.5346430e+01   2.0000000e+02  -1.6651826e+00   2.3286502e+00  -1.3306919e+01
   2.3472896e+01  -2.5223196e+01   2.0000000e+02  -1.2119307e+00   1.9244981e+00  -1.3334778e+01
   2.3497562e+01  -2.5095476e+01   2.0000000e+02  -6.0966012e-01   1.3639800e+00  -1.3388779e+01
   2.3501877e+01  -2.4965878e+01   2.0000000e+02   1.3574358e-01   6.6388418e-01  -1.3411072e+01
   2.3485818e+01  -2.4837042e+01   2.0000000e+02   9.9828851e-01  -1.5342754e-01  -1.3339883e+01
   2.3449774e+01  -2.4711583e+01   2.0000000e+02   1.9350810e+00  -1.0592666e+00  -1.3124654e+01
   2.3394533e+01  -2.4592042e+01   2.0000000e+02   2.8954185e+00  -2.0189258e+00  -1.2736851e+01
   2.3321262e+01  -2.4480829e+01   2.0000000e+02   3.8315950e+00  -2.9937754e+00  -1.2173574e+01
   2.3231482e+01  -2.4380185e+01   2.0000000e+02   4.7070694e+00  -3.9446379e+00  -1.1454857e+01
   2.3127031e+01  -2.4292130e+01   2.0000000e+02   5.5002200e+00  -4.8356665e+00  -1.0617494e+01
   2.3010031e+01  -2.4218429e+01   2.0000000e+02   6.2037324e+00  -5.6375236e+00  -9.7083584e+00
   2.2882839e+01  -2.4160555e+01   2.0000000e+02   6.8213044e+00  -6.3295398e+00  -8.7786034e+00
   2.2748007e+01  -2.4119665e+01   2.0000000e+02   7.3630784e+00  -6.9004424e+00  -7.8791470e+00
   2.2608231e+01  -2.4096575e+01   2.0000000e+02   7.8410342e+00  -7.3476679e+00  -7.0570611e+00
   2.2466298e+01  -2.4091744e+01   2.0000000e+02   8.2648311e+00  -7.6752935e+00  -6.3529957e+00
   2.2325037e+01  -2.4105269e+01   2.0000000e+02   8.6384252e+00  -7.8913768e+00  -5.7999514e+00
   2.2187263e+01  -2.4136881e+01   2.0000000e+02   8.9579398e+00  -8.0060872e+00  -5.4230053e+00
   2.2055726e+01  -2.4185949e+01   2.0000000e+02   9.2113422e+00  -8.0314088e+00  -5.2389898e+00
   2.1933060e+01  -2.4251493e+01   2.0000000e+02   9.3804446e+00  -7.9818421e+00  -5.2550596e+00
   2.1821731e+01  -2.4332204e+01   2.0000000e+02   9.4451397e+00  -7.8744948e+00  -5.4664754e+00
   2.1723990e+01  -2.4426466e+01   2.0000000e+02   9.3888533e+00  -7.7274002e+00  -5.8554859e+00
   2.1641829e+01  -2.4532388e+01   2.0000000e+02   9.2034091e+00  -7.5563658e+00  -6.3933223e+00
   2.1576941e+01  -2.4647842e+01   2.0000000e+02   8.8913960e+00  -7.3717637e+00  -7.0455476e+00
   2.1530681e+01  -2.4770499e+01   2.0000000e+02   8.4649553e+00  -7.1765839e+00  -7.7787633e+00
   2.1504041e+01  -2.4897882e+01   2.0000000e+02   7.9412911e+00  -6.9661088e+00  -8.5657476e+00
   2.1497622e+01  -2.5027408e+01   2.0000000e+02   7.3370642e+00  -6.7289337e+00  -9.3862718e+00
   2.1511616e+01  -2.5156444e+01   2.0000000e+02   6.6643059e+00  -6.4488588e+00  -1.0223556e+01
   2.1545804e+01  -2.5282358e+01   2.0000000e+02   5.9299411e+00  -6.1077135e+00  -1.1058529e+01
   2.1599547e+01  -2.5402574e+01   2.0000000e+02   5.1390226e+00  -5.6893316e+00  -1.1865557e+01
   2.1671799e+01  -2.5514624e+01   2.0000000e+02   4.2997334e+00  -5.1841025e+00  -1.2612752e+01
   2.1761122e+01  -2.5616202e+01   2.0000000e+02   3.4272710e+00  -4.5924610e+00  -1.3267364e+01
   2.1865716e+01  -2.5705211e+01   2.0000000e+02   2.5444504e+00  -3.9253606e+00  -1.3803694e+01
   2.1983447e+01  -2.5779810e+01   2.0000000e+02   1.6788507e+00  -3.2012008e+00  -1.4209189e+01
   2.2111897e+01  -2.5838451e+01   2.0000000e+02   8.5832897e-01  -2.4408380e+00  -1.4485395e+01
   2.2248414e+01  -2.5879917e+01   2.0000000e+02   1.0726496e-01  -1.6637117e+00  -1.4643625e+01
   2.2390166e+01  -2.5903346e+01   2.0000000e+02  -5.5514785e-01  -8.8725274e-01  -1.4698481e+01
   2.2534204e+01  -2.5908248e+01   2.0000000e+02  -1.1151142e+00  -1.2927185e-01  -1.4663246e+01
   2.2677529e+01  -2.5894523e+01   2.0000000e+02  -1.5641925e+00   5.8893932e-01  -1.4549409e+01
   2.3395327e+01  -2.5648315e+01   2.0000000e+02  -3.0369206e+00   3.6227358e+00  -1.2839555e+01
   2.3476438e+01  -2.5543687e+01   2.0000000e+02  -2.8713977e+00   3.5754056e+00  -1.2708403e+01
   2.3542550e+01  -2.5430832e+01   2.0000000e+02  -2.6155466e+00   3.3814196e+00  -1.2675806e+01
   2.3592694e+01  -2.5311479e+01   2.0000000e+02  -2.2502890e+00   3.0460931e+00  -1.2736311e+01
   2.3626151e+01  -2.5187454e+01   2.0000000e+02  -1.7578756e+00   2.5766294e+00  -1.2862835e+01
   2.3642464e+01  -2.5060648e+01   2.0000000e+02  -1.1299412e+00   1.9816691e+00  -1.3009274e+01
   2.3641438e+01  -2.4932989e+01   2.0000000e+02  -3.7377992e-01   1.2720670e+00  -1.3118667e+01
   2.3623142e+01  -2.4806410e+01   2.0000000e+02   4.8603158e-01   4.6247192e-01  -1.3134603e+01
   2.3587905e+01  -2.4682823e+01   2.0000000e+02   1.4114503e+00  -4.2724617e-01  -1.3012106e+01
   2.3536306e+01  -2.4564089e+01   2.0000000e+02   2.3585549e+00  -1.3717213e+00  -1.2724658e+01
   2.3469165e+01  -2.4451993e+01   2.0000000e+02   3.2857474e+00  -2.3412830e+00  -1.2266098e+01
   2.3387527e+01  -2.4348212e+01   2.0000000e+02   4.1600476e+00  -3.3044159e+00  -1.1648281e+01
   2.3292645e+01  -2.4254297e+01   2.0000000e+02   4.9601828e+00  -4.2305836e+00  -1.0896598e+01
   2.3185961e+01  -2.4171648e+01   2.0000000e+02   5.6768078e+00  -5.0928032e+00  -1.0045162e+01
   2.3069082e+01  -2.4101496e+01   2.0000000e+02   6.3106882e+00  -5.8695210e+00  -9.1327983e+00
   2.2943759e+01  -2.4044881e+01   2.0000000e+02   6.8698471e+00  -6.5457555e+00  -8.2000113e+00
   2.2811860e+01  -2.4002644e+01   2.0000000e+02   7.3664253e+00  -7.1134835e+00  -7.2866908e+00
   2.2675344e+01  -2.3975411e+01   2.0000000e+02   7.8137040e+00  -7.5711874e+00  -6.4300768e+00
   2.2536233e+01  -2.3963584e+01   2.0000000e+02   8.2233908e+00  -7.9223954e+00  -5.6631242e+00
   2.2396586e+01  -2.3967339e+01   2.0000000e+02   8.6032030e+00  -8.1735308e+00  -5.0137086e+00
   2.2258470e+01  -2.3986621e+01   2.0000000e+02   8.9549058e+00  -8.3320238e+00  -4.5047668e+00
   2.2123927e+01  -2.4021143e+01   2.0000000e+02   9.2731212e+00  -8.4056552e+00  -4.1548532e+00
   2.1994955e+01  -2.4070395e+01   2.0000000e+02   9.5453092e+00  -8.4033380e+00  -3.9780919e+00
   2.1873472e+01  -2.4133646e+01   2.0000000e+02   9.7533773e+00  -8.3365318e+00  -3.9824509e+00
   2.1761292e+01  -2.4209958e+01   2.0000000e+02   9.8768262e+00  -8.2197679e+00  -4.1671094e+00
   2.1660100e+01  -2.4298196e+01   2.0000000e+02   9.8969363e+00  -8.0694937e+00  -4.5203473e+00
   2.1571427e+01  -2.4397046e+01   2.0000000e+02   9.8009464e+00  -7.9015069e+00  -5.0197737e+00
   2.1496626e+01  -2.4505033e+01   2.0000000e+02   9.5850057e+00  -7.7281118e+00  -5.6354969e+00
   2.1436852e+01  -2.4620542e+01   2.0000000e+02   9.2548738e+00  -7.5560981e+00  -6.3354860e+00
   2.1393044e+01  -2.4741841e+01   2.0000000e+02   8.8239882e+00  -7.3860365e+00  -7.0912255e+00
   2.1365907e+01  -2.4867105e+01   2.0000000e+02   8.3094447e+00  -7.2126839e+00  -7.8814966e+00
   2.1355902e+01  -2.4994445e+01   2.0000000e+02   7.7272784e+00  -7.0258939e+00  -8.6928673e+00
   2.1363232e+01  -2.5121935e+01   2.0000000e+02   7.0888821e+00  -6.8116353e+00  -9.5166873e+00
   2.1387842e+01  -2.5247641e+01   2.0000000e+02   6.3998902e+00  -6.5532084e+00  -1.0344031e+01
   2.1429408e+01  -2.5369649e+01   2.0000000e+02   5.6619377e+00  -6.2332449e+00  -1.1160758e+01
   2.1487346e+01  -2.5486095e+01   2.0000000e+02   4.8764256e+00  -5.8367618e+00  -1.1945120e+01
   2.1560817e+01  -2.5595198e+01   2.0000000e+02   4.0486507e+00  -5.3547883e+00  -1.2669238e+01
   2.1648732e+01  -2.5695281e+01   2.0000000e+02   3.1905460e+00  -4.7872167e+00  -1.3304155e+01
   2.1749773e+01  -2.5784802e+01   2.0000000e+02   2.3206856e+00  -4.1432679e+00  -1.3826606e+01
   2.1862409e+01  -2.5862380e+01   2.0000000e+02   1.4617780e+00  -3.4391222e+00  -1.4224382e+01
   2.1984918e+01  -2.5926814e+01   2.0000000e+02   6.3699744e-01  -2.6937051e+00  -1.4497880e+01
   2.2115417e+01  -2.5977106e+01   2.0000000e+02  -1.3316507e-01  -1.9246741e+00  -1.4657367e+01
   2.2251889e+01  -2.6012474e+01   2.0000000e+02  -8.3230556e-01  -1.1465996e+00  -1.4717618e+01
   2.2392219e+01  -2.6032368e+01   2.0000000e+02  -1.4480418e+00  -3.7181545e-01  -1.4692756e+01
   2.2534225e+01  -2.6036480e+01   2.0000000e+02  -1.9714023e+00   3.8694275e-01  -1.4593558e+01
   2.2675699e+01  -2.6024745e+01   2.0000000e+02  -2.3966913e+00   1.1139336e+00  -1.4427962e+01
   2.2814440e+01  -2.5997346e+01   2.0000000e+02  -2.7220718e+00   1.7892888e+00  -1.4203950e+01
   2.2948295e+01  -2.5954709e+01   2.0000000e+02  -2.9501763e+00   2.3899503e+00  -1.3933186e+01
   2.3075191e+01  -2.5897496e+01   2.0000000e+02  -3.0877532e+00   2.8921813e+00  -1.3633800e+01
   2.3193172e+01  -2.5826595e+01   2.0000000e+02  -3.1437505e+00   3.2747263e+00  -1.3331121e+01
   2.3300428e+01  -2.5743104e+01   2.0000000e+02  -3.1259145e+00   3.5214447e+00  -1.3055839e+01
   2.3766996e+01  -2.5206421e+01   2.0000000e+02  -2.5128958e+00   3.3897133e+00  -1.2219059e+01
   2.3783719e+01  -2.5078890e+01   2.0000000e+02  -1.9139395e+00   2.8186455e+00  -1.2459840e+01
   2.3784834e+01  -2.4950467e+01   2.0000000e+02  -1.1877527e+00   2.1436128e+00  -1.2679566e+01
   2.3770378e+01  -2.4822711e+01   2.0000000e+02  -3.5321642e-01   1.3721908e+00  -1.2822237e+01
   2.3740574e+01  -2.4697168e+01   2.0000000e+02   5.5710448e-01   5.1656713e-01  -1.2840654e+01
   2.3695825e+01  -2.4575353e+01   2.0000000e+02   1.5031713e+00  -4.0539699e-01  -1.2702992e+01
   2.3636712e+01  -2.4458730e+01   2.0000000e+02   2.4446903e+00  -1.3705303e+00  -1.2395195e+01
   2.3563983e+01  -2.4348698e+01   2.0000000e+02   3.3471114e+00  -2.3520646e+00  -1.1919742e+01
   2.3478542e+01  -2.4246574e+01   2.0000000e+02   4.1852647e+00  -3.3221082e+00  -1.1292228e+01
   2.3381437e+01  -2.4153577e+01   2.0000000e+02   4.9445738e+00  -4.2541191e+00  -1.0537330e+01
   2.3273847e+01  -2.4070813e+01   2.0000000e+02   5.6204115e+00  -5.1248471e+00  -9.6852124e+00
   2.3157070e+01  -2.3999268e+01   2.0000000e+02   6.2162922e+00  -5.9155752e+00  -8.7689282e+00
   2.3032504e+01  -2.3939789e+01   2.0000000e+02   6.7416208e+00  -6.6129358e+00  -7.8225675e+00
   2.2901635e+01  -2.3893081e+01   2.0000000e+02   7.2093136e+00  -7.2092514e+00  -6.8799783e+00
   2.2766016e+01  -2.3859698e+01   2.0000000e+02   7.6336388e+00  -7.7024456e+00  -5.9734257e+00
   2.2627254e+01  -2.3840034e+01   2.0000000e+02   8.0282025e+00  -8.0951419e+00  -5.1322389e+00
   2.2486990e+01  -2.3834322e+01   2.0000000e+02   8.4040681e+00  -8.3929184e+00  -4.3818701e+00
   2.2346878e+01  -2.3842629e+01   2.0000000e+02   8.7679896e+00  -8.6022435e+00  -3.7438343e+00
   2.2208576e+01  -2.3864856e+01   2.0000000e+02   9.1208684e+00  -8.7290373e+00  -3.2366799e+00
   2.2073717e+01  -2.3900742e+01   2.0000000e+02   9.4568105e+00  -8.7787489e+00  -2.8770038e+00
   2.1943900e+01  -2.3949862e+01   2.0000000e+02   9.7630572e+00  -8.7578643e+00  -2.6793898e+00
   2.1820668e+01  -2.4011634e+01   2.0000000e+02   1.0021196e+01  -8.6757966e+00  -2.6545186e+00
   2.1705490e+01  -2.4085325e+01   2.0000000e+02   1.0209677e+01  -8.5457615e+00  -2.8059741e+00
   2.1599747e+01  -2.4170063e+01   2.0000000e+02   1.0307307e+01  -8.3838466e+00  -3.1273573e+00
   2.1504717e+01  -2.4264838e+01   2.0000000e+02   1.0297074e+01  -8.2066192e+00  -3.6011798e+00
   2.1421556e+01  -2.4368522e+01   2.0000000e+02   1.0169380e+01  -8.0282360e+00  -4.2006528e+00
   2.1351286e+01  -2.4479876e+01   2.0000000e+02   9.9238460e+00  -7.8582113e+00  -4.8938444e+00
   2.1294783e+01  -2.4597569e+01   2.0000000e+02   9.5690739e+00  -7.7004022e+00  -5.6491889e+00
   2.1252763e+01  -2.4720187e+01   2.0000000e+02   9.1203197e+00  -7.5532438e+00  -6.4404719e+00
   2.1225776e+01  -2.4846255e+01   2.0000000e+02   8.5955814e+00  -7.4106795e+00  -7.2499316e+00
   2.1214194e+01  -2.4974252e+01   2.0000000e+02   8.0113615e+00  -7.2631382e+00  -8.0683209e+00
   2.1218203e+01  -2.5102628e+01   2.0000000e+02   7.3793985e+00  -7.0981042e+00  -8.8921114e+00
   2.1237805e+01  -2.5229823e+01   2.0000000e+02   6.7053588e+00  -6.9004161e+00  -9.7188614e+00
   2.1272810e+01  -2.5354289e+01   2.0000000e+02   5.9898315e+00  -6.6529845e+00  -1.0542263e+01
   2.1322835e+01  -2.5474505e+01   2.0000000e+02   5.2312637e+00  -6.3386191e+00  -1.1348579e+01
   2.1387313e+01  -2.5588997e+01   2.0000000e+02   4.4297646e+00  -5.9430390e+00  -1.2115939e+01
   2.1465492e+01  -2.5696358e+01   2.0000000e+02   3.5904680e+00  -5.4583343e+00  -1.2816974e+01
   2.1556443e+01  -2.5795263e+01   2.0000000e+02   2.7251868e+00  -4.8854328e+00  -1.3424181e+01
   2.1659074e+01  -2.5884489e+01   2.0000000e+02   1.8516493e+00  -4.2342651e+00  -1.3916211e+01
   2.1772138e+01  -2.5962932e+01   2.0000000e+02   9.9075637e-01  -3.5213511e+00  -1.4282550e+01
   2.1894251e+01  -2.6029616e+01   2.0000000e+02   1.6313589e-01  -2.7657245e+00  -1.4524781e+01
   2.2023907e+01  -2.6083711e+01   2.0000000e+02  -6.1358799e-01  -1.9849845e+00  -1.4654101e+01
   2.2159501e+01  -2.6124543e+01   2.0000000e+02  -1.3258073e+00  -1.1931260e+00  -1.4686424e+01
   2.2299346e+01  -2.6151603e+01   2.0000000e+02  -1.9633795e+00  -4.0083103e-01  -1.4637336e+01
   2.2441699e+01  -2.6164552e+01   2.0000000e+02  -2.5185029e+00   3.8242772e-01  -1.4518849e+01
   2.2584779e+01  -2.6163228e+01   2.0000000e+02  -2.9850865e+00   1.1457455e+00  -1.4338797e+01
   2.2726800e+01  -2.6147648e+01   2.0000000e+02  -3.3591673e+00   1.8750164e+00  -1.4102507e+01
   2.2865988e+01  -2.6118006e+01   2.0000000e+02  -3.6400262e+00   2.5525983e+00  -1.3815756e+01
   2.3000608e+01  -2.6074673e+01   2.0000000e+02  -3.8312968e+00   3.1585711e+00  -1.3487828e+01
   2.3128985e+01  -2.6018190e+01   2.0000000e+02  -3.9410482e+00   3.6729555e+00  -1.3133787e+01
   2.3249532e+01  -2.5949261e+01   2.0000000e+02  -3.9803981e+00   4.0782580e+00  -1.2775316e+01
   2.3360764e+01  -2.5868743e+01   2.0000000e+02  -3.9606452e+00   4.3614894e+00  -1.2439856e+01
   2.3461321e+01  -2.5777637e+01   2.0000000e+02  -3.8896482e+00   4.5152719e+00  -1.2157890e+01
   2.3549984e+01  -2.5677070e+01   2.0000000e+02  -3.7683443e+00   4.5377006e+00  -1.1958633e+01
   2.3625690e+01  -2.5568286e+01   2.0000000e+02  -3.5886726e+00   4.4312055e+00  -1.1864481e+01
   2.3687542e+01  -2.5452625e+01   2.0000000e+02  -3.3339084e+00   4.2007233e+00  -1.1885101e+01
   2.3734822e+01  -2.5331509e+01   2.0000000e+02  -2.9822049e+00   3.8518764e+00  -1.2012506e+01
   2.3875586e+01  -2.4659982e+01   2.0000000e+02   1.1009271e-01   1.0522728e+00  -1.2525289e+01
   2.3830879e+01  -2.4537575e+01   2.0000000e+02   1.0506575e+00   1.4349589e-01  -1.2463698e+01
   2.3773097e+01  -2.4419804e+01   2.0000000e+02   1.9860401e+00  -8.1379405e-01  -1.2235422e+01
   2.3702841e+01  -2.4307823e+01   2.0000000e+02   2.8842801e+00  -1.7961637e+00  -1.1841326e+01
   2.3620832e+01  -2.4202727e+01   2.0000000e+02   3.7214222e+00  -2.7784452e+00  -1.1293331e+01
   2.3527895e+01  -2.4105543e+01   2.0000000e+02   4.4825900e+00  -3.7360804e+00  -1.0611108e+01
   2.3424960e+01  -2.4017218e+01   2.0000000e+02   5.1616304e+00  -4.6468761e+00  -9.8191315e+00
   2.3313046e+01  -2.3938609e+01   2.0000000e+02   5.7599408e+00  -5.4921530e+00  -8.9444630e+00
   2.3193253e+01  -2.3870480e+01   2.0000000e+02   6.2847769e+00  -6.2573070e+00  -8.0153948e+00
   2.3066752e+01  -2.3813490e+01   2.0000000e+02   6.7474697e+00  -6.9322007e+00  -7.0606159e+00
   2.2934774e+01  -2.3768190e+01   2.0000000e+02   7.1617287e+00  -7.5114207e+00  -6.1085482e+00
   2.2798599e+01  -2.3735020e+01   2.0000000e+02   7.5421162e+00  -7.9942343e+00  -5.1864281e+00
   2.2659544e+01  -2.3714297e+01   2.0000000e+02   7.9026107e+00  -8.3838948e+00  -4.3190850e+00
   2.2518950e+01  -2.3706224e+01   2.0000000e+02   8.2551774e+00  -8.6860409e+00  -3.5281338e+00
   2.2378173e+01  -2.3710877e+01   2.0000000e+02   8.6083003e+00  -8.9066908e+00  -2.8319142e+00
   2.2238571e+01  -2.3728212e+01   2.0000000e+02   8.9656061e+00  -9.0506239e+00  -2.2466466e+00
   2.2101491e+01  -2.3758062e+01   2.0000000e+02   9.3247464e+00  -9.1211492e+00  -1.7879845e+00
   2.1968257e+01  -2.3800137e+01   2.0000000e+02   9.6768207e+00  -9.1214963e+00  -1.4718461e+00
   2.1840160e+01  -2.3854033e+01   2.0000000e+02   1.0006650e+01  -9.0571052e+00  -1.3135215e+00
   2.1718445e+01  -2.3919227e+01   2.0000000e+02   1.0294118e+01  -8.9375238e+00  -1.3247168e+00
   2.1604300e+01  -2.3995088e+01   2.0000000e+02   1.0516577e+01  -8.7766838e+00  -1.5098673e+00
   2.1498847e+01  -2.4080881e+01   2.0000000e+02   1.0652004e+01  -8.5913558e+00  -1.8631494e+00
   2.1403126e+01  -2.4175771e+01   2.0000000e+02   1.0682365e+01  -8.3984320e+00  -2.3675388e+00
   2.1318092e+01  -2.4278837e+01   2.0000000e+02   1.0596472e+01  -8.2120874e+00  -2.9965791e+00
   2.1244599e+01  -2.4389071e+01   2.0000000e+02   1.0391813e+01  -8.0417786e+00  -3.7181205e+00
   2.1183398e+01  -2.4505397e+01   2.0000000e+02   1.0074720e+01  -7.8914494e+00  -4.4994845e+00
   2.1135123e+01  -2.4626673e+01   2.0000000e+02   9.6588181e+00  -7.7599746e+00  -5.3123145e+00
   2.1100284e+01  -2.4751708e+01   2.0000000e+02   9.1619317e+00  -7.6423437e+00  -6.1361880e+00
   2.1079268e+01  -2.4879269e+01   2.0000000e+02   8.6022928e+00  -7.5309299e+00  -6.9598726e+00
   2.1072323e+01  -2.5008094e+01   2.0000000e+02   7.9950785e+00  -7.4162178e+00  -7.7800646e+00
   2.1079564e+01  -2.5136907e+01   2.0000000e+02   7.3501189e+00  -7.2867543e+00  -8.5981869e+00
   2.1100962e+01  -2.5264425e+01   2.0000000e+02   6.6713521e+00  -7.1287411e+00  -9.4159714e+00
   2.1136349e+01  -2.5389375e+01   2.0000000e+02   5.9579482e+00  -6.9260124e+00  -1.0231155e+01
   2.1185413e+01  -2.5510507e+01   2.0000000e+02   5.2068640e+00  -6.6612019e+00  -1.1034215e+01
   2.1247702e+01  -2.5626604e+01   2.0000000e+02   4.4161524e+00  -6.3182927e+00  -1.1807240e+01
   2.1322627e+01  -2.5736496e+01   2.0000000e+02   3.5880558e+00  -5.8859943e+00  -1.2525554e+01
   2.1409465e+01  -2.5839073e+01   2.0000000e+02   2.7308948e+00  -5.3607529e+00  -1.3161915e+01
   2.1507366e+01  -2.5933295e+01   2.0000000e+02   1.8590427e+00  -4.7480860e+00  -1.3692183e+01
   2.1615363e+01  -2.6018206e+01   2.0000000e+02   9.9090789e-01  -4.0614944e+00  -1.4100573e+01
   2.1732377e+01  -2.6092940e+01   2.0000000e+02   1.4581367e-01  -3.3193085e+00  -1.4382589e+01
   2.1857230e+01  -2.6156734e+01   2.0000000e+02  -6.5905749e-01  -2.5406269e+00  -1.4544677e+01
   2.1988659e+01  -2.6208937e+01   2.0000000e+02  -1.4104049e+00  -1.7419852e+00  -1.4600931e+01
   2.2125326e+01  -2.6249014e+01   2.0000000e+02  -2.0987848e+00  -9.3593045e-01  -1.4568379e+01
   2.2265835e+01  -2.6276554e+01   2.0000000e+02  -2.7173879e+00  -1.3162684e-01  -1.4462697e+01
   2.2408747e+01  -2.6291274e+01   2.0000000e+02  -3.2605427e+00   6.6312400e-01  -1.4295666e+01
   2.2552596e+01  -2.6293022e+01   2.0000000e+02  -3.7229306e+00   1.4395842e+00  -1.4074771e+01
   2.2695905e+01  -2.6281782e+01   2.0000000e+02  -4.0999721e+00   2.1864896e+00  -1.3804520e+01
   2.2837204e+01  -2.6257668e+01   2.0000000e+02  -4.3891086e+00   2.8896261e+00  -1.3488720e+01
   2.2975043e+01  -2.6220927e+01   2.0000000e+02  -4.5914029e+00   3.5325781e+00  -1.3132921e+01
   2.3108015e+01  -2.6171938e+01   2.0000000e+02  -4.7125842e+00   4.0983370e+00  -1.2746478e+01
   2.3234764e+01  -2.6111201e+01   2.0000000e+02  -4.7628039e+00   4.5711603e+00  -1.2343986e+01
   2.3354006e+01  -2.6039339e+01   2.0000000e+02  -4.7551116e+00   4.9384563e+00  -1.1945635e+01
   2.3464538e+01  -2.5957085e+01   2.0000000e+02  -4.7026656e+00   5.1920474e+00  -1.1576512e+01
   2.3565255e+01  -2.5865276e+01   2.0000000e+02  -4.6154188e+00   5.3286923e+00  -1.1264613e+01
   2.3655157e+01  -2.5764847e+01   2.0000000e+02  -4.4969046e+00   5.3496601e+00  -1.1037723e+01
   2.3733362e+01  -2.5656816e+01   2.0000000e+02  -4.3419498e+00   5.2595125e+00  -1.0919243e+01
   2.3799113e+01  -2.5542275e+01   2.0000000e+02  -4.1361960e+00   5.0643631e+00  -1.0923344e+01
   2.3851784e+01  -2.5422380e+01   2.0000000e+02  -3.8581163e+00   4.7700187e+00  -1.1050276e+01
   2.3890885e+01  -2.5298334e+01   2.0000000e+02  -3.4836573e+00   4.3804944e+00  -1.1283223e+01
   2.3916068e+01  -2.5171383e+01   2.0000000e+02  -2.9927641e+00   3.8975278e+00  -1.1588081e+01
   2.3927125e+01  -2.5042792e+01   2.0000000e+02  -2.3757717e+00   3.3212364e+00  -1.1917205e+01
   2.3923990e+01  -2.4913844e+01   2.0000000e+02  -1.6376745e+00   2.6520454e+00  -1.2216371e+01
   2.3906739e+01  -2.4785818e+01   2.0000000e+02  -7.9849959e-01   1.8930714e+00  -1.2433320e+01
   2.3728573e+01  -2.4121189e+01   2.0000000e+02   3.5432068e+00  -2.6028010e+00  -1.1011822e+01
   2.3635549e+01  -2.4023575e+01   2.0000000e+02   4.2721799e+00  -3.5626543e+00  -1.0364058e+01
   2.3533333e+01  -2.3934023e+01   2.0000000e+02   4.9205132e+00  -4.4811885e+00  -9.6074049e+00
   2.3422770e+01  -2.3853255e+01   2.0000000e+02   5.4896903e+00  -5.3414891e+00  -8.7645957e+00
   2.3304766e+01  -2.3781924e+01   2.0000000e+02   5.9863091e+00  -6.1299980e+00  -7.8592046e+00
   2.3180283e+01  -2.3720604e+01   2.0000000e+02   6.4207184e+00  -6.8366671e+00  -6.9151935e+00
   2.3050332e+01  -2.3669791e+01   2.0000000e+02   6.8057287e+00  -7.4551791e+00  -5.9567149e+00
   2.2915960e+01  -2.3629891e+01   2.0000000e+02   7.1554877e+00  -7.9832454e+00  -5.0075416e+00
   2.2778251e+01  -2.3601225e+01   2.0000000e+02   7.4843933e+00  -8.4224382e+00  -4.0902351e+00
   2.2638311e+01  -2.3584025e+01   2.0000000e+02   7.8060370e+00  -8.7773566e+00  -3.2249951e+00
   2.2497262e+01  -2.3578427e+01   2.0000000e+02   8.1320261e+00  -9.0539476e+00  -2.4289750e+00
   2.2356235e+01  -2.3584476e+01   2.0000000e+02   8.4707677e+00  -9.2574794e+00  -1.7167299e+00
   2.2216360e+01  -2.3602125e+01   2.0000000e+02   8.8262854e+00  -9.3911286e+00  -1.1017285e+00
   2.2078760e+01  -2.3631230e+01   2.0000000e+02   9.1971893e+00  -9.4560142e+00  -5.9827533e-01
   2.1944540e+01  -2.3671560e+01   2.0000000e+02   9.5760531e+00  -9.4528510e+00  -2.2271381e-01
   2.1814781e+01  -2.3722789e+01   2.0000000e+02   9.9493552e+00  -9.3845797e+00   7.3730912e-03
   2.1690531e+01  -2.3784506e+01   2.0000000e+02   1.0298302e+01  -9.2585879e+00   7.5912220e-02
   2.1572798e+01  -2.3856215e+01   2.0000000e+02   1.0600556e+01  -9.0874225e+00  -2.7646849e-02
   2.1462542e+01  -2.3937336e+01   2.0000000e+02   1.0832754e+01  -8.8875981e+00  -3.0463865e-01
   2.1360668e+01  -2.4027215e+01   2.0000000e+02   1.0973435e+01  -8.6770141e+00  -7.4524996e-01
   2.1268016e+01  -2.4125126e+01   2.0000000e+02   1.1005896e+01  -8.4720120e+00  -1.3288008e+00
   2.1185358e+01  -2.4230273e+01   2.0000000e+02   1.0920497e+01  -8.2849698e+00  -2.0262326e+00
   2.1113392e+01  -2.4341804e+01   2.0000000e+02   1.0715955e+01  -8.1229442e+00  -2.8042588e+00
   2.1052731e+01  -2.4458811e+01   2.0000000e+02   1.0399305e+01  -7.9875559e+00  -3.6300309e+00
   2.1003903e+01  -2.4580337e+01   2.0000000e+02   9.9843537e+00  -7.8759126e+00  -4.4755692e+00
   2.0967340e+01  -2.4705388e+01   2.0000000e+02   9.4888886e+00  -7.7821394e+00  -5.3208615e+00
   2.0943381e+01  -2.4832937e+01   2.0000000e+02   8.9313567e+00  -7.6988799e+00  -6.1549783e+00
   2.0932261e+01  -2.4961935e+01   2.0000000e+02   8.3278045e+00  -7.6181371e+00  -6.9751601e+00
   2.0934113e+01  -2.5091316e+01   2.0000000e+02   7.6897645e+00  -7.5311470e+00  -7.7843094e+00
   2.0948962e+01  -2.5220008e+01   2.0000000e+02   7.0233525e+00  -7.4275018e+00  -8.5875508e+00
   2.0976725e+01  -2.5346941e+01   2.0000000e+02   6.3296209e+00  -7.2942007e+00  -9.3884880e+00
   2.1017212e+01  -2.5471057e+01   2.0000000e+02   5.6060262e+00  -7.1154651e+00  -1.0185782e+01
   2.1070124e+01  -2.5591318e+01   2.0000000e+02   4.8487958e+00  -6.8739299e+00  -1.0970700e+01
   2.1135052e+01  -2.5706714e+01   2.0000000e+02   4.0557462e+00  -6.5532384e+00  -1.1726400e+01
   2.1211486e+01  -2.5816275e+01   2.0000000e+02   3.2288293e+00  -6.1413727e+00  -1.2429530e+01
   2.1298812e+01  -2.5919076e+01   2.0000000e+02   2.3756921e+00  -5.6336717e+00  -1.3053943e+01
   2.1396318e+01  -2.6014246e+01   2.0000000e+02   1.5095599e+00  -5.0343164e+00  -1.3575810e+01
   2.1503202e+01  -2.6100978e+01   2.0000000e+02   6.4738683e-01  -4.3556102e+00  -1.3978522e+01
   2.1618575e+01  -2.6178534e+01   2.0000000e+02  -1.9304918e-01  -3.6152788e+00  -1.4255762e+01
   2.1741470e+01  -2.6246251e+01   2.0000000e+02  -9.9606322e-01  -2.8327255e+00  -1.4411797e+01
   2.1870849e+01  -2.6303553e+01   2.0000000e+02  -1.7499221e+00  -2.0256128e+00  -1.4459058e+01
   2.2005615e+01  -2.6349947e+01   2.0000000e+02  -2.4469643e+00  -1.2078989e+00  -1.4414162e+01
   2.2144619e+01  -2.6385037e+01   2.0000000e+02  -3.0824392e+00  -3.8967333e-01  -1.4293841e+01
   2.2286673e+01  -2.6408521e+01   2.0000000e+02  -3.6526621e+00   4.2151755e-01  -1.4112053e+01
   2.2430558e+01  -2.6420198e+01   2.0000000e+02  -4.1535833e+00   1.2187030e+00  -1.3878781e+01
   2.2575040e+01  -2.6419967e+01   2.0000000e+02  -4.5803366e+00   1.9937595e+00  -1.3600377e+01
   2.2718877e+01  -2.6407830e+01   2.0000000e+02  -4.9279535e+00   2.7364430e+00  -1.3280880e+01
   2.2860835e+01  -2.6383891e+01   2.0000000e+02  -5.1929285e+00   3.4343901e+00  -1.2923713e+01
   2.2999697e+01  -2.6348357e+01   2.0000000e+02  -5.3749934e+00   4.0738354e+00  -1.2533348e+01
   2.3134275e+01  -2.6301531e+01   2.0000000e+02  -5.4783745e+00   4.6407730e+00  -1.2116809e+01
   2.3263423e+01  -2.6243816e+01   2.0000000e+02  -5.5120994e+00   5.1223580e+00  -1.1684799e+01
   2.3386045e+01  -2.6175706e+01   2.0000000e+02  -5.4889986e+00   5.5082216e+00  -1.1252431e+01
   2.3501106e+01  -2.6097781e+01   2.0000000e+02  -5.4236602e+00   5.7915569e+00  -1.0839255e+01
   2.3607643e+01  -2.6010708e+01   2.0000000e+02  -5.3297060e+00   5.9697226e+00  -1.0468454e+01
   2.3704769e+01  -2.5915227e+01   2.0000000e+02  -5.2167613e+00   6.0441326e+00  -1.0165292e+01
   2.3791685e+01  -2.5812147e+01   2.0000000e+02  -5.0877846e+00   6.0195492e+00  -9.9545859e+00
   2.3867684e+01  -2.5702342e+01   2.0000000e+02  -4.9372290e+00   5.9027852e+00  -9.8573721e+00
   2.3932155e+01  -2.5586739e+01   2.0000000e+02  -4.7506601e+00   5.7010142e+00  -9.8869402e+00
   2.3984591e+01  -2.5466309e+01   2.0000000e+02  -4.5064568e+00   5.4200321e+00  -1.0044780e+01
   2.4024590e+01  -2.5342065e+01   2.0000000e+02  -4.1797610e+00   5.0628826e+00  -1.0317560e+01
   2.4051855e+01  -2.5215044e+01   2.0000000e+02  -3.7480630e+00   4.6292561e+00  -1.0676435e+01
   2.4066201e+01  -2.5086305e+01   2.0000000e+02  -3.1971834e+00   4.1161325e+00  -1.1079344e+01
   2.4067549e+01  -2.4956919e+01   2.0000000e+02  -2.5256719e+00   3.5194951e+00  -1.1476405e+01
   2.4055928e+01  -2.4827958e+01   2.0000000e+02  -1.7462238e+00   2.8367823e+00  -1.1816998e+01
   2.4031475e+01  -2.4700486e+01   2.0000000e+02  -8.8369764e-01   2.0693472e+00  -1.2056625e+01
   2.3994430e+01  -2.4575552e+01   2.0000000e+02   2.9386160e-02   1.2241783e+00  -1.2161821e+01
   2.3945134e+01  -2.4454183e+01   2.0000000e+02   9.5818229e-01   3.1441191e-01  -1.2112276e+01
   2.3884024e+01  -2.4337372e+01   2.0000000e+02   1.8702086e+00  -6.4151027e-01  -1.1900475e+01
   2.3811632e+01  -2.4226071e+01   2.0000000e+02   2.7384887e+00  -1.6216418e+00  -1.1529763e+01
   2.3375689e+01  -2.3671439e+01   2.0000000e+02   5.8000490e+00  -6.2343008e+00  -7.4091950e+00
   2.3252789e+01  -2.3610399e+01   2.0000000e+02   6.1823076e+00  -6.9301457e+00  -6.4907834e+00
   2.3124911e+01  -2.3558757e+01   2.0000000e+02   6.5187905e+00  -7.5462455e+00  -5.5513341e+00
   2.2992907e+01  -2.3516857e+01   2.0000000e+02   6.8225025e+00  -8.0801772e+00  -4.6104944e+00
   2.2857652e+01  -2.3484975e+01   2.0000000e+02   7.1070091e+00  -8.5328266e+00  -3.6872733e+00
   2.2720038e+01  -2.3463321e+01   2.0000000e+02   7.3856617e+00  -8.9079694e+00  -2.7990242e+00
   2.2580974e+01  -2.3452037e+01   2.0000000e+02   7.6707112e+00  -9.2110609e+00  -1.9605845e+00
   2.2441376e+01  -2.3451200e+01   2.0000000e+02   7.9723763e+00  -9.4474426e+00  -1.1841684e+00
   2.2302165e+01  -2.3460813e+01   2.0000000e+02   8.2978423e+00  -9.6206014e+00  -4.8035358e-01
   2.2164258e+01  -2.3480814e+01   2.0000000e+02   8.6503659e+00  -9.7312889e+00   1.3992107e-01
   2.2028563e+01  -2.3511070e+01   2.0000000e+02   9.0284571e+00  -9.7781583e+00   6.6336181e-01
   2.1895979e+01  -2.3551382e+01   2.0000000e+02   9.4253200e+00  -9.7598172e+00   1.0732773e+00
   2.1767383e+01  -2.3601484e+01   2.0000000e+02   9.8287293e+00  -9.6775531e+00   1.3505605e+00
   2.1643629e+01  -2.3661045e+01   2.0000000e+02   1.0221516e+01  -9.5374992e+00   1.4765265e+00
   2.1525543e+01  -2.3729670e+01   2.0000000e+02   1.0582801e+01  -9.3512962e+00   1.4368713e+00
   2.1413916e+01  -2.3806904e+01   2.0000000e+02   1.0889919e+01  -9.1349689e+00   1.2253737e+00
   2.1309500e+01  -2.3892235e+01   2.0000000e+02   1.1120747e+01  -8.9065220e+00   8.4619186e-01
   2.1213003e+01  -2.3985096e+01   2.0000000e+02   1.1256139e+01  -8.6831313e+00   3.1423406e-01
   2.1125086e+01  -2.4084868e+01   2.0000000e+02   1.1282113e+01  -8.4787232e+00  -3.4636192e-01
   2.1046355e+01  -2.4190885e+01   2.0000000e+02   1.1191506e+01  -8.3024069e+00  -1.1051951e+00
   2.0977359e+01  -2.4302438e+01   2.0000000e+02   1.0984761e+01  -8.1579345e+00  -1.9294594e+00
   2.0918587e+01  -2.4418778e+01   2.0000000e+02   1.0669605e+01  -8.0441482e+00  -2.7880001e+00
   2.0870461e+01  -2.4539125e+01   2.0000000e+02   1.0259528e+01  -7.9562222e+00  -3.6548802e+00
   2.0833338e+01  -2.4662665e+01   2.0000000e+02   9.7713785e+00  -7.8873457e+00  -4.5116460e+00
   2.0807500e+01  -2.4788566e+01   2.0000000e+02   9.2225833e+00  -7.8302821e+00  -5.3481108e+00
   2.0793157e+01  -2.4915972e+01   2.0000000e+02   8.6287669e+00  -7.7782905e+00  -6.1614880e+00
   2.0790442e+01  -2.5044017e+01   2.0000000e+02   8.0020470e+00  -7.7250630e+00  -6.9545869e+00
   2.0799410e+01  -2.5171828e+01   2.0000000e+02   7.3502296e+00  -7.6637780e+00  -7.7333697e+00
   2.0820036e+01  -2.5298531e+01   2.0000000e+02   6.6767487e+00  -7.5857318e+00  -8.5042999e+00
   2.0852214e+01  -2.5423255e+01   2.0000000e+02   5.9812711e+00  -7.4792504e+00  -9.2716329e+00
   2.0895760e+01  -2.5545142e+01   2.0000000e+02   5.2609027e+00  -7.3295335e+00  -1.0034933e+01
   2.0950406e+01  -2.5663350e+01   2.0000000e+02   4.5120267e+00  -7.1198347e+00  -1.0787141e+01
   2.1015807e+01  -2.5777060e+01   2.0000000e+02   3.7324804e+00  -6.8338572e+00  -1.1513945e+01
   2.1091539e+01  -2.5885481e+01   2.0000000e+02   2.9236373e+00  -6.4588438e+00  -1.2194855e+01
   2.1177102e+01  -2.5987858e+01   2.0000000e+02   2.0917308e+00  -5.9884212e+00  -1.2806122e+01
   2.1271924e+01  -2.6083476e+01   2.0000000e+02   1.2479292e+00  -5.4242553e+00  -1.3324917e+01
   2.1375364e+01  -2.6171663e+01   2.0000000e+02   4.0698324e-01  -4.7759106e+00  -1.3733659e+01
   2.1486712e+01  -2.6251800e+01   2.0000000e+02  -4.1524214e-01  -4.0589111e+00  -1.4023183e+01
   2.1605202e+01  -2.6323323e+01   2.0000000e+02  -1.2044505e+00  -3.2916172e+00  -1.4193807e+01
   2.1730011e+01  -2.6385727e+01   2.0000000e+02  -1.9498773e+00  -2.4920668e+00  -1.4254076e+01
   2.1860266e+01  -2.6438570e+01   2.0000000e+02  -2.6449250e+00  -1.6756532e+00  -1.4217881e+01
   2.1995052e+01  -2.6481479e+01   2.0000000e+02  -3.2864209e+00  -8.5418589e-01  -1.4101052e+01
   2.2133419e+01  -2.6514149e+01   2.0000000e+02  -3.8729280e+00  -3.6331279e-02  -1.3918476e+01
   2.2274388e+01  -2.6536348e+01   2.0000000e+02  -4.4029542e+00   7.7108436e-01  -1.3682372e+01
   2.2416960e+01  -2.6547918e+01   2.0000000e+02  -4.8736891e+00   1.5615573e+00  -1.3401815e+01
   2.2560121e+01  -2.6548777e+01   2.0000000e+02  -5.2806834e+00   2.3277235e+00  -1.3083206e+01
   2.2702855e+01  -2.6538919e+01   2.0000000e+02  -5.6185396e+00   3.0608633e+00  -1.2731177e+01
   2.2844148e+01  -2.6518414e+01   2.0000000e+02  -5.8823318e+00   3.7509910e+00  -1.2349591e+01
   2.2982999e+01  -2.6487408e+01   2.0000000e+02  -6.0693421e+00   4.3873920e+00  -1.1942414e+01
   2.3118424e+01  -2.6446121e+01   2.0000000e+02  -6.1805390e+00   4.9592992e+00  -1.1514566e+01
   2.3249467e+01  -2.6394845e+01   2.0000000e+02  -6.2213881e+00   5.4566803e+00  -1.1072751e+01
   2.3375208e+01  -2.6333945e+01   2.0000000e+02  -6.2017284e+00   5.8710567e+00  -1.0626242e+01
   2.3494767e+01  -2.6263850e+01   2.0000000e+02  -6.1346457e+00   6.1962645e+00  -1.0187506e+01
   2.3607312e+01  -2.6185057e+01   2.0000000e+02  -6.0346717e+00   6.4291128e+00  -9.7723347e+00
   2.3712068e+01  -2.6098119e+01   2.0000000e+02  -5.9154758e+00   6.5696892e+00  -9.3995036e+00
   2.3808315e+01  -2.6003648e+01   2.0000000e+02  -5.7874824e+00   6.6212421e+00  -9.0898566e+00
   2.3895402e+01  -2.5902307e+01   2.0000000e+02  -5.6556611e+00   6.5896409e+00  -8.8646998e+00
   2.3972745e+01  -2.5794804e+01   2.0000000e+02  -5.5178092e+00   6.4823619e+00  -8.7436088e+00
   2.4039831e+01  -2.5681889e+01   2.0000000e+02  -5.3637725e+00   6.3071570e+00  -8.7415266e+00
   2.4096225e+01  -2.5564347e+01   2.0000000e+02  -5.1760317e+00   6.0705344e+00  -8.8654725e+00
   2.4141569e+01  -2.5442993e+01   2.0000000e+02  -4.9319736e+00   5.7763347e+00  -9.1115395e+00
   2.4175583e+01  -2.5318666e+01   2.0000000e+02  -4.6078053e+00   5.4247990e+00  -9.4630135e+00
   2.4198068e+01  -2.5192222e+01   2.0000000e+02  -4.1834607e+00   5.0124858e+00  -9.8904939e+00
   2.4208907e+01  -2.5064529e+01   2.0000000e+02  -3.6472992e+00   4.5332185e+00  -1.0354476e+01
   2.4208062e+01  -2.4936463e+01   2.0000000e+02  -2.9992124e+00   3.9799392e+00  -1.0810078e+01
   2.4195575e+01  -2.4808896e+01   2.0000000e+02  -2.2511612e+00   3.3470463e+00  -1.1212777e+01
   2.4171566e+01  -2.4682697e+01   2.0000000e+02  -1.4251534e+00   2.6326981e+00  -1.1523628e+01
   2.4136234e+01  -2.4558721e+01   2.0000000e+02  -5.4942464e-01   1.8404224e+00  -1.1712810e+01
   2.4089849e+01  -2.4437808e+01   2.0000000e+02   3.4580081e-01   9.7968579e-01  -1.1761069e+01
   2.4032755e+01  -2.4320772e+01   2.0000000e+02   1.2318727e+00   6.5322534e-02  -1.1659349e+01
   2.3965366e+01  -2.4208401e+01   2.0000000e+02   2.0840780e+00  -8.8393877e-01  -1.1407439e+01
   2.3888159e+01  -2.4101448e+01   2.0000000e+02   2.8829956e+00  -1.8475126e+00  -1.1012230e+01
   2.3801674e+01  -2.4000630e+01   2.0000000e+02   3.6150319e+00  -2.8049016e+00  -1.0485924e+01
   2.3706508e+01  -2.3906619e+01   2.0000000e+02   4.2725189e+00  -3.7372641e+00  -9.8442750e+00
   2.3603315e+01  -2.3820042e+01   2.0000000e+02   4.8533412e+00  -4.6282338e+00  -9.1050865e+00
   2.3492793e+01  -2.3741475e+01   2.0000000e+02   5.3602821e+00  -5.4642238e+00  -8.2870512e+00
   2.2885146e+01  -2.3358892e+01   2.0000000e+02   6.7729996e+00  -8.7719714e+00  -3.0019155e+00
   2.2747192e+01  -2.3336925e+01   2.0000000e+02   7.0098349e+00  -9.1415470e+00  -2.1051767e+00
   2.2607843e+01  -2.3324592e+01   2.0000000e+02   7.2575601e+00  -9.4451149e+00  -1.2476953e+00
   2.2467885e+01  -2.3321961e+01   2.0000000e+02   7.5269009e+00  -9.6878637e+00  -4.3926335e-01
   2.2328108e+01  -2.3329048e+01   2.0000000e+02   7.8261349e+00  -9.8729516e+00   3.1197297e-01
   2.2189302e+01  -2.3345813e+01   2.0000000e+02   8.1603065e+00  -1.0000417e+01   9.9753468e-01
   2.2052250e+01  -2.3372160e+01   2.0000000e+02   8.5305131e+00  -1.0067466e+01   1.6062597e+00
   2.1917727e+01  -2.3407942e+01   2.0000000e+02   8.9332886e+00  -1.0070269e+01   2.1225916e+00
   2.1786497e+01  -2.3452954e+01   2.0000000e+02   9.3601439e+00  -1.0006781e+01   2.5266687e+00
   2.1659305e+01  -2.3506944e+01   2.0000000e+02   9.7975730e+00  -9.8794201e+00   2.7963870e+00
   2.1536875e+01  -2.3569604e+01   2.0000000e+02   1.0227561e+01  -9.6966045e+00   2.9111847e+00
   2.1419911e+01  -2.3640580e+01   2.0000000e+02   1.0628815e+01  -9.4724633e+00   2.8561094e+00
   2.1309083e+01  -2.3719467e+01   2.0000000e+02   1.0978549e+01  -9.2249658e+00   2.6252904e+00
   2.1205035e+01  -2.3805818e+01   2.0000000e+02   1.1254573e+01  -8.9731593e+00   2.2235217e+00
   2.1108372e+01  -2.3899139e+01   2.0000000e+02   1.1437453e+01  -8.7344136e+00   1.6662590e+00
   2.1019662e+01  -2.3998898e+01   2.0000000e+02   1.1512464e+01  -8.5222604e+00   9.7783386e-01
   2.0939431e+01  -2.4104524e+01   2.0000000e+02   1.1471135e+01  -8.3451193e+00   1.8868005e-01
   2.0868161e+01  -2.4215411e+01   2.0000000e+02   1.1312129e+01  -8.2059289e+00  -6.6819623e-01
   2.0806283e+01  -2.4330923e+01   2.0000000e+02   1.1041164e+01  -8.1026374e+00  -1.5609458e+00
   2.0754180e+01  -2.4450392e+01   2.0000000e+02   1.0669877e+01  -8.0294519e+00  -2.4621862e+00
   2.0712181e+01  -2.4573129e+01   2.0000000e+02   1.0213740e+01  -7.9785666e+00  -3.3513844e+00
   2.0680558e+01  -2.4698422e+01   2.0000000e+02   9.6896100e+00  -7.9419647e+00  -4.2157041e+00
   2.0659528e+01  -2.4825544e+01   2.0000000e+02   9.1134691e+00  -7.9127489e+00  -5.0495856e+00
   2.0649244e+01  -2.4953753e+01   2.0000000e+02   8.4988798e+00  -7.8856008e+00  -5.8532889e+00
   2.0649800e+01  -2.5082300e+01   2.0000000e+02   7.8561530e+00  -7.8562197e+00  -6.6311808e+00
   2.0661227e+01  -2.5210431e+01   2.0000000e+02   7.1921068e+00  -7.8199767e+00  -7.3899114e+00
   2.0683492e+01  -2.5337393e+01   2.0000000e+02   6.5101295e+00  -7.7702791e+00  -8.1366147e+00
   2.0716498e+01  -2.5462436e+01   2.0000000e+02   5.8105262e+00  -7.6972704e+00  -8.8769358e+00
   2.0760083e+01  -2.5584819e+01   2.0000000e+02   5.0912345e+00  -7.5874303e+00  -9.6129267e+00
   2.0814019e+01  -2.5703817e+01   2.0000000e+02   4.3490595e+00  -7.4244161e+00  -1.0341111e+01
   2.0878018e+01  -2.5818719e+01   2.0000000e+02   3.5814448e+00  -7.1911206e+00  -1.1051306e+01
   2.0951725e+01  -2.5928839e+01   2.0000000e+02   2.7883382e+00  -6.8725749e+00  -1.1726809e+01
   2.1034725e+01  -2.6033518e+01   2.0000000e+02   1.9737315e+00  -6.4589068e+00  -1.2346294e+01
   2.1126546e+01  -2.6132125e+01   2.0000000e+02   1.1462700e+00  -5.9475180e+00  -1.2887169e+01
   2.1226655e+01  -2.6224067e+01   2.0000000e+02   3.1851850e-01  -5.3437878e+00  -1.3329593e+01
   2.1334468e+01  -2.6308787e+01   2.0000000e+02  -4.9491735e-01  -4.6600110e+00  -1.3660072e+01
   2.1449347e+01  -2.6385773e+01   2.0000000e+02  -1.2799672e+00  -3.9129879e+00  -1.3873477e+01
   2.1570610e+01  -2.6454557e+01   2.0000000e+02  -2.0254005e+00  -3.1210025e+00  -1.3973064e+01
   2.1697530e+01  -2.6514720e+01   2.0000000e+02  -2.7241475e+00  -2.3011909e+00  -1.3968651e+01
   2.1829343e+01  -2.6565895e+01   2.0000000e+02  -3.3732624e+00  -1.4678848e+00  -1.3873838e+01
   2.1965251e+01  -2.6607770e+01   2.0000000e+02  -3.9726962e+00  -6.3221186e-01  -1.3703202e+01
   2.2104427e+01  -2.6640090e+01   2.0000000e+02  -4.5234549e+00   1.9729523e-01  -1.3470224e+01
   2.2246024e+01  -2.6662655e+01   2.0000000e+02  -5.0258040e+00   1.0135508e+00  -1.3186255e+01
   2.2389175e+01  -2.6675328e+01   2.0000000e+02  -5.4780854e+00   1.8097290e+00  -1.2860377e+01
   2.2533005e+01  -2.6678032e+01   2.0000000e+02  -5.8763646e+00   2.5784966e+00  -1.2499871e+01
   2.2676632e+01  -2.6670749e+01   2.0000000e+02  -6.2149519e+00   3.3117575e+00  -1.2110845e+01
   2.2819178e+01  -2.6653524e+01   2.0000000e+02  -6.4876912e+00   4.0009354e+00  -1.1698677e+01
   2.2959771e+01  -2.6626464e+01   2.0000000e+02  -6.6895956e+00   4.6373988e+00  -1.1268290e+01
   2.3097552e+01  -2.6589733e+01   2.0000000e+02  -6.8184595e+00   5.2128752e+00  -1.0824411e+01
   2.3231682e+01  -2.6543556e+01   2.0000000e+02  -6.8760811e+00   5.7197983e+00  -1.0371961e+01
   2.3361348e+01  -2.6488215e+01   2.0000000e+02  -6.8687135e+00   6.1516282e+00  -9.9167484e+00
   2.3485766e+01  -2.6424049e+01   2.0000000e+02  -6.8066871e+00   6.5032623e+00  -9.4662623e+00
   2.3604188e+01  -2.6351448e+01   2.0000000e+02  -6.7032557e+00   6.7715266e+00  -9.0303599e+00
   2.3715908e+01  -2.6270853e+01   2.0000000e+02  -6.5729242e+00   6.9556238e+00  -8.6215885e+00
   2.3820262e+01  -2.6182753e+01   2.0000000e+02  -6.4294700e+00   7.0573653e+00  -8.2551513e+00
   2.3916638e+01  -2.6087682e+01   2.0000000e+02  -6.2839270e+00   7.0811472e+00  -7.9483418e+00
   2.4004476e+01  -2.5986214e+01   2.0000000e+02  -6.1426887e+00   7.0335512e+00  -7.7195527e+00
   2.4083268e+01  -2.5878959e+01   2.0000000e+02  -6.0059549e+00   6.9225889e+00  -7.5867086e+00
   2.4152569e+01  -2.5766561e+01   2.0000000e+02  -5.8668051e+00   6.7566153e+00  -7.5650066e+00
   2.4211992e+01  -2.5649693e+01   2.0000000e+02  -5.7111779e+00   6.5429476e+00  -7.6643053e+00
   2.4261212e+01  -2.5529053e+01   2.0000000e+02  -5.5191582e+00   6.2864541e+00  -7.8863209e+00
   2.4299968e+01  -2.5405359e+01   2.0000000e+02  -5.2677049e+00   5.9884095e+00  -8.2223551e+00
   2.4328063e+01  -2.5279343e+01   2.0000000e+02  -4.9345635e+00   5.6459616e+00  -8.6523166e+00
   2.4345364e+01  -2.5151752e+01   2.0000000e+02  -4.5026469e+00   5.2525005e+00  -9.1456030e+00
   2.4351805e+01  -2.5023336e+01   2.0000000e+02  -3.9637161e+00   4.7989317e+00  -9.6640629e+00
   2.4347380e+01  -2.4894850e+01   2.0000000e+02  -3.3203288e+00   4.2757124e+00  -1.0166447e+01
   2.4332151e+01  -2.4767047e+01   2.0000000e+02  -2.5855035e+00   3.6752224e+00  -1.0613198e+01
   2.4306238e+01  -2.4640673e+01   2.0000000e+02  -1.7802864e+00   2.9938872e+00  -1.0970492e+01
   2.4269825e+01  -2.4516463e+01   2.0000000e+02  -9.3029713e-01   2.2336630e+00  -1.1212544e+01
   2.4223154e+01  -2.4395138e+01   2.0000000e+02  -6.2286519e-02   1.4024922e+00  -1.1322284e+01
   2.4166523e+01  -2.4277400e+01   2.0000000e+02   7.9847726e-01   5.1370976e-01  -1.1290825e+01
   2.4100285e+01  -2.4163929e+01   2.0000000e+02   1.6298151e+00  -4.1538806e-01  -1.1116424e+01
   2.4024848e+01  -2.4055378e+01   2.0000000e+02   2.4135297e+00  -1.3654556e+00  -1.0803346e+01
   2.3940665e+01  -2.3952370e+01   2.0000000e+02   3.1359617e+00  -2.3170741e+00  -1.0360701e+01
   2.3848239e+01  -2.3855496e+01   2.0000000e+02   3.7882486e+00  -3.2522569e+00  -9.8011590e+00
   2.3748115e+01  -2.3765309e+01   2.0000000e+02   4.3663828e+00  -4.1553981e+00  -9.1395772e+00
   2.3640879e+01  -2.3682323e+01   2.0000000e+02   4.8708667e+00  -5.0134975e+00  -8.3917998e+00
   2.3527155e+01  -2.3607013e+01   2.0000000e+02   5.3060734e+00  -5.8159484e+00  -7.5739028e+00
   2.3407598e+01  -2.3539804e+01   2.0000000e+02   5.6794740e+00  -6.5542763e+00  -6.7019129e+00
   2.3282895e+01  -2.3481081e+01   2.0000000e+02   6.0008604e+00  -7.2219681e+00  -5.7920766e+00
   2.3153759e+01  -2.3431174e+01   2.0000000e+02   6.2817175e+00  -7.8147552e+00  -4.8609818e+00
   2.3020924e+01  -2.3390368e+01   2.0000000e+02   6.5346889e+00  -8.3310000e+00  -3.9254706e+00
   2.2313461e+01  -2.3201601e+01   2.0000000e+02   7.3590361e+00  -1.0141080e+01   1.2268815e+00
   2.2174341e+01  -2.3218180e+01   2.0000000e+02   7.6775410e+00  -1.0268742e+01   1.9520017e+00
   2.2036814e+01  -2.3243714e+01   2.0000000e+02   8.0394976e+00  -1.0338308e+01   2.6161671e+00
   2.1901552e+01  -2.3278077e+01   2.0000000e+02   8.4430852e+00  -1.0343966e+01   3.2042680e+00
   2.1769220e+01  -2.3321100e+01   2.0000000e+02   8.8820523e+00  -1.0281565e+01   3.6957012e+00
   2.1640468e+01  -2.3372575e+01   2.0000000e+02   9.3454478e+00  -1.0151496e+01   4.0662239e+00
   2.1515932e+01  -2.3432246e+01   2.0000000e+02   9.8177189e+00  -9.9605098e+00   4.2915751e+00
   2.1396230e+01  -2.3499823e+01   2.0000000e+02   1.0279509e+01  -9.7217495e+00   4.3516410e+00
   2.1281956e+01  -2.3574971e+01   2.0000000e+02   1.0708934e+01  -9.4531413e+00   4.2343063e+00
   2.1173683e+01  -2.3657321e+01   2.0000000e+02   1.1083347e+01  -9.1747051e+00   3.9376270e+00
   2.1071957e+01  -2.3746467e+01   2.0000000e+02   1.1381223e+01  -8.9057072e+00   3.4704484e+00
   2.0977292e+01  -2.3841967e+01   2.0000000e+02   1.1584047e+01  -8.6622915e+00   2.8514621e+00
   2.0890172e+01  -2.3943350e+01   2.0000000e+02   1.1678001e+01  -8.4559065e+00   2.1070560e+00
   2.0811049e+01  -2.4050112e+01   2.0000000e+02   1.1655302e+01  -8.2925558e+00   1.2685610e+00
   2.0740335e+01  -2.4161722e+01   2.0000000e+02   1.1514954e+01  -8.1727825e+00   3.6895303e-01
   2.0678403e+01  -2.4277624e+01   2.0000000e+02   1.1262602e+01  -8.0923784e+00  -5.6053569e-01
   2.0625589e+01  -2.4397238e+01   2.0000000e+02   1.0909386e+01  -8.0437297e+00  -1.4933681e+00
   2.0582181e+01  -2.4519965e+01   2.0000000e+02   1.0469956e+01  -8.0176001e+00  -2.4096324e+00
   2.0548425e+01  -2.4645188e+01   2.0000000e+02   9.9601683e+00  -8.0049890e+00  -3.2966355e+00
   2.0524521e+01  -2.4772277e+01   2.0000000e+02   9.3951043e+00  -7.9985802e+00  -4.1482383e+00
   2.0510619e+01  -2.4900589e+01   2.0000000e+02   8.7878394e+00  -7.9933936e+00  -4.9634218e+00
   2.0506821e+01  -2.5029474e+01   2.0000000e+02   8.1489633e+00  -7.9864656e+00  -5.7448328e+00
   2.0513178e+01  -2.5158276e+01   2.0000000e+02   7.4865795e+00  -7.9756798e+00  -6.4975629e+00
   2.0529689e+01  -2.5286339e+01   2.0000000e+02   6.8063623e+00  -7.9581000e+00  -7.2282133e+00
   2.0556303e+01  -2.5413007e+01   2.0000000e+02   6.1115560e+00  -7.9282867e+00  -7.9438472e+00
   2.0592913e+01  -2.5537629e+01   2.0000000e+02   5.4029781e+00  -7.8771132e+00  -8.6505290e+00
   2.0639364e+01  -2.5659565e+01   2.0000000e+02   4.6793318e+00  -7.7914804e+00  -9.3514934e+00
   2.0695445e+01  -2.5778184e+01   2.0000000e+02   3.9381189e+00  -7.6552024e+00  -1.0045146e+01
   2.0760893e+01  -2.5892871e+01   2.0000000e+02   3.1770633e+00  -7.4509986e+00  -1.0723712e+01
   2.0835398e+01  -2.6003030e+01   2.0000000e+02   2.3958390e+00  -7.1632368e+00  -1.1373077e+01
   2.0918594e+01  -2.6108086e+01   2.0000000e+02   1.5976026e+00  -6.7808309e+00  -1.1974108e+01
   2.1010072e+01  -2.6207491e+01   2.0000000e+02   7.8971469e-01  -6.2994190e+00  -1.2505570e+01
   2.1109371e+01  -2.6300723e+01   2.0000000e+02  -1.6639917e-02  -5.7223039e+00  -1.2947715e+01
   2.1215991e+01  -2.6387291e+01   2.0000000e+02  -8.0808812e-01  -5.0597289e+00  -1.3285794e+01
   2.1329383e+01  -2.6466740e+01   2.0000000e+02  -1.5714183e+00  -4.3269075e+00  -1.3512239e+01
   2.1448965e+01  -2.6538649e+01   2.0000000e+02  -2.2959037e+00  -3.5412916e+00  -1.3627168e+01
   2.1574114e+01  -2.6602638e+01   2.0000000e+02  -2.9748507e+00  -2.7200879e+00  -1.3637127e+01
   2.1704176e+01  -2.6658366e+01   2.0000000e+02  -3.6058877e+00  -1.8784942e+00  -1.3552874e+01
   2.1838468e+01  -2.6705539e+01   2.0000000e+02  -4.1901077e+00  -1.0289907e+00  -1.3386953e+01
   2.1976280e+01  -2.6743904e+01   2.0000000e+02  -4.7303628e+00  -1.8158923e-01  -1.3151826e+01
   2.2116882e+01  -2.6773258e+01   2.0000000e+02  -5.2294717e+00   6.5540504e-01  -1.2858787e+01
   2.2259526e+01  -2.6793443e+01   2.0000000e+02  -5.6886538e+00   1.4744078e+00  -1.2517722e+01
   2.2403453e+01  -2.6804352e+01   2.0000000e+02  -6.1066585e+00   2.2678391e+00  -1.2137371e+01
   2.2547895e+01  -2.6805927e+01   2.0000000e+02  -6.4795872e+00   3.0278101e+00  -1.1725808e+01
   2.2692082e+01  -2.6798159e+01   2.0000000e+02  -6.8014654e+00   3.7463265e+00  -1.1290756e+01
   2.2835244e+01  -2.6781090e+01   2.0000000e+02  -7.0654056e+00   4.4157571e+00  -1.0839540e+01
   2.2976618e+01  -2.6754810e+01   2.0000000e+02  -7.2651330e+00   5.0292904e+00  -1.0378790e+01
   2.3115452e+01  -2.6719461e+01   2.0000000e+02  -7.3965835e+00   5.5811388e+00  -9.9141052e+00
   2.3251011e+01  -2.6675231e+01   2.0000000e+02  -7.4591735e+00   6.0664766e+00  -9.4501070e+00
   2.3382576e+01  -2.6622354e+01   2.0000000e+02  -7.4565002e+00   6.4813045e+00  -8.9909577e+00
   2.3509455e+01  -2.6561113e+01   2.0000000e+02  -7.3963509e+00   6.8225114e+00  -8.5411229e+00
   2.3630984e+01  -2.6491832e+01   2.0000000e+02  -7.2899545e+00   7.0880813e+00  -8.1063230e+00
   2.3746529e+01  -2.6414879e+01   2.0000000e+02  -7.1507431e+00   7.2774616e+00  -7.6942310e+00
   2.3855494e+01  -2.6330661e+01   2.0000000e+02  -6.9927673e+00   7.3919279e+00  -7.3148543e+00
   2.3957318e+01  -2.6239621e+01   2.0000000e+02  -6.8289873e+00   7.4347978e+00  -6.9806049e+00
   2.4051485e+01  -2.6142240e+01   2.0000000e+02  -6.6696330e+00   7.4114699e+00  -6.7058562e+00
   2.4137520e+01  -2.6039027e+01   2.0000000e+02  -6.5206623e+00   7.3291304e+00  -6.5062272e+00
   2.4214996e+01  -2.5930524e+01   2.0000000e+02  -6.3825483e+00   7.1961598e+00  -6.3972417e+00
   2.4283534e+01  -2.5817298e+01   2.0000000e+02  -6.2494571e+00   7.0211516e+00  -6.3926053e+00
   2.4342803e+01  -2.5699936e+01   2.0000000e+02  -6.1091285e+00   6.8116540e+00  -6.5020431e+00
   2.4392524e+01  -2.5579048e+01   2.0000000e+02  -5.9437653e+00   6.5728362e+00  -6.7288849e+00
   2.4432471e+01  -2.5455260e+01   2.0000000e+02  -5.7320754e+00   6.3063128e+00  -7.0679715e+00
   2.4462467e+01  -2.5329209e+01   2.0000000e+02  -5.4524037e+00   6.0094569e+00  -7.5044513e+00
   2.4482391e+01  -2.5201543e+01   2.0000000e+02  -5.0865012e+00   5.6754823e+00  -8.0139182e+00
   2.4492172e+01  -2.5072917e+01   2.0000000e+02  -4.6229984e+00   5.2943676e+00  -8.5643788e+00
   2.4491793e+01  -2.4943986e+01   2.0000000e+02  -4.0596587e+00   4.8545567e+00  -9.1196298e+00
   2.4481286e+01  -2.4815408e+01   2.0000000e+02  -3.4037615e+00   4.3451621e+00  -9.6433018e+00
   2.4460738e+01  -2.4687835e+01   2.0000000e+02  -2.6705818e+00   3.7582054e+00  -1.0102485e+01
   2.4430282e+01  -2.4561912e+01   2.0000000e+02  -1.8806347e+00   3.0904319e+00  -1.0470173e+01
   2.4390102e+01  -2.4438274e+01   2.0000000e+02  -1.0567471e+00   2.3443712e+00  -1.0726168e+01
   2.4340427e+01  -2.4317543e+01   2.0000000e+02  -2.2168791e-01   1.5284048e+00  -1.0856948e+01
   2.4281532e+01  -2.4200325e+01   2.0000000e+02   6.0328555e-01   6.5593312e-01  -1.0855049e+01
   2.4213738e+01  -2.4087206e+01   2.0000000e+02   1.3992176e+00  -2.5615650e-01  -1.0718470e+01
   2.4137403e+01  -2.3978750e+01   2.0000000e+02   2.1500200e+00  -1.1893959e+00  -1.0450189e+01
   2.4052930e+01  -2.3875497e+01   2.0000000e+02   2.8429605e+00  -2.1255068e+00  -1.0057537e+01
   2.3960755e+01  -2.3777959e+01   2.0000000e+02   3.4692263e+00  -3.0478676e+00  -9.5512617e+00
   2.3861352e+01  -2.3686621e+01   2.0000000e+02   4.0241656e+00  -3.9422498e+00  -8.9443029e+00
   2.3755225e+01  -2.3601934e+01   2.0000000e+02   4.5072185e+00  -4.7970136e+00  -8.2505169e+00
   2.3642911e+01  -2.3524316e+01   2.0000000e+02   4.9214173e+00  -5.6027499e+00  -7.4838071e+00
   2.3524973e+01  -2.3454149e+01   2.0000000e+02   5.2727474e+00  -6.3518371e+00  -6.6577885e+00
   2.3401998e+01  -2.3391780e+01   2.0000000e+02   5.5695029e+00  -7.0381205e+00  -5.7859858e+00
   2.3274596e+01  -2.3337513e+01   2.0000000e+02   5.8217637e+00  -7.6569714e+00  -4.8821860e+00
   2.3143399e+01  -2.3291616e+01   2.0000000e+02   6.0409980e+00  -8.2056392e+00  -3.9606841e+00
   2.3009050e+01  -2.3254314e+01   2.0000000e+02   6.2396787e+00  -8.6837742e+00  -3.0359016e+00
   2.2872211e+01  -2.3225789e+01   2.0000000e+02   6.4307624e+00  -9.0935897e+00  -2.1216156e+00
   2.2733552e+01  -2.3206182e+01   2.0000000e+02   6.6270898e+00  -9.4394572e+00  -1.2298578e+00
   2.2593752e+01  -2.3195587e+01   2.0000000e+02   6.8406481e+00  -9.7267150e+00  -3.7010203e-01
   2.2453493e+01  -2.3194058e+01   2.0000000e+02   7.0818876e+00  -9.9599126e+00   4.5068404e-01
   2.1717233e+01  -2.3201844e+01   2.0000000e+02   8.4099991e+00  -1.0500612e+01   4.9176340e+00
   2.1589456e+01  -2.3252610e+01   2.0000000e+02   8.8878773e+00  -1.0351327e+01   5.3530686e+00
   2.1465502e+01  -2.3310923e+01   2.0000000e+02   9.3848437e+00  -1.0139432e+01   5.6514351e+00
   2.1345895e+01  -2.3376537e+01   2.0000000e+02   9.8837130e+00  -9.8781589e+00   5.7904784e+00
   2.1231146e+01  -2.3449175e+01   2.0000000e+02   1.0364489e+01  -9.5855717e+00   5.7551648e+00
   2.1121746e+01  -2.3528533e+01   2.0000000e+02   1.0805746e+01  -9.2819734e+00   5.5399097e+00
   2.1018166e+01  -2.3614274e+01   2.0000000e+02   1.1186162e+01  -8.9872010e+00   5.1493208e+00
   2.0920855e+01  -2.3706036e+01   2.0000000e+02   1.1486150e+01  -8.7183601e+00   4.5974982e+00
   2.0830238e+01  -2.3803431e+01   2.0000000e+02   1.1689389e+01  -8.4883016e+00   3.9064959e+00
   2.0746715e+01  -2.3906044e+01   2.0000000e+02   1.1784211e+01  -8.3048063e+00   3.1041782e+00
   2.0670657e+01  -2.4013440e+01   2.0000000e+02   1.1764685e+01  -8.1703596e+00   2.2215592e+00
   2.0602407e+01  -2.4125160e+01   2.0000000e+02   1.1631114e+01  -8.0824844e+00   1.2899585e+00
   2.0542276e+01  -2.4240728e+01   2.0000000e+02   1.1389700e+01  -8.0346059e+00   3.3807053e-01
   2.0490546e+01  -2.4359647e+01   2.0000000e+02   1.1051314e+01  -8.0174372e+00  -6.1036716e-01
   2.0447460e+01  -2.4481407e+01   2.0000000e+02   1.0629542e+01  -8.0206922e+00  -1.5379588e+00
   2.0413229e+01  -2.4605485e+01   2.0000000e+02   1.0138614e+01  -8.0348195e+00  -2.4337408e+00
   2.0388028e+01  -2.4731343e+01   2.0000000e+02   9.5917773e+00  -8.0523453e+00  -3.2921444e+00
   2.0371993e+01  -2.4858436e+01   2.0000000e+02   9.0004473e+00  -8.0685276e+00  -4.1115464e+00
   2.0365222e+01  -2.4986213e+01   2.0000000e+02   8.3741579e+00  -8.0811832e+00  -4.8929352e+00
   2.0367773e+01  -2.5114117e+01   2.0000000e+02   7.7209142e+00  -8.0897697e+00  -5.6391244e+00
   2.0379663e+01  -2.5241588e+01   2.0000000e+02   7.0474685e+00  -8.0939577e+00  -6.3545080e+00
   2.0400871e+01  -2.5368068e+01   2.0000000e+02   6.3592472e+00  -8.0920131e+00  -7.0449484e+00
   2.0431332e+01  -2.5492999e+01   2.0000000e+02   5.6600180e+00  -8.0793523e+00  -7.7172121e+00
   2.0470940e+01  -2.5615832e+01   2.0000000e+02   4.9514959e+00  -8.0476021e+00  -8.3778356e+00
   2.0519549e+01  -2.5736021e+01   2.0000000e+02   4.2333862e+00  -7.9844580e+00  -9.0313272e+00
   2.0576970e+01  -2.5853033e+01   2.0000000e+02   3.5039273e+00  -7.8745272e+00  -9.6782332e+00
   2.0642973e+01  -2.5966347e+01   2.0000000e+02   2.7611007e+00  -7.7011124e+00  -1.0313602e+01
   2.0717289e+01  -2.6075456e+01   2.0000000e+02   2.0041869e+00  -7.4486662e+00  -1.0926478e+01
   2.0799606e+01  -2.6179872e+01   2.0000000e+02   1.2352357e+00  -7.1054056e+00  -1.1500766e+01
   2.0889578e+01  -2.6279124e+01   2.0000000e+02   4.5998930e-01  -6.6654006e+00  -1.2017510e+01
   2.0986819e+01  -2.6372765e+01   2.0000000e+02  -3.1224178e-01  -6.1296266e+00  -1.2457992e+01
   2.1090905e+01  -2.6460372e+01   2.0000000e+02  -1.0697630e+00  -5.5056545e+00  -1.2806888e+01
   2.1201383e+01  -2.6541549e+01   2.0000000e+02  -1.8005245e+00  -4.8060902e+00  -1.3054579e+01
   2.1317763e+01  -2.6615925e+01   2.0000000e+02  -2.4942736e+00  -4.0464069e+00  -1.3197945e+01
   2.1439528e+01  -2.6683162e+01   2.0000000e+02  -3.1442880e+00  -3.2426609e+00  -1.3239746e+01
   2.1566131e+01  -2.6742955e+01   2.0000000e+02  -3.7480297e+00  -2.4098365e+00  -1.3186959e+01
   2.1697003e+01  -2.6795028e+01   2.0000000e+02  -4.3067117e+00  -1.5609663e+00  -1.3048877e+01
   2.1831550e+01  -2.6839145e+01   2.0000000e+02  -4.8240913e+00  -7.0705119e-01  -1.2835460e+01
   2.1969161e+01  -2.6875102e+01   2.0000000e+02  -5.3048099e+00   1.4249708e-01  -1.2556393e+01
   2.2109206e+01  -2.6902734e+01   2.0000000e+02  -5.7528481e+00   9.7916246e-01  -1.2220741e+01
   2.2251046e+01  -2.6921915e+01   2.0000000e+02  -6.1703304e+00   1.7947253e+00  -1.1837121e+01
   2.2394029e+01  -2.6932557e+01   2.0000000e+02  -6.5568015e+00   2.5808602e+00  -1.1414130e+01
   2.2537499e+01  -2.6934610e+01   2.0000000e+02  -6.9090853e+00   3.3292219e+00  -1.0960722e+01
   2.2680797e+01  -2.6928065e+01   2.0000000e+02  -7.2216704e+00   4.0318918e+00  -1.0486260e+01
   2.2823264e+01  -2.6912952e+01   2.0000000e+02  -7.4875724e+00   4.6820039e+00  -1.0000164e+01
   2.2964246e+01  -2.6889341e+01   2.0000000e+02  -7.6995883e+00   5.2742466e+00  -9.5111600e+00
   2.3103099e+01  -2.6857339e+01   2.0000000e+02  -7.8517138e+00   5.8049633e+00  -9.0265138e+00
   2.3239186e+01  -2.6817095e+01   2.0000000e+02  -7.9404778e+00   6.2718318e+00  -8.5515867e+00
   2.3371887e+01  -2.6768793e+01   2.0000000e+02  -7.9658982e+00   6.6733893e+00  -8.0899847e+00
   2.3500601e+01  -2.6712653e+01   2.0000000e+02  -7.9318861e+00   7.0086354e+00  -7.6442113e+00
   2.3624745e+01  -2.6648934e+01   2.0000000e+02  -7.8460468e+00   7.2769000e+00  -7.2166177e+00
   2.3743763e+01  -2.6577925e+01   2.0000000e+02  -7.7189217e+00   7.4780047e+00  -6.8103706e+00
   2.3857121e+01  -2.6499951e+01   2.0000000e+02  -7.5628901e+00   7.6125774e+00  -6.4302156e+00
   2.3964317e+01  -2.6415367e+01   2.0000000e+02  -7.3908475e+00   7.6824404e+00  -6.0829232e+00
   2.4064881e+01  -2.6324555e+01   2.0000000e+02  -7.2148366e+00   7.6909224e+00  -5.7774474e+00
   2.4158373e+01  -2.6227927e+01   2.0000000e+02  -7.0447593e+00   7.6430380e+00  -5.5247306e+00
   2.4244391e+01  -2.6125919e+01   2.0000000e+02  -6.8871998e+00   7.5454349e+00  -5.3371352e+00
   2.4322568e+01  -2.6018991e+01   2.0000000e+02  -6.7444397e+00   7.4060227e+00  -5.2275839e+00
   2.4392575e+01  -2.5907622e+01   2.0000000e+02  -6.6137172e+00   7.2332558e+00  -5.2083397e+00
   2.4454124e+01  -2.5792311e+01   2.0000000e+02  -6.4868911e+00   7.0351190e+00  -5.2894346e+00
   2.4506966e+01  -2.5673573e+01   2.0000000e+02  -6.3506827e+00   6.8179276e+00  -5.4769071e+00
   2.4550892e+01  -2.5551935e+01   2.0000000e+02  -6.1877426e+00   6.5851446e+00  -5.7709765e+00
   2.4585736e+01  -2.5427937e+01   2.0000000e+02  -5.9786536e+00   6.3364675e+00  -6.1645150e+00
   2.4611372e+01  -2.5302127e+01   2.0000000e+02  -5.7046859e+00   6.0674037e+00  -6.6424011e+00
   2.4627716e+01  -2.5175060e+01   2.0000000e+02  -5.3508588e+00   5.7695350e+00  -7.1820404e+00
   2.4634725e+01  -2.5047293e+01   2.0000000e+02  -4.9085422e+00   5.4315114e+00  -7.7552649e+00
   2.4632399e+01  -2.4919386e+01   2.0000000e+02  -4.3769059e+00   5.0407008e+00  -8.3311821e+00
   2.4620777e+01  -2.4791896e+01   2.0000000e+02  -3.7627576e+00   4.5851927e+00  -8.8793677e+00
   2.4599937e+01  -2.4665380e+01   2.0000000e+02  -3.0790174e+00   4.0558405e+00  -9.3724301e+00
   2.4569998e+01  -2.4540385e+01   2.0000000e+02  -2.3424020e+00   3.4478926e+00  -9.7875085e+00
   2.4531116e+01  -2.4417453e+01   2.0000000e+02  -1.5712472e+00   2.7619915e+00  -1.0106641e+01
   2.4483484e+01  -2.4297112e+01   2.0000000e+02  -7.8394003e-01   2.0043070e+00  -1.0316476e+01
   2.4427330e+01  -2.4179882e+01   2.0000000e+02   1.8240675e-03   1.1859344e+00  -1.0407892e+01
   2.4362920e+01  -2.4066264e+01   2.0000000e+02   7.6940404e-01   3.2160194e-01  -1.0375872e+01
   2.4290548e+01  -2.3956746e+01   2.0000000e+02   1.5035534e+00  -5.7195789e-01  -1.0219650e+01
   2.4210544e+01  -2.3851793e+01   2.0000000e+02   2.1909837e+00  -1.4776983e+00  -9.9426830e+00
   2.4123266e+01  -2.3751854e+01   2.0000000e+02   2.8211133e+00  -2.3796775e+00  -9.5522634e+00
   2.4029099e+01  -2.3657353e+01   2.0000000e+02   3.3867353e+00  -3.2640503e+00  -9.0585367e+00
   2.3928457e+01  -2.3568691e+01   2.0000000e+02   3.8842786e+00  -4.1194108e+00  -8.4732544e+00
   2.3821778e+01  -2.3486242e+01   2.0000000e+02   4.3136726e+00  -4.9366785e+00  -7.8085765e+00
   2.3709522e+01  -2.3410356e+01   2.0000000e+02   4.6778711e+00  -5.7086188e+00  -7.0763265e+00
   2.3592172e+01  -2.3341352e+01   2.0000000e+02   4.9822712e+00  -6.4293304e+00  -6.2877768e+00
   2.3470229e+01  -2.3279522e+01   2.0000000e+02   5.2342336e+00  -7.0939079e+00  -5.4539391e+00
   2.3344211e+01  -2.3225124e+01   2.0000000e+02   5.4427326e+00  -7.6984591e+00  -4.5859848e+00
   2.3214650e+01  -2.3178389e+01   2.0000000e+02   5.6181215e+00  -8.2404174e+00  -3.6955674e+00
   2.3082095e+01  -2.3139511e+01   2.0000000e+02   5.7718325e+00  -8.7190324e+00  -2.7946579e+00
   2.2947102e+01  -2.3108655e+01   2.0000000e+02   5.9160149e+00  -9.1357171e+00  -1.8949151e+00
   2.2810237e+01  -2.3085949e+01   2.0000000e+02   6.0629603e+00  -9.4939318e+00  -1.0067114e+00
   2.2672075e+01  -2.3071488e+01   2.0000000e+02   6.2244816e+00  -9.7984015e+00  -1.3826235e-01
   2.2533193e+01  -2.3065334e+01   2.0000000e+02   6.4113055e+00  -1.0053734e+01   7.0476252e-01
   2.2394173e+01  -2.3067512e+01   2.0000000e+02   6.6325254e+00  -1.0262737e+01   1.5186532e+00
   2.2255595e+01  -2.3078012e+01   2.0000000e+02   6.8952062e+00  -1.0425051e+01   2.3000468e+00
   2.2118039e+01  -2.3096791e+01   2.0000000e+02   7.2040387e+00  -1.0536687e+01   3.0435136e+00
   2.1982081e+01  -2.3123771e+01   2.0000000e+02   7.5609500e+00  -1.0590931e+01   3.7391648e+00
   2.1848292e+01  -2.3158837e+01   2.0000000e+02   7.9646189e+00  -1.0580535e+01   4.3711275e+00
   2.1145197e+01  -2.3348129e+01   2.0000000e+02   1.0037703e+01  -9.5660671e+00   7.2009777e+00
   2.1034417e+01  -2.3428449e+01   2.0000000e+02   1.0530449e+01  -9.2293094e+00   7.0105123e+00
   2.0929208e+01  -2.3514920e+01   2.0000000e+02   1.0969369e+01  -8.9076415e+00   6.6377221e+00
   2.0829984e+01  -2.3607211e+01   2.0000000e+02   1.1334047e+01  -8.6187168e+00   6.0962558e+00
   2.0737135e+01  -2.3704970e+01   2.0000000e+02   1.1606783e+01  -8.3756072e+00   5.4076388e+00
   2.0651028e+01  -2.3807824e+01   2.0000000e+02   1.1773997e+01  -8.1861426e+00   4.5992825e+00
   2.0572011e+01  -2.3915378e+01   2.0000000e+02   1.1827452e+01  -8.0527602e+00   3.7021276e+00
   2.0500403e+01  -2.4027220e+01   2.0000000e+02   1.1765022e+01  -7.9727664e+00   2.7479389e+00
   2.0436500e+01  -2.4142920e+01   2.0000000e+02   1.1590682e+01  -7.9391035e+00   1.7664654e+00
   2.0380567e+01  -2.4262030e+01   2.0000000e+02   1.1313543e+01  -7.9415953e+00   7.8296329e-01
   2.0332845e+01  -2.4384091e+01   2.0000000e+02   1.0946029e+01  -7.9686155e+00  -1.8352031e-01
   2.0293540e+01  -2.4508629e+01   2.0000000e+02   1.0501703e+01  -8.0088700e+00  -1.1203733e+00
   2.0262832e+01  -2.4635160e+01   2.0000000e+02   9.9933773e+00  -8.0529640e+00  -2.0205510e+00
   2.0240865e+01  -2.4763189e+01   2.0000000e+02   9.4320752e+00  -8.0943971e+00  -2.8808217e+00
   2.0227752e+01  -2.4892218e+01   2.0000000e+02   8.8269431e+00  -8.1298241e+00  -3.7001706e+00
   2.0223573e+01  -2.5021738e+01   2.0000000e+02   8.1859110e+00  -8.1585731e+00  -4.4787293e+00
   2.0228372e+01  -2.5151242e+01   2.0000000e+02   7.5163712e+00  -8.1815857e+00  -5.2177316e+00
   2.0242159e+01  -2.5280216e+01   2.0000000e+02   6.8255658e+00  -8.1999871e+00  -5.9199425e+00
   2.0264908e+01  -2.5408150e+01   2.0000000e+02   6.1202735e+00  -8.2135406e+00  -6.5901959e+00
   2.0296556e+01  -2.5534537e+01   2.0000000e+02   5.4061086e+00  -8.2192309e+00  -7.2352899e+00
   2.0337006e+01  -2.5658872e+01   2.0000000e+02   4.6867626e+00  -8.2102415e+00  -7.8630325e+00
   2.0386124e+01  -2.5780658e+01   2.0000000e+02   3.9635622e+00  -8.1756095e+00  -8.4804725e+00
   2.0443739e+01  -2.5899405e+01   2.0000000e+02   3.2357163e+00  -8.1007632e+00  -9.0917017e+00
   2.0509646e+01  -2.6014637e+01   2.0000000e+02   2.5012397e+00  -7.9690055e+00  -9.6958877e+00
   2.0583602e+01  -2.6125888e+01   2.0000000e+02   1.7584998e+00  -7.7637782e+00  -1.0286082e+01
   2.0665331e+01  -2.6232708e+01   2.0000000e+02   1.0078627e+00  -7.4712537e+00  -1.0849440e+01
   2.0754524e+01  -2.6334661e+01   2.0000000e+02   2.5301231e-01  -7.0826644e+00  -1.1368877e+01
   2.0850836e+01  -2.6431334e+01   2.0000000e+02  -4.9867939e-01  -6.5957564e+00  -1.1825864e+01
   2.0953892e+01  -2.6522331e+01   2.0000000e+02  -1.2368387e+00  -6.0149620e+00  -1.2203635e+01
   2.1063287e+01  -2.6607279e+01   2.0000000e+02  -1.9498571e+00  -5.3503098e+00  -1.2489820e+01
   2.1178586e+01  -2.6685829e+01   2.0000000e+02  -2.6270977e+00  -4.6154862e+00  -1.2677797e+01
   2.1299326e+01  -2.6757658e+01   2.0000000e+02  -3.2608755e+00  -3.8256747e+00  -1.2766582e+01
   2.1425020e+01  -2.6822469e+01   2.0000000e+02  -3.8476033e+00  -2.9957808e+00  -1.2759590e+01
   2.1555157e+01  -2.6879996e+01   2.0000000e+02  -4.3878788e+00  -2.1394034e+00  -1.2662915e+01
   2.1689206e+01  -2.6929998e+01   2.0000000e+02  -4.8855804e+00  -1.2685578e+00  -1.2483852e+01
   2.1826617e+01  -2.6972270e+01   2.0000000e+02  -5.3464782e+00  -3.9391194e-01  -1.2229916e+01
   2.1966823e+01  -2.7006635e+01   2.0000000e+02  -5.7766317e+00   4.7468130e-01  -1.1908569e+01
   2.2109244e+01  -2.7032950e+01   2.0000000e+02  -6.1810482e+00   1.3276714e+00  -1.1527367e+01
   2.2253289e+01  -2.7051107e+01   2.0000000e+02  -6.5626679e+00   2.1554347e+00  -1.1094400e+01
   2.2398361e+01  -2.7061029e+01   2.0000000e+02  -6.9217480e+00   2.9482170e+00  -1.0618791e+01
   2.2543856e+01  -2.7062675e+01   2.0000000e+02  -7.2556712e+00   3.6964856e+00  -1.0110992e+01
   2.2689169e+01  -2.7056037e+01   2.0000000e+02  -7.5591812e+00   4.3916728e+00  -9.5826726e+00
   2.2833694e+01  -2.7041145e+01   2.0000000e+02  -7.8250723e+00   5.0270306e+00  -9.0460101e+00
   2.2976832e+01  -2.7018060e+01   2.0000000e+02  -8.0452885e+00   5.5982350e+00  -8.5125681e+00
   2.3117987e+01  -2.6986877e+01   2.0000000e+02  -8.2122944e+00   6.1034029e+00  -7.9920651e+00
   2.3256577e+01  -2.6947727e+01   2.0000000e+02  -8.3205036e+00   6.5425889e+00  -7.4914573e+00
   2.3392029e+01  -2.6900773e+01   2.0000000e+02  -8.3674115e+00   6.9168920e+00  -7.0148521e+00
   2.3523785e+01  -2.6846208e+01   2.0000000e+02  -8.3542597e+00   7.2276801e+00  -6.5640641e+00
   2.3651306e+01  -2.6784261e+01   2.0000000e+02  -8.2861259e+00   7.4761423e+00  -6.1395786e+00
   2.3774074e+01  -2.6715185e+01   2.0000000e+02  -8.1714170e+00   7.6632078e+00  -5.7417900e+00
   2.3891591e+01  -2.6639268e+01   2.0000000e+02  -8.0210105e+00   7.7897974e+00  -5.3719758e+00
   2.4003384e+01  -2.6556821e+01   2.0000000e+02  -7.8470917e+00   7.8572475e+00  -5.0331228e+00
   2.4109009e+01  -2.6468184e+01   2.0000000e+02  -7.6619472e+00   7.8678050e+00  -4.7303023e+00
   2.4208047e+01  -2.6373721e+01   2.0000000e+02  -7.4767519e+00   7.8250608e+00  -4.4708134e+00
   2.4300111e+01  -2.6273816e+01   2.0000000e+02  -7.3004806e+00   7.7342329e+00  -4.2638767e+00
   2.4384844e+01  -2.6168879e+01   2.0000000e+02  -7.1389961e+00   7.6021757e+00  -4.1200410e+00
   2.4461924e+01  -2.6059335e+01   2.0000000e+02  -6.9942686e+00   7.4370231e+00  -4.0503752e+00
   2.4531059e+01  -2.5945630e+01   2.0000000e+02  -6.8638193e+00   7.2474894e+00  -4.0654422e+00
   2.4591995e+01  -2.5828222e+01   2.0000000e+02  -6.7404183e+00   7.0418495e+00  -4.1740292e+00
   2.4644510e+01  -2.5707585e+01   2.0000000e+02  -6.6122426e+00   6.8267655e+00  -4.3817110e+00
   2.4688422e+01  -2.5584204e+01   2.0000000e+02  -6.4636938e+00   6.6060930e+00  -4.6892634e+00
   2.4723581e+01  -2.5458573e+01   2.0000000e+02  -6.2770049e+00   6.3799139e+00  -5.0913629e+00
   2.4749874e+01  -2.5331192e+01   2.0000000e+02  -6.0345890e+00   6.1439935e+00  -5.5758111e+00
   2.4767226e+01  -2.5202570e+01   2.0000000e+02  -5.7217537e+00   5.8898779e+00  -6.1237629e+00
   2.4775596e+01  -2.5073216e+01   2.0000000e+02  -5.3290921e+00   5.6056903e+00  -6.7112290e+00
   2.4774981e+01  -2.4943641e+01   2.0000000e+02  -4.8539298e+00   5.2776130e+00  -7.3114074e+00
   2.4765409e+01  -2.4814356e+01   2.0000000e+02  -4.3003388e+00   4.8918209e+00  -7.8974123e+00
   2.4746948e+01  -2.4685869e+01   2.0000000e+02  -3.6778769e+00   4.4365482e+00  -8.4444327e+00
   2.4719697e+01  -2.4558683e+01   2.0000000e+02  -2.9995835e+00   3.9038982e+00  -8.9309996e+00
   2.4683788e+01  -2.4433295e+01   2.0000000e+02  -2.2801031e+00   3.2910962e+00  -9.3391552e+00
   2.4639386e+01  -2.4310193e+01   2.0000000e+02  -1.5344838e+00   2.6009844e+00  -9.6540736e+00
   2.4586688e+01  -2.4189855e+01   2.0000000e+02  -7.7777406e-01   1.8417375e+00  -9.8637416e+00
   2.4525921e+01  -2.4072746e+01   2.0000000e+02  -2.5042901e-02   1.0258847e+00  -9.9591222e+00
   2.4457340e+01  -2.3959319e+01   2.0000000e+02   7.0867314e-01   1.6887070e-01  -9.9347726e+00
   2.4381229e+01  -2.3850011e+01   2.0000000e+02   1.4088775e+00  -7.1260856e-01  -9.7895081e+00
   2.4297899e+01  -2.3745241e+01   2.0000000e+02   2.0625617e+00  -1.6021944e+00  -9.5266324e+00
   2.4207686e+01  -2.3645412e+01   2.0000000e+02   2.6592626e+00  -2.4851007e+00  -9.1534447e+00
   2.4110948e+01  -2.3550906e+01   2.0000000e+02   3.1918616e+00  -3.3488820e+00  -8.6800650e+00
   2.4008069e+01  -2.3462082e+01   2.0000000e+02   3.6568197e+00  -4.1836012e+00  -8.1179838e+00
   2.3899452e+01  -2.3379281e+01   2.0000000e+02   4.0539525e+00  -4.9815600e+00  -7.4788130e+00
   2.3785519e+01  -2.3302816e+01   2.0000000e+02   4.3858949e+00  -5.7367905e+00  -6.7734755e+00
   2.3666711e+01  -2.3232978e+01   2.0000000e+02   4.6575311e+00  -6.4444504e+00  -6.0120825e+00
   2.3543485e+01  -2.3170032e+01   2.0000000e+02   4.8755929e+00  -7.1004550e+00  -5.2042361e+00
   2.3416313e+01  -2.3114217e+01   2.0000000e+02   5.0484354e+00  -7.7014049e+00  -4.3595468e+00
   2.3285681e+01  -2.3065743e+01   2.0000000e+02   5.1858951e+00  -8.2448496e+00  -3.4880080e+00
   2.3152084e+01  -2.3024795e+01   2.0000000e+02   5.2991100e+00  -8.7297527e+00  -2.6000010e+00
   2.3016028e+01  -2.2991526e+01   2.0000000e+02   5.4001275e+00  -9.1569177e+00  -1.7057984e+00
   2.2878028e+01  -2.2966062e+01   2.0000000e+02   5.5013689e+00  -9.5290752e+00  -8.1472650e-01
   2.2738605e+01  -2.2948500e+01   2.0000000e+02   5.6149702e+00  -9.8504102e+00   6.5802394e-02
   2.2598284e+01  -2.2938904e+01   2.0000000e+02   5.7521320e+00  -1.0125435e+01   9.3091895e-01
   2.2457593e+01  -2.2937313e+01   2.0000000e+02   5.9226561e+00  -1.0357382e+01   1.7780874e+00
   2.2317061e+01  -2.2943731e+01   2.0000000e+02   6.1345835e+00  -1.0546633e+01   2.6059409e+00
   2.2177218e+01  -2.2958135e+01   2.0000000e+02   6.3940421e+00  -1.0689738e+01   3.4120608e+00
   2.2038590e+01  -2.2980470e+01   2.0000000e+02   6.7050464e+00  -1.0779645e+01   4.1903785e+00
   2.1901700e+01  -2.3010651e+01   2.0000000e+02   7.0692019e+00  -1.0807304e+01   4.9288625e+00
   2.1767065e+01  -2.3048566e+01   2.0000000e+02   7.4852402e+00  -1.0764400e+01   5.6084675e+00
   2.1635195e+01  -2.3094070e+01   2.0000000e+02   7.9483897e+00  -1.0646466e+01   6.2039739e+00
   2.1506590e+01  -2.3146993e+01   2.0000000e+02   8.4499211e+00  -1.0455347e+01   6.6866385e+00
   2.1381739e+01  -2.3207133e+01   2.0000000e+02   8.9769369e+00  -1.0200255e+01   7.0281812e+00
   2.1261121e+01  -2.3274263e+01   2.0000000e+02   9.5127440e+00  -9.8970473e+00   7.2048827e+00
   2.0628649e+01  -2.3624577e+01   2.0000000e+02   1.1447912e+01  -8.1493187e+00   6.7653193e+00
   2.0542963e+01  -2.3726459e+01   2.0000000e+02   1.1666264e+01  -7.9675446e+00   5.9592987e+00
   2.0463818e+01  -2.3832726e+01   2.0000000e+02   1.1776533e+01  -7.8463031e+00   5.0648584e+00
   2.0391495e+01  -2.3943022e+01   2.0000000e+02   1.1775253e+01  -7.7822933e+00   4.1119193e+00
   2.0326254e+01  -2.4056978e+01   2.0000000e+02   1.1664673e+01  -7.7681255e+00   3.1287521e+00
   2.0268331e+01  -2.4174209e+01   2.0000000e+02   1.1452056e+01  -7.7933802e+00   2.1396975e+00
   2.0217943e+01  -2.4294321e+01   2.0000000e+02   1.1148117e+01  -7.8460544e+00   1.1634447e+00
   2.0175281e+01  -2.4416908e+01   2.0000000e+02   1.0764985e+01  -7.9141579e+00   2.1262006e-01
   2.0140511e+01  -2.4541555e+01   2.0000000e+02   1.0314267e+01  -7.9872000e+00  -7.0546633e-01
   2.0113776e+01  -2.4667837e+01   2.0000000e+02   9.8058285e+00  -8.0572617e+00  -1.5871425e+00
   2.0095189e+01  -2.4795325e+01   2.0000000e+02   9.2475344e+00  -8.1194921e+00  -2.4305054e+00
   2.0084841e+01  -2.4923582e+01   2.0000000e+02   8.6459263e+00  -8.1720033e+00  -3.2340622e+00
   2.0082791e+01  -2.5052169e+01   2.0000000e+02   8.0072385e+00  -8.2152673e+00  -3.9963261e+00
   2.0089074e+01  -2.5180644e+01   2.0000000e+02   7.3382656e+00  -8.2511594e+00  -4.7163778e+00
   2.0103693e+01  -2.5308563e+01   2.0000000e+02   6.6466098e+00  -8.2817912e+00  -5.3948687e+00
   2.0126625e+01  -2.5435483e+01   2.0000000e+02   5.9402218e+00  -8.3082501e+00  -6.0349902e+00
   2.0157816e+01  -2.5560964e+01   2.0000000e+02   5.2264549e+00  -8.3293766e+00  -6.6427430e+00
   2.0197183e+01  -2.5684569e+01   2.0000000e+02   4.5110240e+00  -8.3407498e+00  -7.2263224e+00
   2.0244615e+01  -2.5805866e+01   2.0000000e+02   3.7972351e+00  -8.3341077e+00  -7.7946251e+00
   2.0299970e+01  -2.5924428e+01   2.0000000e+02   3.0858007e+00  -8.2974408e+00  -8.3551407e+00
   2.0363078e+01  -2.6039840e+01   2.0000000e+02   2.3753314e+00  -8.2158984e+00  -8.9117857e+00
   2.0433738e+01  -2.6151694e+01   2.0000000e+02   1.6635686e+00  -8.0734867e+00  -9.4631619e+00
   2.0511723e+01  -2.6259594e+01   2.0000000e+02   9.4896428e-01  -7.8552862e+00  -1.0001909e+01
   2.0596777e+01  -2.6363157e+01   2.0000000e+02   2.3225288e-01  -7.5497433e+00  -1.0515351e+01
   2.0688616e+01  -2.6462014e+01   2.0000000e+02  -4.8252395e-01  -7.1504723e+00  -1.0987444e+01
   2.0786929e+01  -2.6555812e+01   2.0000000e+02  -1.1879508e+00  -6.6571039e+00  -1.1401531e+01
   2.0891382e+01  -2.6644216e+01   2.0000000e+02  -1.8742343e+00  -6.0749681e+00  -1.1743099e+01
   2.1001613e+01  -2.6726907e+01   2.0000000e+02  -2.5309527e+00  -5.4138320e+00  -1.2001734e+01
   2.1117239e+01  -2.6803589e+01   2.0000000e+02  -3.1491128e+00  -4.6860536e+00  -1.2171861e+01
   2.1237854e+01  -2.6873984e+01   2.0000000e+02  -3.7227522e+00  -3.9048492e+00  -1.2252249e+01
   2.1363032e+01  -2.6937839e+01   2.0000000e+02  -4.2498073e+00  -3.0830250e+00  -1.2244750e+01
   2.1492327e+01  -2.6994921e+01   2.0000000e+02  -4.7319908e+00  -2.2324268e+00  -1.2152919e+01
   2.1625278e+01  -2.7045024e+01   2.0000000e+02  -5.1739916e+00  -1.3639098e+00  -1.1980969e+01
   2.1761406e+01  -2.7087966e+01   2.0000000e+02  -5.5822143e+00  -4.8769582e-01  -1.1733330e+01
   2.1900221e+01  -2.7123590e+01   2.0000000e+02  -5.9635003e+00   3.8624835e-01  -1.1414706e+01
   2.2041219e+01  -2.7151766e+01   2.0000000e+02  -6.3239936e+00   1.2478370e+00  -1.1030447e+01
   2.2183888e+01  -2.7172392e+01   2.0000000e+02  -6.6682669e+00   2.0866815e+00  -1.0587047e+01
   2.2327710e+01  -2.7185392e+01   2.0000000e+02  -6.9986784e+00   2.8921055e+00  -1.0092660e+01
   2.2472160e+01  -2.7190719e+01   2.0000000e+02  -7.3149683e+00   3.6534960e+00  -9.5574680e+00
   2.2616712e+01  -2.7188354e+01   2.0000000e+02  -7.6141320e+00   4.3610663e+00  -8.9937070e+00
   2.2760838e+01  -2.7178304e+01   2.0000000e+02  -7.8906242e+00   5.0068305e+00  -8.4152006e+00
   2.2904013e+01  -2.7160607e+01   2.0000000e+02  -8.1369921e+00   5.5855402e+00  -7.8362150e+00
   2.3045716e+01  -2.7135328e+01   2.0000000e+02  -8.3448858e+00   6.0951039e+00  -7.2699931e+00
   2.3185431e+01  -2.7102558e+01   2.0000000e+02  -8.5063387e+00   6.5363195e+00  -6.7273194e+00
   2.3322653e+01  -2.7062417e+01   2.0000000e+02  -8.6150908e+00   6.9120234e+00  -6.2155473e+00
   2.3456885e+01  -2.7015051e+01   2.0000000e+02  -8.6676533e+00   7.2259348e+00  -5.7385088e+00
   2.3587643e+01  -2.6960633e+01   2.0000000e+02  -8.6639501e+00   7.4816738e+00  -5.2970864e+00
   2.3714460e+01  -2.6899360e+01   2.0000000e+02  -8.6074258e+00   7.6821556e+00  -4.8902808e+00
   2.3836884e+01  -2.6831455e+01   2.0000000e+02  -8.5046856e+00   7.8294181e+00  -4.5164240e+00
   2.3954480e+01  -2.6757162e+01   2.0000000e+02  -8.3647740e+00   7.9248178e+00  -4.1743217e+00
   2.4066835e+01  -2.6676751e+01   2.0000000e+02  -8.1982630e+00   7.9694708e+00  -3.8640678e+00
   2.4173557e+01  -2.6590510e+01   2.0000000e+02  -8.0162195e+00   7.9648052e+00  -3.5876720e+00
   2.4274276e+01  -2.6498750e+01   2.0000000e+02  -7.8292170e+00   7.9131395e+00  -3.3492299e+00
   2.4368646e+01  -2.6401800e+01   2.0000000e+02  -7.6464169e+00   7.8181521e+00  -3.1547897e+00
   2.4456347e+01  -2.6300007e+01   2.0000000e+02  -7.4748092e+00   7.6851251e+00  -3.0118949e+00
   2.4537086e+01  -2.6193732e+01   2.0000000e+02  -7.3186033e+00   7.5208749e+00  -2.9289738e+00
   2.4610595e+01  -2.6083355e+01   2.0000000e+02  -7.1787704e+00   7.3333616e+00  -2.9146246e+00
   2.4676637e+01  -2.5969265e+01   2.0000000e+02  -7.0526848e+00   7.1309789e+00  -2.9768528e+00
   2.4734999e+01  -2.5851867e+01   2.0000000e+02  -6.9339563e+00   6.9216504e+00  -3.1222176e+00
   2.4785500e+01  -2.5731573e+01   2.0000000e+02  -6.8125480e+00   6.7117641e+00  -3.3547959e+00
   2.4827988e+01  -2.5608807e+01   2.0000000e+02  -6.6753836e+00   6.5051330e+00  -3.6750548e+00
   2.4862338e+01  -2.5483997e+01   2.0000000e+02  -6.5075441e+00   6.3020971e+00  -4.0788602e+00
   2.4888458e+01  -2.5357578e+01   2.0000000e+02  -6.2940721e+00   6.0989675e+00  -4.5567890e+00
   2.4906283e+01  -2.5229992e+01   2.0000000e+02  -6.0220821e+00   5.8879917e+00  -5.0942605e+00
   2.4915777e+01  -2.5101678e+01   2.0000000e+02  -5.6826859e+00   5.6579053e+00  -5.6725700e+00
   2.4916933e+01  -2.4973082e+01   2.0000000e+02  -5.2722284e+00   5.3951221e+00  -6.2705814e+00
   2.4909775e+01  -2.4844645e+01   2.0000000e+02  -4.7923674e+00   5.0853525e+00  -6.8667807e+00
   2.4894352e+01  -2.4716810e+01   2.0000000e+02  -4.2491213e+00   4.7154672e+00  -7.4409263e+00
   2.4870742e+01  -2.4590012e+01   2.0000000e+02  -3.6512782e+00   4.2752158e+00  -7.9748877e+00
   2.4839050e+01  -2.4464685e+01   2.0000000e+02  -3.0089402e+00   3.7586037e+00  -8.4525906e+00
   2.4799409e+01  -2.4341255e+01   2.0000000e+02  -2.3326520e+00   3.1646494e+00  -8.8595188e+00
   2.4751974e+01  -2.4220141e+01   2.0000000e+02  -1.6333103e+00   2.4974898e+00  -9.1823370e+00
   2.4696929e+01  -2.4101753e+01   2.0000000e+02  -9.2259482e-01   1.7658781e+00  -9.4090313e+00
   2.4634479e+01  -2.3986490e+01   2.0000000e+02  -2.1329404e-01   9.8214212e-01  -9.5297852e+00
   2.4564853e+01  -2.3874741e+01   2.0000000e+02   4.8082213e-01   1.6085874e-01  -9.5381395e+00
   2.4488303e+01  -2.3766879e+01   2.0000000e+02   1.1458206e+00  -6.8262330e-01  -9.4319566e+00
   2.4405102e+01  -2.3663268e+01   2.0000000e+02   1.7688156e+00  -1.5334822e+00  -9.2137249e+00
   2.4315542e+01  -2.3564252e+01   2.0000000e+02   2.3392271e+00  -2.3785026e+00  -8.8899726e+00
   2.4219935e+01  -2.3470163e+01   2.0000000e+02   2.8495698e+00  -3.2066193e+00  -8.4700656e+00
   2.4118612e+01  -2.3381312e+01   2.0000000e+02   3.2957066e+00  -4.0090999e+00  -7.9647120e+00
   2.4011919e+01  -2.3297997e+01   2.0000000e+02   3.6765799e+00  -4.7792946e+00  -7.3846996e+00
   2.3900219e+01  -2.3220492e+01   2.0000000e+02   3.9936730e+00  -5.5122036e+00  -6.7400368e+00
   2.3783890e+01  -2.3149056e+01   2.0000000e+02   4.2504799e+00  -6.2039206e+00  -6.0397329e+00
   2.3663323e+01  -2.3083923e+01   2.0000000e+02   4.4521539e+00  -6.8512374e+00  -5.2919538e+00
   2.3538921e+01  -2.3025309e+01   2.0000000e+02   4.6053731e+00  -7.4513987e+00  -4.5045030e+00
   2.3411099e+01  -2.2973408e+01   2.0000000e+02   4.7183171e+00  -8.0021515e+00  -3.6852561e+00
   2.3280279e+01  -2.2928390e+01   2.0000000e+02   4.8006128e+00  -8.5020321e+00  -2.8423626e+00
   2.3146896e+01  -2.2890403e+01   2.0000000e+02   4.8631000e+00  -8.9507242e+00  -1.9841689e+00
   2.3011388e+01  -2.2859574e+01   2.0000000e+02   4.9174103e+00  -9.3494004e+00  -1.1186852e+00
   2.2874203e+01  -2.2836002e+01   2.0000000e+02   4.9753241e+00  -9.7007189e+00  -2.5284364e-01
   2.2735790e+01  -2.2819766e+01   2.0000000e+02   5.0481611e+00  -1.0008357e+01   6.0828712e-01
   2.2596604e+01  -2.2810919e+01   2.0000000e+02   5.1461963e+00  -1.0275981e+01   1.4619415e+00
   2.2457102e+01  -2.2809489e+01   2.0000000e+02   5.2783040e+00  -1.0505851e+01   2.3074413e+00
   2.2317740e+01  -2.2815482e+01   2.0000000e+02   5.4518263e+00  -1.0697423e+01   3.1450715e+00
   2.2178975e+01  -2.2828878e+01   2.0000000e+02   5.6725503e+00  -1.0846478e+01   3.9741002e+00
   2.2041264e+01  -2.2849633e+01   2.0000000e+02   5.9447314e+00  -1.0945261e+01   4.7903266e+00
   2.1905057e+01  -2.2877679e+01   2.0000000e+02   6.2709787e+00  -1.0983859e+01   5.5838767e+00
   2.1770803e+01  -2.2912923e+01   2.0000000e+02   6.6518897e+00  -1.0952641e+01   6.3378894e+00
   2.1638945e+01  -2.2955249e+01   2.0000000e+02   7.0855022e+00  -1.0845176e+01   7.0288234e+00
   2.1509917e+01  -2.3004519e+01   2.0000000e+02   7.5666738e+00  -1.0660795e+01   7.6284821e+00
   2.1384148e+01  -2.3060570e+01   2.0000000e+02   8.0865874e+00  -1.0406009e+01   8.1073567e+00
   2.1262056e+01  -2.3123216e+01   2.0000000e+02   8.6326723e+00  -1.0094348e+01   8.4385395e+00
   2.1144048e+01  -2.3192253e+01   2.0000000e+02   9.1890033e+00  -9.7447178e+00   8.6011413e+00
   2.1030521e+01  -2.3267450e+01   2.0000000e+02   9.7370296e+00  -9.3788684e+00   8.5826817e+00
   2.0921856e+01  -2.3348559e+01   2.0000000e+02   1.0256708e+01  -9.0186538e+00   8.3800019e+00
   2.0818423e+01  -2.3435312e+01   2.0000000e+02   1.0727672e+01  -8.6837729e+00   7.9990349e+00
   2.0720575e+01  -2.3527420e+01   2.0000000e+02   1.1130479e+01  -8.3902004e+00   7.4538697e+00
   2.0199822e+01  -2.4001405e+01   2.0000000e+02   1.1599944e+01  -7.5238180e+00   4.2440950e+00
   2.0141510e+01  -2.4118786e+01   2.0000000e+02   1.1427816e+01  -7.5811536e+00   3.2509053e+00
   2.0090327e+01  -2.4238925e+01   2.0000000e+02   1.1165818e+01  -7.6662450e+00   2.2702640e+00
   2.0046449e+01  -2.4361457e+01   2.0000000e+02   1.0825215e+01  -7.7666322e+00   1.3133834e+00
   2.0010028e+01  -2.4486012e+01   2.0000000e+02   1.0416543e+01  -7.8713508e+00   3.8641882e-01
   1.9981199e+01  -2.4612209e+01   2.0000000e+02   9.9483683e+00  -7.9719001e+00  -5.0770196e-01
   1.9960072e+01  -2.4739664e+01   2.0000000e+02   9.4270376e+00  -8.0627059e+00  -1.3672478e+00
   1.9946734e+01  -2.4867988e+01   2.0000000e+02   8.8574218e+00  -8.1410877e+00  -2.1900936e+00
   1.9941251e+01  -2.4996785e+01   2.0000000e+02   8.2442036e+00  -8.2068386e+00  -2.9731424e+00
   1.9943665e+01  -2.5125660e+01   2.0000000e+02   7.5930405e+00  -8.2615565e+00  -3.7128714e+00
   1.9953993e+01  -2.5254214e+01   2.0000000e+02   6.9112211e+00  -8.3078089e+00  -4.4065477e+00
   1.9972227e+01  -2.5382048e+01   2.0000000e+02   6.2074976e+00  -8.3481881e+00  -5.0536852e+00
   1.9998337e+01  -2.5508767e+01   2.0000000e+02   5.4912342e+00  -8.3842699e+00  -5.6571083e+00
   2.0032267e+01  -2.5633974e+01   2.0000000e+02   4.7712335e+00  -8.4155394e+00  -6.2231543e+00
   2.0073934e+01  -2.5757277e+01   2.0000000e+02   4.0544820e+00  -8.4384374e+00  -6.7610012e+00
   2.0123232e+01  -2.5878290e+01   2.0000000e+02   3.3452597e+00  -8.4457429e+00  -7.2811243e+00
   2.0180029e+01  -2.5996631e+01   2.0000000e+02   2.6448536e+00  -8.4265460e+00  -7.7931188e+00
   2.0244169e+01  -2.6111927e+01   2.0000000e+02   1.9519635e+00  -8.3669807e+00  -8.3034181e+00
   2.0315471e+01  -2.6223812e+01   2.0000000e+02   1.2638596e+00  -8.2517217e+00  -8.8133927e+00
   2.0393729e+01  -2.6331930e+01   2.0000000e+02   5.7799495e-01  -8.0660307e+00  -9.3184181e+00
   2.0478713e+01  -2.6435937e+01   2.0000000e+02  -1.0631828e-01  -7.7979279e+00  -9.8082495e+00
   2.0570170e+01  -2.6535500e+01   2.0000000e+02  -7.8667416e-01  -7.4399772e+00  -1.0268687e+01
   2.0667823e+01  -2.6630299e+01   2.0000000e+02  -1.4572400e+00  -6.9902320e+00  -1.0684091e+01
   2.0771375e+01  -2.6720030e+01   2.0000000e+02  -2.1094761e+00  -6.4520971e+00  -1.1040042e+01
   2.0880505e+01  -2.6804403e+01   2.0000000e+02  -2.7336613e+00  -5.8332663e+00  -1.1325324e+01
   2.0994874e+01  -2.6883145e+01   2.0000000e+02  -3.3208250e+00  -5.1440726e+00  -1.1532825e+01
   2.1114122e+01  -2.6956002e+01   2.0000000e+02  -3.8644490e+00  -4.3958745e+00  -1.1659202e+01
   2.1237872e+01  -2.7022735e+01   2.0000000e+02  -4.3614984e+00  -3.5998884e+00  -1.1703820e+01
   2.1365730e+01  -2.7083129e+01   2.0000000e+02  -4.8126680e+00  -2.7666731e+00  -1.1667439e+01
   2.1497286e+01  -2.7136986e+01   2.0000000e+02  -5.2218284e+00  -1.9062128e+00  -1.1551301e+01
   2.1632116e+01  -2.7184130e+01   2.0000000e+02  -5.5950745e+00  -1.0282685e+00  -1.1356756e+01
   2.1769783e+01  -2.7224407e+01   2.0000000e+02  -5.9396166e+00  -1.4277746e-01  -1.1085452e+01
   2.1909840e+01  -2.7257685e+01   2.0000000e+02  -6.2627655e+00   7.3987453e-01  -1.0739819e+01
   2.2051831e+01  -2.7283854e+01   2.0000000e+02  -6.5710907e+00   1.6087048e+00  -1.0323650e+01
   2.2195291e+01  -2.7302829e+01   2.0000000e+02  -6.8697334e+00   2.4521209e+00  -9.8426460e+00
   2.2339751e+01  -2.7314548e+01   2.0000000e+02  -7.1618272e+00   3.2581304e+00  -9.3049185e+00
   2.2484736e+01  -2.7318972e+01   2.0000000e+02  -7.4480186e+00   4.0148492e+00  -8.7213471e+00
   2.2629772e+01  -2.7316086e+01   2.0000000e+02  -7.7261885e+00   4.7114611e+00  -8.1055725e+00
   2.2774382e+01  -2.7305899e+01   2.0000000e+02  -7.9914602e+00   5.3393827e+00  -7.4734543e+00
   2.2918092e+01  -2.7288447e+01   2.0000000e+02  -8.2366436e+00   5.8933846e+00  -6.8417849e+00
   2.3060430e+01  -2.7263784e+01   2.0000000e+02  -8.4531049e+00   6.3721125e+00  -6.2266158e+00
   2.3200932e+01  -2.7231994e+01   2.0000000e+02  -8.6319871e+00   6.7778672e+00  -5.6413628e+00
   2.3339140e+01  -2.7193180e+01   2.0000000e+02  -8.7655302e+00   7.1155605e+00  -5.0956154e+00
   2.3474603e+01  -2.7147468e+01   2.0000000e+02  -8.8482446e+00   7.3913329e+00  -4.5946674e+00
   2.3606883e+01  -2.7095010e+01   2.0000000e+02  -8.8777124e+00   7.6112435e+00  -4.1398773e+00
   2.3735554e+01  -2.7035976e+01   2.0000000e+02  -8.8548820e+00   7.7803265e+00  -3.7297635e+00
   2.3860202e+01  -2.6970559e+01   2.0000000e+02  -8.7839105e+00   7.9021779e+00  -3.3612604e+00
   2.3980429e+01  -2.6898972e+01   2.0000000e+02  -8.6716422e+00   7.9789996e+00  -3.0309967e+00
   2.4095855e+01  -2.6821447e+01   2.0000000e+02  -8.5268588e+00   8.0119784e+00  -2.7363786e+00
   2.4206117e+01  -2.6738237e+01   2.0000000e+02  -8.3594190e+00   8.0018799e+00  -2.4763801e+00
   2.4310869e+01  -2.6649610e+01   2.0000000e+02  -8.1793535e+00   7.9497411e+00  -2.2520153e+00
   2.4409789e+01  -2.6555852e+01   2.0000000e+02  -7.9960230e+00   7.8575251e+00  -2.0663053e+00
   2.4502573e+01  -2.6457265e+01   2.0000000e+02  -7.8173833e+00   7.7286124e+00  -1.9240186e+00
   2.4588941e+01  -2.6354166e+01   2.0000000e+02  -7.6494147e+00   7.5680162e+00  -1.8310847e+00
   2.4668634e+01  -2.6246885e+01   2.0000000e+02  -7.4957123e+00   7.3822876e+00  -1.7939989e+00
   2.4741417e+01  -2.6135763e+01   2.0000000e+02  -7.3572008e+00   7.1791186e+00  -1.8192259e+00
   2.4807080e+01  -2.6021155e+01   2.0000000e+02  -7.2319367e+00   6.9667132e+00  -1.9126554e+00
   2.4865436e+01  -2.5903424e+01   2.0000000e+02  -7.1149786e+00   6.7529831e+00  -2.0791048e+00
   2.4916324e+01  -2.5782941e+01   2.0000000e+02  -6.9984407e+00   6.5446203e+00  -2.3216562e+00
   2.4959606e+01  -2.5660088e+01   2.0000000e+02  -6.8718580e+00   6.3461437e+00  -2.6408874e+00
   2.4995171e+01  -2.5535249e+01   2.0000000e+02  -6.7229919e+00   6.1589956e+00  -3.0340890e+00
   2.5022932e+01  -2.5408816e+01   2.0000000e+02  -6.5391389e+00   5.9808967e+00  -3.4946568e+00
   2.5042827e+01  -2.5281183e+01   2.0000000e+02  -6.3087706e+00   5.8055809e+00  -4.0120057e+00
   2.5054820e+01  -2.5152747e+01   2.0000000e+02  -6.0231719e+00   5.6230645e+00  -4.5721368e+00
   2.5058898e+01  -2.5023907e+01   2.0000000e+02  -5.6775849e+00   5.4204903e+00  -5.1588840e+00
   2.5055074e+01  -2.4895061e+01   2.0000000e+02  -5.2714773e+00   5.1834572e+00  -5.7554378e+00
   2.5043384e+01  -2.4766605e+01   2.0000000e+02  -4.8078602e+00   4.8976682e+00  -6.3456657e+00
   2.5023889e+01  -2.4638934e+01   2.0000000e+02  -4.2920102e+00   4.5506281e+00  -6.9147097e+00
   2.4996672e+01  -2.4512440e+01   2.0000000e+02  -3.7301632e+00   4.1331214e+00  -7.4488190e+00
   2.4961839e+01  -2.4387508e+01   2.0000000e+02  -3.1287696e+00   3.6402483e+00  -7.9346442e+00
   2.4919517e+01  -2.4264519e+01   2.0000000e+02  -2.4945869e+00   3.0719302e+00  -8.3585797e+00
   2.4869858e+01  -2.4143846e+01   2.0000000e+02  -1.8354002e+00   2.4328280e+00  -8.7067018e+00
   2.4813030e+01  -2.4025855e+01   2.0000000e+02  -1.1608306e+00   1.7317384e+00  -8.9656104e+00
   2.4749225e+01  -2.3910902e+01   2.0000000e+02  -4.8274053e-01   9.8059887e-01  -9.1238606e+00
   2.4678653e+01  -2.3799333e+01   2.0000000e+02   1.8519926e-01   1.9323365e-01  -9.1735960e+00
   2.4601542e+01  -2.3691484e+01   2.0000000e+02   8.2866759e-01  -6.1595015e-01  -9.1116819e+00
   2.4518139e+01  -2.3587677e+01   2.0000000e+02   1.4342191e+00  -1.4331496e+00  -8.9399479e+00
   2.4428707e+01  -2.3488223e+01   2.0000000e+02   1.9906636e+00  -2.2460472e+00  -8.6645135e+00
   2.4333526e+01  -2.3393420e+01   2.0000000e+02   2.4899102e+00  -3.0443313e+00  -8.2944495e+00
   2.4232891e+01  -2.3303550e+01   2.0000000e+02   2.9271635e+00  -3.8198577e+00  -7.8402291e+00
   2.4127110e+01  -2.3218880e+01   2.0000000e+02   3.3005850e+00  -4.5664862e+00  -7.3123970e+00
   2.4016507e+01  -2.3139661e+01   2.0000000e+02   3.6106942e+00  -5.2797066e+00  -6.7207048e+00
   2.3901417e+01  -2.3066128e+01   2.0000000e+02   3.8598339e+00  -5.9562150e+00  -6.0737610e+00
   2.3782186e+01  -2.2998499e+01   2.0000000e+02   4.0518366e+00  -6.5934993e+00  -5.3791143e+00
   2.3659173e+01  -2.2936974e+01   2.0000000e+02   4.1919451e+00  -7.1895286e+00  -4.6436025e+00
   2.3532744e+01  -2.2881734e+01   2.0000000e+02   4.2869088e+00  -7.7426384e+00  -3.8737363e+00
   2.3403276e+01  -2.2832943e+01   2.0000000e+02   4.3450562e+00  -8.2515567e+00  -3.0760313e+00
   2.3271152e+01  -2.2790743e+01   2.0000000e+02   4.3761980e+00  -8.7156322e+00  -2.2570670e+00
   2.3136763e+01  -2.2755261e+01   2.0000000e+02   4.3913035e+00  -9.1350994e+00  -1.4233533e+00
   2.3000505e+01  -2.2726598e+01   2.0000000e+02   4.4019032e+00  -9.5113136e+00  -5.8084048e-01
   2.2862778e+01  -2.2704841e+01   2.0000000e+02   4.4194540e+00  -9.8466968e+00   2.6566230e-01
   2.2723987e+01  -2.2690053e+01   2.0000000e+02   4.4546580e+00  -1.0144277e+01   1.1131215e+00
   2.2584540e+01  -2.2682277e+01   2.0000000e+02   4.5169999e+00  -1.0406748e+01   1.9605812e+00
   2.2444845e+01  -2.2681537e+01   2.0000000e+02   4.6145170e+00  -1.0635205e+01   2.8088761e+00
   2.2305312e+01  -2.2687833e+01   2.0000000e+02   4.7537742e+00  -1.0827897e+01   3.6595270e+00
   2.2166349e+01  -2.2701149e+01   2.0000000e+02   4.9400685e+00  -1.0979475e+01   4.5128637e+00
   2.2028364e+01  -2.2721445e+01   2.0000000e+02   5.1775576e+00  -1.1081167e+01   5.3657163e+00
   2.1891764e+01  -2.2748660e+01   2.0000000e+02   5.4693004e+00  -1.1122096e+01   6.2092384e+00
   2.1756948e+01  -2.2782716e+01   2.0000000e+02   5.8170517e+00  -1.1091604e+01   7.0276039e+00
   2.1624315e+01  -2.2823512e+01   2.0000000e+02   6.2207014e+00  -1.0982085e+01   7.7980379e+00
   2.1494256e+01  -2.2870928e+01   2.0000000e+02   6.6776250e+00  -1.0791548e+01   8.4925350e+00
   2.1367156e+01  -2.2924823e+01   2.0000000e+02   7.1820311e+00  -1.0525188e+01   9.0808732e+00
   2.1243394e+01  -2.2985041e+01   2.0000000e+02   7.7246317e+00  -1.0195476e+01   9.5342470e+00
   2.1123337e+01  -2.3051401e+01   2.0000000e+02   8.2926140e+00  -9.8207760e+00   9.8288072e+00
   2.1007347e+01  -2.3123709e+01   2.0000000e+02   8.8701739e+00  -9.4229710e+00   9.9480398e+00
   2.0895771e+01  -2.3201751e+01   2.0000000e+02   9.4392447e+00  -9.0247446e+00   9.8840955e+00
   2.0788949e+01  -2.3285295e+01   2.0000000e+02   9.9804556e+00  -8.6472333e+00   9.6377998e+00
   2.0687205e+01  -2.3374093e+01   2.0000000e+02   1.0474189e+01  -8.3083145e+00   9.2179795e+00
   2.0590851e+01  -2.3467881e+01   2.0000000e+02   1.0901690e+01  -8.0216521e+00   8.6403593e+00
   2.0500185e+01  -2.3566380e+01   2.0000000e+02   1.1246266e+01  -7.7962555e+00   7.9263247e+00
   2.0415492e+01  -2.3669296e+01   2.0000000e+02   1.1494554e+01  -7.6363622e+00   7.1015104e+00
   2.0337036e+01  -2.3776322e+01   2.0000000e+02   1.1637695e+01  -7.5415038e+00   6.1940967e+00
   2.0265068e+01  -2.3887135e+01   2.0000000e+02   1.1672163e+01  -7.5068435e+00   5.2327263e+00
   1.9872619e+01  -2.4456908e+01   2.0000000e+02   1.0365096e+01  -7.7085992e+00   1.3164146e+00
   1.9843646e+01  -2.4582259e+01   2.0000000e+02   9.9358933e+00  -7.8384561e+00   4.3118454e-01
   1.9821870e+01  -2.4708814e+01   2.0000000e+02   9.4530890e+00  -7.9570158e+00  -4.2473189e-01
   1.9807371e+01  -2.4836229e+01   2.0000000e+02   8.9196748e+00  -8.0613279e+00  -1.2489700e+00
   1.9800211e+01  -2.4964157e+01   2.0000000e+02   8.3385839e+00  -8.1506312e+00  -2.0374339e+00
   1.9800432e+01  -2.5092250e+01   2.0000000e+02   7.7140260e+00  -8.2258953e+00  -2.7847977e+00
   1.9808056e+01  -2.5220157e+01   2.0000000e+02   7.0523262e+00  -8.2892993e+00  -3.4857897e+00
   1.9823087e+01  -2.5347527e+01   2.0000000e+02   6.3619929e+00  -8.3436416e+00  -4.1368213e+00
   1.9845505e+01  -2.5474009e+01   2.0000000e+02   5.6530862e+00  -8.3916263e+00  -4.7373488e+00
   1.9875274e+01  -2.5599254e+01   2.0000000e+02   4.9360942e+00  -8.4350059e+00  -5.2907319e+00
   1.9912332e+01  -2.5722915e+01   2.0000000e+02   4.2206223e+00  -8.4736272e+00  -5.8041912e+00
   1.9956600e+01  -2.5844648e+01   2.0000000e+02   3.5141749e+00  -8.5045371e+00  -6.2880198e+00
   2.0007978e+01  -2.5964113e+01   2.0000000e+02   2.8212852e+00  -8.5213792e+00  -6.7539595e+00
   2.0066343e+01  -2.6080976e+01   2.0000000e+02   2.1432114e+00  -8.5143245e+00  -7.2130545e+00
   2.0131552e+01  -2.6194910e+01   2.0000000e+02   1.4783522e+00  -8.4706985e+00  -7.6733986e+00
   2.0203442e+01  -2.6305592e+01   2.0000000e+02   8.2338857e-01  -8.3763115e+00  -8.1382524e+00
   2.0281830e+01  -2.6412711e+01   2.0000000e+02   1.7484992e-01  -8.2172959e+00  -8.6050612e+00
   2.0366512e+01  -2.6515963e+01   2.0000000e+02  -4.6915858e-01  -7.9820789e+00  -9.0656802e+00
   2.0457264e+01  -2.6615054e+01   2.0000000e+02  -1.1076767e+00  -7.6630271e+00  -9.5078263e+00
   2.0553845e+01  -2.6709702e+01   2.0000000e+02  -1.7364101e+00  -7.2573402e+00  -9.9173581e+00
   2.0655992e+01  -2.6799637e+01   2.0000000e+02  -2.3481928e+00  -6.7670168e+00  -1.0280673e+01
   2.0763428e+01  -2.6884600e+01   2.0000000e+02  -2.9342775e+00  -6.1979122e+00  -1.0586654e+01
   2.0875855e+01  -2.6964348e+01   2.0000000e+02  -3.4860526e+00  -5.5583098e+00  -1.0827518e+01
   2.0992960e+01  -2.7038650e+01   2.0000000e+02  -3.9966582e+00  -4.8574374e+00  -1.0998671e+01
   2.1114417e+01  -2.7107293e+01   2.0000000e+02  -4.4621538e+00  -4.1043910e+00  -1.1097730e+01
   2.1239880e+01  -2.7170077e+01   2.0000000e+02  -4.8819250e+00  -3.3077669e+00  -1.1123323e+01
   2.1368996e+01  -2.7226821e+01   2.0000000e+02  -5.2585055e+00  -2.4757495e+00  -1.1074191e+01
   2.1501393e+01  -2.7277360e+01   2.0000000e+02  -5.5968648e+00  -1.6166581e+00  -1.0948846e+01
   2.1636693e+01  -2.7321546e+01   2.0000000e+02  -5.9035692e+00  -7.3935551e-01  -1.0745835e+01
   2.1774505e+01  -2.7359252e+01   2.0000000e+02  -6.1859443e+00   1.4642034e-01  -1.0464311e+01
   2.1914431e+01  -2.7390367e+01   2.0000000e+02  -6.4513688e+00   1.0299816e+00  -1.0104727e+01
   2.2056064e+01  -2.7414799e+01   2.0000000e+02  -6.7066832e+00   1.8997014e+00  -9.6694281e+00
   2.2198993e+01  -2.7432479e+01   2.0000000e+02  -6.9576351e+00   2.7431430e+00  -9.1631336e+00
   2.2342800e+01  -2.7443353e+01   2.0000000e+02  -7.2082846e+00   3.5472817e+00  -8.5934634e+00
   2.2487067e+01  -2.7447391e+01   2.0000000e+02  -7.4604466e+00   4.2991458e+00  -7.9712670e+00
   2.2631371e+01  -2.7444580e+01   2.0000000e+02  -7.7132302e+00   4.9867961e+00  -7.3107815e+00
   2.2775291e+01  -2.7434929e+01   2.0000000e+02  -7.9628809e+00   5.6007081e+00  -6.6291047e+00
   2.2918408e+01  -2.7418466e+01   2.0000000e+02  -8.2030208e+00   6.1350433e+00  -5.9449888e+00
   2.3060304e+01  -2.7395238e+01   2.0000000e+02  -8.4253402e+00   6.5883987e+00  -5.2770085e+00
   2.3200566e+01  -2.7365315e+01   2.0000000e+02  -8.6206726e+00   6.9637206e+00  -4.6414806e+00
   2.3338786e+01  -2.7328783e+01   2.0000000e+02  -8.7802624e+00   7.2673158e+00  -4.0508554e+00
   2.3474565e+01  -2.7285749e+01   2.0000000e+02  -8.8969682e+00   7.5073470e+00  -3.5128093e+00
   2.3607511e+01  -2.7236338e+01   2.0000000e+02  -8.9661755e+00   7.6922246e+00  -3.0303605e+00
   2.3737242e+01  -2.7180694e+01   2.0000000e+02  -8.9862837e+00   7.8293430e+00  -2.6026785e+00
   2.3863387e+01  -2.7118979e+01   2.0000000e+02  -8.9587523e+00   7.9243374e+00  -2.2263442e+00
   2.3985587e+01  -2.7051372e+01   2.0000000e+02  -8.8877901e+00   7.9808751e+00  -1.8967156e+00
   2.4103496e+01  -2.6978068e+01   2.0000000e+02  -8.7798077e+00   8.0008843e+00  -1.6091782e+00
   2.4216785e+01  -2.6899280e+01   2.0000000e+02  -8.6427405e+00   7.9850863e+00  -1.3601037e+00
   2.4325137e+01  -2.6815234e+01   2.0000000e+02  -8.4853080e+00   7.9337049e+00  -1.1475917e+00
   2.4428253e+01  -2.6726171e+01   2.0000000e+02  -8.3162705e+00   7.8472210e+00  -9.7170023e-01
   2.4525851e+01  -2.6632348e+01   2.0000000e+02  -8.1437361e+00   7.7270362e+00  -8.3435025e-01
   2.4617666e+01  -2.6534033e+01   2.0000000e+02  -7.9745647e+00   7.5759323e+00  -7.3893894e-01
   2.4703453e+01  -2.6431505e+01   2.0000000e+02  -7.8139351e+00   7.3982439e+00  -6.8972354e-01
   2.4782984e+01  -2.6325057e+01   2.0000000e+02  -7.6650796e+00   7.1997611e+00  -6.9122888e-01
   2.4856053e+01  -2.6214991e+01   2.0000000e+02  -7.5291315e+00   6.9873904e+00  -7.4776152e-01
   2.4922472e+01  -2.6101616e+01   2.0000000e+02  -7.4050461e+00   6.7686701e+00  -8.6310854e-01
   2.4982074e+01  -2.5985254e+01   2.0000000e+02  -7.2895721e+00   6.5511588e+00  -1.0402335e+00
   2.5034713e+01  -2.5866231e+01   2.0000000e+02  -7.1772644e+00   6.3417184e+00  -1.2810307e+00
   2.5080263e+01  -2.5744879e+01   2.0000000e+02  -7.0606567e+00   6.1457231e+00  -1.5859300e+00
   2.5118620e+01  -2.5621539e+01   2.0000000e+02  -6.9306903e+00   5.9662400e+00  -1.9533830e+00
   2.5149700e+01  -2.5496552e+01   2.0000000e+02  -6.7774670e+00   5.8033022e+00  -2.3794407e+00
   2.5173439e+01  -2.5370266e+01   2.0000000e+02  -6.5913488e+00   5.6534235e+00  -2.8574614e+00
   2.5189795e+01  -2.5243029e+01   2.0000000e+02  -6.3641909e+00   5.5094781e+00  -3.3782905e+00
   2.5198747e+01  -2.5115193e+01   2.0000000e+02  -6.0904124e+00   5.3610682e+00  -3.9309056e+00
   2.5200293e+01  -2.4987107e+01   2.0000000e+02  -5.7674964e+00   5.1953643e+00  -4.5034820e+00
   2.5194453e+01  -2.4859124e+01   2.0000000e+02  -5.3957616e+00   4.9983420e+00  -5.0843630e+00
   2.5181265e+01  -2.4731592e+01   2.0000000e+02  -4.9774219e+00   4.7562301e+00  -5.6627051e+00
   2.5160787e+01  -2.4604858e+01   2.0000000e+02  -4.5154307e+00   4.4569690e+00  -6.2283203e+00
   2.5133098e+01  -2.4479266e+01   2.0000000e+02  -4.0126173e+00   4.0914635e+00  -6.7709121e+00
   2.5098292e+01  -2.4355155e+01   2.0000000e+02  -3.4715313e+00   3.6544727e+00  -7.2791206e+00
   2.5056485e+01  -2.4232861e+01   2.0000000e+02  -2.8951403e+00   3.1450638e+00  -7.7398348e+00
   2.5007809e+01  -2.4112712e+01   2.0000000e+02  -2.2879641e+00   2.5665750e+00  -8.1384119e+00
   2.4952412e+01  -2.3995031e+01   2.0000000e+02  -1.6571823e+00   1.9261715e+00  -8.4597921e+00
   2.4890461e+01  -2.3880133e+01   2.0000000e+02  -1.0131196e+00   1.2340393e+00  -8.6902951e+00
   2.4822137e+01  -2.3768323e+01   2.0000000e+02  -3.6879087e-01   5.0233271e-01  -8.8195523e+00
   2.4747639e+01  -2.3659901e+01   2.0000000e+02   2.6132028e-01  -2.5590967e-01  -8.8419036e+00
   2.4667178e+01  -2.3555153e+01   2.0000000e+02   8.6298801e-01  -1.0278713e+00  -8.7568938e+00
   2.4580981e+01  -2.3454357e+01   2.0000000e+02   1.4237724e+00  -1.8017542e+00  -8.5687673e+00
   2.4489288e+01  -2.3357781e+01   2.0000000e+02   1.9340787e+00  -2.5673475e+00  -8.2852528e+00
   2.4392353e+01  -2.3265678e+01   2.0000000e+02   2.3875081e+00  -3.3162934e+00  -7.9160336e+00
   2.4290440e+01  -2.3178292e+01   2.0000000e+02   2.7806143e+00  -4.0420713e+00  -7.4713639e+00
   2.4183827e+01  -2.3095853e+01   2.0000000e+02   3.1123124e+00  -4.7398218e+00  -6.9610423e+00
   2.4072800e+01  -2.3018576e+01   2.0000000e+02   3.3832721e+00  -5.4060942e+00  -6.3938519e+00
   2.3957657e+01  -2.2946665e+01   2.0000000e+02   3.5954727e+00  -6.0385075e+00  -5.7774456e+00
   2.3838706e+01  -2.2880307e+01   2.0000000e+02   3.7520639e+00  -6.6354793e+00  -5.1184571e+00
   2.3716262e+01  -2.2819677e+01   2.0000000e+02   3.8574837e+00  -7.1959688e+00  -4.4227670e+00
   2.3590649e+01  -2.2764933e+01   2.0000000e+02   3.9176633e+00  -7.7192904e+00  -3.6957494e+00
   2.3462196e+01  -2.2716217e+01   2.0000000e+02   3.9401759e+00  -8.2050261e+00  -2.9424577e+00
   2.3331240e+01  -2.2673656e+01   2.0000000e+02   3.9341630e+00  -8.6530295e+00  -2.1677374e+00
   2.3198125e+01  -2.2637362e+01   2.0000000e+02   3.9099961e+00  -9.0635593e+00  -1.3761934e+00
   2.3063198e+01  -2.2607429e+01   2.0000000e+02   3.8787031e+00  -9.4374661e+00  -5.7196881e-01
   2.2926808e+01  -2.2583934e+01   2.0000000e+02   3.8512907e+00  -9.7762713e+00   2.4161478e-01
   2.2789312e+01  -2.2566939e+01   2.0000000e+02   3.8381038e+00  -1.0081967e+01   1.0624669e+00
   2.2651066e+01  -2.2556488e+01   2.0000000e+02   3.8483264e+00  -1.0356469e+01   1.8901388e+00
   2.2512428e+01  -2.2552608e+01   2.0000000e+02   3.8897231e+00  -1.0600672e+01   2.7258055e+00
   2.2373758e+01  -2.2555309e+01   2.0000000e+02   3.9686321e+00  -1.0813340e+01   3.5716731e+00
   2.2235415e+01  -2.2564584e+01   2.0000000e+02   4.0901663e+00  -1.0990212e+01   4.4297068e+00
   2.2097758e+01  -2.2580409e+01   2.0000000e+02   4.2585106e+00  -1.1123673e+01   5.2997572e+00
   2.1961144e+01  -2.2602743e+01   2.0000000e+02   4.4771745e+00  -1.1203363e+01   6.1774892e+00
   2.1825929e+01  -2.2631528e+01   2.0000000e+02   4.7490483e+00  -1.1217764e+01   7.0526179e+00
   2.1692463e+01  -2.2666689e+01   2.0000000e+02   5.0761766e+00  -1.1156554e+01   7.9080839e+00
   2.1561096e+01  -2.2708134e+01   2.0000000e+02   5.4592423e+00  -1.1013214e+01   8.7204563e+00
   2.1432169e+01  -2.2755756e+01   2.0000000e+02   5.8969053e+00  -1.0787193e+01   9.4618175e+00
   2.1306022e+01  -2.2809431e+01   2.0000000e+02   6.3851264e+00  -1.0485061e+01   1.0102601e+01
   2.1182986e+01  -2.2869017e+01   2.0000000e+02   6.9167276e+00  -1.0120278e+01   1.0614968e+01
   2.1063386e+01  -2.2934361e+01   2.0000000e+02   7.4813534e+00  -9.7116957e+00   1.0975733e+01
   2.0947538e+01  -2.3005290e+01   2.0000000e+02   8.0656728e+00  -9.2812365e+00   1.1168517e+01
   2.0835752e+01  -2.3081620e+01   2.0000000e+02   8.6539890e+00  -8.8513877e+00   1.1184635e+01
   2.0728326e+01  -2.3163150e+01   2.0000000e+02   9.2289031e+00  -8.4430342e+00   1.1023140e+01
   2.0625550e+01  -2.3249666e+01   2.0000000e+02   9.7721404e+00  -8.0739825e+00   1.0690140e+01
   2.0527703e+01  -2.3340941e+01   2.0000000e+02   1.0265437e+01  -7.7581274e+00   1.0197937e+01
   2.0435052e+01  -2.3436734e+01   2.0000000e+02   1.0691546e+01  -7.5051067e+00   9.5641192e+00
   2.0347853e+01  -2.3536793e+01   2.0000000e+02   1.1035399e+01  -7.3202219e+00   8.8105501e+00
   2.0266347e+01  -2.3640853e+01   2.0000000e+02   1.1285296e+01  -7.2044678e+00   7.9622103e+00
   2.0190764e+01  -2.3748638e+01   2.0000000e+02   1.1433979e+01  -7.1547189e+00   7.0455944e+00
   2.0121319e+01  -2.3859862e+01   2.0000000e+02   1.1479276e+01  -7.1641100e+00   6.0867744e+00
   2.0058212e+01  -2.3974230e+01   2.0000000e+02   1.1424049e+01  -7.2227482e+00   5.1092971e+00
   2.0001628e+01  -2.4091435e+01   2.0000000e+02   1.1275322e+01  -7.3187445e+00   4.1323855e+00
   1.9951736e+01  -2.4211165e+01   2.0000000e+02   1.1042672e+01  -7.4394867e+00   3.1697817e+00
   1.9908688e+01  -2.4333099e+01   2.0000000e+02   1.0736268e+01  -7.5729141e+00   2.2297949e+00
   1.9658258e+01  -2.4964135e+01   2.0000000e+02   8.2516454e+00  -8.0536970e+00  -1.2590415e+00
   1.9658331e+01  -2.5092538e+01   2.0000000e+02   7.6445672e+00  -8.1496484e+00  -2.0075927e+00
   1.9665471e+01  -2.5220779e+01   2.0000000e+02   6.9954348e+00  -8.2308788e+00  -2.7097635e+00
   1.9679684e+01  -2.5348537e+01   2.0000000e+02   6.3127459e+00  -8.2999080e+00  -3.3597969e+00
   1.9700956e+01  -2.5475495e+01   2.0000000e+02   5.6070669e+00  -8.3596908e+00  -3.9548731e+00
   1.9729257e+01  -2.5601333e+01   2.0000000e+02   4.8900215e+00  -8.4129626e+00  -4.4961400e+00
   1.9764537e+01  -2.5725737e+01   2.0000000e+02   4.1729368e+00  -8.4613819e+00  -4.9890979e+00
   1.9806729e+01  -2.5848391e+01   2.0000000e+02   3.4655593e+00  -8.5045710e+00  -5.4432065e+00
   1.9855750e+01  -2.5968986e+01   2.0000000e+02   2.7748613e+00  -8.5392647e+00  -5.8707462e+00
   1.9911494e+01  -2.6087216e+01   2.0000000e+02   2.1043467e+00  -8.5588107e+00  -6.2849147e+00
   1.9973842e+01  -2.6202779e+01   2.0000000e+02   1.4539688e+00  -8.5532592e+00  -6.6976160e+00
   2.0042654e+01  -2.6315381e+01   2.0000000e+02   8.2078368e-01  -8.5101488e+00  -7.1171653e+00
   2.0117773e+01  -2.6424733e+01   2.0000000e+02   2.0032659e-01  -8.4159376e+00  -7.5466197e+00
   2.0199024e+01  -2.6530553e+01   2.0000000e+02  -4.1164931e-01  -8.2578274e+00  -7.9831052e+00
   2.0286214e+01  -2.6632570e+01   2.0000000e+02  -1.0175014e+00  -8.0255843e+00  -8.4183826e+00
   2.0379135e+01  -2.6730519e+01   2.0000000e+02  -1.6165075e+00  -7.7129154e+00  -8.8405388e+00
   2.0477561e+01  -2.6824146e+01   2.0000000e+02  -2.2045721e+00  -7.3180594e+00  -9.2362516e+00
   2.0581251e+01  -2.6913208e+01   2.0000000e+02  -2.7748271e+00  -6.8434540e+00  -9.5930528e+00
   2.0689946e+01  -2.6997472e+01   2.0000000e+02  -3.3189286e+00  -6.2946595e+00  -9.9008984e+00
   2.0803374e+01  -2.7076718e+01   2.0000000e+02  -3.8286973e+00  -5.6788825e+00  -1.0152750e+01
   2.0921248e+01  -2.7150738e+01   2.0000000e+02  -4.2976017e+00  -5.0036490e+00  -1.0344118e+01
   2.1043269e+01  -2.7219339e+01   2.0000000e+02  -4.7217917e+00  -4.2759781e+00  -1.0471971e+01
   2.1169124e+01  -2.7282339e+01   2.0000000e+02  -5.1004741e+00  -3.5022779e+00  -1.0533544e+01
   2.1298486e+01  -2.7339571e+01   2.0000000e+02  -5.4357445e+00  -2.6887846e+00  -1.0525539e+01
   2.1431022e+01  -2.7390886e+01   2.0000000e+02  -5.7320423e+00  -1.8422022e+00  -1.0443979e+01
   2.1566384e+01  -2.7436147e+01   2.0000000e+02  -5.9954240e+00  -9.7035193e-01  -1.0284681e+01
   2.1704218e+01  -2.7475234e+01   2.0000000e+02  -6.2329414e+00  -8.2411949e-02  -1.0044030e+01
   2.1844161e+01  -2.7508043e+01   2.0000000e+02  -6.4521099e+00   8.1104232e-01  -9.7197791e+00
   2.1985845e+01  -2.7534487e+01   2.0000000e+02  -6.6604621e+00   1.6981666e+00  -9.3116823e+00
   2.2128894e+01  -2.7554495e+01   2.0000000e+02  -6.8650580e+00   2.5659370e+00  -8.8220019e+00
   2.2272929e+01  -2.7568015e+01   2.0000000e+02  -7.0718925e+00   3.4003436e+00  -8.2559866e+00
   2.2417568e+01  -2.7575011e+01   2.0000000e+02  -7.2851950e+00   4.1867975e+00  -7.6224272e+00
   2.2562425e+01  -2.7575463e+01   2.0000000e+02  -7.5067473e+00   4.9110124e+00  -6.9341069e+00
   2.2707117e+01  -2.7569371e+01   2.0000000e+02  -7.7354064e+00   5.5604378e+00  -6.2077563e+00
   2.2851258e+01  -2.7556750e+01   2.0000000e+02  -7.9669821e+00   6.1258437e+00  -5.4633424e+00
   2.2994466e+01  -2.7537635e+01   2.0000000e+02  -8.1945935e+00   6.6027188e+00  -4.7223771e+00
   2.3136361e+01  -2.7512076e+01   2.0000000e+02  -8.4094779e+00   6.9918335e+00  -4.0057225e+00
   2.3276567e+01  -2.7480142e+01   2.0000000e+02  -8.6021271e+00   7.2988059e+00  -3.3312754e+00
   2.3414714e+01  -2.7441917e+01   2.0000000e+02  -8.7635546e+00   7.5327415e+00  -2.7122595e+00
   2.3550439e+01  -2.7397502e+01   2.0000000e+02  -8.8864304e+00   7.7043937e+00  -2.1564412e+00
   2.3683386e+01  -2.7347016e+01   2.0000000e+02  -8.9658930e+00   7.8243538e+00  -1.6663623e+00
   2.3813207e+01  -2.7290592e+01   2.0000000e+02  -8.9999445e+00   7.9016746e+00  -1.2403725e+00
   2.3939565e+01  -2.7228379e+01   2.0000000e+02  -8.9894343e+00   7.9431071e+00  -8.7400030e-01
   2.4062135e+01  -2.7160542e+01   2.0000000e+02  -8.9377408e+00   7.9529244e+00  -5.6141968e-01
   2.4180600e+01  -2.7087259e+01   2.0000000e+02  -8.8502725e+00   7.9332233e+00  -2.9681475e-01
   2.4294660e+01  -2.7008723e+01   2.0000000e+02  -8.7338734e+00   7.8845458e+00  -7.5330669e-02
   2.4404026e+01  -2.6925139e+01   2.0000000e+02  -8.5961948e+00   7.8066778e+00   1.0619576e-01
   2.4508422e+01  -2.6836727e+01   2.0000000e+02  -8.4450602e+00   7.6994717e+00   2.4899463e-01
   2.4607590e+01  -2.6743716e+01   2.0000000e+02  -8.2878443e+00   7.5635514e+00   3.5246784e-01
   2.4701285e+01  -2.6646349e+01   2.0000000e+02  -8.1309412e+00   7.4007970e+00   4.1461359e-01
   2.4789280e+01  -2.6544879e+01   2.0000000e+02  -7.9793459e+00   7.2145363e+00   4.3263904e-01
   2.4871364e+01  -2.6439568e+01   2.0000000e+02  -7.8363991e+00   7.0094810e+00   4.0355755e-01
   2.4947340e+01  -2.6330687e+01   2.0000000e+02  -7.7036808e+00   6.7914788e+00   3.2466508e-01
   2.5017033e+01  -2.6218517e+01   2.0000000e+02  -7.5810111e+00   6.5671356e+00   1.9389068e-01
   2.5080283e+01  -2.6103346e+01   2.0000000e+02  -7.4665056e+00   6.3434150e+00   9.8793119e-03
   2.5136947e+01  -2.5985467e+01   2.0000000e+02  -7.3566590e+00   6.1271458e+00  -2.2793717e-01
   2.5186903e+01  -2.5865180e+01   2.0000000e+02  -7.2464754e+00   5.9244244e+00  -5.1922750e-01
   2.5230044e+01  -2.5742792e+01   2.0000000e+02  -7.1296789e+00   5.7399488e+00  -8.6263047e-01
   2.5266284e+01  -2.5618612e+01   2.0000000e+02  -6.9990865e+00   5.5762693e+00  -1.2555126e+00
   2.5295552e+01  -2.5492953e+01   2.0000000e+02  -6.8472087e+00   5.4331468e+00  -1.6937603e+00
   2.5317797e+01  -2.5366131e+01   2.0000000e+02  -6.6670624e+00   5.3070882e+00  -2.1716899e+00
   2.5332986e+01  -2.5238464e+01   2.0000000e+02  -6.4530426e+00   5.1912401e+00  -2.6822929e+00
   2.5341104e+01  -2.5110271e+01   2.0000000e+02  -6.2015842e+00   5.0756958e+00  -3.2178147e+00
   2.5342152e+01  -2.4981871e+01   2.0000000e+02  -5.9113126e+00   4.9482245e+00  -3.7705299e+00
   2.5336150e+01  -2.4853584e+01   2.0000000e+02  -5.5825577e+00   4.7953340e+00  -4.3333352e+00
   2.5323136e+01  -2.4725725e+01   2.0000000e+02  -5.2163527e+00   4.6035319e+00  -4.8998732e+00
   2.5303161e+01  -2.4598612e+01   2.0000000e+02  -4.8133898e+00   4.3606337e+00  -5.4639196e+00
   2.5276298e+01  -2.4472555e+01   2.0000000e+02  -4.3734040e+00   4.0568807e+00  -6.0182175e+00
   2.5242631e+01  -2.4347866e+01   2.0000000e+02  -3.8954009e+00   3.6858495e+00  -6.5532468e+00
   2.5202263e+01  -2.4224848e+01   2.0000000e+02  -3.3787025e+00   3.2449379e+00  -7.0564644e+00
   2.5155311e+01  -2.4103801e+01   2.0000000e+02  -2.8244947e+00   2.7355133e+00  -7.5125154e+00
   2.5101907e+01  -2.3985020e+01   2.0000000e+02  -2.2372509e+00   2.1626552e+00  -7.9045198e+00
   2.5042198e+01  -2.3868793e+01   2.0000000e+02  -1.6254559e+00   1.5345578e+00  -8.2161512e+00
   2.4976345e+01  -2.3755401e+01   2.0000000e+02  -1.0013068e+00   8.6168390e-01  -8.4339118e+00
   2.4904522e+01  -2.3645119e+01   2.0000000e+02  -3.7944719e-01   1.5578674e-01  -8.5489422e+00
   2.4826917e+01  -2.3538210e+01   2.0000000e+02   2.2487765e-01  -5.7108829e-01  -8.5578737e+00
   2.4743728e+01  -2.3434933e+01   2.0000000e+02   7.9764856e-01  -1.3074107e+00  -8.4626184e+00
   2.4655167e+01  -2.3335535e+01   2.0000000e+02   1.3274245e+00  -2.0427903e+00  -8.2692758e+00
   2.4561458e+01  -2.3240254e+01   2.0000000e+02   1.8059544e+00  -2.7683106e+00  -7.9866284e+00
   2.4462834e+01  -2.3149316e+01   2.0000000e+02   2.2281001e+00  -3.4766703e+00  -7.6246347e+00
   2.4359540e+01  -2.3062940e+01   2.0000000e+02   2.5912575e+00  -4.1621188e+00  -7.1932737e+00
   2.4251828e+01  -2.2981331e+01   2.0000000e+02   2.8946620e+00  -4.8203830e+00  -6.7018013e+00
   2.4139963e+01  -2.2904682e+01   2.0000000e+02   3.1387713e+00  -5.4484848e+00  -6.1584644e+00
   2.4024215e+01  -2.2833175e+01   2.0000000e+02   3.3249893e+00  -6.0446031e+00  -5.5704708e+00
   2.3904864e+01  -2.2766980e+01   2.0000000e+02   3.4556838e+00  -6.6078731e+00  -4.9441034e+00
   2.3782195e+01  -2.2706254e+01   2.0000000e+02   3.5344634e+00  -7.1381831e+00  -4.2848165e+00
   2.3656504e+01  -2.2651139e+01   2.0000000e+02   3.5664918e+00  -7.6358921e+00  -3.5973280e+00
   2.3528089e+01  -2.2601767e+01   2.0000000e+02   3.5587145e+00  -8.1015889e+00  -2.8856598e+00
   2.3397254e+01  -2.2558253e+01   2.0000000e+02   3.5197793e+00  -8.5358837e+00  -2.1532017e+00
   2.3264310e+01  -2.2520700e+01   2.0000000e+02   3.4596985e+00  -8.9393315e+00  -1.4028254e+00
   2.3129570e+01  -2.2489197e+01   2.0000000e+02   3.3892658e+00  -9.3125265e+00  -6.3690403e-01
   2.2993353e+01  -2.2463818e+01   2.0000000e+02   3.3193577e+00  -9.6562313e+00   1.4274396e-01
   2.2855977e+01  -2.2444622e+01   2.0000000e+02   3.2602677e+00  -9.9714292e+00   9.3512001e-01
   2.2717767e+01  -2.2431654e+01   2.0000000e+02   3.2211810e+00  -1.0259062e+01   1.7403009e+00
   2.2579046e+01  -2.2424946e+01   2.0000000e+02   3.2098703e+00  -1.0519444e+01   2.5596561e+00
   2.2440140e+01  -2.2424512e+01   2.0000000e+02   3.2326088e+00  -1.0751365e+01   3.3956124e+00
   2.2301374e+01  -2.2430354e+01   2.0000000e+02   3.2943701e+00  -1.0951180e+01   4.2508777e+00
   2.2163073e+01  -2.2442458e+01   2.0000000e+02   3.3991433e+00  -1.1112212e+01   5.1270449e+00
   2.2025563e+01  -2.2460796e+01   2.0000000e+02   3.5503251e+00  -1.1224836e+01   6.0227676e+00
   2.1889167e+01  -2.2485325e+01   2.0000000e+02   3.7509997e+00  -1.1277452e+01   6.9319457e+00
   2.1754204e+01  -2.2515986e+01   2.0000000e+02   4.0039898e+00  -1.1258310e+01   7.8423744e+00
   2.1620993e+01  -2.2552708e+01   2.0000000e+02   4.3116373e+00  -1.1157878e+01   8.7353009e+00
   2.1489849e+01  -2.2595404e+01   2.0000000e+02   4.6752555e+00  -1.0971247e+01   9.5862848e+00
   2.1361081e+01  -2.2643974e+01   2.0000000e+02   5.0944678e+00  -1.0699911e+01   1.0367231e+01
   2.1234995e+01  -2.2698303e+01   2.0000000e+02   5.5665303e+00  -1.0352482e+01   1.1049208e+01
   2.1111892e+01  -2.2758262e+01   2.0000000e+02   6.0858783e+00  -9.9441007e+00   1.1605503e+01
   2.0992065e+01  -2.2823711e+01   2.0000000e+02   6.6439939e+00  -9.4947162e+00   1.2014193e+01
   2.0875802e+01  -2.2894493e+01   2.0000000e+02   7.2295089e+00  -9.0267612e+00   1.2259817e+01
   2.0763384e+01  -2.2970442e+01   2.0000000e+02   7.8286530e+00  -8.5627582e+00   1.2333970e+01
   2.0655083e+01  -2.3051378e+01   2.0000000e+02   8.4257336e+00  -8.1233670e+00   1.2235132e+01
   2.0551163e+01  -2.3137108e+01   2.0000000e+02   9.0037486e+00  -7.7261111e+00   1.1968004e+01
   2.0451879e+01  -2.3227427e+01   2.0000000e+02   9.5451015e+00  -7.3847271e+00   1.1542752e+01
   2.0357477e+01  -2.3322122e+01   2.0000000e+02   1.0032485e+01  -7.1089463e+00   1.0974283e+01
   2.0268192e+01  -2.3420965e+01   2.0000000e+02   1.0449881e+01  -6.9044578e+00   1.0281654e+01
   2.0184248e+01  -2.3523721e+01   2.0000000e+02   1.0783795e+01  -6.7729603e+00   9.4871720e+00
   2.0105859e+01  -2.3630143e+01   2.0000000e+02   1.1024398e+01  -6.7122656e+00   8.6152631e+00
   2.0033225e+01  -2.3739975e+01   2.0000000e+02   1.1166450e+01  -6.7165492e+00   7.6908512e+00
   1.9966537e+01  -2.3852954e+01   2.0000000e+02   1.1209675e+01  -6.7768933e+00   6.7374051e+00
   1.9905970e+01  -2.3968805e+01   2.0000000e+02   1.1158366e+01  -6.8820891e+00   5.7751089e+00
   1.9851686e+01  -2.4087250e+01   2.0000000e+02   1.1020232e+01  -7.0197506e+00   4.8193006e+00
   1.9803834e+01  -2.4208001e+01   2.0000000e+02   1.0804639e+01  -7.1774812e+00   3.8799481e+00
   1.9762549e+01  -2.4330765e+01   2.0000000e+02   1.0520685e+01  -7.3439529e+00   2.9620903e+00
   1.9727950e+01  -2.4455242e+01   2.0000000e+02   1.0175647e+01  -7.5096816e+00   2.0673493e+00
   1.9700141e+01  -2.4581127e+01   2.0000000e+02   9.7742472e+00  -7.6674359e+00   1.1959672e+00
   1.9679211e+01  -2.4708114e+01   2.0000000e+02   9.3189000e+00  -7.8122863e+00   3.4879082e-01
   1.9665231e+01  -2.4835888e+01   2.0000000e+02   8.8108469e+00  -7.9413884e+00  -4.7128121e-01
   1.9561507e+01  -2.5500819e+01   2.0000000e+02   5.4265814e+00  -8.2825603e+00  -3.2494487e+00
   1.9589726e+01  -2.5626946e+01   2.0000000e+02   4.7130405e+00  -8.3449493e+00  -3.7721544e+00
   1.9624627e+01  -2.5751714e+01   2.0000000e+02   3.9988080e+00  -8.4012061e+00  -4.2410423e+00
   1.9666153e+01  -2.5874835e+01   2.0000000e+02   3.2950892e+00  -8.4526179e+00  -4.6647260e+00
   1.9714228e+01  -2.5996026e+01   2.0000000e+02   2.6105606e+00  -8.4981023e+00  -5.0553914e+00
   1.9768761e+01  -2.6115005e+01   2.0000000e+02   1.9504228e+00  -8.5334837e+00  -5.4272533e+00
   1.9829646e+01  -2.6231497e+01   2.0000000e+02   1.3159474e+00  -8.5512409e+00  -5.7944174e+00
   1.9896760e+01  -2.6345231e+01   2.0000000e+02   7.0481866e-01  -8.5408971e+00  -6.1685092e+00
   1.9969966e+01  -2.6455941e+01   2.0000000e+02   1.1221831e-01  -8.4900845e+00  -6.5566397e+00
   2.0049110e+01  -2.6563367e+01   2.0000000e+02  -4.6752439e-01  -8.3861261e+00  -6.9601498e+00
   2.0134023e+01  -2.6667257e+01   2.0000000e+02  -1.0391134e+00  -8.2178185e+00  -7.3745388e+00
   2.0224521e+01  -2.6767366e+01   2.0000000e+02  -1.6047430e+00  -7.9770038e+00  -7.7905664e+00
   2.0320404e+01  -2.6863457e+01   2.0000000e+02  -2.1632438e+00  -7.6595411e+00  -8.1962147e+00
   2.0421461e+01  -2.6955302e+01   2.0000000e+02  -2.7101068e+00  -7.2654200e+00  -8.5789946e+00
   2.0527463e+01  -2.7042683e+01   2.0000000e+02  -3.2383026e+00  -6.7980512e+00  -8.9278482e+00
   2.0638171e+01  -2.7125392e+01   2.0000000e+02  -3.7396584e+00  -6.2629395e+00  -9.2343176e+00
   2.0753330e+01  -2.7203230e+01   2.0000000e+02  -4.2063697e+00  -5.6662491e+00  -9.4926001e+00
   2.0872674e+01  -2.7276011e+01   2.0000000e+02  -4.6323312e+00  -5.0136582e+00  -9.6987570e+00
   2.0995925e+01  -2.7343561e+01   2.0000000e+02  -5.0139633e+00  -4.3099005e+00  -9.8494474e+00
   2.1122795e+01  -2.7405716e+01   2.0000000e+02  -5.3504814e+00  -3.5590205e+00  -9.9407708e+00
   2.1252984e+01  -2.7462327e+01   2.0000000e+02  -5.6437006e+00  -2.7651433e+00  -9.9676142e+00
   2.1386183e+01  -2.7513257e+01   2.0000000e+02  -5.8975431e+00  -1.9333585e+00  -9.9237738e+00
   2.1522075e+01  -2.7558383e+01   2.0000000e+02  -6.1174950e+00  -1.0703666e+00  -9.8026458e+00
   2.1660335e+01  -2.7597595e+01   2.0000000e+02  -6.3101470e+00  -1.8473346e-01  -9.5981896e+00
   2.1800629e+01  -2.7630798e+01   2.0000000e+02  -6.4828612e+00   7.1318080e-01  -9.3058000e+00
   2.1942620e+01  -2.7657911e+01   2.0000000e+02  -6.6434737e+00   1.6114376e+00  -8.9229360e+00
   2.2085964e+01  -2.7678868e+01   2.0000000e+02  -6.7998884e+00   2.4966043e+00  -8.4495812e+00
   2.2230314e+01  -2.7693619e+01   2.0000000e+02  -6.9594762e+00   3.3538438e+00  -7.8887380e+00
   2.2375319e+01  -2.7702127e+01   2.0000000e+02  -7.1282838e+00   4.1671683e+00  -7.2471171e+00
   2.2520628e+01  -2.7704372e+01   2.0000000e+02  -7.3101911e+00   4.9202421e+00  -6.5358343e+00
   2.2665886e+01  -2.7700348e+01   2.0000000e+02  -7.5062141e+00   5.5977771e+00  -5.7708493e+00
   2.2810741e+01  -2.7690065e+01   2.0000000e+02  -7.7141651e+00   6.1874444e+00  -4.9725678e+00
   2.2954841e+01  -2.7673548e+01   2.0000000e+02  -7.9287724e+00   6.6816736e+00  -4.1644889e+00
   2.3097836e+01  -2.7650838e+01   2.0000000e+02  -8.1422808e+00   7.0788229e+00  -3.3709267e+00
   2.3239380e+01  -2.7621989e+01   2.0000000e+02  -8.3454448e+00   7.3832535e+00  -2.6143598e+00
   2.3379131e+01  -2.7587071e+01   2.0000000e+02  -8.5287189e+00   7.6042655e+00  -1.9130445e+00
   2.3516752e+01  -2.7546171e+01   2.0000000e+02  -8.6834471e+00   7.7542164e+00  -1.2794885e+00
   2.3651913e+01  -2.7499386e+01   2.0000000e+02  -8.8028489e+00   7.8463641e+00  -7.2010021e-01
   2.3784289e+01  -2.7446830e+01   2.0000000e+02  -8.8826154e+00   7.8929748e+00  -2.3579367e-01
   2.3913567e+01  -2.7388631e+01   2.0000000e+02  -8.9211239e+00   7.9040211e+00   1.7671652e-01
   2.4039440e+01  -2.7324929e+01   2.0000000e+02  -8.9193032e+00   7.8865737e+00   5.2326129e-01
   2.4161611e+01  -2.7255877e+01   2.0000000e+02  -8.8802694e+00   7.8448216e+00   8.1070386e-01
   2.4279795e+01  -2.7181642e+01   2.0000000e+02  -8.8088456e+00   7.7805505e+00   1.0456694e+00
   2.4393717e+01  -2.7102402e+01   2.0000000e+02  -8.7110457e+00   7.6939154e+00   1.2335761e+00
   2.4503114e+01  -2.7018346e+01   2.0000000e+02  -8.5935445e+00   7.5843267e+00   1.3781106e+00
   2.4607736e+01  -2.6929676e+01   2.0000000e+02  -8.4631513e+00   7.4512945e+00   1.4810998e+00
   2.4707347e+01  -2.6836603e+01   2.0000000e+02  -8.3262970e+00   7.2951018e+00   1.5426925e+00
   2.4801723e+01  -2.6739348e+01   2.0000000e+02  -8.1885715e+00   7.1172135e+00   1.5618189e+00
   2.4890655e+01  -2.6638142e+01   2.0000000e+02  -8.0543483e+00   6.9203849e+00   1.5368052e+00
   2.4973949e+01  -2.6533223e+01   2.0000000e+02  -7.9265366e+00   6.7085445e+00   1.4659394e+00
   2.5051423e+01  -2.6424839e+01   2.0000000e+02  -7.8064814e+00   6.4865563e+00   1.3479277e+00
   2.5122915e+01  -2.6313244e+01   2.0000000e+02  -7.6939831e+00   6.2599238e+00   1.1821969e+00
   2.5188275e+01  -2.6198700e+01   2.0000000e+02  -7.5874299e+00   6.0345525e+00   9.6897578e-01
   2.5247369e+01  -2.6081474e+01   2.0000000e+02  -7.4839862e+00   5.8164575e+00   7.0930029e-01
   2.5300079e+01  -2.5961839e+01   2.0000000e+02  -7.3798197e+00   5.6113997e+00   4.0495496e-01
   2.5346303e+01  -2.5840072e+01   2.0000000e+02  -7.2703369e+00   5.4243900e+00   5.8393188e-02
   2.5385955e+01  -2.5716454e+01   2.0000000e+02  -7.1504478e+00   5.2590775e+00  -3.2730055e-01
   2.5418965e+01  -2.5591271e+01   2.0000000e+02  -7.0149039e+00   5.1170962e+00  -7.4840727e-01
   2.5445279e+01  -2.5464810e+01   2.0000000e+02  -6.8587453e+00   4.9974935e+00  -1.2006064e+00
   2.5464856e+01  -2.5337360e+01   2.0000000e+02  -6.6778451e+00   4.8963795e+00  -1.6791142e+00
   2.5477675e+01  -2.5209213e+01   2.0000000e+02  -6.4694108e+00   4.8068609e+00  -2.1789867e+00
   2.5483728e+01  -2.5080658e+01   2.0000000e+02  -6.2321897e+00   4.7193723e+00  -2.6956841e+00
   2.5483022e+01  -2.4951989e+01   2.0000000e+02  -5.9662083e+00   4.6223286e+00  -3.2255248e+00
   2.5475580e+01  -2.4823495e+01   2.0000000e+02  -5.6719578e+00   4.5030370e+00  -3.7658794e+00
   2.5461440e+01  -2.4695467e+01   2.0000000e+02  -5.3493343e+00   4.3487758e+00  -4.3146799e+00
   2.5440654e+01  -2.4568191e+01   2.0000000e+02  -4.9967327e+00   4.1478788e+00  -4.8693058e+00
   2.5413289e+01  -2.4441952e+01   2.0000000e+02  -4.6108330e+00   3.8907298e+00  -5.4250109e+00
   2.5379424e+01  -2.4317033e+01   2.0000000e+02  -4.1872963e+00   3.5705610e+00  -5.9735201e+00
   2.5339155e+01  -2.4193711e+01   2.0000000e+02  -3.7222954e+00   3.1839656e+00  -6.5023229e+00
   2.5292589e+01  -2.4072260e+01   2.0000000e+02  -3.2144071e+00   2.7311221e+00  -6.9951285e+00
   2.5239846e+01  -2.3952950e+01   2.0000000e+02  -2.6662427e+00   2.2156730e+00  -7.4334591e+00
   2.5181059e+01  -2.3836043e+01   2.0000000e+02  -2.0852160e+00   1.6442749e+00  -7.7990528e+00
   2.5116373e+01  -2.3721796e+01   2.0000000e+02  -1.4831862e+00   1.0259135e+00  -8.0764028e+00
   2.5045945e+01  -2.3610462e+01   2.0000000e+02  -8.7505426e-01   3.7105600e-01  -8.2547658e+00
   2.4969943e+01  -2.3502284e+01   2.0000000e+02  -2.7673047e-01  -3.0925797e-01  -8.3291517e+00
   2.4888547e+01  -2.3397498e+01   2.0000000e+02   2.9686780e-01  -1.0041760e+00  -8.3001560e+00
   2.4801945e+01  -2.3296334e+01   2.0000000e+02   8.3333613e-01  -1.7036165e+00  -8.1728944e+00
   2.4710338e+01  -2.3199011e+01   2.0000000e+02   1.3234961e+00  -2.3986244e+00  -7.9554527e+00
   2.4613934e+01  -2.3105742e+01   2.0000000e+02   1.7613625e+00  -3.0815218e+00  -7.6573612e+00
   2.4512952e+01  -2.3016728e+01   2.0000000e+02   2.1435530e+00  -3.7459490e+00  -7.2883770e+00
   2.4407618e+01  -2.2932162e+01   2.0000000e+02   2.4684963e+00  -4.3868444e+00  -6.8577574e+00
   2.4298167e+01  -2.2852228e+01   2.0000000e+02   2.7357135e+00  -5.0004288e+00  -6.3739538e+00
   2.4184843e+01  -2.2777097e+01   2.0000000e+02   2.9453976e+00  -5.5842178e+00  -5.8445732e+00
   2.4067894e+01  -2.2706932e+01   2.0000000e+02   3.0983745e+00  -6.1370130e+00  -5.2764448e+00
   2.3947577e+01  -2.2641884e+01   2.0000000e+02   3.1963576e+00  -6.6588099e+00  -4.6756305e+00
   2.3824154e+01  -2.2582093e+01   2.0000000e+02   3.2423880e+00  -7.1505962e+00  -4.0473214e+00
   2.3697894e+01  -2.2527687e+01   2.0000000e+02   3.2412269e+00  -7.6139894e+00  -3.3956860e+00
   2.3569070e+01  -2.2478782e+01   2.0000000e+02   3.1995454e+00  -8.0507985e+00  -2.7237534e+00
   2.3437960e+01  -2.2435485e+01   2.0000000e+02   3.1258127e+00  -8.4625991e+00  -2.0334675e+00
   2.3304846e+01  -2.2397887e+01   2.0000000e+02   3.0298654e+00  -8.8504778e+00  -1.3258711e+00
   2.3170014e+01  -2.2366070e+01   2.0000000e+02   2.9223085e+00  -9.2149990e+00  -6.0140177e-01
   2.3033751e+01  -2.2340100e+01   2.0000000e+02   2.8138014e+00  -9.5563658e+00   1.3994063e-01
   2.2896351e+01  -2.2320035e+01   2.0000000e+02   2.7144393e+00  -9.8745786e+00   8.9854390e-01
   2.2758106e+01  -2.2305916e+01   2.0000000e+02   2.6332066e+00  -1.0169448e+01   1.6754178e+00
   2.2619311e+01  -2.2297773e+01   2.0000000e+02   2.5776810e+00  -1.0440248e+01   2.4723544e+00
   2.2480261e+01  -2.2295625e+01   2.0000000e+02   2.5539421e+00  -1.0685074e+01   3.2919213e+00
   2.2341254e+01  -2.2299476e+01   2.0000000e+02   2.5666824e+00  -1.0900045e+01   4.1369786e+00
   2.2202585e+01  -2.2309317e+01   2.0000000e+02   2.6195315e+00  -1.1078676e+01   5.0096972e+00
   2.2064549e+01  -2.2325128e+01   2.0000000e+02   2.7154860e+00  -1.1211726e+01   5.9100599e+00
   2.1927442e+01  -2.2346874e+01   2.0000000e+02   2.8572854e+00  -1.1287793e+01   6.8341844e+00
   2.1791557e+01  -2.2374510e+01   2.0000000e+02   3.0476887e+00  -1.1294713e+01   7.7728969e+00
   2.1657183e+01  -2.2407975e+01   2.0000000e+02   3.2894275e+00  -1.1221610e+01   8.7109641e+00
   2.1524609e+01  -2.2447199e+01   2.0000000e+02   3.5849470e+00  -1.1061174e+01   9.6272854e+00
   2.1394119e+01  -2.2492098e+01   2.0000000e+02   3.9358254e+00  -1.0811671e+01   1.0496277e+01
   2.1265995e+01  -2.2542575e+01   2.0000000e+02   4.3421183e+00  -1.0478127e+01   1.1290125e+01
   2.1140513e+01  -2.2598522e+01   2.0000000e+02   4.8017662e+00  -1.0072382e+01   1.1981554e+01
   2.1017944e+01  -2.2659819e+01   2.0000000e+02   5.3101774e+00  -9.6119733e+00   1.2546442e+01
   2.0898557e+01  -2.2726334e+01   2.0000000e+02   5.8600826e+00  -9.1181789e+00   1.2965777e+01
   2.0782611e+01  -2.2797925e+01   2.0000000e+02   6.4416517e+00  -8.6136681e+00   1.3226734e+01
   2.0670361e+01  -2.2874436e+01   2.0000000e+02   7.0427280e+00  -8.1203827e+00   1.3322796e+01
   2.0562055e+01  -2.2955703e+01   2.0000000e+02   7.6492371e+00  -7.6579318e+00   1.3253281e+01
   2.0457932e+01  -2.3041550e+01   2.0000000e+02   8.2455824e+00  -7.2426464e+00   1.3022667e+01
   2.0358227e+01  -2.3131792e+01   2.0000000e+02   8.8152124e+00  -6.8872165e+00   1.2639937e+01
   2.0263163e+01  -2.3226233e+01   2.0000000e+02   9.3413227e+00  -6.6005835e+00   1.2118164e+01
   2.0172956e+01  -2.3324668e+01   2.0000000e+02   9.8078247e+00  -6.3880077e+00   1.1474100e+01
   2.0087812e+01  -2.3426883e+01   2.0000000e+02   1.0200482e+01  -6.2511007e+00   1.0727656e+01
   2.0007928e+01  -2.3532655e+01   2.0000000e+02   1.0508105e+01  -6.1878985e+00   9.9010225e+00
   1.9933490e+01  -2.3641754e+01   2.0000000e+02   1.0723576e+01  -6.1930478e+00   9.0173305e+00
   1.9864676e+01  -2.3753940e+01   2.0000000e+02   1.0844434e+01  -6.2582308e+00   8.0989797e+00
   1.9801649e+01  -2.3868967e+01   2.0000000e+02   1.0872818e+01  -6.3728555e+00   7.1658041e+00
   1.9744563e+01  -2.3986583e+01   2.0000000e+02   1.0814659e+01  -6.5250252e+00   6.2334983e+00
   1.9693560e+01  -2.4106528e+01   2.0000000e+02   1.0678198e+01  -6.7025859e+00   5.3127420e+00
   1.9648769e+01  -2.4228537e+01   2.0000000e+02   1.0472154e+01  -6.8941267e+00   4.4092165e+00
   1.9610308e+01  -2.4352341e+01   2.0000000e+02   1.0203997e+01  -7.0897441e+00   3.5246302e+00
   1.9578279e+01  -2.4477663e+01   2.0000000e+02   9.8787822e+00  -7.2814376e+00   2.6585818e+00
   1.9552774e+01  -2.4604225e+01   2.0000000e+02   9.4989065e+00  -7.4632172e+00   1.8105510e+00
   1.9533868e+01  -2.4731743e+01   2.0000000e+02   9.0647792e+00  -7.6309117e+00   9.8174722e-01
   1.9521625e+01  -2.4859933e+01   2.0000000e+02   8.5761672e+00  -7.7819266e+00   1.7601517e-01
   1.9516092e+01  -2.4988506e+01   2.0000000e+02   8.0337561e+00  -7.9149920e+00  -6.0011283e-01
   1.9517303e+01  -2.5117173e+01   2.0000000e+02   7.4404234e+00  -8.0300397e+00  -1.3383897e+00
   1.9525276e+01  -2.5245641e+01   2.0000000e+02   6.8019492e+00  -8.1281254e+00  -2.0302954e+00
   1.9540015e+01  -2.5373620e+01   2.0000000e+02   6.1270015e+00  -8.2113412e+00  -2.6687312e+00
   1.9582278e+01  -2.6044625e+01   2.0000000e+02   2.3434379e+00  -8.4009149e+00  -4.2874094e+00
   1.9636798e+01  -2.6163869e+01   2.0000000e+02   1.6997811e+00  -8.4466155e+00  -4.6183498e+00
   1.9697417e+01  -2.6280740e+01   2.0000000e+02   1.0862820e+00  -8.4793079e+00  -4.9429488e+00
   1.9764025e+01  -2.6394989e+01   2.0000000e+02   5.0091221e-01  -8.4901936e+00  -5.2748663e+00
   1.9836497e+01  -2.6506371e+01   2.0000000e+02  -6.1466344e-02  -8.4681998e+00  -5.6237949e+00
   1.9914695e+01  -2.6614647e+01   2.0000000e+02  -6.0755279e-01  -8.4013498e+00  -5.9939359e+00
   1.9998467e+01  -2.6719585e+01   2.0000000e+02  -1.1437553e+00  -8.2784331e+00  -6.3835167e+00
   2.0087649e+01  -2.6820956e+01   2.0000000e+02  -1.6744630e+00  -8.0906127e+00  -6.7855130e+00
   2.0182062e+01  -2.6918543e+01   2.0000000e+02  -2.2009100e+00  -7.8325650e+00  -7.1892864e+00
   2.0281515e+01  -2.7012132e+01   2.0000000e+02  -2.7207503e+00  -7.5028871e+00  -7.5828032e+00
   2.0385805e+01  -2.7101520e+01   2.0000000e+02  -3.2285149e+00  -7.1036368e+00  -7.9547203e+00
   2.0494715e+01  -2.7186511e+01   2.0000000e+02  -3.7166580e+00  -6.6391996e+00  -8.2958599e+00
   2.0608019e+01  -2.7266919e+01   2.0000000e+02  -4.1769796e+00  -6.1147939e+00  -8.5997470e+00
   2.0725477e+01  -2.7342569e+01   2.0000000e+02  -4.6020122e+00  -5.5351490e+00  -8.8620986e+00
   2.0846840e+01  -2.7413292e+01   2.0000000e+02  -4.9861018e+00  -4.9037255e+00  -9.0796808e+00
   2.0971849e+01  -2.7478933e+01   2.0000000e+02  -5.3260373e+00  -4.2227090e+00  -9.2488743e+00
   2.1100234e+01  -2.7539347e+01   2.0000000e+02  -5.6211461e+00  -3.4937322e+00  -9.3646177e+00
   2.1231716e+01  -2.7594400e+01   2.0000000e+02  -5.8730358e+00  -2.7189497e+00  -9.4200499e+00
   2.1366011e+01  -2.7643970e+01   2.0000000e+02  -6.0851687e+00  -1.9020339e+00  -9.4069250e+00
   2.1502822e+01  -2.7687946e+01   2.0000000e+02  -6.2624519e+00  -1.0488385e+00  -9.3165544e+00
   2.1641851e+01  -2.7726231e+01   2.0000000e+02  -6.4109933e+00  -1.6745112e-01  -9.1408908e+00
   2.1782789e+01  -2.7758739e+01   2.0000000e+02  -6.5379404e+00   7.3194149e-01  -8.8733967e+00
   2.1925324e+01  -2.7785398e+01   2.0000000e+02  -6.6513207e+00   1.6373210e+00  -8.5095818e+00
   2.2069141e+01  -2.7806148e+01   2.0000000e+02  -6.7596817e+00   2.5348761e+00  -8.0474034e+00
   2.2213918e+01  -2.7820943e+01   2.0000000e+02  -6.8714462e+00   3.4089068e+00  -7.4878195e+00
   2.2359334e+01  -2.7829750e+01   2.0000000e+02  -6.9940246e+00   4.2420097e+00  -6.8356339e+00
   2.2505064e+01  -2.7832548e+01   2.0000000e+02  -7.1328366e+00   5.0157873e+00  -6.1005473e+00
   2.2650783e+01  -2.7829332e+01   2.0000000e+02  -7.2904842e+00   5.7124125e+00  -5.2978834e+00
   2.2796165e+01  -2.7820109e+01   2.0000000e+02  -7.4662922e+00   6.3167643e+00  -4.4485396e+00
   2.2940886e+01  -2.7804899e+01   2.0000000e+02  -7.6563289e+00   6.8186510e+00  -3.5777373e+00
   2.3084624e+01  -2.7783737e+01   2.0000000e+02  -7.8538971e+00   7.2144010e+00  -2.7126814e+00
   2.3227059e+01  -2.7756669e+01   2.0000000e+02  -8.0504193e+00   7.5073058e+00  -1.8796361e+00
   2.3367874e+01  -2.7723757e+01   2.0000000e+02  -8.2365324e+00   7.7067818e+00  -1.1010495e+00
   2.3506758e+01  -2.7685074e+01   2.0000000e+02  -8.4032468e+00   7.8264825e+00  -3.9349560e-01
   2.3643404e+01  -2.7640706e+01   2.0000000e+02  -8.5429409e+00   7.8819124e+00   2.3320610e-01
   2.3777513e+01  -2.7590751e+01   2.0000000e+02  -8.6500709e+00   7.8881453e+00   7.7569923e-01
   2.3908790e+01  -2.7535322e+01   2.0000000e+02  -8.7215044e+00   7.8580882e+00   1.2358699e+00
   2.4036949e+01  -2.7474540e+01   2.0000000e+02  -8.7565295e+00   7.8015042e+00   1.6191506e+00
   2.4161713e+01  -2.7408541e+01   2.0000000e+02  -8.7565789e+00   7.7247687e+00   1.9328352e+00
   2.4282813e+01  -2.7337470e+01   2.0000000e+02  -8.7248373e+00   7.6312176e+00   2.1845265e+00
   2.4399990e+01  -2.7261485e+01   2.0000000e+02  -8.6657825e+00   7.5218751e+00   2.3810566e+00
   2.4512996e+01  -2.7180752e+01   2.0000000e+02  -8.5847403e+00   7.3963746e+00   2.5277628e+00
   2.4621593e+01  -2.7095449e+01   2.0000000e+02  -8.4874522e+00   7.2538858e+00   2.6282248e+00
   2.4725553e+01  -2.7005763e+01   2.0000000e+02  -8.3796648e+00   7.0939075e+00   2.6843097e+00
   2.4824663e+01  -2.6911889e+01   2.0000000e+02  -8.2667267e+00   6.9167930e+00   2.6965321e+00
   2.4918718e+01  -2.6814033e+01   2.0000000e+02  -8.1532272e+00   6.7239982e+00   2.6645241e+00
   2.5007530e+01  -2.6712406e+01   2.0000000e+02  -8.0426704e+00   6.5180204e+00   2.5875872e+00
   2.5090920e+01  -2.6607230e+01   2.0000000e+02  -7.9372500e+00   6.3022027e+00   2.4651576e+00
   2.5168725e+01  -2.6498730e+01   2.0000000e+02  -7.8377153e+00   6.0804649e+00   2.2971638e+00
   2.5240794e+01  -2.6387141e+01   2.0000000e+02  -7.7433855e+00   5.8571195e+00   2.0842824e+00
   2.5306989e+01  -2.6272702e+01   2.0000000e+02  -7.6522985e+00   5.6367612e+00   1.8280432e+00
   2.5367188e+01  -2.6155658e+01   2.0000000e+02  -7.5614927e+00   5.4241648e+00   1.5308794e+00
   2.5421281e+01  -2.6036259e+01   2.0000000e+02  -7.4673666e+00   5.2241360e+00   1.1960300e+00
   2.5469171e+01  -2.5914758e+01   2.0000000e+02  -7.3660436e+00   5.0411926e+00   8.2736388e-01
   2.5510778e+01  -2.5791412e+01   2.0000000e+02  -7.2536917e+00   4.8790786e+00   4.2916379e-01
   2.5546034e+01  -2.5666483e+01   2.0000000e+02  -7.1267837e+00   4.7402054e+00   5.8659545e-03
   2.5574885e+01  -2.5540232e+01   2.0000000e+02  -6.9823324e+00   4.6250748e+00  -4.3818571e-01
   2.5597291e+01  -2.5412926e+01   2.0000000e+02  -6.8181568e+00   4.5318325e+00  -8.9894116e-01
   2.5613226e+01  -2.5284830e+01   2.0000000e+02  -6.6331167e+00   4.4560410e+00  -1.3729730e+00
   2.5622677e+01  -2.5156210e+01   2.0000000e+02  -6.4272040e+00   4.3907321e+00  -1.8578516e+00
   2.5625646e+01  -2.5027335e+01   2.0000000e+02  -6.2012907e+00   4.3267354e+00  -2.3525115e+00
   2.5622147e+01  -2.4898470e+01   2.0000000e+02  -5.9564052e+00   4.2532645e+00  -2.8574275e+00
   2.5612207e+01  -2.4769883e+01   2.0000000e+02  -5.6926882e+00   4.1586792e+00  -3.3741923e+00
   2.5595867e+01  -2.4641837e+01   2.0000000e+02  -5.4083298e+00   4.0313420e+00  -3.9044541e+00
   2.5573179e+01  -2.4514596e+01   2.0000000e+02  -5.0990212e+00   3.8605139e+00  -4.4482332e+00
   2.5544210e+01  -2.4388419e+01   2.0000000e+02  -4.7582740e+00   3.6371687e+00  -5.0020943e+00
   2.5509036e+01  -2.4263564e+01   2.0000000e+02  -4.3787290e+00   3.3547134e+00  -5.5577721e+00
   2.5467747e+01  -2.4140284e+01   2.0000000e+02  -3.9541734e+00   3.0094894e+00  -6.1017799e+00
   2.5420444e+01  -2.4018831e+01   2.0000000e+02  -3.4817013e+00   2.6010554e+00  -6.6163120e+00
   2.5367238e+01  -2.3899449e+01   2.0000000e+02  -2.9633185e+00   2.1321393e+00  -7.0813327e+00
   2.5308254e+01  -2.3782379e+01   2.0000000e+02  -2.4065461e+00   1.6083278e+00  -7.4772818e+00
   2.5243625e+01  -2.3667857e+01   2.0000000e+02  -1.8237316e+00   1.0374650e+00  -7.7877996e+00
   2.5173494e+01  -2.3556112e+01   2.0000000e+02  -1.2303521e+00   4.2888237e-01  -8.0016983e+00
   2.5098015e+01  -2.3447369e+01   2.0000000e+02  -6.4281442e-01  -2.0738368e-01  -8.1137995e+00
   2.5017352e+01  -2.3341845e+01   2.0000000e+02  -7.6332323e-02  -8.6130924e-01  -8.1246028e+00
   2.4931676e+01  -2.3239751e+01   2.0000000e+02   4.5657690e-01  -1.5233975e+00  -8.0390710e+00
   2.4841169e+01  -2.3141288e+01   2.0000000e+02   9.4673849e-01  -2.1849869e+00  -7.8650060e+00
   2.4746020e+01  -2.3046654e+01   2.0000000e+02   1.3881812e+00  -2.8383667e+00  -7.6115281e+00
   2.4646427e+01  -2.2956035e+01   2.0000000e+02   1.7774639e+00  -3.4768444e+00  -7.2879185e+00
   2.4542595e+01  -2.2869611e+01   2.0000000e+02   2.1127823e+00  -4.0947575e+00  -6.9030009e+00
   2.4434735e+01  -2.2787553e+01   2.0000000e+02   2.3931810e+00  -4.6875649e+00  -6.4649460e+00
   2.4323068e+01  -2.2710022e+01   2.0000000e+02   2.6180558e+00  -5.2519752e+00  -5.9813552e+00
   2.4207817e+01  -2.2637172e+01   2.0000000e+02   2.7870858e+00  -5.7861338e+00  -5.4593787e+00
   2.4089216e+01  -2.2569145e+01   2.0000000e+02   2.9004873e+00  -6.2897166e+00  -4.9057149e+00
   2.3967500e+01  -2.2506075e+01   2.0000000e+02   2.9595363e+00  -6.7639095e+00  -4.3263778e+00
   2.3842912e+01  -2.2448087e+01   2.0000000e+02   2.9670861e+00  -7.2111081e+00  -3.7263290e+00
   2.3715699e+01  -2.2395293e+01   2.0000000e+02   2.9279305e+00  -7.6344124e+00  -3.1090624e+00
   2.3586111e+01  -2.2347797e+01   2.0000000e+02   2.8488794e+00  -8.0369613e+00  -2.4764028e+00
   2.3454405e+01  -2.2305692e+01   2.0000000e+02   2.7384983e+00  -8.4212960e+00  -1.8286086e+00
   2.3320837e+01  -2.2269060e+01   2.0000000e+02   2.6065996e+00  -8.7889785e+00  -1.1647254e+00
   2.3185671e+01  -2.2237973e+01   2.0000000e+02   2.4636002e+00  -9.1404830e+00  -4.8314480e-01
   2.3049170e+01  -2.2212492e+01   2.0000000e+02   2.3198590e+00  -9.4754137e+00   2.1800245e-01
   2.2911600e+01  -2.2192666e+01   2.0000000e+02   2.1850896e+00  -9.7927810e+00   9.4063927e-01
   2.2773229e+01  -2.2178534e+01   2.0000000e+02   2.0679141e+00  -1.0091161e+01   1.6868109e+00
   2.2634327e+01  -2.2170124e+01   2.0000000e+02   1.9755699e+00  -1.0368556e+01   2.4588663e+00
   2.2495164e+01  -2.2167452e+01   2.0000000e+02   1.9138020e+00  -1.0621938e+01   3.2595272e+00
   2.2356011e+01  -2.2170523e+01   2.0000000e+02   1.8869642e+00  -1.0846606e+01   4.0915903e+00
   2.2217137e+01  -2.2179331e+01   2.0000000e+02   1.8982965e+00  -1.1035624e+01   4.9571794e+00
   2.2078813e+01  -2.2193860e+01   2.0000000e+02   1.9503371e+00  -1.1179618e+01   5.8565137e+00
   2.1941309e+01  -2.2214080e+01   2.0000000e+02   2.0453320e+00  -1.1267216e+01   6.7864827e+00
   2.1804892e+01  -2.2239952e+01   2.0000000e+02   2.1856063e+00  -1.1286192e+01   7.7393237e+00
   2.1669828e+01  -2.2271426e+01   2.0000000e+02   2.3736982e+00  -1.1225242e+01   8.7017673e+00
   2.1536382e+01  -2.2308441e+01   2.0000000e+02   2.6122391e+00  -1.1076073e+01   9.6550170e+00
   2.1404814e+01  -2.2350923e+01   2.0000000e+02   2.9035585e+00  -1.0835363e+01   1.0575741e+01
   2.1275383e+01  -2.2398790e+01   2.0000000e+02   3.2491627e+00  -1.0506104e+01   1.1437893e+01
   2.1148344e+01  -2.2451949e+01   2.0000000e+02   3.6491165e+00  -1.0097970e+01   1.2215139e+01
   2.1023948e+01  -2.2510294e+01   2.0000000e+02   4.1015262e+00  -9.6265903e+00   1.2883308e+01
   2.0902441e+01  -2.2573713e+01   2.0000000e+02   4.6022877e+00  -9.1119080e+00   1.3422383e+01
   2.0784065e+01  -2.2642079e+01   2.0000000e+02   5.1449233e+00  -8.5760481e+00   1.3817692e+01
   2.0669056e+01  -2.2715259e+01   2.0000000e+02   5.7207291e+00  -8.0411733e+00   1.4060221e+01
   2.0557645e+01  -2.2793110e+01   2.0000000e+02   6.3189127e+00  -7.5277630e+00   1.4146258e+01
   2.0450059e+01  -2.2875477e+01   2.0000000e+02   6.9267933e+00  -7.0535049e+00   1.4076714e+01
   2.0346514e+01  -2.2962198e+01   2.0000000e+02   7.5301164e+00  -6.6327411e+00   1.3856477e+01
   2.0247223e+01  -2.3053101e+01   2.0000000e+02   8.1134414e+00  -6.2763914e+00   1.3493962e+01
   2.0152390e+01  -2.3148008e+01   2.0000000e+02   8.6607911e+00  -5.9919918e+00   1.3000904e+01
   2.0062213e+01  -2.3246729e+01   2.0000000e+02   9.1564909e+00  -5.7837726e+00   1.2392258e+01
   1.9976880e+01  -2.3349068e+01   2.0000000e+02   9.5863040e+00  -5.6526775e+00   1.1685860e+01
   1.9896571e+01  -2.3454823e+01   2.0000000e+02   9.9386007e+00  -5.5964154e+00   1.0901738e+01
   1.9821459e+01  -2.3563781e+01   2.0000000e+02   1.0205378e+01  -5.6096107e+00   1.0061036e+01
   1.9751705e+01  -2.3675726e+01   2.0000000e+02   1.0382959e+01  -5.6841840e+00   9.1844474e+00
   1.9687464e+01  -2.3790433e+01   2.0000000e+02   1.0472083e+01  -5.8099999e+00   8.2905960e+00
   1.9628877e+01  -2.3907671e+01   2.0000000e+02   1.0477305e+01  -5.9757044e+00   7.3945246e+00
   1.9576078e+01  -2.4027205e+01   2.0000000e+02   1.0405781e+01  -6.1697091e+00   6.5066698e+00
   1.9529189e+01  -2.4148793e+01   2.0000000e+02   1.0265578e+01  -6.3810545e+00   5.6327129e+00
   1.9488322e+01  -2.4272190e+01   2.0000000e+02   1.0063970e+01  -6.6000986e+00   4.7742620e+00
   1.9453576e+01  -2.4397145e+01   2.0000000e+02   9.8060992e+00  -6.8188585e+00   3.9304081e+00
   1.9425041e+01  -2.4523405e+01   2.0000000e+02   9.4944043e+00  -7.0310745e+00   3.0996187e+00
   1.9402792e+01  -2.4650711e+01   2.0000000e+02   9.1289333e+00  -7.2319993e+00   2.2816654e+00
   1.9386895e+01  -2.4778802e+01   2.0000000e+02   8.7084284e+00  -7.4181484e+00   1.4788673e+00
   1.9377401e+01  -2.4907418e+01   2.0000000e+02   8.2317848e+00  -7.5870660e+00   6.9654498e-01
   1.9374351e+01  -2.5036291e+01   2.0000000e+02   7.6995285e+00  -7.7372355e+00  -5.7398853e-02
   1.9377770e+01  -2.5165157e+01   2.0000000e+02   7.1147947e+00  -7.8681369e+00  -7.7365599e-01
   1.9387672e+01  -2.5293749e+01   2.0000000e+02   6.4837962e+00  -7.9803604e+00  -1.4429692e+00
   1.9404057e+01  -2.5421799e+01   2.0000000e+02   5.8156755e+00  -8.0756555e+00  -2.0576310e+00
   1.9426911e+01  -2.5549041e+01   2.0000000e+02   5.1218950e+00  -8.1567983e+00  -2.6128124e+00
   1.9456209e+01  -2.5675208e+01   2.0000000e+02   4.4153327e+00  -8.2271845e+00  -3.1075831e+00
   1.9491908e+01  -2.5800036e+01   2.0000000e+02   3.7091022e+00  -8.2901227e+00  -3.5454996e+00
   1.9533954e+01  -2.5923262e+01   2.0000000e+02   3.0152532e+00  -8.3479240e+00  -3.9347245e+00
   1.9714474e+01  -2.6573850e+01   2.0000000e+02  -2.8547489e-01  -8.3656822e+00  -4.7288961e+00
   1.9792084e+01  -2.6681696e+01   2.0000000e+02  -7.9205784e-01  -8.3252601e+00  -5.0672894e+00
   1.9874991e+01  -2.6786394e+01   2.0000000e+02  -1.2883982e+00  -8.2359738e+00  -5.4313761e+00
   1.9963048e+01  -2.6887738e+01   2.0000000e+02  -1.7804800e+00  -8.0891791e+00  -5.8156585e+00
   2.0056096e+01  -2.6985528e+01   2.0000000e+02  -2.2713529e+00  -7.8792887e+00  -6.2106883e+00
   2.0153966e+01  -2.7079572e+01   2.0000000e+02  -2.7605180e+00  -7.6042970e+00  -6.6050837e+00
   2.0256476e+01  -2.7169685e+01   2.0000000e+02  -3.2440397e+00  -7.2655322e+00  -6.9876042e+00
   2.0363436e+01  -2.7255686e+01   2.0000000e+02  -3.7153148e+00  -6.8666900e+00  -7.3488553e+00
   2.0474643e+01  -2.7337406e+01   2.0000000e+02  -4.1662907e+00  -6.4124175e+00  -7.6820767e+00
   2.0589885e+01  -2.7414681e+01   2.0000000e+02  -4.5887882e+00  -5.9068858e+00  -7.9830510e+00
   2.0708943e+01  -2.7487358e+01   2.0000000e+02  -4.9757159e+00  -5.3527489e+00  -8.2491006e+00
   2.0831584e+01  -2.7555290e+01   2.0000000e+02  -5.3218729e+00  -4.7508842e+00  -8.4776169e+00
   2.0957571e+01  -2.7618341e+01   2.0000000e+02  -5.6243469e+00  -4.1008506e+00  -8.6646883e+00
   2.1086657e+01  -2.7676384e+01   2.0000000e+02  -5.8824508e+00  -3.4020039e+00  -8.8042256e+00
   2.1218587e+01  -2.7729303e+01   2.0000000e+02  -6.0974245e+00  -2.6547520e+00  -8.8879179e+00
   2.1353099e+01  -2.7776990e+01   2.0000000e+02  -6.2720786e+00  -1.8615566e+00  -8.9059493e+00
   2.1489926e+01  -2.7819350e+01   2.0000000e+02  -6.4105707e+00  -1.0273884e+00  -8.8480907e+00
   2.1628795e+01  -2.7856296e+01   2.0000000e+02  -6.5183358e+00  -1.5969532e-01  -8.7047922e+00
   2.1769425e+01  -2.7887753e+01   2.0000000e+02  -6.6021186e+00   7.3186986e-01  -8.4679174e+00
   2.1911535e+01  -2.7913657e+01   2.0000000e+02  -6.6699136e+00   1.6356805e+00  -8.1311449e+00
   2.2054838e+01  -2.7933957e+01   2.0000000e+02  -6.7306378e+00   2.5379982e+00  -7.6902979e+00
   2.2199043e+01  -2.7948610e+01   2.0000000e+02  -6.7934593e+00   3.4227239e+00  -7.1439835e+00
   2.2343859e+01  -2.7957588e+01   2.0000000e+02  -6.8668436e+00   4.2714089e+00  -6.4946400e+00
   2.2488992e+01  -2.7960870e+01   2.0000000e+02  -6.9575032e+00   5.0639167e+00  -5.7499254e+00
   2.2634147e+01  -2.7958452e+01   2.0000000e+02  -7.0694927e+00   5.7800578e+00  -4.9237870e+00
   2.2779029e+01  -2.7950337e+01   2.0000000e+02  -7.2036853e+00   6.4019481e+00  -4.0367241e+00
   2.2923346e+01  -2.7936543e+01   2.0000000e+02  -7.3577036e+00   6.9165594e+00  -3.1147039e+00
   2.3066804e+01  -2.7917097e+01   2.0000000e+02  -7.5263156e+00   7.3176725e+00  -2.1869229e+00
   2.3209114e+01  -2.7892039e+01   2.0000000e+02  -7.7021762e+00   7.6067450e+00  -1.2826565e+00
   2.3349987e+01  -2.7861420e+01   2.0000000e+02  -7.8767812e+00   7.7923591e+00  -4.2812766e-01
   2.3489141e+01  -2.7825302e+01   2.0000000e+02  -8.0414952e+00   7.8885046e+00   3.5607543e-01
   2.3626295e+01  -2.7783759e+01   2.0000000e+02  -8.1884908e+00   7.9121303e+00   1.0563612e+00
   2.3761176e+01  -2.7736873e+01   2.0000000e+02  -8.3115077e+00   7.8806118e+00   1.6662804e+00
   2.3893514e+01  -2.7684741e+01   2.0000000e+02  -8.4062864e+00   7.8096373e+00   2.1855765e+00
   2.4023048e+01  -2.7627467e+01   2.0000000e+02  -8.4707308e+00   7.7118273e+00   2.6185491e+00
   2.4149521e+01  -2.7565168e+01   2.0000000e+02  -8.5047671e+00   7.5961603e+00   2.9722180e+00
   2.4272685e+01  -2.7497967e+01   2.0000000e+02  -8.5100494e+00   7.4680890e+00   3.2546158e+00
   2.4392301e+01  -2.7426001e+01   2.0000000e+02  -8.4895475e+00   7.3301367e+00   3.4735180e+00
   2.4508136e+01  -2.7349414e+01   2.0000000e+02  -8.4471603e+00   7.1827905e+00   3.6355097e+00
   2.4619969e+01  -2.7268357e+01   2.0000000e+02  -8.3873311e+00   7.0254505e+00   3.7455990e+00
   2.4727586e+01  -2.7182994e+01   2.0000000e+02  -8.3147162e+00   6.8573056e+00   3.8071816e+00
   2.4830783e+01  -2.7093494e+01   2.0000000e+02  -8.2338998e+00   6.6780055e+00   3.8222361e+00
   2.4929369e+01  -2.7000034e+01   2.0000000e+02  -8.1491178e+00   6.4880214e+00   3.7917544e+00
   2.5023159e+01  -2.6902800e+01   2.0000000e+02  -8.0640139e+00   6.2887406e+00   3.7161513e+00
   2.5111984e+01  -2.6801982e+01   2.0000000e+02  -7.9813784e+00   6.0822735e+00   3.5956873e+00
   2.5195681e+01  -2.6697780e+01   2.0000000e+02  -7.9029227e+00   5.8712015e+00   3.4307634e+00
   2.5274103e+01  -2.6590398e+01   2.0000000e+02  -7.8290786e+00   5.6583019e+00   3.2221716e+00
   2.5347112e+01  -2.6480045e+01   2.0000000e+02  -7.7589176e+00   5.4464521e+00   2.9712649e+00
   2.5414581e+01  -2.6366936e+01   2.0000000e+02  -7.6902269e+00   5.2386432e+00   2.6801605e+00
   2.5476398e+01  -2.6251292e+01   2.0000000e+02  -7.6197869e+00   5.0380518e+00   2.3519048e+00
   2.5532459e+01  -2.6133336e+01   2.0000000e+02  -7.5438173e+00   4.8481038e+00   1.9904821e+00
   2.5582675e+01  -2.6013296e+01   2.0000000e+02  -7.4584956e+00   4.6723384e+00   1.6007406e+00
   2.5626968e+01  -2.5891402e+01   2.0000000e+02  -7.3604269e+00   4.5141321e+00   1.1880720e+00
   2.5665272e+01  -2.5767889e+01   2.0000000e+02  -7.2469794e+00   4.3762555e+00   7.5800929e-01
   2.5697533e+01  -2.5642992e+01   2.0000000e+02  -7.1164595e+00   4.2603709e+00   3.1575077e-01
   2.5723708e+01  -2.5516949e+01   2.0000000e+02  -6.9681876e+00   4.1665720e+00  -1.3424583e-01
   2.5743768e+01  -2.5390000e+01   2.0000000e+02  -6.8025201e+00   4.0930368e+00  -5.8862839e-01
   2.5757695e+01  -2.5262384e+01   2.0000000e+02  -6.6208001e+00   4.0358787e+00  -1.0455193e+00
   2.5765480e+01  -2.5134343e+01   2.0000000e+02  -6.4251386e+00   3.9891926e+00  -1.5048397e+00
   2.5767130e+01  -2.5006116e+01   2.0000000e+02  -6.2178636e+00   3.9452622e+00  -1.9685273e+00
   2.5762661e+01  -2.4877945e+01   2.0000000e+02  -6.0006160e+00   3.8949711e+00  -2.4403989e+00
   2.5752099e+01  -2.4750069e+01   2.0000000e+02  -5.7732162e+00   3.8283150e+00  -2.9254550e+00
   2.5735483e+01  -2.4622726e+01   2.0000000e+02  -5.5327021e+00   3.7350030e+00  -3.4284646e+00
   2.5712863e+01  -2.4496152e+01   2.0000000e+02  -5.2729653e+00   3.6051303e+00  -3.9520691e+00
   2.5684298e+01  -2.4370582e+01   2.0000000e+02  -4.9853229e+00   3.4298727e+00  -4.4948266e+00
   2.5649858e+01  -2.4246248e+01   2.0000000e+02  -4.6600578e+00   3.2021450e+00  -5.0497905e+00
   2.5609623e+01  -2.4123378e+01   2.0000000e+02  -4.2886183e+00   2.9171759e+00  -5.6041534e+00
   2.5563683e+01  -2.4002198e+01   2.0000000e+02  -3.8659167e+00   2.5729225e+00  -6.1401810e+00
   2.5512139e+01  -2.3882929e+01   2.0000000e+02  -3.3920658e+00   2.1702307e+00  -6.6373310e+00
   2.5455099e+01  -2.3765790e+01   2.0000000e+02  -2.8730571e+00   1.7127185e+00  -7.0750587e+00
   2.5392680e+01  -2.3650995e+01   2.0000000e+02  -2.3201860e+00   1.2063529e+00  -7.4356190e+00
   2.5325011e+01  -2.3538751e+01   2.0000000e+02  -1.7484116e+00   6.5882200e-01  -7.7061911e+00
   2.5252227e+01  -2.3429262e+01   2.0000000e+02  -1.1741165e+00   7.8829336e-02  -7.8799100e+00
   2.5174470e+01  -2.3322726e+01   2.0000000e+02  -6.1289260e-01  -5.2458528e-01  -7.9556945e+00
   2.5091893e+01  -2.3219335e+01   2.0000000e+02  -7.7895638e-02  -1.1425484e+00  -7.9371346e+00
   2.5004655e+01  -2.3119276e+01   2.0000000e+02   4.2100416e-01  -1.7666754e+00  -7.8309214e+00
   2.4912921e+01  -2.3022729e+01   2.0000000e+02   8.7722905e-01  -2.3892227e+00  -7.6452683e+00
   2.4816865e+01  -2.2929866e+01   2.0000000e+02   1.2868694e+00  -3.0031192e+00  -7.3886963e+00
   2.4716668e+01  -2.2840855e+01   2.0000000e+02   1.6477706e+00  -3.6019791e+00  -7.0693578e+00
   2.4612515e+01  -2.2755854e+01   2.0000000e+02   1.9586406e+00  -4.1802099e+00  -6.6948333e+00
   2.4504600e+01  -2.2675015e+01   2.0000000e+02   2.2183685e+00  -4.7331635e+00  -6.2723009e+00
   2.4393119e+01  -2.2598482e+01   2.0000000e+02   2.4257597e+00  -5.2574426e+00  -5.8087935e+00
   2.4278276e+01  -2.2526391e+01   2.0000000e+02   2.5796358e+00  -5.7511988e+00  -5.3113736e+00
   2.4160281e+01  -2.2458871e+01   2.0000000e+02   2.6792785e+00  -6.2143870e+00  -4.7870309e+00
   2.4039345e+01  -2.2396042e+01   2.0000000e+02   2.7250334e+00  -6.6488317e+00  -4.2422463e+00
   2.3915687e+01  -2.2338014e+01   2.0000000e+02   2.7188646e+00  -7.0579433e+00  -3.6823798e+00
   2.3789528e+01  -2.2284891e+01   2.0000000e+02   2.6647308e+00  -7.4461418e+00  -3.1110339e+00
   2.3661093e+01  -2.2236767e+01   2.0000000e+02   2.5686324e+00  -7.8180311e+00  -2.5296601e+00
   2.3530612e+01  -2.2193726e+01   2.0000000e+02   2.4383573e+00  -8.1775440e+00  -1.9375870e+00
   2.3398314e+01  -2.2155846e+01   2.0000000e+02   2.2830055e+00  -8.5273151e+00  -1.3324467e+00
   2.3264435e+01  -2.2123192e+01   2.0000000e+02   2.1123797e+00  -8.8683820e+00  -7.1089272e-01
   2.3129212e+01  -2.2095823e+01   2.0000000e+02   1.9364095e+00  -9.2003141e+00  -6.9288968e-02
   2.2992881e+01  -2.2073786e+01   2.0000000e+02   1.7646042e+00  -9.5215649e+00   5.9583421e-01
   2.2855685e+01  -2.2057121e+01   2.0000000e+02   1.6056450e+00  -9.8298215e+00   1.2875843e+00
   2.2717864e+01  -2.2045857e+01   2.0000000e+02   1.4670448e+00  -1.0122194e+01   2.0088566e+00
   2.2579660e+01  -2.2040014e+01   2.0000000e+02   1.3549662e+00  -1.0395067e+01   2.7624716e+00
   2.2441316e+01  -2.2039602e+01   2.0000000e+02   1.2741740e+00  -1.0643702e+01   3.5511785e+00
   2.2303075e+01  -2.2044622e+01   2.0000000e+02   1.2281639e+00  -1.0861737e+01   4.3773174e+00
   2.2165180e+01  -2.2055065e+01   2.0000000e+02   1.2194379e+00  -1.1040822e+01   5.2420710e+00
   2.2027873e+01  -2.2070913e+01   2.0000000e+02   1.2498944e+00  -1.1170647e+01   6.1443939e+00
   2.1891396e+01  -2.2092137e+01   2.0000000e+02   1.3212266e+00  -1.1239534e+01   7.0798070e+00
   2.1755989e+01  -2.2118700e+01   2.0000000e+02   1.4352676e+00  -1.1235631e+01   8.0393972e+00
   2.1621891e+01  -2.2150556e+01   2.0000000e+02   1.5941444e+00  -1.1148588e+01   9.0092899e+00
   2.1489339e+01  -2.2187648e+01   2.0000000e+02   1.8001998e+00  -1.0971406e+01   9.9708717e+00
   2.1358566e+01  -2.2229911e+01   2.0000000e+02   2.0557205e+00  -1.0702082e+01   1.0901848e+01
   2.1229806e+01  -2.2277270e+01   2.0000000e+02   2.3624775e+00  -1.0344649e+01   1.1777953e+01
   2.1103288e+01  -2.2329641e+01   2.0000000e+02   2.7212291e+00  -9.9093174e+00   1.2575125e+01
   2.0979236e+01  -2.2386931e+01   2.0000000e+02   3.1312781e+00  -9.4116713e+00   1.3271594e+01
   2.0857874e+01  -2.2449039e+01   2.0000000e+02   3.5901771e+00  -8.8711247e+00   1.3849475e+01
   2.0739418e+01  -2.2515856e+01   2.0000000e+02   4.0935862e+00  -8.3089348e+00   1.4295706e+01
   2.0624084e+01  -2.2587261e+01   2.0000000e+02   4.6352277e+00  -7.7463151e+00   1.4602139e+01
   2.0512081e+01  -2.2663129e+01   2.0000000e+02   5.2069993e+00  -7.2028684e+00   1.4765106e+01
   2.0403611e+01  -2.2743324e+01   2.0000000e+02   5.7989859e+00  -6.6956045e+00   1.4784696e+01
   2.0298876e+01  -2.2827704e+01   2.0000000e+02   6.3995984e+00  -6.2385418e+00   1.4664055e+01
   2.0198066e+01  -2.2916117e+01   2.0000000e+02   6.9957103e+00  -5.8425813e+00   1.4409031e+01
   2.0101371e+01  -2.3008406e+01   2.0000000e+02   7.5730654e+00  -5.5156819e+00   1.4028017e+01
   2.0008971e+01  -2.3104406e+01   2.0000000e+02   8.1168482e+00  -5.2629135e+00   1.3532053e+01
   1.9921040e+01  -2.3203944e+01   2.0000000e+02   8.6125547e+00  -5.0865109e+00   1.2934847e+01
   1.9837745e+01  -2.3306841e+01   2.0000000e+02   9.0470562e+00  -4.9858621e+00   1.2252533e+01
   1.9759248e+01  -2.3412912e+01   2.0000000e+02   9.4096862e+00  -4.9575562e+00   1.1503038e+01
   1.9685700e+01  -2.3521966e+01   2.0000000e+02   9.6931489e+00  -4.9955517e+00   1.0705058e+01
   1.9617246e+01  -2.3633805e+01   2.0000000e+02   9.8940902e+00  -5.0916076e+00   9.8767144e+00
   1.9554023e+01  -2.3748227e+01   2.0000000e+02   1.0013150e+01  -5.2359175e+00   9.0340927e+00
   1.9496160e+01  -2.3865024e+01   2.0000000e+02   1.0054396e+01  -5.4178926e+00   8.1899856e+00
   1.9443775e+01  -2.3983984e+01   2.0000000e+02   1.0024208e+01  -5.6269793e+00   7.3530641e+00
   1.9396979e+01  -2.4104888e+01   2.0000000e+02   9.9297974e+00  -5.8533802e+00   6.5277491e+00
   1.9355873e+01  -2.4227516e+01   2.0000000e+02   9.7776597e+00  -6.0885557e+00   5.7148020e+00
   1.9320549e+01  -2.4351643e+01   2.0000000e+02   9.5723374e+00  -6.3254214e+00   4.9126718e+00
   1.9291088e+01  -2.4477041e+01   2.0000000e+02   9.3158097e+00  -6.5582848e+00   4.1192040e+00
   1.9267562e+01  -2.4603478e+01   2.0000000e+02   9.0076730e+00  -6.7826084e+00   3.3333455e+00
   1.9250032e+01  -2.4730719e+01   2.0000000e+02   8.6460156e+00  -6.9947189e+00   2.5564295e+00
   1.9238550e+01  -2.4858530e+01   2.0000000e+02   8.2287165e+00  -7.1916130e+00   1.7927150e+00
   1.9233154e+01  -2.4986671e+01   2.0000000e+02   7.7548178e+00  -7.3708820e+00   1.0492671e+00
   1.9233875e+01  -2.5114905e+01   2.0000000e+02   7.2255870e+00  -7.5308631e+00   3.3503390e-01
   1.9240730e+01  -2.5242990e+01   2.0000000e+02   6.6451454e+00  -7.6708271e+00  -3.4025782e-01
   1.9253725e+01  -2.5370685e+01   2.0000000e+02   6.0205697e+00  -7.7912095e+00  -9.6745593e-01
   1.9272856e+01  -2.5497751e+01   2.0000000e+02   5.3615984e+00  -7.8937018e+00  -1.5392230e+00
   1.9298106e+01  -2.5623947e+01   2.0000000e+02   4.6800617e+00  -7.9811175e+00  -2.0510923e+00
   1.9329446e+01  -2.5749033e+01   2.0000000e+02   3.9890276e+00  -8.0569980e+00  -2.5023874e+00
   1.9366837e+01  -2.5872771e+01   2.0000000e+02   3.3017189e+00  -8.1249463e+00  -2.8968426e+00
   1.9410225e+01  -2.5994925e+01   2.0000000e+02   2.6302415e+00  -8.1877471e+00  -3.2427172e+00
   1.9459548e+01  -2.6115262e+01   2.0000000e+02   1.9842536e+00  -8.2464438e+00  -3.5523294e+00
   1.9514729e+01  -2.6233549e+01   2.0000000e+02   1.3698468e+00  -8.2995240e+00  -3.8407558e+00
   1.9575679e+01  -2.6349558e+01   2.0000000e+02   7.8886831e-01  -8.3424627e+00  -4.1239259e+00
   1.9642298e+01  -2.6463065e+01   2.0000000e+02   2.3898607e-01  -8.3677785e+00  -4.4163422e+00
   1.9948419e+01  -2.7071110e+01   2.0000000e+02  -2.3896001e+00  -7.8008772e+00  -5.3022761e+00
   2.0046386e+01  -2.7165472e+01   2.0000000e+02  -2.8538581e+00  -7.5633523e+00  -5.6973454e+00
   2.0148837e+01  -2.7256058e+01   2.0000000e+02  -3.3183435e+00  -7.2676004e+00  -6.0861481e+00
   2.0255598e+01  -2.7342702e+01   2.0000000e+02  -3.7768712e+00  -6.9173160e+00  -6.4591675e+00
   2.0366482e+01  -2.7425244e+01   2.0000000e+02  -4.2212885e+00  -6.5170890e+00  -6.8097135e+00
   2.0481296e+01  -2.7503533e+01   2.0000000e+02  -4.6428117e+00  -6.0708696e+00  -7.1340039e+00
   2.0599836e+01  -2.7577424e+01   2.0000000e+02  -5.0332620e+00  -5.5807998e+00  -7.4302497e+00
   2.0721891e+01  -2.7646780e+01   2.0000000e+02  -5.3860307e+00  -5.0467126e+00  -7.6971407e+00
   2.0847241e+01  -2.7711473e+01   2.0000000e+02  -5.6965880e+00  -4.4665029e+00  -7.9321755e+00
   2.0975661e+01  -2.7771382e+01   2.0000000e+02  -5.9625489e+00  -3.8372047e+00  -8.1304528e+00
   2.1106917e+01  -2.7826395e+01   2.0000000e+02  -6.1834269e+00  -3.1564370e+00  -8.2842243e+00
   2.1240769e+01  -2.7876411e+01   2.0000000e+02  -6.3603018e+00  -2.4236860e+00  -8.3833563e+00
   2.1376971e+01  -2.7921334e+01   2.0000000e+02  -6.4955824e+00  -1.6410844e+00  -8.4164209e+00
   2.1515271e+01  -2.7961082e+01   2.0000000e+02  -6.5930112e+00  -8.1355393e-01  -8.3718725e+00
   2.1655413e+01  -2.7995579e+01   2.0000000e+02  -6.6578117e+00   5.1471748e-02  -8.2390010e+00
   2.1797138e+01  -2.8024762e+01   2.0000000e+02  -6.6968547e+00   9.4435064e-01  -8.0083782e+00
   2.1940180e+01  -2.8048574e+01   2.0000000e+02  -6.7185924e+00   1.8531809e+00  -7.6721077e+00
   2.2084271e+01  -2.8066971e+01   2.0000000e+02  -6.7326348e+00   2.7634319e+00  -7.2241991e+00
   2.2229144e+01  -2.8079920e+01   2.0000000e+02  -6.7489205e+00   3.6574956e+00  -6.6615083e+00
   2.2374524e+01  -2.8087394e+01   2.0000000e+02  -6.7766306e+00   4.5146423e+00  -5.9853372e+00
   2.2520141e+01  -2.8089380e+01   2.0000000e+02  -6.8230771e+00   5.3120884e+00  -5.2031394e+00
   2.2665719e+01  -2.8085875e+01   2.0000000e+02  -6.8928233e+00   6.0270280e+00  -4.3298714e+00
   2.2810986e+01  -2.8076885e+01   2.0000000e+02  -6.9872332e+00   6.6395339e+00  -3.3880659e+00
   2.2955670e+01  -2.8062427e+01   2.0000000e+02  -7.1044898e+00   7.1354017e+00  -2.4064536e+00
   2.3099498e+01  -2.8042528e+01   2.0000000e+02  -7.2400300e+00   7.5082379e+00  -1.4172364e+00
   2.3242202e+01  -2.8017226e+01   2.0000000e+02  -7.3872665e+00   7.7602277e+00  -4.5254544e-01
   2.3383515e+01  -2.7986567e+01   2.0000000e+02  -7.5384650e+00   7.9013758e+00   4.5896915e-01
   2.3523174e+01  -2.7950611e+01   2.0000000e+02  -7.6856364e+00   7.9475387e+00   1.2948689e+00
   2.3660920e+01  -2.7909424e+01   2.0000000e+02  -7.8214039e+00   7.9177444e+00   2.0403295e+00
   2.3796496e+01  -2.7863083e+01   2.0000000e+02  -7.9396767e+00   7.8314585e+00   2.6882357e+00
   2.3929654e+01  -2.7811676e+01   2.0000000e+02  -8.0361023e+00   7.7063060e+00   3.2381833e+00
   2.4060150e+01  -2.7755298e+01   2.0000000e+02  -8.1082604e+00   7.5565876e+00   3.6946651e+00
   2.4187744e+01  -2.7694055e+01   2.0000000e+02  -8.1555833e+00   7.3926506e+00   4.0651155e+00
   2.4312205e+01  -2.7628060e+01   2.0000000e+02  -8.1791028e+00   7.2209938e+00   4.3581001e+00
   2.4433310e+01  -2.7557436e+01   2.0000000e+02  -8.1810733e+00   7.0448942e+00   4.5819221e+00
   2.4550840e+01  -2.7482315e+01   2.0000000e+02  -8.1645851e+00   6.8653368e+00   4.7436944e+00
   2.4664587e+01  -2.7402835e+01   2.0000000e+02  -8.1331925e+00   6.6819995e+00   4.8489527e+00
   2.4774350e+01  -2.7319142e+01   2.0000000e+02  -8.0906086e+00   6.4941685e+00   4.9016451e+00
   2.4879937e+01  -2.7231392e+01   2.0000000e+02  -8.0404707e+00   6.3014234e+00   4.9044361e+00
   2.4981165e+01  -2.7139745e+01   2.0000000e+02  -7.9861862e+00   6.1040469e+00   4.8590908e+00
   2.5077861e+01  -2.7044369e+01   2.0000000e+02  -7.9307948e+00   5.9030940e+00   4.7669281e+00
   2.5169861e+01  -2.6945437e+01   2.0000000e+02  -7.8768311e+00   5.7002140e+00   4.6291209e+00
   2.5257010e+01  -2.6843131e+01   2.0000000e+02  -7.8261257e+00   5.4973139e+00   4.4468992e+00
   2.5339165e+01  -2.6737636e+01   2.0000000e+02  -7.7795517e+00   5.2962399e+00   4.2216133e+00
   2.5416191e+01  -2.6629143e+01   2.0000000e+02  -7.7367658e+00   5.0986227e+00   3.9548149e+00
   2.5487966e+01  -2.6517847e+01   2.0000000e+02  -7.6960405e+00   4.9058982e+00   3.6484389e+00
   2.5554375e+01  -2.6403948e+01   2.0000000e+02  -7.6543179e+00   4.7195247e+00   3.3050684e+00
   2.5615318e+01  -2.6287652e+01   2.0000000e+02  -7.6075358e+00   4.5411905e+00   2.9282751e+00
   2.5670702e+01  -2.6169165e+01   2.0000000e+02  -7.5512074e+00   4.3729892e+00   2.5227597e+00
   2.5720446e+01  -2.6048698e+01   2.0000000e+02  -7.4811102e+00   4.2173629e+00   2.0943358e+00
   2.5764481e+01  -2.5926466e+01   2.0000000e+02  -7.3939145e+00   4.0768699e+00   1.6495730e+00
   2.5802745e+01  -2.5802684e+01   2.0000000e+02  -7.2875991e+00   3.9538229e+00   1.1951923e+00
   2.5835191e+01  -2.5677571e+01   2.0000000e+02  -7.1616145e+00   3.8498308e+00   7.3743618e-01
   2.5861780e+01  -2.5551347e+01   2.0000000e+02  -7.0168333e+00   3.7654240e+00   2.8142684e-01
   2.5882485e+01  -2.5424232e+01   2.0000000e+02  -6.8553852e+00   3.6997451e+00  -1.6933019e-01
   2.5897288e+01  -2.5296449e+01   2.0000000e+02  -6.6804229e+00   3.6503870e+00  -6.1333963e-01
   2.5906183e+01  -2.5168220e+01   2.0000000e+02  -6.4957489e+00   3.6133375e+00  -1.0514480e+00
   2.5909172e+01  -2.5039767e+01   2.0000000e+02  -6.3051912e+00   3.5830523e+00  -1.4870304e+00
   2.5906269e+01  -2.4911313e+01   2.0000000e+02  -6.1116552e+00   3.5526026e+00  -1.9258459e+00
   2.5897498e+01  -2.4783078e+01   2.0000000e+02  -5.9159414e+00   3.5139286e+00  -2.3753684e+00
   2.5882891e+01  -2.4655284e+01   2.0000000e+02  -5.7156695e+00   3.4581898e+00  -2.8433980e+00
   2.5862492e+01  -2.4528148e+01   2.0000000e+02  -5.5047156e+00   3.3761953e+00  -3.3361068e+00
   2.5836353e+01  -2.4401889e+01   2.0000000e+02  -5.2735695e+00   3.2589648e+00  -3.8558531e+00
   2.5804534e+01  -2.4276721e+01   2.0000000e+02  -5.0106980e+00   3.0983503e+00  -4.3994027e+00
   2.5767107e+01  -2.4152857e+01   2.0000000e+02  -4.7047500e+00   2.8877003e+00  -4.9570378e+00
   2.5724151e+01  -2.4030507e+01   2.0000000e+02  -4.3470536e+00   2.6224807e+00  -5.5130135e+00
   2.5675754e+01  -2.3909876e+01   2.0000000e+02  -3.9337885e+00   2.3007177e+00  -6.0472999e+00
   2.5622011e+01  -2.3791169e+01   2.0000000e+02  -3.4672513e+00   1.9231995e+00  -6.5382634e+00
   2.5563027e+01  -2.3674584e+01   2.0000000e+02  -2.9558475e+00   1.4933245e+00  -6.9656904e+00
   2.5498915e+01  -2.3560318e+01   2.0000000e+02  -2.4128638e+00   1.0166902e+00  -7.3133926e+00
   2.5429794e+01  -2.3448561e+01   2.0000000e+02  -1.8543321e+00   5.0044138e-01  -7.5708693e+00
   2.5355792e+01  -2.3339499e+01   2.0000000e+02  -1.2966529e+00  -4.7396889e-02  -7.7337016e+00
   2.5277042e+01  -2.3233315e+01   2.0000000e+02  -7.5451127e-01  -6.1851217e-01  -7.8028441e+00
   2.5193686e+01  -2.3130184e+01   2.0000000e+02  -2.3955063e-01  -1.2047275e+00  -7.7831626e+00
   2.5105873e+01  -2.3030278e+01   2.0000000e+02   2.4005179e-01  -1.7982013e+00  -7.6817526e+00
   2.5013755e+01  -2.2933761e+01   2.0000000e+02   6.7925859e-01  -2.3915218e+00  -7.5064644e+00
   2.4917495e+01  -2.2840793e+01   2.0000000e+02   1.0752864e+00  -2.9776653e+00  -7.2649323e+00
   2.4817258e+01  -2.2751528e+01   2.0000000e+02   1.4266155e+00  -3.5500434e+00  -6.9641752e+00
   2.4713215e+01  -2.2666113e+01   2.0000000e+02   1.7320666e+00  -4.1026019e+00  -6.6106840e+00
   2.4605544e+01  -2.2584686e+01   2.0000000e+02   1.9902006e+00  -4.6300645e+00  -6.2108052e+00
   2.4494428e+01  -2.2507383e+01   2.0000000e+02   2.1991312e+00  -5.1283006e+00  -5.7711924e+00
   2.4380052e+01  -2.2434330e+01   2.0000000e+02   2.3567421e+00  -5.5948146e+00  -5.2990251e+00
   2.4262609e+01  -2.2365647e+01   2.0000000e+02   2.4611938e+00  -6.0291380e+00  -4.8019176e+00
   2.4142293e+01  -2.2301445e+01   2.0000000e+02   2.5116046e+00  -6.4330783e+00  -4.2873695e+00
   2.4019305e+01  -2.2241829e+01   2.0000000e+02   2.5086765e+00  -6.8105727e+00  -3.7619533e+00
   2.3893846e+01  -2.2186898e+01   2.0000000e+02   2.4551294e+00  -7.1671646e+00  -3.2303831e+00
   2.3766125e+01  -2.2136739e+01   2.0000000e+02   2.3558020e+00  -7.5090746e+00  -2.6948366e+00
   2.3636349e+01  -2.2091435e+01   2.0000000e+02   2.2174677e+00  -7.8421503e+00  -2.1547242e+00
   2.3504731e+01  -2.2051060e+01   2.0000000e+02   2.0483878e+00  -8.1708832e+00  -1.6070342e+00
   2.3371486e+01  -2.2015679e+01   2.0000000e+02   1.8577597e+00  -8.4978111e+00  -1.0470898e+00
   2.3236830e+01  -2.1985350e+01   2.0000000e+02   1.6551667e+00  -8.8233877e+00  -4.6948349e-01
   2.3100982e+01  -2.1960121e+01   2.0000000e+02   1.4500801e+00  -9.1462473e+00   1.3111024e-01
   2.2964163e+01  -2.1940034e+01   2.0000000e+02   1.2514605e+00  -9.4636887e+00   7.5945304e-01
   2.2826593e+01  -2.1925122e+01   2.0000000e+02   1.0674088e+00  -9.7721122e+00   1.4196369e+00
   2.2688496e+01  -2.1915408e+01   2.0000000e+02   9.0489984e-01  -1.0067210e+01   2.1151733e+00
   2.2550094e+01  -2.1910909e+01   2.0000000e+02   7.6961891e-01  -1.0343891e+01   2.8491693e+00
   2.2411611e+01  -2.1911631e+01   2.0000000e+02   6.6589717e-01  -1.0595950e+01   3.6242772e+00
   2.2273271e+01  -2.1917574e+01   2.0000000e+02   5.9683343e-01  -1.0815690e+01   4.4423646e+00
   2.2135297e+01  -2.1928727e+01   2.0000000e+02   5.6452183e-01  -1.0993696e+01   5.3038278e+00
   2.1997912e+01  -2.1945073e+01   2.0000000e+02   5.7043246e-01  -1.1118987e+01   6.2066466e+00
   2.1861340e+01  -2.1966586e+01   2.0000000e+02   6.1578880e-01  -1.1179664e+01   7.1453722e+00
   2.1725799e+01  -2.1993229e+01   2.0000000e+02   7.0188850e-01  -1.1164088e+01   8.1103765e+00
   2.1591512e+01  -2.2024961e+01   2.0000000e+02   8.3034579e-01  -1.1062452e+01   9.0874686e+00
   2.1458695e+01  -2.2061730e+01   2.0000000e+02   1.0030602e+00  -1.0868453e+01   1.0058312e+01
   2.1327566e+01  -2.2103475e+01   2.0000000e+02   1.2220459e+00  -1.0580751e+01   1.1001428e+01
   2.1198337e+01  -2.2150129e+01   2.0000000e+02   1.4891104e+00  -1.0203821e+01   1.1893907e+01
   2.1071220e+01  -2.2201616e+01   2.0000000e+02   1.8054295e+00  -9.7480062e+00   1.2713316e+01
   2.0946424e+01  -2.2257853e+01   2.0000000e+02   2.1711695e+00  -9.2287092e+00   1.3439578e+01
   2.0824155e+01  -2.2318747e+01   2.0000000e+02   2.5851692e+00  -8.6648952e+00   1.4056379e+01
   2.0704614e+01  -2.2384199e+01   2.0000000e+02   3.0447927e+00  -8.0772479e+00   1.4551904e+01
   2.0588000e+01  -2.2454103e+01   2.0000000e+02   3.5458520e+00  -7.4863894e+00   1.4918826e+01
   2.0474506e+01  -2.2528343e+01   2.0000000e+02   4.0825591e+00  -6.9114224e+00   1.5153782e+01
   2.0364324e+01  -2.2606800e+01   2.0000000e+02   4.6475606e+00  -6.3690471e+00   1.5256554e+01
   2.0257639e+01  -2.2689343e+01   2.0000000e+02   5.2318302e+00  -5.8731247e+00   1.5229348e+01
   2.0154632e+01  -2.2775838e+01   2.0000000e+02   5.8247408e+00  -5.4346745e+00   1.5076298e+01
   2.0055477e+01  -2.2866142e+01   2.0000000e+02   6.4141326e+00  -5.0620068e+00   1.4803353e+01
   1.9960346e+01  -2.2960106e+01   2.0000000e+02   6.9866770e+00  -4.7609061e+00   1.4418426e+01
   1.9869404e+01  -2.3057577e+01   2.0000000e+02   7.5284886e+00  -4.5346765e+00   1.3931618e+01
   1.9782808e+01  -2.3158392e+01   2.0000000e+02   8.0259309e+00  -4.3841047e+00   1.3355359e+01
   1.9700711e+01  -2.3262384e+01   2.0000000e+02   8.4666788e+00  -4.3074552e+00   1.2704178e+01
   1.9623261e+01  -2.3369382e+01   2.0000000e+02   8.8407259e+00  -4.3005238e+00   1.1994104e+01
   1.9550595e+01  -2.3479208e+01   2.0000000e+02   9.1411865e+00  -4.3568418e+00   1.1241739e+01
   1.9482847e+01  -2.3591678e+01   2.0000000e+02   9.3648198e+00  -4.4681552e+00   1.0463049e+01
   1.9420141e+01  -2.3706605e+01   2.0000000e+02   9.5120450e+00  -4.6250380e+00   9.6720800e+00
   1.9362596e+01  -2.3823796e+01   2.0000000e+02   9.5864326e+00  -4.8176320e+00   8.8798799e+00
   1.9310322e+01  -2.3943055e+01   2.0000000e+02   9.5936976e+00  -5.0363584e+00   8.0937719e+00
   1.9263420e+01  -2.4064182e+01   2.0000000e+02   9.5403535e+00  -5.2724928e+00   7.3172426e+00
   1.9221985e+01  -2.4186972e+01   2.0000000e+02   9.4323077e+00  -5.5185224e+00   6.5504815e+00
   1.9186102e+01  -2.4311218e+01   2.0000000e+02   9.2736841e+00  -5.7682243e+00   5.7915140e+00
   1.9155847e+01  -2.4436709e+01   2.0000000e+02   9.0661925e+00  -6.0165113e+00   5.0377362e+00
   1.9131290e+01  -2.4563232e+01   2.0000000e+02   8.8091903e+00  -6.2591587e+00   4.2874460e+00
   1.9112488e+01  -2.4690571e+01   2.0000000e+02   8.5003785e+00  -6.4924749e+00   3.5411214e+00
   1.9099491e+01  -2.4818509e+01   2.0000000e+02   8.1369636e+00  -6.7131299e+00   2.8020390e+00
   1.9092340e+01  -2.4946827e+01   2.0000000e+02   7.7169246e+00  -6.9181214e+00   2.0762787e+00
   1.9091065e+01  -2.5075303e+01   2.0000000e+02   7.2400993e+00  -7.1049197e+00   1.3721525e+00
   1.9095686e+01  -2.5203716e+01   2.0000000e+02   6.7088816e+00  -7.2717486e+00   6.9922497e-01
   1.9106215e+01  -2.5331844e+01   2.0000000e+02   6.1285169e+00  -7.4178816e+00   6.7219402e-02
   1.9122651e+01  -2.5459465e+01   2.0000000e+02   5.5070292e+00  -7.5438487e+00  -5.1505222e-01
   1.9144986e+01  -2.5586355e+01   2.0000000e+02   4.8549055e+00  -7.6515068e+00  -1.0407626e+00
   1.9173198e+01  -2.5712294e+01   2.0000000e+02   4.1844988e+00  -7.7438547e+00  -1.5060348e+00
   1.9207258e+01  -2.5837061e+01   2.0000000e+02   3.5092378e+00  -7.8246211e+00  -1.9108436e+00
   1.9247123e+01  -2.5960436e+01   2.0000000e+02   2.8425183e+00  -7.8975827e+00  -2.2596028e+00
   1.9292743e+01  -2.6082202e+01   2.0000000e+02   2.1963691e+00  -7.9657369e+00  -2.5613470e+00
   1.9344055e+01  -2.6202142e+01   2.0000000e+02   1.5800991e+00  -8.0303997e+00  -2.8291423e+00
   1.9400984e+01  -2.6320044e+01   2.0000000e+02   9.9914016e-01  -8.0904467e+00  -3.0787677e+00
   1.9463449e+01  -2.6435698e+01   2.0000000e+02   4.5446166e-01  -8.1418891e+00  -3.3267777e+00
   1.9531353e+01  -2.6548897e+01   2.0000000e+02  -5.7291824e-02  -8.1779040e+00  -3.5881542e+00
   1.9604592e+01  -2.6659438e+01   2.0000000e+02  -5.4290330e-01  -8.1894561e+00  -3.8742123e+00
   1.9683050e+01  -2.6767121e+01   2.0000000e+02  -1.0110681e+00  -8.1663952e+00  -4.1910230e+00
   1.9766599e+01  -2.6871753e+01   2.0000000e+02  -1.4706029e+00  -8.0988706e+00  -4.5387853e+00
   1.9855105e+01  -2.6973144e+01   2.0000000e+02  -1.9287023e+00  -7.9787770e+00  -4.9123018e+00
   2.0276273e+01  -2.7525541e+01   2.0000000e+02  -4.3103041e+00  -6.4831938e+00  -5.9918249e+00
   2.0391263e+01  -2.7604104e+01   2.0000000e+02  -4.7335049e+00  -6.0894116e+00  -6.3268005e+00
   2.0509864e+01  -2.7678433e+01   2.0000000e+02  -5.1293374e+00  -5.6578166e+00  -6.6385147e+00
   2.0631879e+01  -2.7748401e+01   2.0000000e+02  -5.4901692e+00  -5.1873479e+00  -6.9272857e+00
   2.0757106e+01  -2.7813887e+01   2.0000000e+02  -5.8103423e+00  -4.6744506e+00  -7.1923655e+00
   2.0885336e+01  -2.7874777e+01   2.0000000e+02  -6.0862563e+00  -4.1141722e+00  -7.4303976e+00
   2.1016352e+01  -2.7930967e+01   2.0000000e+02  -6.3161190e+00  -3.5017137e+00  -7.6346858e+00
   2.1149934e+01  -2.7982360e+01   2.0000000e+02  -6.4995783e+00  -2.8339127e+00  -7.7954723e+00
   2.1285852e+01  -2.8028866e+01   2.0000000e+02  -6.6374790e+00  -2.1102746e+00  -7.9009191e+00
   2.1423876e+01  -2.8070404e+01   2.0000000e+02  -6.7318967e+00  -1.3332350e+00  -7.9383957e+00
   2.1563767e+01  -2.8106902e+01   2.0000000e+02  -6.7863975e+00  -5.0797494e-01  -7.8954936e+00
   2.1705286e+01  -2.8138297e+01   2.0000000e+02  -6.8063746e+00   3.5799279e-01  -7.7605652e+00
   2.1848187e+01  -2.8164533e+01   2.0000000e+02  -6.7992172e+00   1.2548432e+00  -7.5228609e+00
   2.1992222e+01  -2.8185565e+01   2.0000000e+02  -6.7741226e+00   2.1700144e+00  -7.1727052e+00
   2.2137143e+01  -2.8201357e+01   2.0000000e+02  -6.7414563e+00   3.0874478e+00  -6.7022421e+00
   2.2282695e+01  -2.8211879e+01   2.0000000e+02  -6.7117492e+00   3.9869980e+00  -6.1070358e+00
   2.2428627e+01  -2.8217116e+01   2.0000000e+02  -6.6945241e+00   4.8448421e+00  -5.3881978e+00
   2.2574683e+01  -2.8217055e+01   2.0000000e+02  -6.6972244e+00   5.6350598e+00  -4.5545622e+00
   2.2720608e+01  -2.8211700e+01   2.0000000e+02  -6.7244576e+00   6.3324926e+00  -3.6238019e+00
   2.2866149e+01  -2.8201057e+01   2.0000000e+02  -6.7777095e+00   6.9161210e+00  -2.6220442e+00
   2.3011052e+01  -2.8185146e+01   2.0000000e+02  -6.8554753e+00   7.3720804e+00  -1.5817408e+00
   2.3155065e+01  -2.8163996e+01   2.0000000e+02  -6.9537430e+00   7.6955563e+00  -5.3825352e-01
   2.3297937e+01  -2.8137642e+01   2.0000000e+02  -7.0666830e+00   7.8910852e+00   4.7403568e-01
   2.3439422e+01  -2.8106131e+01   2.0000000e+02  -7.1874039e+00   7.9713236e+00   1.4253397e+00
   2.3579274e+01  -2.8069518e+01   2.0000000e+02  -7.3087416e+00   7.9546554e+00   2.2929643e+00
   2.3717252e+01  -2.8027866e+01   2.0000000e+02  -7.4239949e+00   7.8622723e+00   3.0625229e+00
   2.3853120e+01  -2.7981249e+01   2.0000000e+02  -7.5275323e+00   7.7153298e+00   3.7277477e+00
   2.3986646e+01  -2.7929747e+01   2.0000000e+02  -7.6152429e+00   7.5326891e+00   4.2891616e+00
   2.4117601e+01  -2.7873449e+01   2.0000000e+02  -7.6847314e+00   7.3295126e+00   4.7521545e+00
   2.4245765e+01  -2.7812453e+01   2.0000000e+02  -7.7352835e+00   7.1167248e+00   5.1249322e+00
   2.4370922e+01  -2.7746865e+01   2.0000000e+02  -7.7676503e+00   6.9012299e+00   5.4166189e+00
   2.4492862e+01  -2.7676797e+01   2.0000000e+02  -7.7837055e+00   6.6866223e+00   5.6358582e+00
   2.4611383e+01  -2.7602370e+01   2.0000000e+02  -7.7860333e+00   6.4741422e+00   5.7899869e+00
   2.4726290e+01  -2.7523713e+01   2.0000000e+02  -7.7775482e+00   6.2636919e+00   5.8846869e+00
   2.4837393e+01  -2.7440959e+01   2.0000000e+02  -7.7611934e+00   6.0547549e+00   5.9240392e+00
   2.4944514e+01  -2.7354250e+01   2.0000000e+02  -7.7397074e+00   5.8470440e+00   5.9109577e+00
   2.5047479e+01  -2.7263734e+01   2.0000000e+02  -7.7155546e+00   5.6409130e+00   5.8476318e+00
   2.5146126e+01  -2.7169566e+01   2.0000000e+02  -7.6909053e+00   5.4373829e+00   5.7360268e+00
   2.5240299e+01  -2.7071903e+01   2.0000000e+02  -7.6676639e+00   5.2379461e+00   5.5781197e+00
   2.5329851e+01  -2.6970912e+01   2.0000000e+02  -7.6473886e+00   5.0441521e+00   5.3760185e+00
   2.5414645e+01  -2.6866763e+01   2.0000000e+02  -7.6310960e+00   4.8572310e+00   5.1318213e+00
   2.5494552e+01  -2.6759630e+01   2.0000000e+02  -7.6189216e+00   4.6778724e+00   4.8474838e+00
   2.5569454e+01  -2.6649693e+01   2.0000000e+02  -7.6097418e+00   4.5062318e+00   4.5248545e+00
   2.5639242e+01  -2.6537136e+01   2.0000000e+02  -7.6009386e+00   4.3421873e+00   4.1659210e+00
   2.5703813e+01  -2.6422145e+01   2.0000000e+02  -7.5884620e+00   4.1857125e+00   3.7732709e+00
   2.5763079e+01  -2.6304912e+01   2.0000000e+02  -7.5672578e+00   4.0371678e+00   3.3506489e+00
   2.5816957e+01  -2.6185630e+01   2.0000000e+02  -7.5320232e+00   3.8975069e+00   2.9032369e+00
   2.5865377e+01  -2.6064495e+01   2.0000000e+02  -7.4780717e+00   3.7682018e+00   2.4376420e+00
   2.5908276e+01  -2.5941708e+01   2.0000000e+02  -7.4020951e+00   3.6510285e+00   1.9614444e+00
   2.5945602e+01  -2.5817467e+01   2.0000000e+02  -7.3026224e+00   3.5477129e+00   1.4824193e+00
   2.5977311e+01  -2.5691977e+01   2.0000000e+02  -7.1801396e+00   3.4595831e+00   1.0077231e+00
   2.6003372e+01  -2.5565441e+01   2.0000000e+02  -7.0369144e+00   3.3872597e+00   5.4309112e-01
   2.6023759e+01  -2.5438065e+01   2.0000000e+02  -6.8766793e+00   3.3304668e+00   9.2254210e-02
   2.6038458e+01  -2.5310053e+01   2.0000000e+02  -6.7042332e+00   3.2878821e+00  -3.4350119e-01
   2.6047463e+01  -2.5181612e+01   2.0000000e+02  -6.5249553e+00   3.2570663e+00  -7.6563091e-01
   2.6050779e+01  -2.5052948e+01   2.0000000e+02  -6.3440939e+00   3.2343998e+00  -1.1785086e+00
   2.6048417e+01  -2.4924267e+01   2.0000000e+02  -6.1657628e+00   3.2150641e+00  -1.5892908e+00
   2.6040400e+01  -2.4795773e+01   2.0000000e+02  -5.9917128e+00   3.1930401e+00  -2.0072421e+00
   2.6026758e+01  -2.4667672e+01   2.0000000e+02  -5.8201798e+00   3.1612151e+00  -2.4423649e+00
   2.6007529e+01  -2.4540166e+01   2.0000000e+02  -5.6452147e+00   3.1115936e+00  -2.9034205e+00
   2.5982761e+01  -2.4413457e+01   2.0000000e+02  -5.4569070e+00   3.0356679e+00  -3.3956290e+00
   2.5952508e+01  -2.4287744e+01   2.0000000e+02  -5.2426414e+00   2.9249681e+00  -3.9186671e+00
   2.5916835e+01  -2.4163224e+01   2.0000000e+02  -4.9892565e+00   2.7717396e+00  -4.4654736e+00
   2.5875813e+01  -2.4040093e+01   2.0000000e+02  -4.6856365e+00   2.5696986e+00  -5.0223331e+00
   2.5829521e+01  -2.3918543e+01   2.0000000e+02  -4.3251253e+00   2.3146957e+00  -5.5703096e+00
   2.5778045e+01  -2.3798764e+01   2.0000000e+02  -3.9071537e+00   2.0051721e+00  -6.0877597e+00
   2.5721479e+01  -2.3680941e+01   2.0000000e+02  -3.4376517e+00   1.6422749e+00  -6.5533865e+00
   2.5659924e+01  -2.3565257e+01   2.0000000e+02  -2.9281633e+00   1.2296310e+00  -6.9490976e+00
   2.5593487e+01  -2.3451890e+01   2.0000000e+02  -2.3939030e+00   7.7281565e-01  -7.2620584e+00
   2.5522283e+01  -2.3341017e+01   2.0000000e+02  -1.8513361e+00   2.7870543e-01  -7.4855181e+00
   2.5446433e+01  -2.3232808e+01   2.0000000e+02  -1.3158458e+00  -2.4517977e-01  -7.6184377e+00
   2.5366063e+01  -2.3127428e+01   2.0000000e+02  -8.0006936e-01  -7.9115830e-01  -7.6641863e+00
   2.5281307e+01  -2.3025039e+01   2.0000000e+02  -3.1314801e-01  -1.3516527e+00  -7.6288265e+00
   2.5192303e+01  -2.2925798e+01   2.0000000e+02   1.3918192e-01  -1.9193024e+00  -7.5194882e+00
   2.5099196e+01  -2.2829857e+01   2.0000000e+02   5.5382966e-01  -2.4869435e+00  -7.3431721e+00
   2.5002135e+01  -2.2737362e+01   2.0000000e+02   9.2930081e-01  -3.0475831e+00  -7.1061535e+00
   2.4901275e+01  -2.2648453e+01   2.0000000e+02   1.2646358e+00  -3.5944168e+00  -6.8139628e+00
   2.4796777e+01  -2.2563265e+01   2.0000000e+02   1.5585969e+00  -4.1209727e+00  -6.4717969e+00
   2.4688803e+01  -2.2481928e+01   2.0000000e+02   1.8092439e+00  -4.6214359e+00  -6.0851188e+00
   2.4577524e+01  -2.2404565e+01   2.0000000e+02   2.0138950e+00  -5.0911020e+00  -5.6602191e+00
   2.4463110e+01  -2.2331292e+01   2.0000000e+02   2.1695008e+00  -5.5269810e+00  -5.2044726e+00
   2.4345741e+01  -2.2262222e+01   2.0000000e+02   2.2732464e+00  -5.9283204e+00  -4.7261997e+00
   2.4225595e+01  -2.2197457e+01   2.0000000e+02   2.3232946e+00  -6.2970131e+00  -4.2339588e+00
   2.4102858e+01  -2.2137095e+01   2.0000000e+02   2.3194320e+00  -6.6375463e+00  -3.7355535e+00
   2.3977715e+01  -2.2081227e+01   2.0000000e+02   2.2635066e+00  -6.9565278e+00  -3.2368478e+00
   2.3850358e+01  -2.2029938e+01   2.0000000e+02   2.1595409e+00  -7.2617047e+00  -2.7408520e+00
   2.3720978e+01  -2.1983304e+01   2.0000000e+02   2.0135332e+00  -7.5607495e+00  -2.2472643e+00
   2.3589772e+01  -2.1941395e+01   2.0000000e+02   1.8330419e+00  -7.8600343e+00  -1.7527122e+00
   2.3456937e+01  -2.1904275e+01   2.0000000e+02   1.6266621e+00  -8.1637649e+00  -1.2515074e+00
   2.3322672e+01  -2.1871998e+01   2.0000000e+02   1.4035044e+00  -8.4736002e+00  -7.3671927e-01
   2.3187180e+01  -2.1844614e+01   2.0000000e+02   1.1727744e+00  -8.7887877e+00  -2.0123074e-01
   2.3050662e+01  -2.1822163e+01   2.0000000e+02   9.4338860e-01  -9.1066472e+00   3.6154031e-01
   2.2913322e+01  -2.1804679e+01   2.0000000e+02   7.2368281e-01  -9.4231237e+00   9.5726293e-01
   2.2775366e+01  -2.1792188e+01   2.0000000e+02   5.2112875e-01  -9.7332122e+00   1.5906674e+00
   2.2637000e+01  -2.1784709e+01   2.0000000e+02   3.4209882e-01  -1.0031127e+01   2.2656805e+00
   2.2498430e+01  -2.1782252e+01   2.0000000e+02   1.9169823e-01  -1.0310202e+01   2.9855081e+00
   2.2359861e+01  -2.1784823e+01   2.0000000e+02   7.3742090e-02  -1.0562636e+01   3.7525255e+00
   2.2221502e+01  -2.1792416e+01   2.0000000e+02  -9.1691283e-03  -1.0779232e+01   4.5678306e+00
   2.2083558e+01  -2.1805020e+01   2.0000000e+02  -5.5389136e-02  -1.0949373e+01   5.4306164e+00
   2.1946235e+01  -2.1822617e+01   2.0000000e+02  -6.3893000e-02  -1.1061342e+01   6.3373054e+00
   2.1809738e+01  -2.1845180e+01   2.0000000e+02  -3.3925310e-02  -1.1103109e+01   7.2807613e+00
   2.1674271e+01  -2.1872676e+01   2.0000000e+02   3.5328798e-02  -1.1063558e+01   8.2497770e+00
   2.1540036e+01  -2.1905063e+01   2.0000000e+02   1.4492959e-01  -1.0933975e+01   9.2290470e+00
   2.1407236e+01  -2.1942292e+01   2.0000000e+02   2.9623966e-01  -1.0709560e+01   1.0199743e+01
   2.1276069e+01  -2.1984309e+01   2.0000000e+02   4.9081867e-01  -1.0390596e+01   1.1140763e+01
   2.1146733e+01  -2.2031049e+01   2.0000000e+02   7.3014797e-01  -9.9830325e+00   1.2030336e+01
   2.1019424e+01  -2.2082443e+01   2.0000000e+02   1.0153543e+00  -9.4982830e+00   1.2847855e+01
   2.0894334e+01  -2.2138413e+01   2.0000000e+02   1.3468670e+00  -8.9522560e+00   1.3575487e+01
   2.0771653e+01  -2.2198876e+01   2.0000000e+02   1.7241894e+00  -8.3638502e+00   1.4199274e+01
   2.0651568e+01  -2.2263739e+01   2.0000000e+02   2.1456995e+00  -7.7532071e+00   1.4709582e+01
   2.0534263e+01  -2.2332907e+01   2.0000000e+02   2.6086134e+00  -7.1400855e+00   1.5100905e+01
   2.0419919e+01  -2.2406273e+01   2.0000000e+02   3.1088578e+00  -6.5426061e+00   1.5371183e+01
   2.0308713e+01  -2.2483727e+01   2.0000000e+02   3.6410614e+00  -5.9764940e+00   1.5520930e+01
   2.0200816e+01  -2.2565153e+01   2.0000000e+02   4.1984281e+00  -5.4547856e+00   1.5552423e+01
   2.0096398e+01  -2.2650427e+01   2.0000000e+02   4.7726117e+00  -4.9879073e+00   1.5469171e+01
   1.9995623e+01  -2.2739418e+01   2.0000000e+02   5.3536787e+00  -4.5838554e+00   1.5275774e+01
   1.9898650e+01  -2.2831994e+01   2.0000000e+02   5.9302769e+00  -4.2484083e+00   1.4978070e+01
   1.9805634e+01  -2.2928011e+01   2.0000000e+02   6.4899191e+00  -3.9852129e+00   1.4583499e+01
   1.9716725e+01  -2.3027325e+01   2.0000000e+02   7.0197046e+00  -3.7957792e+00   1.4101373e+01
   1.9632067e+01  -2.3129783e+01   2.0000000e+02   7.5070963e+00  -3.6793941e+00   1.3542994e+01
   1.9551798e+01  -2.3235229e+01   2.0000000e+02   7.9409116e+00  -3.6331122e+00   1.2921389e+01
   1.9476052e+01  -2.3343501e+01   2.0000000e+02   8.3122089e+00  -3.6518751e+00   1.2250730e+01
   1.9404954e+01  -2.3454432e+01   2.0000000e+02   8.6149880e+00  -3.7287993e+00   1.1545447e+01
   1.9338627e+01  -2.3567853e+01   2.0000000e+02   8.8465949e+00  -3.8557062e+00   1.0819153e+01
   1.9277184e+01  -2.3683587e+01   2.0000000e+02   9.0076249e+00  -4.0236944e+00   1.0083618e+01
   1.9220732e+01  -2.3801457e+01   2.0000000e+02   9.1014523e+00  -4.2238409e+00   9.3478286e+00
   1.9169372e+01  -2.3921279e+01   2.0000000e+02   9.1332788e+00  -4.4477644e+00   8.6174865e+00
   1.9123198e+01  -2.4042867e+01   2.0000000e+02   9.1089374e+00  -4.6880568e+00   7.8949321e+00
   1.9082297e+01  -2.4166031e+01   2.0000000e+02   9.0336264e+00  -4.9384619e+00   7.1796693e+00
   1.9046746e+01  -2.4290580e+01   2.0000000e+02   8.9108622e+00  -5.1938203e+00   6.4693684e+00
   1.9016617e+01  -2.4416318e+01   2.0000000e+02   8.7419182e+00  -5.4498358e+00   5.7612081e+00
   1.8991974e+01  -2.4543048e+01   2.0000000e+02   8.5258434e+00  -5.7027536e+00   5.0532225e+00
   1.8972871e+01  -2.4670569e+01   2.0000000e+02   8.2600688e+00  -5.9490546e+00   4.3454394e+00
   1.8959356e+01  -2.4798682e+01   2.0000000e+02   7.9414202e+00  -6.1853274e+00   3.6404551e+00
   1.8951466e+01  -2.4927181e+01   2.0000000e+02   7.5672709e+00  -6.4082477e+00   2.9435816e+00
   1.8949233e+01  -2.5055864e+01   2.0000000e+02   7.1365458e+00  -6.6148114e+00   2.2623292e+00
   1.8952678e+01  -2.5184526e+01   2.0000000e+02   6.6504389e+00  -6.8025871e+00   1.6057337e+00
   1.8961812e+01  -2.5312959e+01   2.0000000e+02   6.1127915e+00  -6.9700399e+00   9.8345979e-01
   1.8976640e+01  -2.5440959e+01   2.0000000e+02   5.5301418e+00  -7.1168125e+00   4.0482669e-01
   1.8997156e+01  -2.5568319e+01   2.0000000e+02   4.9116047e+00  -7.2438375e+00  -1.2205992e-01
   1.9023345e+01  -2.5694833e+01   2.0000000e+02   4.2685156e+00  -7.3533157e+00  -5.9129662e-01
   1.9055182e+01  -2.5820297e+01   2.0000000e+02   3.6138387e+00  -7.4484738e+00  -1.0001508e+00
   1.9092635e+01  -2.5944507e+01   2.0000000e+02   2.9612801e+00  -7.5331131e+00  -1.3499455e+00
   1.9135659e+01  -2.6067259e+01   2.0000000e+02   2.3240775e+00  -7.6109343e+00  -1.6465815e+00
   1.9184203e+01  -2.6188354e+01   2.0000000e+02   1.7135641e+00  -7.6847559e+00  -1.9005622e+00
   1.9238205e+01  -2.6307592e+01   2.0000000e+02   1.1378355e+00  -7.7556877e+00  -2.1261958e+00
   1.9297592e+01  -2.6424776e+01   2.0000000e+02   6.0071524e-01  -7.8224622e+00  -2.3400775e+00
   1.9362282e+01  -2.6539714e+01   2.0000000e+02   1.0135117e-01  -7.8810944e+00  -2.5590163e+00
   1.9432187e+01  -2.6652214e+01   2.0000000e+02  -3.6540426e-01  -7.9250090e+00  -2.7977885e+00
   1.9507204e+01  -2.6762089e+01   2.0000000e+02  -8.0792515e-01  -7.9456489e+00  -3.0670560e+00
   1.9587223e+01  -2.6869156e+01   2.0000000e+02  -1.2362108e+00  -7.9335726e+00  -3.3720459e+00
   1.9672127e+01  -2.6973236e+01   2.0000000e+02  -1.6600723e+00  -7.8797942e+00  -3.7121058e+00
   1.9761785e+01  -2.7074154e+01   2.0000000e+02  -2.0874255e+00  -7.7771147e+00  -4.0812130e+00
   1.9856060e+01  -2.7171739e+01   2.0000000e+02  -2.5230058e+00  -7.6211702e+00  -4.4694580e+00
   1.9954807e+01  -2.7265827e+01   2.0000000e+02  -2.9676758e+00  -7.4108938e+00  -4.8650343e+00
   2.0057868e+01  -2.7356258e+01   2.0000000e+02  -3.4183810e+00  -7.1482823e+00  -5.2563754e+00
   2.0165081e+01  -2.7442878e+01   2.0000000e+02  -3.8687770e+00  -6.8374515e+00  -5.6340511e+00
   2.0686306e+01  -2.7925669e+01   2.0000000e+02  -5.9656622e+00  -4.7471476e+00  -6.4649444e+00
   2.0814779e+01  -2.7986786e+01   2.0000000e+02  -6.2520662e+00  -4.2533339e+00  -6.7255586e+00
   2.0945959e+01  -2.8043369e+01   2.0000000e+02  -6.4919071e+00  -3.7078928e+00  -6.9622932e+00
   2.1079638e+01  -2.8095326e+01   2.0000000e+02  -6.6837632e+00  -3.1055032e+00  -7.1660656e+00
   2.1215606e+01  -2.8142574e+01   2.0000000e+02  -6.8271850e+00  -2.4434433e+00  -7.3251728e+00
   2.1353647e+01  -2.8185037e+01   2.0000000e+02  -6.9227551e+00  -1.7219938e+00  -7.4265759e+00
   2.1493540e+01  -2.8222644e+01   2.0000000e+02  -6.9724494e+00  -9.4421461e-01  -7.4569721e+00
   2.1635060e+01  -2.8255337e+01   2.0000000e+02  -6.9801322e+00  -1.1553052e-01  -7.4032703e+00
   2.1777982e+01  -2.8283060e+01   2.0000000e+02  -6.9518843e+00   7.5639887e-01  -7.2526523e+00
   2.1922073e+01  -2.8305770e+01   2.0000000e+02  -6.8960248e+00   1.6611216e+00  -6.9925241e+00
   2.2067101e+01  -2.8323429e+01   2.0000000e+02  -6.8226424e+00   2.5844376e+00  -6.6111026e+00
   2.2212832e+01  -2.8336008e+01   2.0000000e+02  -6.7427350e+00   3.5073842e+00  -6.0989386e+00
   2.2359029e+01  -2.8343488e+01   2.0000000e+02  -6.6670904e+00   4.4060019e+00  -5.4513738e+00
   2.2505454e+01  -2.8345856e+01   2.0000000e+02  -6.6051507e+00   5.2525032e+00  -4.6712894e+00
   2.2651871e+01  -2.8343107e+01   2.0000000e+02  -6.5640990e+00   6.0179368e+00  -3.7711457e+00
   2.2798041e+01  -2.8335247e+01   2.0000000e+02  -6.5483184e+00   6.6758049e+00  -2.7735086e+00
   2.2943728e+01  -2.8322288e+01   2.0000000e+02  -6.5592700e+00   7.2058053e+00  -1.7095739e+00
   2.3088695e+01  -2.8304252e+01   2.0000000e+02  -6.5957226e+00   7.5966043e+00  -6.1603350e-01
   2.3232707e+01  -2.8281167e+01   2.0000000e+02  -6.6542281e+00   7.8470773e+00   4.6904151e-01
   2.3375531e+01  -2.8253072e+01   2.0000000e+02  -6.7297078e+00   7.9658084e+00   1.5103482e+00
   2.3516939e+01  -2.8220012e+01   2.0000000e+02  -6.8161149e+00   7.9691446e+00   2.4787184e+00
   2.3656701e+01  -2.8182041e+01   2.0000000e+02  -6.9070974e+00   7.8783583e+00   3.3531454e+00
   2.3794595e+01  -2.8139219e+01   2.0000000e+02  -6.9966558e+00   7.7165587e+00   4.1214696e+00
   2.3930400e+01  -2.8091618e+01   2.0000000e+02  -7.0796944e+00   7.5059229e+00   4.7796603e+00
   2.4063901e+01  -2.8039313e+01   2.0000000e+02  -7.1524736e+00   7.2656508e+00   5.3301785e+00
   2.4194885e+01  -2.7982389e+01   2.0000000e+02  -7.2128022e+00   7.0108240e+00   5.7798802e+00
   2.4323149e+01  -2.7920938e+01   2.0000000e+02  -7.2600320e+00   6.7521042e+00   6.1379283e+00
   2.4448489e+01  -2.7855059e+01   2.0000000e+02  -7.2948677e+00   6.4961523e+00   6.4139350e+00
   2.4570713e+01  -2.7784858e+01   2.0000000e+02  -7.3190089e+00   6.2464081e+00   6.6167404e+00
   2.4689631e+01  -2.7710446e+01   2.0000000e+02  -7.3347595e+00   6.0041214e+00   6.7536187e+00
   2.4805061e+01  -2.7631944e+01   2.0000000e+02  -7.3445917e+00   5.7693197e+00   6.8301133e+00
   2.4916827e+01  -2.7549475e+01   2.0000000e+02  -7.3508316e+00   5.5416885e+00   6.8501760e+00
   2.5024761e+01  -2.7463172e+01   2.0000000e+02  -7.3554199e+00   5.3211713e+00   6.8166855e+00
   2.5128703e+01  -2.7373171e+01   2.0000000e+02  -7.3598843e+00   5.1083119e+00   6.7319933e+00
   2.5228498e+01  -2.7279614e+01   2.0000000e+02  -7.3654379e+00   4.9042639e+00   6.5984451e+00
   2.5324001e+01  -2.7182650e+01   2.0000000e+02  -7.3731373e+00   4.7104918e+00   6.4186915e+00
   2.5415073e+01  -2.7082429e+01   2.0000000e+02  -7.3840068e+00   4.5283523e+00   6.1956231e+00
   2.5501585e+01  -2.6979111e+01   2.0000000e+02  -7.3989338e+00   4.3586183e+00   5.9321454e+00
   2.5583414e+01  -2.6872856e+01   2.0000000e+02  -7.4183647e+00   4.2012406e+00   5.6307506e+00
   2.5660449e+01  -2.6763829e+01   2.0000000e+02  -7.4417832e+00   4.0553183e+00   5.2933472e+00
   2.5732583e+01  -2.6652200e+01   2.0000000e+02  -7.4672221e+00   3.9194060e+00   4.9213729e+00
   2.5799720e+01  -2.6538143e+01   2.0000000e+02  -7.4909990e+00   3.7919330e+00   4.5163254e+00
   2.5861772e+01  -2.6421832e+01   2.0000000e+02  -7.5078926e+00   3.6716684e+00   4.0804890e+00
   2.5918660e+01  -2.6303447e+01   2.0000000e+02  -7.5117742e+00   3.5580239e+00   3.6176706e+00
   2.5970313e+01  -2.6183169e+01   2.0000000e+02  -7.4965769e+00   3.4511504e+00   3.1335430e+00
   2.6016669e+01  -2.6061182e+01   2.0000000e+02  -7.4573258e+00   3.3518093e+00   2.6355133e+00
   2.6057675e+01  -2.5937671e+01   2.0000000e+02  -7.3909553e+00   3.2611088e+00   2.1320763e+00
   2.6093286e+01  -2.5812825e+01   2.0000000e+02  -7.2967293e+00   3.1802062e+00   1.6318776e+00
   2.6123465e+01  -2.5686832e+01   2.0000000e+02  -7.1762320e+00   3.1100550e+00   1.1426895e+00
   2.6148185e+01  -2.5559882e+01   2.0000000e+02  -7.0330546e+00   3.0512328e+00   6.7058391e-01
   2.6167426e+01  -2.5432165e+01   2.0000000e+02  -6.8723380e+00   3.0038502e+00   2.1931942e-01
   2.6181176e+01  -2.5303873e+01   2.0000000e+02  -6.7002804e+00   2.9674709e+00  -2.1005669e-01
   2.6189434e+01  -2.5175198e+01   2.0000000e+02  -6.5235671e+00   2.9410007e+00  -6.1950019e-01
   2.6192204e+01  -2.5046330e+01   2.0000000e+02  -6.3486010e+00   2.9225410e+00  -1.0141341e+00
   2.6189500e+01  -2.4917461e+01   2.0000000e+02  -6.1804507e+00   2.9091808e+00  -1.4020925e+00
   2.6181342e+01  -2.4788782e+01   2.0000000e+02  -6.0215737e+00   2.8968126e+00  -1.7938634e+00
   2.6167759e+01  -2.4660481e+01   2.0000000e+02  -5.8706206e+00   2.8800020e+00  -2.2009195e+00
   2.6148789e+01  -2.4532749e+01   2.0000000e+02  -5.7217496e+00   2.8520071e+00  -2.6336842e+00
   2.6124475e+01  -2.4405771e+01   2.0000000e+02  -5.5647994e+00   2.8050023e+00  -3.0992393e+00
   2.6094868e+01  -2.4279733e+01   2.0000000e+02  -5.3865228e+00   2.7305352e+00  -3.5991929e+00
   2.6060027e+01  -2.4154819e+01   2.0000000e+02  -5.1727131e+00   2.6202164e+00  -4.1283675e+00
   2.6020018e+01  -2.4031210e+01   2.0000000e+02  -4.9108172e+00   2.4665574e+00  -4.6746883e+00
   2.5974912e+01  -2.3909085e+01   2.0000000e+02  -4.5924459e+00   2.2638117e+00  -5.2204073e+00
   2.5924790e+01  -2.3788621e+01   2.0000000e+02  -4.2151904e+00   2.0086331e+00  -5.7444515e+00
   2.5869736e+01  -2.3669991e+01   2.0000000e+02  -3.7832594e+00   1.7004011e+00  -6.2254405e+00
   2.5809843e+01  -2.3553365e+01   2.0000000e+02  -3.3068308e+00   1.3411454e+00  -6.6446168e+00
   2.5745208e+01  -2.3438912e+01   2.0000000e+02  -2.8002607e+00   9.3511876e-01  -6.9880917e+00
   2.5675937e+01  -2.3326794e+01   2.0000000e+02  -2.2796597e+00   4.8814071e-01  -7.2479268e+00
   2.5602138e+01  -2.3217172e+01   2.0000000e+02  -1.7604685e+00   6.9384468e-03  -7.4219580e+00
   2.5523926e+01  -2.3110201e+01   2.0000000e+02  -1.2555958e+00  -5.0139668e-01  -7.5126094e+00
   2.5441424e+01  -2.3006035e+01   2.0000000e+02  -7.7446299e-01  -1.0297097e+00  -7.5251841e+00
   2.5354757e+01  -2.2904819e+01   2.0000000e+02  -3.2292147e-01  -1.5709374e+00  -7.4661507e+00
   2.5264056e+01  -2.2806699e+01   2.0000000e+02   9.6033793e-02  -2.1180466e+00  -7.3418187e+00
   2.5169457e+01  -2.2711812e+01   2.0000000e+02   4.8120993e-01  -2.6640007e+00  -7.1576107e+00
   2.5071102e+01  -2.2620292e+01   2.0000000e+02   8.3206255e-01  -3.2017018e+00  -6.9179670e+00
   2.4969133e+01  -2.2532269e+01   2.0000000e+02   1.1477722e+00  -3.7240735e+00  -6.6267372e+00
   2.4863703e+01  -2.2447865e+01   2.0000000e+02   1.4266239e+00  -4.2242519e+00  -6.2878709e+00
   2.4754962e+01  -2.2367199e+01   2.0000000e+02   1.6658536e+00  -4.6959927e+00  -5.9061681e+00
   2.4643070e+01  -2.2290385e+01   2.0000000e+02   1.8618219e+00  -5.1342051e+00  -5.4878766e+00
   2.4528186e+01  -2.2217530e+01   2.0000000e+02   2.0105539e+00  -5.5356616e+00  -5.0408782e+00
   2.4410476e+01  -2.2148736e+01   2.0000000e+02   2.1084328e+00  -5.8996371e+00  -4.5744036e+00
   2.4290106e+01  -2.2084099e+01   2.0000000e+02   2.1529613e+00  -6.2283822e+00  -4.0981763e+00
   2.4167247e+01  -2.2023709e+01   2.0000000e+02   2.1433849e+00  -6.5271532e+00  -3.6211878e+00
   2.4042073e+01  -2.1967650e+01   2.0000000e+02   2.0810757e+00  -6.8037169e+00  -3.1503392e+00
   2.3914760e+01  -2.1916000e+01   2.0000000e+02   1.9695988e+00  -7.0673261e+00  -2.6893232e+00
   2.3785486e+01  -2.1868832e+01   2.0000000e+02   1.8144852e+00  -7.3273554e+00  -2.2380642e+00
   2.3654432e+01  -2.1826210e+01   2.0000000e+02   1.6227957e+00  -7.5919095e+00  -1.7928593e+00
   2.3521781e+01  -2.1788195e+01   2.0000000e+02   1.4026304e+00  -7.8667503e+00  -1.3471709e+00
   2.3387718e+01  -2.1754838e+01   2.0000000e+02   1.1626443e+00  -8.1547442e+00  -8.9277514e-01
   2.3252428e+01  -2.1726186e+01   2.0000000e+02   9.1167486e-01  -8.4558922e+00  -4.2095060e-01
   2.3116098e+01  -2.1702278e+01   2.0000000e+02   6.5843094e-01  -8.7677580e+00   7.6592885e-02
   2.2978918e+01  -2.1683149e+01   2.0000000e+02   4.1124192e-01  -9.0860797e+00   6.0717591e-01
   2.2841078e+01  -2.1668824e+01   2.0000000e+02   1.7777821e-01  -9.4053110e+00   1.1769873e+00
   2.2702767e+01  -2.1659323e+01   2.0000000e+02  -3.5190528e-02  -9.7189595e+00   1.7911334e+00
   2.2564176e+01  -2.1654660e+01   2.0000000e+02  -2.2201223e-01  -1.0019656e+01   2.4537037e+00
   2.2425496e+01  -2.1654840e+01   2.0000000e+02  -3.7829941e-01  -1.0299043e+01   3.1677281e+00
   2.2286920e+01  -2.1659864e+01   2.0000000e+02  -5.0091683e-01  -1.0547611e+01   3.9349118e+00
   2.2148637e+01  -2.1669725e+01   2.0000000e+02  -5.8787006e-01  -1.0754627e+01   4.7551620e+00
   2.2010839e+01  -2.1684408e+01   2.0000000e+02  -6.3804910e-01  -1.0908307e+01   5.6258778e+00
   2.1873716e+01  -2.1703895e+01   2.0000000e+02  -6.5089364e-01  -1.0996384e+01   6.5412846e+00
   2.1737458e+01  -2.1728157e+01   2.0000000e+02  -6.2609835e-01  -1.1007055e+01   7.4918618e+00
   2.1602252e+01  -2.1757160e+01   2.0000000e+02  -5.6331715e-01  -1.0930268e+01   8.4641963e+00
   2.1468288e+01  -2.1790866e+01   2.0000000e+02  -4.6197969e-01  -1.0759137e+01   9.4412853e+00
   2.1335749e+01  -2.1829227e+01   2.0000000e+02  -3.2127240e-01  -1.0491197e+01   1.0403497e+01
   2.1204822e+01  -2.1872189e+01   2.0000000e+02  -1.4018713e-01  -1.0129255e+01   1.1329907e+01
   2.1075688e+01  -2.1919694e+01   2.0000000e+02   8.2315348e-02  -9.6815547e+00   1.2200038e+01
   2.0948528e+01  -2.1971674e+01   2.0000000e+02   3.4704808e-01  -9.1612321e+00   1.2995442e+01
   2.0823520e+01  -2.2028059e+01   2.0000000e+02   6.5440341e-01  -8.5851297e+00   1.3701038e+01
   2.0700841e+01  -2.2088768e+01   2.0000000e+02   1.0041032e+00  -7.9722344e+00   1.4305811e+01
   2.0580663e+01  -2.2153718e+01   2.0000000e+02   1.3951075e+00  -7.3420258e+00   1.4802958e+01
   2.0463158e+01  -2.2222818e+01   2.0000000e+02   1.8254893e+00  -6.7130889e+00   1.5189390e+01
   2.0348491e+01  -2.2295971e+01   2.0000000e+02   2.2923724e+00  -6.1020797e+00   1.5464939e+01
   2.0236828e+01  -2.2373076e+01   2.0000000e+02   2.7918526e+00  -5.5232445e+00   1.5631395e+01
   2.0128329e+01  -2.2454024e+01   2.0000000e+02   3.3188307e+00  -4.9882662e+00   1.5691699e+01
   2.0023151e+01  -2.2538701e+01   2.0000000e+02   3.8668656e+00  -4.5064394e+00   1.5649412e+01
   1.9921446e+01  -2.2626990e+01   2.0000000e+02   4.4280517e+00  -4.0849247e+00   1.5508538e+01
   1.9823365e+01  -2.2718765e+01   2.0000000e+02   4.9929603e+00  -3.7289916e+00   1.5273702e+01
   1.9729052e+01  -2.2813897e+01   2.0000000e+02   5.5508644e+00  -3.4421050e+00   1.4950500e+01
   1.9638647e+01  -2.2912253e+01   2.0000000e+02   6.0901652e+00  -3.2259293e+00   1.4545895e+01
   1.9552286e+01  -2.3013693e+01   2.0000000e+02   6.5990356e+00  -3.0802400e+00   1.4068484e+01
   1.9470099e+01  -2.3118074e+01   2.0000000e+02   7.0662605e+00  -3.0028591e+00   1.3528478e+01
   1.9392212e+01  -2.3225247e+01   2.0000000e+02   7.4820701e+00  -2.9897017e+00   1.2937402e+01
   1.9318746e+01  -2.3335061e+01   2.0000000e+02   7.8389173e+00  -3.0349926e+00   1.2307488e+01
   1.9249816e+01  -2.3447358e+01   2.0000000e+02   8.1319880e+00  -3.1316351e+00   1.1650902e+01
   1.9185531e+01  -2.3561979e+01   2.0000000e+02   8.3594622e+00  -3.2717530e+00   1.0978826e+01
   1.9125995e+01  -2.3678760e+01   2.0000000e+02   8.5223575e+00  -3.4472682e+00   1.0300626e+01
   1.9071306e+01  -2.3797532e+01   2.0000000e+02   8.6240038e+00  -3.6504488e+00   9.6231866e+00
   1.9021554e+01  -2.3918126e+01   2.0000000e+02   8.6691825e+00  -3.8743470e+00   8.9505074e+00
   1.8976826e+01  -2.4040367e+01   2.0000000e+02   8.6630481e+00  -4.1130317e+00   8.2837869e+00
   1.8937199e+01  -2.4164080e+01   2.0000000e+02   8.6100205e+00  -4.3615959e+00   7.6218958e+00
   1.8902746e+01  -2.4289084e+01   2.0000000e+02   8.5129131e+00  -4.6159804e+00   6.9623016e+00
   1.8873531e+01  -2.4415198e+01   2.0000000e+02   8.3724511e+00  -4.8726720e+00   6.3021839e+00
   1.8849613e+01  -2.4542239e+01   2.0000000e+02   8.1873309e+00  -5.1283932e+00   5.6395947e+00
   1.8831043e+01  -2.4670020e+01   2.0000000e+02   7.9547637e+00  -5.3798486e+00   4.9744191e+00
   1.8817863e+01  -2.4798355e+01   2.0000000e+02   7.6713666e+00  -5.6236476e+00   4.3089014e+00
   1.8810111e+01  -2.4927055e+01   2.0000000e+02   7.3341972e+00  -5.8563962e+00   3.6477401e+00
   1.8807813e+01  -2.5055931e+01   2.0000000e+02   6.9416522e+00  -6.0748854e+00   2.9977977e+00
   1.8810992e+01  -2.5184791e+01   2.0000000e+02   6.4941687e+00  -6.2764101e+00   2.3674963e+00
   1.8819658e+01  -2.5313444e+01   2.0000000e+02   5.9945939e+00  -6.4590263e+00   1.7661363e+00
   1.8833818e+01  -2.5441700e+01   2.0000000e+02   5.4483570e+00  -6.6218283e+00   1.2030870e+00
   1.8853467e+01  -2.5569366e+01   2.0000000e+02   4.8634618e+00  -6.7650589e+00   6.8703628e-01
   1.8878595e+01  -2.5696251e+01   2.0000000e+02   4.2502879e+00  -6.8901710e+00   2.2502923e-01
   1.8909179e+01  -2.5822166e+01   2.0000000e+02   3.6211682e+00  -6.9996804e+00  -1.7847823e-01
   1.8945193e+01  -2.5946919e+01   2.0000000e+02   2.9896781e+00  -7.0969129e+00  -5.2265639e-01
   1.8986599e+01  -2.6070322e+01   2.0000000e+02   2.3695042e+00  -7.1855020e+00  -8.1104776e-01
   1.9033352e+01  -2.6192188e+01   2.0000000e+02   1.7730844e+00  -7.2687673e+00  -1.0519016e+00
   1.9085398e+01  -2.6312332e+01   2.0000000e+02   1.2101558e+00  -7.3489718e+00  -1.2577991e+00
   1.9142673e+01  -2.6430569e+01   2.0000000e+02   6.8653312e-01  -7.4266068e+00  -1.4445252e+00
   1.9205107e+01  -2.6546718e+01   2.0000000e+02   2.0335578e-01  -7.4998629e+00  -1.6293041e+00
   1.9272619e+01  -2.6660601e+01   2.0000000e+02  -2.4293993e-01  -7.5644098e+00  -1.8286029e+00
   1.9345121e+01  -2.6772041e+01   2.0000000e+02  -6.5991918e-01  -7.6136441e+00  -2.0559875e+00
   1.9422517e+01  -2.6880867e+01   2.0000000e+02  -1.0578437e+00  -7.6393760e+00  -2.3203374e+00
   1.9504699e+01  -2.6986910e+01   2.0000000e+02  -1.4479452e+00  -7.6329020e+00  -2.6247795e+00
   1.9591555e+01  -2.7090003e+01   2.0000000e+02  -1.8406362e+00  -7.5862954e+00  -2.9666065e+00
   1.9682962e+01  -2.7189986e+01   2.0000000e+02  -2.2439084e+00  -7.4936031e+00  -3.3380357e+00
   1.9778789e+01  -2.7286702e+01   2.0000000e+02  -2.6621602e+00  -7.3517505e+00  -3.7278456e+00
   1.9878898e+01  -2.7379999e+01   2.0000000e+02  -3.0956358e+00  -7.1608706e+00  -4.1234892e+00
   1.9983142e+01  -2.7469729e+01   2.0000000e+02  -3.5405083e+00  -6.9239458e+00  -4.5132873e+00
   2.0091368e+01  -2.7555751e+01   2.0000000e+02  -3.9895938e+00  -6.6457721e+00  -4.8882756e+00
   2.0203413e+01  -2.7637929e+01   2.0000000e+02  -4.4334959e+00  -6.3314641e+00  -5.2432454e+00
   2.0319108e+01  -2.7716131e+01   2.0000000e+02  -4.8619907e+00  -5.9848349e+00  -5.5767909e+00
   2.0438279e+01  -2.7790233e+01   2.0000000e+02  -5.2653538e+00  -5.6070740e+00  -5.8902640e+00
   2.0560741e+01  -2.7860116e+01   2.0000000e+02  -5.6353311e+00  -5.1961597e+00  -6.1859358e+00
   2.1165322e+01  -2.8262981e+01   2.0000000e+02  -7.0577215e+00  -2.6550478e+00  -6.7033091e+00
   2.1302850e+01  -2.8305387e+01   2.0000000e+02  -7.1550837e+00  -1.9943657e+00  -6.8505376e+00
   2.1442164e+01  -2.8343157e+01   2.0000000e+02  -7.2023540e+00  -1.2721440e+00  -6.9374916e+00
   2.1583055e+01  -2.8376234e+01   2.0000000e+02  -7.2019173e+00  -4.9176001e-01  -6.9505453e+00
   2.1725317e+01  -2.8404569e+01   2.0000000e+02  -7.1584353e+00   3.4136701e-01  -6.8756560e+00
   2.1868736e+01  -2.8428119e+01   2.0000000e+02  -7.0789779e+00   1.2191288e+00  -6.6981665e+00
   2.2013100e+01  -2.8446848e+01   2.0000000e+02  -6.9727286e+00   2.1295781e+00  -6.4031984e+00
   2.2158193e+01  -2.8460729e+01   2.0000000e+02  -6.8503009e+00   3.0555498e+00  -5.9771129e+00
   2.2303797e+01  -2.8469741e+01   2.0000000e+02  -6.7227742e+00   3.9739799e+00  -5.4101063e+00
   2.2449696e+01  -2.8473871e+01   2.0000000e+02  -6.6006500e+00   4.8565988e+00  -4.6993424e+00
   2.2595669e+01  -2.8473111e+01   2.0000000e+02  -6.4929248e+00   5.6722239e+00  -3.8517409e+00
   2.2741500e+01  -2.8467463e+01   2.0000000e+02  -6.4064037e+00   6.3904685e+00  -2.8852422e+00
   2.2886969e+01  -2.8456936e+01   2.0000000e+02  -6.3453521e+00   6.9857866e+00  -1.8281499e+00
   2.3031858e+01  -2.8441545e+01   2.0000000e+02  -6.3114546e+00   7.4409734e+00  -7.1640252e-01
   2.3175951e+01  -2.8421314e+01   2.0000000e+02  -6.3040192e+00   7.7491769e+00   4.1045873e-01
   2.3319033e+01  -2.8396273e+01   2.0000000e+02  -6.3203515e+00   7.9141331e+00   1.5136722e+00
   2.3460892e+01  -2.8366459e+01   2.0000000e+02  -6.3562243e+00   7.9487851e+00   2.5591554e+00
   2.3601315e+01  -2.8331918e+01   2.0000000e+02  -6.4064131e+00   7.8727655e+00   3.5202360e+00
   2.3740095e+01  -2.8292700e+01   2.0000000e+02  -6.4653034e+00   7.7093563e+00   4.3790476e+00
   2.3877028e+01  -2.8248866e+01   2.0000000e+02  -6.5274761e+00   7.4824962e+00   5.1265137e+00
   2.4011913e+01  -2.8200479e+01   2.0000000e+02  -6.5882960e+00   7.2143195e+00   5.7611898e+00
   2.4144550e+01  -2.8147613e+01   2.0000000e+02  -6.6443053e+00   6.9234777e+00   6.2874484e+00
   2.4274749e+01  -2.8090347e+01   2.0000000e+02  -6.6934632e+00   6.6243089e+00   6.7133931e+00
   2.4402319e+01  -2.8028764e+01   2.0000000e+02  -6.7351722e+00   6.3268317e+00   7.0487862e+00
   2.4527078e+01  -2.7962957e+01   2.0000000e+02  -6.7700577e+00   6.0372350e+00   7.3035022e+00
   2.4648847e+01  -2.7893024e+01   2.0000000e+02  -6.7996674e+00   5.7587533e+00   7.4863532e+00
   2.4767452e+01  -2.7819066e+01   2.0000000e+02  -6.8260644e+00   5.4926296e+00   7.6044841e+00
   2.4882727e+01  -2.7741195e+01   2.0000000e+02  -6.8513627e+00   5.2390070e+00   7.6632782e+00
   2.4994510e+01  -2.7659523e+01   2.0000000e+02  -6.8774017e+00   4.9977453e+00   7.6665240e+00
   2.5102647e+01  -2.7574171e+01   2.0000000e+02  -6.9054669e+00   4.7689494e+00   7.6169751e+00
   2.5206988e+01  -2.7485263e+01   2.0000000e+02  -6.9362722e+00   4.5532902e+00   7.5169409e+00
   2.5307391e+01  -2.7392930e+01   2.0000000e+02  -6.9700977e+00   4.3519697e+00   7.3688984e+00
   2.5403722e+01  -2.7297305e+01   2.0000000e+02  -7.0070979e+00   4.1664447e+00   7.1758124e+00
   2.5495852e+01  -2.7198528e+01   2.0000000e+02  -7.0475834e+00   3.9979598e+00   6.9411369e+00
   2.5583660e+01  -2.7096740e+01   2.0000000e+02  -7.0921371e+00   3.8470616e+00   6.6684287e+00
   2.5667033e+01  -2.6992090e+01   2.0000000e+02  -7.1414036e+00   3.7132523e+00   6.3608191e+00
   2.5745863e+01  -2.6884727e+01   2.0000000e+02  -7.1956000e+00   3.5949614e+00   6.0204909e+00
   2.5820052e+01  -2.6774804e+01   2.0000000e+02  -7.2538212e+00   3.4897668e+00   5.6485745e+00
   2.5889508e+01  -2.6662480e+01   2.0000000e+02  -7.3134544e+00   3.3948745e+00   5.2455136e+00
   2.5954147e+01  -2.6547913e+01   2.0000000e+02  -7.3699546e+00   3.3076507e+00   4.8118415e+00
   2.6013892e+01  -2.6431267e+01   2.0000000e+02  -7.4171382e+00   3.2260479e+00   4.3491992e+00
   2.6068675e+01  -2.6312706e+01   2.0000000e+02  -7.4480040e+00   3.1488257e+00   3.8611319e+00
   2.6118434e+01  -2.6192397e+01   2.0000000e+02  -7.4558607e+00   3.0755427e+00   3.3534486e+00
   2.6163116e+01  -2.6070510e+01   2.0000000e+02  -7.4354550e+00   3.0063592e+00   2.8339684e+00
   2.6202673e+01  -2.5947215e+01   2.0000000e+02  -7.3838022e+00   2.9417873e+00   2.3117144e+00
   2.6237069e+01  -2.5822683e+01   2.0000000e+02  -7.3005427e+00   2.8824472e+00   1.7958526e+00
   2.6266271e+01  -2.5697088e+01   2.0000000e+02  -7.1878415e+00   2.8289536e+00   1.2946266e+00
   2.6290256e+01  -2.5570605e+01   2.0000000e+02  -7.0499766e+00   2.7818628e+00   8.1451384e-01
   2.6309007e+01  -2.5443407e+01   2.0000000e+02  -6.8928149e+00   2.7416857e+00   3.5965330e-01
   2.6322517e+01  -2.5315670e+01   2.0000000e+02  -6.7233042e+00   2.7088550e+00  -6.8487791e-02
   2.6330782e+01  -2.5187569e+01   2.0000000e+02  -6.5489302e+00   2.6836173e+00  -4.7140339e-01
   2.6333808e+01  -2.5059280e+01   2.0000000e+02  -6.3770134e+00   2.6657874e+00  -8.5373684e-01
   2.6331608e+01  -2.4930976e+01   2.0000000e+02  -6.2137089e+00   2.6544247e+00  -1.2232780e+00
   2.6324201e+01  -2.4802834e+01   2.0000000e+02  -6.0627724e+00   2.6474736e+00  -1.5904612e+00
   2.6311613e+01  -2.4675025e+01   2.0000000e+02  -5.9243105e+00   2.6414426e+00  -1.9672469e+00
   2.6293876e+01  -2.4547724e+01   2.0000000e+02  -5.7939554e+00   2.6312228e+00  -2.3652815e+00
   2.6271031e+01  -2.4421101e+01   2.0000000e+02  -5.6627936e+00   2.6101135e+00  -2.7937037e+00
   2.6243123e+01  -2.4295326e+01   2.0000000e+02  -5.5182839e+00   2.5701409e+00  -3.2569789e+00
   2.6210204e+01  -2.4170568e+01   2.0000000e+02  -5.3460849e+00   2.5026614e+00  -3.7533242e+00
   2.6172332e+01  -2.4046993e+01   2.0000000e+02  -5.1324782e+00   2.3992100e+00  -4.2741621e+00
   2.6129572e+01  -2.3924766e+01   2.0000000e+02  -4.8668973e+00   2.2524542e+00  -4.8047921e+00
   2.6081993e+01  -2.3804049e+01   2.0000000e+02  -4.5439870e+00   2.0570589e+00  -5.3262570e+00
   2.6029673e+01  -2.3685003e+01   2.0000000e+02  -4.1647336e+00   1.8102699e+00  -5.8179930e+00
   2.5972691e+01  -2.3567783e+01   2.0000000e+02  -3.7363347e+00   1.5120747e+00  -6.2607724e+00
   2.5911136e+01  -2.3452546e+01   2.0000000e+02  -3.2709339e+00   1.1649685e+00  -6.6391587e+00
   2.5845100e+01  -2.3339442e+01   2.0000000e+02  -2.7834322e+00   7.7336760e-01  -6.9430933e+00
   2.5774679e+01  -2.3228620e+01   2.0000000e+02  -2.2890636e+00   3.4293585e-01  -7.1682123e+00
   2.5699977e+01  -2.3120225e+01   2.0000000e+02  -1.8012687e+00  -1.2002997e-01  -7.3150629e+00
   2.5621100e+01  -2.3014399e+01   2.0000000e+02  -1.3303077e+00  -6.0901902e-01  -7.3875875e+00
   2.5538160e+01  -2.2911279e+01   2.0000000e+02  -8.8282731e-01  -1.1174881e+00  -7.3913638e+00
   2.5451275e+01  -2.2810999e+01   2.0000000e+02  -4.6226544e-01  -1.6388554e+00  -7.3320873e+00
   2.5360563e+01  -2.2713691e+01   2.0000000e+02  -6.9791860e-02  -2.1664248e+00  -7.2145915e+00
   2.5266151e+01  -2.2619479e+01   2.0000000e+02   2.9450138e-01  -2.6932958e+00  -7.0424841e+00
   2.5168167e+01  -2.2528487e+01   2.0000000e+02   6.3052794e-01  -3.2123324e+00  -6.8183714e+00
   2.5066744e+01  -2.2440831e+01   2.0000000e+02   9.3740551e-01  -3.7162565e+00  -6.5444598e+00
   2.4962018e+01  -2.2356625e+01   2.0000000e+02   1.2130334e+00  -4.1978471e+00  -6.2233788e+00
   2.4854130e+01  -2.2275976e+01   2.0000000e+02   1.4540483e+00  -4.6503270e+00  -5.8589880e+00
   2.4743223e+01  -2.2198990e+01   2.0000000e+02   1.6561226e+00  -5.0679117e+00  -5.4570057e+00
   2.4629442e+01  -2.2125764e+01   2.0000000e+02   1.8145113e+00  -5.4465330e+00  -5.0252390e+00
   2.4512939e+01  -2.2056393e+01   2.0000000e+02   1.9247454e+00  -5.7845601e+00  -4.5733593e+00
   2.4393864e+01  -2.1990966e+01   2.0000000e+02   1.9833773e+00  -6.0834395e+00  -4.1120756e+00
   2.4272374e+01  -2.1929566e+01   2.0000000e+02   1.9885940e+00  -6.3479311e+00  -3.6519013e+00
   2.4148626e+01  -2.1872271e+01   2.0000000e+02   1.9406340e+00  -6.5858490e+00  -3.2016695e+00
   2.4022779e+01  -2.1819156e+01   2.0000000e+02   1.8419074e+00  -6.8072044e+00  -2.7671881e+00
   2.3894996e+01  -2.1770288e+01   2.0000000e+02   1.6968278e+00  -7.0228841e+00  -2.3503410e+00
   2.3765441e+01  -2.1725729e+01   2.0000000e+02   1.5114447e+00  -7.2431475e+00  -1.9488847e+00
   2.3634279e+01  -2.1685536e+01   2.0000000e+02   1.2929744e+00  -7.4762771e+00  -1.5569604e+00
   2.3501680e+01  -2.1649760e+01   2.0000000e+02   1.0493522e+00  -7.7276661e+00  -1.1661470e+00
   2.3367810e+01  -2.1618447e+01   2.0000000e+02   7.8885522e-01  -7.9995211e+00  -7.6669453e-01
   2.3232841e+01  -2.1591636e+01   2.0000000e+02   5.1983207e-01  -8.2910430e+00  -3.4869282e-01
   2.3096944e+01  -2.1569362e+01   2.0000000e+02   2.5047801e-01  -8.5989807e+00   9.7130907e-02
   2.2960291e+01  -2.1551654e+01   2.0000000e+02  -1.1384879e-02  -8.9182376e+00   5.7897186e-01
   2.2823057e+01  -2.1538532e+01   2.0000000e+02  -2.5855135e-01  -9.2423653e+00   1.1037922e+00
   2.2685413e+01  -2.1530015e+01   2.0000000e+02  -4.8466640e-01  -9.5638935e+00   1.6773559e+00
   2.2547535e+01  -2.1526113e+01   2.0000000e+02  -6.8444767e-01  -9.8743893e+00   2.3041806e+00
   2.2409597e+01  -2.1526832e+01   2.0000000e+02  -8.5381012e-01  -1.0164444e+01   2.9874502e+00
   2.2271773e+01  -2.1532169e+01   2.0000000e+02  -9.8988924e-01  -1.0423597e+01   3.7287043e+00
   2.2134238e+01  -2.1542118e+01   2.0000000e+02  -1.0909039e+00  -1.0640374e+01   4.5273789e+00
   2.1997165e+01  -2.1556667e+01   2.0000000e+02  -1.1559506e+00  -1.0802554e+01   5.3802416e+00
   2.1860729e+01  -2.1575798e+01   2.0000000e+02  -1.1847245e+00  -1.0897739e+01   6.2808037e+00
   2.1725102e+01  -2.1599485e+01   2.0000000e+02  -1.1772508e+00  -1.0914272e+01   7.2189558e+00
   2.1590456e+01  -2.1627699e+01   2.0000000e+02  -1.1336204e+00  -1.0842422e+01   8.1809235e+00
   2.1456963e+01  -2.1660403e+01   2.0000000e+02  -1.0538353e+00  -1.0675656e+01   9.1496856e+00
   2.1324792e+01  -2.1697557e+01   2.0000000e+02  -9.3769739e-01  -1.0411766e+01   1.0105951e+01
   2.1194112e+01  -2.1739113e+01   2.0000000e+02  -7.8481885e-01  -1.0053584e+01   1.1029491e+01
   2.1065091e+01  -2.1785018e+01   2.0000000e+02  -5.9467862e-01  -9.6091008e+00   1.1900735e+01
   2.0937892e+01  -2.1835213e+01   2.0000000e+02  -3.6675373e-01  -9.0908960e+00   1.2702307e+01
   2.0812680e+01  -2.1889635e+01   2.0000000e+02  -1.0066857e-01  -8.5150378e+00   1.3420168e+01
   2.0689616e+01  -2.1948213e+01   2.0000000e+02   2.0362196e-01  -7.8995964e+00   1.4044297e+01
   2.0568860e+01  -2.2010874e+01   2.0000000e+02   5.4572316e-01  -7.2631345e+00   1.4568752e+01
   2.0450568e+01  -2.2077536e+01   2.0000000e+02   9.2465915e-01  -6.6233750e+00   1.4991223e+01
   2.0334895e+01  -2.2148115e+01   2.0000000e+02   1.3388310e+00  -5.9962764e+00   1.5312243e+01
   2.0221992e+01  -2.2222520e+01   2.0000000e+02   1.7859094e+00  -5.3955081e+00   1.5534248e+01
   2.0112007e+01  -2.2300655e+01   2.0000000e+02   2.2627343e+00  -4.8323351e+00   1.5660700e+01
   2.0005087e+01  -2.2382421e+01   2.0000000e+02   2.7651742e+00  -4.3157796e+00   1.5695427e+01
   1.9901373e+01  -2.2467711e+01   2.0000000e+02   3.2879097e+00  -3.8528756e+00   1.5642254e+01
   1.9801004e+01  -2.2556416e+01   2.0000000e+02   3.8243194e+00  -3.4489745e+00   1.5504974e+01
   1.9704116e+01  -2.2648422e+01   2.0000000e+02   4.3664094e+00  -3.1079316e+00   1.5287569e+01
   1.9610841e+01  -2.2743609e+01   2.0000000e+02   4.9049309e+00  -2.8321652e+00   1.4994594e+01
   1.9521305e+01  -2.2841855e+01   2.0000000e+02   5.4297452e+00  -2.6226097e+00   1.4631564e+01
   1.9435633e+01  -2.2943031e+01   2.0000000e+02   5.9303369e+00  -2.4786352e+00   1.4205242e+01
   1.9353944e+01  -2.3047007e+01   2.0000000e+02   6.3965259e+00  -2.3979740e+00   1.3723676e+01
   1.9276353e+01  -2.3153647e+01   2.0000000e+02   6.8191578e+00  -2.3767625e+00   1.3196035e+01
   1.9202970e+01  -2.3262812e+01   2.0000000e+02   7.1907823e+00  -2.4097343e+00   1.2632183e+01
   1.9133901e+01  -2.3374359e+01   2.0000000e+02   7.5061617e+00  -2.4905659e+00   1.2042112e+01
   1.9069247e+01  -2.3488141e+01   2.0000000e+02   7.7625594e+00  -2.6123300e+00   1.1435269e+01
   1.9009104e+01  -2.3604011e+01   2.0000000e+02   7.9597651e+00  -2.7680122e+00   1.0819872e+01
   1.8953562e+01  -2.3721815e+01   2.0000000e+02   8.0997707e+00  -2.9509508e+00   1.0202352e+01
   1.8902707e+01  -2.3841398e+01   2.0000000e+02   8.1862054e+00  -3.1552154e+00   9.5869274e+00
   1.8856619e+01  -2.3962601e+01   2.0000000e+02   8.2234923e+00  -3.3757724e+00   8.9754822e+00
   1.8815371e+01  -2.4085264e+01   2.0000000e+02   8.2159121e+00  -3.6084843e+00   8.3677569e+00
   1.8779032e+01  -2.4209225e+01   2.0000000e+02   8.1667312e+00  -3.8499447e+00   7.7618902e+00
   1.8747664e+01  -2.4334317e+01   2.0000000e+02   8.0775605e+00  -4.0971788e+00   7.1552534e+00
   1.8721324e+01  -2.4460373e+01   2.0000000e+02   7.9481154e+00  -4.3473709e+00   6.5453683e+00
   1.8700062e+01  -2.4587226e+01   2.0000000e+02   7.7763965e+00  -4.5976232e+00   5.9308222e+00
   1.8683922e+01  -2.4714703e+01   2.0000000e+02   7.5592774e+00  -4.8448398e+00   5.3119999e+00
   1.8672941e+01  -2.4842634e+01   2.0000000e+02   7.2933177e+00  -5.0857863e+00   4.6914159e+00
   1.8667150e+01  -2.4970845e+01   2.0000000e+02   6.9756555e+00  -5.3172341e+00   4.0737736e+00
   1.8666572e+01  -2.5099163e+01   2.0000000e+02   6.6047668e+00  -5.5361902e+00   3.4656748e+00
   1.8671226e+01  -2.5227412e+01   2.0000000e+02   6.1810500e+00  -5.7401465e+00   2.8751519e+00
   1.8681121e+01  -2.5355419e+01   2.0000000e+02   5.7071501e+00  -5.9272748e+00   2.3110925e+00
   1.8696260e+01  -2.5483007e+01   2.0000000e+02   5.1881698e+00  -6.0965979e+00   1.7826090e+00
   1.8716639e+01  -2.5610002e+01   2.0000000e+02   4.6316841e+00  -6.2480992e+00   1.2982777e+00
   1.8742248e+01  -2.5736228e+01   2.0000000e+02   4.0476394e+00  -6.3827581e+00   8.6528453e-01
   1.8773067e+01  -2.5861510e+01   2.0000000e+02   3.4479796e+00  -6.5024834e+00   4.8844810e-01
   1.8809070e+01  -2.5985676e+01   2.0000000e+02   2.8459436e+00  -6.6099549e+00   1.6920221e-01
   1.8850225e+01  -2.6108553e+01   2.0000000e+02   2.2550310e+00  -6.7083005e+00  -9.5203265e-02
   1.8896490e+01  -2.6229968e+01   2.0000000e+02   1.6876669e+00  -6.8006058e+00  -3.1206811e-01
   1.8947817e+01  -2.6349751e+01   2.0000000e+02   1.1537708e+00  -6.8893285e+00  -4.9302213e-01
   1.9004149e+01  -2.6467735e+01   2.0000000e+02   6.5952401e-01  -6.9756475e+00  -6.5306602e-01
   1.9065423e+01  -2.6583752e+01   2.0000000e+02   2.0658512e-01  -7.0589199e+00  -8.0902516e-01
   1.9131567e+01  -2.6697639e+01   2.0000000e+02  -2.0810507e-01  -7.1363299e+00  -9.7755238e-01
   1.9202504e+01  -2.6809234e+01   2.0000000e+02  -5.9180582e-01  -7.2029093e+00  -1.1730841e+00
   1.9278145e+01  -2.6918377e+01   2.0000000e+02  -9.5485739e-01  -7.2519221e+00  -1.4059826e+00
   1.9358398e+01  -2.7024914e+01   2.0000000e+02  -1.3091564e+00  -7.2756725e+00  -1.6813159e+00
   1.9443161e+01  -2.7128690e+01   2.0000000e+02  -1.6664013e+00  -7.2665604e+00  -1.9983444e+00
   1.9532325e+01  -2.7229558e+01   2.0000000e+02  -2.0364589e+00  -7.2182322e+00  -2.3509019e+00
   1.9625774e+01  -2.7327370e+01   2.0000000e+02  -2.4259948e+00  -7.1266168e+00  -2.7286194e+00
   1.9723385e+01  -2.7421987e+01   2.0000000e+02  -2.8376336e+00  -6.9905488e+00  -3.1187590e+00
   1.9825027e+01  -2.7513269e+01   2.0000000e+02  -3.2696763e+00  -6.8118703e+00  -3.5084138e+00
   1.9930563e+01  -2.7601086e+01   2.0000000e+02  -3.7164934e+00  -6.5948301e+00  -3.8866209e+00
   2.0039849e+01  -2.7685307e+01   2.0000000e+02  -4.1694115e+00  -6.3449365e+00  -4.2460068e+00
   2.0152735e+01  -2.7765810e+01   2.0000000e+02  -4.6180231e+00  -6.0673758e+00  -4.5835331e+00
   2.0269062e+01  -2.7842477e+01   2.0000000e+02  -5.0515721e+00  -5.7654495e+00  -4.9001838e+00
   2.0388669e+01  -2.7915196e+01   2.0000000e+02  -5.4602102e+00  -5.4393750e+00  -5.1996579e+00
   2.0511386e+01  -2.7983857e+01   2.0000000e+02  -5.8357961e+00  -5.0858555e+00  -5.4863179e+00
   2.0637038e+01  -2.8048361e+01   2.0000000e+02  -6.1722166e+00  -4.6985226e+00  -5.7629944e+00
   2.0765445e+01  -2.8108612e+01   2.0000000e+02  -6.4651709e+00  -4.2692124e+00  -6.0292929e+00
   2.0896422e+01  -2.8164520e+01   2.0000000e+02  -6.7116979e+00  -3.7896430e+00  -6.2807701e+00
   2.1029779e+01  -2.8216002e+01   2.0000000e+02  -6.9097011e+00  -3.2530103e+00  -6.5091472e+00
   2.1696587e+01  -2.8530550e+01   2.0000000e+02  -7.3959299e+00   5.1110114e-02  -6.3957401e+00
   2.1840388e+01  -2.8554221e+01   2.0000000e+02  -7.2950489e+00   9.0244392e-01  -6.2832642e+00
   2.1985113e+01  -2.8573223e+01   2.0000000e+02  -7.1593424e+00   1.7980114e+00  -6.0569006e+00
   2.2130560e+01  -2.8587531e+01   2.0000000e+02  -6.9988198e+00   2.7217653e+00  -5.6992802e+00
   2.2276525e+01  -2.8597124e+01   2.0000000e+02  -6.8244275e+00   3.6508615e+00  -5.1963032e+00
   2.2422804e+01  -2.8601989e+01   2.0000000e+02  -6.6471600e+00   4.5560981e+00  -4.5407008e+00
   2.2569191e+01  -2.8602118e+01   2.0000000e+02  -6.4772028e+00   5.4041621e+00  -3.7353415e+00
   2.2715481e+01  -2.8597512e+01   2.0000000e+02  -6.3232119e+00   6.1614402e+00  -2.7950772e+00
   2.2861468e+01  -2.8588178e+01   2.0000000e+02  -6.1918021e+00   6.7984596e+00  -1.7464633e+00
   2.3006949e+01  -2.8574127e+01   2.0000000e+02  -6.0872672e+00   7.2938605e+00  -6.2522652e-01
   2.3151719e+01  -2.8555381e+01   2.0000000e+02  -6.0115140e+00   7.6368878e+00   5.2779268e-01
   2.3295575e+01  -2.8531965e+01   2.0000000e+02  -5.9641949e+00   7.8280710e+00   1.6713052e+00
   2.3438319e+01  -2.8503913e+01   2.0000000e+02  -5.9429775e+00   7.8781171e+00   2.7678610e+00
   2.3579750e+01  -2.8471263e+01   2.0000000e+02  -5.9439792e+00   7.8055401e+00   3.7869361e+00
   2.3719672e+01  -2.8434062e+01   2.0000000e+02  -5.9622846e+00   7.6336454e+00   4.7067799e+00
   2.3857891e+01  -2.8392362e+01   2.0000000e+02  -5.9925831e+00   7.3874481e+00   5.5147554e+00
   2.3994218e+01  -2.8346222e+01   2.0000000e+02  -6.0298012e+00   7.0909838e+00   6.2065657e+00
   2.4128466e+01  -2.8295705e+01   2.0000000e+02  -6.0696835e+00   6.7653425e+00   6.7846008e+00
   2.4260450e+01  -2.8240882e+01   2.0000000e+02  -6.1091792e+00   6.4275267e+00   7.2559187e+00
   2.4389991e+01  -2.8181830e+01   2.0000000e+02  -6.1466275e+00   6.0901006e+00   7.6301954e+00
   2.4516915e+01  -2.8118631e+01   2.0000000e+02  -6.1817220e+00   5.7614933e+00   7.9179178e+00
   2.4641050e+01  -2.8051372e+01   2.0000000e+02  -6.2152911e+00   5.4467199e+00   8.1290192e+00
   2.4762232e+01  -2.7980147e+01   2.0000000e+02  -6.2489207e+00   5.1482525e+00   8.2720482e+00
   2.4880300e+01  -2.7905054e+01   2.0000000e+02  -6.2845429e+00   4.8669579e+00   8.3537302e+00
   2.4995099e+01  -2.7826197e+01   2.0000000e+02  -6.3239769e+00   4.6029085e+00   8.3789742e+00
   2.5106478e+01  -2.7743684e+01   2.0000000e+02  -6.3685561e+00   4.3560693e+00   8.3511752e+00
   2.5214294e+01  -2.7657628e+01   2.0000000e+02  -6.4188836e+00   4.1267469e+00   8.2727924e+00
   2.5318409e+01  -2.7568147e+01   2.0000000e+02  -6.4748319e+00   3.9158090e+00   8.1460255e+00
   2.5418691e+01  -2.7475363e+01   2.0000000e+02  -6.5357866e+00   3.7245962e+00   7.9734339e+00
   2.5515015e+01  -2.7379402e+01   2.0000000e+02  -6.6010628e+00   3.5545623e+00   7.7582888e+00
   2.5607260e+01  -2.7280395e+01   2.0000000e+02  -6.6703401e+00   3.4067653e+00   7.5045068e+00
   2.5695315e+01  -2.7178474e+01   2.0000000e+02  -6.7438943e+00   3.2813373e+00   7.2161590e+00
   2.5779072e+01  -2.7073779e+01   2.0000000e+02  -6.8224627e+00   3.1771672e+00   6.8967563e+00
   2.5858433e+01  -2.6966448e+01   2.0000000e+02  -6.9067151e+00   3.0918675e+00   6.5485448e+00
   2.5933304e+01  -2.6856627e+01   2.0000000e+02  -6.9964276e+00   3.0220741e+00   6.1722474e+00
   2.6003599e+01  -2.6744461e+01   2.0000000e+02  -7.0896772e+00   2.9639737e+00   5.7673256e+00
   2.6069240e+01  -2.6630099e+01   2.0000000e+02  -7.1823437e+00   2.9138864e+00   5.3328640e+00
   2.6130153e+01  -2.6513695e+01   2.0000000e+02  -7.2681948e+00   2.8687595e+00   4.8687544e+00
   2.6186274e+01  -2.6395400e+01   2.0000000e+02  -7.3395984e+00   2.8264152e+00   4.3767820e+00
   2.6237544e+01  -2.6275372e+01   2.0000000e+02  -7.3886850e+00   2.7855580e+00   3.8613317e+00
   2.6283911e+01  -2.6153767e+01   2.0000000e+02  -7.4086628e+00   2.7455910e+00   3.3293488e+00
   2.6325330e+01  -2.6030745e+01   2.0000000e+02  -7.3948995e+00   2.7063534e+00   2.7897094e+00
   2.6361764e+01  -2.5906467e+01   2.0000000e+02  -7.3455356e+00   2.6679079e+00   2.2521218e+00
   2.6393181e+01  -2.5781093e+01   2.0000000e+02  -7.2615481e+00   2.6304512e+00   1.7259323e+00
   2.6419557e+01  -2.5654786e+01   2.0000000e+02  -7.1463953e+00   2.5943384e+00   1.2191588e+00
   2.6440874e+01  -2.5527710e+01   2.0000000e+02  -7.0054709e+00   2.5601828e+00   7.3782371e-01
   2.6457122e+01  -2.5400027e+01   2.0000000e+02  -6.8455650e+00   2.5289255e+00   2.8556851e-01
   2.6468295e+01  -2.5271901e+01   2.0000000e+02  -6.6744038e+00   2.5018011e+00  -1.3659273e-01
   2.6474395e+01  -2.5143497e+01   2.0000000e+02  -6.5001437e+00   2.4801351e+00  -5.3054801e-01
   2.6475432e+01  -2.5014978e+01   2.0000000e+02  -6.3306329e+00   2.4649881e+00  -9.0134447e-01
   2.6471419e+01  -2.4886507e+01   2.0000000e+02  -6.1723489e+00   2.4566962e+00  -1.2571912e+00
   2.6462377e+01  -2.4758246e+01   2.0000000e+02  -6.0291006e+00   2.4543674e+00  -1.6089461e+00
   2.6448333e+01  -2.4630359e+01   2.0000000e+02  -5.9008141e+00   2.4554501e+00  -1.9688961e+00
   2.6429320e+01  -2.4503005e+01   2.0000000e+02  -5.7827885e+00   2.4554607e+00  -2.3489216e+00
   2.6405378e+01  -2.4376344e+01   2.0000000e+02  -5.6657814e+00   2.4479737e+00  -2.7582881e+00
   2.6376549e+01  -2.4250535e+01   2.0000000e+02  -5.5370336e+00   2.4249482e+00  -3.2015915e+00
   2.6342885e+01  -2.4125735e+01   2.0000000e+02  -5.3821444e+00   2.3773895e+00  -3.6772982e+00
   2.6304441e+01  -2.4002099e+01   2.0000000e+02  -5.1874661e+00   2.2963014e+00  -4.1772925e+00
   2.6261278e+01  -2.3879780e+01   2.0000000e+02  -4.9425521e+00   2.1737442e+00  -4.6875889e+00
   2.6213463e+01  -2.3758931e+01   2.0000000e+02  -4.6421403e+00   2.0037954e+00  -5.1901468e+00
   2.6161066e+01  -2.3639699e+01   2.0000000e+02  -4.2871843e+00   1.7831791e+00  -5.6654902e+00
   2.6104165e+01  -2.3522232e+01   2.0000000e+02  -3.8847234e+00   1.5114558e+00  -6.0954875e+00
   2.6042840e+01  -2.3406674e+01   2.0000000e+02  -3.4465373e+00   1.1907322e+00  -6.4657808e+00
   2.5977179e+01  -2.3293167e+01   2.0000000e+02  -2.9869994e+00   8.2505550e-01  -6.7672200e+00
   2.5907270e+01  -2.3181849e+01   2.0000000e+02  -2.5206162e+00   4.1967041e-01  -6.9961295e+00
   2.5833210e+01  -2.3072856e+01   2.0000000e+02  -2.0599432e+00  -1.9594743e-02  -7.1534230e+00
   2.5755099e+01  -2.2966321e+01   2.0000000e+02  -1.6142372e+00  -4.8673175e-01  -7.2430324e+00
   2.5673039e+01  -2.2862374e+01   2.0000000e+02  -1.1890802e+00  -9.7568985e-01  -7.2701246e+00
   2.5587139e+01  -2.2761140e+01   2.0000000e+02  -7.8687546e-01  -1.4803150e+00  -7.2395908e+00
   2.5497509e+01  -2.2662741e+01   2.0000000e+02  -4.0788061e-01  -1.9942193e+00  -7.1551260e+00
   2.5404267e+01  -2.2567298e+01   2.0000000e+02  -5.1466637e-02  -2.5106417e+00  -7.0189649e+00
   2.5307530e+01  -2.2474924e+01   2.0000000e+02   2.8279680e-01  -3.0224513e+00  -6.8321778e+00
   2.5207421e+01  -2.2385731e+01   2.0000000e+02   5.9431293e-01  -3.5221685e+00  -6.5953659e+00
   2.5104067e+01  -2.2299826e+01   2.0000000e+02   8.8105665e-01  -4.0021494e+00  -6.3095302e+00
   2.4997595e+01  -2.2217313e+01   2.0000000e+02   1.1395425e+00  -4.4548873e+00  -5.9769493e+00
   2.4888140e+01  -2.2138290e+01   2.0000000e+02   1.3650718e+00  -4.8734618e+00  -5.6019182e+00
   2.4775834e+01  -2.2062851e+01   2.0000000e+02   1.5522544e+00  -5.2521992e+00  -5.1911788e+00
   2.4660818e+01  -2.1991088e+01   2.0000000e+02   1.6956351e+00  -5.5874264e+00  -4.7539638e+00
   2.4543230e+01  -2.1923085e+01   2.0000000e+02   1.7904268e+00  -5.8783055e+00  -4.3014490e+00
   2.4423215e+01  -2.1858924e+01   2.0000000e+02   1.8331691e+00  -6.1274136e+00  -3.8457452e+00
   2.4300916e+01  -2.1798682e+01   2.0000000e+02   1.8222624e+00  -6.3409561e+00  -3.3984157e+00
   2.4176483e+01  -2.1742429e+01   2.0000000e+02   1.7582443e+00  -6.5283563e+00  -2.9688967e+00
   2.4050064e+01  -2.1690233e+01   2.0000000e+02   1.6438096e+00  -6.7012597e+00  -2.5630983e+00
   2.3921812e+01  -2.1642156e+01   2.0000000e+02   1.4835609e+00  -6.8720628e+00  -2.1825622e+00
   2.3791878e+01  -2.1598255e+01   2.0000000e+02   1.2835970e+00  -7.0523108e+00  -1.8243379e+00
   2.3660419e+01  -2.1558582e+01   2.0000000e+02   1.0510515e+00  -7.2512825e+00  -1.4816172e+00
   2.3527589e+01  -2.1523184e+01   2.0000000e+02   7.9366438e-01  -7.4750983e+00  -1.1448420e+00
   2.3393548e+01  -2.1492103e+01   2.0000000e+02   5.1946826e-01  -7.7264011e+00  -8.0303124e-01
   2.3258453e+01  -2.1465376e+01   2.0000000e+02   2.3654334e-01  -8.0045998e+00  -4.4493157e-01
   2.3122465e+01  -2.1443035e+01   2.0000000e+02  -4.7160471e-02  -8.3063934e+00  -5.9875118e-02
   2.2985743e+01  -2.1425105e+01   2.0000000e+02  -3.2403168e-01  -8.6263973e+00   3.6175353e-01
   2.2848449e+01  -2.1411609e+01   2.0000000e+02  -5.8699948e-01  -8.9576549e+00   8.2829490e-01
   2.2710745e+01  -2.1402561e+01   2.0000000e+02  -8.2979818e-01  -9.2919687e+00   1.3467327e+00
   2.2572793e+01  -2.1397974e+01   2.0000000e+02  -1.0471611e+00  -9.6200797e+00   1.9226237e+00
   2.2434756e+01  -2.1397852e+01   2.0000000e+02  -1.2349816e+00  -9.9317045e+00   2.5599160e+00
   2.2296795e+01  -2.1402195e+01   2.0000000e+02  -1.3903324e+00  -1.0215576e+01   3.2606833e+00
   2.2159073e+01  -2.1410999e+01   2.0000000e+02  -1.5113689e+00  -1.0459529e+01   4.0246944e+00
   2.2021753e+01  -2.1424252e+01   2.0000000e+02  -1.5971595e+00  -1.0650772e+01   4.8489149e+00
   2.1884995e+01  -2.1441940e+01   2.0000000e+02  -1.6474296e+00  -1.0776420e+01   5.7270556e+00
   2.1748963e+01  -2.1464041e+01   2.0000000e+02  -1.6623309e+00  -1.0824310e+01   6.6491746e+00
   2.1613815e+01  -2.1490528e+01   2.0000000e+02  -1.6422265e+00  -1.0784092e+01   7.6017092e+00
   2.1479712e+01  -2.1521372e+01   2.0000000e+02  -1.5875084e+00  -1.0648433e+01   8.5678272e+00
   2.1346812e+01  -2.1556535e+01   2.0000000e+02  -1.4985121e+00  -1.0414125e+01   9.5283268e+00
   2.1215274e+01  -2.1595975e+01   2.0000000e+02  -1.3754312e+00  -1.0082861e+01   1.0462943e+01
   2.1085253e+01  -2.1639647e+01   2.0000000e+02  -1.2182940e+00  -9.6614439e+00   1.1351943e+01
   2.0956904e+01  -2.1687497e+01   2.0000000e+02  -1.0270114e+00  -9.1613524e+00   1.2177618e+01
   2.0830381e+01  -2.1739469e+01   2.0000000e+02  -8.0142173e-01  -8.5977293e+00   1.2925555e+01
   2.0705835e+01  -2.1795501e+01   2.0000000e+02  -5.4141505e-01  -7.9879676e+00   1.3585364e+01
   2.0583416e+01  -2.1855528e+01   2.0000000e+02  -2.4704802e-01  -7.3502119e+00   1.4150844e+01
   2.0463272e+01  -2.1919476e+01   2.0000000e+02   8.1304341e-02  -6.7020083e+00   1.4619602e+01
   2.0345548e+01  -2.1987271e+01   2.0000000e+02   4.4288612e-01  -6.0592957e+00   1.4992350e+01
   2.0230387e+01  -2.2058831e+01   2.0000000e+02   8.3643967e-01  -5.4358308e+00   1.5271965e+01
   2.0117930e+01  -2.2134070e+01   2.0000000e+02   1.2601456e+00  -4.8430000e+00   1.5462569e+01
   2.0008315e+01  -2.2212900e+01   2.0000000e+02   1.7115358e+00  -4.2899235e+00   1.5568753e+01
   1.9901677e+01  -2.2295225e+01   2.0000000e+02   2.1873227e+00  -3.7837374e+00   1.5594996e+01
   1.9798149e+01  -2.2380947e+01   2.0000000e+02   2.6832627e+00  -3.3299268e+00   1.5545395e+01
   1.9697859e+01  -2.2469962e+01   2.0000000e+02   3.1939698e+00  -2.9325931e+00   1.5423641e+01
   1.9600935e+01  -2.2562165e+01   2.0000000e+02   3.7128559e+00  -2.5946516e+00   1.5233242e+01
   1.9507498e+01  -2.2657444e+01   2.0000000e+02   4.2321352e+00  -2.3178499e+00   1.4977862e+01
   1.9417668e+01  -2.2755684e+01   2.0000000e+02   4.7430788e+00  -2.1027445e+00   1.4661717e+01
   1.9331561e+01  -2.2856766e+01   2.0000000e+02   5.2364129e+00  -1.9485914e+00   1.4289873e+01
   1.9249288e+01  -2.2960568e+01   2.0000000e+02   5.7028640e+00  -1.8532743e+00   1.3868381e+01
   1.9170958e+01  -2.3066965e+01   2.0000000e+02   6.1337644e+00  -1.8133368e+00   1.3404232e+01
   1.9096674e+01  -2.3175827e+01   2.0000000e+02   6.5216174e+00  -1.8241198e+00   1.2905121e+01
   1.9026536e+01  -2.3287021e+01   2.0000000e+02   6.8606088e+00  -1.8800677e+00   1.2379070e+01
   1.8960640e+01  -2.3400412e+01   2.0000000e+02   7.1469576e+00  -1.9751266e+00   1.1833960e+01
   1.8899076e+01  -2.3515861e+01   2.0000000e+02   7.3790583e+00  -2.1031722e+00   1.1277034e+01
   1.8841930e+01  -2.3633227e+01   2.0000000e+02   7.5574211e+00  -2.2584298e+00   1.0714401e+01
   1.8789285e+01  -2.3752366e+01   2.0000000e+02   7.6843455e+00  -2.4357806e+00   1.0150628e+01
   1.8741217e+01  -2.3873132e+01   2.0000000e+02   7.7633445e+00  -2.6309066e+00   9.5884651e+00
   1.8697798e+01  -2.3995374e+01   2.0000000e+02   7.7983978e+00  -2.8402799e+00   9.0287971e+00
   1.8659095e+01  -2.4118942e+01   2.0000000e+02   7.7931373e+00  -3.0610215e+00   8.4708213e+00
   1.8625168e+01  -2.4243682e+01   2.0000000e+02   7.7500918e+00  -3.2906247e+00   7.9125473e+00
   1.8596073e+01  -2.4369440e+01   2.0000000e+02   7.6701919e+00  -3.5267082e+00   7.3514644e+00
   1.8571862e+01  -2.4496058e+01   2.0000000e+02   7.5526073e+00  -3.7667874e+00   6.7853616e+00
   1.8552579e+01  -2.4623378e+01   2.0000000e+02   7.3949640e+00  -4.0081561e+00   6.2130902e+00
   1.8538262e+01  -2.4751241e+01   2.0000000e+02   7.1939116e+00  -4.2479033e+00   5.6351710e+00
   1.8528946e+01  -2.4879485e+01   2.0000000e+02   6.9459014e+00  -4.4830380e+00   5.0541309e+00
   1.8524657e+01  -2.5007949e+01   2.0000000e+02   6.6479818e+00  -4.7106416e+00   4.4745422e+00
   1.8525417e+01  -2.5136470e+01   2.0000000e+02   6.2985267e+00  -4.9280653e+00   3.9028022e+00
   1.8531240e+01  -2.5264884e+01   2.0000000e+02   5.8977654e+00  -5.1330700e+00   3.3467435e+00
   1.8542136e+01  -2.5393029e+01   2.0000000e+02   5.4481334e+00  -5.3239706e+00   2.8150945e+00
   1.8558106e+01  -2.5520741e+01   2.0000000e+02   4.9544867e+00  -5.4997000e+00   2.3169116e+00
   1.8579146e+01  -2.5647854e+01   2.0000000e+02   4.4241860e+00  -5.6599086e+00   1.8608337e+00
   1.8605246e+01  -2.5774207e+01   2.0000000e+02   3.8669701e+00  -5.8050193e+00   1.4541926e+00
   1.8636388e+01  -2.5899636e+01   2.0000000e+02   3.2946359e+00  -5.9362293e+00   1.1020546e+00
   1.8672548e+01  -2.6023979e+01   2.0000000e+02   2.7203247e+00  -6.0554573e+00   8.0620354e-01
   1.8713696e+01  -2.6147074e+01   2.0000000e+02   2.1574801e+00  -6.1651577e+00   5.6434276e-01
   1.8759793e+01  -2.6268760e+01   2.0000000e+02   1.6185239e+00  -6.2679773e+00   3.6971506e-01
   1.8810796e+01  -2.6388879e+01   2.0000000e+02   1.1134469e+00  -6.3663043e+00   2.1126900e-01
   1.8866653e+01  -2.6507272e+01   2.0000000e+02   6.4859575e-01  -6.4616961e+00   7.4516051e-02
   1.8927306e+01  -2.6623784e+01   2.0000000e+02   2.2582493e-01  -6.5543394e+00  -5.7057897e-02
   1.8992690e+01  -2.6738261e+01   2.0000000e+02  -1.5774029e-01  -6.6426304e+00  -2.0016032e-01
   1.9062733e+01  -2.6850551e+01   2.0000000e+02  -5.0931592e-01  -6.7230039e+00  -3.6971968e-01
   1.9137356e+01  -2.6960505e+01   2.0000000e+02  -8.3947725e-01  -6.7900981e+00  -5.7706780e-01
   1.9216473e+01  -2.7067975e+01   2.0000000e+02  -1.1607240e+00  -6.8372880e+00  -8.2856316e-01
   1.9299993e+01  -2.7172819e+01   2.0000000e+02  -1.4858236e+00  -6.8575289e+00  -1.1248713e+00
   1.9387815e+01  -2.7274895e+01   2.0000000e+02  -1.8261126e+00  -6.8443967e+00  -1.4610130e+00
   1.9479834e+01  -2.7374065e+01   2.0000000e+02  -2.1900500e+00  -6.7931516e+00  -1.8272674e+00
   1.9575937e+01  -2.7470196e+01   2.0000000e+02  -2.5821518e+00  -6.7015691e+00  -2.2107441e+00
   1.9676006e+01  -2.7563157e+01   2.0000000e+02  -3.0024782e+00  -6.5703701e+00  -2.5974928e+00
   1.9779915e+01  -2.7652821e+01   2.0000000e+02  -3.4467329e+00  -6.4030415e+00  -2.9747357e+00
   1.9887532e+01  -2.7739068e+01   2.0000000e+02  -3.9069736e+00  -6.2050243e+00  -3.3328761e+00
   1.9998720e+01  -2.7821778e+01   2.0000000e+02  -4.3727778e+00  -5.9823884e+00  -3.6668581e+00
   2.0113335e+01  -2.7900838e+01   2.0000000e+02  -4.8326875e+00  -5.7401864e+00  -3.9764961e+00
   2.0231228e+01  -2.7976139e+01   2.0000000e+02  -5.2756167e+00  -5.4809365e+00  -4.2657277e+00
   2.0352244e+01  -2.8047578e+01   2.0000000e+02  -5.6919457e+00  -5.2035951e+00  -4.5408681e+00
   2.0476222e+01  -2.8115056e+01   2.0000000e+02  -6.0740857e+00  -4.9033593e+00  -4.8083315e+00
   2.0602998e+01  -2.8178480e+01   2.0000000e+02  -6.4164828e+00  -4.5723609e+00  -5.0724004e+00
   2.0732401e+01  -2.8237761e+01   2.0000000e+02  -6.7151556e+00  -4.2011018e+00  -5.3336137e+00
   2.0864256e+01  -2.8292817e+01   2.0000000e+02  -6.9670807e+00  -3.7801731e+00  -5.5881666e+00
   2.0998384e+01  -2.8343571e+01   2.0000000e+02  -7.1696892e+00  -3.3017765e+00  -5.8283288e+00
   2.1134602e+01  -2.8389953e+01   2.0000000e+02  -7.3207206e+00  -2.7606277e+00  -6.0435079e+00
   2.1272723e+01  -2.8431898e+01   2.0000000e+02  -7.4184797e+00  -2.1541231e+00  -6.2214386e+00
   2.1412557e+01  -2.8469346e+01   2.0000000e+02  -7.4624020e+00  -1.4819662e+00  -6.3489555e+00
   2.1553910e+01  -2.8502246e+01   2.0000000e+02  -7.4537149e+00  -7.4573756e-01  -6.4120922e+00
   2.2269128e+01  -2.8725255e+01   2.0000000e+02  -6.9468776e+00   3.4004368e+00  -4.8504375e+00
   2.2415792e+01  -2.8730185e+01   2.0000000e+02  -6.7184779e+00   4.3152043e+00  -4.2428784e+00
   2.2562566e+01  -2.8730523e+01   2.0000000e+02  -6.4899116e+00   5.1798331e+00  -3.4763915e+00
   2.2709259e+01  -2.8726270e+01   2.0000000e+02  -6.2712890e+00   5.9582972e+00  -2.5636435e+00
   2.2855675e+01  -2.8717431e+01   2.0000000e+02  -6.0713079e+00   6.6183475e+00  -1.5299998e+00
   2.3001624e+01  -2.8704018e+01   2.0000000e+02  -5.8967197e+00   7.1358142e+00  -4.1099390e-01
   2.3146912e+01  -2.8686049e+01   2.0000000e+02  -5.7519895e+00   7.4973554e+00   7.5175693e-01
   2.3291350e+01  -2.8663546e+01   2.0000000e+02  -5.6391364e+00   7.7013549e+00   1.9154347e+00
   2.3434748e+01  -2.8636541e+01   2.0000000e+02  -5.5577962e+00   7.7569400e+00   3.0404398e+00
   2.3576918e+01  -2.8605068e+01   2.0000000e+02  -5.5055201e+00   7.6817174e+00   4.0937823e+00
   2.3717676e+01  -2.8569169e+01   2.0000000e+02  -5.4782471e+00   7.4987855e+00   5.0510982e+00
   2.3856838e+01  -2.8528892e+01   2.0000000e+02  -5.4709535e+00   7.2336549e+00   5.8972216e+00
   2.3994225e+01  -2.8484289e+01   2.0000000e+02  -5.4783732e+00   6.9114919e+00   6.6256480e+00
   2.4129659e+01  -2.8435419e+01   2.0000000e+02  -5.4956742e+00   6.5550012e+00   7.2370932e+00
   2.4262966e+01  -2.8382346e+01   2.0000000e+02  -5.5190017e+00   6.1830764e+00   7.7376009e+00
   2.4393977e+01  -2.8325140e+01   2.0000000e+02  -5.5457927e+00   5.8102322e+00   8.1365172e+00
   2.4522525e+01  -2.8263874e+01   2.0000000e+02  -5.5748733e+00   5.4467235e+00   8.4446161e+00
   2.4648447e+01  -2.8198630e+01   2.0000000e+02  -5.6063005e+00   5.0990928e+00   8.6726545e+00
   2.4771586e+01  -2.8129492e+01   2.0000000e+02  -5.6411004e+00   4.7709828e+00   8.8303278e+00
   2.4891788e+01  -2.8056549e+01   2.0000000e+02  -5.6808723e+00   4.4640122e+00   8.9256664e+00
   2.5008905e+01  -2.7979897e+01   2.0000000e+02  -5.7273335e+00   4.1785807e+00   8.9648184e+00
   2.5122793e+01  -2.7899633e+01   2.0000000e+02  -5.7819047e+00   3.9146086e+00   8.9521128e+00
   2.5233313e+01  -2.7815863e+01   2.0000000e+02  -5.8453118e+00   3.6720872e+00   8.8904685e+00
   2.5340333e+01  -2.7728693e+01   2.0000000e+02  -5.9174209e+00   3.4514702e+00   8.7819838e+00
   2.5443724e+01  -2.7638234e+01   2.0000000e+02  -5.9972904e+00   3.2537960e+00   8.6286754e+00
   2.5543365e+01  -2.7544604e+01   2.0000000e+02  -6.0834965e+00   3.0804873e+00   8.4331370e+00
   2.5639139e+01  -2.7447920e+01   2.0000000e+02  -6.1747013e+00   2.9329496e+00   8.1988350e+00
   2.5730936e+01  -2.7348306e+01   2.0000000e+02  -6.2701606e+00   2.8119685e+00   7.9299980e+00
   2.5818651e+01  -2.7245887e+01   2.0000000e+02  -6.3700526e+00   2.7172053e+00   7.6309835e+00
   2.5902185e+01  -2.7140794e+01   2.0000000e+02  -6.4753460e+00   2.6468822e+00   7.3054162e+00
   2.5981446e+01  -2.7033159e+01   2.0000000e+02  -6.5872161e+00   2.5978253e+00   6.9553537e+00
   2.6056348e+01  -2.6923116e+01   2.0000000e+02  -6.7060996e+00   2.5658332e+00   6.5808981e+00
   2.6126811e+01  -2.6810803e+01   2.0000000e+02  -6.8306940e+00   2.5462633e+00   6.1804702e+00
   2.6192761e+01  -2.6696360e+01   2.0000000e+02  -6.9572756e+00   2.5346685e+00   5.7517289e+00
   2.6254129e+01  -2.6579929e+01   2.0000000e+02  -7.0796179e+00   2.5273009e+00   5.2929068e+00
   2.6310856e+01  -2.6461654e+01   2.0000000e+02  -7.1896107e+00   2.5213540e+00   4.8041458e+00
   2.6362886e+01  -2.6341682e+01   2.0000000e+02  -7.2784584e+00   2.5149632e+00   4.2883931e+00
   2.6410170e+01  -2.6220159e+01   2.0000000e+02  -7.3381097e+00   2.5069895e+00   3.7515761e+00
   2.6452665e+01  -2.6097235e+01   2.0000000e+02  -7.3625228e+00   2.4967422e+00   3.2020757e+00
   2.6490336e+01  -2.5973060e+01   2.0000000e+02  -7.3484666e+00   2.4837664e+00   2.6496359e+00
   2.6523153e+01  -2.5847785e+01   2.0000000e+02  -7.2957213e+00   2.4677790e+00   2.1041233e+00
   2.6551090e+01  -2.5721561e+01   2.0000000e+02  -7.2067768e+00   2.4487510e+00   1.5744535e+00
   2.6574131e+01  -2.5594542e+01   2.0000000e+02  -7.0862752e+00   2.4270736e+00   1.0679067e+00
   2.6592264e+01  -2.5466880e+01   2.0000000e+02  -6.9404514e+00   2.4037231e+00   5.8974781e-01
   2.6605482e+01  -2.5338729e+01   2.0000000e+02  -6.7767145e+00   2.3803071e+00   1.4304818e-01
   2.6613785e+01  -2.5210243e+01   2.0000000e+02  -6.6033009e+00   2.3589334e+00  -2.7156662e-01
   2.6617180e+01  -2.5081574e+01   2.0000000e+02  -6.4287936e+00   2.3418897e+00  -6.5628813e-01
   2.6615678e+01  -2.4952875e+01   2.0000000e+02  -6.2613190e+00   2.3311662e+00  -1.0164544e+00
   2.6609296e+01  -2.4824299e+01   2.0000000e+02  -6.1073707e+00   2.3278807e+00  -1.3605649e+00
   2.6598056e+01  -2.4695999e+01   2.0000000e+02  -5.9704697e+00   2.3316983e+00  -1.6996787e+00
   2.6581987e+01  -2.4568124e+01   2.0000000e+02  -5.8500186e+00   2.3403456e+00  -2.0461008e+00
   2.6561123e+01  -2.4440827e+01   2.0000000e+02  -5.7407517e+00   2.3493350e+00  -2.4114600e+00
   2.6535501e+01  -2.4314254e+01   2.0000000e+02  -5.6330070e+00   2.3520001e+00  -2.8046123e+00
   2.6505167e+01  -2.4188555e+01   2.0000000e+02  -5.5139143e+00   2.3399093e+00  -3.2296962e+00
   2.6470168e+01  -2.4063876e+01   2.0000000e+02  -5.3693114e+00   2.3036623e+00  -3.6849005e+00
   2.6430559e+01  -2.3940361e+01   2.0000000e+02  -5.1860940e+00   2.2339541e+00  -4.1621581e+00
   2.6386398e+01  -2.3818154e+01   2.0000000e+02  -4.9545451e+00   2.1227218e+00  -4.6479639e+00
   2.6337749e+01  -2.3697395e+01   2.0000000e+02  -4.6701524e+00   1.9641178e+00  -5.1252311e+00
   2.6284679e+01  -2.3578225e+01   2.0000000e+02  -4.3344952e+00   1.7551004e+00  -5.5758239e+00
   2.6227262e+01  -2.3460779e+01   2.0000000e+02  -3.9549307e+00   1.4955051e+00  -5.9832638e+00
   2.6165574e+01  -2.3345193e+01   2.0000000e+02  -3.5431593e+00   1.1876485e+00  -6.3349414e+00
   2.6099696e+01  -2.3231599e+01   2.0000000e+02  -3.1129953e+00   8.3560912e-01  -6.6233600e+00
   2.6029713e+01  -2.3120126e+01   2.0000000e+02  -2.6779459e+00   4.4444771e-01  -6.8461571e+00
   2.5955714e+01  -2.3010902e+01   2.0000000e+02  -2.2491982e+00   1.9595778e-02  -7.0050503e+00
   2.5877794e+01  -2.2904050e+01   2.0000000e+02  -1.8344395e+00  -4.3347610e-01  -7.1041366e+00
   2.5796047e+01  -2.2799692e+01   2.0000000e+02  -1.4376625e+00  -9.0929302e-01  -7.1480959e+00
   2.5710576e+01  -2.2697946e+01   2.0000000e+02  -1.0598529e+00  -1.4022070e+00  -7.1407582e+00
   2.5621484e+01  -2.2598927e+01   2.0000000e+02  -7.0014998e-01  -1.9062019e+00  -7.0843457e+00
   2.5528878e+01  -2.2502747e+01   2.0000000e+02  -3.5716589e-01  -2.4147382e+00  -6.9793959e+00
   2.5432870e+01  -2.2409513e+01   2.0000000e+02  -3.0100681e-02  -2.9207227e+00  -6.8252411e+00
   2.5333573e+01  -2.2319331e+01   2.0000000e+02   2.8052936e-01  -3.4165829e+00  -6.6208186e+00
   2.5231104e+01  -2.2232302e+01   2.0000000e+02   5.7256272e-01  -3.8944382e+00  -6.3655911e+00
   2.5125583e+01  -2.2148524e+01   2.0000000e+02   8.4222743e-01  -4.3463493e+00  -6.0604363e+00
   2.5017132e+01  -2.2068090e+01   2.0000000e+02   1.0844406e+00  -4.7646985e+00  -5.7083884e+00
   2.4905878e+01  -2.1991089e+01   2.0000000e+02   1.2932786e+00  -5.1427211e+00  -5.3151624e+00
   2.4791947e+01  -2.1917609e+01   2.0000000e+02   1.4625866e+00  -5.4752404e+00  -4.8893296e+00
   2.4675470e+01  -2.1847731e+01   2.0000000e+02   1.5866233e+00  -5.7595203e+00  -4.4420484e+00
   2.4556580e+01  -2.1781533e+01   2.0000000e+02   1.6607242e+00  -5.9960773e+00  -3.9862721e+00
   2.4435411e+01  -2.1719088e+01   2.0000000e+02   1.6818721e+00  -6.1892260e+00  -3.5354470e+00
   2.4312100e+01  -2.1660467e+01   2.0000000e+02   1.6490923e+00  -6.3471114e+00  -3.1018975e+00
   2.4186786e+01  -2.1605733e+01   2.0000000e+02   1.5636015e+00  -6.4811063e+00  -2.6951498e+00
   2.4059608e+01  -2.1554947e+01   2.0000000e+02   1.4287059e+00  -6.6045887e+00  -2.3206088e+00
   2.3930710e+01  -2.1508167e+01   2.0000000e+02   1.2494789e+00  -6.7313179e+00  -1.9788652e+00
   2.3800234e+01  -2.1465444e+01   2.0000000e+02   1.0323025e+00  -6.8737630e+00  -1.6657510e+00
   2.3668325e+01  -2.1426825e+01   2.0000000e+02   7.8441026e-01  -7.0417267e+00  -1.3731391e+00
   2.3535131e+01  -2.1392352e+01   2.0000000e+02   5.1349653e-01  -7.2415261e+00  -1.0901708e+00
   2.3400797e+01  -2.1362065e+01   2.0000000e+02   2.2742941e-01  -7.4758096e+00  -8.0457959e-01
   2.3265473e+01  -2.1335996e+01   2.0000000e+02  -6.5949079e-02  -7.7438232e+00  -5.0385173e-01
   2.3129308e+01  -2.1314174e+01   2.0000000e+02  -3.5898458e-01  -8.0419876e+00  -1.7603256e-01
   2.2992451e+01  -2.1296624e+01   2.0000000e+02  -6.4438760e-01  -8.3644921e+00   1.8978978e-01
   2.2855053e+01  -2.1283364e+01   2.0000000e+02  -9.1544603e-01  -8.7037726e+00   6.0321330e-01
   2.2717265e+01  -2.1274410e+01   2.0000000e+02  -1.1662395e+00  -9.0508622e+00   1.0723648e+00
   2.2579239e+01  -2.1269771e+01   2.0000000e+02  -1.3918444e+00  -9.3955833e+00   1.6037173e+00
   2.2441126e+01  -2.1269452e+01   2.0000000e+02  -1.5884477e+00  -9.7266883e+00   2.2018715e+00
   2.2303077e+01  -2.1273454e+01   2.0000000e+02  -1.7533545e+00  -1.0031973e+01   2.8692457e+00
   2.2165245e+01  -2.1281773e+01   2.0000000e+02  -1.8848885e+00  -1.0298447e+01   3.6056786e+00
   2.2027780e+01  -2.1294398e+01   2.0000000e+02  -1.9822205e+00  -1.0512656e+01   4.4080181e+00
   2.1890834e+01  -2.1311317e+01   2.0000000e+02  -2.0451282e+00  -1.0661200e+01   5.2697076e+00
   2.1754557e+01  -2.1332510e+01   2.0000000e+02  -2.0738122e+00  -1.0731517e+01   6.1805128e+00
   2.1619100e+01  -2.1357955e+01   2.0000000e+02  -2.0687102e+00  -1.0712904e+01   7.1265251e+00
   2.1484611e+01  -2.1387622e+01   2.0000000e+02  -2.0303975e+00  -1.0597665e+01   8.0905757e+00
   2.1351239e+01  -2.1421479e+01   2.0000000e+02  -1.9594802e+00  -1.0382205e+01   9.0531148e+00
   2.1219132e+01  -2.1459490e+01   2.0000000e+02  -1.8565307e+00  -1.0067795e+01   9.9935367e+00
   2.1088435e+01  -2.1501611e+01   2.0000000e+02  -1.7220368e+00  -9.6608155e+00   1.0891757e+01
   2.0959295e+01  -2.1547796e+01   2.0000000e+02  -1.5563343e+00  -9.1723663e+00   1.1729778e+01
   2.0831855e+01  -2.1597994e+01   2.0000000e+02  -1.3596018e+00  -8.6172525e+00   1.2492991e+01
   2.0706257e+01  -2.1652149e+01   2.0000000e+02  -1.1318966e+00  -8.0125913e+00   1.3170928e+01
   2.0582642e+01  -2.1710202e+01   2.0000000e+02  -8.7323678e-01  -7.3762913e+00   1.3757448e+01
   2.0461148e+01  -2.1772087e+01   2.0000000e+02  -5.8374196e-01  -6.7256732e+00   1.4250384e+01
   2.0341913e+01  -2.1837736e+01   2.0000000e+02  -2.6374879e-01  -6.0764600e+00   1.4650816e+01
   2.0225072e+01  -2.1907076e+01   2.0000000e+02   8.6064245e-02  -5.4421654e+00   1.4962164e+01
   2.0110758e+01  -2.1980030e+01   2.0000000e+02   4.6459715e-01  -4.8339033e+00   1.5189261e+01
   1.9999101e+01  -2.2056517e+01   2.0000000e+02   8.7026615e-01  -4.2604938e+00   1.5337534e+01
   1.9890229e+01  -2.2136450e+01   2.0000000e+02   1.3009251e+00  -3.7287621e+00   1.5412369e+01
   1.9784268e+01  -2.2219741e+01   2.0000000e+02   1.7537933e+00  -3.2438948e+00   1.5418694e+01
   1.9681341e+01  -2.2306297e+01   2.0000000e+02   2.2253030e+00  -2.8097683e+00   1.5360778e+01
   1.9581569e+01  -2.2396020e+01   2.0000000e+02   2.7109557e+00  -2.4292014e+00   1.5242243e+01
   1.9485068e+01  -2.2488810e+01   2.0000000e+02   3.2052367e+00  -2.1040812e+00   1.5066259e+01
   1.9391954e+01  -2.2584563e+01   2.0000000e+02   3.7016063e+00  -1.8354110e+00   1.4835858e+01
   1.9302337e+01  -2.2683170e+01   2.0000000e+02   4.1926380e+00  -1.6232285e+00   1.4554274e+01
   1.9216325e+01  -2.2784521e+01   2.0000000e+02   4.6703391e+00  -1.4665312e+00   1.4225240e+01
   1.9134023e+01  -2.2888502e+01   2.0000000e+02   5.1265481e+00  -1.3632029e+00   1.3853158e+01
   1.9055532e+01  -2.2994993e+01   2.0000000e+02   5.5533983e+00  -1.3100224e+00   1.3443143e+01
   1.8980949e+01  -2.3103875e+01   2.0000000e+02   5.9438309e+00  -1.3028128e+00   1.3000891e+01
   1.8910369e+01  -2.3215024e+01   2.0000000e+02   6.2919955e+00  -1.3366996e+00   1.2532491e+01
   1.8843880e+01  -2.3328314e+01   2.0000000e+02   6.5936022e+00  -1.4064528e+00   1.2044131e+01
   1.8781568e+01  -2.3443614e+01   2.0000000e+02   6.8461494e+00  -1.5068752e+00   1.1541787e+01
   1.8723516e+01  -2.3560794e+01   2.0000000e+02   7.0490225e+00  -1.6331568e+00   1.1030852e+01
   1.8669801e+01  -2.3679719e+01   2.0000000e+02   7.2033486e+00  -1.7810907e+00   1.0515796e+01
   1.8620496e+01  -2.3800252e+01   2.0000000e+02   7.3116792e+00  -1.9471879e+00   9.9998360e+00
   1.8575669e+01  -2.3922254e+01   2.0000000e+02   7.3774415e+00  -2.1286301e+00   9.4847201e+00
   1.8535385e+01  -2.4045585e+01   2.0000000e+02   7.4042460e+00  -2.3231166e+00   8.9706647e+00
   1.8499702e+01  -2.4170102e+01   2.0000000e+02   7.3951321e+00  -2.5286115e+00   8.4565412e+00
   1.8468677e+01  -2.4295659e+01   2.0000000e+02   7.3519412e+00  -2.7431351e+00   7.9402848e+00
   1.8442357e+01  -2.4422112e+01   2.0000000e+02   7.2748882e+00  -2.9645641e+00   7.4195025e+00
   1.8420789e+01  -2.4549313e+01   2.0000000e+02   7.1625118e+00  -3.1905797e+00   6.8922166e+00
   1.8404011e+01  -2.4677111e+01   2.0000000e+02   7.0119480e+00  -3.4186560e+00   6.3575852e+00
   1.8392057e+01  -2.4805359e+01   2.0000000e+02   6.8195300e+00  -3.6462009e+00   5.8164200e+00
   1.8384957e+01  -2.4933903e+01   2.0000000e+02   6.5815667e+00  -3.8706647e+00   5.2715376e+00
   1.8382734e+01  -2.5062593e+01   2.0000000e+02   6.2951106e+00  -4.0896712e+00   4.7277385e+00
   1.8385406e+01  -2.5191276e+01   2.0000000e+02   5.9586475e+00  -4.3010955e+00   4.1916072e+00
   1.8392985e+01  -2.5319800e+01   2.0000000e+02   5.5725905e+00  -4.5031128e+00   3.6710934e+00
   1.8405478e+01  -2.5448010e+01   2.0000000e+02   5.1396275e+00  -4.6942288e+00   3.1750010e+00
   1.8422886e+01  -2.5575753e+01   2.0000000e+02   4.6648978e+00  -4.8733250e+00   2.7123385e+00
   1.8445204e+01  -2.5702876e+01   2.0000000e+02   4.1560477e+00  -5.0397264e+00   2.2915686e+00
   1.8472420e+01  -2.5829227e+01   2.0000000e+02   3.6230836e+00  -5.1932913e+00   1.9197136e+00
   1.8504519e+01  -2.5954652e+01   2.0000000e+02   3.0779631e+00  -5.3345149e+00   1.6013654e+00
   1.8541475e+01  -2.6078999e+01   2.0000000e+02   2.5338119e+00  -5.4645199e+00   1.3377771e+00
   1.8583262e+01  -2.6202117e+01   2.0000000e+02   2.0038284e+00  -5.5850297e+00   1.1261269e+00
   1.8629842e+01  -2.6323855e+01   2.0000000e+02   1.4999718e+00  -5.6980972e+00   9.5929243e-01
   1.8681175e+01  -2.6444066e+01   2.0000000e+02   1.0315942e+00  -5.8057889e+00   8.2608593e-01
   1.8737212e+01  -2.6562600e+01   2.0000000e+02   6.0432386e-01  -5.9096914e+00   7.1213657e-01
   1.8797900e+01  -2.6679312e+01   2.0000000e+02   2.1929202e-01  -6.0104202e+00   6.0123945e-01
   1.8863178e+01  -2.6794057e+01   2.0000000e+02  -1.2703687e-01  -6.1071653e+00   4.7707944e-01
   1.8932980e+01  -2.6906693e+01   2.0000000e+02  -4.4247278e-01  -6.1974302e+00   3.2505226e-01
   1.9007232e+01  -2.7017079e+01   2.0000000e+02  -7.3814107e-01  -6.2770239e+00   1.3397619e-01
   1.9085856e+01  -2.7125079e+01   2.0000000e+02  -1.0271275e+00  -6.3403930e+00  -1.0258699e-01
   1.9168766e+01  -2.7230555e+01   2.0000000e+02  -1.3228581e+00  -6.3812646e+00  -3.8555280e-01
   1.9255870e+01  -2.7333376e+01   2.0000000e+02  -1.6374781e+00  -6.3935324e+00  -7.1023938e-01
   1.9347071e+01  -2.7433411e+01   2.0000000e+02  -1.9803739e+00  -6.3722768e+00  -1.0670585e+00
   1.9442266e+01  -2.7530535e+01   2.0000000e+02  -2.3570569e+00  -6.3146696e+00  -1.4428913e+00
   1.9541343e+01  -2.7624624e+01   2.0000000e+02  -2.7685182e+00  -6.2206041e+00  -1.8230224e+00
   1.9644189e+01  -2.7715557e+01   2.0000000e+02  -3.2112072e+00  -6.0928356e+00  -2.1934125e+00
   1.9750682e+01  -2.7803219e+01   2.0000000e+02  -3.6775775e+00  -5.9364764e+00  -2.5428183e+00
   1.9860694e+01  -2.7887498e+01   2.0000000e+02  -4.1571742e+00  -5.7579330e+00  -2.8644897e+00
   1.9974094e+01  -2.7968285e+01   2.0000000e+02  -4.6380686e+00  -5.5633956e+00  -3.1570067e+00
   2.0090744e+01  -2.8045476e+01   2.0000000e+02  -5.1083492e+00  -5.3571956e+00  -3.4239877e+00
   2.0210501e+01  -2.8118972e+01   2.0000000e+02  -5.5573924e+00  -5.1404515e+00  -3.6727443e+00
   2.0333216e+01  -2.8188677e+01   2.0000000e+02  -5.9766317e+00  -4.9103673e+00  -3.9121342e+00
   2.0458737e+01  -2.8254501e+01   2.0000000e+02  -6.3597355e+00  -4.6603898e+00  -4.1501411e+00
   2.0586908e+01  -2.8316358e+01   2.0000000e+02  -6.7022147e+00  -4.3812250e+00  -4.3917929e+00
   2.0717566e+01  -2.8374168e+01   2.0000000e+02  -7.0007208e+00  -4.0624144e+00  -4.6378909e+00
   2.0850545e+01  -2.8427855e+01   2.0000000e+02  -7.2523432e+00  -3.6940087e+00  -4.8848269e+00
   2.0985676e+01  -2.8477349e+01   2.0000000e+02  -7.4541841e+00  -3.2678591e+00  -5.1252546e+00
   2.1122786e+01  -2.8522585e+01   2.0000000e+02  -7.6033535e+00  -2.7782327e+00  -5.3492120e+00
   2.1261698e+01  -2.8563504e+01   2.0000000e+02  -7.6973756e+00  -2.2217304e+00  -5.5451215e+00
   2.1402232e+01  -2.8600051e+01   2.0000000e+02  -7.7348338e+00  -1.5968048e+00  -5.7002595e+00
   2.1544205e+01  -2.8632180e+01   2.0000000e+02  -7.7160488e+00  -9.0338626e-01  -5.8005178e+00
   2.1687434e+01  -2.8659846e+01   2.0000000e+02  -7.6435490e+00  -1.4308160e-01  -5.8298347e+00
   2.1831730e+01  -2.8683015e+01   2.0000000e+02  -7.5222848e+00   6.7971479e-01  -5.7697085e+00
   2.1976905e+01  -2.8701654e+01   2.0000000e+02  -7.3594715e+00   1.5560870e+00  -5.5996929e+00
   2.2122768e+01  -2.8715741e+01   2.0000000e+02  -7.1642088e+00   2.4706551e+00  -5.2991451e+00
   2.2871159e+01  -2.8845191e+01   2.0000000e+02  -5.9514037e+00   6.4580458e+00  -1.1559026e+00
   2.3016710e+01  -2.8831814e+01   2.0000000e+02  -5.7108887e+00   6.9736168e+00  -5.2580620e-02
   2.3161629e+01  -2.8814061e+01   2.0000000e+02  -5.5005518e+00   7.3325772e+00   1.1004583e+00
   2.3305737e+01  -2.8791954e+01   2.0000000e+02  -5.3245831e+00   7.5324559e+00   2.2603483e+00
   2.3448861e+01  -2.8765519e+01   2.0000000e+02  -5.1844592e+00   7.5815217e+00   3.3871811e+00
   2.3590824e+01  -2.8734790e+01   2.0000000e+02  -5.0791111e+00   7.4965711e+00   4.4472524e+00
   2.3731456e+01  -2.8699805e+01   2.0000000e+02  -5.0053595e+00   7.3000981e+00   5.4151411e+00
   2.3870586e+01  -2.8660605e+01   2.0000000e+02  -4.9585956e+00   7.0173546e+00   6.2743415e+00
   2.4008046e+01  -2.8617239e+01   2.0000000e+02  -4.9335370e+00   6.6736863e+00   7.0169079e+00
   2.4143671e+01  -2.8569760e+01   2.0000000e+02  -4.9250104e+00   6.2924266e+00   7.6422354e+00
   2.4277300e+01  -2.8518226e+01   2.0000000e+02  -4.9285835e+00   5.8934661e+00   8.1553537e+00
   2.4408774e+01  -2.8462700e+01   2.0000000e+02  -4.9409833e+00   5.4925516e+00   8.5650202e+00
   2.4537936e+01  -2.8403249e+01   2.0000000e+02  -4.9602657e+00   5.1012220e+00   8.8819252e+00
   2.4664636e+01  -2.8339946e+01   2.0000000e+02  -4.9857395e+00   4.7271961e+00   9.1172182e+00
   2.4788725e+01  -2.8272867e+01   2.0000000e+02  -5.0177675e+00   4.3750920e+00   9.2813737e+00
   2.4910059e+01  -2.8202094e+01   2.0000000e+02  -5.0574228e+00   4.0471968e+00   9.3834900e+00
   2.5028498e+01  -2.8127711e+01   2.0000000e+02  -5.1061243e+00   3.7442572e+00   9.4308786e+00
   2.5143907e+01  -2.8049808e+01   2.0000000e+02  -5.1652060e+00   3.4661763e+00   9.4289563e+00
   2.5256155e+01  -2.7968479e+01   2.0000000e+02  -5.2355277e+00   3.2126420e+00   9.3813874e+00
   2.5365115e+01  -2.7883822e+01   2.0000000e+02  -5.3171600e+00   2.9836190e+00   9.2905036e+00
   2.5470667e+01  -2.7795936e+01   2.0000000e+02  -5.4092572e+00   2.7796460e+00   9.1579540e+00
   2.5572694e+01  -2.7704927e+01   2.0000000e+02  -5.5101830e+00   2.6018731e+00   8.9854745e+00
   2.5671085e+01  -2.7610903e+01   2.0000000e+02  -5.6179445e+00   2.4518003e+00   8.7755251e+00
   2.5765733e+01  -2.7513975e+01   2.0000000e+02  -5.7308023e+00   2.3307748e+00   8.5315858e+00
   2.5856538e+01  -2.7414257e+01   2.0000000e+02  -5.8478579e+00   2.2393700e+00   8.2579482e+00
   2.5943405e+01  -2.7311868e+01   2.0000000e+02  -5.9693886e+00   2.1768655e+00   7.9590226e+00
   2.6026242e+01  -2.7206926e+01   2.0000000e+02  -6.0967495e+00   2.1410032e+00   7.6383397e+00
   2.6104966e+01  -2.7099554e+01   2.0000000e+02  -6.2317132e+00   2.1280420e+00   7.2976650e+00
   2.6179498e+01  -2.6989879e+01   2.0000000e+02  -6.3754602e+00   2.1331947e+00   6.9365215e+00
   2.6249764e+01  -2.6878026e+01   2.0000000e+02  -6.5274703e+00   2.1512587e+00   6.5523792e+00
   2.6315695e+01  -2.6764125e+01   2.0000000e+02  -6.6846573e+00   2.1772572e+00   6.1416002e+00
   2.6377231e+01  -2.6648309e+01   2.0000000e+02  -6.8411200e+00   2.2069468e+00   5.7008362e+00
   2.6434314e+01  -2.6530709e+01   2.0000000e+02  -6.9886534e+00   2.2370912e+00   5.2284714e+00
   2.6486893e+01  -2.6411461e+01   2.0000000e+02  -7.1178645e+00   2.2654184e+00   4.7257464e+00
   2.6534923e+01  -2.6290702e+01   2.0000000e+02  -7.2196537e+00   2.2904048e+00   4.1971344e+00
   2.6578363e+01  -2.6168567e+01   2.0000000e+02  -7.2866156e+00   2.3109850e+00   3.6499400e+00
   2.6617180e+01  -2.6045196e+01   2.0000000e+02  -7.3140004e+00   2.3263145e+00   3.0933517e+00
   2.6651344e+01  -2.5920729e+01   2.0000000e+02  -7.3000878e+00   2.3357068e+00   2.5371786e+00
   2.6680833e+01  -2.5795305e+01   2.0000000e+02  -7.2459862e+00   2.3387224e+00   1.9907358e+00
   2.6705628e+01  -2.5669065e+01   2.0000000e+02  -7.1551024e+00   2.3353753e+00   1.4621127e+00
   2.6725717e+01  -2.5542152e+01   2.0000000e+02  -7.0325655e+00   2.3263454e+00   9.5783745e-01
   2.6741092e+01  -2.5414705e+01   2.0000000e+02  -6.8848083e+00   2.3131058e+00   4.8274805e-01
   2.6751752e+01  -2.5286867e+01   2.0000000e+02  -6.7193478e+00   2.2978873e+00   3.9898859e-02
   2.6757700e+01  -2.5158780e+01   2.0000000e+02  -6.5445683e+00   2.2834578e+00  -3.6979936e-01
   2.6758944e+01  -2.5030584e+01   2.0000000e+02  -6.3692682e+00   2.2727252e+00  -7.4809828e-01
   2.6755498e+01  -2.4902422e+01   2.0000000e+02  -6.2018108e+00   2.2682057e+00  -1.0998535e+00
   2.6747379e+01  -2.4774434e+01   2.0000000e+02  -6.0488948e+00   2.2714190e+00  -1.4331025e+00
   2.6734612e+01  -2.4646759e+01   2.0000000e+02  -5.9142314e+00   2.2822900e+00  -1.7584618e+00
   2.6717224e+01  -2.4519538e+01   2.0000000e+02  -5.7974810e+00   2.2986620e+00  -2.0878320e+00
   2.6695248e+01  -2.4392908e+01   2.0000000e+02  -5.6937702e+00   2.3160360e+00  -2.4326037e+00
   2.6668722e+01  -2.4267007e+01   2.0000000e+02  -5.5940033e+00   2.3276467e+00  -2.8016564e+00
   2.6637687e+01  -2.4141970e+01   2.0000000e+02  -5.4859729e+00   2.3249398e+00  -3.1995904e+00
   2.6602190e+01  -2.4017934e+01   2.0000000e+02  -5.3561512e+00   2.2984313e+00  -3.6255050e+00
   2.6562281e+01  -2.3895031e+01   2.0000000e+02  -5.1918747e+00   2.2388254e+00  -4.0726828e+00
   2.6518015e+01  -2.3773393e+01   2.0000000e+02  -4.9835573e+00   2.1381792e+00  -4.5292548e+00
   2.6469452e+01  -2.3653150e+01   2.0000000e+02  -4.7264621e+00   1.9908616e+00  -4.9798676e+00
   2.6416655e+01  -2.3534430e+01   2.0000000e+02  -4.4216097e+00   1.7940858e+00  -5.4080460e+00
   2.6359690e+01  -2.3417361e+01   2.0000000e+02  -4.0755591e+00   1.5479169e+00  -5.7987418e+00
   2.6298630e+01  -2.3302065e+01   2.0000000e+02  -3.6990582e+00   1.2547858e+00  -6.1404792e+00
   2.6233547e+01  -2.3188666e+01   2.0000000e+02  -3.3049117e+00   9.1871494e-01  -6.4265604e+00
   2.6164521e+01  -2.3077283e+01   2.0000000e+02  -2.9056097e+00   5.4449557e-01  -6.6550833e+00
   2.6091634e+01  -2.2968034e+01   2.0000000e+02  -2.5113255e+00   1.3706695e-01  -6.8278944e+00
   2.6014971e+01  -2.2861034e+01   2.0000000e+02  -2.1287368e+00  -2.9877646e-01  -6.9488746e+00
   2.5934621e+01  -2.2756394e+01   2.0000000e+02  -1.7608522e+00  -7.5834481e-01  -7.0221188e+00
   2.5850676e+01  -2.2654226e+01   2.0000000e+02  -1.4077127e+00  -1.2367837e+00  -7.0505188e+00
   2.5763230e+01  -2.2554635e+01   2.0000000e+02  -1.0676109e+00  -1.7287951e+00  -7.0350373e+00
   2.5672383e+01  -2.2457726e+01   2.0000000e+02  -7.3847072e-01  -2.2283943e+00  -6.9747192e+00
   2.5578234e+01  -2.2363601e+01   2.0000000e+02  -4.1896537e-01  -2.7288777e+00  -6.8672720e+00
   2.5480888e+01  -2.2272356e+01   2.0000000e+02  -1.0926874e-01  -3.2229044e+00  -6.7099490e+00
   2.5380451e+01  -2.2184087e+01   2.0000000e+02   1.8866391e-01  -3.7026664e+00  -6.5005062e+00
   2.5277033e+01  -2.2098885e+01   2.0000000e+02   4.7115634e-01  -4.1601198e+00  -6.2380661e+00
   2.5170746e+01  -2.2016839e+01   2.0000000e+02   7.3311729e-01  -4.5872526e+00  -5.9238356e+00
   2.5061703e+01  -2.1938034e+01   2.0000000e+02   9.6847560e-01  -4.9764661e+00  -5.5616440e+00
   2.4950021e+01  -2.1862551e+01   2.0000000e+02   1.1706779e+00  -5.3211152e+00  -5.1582824e+00
   2.4835818e+01  -2.1790468e+01   2.0000000e+02   1.3332491e+00  -5.6162542e+00  -4.7235359e+00
   2.4719216e+01  -2.1721859e+01   2.0000000e+02   1.4503702e+00  -5.8595085e+00  -4.2698159e+00
   2.4600336e+01  -2.1656796e+01   2.0000000e+02   1.5174594e+00  -6.0519110e+00  -3.8112832e+00
   2.4479304e+01  -2.1595345e+01   2.0000000e+02   1.5316577e+00  -6.1984470e+00  -3.3625092e+00
   2.4356246e+01  -2.1537569e+01   2.0000000e+02   1.4921722e+00  -6.3080845e+00  -2.9368058e+00
   2.4231289e+01  -2.1483527e+01   2.0000000e+02   1.4003852e+00  -6.3931472e+00  -2.5445377e+00
   2.4104564e+01  -2.1433276e+01   2.0000000e+02   1.2597257e+00  -6.4680682e+00  -2.1917697e+00
   2.3976201e+01  -2.1386867e+01   2.0000000e+02   1.0753242e+00  -6.5477436e+00  -1.8795120e+00
   2.3846332e+01  -2.1344346e+01   2.0000000e+02   8.5355517e-01  -6.6458185e+00  -1.6037680e+00
   2.3715091e+01  -2.1305759e+01   2.0000000e+02   6.0157696e-01  -6.7732809e+00  -1.3562839e+00
   2.3582613e+01  -2.1271144e+01   2.0000000e+02   3.2691915e-01  -6.9375825e+00  -1.1257388e+00
   2.3449032e+01  -2.1240537e+01   2.0000000e+02   3.7203999e-02  -7.1423901e+00  -8.9908112e-01
   2.3314487e+01  -2.1213968e+01   2.0000000e+02  -2.6004222e-01  -7.3877993e+00  -6.6271270e-01
   2.3179113e+01  -2.1191466e+01   2.0000000e+02  -5.5753648e-01  -7.6708693e+00  -4.0334534e-01
   2.3043048e+01  -2.1173053e+01   2.0000000e+02  -8.4838510e-01  -7.9861629e+00  -1.0857860e-01
   2.2906432e+01  -2.1158749e+01   2.0000000e+02  -1.1262450e+00  -8.3262412e+00   2.3274833e-01
   2.2769404e+01  -2.1148566e+01   2.0000000e+02  -1.3855310e+00  -8.6820197e+00   6.3029521e-01
   2.2632101e+01  -2.1142517e+01   2.0000000e+02  -1.6215650e+00  -9.0430481e+00   1.0919935e+00
   2.2494664e+01  -2.1140607e+01   2.0000000e+02  -1.8306941e+00  -9.3976819e+00   1.6237375e+00
   2.2357233e+01  -2.1142839e+01   2.0000000e+02  -2.0102967e+00  -9.7333041e+00   2.2291061e+00
   2.2219947e+01  -2.1149209e+01   2.0000000e+02  -2.1587034e+00  -1.0036544e+01   2.9090218e+00
   2.2082945e+01  -2.1159712e+01   2.0000000e+02  -2.2750105e+00  -1.0293585e+01   3.6614172e+00
   2.1946367e+01  -2.1174336e+01   2.0000000e+02  -2.3588898e+00  -1.0490598e+01   4.4808749e+00
   2.1810352e+01  -2.1193067e+01   2.0000000e+02  -2.4103912e+00  -1.0614382e+01   5.3583914e+00
   2.1675037e+01  -2.1215886e+01   2.0000000e+02  -2.4298143e+00  -1.0653216e+01   6.2812971e+00
   2.1540561e+01  -2.1242768e+01   2.0000000e+02  -2.4176321e+00  -1.0597898e+01   7.2334651e+00
   2.1407062e+01  -2.1273688e+01   2.0000000e+02  -2.3744397e+00  -1.0442837e+01   8.1960131e+00
   2.1274674e+01  -2.1308613e+01   2.0000000e+02  -2.3009401e+00  -1.0186944e+01   9.1484153e+00
   2.1143535e+01  -2.1347507e+01   2.0000000e+02  -2.1978739e+00  -9.8341537e+00   1.0069945e+01
   2.1013778e+01  -2.1390331e+01   2.0000000e+02  -2.0659357e+00  -9.3933168e+00   1.0941349e+01
   2.0885538e+01  -2.1437040e+01   2.0000000e+02  -1.9056885e+00  -8.8774910e+00   1.1746250e+01
   2.0758945e+01  -2.1487588e+01   2.0000000e+02  -1.7174836e+00  -8.3026804e+00   1.2472251e+01
   2.0634131e+01  -2.1541921e+01   2.0000000e+02  -1.5014792e+00  -7.6863561e+00   1.3111331e+01
   2.0511225e+01  -2.1599984e+01   2.0000000e+02  -1.2576919e+00  -7.0459516e+00   1.3659775e+01
   2.0390356e+01  -2.1661718e+01   2.0000000e+02  -9.8614377e-01  -6.3976624e+00   1.4117560e+01
   2.0271649e+01  -2.1727059e+01   2.0000000e+02  -6.8702533e-01  -5.7556251e+00   1.4487514e+01
   2.0155228e+01  -2.1795940e+01   2.0000000e+02  -3.6083316e-01  -5.1315666e+00   1.4774378e+01
   2.0041217e+01  -2.1868290e+01   2.0000000e+02  -8.4674044e-03  -4.5348119e+00   1.4983949e+01
   1.9929736e+01  -2.1944034e+01   2.0000000e+02   3.6872888e-01  -3.9725100e+00   1.5122377e+01
   1.9820903e+01  -2.2023094e+01   2.0000000e+02   7.6896129e-01  -3.4500092e+00   1.5195627e+01
   1.9714834e+01  -2.2105388e+01   2.0000000e+02   1.1899610e+00  -2.9712385e+00   1.5209116e+01
   1.9611643e+01  -2.2190831e+01   2.0000000e+02   1.6289339e+00  -2.5390363e+00   1.5167511e+01
   1.9511443e+01  -2.2279334e+01   2.0000000e+02   2.0824596e+00  -2.1553987e+00   1.5074670e+01
   1.9414341e+01  -2.2370806e+01   2.0000000e+02   2.5463936e+00  -1.8216094e+00   1.4933730e+01
   1.9320445e+01  -2.2465151e+01   2.0000000e+02   3.0157810e+00  -1.5383207e+00   1.4747317e+01
   1.9229858e+01  -2.2562272e+01   2.0000000e+02   3.4848946e+00  -1.3055048e+00   1.4517823e+01
   1.9142681e+01  -2.2662066e+01   2.0000000e+02   3.9473429e+00  -1.1223860e+00   1.4247692e+01
   1.9059011e+01  -2.2764431e+01   2.0000000e+02   4.3963469e+00  -9.8735664e-01   1.3939647e+01
   1.8978944e+01  -2.2869257e+01   2.0000000e+02   4.8250110e+00  -8.9794696e-01   1.3596838e+01
   1.8902571e+01  -2.2976436e+01   2.0000000e+02   5.2267182e+00  -8.5088486e-01   1.3222859e+01
   1.8829981e+01  -2.3085855e+01   2.0000000e+02   5.5954425e+00  -8.4227140e-01   1.2821727e+01
   1.8761258e+01  -2.3197399e+01   2.0000000e+02   5.9260856e+00  -8.6784486e-01   1.2397781e+01
   1.8696485e+01  -2.3310949e+01   2.0000000e+02   6.2147655e+00  -9.2330545e-01   1.1955574e+01
   1.8635740e+01  -2.3426387e+01   2.0000000e+02   6.4590622e+00  -1.0046184e+00   1.1499676e+01
   1.8579096e+01  -2.3543589e+01   2.0000000e+02   6.6581298e+00  -1.1082267e+00   1.1034476e+01
   1.8526625e+01  -2.3662432e+01   2.0000000e+02   6.8127168e+00  -1.2311908e+00   1.0563860e+01
   1.8478394e+01  -2.3782787e+01   2.0000000e+02   6.9249331e+00  -1.3711423e+00   1.0090915e+01
   1.8434464e+01  -2.3904529e+01   2.0000000e+02   6.9978461e+00  -1.5261765e+00   9.6175811e+00
   1.8394896e+01  -2.4027524e+01   2.0000000e+02   7.0348684e+00  -1.6946461e+00   9.1445095e+00
   1.8359743e+01  -2.4151643e+01   2.0000000e+02   7.0390591e+00  -1.8749627e+00   8.6710097e+00
   1.8329057e+01  -2.4276751e+01   2.0000000e+02   7.0124617e+00  -2.0654353e+00   8.1953376e+00
   1.8302882e+01  -2.4402714e+01   2.0000000e+02   6.9556059e+00  -2.2641802e+00   7.7151689e+00
   1.8281261e+01  -2.4529395e+01   2.0000000e+02   6.8673330e+00  -2.4691553e+00   7.2282879e+00
   1.8264231e+01  -2.4656656e+01   2.0000000e+02   6.7449545e+00  -2.6782288e+00   6.7333198e+00
   1.8251824e+01  -2.4784360e+01   2.0000000e+02   6.5847548e+00  -2.8893031e+00   6.2303677e+00
   1.8244067e+01  -2.4912367e+01   2.0000000e+02   6.3827243e+00  -3.1004032e+00   5.7214501e+00
   1.8240985e+01  -2.5040537e+01   2.0000000e+02   6.1353627e+00  -3.3097467e+00   5.2106112e+00
   1.8242593e+01  -2.5168729e+01   2.0000000e+02   5.8403931e+00  -3.5156888e+00   4.7037904e+00
   1.8248907e+01  -2.5296802e+01   2.0000000e+02   5.4973370e+00  -3.7167334e+00   4.2084255e+00
   1.8259933e+01  -2.5424615e+01   2.0000000e+02   5.1078757e+00  -3.9114269e+00   3.7329707e+00
   1.8275674e+01  -2.5552025e+01   2.0000000e+02   4.6760850e+00  -4.0983880e+00   3.2862782e+00
   1.8296128e+01  -2.5678892e+01   2.0000000e+02   4.2084933e+00  -4.2763614e+00   2.8768781e+00
   1.8321288e+01  -2.5805073e+01   2.0000000e+02   3.7140121e+00  -4.4443354e+00   2.5121824e+00
   1.8351141e+01  -2.5930428e+01   2.0000000e+02   3.2035895e+00  -4.6016978e+00   2.1975795e+00
   1.8385667e+01  -2.6054815e+01   2.0000000e+02   2.6896082e+00  -4.7483714e+00   1.9355729e+00
   1.8424844e+01  -2.6178095e+01   2.0000000e+02   2.1849264e+00  -4.8849153e+00   1.7250454e+00
   1.8468642e+01  -2.6300127e+01   2.0000000e+02   1.7017184e+00  -5.0124607e+00   1.5609006e+00
   1.8517026e+01  -2.6420775e+01   2.0000000e+02   1.2501723e+00  -5.1325534e+00   1.4341176e+00
   1.8569957e+01  -2.6539900e+01   2.0000000e+02   8.3734768e-01  -5.2468587e+00   1.3323158e+00
   1.8627387e+01  -2.6657366e+01   2.0000000e+02   4.6628245e-01  -5.3567291e+00   1.2408065e+00
   1.8689266e+01  -2.6773038e+01   2.0000000e+02   1.3556368e-01  -5.4627837e+00   1.1439584e+00
   1.8755537e+01  -2.6886784e+01   2.0000000e+02  -1.6058101e-01  -5.5644723e+00   1.0268037e+00
   1.8826136e+01  -2.6998473e+01   2.0000000e+02  -4.3166910e-01  -5.6598009e+00   8.7662948e-01
   1.8900996e+01  -2.7107974e+01   2.0000000e+02  -6.8991938e-01  -5.7452959e+00   6.8437096e-01
   1.8980042e+01  -2.7215161e+01   2.0000000e+02  -9.4888999e-01  -5.8162055e+00   4.4568507e-01
   1.9063196e+01  -2.7319909e+01   2.0000000e+02  -1.2219680e+00  -5.8670491e+00   1.6147342e-01
   1.9150371e+01  -2.7422096e+01   2.0000000e+02  -1.5208663e+00  -5.8923693e+00  -1.6214607e-01
   1.9241478e+01  -2.7521601e+01   2.0000000e+02  -1.8543208e+00  -5.8876756e+00  -5.1457108e-01
   1.9336421e+01  -2.7618308e+01   2.0000000e+02  -2.2271014e+00  -5.8503067e+00  -8.8201676e-01
   1.9435097e+01  -2.7712102e+01   2.0000000e+02  -2.6394777e+00  -5.7801020e+00  -1.2493503e+00
   1.9537402e+01  -2.7802872e+01   2.0000000e+02  -3.0872549e+00  -5.6796416e+00  -1.6022372e+00
   1.9643223e+01  -2.7890511e+01   2.0000000e+02  -3.5623371e+00  -5.5539075e+00  -1.9291989e+00
   1.9752443e+01  -2.7974914e+01   2.0000000e+02  -4.0538194e+00  -5.4093975e+00  -2.2233249e+00
   1.9864941e+01  -2.8055980e+01   2.0000000e+02  -4.5494089e+00  -5.2527491e+00  -2.4831940e+00
   1.9980590e+01  -2.8133613e+01   2.0000000e+02  -5.0369159e+00  -5.0891619e+00  -2.7127720e+00
   2.0099259e+01  -2.8207718e+01   2.0000000e+02  -5.5055268e+00  -4.9209910e+00  -2.9202858e+00
   2.0220812e+01  -2.8278208e+01   2.0000000e+02  -5.9466196e+00  -4.7468246e+00  -3.1162168e+00
   2.0345108e+01  -2.8344997e+01   2.0000000e+02  -6.3539380e+00  -4.5613764e+00  -3.3109561e+00
   2.0472005e+01  -2.8408004e+01   2.0000000e+02  -6.7232253e+00  -4.3561683e+00  -3.5126165e+00
   2.0601352e+01  -2.8467152e+01   2.0000000e+02  -7.0514549e+00  -4.1208648e+00  -3.7254945e+00
   2.0732999e+01  -2.8522371e+01   2.0000000e+02  -7.3360358e+00  -3.8448405e+00  -3.9495314e+00
   2.0866788e+01  -2.8573592e+01   2.0000000e+02  -7.5741856e+00  -3.5185826e+00  -4.1806580e+00
   2.1002562e+01  -2.8620753e+01   2.0000000e+02  -7.7627547e+00  -3.1345008e+00  -4.4117223e+00
   2.1140158e+01  -2.8663798e+01   2.0000000e+02  -7.8984391e+00  -2.6870982e+00  -4.6334718e+00
   2.1279410e+01  -2.8702672e+01   2.0000000e+02  -7.9783093e+00  -2.1725971e+00  -4.8352138e+00
   2.1420151e+01  -2.8737329e+01   2.0000000e+02  -8.0004828e+00  -1.5884179e+00  -5.0047527e+00
   2.1562211e+01  -2.8767726e+01   2.0000000e+02  -7.9647022e+00  -9.3303109e-01  -5.1278185e+00
   2.1705417e+01  -2.8793825e+01   2.0000000e+02  -7.8727360e+00  -2.0655245e-01  -5.1872845e+00
   2.1849595e+01  -2.8815595e+01   2.0000000e+02  -7.7285325e+00   5.8779927e-01  -5.1628344e+00
   2.1994569e+01  -2.8833009e+01   2.0000000e+02  -7.5381451e+00   1.4416456e+00  -5.0317215e+00
   2.2140162e+01  -2.8846046e+01   2.0000000e+02  -7.3095040e+00   2.3394675e+00  -4.7709492e+00
   2.2286196e+01  -2.8854688e+01   2.0000000e+02  -7.0520767e+00   3.2575609e+00  -4.3607920e+00
   2.2432492e+01  -2.8858927e+01   2.0000000e+02  -6.7764561e+00   4.1646499e+00  -3.7889115e+00
   2.2578871e+01  -2.8858755e+01   2.0000000e+02  -6.4938276e+00   5.0244932e+00  -3.0540604e+00
   2.2725153e+01  -2.8854175e+01   2.0000000e+02  -6.2153470e+00   5.8000044e+00  -2.1681226e+00
   2.3482750e+01  -2.8890663e+01   2.0000000e+02  -4.8038235e+00   7.3475134e+00   3.8313957e+00
   2.3625094e+01  -2.8859884e+01   2.0000000e+02  -4.6490947e+00   7.2411075e+00   4.8813546e+00
   2.3766142e+01  -2.8824969e+01   2.0000000e+02  -4.5319729e+00   7.0221931e+00   5.8406771e+00
   2.3905735e+01  -2.8785956e+01   2.0000000e+02  -4.4480688e+00   6.7159964e+00   6.6924426e+00
   2.4043712e+01  -2.8742890e+01   2.0000000e+02  -4.3920244e+00   6.3480260e+00   7.4281351e+00
   2.4179920e+01  -2.8695823e+01   2.0000000e+02  -4.3583581e+00   5.9419813e+00   8.0466258e+00
   2.4314203e+01  -2.8644807e+01   2.0000000e+02  -4.3422240e+00   5.5183497e+00   8.5525193e+00
   2.4446412e+01  -2.8589902e+01   2.0000000e+02  -4.3398383e+00   5.0935723e+00   8.9544185e+00
   2.4576399e+01  -2.8531171e+01   2.0000000e+02  -4.3487070e+00   4.6799048e+00   9.2631365e+00
   2.4704021e+01  -2.8468680e+01   2.0000000e+02  -4.3675808e+00   4.2857169e+00   9.4902136e+00
   2.4829135e+01  -2.8402501e+01   2.0000000e+02  -4.3962497e+00   3.9161243e+00   9.6467674e+00
   2.4951607e+01  -2.8332709e+01   2.0000000e+02  -4.4352484e+00   3.5737018e+00   9.7427260e+00
   2.5071302e+01  -2.8259385e+01   2.0000000e+02  -4.4855344e+00   3.2592724e+00   9.7863255e+00
   2.5188091e+01  -2.8182611e+01   2.0000000e+02  -4.5481425e+00   2.9725966e+00   9.7838734e+00
   2.5301850e+01  -2.8102474e+01   2.0000000e+02  -4.6238053e+00   2.7130151e+00   9.7397412e+00
   2.5412458e+01  -2.8019064e+01   2.0000000e+02  -4.7126274e+00   2.4800246e+00   9.6566112e+00
   2.5519799e+01  -2.7932477e+01   2.0000000e+02  -4.8138389e+00   2.2736857e+00   9.5360203e+00
   2.5623761e+01  -2.7842807e+01   2.0000000e+02  -4.9258126e+00   2.0948362e+00   9.3790986e+00
   2.5724237e+01  -2.7750157e+01   2.0000000e+02  -5.0462944e+00   1.9449455e+00   9.1873963e+00
   2.5821125e+01  -2.7654630e+01   2.0000000e+02  -5.1729802e+00   1.8257111e+00   8.9634580e+00
   2.5914327e+01  -2.7556331e+01   2.0000000e+02  -5.3041856e+00   1.7384240e+00   8.7109750e+00
   2.6003751e+01  -2.7455370e+01   2.0000000e+02  -5.4394134e+00   1.6832970e+00   8.4343867e+00
   2.6089309e+01  -2.7351859e+01   2.0000000e+02  -5.5796095e+00   1.6589973e+00   8.1379908e+00
   2.6170918e+01  -2.7245912e+01   2.0000000e+02  -5.7268919e+00   1.6624873e+00   7.8248522e+00
   2.6248502e+01  -2.7137645e+01   2.0000000e+02  -5.8837478e+00   1.6892402e+00   7.4958769e+00
   2.6321987e+01  -2.7027176e+01   2.0000000e+02  -6.0518738e+00   1.7337845e+00   7.1494094e+00
   2.6391306e+01  -2.6914627e+01   2.0000000e+02  -6.2309445e+00   1.7903829e+00   6.7815857e+00
   2.6456397e+01  -2.6800120e+01   2.0000000e+02  -6.4177502e+00   1.8537153e+00   6.3873936e+00
   2.6517203e+01  -2.6683778e+01   2.0000000e+02  -6.6059767e+00   1.9193544e+00   5.9622136e+00
   2.6573672e+01  -2.6565729e+01   2.0000000e+02  -6.7867686e+00   1.9839518e+00   5.5033967e+00
   2.6625757e+01  -2.6446098e+01   2.0000000e+02  -6.9499835e+00   2.0451597e+00   5.0113557e+00
   2.6673417e+01  -2.6325015e+01   2.0000000e+02  -7.0857341e+00   2.1013439e+00   4.4899725e+00
   2.6716615e+01  -2.6202608e+01   2.0000000e+02  -7.1858579e+00   2.1512815e+00   3.9461324e+00
   2.6755319e+01  -2.6079009e+01   2.0000000e+02  -7.2448959e+00   2.1939369e+00   3.3887222e+00
   2.6789504e+01  -2.5954348e+01   2.0000000e+02  -7.2604485e+00   2.2284211e+00   2.8273521e+00
   2.6819147e+01  -2.5828758e+01   2.0000000e+02  -7.2329457e+00   2.2541160e+00   2.2712888e+00
   2.6844232e+01  -2.5702371e+01   2.0000000e+02  -7.1650832e+00   2.2708939e+00   1.7287741e+00
   2.6864748e+01  -2.5575320e+01   2.0000000e+02  -7.0612379e+00   2.2793369e+00   1.2068062e+00
   2.6880688e+01  -2.5447738e+01   2.0000000e+02  -6.9270922e+00   2.2808653e+00   7.1115597e-01
   2.6892049e+01  -2.5319759e+01   2.0000000e+02  -6.7695134e+00   2.2777178e+00   2.4634401e-01
   2.6898836e+01  -2.5191515e+01   2.0000000e+02  -6.5965161e+00   2.2727682e+00  -1.8467636e-01
   2.6901055e+01  -2.5063141e+01   2.0000000e+02  -6.4170431e+00   2.2691893e+00  -5.8112197e-01
   2.6898718e+01  -2.4934768e+01   2.0000000e+02  -6.2403157e+00   2.2699850e+00  -9.4510385e-01
   2.6891843e+01  -2.4806529e+01   2.0000000e+02  -6.0747535e+00   2.2774281e+00  -1.2820525e+00
   2.6880449e+01  -2.4678557e+01   2.0000000e+02  -5.9266304e+00   2.2924535e+00  -1.6005984e+00
   2.6864563e+01  -2.4550981e+01   2.0000000e+02  -5.7988018e+00   2.3141008e+00  -1.9117397e+00
   2.6844215e+01  -2.4423934e+01   2.0000000e+02  -5.6898589e+00   2.3391153e+00  -2.2273608e+00
   2.6819438e+01  -2.4297543e+01   2.0000000e+02  -5.5939109e+00   2.3618456e+00  -2.5584121e+00
   2.6790271e+01  -2.4171938e+01   2.0000000e+02  -5.5011400e+00   2.3745322e+00  -2.9129855e+00
   2.6756755e+01  -2.4047245e+01   2.0000000e+02  -5.3990783e+00   2.3680155e+00  -3.2947260e+00
   2.6718937e+01  -2.3923592e+01   2.0000000e+02  -5.2744872e+00   2.3327877e+00  -3.7018203e+00
   2.6676867e+01  -2.3801102e+01   2.0000000e+02  -5.1155501e+00   2.2601980e+00  -4.1269171e+00
   2.6630600e+01  -2.3679898e+01   2.0000000e+02  -4.9139974e+00   2.1435634e+00  -4.5580315e+00
   2.6580191e+01  -2.3560103e+01   2.0000000e+02  -4.6666729e+00   1.9789251e+00  -4.9804175e+00
   2.6525703e+01  -2.3441835e+01   2.0000000e+02  -4.3761245e+00   1.7652858e+00  -5.3790120e+00
   2.6467201e+01  -2.3325214e+01   2.0000000e+02  -4.0500167e+00   1.5042954e+00  -5.7408953e+00
   2.6404752e+01  -2.3210354e+01   2.0000000e+02  -3.6994368e+00   1.1994989e+00  -6.0571613e+00
   2.6338428e+01  -2.3097370e+01   2.0000000e+02  -3.3365936e+00   8.5543592e-01  -6.3236613e+00
   2.6268304e+01  -2.2986375e+01   2.0000000e+02  -2.9724681e+00   4.7682290e-01  -6.5405557e+00
   2.6194458e+01  -2.2877477e+01   2.0000000e+02  -2.6150516e+00   6.8053752e-02  -6.7108650e+00
   2.6116972e+01  -2.2770784e+01   2.0000000e+02  -2.2685694e+00  -3.6687327e-01  -6.8385445e+00
   2.6035928e+01  -2.2666402e+01   2.0000000e+02  -1.9337120e+00  -8.2411201e-01  -6.9267029e+00
   2.5951415e+01  -2.2564433e+01   2.0000000e+02  -1.6086987e+00  -1.2995334e+00  -6.9764125e+00
   2.5863521e+01  -2.2464976e+01   2.0000000e+02  -1.2906959e+00  -1.7883343e+00  -6.9863600e+00
   2.5772340e+01  -2.2368131e+01   2.0000000e+02  -9.7722695e-01  -2.2847779e+00  -6.9532486e+00
   2.5677967e+01  -2.2273990e+01   2.0000000e+02  -6.6717611e-01  -2.7822202e+00  -6.8726993e+00
   2.5580500e+01  -2.2182646e+01   2.0000000e+02  -3.6132258e-01  -3.2732412e+00  -6.7403250e+00
   2.5480038e+01  -2.2094189e+01   2.0000000e+02  -6.2396165e-02  -3.7499075e+00  -6.5527164e+00
   2.5376684e+01  -2.2008704e+01   2.0000000e+02   2.2516586e-01  -4.2040242e+00  -6.3082265e+00
   2.5270544e+01  -2.1926274e+01   2.0000000e+02   4.9562867e-01  -4.6273733e+00  -6.0075515e+00
   2.5161723e+01  -2.1846979e+01   2.0000000e+02   7.4242214e-01  -5.0120236e+00  -5.6541459e+00
   2.5050331e+01  -2.1770896e+01   2.0000000e+02   9.5858109e-01  -5.3507665e+00  -5.2545239e+00
   2.4936480e+01  -2.1698100e+01   2.0000000e+02   1.1372217e+00  -5.6377871e+00  -4.8183567e+00
   2.4820282e+01  -2.1628659e+01   2.0000000e+02   1.2720430e+00  -5.8695410e+00  -4.3582404e+00
   2.4701851e+01  -2.1562642e+01   2.0000000e+02   1.3578507e+00  -6.0456657e+00  -3.8890490e+00
   2.4581305e+01  -2.1500112e+01   2.0000000e+02   1.3910576e+00  -6.1697489e+00  -3.4267507e+00
   2.4458761e+01  -2.1441130e+01   2.0000000e+02   1.3700879e+00  -6.2496476e+00  -2.9867959e+00
   2.4334339e+01  -2.1385751e+01   2.0000000e+02   1.2955752e+00  -6.2971695e+00  -2.5823216e+00
   2.4208160e+01  -2.1334030e+01   2.0000000e+02   1.1703310e+00  -6.3270682e+00  -2.2225153e+00
   2.4080347e+01  -2.1286017e+01   2.0000000e+02   9.9906074e-01  -6.3554899e+00  -1.9114697e+00
   2.3951023e+01  -2.1241756e+01   2.0000000e+02   7.8790825e-01  -6.3981734e+00  -1.6477927e+00
   2.3820312e+01  -2.1201292e+01   2.0000000e+02   5.4395051e-01  -6.4687932e+00  -1.4250255e+00
   2.3688341e+01  -2.1164662e+01   2.0000000e+02   2.7470978e-01  -6.5777357e+00  -1.2326606e+00
   2.3555235e+01  -2.1131903e+01   2.0000000e+02  -1.2203509e-02  -6.7315173e+00  -1.0574823e+00
   2.3421124e+01  -2.1103045e+01   2.0000000e+02  -3.0933436e-01  -6.9327416e+00  -8.8489721e-01
   2.3286135e+01  -2.1078115e+01   2.0000000e+02  -6.0953859e-01  -7.1804914e+00  -7.0001378e-01
   2.3150396e+01  -2.1057139e+01   2.0000000e+02  -9.0608571e-01  -7.4708649e+00  -4.8841730e-01
   2.3014039e+01  -2.1040136e+01   2.0000000e+02  -1.1927860e+00  -7.7974735e+00  -2.3669966e-01
   2.2877192e+01  -2.1027122e+01   2.0000000e+02  -1.4641370e+00  -8.1518901e+00   6.7178618e-02
   2.2739985e+01  -2.1018110e+01   2.0000000e+02  -1.7154555e+00  -8.5239581e+00   4.3354672e-01
   2.2602551e+01  -2.1013108e+01   2.0000000e+02  -1.9429902e+00  -8.9020589e+00   8.7067841e-01
   2.2465019e+01  -2.1012121e+01   2.0000000e+02  -2.1439666e+00  -9.2734059e+00   1.3844824e+00
   2.2327520e+01  -2.1015150e+01   2.0000000e+02  -2.3165211e+00  -9.6243136e+00   1.9781660e+00
   2.2190185e+01  -2.1022193e+01   2.0000000e+02  -2.4595552e+00  -9.9405226e+00   2.6519515e+00
   2.2053146e+01  -2.1033242e+01   2.0000000e+02  -2.5725374e+00  -1.0207565e+01   3.4027934e+00
   2.1916531e+01  -2.1048287e+01   2.0000000e+02  -2.6552969e+00  -1.0411249e+01   4.2241778e+00
   2.1780472e+01  -2.1067314e+01   2.0000000e+02  -2.7078660e+00  -1.0538283e+01   5.1059069e+00
   2.1645099e+01  -2.1090304e+01   2.0000000e+02  -2.7304132e+00  -1.0577121e+01   6.0341279e+00
   2.1510540e+01  -2.1117235e+01   2.0000000e+02  -2.7232343e+00  -1.0518983e+01   6.9916484e+00
   2.1376925e+01  -2.1148081e+01   2.0000000e+02  -2.6867845e+00  -1.0358896e+01   7.9586353e+00
   2.1244380e+01  -2.1182813e+01   2.0000000e+02  -2.6216938e+00  -1.0096567e+01   8.9138414e+00
   2.1113034e+01  -2.1221398e+01   2.0000000e+02  -2.5287317e+00  -9.7368193e+00   9.8360966e+00
   2.0983013e+01  -2.1263798e+01   2.0000000e+02  -2.4087113e+00  -9.2894133e+00   1.0706005e+01
   2.0854442e+01  -2.1309973e+01   2.0000000e+02  -2.2623429e+00  -8.7682176e+00   1.1507414e+01
   2.0727444e+01  -2.1359879e+01   2.0000000e+02  -2.0901123e+00  -8.1898643e+00   1.2228428e+01
   2.0602144e+01  -2.1413467e+01   2.0000000e+02  -1.8922261e+00  -7.5721763e+00   1.2861773e+01
   2.0478663e+01  -2.1470685e+01   2.0000000e+02  -1.6686474e+00  -6.9326070e+00   1.3404611e+01
   2.0357120e+01  -2.1531480e+01   2.0000000e+02  -1.4192318e+00  -6.2870277e+00   1.3857831e+01
   2.0237635e+01  -2.1595791e+01   2.0000000e+02  -1.1439524e+00  -5.6489868e+00   1.4225089e+01
   2.0120326e+01  -2.1663558e+01   2.0000000e+02  -8.4306983e-01  -5.0294008e+00   1.4511862e+01
   2.0005307e+01  -2.1734714e+01   2.0000000e+02  -5.1729757e-01  -4.4366418e+00   1.4724580e+01
   1.9892693e+01  -2.1809191e+01   2.0000000e+02  -1.6783710e-01  -3.8768929e+00   1.4869967e+01
   1.9782595e+01  -2.1886917e+01   2.0000000e+02   2.0364141e-01  -3.3545589e+00   1.4954565e+01
   1.9675124e+01  -2.1967816e+01   2.0000000e+02   5.9506204e-01  -2.8727090e+00   1.4984412e+01
   1.9570388e+01  -2.2051811e+01   2.0000000e+02   1.0040103e+00  -2.4334153e+00   1.4964826e+01
   1.9468492e+01  -2.2138818e+01   2.0000000e+02   1.4277089e+00  -2.0380217e+00   1.4900272e+01
   1.9369541e+01  -2.2228755e+01   2.0000000e+02   1.8629963e+00  -1.6873264e+00   1.4794351e+01
   1.9273635e+01  -2.2321533e+01   2.0000000e+02   2.3061992e+00  -1.3816645e+00   1.4649858e+01
   1.9180874e+01  -2.2417061e+01   2.0000000e+02   2.7530807e+00  -1.1209421e+00   1.4468972e+01
   1.9091353e+01  -2.2515247e+01   2.0000000e+02   3.1988377e+00  -9.0457959e-01   1.4253480e+01
   1.9005168e+01  -2.2615993e+01   2.0000000e+02   3.6381565e+00  -7.3144723e-01   1.4005035e+01
   1.8922409e+01  -2.2719203e+01   2.0000000e+02   4.0654033e+00  -5.9977592e-01   1.3725334e+01
   1.8843164e+01  -2.2824773e+01   2.0000000e+02   4.4747811e+00  -5.0714670e-01   1.3416269e+01
   1.8767518e+01  -2.2932601e+01   2.0000000e+02   4.8606018e+00  -4.5057148e-01   1.3079995e+01
   1.8695556e+01  -2.3042579e+01   2.0000000e+02   5.2174937e+00  -4.2667318e-01   1.2718993e+01
   1.8627356e+01  -2.3154600e+01   2.0000000e+02   5.5406787e+00  -4.3193186e-01   1.2336090e+01
   1.8562994e+01  -2.3268552e+01   2.0000000e+02   5.8262282e+00  -4.6296477e-01   1.1934503e+01
   1.8502543e+01  -2.3384322e+01   2.0000000e+02   6.0713576e+00  -5.1676393e-01   1.1517800e+01
   1.8446075e+01  -2.3501796e+01   2.0000000e+02   6.2746681e+00  -5.9084322e-01   1.1089773e+01
   1.8393654e+01  -2.3620856e+01   2.0000000e+02   6.4362559e+00  -6.8322935e-01   1.0654184e+01
   1.8345344e+01  -2.3741382e+01   2.0000000e+02   6.5576793e+00  -7.9239071e-01   1.0214405e+01
   1.8301205e+01  -2.3863256e+01   2.0000000e+02   6.6416678e+00  -9.1705897e-01   9.7729714e+00
   1.8261291e+01  -2.3986353e+01   2.0000000e+02   6.6915799e+00  -1.0559996e+00   9.3312543e+00
   1.8225656e+01  -2.4110551e+01   2.0000000e+02   6.7107405e+00  -1.2078910e+00   8.8892275e+00
   1.8194347e+01  -2.4235723e+01   2.0000000e+02   6.7016819e+00  -1.3711908e+00   8.4455722e+00
   1.8167407e+01  -2.4361744e+01   2.0000000e+02   6.6655359e+00  -1.5441708e+00   7.9980338e+00
   1.8144879e+01  -2.4488485e+01   2.0000000e+02   6.6016830e+00  -1.7250141e+00   7.5440894e+00
   1.8126796e+01  -2.4615817e+01   2.0000000e+02   6.5077481e+00  -1.9119155e+00   7.0817367e+00
   1.8113192e+01  -2.4743611e+01   2.0000000e+02   6.3800203e+00  -2.1032589e+00   6.6102581e+00
   1.8104094e+01  -2.4871735e+01   2.0000000e+02   6.2141424e+00  -2.2976414e+00   6.1308137e+00
   1.8099525e+01  -2.5000059e+01   2.0000000e+02   6.0059609e+00  -2.4938795e+00   5.6466809e+00
   1.8099504e+01  -2.5128449e+01   2.0000000e+02   5.7523512e+00  -2.6909011e+00   5.1632018e+00
   1.8104045e+01  -2.5256773e+01   2.0000000e+02   5.4518624e+00  -2.8876106e+00   4.6874110e+00
   1.8113158e+01  -2.5384899e+01   2.0000000e+02   5.1051628e+00  -3.0827609e+00   4.2275150e+00
   1.8126848e+01  -2.5512693e+01   2.0000000e+02   4.7152894e+00  -3.2748802e+00   3.7922770e+00
   1.8145116e+01  -2.5640021e+01   2.0000000e+02   4.2877322e+00  -3.4623115e+00   3.3903179e+00
   1.8167958e+01  -2.5766751e+01   2.0000000e+02   3.8303616e+00  -3.6433397e+00   3.0293591e+00
   1.8195363e+01  -2.5892749e+01   2.0000000e+02   3.3531910e+00  -3.8163812e+00   2.7154257e+00
   1.8227318e+01  -2.6017883e+01   2.0000000e+02   2.8678625e+00  -3.9802374e+00   2.4520096e+00
   1.8263805e+01  -2.6142020e+01   2.0000000e+02   2.3868668e+00  -4.1342666e+00   2.2393768e+00
   1.8304799e+01  -2.6265030e+01   2.0000000e+02   1.9224797e+00  -4.2784798e+00   2.0741166e+00
   1.8350270e+01  -2.6386779e+01   2.0000000e+02   1.4855912e+00  -4.4135429e+00   1.9490646e+00
   1.8400186e+01  -2.6507140e+01   2.0000000e+02   1.0844858e+00  -4.5406447e+00   1.8536561e+00
   1.8454507e+01  -2.6625982e+01   2.0000000e+02   7.2391197e-01  -4.6612098e+00   1.7747374e+00
   1.8513188e+01  -2.6743179e+01   2.0000000e+02   4.0444294e-01  -4.7765402e+00   1.6976983e+00
   1.8576181e+01  -2.6858603e+01   2.0000000e+02   1.2233990e-01  -4.8874108e+00   1.6078189e+00
   1.8643430e+01  -2.6972130e+01   2.0000000e+02  -1.3012598e-01  -4.9936368e+00   1.4917159e+00
   1.8714876e+01  -2.7083636e+01   2.0000000e+02  -3.6389944e-01  -5.0937955e+00   1.3386721e+00
   1.8790455e+01  -2.7192999e+01   2.0000000e+02  -5.9202422e-01  -5.1850965e+00   1.1417726e+00
   1.8870096e+01  -2.7300101e+01   2.0000000e+02  -8.2830219e-01  -5.2635052e+00   8.9870321e-01
   1.8953724e+01  -2.7404824e+01   2.0000000e+02  -1.0858764e+00  -5.3241797e+00   6.1209448e-01
   1.9041259e+01  -2.7507052e+01   2.0000000e+02  -1.3758720e+00  -5.3621428e+00   2.8937534e-01
   1.9132616e+01  -2.7606672e+01   2.0000000e+02  -1.7062247e+00  -5.3731328e+00  -5.7930230e-02
   1.9227705e+01  -2.7703575e+01   2.0000000e+02  -2.0808223e+00  -5.3544756e+00  -4.1545409e-01
   1.9326430e+01  -2.7797652e+01   2.0000000e+02  -2.4990597e+00  -5.3058032e+00  -7.6770041e-01
   1.9428692e+01  -2.7888798e+01   2.0000000e+02  -2.9559244e+00  -5.2293931e+00  -1.1000706e+00
   1.9534387e+01  -2.7976912e+01   2.0000000e+02  -3.4426077e+00  -5.1299916e+00  -1.4008806e+00
   1.9643403e+01  -2.8061895e+01   2.0000000e+02  -3.9475906e+00  -5.0140755e+00  -1.6630415e+00
   1.9755629e+01  -2.8143652e+01   2.0000000e+02  -4.4581028e+00  -4.8886284e+00  -1.8850939e+00
   1.9870945e+01  -2.8222089e+01   2.0000000e+02  -4.9615987e+00  -4.7596295e+00  -2.0712357e+00
   1.9989228e+01  -2.8297119e+01   2.0000000e+02  -5.4470933e+00  -4.6305889e+00  -2.2303643e+00
   2.0110352e+01  -2.8368657e+01   2.0000000e+02  -5.9059823e+00  -4.5015121e+00  -2.3742600e+00
   2.0234185e+01  -2.8436620e+01   2.0000000e+02  -6.3322512e+00  -4.3685290e+00  -2.5152898e+00
   2.0360592e+01  -2.8500932e+01   2.0000000e+02  -6.7221088e+00  -4.2243006e+00  -2.6641603e+00
   2.0489434e+01  -2.8561520e+01   2.0000000e+02  -7.0731777e+00  -4.0591140e+00  -2.8282392e+00
   2.0620570e+01  -2.8618313e+01   2.0000000e+02  -7.3835732e+00  -3.8623221e+00  -3.0107401e+00
   2.0753853e+01  -2.8671247e+01   2.0000000e+02  -7.6511507e+00  -3.6237279e+00  -3.2107458e+00
   2.0889134e+01  -2.8720262e+01   2.0000000e+02  -7.8731159e+00  -3.3345681e+00  -3.4239534e+00
   2.1026261e+01  -2.8765300e+01   2.0000000e+02  -8.0460545e+00  -2.9878712e+00  -3.6436343e+00
   2.1165080e+01  -2.8806309e+01   2.0000000e+02  -8.1663246e+00  -2.5782244e+00  -3.8613391e+00
   2.1305433e+01  -2.8843244e+01   2.0000000e+02  -8.2306361e+00  -2.1012467e+00  -4.0670493e+00
   2.1447160e+01  -2.8876060e+01   2.0000000e+02  -8.2366433e+00  -1.5531792e+00  -4.2487560e+00
   2.1590100e+01  -2.8904720e+01   2.0000000e+02  -8.1834522e+00  -9.3104753e-01  -4.3915243e+00
   2.1734090e+01  -2.8929190e+01   2.0000000e+02  -8.0719373e+00  -2.3369642e-01  -4.4767136e+00
   2.1878962e+01  -2.8949443e+01   2.0000000e+02  -7.9049150e+00   5.3632210e-01  -4.4818562e+00
   2.2024552e+01  -2.8965454e+01   2.0000000e+02  -7.6871697e+00   1.3705198e+00  -4.3818669e+00
   2.2170691e+01  -2.8977206e+01   2.0000000e+02  -7.4254544e+00   2.2524557e+00  -4.1516585e+00
   2.2317210e+01  -2.8984684e+01   2.0000000e+02  -7.1283992e+00   3.1569900e+00  -3.7700515e+00
   2.2463940e+01  -2.8987880e+01   2.0000000e+02  -6.8063343e+00   4.0513028e+00  -3.2240230e+00
   2.2610713e+01  -2.8986789e+01   2.0000000e+02  -6.4709059e+00   4.8978706e+00  -2.5122777e+00
   2.2757357e+01  -2.8981415e+01   2.0000000e+02  -6.1344590e+00   5.6588028e+00  -1.6470532e+00
   2.2903704e+01  -2.8971761e+01   2.0000000e+02  -5.8091451e+00   6.3007033e+00  -6.5357529e-01
   2.3049584e+01  -2.8957841e+01   2.0000000e+02  -5.5059516e+00   6.7986732e+00   4.3269484e-01
   2.3194830e+01  -2.8939670e+01   2.0000000e+02  -5.2337688e+00   7.1388528e+00   1.5703021e+00
   2.3339274e+01  -2.8917268e+01   2.0000000e+02  -4.9987193e+00   7.3190141e+00   2.7164768e+00
   2.4096253e+01  -2.8862791e+01   2.0000000e+02  -3.8512306e+00   5.9428261e+00   7.8331269e+00
   2.4232789e+01  -2.8815636e+01   2.0000000e+02  -3.7953838e+00   5.5151422e+00   8.4253715e+00
   2.4367451e+01  -2.8764641e+01   2.0000000e+02  -3.7616995e+00   5.0721103e+00   8.9063662e+00
   2.4500096e+01  -2.8709861e+01   2.0000000e+02  -3.7461045e+00   4.6303423e+00   9.2848326e+00
   2.4630585e+01  -2.8651355e+01   2.0000000e+02  -3.7457550e+00   4.2022547e+00   9.5718318e+00
   2.4758781e+01  -2.8589188e+01   2.0000000e+02  -3.7589759e+00   3.7963248e+00   9.7792680e+00
   2.4884551e+01  -2.8523425e+01   2.0000000e+02  -3.7850715e+00   3.4176676e+00   9.9187313e+00
   2.5007765e+01  -2.8454138e+01   2.0000000e+02  -3.8240247e+00   3.0687489e+00   1.0000692e+01
   2.5128297e+01  -2.8381402e+01   2.0000000e+02  -3.8762311e+00   2.7501394e+00   1.0033976e+01
   2.5246025e+01  -2.8305293e+01   2.0000000e+02  -3.9422304e+00   2.4612370e+00   1.0025461e+01
   2.5360828e+01  -2.8225895e+01   2.0000000e+02  -4.0223942e+00   2.2009340e+00   9.9799839e+00
   2.5472593e+01  -2.8143290e+01   2.0000000e+02  -4.1166536e+00   1.9682261e+00   9.9004675e+00
   2.5581209e+01  -2.8057568e+01   2.0000000e+02  -4.2242169e+00   1.7627208e+00   9.7883583e+00
   2.5686569e+01  -2.7968819e+01   2.0000000e+02  -4.3434882e+00   1.5849523e+00   9.6443225e+00
   2.5788570e+01  -2.7877136e+01   2.0000000e+02  -4.4721963e+00   1.4363762e+00   9.4691111e+00
   2.5887114e+01  -2.7782618e+01   2.0000000e+02  -4.6078122e+00   1.3190136e+00   9.2643444e+00
   2.5982109e+01  -2.7685362e+01   2.0000000e+02  -4.7482187e+00   1.2348356e+00   9.0329208e+00
   2.6073464e+01  -2.7585471e+01   2.0000000e+02  -4.8923674e+00   1.1850118e+00   8.7789152e+00
   2.6161095e+01  -2.7483050e+01   2.0000000e+02  -5.0407452e+00   1.1692452e+00   8.5068868e+00
   2.6244923e+01  -2.7378205e+01   2.0000000e+02  -5.1954189e+00   1.1854096e+00   8.2207979e+00
   2.6324871e+01  -2.7271044e+01   2.0000000e+02  -5.3595302e+00   1.2295694e+00   7.9228635e+00
   2.6400870e+01  -2.7161679e+01   2.0000000e+02  -5.5362645e+00   1.2963519e+00   7.6127092e+00
   2.6472853e+01  -2.7050223e+01   2.0000000e+02  -5.7275690e+00   1.3796304e+00   7.2871498e+00
   2.6540758e+01  -2.6936789e+01   2.0000000e+02  -5.9329046e+00   1.4732753e+00   6.9407642e+00
   2.6604530e+01  -2.6821495e+01   2.0000000e+02  -6.1484327e+00   1.5718007e+00   6.5672026e+00
   2.6664117e+01  -2.6704458e+01   2.0000000e+02  -6.3669835e+00   1.6707963e+00   6.1608423e+00
   2.6719472e+01  -2.6585797e+01   2.0000000e+02  -6.5788024e+00   1.7670162e+00   5.7183865e+00
   2.6770551e+01  -2.6465632e+01   2.0000000e+02  -6.7729447e+00   1.8582095e+00   5.2399064e+00
   2.6817318e+01  -2.6344085e+01   2.0000000e+02  -6.9389058e+00   1.9427918e+00   4.7290856e+00
   2.6859740e+01  -2.6221278e+01   2.0000000e+02  -7.0680773e+00   2.0195400e+00   4.1926363e+00
   2.6897788e+01  -2.6097334e+01   2.0000000e+02  -7.1546557e+00   2.0874076e+00   3.6391942e+00
   2.6931439e+01  -2.5972378e+01   2.0000000e+02  -7.1958924e+00   2.1455200e+00   3.0780802e+00
   2.6960673e+01  -2.5846533e+01   2.0000000e+02  -7.1917881e+00   2.1933218e+00   2.5182780e+00
   2.6985477e+01  -2.5719925e+01   2.0000000e+02  -7.1444862e+00   2.2307759e+00   1.9679292e+00
   2.7005839e+01  -2.5592680e+01   2.0000000e+02  -7.0577065e+00   2.2585389e+00   1.4342294e+00
   2.7021754e+01  -2.5464922e+01   2.0000000e+02  -6.9364280e+00   2.2780343e+00   9.2357362e-01
   2.7033221e+01  -2.5336777e+01   2.0000000e+02  -6.7868788e+00   2.2914039e+00   4.4162068e-01
   2.7040243e+01  -2.5208372e+01   2.0000000e+02  -6.6166489e+00   2.3013437e+00  -7.0087975e-03
   2.7042827e+01  -2.5079831e+01   2.0000000e+02  -6.4346318e+00   2.3108345e+00  -4.1943290e-01
   2.7040984e+01  -2.4951279e+01   2.0000000e+02  -6.2505624e+00   2.3227732e+00  -7.9537042e-01
   2.7034731e+01  -2.4822841e+01   2.0000000e+02  -6.0740631e+00   2.3395095e+00  -1.1378639e+00
   2.7024088e+01  -2.4694643e+01   2.0000000e+02  -5.9133475e+00   2.3623012e+00  -1.4535090e+00
   2.7009076e+01  -2.4566806e+01   2.0000000e+02  -5.7738597e+00   2.3907568e+00  -1.7520220e+00
   2.6989726e+01  -2.4439455e+01   2.0000000e+02  -5.6571836e+00   2.4223804e+00  -2.0450941e+00
   2.6966067e+01  -2.4312712e+01   2.0000000e+02  -5.5604412e+00   2.4523445e+00  -2.3447976e+00
   2.6938135e+01  -2.4186697e+01   2.0000000e+02  -5.4763534e+00   2.4736417e+00  -2.6616953e+00
   2.6905970e+01  -2.4061531e+01   2.0000000e+02  -5.3940334e+00   2.4776541e+00  -3.0029986e+00
   2.6869613e+01  -2.3937333e+01   2.0000000e+02  -5.3004791e+00   2.4551111e+00  -3.3711141e+00
   2.6829112e+01  -2.3814220e+01   2.0000000e+02  -5.1826166e+00   2.3972818e+00  -3.7628806e+00
   2.6784515e+01  -2.3692310e+01   2.0000000e+02  -5.0295796e+00   2.2971437e+00  -4.1698097e+00
   2.6735876e+01  -2.3571717e+01   2.0000000e+02  -4.8347384e+00   2.1502760e+00  -4.5793968e+00
   2.6683251e+01  -2.3452554e+01   2.0000000e+02  -4.5969695e+00   1.9552456e+00  -4.9773196e+00
   2.6626700e+01  -2.3334934e+01   2.0000000e+02  -4.3207702e+00   1.7134202e+00  -5.3500196e+00
   2.6566286e+01  -2.3218967e+01   2.0000000e+02  -4.0151132e+00   1.4282710e+00  -5.6870228e+00
   2.6502074e+01  -2.3104761e+01   2.0000000e+02  -3.6913408e+00   1.1043989e+00  -5.9823394e+00
   2.6434133e+01  -2.2992422e+01   2.0000000e+02  -3.3606825e+00   7.4657545e-01  -6.2345952e+00
   2.6362536e+01  -2.2882056e+01   2.0000000e+02  -3.0320760e+00   3.5906467e-01  -6.4459468e+00
   2.6287357e+01  -2.2773764e+01   2.0000000e+02  -2.7108187e+00  -5.4642053e-02  -6.6202080e+00
   2.6208673e+01  -2.2667647e+01   2.0000000e+02  -2.3983466e+00  -4.9161793e-01  -6.7607856e+00
   2.6126565e+01  -2.2563803e+01   2.0000000e+02  -2.0930042e+00  -9.4900491e-01  -6.8690688e+00
   2.6041115e+01  -2.2462328e+01   2.0000000e+02  -1.7914488e+00  -1.4234251e+00  -6.9436587e+00
   2.5952409e+01  -2.2363316e+01   2.0000000e+02  -1.4902275e+00  -1.9105088e+00  -6.9805180e+00
   2.5860534e+01  -2.2266857e+01   2.0000000e+02  -1.1870679e+00  -2.4047020e+00  -6.9738431e+00
   2.5765580e+01  -2.2173041e+01   2.0000000e+02  -8.8166318e-01  -2.8993228e+00  -6.9172812e+00
   2.5667641e+01  -2.2081952e+01   2.0000000e+02  -5.7589155e-01  -3.3868404e+00  -6.8051312e+00
   2.5566809e+01  -2.1993676e+01   2.0000000e+02  -2.7359051e-01  -3.8591891e+00  -6.6332764e+00
   2.5463183e+01  -2.1908291e+01   2.0000000e+02   1.9859847e-02  -4.3080620e+00  -6.3998140e+00
   2.5356861e+01  -2.1825877e+01   2.0000000e+02   2.9804302e-01  -4.7251228e+00  -6.1054289e+00
   2.5247944e+01  -2.1746508e+01   2.0000000e+02   5.5393369e-01  -5.1022520e+00  -5.7536606e+00
   2.5136533e+01  -2.1670257e+01   2.0000000e+02   7.8028050e-01  -5.4318980e+00  -5.3511178e+00
   2.5022735e+01  -2.1597193e+01   2.0000000e+02   9.6996132e-01  -5.7076689e+00  -4.9076278e+00
   2.4906654e+01  -2.1527383e+01   2.0000000e+02   1.1164152e+00  -5.9251843e+00  -4.4361231e+00
   2.4788398e+01  -2.1460889e+01   2.0000000e+02   1.2141084e+00  -6.0830560e+00  -3.9521621e+00
   2.4668077e+01  -2.1397772e+01   2.0000000e+02   1.2590479e+00  -6.1837881e+00  -3.4729089e+00
   2.4545802e+01  -2.1338090e+01   2.0000000e+02   1.2492281e+00  -6.2343189e+00  -3.0155946e+00
   2.4421685e+01  -2.1281896e+01   2.0000000e+02   1.1849039e+00  -6.2459464e+00  -2.5956614e+00
   2.4295839e+01  -2.1229241e+01   2.0000000e+02   1.0686200e+00  -6.2335323e+00  -2.2249317e+00
   2.4168379e+01  -2.1180172e+01   2.0000000e+02   9.0496934e-01  -6.2140639e+00  -1.9101666e+00
   2.4039421e+01  -2.1134735e+01   2.0000000e+02   7.0014230e-01  -6.2048398e+00  -1.6523355e+00
   2.3909081e+01  -2.1092970e+01   2.0000000e+02   4.6135080e-01  -6.2216447e+00  -1.4467118e+00
   2.3777478e+01  -2.1054914e+01   2.0000000e+02   1.9628236e-01  -6.2772876e+00  -1.2837241e+00
   2.3644730e+01  -2.1020603e+01   2.0000000e+02  -8.7347300e-02  -6.3807360e+00  -1.1502510e+00
   2.3510958e+01  -2.0990066e+01   2.0000000e+02  -3.8210027e-01  -6.5368523e+00  -1.0310373e+00
   2.3376280e+01  -2.0963332e+01   2.0000000e+02  -6.8098410e-01  -6.7466444e+00  -9.0993875e-01
   2.3240818e+01  -2.0940424e+01   2.0000000e+02  -9.7754590e-01  -7.0077250e+00  -7.7087755e-01
   2.3104694e+01  -2.0921363e+01   2.0000000e+02  -1.2659429e+00  -7.3148467e+00  -5.9850376e-01
   2.2968029e+01  -2.0906167e+01   2.0000000e+02  -1.5410285e+00  -7.6603516e+00  -3.7867830e-01
   2.2830946e+01  -2.0894848e+01   2.0000000e+02  -1.7984450e+00  -8.0345125e+00  -9.8900199e-02
   2.2693567e+01  -2.0887418e+01   2.0000000e+02  -2.0346977e+00  -8.4258623e+00   2.5130218e-01
   2.2556015e+01  -2.0883882e+01   2.0000000e+02  -2.2471950e+00  -8.8214947e+00   6.7995389e-01
   2.2418413e+01  -2.0884244e+01   2.0000000e+02  -2.4341904e+00  -9.2074326e+00   1.1922946e+00
   2.2280884e+01  -2.0888504e+01   2.0000000e+02  -2.5946515e+00  -9.5690051e+00   1.7904920e+00
   2.2143550e+01  -2.0896658e+01   2.0000000e+02  -2.7280572e+00  -9.8912431e+00   2.4734399e+00
   2.2006536e+01  -2.0908698e+01   2.0000000e+02  -2.8341726e+00  -1.0159284e+01   3.2365787e+00
   2.1869962e+01  -2.0924614e+01   2.0000000e+02  -2.9128726e+00  -1.0358877e+01   4.0718106e+00
   2.1733952e+01  -2.0944391e+01   2.0000000e+02  -2.9640438e+00  -1.0476993e+01   4.9673673e+00
   2.1598626e+01  -2.0968012e+01   2.0000000e+02  -2.9875911e+00  -1.0502677e+01   5.9079470e+00
   2.1464108e+01  -2.0995455e+01   2.0000000e+02  -2.9835169e+00  -1.0428042e+01   6.8750410e+00
   2.1330516e+01  -2.1026695e+01   2.0000000e+02  -2.9520213e+00  -1.0249292e+01   7.8478199e+00
   2.1197972e+01  -2.1061705e+01   2.0000000e+02  -2.8935548e+00  -9.9675321e+00   8.8043490e+00
   2.1066595e+01  -2.1100453e+01   2.0000000e+02  -2.8088000e+00  -9.5890847e+00   9.7232373e+00
   2.0936503e+01  -2.1142903e+01   2.0000000e+02  -2.6985490e+00  -9.1251698e+00   1.0585323e+01
   2.0807815e+01  -2.1189019e+01   2.0000000e+02  -2.5635133e+00  -8.5909254e+00   1.1375123e+01
   2.0680646e+01  -2.1238757e+01   2.0000000e+02  -2.4041641e+00  -8.0039035e+00   1.2081767e+01
   2.0555112e+01  -2.1292074e+01   2.0000000e+02  -2.2206104e+00  -7.3823950e+00   1.2699248e+01
   2.0431329e+01  -2.1348920e+01   2.0000000e+02  -2.0126459e+00  -6.7438531e+00   1.3226030e+01
   2.0309409e+01  -2.1409245e+01   2.0000000e+02  -1.7798890e+00  -6.1036745e+00   1.3664238e+01
   2.0189464e+01  -2.1472994e+01   2.0000000e+02  -1.5220489e+00  -5.4745383e+00   1.4018572e+01
   2.0071604e+01  -2.1540108e+01   2.0000000e+02  -1.2391878e+00  -4.8662248e+00   1.4295287e+01
   1.9955939e+01  -2.1610529e+01   2.0000000e+02  -9.3190393e-01  -4.2858474e+00   1.4501353e+01
   1.9842576e+01  -2.1684190e+01   2.0000000e+02  -6.0144236e-01  -3.7382987e+00   1.4643848e+01
   1.9731622e+01  -2.1761026e+01   2.0000000e+02  -2.4961336e-01  -3.2267826e+00   1.4729589e+01
   1.9623179e+01  -2.1840966e+01   2.0000000e+02   1.2131929e-01  -2.7532754e+00   1.4764890e+01
   1.9517350e+01  -2.1923938e+01   2.0000000e+02   5.0881204e-01  -2.3189224e+00   1.4755412e+01
   1.9414236e+01  -2.2009866e+01   2.0000000e+02   9.1015156e-01  -1.9242919e+00   1.4706037e+01
   1.9313935e+01  -2.2098672e+01   2.0000000e+02   1.3225014e+00  -1.5695479e+00   1.4620780e+01
   1.9216543e+01  -2.2190274e+01   2.0000000e+02   1.7428511e+00  -1.2545632e+00   1.4502771e+01
   1.9122155e+01  -2.2284588e+01   2.0000000e+02   2.1679386e+00  -9.7896853e-01   1.4354323e+01
   1.9030862e+01  -2.2381528e+01   2.0000000e+02   2.5941718e+00  -7.4213303e-01   1.4177081e+01
   1.8942755e+01  -2.2481005e+01   2.0000000e+02   3.0175917e+00  -5.4311241e-01   1.3972228e+01
   1.8857919e+01  -2.2582927e+01   2.0000000e+02   3.4338976e+00  -3.8054891e-01   1.3740664e+01
   1.8776441e+01  -2.2687201e+01   2.0000000e+02   3.8385245e+00  -2.5262796e-01   1.3483182e+01
   1.8698403e+01  -2.2793729e+01   2.0000000e+02   4.2267197e+00  -1.5706983e-01   1.3200581e+01
   1.8623884e+01  -2.2902414e+01   2.0000000e+02   4.5936787e+00  -9.1243370e-02   1.2893773e+01
   1.8552961e+01  -2.3013155e+01   2.0000000e+02   4.9346705e+00  -5.2360660e-02   1.2563936e+01
   1.8485708e+01  -2.3125849e+01   2.0000000e+02   5.2452490e+00  -3.7717659e-02   1.2212667e+01
   1.8422197e+01  -2.3240390e+01   2.0000000e+02   5.5215292e+00  -4.4922369e-02   1.1842150e+01
   1.8362495e+01  -2.3356673e+01   2.0000000e+02   5.7605311e+00  -7.2044713e-02   1.1455220e+01
   1.8306669e+01  -2.3474588e+01   2.0000000e+02   5.9605044e+00  -1.1765599e-01   1.1055323e+01
   1.8254781e+01  -2.3594025e+01   2.0000000e+02   6.1211834e+00  -1.8073631e-01   1.0646238e+01
   1.8206889e+01  -2.3714872e+01   2.0000000e+02   6.2438363e+00  -2.6049302e-01   1.0231651e+01
   1.8163049e+01  -2.3837014e+01   2.0000000e+02   6.3310589e+00  -3.5614791e-01   9.8146159e+00
   1.8123314e+01  -2.3960337e+01   2.0000000e+02   6.3862881e+00  -4.6675423e-01   9.3970270e+00
   1.8087733e+01  -2.4084724e+01   2.0000000e+02   6.4130835e+00  -5.9107865e-01   8.9793021e+00
   1.8056352e+01  -2.4210057e+01   2.0000000e+02   6.4143293e+00  -7.2761252e-01   8.5603464e+00
   1.8029211e+01  -2.4336217e+01   2.0000000e+02   6.3915076e+00  -8.7466841e-01   8.1378903e+00
   1.8006351e+01  -2.4463082e+01   2.0000000e+02   6.3442504e+00  -1.0305829e+00   7.7091655e+00
   1.7987804e+01  -2.4590533e+01   2.0000000e+02   6.2702505e+00  -1.1938724e+00   7.2717597e+00
   1.7973603e+01  -2.4718446e+01   2.0000000e+02   6.1656432e+00  -1.3633924e+00   6.8245217e+00
   1.7963774e+01  -2.4846698e+01   2.0000000e+02   6.0257130e+00  -1.5383419e+00   6.3682204e+00
   1.7958339e+01  -2.4975166e+01   2.0000000e+02   5.8458111e+00  -1.7181832e+00   5.9058741e+00
   1.7957318e+01  -2.5103725e+01   2.0000000e+02   5.6222611e+00  -1.9024626e+00   5.4426894e+00
   1.7960726e+01  -2.5232251e+01   2.0000000e+02   5.3530751e+00  -2.0905709e+00   4.9856600e+00
   1.7968574e+01  -2.5360618e+01   2.0000000e+02   5.0384315e+00  -2.2815415e+00   4.5429823e+00
   1.7980868e+01  -2.5488700e+01   2.0000000e+02   4.6809024e+00  -2.4739335e+00   4.1233686e+00
   1.7997609e+01  -2.5616372e+01   2.0000000e+02   4.2854953e+00  -2.6658456e+00   3.7353424e+00
   1.8018797e+01  -2.5743509e+01   2.0000000e+02   3.8595594e+00  -2.8550789e+00   3.3865217e+00
   1.8044425e+01  -2.5869984e+01   2.0000000e+02   3.4125386e+00  -3.0393456e+00   3.0829000e+00
   1.8074481e+01  -2.5995673e+01   2.0000000e+02   2.9555080e+00  -3.2165646e+00   2.8281092e+00
   1.8108951e+01  -2.6120450e+01   2.0000000e+02   2.5004968e+00  -3.3851351e+00   2.6227882e+00
   1.8147814e+01  -2.6244192e+01   2.0000000e+02   2.0595278e+00  -3.5440989e+00   2.4641576e+00
   1.8191046e+01  -2.6366774e+01   2.0000000e+02   1.6435270e+00  -3.6932424e+00   2.3459175e+00
   1.8238617e+01  -2.6488074e+01   2.0000000e+02   1.2611749e+00  -3.8330458e+00   2.2585469e+00
   1.8290494e+01  -2.6607968e+01   2.0000000e+02   9.1793992e-01  -3.9645495e+00   2.1899866e+00
   1.8346639e+01  -2.6726337e+01   2.0000000e+02   6.1539033e-01  -4.0890832e+00   2.1266482e+00
   1.8407007e+01  -2.6843059e+01   2.0000000e+02   3.5095920e-01  -4.2079234e+00   2.0546109e+00
   1.8471551e+01  -2.6958016e+01   2.0000000e+02   1.1811358e-01  -4.3219169e+00   1.9608658e+00
   1.8540219e+01  -2.7071091e+01   2.0000000e+02  -9.3029634e-02  -4.4310852e+00   1.8345085e+00
   1.8612953e+01  -2.7182167e+01   2.0000000e+02  -2.9476026e-01  -4.5343213e+00   1.6677606e+00
   1.8689691e+01  -2.7291131e+01   2.0000000e+02  -5.0061314e-01  -4.6292519e+00   1.4567401e+00
   1.8770366e+01  -2.7397869e+01   2.0000000e+02  -7.2408633e-01  -4.7123358e+00   1.2019320e+00
   1.8854906e+01  -2.7502272e+01   2.0000000e+02  -9.7737320e-01  -4.7792160e+00   9.0829966e-01
   1.8943236e+01  -2.7604231e+01   2.0000000e+02  -1.2701933e+00  -4.8253557e+00   5.8498812e-01
   1.9035274e+01  -2.7703640e+01   2.0000000e+02  -1.6088148e+00  -4.8468207e+00   2.4459381e-01
   1.9130935e+01  -2.7800395e+01   2.0000000e+02  -1.9953846e+00  -4.8411408e+00  -9.8050546e-02
   1.9230129e+01  -2.7894394e+01   2.0000000e+02  -2.4276432e+00  -4.8080089e+00  -4.2748618e-01
   1.9332762e+01  -2.7985538e+01   2.0000000e+02  -2.8991264e+00  -4.7496554e+00  -7.2951057e-01
   1.9438735e+01  -2.8073732e+01   2.0000000e+02  -3.3998706e+00  -4.6707362e+00  -9.9306150e-01
   1.9547944e+01  -2.8158881e+01   2.0000000e+02  -3.9175598e+00  -4.5776968e+00  -1.2117941e+00
   1.9660282e+01  -2.8240897e+01   2.0000000e+02  -4.4389986e+00  -4.4776247e+00  -1.3850132e+00
   1.9775638e+01  -2.8319690e+01   2.0000000e+02  -4.9515863e+00  -4.3768573e+00  -1.5177286e+00
   1.9893896e+01  -2.8395178e+01   2.0000000e+02  -5.4446061e+00  -4.2795401e+00  -1.6197208e+00
   2.0014936e+01  -2.8467279e+01   2.0000000e+02  -5.9099894e+00  -4.1865816e+00  -1.7038327e+00
   2.0138635e+01  -2.8535917e+01   2.0000000e+02  -6.3424923e+00  -4.0951706e+00  -1.7837722e+00
   2.0264866e+01  -2.8601016e+01   2.0000000e+02  -6.7392409e+00  -3.9990476e+00  -1.8719686e+00
   2.0393498e+01  -2.8662508e+01   2.0000000e+02  -7.0988933e+00  -3.8893820e+00  -1.9778518e+00
   2.0524398e+01  -2.8720326e+01   2.0000000e+02  -7.4206331e+00  -3.7560654e+00  -2.1069742e+00
   2.0657429e+01  -2.8774407e+01   2.0000000e+02  -7.7033185e+00  -3.5890064e+00  -2.2609076e+00
   2.0792450e+01  -2.8824692e+01   2.0000000e+02  -7.9449645e+00  -3.3791209e+00  -2.4378060e+00
   2.0929318e+01  -2.8871127e+01   2.0000000e+02  -8.1426339e+00  -3.1187816e+00  -2.6332648e+00
   2.1067889e+01  -2.8913662e+01   2.0000000e+02  -8.2926739e+00  -2.8016984e+00  -2.8410720e+00
   2.1208013e+01  -2.8952250e+01   2.0000000e+02  -8.3911758e+00  -2.4224240e+00  -3.0534810e+00
   2.1349541e+01  -2.8986849e+01   2.0000000e+02  -8.4345250e+00  -1.9758055e+00  -3.2608832e+00
   2.1492320e+01  -2.9017421e+01   2.0000000e+02  -8.4199014e+00  -1.4568662e+00  -3.4509290e+00
   2.1636196e+01  -2.9043932e+01   2.0000000e+02  -8.3456814e+00  -8.6143213e-01  -3.6075011e+00
   2.1781013e+01  -2.9066355e+01   2.0000000e+02  -8.2117366e+00  -1.8767010e-01  -3.7100418e+00
   2.1926614e+01  -2.9084663e+01   2.0000000e+02  -8.0196518e+00   5.6170108e-01  -3.7339345e+00
   2.2072840e+01  -2.9098837e+01   2.0000000e+02  -7.7729510e+00   1.3770418e+00  -3.6521857e+00
   2.2219533e+01  -2.9108862e+01   2.0000000e+02  -7.4773057e+00   2.2401159e+00  -3.4386167e+00
   2.2366531e+01  -2.9114726e+01   2.0000000e+02  -7.1407146e+00   3.1237959e+00  -3.0719972e+00
   2.2513676e+01  -2.9116423e+01   2.0000000e+02  -6.7734884e+00   3.9937130e+00  -2.5402012e+00
   2.2660805e+01  -2.9113951e+01   2.0000000e+02  -6.3879510e+00   4.8116050e+00  -1.8434043e+00
   2.2807759e+01  -2.9107313e+01   2.0000000e+02  -5.9977047e+00   5.5398895e+00  -9.9530887e-01
   2.2954377e+01  -2.9096516e+01   2.0000000e+02  -5.6165820e+00   6.1462501e+00  -2.2157952e-02
   2.3100500e+01  -2.9081572e+01   2.0000000e+02  -5.2573972e+00   6.6073363e+00   1.0402966e+00
   2.3245967e+01  -2.9062498e+01   2.0000000e+02  -4.9307890e+00   6.9108163e+00   2.1509881e+00
   2.3390621e+01  -2.9039314e+01   2.0000000e+02  -4.6443382e+00   7.0556857e+00   3.2680578e+00
   2.3534304e+01  -2.9012045e+01   2.0000000e+02  -4.4021549e+00   7.0510474e+00   4.3527497e+00
   2.3676862e+01  -2.8980722e+01   2.0000000e+02  -4.2049270e+00   6.9139454e+00   5.3723551e+00
   2.3818141e+01  -2.8945379e+01   2.0000000e+02  -4.0504347e+00   6.6667658e+00   6.3019261e+00
   2.3957988e+01  -2.8906054e+01   2.0000000e+02  -3.9343586e+00   6.3345987e+00   7.1249524e+00
   2.4700234e+01  -2.8764147e+01   2.0000000e+02  -3.1567142e+00   3.6721788e+00   9.8036293e+00
   2.4828699e+01  -2.8701863e+01   2.0000000e+02  -3.1667668e+00   3.2639456e+00   9.9819290e+00
   2.4954798e+01  -2.8636081e+01   2.0000000e+02  -3.1924572e+00   2.8855577e+00   1.0096975e+01
   2.5078409e+01  -2.8566866e+01   2.0000000e+02  -3.2332420e+00   2.5388822e+00   1.0159457e+01
   2.5199411e+01  -2.8494290e+01   2.0000000e+02  -3.2888963e+00   2.2238766e+00   1.0178355e+01
   2.5317689e+01  -2.8418426e+01   2.0000000e+02  -3.3593287e+00   1.9393295e+00   1.0160646e+01
   2.5433129e+01  -2.8339351e+01   2.0000000e+02  -3.4443799e+00   1.6835742e+00   1.0111189e+01
   2.5545622e+01  -2.8257145e+01   2.0000000e+02  -3.5435927e+00   1.4551248e+00   1.0032827e+01
   2.5655063e+01  -2.8171890e+01   2.0000000e+02  -3.6559889e+00   1.2532405e+00   9.9267512e+00
   2.5761351e+01  -2.8083672e+01   2.0000000e+02  -3.7799194e+00   1.0782943e+00   9.7931752e+00
   2.5864388e+01  -2.7992580e+01   2.0000000e+02  -3.9131274e+00   9.3185056e-01   9.6322092e+00
   2.5964080e+01  -2.7898703e+01   2.0000000e+02  -4.0530884e+00   8.1636850e-01   9.4447291e+00
   2.6060338e+01  -2.7802136e+01   2.0000000e+02  -4.1975613e+00   7.3455042e-01   9.2329743e+00
   2.6153076e+01  -2.7702974e+01   2.0000000e+02  -4.3452892e+00   6.8853740e-01   9.0006242e+00
   2.6242214e+01  -2.7601315e+01   2.0000000e+02  -4.4965450e+00   6.7910201e-01   8.7522950e+00
   2.6327675e+01  -2.7497260e+01   2.0000000e+02  -4.6533619e+00   7.0510738e-01   8.4925442e+00
   2.6409385e+01  -2.7390910e+01   2.0000000e+02  -4.8192710e+00   7.6334493e-01   8.2246349e+00
   2.6487277e+01  -2.7282370e+01   2.0000000e+02  -4.9984703e+00   8.4876357e-01   7.9494318e+00
   2.6561286e+01  -2.7171746e+01   2.0000000e+02  -5.1946122e+00   9.5508365e-01   7.6647626e+00
   2.6631354e+01  -2.7059144e+01   2.0000000e+02  -5.4094129e+00   1.0755784e+00   7.3655199e+00
   2.6697424e+01  -2.6944675e+01   2.0000000e+02  -5.6414845e+00   1.2038652e+00   7.0445886e+00
   2.6759446e+01  -2.6828448e+01   2.0000000e+02  -5.8857687e+00   1.3345149e+00   6.6943753e+00
   2.6817373e+01  -2.6710576e+01   2.0000000e+02  -6.1337632e+00   1.4633450e+00   6.3086061e+00
   2.6871163e+01  -2.6591172e+01   2.0000000e+02  -6.3745652e+00   1.5873961e+00   5.8838362e+00
   2.6920779e+01  -2.6470349e+01   2.0000000e+02  -6.5964356e+00   1.7046661e+00   5.4202922e+00
   2.6966186e+01  -2.6348224e+01   2.0000000e+02  -6.7884630e+00   1.8137577e+00   4.9218704e+00
   2.7007356e+01  -2.6224910e+01   2.0000000e+02  -6.9419214e+00   1.9136042e+00   4.3953387e+00
   2.7044263e+01  -2.6100527e+01   2.0000000e+02  -7.0509994e+00   2.0033417e+00   3.8491938e+00
   2.7076887e+01  -2.5975189e+01   2.0000000e+02  -7.1129023e+00   2.0823635e+00   3.2924152e+00
   2.7105211e+01  -2.5849016e+01   2.0000000e+02  -7.1274264e+00   2.1504498e+00   2.7336680e+00
   2.7129222e+01  -2.5722126e+01   2.0000000e+02  -7.0963450e+00   2.2079145e+00   2.1809098e+00
   2.7148913e+01  -2.5594636e+01   2.0000000e+02  -7.0228841e+00   2.2556740e+00   1.6414658e+00
   2.7164279e+01  -2.5466666e+01   2.0000000e+02  -6.9115074e+00   2.2952208e+00   1.1222717e+00
   2.7175320e+01  -2.5338334e+01   2.0000000e+02  -6.7680047e+00   2.3285201e+00   6.2992551e-01
   2.7182040e+01  -2.5209758e+01   2.0000000e+02  -6.5997069e+00   2.3578543e+00   1.7036788e-01
   2.7184445e+01  -2.5081057e+01   2.0000000e+02  -6.4155382e+00   2.3856331e+00  -2.5187507e-01
   2.7182549e+01  -2.4952349e+01   2.0000000e+02  -6.2256527e+00   2.4141560e+00  -6.3468114e-01
   2.7176365e+01  -2.4823752e+01   2.0000000e+02  -6.0405879e+00   2.4452782e+00  -9.7923192e-01
   2.7165913e+01  -2.4695383e+01   2.0000000e+02  -5.8700318e+00   2.4799811e+00  -1.2904736e+00
   2.7151215e+01  -2.4567359e+01   2.0000000e+02  -5.7214540e+00   2.5178679e+00  -1.5769695e+00
   2.7132298e+01  -2.4439796e+01   2.0000000e+02  -5.5988593e+00   2.5566999e+00  -1.8500849e+00
   2.7109191e+01  -2.4312809e+01   2.0000000e+02  -5.5019073e+00   2.5921144e+00  -2.1226001e+00
   2.7081927e+01  -2.4186513e+01   2.0000000e+02  -5.4255773e+00   2.6176756e+00  -2.4069063e+00
   2.7050544e+01  -2.4061021e+01   2.0000000e+02  -5.3605221e+00   2.6253455e+00  -2.7130346e+00
   2.7015080e+01  -2.3936446e+01   2.0000000e+02  -5.2942005e+00   2.6063481e+00  -3.0468414e+00
   2.6975579e+01  -2.3812898e+01   2.0000000e+02  -5.2127307e+00   2.5523182e+00  -3.4087222e+00
   2.6932088e+01  -2.3690489e+01   2.0000000e+02  -5.1032428e+00   2.4564782e+00  -3.7932559e+00
   2.6884655e+01  -2.3569327e+01   2.0000000e+02  -4.9562491e+00   2.3145776e+00  -4.1900428e+00
   2.6833334e+01  -2.3449519e+01   2.0000000e+02  -4.7674606e+00   2.1253655e+00  -4.5856195e+00
   2.6778179e+01  -2.3331172e+01   2.0000000e+02  -4.5384983e+00   1.8904615e+00  -4.9661117e+00
   2.6719250e+01  -2.3214390e+01   2.0000000e+02  -4.2762493e+00   1.6136885e+00  -5.3198740e+00
   2.6656606e+01  -2.3099276e+01   2.0000000e+02  -3.9910054e+00   1.3000489e+00  -5.6394233e+00
   2.6590313e+01  -2.2985930e+01   2.0000000e+02  -3.6939418e+00   9.5465478e-01  -5.9220812e+00
   2.6520437e+01  -2.2874454e+01   2.0000000e+02  -3.3946278e+00   5.8188640e-01  -6.1692674e+00
   2.6447046e+01  -2.2764942e+01   2.0000000e+02  -3.0992446e+00   1.8496208e-01  -6.3847187e+00
   2.6370214e+01  -2.2657493e+01   2.0000000e+02  -2.8099483e+00  -2.3392832e-01  -6.5722350e+00
   2.6290014e+01  -2.2552199e+01   2.0000000e+02  -2.5253165e+00  -6.7315027e-01  -6.7337146e+00
   2.6206523e+01  -2.2449151e+01   2.0000000e+02  -2.2416902e+00  -1.1308702e+00  -6.8679456e+00
   2.6119820e+01  -2.2348440e+01   2.0000000e+02  -1.9548476e+00  -1.6043559e+00  -6.9704484e+00
   2.6029986e+01  -2.2250152e+01   2.0000000e+02  -1.6615352e+00  -2.0895351e+00  -7.0342442e+00
   2.5937105e+01  -2.2154373e+01   2.0000000e+02  -1.3605015e+00  -2.5808648e+00  -7.0511831e+00
   2.5841262e+01  -2.2061186e+01   2.0000000e+02  -1.0528849e+00  -3.0715423e+00  -7.0133892e+00
   2.5742546e+01  -2.1970670e+01   2.0000000e+02  -7.4206890e-01  -3.5538761e+00  -6.9144518e+00
   2.5641045e+01  -2.1882904e+01   2.0000000e+02  -4.3318797e-01  -4.0196767e+00  -6.7501837e+00
   2.5536852e+01  -2.1797963e+01   2.0000000e+02  -1.3256946e-01  -4.4605550e+00  -6.5190052e+00
   2.5430060e+01  -2.1715921e+01   2.0000000e+02   1.5277495e-01  -4.8681147e+00  -6.2220878e+00
   2.5320763e+01  -2.1636847e+01   2.0000000e+02   4.1550881e-01  -5.2341299e+00  -5.8634624e+00
   2.5209060e+01  -2.1560809e+01   2.0000000e+02   6.4822757e-01  -5.5508193e+00  -5.4501997e+00
   2.5095048e+01  -2.1487873e+01   2.0000000e+02   8.4373845e-01  -5.8114049e+00  -4.9925701e+00
   2.4978827e+01  -2.1418100e+01   2.0000000e+02   9.9539584e-01  -6.0109434e+00  -4.5040764e+00
   2.4860499e+01  -2.1351551e+01   2.0000000e+02   1.0975637e+00  -6.1473542e+00  -4.0010984e+00
   2.4740167e+01  -2.1288282e+01   2.0000000e+02   1.1461446e+00  -6.2224345e+00  -3.5019713e+00
   2.4617936e+01  -2.1228348e+01   2.0000000e+02   1.1390701e+00  -6.2425398e+00  -3.0255044e+00
   2.4493910e+01  -2.1171798e+01   2.0000000e+02   1.0766220e+00  -6.2186781e+00  -2.5890627e+00
   2.4368197e+01  -2.1118682e+01   2.0000000e+02   9.6149576e-01  -6.1658597e+00  -2.2066082e+00
   2.4240904e+01  -2.1069044e+01   2.0000000e+02   7.9855486e-01  -6.1017454e+00  -1.8870134e+00
   2.4112140e+01  -2.1022927e+01   2.0000000e+02   5.9434521e-01  -6.0448287e+00  -1.6330936e+00
   2.3982015e+01  -2.0980369e+01   2.0000000e+02   3.5645915e-01  -6.0125142e+00  -1.4414801e+00
   2.3850640e+01  -2.0941408e+01   2.0000000e+02   9.2909949e-02  -6.0194919e+00  -1.3033244e+00
   2.3718127e+01  -2.0906075e+01   2.0000000e+02  -1.8840257e-01  -6.0766593e+00  -1.2055566e+00
   2.3584587e+01  -2.0874402e+01   2.0000000e+02  -4.8003366e-01  -6.1907132e+00  -1.1323636e+00
   2.3450134e+01  -2.0846414e+01   2.0000000e+02  -7.7519070e-01  -6.3642447e+00  -1.0665601e+00
   2.3314881e+01  -2.0822136e+01   2.0000000e+02  -1.0678018e+00  -6.5961824e+00  -9.9067041e-01
   2.3178943e+01  -2.0801588e+01   2.0000000e+02  -1.3525440e+00  -6.8822914e+00  -8.8771464e-01
   2.3042434e+01  -2.0784787e+01   2.0000000e+02  -1.6248641e+00  -7.2156407e+00  -7.4177780e-01
   2.2905469e+01  -2.0771748e+01   2.0000000e+02  -1.8810032e+00  -7.5869655e+00  -5.3849063e-01
   2.2768162e+01  -2.0762482e+01   2.0000000e+02  -2.1180332e+00  -7.9849870e+00  -2.6549994e-01
   2.2630631e+01  -2.0756996e+01   2.0000000e+02  -2.3338459e+00  -8.3967387e+00   8.7052530e-02
   2.2492990e+01  -2.0755296e+01   2.0000000e+02  -2.5270981e+00  -8.8079985e+00   5.2614157e-01
   2.2355354e+01  -2.0757382e+01   2.0000000e+02  -2.6970671e+00  -9.2037187e+00   1.0555314e+00
   2.2217840e+01  -2.0763253e+01   2.0000000e+02  -2.8434342e+00  -9.5684909e+00   1.6756092e+00
   2.2080563e+01  -2.0772904e+01   2.0000000e+02  -2.9660587e+00  -9.8869799e+00   2.3833187e+00
   2.1943639e+01  -2.0786326e+01   2.0000000e+02  -3.0647722e+00  -1.0144328e+01   3.1721117e+00
   2.1807183e+01  -2.0803510e+01   2.0000000e+02  -3.1392602e+00  -1.0326635e+01   4.0319337e+00
   2.1671309e+01  -2.0824438e+01   2.0000000e+02  -3.1890732e+00  -1.0421578e+01   4.9491917e+00
   2.1536133e+01  -2.0849095e+01   2.0000000e+02  -3.2137135e+00  -1.0419271e+01   5.9069302e+00
   2.1401768e+01  -2.0877460e+01   2.0000000e+02  -3.2128105e+00  -1.0313265e+01   6.8853118e+00
   2.1268327e+01  -2.0909507e+01   2.0000000e+02  -3.1862696e+00  -1.0101547e+01   7.8625379e+00
   2.1135925e+01  -2.0945211e+01   2.0000000e+02  -3.1343349e+00  -9.7872421e+00   8.8162503e+00
   2.1004672e+01  -2.0984540e+01   2.0000000e+02  -3.0575600e+00  -9.3787647e+00   9.7252442e+00
   2.0874681e+01  -2.1027462e+01   2.0000000e+02  -2.9566316e+00  -8.8892941e+00   1.0571140e+01
   2.0746062e+01  -2.1073939e+01   2.0000000e+02  -2.8321505e+00  -8.3355583e+00   1.1339771e+01
   2.0618925e+01  -2.1123933e+01   2.0000000e+02  -2.6843965e+00  -7.7361825e+00   1.2021945e+01
   2.0493378e+01  -2.1177402e+01   2.0000000e+02  -2.5132138e+00  -7.1098864e+00   1.2613497e+01
   2.0369531e+01  -2.1234298e+01   2.0000000e+02  -2.3180551e+00  -6.4739129e+00   1.3114670e+01
   2.0247488e+01  -2.1294575e+01   2.0000000e+02  -2.0981633e+00  -5.8428568e+00   1.3529138e+01
   2.0127355e+01  -2.1358180e+01   2.0000000e+02  -1.8529174e+00  -5.2281562e+00   1.3862773e+01
   2.0009238e+01  -2.1425060e+01   2.0000000e+02  -1.5821537e+00  -4.6380751e+00   1.4122597e+01
   1.9893237e+01  -2.1495158e+01   2.0000000e+02  -1.2864326e+00  -4.0780753e+00   1.4315963e+01
   1.9779456e+01  -2.1568413e+01   2.0000000e+02  -9.6715029e-01  -3.5514677e+00   1.4450036e+01
   1.9667993e+01  -2.1644763e+01   2.0000000e+02  -6.2645717e-01  -3.0599957e+00   1.4531556e+01
   1.9558947e+01  -2.1724142e+01   2.0000000e+02  -2.6707048e-01  -2.6044014e+00   1.4566728e+01
   1.9452415e+01  -2.1806483e+01   2.0000000e+02   1.0799937e-01  -2.1847966e+00   1.4561165e+01
   1.9348492e+01  -2.1891715e+01   2.0000000e+02   4.9567556e-01  -1.8009171e+00   1.4519812e+01
   1.9247271e+01  -2.1979765e+01   2.0000000e+02   8.9297105e-01  -1.4522751e+00   1.4446858e+01
   1.9148843e+01  -2.2070556e+01   2.0000000e+02   1.2970180e+00  -1.1382556e+00   1.4345650e+01
   1.9053298e+01  -2.2164012e+01   2.0000000e+02   1.7050321e+00  -8.5816590e-01   1.4218690e+01
   1.8960724e+01  -2.2260050e+01   2.0000000e+02   2.1141845e+00  -6.1123921e-01   1.4067696e+01
   1.8871205e+01  -2.2358588e+01   2.0000000e+02   2.5215406e+00  -3.9657731e-01   1.3893736e+01
   1.8784825e+01  -2.2459542e+01   2.0000000e+02   2.9239836e+00  -2.1307376e-01   1.3697385e+01
   1.8701666e+01  -2.2562822e+01   2.0000000e+02   3.3181656e+00  -5.9321437e-02   1.3478862e+01
   1.8621805e+01  -2.2668340e+01   2.0000000e+02   3.7005144e+00   6.6429894e-02   1.3238130e+01
   1.8545320e+01  -2.2776004e+01   2.0000000e+02   4.0671962e+00   1.6620802e-01   1.2975027e+01
   1.8472284e+01  -2.2885720e+01   2.0000000e+02   4.4141354e+00   2.4218109e-01   1.2689423e+01
   1.8402770e+01  -2.2997391e+01   2.0000000e+02   4.7370952e+00   2.9643550e-01   1.2381467e+01
   1.8336845e+01  -2.3110921e+01   2.0000000e+02   5.0318790e+00   3.3076650e-01   1.2051863e+01
   1.8274577e+01  -2.3226210e+01   2.0000000e+02   5.2946369e+00   3.4650944e-01   1.1702153e+01
   1.8216029e+01  -2.3343157e+01   2.0000000e+02   5.5222873e+00   3.4450424e-01   1.1334856e+01
   1.8161262e+01  -2.3461657e+01   2.0000000e+02   5.7129475e+00   3.2517711e-01   1.0953418e+01
   1.8110335e+01  -2.3581608e+01   2.0000000e+02   5.8662847e+00   2.8872372e-01   1.0561866e+01
   1.8063301e+01  -2.3702902e+01   2.0000000e+02   5.9836001e+00   2.3538209e-01   1.0164282e+01
   1.8020214e+01  -2.3825432e+01   2.0000000e+02   6.0676532e+00   1.6563050e-01   9.7641134e+00
   1.7981122e+01  -2.3949089e+01   2.0000000e+02   6.1221204e+00   8.0357382e-02   9.3635493e+00
   1.7946072e+01  -2.4073763e+01   2.0000000e+02   6.1508272e+00  -1.9139179e-02   8.9631210e+00
   1.7915107e+01  -2.4199342e+01   2.0000000e+02   6.1568594e+00  -1.3125398e-01   8.5616620e+00
   1.7888265e+01  -2.4325714e+01   2.0000000e+02   6.1417711e+00  -2.5428752e-01   8.1566866e+00
   1.7865583e+01  -2.4452765e+01   2.0000000e+02   6.1050861e+00  -3.8671100e-01   7.7451583e+00
   1.7847095e+01  -2.4580380e+01   2.0000000e+02   6.0442275e+00  -5.2737821e-01   7.3244642e+00
   1.7832828e+01  -2.4708444e+01   2.0000000e+02   5.9549202e+00  -6.7562224e-01   6.8933800e+00
   1.7822810e+01  -2.4836842e+01   2.0000000e+02   5.8320062e+00  -8.3126033e-01   6.4527901e+00
   1.7817062e+01  -2.4965456e+01   2.0000000e+02   5.6704398e+00  -9.9437924e-01   6.0060045e+00
   1.7815603e+01  -2.5094168e+01   2.0000000e+02   5.4662698e+00  -1.1650880e+00   5.5586079e+00
   1.7818447e+01  -2.5222862e+01   2.0000000e+02   5.2173883e+00  -1.3431998e+00   5.1179484e+00
   1.7825607e+01  -2.5351418e+01   2.0000000e+02   4.9239983e+00  -1.5279866e+00   4.6924483e+00
   1.7837088e+01  -2.5479719e+01   2.0000000e+02   4.5887565e+00  -1.7180146e+00   4.2908203e+00
   1.7852895e+01  -2.5607646e+01   2.0000000e+02   4.2167452e+00  -1.9111945e+00   3.9213544e+00
   1.7873026e+01  -2.5735080e+01   2.0000000e+02   3.8152780e+00  -2.1049209e+00   3.5912401e+00
   1.7897477e+01  -2.5861902e+01   2.0000000e+02   3.3936058e+00  -2.2963827e+00   3.3059247e+00
   1.7926240e+01  -2.5987996e+01   2.0000000e+02   2.9624609e+00  -2.4828858e+00   3.0685021e+00
   1.7959301e+01  -2.6113241e+01   2.0000000e+02   2.5334445e+00  -2.6621475e+00   2.8792030e+00
   1.7996643e+01  -2.6237521e+01   2.0000000e+02   2.1181369e+00  -2.8325415e+00   2.7350273e+00
   1.8038245e+01  -2.6360719e+01   2.0000000e+02   1.7270952e+00  -2.9932066e+00   2.6297009e+00
   1.8084083e+01  -2.6482717e+01   2.0000000e+02   1.3687871e+00  -3.1440564e+00   2.5539808e+00
   1.8134125e+01  -2.6603401e+01   2.0000000e+02   1.0486378e+00  -3.2856588e+00   2.4963396e+00
   1.8188338e+01  -2.6722654e+01   2.0000000e+02   7.6838669e-01  -3.4190892e+00   2.4439170e+00
   1.8246685e+01  -2.6840364e+01   2.0000000e+02   5.2579931e-01  -3.5456557e+00   2.3836423e+00
   1.8309121e+01  -2.6956416e+01   2.0000000e+02   3.1484357e-01  -3.6665707e+00   2.3033703e+00
   1.8375601e+01  -2.7070700e+01   2.0000000e+02   1.2621510e-01  -3.7826210e+00   2.1928934e+00
   1.8446073e+01  -2.7183105e+01   2.0000000e+02  -5.1794799e-02  -3.8938001e+00   2.0447912e+00
   1.8520480e+01  -2.7293523e+01   2.0000000e+02  -2.3225499e-01  -3.9990434e+00   1.8550432e+00
   1.8598764e+01  -2.7401844e+01   2.0000000e+02  -4.2845700e-01  -4.0961355e+00   1.6234031e+00
   1.8680860e+01  -2.7507965e+01   2.0000000e+02  -6.5277489e-01  -4.1817734e+00   1.3535433e+00
   1.8766698e+01  -2.7611781e+01   2.0000000e+02  -9.1559600e-01  -4.2519436e+00   1.0529361e+00
   1.8856206e+01  -2.7713190e+01   2.0000000e+02  -1.2243952e+00  -4.3025168e+00   7.3242325e-01
   1.8949307e+01  -2.7812092e+01   2.0000000e+02  -1.5829900e+00  -4.3299999e+00   4.0544790e-01
   1.9045919e+01  -2.7908389e+01   2.0000000e+02  -1.9910790e+00  -4.3323317e+00   8.6894588e-02
   1.9145956e+01  -2.8001987e+01   2.0000000e+02  -2.4441631e+00  -4.3095345e+00  -2.0842449e-01
   1.9249328e+01  -2.8092791e+01   2.0000000e+02  -2.9339003e+00  -4.2640631e+00  -4.6748840e-01
   1.9355941e+01  -2.8180711e+01   2.0000000e+02  -3.4489563e+00  -4.2006679e+00  -6.8076429e-01
   1.9465698e+01  -2.8265659e+01   2.0000000e+02  -3.9762380e+00  -4.1257803e+00  -8.4357033e-01
   1.9578496e+01  -2.8347550e+01   2.0000000e+02  -4.5023537e+00  -4.0464387e+00  -9.5680515e-01
   1.9694230e+01  -2.8426301e+01   2.0000000e+02  -5.0150689e+00  -3.9689748e+00  -1.0268644e+00
   1.9812791e+01  -2.8501834e+01   2.0000000e+02  -5.5044691e+00  -3.8976909e+00  -1.0646589e+00
   1.9934064e+01  -2.8574071e+01   2.0000000e+02  -5.9635889e+00  -3.8338753e+00  -1.0839384e+00
   2.0057933e+01  -2.8642939e+01   2.0000000e+02  -6.3884664e+00  -3.7753481e+00  -1.0992279e+00
   2.0184280e+01  -2.8708368e+01   2.0000000e+02  -6.7775904e+00  -3.7166691e+00  -1.1238273e+00
   2.0312979e+01  -2.8770292e+01   2.0000000e+02  -7.1309649e+00  -3.6499100e+00  -1.1682417e+00
   2.0443904e+01  -2.8828647e+01   2.0000000e+02  -7.4490818e+00  -3.5657919e+00  -1.2393665e+00
   2.0576927e+01  -2.8883373e+01   2.0000000e+02  -7.7320204e+00  -3.4548438e+00  -1.3403759e+00
   2.0711915e+01  -2.8934415e+01   2.0000000e+02  -7.9788583e+00  -3.3083128e+00  -1.4711946e+00
   2.0848732e+01  -2.8981720e+01   2.0000000e+02  -8.1874629e+00  -3.1186192e+00  -1.6293005e+00
   2.0987242e+01  -2.9025238e+01   2.0000000e+02  -8.3546171e+00  -2.8792770e+00  -1.8104479e+00
   2.1127305e+01  -2.9064927e+01   2.0000000e+02  -8.4763659e+00  -2.5844163e+00  -2.0089557e+00
   2.1268778e+01  -2.9100743e+01   2.0000000e+02  -8.5484643e+00  -2.2282016e+00  -2.2175410e+00
   2.1411518e+01  -2.9132651e+01   2.0000000e+02  -8.5668492e+00  -1.8044929e+00  -2.4264478e+00
   2.1555379e+01  -2.9160617e+01   2.0000000e+02  -8.5280447e+00  -1.3071819e+00  -2.6223683e+00
   2.1700213e+01  -2.9184612e+01   2.0000000e+02  -8.4295216e+00  -7.3138553e-01  -2.7874372e+00
   2.1845873e+01  -2.9204611e+01   2.0000000e+02  -8.2700252e+00  -7.5442148e-02  -2.8989801e+00
   2.1992207e+01  -2.9220594e+01   2.0000000e+02  -8.0499453e+00   6.5663466e-01  -2.9304402e+00
   2.2139067e+01  -2.9232544e+01   2.0000000e+02  -7.7717283e+00   1.4530317e+00  -2.8537770e+00
   2.2286299e+01  -2.9240449e+01   2.0000000e+02  -7.4403486e+00   2.2929268e+00  -2.6430345e+00
   2.2433751e+01  -2.9244300e+01   2.0000000e+02  -7.0636470e+00   3.1469965e+00  -2.2785224e+00
   2.2581273e+01  -2.9244093e+01   2.0000000e+02  -6.6523962e+00   3.9796837e+00  -1.7505890e+00
   2.2728710e+01  -2.9239829e+01   2.0000000e+02  -6.2199344e+00   4.7529161e+00  -1.0621380e+00
   2.2875911e+01  -2.9231512e+01   2.0000000e+02  -5.7812449e+00   5.4306395e+00  -2.2914158e-01
   2.3022724e+01  -2.9219151e+01   2.0000000e+02  -5.3516731e+00   5.9829911e+00   7.2089845e-01
   2.3168997e+01  -2.9202758e+01   2.0000000e+02  -4.9454625e+00   6.3893999e+00   1.7521478e+00
   2.3314579e+01  -2.9182350e+01   2.0000000e+02  -4.5744180e+00   6.6400821e+00   2.8245259e+00
   2.3459321e+01  -2.9157949e+01   2.0000000e+02  -4.2469478e+00   6.7359522e+00   3.8978178e+00
   2.3603074e+01  -2.9129581e+01   2.0000000e+02  -3.9676425e+00   6.6873002e+00   4.9351569e+00
   2.3745692e+01  -2.9097273e+01   2.0000000e+02  -3.7373986e+00   6.5117150e+00   5.9056131e+00
   2.3887028e+01  -2.9061061e+01   2.0000000e+02  -3.5540007e+00   6.2316565e+00   6.7857311e+00
   2.4026939e+01  -2.9020980e+01   2.0000000e+02  -3.4130430e+00   5.8720316e+00   7.5601879e+00
   2.4165283e+01  -2.8977074e+01   2.0000000e+02  -3.3089418e+00   5.4579199e+00   8.2215778e+00
   2.4301920e+01  -2.8929386e+01   2.0000000e+02  -3.2359378e+00   5.0126862e+00   8.7695304e+00
   2.4436714e+01  -2.8877967e+01   2.0000000e+02  -3.1888203e+00   4.5565353e+00   9.2093226e+00
   2.4569529e+01  -2.8822868e+01   2.0000000e+02  -3.1634191e+00   4.1057057e+00   9.5501859e+00
   2.5284045e+01  -2.8598997e+01   2.0000000e+02  -2.7318852e+00   1.6908205e+00   1.0224891e+01
   2.5402001e+01  -2.8523370e+01   2.0000000e+02  -2.8078311e+00   1.4174754e+00   1.0197804e+01
   2.5517216e+01  -2.8444644e+01   2.0000000e+02  -2.8980512e+00   1.1713372e+00   1.0144525e+01
   2.5629585e+01  -2.8362894e+01   2.0000000e+02  -3.0015974e+00   9.5058416e-01   1.0067346e+01
   2.5739012e+01  -2.8278198e+01   2.0000000e+02  -3.1171652e+00   7.5432443e-01   9.9669362e+00
   2.5845402e+01  -2.8190634e+01   2.0000000e+02  -3.2429825e+00   5.8301490e-01   9.8429988e+00
   2.5948661e+01  -2.8100286e+01   2.0000000e+02  -3.3768069e+00   4.3854013e-01   9.6951345e+00
   2.6048704e+01  -2.8007237e+01   2.0000000e+02  -3.5161995e+00   3.2391584e-01   9.5237247e+00
   2.6145445e+01  -2.7911575e+01   2.0000000e+02  -3.6590235e+00   2.4266241e-01   9.3305973e+00
   2.6238805e+01  -2.7813389e+01   2.0000000e+02  -3.8040753e+00   1.9791480e-01   9.1192052e+00
   2.6328707e+01  -2.7712769e+01   2.0000000e+02  -3.9516672e+00   1.9155033e-01   8.8942431e+00
   2.6415077e+01  -2.7609809e+01   2.0000000e+02  -4.1039291e+00   2.2349343e-01   8.6607487e+00
   2.6497849e+01  -2.7504604e+01   2.0000000e+02  -4.2646957e+00   2.9138835e-01   8.4228783e+00
   2.6576956e+01  -2.7397250e+01   2.0000000e+02  -4.4389116e+00   3.9072696e-01   8.1826823e+00
   2.6652337e+01  -2.7287846e+01   2.0000000e+02  -4.6315354e+00   5.1532546e-01   7.9391926e+00
   2.6723936e+01  -2.7176491e+01   2.0000000e+02  -4.8461945e+00   6.5810807e-01   7.6881250e+00
   2.6791700e+01  -2.7063287e+01   2.0000000e+02  -5.0838454e+00   8.1196954e-01   7.4223806e+00
   2.6855579e+01  -2.6948337e+01   2.0000000e+02  -5.3418302e+00   9.7053989e-01   7.1332885e+00
   2.6915529e+01  -2.6831743e+01   2.0000000e+02  -5.6136195e+00   1.1286759e+00   6.8123310e+00
   2.6971508e+01  -2.6713612e+01   2.0000000e+02  -5.8893650e+00   1.2826036e+00   6.4529284e+00
   2.7023479e+01  -2.6594048e+01   2.0000000e+02  -6.1571902e+00   1.4297744e+00   6.0517494e+00
   2.7071409e+01  -2.6473160e+01   2.0000000e+02  -6.4048148e+00   1.5685249e+00   5.6093062e+00
   2.7115268e+01  -2.6351054e+01   2.0000000e+02  -6.6211717e+00   1.6977565e+00   5.1296575e+00
   2.7155030e+01  -2.6227838e+01   2.0000000e+02  -6.7975622e+00   1.8167115e+00   4.6195249e+00
   2.7190675e+01  -2.6103623e+01   2.0000000e+02  -6.9282101e+00   1.9249187e+00   4.0871278e+00
   2.7222184e+01  -2.5978518e+01   2.0000000e+02  -7.0102306e+00   2.0222664e+00   3.5410858e+00
   2.7249543e+01  -2.5852632e+01   2.0000000e+02  -7.0431652e+00   2.1090860e+00   2.9897490e+00
   2.7272741e+01  -2.5726075e+01   2.0000000e+02  -7.0283990e+00   2.1861837e+00   2.4409820e+00
   2.7291773e+01  -2.5598959e+01   2.0000000e+02  -6.9687158e+00   2.2547764e+00   1.9023130e+00
   2.7306634e+01  -2.5471393e+01   2.0000000e+02  -6.8681536e+00   2.3163571e+00   1.3811417e+00
   2.7317326e+01  -2.5343488e+01   2.0000000e+02  -6.7321414e+00   2.3725321e+00   8.8482724e-01
   2.7323852e+01  -2.5215355e+01   2.0000000e+02  -6.5677565e+00   2.4248965e+00   4.2032713e-01
   2.7326221e+01  -2.5087105e+01   2.0000000e+02  -6.3838310e+00   2.4749511e+00  -6.5507904e-03
   2.7324443e+01  -2.4958846e+01   2.0000000e+02  -6.1906973e+00   2.5240199e+00  -3.9217042e-01
   2.7318532e+01  -2.4830689e+01   2.0000000e+02  -5.9994947e+00   2.5730966e+00  -7.3601290e-01
   2.7308508e+01  -2.4702744e+01   2.0000000e+02  -5.8210767e+00   2.6225704e+00  -1.0413424e+00
   2.7294390e+01  -2.4575119e+01   2.0000000e+02  -5.6647099e+00   2.6718218e+00  -1.3153611e+00
   2.7276203e+01  -2.4447922e+01   2.0000000e+02  -5.5367593e+00   2.7187942e+00  -1.5687273e+00
   2.7253974e+01  -2.4321261e+01   2.0000000e+02  -5.4395655e+00   2.7596641e+00  -1.8144928e+00
   2.7227735e+01  -2.4195243e+01   2.0000000e+02  -5.3707115e+00   2.7887840e+00  -2.0664883e+00
   2.7197519e+01  -2.4069973e+01   2.0000000e+02  -5.3228952e+00   2.7989910e+00  -2.3373405e+00
   2.7163362e+01  -2.3945558e+01   2.0000000e+02  -5.2845868e+00   2.7823208e+00  -2.6363670e+00
   2.7125304e+01  -2.3822100e+01   2.0000000e+02  -5.2415500e+00   2.7310307e+00  -2.9677970e+00
   2.7083388e+01  -2.3699702e+01   2.0000000e+02  -5.1791112e+00   2.6387260e+00  -3.3297635e+00
   2.7037658e+01  -2.3578467e+01   2.0000000e+02  -5.0847716e+00   2.5013386e+00  -3.7144897e+00
   2.6988164e+01  -2.3458495e+01   2.0000000e+02  -4.9505549e+00   2.3177058e+00  -4.1097646e+00
   2.6934955e+01  -2.3339886e+01   2.0000000e+02  -4.7744249e+00   2.0895743e+00  -4.5014777e+00
   2.6878085e+01  -2.3222737e+01   2.0000000e+02  -4.5603338e+00   1.8210424e+00  -4.8765139e+00
   2.6817610e+01  -2.3107144e+01   2.0000000e+02  -4.3168515e+00   1.5175760e+00  -5.2252419e+00
   2.6753589e+01  -2.2993204e+01   2.0000000e+02  -4.0547877e+00   1.1848731e+00  -5.5428673e+00
   2.6686081e+01  -2.2881009e+01   2.0000000e+02  -3.7844888e+00   8.2783805e-01  -5.8293502e+00
   2.6615151e+01  -2.2770651e+01   2.0000000e+02  -3.5136116e+00   4.4996106e-01  -6.0879581e+00
   2.6540863e+01  -2.2662220e+01   2.0000000e+02  -3.2458559e+00   5.3173276e-02  -6.3230525e+00
   2.6463287e+01  -2.2555805e+01   2.0000000e+02  -2.9809343e+00  -3.6177254e-01  -6.5377447e+00
   2.6382491e+01  -2.2451492e+01   2.0000000e+02  -2.7155527e+00  -7.9458473e-01  -6.7321539e+00
   2.6298547e+01  -2.2349366e+01   2.0000000e+02  -2.4450556e+00  -1.2445464e+00  -6.9026451e+00
   2.6211531e+01  -2.2249510e+01   2.0000000e+02  -2.1651527e+00  -1.7097599e+00  -7.0421776e+00
   2.6121518e+01  -2.2152005e+01   2.0000000e+02  -1.8732676e+00  -2.1867098e+00  -7.1415058e+00
   2.6028587e+01  -2.2056929e+01   2.0000000e+02  -1.5692796e+00  -2.6701984e+00  -7.1907773e+00
   2.5932816e+01  -2.1964359e+01   2.0000000e+02  -1.2555841e+00  -3.1536198e+00  -7.1810550e+00
   2.5834289e+01  -2.1874369e+01   2.0000000e+02  -9.3669573e-01  -3.6293966e+00  -7.1054380e+00
   2.5733089e+01  -2.1787033e+01   2.0000000e+02  -6.1859315e-01  -4.0894299e+00  -6.9596421e+00
   2.5629301e+01  -2.1702420e+01   2.0000000e+02  -3.0810437e-01  -4.5254256e+00  -6.7421670e+00
   2.5523013e+01  -2.1620598e+01   2.0000000e+02  -1.2456295e-02  -4.9290505e+00  -6.4542535e+00
   2.5414312e+01  -2.1541632e+01   2.0000000e+02   2.6100162e-01  -5.2920497e+00  -6.0998510e+00
   2.5303289e+01  -2.1465587e+01   2.0000000e+02   5.0493472e-01  -5.6064196e+00  -5.6857573e+00
   2.5190035e+01  -2.1392522e+01   2.0000000e+02   7.1219101e-01  -5.8648565e+00  -5.2218495e+00
   2.5074643e+01  -2.1322496e+01   2.0000000e+02   8.7606275e-01  -6.0614878e+00  -4.7212807e+00
   2.4957208e+01  -2.1255564e+01   2.0000000e+02   9.9071612e-01  -6.1928959e+00  -4.2003555e+00
   2.4837825e+01  -2.1191781e+01   2.0000000e+02   1.0517384e+00  -6.2592079e+00  -3.6778679e+00
   2.4716590e+01  -2.1131197e+01   2.0000000e+02   1.0566851e+00  -6.2649845e+00  -3.1738102e+00
   2.4593602e+01  -2.1073860e+01   2.0000000e+02   1.0054874e+00  -6.2195994e+00  -2.7075625e+00
   2.4468959e+01  -2.1019816e+01   2.0000000e+02   9.0059619e-01  -6.1369162e+00  -2.2958137e+00
   2.4342761e+01  -2.0969108e+01   2.0000000e+02   7.4680012e-01  -6.0342182e+00  -1.9506565e+00
   2.4215110e+01  -2.0921775e+01   2.0000000e+02   5.5074813e-01  -5.9305454e+00  -1.6782216e+00
   2.4086107e+01  -2.0877856e+01   2.0000000e+02   3.2028382e-01  -5.8447633e+00  -1.4781384e+00
   2.3955855e+01  -2.0837385e+01   2.0000000e+02   6.3725105e-02  -5.7937418e+00  -1.3438793e+00
   2.3824456e+01  -2.0800394e+01   2.0000000e+02  -2.1076084e-01  -5.7909920e+00  -1.2638185e+00
   2.3692016e+01  -2.0766913e+01   2.0000000e+02  -4.9559616e-01  -5.8459264e+00  -1.2226809e+00
   2.3558639e+01  -2.0736969e+01   2.0000000e+02  -7.8405090e-01  -5.9637205e+00  -1.2030224e+00
   2.3424429e+01  -2.0710584e+01   2.0000000e+02  -1.0703294e+00  -6.1455973e+00  -1.1865021e+00
   2.3289494e+01  -2.0687779e+01   2.0000000e+02  -1.3495450e+00  -6.3893023e+00  -1.1548332e+00
   2.3153938e+01  -2.0668574e+01   2.0000000e+02  -1.6176898e+00  -6.6895933e+00  -1.0904625e+00
   2.3017869e+01  -2.0652982e+01   2.0000000e+02  -1.8715895e+00  -7.0386012e+00  -9.7712013e-01
   2.2881394e+01  -2.0641017e+01   2.0000000e+02  -2.1088681e+00  -7.4261693e+00  -8.0030521e-01
   2.2744620e+01  -2.0632688e+01   2.0000000e+02  -2.3279152e+00  -7.8401565e+00  -5.4780648e-01
   2.2607654e+01  -2.0628000e+01   2.0000000e+02  -2.5278071e+00  -8.2668252e+00  -2.1019204e-01
   2.2470603e+01  -2.0626959e+01   2.0000000e+02  -2.7081641e+00  -8.6913252e+00   2.1881151e-01
   2.2333575e+01  -2.0629565e+01   2.0000000e+02  -2.8689556e+00  -9.0982028e+00   7.4206646e-01
   2.2196678e+01  -2.0635815e+01   2.0000000e+02  -3.0102595e+00  -9.4719065e+00   1.3589774e+00
   2.2060019e+01  -2.0645705e+01   2.0000000e+02  -3.1320324e+00  -9.7972062e+00   2.0655608e+00
   2.1923705e+01  -2.0659227e+01   2.0000000e+02  -3.2339510e+00  -1.0059539e+01   2.8545074e+00
   2.1787844e+01  -2.0676371e+01   2.0000000e+02  -3.3153595e+00  -1.0245396e+01   3.7152079e+00
   2.1652541e+01  -2.0697122e+01   2.0000000e+02  -3.3753510e+00  -1.0342870e+01   4.6337715e+00
   2.1517904e+01  -2.0721465e+01   2.0000000e+02  -3.4129319e+00  -1.0342431e+01   5.5931218e+00
   2.1384039e+01  -2.0749379e+01   2.0000000e+02  -3.4272530e+00  -1.0237910e+01   6.5734176e+00
   2.1251050e+01  -2.0780844e+01   2.0000000e+02  -3.4177932e+00  -1.0027493e+01   7.5529367e+00
   2.1119044e+01  -2.0815834e+01   2.0000000e+02  -3.3844688e+00  -9.7144632e+00   8.5093523e+00
   2.0988125e+01  -2.0854321e+01   2.0000000e+02  -3.3275936e+00  -9.3074155e+00   9.4214496e+00
   2.0858395e+01  -2.0896275e+01   2.0000000e+02  -3.2477007e+00  -8.8197686e+00   1.0270828e+01
   2.0729960e+01  -2.0941663e+01   2.0000000e+02  -3.1452738e+00  -8.2686219e+00   1.1043281e+01
   2.0602920e+01  -2.0990449e+01   2.0000000e+02  -3.0204667e+00  -7.6730431e+00   1.1729683e+01
   2.0477377e+01  -2.1042593e+01   2.0000000e+02  -2.8729188e+00  -7.0522348e+00   1.2326053e+01
   2.0353432e+01  -2.1098055e+01   2.0000000e+02  -2.7017325e+00  -6.4238178e+00   1.2832996e+01
   2.0231184e+01  -2.1156791e+01   2.0000000e+02  -2.5056771e+00  -5.8025687e+00   1.3254622e+01
   2.0110731e+01  -2.1218753e+01   2.0000000e+02  -2.2835502e+00  -5.1997778e+00   1.3597262e+01
   1.9992172e+01  -2.1283893e+01   2.0000000e+02  -2.0345962e+00  -4.6232200e+00   1.3868292e+01
   1.9875602e+01  -2.1352159e+01   2.0000000e+02  -1.7588917e+00  -4.0775698e+00   1.4075215e+01
   1.9761115e+01  -2.1423495e+01   2.0000000e+02  -1.4575625e+00  -3.5651238e+00   1.4225133e+01
   1.9648807e+01  -2.1497846e+01   2.0000000e+02  -1.1327728e+00  -3.0865685e+00   1.4324536e+01
   1.9538769e+01  -2.1575152e+01   2.0000000e+02  -7.8754710e-01  -2.6416077e+00   1.4379304e+01
   1.9431092e+01  -2.1655351e+01   2.0000000e+02  -4.2543590e-01  -2.2294541e+00   1.4394775e+01
   1.9325865e+01  -2.1738378e+01   2.0000000e+02  -5.0155591e-02  -1.8491102e+00   1.4375783e+01
   1.9223177e+01  -2.1824168e+01   2.0000000e+02   3.3472728e-01  -1.4995263e+00   1.4326629e+01
   1.9123113e+01  -2.1912651e+01   2.0000000e+02   7.2596886e-01  -1.1796711e+00   1.4250976e+01
   1.9025759e+01  -2.2003757e+01   2.0000000e+02   1.1207170e+00  -8.8858354e-01   1.4151768e+01
   1.8931196e+01  -2.2097411e+01   2.0000000e+02   1.5164452e+00  -6.2537502e-01   1.4031188e+01
   1.8839507e+01  -2.2193539e+01   2.0000000e+02   1.9108622e+00  -3.8921701e-01   1.3890700e+01
   1.8750770e+01  -2.2292062e+01   2.0000000e+02   2.3017762e+00  -1.7925754e-01   1.3731131e+01
   1.8665063e+01  -2.2392902e+01   2.0000000e+02   2.6870045e+00   5.4738872e-03   1.3552770e+01
   1.8582461e+01  -2.2495976e+01   2.0000000e+02   3.0642473e+00   1.6616180e-01   1.3355436e+01
   1.8503037e+01  -2.2601201e+01   2.0000000e+02   3.4309900e+00   3.0423479e-01   1.3138541e+01
   1.8426863e+01  -2.2708492e+01   2.0000000e+02   3.7843771e+00   4.2129827e-01   1.2901192e+01
   1.8354007e+01  -2.2817760e+01   2.0000000e+02   4.1211152e+00   5.1898430e-01   1.2642374e+01
   1.8284537e+01  -2.2928917e+01   2.0000000e+02   4.4374868e+00   5.9873386e-01   1.2361254e+01
   1.8218518e+01  -2.3041873e+01   2.0000000e+02   4.7294746e+00   6.6160437e-01   1.2057560e+01
   1.8156010e+01  -2.3156533e+01   2.0000000e+02   4.9930577e+00   7.0815594e-01   1.1731972e+01
   1.8097074e+01  -2.3272805e+01   2.0000000e+02   5.2246950e+00   7.3843319e-01   1.1386382e+01
   1.8041768e+01  -2.3390593e+01   2.0000000e+02   5.4218307e+00   7.5211452e-01   1.1023930e+01
   1.7990146e+01  -2.3509799e+01   2.0000000e+02   5.5833711e+00   7.4875691e-01   1.0648734e+01
   1.7942261e+01  -2.3630324e+01   2.0000000e+02   5.7099592e+00   7.2807241e-01   1.0265322e+01
   1.7898162e+01  -2.3752070e+01   2.0000000e+02   5.8039238e+00   6.9018259e-01   9.8778788e+00
   1.7857895e+01  -2.3874935e+01   2.0000000e+02   5.8688588e+00   6.3576640e-01   9.4894935e+00
   1.7821506e+01  -2.3998817e+01   2.0000000e+02   5.9089013e+00   5.6604083e-01   9.1015813e+00
   1.7789035e+01  -2.4123612e+01   2.0000000e+02   5.9278003e+00   4.8263214e-01   8.7136646e+00
   1.7760520e+01  -2.4249215e+01   2.0000000e+02   5.9280071e+00   3.8729912e-01   8.3236081e+00
   1.7735997e+01  -2.4375522e+01   2.0000000e+02   5.9099812e+00   2.8162258e-01   7.9282888e+00
   1.7715499e+01  -2.4502426e+01   2.0000000e+02   5.8719000e+00   1.6674499e-01   7.5245953e+00
   1.7699054e+01  -2.4629820e+01   2.0000000e+02   5.8098770e+00   4.3214691e-02   7.1104956e+00
   1.7686689e+01  -2.4757596e+01   2.0000000e+02   5.7186646e+00  -8.9029446e-02   6.6859428e+00
   1.7678427e+01  -2.4885645e+01   2.0000000e+02   5.5926644e+00  -2.3048036e-01   6.2533782e+00
   1.7674288e+01  -2.5013859e+01   2.0000000e+02   5.4270156e+00  -3.8177341e-01   5.8177315e+00
   1.7674287e+01  -2.5142128e+01   2.0000000e+02   5.2185191e+00  -5.4331540e-01   5.3859806e+00
   1.7678438e+01  -2.5270341e+01   2.0000000e+02   4.9662440e+00  -7.1497034e-01   4.9664025e+00
   1.7686750e+01  -2.5398390e+01   2.0000000e+02   4.6717552e+00  -8.9581435e-01   4.5677075e+00
   1.7699230e+01  -2.5526163e+01   2.0000000e+02   4.3390796e+00  -1.0840694e+00   4.1982645e+00
   1.7715881e+01  -2.5653549e+01   2.0000000e+02   3.9744625e+00  -1.2772055e+00   3.8654080e+00
   1.7736700e+01  -2.5780439e+01   2.0000000e+02   3.5860375e+00  -1.4721911e+00   3.5748786e+00
   1.7761684e+01  -2.5906722e+01   2.0000000e+02   3.1834543e+00  -1.6658697e+00   3.3303459e+00
   1.7790825e+01  -2.6032286e+01   2.0000000e+02   2.7773854e+00  -1.8553030e+00   3.1329707e+00
   1.7824110e+01  -2.6157023e+01   2.0000000e+02   2.3788688e+00  -2.0380765e+00   2.9810580e+00
   1.7861523e+01  -2.6280823e+01   2.0000000e+02   1.9985143e+00  -2.2124960e+00   2.8699052e+00
   1.7903046e+01  -2.6403575e+01   2.0000000e+02   1.6455587e+00  -2.3776594e+00   2.7919167e+00
   1.7948655e+01  -2.6525172e+01   2.0000000e+02   1.3269071e+00  -2.5333935e+00   2.7370664e+00
   1.7998322e+01  -2.6645506e+01   2.0000000e+02   1.0463570e+00  -2.6801425e+00   2.6936799e+00
   1.8052016e+01  -2.6764468e+01   2.0000000e+02   8.0410115e-01  -2.8188032e+00   2.6494350e+00
   1.8109704e+01  -2.6881953e+01   2.0000000e+02   5.9660977e-01  -2.9505185e+00   2.5924373e+00
   1.8171344e+01  -2.6997854e+01   2.0000000e+02   4.1693904e-01  -3.0764109e+00   2.5122278e+00
   1.8236896e+01  -2.7112068e+01   2.0000000e+02   2.5534534e-01  -3.1973447e+00   2.4005794e+00
   1.8306311e+01  -2.7224492e+01   2.0000000e+02   1.0016643e-01  -3.3135977e+00   2.2520799e+00
   1.8379539e+01  -2.7335022e+01   2.0000000e+02  -6.1201100e-02  -3.4246365e+00   2.0644579e+00
   1.8456526e+01  -2.7443559e+01   2.0000000e+02  -2.4129645e-01  -3.5289320e+00   1.8387179e+00
   1.8537213e+01  -2.7550003e+01   2.0000000e+02  -4.5162957e-01  -3.6239562e+00   1.5791240e+00
   1.8621536e+01  -2.7654256e+01   2.0000000e+02  -7.0180612e-01  -3.7063749e+00   1.2930382e+00
   1.8709430e+01  -2.7756224e+01   2.0000000e+02  -9.9876594e-01  -3.7724741e+00   9.9058736e-01
   1.8800824e+01  -2.7855811e+01   2.0000000e+02  -1.3461316e+00  -3.8187611e+00   6.8413208e-01
   1.8895644e+01  -2.7952925e+01   2.0000000e+02  -1.7437795e+00  -3.8426726e+00   3.8741389e-01
   1.8993812e+01  -2.8047477e+01   2.0000000e+02  -2.1876815e+00  -3.8432457e+00   1.1440220e-01
   1.9095245e+01  -2.8139378e+01   2.0000000e+02  -2.6701132e+00  -3.8216046e+00  -1.2211282e-01
   1.9199858e+01  -2.8228542e+01   2.0000000e+02  -3.1803109e+00  -3.7811021e+00  -3.1203416e-01
   1.9307562e+01  -2.8314886e+01   2.0000000e+02  -3.7055162e+00  -3.7270257e+00  -4.4930497e-01
   1.9418263e+01  -2.8398328e+01   2.0000000e+02  -4.2322984e+00  -3.6658811e+00  -5.3284040e-01
   1.9531865e+01  -2.8478790e+01   2.0000000e+02  -4.7479875e+00  -3.6043312e+00  -5.6681589e-01
   1.9648269e+01  -2.8556195e+01   2.0000000e+02  -5.2419185e+00  -3.5480008e+00  -5.6019213e-01
   1.9767369e+01  -2.8630471e+01   2.0000000e+02  -5.7062961e+00  -3.5003650e+00  -5.2550212e-01
   1.9889061e+01  -2.8701547e+01   2.0000000e+02  -6.1365197e+00  -3.4620285e+00  -4.7717513e-01
   2.0013234e+01  -2.8769354e+01   2.0000000e+02  -6.5309011e+00  -3.4304854e+00  -4.2965005e-01
   2.0139775e+01  -2.8833829e+01   2.0000000e+02  -6.8899468e+00  -3.4004427e+00  -3.9569594e-01
   2.0268567e+01  -2.8894909e+01   2.0000000e+02  -7.2153404e+00  -3.3646025e+00  -3.8526023e-01
   2.0399494e+01  -2.8952536e+01   2.0000000e+02  -7.5089421e+00  -3.3146479e+00  -4.0492627e-01
   2.0532431e+01  -2.9006654e+01   2.0000000e+02  -7.7719320e+00  -3.2422107e+00  -4.5798629e-01
   2.0667257e+01  -2.9057212e+01   2.0000000e+02  -8.0043090e+00  -3.1395792e+00  -5.4498970e-01
   2.0803844e+01  -2.9104160e+01   2.0000000e+02  -8.2046694e+00  -2.9999993e+00  -6.6446120e-01
   2.0942063e+01  -2.9147453e+01   2.0000000e+02  -8.3702962e+00  -2.8175176e+00  -8.1352238e-01
   2.1081784e+01  -2.9187049e+01   2.0000000e+02  -8.4974226e+00  -2.5864829e+00  -9.8817857e-01
   2.1222873e+01  -2.9222910e+01   2.0000000e+02  -8.5815940e+00  -2.3009374e+00  -1.1830479e+00
   2.1365196e+01  -2.9255000e+01   2.0000000e+02  -8.6180624e+00  -1.9542291e+00  -1.3905897e+00
   2.1508616e+01  -2.9283290e+01   2.0000000e+02  -8.6021626e+00  -1.5392103e+00  -1.5999050e+00
   2.1652996e+01  -2.9307750e+01   2.0000000e+02  -8.5296713e+00  -1.0492377e+00  -1.7956921e+00
   2.1798196e+01  -2.9328358e+01   2.0000000e+02  -8.3971844e+00  -4.7999804e-01  -1.9576161e+00
   2.1944077e+01  -2.9345093e+01   2.0000000e+02  -8.2025583e+00   1.6819125e-01  -2.0608535e+00
   2.2090497e+01  -2.9357939e+01   2.0000000e+02  -7.9454678e+00   8.8810689e-01  -2.0778392e+00
   2.2237314e+01  -2.9366883e+01   2.0000000e+02  -7.6280397e+00   1.6641190e+00  -1.9812899e+00
   2.2384387e+01  -2.9371917e+01   2.0000000e+02  -7.2554491e+00   2.4720017e+00  -1.7479413e+00
   2.2531571e+01  -2.9373035e+01   2.0000000e+02  -6.8363011e+00   3.2803379e+00  -1.3623363e+00
   2.2678725e+01  -2.9370237e+01   2.0000000e+02  -6.3825399e+00   4.0534721e+00  -8.1972713e-01
   2.2825705e+01  -2.9363525e+01   2.0000000e+02  -5.9088348e+00   4.7553709e+00  -1.2754154e-01
   2.2972370e+01  -2.9352906e+01   2.0000000e+02  -5.4313943e+00   5.3536996e+00   6.9504713e-01
   2.3118576e+01  -2.9338390e+01   2.0000000e+02  -4.9664718e+00   5.8232197e+00   1.6191587e+00
   2.3264182e+01  -2.9319991e+01   2.0000000e+02  -4.5287777e+00   6.1480084e+00   2.6094774e+00
   2.3409047e+01  -2.9297728e+01   2.0000000e+02  -4.1301634e+00   6.3222290e+00   3.6279255e+00
   2.3553033e+01  -2.9271622e+01   2.0000000e+02  -3.7787615e+00   6.3496700e+00   4.6371925e+00
   2.3695999e+01  -2.9241698e+01   2.0000000e+02  -3.4787211e+00   6.2423599e+00   5.6036179e+00
   2.3837809e+01  -2.9207986e+01   2.0000000e+02  -3.2304562e+00   6.0186436e+00   6.4993955e+00
   2.3978328e+01  -2.9170519e+01   2.0000000e+02  -3.0313758e+00   5.7010159e+00   7.3038825e+00
   2.4117420e+01  -2.9129332e+01   2.0000000e+02  -2.8768686e+00   5.3139138e+00   8.0041402e+00
   2.4254955e+01  -2.9084465e+01   2.0000000e+02  -2.7613253e+00   4.8815924e+00   8.5947682e+00
   2.4390802e+01  -2.9035963e+01   2.0000000e+02  -2.6790824e+00   4.4263512e+00   9.0769933e+00
   2.4524833e+01  -2.8983872e+01   2.0000000e+02  -2.6251100e+00   3.9671906e+00   9.4573061e+00
   2.4656923e+01  -2.8928242e+01   2.0000000e+02  -2.5953682e+00   3.5190312e+00   9.7457905e+00
   2.4786949e+01  -2.8869127e+01   2.0000000e+02  -2.5868725e+00   3.0925208e+00   9.9544372e+00
   2.4914790e+01  -2.8806583e+01   2.0000000e+02  -2.5975446e+00   2.6943317e+00   1.0095676e+01
   2.5040329e+01  -2.8740671e+01   2.0000000e+02  -2.6259377e+00   2.3277738e+00   1.0181258e+01
   2.5163451e+01  -2.8671454e+01   2.0000000e+02  -2.6709995e+00   1.9936006e+00   1.0221508e+01
   2.5837641e+01  -2.8373015e+01   2.0000000e+02  -2.6224668e+00   2.6230124e-01   9.9171787e+00
   2.5944205e+01  -2.8285289e+01   2.0000000e+02  -2.7492264e+00   9.3743502e-02   9.7995515e+00
   2.6047713e+01  -2.8194849e+01   2.0000000e+02  -2.8817649e+00  -4.9575879e-02   9.6601233e+00
   2.6148081e+01  -2.8101775e+01   2.0000000e+02  -3.0176907e+00  -1.6374429e-01   9.4991930e+00
   2.6245230e+01  -2.8006149e+01   2.0000000e+02  -3.1550513e+00  -2.4425263e-01   9.3187260e+00
   2.6339083e+01  -2.7908057e+01   2.0000000e+02  -3.2929460e+00  -2.8694506e-01   9.1225249e+00
   2.6429569e+01  -2.7807585e+01   2.0000000e+02  -3.4320912e+00  -2.8899983e-01   8.9158135e+00
   2.6516617e+01  -2.7704820e+01   2.0000000e+02  -3.5751459e+00  -2.4969235e-01   8.7043207e+00
   2.6600162e+01  -2.7599852e+01   2.0000000e+02  -3.7266164e+00  -1.7082656e-01   8.4930228e+00
   2.6680143e+01  -2.7492774e+01   2.0000000e+02  -3.8923104e+00  -5.6694265e-02   8.2848395e+00
   2.6756501e+01  -2.7383677e+01   2.0000000e+02  -4.0783531e+00   8.6405796e-02   8.0795735e+00
   2.6829181e+01  -2.7272657e+01   2.0000000e+02  -4.2898299e+00   2.5093412e-01   7.8734104e+00
   2.6898132e+01  -2.7159809e+01   2.0000000e+02  -4.5294038e+00   4.2906641e-01   7.6591596e+00
   2.6963308e+01  -2.7045230e+01   2.0000000e+02  -4.7961636e+00   6.1356733e-01   7.4273047e+00
   2.7024665e+01  -2.6929018e+01   2.0000000e+02  -5.0850855e+00   7.9843329e-01   7.1676589e+00
   2.7082162e+01  -2.6811273e+01   2.0000000e+02  -5.3872711e+00   9.7916696e-01   6.8712444e+00
   2.7135765e+01  -2.6692094e+01   2.0000000e+02  -5.6909718e+00   1.1527090e+00   6.5319090e+00
   2.7185439e+01  -2.6571583e+01   2.0000000e+02  -5.9831344e+00   1.3171381e+00   6.1472947e+00
   2.7231156e+01  -2.6449842e+01   2.0000000e+02  -6.2510751e+00   1.4713104e+00   5.7189653e+00
   2.7272890e+01  -2.6326972e+01   2.0000000e+02  -6.4839020e+00   1.6146013e+00   5.2517883e+00
   2.7310620e+01  -2.6203078e+01   2.0000000e+02  -6.6733823e+00   1.7467874e+00   4.7529140e+00
   2.7344327e+01  -2.6078262e+01   2.0000000e+02  -6.8142472e+00   1.8680780e+00   4.2306277e+00
   2.7373997e+01  -2.5952629e+01   2.0000000e+02  -6.9039663e+00   1.9791529e+00   3.6935074e+00
   2.7399618e+01  -2.5826283e+01   2.0000000e+02  -6.9422740e+00   2.0811520e+00   3.1499292e+00
   2.7421182e+01  -2.5699329e+01   2.0000000e+02  -6.9306577e+00   2.1755381e+00   2.6080040e+00
   2.7438684e+01  -2.5571871e+01   2.0000000e+02  -6.8720344e+00   2.2638695e+00   2.0757293e+00
   2.7452124e+01  -2.5444014e+01   2.0000000e+02  -6.7706986e+00   2.3475483e+00   1.5611614e+00
   2.7461504e+01  -2.5315862e+01   2.0000000e+02  -6.6324942e+00   2.4276427e+00   1.0723221e+00
   2.7466828e+01  -2.5187521e+01   2.0000000e+02  -6.4650354e+00   2.5048259e+00   6.1675854e-01
   2.7468106e+01  -2.5059095e+01   2.0000000e+02  -6.2777538e+00   2.5794310e+00   2.0073794e-01
   2.7465348e+01  -2.4930688e+01   2.0000000e+02  -6.0816238e+00   2.6515270e+00  -1.7174513e-01
   2.7458571e+01  -2.4802405e+01   2.0000000e+02  -5.8884916e+00   2.7209224e+00  -4.9989592e-01
   2.7447792e+01  -2.4674347e+01   2.0000000e+02  -5.7100527e+00   2.7870071e+00  -7.8682984e-01
   2.7433031e+01  -2.4546619e+01   2.0000000e+02  -5.5566044e+00   2.8484344e+00  -1.0397938e+00
   2.7414313e+01  -2.4419322e+01   2.0000000e+02  -5.4356770e+00   2.9027412e+00  -1.2698685e+00
   2.7391663e+01  -2.4292559e+01   2.0000000e+02  -5.3507668e+00   2.9460279e+00  -1.4910301e+00
   2.7365113e+01  -2.4166431e+01   2.0000000e+02  -5.3003556e+00   2.9728918e+00  -1.7185566e+00
   2.7334694e+01  -2.4041037e+01   2.0000000e+02  -5.2775279e+00   2.9766913e+00  -1.9669388e+00
   2.7300442e+01  -2.3916477e+01   2.0000000e+02  -5.2704327e+00   2.9502070e+00  -2.2475019e+00
   2.7262393e+01  -2.3792850e+01   2.0000000e+02  -5.2637592e+00   2.8865950e+00  -2.5662919e+00
   2.7220590e+01  -2.3670253e+01   2.0000000e+02  -5.2411297e+00   2.7804675e+00  -2.9227211e+00
   2.7175073e+01  -2.3548782e+01   2.0000000e+02  -5.1879921e+00   2.6288133e+00  -3.3095671e+00
   2.7125890e+01  -2.3428533e+01   2.0000000e+02  -5.0943287e+00   2.4315474e+00  -3.7143883e+00
   2.7073088e+01  -2.3309600e+01   2.0000000e+02  -4.9564046e+00   2.1914751e+00  -4.1222433e+00
   2.7016717e+01  -2.3192075e+01   2.0000000e+02  -4.7770320e+00   1.9136918e+00  -4.5188834e+00
   2.6956831e+01  -2.3076050e+01   2.0000000e+02  -4.5642640e+00   1.6045552e+00  -4.8935674e+00
   2.6893483e+01  -2.2961615e+01   2.0000000e+02  -4.3289157e+00   1.2704736e+00  -5.2407200e+00
   2.6826733e+01  -2.2848859e+01   2.0000000e+02  -4.0817096e+00   9.1683017e-01  -5.5599720e+00
   2.6756638e+01  -2.2737870e+01   2.0000000e+02  -3.8307910e+00   5.4724832e-01  -5.8547825e+00
   2.6683260e+01  -2.2628732e+01   2.0000000e+02  -3.5802924e+00   1.6337223e-01  -6.1300715e+00
   2.6606664e+01  -2.2521530e+01   2.0000000e+02  -3.3301410e+00  -2.3481263e-01  -6.3896635e+00
   2.6526914e+01  -2.2416347e+01   2.0000000e+02  -3.0769825e+00  -6.4825410e-01  -6.6342539e+00
   2.6444079e+01  -2.2313262e+01   2.0000000e+02  -2.8158511e+00  -1.0778633e+00  -6.8603772e+00
   2.6358228e+01  -2.2212356e+01   2.0000000e+02  -2.5419876e+00  -1.5235629e+00  -7.0605626e+00
   2.6269433e+01  -2.2113705e+01   2.0000000e+02  -2.2523478e+00  -1.9836210e+00  -7.2244988e+00
   2.6177765e+01  -2.2017385e+01   2.0000000e+02  -1.9464533e+00  -2.4543647e+00  -7.3407424e+00
   2.6083302e+01  -2.1923469e+01   2.0000000e+02  -1.6265565e+00  -2.9303009e+00  -7.3984768e+00
   2.5986118e+01  -2.1832028e+01   2.0000000e+02  -1.2971938e+00  -3.4045537e+00  -7.3888710e+00
   2.5886293e+01  -2.1743133e+01   2.0000000e+02  -9.6450620e-01  -3.8693559e+00  -7.3058549e+00
   2.5783907e+01  -2.1656850e+01   2.0000000e+02  -6.3550057e-01  -4.3165222e+00  -7.1463341e+00
   2.5679040e+01  -2.1573246e+01   2.0000000e+02  -3.1751977e-01  -4.7377050e+00  -6.9100482e+00
   2.5571775e+01  -2.1492382e+01   2.0000000e+02  -1.7952936e-02  -5.1245163e+00  -6.5993823e+00
   2.5462197e+01  -2.1414322e+01   2.0000000e+02   2.5585751e-01  -5.4685709e+00  -6.2193172e+00
   2.5350392e+01  -2.1339122e+01   2.0000000e+02   4.9666403e-01  -5.7616950e+00  -5.7776233e+00
   2.5236446e+01  -2.1266841e+01   2.0000000e+02   6.9742248e-01  -5.9963671e+00  -5.2852049e+00
   2.5120447e+01  -2.1197533e+01   2.0000000e+02   8.5159419e-01  -6.1665407e+00  -4.7563760e+00
   2.5002485e+01  -2.1131250e+01   2.0000000e+02   9.5364151e-01  -6.2687273e+00  -4.2087594e+00
   2.4882651e+01  -2.1068041e+01   2.0000000e+02   9.9964542e-01  -6.3031505e+00  -3.6625734e+00
   2.4761035e+01  -2.1007955e+01   2.0000000e+02   9.8789174e-01  -6.2746564e+00  -3.1392366e+00
   2.4637732e+01  -2.0951037e+01   2.0000000e+02   9.1926112e-01  -6.1930939e+00  -2.6594402e+00
   2.4512833e+01  -2.0897328e+01   2.0000000e+02   7.9729789e-01  -6.0729528e+00  -2.2409368e+00
   2.4386435e+01  -2.0846871e+01   2.0000000e+02   6.2792814e-01  -5.9322579e+00  -1.8965868e+00
   2.4258631e+01  -2.0799701e+01   2.0000000e+02   4.1884459e-01  -5.7908469e+00  -1.6329138e+00
   2.4129519e+01  -2.0755855e+01   2.0000000e+02   1.7874348e-01  -5.6684084e+00  -1.4495990e+00
   2.3999195e+01  -2.0715366e+01   2.0000000e+02  -8.3488817e-02  -5.5826176e+00  -1.3398334e+00
   2.3867758e+01  -2.0678263e+01   2.0000000e+02  -3.5944230e-01  -5.5477418e+00  -1.2914378e+00
   2.3735304e+01  -2.0644575e+01   2.0000000e+02  -6.4163969e-01  -5.5738859e+00  -1.2883693e+00
   2.3601934e+01  -2.0614326e+01   2.0000000e+02  -9.2375468e-01  -5.6668299e+00  -1.3122724e+00
   2.3467746e+01  -2.0587540e+01   2.0000000e+02  -1.2006541e+00  -5.8283205e+00  -1.3437973e+00
   2.3332841e+01  -2.0564237e+01   2.0000000e+02  -1.4683229e+00  -6.0565297e+00  -1.3635966e+00
   2.3197319e+01  -2.0544433e+01   2.0000000e+02  -1.7237584e+00  -6.3465291e+00  -1.3530402e+00
   2.3061279e+01  -2.0528143e+01   2.0000000e+02  -1.9648569e+00  -6.6906756e+00  -1.2947659e+00
   2.2924824e+01  -2.0515380e+01   2.0000000e+02  -2.1903107e+00  -7.0788959e+00  -1.1732053e+00
   2.2788054e+01  -2.0506154e+01   2.0000000e+02  -2.3995215e+00  -7.4990111e+00  -9.7512498e-01
   2.2651071e+01  -2.0500470e+01   2.0000000e+02  -2.5924611e+00  -7.9371163e+00  -6.9016950e-01
   2.2513977e+01  -2.0498334e+01   2.0000000e+02  -2.7694850e+00  -8.3781132e+00  -3.1127373e-01
   2.2376871e+01  -2.0499747e+01   2.0000000e+02  -2.9311047e+00  -8.8062963e+00   1.6509879e-01
   2.2239857e+01  -2.0504707e+01   2.0000000e+02  -3.0777158e+00  -9.2058894e+00   7.3892637e-01
   2.2103036e+01  -2.0513212e+01   2.0000000e+02  -3.2093737e+00  -9.5615140e+00   1.4068180e+00
   2.1966508e+01  -2.0525255e+01   2.0000000e+02  -3.3256446e+00  -9.8584831e+00   2.1621870e+00
   2.1830376e+01  -2.0540826e+01   2.0000000e+02  -3.4255748e+00  -1.0083057e+01   2.9953461e+00
   2.1694740e+01  -2.0559915e+01   2.0000000e+02  -3.5078007e+00  -1.0222829e+01   3.8935514e+00
   2.1559701e+01  -2.0582506e+01   2.0000000e+02  -3.5707670e+00  -1.0267325e+01   4.8409531e+00
   2.1425359e+01  -2.0608584e+01   2.0000000e+02  -3.6129931e+00  -1.0208902e+01   5.8188085e+00
   2.1291814e+01  -2.0638128e+01   2.0000000e+02  -3.6333382e+00  -1.0043791e+01   6.8060210e+00
   2.1159165e+01  -2.0671117e+01   2.0000000e+02  -3.6311682e+00  -9.7730541e+00   7.7802435e+00
   2.1027513e+01  -2.0707526e+01   2.0000000e+02  -3.6063917e+00  -9.4031465e+00   8.7193756e+00
   2.0896954e+01  -2.0747327e+01   2.0000000e+02  -3.5593270e+00  -8.9458135e+00   9.6033761e+00
   2.0767587e+01  -2.0790492e+01   2.0000000e+02  -3.4904138e+00  -8.4172784e+00   1.0415882e+01
   2.0639509e+01  -2.0836986e+01   2.0000000e+02  -3.3998764e+00  -7.8367297e+00   1.1145432e+01
   2.0512816e+01  -2.0886777e+01   2.0000000e+02  -3.2873835e+00  -7.2244187e+00   1.1786003e+01
   2.0387604e+01  -2.0939826e+01   2.0000000e+02  -3.1519055e+00  -6.5996981e+00   1.2336718e+01
   2.0263968e+01  -2.0996093e+01   2.0000000e+02  -2.9917706e+00  -5.9793574e+00   1.2800938e+01
   2.0142001e+01  -2.1055537e+01   2.0000000e+02  -2.8049814e+00  -5.3765292e+00   1.3184920e+01
   2.0021796e+01  -2.1118113e+01   2.0000000e+02  -2.5897199e+00  -4.8003072e+00   1.3496383e+01
   1.9903445e+01  -2.1183773e+01   2.0000000e+02  -2.3448902e+00  -4.2559932e+00   1.3743304e+01
   1.9787039e+01  -2.1252469e+01   2.0000000e+02  -2.0705486e+00  -3.7458063e+00   1.3933121e+01
   1.9672667e+01  -2.1324148e+01   2.0000000e+02  -1.7681433e+00  -3.2697974e+00   1.4072360e+01
   1.9560418e+01  -2.1398757e+01   2.0000000e+02  -1.4404522e+00  -2.8267465e+00   1.4166644e+01
   1.9450379e+01  -2.1476239e+01   2.0000000e+02  -1.0913119e+00  -2.4148607e+00   1.4220880e+01
   1.9342636e+01  -2.1556536e+01   2.0000000e+02  -7.2517058e-01  -2.0322379e+00   1.4239485e+01
   1.9237273e+01  -2.1639587e+01   2.0000000e+02  -3.4661895e-01  -1.6771037e+00   1.4226527e+01
   1.9134374e+01  -2.1725329e+01   2.0000000e+02   4.0019304e-02  -1.3479069e+00   1.4185736e+01
   1.9034020e+01  -2.1813697e+01   2.0000000e+02   4.3095787e-01  -1.0433278e+00   1.4120421e+01
   1.8936292e+01  -2.1904624e+01   2.0000000e+02   8.2305370e-01  -7.6227724e-01   1.4033360e+01
   1.8841268e+01  -2.1998041e+01   2.0000000e+02   1.2137826e+00  -5.0386711e-01   1.3926716e+01
   1.8749024e+01  -2.2093877e+01   2.0000000e+02   1.6011296e+00  -2.6736386e-01   1.3802026e+01
   1.8659637e+01  -2.2192059e+01   2.0000000e+02   1.9834469e+00  -5.2103482e-02   1.3660237e+01
   1.8573180e+01  -2.2292512e+01   2.0000000e+02   2.3593074e+00   1.4263800e-01   1.3501731e+01
   1.8489724e+01  -2.2395159e+01   2.0000000e+02   2.7273419e+00   3.1774894e-01   1.3326336e+01
   1.8409340e+01  -2.2499921e+01   2.0000000e+02   3.0860512e+00   4.7432310e-01   1.3133325e+01
   1.8332096e+01  -2.2606718e+01   2.0000000e+02   3.4335993e+00   6.1360876e-01   1.2921448e+01
   1.8258057e+01  -2.2715467e+01   2.0000000e+02   3.7676079e+00   7.3685290e-01   1.2689088e+01
   1.8187288e+01  -2.2826087e+01   2.0000000e+02   4.0850501e+00   8.4508055e-01   1.2434565e+01
   1.8119850e+01  -2.2938489e+01   2.0000000e+02   4.3822435e+00   9.3889727e-01   1.2156588e+01
   1.8055804e+01  -2.3052589e+01   2.0000000e+02   4.6551153e+00   1.0183464e+00   1.1854736e+01
   1.7995208e+01  -2.3168297e+01   2.0000000e+02   4.8996008e+00   1.0829147e+00   1.1529904e+01
   1.7938116e+01  -2.3285523e+01   2.0000000e+02   5.1122445e+00   1.1316766e+00   1.1184513e+01
   1.7884582e+01  -2.3404177e+01   2.0000000e+02   5.2908172e+00   1.1635487e+00   1.0822396e+01
   1.7834657e+01  -2.3524166e+01   2.0000000e+02   5.4347938e+00   1.1776262e+00   1.0448339e+01
   1.7788390e+01  -2.3645395e+01   2.0000000e+02   5.5455561e+00   1.1734824e+00   1.0067322e+01
   1.7745825e+01  -2.3767771e+01   2.0000000e+02   5.6262033e+00   1.1513710e+00   9.6836145e+00
   1.7707008e+01  -2.3891196e+01   2.0000000e+02   5.6809644e+00   1.1122531e+00   9.3000128e+00
   1.7671979e+01  -2.4015573e+01   2.0000000e+02   5.7143039e+00   1.0576832e+00   8.9173162e+00
   1.7640775e+01  -2.4140805e+01   2.0000000e+02   5.7298969e+00   9.8953065e-01   8.5342881e+00
   1.7613434e+01  -2.4266792e+01   2.0000000e+02   5.7297000e+00   9.0962072e-01   8.1481258e+00
   1.7589987e+01  -2.4393434e+01   2.0000000e+02   5.7133274e+00   8.1941492e-01   7.7553418e+00
   1.7570465e+01  -2.4520629e+01   2.0000000e+02   5.6779390e+00   7.1973649e-01   7.3529243e+00
   1.7554895e+01  -2.4648278e+01   2.0000000e+02   5.6186709e+00   6.1068079e-01   6.9394480e+00
   1.7543302e+01  -2.4776277e+01   2.0000000e+02   5.5295516e+00   4.9170602e-01   6.5159281e+00
   1.7535707e+01  -2.4904523e+01   2.0000000e+02   5.4046713e+00   3.6188861e-01   6.0861241e+00
   1.7532129e+01  -2.5032913e+01   2.0000000e+02   5.2393404e+00   2.2028463e-01   5.6563070e+00
   1.7532583e+01  -2.5161344e+01   2.0000000e+02   5.0309752e+00   6.6336541e-02   5.2345600e+00
   1.7537082e+01  -2.5289710e+01   2.0000000e+02   4.7795865e+00  -9.9791037e-02   4.8298421e+00
   1.7545634e+01  -2.5417909e+01   2.0000000e+02   4.4878306e+00  -2.7700025e-01   4.4509932e+00
   1.7558246e+01  -2.5545834e+01   2.0000000e+02   4.1607890e+00  -4.6324312e-01   4.1059444e+00
   1.7574920e+01  -2.5673382e+01   2.0000000e+02   3.8055408e+00  -6.5568120e-01   3.8010787e+00
   1.7595657e+01  -2.5800448e+01   2.0000000e+02   3.4307337e+00  -8.5101757e-01   3.5408241e+00
   1.7620451e+01  -2.5926927e+01   2.0000000e+02   3.0461256e+00  -1.0458763e+00   3.3273266e+00
   1.7649296e+01  -2.6052713e+01   2.0000000e+02   2.6621081e+00  -1.2372262e+00   3.1601944e+00
   1.7682181e+01  -2.6177704e+01   2.0000000e+02   2.2891014e+00  -1.4226638e+00   3.0363019e+00
   1.7719093e+01  -2.6301795e+01   2.0000000e+02   1.9368510e+00  -1.6005810e+00   2.9497609e+00
   1.7760012e+01  -2.6424881e+01   2.0000000e+02   1.6135775e+00  -1.7701544e+00   2.8921241e+00
   1.7804919e+01  -2.6546861e+01   2.0000000e+02   1.3251210e+00  -1.9312673e+00   2.8529044e+00
   1.7853789e+01  -2.6667631e+01   2.0000000e+02   1.0742543e+00  -2.0843064e+00   2.8204031e+00
   1.7906593e+01  -2.6787090e+01   2.0000000e+02   8.6025473e-01  -2.2299809e+00   2.7827324e+00
   1.7963299e+01  -2.6905135e+01   2.0000000e+02   6.7888156e-01  -2.3691517e+00   2.7288816e+00
   1.8023872e+01  -2.7021668e+01   2.0000000e+02   5.2272574e-01  -2.5026598e+00   2.6496531e+00
   1.8088273e+01  -2.7136588e+01   2.0000000e+02   3.8190042e-01  -2.6311514e+00   2.5383472e+00
   1.8156458e+01  -2.7249797e+01   2.0000000e+02   2.4491157e-01  -2.7548775e+00   2.3911445e+00
   1.8228383e+01  -2.7361197e+01   2.0000000e+02   9.9600648e-02  -2.8735167e+00   2.2072139e+00
   1.8303995e+01  -2.7470694e+01   2.0000000e+02  -6.5939130e-02  -2.9859787e+00   1.9886336e+00
   1.8383241e+01  -2.7578191e+01   2.0000000e+02  -2.6254393e-01  -3.0903700e+00   1.7402025e+00
   1.8466065e+01  -2.7683597e+01   2.0000000e+02  -4.9926192e-01  -3.1840406e+00   1.4691911e+00
   1.8552404e+01  -2.7786818e+01   2.0000000e+02  -7.8270614e-01  -3.2638314e+00   1.1850749e+00
   1.8642194e+01  -2.7887765e+01   2.0000000e+02  -1.1165257e+00  -3.3265074e+00   8.9913107e-01
   1.8735367e+01  -2.7986350e+01   2.0000000e+02  -1.5009730e+00  -3.3693223e+00   6.2387812e-01
   1.8831850e+01  -2.8082485e+01   2.0000000e+02  -1.9326688e+00  -3.3906351e+00   3.7225127e-01
   1.8931569e+01  -2.8176085e+01   2.0000000e+02  -2.4046823e+00  -3.3904536e+00   1.5649895e-01
   1.9034443e+01  -2.8267069e+01   2.0000000e+02  -2.9069687e+00  -3.3707404e+00  -1.3073521e-02
   1.9140391e+01  -2.8355355e+01   2.0000000e+02  -3.4272107e+00  -3.3354351e+00  -1.2937529e-01
   1.9249326e+01  -2.8440864e+01   2.0000000e+02  -3.9519907e+00  -3.2900438e+00  -1.8955105e-01
   1.9361160e+01  -2.8523521e+01   2.0000000e+02  -4.4681585e+00  -3.2408969e+00  -1.9554742e-01
   1.9475799e+01  -2.8603251e+01   2.0000000e+02  -4.9641251e+00  -3.1941566e+00  -1.5405070e-01
   1.9593148e+01  -2.8679982e+01   2.0000000e+02  -5.4309383e+00  -3.1547599e+00  -7.5762801e-02
   1.9713108e+01  -2.8753646e+01   2.0000000e+02  -5.8628797e+00  -3.1255146e+00   2.5905399e-02
   1.9835577e+01  -2.8824176e+01   2.0000000e+02  -6.2575119e+00  -3.1065676e+00   1.3645304e-01
   1.9960450e+01  -2.8891508e+01   2.0000000e+02  -6.6152114e+00  -3.0953289e+00   2.4194489e-01
   2.0087619e+01  -2.8955581e+01   2.0000000e+02  -6.9383094e+00  -3.0868613e+00   3.3037681e-01
   2.0216974e+01  -2.9016337e+01   2.0000000e+02  -7.2300616e+00  -3.0746087e+00   3.9254108e-01
   2.0348402e+01  -2.9073720e+01   2.0000000e+02  -7.4936549e+00  -3.0512662e+00   4.2231888e-01
   2.0481786e+01  -2.9127678e+01   2.0000000e+02  -7.7314242e+00  -3.0095791e+00   4.1648288e-01
   2.0617009e+01  -2.9178162e+01   2.0000000e+02  -7.9443595e+00  -2.9429056e+00   3.7412443e-01
   2.0753950e+01  -2.9225125e+01   2.0000000e+02  -8.1318898e+00  -2.8454128e+00   2.9596382e-01
   2.0892486e+01  -2.9268524e+01   2.0000000e+02  -8.2919133e+00  -2.7118751e+00   1.8376621e-01
   2.1032494e+01  -2.9308319e+01   2.0000000e+02  -8.4209927e+00  -2.5371527e+00   4.0062461e-02
   2.1173847e+01  -2.9344474e+01   2.0000000e+02  -8.5146411e+00  -2.3155446e+00  -1.3160461e-01
   2.1316416e+01  -2.9376955e+01   2.0000000e+02  -8.5676600e+00  -2.0403175e+00  -3.2593102e-01
   2.1460072e+01  -2.9405732e+01   2.0000000e+02  -8.5744826e+00  -1.7037358e+00  -5.3466916e-01
   2.1604683e+01  -2.9430779e+01   2.0000000e+02  -8.5295218e+00  -1.2978671e+00  -7.4537673e-01
   2.1750119e+01  -2.9452072e+01   2.0000000e+02  -8.4275576e+00  -8.1617785e-01  -9.4061386e-01
   2.1896245e+01  -2.9469592e+01   2.0000000e+02  -8.2642207e+00  -2.5574526e-01  -1.0979523e+00
   2.2042927e+01  -2.9483322e+01   2.0000000e+02  -8.0366163e+00   3.8047251e-01  -1.1912516e+00
   2.2190030e+01  -2.9493249e+01   2.0000000e+02  -7.7440808e+00   1.0818462e+00  -1.1930652e+00
   2.2337419e+01  -2.9499366e+01   2.0000000e+02  -7.3889674e+00   1.8293553e+00  -1.0779249e+00
   2.2484958e+01  -2.9501665e+01   2.0000000e+02  -6.9772784e+00   2.5962931e+00  -8.2596201e-01
   2.2632511e+01  -2.9500144e+01   2.0000000e+02  -6.5189025e+00   3.3503749e+00  -4.2601058e-01
   2.2779941e+01  -2.9494806e+01   2.0000000e+02  -6.0272974e+00   4.0569512e+00   1.2230739e-01
   2.2927114e+01  -2.9485655e+01   2.0000000e+02  -5.5185432e+00   4.6827525e+00   8.0801158e-01
   2.3073893e+01  -2.9472699e+01   2.0000000e+02  -5.0099367e+00   5.1993443e+00   1.6097627e+00
   2.3220143e+01  -2.9455950e+01   2.0000000e+02  -4.5183105e+00   5.5858154e+00   2.4981764e+00
   2.3365730e+01  -2.9435425e+01   2.0000000e+02  -4.0584443e+00   5.8302760e+00   3.4388836e+00
   2.3510521e+01  -2.9411142e+01   2.0000000e+02  -3.6418366e+00   5.9302038e+00   4.3957961e+00
   2.3654382e+01  -2.9383123e+01   2.0000000e+02  -3.2760133e+00   5.8917983e+00   5.3341404e+00
   2.3797183e+01  -2.9351395e+01   2.0000000e+02  -2.9644066e+00   5.7286503e+00   6.2230428e+00
   2.3938794e+01  -2.9315986e+01   2.0000000e+02  -2.7068074e+00   5.4599804e+00   7.0374414e+00
   2.4079086e+01  -2.9276930e+01   2.0000000e+02  -2.5001706e+00   5.1085852e+00   7.7593456e+00
   2.4217933e+01  -2.9234263e+01   2.0000000e+02  -2.3396423e+00   4.6986978e+00   8.3783542e+00
   2.4355209e+01  -2.9188023e+01   2.0000000e+02  -2.2195973e+00   4.2539382e+00   8.8913812e+00
   2.4490792e+01  -2.9138253e+01   2.0000000e+02  -2.1344907e+00   3.7955310e+00   9.3017068e+00
   2.4624561e+01  -2.9085000e+01   2.0000000e+02  -2.0794596e+00   3.3410457e+00   9.6174727e+00
   2.4756397e+01  -2.9028311e+01   2.0000000e+02  -2.0506082e+00   2.9037263e+00   9.8499298e+00
   2.4886184e+01  -2.8968238e+01   2.0000000e+02  -2.0449738e+00   2.4924045e+00   1.0011698e+01
   2.5013808e+01  -2.8904837e+01   2.0000000e+02  -2.0603231e+00   2.1119343e+00   1.0115296e+01
   2.5139158e+01  -2.8838164e+01   2.0000000e+02  -2.0948889e+00   1.7639518e+00   1.0172075e+01
   2.5262125e+01  -2.8768281e+01   2.0000000e+02  -2.1471180e+00   1.4477676e+00   1.0191580e+01
   2.5382605e+01  -2.8695251e+01   2.0000000e+02  -2.2155505e+00   1.1612580e+00   1.0181253e+01
   2.5500495e+01  -2.8619139e+01   2.0000000e+02  -2.2987717e+00   9.0168703e-01   1.0146365e+01
   2.5615694e+01  -2.8540015e+01   2.0000000e+02  -2.3953634e+00   6.6641073e-01   1.0090089e+01
   2.5728107e+01  -2.8457949e+01   2.0000000e+02  -2.5038326e+00   4.5350458e-01   1.0013736e+01
   2.6355445e+01  -2.8089973e+01   2.0000000e+02  -2.6872921e+00  -7.2202890e-01   9.2152960e+00
   2.6449408e+01  -2.7991713e+01   2.0000000e+02  -2.8129153e+00  -7.6225496e-01   9.0292471e+00
   2.6540080e+01  -2.7891132e+01   2.0000000e+02  -2.9381316e+00  -7.5911959e-01   8.8365521e+00
   2.6627397e+01  -2.7788315e+01   2.0000000e+02  -3.0664192e+00  -7.1139671e-01   8.6439233e+00
   2.6711295e+01  -2.7683346e+01   2.0000000e+02  -3.2032579e+00  -6.2064565e-01   8.4572225e+00
   2.6791717e+01  -2.7576312e+01   2.0000000e+02  -3.3555306e+00  -4.9121549e-01   8.2800828e+00
   2.6868606e+01  -2.7467302e+01   2.0000000e+02  -3.5305351e+00  -3.2975256e-01   8.1127930e+00
   2.6941911e+01  -2.7356404e+01   2.0000000e+02  -3.7346532e+00  -1.4437177e-01   7.9516864e+00
   2.7011584e+01  -2.7243711e+01   2.0000000e+02  -3.9719091e+00   5.6350753e-02   7.7892830e+00
   2.7077579e+01  -2.7129314e+01   2.0000000e+02  -4.2427674e+00   2.6438214e-01   7.6152174e+00
   2.7139855e+01  -2.7013306e+01   2.0000000e+02  -4.5434052e+00   4.7296128e-01   7.4178434e+00
   2.7198373e+01  -2.6895781e+01   2.0000000e+02  -4.8657608e+00   6.7697539e-01   7.1861566e+00
   2.7253098e+01  -2.6776834e+01   2.0000000e+02  -5.1983504e+00   8.7294357e-01   6.9115805e+00
   2.7303999e+01  -2.6656561e+01   2.0000000e+02  -5.5276851e+00   1.0587325e+00   6.5891950e+00
   2.7351048e+01  -2.6535059e+01   2.0000000e+02  -5.8399366e+00   1.2331838e+00   6.2181716e+00
   2.7394220e+01  -2.6412423e+01   2.0000000e+02  -6.1224715e+00   1.3958225e+00   5.8014327e+00
   2.7433492e+01  -2.6288753e+01   2.0000000e+02  -6.3649329e+00   1.5467085e+00   5.3448212e+00
   2.7468848e+01  -2.6164146e+01   2.0000000e+02  -6.5598151e+00   1.6864406e+00   4.8560315e+00
   2.7500273e+01  -2.6038700e+01   2.0000000e+02  -6.7025188e+00   1.8161827e+00   4.3436731e+00
   2.7527753e+01  -2.5912516e+01   2.0000000e+02  -6.7910645e+00   1.9376086e+00   3.8166263e+00
   2.7551281e+01  -2.5785691e+01   2.0000000e+02  -6.8256622e+00   2.0527099e+00   3.2837095e+00
   2.7570851e+01  -2.5658325e+01   2.0000000e+02  -6.8083209e+00   2.1634668e+00   2.7536538e+00
   2.7586461e+01  -2.5530518e+01   2.0000000e+02  -6.7426296e+00   2.2714824e+00   2.2351587e+00
   2.7598111e+01  -2.5402369e+01   2.0000000e+02  -6.6337402e+00   2.3776928e+00   1.7368701e+00
   2.7605805e+01  -2.5273977e+01   2.0000000e+02  -6.4884785e+00   2.4822462e+00   1.2671468e+00
   2.7609551e+01  -2.5145441e+01   2.0000000e+02  -6.3154482e+00   2.5845827e+00   8.3353145e-01
   2.7609357e+01  -2.5016861e+01   2.0000000e+02  -6.1249790e+00   2.6836502e+00   4.4196993e-01
   2.7605236e+01  -2.4888335e+01   2.0000000e+02  -5.9287933e+00   2.7781426e+00   9.5924075e-02
   2.7597204e+01  -2.4759962e+01   2.0000000e+02  -5.7393714e+00   2.8666201e+00  -2.0447623e-01
   2.7585278e+01  -2.4631839e+01   2.0000000e+02  -5.5689933e+00   2.9474406e+00  -4.6310169e-01
   2.7569480e+01  -2.4504064e+01   2.0000000e+02  -5.4285136e+00   3.0185067e+00  -6.8810009e-01
   2.7549834e+01  -2.4376734e+01   2.0000000e+02  -5.3259500e+00   3.0769215e+00  -8.9167776e-01
   2.7526364e+01  -2.4249945e+01   2.0000000e+02  -5.2650648e+00   3.1187001e+00  -1.0891970e+00
   2.7499101e+01  -2.4123793e+01   2.0000000e+02  -5.2442067e+00   3.1387033e+00  -1.2974928e+00
   2.7468076e+01  -2.3998372e+01   2.0000000e+02  -5.2557806e+00   3.1308816e+00  -1.5325875e+00
   2.7433323e+01  -2.3873777e+01   2.0000000e+02  -5.2866809e+00   3.0888854e+00  -1.8070408e+00
   2.7394878e+01  -2.3750101e+01   2.0000000e+02  -5.3198892e+00   3.0069571e+00  -2.1275504e+00
   2.7352780e+01  -2.3627436e+01   2.0000000e+02  -5.3371300e+00   2.8809333e+00  -2.4934522e+00
   2.7307070e+01  -2.3505874e+01   2.0000000e+02  -5.3220897e+00   2.7091051e+00  -2.8967060e+00
   2.7257792e+01  -2.3385504e+01   2.0000000e+02  -5.2634077e+00   2.4926837e+00  -3.3235634e+00
   2.7204991e+01  -2.3266416e+01   2.0000000e+02  -5.1565793e+00   2.2357124e+00  -3.7575865e+00
   2.7148715e+01  -2.3148697e+01   2.0000000e+02  -5.0042052e+00   1.9443994e+00  -4.1832042e+00
   2.7089014e+01  -2.3032435e+01   2.0000000e+02  -4.8145298e+00   1.6260395e+00  -4.5887829e+00
   2.7025940e+01  -2.2917715e+01   2.0000000e+02  -4.5987622e+00   1.2877588e+00  -4.9683802e+00
   2.6959549e+01  -2.2804620e+01   2.0000000e+02  -4.3680255e+00   9.3539208e-01  -5.3217664e+00
   2.6889895e+01  -2.2693235e+01   2.0000000e+02  -4.1307648e+00   5.7271883e-01  -5.6528982e+00
   2.6817037e+01  -2.2583640e+01   2.0000000e+02  -3.8912647e+00   2.0117714e-01  -5.9673894e+00
   2.6741035e+01  -2.2475915e+01   2.0000000e+02  -3.6494558e+00  -1.7987074e-01  -6.2697707e+00
   2.6661951e+01  -2.2370139e+01   2.0000000e+02  -3.4018867e+00  -5.7242548e-01  -6.5612644e+00
   2.6579849e+01  -2.2266389e+01   2.0000000e+02  -3.1434253e+00  -9.7884836e-01  -6.8385959e+00
   2.6494794e+01  -2.2164739e+01   2.0000000e+02  -2.8691411e+00  -1.4008057e+00  -7.0940371e+00
   2.6406854e+01  -2.2065263e+01   2.0000000e+02  -2.5758738e+00  -1.8383885e+00  -7.3165152e+00
   2.6316096e+01  -2.1968034e+01   2.0000000e+02  -2.2631304e+00  -2.2896295e+00  -7.4933898e+00
   2.6222593e+01  -2.1873121e+01   2.0000000e+02  -1.9332664e+00  -2.7504425e+00  -7.6123565e+00
   2.6126416e+01  -2.1780593e+01   2.0000000e+02  -1.5910328e+00  -3.2149448e+00  -7.6629921e+00
   2.6027637e+01  -2.1690516e+01   2.0000000e+02  -1.2428207e+00  -3.6759798e+00  -7.6376981e+00
   2.5926334e+01  -2.1602955e+01   2.0000000e+02  -8.9588652e-01  -4.1256297e+00  -7.5320134e+00
   2.5822581e+01  -2.1517973e+01   2.0000000e+02  -5.5772873e-01  -4.5556335e+00  -7.3444502e+00
   2.5716457e+01  -2.1435631e+01   2.0000000e+02  -2.3579131e-01  -4.9575619e+00  -7.0761924e+00
   2.5608040e+01  -2.1355988e+01   2.0000000e+02   6.2622719e-02  -5.3228840e+00  -6.7308685e+00
   2.5497412e+01  -2.1279101e+01   2.0000000e+02   3.3029523e-01  -5.6430103e+00  -6.3146296e+00
   2.5384653e+01  -2.1205024e+01   2.0000000e+02   5.6009807e-01  -5.9095386e+00  -5.8364710e+00
   2.5269847e+01  -2.1133811e+01   2.0000000e+02   7.4515056e-01  -6.1147973e+00  -5.3087147e+00
   2.5153077e+01  -2.1065512e+01   2.0000000e+02   8.7924166e-01  -6.2527823e+00  -4.7472738e+00
   2.5034429e+01  -2.1000176e+01   2.0000000e+02   9.5743698e-01  -6.3203224e+00  -4.1714747e+00
   2.4913988e+01  -2.0937849e+01   2.0000000e+02   9.7677038e-01  -6.3182609e+00  -3.6031516e+00
   2.4791842e+01  -2.0878576e+01   2.0000000e+02   9.3682022e-01  -6.2523178e+00  -3.0650683e+00
   2.4668078e+01  -2.0822399e+01   2.0000000e+02   8.4000983e-01  -6.1333566e+00  -2.5787860e+00
   2.4542785e+01  -2.0769358e+01   2.0000000e+02   6.9152456e-01  -5.9768916e+00  -2.1624094e+00
   2.4416053e+01  -2.0719489e+01   2.0000000e+02   4.9883973e-01  -5.8018436e+00  -1.8285961e+00
   2.4287972e+01  -2.0672830e+01   2.0000000e+02   2.7095918e-01  -5.6287526e+00  -1.5832505e+00
   2.4158634e+01  -2.0629412e+01   2.0000000e+02   1.7501933e-02  -5.4777632e+00  -1.4251199e+00
   2.4028130e+01  -2.0589266e+01   2.0000000e+02  -2.5215815e-01  -5.3668014e+00  -1.3463210e+00
   2.3896552e+01  -2.0552422e+01   2.0000000e+02  -5.2956746e-01  -5.3102408e+00  -1.3335740e+00
   2.3763993e+01  -2.0518904e+01   2.0000000e+02  -8.0761493e-01  -5.3181997e+00  -1.3697910e+00
   2.3630548e+01  -2.0488737e+01   2.0000000e+02  -1.0806729e+00  -5.3964546e+00  -1.4356569e+00
   2.3496310e+01  -2.0461942e+01   2.0000000e+02  -1.3445707e+00  -5.5467428e+00  -1.5109582e+00
   2.3361374e+01  -2.0438538e+01   2.0000000e+02  -1.5964346e+00  -5.7672387e+00  -1.5755640e+00
   2.3225834e+01  -2.0418541e+01   2.0000000e+02  -1.8345102e+00  -6.0530108e+00  -1.6101271e+00
   2.3089785e+01  -2.0401965e+01   2.0000000e+02  -2.0579834e+00  -6.3963750e+00  -1.5966338e+00
   2.2953324e+01  -2.0388823e+01   2.0000000e+02  -2.2668197e+00  -6.7871727e+00  -1.5189334e+00
   2.2816545e+01  -2.0379124e+01   2.0000000e+02  -2.4616127e+00  -7.2130835e+00  -1.3633038e+00
   2.2679544e+01  -2.0372873e+01   2.0000000e+02  -2.6433794e+00  -7.6600262e+00  -1.1190081e+00
   2.2542418e+01  -2.0370077e+01   2.0000000e+02  -2.8133141e+00  -8.1127269e+00  -7.7871548e-01
   2.2405262e+01  -2.0370736e+01   2.0000000e+02  -2.9725130e+00  -8.5553566e+00  -3.3872734e-01
   2.2268172e+01  -2.0374850e+01   2.0000000e+02  -3.1216809e+00  -8.9721320e+00   2.0109403e-01
   2.2131245e+01  -2.0382417e+01   2.0000000e+02  -3.2609040e+00  -9.3477597e+00   8.3757178e-01
   2.1994576e+01  -2.0393431e+01   2.0000000e+02  -3.3895366e+00  -9.6676974e+00   1.5645204e+00
   2.1858260e+01  -2.0407884e+01   2.0000000e+02  -3.5062239e+00  -9.9182968e+00   2.3729329e+00
   2.1722394e+01  -2.0425766e+01   2.0000000e+02  -3.6090680e+00  -1.0087017e+01   3.2509751e+00
   2.1587073e+01  -2.0447065e+01   2.0000000e+02  -3.6959075e+00  -1.0162893e+01   4.1839081e+00
   2.1452392e+01  -2.0471765e+01   2.0000000e+02  -3.7646434e+00  -1.0137322e+01   5.1540632e+00
   2.1318446e+01  -2.0499849e+01   2.0000000e+02  -3.8135470e+00  -1.0005120e+01   6.1411786e+00
   2.1185328e+01  -2.0531297e+01   2.0000000e+02  -3.8414885e+00  -9.7656104e+00   7.1232408e+00
   2.1053132e+01  -2.0566086e+01   2.0000000e+02  -3.8480171e+00  -9.4234460e+00   8.0778336e+00
   2.0921953e+01  -2.0604193e+01   2.0000000e+02  -3.8332578e+00  -8.9888624e+00   8.9838912e+00
   2.0791883e+01  -2.0645591e+01   2.0000000e+02  -3.7976393e+00  -8.4771592e+00   9.8235141e+00
   2.0663013e+01  -2.0690249e+01   2.0000000e+02  -3.7414871e+00  -7.9074380e+00   1.0583459e+01
   2.0535436e+01  -2.0738137e+01   2.0000000e+02  -3.6645787e+00  -7.3007702e+00   1.1256022e+01
   2.0409243e+01  -2.0789220e+01   2.0000000e+02  -3.5658353e+00  -6.6780621e+00   1.1839116e+01
   2.0284523e+01  -2.0843462e+01   2.0000000e+02  -3.4432284e+00  -6.0580593e+00   1.2335554e+01
   2.0161365e+01  -2.0900825e+01   2.0000000e+02  -3.2940035e+00  -5.4558386e+00   1.2751703e+01
   2.0039859e+01  -2.0961268e+01   2.0000000e+02  -3.1151904e+00  -4.8820094e+00   1.3095874e+01
   1.9920092e+01  -2.1024748e+01   2.0000000e+02  -2.9042770e+00  -4.3426665e+00   1.3376811e+01
   1.9802151e+01  -2.1091220e+01   2.0000000e+02  -2.6598751e+00  -3.8400285e+00   1.3602545e+01
   1.9686120e+01  -2.1160637e+01   2.0000000e+02  -2.3822031e+00  -3.3734471e+00   1.3779796e+01
   1.9572085e+01  -2.1232948e+01   2.0000000e+02  -2.0732772e+00  -2.9405552e+00   1.3913873e+01
   1.9460129e+01  -2.1308104e+01   2.0000000e+02  -1.7367411e+00  -2.5382324e+00   1.4008952e+01
   1.9350335e+01  -2.1386049e+01   2.0000000e+02  -1.3774831e+00  -2.1633271e+00   1.4068478e+01
   1.9242784e+01  -2.1466728e+01   2.0000000e+02  -1.0010322e+00  -1.8130486e+00   1.4095555e+01
   1.9137555e+01  -2.1550084e+01   2.0000000e+02  -6.1297668e-01  -1.4851202e+00   1.4093168e+01
   1.9034727e+01  -2.1636057e+01   2.0000000e+02  -2.1847493e-01  -1.1777830e+00   1.4064235e+01
   1.8934378e+01  -2.1724585e+01   2.0000000e+02   1.7807421e-01  -8.8972598e-01   1.4011518e+01
   1.8836583e+01  -2.1815605e+01   2.0000000e+02   5.7317394e-01  -6.2000393e-01   1.3937494e+01
   1.8741417e+01  -2.1909051e+01   2.0000000e+02   9.6420179e-01  -3.6796798e-01   1.3844241e+01
   1.8648953e+01  -2.2004856e+01   2.0000000e+02   1.3493024e+00  -1.3316657e-01   1.3733379e+01
   1.8559262e+01  -2.2102951e+01   2.0000000e+02   1.7272237e+00   8.4777134e-02   1.3606044e+01
   1.8472415e+01  -2.2203264e+01   2.0000000e+02   2.0971341e+00   2.8630296e-01   1.3462856e+01
   1.8388478e+01  -2.2305724e+01   2.0000000e+02   2.4584349e+00   4.7204186e-01   1.3303841e+01
   1.8307520e+01  -2.2410257e+01   2.0000000e+02   2.8104996e+00   6.4283889e-01   1.3128352e+01
   1.8229604e+01  -2.2516785e+01   2.0000000e+02   3.1523922e+00   7.9969719e-01   1.2935041e+01
   1.8154795e+01  -2.2625233e+01   2.0000000e+02   3.4826011e+00   9.4358689e-01   1.2721965e+01
   1.8083152e+01  -2.2735520e+01   2.0000000e+02   3.7987945e+00   1.0752227e+00   1.2486891e+01
   1.8014736e+01  -2.2847567e+01   2.0000000e+02   4.0977724e+00   1.1948261e+00   1.2227765e+01
   1.7949604e+01  -2.2961291e+01   2.0000000e+02   4.3755931e+00   1.3019974e+00   1.1943305e+01
   1.7887810e+01  -2.3076610e+01   2.0000000e+02   4.6279738e+00   1.3957111e+00   1.1633540e+01
   1.7829410e+01  -2.3193438e+01   2.0000000e+02   4.8508785e+00   1.4744585e+00   1.1300202e+01
   1.7774454e+01  -2.3311689e+01   2.0000000e+02   5.0412291e+00   1.5365544e+00   1.0946746e+01
   1.7722991e+01  -2.3431277e+01   2.0000000e+02   5.1975493e+00   1.5804880e+00   1.0577993e+01
   1.7675069e+01  -2.3552112e+01   2.0000000e+02   5.3203571e+00   1.6052748e+00   1.0199414e+01
   1.7630732e+01  -2.3674106e+01   2.0000000e+02   5.4121839e+00   1.6107099e+00   9.8161633e+00
   1.7590022e+01  -2.3797168e+01   2.0000000e+02   5.4771366e+00   1.5974528e+00   9.4321469e+00
   1.7552981e+01  -2.3921205e+01   2.0000000e+02   5.5200823e+00   1.5669224e+00   9.0493154e+00
   1.7519646e+01  -2.4046126e+01   2.0000000e+02   5.5455833e+00   1.5210459e+00   8.6673636e+00
   1.7490053e+01  -2.4171837e+01   2.0000000e+02   5.5568134e+00   1.4618850e+00   8.2839974e+00
   1.7464233e+01  -2.4298243e+01   2.0000000e+02   5.5546934e+00   1.3912556e+00   7.8956880e+00
   1.7442219e+01  -2.4425250e+01   2.0000000e+02   5.5374832e+00   1.3103746e+00   7.4988171e+00
   1.7424038e+01  -2.4552761e+01   2.0000000e+02   5.5009368e+00   1.2197051e+00   7.0909441e+00
   1.7409714e+01  -2.4680680e+01   2.0000000e+02   5.4390496e+00   1.1189408e+00   6.6718809e+00
   1.7399272e+01  -2.4808910e+01   2.0000000e+02   5.3452268e+00   1.0071807e+00   6.2443274e+00
   1.7392729e+01  -2.4937353e+01   2.0000000e+02   5.2135832e+00   8.8329432e-01   5.8138758e+00
   1.7390105e+01  -2.5065911e+01   2.0000000e+02   5.0401076e+00   7.4628949e-01   5.3884480e+00
   1.7391413e+01  -2.5194486e+01   2.0000000e+02   4.8234094e+00   5.9574713e-01   4.9772947e+00
   1.7396664e+01  -2.5322979e+01   2.0000000e+02   4.5649889e+00   4.3210809e-01   4.5898679e+00
   1.7405867e+01  -2.5451290e+01   2.0000000e+02   4.2690542e+00   2.5681663e-01   4.2347836e+00
   1.7419027e+01  -2.5579320e+01   2.0000000e+02   3.9420363e+00   7.2273471e-02   3.9190429e+00
   1.7436148e+01  -2.5706971e+01   2.0000000e+02   3.5920053e+00  -1.1841881e-01   3.6475681e+00
   1.7457228e+01  -2.5834142e+01   2.0000000e+02   3.2281195e+00  -3.1181776e-01   3.4229740e+00
   1.7482265e+01  -2.5960734e+01   2.0000000e+02   2.8601333e+00  -5.0461197e-01   3.2454526e+00
   1.7511251e+01  -2.6086648e+01   2.0000000e+02   2.4979440e+00  -6.9399622e-01   3.1127097e+00
   1.7544176e+01  -2.6211786e+01   2.0000000e+02   2.1510875e+00  -8.7795777e-01   3.0199416e+00
   1.7581028e+01  -2.6336047e+01   2.0000000e+02   1.8281329e+00  -1.0553649e+00   2.9599184e+00
   1.7621791e+01  -2.6459334e+01   2.0000000e+02   1.5359445e+00  -1.2258738e+00   2.9232670e+00
   1.7666444e+01  -2.6581549e+01   2.0000000e+02   1.2789678e+00  -1.3897060e+00   2.8990474e+00
   1.7714966e+01  -2.6702594e+01   2.0000000e+02   1.0586297e+00  -1.5474043e+00   2.8756007e+00
   1.7767330e+01  -2.6822373e+01   2.0000000e+02   8.7301782e-01  -1.6995715e+00   2.8415817e+00
[truncated: 3,642,157 more chars]
