# Supplementary material for: A high-resolution lithospheric magnetic field model over southern Africa based on a joint inversion of CHAMP, Swarm, WDMAM, and ground magnetic field data
Source: Copernicus journal article supplement (doi:10.5194/se-9-897-2018), 2018-07-16
Supplement: Supplementary file 1 [file se-9-897-2018-supplement.zip › SupplementaryMaterial/ModelSA250km.txt]

   2.2500005e+01  -2.4999991e+01   2.5000000e+02   2.9347790e+00  -3.2156733e+00  -8.7540354e+00
   2.2566483e+01  -2.5124977e+01   2.5000000e+02   2.2704027e+00  -2.6448583e+00  -9.1899841e+00
   2.2649272e+01  -2.5030796e+01   2.5000000e+02   2.4000754e+00  -2.6898794e+00  -9.0521606e+00
   2.2619593e+01  -2.4913455e+01   2.5000000e+02   2.9216621e+00  -3.1427985e+00  -8.6799075e+00
   2.2500000e+01  -2.4861269e+01   2.5000000e+02   3.4364991e+00  -3.6259119e+00  -8.3025282e+00
   2.2380407e+01  -2.4913455e+01   2.5000000e+02   3.5676356e+00  -3.7798463e+00  -8.2546367e+00
   2.2350728e+01  -2.5030796e+01   2.5000000e+02   3.2154160e+00  -3.5245759e+00  -8.5971533e+00
   2.2433517e+01  -2.5124977e+01   2.5000000e+02   2.6358458e+00  -3.0305982e+00  -9.0142116e+00
   2.2791110e+01  -2.5050403e+01   2.5000000e+02   1.9084884e+00  -2.1846223e+00  -9.2449651e+00
   2.2783469e+01  -2.4922052e+01   2.5000000e+02   2.4158911e+00  -2.6283394e+00  -8.9294508e+00
   2.2711005e+01  -2.4811602e+01   2.5000000e+02   3.0228343e+00  -3.1977127e+00  -8.5072793e+00
   2.2590406e+01  -2.4744279e+01   2.5000000e+02   3.5874116e+00  -3.7352284e+00  -8.0604845e+00
   2.2449214e+01  -2.4735429e+01   2.5000000e+02   3.9907477e+00  -4.1134729e+00  -7.7302528e+00
   2.2319588e+01  -2.4787069e+01   2.5000000e+02   4.1514054e+00  -4.2698934e+00  -7.6448967e+00
   2.2231095e+01  -2.4887431e+01   2.5000000e+02   4.0303941e+00  -4.2005284e+00  -7.8441709e+00
   2.2204049e+01  -2.5013608e+01   2.5000000e+02   3.6451488e+00  -3.9314775e+00  -8.2577735e+00
   2.2244821e+01  -2.5136726e+01   2.5000000e+02   3.0774785e+00  -3.5030539e+00  -8.7454322e+00
   2.2344231e+01  -2.5228534e+01   2.5000000e+02   2.4588669e+00  -2.9811095e+00  -9.1639618e+00
   2.2479512e+01  -2.5267912e+01   2.5000000e+02   1.9369841e+00  -2.4712986e+00  -9.4233637e+00
   2.2619515e+01  -2.5245788e+01   2.5000000e+02   1.6358775e+00  -2.1047429e+00  -9.5055234e+00
   2.2731985e+01  -2.5167260e+01   2.5000000e+02   1.6256494e+00  -1.9941061e+00  -9.4377138e+00
   2.2627648e+01  -2.4622121e+01   2.5000000e+02   3.8695804e+00  -4.0002408e+00  -7.6741662e+00
   2.2485785e+01  -2.4604968e+01   2.5000000e+02   4.2927804e+00  -4.3924415e+00  -7.2794538e+00
   2.2345448e+01  -2.4630489e+01   2.5000000e+02   4.5688233e+00  -4.6300319e+00  -7.0441816e+00
   2.2221716e+01  -2.4695945e+01   2.5000000e+02   4.6703936e+00  -4.7113482e+00  -7.0215508e+00
   2.2127926e+01  -2.4794296e+01   2.5000000e+02   4.5800863e+00  -4.6500677e+00  -7.2186120e+00
   2.2074261e+01  -2.4914949e+01   2.5000000e+02   4.2984378e+00  -4.4629695e+00  -7.5964568e+00
   2.2066638e+01  -2.5044874e+01   2.5000000e+02   3.8496632e+00  -4.1626831e+00  -8.0841185e+00
   2.2106024e+01  -2.5169999e+01   2.5000000e+02   3.2806169e+00  -3.7599824e+00  -8.5980179e+00
   2.2188274e+01  -2.5276731e+01   2.5000000e+02   2.6549646e+00  -3.2737107e+00  -9.0602944e+00
   2.2304526e+01  -2.5353443e+01   2.5000000e+02   2.0450428e+00  -2.7404935e+00  -9.4141599e+00
   2.2442139e+01  -2.5391760e+01   2.5000000e+02   1.5217450e+00  -2.2166493e+00  -9.6337015e+00
   2.2586081e+01  -2.5387492e+01   2.5000000e+02   1.1442099e+00  -1.7707773e+00  -9.7239812e+00
   2.2720608e+01  -2.5341106e+01   2.5000000e+02   9.5288503e-01  -1.4705340e+00  -9.7110322e+00
   2.2831035e+01  -2.5257672e+01   2.5000000e+02   9.6749561e-01  -1.3678150e+00  -9.6252278e+00
   2.2905370e+01  -2.5146297e+01   2.5000000e+02   1.1872525e+00  -1.4862459e+00  -9.4833818e+00
   2.2935626e+01  -2.5019107e+01   2.5000000e+02   1.5892865e+00  -1.8144470e+00  -9.2788505e+00
   2.2918657e+01  -2.4889911e+01   2.5000000e+02   2.1264772e+00  -2.3065736e+00  -8.9898097e+00
   2.2856438e+01  -2.4772694e+01   2.5000000e+02   2.7320585e+00  -2.8901677e+00  -8.6043046e+00
   2.2755800e+01  -2.4680108e+01   2.5000000e+02   3.3338424e+00  -3.4807575e+00  -8.1448195e+00
   2.2005477e+01  -2.4730152e+01   2.5000000e+02   5.0445918e+00  -5.0218284e+00  -6.6155840e+00
   2.1948449e+01  -2.4845263e+01   2.5000000e+02   4.8016487e+00  -4.8616065e+00  -6.9920779e+00
   2.1923356e+01  -2.4969413e+01   2.5000000e+02   4.4312464e+00  -4.6310864e+00  -7.4620773e+00
   2.1931748e+01  -2.5095402e+01   2.5000000e+02   3.9535851e+00  -4.3308082e+00  -7.9774870e+00
   2.1973238e+01  -2.5215904e+01   2.5000000e+02   3.3970108e+00  -3.9602498e+00  -8.4901456e+00
   2.2045499e+01  -2.5323890e+01   2.5000000e+02   2.7958598e+00  -3.5232402e+00  -8.9564252e+00
   2.2144380e+01  -2.5413044e+01   2.5000000e+02   2.1883542e+00  -3.0326119e+00  -9.3418544e+00
   2.2264136e+01  -2.5478137e+01   2.5000000e+02   1.6137964e+00  -2.5120722e+00  -9.6253540e+00
   2.2397759e+01  -2.5515346e+01   2.5000000e+02   1.1089241e+00  -1.9947533e+00  -9.8013113e+00
   2.2537398e+01  -2.5522483e+01   2.5000000e+02   7.0446709e-01  -1.5195241e+00  -9.8783860e+00
   2.2674836e+01  -2.5499126e+01   2.5000000e+02   4.2302401e-01  -1.1263958e+00  -9.8757194e+00
   2.2801990e+01  -2.5446650e+01   2.5000000e+02   2.7870433e-01  -8.5166067e-01  -9.8176526e+00
   2.2911403e+01  -2.5368141e+01   2.5000000e+02   2.7823545e-01  -7.2320669e-01  -9.7272757e+00
   2.2996693e+01  -2.5268206e+01   2.5000000e+02   4.2225116e-01  -7.5674490e-01  -9.6191902e+00
   2.3052932e+01  -2.5152698e+01   2.5000000e+02   7.0501689e-01  -9.5366434e-01  -9.4935263e+00
   2.3076921e+01  -2.5028363e+01   2.5000000e+02   1.1120997e+00  -1.3006584e+00  -9.3348368e+00
   2.3067361e+01  -2.4902443e+01   2.5000000e+02   1.6178568e+00  -1.7706095e+00  -9.1184216e+00
   2.3024906e+01  -2.4782247e+01   2.5000000e+02   2.1861597e+00  -2.3247445e+00  -8.8225158e+00
   2.2952106e+01  -2.4674736e+01   2.5000000e+02   2.7756679e+00  -2.9164807e+00  -8.4408237e+00
   2.2853234e+01  -2.4586117e+01   2.5000000e+02   3.3474844e+00  -3.4972739e+00  -7.9895104e+00
   2.2734035e+01  -2.4521494e+01   2.5000000e+02   3.8708419e+00  -4.0232368e+00  -7.5063523e+00
   2.2601387e+01  -2.4484584e+01   2.5000000e+02   4.3242628e+00  -4.4607557e+00  -7.0435305e+00
   2.2462919e+01  -2.4477508e+01   2.5000000e+02   4.6925416e+00  -4.7895243e+00  -6.6573366e+00
   2.2326579e+01  -2.4500672e+01   2.5000000e+02   4.9623436e+00  -5.0026812e+00  -6.3976373e+00
   2.2200199e+01  -2.4552745e+01   2.5000000e+02   5.1195443e+00  -5.1045046e+00  -6.2990107e+00
   2.2091059e+01  -2.4630734e+01   2.5000000e+02   5.1502058e+00  -5.1063931e+00  -6.3748259e+00
   2.1844868e+01  -2.5273528e+01   2.5000000e+02   3.4332368e+00  -4.1201972e+00  -8.4189524e+00
   2.1916247e+01  -2.5384116e+01   2.5000000e+02   2.8263465e+00  -3.7029411e+00  -8.8982704e+00
   2.2010268e+01  -2.5479941e+01   2.5000000e+02   2.2089112e+00  -3.2307845e+00  -9.3037179e+00
   2.2123330e+01  -2.5557281e+01   2.5000000e+02   1.6083183e+00  -2.7170320e+00  -9.6179656e+00
   2.2251066e+01  -2.5613127e+01   2.5000000e+02   1.0512670e+00  -2.1822997e+00  -9.8336800e+00
   2.2388512e+01  -2.5645302e+01   2.5000000e+02   5.6164028e-01  -1.6525184e+00  -9.9536452e+00
   2.2530311e+01  -2.5652548e+01   2.5000000e+02   1.5881467e-01  -1.1564647e+00  -9.9891948e+00
   2.2670926e+01  -2.5634584e+01   2.5000000e+02  -1.4320503e-01  -7.2336409e-01  -9.9578384e+00
   2.2804870e+01  -2.5592111e+01   2.5000000e+02  -3.3570043e-01  -3.8054254e-01  -9.8806998e+00
   2.2926927e+01  -2.5526786e+01   2.5000000e+02  -4.1431618e-01  -1.5104282e-01  -9.7796198e+00
   2.3032366e+01  -2.5441153e+01   2.5000000e+02  -3.7759190e-01  -5.1474261e-02  -9.6734101e+00
   2.3117126e+01  -2.5338544e+01   2.5000000e+02  -2.2579903e-01  -9.0583830e-02  -9.5733471e+00
   2.3177977e+01  -2.5222939e+01   2.5000000e+02   3.8846844e-02  -2.6877665e-01  -9.4791182e+00
   2.3212635e+01  -2.5098809e+01   2.5000000e+02   4.1014025e-01  -5.7832529e-01  -9.3773232e+00
   2.3219844e+01  -2.4970944e+01   2.5000000e+02   8.7499359e-01  -1.0037349e+00  -9.2442455e+00
   2.3199412e+01  -2.4844261e+01   2.5000000e+02   1.4118970e+00  -1.5221716e+00  -9.0528365e+00
   2.3152206e+01  -2.4723616e+01   2.5000000e+02   1.9923530e+00  -2.1042764e+00  -8.7816193e+00
   2.3080104e+01  -2.4613620e+01   2.5000000e+02   2.5852053e+00  -2.7160309e+00  -8.4221867e+00
   2.2985914e+01  -2.4518468e+01   2.5000000e+02   3.1619264e+00  -3.3218443e+00  -7.9828557e+00
   2.2873265e+01  -2.4441779e+01   2.5000000e+02   3.7005479e+00  -3.8883438e+00  -7.4879722e+00
   2.2746461e+01  -2.4386462e+01   2.5000000e+02   4.1868317e+00  -4.3878856e+00  -6.9739595e+00
   2.2610323e+01  -2.4354616e+01   2.5000000e+02   4.6126232e+00  -4.8008560e+00  -6.4838019e+00
   2.2470010e+01  -2.4347446e+01   2.5000000e+02   4.9725541e+00  -5.1165384e+00  -6.0612027e+00
   2.2330831e+01  -2.4365223e+01   2.5000000e+02   5.2605598e+00  -5.3326543e+00  -5.7452760e+00
   2.2198056e+01  -2.4407274e+01   2.5000000e+02   5.4677253e+00  -5.4540486e+00  -5.5659835e+00
   2.2076722e+01  -2.4472006e+01   2.5000000e+02   5.5824109e+00  -5.4907540e+00  -5.5404729e+00
   2.1971451e+01  -2.4556965e+01   2.5000000e+02   5.5926157e+00  -5.4553845e+00  -5.6709147e+00
   2.1886278e+01  -2.4658924e+01   2.5000000e+02   5.4895450e+00  -5.3600382e+00  -5.9446436e+00
   2.1824496e+01  -2.4774000e+01   2.5000000e+02   5.2707103e+00  -5.2133958e+00  -6.3369494e+00
   2.1788530e+01  -2.4897801e+01   2.5000000e+02   4.9412089e+00  -5.0189687e+00  -6.8156347e+00
   2.1779836e+01  -2.5025590e+01   2.5000000e+02   4.5130381e+00  -4.7751678e+00  -7.3454608e+00
   2.1798831e+01  -2.5152461e+01   2.5000000e+02   4.0034085e+00  -4.4771913e+00  -7.8911329e+00
   2.2206112e+01  -2.5734817e+01   2.5000000e+02   6.1161459e-01  -1.9985831e+00  -9.9465402e+00
   2.2344390e+01  -2.5768576e+01   2.5000000e+02   1.2159988e-01  -1.4549091e+00  -1.0034898e+01
   2.2486994e+01  -2.5781239e+01   2.5000000e+02  -2.9463255e-01  -9.3382412e-01  -1.0046356e+01
   2.2629959e+01  -2.5772455e+01   2.5000000e+02  -6.2702177e-01  -4.5789966e-01  -9.9955754e+00
   2.2769312e+01  -2.5742469e+01   2.5000000e+02  -8.6926129e-01  -4.8810818e-02  -9.9000039e+00
   2.2901183e+01  -2.5692114e+01   2.5000000e+02  -1.0183585e+00   2.7394924e-01  -9.7786461e+00
   2.3021922e+01  -2.5622788e+01   2.5000000e+02  -1.0736992e+00   4.9443699e-01  -9.6505031e+00
   2.3128207e+01  -2.5536414e+01   2.5000000e+02  -1.0357156e+00   6.0138250e-01  -9.5322384e+00
   2.3217130e+01  -2.5435380e+01   2.5000000e+02  -9.0467458e-01   5.8871924e-01  -9.4351047e+00
   2.3286284e+01  -2.5322476e+01   2.5000000e+02  -6.8051987e-01   4.5558149e-01  -9.3617388e+00
   2.3333824e+01  -2.5200810e+01   2.5000000e+02  -3.6413984e-01   2.0585253e-01  -9.3040802e+00
   2.3358512e+01  -2.5073722e+01   2.5000000e+02   4.0139231e-02  -1.5222276e-01  -9.2436771e+00
   2.3359744e+01  -2.4944688e+01   2.5000000e+02   5.2206769e-01  -6.0609999e-01  -9.1549952e+00
   2.3337560e+01  -2.4817228e+01   2.5000000e+02   1.0644336e+00  -1.1387130e+00  -9.0111234e+00
   2.3292633e+01  -2.4694808e+01   2.5000000e+02   1.6443836e+00  -1.7284948e+00  -8.7901722e+00
   2.3226246e+01  -2.4580748e+01   2.5000000e+02   2.2367018e+00  -2.3501159e+00  -8.4804051e+00
   2.3140249e+01  -2.4478131e+01   2.5000000e+02   2.8178209e+00  -2.9762095e+00  -8.0828256e+00
   2.3037005e+01  -2.4389725e+01   2.5000000e+02   3.3690598e+00  -3.5797440e+00  -7.6110690e+00
   2.2919326e+01  -2.4317909e+01   2.5000000e+02   3.8781875e+00  -4.1364972e+00  -7.0892424e+00
   2.2790392e+01  -2.4264612e+01   2.5000000e+02   4.3391062e+00  -4.6270442e+00  -6.5486592e+00
   2.2653675e+01  -2.4231265e+01   2.5000000e+02   4.7499761e+00  -5.0378618e+00  -6.0243182e+00
   2.2512842e+01  -2.4218760e+01   2.5000000e+02   5.1105644e+00  -5.3616092e+00  -5.5515426e+00
   2.2371665e+01  -2.4227433e+01   2.5000000e+02   5.4195075e+00  -5.5966999e+00  -5.1631102e+00
   2.2233924e+01  -2.4257052e+01   2.5000000e+02   5.6723293e+00  -5.7465889e+00  -4.8866865e+00
   2.2103315e+01  -2.4306822e+01   2.5000000e+02   5.8607678e+00  -5.8188920e+00  -4.7424761e+00
   2.1983349e+01  -2.4375409e+01   2.5000000e+02   5.9737104e+00  -5.8242336e+00  -4.7411105e+00
   2.1877268e+01  -2.4460971e+01   2.5000000e+02   5.9994708e+00  -5.7745842e+00  -4.8822903e+00
   2.1787954e+01  -2.4561206e+01   2.5000000e+02   5.9286894e+00  -5.6811411e+00  -5.1548914e+00
   2.1717858e+01  -2.4673412e+01   2.5000000e+02   5.7567740e+00  -5.5522052e+00  -5.5389505e+00
   2.1668928e+01  -2.4794557e+01   2.5000000e+02   5.4850710e+00  -5.3917342e+00  -6.0089541e+00
   2.1642551e+01  -2.4921357e+01   2.5000000e+02   5.1205070e+00  -5.1989789e+00  -6.5372761e+00
   2.1639516e+01  -2.5050367e+01   2.5000000e+02   4.6741679e+00  -4.9692136e+00  -7.0966300e+00
   2.1659977e+01  -2.5178069e+01   2.5000000e+02   4.1598001e+00  -4.6953924e+00  -7.6609783e+00
   2.1703447e+01  -2.5300971e+01   2.5000000e+02   3.5928640e+00  -4.3703874e+00  -8.2055924e+00
   2.1768802e+01  -2.5415702e+01   2.5000000e+02   2.9903554e+00  -3.9895178e+00  -8.7071945e+00
   2.1854304e+01  -2.5519106e+01   2.5000000e+02   2.3709028e+00  -3.5528229e+00  -9.1450317e+00
   2.1957642e+01  -2.5608328e+01   2.5000000e+02   1.7545190e+00  -3.0664384e+00  -9.5028237e+00
   2.2075997e+01  -2.5680903e+01   2.5000000e+02   1.1616082e+00  -2.5426062e+00  -9.7707729e+00
   2.2817160e+01  -2.5862456e+01   2.5000000e+02  -1.4969976e+00   4.7489711e-01  -9.7780075e+00
   2.2950195e+01  -2.5812714e+01   2.5000000e+02  -1.6397967e+00   8.1074562e-01  -9.6236460e+00
   2.3073880e+01  -2.5746332e+01   2.5000000e+02  -1.7042822e+00   1.0573921e+00  -9.4684590e+00
   2.3185665e+01  -2.5664687e+01   2.5000000e+02  -1.6921294e+00   1.2058777e+00  -9.3282434e+00
   2.3283263e+01  -2.5569471e+01   2.5000000e+02  -1.6044339e+00   1.2509666e+00  -9.2158069e+00
   2.3364693e+01  -2.5462651e+01   2.5000000e+02  -1.4408889e+00   1.1909827e+00  -9.1385266e+00
   2.3428322e+01  -2.5346430e+01   2.5000000e+02  -1.2000148e+00   1.0273349e+00  -9.0960055e+00
   2.3472896e+01  -2.5223196e+01   2.5000000e+02  -8.8059302e-01   7.6393917e-01  -9.0787075e+00
   2.3497562e+01  -2.5095476e+01   2.5000000e+02  -4.8400222e-01   4.0693191e-01  -9.0683636e+00
   2.3501877e+01  -2.4965878e+01   2.5000000e+02  -1.6461424e-02  -3.5203128e-02  -9.0405084e+00
   2.3485818e+01  -2.4837042e+01   2.5000000e+02   5.0976403e-01  -5.5107510e-01  -8.9687012e+00
   2.3449774e+01  -2.4711583e+01   2.5000000e+02   1.0769632e+00  -1.1258986e+00  -8.8293782e+00
   2.3394533e+01  -2.4592042e+01   2.5000000e+02   1.6641758e+00  -1.7414466e+00  -8.6060252e+00
   2.3321262e+01  -2.4480829e+01   2.5000000e+02   2.2502828e+00  -2.3767967e+00  -8.2917304e+00
   2.3231482e+01  -2.4380185e+01   2.5000000e+02   2.8169121e+00  -3.0097226e+00  -7.8898921e+00
   2.3127031e+01  -2.4292130e+01   2.5000000e+02   3.3505270e+00  -3.6185407e+00  -7.4133087e+00
   2.3010031e+01  -2.4218429e+01   2.5000000e+02   3.8431859e+00  -4.1838193e+00  -6.8823106e+00
   2.2882839e+01  -2.4160555e+01   2.5000000e+02   4.2921262e+00  -4.6897466e+00  -6.3224277e+00
   2.2748007e+01  -2.4119665e+01   2.5000000e+02   4.6983324e+00  -5.1248575e+00  -5.7621024e+00
   2.2608231e+01  -2.4096575e+01   2.5000000e+02   5.0645646e+00  -5.4822179e+00  -5.2305939e+00
   2.2466298e+01  -2.4091744e+01   2.5000000e+02   5.3932100e+00  -5.7591514e+00  -4.7562209e+00
   2.2325037e+01  -2.4105269e+01   2.5000000e+02   5.6843628e+00  -5.9567453e+00  -4.3649306e+00
   2.2187263e+01  -2.4136881e+01   2.5000000e+02   5.9345604e+00  -6.0794128e+00  -4.0789177e+00
   2.2055726e+01  -2.4185949e+01   2.5000000e+02   6.1364584e+00  -6.1345004e+00  -3.9151340e+00
   2.1933060e+01  -2.4251493e+01   2.5000000e+02   6.2796114e+00  -6.1317352e+00  -3.8836710e+00
   2.1821731e+01  -2.4332204e+01   2.5000000e+02   6.3522456e+00  -6.0822288e+00  -3.9863843e+00
   2.1723990e+01  -2.4426466e+01   2.5000000e+02   6.3435953e+00  -5.9969781e+00  -4.2163964e+00
   2.1641829e+01  -2.4532388e+01   2.5000000e+02   6.2461412e+00  -5.8851427e+00  -4.5590094e+00
   2.1576941e+01  -2.4647842e+01   2.5000000e+02   6.0570905e+00  -5.7526048e+00  -4.9939528e+00
   2.1530681e+01  -2.4770499e+01   2.5000000e+02   5.7787253e+00  -5.6012274e+00  -5.4982466e+00
   2.1504041e+01  -2.4897882e+01   2.5000000e+02   5.4176038e+00  -5.4288752e+00  -6.0488588e+00
   2.1497622e+01  -2.5027408e+01   2.5000000e+02   4.9831873e+00  -5.2301161e+00  -6.6241949e+00
   2.1511616e+01  -2.5156444e+01   2.5000000e+02   4.4864683e+00  -4.9973464e+00  -7.2043921e+00
   2.1545804e+01  -2.5282358e+01   2.5000000e+02   3.9391652e+00  -4.7222374e+00  -7.7707583e+00
   2.1599547e+01  -2.5402574e+01   2.5000000e+02   3.3536316e+00  -4.3974697e+00  -8.3051306e+00
   2.1671799e+01  -2.5514624e+01   2.5000000e+02   2.7431988e+00  -4.0185513e+00  -8.7899460e+00
   2.1761122e+01  -2.5616202e+01   2.5000000e+02   2.1224619e+00  -3.5853616e+00  -9.2092945e+00
   2.1865716e+01  -2.5705211e+01   2.5000000e+02   1.5070961e+00  -3.1029416e+00  -9.5506414e+00
   2.1983447e+01  -2.5779810e+01   2.5000000e+02   9.1309651e-01  -2.5813062e+00  -9.8064581e+00
   2.2111897e+01  -2.5838451e+01   2.5000000e+02   3.5570177e-01  -2.0343965e+00  -9.9750480e+00
   2.2248414e+01  -2.5879917e+01   2.5000000e+02  -1.5160400e-01  -1.4786879e+00  -1.0060280e+01
   2.2390166e+01  -2.5903346e+01   2.5000000e+02  -5.9768764e-01  -9.3196073e-01  -1.0070526e+01
   2.2534204e+01  -2.5908248e+01   2.5000000e+02  -9.7402899e-01  -4.1238947e-01  -1.0017401e+01
   2.2677529e+01  -2.5894523e+01   2.5000000e+02  -1.2748389e+00   6.2176709e-02  -9.9147539e+00
   2.3395327e+01  -2.5648315e+01   2.5000000e+02  -2.1978998e+00   1.8677498e+00  -8.8402345e+00
   2.3476438e+01  -2.5543687e+01   2.5000000e+02  -2.0479512e+00   1.8156480e+00  -8.7698732e+00
   2.3542550e+01  -2.5430832e+01   2.5000000e+02  -1.8366368e+00   1.6768105e+00  -8.7423996e+00
   2.3592694e+01  -2.5311479e+01   2.5000000e+02  -1.5610066e+00   1.4540269e+00  -8.7519211e+00
   2.3626151e+01  -2.5187454e+01   2.5000000e+02  -1.2190040e+00   1.1509206e+00  -8.7852787e+00
   2.3642464e+01  -2.5060648e+01   2.5000000e+02  -8.1145590e-01   7.7198046e-01  -8.8230974e+00
   2.3641438e+01  -2.4932989e+01   2.5000000e+02  -3.4364944e-01   3.2299814e-01  -8.8421805e+00
   2.3623142e+01  -2.4806410e+01   2.5000000e+02   1.7410038e-01  -1.8824602e-01  -8.8187644e+00
   2.3587905e+01  -2.4682823e+01   2.5000000e+02   7.2712605e-01  -7.5135698e-01  -8.7319033e+00
   2.3536306e+01  -2.4564089e+01   2.5000000e+02   1.2981536e+00  -1.3531212e+00  -8.5662401e+00
   2.3469165e+01  -2.4451993e+01   2.5000000e+02   1.8695389e+00  -1.9778543e+00  -8.3136890e+00
   2.3387527e+01  -2.4348212e+01   2.5000000e+02   2.4254672e+00  -2.6083375e+00  -7.9739137e+00
   2.3292645e+01  -2.4254297e+01   2.5000000e+02   2.9535780e+00  -3.2270315e+00  -7.5538324e+00
   2.3185961e+01  -2.4171648e+01   2.5000000e+02   3.4458587e+00  -3.8173664e+00  -7.0664553e+00
   2.3069082e+01  -2.4101496e+01   2.5000000e+02   3.8987437e+00  -4.3648274e+00  -6.5294225e+00
   2.2943759e+01  -2.4044881e+01   2.5000000e+02   4.3125312e+00  -4.8577129e+00  -5.9634801e+00
   2.2811860e+01  -2.4002644e+01   2.5000000e+02   4.6902872e+00  -5.2874919e+00  -5.3911115e+00
   2.2675344e+01  -2.3975411e+01   2.5000000e+02   5.0364548e+00  -5.6488302e+00  -4.8353270e+00
   2.2536233e+01  -2.3963584e+01   2.5000000e+02   5.3553425e+00  -5.9393342e+00  -4.3187039e+00
   2.2396586e+01  -2.3967339e+01   2.5000000e+02   5.6496835e+00  -6.1591659e+00  -3.8626783e+00
   2.2258470e+01  -2.3986621e+01   2.5000000e+02   5.9194845e+00  -6.3107482e+00  -3.4869082e+00
   2.2123927e+01  -2.4021143e+01   2.5000000e+02   6.1613528e+00  -6.3986383e+00  -3.2085224e+00
   2.1994955e+01  -2.4070395e+01   2.5000000e+02   6.3684280e+00  -6.4294627e+00  -3.0411699e+00
   2.1873472e+01  -2.4133646e+01   2.5000000e+02   6.5310695e+00  -6.4117459e+00  -2.9936759e+00
   2.1761292e+01  -2.4209958e+01   2.5000000e+02   6.6381669e+00  -6.3553070e+00  -3.0688227e+00
   2.1660100e+01  -2.4298196e+01   2.5000000e+02   6.6788830e+00  -6.2702123e+00  -3.2626205e+00
   2.1571427e+01  -2.4397046e+01   2.5000000e+02   6.6444404e+00  -6.1654569e+00  -3.5645711e+00
   2.1496626e+01  -2.4505033e+01   2.5000000e+02   6.5295340e+00  -6.0477461e+00  -3.9589900e+00
   2.1436852e+01  -2.4620542e+01   2.5000000e+02   6.3330234e+00  -5.9206960e+00  -4.4271097e+00
   2.1393044e+01  -2.4741841e+01   2.5000000e+02   6.0577838e+00  -5.7845976e+00  -4.9493609e+00
   2.1365907e+01  -2.4867105e+01   2.5000000e+02   5.7098627e+00  -5.6366802e+00  -5.5071865e+00
   2.1355902e+01  -2.4994445e+01   2.5000000e+02   5.2972717e+00  -5.4716749e+00  -6.0840077e+00
   2.1363232e+01  -2.5121935e+01   2.5000000e+02   4.8288775e+00  -5.2825353e+00  -6.6651946e+00
   2.1387842e+01  -2.5247641e+01   2.5000000e+02   4.3136877e+00  -5.0612485e+00  -7.2373864e+00
   2.1429408e+01  -2.5369649e+01   2.5000000e+02   3.7607074e+00  -4.7998298e+00  -7.7875647e+00
   2.1487346e+01  -2.5486095e+01   2.5000000e+02   3.1792137e+00  -4.4914982e+00  -8.3025068e+00
   2.1560817e+01  -2.5595198e+01   2.5000000e+02   2.5791967e+00  -4.1319476e+00  -8.7689253e+00
   2.1648732e+01  -2.5695281e+01   2.5000000e+02   1.9716918e+00  -3.7204609e+00  -9.1743383e+00
   2.1749773e+01  -2.5784802e+01   2.5000000e+02   1.3686346e+00  -3.2604546e+00  -9.5084928e+00
   2.1862409e+01  -2.5862380e+01   2.5000000e+02   7.8230199e-01  -2.7593352e+00  -9.7647077e+00
   2.1984918e+01  -2.5926814e+01   2.5000000e+02   2.2453327e-01  -2.2277397e+00  -9.9406622e+00
   2.2115417e+01  -2.5977106e+01   2.5000000e+02  -2.9402521e-01  -1.6784465e+00  -1.0038406e+01
   2.2251889e+01  -2.6012474e+01   2.5000000e+02  -7.6434658e-01  -1.1253796e+00  -1.0063686e+01
   2.2392219e+01  -2.6032368e+01   2.5000000e+02  -1.1791904e+00  -5.8285239e-01  -1.0024987e+01
   2.2534225e+01  -2.6036480e+01   2.5000000e+02  -1.5330858e+00  -6.5107221e-02  -9.9326363e+00
   2.2675699e+01  -2.6024745e+01   2.5000000e+02  -1.8223231e+00   4.1404075e-01  -9.7982080e+00
   2.2814440e+01  -2.5997346e+01   2.5000000e+02  -2.0450182e+00   8.4158349e-01  -9.6342073e+00
   2.2948295e+01  -2.5954709e+01   2.5000000e+02  -2.2011125e+00   1.2058111e+00  -9.4538986e+00
   2.3075191e+01  -2.5897496e+01   2.5000000e+02  -2.2921131e+00   1.4968327e+00  -9.2710814e+00
   2.3193172e+01  -2.5826595e+01   2.5000000e+02  -2.3204710e+00   1.7070656e+00  -9.0995913e+00
   2.3300428e+01  -2.5743104e+01   2.5000000e+02  -2.2886077e+00   1.8315071e+00  -8.9524003e+00
   2.3766996e+01  -2.5206421e+01   2.5000000e+02  -1.7043448e+00   1.6509560e+00  -8.4168482e+00
   2.3783719e+01  -2.5078890e+01   2.5000000e+02  -1.3103298e+00   1.2824350e+00  -8.5050104e+00
   2.3784834e+01  -2.4950467e+01   2.5000000e+02  -8.5897169e-01   8.5062860e-01  -8.5817661e+00
   2.3770378e+01  -2.4822711e+01   2.5000000e+02  -3.5796699e-01   3.6015918e-01  -8.6242535e+00
   2.3740574e+01  -2.4697168e+01   2.5000000e+02   1.8077677e-01  -1.8222959e-01  -8.6114380e+00
   2.3695825e+01  -2.4575353e+01   2.5000000e+02   7.4241159e-01  -7.6720732e-01  -8.5264591e+00
   2.3636712e+01  -2.4458730e+01   2.5000000e+02   1.3109234e+00  -1.3828647e+00  -8.3581976e+00
   2.3563983e+01  -2.4348698e+01   2.5000000e+02   1.8709892e+00  -2.0152419e+00  -8.1019680e+00
   2.3478542e+01  -2.4246574e+01   2.5000000e+02   2.4095656e+00  -2.6492496e+00  -7.7594060e+00
   2.3381437e+01  -2.4153577e+01   2.5000000e+02   2.9169814e+00  -3.2697497e+00  -7.3377654e+00
   2.3273847e+01  -2.4070813e+01   2.5000000e+02   3.3874569e+00  -3.8625747e+00  -6.8488769e+00
   2.3157070e+01  -2.3999268e+01   2.5000000e+02   3.8190571e+00  -4.4153104e+00  -6.3080244e+00
   2.3032504e+01  -2.3939789e+01   2.5000000e+02   4.2132278e+00  -4.9178680e+00  -5.7328017e+00
   2.2901635e+01  -2.3893081e+01   2.5000000e+02   4.5739378e+00  -5.3627085e+00  -5.1421595e+00
   2.2766016e+01  -2.3859698e+01   2.5000000e+02   4.9066332e+00  -5.7448548e+00  -4.5555625e+00
   2.2627254e+01  -2.3840034e+01   2.5000000e+02   5.2170503e+00  -6.0616689e+00  -3.9923404e+00
   2.2486990e+01  -2.3834322e+01   2.5000000e+02   5.5100326e+00  -6.3125080e+00  -3.4712509e+00
   2.2346878e+01  -2.3842629e+01   2.5000000e+02   5.7884583e+00  -6.4984190e+00  -3.0101723e+00
   2.2208576e+01  -2.3864856e+01   2.5000000e+02   6.0523751e+00  -6.6219814e+00  -2.6258802e+00
   2.2073717e+01  -2.3900742e+01   2.5000000e+02   6.2985388e+00  -6.6873990e+00  -2.3335691e+00
   2.1943900e+01  -2.3949862e+01   2.5000000e+02   6.5203884e+00  -6.7006766e+00  -2.1460226e+00
   2.1820668e+01  -2.4011634e+01   2.5000000e+02   6.7085879e+00  -6.6696432e+00  -2.0724041e+00
   2.1705490e+01  -2.4085325e+01   2.5000000e+02   6.8520806e+00  -6.6035747e+00  -2.1169496e+00
   2.1599747e+01  -2.4170063e+01   2.5000000e+02   6.9395177e+00  -6.5123367e+00  -2.2780509e+00
   2.1504717e+01  -2.4264838e+01   2.5000000e+02   6.9608355e+00  -6.4052367e+00  -2.5480235e+00
   2.1421556e+01  -2.4368522e+01   2.5000000e+02   6.9086527e+00  -6.2898407e+00  -2.9139260e+00
   2.1351286e+01  -2.4479876e+01   2.5000000e+02   6.7792005e+00  -6.1711123e+00  -3.3591404e+00
   2.1294783e+01  -2.4597569e+01   2.5000000e+02   6.5725821e+00  -6.0510183e+00  -3.8654459e+00
   2.1252763e+01  -2.4720187e+01   2.5000000e+02   6.2923843e+00  -5.9286277e+00  -4.4149306e+00
   2.1225776e+01  -2.4846255e+01   2.5000000e+02   5.9447559e+00  -5.8005175e+00  -4.9914535e+00
   2.1214194e+01  -2.4974252e+01   2.5000000e+02   5.5373082e+00  -5.6613166e+00  -5.5812397e+00
   2.1218203e+01  -2.5102628e+01   2.5000000e+02   5.0781253e+00  -5.5042302e+00  -6.1726967e+00
   2.1237805e+01  -2.5229823e+01   2.5000000e+02   4.5751118e+00  -5.3215240e+00  -6.7556837e+00
   2.1272810e+01  -2.5354289e+01   2.5000000e+02   4.0357886e+00  -5.1050932e+00  -7.3205189e+00
   2.1322835e+01  -2.5474505e+01   2.5000000e+02   3.4675189e+00  -4.8472388e+00  -7.8571235e+00
   2.1387313e+01  -2.5588997e+01   2.5000000e+02   2.8779493e+00  -4.5416500e+00  -8.3546966e+00
   2.1465492e+01  -2.5696358e+01   2.5000000e+02   2.2754648e+00  -4.1844874e+00  -8.8020297e+00
   2.1556443e+01  -2.5795263e+01   2.5000000e+02   1.6694121e+00  -3.7752646e+00  -9.1884606e+00
   2.1659074e+01  -2.5884489e+01   2.5000000e+02   1.0698990e+00  -3.3172280e+00  -9.5051885e+00
   2.1772138e+01  -2.5962932e+01   2.5000000e+02   4.8725177e-01  -2.8171474e+00  -9.7464579e+00
   2.1894251e+01  -2.6029616e+01   2.5000000e+02  -6.8672272e-02  -2.2845897e+00  -9.9102526e+00
   2.2023907e+01  -2.6083711e+01   2.5000000e+02  -5.8911186e-01  -1.7309481e+00  -9.9983224e+00
   2.2159501e+01  -2.6124543e+01   2.5000000e+02  -1.0667249e+00  -1.1685284e+00  -1.0015638e+01
   2.2299346e+01  -2.6151603e+01   2.5000000e+02  -1.4955994e+00  -6.0990831e-01  -9.9695661e+00
   2.2441699e+01  -2.6164552e+01   2.5000000e+02  -1.8711125e+00  -6.7535889e-02  -9.8690731e+00
   2.2584779e+01  -2.6163228e+01   2.5000000e+02  -2.1898199e+00   4.4650088e-01  -9.7241465e+00
   2.2726800e+01  -2.6147648e+01   2.5000000e+02  -2.4495117e+00   9.2073455e-01  -9.5454562e+00
   2.2865988e+01  -2.6118006e+01   2.5000000e+02  -2.6493488e+00   1.3445794e+00  -9.3442199e+00
   2.3000608e+01  -2.6074673e+01   2.5000000e+02  -2.7900119e+00   1.7087059e+00  -9.1321394e+00
   2.3128985e+01  -2.6018190e+01   2.5000000e+02  -2.8735971e+00   2.0053994e+00  -8.9213218e+00
   2.3249532e+01  -2.5949261e+01   2.5000000e+02  -2.9031840e+00   2.2288915e+00  -8.7240293e+00
   2.3360764e+01  -2.5868743e+01   2.5000000e+02  -2.8820232e+00   2.3755093e+00  -8.5521977e+00
   2.3461321e+01  -2.5777637e+01   2.5000000e+02  -2.8125761e+00   2.4436667e+00  -8.4165767e+00
   2.3549984e+01  -2.5677070e+01   2.5000000e+02  -2.6956215e+00   2.4335857e+00  -8.3255509e+00
   2.3625690e+01  -2.5568286e+01   2.5000000e+02  -2.5298280e+00   2.3468422e+00  -8.2837111e+00
   2.3687542e+01  -2.5452625e+01   2.5000000e+02  -2.3119672e+00   2.1857681e+00  -8.2904950e+00
   2.3734822e+01  -2.5331509e+01   2.5000000e+02  -2.0379357e+00   1.9529526e+00  -8.3392045e+00
   2.3875586e+01  -2.4659982e+01   2.5000000e+02  -1.2471225e-01   1.2778743e-01  -8.4111603e+00
   2.3830879e+01  -2.4537575e+01   2.5000000e+02   4.2997581e-01  -4.4984078e-01  -8.3716380e+00
   2.3773097e+01  -2.4419804e+01   2.5000000e+02   9.9112850e-01  -1.0591083e+00  -8.2507803e+00
   2.3702841e+01  -2.4307823e+01   2.5000000e+02   1.5447094e+00  -1.6882208e+00  -8.0432461e+00
   2.3620832e+01  -2.4202727e+01   2.5000000e+02   2.0784559e+00  -2.3240750e+00  -7.7490118e+00
   2.3527895e+01  -2.4105543e+01   2.5000000e+02   2.5828581e+00  -2.9532077e+00  -7.3728536e+00
   2.3424960e+01  -2.4017218e+01   2.5000000e+02   3.0516860e+00  -3.5626617e+00  -6.9235519e+00
   2.3313046e+01  -2.3938609e+01   2.5000000e+02   3.4821542e+00  -4.1407340e+00  -6.4129820e+00
   2.3193253e+01  -2.3870480e+01   2.5000000e+02   3.8746916e+00  -4.6774569e+00  -5.8552510e+00
   2.3066752e+01  -2.3813490e+01   2.5000000e+02   4.2324422e+00  -5.1648996e+00  -5.2658958e+00
   2.2934774e+01  -2.3768190e+01   2.5000000e+02   4.5605438e+00  -5.5972504e+00  -4.6612261e+00
   2.2798599e+01  -2.3735020e+01   2.5000000e+02   4.8652700e+00  -5.9707263e+00  -4.0577933e+00
   2.2659544e+01  -2.3714297e+01   2.5000000e+02   5.1530948e+00  -6.2833513e+00  -3.4719498e+00
   2.2518950e+01  -2.3706224e+01   2.5000000e+02   5.4297395e+00  -6.5346007e+00  -2.9196729e+00
   2.2378173e+01  -2.3710877e+01   2.5000000e+02   5.6992692e+00  -6.7251226e+00  -2.4164585e+00
   2.2238571e+01  -2.3728212e+01   2.5000000e+02   5.9633363e+00  -6.8566000e+00  -1.9773610e+00
   2.2101491e+01  -2.3758062e+01   2.5000000e+02   6.2206478e+00  -6.9318877e+00  -1.6168451e+00
   2.1968257e+01  -2.3800137e+01   2.5000000e+02   6.4667423e+00  -6.9553308e+00  -1.3482976e+00
   2.1840160e+01  -2.3854033e+01   2.5000000e+02   6.6941569e+00  -6.9330488e+00  -1.1831380e+00
   2.1718445e+01  -2.3919227e+01   2.5000000e+02   6.8930170e+00  -6.8729670e+00  -1.1294865e+00
   2.1604300e+01  -2.3995088e+01   2.5000000e+02   7.0520279e+00  -6.7843615e+00  -1.1909127e+00
   2.1498847e+01  -2.4080881e+01   2.5000000e+02   7.1597440e+00  -6.6769780e+00  -1.3655492e+00
   2.1403126e+01  -2.4175771e+01   2.5000000e+02   7.2059451e+00  -6.5599135e+00  -1.6459096e+00
   2.1318092e+01  -2.4278837e+01   2.5000000e+02   7.1828441e+00  -6.4405342e+00  -2.0196670e+00
   2.1244599e+01  -2.4389071e+01   2.5000000e+02   7.0859548e+00  -6.3237305e+00  -2.4710080e+00
   2.1183398e+01  -2.4505397e+01   2.5000000e+02   6.9143905e+00  -6.2115915e+00  -2.9825547e+00
   2.1135123e+01  -2.4626673e+01   2.5000000e+02   6.6706326e+00  -6.1035430e+00  -3.5371142e+00
   2.1100284e+01  -2.4751708e+01   2.5000000e+02   6.3598036e+00  -5.9967666e+00  -4.1191439e+00
   2.1079268e+01  -2.4879269e+01   2.5000000e+02   5.9887061e+00  -5.8867295e+00  -4.7155384e+00
   2.1072323e+01  -2.5008094e+01   2.5000000e+02   5.5648674e+00  -5.7676484e+00  -5.3157090e+00
   2.1079564e+01  -2.5136907e+01   2.5000000e+02   5.0957615e+00  -5.6328030e+00  -5.9111543e+00
   2.1100962e+01  -2.5264425e+01   2.5000000e+02   4.5884006e+00  -5.4747853e+00  -6.4945675e+00
   2.1136349e+01  -2.5389375e+01   2.5000000e+02   4.0492326e+00  -5.2857922e+00  -7.0589138e+00
   2.1185413e+01  -2.5510507e+01   2.5000000e+02   3.4843704e+00  -5.0581435e+00  -7.5965897e+00
   2.1247702e+01  -2.5626604e+01   2.5000000e+02   2.9000249e+00  -4.7850630e+00  -8.0989763e+00
   2.1322627e+01  -2.5736496e+01   2.5000000e+02   2.3029538e+00  -4.4616285e+00  -8.5565509e+00
   2.1409465e+01  -2.5839073e+01   2.5000000e+02   1.7007512e+00  -4.0856670e+00  -8.9595684e+00
   2.1507366e+01  -2.5933295e+01   2.5000000e+02   1.1018307e+00  -3.6583246e+00  -9.2991553e+00
   2.1615363e+01  -2.6018206e+01   2.5000000e+02   5.1503640e-01  -3.1841135e+00  -9.5684994e+00
   2.1732377e+01  -2.6092940e+01   2.5000000e+02  -5.0935953e-02  -2.6704779e+00  -9.7637392e+00
   2.1857230e+01  -2.6156734e+01   2.5000000e+02  -5.8817868e-01  -2.1269882e+00  -9.8843554e+00
   2.1988659e+01  -2.6208937e+01   2.5000000e+02  -1.0899961e+00  -1.5644573e+00  -9.9329936e+00
   2.2125326e+01  -2.6249014e+01   2.5000000e+02  -1.5509901e+00  -9.9422592e-01  -9.9148923e+00
   2.2265835e+01  -2.6276554e+01   2.5000000e+02  -1.9669183e+00  -4.2765863e-01  -9.8371757e+00
   2.2408747e+01  -2.6291274e+01   2.5000000e+02  -2.3344294e+00   1.2413632e-01  -9.7082137e+00
   2.2552596e+01  -2.6293022e+01   2.5000000e+02  -2.6508804e+00   6.5048573e-01  -9.5371610e+00
   2.2695905e+01  -2.6281782e+01   2.5000000e+02  -2.9143581e+00   1.1413344e+00  -9.3336665e+00
   2.2837204e+01  -2.6257668e+01   2.5000000e+02  -3.1238559e+00   1.5874569e+00  -9.1077288e+00
   2.2975043e+01  -2.6220927e+01   2.5000000e+02  -3.2795562e+00   1.9807122e+00  -8.8696187e+00
   2.3108015e+01  -2.6171938e+01   2.5000000e+02  -3.3830200e+00   2.3143286e+00  -8.6298169e+00
   2.3234764e+01  -2.6111201e+01   2.5000000e+02  -3.4370507e+00   2.5830782e+00  -8.3989968e+00
   2.3354006e+01  -2.6039339e+01   2.5000000e+02  -3.4452955e+00   2.7834603e+00  -8.1878541e+00
   2.3464538e+01  -2.5957085e+01   2.5000000e+02  -3.4114668e+00   2.9137096e+00  -8.0068222e+00
   2.3565255e+01  -2.5865276e+01   2.5000000e+02  -3.3384555e+00   2.9737083e+00  -7.8654798e+00
   2.3655157e+01  -2.5764847e+01   2.5000000e+02  -3.2274969e+00   2.9647044e+00  -7.7716949e+00
   2.3733362e+01  -2.5656816e+01   2.5000000e+02  -3.0776456e+00   2.8888689e+00  -7.7305284e+00
   2.3799113e+01  -2.5542275e+01   2.5000000e+02  -2.8857945e+00   2.7487545e+00  -7.7430634e+00
   2.3851784e+01  -2.5422380e+01   2.5000000e+02  -2.6473301e+00   2.5467684e+00  -7.8054137e+00
   2.3890885e+01  -2.5298334e+01   2.5000000e+02  -2.3573506e+00   2.2847956e+00  -7.9082229e+00
   2.3916068e+01  -2.5171383e+01   2.5000000e+02  -2.0122734e+00   1.9641728e+00  -8.0368659e+00
   2.3927125e+01  -2.5042792e+01   2.5000000e+02  -1.6113141e+00   1.5859672e+00  -8.1725506e+00
   2.3923990e+01  -2.4913844e+01   2.5000000e+02  -1.1575896e+00   1.1516758e+00  -8.2940868e+00
   2.3906739e+01  -2.4785818e+01   2.5000000e+02  -6.5839613e-01   6.6403209e-01  -8.3800917e+00
   2.3728573e+01  -2.4121189e+01   2.5000000e+02   1.9382354e+00  -2.2413478e+00  -7.5914651e+00
   2.3635549e+01  -2.4023575e+01   2.5000000e+02   2.4255619e+00  -2.8689922e+00  -7.2344109e+00
   2.3533333e+01  -2.3934023e+01   2.5000000e+02   2.8771786e+00  -3.4795002e+00  -6.8041947e+00
   2.3422770e+01  -2.3853255e+01   2.5000000e+02   3.2905866e+00  -4.0623770e+00  -6.3109039e+00
   2.3304766e+01  -2.3781924e+01   2.5000000e+02   3.6661571e+00  -4.6085877e+00  -5.7664505e+00
   2.3180283e+01  -2.3720604e+01   2.5000000e+02   4.0067815e+00  -5.1107836e+00  -5.1839387e+00
   2.3050332e+01  -2.3669791e+01   2.5000000e+02   4.3173485e+00  -5.5633640e+00  -4.5771746e+00
   2.2915960e+01  -2.3629891e+01   2.5000000e+02   4.6041204e+00  -5.9624611e+00  -3.9601939e+00
   2.2778251e+01  -2.3601225e+01   2.5000000e+02   4.8739863e+00  -6.3057257e+00  -3.3469984e+00
   2.2638311e+01  -2.3584025e+01   2.5000000e+02   5.1337129e+00  -6.5920724e+00  -2.7513309e+00
   2.2497262e+01  -2.3578427e+01   2.5000000e+02   5.3891644e+00  -6.8213651e+00  -2.1866225e+00
   2.2356235e+01  -2.3584476e+01   2.5000000e+02   5.6445807e+00  -6.9941580e+00  -1.6661476e+00
   2.2216360e+01  -2.3602125e+01   2.5000000e+02   5.9019631e+00  -7.1116600e+00  -1.2031923e+00
   2.2078760e+01  -2.3631230e+01   2.5000000e+02   6.1606100e+00  -7.1759679e+00  -8.1106776e-01
   2.1944540e+01  -2.3671560e+01   2.5000000e+02   6.4168981e+00  -7.1904808e+00  -5.0282317e-01
   2.1814781e+01  -2.3722789e+01   2.5000000e+02   6.6643197e+00  -7.1603433e+00  -2.9039751e-01
   2.1690531e+01  -2.3784506e+01   2.5000000e+02   6.8938728e+00  -7.0926096e+00  -1.8344873e-01
   2.1572798e+01  -2.3856215e+01   2.5000000e+02   7.0947727e+00  -6.9959889e+00  -1.8799301e-01
   2.1462542e+01  -2.3937336e+01   2.5000000e+02   7.2554546e+00  -6.8801307e+00  -3.0527232e-01
   2.1360668e+01  -2.4027215e+01   2.5000000e+02   7.3647483e+00  -6.7545887e+00  -5.3124830e-01
   2.1268016e+01  -2.4125126e+01   2.5000000e+02   7.4130520e+00  -6.6277420e+00  -8.5678126e-01
   2.1185358e+01  -2.4230273e+01   2.5000000e+02   7.3933202e+00  -6.5059144e+00  -1.2685602e+00
   2.1113392e+01  -2.4341804e+01   2.5000000e+02   7.3016900e+00  -6.3928516e+00  -1.7506335e+00
   2.1052731e+01  -2.4458811e+01   2.5000000e+02   7.1376607e+00  -6.2896459e+00  -2.2860570e+00
   2.1003903e+01  -2.4580337e+01   2.5000000e+02   6.9037904e+00  -6.1950225e+00  -2.8585134e+00
   2.0967340e+01  -2.4705388e+01   2.5000000e+02   6.6050223e+00  -6.1058474e+00  -3.4535301e+00
   2.0943381e+01  -2.4832937e+01   2.5000000e+02   6.2478273e+00  -6.0176802e+00  -4.0591372e+00
   2.0932261e+01  -2.4961935e+01   2.5000000e+02   5.8393547e+00  -5.9252046e+00  -4.6659548e+00
   2.0934113e+01  -2.5091316e+01   2.5000000e+02   5.3867521e+00  -5.8224636e+00  -5.2668202e+00
   2.0948962e+01  -2.5220008e+01   2.5000000e+02   4.8967162e+00  -5.7029316e+00  -5.8561046e+00
   2.0976725e+01  -2.5346941e+01   2.5000000e+02   4.3753092e+00  -5.5595516e+00  -6.4288712e+00
   2.1017212e+01  -2.5471057e+01   2.5000000e+02   3.8280141e+00  -5.3848999e+00  -6.9800350e+00
   2.1070124e+01  -2.5591318e+01   2.5000000e+02   3.2600077e+00  -5.1716139e+00  -7.5036612e+00
   2.1135052e+01  -2.5706714e+01   2.5000000e+02   2.6765671e+00  -4.9131048e+00  -7.9925989e+00
   2.1211486e+01  -2.5816275e+01   2.5000000e+02   2.0834546e+00  -4.6044178e+00  -8.4386197e+00
   2.1298812e+01  -2.5919076e+01   2.5000000e+02   1.4871990e+00  -4.2430790e+00  -8.8329940e+00
   2.1396318e+01  -2.6014246e+01   2.5000000e+02   8.9507755e-01  -3.8296420e+00  -9.1674745e+00
   2.1503202e+01  -2.6100978e+01   2.5000000e+02   3.1477662e-01  -3.3677800e+00  -9.4353811e+00
   2.1618575e+01  -2.6178534e+01   2.5000000e+02  -2.4613917e-01  -2.8639414e+00  -9.6324647e+00
   2.1741470e+01  -2.6246251e+01   2.5000000e+02  -7.8080802e-01  -2.3266664e+00  -9.7573646e+00
   2.1870849e+01  -2.6303553e+01   2.5000000e+02  -1.2835132e+00  -1.7657914e+00  -9.8115781e+00
   2.2005615e+01  -2.6349947e+01   2.5000000e+02  -1.7497738e+00  -1.1917632e+00  -9.7990699e+00
   2.2144619e+01  -2.6385037e+01   2.5000000e+02  -2.1762253e+00  -6.1513443e-01  -9.7256993e+00
   2.2286673e+01  -2.6408521e+01   2.5000000e+02  -2.5602705e+00  -4.6270385e-02  -9.5986746e+00
   2.2430558e+01  -2.6420198e+01   2.5000000e+02  -2.8997705e+00   5.0483126e-01  -9.4261134e+00
   2.2575040e+01  -2.6419967e+01   2.5000000e+02  -3.1928731e+00   1.0287071e+00  -9.2167355e+00
   2.2718877e+01  -2.6407830e+01   2.5000000e+02  -3.4380671e+00   1.5165999e+00  -8.9796400e+00
   2.2860835e+01  -2.6383891e+01   2.5000000e+02  -3.6344416e+00   1.9606819e+00  -8.7241257e+00
   2.2999697e+01  -2.6348357e+01   2.5000000e+02  -3.7820313e+00   2.3542514e+00  -8.4595517e+00
   2.3134275e+01  -2.6301531e+01   2.5000000e+02  -3.8820770e+00   2.6918834e+00  -8.1952672e+00
   2.3263423e+01  -2.6243816e+01   2.5000000e+02  -3.9371174e+00   2.9695552e+00  -7.9405577e+00
   2.3386045e+01  -2.6175706e+01   2.5000000e+02  -3.9507265e+00   3.1846789e+00  -7.7046586e+00
   2.3501106e+01  -2.6097781e+01   2.5000000e+02  -3.9269723e+00   3.3361048e+00  -7.4966867e+00
   2.3607643e+01  -2.6010708e+01   2.5000000e+02  -3.8696780e+00   3.4240692e+00  -7.3253947e+00
   2.3704769e+01  -2.5915227e+01   2.5000000e+02  -3.7815608e+00   3.4499943e+00  -7.1987657e+00
   2.3791685e+01  -2.5812147e+01   2.5000000e+02  -3.6635411e+00   3.4162054e+00  -7.1232934e+00
   2.3867684e+01  -2.5702342e+01   2.5000000e+02  -3.5143446e+00   3.3255075e+00  -7.1030889e+00
   2.3932155e+01  -2.5586739e+01   2.5000000e+02  -3.3305390e+00   3.1806689e+00  -7.1389297e+00
   2.3984591e+01  -2.5466309e+01   2.5000000e+02  -3.1071188e+00   2.9839381e+00  -7.2273978e+00
   2.4024590e+01  -2.5342065e+01   2.5000000e+02  -2.8385819e+00   2.7367086e+00  -7.3603762e+00
   2.4051855e+01  -2.5215044e+01   2.5000000e+02  -2.5202644e+00   2.4394085e+00  -7.5251391e+00
   2.4066201e+01  -2.5086305e+01   2.5000000e+02  -2.1497520e+00   2.0917896e+00  -7.7050359e+00
   2.4067549e+01  -2.4956919e+01   2.5000000e+02  -1.7279192e+00   1.6934983e+00  -7.8808472e+00
   2.4055928e+01  -2.4827958e+01   2.5000000e+02  -1.2594099e+00   1.2448774e+00  -8.0324986e+00
   2.4031475e+01  -2.4700486e+01   2.5000000e+02  -7.5245360e-01   7.4779992e-01  -8.1408528e+00
   2.3994430e+01  -2.4575552e+01   2.5000000e+02  -2.1810058e-01   2.0631301e-01  -8.1892933e+00
   2.3945134e+01  -2.4454183e+01   2.5000000e+02   3.3089278e-01  -3.7305702e-01  -8.1648851e+00
   2.3884024e+01  -2.4337372e+01   2.5000000e+02   8.8132375e-01  -9.8144657e-01  -8.0590512e+00
   2.3811632e+01  -2.4226071e+01   2.5000000e+02   1.4207010e+00  -1.6081446e+00  -7.8677799e+00
   2.3375689e+01  -2.3671439e+01   2.5000000e+02   3.5557993e+00  -4.7046052e+00  -5.4996354e+00
   2.3252789e+01  -2.3610399e+01   2.5000000e+02   3.8637848e+00  -5.1964507e+00  -4.9270579e+00
   2.3124911e+01  -2.3558757e+01   2.5000000e+02   4.1433278e+00  -5.6435255e+00  -4.3280831e+00
   2.2992907e+01  -2.3516857e+01   2.5000000e+02   4.4004522e+00  -6.0425230e+00  -3.7142459e+00
   2.2857652e+01  -2.3484975e+01   2.5000000e+02   4.6418922e+00  -6.3913520e+00  -3.0969827e+00
   2.2720038e+01  -2.3463321e+01   2.5000000e+02   4.8745093e+00  -6.6889053e+00  -2.4874997e+00
   2.2580974e+01  -2.3452037e+01   2.5000000e+02   5.1046808e+00  -6.9347705e+00  -1.8967732e+00
   2.2441376e+01  -2.3451200e+01   2.5000000e+02   5.3377297e+00  -7.1289708e+00  -1.3356932e+00
   2.2302165e+01  -2.3460813e+01   2.5000000e+02   5.5773739e+00  -7.2718415e+00  -8.1529976e-01
   2.2164258e+01  -2.3480814e+01   2.5000000e+02   5.8252934e+00  -7.3641108e+00  -3.4707817e-01
   2.2028563e+01  -2.3511070e+01   2.5000000e+02   6.0807875e+00  -7.4072503e+00   5.6989849e-02
   2.1895979e+01  -2.3551382e+01   2.5000000e+02   6.3405921e+00  -7.4039647e+00   3.8466799e-01
   2.1767383e+01  -2.3601484e+01   2.5000000e+02   6.5989041e+00  -7.3586689e+00   6.2424809e-01
   2.1643629e+01  -2.3661045e+01   2.5000000e+02   6.8476277e+00  -7.2776999e+00   7.6565036e-01
   2.1525543e+01  -2.3729670e+01   2.5000000e+02   7.0768832e+00  -7.1691319e+00   8.0170150e-01
   2.1413916e+01  -2.3806904e+01   2.5000000e+02   7.2757595e+00  -7.0421658e+00   7.2925006e-01
   2.1309500e+01  -2.3892235e+01   2.5000000e+02   7.4332326e+00  -6.9062241e+00   5.4984165e-01
   2.1213003e+01  -2.3985096e+01   2.5000000e+02   7.5391508e+00  -6.7699542e+00   2.6980413e-01
   2.1125086e+01  -2.4084868e+01   2.5000000e+02   7.5851540e+00  -6.6403557e+00  -1.0030448e-01
   2.1046355e+01  -2.4190885e+01   2.5000000e+02   7.5653974e+00  -6.5221852e+00  -5.4676123e-01
   2.0977359e+01  -2.4302438e+01   2.5000000e+02   7.4769511e+00  -6.4177283e+00  -1.0540734e+00
   2.0918587e+01  -2.4418778e+01   2.5000000e+02   7.3198294e+00  -6.3269241e+00  -1.6064293e+00
   2.0870461e+01  -2.4539125e+01   2.5000000e+02   7.0966510e+00  -6.2477608e+00  -2.1889957e+00
   2.0833338e+01  -2.4662665e+01   2.5000000e+02   6.8120524e+00  -6.1768220e+00  -2.7888046e+00
   2.0807500e+01  -2.4788566e+01   2.5000000e+02   6.4719530e+00  -6.1098106e+00  -3.3952685e+00
   2.0793157e+01  -2.4915972e+01   2.5000000e+02   6.0828958e+00  -6.0419478e+00  -4.0001800e+00
   2.0790442e+01  -2.5044017e+01   2.5000000e+02   5.6514752e+00  -5.9681521e+00  -4.5974710e+00
   2.0799410e+01  -2.5171828e+01   2.5000000e+02   5.1839623e+00  -5.8830306e+00  -5.1827044e+00
   2.0820036e+01  -2.5298531e+01   2.5000000e+02   4.6860894e+00  -5.7807652e+00  -5.7524503e+00
   2.0852214e+01  -2.5423255e+01   2.5000000e+02   4.1629968e+00  -5.6550338e+00  -6.3035973e+00
   2.0895760e+01  -2.5545142e+01   2.5000000e+02   3.6193006e+00  -5.4990950e+00  -6.8327037e+00
   2.0950406e+01  -2.5663350e+01   2.5000000e+02   3.0593341e+00  -5.3061469e+00  -7.3354027e+00
   2.1015807e+01  -2.5777060e+01   2.5000000e+02   2.4874664e+00  -5.0699275e+00  -7.8061068e+00
   2.1091539e+01  -2.5885481e+01   2.5000000e+02   1.9084536e+00  -4.7854869e+00  -8.2380380e+00
   2.1177102e+01  -2.5987858e+01   2.5000000e+02   1.3276720e+00  -4.4499321e+00  -8.6236861e+00
   2.1271924e+01  -2.6083476e+01   2.5000000e+02   7.5115478e-01  -4.0629576e+00  -8.9555850e+00
   2.1375364e+01  -2.6171663e+01   2.5000000e+02   1.8537372e-01  -3.6270270e+00  -9.2272274e+00
   2.1486712e+01  -2.6251800e+01   2.5000000e+02  -3.6322110e-01  -3.1471679e+00  -9.4338764e+00
   2.1605202e+01  -2.6323323e+01   2.5000000e+02  -8.8872186e-01  -2.6304396e+00  -9.5730941e+00
   2.1730011e+01  -2.6385727e+01   2.5000000e+02  -1.3861814e+00  -2.0853023e+00  -9.6448645e+00
   2.1860266e+01  -2.6438570e+01   2.5000000e+02  -1.8518198e+00  -1.5209944e+00  -9.6514081e+00
   2.1995052e+01  -2.6481479e+01   2.5000000e+02  -2.2829736e+00  -9.4704104e-01  -9.5967995e+00
   2.2133419e+01  -2.6514149e+01   2.5000000e+02  -2.6778003e+00  -3.7294584e-01  -9.4865514e+00
   2.2274388e+01  -2.6536348e+01   2.5000000e+02  -3.0349149e+00   1.9200491e-01  -9.3272548e+00
   2.2416960e+01  -2.6547918e+01   2.5000000e+02  -3.3530617e+00   7.3889530e-01  -9.1263102e+00
   2.2560121e+01  -2.6548777e+01   2.5000000e+02  -3.6309404e+00   1.2593364e+00  -8.8917172e+00
   2.2702855e+01  -2.6538919e+01   2.5000000e+02  -3.8672510e+00   1.7456818e+00  -8.6318664e+00
   2.2844148e+01  -2.6518414e+01   2.5000000e+02  -4.0609177e+00   2.1912187e+00  -8.3553231e+00
   2.2982999e+01  -2.6487408e+01   2.5000000e+02  -4.2114457e+00   2.5903458e+00  -8.0705979e+00
   2.3118424e+01  -2.6446121e+01   2.5000000e+02  -4.3192612e+00   2.9386512e+00  -7.7859855e+00
   2.3249467e+01  -2.6394845e+01   2.5000000e+02  -4.3859436e+00   3.2329414e+00  -7.5094750e+00
   2.3375208e+01  -2.6333945e+01   2.5000000e+02  -4.4142436e+00   3.4712178e+00  -7.2487506e+00
   2.3494767e+01  -2.6263850e+01   2.5000000e+02  -4.4078058e+00   3.6526051e+00  -7.0112923e+00
   2.3607312e+01  -2.6185057e+01   2.5000000e+02  -4.3707014e+00   3.7773122e+00  -6.8043924e+00
   2.3712068e+01  -2.6098119e+01   2.5000000e+02  -4.3067565e+00   3.8465427e+00  -6.6351009e+00
   2.3808315e+01  -2.6003648e+01   2.5000000e+02  -4.2188614e+00   3.8623563e+00  -6.5099867e+00
   2.3895402e+01  -2.5902307e+01   2.5000000e+02  -4.1083607e+00   3.8274598e+00  -6.4346589e+00
   2.3972745e+01  -2.5794804e+01   2.5000000e+02  -3.9746367e+00   3.7448652e+00  -6.4131610e+00
   2.4039831e+01  -2.5681889e+01   2.5000000e+02  -3.8150312e+00   3.6174866e+00  -6.4472187e+00
   2.4096225e+01  -2.5564347e+01   2.5000000e+02  -3.6251531e+00   3.4477073e+00  -6.5354939e+00
   2.4141569e+01  -2.5442993e+01   2.5000000e+02  -3.3995704e+00   3.2370013e+00  -6.6730319e+00
   2.4175583e+01  -2.5318666e+01   2.5000000e+02  -3.1328163e+00   2.9857230e+00  -6.8510271e+00
   2.4198068e+01  -2.5192222e+01   2.5000000e+02  -2.8205415e+00   2.6931511e+00  -7.0570302e+00
   2.4208907e+01  -2.5064529e+01   2.5000000e+02  -2.4605815e+00   2.3578263e+00  -7.2756418e+00
   2.4208062e+01  -2.4936463e+01   2.5000000e+02  -2.0537033e+00   1.9781482e+00  -7.4896245e+00
   2.4195575e+01  -2.4808896e+01   2.5000000e+02  -1.6038704e+00   1.5531143e+00  -7.6812379e+00
   2.4171566e+01  -2.4682697e+01   2.5000000e+02  -1.1180481e+00   1.0830956e+00  -7.8335651e+00
   2.4136234e+01  -2.4558721e+01   2.5000000e+02  -6.0558493e-01   5.7042660e-01  -7.9316669e+00
   2.4089849e+01  -2.4437808e+01   2.5000000e+02  -7.7366052e-02   1.9710511e-02  -7.9634543e+00
   2.4032755e+01  -2.4320772e+01   2.5000000e+02   4.5510906e-01  -5.6222652e-01  -7.9202177e+00
   2.3965366e+01  -2.4208401e+01   2.5000000e+02   9.8059693e-01  -1.1666888e+00  -7.7968782e+00
   2.3888159e+01  -2.4101448e+01   2.5000000e+02   1.4889182e+00  -1.7837378e+00  -7.5919646e+00
   2.3801674e+01  -2.4000630e+01   2.5000000e+02   1.9715795e+00  -2.4028689e+00  -7.3073595e+00
   2.3706508e+01  -2.3906619e+01   2.5000000e+02   2.4222599e+00  -3.0137036e+00  -6.9478483e+00
   2.3603315e+01  -2.3820042e+01   2.5000000e+02   2.8370570e+00  -3.6065087e+00  -6.5205775e+00
   2.3492793e+01  -2.3741475e+01   2.5000000e+02   3.2145802e+00  -4.1726130e+00  -6.0344568e+00
   2.2885146e+01  -2.3358892e+01   2.5000000e+02   4.4629406e+00  -6.5812553e+00  -2.6473327e+00
   2.2747192e+01  -2.3336925e+01   2.5000000e+02   4.6677172e+00  -6.8727070e+00  -2.0274025e+00
   2.2607843e+01  -2.3324592e+01   2.5000000e+02   4.8729055e+00  -7.1161046e+00  -1.4204606e+00
   2.2467885e+01  -2.3321961e+01   2.5000000e+02   5.0842092e+00  -7.3112341e+00  -8.3566128e-01
   2.2328108e+01  -2.3329048e+01   2.5000000e+02   5.3060005e+00  -7.4579411e+00  -2.8246305e-01
   2.2189302e+01  -2.3345813e+01   2.5000000e+02   5.5409202e+00  -7.5562045e+00   2.2901893e-01
   2.2052250e+01  -2.3372160e+01   2.5000000e+02   5.7895634e+00  -7.6064603e+00   6.8777839e-01
   2.1917727e+01  -2.3407942e+01   2.5000000e+02   6.0502604e+00  -7.6101154e+00   1.0819402e+00
   2.1786497e+01  -2.3452954e+01   2.5000000e+02   6.3189586e+00  -7.5701313e+00   1.3992881e+00
   2.1659305e+01  -2.3506944e+01   2.5000000e+02   6.5893103e+00  -7.4914217e+00   1.6281600e+00
   2.1536875e+01  -2.3569604e+01   2.5000000e+02   6.8529091e+00  -7.3809310e+00   1.7587138e+00
   2.1419911e+01  -2.3640580e+01   2.5000000e+02   7.0997783e+00  -7.2472655e+00   1.7841126e+00
   2.1309083e+01  -2.3719467e+01   2.5000000e+02   7.3190483e+00  -7.0999664e+00   1.7016129e+00
   2.1205035e+01  -2.3805818e+01   2.5000000e+02   7.4997732e+00  -6.9485584e+00   1.5130169e+00
   2.1108372e+01  -2.3899139e+01   2.5000000e+02   7.6318109e+00  -6.8015920e+00   1.2247361e+00
   2.1019662e+01  -2.3998898e+01   2.5000000e+02   7.7066508e+00  -6.6658450e+00   8.4715789e-01
   2.0939431e+01  -2.4104524e+01   2.5000000e+02   7.7180777e+00  -6.5458171e+00   3.9366811e-01
   2.0868161e+01  -2.4215411e+01   2.5000000e+02   7.6625764e+00  -6.4435592e+00  -1.2063462e-01
   2.0806283e+01  -2.4330923e+01   2.5000000e+02   7.5394091e+00  -6.3588233e+00  -6.8027486e-01
   2.0754180e+01  -2.4450392e+01   2.5000000e+02   7.3503729e+00  -6.2894770e+00  -1.2705768e+00
   2.0712181e+01  -2.4573129e+01   2.5000000e+02   7.0992913e+00  -6.2320521e+00  -1.8785865e+00
   2.0680558e+01  -2.4698422e+01   2.5000000e+02   6.7913965e+00  -6.1823168e+00  -2.4935267e+00
   2.0659528e+01  -2.4825544e+01   2.5000000e+02   6.4327015e+00  -6.1357306e+00  -3.1069540e+00
   2.0649244e+01  -2.4953753e+01   2.5000000e+02   6.0295061e+00  -6.0877063e+00  -3.7125478e+00
   2.0649800e+01  -2.5082300e+01   2.5000000e+02   5.5880178e+00  -6.0336455e+00  -4.3058160e+00
   2.0661227e+01  -2.5210431e+01   2.5000000e+02   5.1141190e+00  -5.9687973e+00  -4.8836460e+00
   2.0683492e+01  -2.5337393e+01   2.5000000e+02   4.6132126e+00  -5.8880357e+00  -5.4438257e+00
   2.0716498e+01  -2.5462436e+01   2.5000000e+02   4.0901600e+00  -5.7856837e+00  -5.9844903e+00
   2.0760083e+01  -2.5584819e+01   2.5000000e+02   3.5492987e+00  -5.6555054e+00  -6.5035441e+00
   2.0814019e+01  -2.5703817e+01   2.5000000e+02   2.9945718e+00  -5.4909480e+00  -6.9981081e+00
   2.0878018e+01  -2.5818719e+01   2.5000000e+02   2.4298067e+00  -5.2856433e+00  -7.4641132e+00
   2.0951725e+01  -2.5928839e+01   2.5000000e+02   1.8590123e+00  -5.0341078e+00  -7.8961660e+00
   2.1034725e+01  -2.6033518e+01   2.5000000e+02   1.2866693e+00  -4.7324745e+00  -8.2877954e+00
   2.1126546e+01  -2.6132125e+01   2.5000000e+02   7.1787767e-01  -4.3790977e+00  -8.6320350e+00
   2.1226655e+01  -2.6224067e+01   2.5000000e+02   1.5824035e-01  -3.9748837e+00  -8.9222134e+00
   2.1334468e+01  -2.6308787e+01   2.5000000e+02  -3.8644666e-01  -3.5232530e+00  -9.1527855e+00
   2.1449347e+01  -2.6385773e+01   2.5000000e+02  -9.1068615e-01  -3.0298050e+00  -9.3199499e+00
   2.1570610e+01  -2.6454557e+01   2.5000000e+02  -1.4097434e+00  -2.5017705e+00  -9.4219835e+00
   2.1697530e+01  -2.6514720e+01   2.5000000e+02  -1.8799738e+00  -1.9474461e+00  -9.4592387e+00
   2.1829343e+01  -2.6565895e+01   2.5000000e+02  -2.3189163e+00  -1.3756885e+00  -9.4339307e+00
   2.1965251e+01  -2.6607770e+01   2.5000000e+02  -2.7251297e+00  -7.9556536e-01  -9.3498244e+00
   2.2104427e+01  -2.6640090e+01   2.5000000e+02  -3.0978525e+00  -2.1613119e-01  -9.2119457e+00
   2.2246024e+01  -2.6662655e+01   2.5000000e+02  -3.4365916e+00   3.5373557e-01  -9.0263723e+00
   2.2389175e+01  -2.6675328e+01   2.5000000e+02  -3.7407859e+00   9.0548079e-01  -8.8000632e+00
   2.2533005e+01  -2.6678032e+01   2.5000000e+02  -4.0095984e+00   1.4310880e+00  -8.5407125e+00
   2.2676632e+01  -2.6670749e+01   2.5000000e+02  -4.2418958e+00   1.9232979e+00  -8.2565619e+00
   2.2819178e+01  -2.6653524e+01   2.5000000e+02  -4.4364585e+00   2.3758741e+00  -7.9561076e+00
   2.2959771e+01  -2.6626464e+01   2.5000000e+02  -4.5923047e+00   2.7837647e+00  -7.6477913e+00
   2.3097552e+01  -2.6589733e+01   2.5000000e+02  -4.7090703e+00   3.1431705e+00  -7.3397201e+00
   2.3231682e+01  -2.6543556e+01   2.5000000e+02  -4.7873628e+00   3.4515201e+00  -7.0394497e+00
   2.3361348e+01  -2.6488215e+01   2.5000000e+02  -4.8289387e+00   3.7073526e+00  -6.7539409e+00
   2.3485766e+01  -2.6424049e+01   2.5000000e+02  -4.8366711e+00   3.9101834e+00  -6.4896462e+00
   2.3604188e+01  -2.6351448e+01   2.5000000e+02  -4.8142764e+00   4.0603938e+00  -6.2526739e+00
   2.3715908e+01  -2.6270853e+01   2.5000000e+02  -4.7658571e+00   4.1591613e+00  -6.0489137e+00
   2.3820262e+01  -2.6182753e+01   2.5000000e+02  -4.6953033e+00   4.2083860e+00  -5.8840958e+00
   2.3916638e+01  -2.6087682e+01   2.5000000e+02  -4.6056771e+00   4.2106125e+00  -5.7636410e+00
   2.4004476e+01  -2.5986214e+01   2.5000000e+02  -4.4986465e+00   4.1688595e+00  -5.6923739e+00
   2.4083268e+01  -2.5878959e+01   2.5000000e+02  -4.3740865e+00   4.0863619e+00  -5.6740574e+00
   2.4152569e+01  -2.5766561e+01   2.5000000e+02  -4.2299467e+00   3.9662418e+00  -5.7107492e+00
   2.4211992e+01  -2.5649693e+01   2.5000000e+02  -4.0623936e+00   3.8110980e+00  -5.8022044e+00
   2.4261212e+01  -2.5529053e+01   2.5000000e+02  -3.8662939e+00   3.6226269e+00  -5.9453084e+00
   2.4299968e+01  -2.5405359e+01   2.5000000e+02  -3.6359850e+00   3.4013419e+00  -6.1337222e+00
   2.4328063e+01  -2.5279343e+01   2.5000000e+02  -3.3662265e+00   3.1464772e+00  -6.3578528e+00
   2.4345364e+01  -2.5151752e+01   2.5000000e+02  -3.0531957e+00   2.8561605e+00  -6.6051829e+00
   2.4351805e+01  -2.5023336e+01   2.5000000e+02  -2.6952921e+00   2.5278233e+00  -6.8609886e+00
   2.4347380e+01  -2.4894850e+01   2.5000000e+02  -2.2936326e+00   2.1588433e+00  -7.1093218e+00
   2.4332151e+01  -2.4767047e+01   2.5000000e+02  -1.8521585e+00   1.7473005e+00  -7.3340667e+00
   2.4306238e+01  -2.4640673e+01   2.5000000e+02  -1.3773312e+00   1.2926748e+00  -7.5199944e+00
   2.4269825e+01  -2.4516463e+01   2.5000000e+02  -8.7760982e-01   7.9640567e-01  -7.6535893e+00
   2.4223154e+01  -2.4395138e+01   2.5000000e+02  -3.6276734e-01   2.6215777e-01  -7.7237008e+00
   2.4166523e+01  -2.4277400e+01   2.5000000e+02   1.5681850e-01  -3.0423205e-01  -7.7219750e+00
   2.4100285e+01  -2.4163929e+01   2.5000000e+02   6.7084168e-01  -8.9508993e-01  -7.6430958e+00
   2.4024848e+01  -2.4055378e+01   2.5000000e+02   1.1696994e+00  -1.5014528e+00  -7.4848435e+00
   2.3940665e+01  -2.3952370e+01   2.5000000e+02   1.6450800e+00  -2.1137352e+00  -7.2479678e+00
   2.3848239e+01  -2.3855496e+01   2.5000000e+02   2.0903983e+00  -2.7223256e+00  -6.9358704e+00
   2.3748115e+01  -2.3765309e+01   2.5000000e+02   2.5011343e+00  -3.3181268e+00  -6.5541462e+00
   2.3640879e+01  -2.3682323e+01   2.5000000e+02   2.8749715e+00  -3.8929059e+00  -6.1100706e+00
   2.3527155e+01  -2.3607013e+01   2.5000000e+02   3.2117821e+00  -4.4394997e+00  -5.6121156e+00
   2.3407598e+01  -2.3539804e+01   2.5000000e+02   3.5134911e+00  -4.9519433e+00  -5.0694930e+00
   2.3282895e+01  -2.3481081e+01   2.5000000e+02   3.7838054e+00  -5.4254408e+00  -4.4918797e+00
   2.3153759e+01  -2.3431174e+01   2.5000000e+02   4.0278931e+00  -5.8563709e+00  -3.8891153e+00
   2.3020924e+01  -2.3390368e+01   2.5000000e+02   4.2519908e+00  -6.2421808e+00  -3.2710429e+00
   2.2313461e+01  -2.3201601e+01   2.5000000e+02   5.0473668e+00  -7.6581771e+00   3.5716998e-01
   2.2174341e+01  -2.3218180e+01   2.5000000e+02   5.2693090e+00  -7.7487139e+00   8.9406331e-01
   2.2036814e+01  -2.3243714e+01   2.5000000e+02   5.5096060e+00  -7.7925689e+00   1.3860224e+00
   2.1901552e+01  -2.3278077e+01   2.5000000e+02   5.7673437e+00  -7.7903244e+00   1.8216050e+00
   2.1769220e+01  -2.3321100e+01   2.5000000e+02   6.0394683e+00  -7.7440727e+00   2.1885123e+00
   2.1640468e+01  -2.3372575e+01   2.5000000e+02   6.3207777e+00  -7.6578992e+00   2.4744224e+00
   2.1515932e+01  -2.3432246e+01   2.5000000e+02   6.6040159e+00  -7.5380619e+00   2.6681773e+00
   2.1396230e+01  -2.3499823e+01   2.5000000e+02   6.8802096e+00  -7.3927340e+00   2.7609733e+00
   2.1281956e+01  -2.3574971e+01   2.5000000e+02   7.1391313e+00  -7.2313863e+00   2.7475446e+00
   2.1173683e+01  -2.3657321e+01   2.5000000e+02   7.3699624e+00  -7.0638951e+00   2.6268179e+00
   2.1071957e+01  -2.3746467e+01   2.5000000e+02   7.5620403e+00  -6.8995873e+00   2.4022012e+00
   2.0977292e+01  -2.3841967e+01   2.5000000e+02   7.7056424e+00  -6.7463812e+00   2.0813401e+00
   2.0890172e+01  -2.3943350e+01   2.5000000e+02   7.7927079e+00  -6.6101564e+00   1.6753655e+00
   2.0811049e+01  -2.4050112e+01   2.5000000e+02   7.8173991e+00  -6.4944219e+00   1.1979078e+00
   2.0740335e+01  -2.4161722e+01   2.5000000e+02   7.7764337e+00  -6.4002787e+00   6.6388847e-01
   2.0678403e+01  -2.4277624e+01   2.5000000e+02   7.6691155e+00  -6.3266709e+00   8.8306180e-02
   2.0625589e+01  -2.4397238e+01   2.5000000e+02   7.4970810e+00  -6.2708459e+00  -5.1480619e-01
   2.0582181e+01  -2.4519965e+01   2.5000000e+02   7.2638284e+00  -6.2289200e+00  -1.1331091e+00
   2.0548425e+01  -2.4645188e+01   2.5000000e+02   6.9741478e+00  -6.1964567e+00  -1.7563545e+00
   2.0524521e+01  -2.4772277e+01   2.5000000e+02   6.6335766e+00  -6.1689277e+00  -2.3764495e+00
   2.0510619e+01  -2.4900589e+01   2.5000000e+02   6.2479838e+00  -6.1419923e+00  -2.9872635e+00
   2.0506821e+01  -2.5029474e+01   2.5000000e+02   5.8232763e+00  -6.1115569e+00  -3.5843812e+00
   2.0513178e+01  -2.5158276e+01   2.5000000e+02   5.3652231e+00  -6.0736422e+00  -4.1647856e+00
   2.0529689e+01  -2.5286339e+01   2.5000000e+02   4.8793109e+00  -6.0241235e+00  -4.7265611e+00
   2.0556303e+01  -2.5413007e+01   2.5000000e+02   4.3706335e+00  -5.9584447e+00  -5.2685373e+00
   2.0592913e+01  -2.5537629e+01   2.5000000e+02   3.8437918e+00  -5.8714206e+00  -5.7898430e+00
   2.0639364e+01  -2.5659565e+01   2.5000000e+02   3.3028498e+00  -5.7572107e+00  -6.2894232e+00
   2.0695445e+01  -2.5778184e+01   2.5000000e+02   2.7514458e+00  -5.6095530e+00  -6.7654577e+00
   2.0760893e+01  -2.5892871e+01   2.5000000e+02   2.1929909e+00  -5.4222327e+00  -7.2149530e+00
   2.0835398e+01  -2.6003030e+01   2.5000000e+02   1.6309673e+00  -5.1897257e+00  -7.6335623e+00
   2.0918594e+01  -2.6108086e+01   2.5000000e+02   1.0692367e+00  -4.9079161e+00  -8.0156898e+00
   2.1010072e+01  -2.6207491e+01   2.5000000e+02   5.1219325e-01  -4.5746641e+00  -8.3550084e+00
   2.1109371e+01  -2.6300723e+01   2.5000000e+02  -3.5241052e-02  -4.1901771e+00  -8.6451273e+00
   2.1215991e+01  -2.6387291e+01   2.5000000e+02  -5.6790077e-01  -3.7570126e+00  -8.8803875e+00
   2.1329383e+01  -2.6466740e+01   2.5000000e+02  -1.0808005e+00  -3.2798456e+00  -9.0564540e+00
   2.1448965e+01  -2.6538649e+01   2.5000000e+02  -1.5696010e+00  -2.7649871e+00  -9.1707188e+00
   2.1574114e+01  -2.6602638e+01   2.5000000e+02  -2.0309822e+00  -2.2199019e+00  -9.2223644e+00
   2.1704176e+01  -2.6658366e+01   2.5000000e+02  -2.4627980e+00  -1.6527483e+00  -9.2122615e+00
   2.1838468e+01  -2.6705539e+01   2.5000000e+02  -2.8640238e+00  -1.0720436e+00  -9.1427408e+00
   2.1976280e+01  -2.6743904e+01   2.5000000e+02  -3.2344475e+00  -4.8647448e-01  -9.0174041e+00
   2.2116882e+01  -2.6773258e+01   2.5000000e+02  -3.5743111e+00   9.5271138e-02  -8.8409741e+00
   2.2259526e+01  -2.6793443e+01   2.5000000e+02  -3.8838786e+00   6.6462455e-01  -8.6192367e+00
   2.2403453e+01  -2.6804352e+01   2.5000000e+02  -4.1631281e+00   1.2133455e+00  -8.3589686e+00
   2.2547895e+01  -2.6805927e+01   2.5000000e+02  -4.4115546e+00   1.7337653e+00  -8.0678355e+00
   2.2692082e+01  -2.6798159e+01   2.5000000e+02  -4.6281719e+00   2.2190933e+00  -7.7541726e+00
   2.2835244e+01  -2.6781090e+01   2.5000000e+02  -4.8116940e+00   2.6636878e+00  -7.4266468e+00
   2.2976618e+01  -2.6754810e+01   2.5000000e+02  -4.9608575e+00   3.0632410e+00  -7.0938498e+00
   2.3115452e+01  -2.6719461e+01   2.5000000e+02  -5.0748285e+00   3.4148222e+00  -6.7638826e+00
   2.3251011e+01  -2.6675231e+01   2.5000000e+02  -5.1535650e+00   3.7167683e+00  -6.4440825e+00
   2.3382576e+01  -2.6622354e+01   2.5000000e+02  -5.1980739e+00   3.9684733e+00  -6.1409270e+00
   2.3509455e+01  -2.6561113e+01   2.5000000e+02  -5.2105081e+00   4.1701951e+00  -5.8600605e+00
   2.3630984e+01  -2.6491832e+01   2.5000000e+02  -5.1940168e+00   4.3228571e+00  -5.6065300e+00
   2.3746529e+01  -2.6414879e+01   2.5000000e+02  -5.1524295e+00   4.4279427e+00  -5.3850172e+00
   2.3855494e+01  -2.6330661e+01   2.5000000e+02  -5.0897849e+00   4.4874515e+00  -5.2000262e+00
   2.3957318e+01  -2.6239621e+01   2.5000000e+02  -5.0097770e+00   4.5038618e+00  -5.0559888e+00
   2.4051485e+01  -2.6142240e+01   2.5000000e+02  -4.9152318e+00   4.4800989e+00  -4.9571306e+00
   2.4137520e+01  -2.6039027e+01   2.5000000e+02  -4.8076191e+00   4.4193968e+00  -4.9072734e+00
   2.4214996e+01  -2.5930524e+01   2.5000000e+02  -4.6867579e+00   4.3251046e+00  -4.9093871e+00
   2.4283534e+01  -2.5817298e+01   2.5000000e+02  -4.5506882e+00   4.2003741e+00  -4.9651198e+00
   2.4342803e+01  -2.5699936e+01   2.5000000e+02  -4.3957937e+00   4.0477932e+00  -5.0742824e+00
   2.4392524e+01  -2.5579048e+01   2.5000000e+02  -4.2172065e+00   3.8690355e+00  -5.2343401e+00
   2.4432471e+01  -2.5455260e+01   2.5000000e+02  -4.0094281e+00   3.6645660e+00  -5.4400939e+00
   2.4462467e+01  -2.5329209e+01   2.5000000e+02  -3.7671114e+00   3.4334969e+00  -5.6836053e+00
   2.4482391e+01  -2.5201543e+01   2.5000000e+02  -3.4859209e+00   3.1736769e+00  -5.9543498e+00
   2.4492172e+01  -2.5072917e+01   2.5000000e+02  -3.1632616e+00   2.8820032e+00  -6.2397293e+00
   2.4491793e+01  -2.4943986e+01   2.5000000e+02  -2.7987808e+00   2.5549524e+00  -6.5257784e+00
   2.4481286e+01  -2.4815408e+01   2.5000000e+02  -2.3945647e+00   2.1892708e+00  -6.7979944e+00
   2.4460738e+01  -2.4687835e+01   2.5000000e+02  -1.9550217e+00   1.7826871e+00  -7.0421400e+00
   2.4430282e+01  -2.4561912e+01   2.5000000e+02  -1.4865227e+00   1.3345287e+00  -7.2449730e+00
   2.4390102e+01  -2.4438274e+01   2.5000000e+02  -9.9694846e-01   8.4615573e-01  -7.3947932e+00
   2.4340427e+01  -2.4317543e+01   2.5000000e+02  -4.9517148e-01   3.2110490e-01  -7.4818995e+00
   2.4281532e+01  -2.4200325e+01   2.5000000e+02   9.4451894e-03  -2.3503957e-01  -7.4989253e+00
   2.4213738e+01  -2.4087206e+01   2.5000000e+02   5.0755401e-01  -8.1502317e-01  -7.4410790e+00
   2.4137403e+01  -2.3978750e+01   2.5000000e+02   9.9035589e-01  -1.4104816e+00  -7.3062593e+00
   2.4052930e+01  -2.3875497e+01   2.5000000e+02   1.4500652e+00  -2.0125126e+00  -7.0949809e+00
   2.3960755e+01  -2.3777959e+01   2.5000000e+02   1.8803772e+00  -2.6122750e+00  -6.8101283e+00
   2.3861352e+01  -2.3686621e+01   2.5000000e+02   2.2767598e+00  -3.2014116e+00  -6.4565616e+00
   2.3755225e+01  -2.3601934e+01   2.5000000e+02   2.6366501e+00  -3.7723942e+00  -6.0406276e+00
   2.3642911e+01  -2.3524316e+01   2.5000000e+02   2.9594599e+00  -4.3186680e+00  -5.5697076e+00
   2.3524973e+01  -2.3454149e+01   2.5000000e+02   3.2464979e+00  -4.8347309e+00  -5.0518162e+00
   2.3401998e+01  -2.3391780e+01   2.5000000e+02   3.5007896e+00  -5.3161164e+00  -4.4953125e+00
   2.3274596e+01  -2.3337513e+01   2.5000000e+02   3.7268317e+00  -5.7593566e+00  -3.9086649e+00
   2.3143399e+01  -2.3291616e+01   2.5000000e+02   3.9302962e+00  -6.1618868e+00  -3.3003288e+00
   2.3009050e+01  -2.3254314e+01   2.5000000e+02   4.1176944e+00  -6.5219720e+00  -2.6785701e+00
   2.2872211e+01  -2.3225789e+01   2.5000000e+02   4.2959568e+00  -6.8385226e+00  -2.0514146e+00
   2.2733552e+01  -2.3206182e+01   2.5000000e+02   4.4720213e+00  -7.1108940e+00  -1.4266130e+00
   2.2593752e+01  -2.3195587e+01   2.5000000e+02   4.6523807e+00  -7.3386375e+00  -8.1173429e-01
   2.2453493e+01  -2.3194058e+01   2.5000000e+02   4.8426882e+00  -7.5212702e+00  -2.1443507e-01
   2.1717233e+01  -2.3201844e+01   2.5000000e+02   5.7660078e+00  -7.8764751e+00   3.0256326e+00
   2.1589456e+01  -2.3252610e+01   2.5000000e+02   6.0517952e+00  -7.7739096e+00   3.3426108e+00
   2.1465502e+01  -2.3310923e+01   2.5000000e+02   6.3451290e+00  -7.6381385e+00   3.5732014e+00
   2.1345895e+01  -2.3376537e+01   2.5000000e+02   6.6380483e+00  -7.4770678e+00   3.7080155e+00
   2.1231146e+01  -2.3449175e+01   2.5000000e+02   6.9212905e+00  -7.2999600e+00   3.7407011e+00
   2.1121746e+01  -2.3528533e+01   2.5000000e+02   7.1847903e+00  -7.1166120e+00   3.6686692e+00
   2.1018166e+01  -2.3614274e+01   2.5000000e+02   7.4182602e+00  -6.9364750e+00   3.4934486e+00
   2.0920855e+01  -2.3706036e+01   2.5000000e+02   7.6118650e+00  -6.7678361e+00   3.2205430e+00
   2.0830238e+01  -2.3803431e+01   2.5000000e+02   7.7568719e+00  -6.6171933e+00   2.8589623e+00
   2.0746715e+01  -2.3906044e+01   2.5000000e+02   7.8462292e+00  -6.4888713e+00   2.4204572e+00
   2.0670657e+01  -2.4013440e+01   2.5000000e+02   7.8750015e+00  -6.3848896e+00   1.9185084e+00
   2.0602407e+01  -2.4125160e+01   2.5000000e+02   7.8405760e+00  -6.3050866e+00   1.3672990e+00
   2.0542276e+01  -2.4240728e+01   2.5000000e+02   7.7426227e+00  -6.2474430e+00   7.8068278e-01
   2.0490546e+01  -2.4359647e+01   2.5000000e+02   7.5828175e+00  -6.2085630e+00   1.7139124e-01
   2.0447460e+01  -2.4481407e+01   2.5000000e+02   7.3643934e+00  -6.1842131e+00  -4.4951691e-01
   2.0413229e+01  -2.4605485e+01   2.5000000e+02   7.0916386e+00  -6.1698537e+00  -1.0728940e+00
   2.0388028e+01  -2.4731343e+01   2.5000000e+02   6.7694631e+00  -6.1610564e+00  -1.6914335e+00
   2.0371993e+01  -2.4858436e+01   2.5000000e+02   6.4030692e+00  -6.1537595e+00  -2.2995030e+00
   2.0365222e+01  -2.4986213e+01   2.5000000e+02   5.9977684e+00  -6.1443348e+00  -2.8929021e+00
   2.0367773e+01  -2.5114117e+01   2.5000000e+02   5.5588927e+00  -6.1294802e+00  -3.4686423e+00
   2.0379663e+01  -2.5241588e+01   2.5000000e+02   5.0917163e+00  -6.1059816e+00  -4.0247954e+00
   2.0400871e+01  -2.5368068e+01   2.5000000e+02   4.6013358e+00  -6.0704107e+00  -4.5603604e+00
   2.0431332e+01  -2.5492999e+01   2.5000000e+02   4.0925401e+00  -6.0188436e+00  -5.0749987e+00
   2.0470940e+01  -2.5615832e+01   2.5000000e+02   3.5696394e+00  -5.9466751e+00  -5.5687176e+00
   2.0519549e+01  -2.5736021e+01   2.5000000e+02   3.0364174e+00  -5.8486083e+00  -6.0413787e+00
   2.0576970e+01  -2.5853033e+01   2.5000000e+02   2.4961422e+00  -5.7188588e+00  -6.4921910e+00
   2.0642973e+01  -2.5966347e+01   2.5000000e+02   1.9517581e+00  -5.5515747e+00  -6.9192597e+00
   2.0717289e+01  -2.6075456e+01   2.5000000e+02   1.4061673e+00  -5.3414111e+00  -7.3193467e+00
   2.0799606e+01  -2.6179872e+01   2.5000000e+02   8.6252263e-01  -5.0841639e+00  -7.6879053e+00
   2.0889578e+01  -2.6279124e+01   2.5000000e+02   3.2445281e-01  -4.7773044e+00  -8.0194597e+00
   2.0986819e+01  -2.6372765e+01   2.5000000e+02  -2.0391788e-01  -4.4203333e+00  -8.3081690e+00
   2.1090905e+01  -2.6460372e+01   2.5000000e+02  -7.1813618e-01  -4.0148648e+00  -8.5484971e+00
   2.1201383e+01  -2.6541549e+01   2.5000000e+02  -1.2137862e+00  -3.5644315e+00  -8.7358193e+00
   2.1317763e+01  -2.6615925e+01   2.5000000e+02  -1.6868914e+00  -3.0741664e+00  -8.8667896e+00
   2.1439528e+01  -2.6683162e+01   2.5000000e+02  -2.1343375e+00  -2.5503540e+00  -8.9395086e+00
   2.1566131e+01  -2.6742955e+01   2.5000000e+02  -2.5540940e+00  -2.0000688e+00  -8.9534745e+00
   2.1697003e+01  -2.6795028e+01   2.5000000e+02  -2.9452372e+00  -1.4308820e+00  -8.9094695e+00
   2.1831550e+01  -2.6839145e+01   2.5000000e+02  -3.3078167e+00  -8.5068549e-01  -8.8094025e+00
   2.1969161e+01  -2.6875102e+01   2.5000000e+02  -3.6425246e+00  -2.6757696e-01  -8.6562607e+00
   2.2109206e+01  -2.6902734e+01   2.5000000e+02  -3.9503317e+00   3.1023151e-01  -8.4540980e+00
   2.2251046e+01  -2.6921915e+01   2.5000000e+02  -4.2321219e+00   8.7457931e-01  -8.2080720e+00
   2.2394029e+01  -2.6932557e+01   2.5000000e+02  -4.4883715e+00   1.4175451e+00  -7.9244733e+00
   2.2537499e+01  -2.6934610e+01   2.5000000e+02  -4.7189726e+00   1.9317642e+00  -7.6106524e+00
   2.2680797e+01  -2.6928065e+01   2.5000000e+02  -4.9232023e+00   2.4107642e+00  -7.2748031e+00
   2.2823264e+01  -2.6912952e+01   2.5000000e+02  -5.0998418e+00   2.8492735e+00  -6.9256140e+00
   2.2964246e+01  -2.6889341e+01   2.5000000e+02  -5.2474492e+00   3.2434376e+00  -6.5717941e+00
   2.3103099e+01  -2.6857339e+01   2.5000000e+02  -5.3647151e+00   3.5908660e+00  -6.2215939e+00
   2.3239186e+01  -2.6817095e+01   2.5000000e+02  -5.4508448e+00   3.8905015e+00  -5.8824085e+00
   2.3371887e+01  -2.6768793e+01   2.5000000e+02  -5.5058738e+00   4.1423846e+00  -5.5605606e+00
   2.3500601e+01  -2.6712653e+01   2.5000000e+02  -5.5308609e+00   4.3473598e+00  -5.2612793e+00
   2.3624745e+01  -2.6648934e+01   2.5000000e+02  -5.5279145e+00   4.5068099e+00  -4.9888632e+00
   2.3743763e+01  -2.6577925e+01   2.5000000e+02  -5.5000304e+00   4.6224798e+00  -4.7469618e+00
   2.3857121e+01  -2.6499951e+01   2.5000000e+02  -5.4507952e+00   4.6963886e+00  -4.5388705e+00
   2.3964317e+01  -2.6415367e+01   2.5000000e+02  -5.3839761e+00   4.7308286e+00  -4.3677497e+00
   2.4064881e+01  -2.6324555e+01   2.5000000e+02  -5.3030582e+00   4.7283826e+00  -4.2367554e+00
   2.4158373e+01  -2.6227927e+01   2.5000000e+02  -5.2108023e+00   4.6919323e+00  -4.1490123e+00
   2.4244391e+01  -2.6125919e+01   2.5000000e+02  -5.1088565e+00   4.6246075e+00  -4.1074302e+00
   2.4322568e+01  -2.6018991e+01   2.5000000e+02  -4.9974777e+00   4.5296460e+00  -4.1144296e+00
   2.4392575e+01  -2.5907622e+01   2.5000000e+02  -4.8753951e+00   4.4101652e+00  -4.1715722e+00
   2.4454124e+01  -2.5792311e+01   2.5000000e+02  -4.7398600e+00   4.2688704e+00  -4.2791335e+00
   2.4506966e+01  -2.5673573e+01   2.5000000e+02  -4.5868715e+00   4.1077256e+00  -4.4357313e+00
   2.4550892e+01  -2.5551935e+01   2.5000000e+02  -4.4115922e+00   3.9276511e+00  -4.6380123e+00
   2.4585736e+01  -2.5427937e+01   2.5000000e+02  -4.2089313e+00   3.7283182e+00  -4.8804509e+00
   2.4611372e+01  -2.5302127e+01   2.5000000e+02  -3.9741931e+00   3.5080798e+00  -5.1553825e+00
   2.4627716e+01  -2.5175060e+01   2.5000000e+02  -3.7037277e+00   3.2641014e+00  -5.4532142e+00
   2.4634725e+01  -2.5047293e+01   2.5000000e+02  -3.3954456e+00   2.9926849e+00  -5.7628566e+00
   2.4632399e+01  -2.4919386e+01   2.5000000e+02  -3.0491456e+00   2.6897847e+00  -6.0722558e+00
   2.4620777e+01  -2.4791896e+01   2.5000000e+02  -2.6665761e+00   2.3516150e+00  -6.3690072e+00
   2.4599937e+01  -2.4665380e+01   2.5000000e+02  -2.2513208e+00   1.9753018e+00  -6.6408893e+00
   2.4569998e+01  -2.4540385e+01   2.5000000e+02  -1.8085246e+00   1.5594246e+00  -6.8763324e+00
   2.4531116e+01  -2.4417453e+01   2.5000000e+02  -1.3445994e+00   1.1044215e+00  -7.0648020e+00
   2.4483484e+01  -2.4297112e+01   2.5000000e+02  -8.6689498e-01   6.1273334e-01  -7.1971448e+00
   2.4427330e+01  -2.4179882e+01   2.5000000e+02  -3.8340539e-01   8.8749030e-02  -7.2659136e+00
   2.4362920e+01  -2.4066264e+01   2.5000000e+02   9.7588496e-02  -4.6150560e-01  -7.2656638e+00
   2.4290548e+01  -2.3956746e+01   2.5000000e+02   5.6792232e-01  -1.0308126e+00  -7.1931937e+00
   2.4210544e+01  -2.3851793e+01   2.5000000e+02   1.0199789e+00  -1.6112874e+00  -7.0476060e+00
   2.4123266e+01  -2.3751854e+01   2.5000000e+02   1.4471217e+00  -2.1948834e+00  -6.8302280e+00
   2.4029099e+01  -2.3657353e+01   2.5000000e+02   1.8440728e+00  -2.7738570e+00  -6.5443203e+00
   2.3928457e+01  -2.3568691e+01   2.5000000e+02   2.2071430e+00  -3.3410718e+00  -6.1946884e+00
   2.3821778e+01  -2.3486242e+01   2.5000000e+02   2.5343598e+00  -3.8902171e+00  -5.7872398e+00
   2.3709522e+01  -2.3410356e+01   2.5000000e+02   2.8254638e+00  -4.4158856e+00  -5.3285913e+00
   2.3592172e+01  -2.3341352e+01   2.5000000e+02   3.0818219e+00  -4.9135875e+00  -4.8257336e+00
   2.3470229e+01  -2.3279522e+01   2.5000000e+02   3.3062948e+00  -5.3797036e+00  -4.2858085e+00
   2.3344211e+01  -2.3225124e+01   2.5000000e+02   3.5030531e+00  -5.8114266e+00  -3.7159290e+00
   2.3214650e+01  -2.3178389e+01   2.5000000e+02   3.6773603e+00  -6.2066641e+00  -3.1230900e+00
   2.3082095e+01  -2.3139511e+01   2.5000000e+02   3.8352857e+00  -6.5639454e+00  -2.5140656e+00
   2.2947102e+01  -2.3108655e+01   2.5000000e+02   3.9834066e+00  -6.8822934e+00  -1.8953532e+00
   2.2810237e+01  -2.3085949e+01   2.5000000e+02   4.1284330e+00  -7.1610516e+00  -1.2731493e+00
   2.2672075e+01  -2.3071488e+01   2.5000000e+02   4.2768474e+00  -7.3996663e+00  -6.5344492e-01
   2.2533193e+01  -2.3065334e+01   2.5000000e+02   4.4345648e+00  -7.5974824e+00  -4.2204846e-02
   2.2394173e+01  -2.3067512e+01   2.5000000e+02   4.6066089e+00  -7.7535921e+00   5.5429215e-01
   2.2255595e+01  -2.3078012e+01   2.5000000e+02   4.7968595e+00  -7.8668367e+00   1.1290377e+00
   2.2118039e+01  -2.3096791e+01   2.5000000e+02   5.0078335e+00  -7.9360102e+00   1.6738430e+00
   2.1982081e+01  -2.3123771e+01   2.5000000e+02   5.2404937e+00  -7.9602976e+00   2.1790783e+00
   2.1848292e+01  -2.3158837e+01   2.5000000e+02   5.4940794e+00  -7.9398684e+00   2.6336976e+00
   2.1145197e+01  -2.3348129e+01   2.5000000e+02   6.7185654e+00  -7.2744108e+00   4.6954377e+00
   2.1034417e+01  -2.3428449e+01   2.5000000e+02   7.0079204e+00  -7.0701054e+00   4.6380415e+00
   2.0929208e+01  -2.3514920e+01   2.5000000e+02   7.2712355e+00  -6.8720682e+00   4.4757169e+00
   2.0829984e+01  -2.3607211e+01   2.5000000e+02   7.4984462e+00  -6.6888707e+00   4.2136444e+00
   2.0737135e+01  -2.3704970e+01   2.5000000e+02   7.6803908e+00  -6.5271991e+00   3.8604809e+00
   2.0651028e+01  -2.3807824e+01   2.5000000e+02   7.8093890e+00  -6.3914994e+00   3.4276266e+00
   2.0572011e+01  -2.3915378e+01   2.5000000e+02   7.8797058e+00  -6.2838679e+00   2.9283095e+00
   2.0500403e+01  -2.4027220e+01   2.5000000e+02   7.8878341e+00  -6.2041502e+00   2.3765840e+00
   2.0436500e+01  -2.4142920e+01   2.5000000e+02   7.8325288e+00  -6.1502611e+00   1.7863445e+00
   2.0380567e+01  -2.4262030e+01   2.5000000e+02   7.7146013e+00  -6.1186361e+00   1.1705275e+00
   2.0332845e+01  -2.4384091e+01   2.5000000e+02   7.5365162e+00  -6.1047847e+00   5.4047442e-01
   2.0293540e+01  -2.4508629e+01   2.5000000e+02   7.3019037e+00  -6.1038284e+00  -9.4262914e-02
   2.0262832e+01  -2.4635160e+01   2.5000000e+02   7.0150977e+00  -6.1109818e+00  -7.2595739e-01
   2.0240865e+01  -2.4763189e+01   2.5000000e+02   6.6808070e+00  -6.1218779e+00  -1.3484522e+00
   2.0227752e+01  -2.4892218e+01   2.5000000e+02   6.3039257e+00  -6.1327340e+00  -1.9569489e+00
   2.0223573e+01  -2.5021738e+01   2.5000000e+02   5.8895106e+00  -6.1403333e+00  -2.5477417e+00
   2.0228372e+01  -2.5151242e+01   2.5000000e+02   5.4427447e+00  -6.1418608e+00  -3.1181623e+00
   2.0242159e+01  -2.5280216e+01   2.5000000e+02   4.9689308e+00  -6.1346314e+00  -3.6665162e+00
   2.0264908e+01  -2.5408150e+01   2.5000000e+02   4.4733346e+00  -6.1157684e+00  -4.1920946e+00
   2.0296556e+01  -2.5534537e+01   2.5000000e+02   3.9609896e+00  -6.0818963e+00  -4.6950349e+00
   2.0337006e+01  -2.5658872e+01   2.5000000e+02   3.4364830e+00  -6.0289201e+00  -5.1760379e+00
   2.0386124e+01  -2.5780658e+01   2.5000000e+02   2.9037746e+00  -5.9519582e+00  -5.6359136e+00
   2.0443739e+01  -2.5899405e+01   2.5000000e+02   2.3661732e+00  -5.8454805e+00  -6.0750116e+00
   2.0509646e+01  -2.6014637e+01   2.5000000e+02   1.8264453e+00  -5.7036573e+00  -6.4926991e+00
   2.0583602e+01  -2.6125888e+01   2.5000000e+02   1.2871177e+00  -5.5208967e+00  -6.8869515e+00
   2.0665331e+01  -2.6232708e+01   2.5000000e+02   7.5080137e-01  -5.2924543e+00  -7.2542734e+00
   2.0754524e+01  -2.6334661e+01   2.5000000e+02   2.2050603e-01  -5.0150132e+00  -7.5899139e+00
   2.0850836e+01  -2.6431334e+01   2.5000000e+02  -3.0024100e-01  -4.6870998e+00  -7.8883509e+00
   2.0953892e+01  -2.6522331e+01   2.5000000e+02  -8.0743606e-01  -4.3092530e+00  -8.1439448e+00
   2.1063287e+01  -2.6607279e+01   2.5000000e+02  -1.2968988e+00  -3.8839349e+00  -8.3515547e+00
   2.1178586e+01  -2.6685829e+01   2.5000000e+02  -1.7646828e+00  -3.4152534e+00  -8.5069923e+00
   2.1299326e+01  -2.6757658e+01   2.5000000e+02  -2.2075097e+00  -2.9085863e+00  -8.6072577e+00
   2.1425020e+01  -2.6822469e+01   2.5000000e+02  -2.6230988e+00  -2.3702174e+00  -8.6505783e+00
   2.1555157e+01  -2.6879996e+01   2.5000000e+02  -3.0103325e+00  -1.8070661e+00  -8.6363110e+00
   2.1689206e+01  -2.6929998e+01   2.5000000e+02  -3.3691893e+00  -1.2265293e+00  -8.5648603e+00
   2.1826617e+01  -2.6972270e+01   2.5000000e+02  -3.7005587e+00  -6.3638605e-01  -8.4376138e+00
   2.1966823e+01  -2.7006635e+01   2.5000000e+02  -4.0058800e+00  -4.4755918e-02  -8.2570159e+00
   2.2109244e+01  -2.7032950e+01   2.5000000e+02  -4.2867804e+00   5.4000745e-01  -8.0266732e+00
   2.2253289e+01  -2.7051107e+01   2.5000000e+02  -4.5447032e+00   1.1094869e+00  -7.7514868e+00
   2.2398361e+01  -2.7061029e+01   2.5000000e+02  -4.7805918e+00   1.6554791e+00  -7.4377415e+00
   2.2543856e+01  -2.7062675e+01   2.5000000e+02  -4.9946929e+00   2.1703608e+00  -7.0930476e+00
   2.2689169e+01  -2.7056037e+01   2.5000000e+02  -5.1864911e+00   2.6475139e+00  -6.7261179e+00
   2.2833694e+01  -2.7041145e+01   2.5000000e+02  -5.3548084e+00   3.0817065e+00  -6.3463347e+00
   2.2976832e+01  -2.7018060e+01   2.5000000e+02  -5.4980428e+00   3.4693516e+00  -5.9631999e+00
   2.3117987e+01  -2.6986877e+01   2.5000000e+02  -5.6145208e+00   3.8085439e+00  -5.5857386e+00
   2.3256577e+01  -2.6947727e+01   2.5000000e+02  -5.7029098e+00   4.0989287e+00  -5.2219406e+00
   2.3392029e+01  -2.6900773e+01   2.5000000e+02  -5.7625690e+00   4.3413544e+00  -4.8784775e+00
   2.3523785e+01  -2.6846208e+01   2.5000000e+02  -5.7938118e+00   4.5374921e+00  -4.5606170e+00
   2.3651306e+01  -2.6784261e+01   2.5000000e+02  -5.7980230e+00   4.6894842e+00  -4.2723322e+00
   2.3774074e+01  -2.6715185e+01   2.5000000e+02  -5.7775759e+00   4.7996698e+00  -4.0166580e+00
   2.3891591e+01  -2.6639268e+01   2.5000000e+02  -5.7356308e+00   4.8704600e+00  -3.7960196e+00
   2.4003384e+01  -2.6556821e+01   2.5000000e+02  -5.6757818e+00   4.9043166e+00  -3.6126043e+00
   2.4109009e+01  -2.6468184e+01   2.5000000e+02  -5.6016652e+00   4.9038152e+00  -3.4685552e+00
   2.4208047e+01  -2.6373721e+01   2.5000000e+02  -5.5165252e+00   4.8717126e+00  -3.3661126e+00
   2.4300111e+01  -2.6273816e+01   2.5000000e+02  -5.4228219e+00   4.8109887e+00  -3.3075483e+00
   2.4384844e+01  -2.6168879e+01   2.5000000e+02  -5.3219202e+00   4.7248186e+00  -3.2949784e+00
   2.4461924e+01  -2.6059335e+01   2.5000000e+02  -5.2138612e+00   4.6164397e+00  -3.3301110e+00
   2.4531059e+01  -2.5945630e+01   2.5000000e+02  -5.0972834e+00   4.4889441e+00  -3.4139211e+00
   2.4591995e+01  -2.5828222e+01   2.5000000e+02  -4.9694784e+00   4.3449890e+00  -3.5463005e+00
   2.4644510e+01  -2.5707585e+01   2.5000000e+02  -4.8266132e+00   4.1864876e+00  -3.7257476e+00
   2.4688422e+01  -2.5584204e+01   2.5000000e+02  -4.6641042e+00   4.0143093e+00  -3.9490895e+00
   2.4723581e+01  -2.5458573e+01   2.5000000e+02  -4.4771033e+00   3.8280564e+00  -4.2113723e+00
   2.4749874e+01  -2.5331192e+01   2.5000000e+02  -4.2610658e+00   3.6259696e+00  -4.5058457e+00
   2.4767226e+01  -2.5202570e+01   2.5000000e+02  -4.0123138e+00   3.4050175e+00  -4.8241138e+00
   2.4775596e+01  -2.5073216e+01   2.5000000e+02  -3.7284654e+00   3.1611596e+00  -5.1564948e+00
   2.4774981e+01  -2.4943641e+01   2.5000000e+02  -3.4087231e+00   2.8898069e+00  -5.4924083e+00
   2.4765409e+01  -2.4814356e+01   2.5000000e+02  -3.0539384e+00   2.5863998e+00  -5.8208400e+00
   2.4746948e+01  -2.4685869e+01   2.5000000e+02  -2.6665389e+00   2.2470436e+00  -6.1307006e+00
   2.4719697e+01  -2.4558683e+01   2.5000000e+02  -2.2503330e+00   1.8690893e+00  -6.4111779e+00
   2.4683788e+01  -2.4433295e+01   2.5000000e+02  -1.8103234e+00   1.4515936e+00  -6.6519976e+00
   2.4639386e+01  -2.4310193e+01   2.5000000e+02  -1.3525351e+00   9.9557749e-01  -6.8437032e+00
   2.4586688e+01  -2.4189855e+01   2.5000000e+02  -8.8385506e-01   5.0406340e-01  -6.9779879e+00
   2.4525921e+01  -2.4072746e+01   2.5000000e+02  -4.1181815e-01  -1.8117654e-02  -7.0480778e+00
   2.4457340e+01  -2.3959319e+01   2.5000000e+02   5.5689192e-02  -5.6468527e-01  -7.0491006e+00
   2.4381229e+01  -2.3850011e+01   2.5000000e+02   5.1083116e-01  -1.1283902e+00  -6.9783480e+00
   2.4297899e+01  -2.3745241e+01   2.5000000e+02   9.4628673e-01  -1.7015308e+00  -6.8353583e+00
   2.4207686e+01  -2.3645412e+01   2.5000000e+02   1.3556916e+00  -2.2764228e+00  -6.6217922e+00
   2.4110948e+01  -2.3550906e+01   2.5000000e+02   1.7340061e+00  -2.8458061e+00  -6.3411095e+00
   2.4008069e+01  -2.3462082e+01   2.5000000e+02   2.0777216e+00  -3.4031056e+00  -5.9981429e+00
   2.3899452e+01  -2.3379281e+01   2.5000000e+02   2.3849618e+00  -3.9425866e+00  -5.5986665e+00
   2.3785519e+01  -2.3302816e+01   2.5000000e+02   2.6554712e+00  -4.4594314e+00  -5.1489749e+00
   2.3666711e+01  -2.3232978e+01   2.5000000e+02   2.8905308e+00  -4.9496961e+00  -4.6555957e+00
   2.3543485e+01  -2.3170032e+01   2.5000000e+02   3.0928513e+00  -5.4102559e+00  -4.1250626e+00
   2.3416313e+01  -2.3114217e+01   2.5000000e+02   3.2664306e+00  -5.8387099e+00  -3.5637757e+00
   2.3285681e+01  -2.3065743e+01   2.5000000e+02   3.4163702e+00  -6.2332799e+00  -2.9779016e+00
   2.3152084e+01  -2.3024795e+01   2.5000000e+02   3.5486527e+00  -6.5926958e+00  -2.3733134e+00
   2.3016028e+01  -2.2991526e+01   2.5000000e+02   3.6698376e+00  -6.9160667e+00  -1.7555408e+00
   2.2878028e+01  -2.2966062e+01   2.5000000e+02   3.7867371e+00  -7.2027140e+00  -1.1297877e+00
   2.2738605e+01  -2.2948500e+01   2.5000000e+02   3.9060674e+00  -7.4519876e+00  -5.0099107e-01
   2.2598284e+01  -2.2938904e+01   2.5000000e+02   4.0341060e+00  -7.6630661e+00   1.2601830e-01
   2.2457593e+01  -2.2937313e+01   2.5000000e+02   4.1764208e+00  -7.8347778e+00   7.4617898e-01
   2.2317061e+01  -2.2943731e+01   2.5000000e+02   4.3376083e+00  -7.9655524e+00   1.3538064e+00
   2.2177218e+01  -2.2958135e+01   2.5000000e+02   4.5211248e+00  -8.0535362e+00   1.9420766e+00
   2.2038590e+01  -2.2980470e+01   2.5000000e+02   4.7291168e+00  -8.0969529e+00   2.5026423e+00
   2.1901700e+01  -2.3010651e+01   2.5000000e+02   4.9622771e+00  -8.0946582e+00   3.0254119e+00
   2.1767065e+01  -2.3048566e+01   2.5000000e+02   5.2197151e+00  -8.0468024e+00   3.4986853e+00
   2.1635195e+01  -2.3094070e+01   2.5000000e+02   5.4988132e+00  -7.9554471e+00   3.9097225e+00
   2.1506590e+01  -2.3146993e+01   2.5000000e+02   5.7951833e+00  -7.8249411e+00   4.2456301e+00
   2.1381739e+01  -2.3207133e+01   2.5000000e+02   6.1026633e+00  -7.6619593e+00   4.4945267e+00
   2.1261121e+01  -2.3274263e+01   2.5000000e+02   6.4134855e+00  -7.4751422e+00   4.6466619e+00
   2.0628649e+01  -2.3624577e+01   2.5000000e+02   7.5686301e+00  -6.3643766e+00   4.7707047e+00
   2.0542963e+01  -2.3726459e+01   2.5000000e+02   7.7245494e+00  -6.2283601e+00   4.3436100e+00
   2.0463818e+01  -2.3832726e+01   2.5000000e+02   7.8256782e+00  -6.1228932e+00   3.8520428e+00
   2.0391495e+01  -2.3943022e+01   2.5000000e+02   7.8682121e+00  -6.0475633e+00   3.3090707e+00
   2.0326254e+01  -2.4056978e+01   2.5000000e+02   7.8503940e+00  -6.0001640e+00   2.7276379e+00
   2.0268331e+01  -2.4174209e+01   2.5000000e+02   7.7723664e+00  -5.9770990e+00   2.1198652e+00
   2.0217943e+01  -2.4294321e+01   2.5000000e+02   7.6358407e+00  -5.9738758e+00   1.4964647e+00
   2.0175281e+01  -2.4416908e+01   2.5000000e+02   7.4436585e+00  -5.9855932e+00   8.6653248e-01
   2.0140511e+01  -2.4541555e+01   2.5000000e+02   7.1993581e+00  -6.0073909e+00   2.3754067e-01
   2.0113776e+01  -2.4667837e+01   2.5000000e+02   6.9068508e+00  -6.0347938e+00  -3.8445235e-01
   2.0095189e+01  -2.4795325e+01   2.5000000e+02   6.5702380e+00  -6.0639162e+00  -9.9452237e-01
   2.0084841e+01  -2.4923582e+01   2.5000000e+02   6.1938010e+00  -6.0915289e+00  -1.5886362e+00
   2.0082791e+01  -2.5052169e+01   2.5000000e+02   5.7820494e+00  -6.1149878e+00  -2.1635231e+00
   2.0089074e+01  -2.5180644e+01   2.5000000e+02   5.3397845e+00  -6.1320625e+00  -2.7167101e+00
   2.0103693e+01  -2.5308563e+01   2.5000000e+02   4.8720771e+00  -6.1406831e+00  -3.2465974e+00
   2.0126625e+01  -2.5435483e+01   2.5000000e+02   4.3841238e+00  -6.1386514e+00  -3.7525838e+00
   2.0157816e+01  -2.5560964e+01   2.5000000e+02   3.8810058e+00  -6.1233522e+00  -4.2350381e+00
   2.0197183e+01  -2.5684569e+01   2.5000000e+02   3.3674169e+00  -6.0915192e+00  -4.6951127e+00
   2.0244615e+01  -2.5805866e+01   2.5000000e+02   2.8474227e+00  -6.0391112e+00  -5.1343698e+00
   2.0299970e+01  -2.5924428e+01   2.5000000e+02   2.3243470e+00  -5.9613512e+00  -5.5542405e+00
   2.0363078e+01  -2.6039840e+01   2.5000000e+02   1.8007922e+00  -5.8529494e+00  -5.9554720e+00
   2.0433738e+01  -2.6151694e+01   2.5000000e+02   1.2788793e+00  -5.7085109e+00  -6.3376167e+00
   2.0511723e+01  -2.6259594e+01   2.5000000e+02   7.6056034e-01  -5.5230535e+00  -6.6987799e+00
   2.0596777e+01  -2.6363157e+01   2.5000000e+02   2.4797381e-01  -5.2925569e+00  -7.0356162e+00
   2.0688616e+01  -2.6462014e+01   2.5000000e+02  -2.5628600e-01  -5.0144227e+00  -7.3436319e+00
   2.0786929e+01  -2.6555812e+01   2.5000000e+02  -7.4907762e-01  -4.6877529e+00  -7.6176951e+00
   2.0891382e+01  -2.6644216e+01   2.5000000e+02  -1.2268349e+00  -4.3133953e+00  -7.8526254e+00
   2.1001613e+01  -2.6726907e+01   2.5000000e+02  -1.6858460e+00  -3.8938102e+00  -8.0436880e+00
   2.1117239e+01  -2.6803589e+01   2.5000000e+02  -2.1226815e+00  -3.4327657e+00  -8.1869432e+00
   2.1237854e+01  -2.6873984e+01   2.5000000e+02  -2.5345603e+00  -2.9350366e+00  -8.2793826e+00
   2.1363032e+01  -2.6937839e+01   2.5000000e+02  -2.9196655e+00  -2.4061264e+00  -8.3189080e+00
   2.1492327e+01  -2.6994921e+01   2.5000000e+02  -3.2772568e+00  -1.8521153e+00  -8.3042593e+00
   2.1625278e+01  -2.7045024e+01   2.5000000e+02  -3.6076602e+00  -1.2795674e+00  -8.2349476e+00
   2.1761406e+01  -2.7087966e+01   2.5000000e+02  -3.9120707e+00  -6.9554172e-01  -8.1112843e+00
   2.1900221e+01  -2.7123590e+01   2.5000000e+02  -4.1922845e+00  -1.0756381e-01  -7.9345043e+00
   2.2041219e+01  -2.7151766e+01   2.5000000e+02  -4.4503675e+00   4.7641404e-01  -7.7069508e+00
   2.2183888e+01  -2.7172392e+01   2.5000000e+02  -4.6883224e+00   1.0481718e+00  -7.4322822e+00
   2.2327710e+01  -2.7185392e+01   2.5000000e+02  -4.9077717e+00   1.5994706e+00  -7.1156423e+00
   2.2472160e+01  -2.7190719e+01   2.5000000e+02  -5.1097074e+00   2.1224088e+00  -6.7637116e+00
   2.2616712e+01  -2.7188354e+01   2.5000000e+02  -5.2943418e+00   2.6098769e+00  -6.3845887e+00
   2.2760838e+01  -2.7178304e+01   2.5000000e+02  -5.4610750e+00   3.0559955e+00  -5.9874852e+00
   2.2904013e+01  -2.7160607e+01   2.5000000e+02  -5.6086234e+00   3.4565011e+00  -5.5821820e+00
   2.3045716e+01  -2.7135328e+01   2.5000000e+02  -5.7352626e+00   3.8089294e+00  -5.1784076e+00
   2.3185431e+01  -2.7102558e+01   2.5000000e+02  -5.8391691e+00   4.1125779e+00  -4.7852005e+00
   2.3322653e+01  -2.7062417e+01   2.5000000e+02  -5.9188044e+00   4.3682684e+00  -4.4103509e+00
   2.3456885e+01  -2.7015051e+01   2.5000000e+02  -5.9732475e+00   4.5779291e+00  -4.0601239e+00
   2.3587643e+01  -2.6960633e+01   2.5000000e+02  -6.0024439e+00   4.7441555e+00  -3.7391873e+00
   2.3714460e+01  -2.6899360e+01   2.5000000e+02  -6.0073143e+00   4.8698125e+00  -3.4507909e+00
   2.3836884e+01  -2.6831455e+01   2.5000000e+02  -5.9897189e+00   4.9577504e+00  -3.1971018e+00
   2.3954480e+01  -2.6757162e+01   2.5000000e+02  -5.9522859e+00   5.0106698e+00  -2.9796180e+00
   2.4066835e+01  -2.6676751e+01   2.5000000e+02  -5.8981524e+00   5.0311207e+00  -2.7994933e+00
   2.4173557e+01  -2.6590510e+01   2.5000000e+02  -5.8306233e+00   5.0215758e+00  -2.6578579e+00
   2.4274276e+01  -2.6498750e+01   2.5000000e+02  -5.7528270e+00   4.9845468e+00  -2.5559449e+00
   2.4368646e+01  -2.6401800e+01   2.5000000e+02  -5.6673738e+00   4.9226797e+00  -2.4951229e+00
   2.4456347e+01  -2.6300007e+01   2.5000000e+02  -5.5760690e+00   4.8387935e+00  -2.4767902e+00
   2.4537086e+01  -2.6193732e+01   2.5000000e+02  -5.4796933e+00   4.7358394e+00  -2.5022033e+00
   2.4610595e+01  -2.6083355e+01   2.5000000e+02  -5.3778843e+00   4.6167839e+00  -2.5722332e+00
   2.4676637e+01  -2.5969265e+01   2.5000000e+02  -5.2691079e+00   4.4844067e+00  -2.6871205e+00
   2.4734999e+01  -2.5851867e+01   2.5000000e+02  -5.1507548e+00   4.3410623e+00  -2.8462310e+00
   2.4785500e+01  -2.5731573e+01   2.5000000e+02  -5.0193402e+00   4.1883991e+00  -3.0478308e+00
   2.4827988e+01  -2.5608807e+01   2.5000000e+02  -4.8708193e+00   4.0271098e+00  -3.2889152e+00
   2.4862338e+01  -2.5483997e+01   2.5000000e+02  -4.7009664e+00   3.8567233e+00  -3.5651555e+00
   2.4888458e+01  -2.5357578e+01   2.5000000e+02  -4.5058180e+00   3.6755087e+00  -3.8708787e+00
   2.4906283e+01  -2.5229992e+01   2.5000000e+02  -4.2820813e+00   3.4805203e+00  -4.1992176e+00
   2.4915777e+01  -2.5101678e+01   2.5000000e+02  -4.0274464e+00   3.2677849e+00  -4.5423532e+00
   2.4916933e+01  -2.4973082e+01   2.5000000e+02  -3.7408030e+00   3.0326749e+00  -4.8917546e+00
   2.4909775e+01  -2.4844645e+01   2.5000000e+02  -3.4222708e+00   2.7703728e+00  -5.2384733e+00
   2.4894352e+01  -2.4716810e+01   2.5000000e+02  -3.0731429e+00   2.4764294e+00  -5.5733593e+00
   2.4870742e+01  -2.4590012e+01   2.5000000e+02  -2.6957604e+00   2.1472887e+00  -5.8872196e+00
   2.4839050e+01  -2.4464685e+01   2.5000000e+02  -2.2934364e+00   1.7807681e+00  -6.1709303e+00
   2.4799409e+01  -2.4341255e+01   2.5000000e+02  -1.8704043e+00   1.3763721e+00  -6.4156053e+00
   2.4751974e+01  -2.4220141e+01   2.5000000e+02  -1.4318010e+00   9.3543534e-01  -6.6128629e+00
   2.4696929e+01  -2.4101753e+01   2.5000000e+02  -9.8364608e-01   4.6108659e-01  -6.7551723e+00
   2.4634479e+01  -2.3986490e+01   2.5000000e+02  -5.3268388e-01  -4.1985252e-02  -6.8363070e+00
   2.4564853e+01  -2.3874741e+01   2.5000000e+02  -8.6124566e-02  -5.6787139e-01  -6.8517448e+00
   2.4488303e+01  -2.3766879e+01   2.5000000e+02   3.4876262e-01  -1.1098882e+00  -6.7989504e+00
   2.4405102e+01  -2.3663268e+01   2.5000000e+02   7.6509061e-01  -1.6609993e+00  -6.6774688e+00
   2.4315542e+01  -2.3564252e+01   2.5000000e+02   1.1568044e+00  -2.2142578e+00  -6.4887825e+00
   2.4219935e+01  -2.3470163e+01   2.5000000e+02   1.5189896e+00  -2.7631034e+00  -6.2360196e+00
   2.4118612e+01  -2.3381312e+01   2.5000000e+02   1.8480832e+00  -3.3016220e+00  -5.9235404e+00
   2.4011919e+01  -2.3297997e+01   2.5000000e+02   2.1419497e+00  -3.8246683e+00  -5.5565388e+00
   2.3900219e+01  -2.3220492e+01   2.5000000e+02   2.3998708e+00  -4.3279403e+00  -5.1406500e+00
   2.3783890e+01  -2.3149056e+01   2.5000000e+02   2.6224895e+00  -4.8079436e+00  -4.6816825e+00
   2.3663323e+01  -2.3083923e+01   2.5000000e+02   2.8117405e+00  -5.2619544e+00  -4.1853782e+00
   2.3538921e+01  -2.3025309e+01   2.5000000e+02   2.9707643e+00  -5.6879051e+00  -3.6572892e+00
   2.3411099e+01  -2.2973408e+01   2.5000000e+02   3.1037943e+00  -6.0842751e+00  -3.1026782e+00
   2.3280279e+01  -2.2928390e+01   2.5000000e+02   3.2160030e+00  -6.4499773e+00  -2.5264451e+00
   2.3146896e+01  -2.2890403e+01   2.5000000e+02   3.3132781e+00  -6.7842079e+00  -1.9331309e+00
   2.3011388e+01  -2.2859574e+01   2.5000000e+02   3.4019710e+00  -7.0863301e+00  -1.3268944e+00
   2.2874203e+01  -2.2836002e+01   2.5000000e+02   3.4885696e+00  -7.3557156e+00  -7.1156667e-01
   2.2735790e+01  -2.2819766e+01   2.5000000e+02   3.5794175e+00  -7.5915872e+00  -9.0753590e-02
   2.2596604e+01  -2.2810919e+01   2.5000000e+02   3.6804172e+00  -7.7928503e+00   5.3195831e-01
   2.2457102e+01  -2.2809489e+01   2.5000000e+02   3.7968057e+00  -7.9579712e+00   1.1527021e+00
   2.2317740e+01  -2.2815482e+01   2.5000000e+02   3.9329929e+00  -8.0849477e+00   1.7669225e+00
   2.2178975e+01  -2.2828878e+01   2.5000000e+02   4.0924212e+00  -8.1714401e+00   2.3689178e+00
   2.2041264e+01  -2.2849633e+01   2.5000000e+02   4.2774699e+00  -8.2151022e+00   2.9514232e+00
   2.1905057e+01  -2.2877679e+01   2.5000000e+02   4.4893606e+00  -8.2141029e+00   3.5054004e+00
   2.1770803e+01  -2.2912923e+01   2.5000000e+02   4.7280342e+00  -8.1677519e+00   4.0200548e+00
   2.1638945e+01  -2.2955249e+01   2.5000000e+02   4.9920400e+00  -8.0771095e+00   4.4832478e+00
   2.1509917e+01  -2.3004519e+01   2.5000000e+02   5.2784314e+00  -7.9454208e+00   4.8822412e+00
   2.1384148e+01  -2.3060570e+01   2.5000000e+02   5.5826891e+00  -7.7782637e+00   5.2046670e+00
   2.1262056e+01  -2.3123216e+01   2.5000000e+02   5.8987565e+00  -7.5833354e+00   5.4396092e+00
   2.1144048e+01  -2.3192253e+01   2.5000000e+02   6.2191904e+00  -7.3699182e+00   5.5785464e+00
   2.1030521e+01  -2.3267450e+01   2.5000000e+02   6.5353812e+00  -7.1481383e+00   5.6161273e+00
   2.0921856e+01  -2.3348559e+01   2.5000000e+02   6.8379573e+00  -6.9281169e+00   5.5505679e+00
   2.0818423e+01  -2.3435312e+01   2.5000000e+02   7.1172269e+00  -6.7191947e+00   5.3837392e+00
   2.0720575e+01  -2.3527420e+01   2.5000000e+02   7.3636978e+00  -6.5292767e+00   5.1209968e+00
   2.0199822e+01  -2.4001405e+01   2.5000000e+02   7.8021384e+00  -5.7940734e+00   3.5013375e+00
   2.0141510e+01  -2.4118786e+01   2.5000000e+02   7.7478458e+00  -5.7846406e+00   2.8942081e+00
   2.0090327e+01  -2.4238925e+01   2.5000000e+02   7.6365405e+00  -5.7960233e+00   2.2723136e+00
   2.0046449e+01  -2.4361457e+01   2.5000000e+02   7.4706671e+00  -5.8231770e+00   1.6440541e+00
   2.0010028e+01  -2.4486012e+01   2.5000000e+02   7.2532733e+00  -5.8611428e+00   1.0163211e+00
   1.9981199e+01  -2.4612209e+01   2.5000000e+02   6.9877100e+00  -5.9053676e+00   3.9475922e-01
   1.9960072e+01  -2.4739664e+01   2.5000000e+02   6.6774652e+00  -5.9518999e+00  -2.1593075e-01
   1.9946734e+01  -2.4867988e+01   2.5000000e+02   6.3261803e+00  -5.9974704e+00  -8.1170346e-01
   1.9941251e+01  -2.4996785e+01   2.5000000e+02   5.9377757e+00  -6.0394653e+00  -1.3890248e+00
   1.9943665e+01  -2.5125660e+01   2.5000000e+02   5.5165605e+00  -6.0758084e+00  -1.9449256e+00
   1.9953993e+01  -2.5254214e+01   2.5000000e+02   5.0673075e+00  -6.1047721e+00  -2.4771316e+00
   1.9972227e+01  -2.5382048e+01   2.5000000e+02   4.5951764e+00  -6.1247398e+00  -2.9842922e+00
   1.9998337e+01  -2.5508767e+01   2.5000000e+02   4.1054971e+00  -6.1339382e+00  -3.4661606e+00
   2.0032267e+01  -2.5633974e+01   2.5000000e+02   3.6034936e+00  -6.1301668e+00  -3.9235706e+00
   2.0073934e+01  -2.5757277e+01   2.5000000e+02   3.0939334e+00  -6.1105764e+00  -4.3582660e+00
   2.0123232e+01  -2.5878290e+01   2.5000000e+02   2.5808511e+00  -6.0715415e+00  -4.7725198e+00
   2.0180029e+01  -2.5996631e+01   2.5000000e+02   2.0674184e+00  -6.0086787e+00  -5.1685678e+00
   2.0244169e+01  -2.6111927e+01   2.5000000e+02   1.5559622e+00  -5.9170380e+00  -5.5480201e+00
   2.0315471e+01  -2.6223812e+01   2.5000000e+02   1.0481934e+00  -5.7914645e+00  -5.9113240e+00
   2.0393729e+01  -2.6331930e+01   2.5000000e+02   5.4554737e-01  -5.6270789e+00  -6.2574375e+00
   2.0478713e+01  -2.6435937e+01   2.5000000e+02   4.9569182e-02  -5.4197890e+00  -6.5837824e+00
   2.0570170e+01  -2.6535500e+01   2.5000000e+02  -4.3775690e-01  -5.1667320e+00  -6.8864857e+00
   2.0667823e+01  -2.6630299e+01   2.5000000e+02  -9.1384997e-01  -4.8665595e+00  -7.1608332e+00
   2.0771375e+01  -2.6720030e+01   2.5000000e+02  -1.3755915e+00  -4.5195041e+00  -7.4018296e+00
   2.0880505e+01  -2.6804403e+01   2.5000000e+02  -1.8195514e+00  -4.1272725e+00  -7.6046849e+00
   2.0994874e+01  -2.6883145e+01   2.5000000e+02  -2.2423711e+00  -3.6927821e+00  -7.7651767e+00
   2.1114122e+01  -2.6956002e+01   2.5000000e+02  -2.6411628e+00  -3.2198814e+00  -7.8797880e+00
   2.1237872e+01  -2.7022735e+01   2.5000000e+02  -3.0138331e+00  -2.7131126e+00  -7.9457192e+00
   2.1365730e+01  -2.7083129e+01   2.5000000e+02  -3.3593146e+00  -2.1775676e+00  -7.9607849e+00
   2.1497286e+01  -2.7136986e+01   2.5000000e+02  -3.6775952e+00  -1.6188698e+00  -7.9233658e+00
   2.1632116e+01  -2.7184130e+01   2.5000000e+02  -3.9696457e+00  -1.0432034e+00  -7.8324196e+00
   2.1769783e+01  -2.7224407e+01   2.5000000e+02  -4.2372226e+00  -4.5736825e-01  -7.6876103e+00
   2.1909840e+01  -2.7257685e+01   2.5000000e+02  -4.4826050e+00   1.3121134e-01  -7.4895307e+00
   2.2051831e+01  -2.7283854e+01   2.5000000e+02  -4.7082902e+00   7.1454911e-01  -7.2399738e+00
   2.2195291e+01  -2.7302829e+01   2.5000000e+02  -4.9166827e+00   1.2842670e+00  -6.9421971e+00
   2.2339751e+01  -2.7314548e+01   2.5000000e+02  -5.1097915e+00   1.8319008e+00  -6.6011329e+00
   2.2484736e+01  -2.7318972e+01   2.5000000e+02  -5.2889704e+00   2.3493028e+00  -6.2234770e+00
   2.2629772e+01  -2.7316086e+01   2.5000000e+02  -5.4547523e+00   2.8291642e+00  -5.8175656e+00
   2.2774382e+01  -2.7305899e+01   2.5000000e+02  -5.6067866e+00   3.2655071e+00  -5.3930532e+00
   2.2918092e+01  -2.7288447e+01   2.5000000e+02  -5.7439288e+00   3.6541233e+00  -4.9603312e+00
   2.3060430e+01  -2.7263784e+01   2.5000000e+02  -5.8644480e+00   3.9927831e+00  -4.5298696e+00
   2.3200932e+01  -2.7231994e+01   2.5000000e+02  -5.9663599e+00   4.2812351e+00  -4.1114134e+00
   2.3339140e+01  -2.7193180e+01   2.5000000e+02  -6.0477835e+00   4.5209077e+00  -3.7134230e+00
   2.3474603e+01  -2.7147468e+01   2.5000000e+02  -6.1072951e+00   4.7144627e+00  -3.3426614e+00
   2.3606883e+01  -2.7095010e+01   2.5000000e+02  -6.1442102e+00   4.8652830e+00  -3.0040384e+00
   2.3735554e+01  -2.7035976e+01   2.5000000e+02  -6.1587362e+00   4.9769808e+00  -2.7007962e+00
   2.3860202e+01  -2.6970559e+01   2.5000000e+02  -6.1520032e+00   5.0530446e+00  -2.4348183e+00
   2.3980429e+01  -2.6898972e+01   2.5000000e+02  -6.1259669e+00   5.0966454e+00  -2.2070516e+00
   2.4095855e+01  -2.6821447e+01   2.5000000e+02  -6.0832094e+00   5.1105939e+00  -2.0179264e+00
   2.4206117e+01  -2.6738237e+01   2.5000000e+02  -6.0266742e+00   5.0974133e+00  -1.8677040e+00
   2.4310869e+01  -2.6649610e+01   2.5000000e+02  -5.9593582e+00   5.0594755e+00  -1.7567391e+00
   2.4409789e+01  -2.6555852e+01   2.5000000e+02  -5.8840135e+00   4.9991461e+00  -1.6855353e+00
   2.4502573e+01  -2.6457265e+01   2.5000000e+02  -5.8028654e+00   4.9188925e+00  -1.6547660e+00
   2.4588941e+01  -2.6354166e+01   2.5000000e+02  -5.7173858e+00   4.8213274e+00  -1.6651395e+00
   2.4668634e+01  -2.6246885e+01   2.5000000e+02  -5.6281287e+00   4.7091783e+00  -1.7172508e+00
   2.4741417e+01  -2.6135763e+01   2.5000000e+02  -5.5346481e+00   4.5851828e+00  -1.8113765e+00
   2.4807080e+01  -2.6021155e+01   2.5000000e+02  -5.4355072e+00   4.4519253e+00  -1.9472606e+00
   2.4865436e+01  -2.5903424e+01   2.5000000e+02  -5.3283647e+00   4.3116254e+00  -2.1239621e+00
   2.4916324e+01  -2.5782941e+01   2.5000000e+02  -5.2101560e+00   4.1658996e+00  -2.3396893e+00
   2.4959606e+01  -2.5660088e+01   2.5000000e+02  -5.0773510e+00   4.0155315e+00  -2.5916951e+00
   2.4995171e+01  -2.5535249e+01   2.5000000e+02  -4.9262579e+00   3.8602610e+00  -2.8762436e+00
   2.5022932e+01  -2.5408816e+01   2.5000000e+02  -4.7533658e+00   3.6986635e+00  -3.1886245e+00
   2.5042827e+01  -2.5281183e+01   2.5000000e+02  -4.5556548e+00   3.5281253e+00  -3.5232657e+00
   2.5054820e+01  -2.5152747e+01   2.5000000e+02  -4.3308497e+00   3.3449605e+00  -3.8738808e+00
   2.5058898e+01  -2.5023907e+01   2.5000000e+02  -4.0775596e+00   3.1446689e+00  -4.2336642e+00
   2.5055074e+01  -2.4895061e+01   2.5000000e+02  -3.7953046e+00   2.9223146e+00  -4.5954455e+00
   2.5043384e+01  -2.4766605e+01   2.5000000e+02  -3.4844502e+00   2.6729947e+00  -4.9517964e+00
   2.5023889e+01  -2.4638934e+01   2.5000000e+02  -3.1461266e+00   2.3923450e+00  -5.2950425e+00
   2.4996672e+01  -2.4512440e+01   2.5000000e+02  -2.7821750e+00   2.0770111e+00  -5.6172646e+00
   2.4961839e+01  -2.4387508e+01   2.5000000e+02  -2.3951771e+00   1.7250268e+00  -5.9103223e+00
   2.4919517e+01  -2.4264519e+01   2.5000000e+02  -1.9885679e+00   1.3360734e+00  -6.1659887e+00
   2.4869858e+01  -2.4143846e+01   2.5000000e+02  -1.5667549e+00   9.1156765e-01  -6.3762426e+00
   2.4813030e+01  -2.4025855e+01   2.5000000e+02  -1.1351392e+00   4.5458016e-01  -6.5337335e+00
   2.4749225e+01  -2.3910902e+01   2.5000000e+02  -7.0001719e-01  -3.0383231e-02  -6.6322731e+00
   2.4678653e+01  -2.3799333e+01   2.5000000e+02  -2.6828186e-01  -5.3772155e-01  -6.6673109e+00
   2.4601542e+01  -2.3691484e+01   2.5000000e+02   1.5299776e-01  -1.0611307e+00  -6.6362383e+00
   2.4518139e+01  -2.3587677e+01   2.5000000e+02   5.5705158e-01  -1.5940127e+00  -6.5384691e+00
   2.4428707e+01  -2.3488223e+01   2.5000000e+02   9.3783965e-01  -2.1298351e+00  -6.3753077e+00
   2.4333526e+01  -2.3393420e+01   2.5000000e+02   1.2903706e+00  -2.6624322e+00  -6.1496433e+00
   2.4232891e+01  -2.3303550e+01   2.5000000e+02   1.6108905e+00  -3.1862357e+00  -5.8655522e+00
   2.4127110e+01  -2.3218880e+01   2.5000000e+02   1.8969454e+00  -3.6964137e+00  -5.5278944e+00
   2.4016507e+01  -2.3139661e+01   2.5000000e+02   2.1473585e+00  -4.1889309e+00  -5.1419586e+00
   2.3901417e+01  -2.3066128e+01   2.5000000e+02   2.3621960e+00  -4.6605645e+00  -4.7131696e+00
   2.3782186e+01  -2.2998499e+01   2.5000000e+02   2.5427170e+00  -5.1088569e+00  -4.2468655e+00
   2.3659173e+01  -2.2936974e+01   2.5000000e+02   2.6913240e+00  -5.5320172e+00  -3.7481431e+00
   2.3532744e+01  -2.2881734e+01   2.5000000e+02   2.8115124e+00  -5.9288095e+00  -3.2217312e+00
   2.3403276e+01  -2.2832943e+01   2.5000000e+02   2.9077677e+00  -6.2983899e+00  -2.6719407e+00
   2.3271152e+01  -2.2790743e+01   2.5000000e+02   2.9854094e+00  -6.6401702e+00  -2.1026115e+00
   2.3136763e+01  -2.2755261e+01   2.5000000e+02   3.0503790e+00  -6.9536527e+00  -1.5171513e+00
   2.3000505e+01  -2.2726598e+01   2.5000000e+02   3.1089536e+00  -7.2383052e+00  -9.1854956e-01
   2.2862778e+01  -2.2704841e+01   2.5000000e+02   3.1674774e+00  -7.4934096e+00  -3.0950252e-01
   2.2723987e+01  -2.2690053e+01   2.5000000e+02   3.2320589e+00  -7.7179311e+00   3.0745323e-01
   2.2584540e+01  -2.2682277e+01   2.5000000e+02   3.3083390e+00  -7.9103906e+00   9.2970557e-01
   2.2444845e+01  -2.2681537e+01   2.5000000e+02   3.4013136e+00  -8.0687843e+00   1.5542549e+00
   2.2305312e+01  -2.2687833e+01   2.5000000e+02   3.5151925e+00  -8.1905929e+00   2.1773131e+00
   2.2166349e+01  -2.2701149e+01   2.5000000e+02   3.6533504e+00  -8.2729386e+00   2.7938578e+00
   2.2028364e+01  -2.2721445e+01   2.5000000e+02   3.8182438e+00  -8.3129296e+00   3.3972451e+00
   2.1891764e+01  -2.2748660e+01   2.5000000e+02   4.0113592e+00  -8.3081752e+00   3.9789615e+00
   2.1756948e+01  -2.2782716e+01   2.5000000e+02   4.2331495e+00  -8.2574028e+00   4.5286599e+00
   2.1624315e+01  -2.2823512e+01   2.5000000e+02   4.4828938e+00  -8.1610695e+00   5.0344724e+00
   2.1494256e+01  -2.2870928e+01   2.5000000e+02   4.7585960e+00  -8.0218161e+00   5.4836917e+00
   2.1367156e+01  -2.2924823e+01   2.5000000e+02   5.0568718e+00  -7.8446564e+00   5.8636614e+00
   2.1243394e+01  -2.2985041e+01   2.5000000e+02   5.3729270e+00  -7.6368314e+00   6.1627477e+00
   2.1123337e+01  -2.3051401e+01   2.5000000e+02   5.7005573e+00  -7.4073489e+00   6.3713454e+00
   2.1007347e+01  -2.3123709e+01   2.5000000e+02   6.0323332e+00  -7.1662979e+00   6.4825470e+00
   2.0895771e+01  -2.3201751e+01   2.5000000e+02   6.3598201e+00  -6.9240405e+00   6.4926936e+00
   2.0788949e+01  -2.3285295e+01   2.5000000e+02   6.6739213e+00  -6.6904485e+00   6.4015265e+00
   2.0687205e+01  -2.3374093e+01   2.5000000e+02   6.9653051e+00  -6.4742232e+00   6.2121388e+00
   2.0590851e+01  -2.3467881e+01   2.5000000e+02   7.2248740e+00  -6.2824069e+00   5.9306691e+00
   2.0500185e+01  -2.3566380e+01   2.5000000e+02   7.4442628e+00  -6.1200648e+00   5.5658388e+00
   2.0415492e+01  -2.3669296e+01   2.5000000e+02   7.6163118e+00  -5.9901477e+00   5.1283447e+00
   2.0337036e+01  -2.3776322e+01   2.5000000e+02   7.7354610e+00  -5.8935000e+00   4.6301596e+00
   2.0265068e+01  -2.3887135e+01   2.5000000e+02   7.7980004e+00  -5.8290438e+00   4.0837624e+00
   1.9872619e+01  -2.4456908e+01   2.5000000e+02   7.2201121e+00  -5.6800945e+00   1.6609254e+00
   1.9843646e+01  -2.4582259e+01   2.5000000e+02   6.9760152e+00  -5.7407726e+00   1.0499712e+00
   1.9821870e+01  -2.4708814e+01   2.5000000e+02   6.6883552e+00  -5.8036270e+00   4.4904671e-01
   1.9807371e+01  -2.4836229e+01   2.5000000e+02   6.3600982e+00  -5.8655263e+00  -1.3807692e-01
   1.9800211e+01  -2.4964157e+01   2.5000000e+02   5.9944904e+00  -5.9239726e+00  -7.0789772e-01
   1.9800432e+01  -2.5092250e+01   2.5000000e+02   5.5952308e+00  -5.9770222e+00  -1.2572189e+00
   1.9808056e+01  -2.5220157e+01   2.5000000e+02   5.1665941e+00  -6.0231564e+00  -1.7833255e+00
   1.9823087e+01  -2.5347527e+01   2.5000000e+02   4.7134160e+00  -6.0611122e+00  -2.2842735e+00
   1.9845505e+01  -2.5474009e+01   2.5000000e+02   4.2409433e+00  -6.0896669e+00  -2.7591236e+00
   1.9875274e+01  -2.5599254e+01   2.5000000e+02   3.7545545e+00  -6.1074060e+00  -3.2081359e+00
   1.9912332e+01  -2.5722915e+01   2.5000000e+02   3.2594150e+00  -6.1124804e+00  -3.6327148e+00
   1.9956600e+01  -2.5844648e+01   2.5000000e+02   2.7601271e+00  -6.1024093e+00  -4.0352275e+00
   2.0007978e+01  -2.5964113e+01   2.5000000e+02   2.2604565e+00  -6.0739638e+00  -4.4185725e+00
   2.0066343e+01  -2.6080976e+01   2.5000000e+02   1.7631975e+00  -6.0231822e+00  -4.7856149e+00
   2.0131552e+01  -2.6194910e+01   2.5000000e+02   1.2702239e+00  -5.9455427e+00  -5.1385965e+00
   2.0203442e+01  -2.6305592e+01   2.5000000e+02   7.8273539e-01  -5.8362868e+00  -5.4786098e+00
   2.0281830e+01  -2.6412711e+01   2.5000000e+02   3.0159144e-01  -5.6908450e+00  -5.8052695e+00
   2.0366512e+01  -2.6515963e+01   2.5000000e+02  -1.7225810e-01  -5.5053000e+00  -6.1166351e+00
   2.0457264e+01  -2.6615054e+01   2.5000000e+02  -6.3743384e-01  -5.2767846e+00  -6.4094194e+00
   2.0553845e+01  -2.6709702e+01   2.5000000e+02  -1.0919334e+00  -5.0037340e+00  -6.6794092e+00
   2.0655992e+01  -2.6799637e+01   2.5000000e+02  -1.5331184e+00  -4.6859683e+00  -6.9219511e+00
   2.0763428e+01  -2.6884600e+01   2.5000000e+02  -1.9579030e+00  -4.3245782e+00  -7.1324530e+00
   2.0875855e+01  -2.6964348e+01   2.5000000e+02  -2.3630864e+00  -3.9217111e+00  -7.3066844e+00
   2.0992960e+01  -2.7038650e+01   2.5000000e+02  -2.7457231e+00  -3.4803074e+00  -7.4409542e+00
   2.1114417e+01  -2.7107293e+01   2.5000000e+02  -3.1034917e+00  -3.0038760e+00  -7.5320917e+00
   2.1239880e+01  -2.7170077e+01   2.5000000e+02  -3.4349198e+00  -2.4964178e+00  -7.5773471e+00
   2.1368996e+01  -2.7226821e+01   2.5000000e+02  -3.7395400e+00  -1.9623821e+00  -7.5743133e+00
   2.1501393e+01  -2.7277360e+01   2.5000000e+02  -4.0178612e+00  -1.4067966e+00  -7.5209016e+00
   2.1636693e+01  -2.7321546e+01   2.5000000e+02  -4.2712800e+00  -8.3533568e-01  -7.4154599e+00
   2.1774505e+01  -2.7359252e+01   2.5000000e+02  -4.5018984e+00  -2.5442793e-01  -7.2569639e+00
   2.1914431e+01  -2.7390367e+01   2.5000000e+02  -4.7122890e+00   3.2873601e-01  -7.0453232e+00
   2.2056064e+01  -2.7414799e+01   2.5000000e+02  -4.9052344e+00   9.0626991e-01  -6.7816946e+00
   2.2198993e+01  -2.7432479e+01   2.5000000e+02  -5.0834514e+00   1.4697989e+00  -6.4687719e+00
   2.2342800e+01  -2.7443353e+01   2.5000000e+02  -5.2492889e+00   2.0107482e+00  -6.1110624e+00
   2.2487067e+01  -2.7447391e+01   2.5000000e+02  -5.4044853e+00   2.5208167e+00  -5.7149601e+00
   2.2631371e+01  -2.7444580e+01   2.5000000e+02  -5.5499614e+00   2.9924808e+00  -5.2887109e+00
   2.2775291e+01  -2.7434929e+01   2.5000000e+02  -5.6857399e+00   3.4195767e+00  -4.8420682e+00
   2.2918408e+01  -2.7418466e+01   2.5000000e+02  -5.8109786e+00   3.7977619e+00  -4.3857555e+00
   2.3060304e+01  -2.7395238e+01   2.5000000e+02  -5.9241365e+00   4.1247884e+00  -3.9307489e+00
   2.3200566e+01  -2.7365315e+01   2.5000000e+02  -6.0232509e+00   4.4005318e+00  -3.4874644e+00
   2.3338786e+01  -2.7328783e+01   2.5000000e+02  -6.1062700e+00   4.6267293e+00  -3.0650901e+00
   2.3474565e+01  -2.7285749e+01   2.5000000e+02  -6.1713975e+00   4.8065291e+00  -2.6710567e+00
   2.3607511e+01  -2.7236338e+01   2.5000000e+02  -6.2173810e+00   4.9439195e+00  -2.3108443e+00
   2.3737242e+01  -2.7180694e+01   2.5000000e+02  -6.2437150e+00   5.0431871e+00  -1.9880276e+00
   2.3863387e+01  -2.7118979e+01   2.5000000e+02  -6.2507296e+00   5.1084772e+00  -1.7045589e+00
   2.3985587e+01  -2.7051372e+01   2.5000000e+02  -6.2395668e+00   5.1435186e+00  -1.4611819e+00
   2.4103496e+01  -2.6978068e+01   2.5000000e+02  -6.2120594e+00   5.1515152e+00  -1.2578808e+00
   2.4216785e+01  -2.6899280e+01   2.5000000e+02  -6.1705401e+00   5.1351806e+00  -1.0942574e+00
   2.4325137e+01  -2.6815234e+01   2.5000000e+02  -6.1176015e+00   5.0968623e+00  -9.6988596e-01
   2.4428253e+01  -2.6726171e+01   2.5000000e+02  -6.0558423e+00   5.0387066e+00  -8.8446214e-01
   2.4525851e+01  -2.6632348e+01   2.5000000e+02  -5.9876199e+00   4.9628124e+00  -8.3787109e-01
   2.4617666e+01  -2.6534033e+01   2.5000000e+02  -5.9148233e+00   4.8713419e+00  -8.3017493e-01
   2.4703453e+01  -2.6431505e+01   2.5000000e+02  -5.8386931e+00   4.7665675e+00  -8.6149248e-01
   2.4782984e+01  -2.6325057e+01   2.5000000e+02  -5.7596995e+00   4.6508614e+00  -9.3185461e-01
   2.4856053e+01  -2.6214991e+01   2.5000000e+02  -5.6774797e+00   4.5266199e+00  -1.0410434e+00
   2.4922472e+01  -2.6101616e+01   2.5000000e+02  -5.5908467e+00   4.3961484e+00  -1.1884639e+00
   2.4982074e+01  -2.5985254e+01   2.5000000e+02  -5.4978777e+00   4.2615062e+00  -1.3729791e+00
   2.5034713e+01  -2.5866231e+01   2.5000000e+02  -5.3960520e+00   4.1243195e+00  -1.5928446e+00
   2.5080263e+01  -2.5744879e+01   2.5000000e+02  -5.2824531e+00   3.9855860e+00  -1.8456447e+00
   2.5118620e+01  -2.5621539e+01   2.5000000e+02  -5.1540110e+00   3.8454862e+00  -2.1282604e+00
   2.5149700e+01  -2.5496552e+01   2.5000000e+02  -5.0077415e+00   3.7032257e+00  -2.4369413e+00
   2.5173439e+01  -2.5370266e+01   2.5000000e+02  -4.8409902e+00   3.5569553e+00  -2.7673612e+00
   2.5189795e+01  -2.5243029e+01   2.5000000e+02  -4.6516105e+00   3.4037742e+00  -3.1147489e+00
   2.5198747e+01  -2.5115193e+01   2.5000000e+02  -4.4380768e+00   3.2398603e+00  -3.4740021e+00
   2.5200293e+01  -2.4987107e+01   2.5000000e+02  -4.1994847e+00   3.0607027e+00  -3.8398119e+00
   2.5194453e+01  -2.4859124e+01   2.5000000e+02  -3.9355027e+00   2.8614486e+00  -4.2066610e+00
   2.5181265e+01  -2.4731592e+01   2.5000000e+02  -3.6462551e+00   2.6372985e+00  -4.5688088e+00
   2.5160787e+01  -2.4604858e+01   2.5000000e+02  -3.3322691e+00   2.3839414e+00  -4.9201478e+00
   2.5133098e+01  -2.4479266e+01   2.5000000e+02  -2.9945029e+00   2.0979615e+00  -5.2540735e+00
   2.5098292e+01  -2.4355155e+01   2.5000000e+02  -2.6344710e+00   1.7771719e+00  -5.5634491e+00
   2.5056485e+01  -2.4232861e+01   2.5000000e+02  -2.2544840e+00   1.4208574e+00  -5.8406812e+00
   2.5007809e+01  -2.4112712e+01   2.5000000e+02  -1.8578445e+00   1.0298625e+00  -6.0780429e+00
   2.4952412e+01  -2.3995031e+01   2.5000000e+02  -1.4489763e+00   6.0656135e-01  -6.2681355e+00
   2.4890461e+01  -2.3880133e+01   2.5000000e+02  -1.0333754e+00   1.5468928e-01  -6.4044388e+00
   2.4822137e+01  -2.3768323e+01   2.5000000e+02  -6.1734811e-01  -3.2093723e-01  -6.4818391e+00
   2.4747639e+01  -2.3659901e+01   2.5000000e+02  -2.0763320e-01  -8.1472686e-01  -6.4969934e+00
   2.4667178e+01  -2.3555153e+01   2.5000000e+02   1.8910301e-01  -1.3207007e+00  -6.4484898e+00
   2.4580981e+01  -2.3454357e+01   2.5000000e+02   5.6668589e-01  -1.8327944e+00  -6.3367740e+00
   2.4489288e+01  -2.3357781e+01   2.5000000e+02   9.1978576e-01  -2.3451539e+00  -6.1639073e+00
   2.4392353e+01  -2.3265678e+01   2.5000000e+02   1.2441246e+00  -2.8523709e+00  -5.9332097e+00
   2.4290440e+01  -2.3178292e+01   2.5000000e+02   1.5365578e+00  -3.3496388e+00  -5.6488941e+00
   2.4183827e+01  -2.3095853e+01   2.5000000e+02   1.7950636e+00  -3.8328618e+00  -5.3157153e+00
   2.4072800e+01  -2.3018576e+01   2.5000000e+02   2.0187148e+00  -4.2987261e+00  -4.9386701e+00
   2.3957657e+01  -2.2946665e+01   2.5000000e+02   2.2076317e+00  -4.7446825e+00  -4.5227770e+00
   2.3838706e+01  -2.2880307e+01   2.5000000e+02   2.3629681e+00  -5.1689171e+00  -4.0728725e+00
   2.3716262e+01  -2.2819677e+01   2.5000000e+02   2.4869101e+00  -5.5702507e+00  -3.5934666e+00
   2.3590649e+01  -2.2764933e+01   2.5000000e+02   2.5826460e+00  -5.9480002e+00  -3.0886197e+00
   2.3462196e+01  -2.2716217e+01   2.5000000e+02   2.6543060e+00  -6.3018136e+00  -2.5618641e+00
   2.3331240e+01  -2.2673656e+01   2.5000000e+02   2.7068310e+00  -6.6314797e+00  -2.0161941e+00
   2.3198125e+01  -2.2637362e+01   2.5000000e+02   2.7457836e+00  -6.9367622e+00  -1.4540960e+00
   2.3063198e+01  -2.2607429e+01   2.5000000e+02   2.7771020e+00  -7.2172626e+00  -8.7760608e-01
   2.2926808e+01  -2.2583934e+01   2.5000000e+02   2.8068317e+00  -7.4722950e+00  -2.8842861e-01
   2.2789312e+01  -2.2566939e+01   2.5000000e+02   2.8408666e+00  -7.7007670e+00   3.1187570e-01
   2.2651066e+01  -2.2556488e+01   2.5000000e+02   2.8847210e+00  -7.9011062e+00   9.2172166e-01
   2.2512428e+01  -2.2552608e+01   2.5000000e+02   2.9433581e+00  -8.0711869e+00   1.5392148e+00
   2.2373758e+01  -2.2555309e+01   2.5000000e+02   3.0210793e+00  -8.2083251e+00   2.1618122e+00
   2.2235415e+01  -2.2564584e+01   2.5000000e+02   3.1214684e+00  -8.3093785e+00   2.7859467e+00
   2.2097758e+01  -2.2580409e+01   2.5000000e+02   3.2473670e+00  -8.3709872e+00   3.4066329e+00
   2.1961144e+01  -2.2602743e+01   2.5000000e+02   3.4008609e+00  -8.3899760e+00   4.0171646e+00
   2.1825929e+01  -2.2631528e+01   2.5000000e+02   3.5832462e+00  -8.3638876e+00   4.6089679e+00
   2.1692463e+01  -2.2666689e+01   2.5000000e+02   3.7949666e+00  -8.2915733e+00   5.1717323e+00
   2.1561096e+01  -2.2708134e+01   2.5000000e+02   4.0355105e+00  -8.1737307e+00   5.6937726e+00
   2.1432169e+01  -2.2755756e+01   2.5000000e+02   4.3033051e+00  -8.0132643e+00   6.1627219e+00
   2.1306022e+01  -2.2809431e+01   2.5000000e+02   4.5955946e+00  -7.8153945e+00   6.5663309e+00
   2.1182986e+01  -2.2869017e+01   2.5000000e+02   4.9083687e+00  -7.5874524e+00   6.8934003e+00
   2.1063386e+01  -2.2934361e+01   2.5000000e+02   5.2363881e+00  -7.3384088e+00   7.1345544e+00
   2.0947538e+01  -2.3005290e+01   2.5000000e+02   5.5732224e+00  -7.0782140e+00   7.2829184e+00
   2.0835752e+01  -2.3081620e+01   2.5000000e+02   5.9114511e+00  -6.8170662e+00   7.3344680e+00
   2.0728326e+01  -2.3163150e+01   2.5000000e+02   6.2428831e+00  -6.5646969e+00   7.2882329e+00
   2.0625550e+01  -2.3249666e+01   2.5000000e+02   6.5588908e+00  -6.3297836e+00   7.1462121e+00
   2.0527703e+01  -2.3340941e+01   2.5000000e+02   6.8507881e+00  -6.1194976e+00   6.9131656e+00
   2.0435052e+01  -2.3436734e+01   2.5000000e+02   7.1102501e+00  -5.9392119e+00   6.5962762e+00
   2.0347853e+01  -2.3536793e+01   2.5000000e+02   7.3297581e+00  -5.7923602e+00   6.2046725e+00
   2.0266347e+01  -2.3640853e+01   2.5000000e+02   7.5029970e+00  -5.6804147e+00   5.7489021e+00
   2.0190764e+01  -2.3748638e+01   2.5000000e+02   7.6251823e+00  -5.6030035e+00   5.2402832e+00
   2.0121319e+01  -2.3859862e+01   2.5000000e+02   7.6932393e+00  -5.5581187e+00   4.6902534e+00
   2.0058212e+01  -2.3974230e+01   2.5000000e+02   7.7058036e+00  -5.5424274e+00   4.1097400e+00
   2.0001628e+01  -2.4091435e+01   2.5000000e+02   7.6630394e+00  -5.5516464e+00   3.5086740e+00
   1.9951736e+01  -2.4211165e+01   2.5000000e+02   7.5663152e+00  -5.5809521e+00   2.8956277e+00
   1.9908688e+01  -2.4333099e+01   2.5000000e+02   7.4178038e+00  -5.6253668e+00   2.2777569e+00
   1.9658258e+01  -2.4964135e+01   2.5000000e+02   5.9334397e+00  -5.7806034e+00  -1.6523823e-01
   1.9658331e+01  -2.5092538e+01   2.5000000e+02   5.5465613e+00  -5.8483399e+00  -7.0587313e-01
   1.9665471e+01  -2.5220779e+01   2.5000000e+02   5.1296597e+00  -5.9090226e+00  -1.2233318e+00
   1.9679684e+01  -2.5348537e+01   2.5000000e+02   4.6874174e+00  -5.9615804e+00  -1.7152558e+00
   1.9700956e+01  -2.5475495e+01   2.5000000e+02   4.2250647e+00  -6.0050942e+00  -2.1802711e+00
   1.9729257e+01  -2.5601333e+01   2.5000000e+02   3.7481414e+00  -6.0385955e+00  -2.6182162e+00
   1.9764537e+01  -2.5725737e+01   2.5000000e+02   3.2621068e+00  -6.0608393e+00  -3.0302371e+00
   1.9806729e+01  -2.5848391e+01   2.5000000e+02   2.7719850e+00  -6.0700834e+00  -3.4186662e+00
   1.9855750e+01  -2.5968986e+01   2.5000000e+02   2.2819871e+00  -6.0639157e+00  -3.7867238e+00
   1.9911494e+01  -2.6087216e+01   2.5000000e+02   1.7953012e+00  -6.0391735e+00  -4.1379770e+00
   1.9973842e+01  -2.6202779e+01   2.5000000e+02   1.3140317e+00  -5.9920035e+00  -4.4757773e+00
   2.0042654e+01  -2.6315381e+01   2.5000000e+02   8.3932443e-01  -5.9180655e+00  -4.8026241e+00
   2.0117773e+01  -2.6424733e+01   2.5000000e+02   3.7169122e-01  -5.8128742e+00  -5.1196960e+00
   2.0199024e+01  -2.6530553e+01   2.5000000e+02  -8.8576621e-02  -5.6722188e+00  -5.4265876e+00
   2.0286214e+01  -2.6632570e+01   2.5000000e+02  -5.4098815e-01  -5.4925819e+00  -5.7213199e+00
   2.0379135e+01  -2.6730519e+01   2.5000000e+02  -9.8448934e-01  -5.2714774e+00  -6.0006229e+00
   2.0477561e+01  -2.6824146e+01   2.5000000e+02  -1.4172980e+00  -5.0076352e+00  -6.2603656e+00
   2.0581251e+01  -2.6913208e+01   2.5000000e+02  -1.8369254e+00  -4.7010040e+00  -6.4960663e+00
   2.0689946e+01  -2.6997472e+01   2.5000000e+02  -2.2403738e+00  -4.3526088e+00  -6.7033135e+00
   2.0803374e+01  -2.7076718e+01   2.5000000e+02  -2.6244838e+00  -3.9642966e+00  -6.8780524e+00
   2.0921248e+01  -2.7150738e+01   2.5000000e+02  -2.9863059e+00  -3.5384966e+00  -7.0166635e+00
   2.1043269e+01  -2.7219339e+01   2.5000000e+02  -3.3234557e+00  -3.0780379e+00  -7.1158980e+00
   2.1169124e+01  -2.7282339e+01   2.5000000e+02  -3.6343519e+00  -2.5861107e+00  -7.1727461e+00
   2.1298486e+01  -2.7339571e+01   2.5000000e+02  -3.9183623e+00  -2.0663324e+00  -7.1843190e+00
   2.1431022e+01  -2.7390886e+01   2.5000000e+02  -4.1758397e+00  -1.5228655e+00  -7.1478356e+00
   2.1566384e+01  -2.7436147e+01   2.5000000e+02  -4.4080287e+00  -9.6062590e-01  -7.0607391e+00
   2.1704218e+01  -2.7475234e+01   2.5000000e+02  -4.6169532e+00  -3.8538274e-01  -6.9209240e+00
   2.1844161e+01  -2.7508043e+01   2.5000000e+02  -4.8052294e+00   1.9616310e-01  -6.7270508e+00
   2.1985845e+01  -2.7534487e+01   2.5000000e+02  -4.9758503e+00   7.7641980e-01  -6.4789007e+00
   2.2128894e+01  -2.7554495e+01   2.5000000e+02  -5.1319237e+00   1.3470255e+00  -6.1777477e+00
   2.2272929e+01  -2.7568015e+01   2.5000000e+02  -5.2763956e+00   1.8991330e+00  -5.8266736e+00
   2.2417568e+01  -2.7575011e+01   2.5000000e+02  -5.4117585e+00   2.4238103e+00  -5.4308162e+00
   2.2562425e+01  -2.7575463e+01   2.5000000e+02  -5.5397976e+00   2.9125749e+00  -4.9974515e+00
   2.2707117e+01  -2.7569371e+01   2.5000000e+02  -5.6614203e+00   3.3580376e+00  -4.5358048e+00
   2.2851258e+01  -2.7556750e+01   2.5000000e+02  -5.7765832e+00   3.7544748e+00  -4.0566616e+00
   2.2994466e+01  -2.7537635e+01   2.5000000e+02  -5.8843632e+00   4.0983123e+00  -3.5716516e+00
   2.3136361e+01  -2.7512076e+01   2.5000000e+02  -5.9831430e+00   4.3883221e+00  -3.0924430e+00
   2.3276567e+01  -2.7480142e+01   2.5000000e+02  -6.0708953e+00   4.6255398e+00  -2.6298709e+00
   2.3414714e+01  -2.7441917e+01   2.5000000e+02  -6.1455136e+00   4.8128922e+00  -2.1932340e+00
   2.3550439e+01  -2.7397502e+01   2.5000000e+02  -6.2051351e+00   4.9546345e+00  -1.7898216e+00
   2.3683386e+01  -2.7347016e+01   2.5000000e+02  -6.2484102e+00   5.0557133e+00  -1.4247539e+00
   2.3813207e+01  -2.7290592e+01   2.5000000e+02  -6.2746840e+00   5.1211808e+00  -1.1011256e+00
   2.3939565e+01  -2.7228379e+01   2.5000000e+02  -6.2840743e+00   5.1557522e+00  -8.2032565e-01
   2.4062135e+01  -2.7160542e+01   2.5000000e+02  -6.2774472e+00   5.1635394e+00  -5.8248866e-01
   2.4180600e+01  -2.7087259e+01   2.5000000e+02  -6.2563100e+00   5.1479663e+00  -3.8700201e-01
   2.4294660e+01  -2.7008723e+01   2.5000000e+02  -6.2226425e+00   5.1118278e+00  -2.3287018e-01
   2.4404026e+01  -2.6925139e+01   2.5000000e+02  -6.1786907e+00   5.0574381e+00  -1.1906722e-01
   2.4508422e+01  -2.6836727e+01   2.5000000e+02  -6.1267488e+00   4.9868144e+00  -4.4701753e-02
   2.4607590e+01  -2.6743716e+01   2.5000000e+02  -6.0689399e+00   4.9018429e+00  -9.0935523e-03
   2.4701285e+01  -2.6646349e+01   2.5000000e+02  -6.0070228e+00   4.8044069e+00  -1.1751118e-02
   2.4789280e+01  -2.6544879e+01   2.5000000e+02  -5.9422254e+00   4.6964515e+00  -5.2279399e-02
   2.4871364e+01  -2.6439568e+01   2.5000000e+02  -5.8751250e+00   4.5799967e+00  -1.3026755e-01
   2.4947340e+01  -2.6330687e+01   2.5000000e+02  -5.8055816e+00   4.4571073e+00  -2.4515867e-01
   2.5017033e+01  -2.6218517e+01   2.5000000e+02  -5.7327360e+00   4.3298129e+00  -3.9608307e-01
   2.5080283e+01  -2.6103346e+01   2.5000000e+02  -5.6550677e+00   4.2000176e+00  -5.8178721e-01
   2.5136947e+01  -2.5985467e+01   2.5000000e+02  -5.5705140e+00   4.0693704e+00  -8.0055252e-01
   2.5186903e+01  -2.5865180e+01   2.5000000e+02  -5.4766419e+00   3.9391099e+00  -1.0501341e+00
   2.5230044e+01  -2.5742792e+01   2.5000000e+02  -5.3708464e+00   3.8099067e+00  -1.3277875e+00
   2.5266284e+01  -2.5618612e+01   2.5000000e+02  -5.2505559e+00   3.6816900e+00  -1.6303132e+00
   2.5295552e+01  -2.5492953e+01   2.5000000e+02  -5.1134237e+00   3.5535206e+00  -1.9541571e+00
   2.5317797e+01  -2.5366131e+01   2.5000000e+02  -4.9574822e+00   3.4235055e+00  -2.2955081e+00
   2.5332986e+01  -2.5238464e+01   2.5000000e+02  -4.7812295e+00   3.2888012e+00  -2.6504259e+00
   2.5341104e+01  -2.5110271e+01   2.5000000e+02  -4.5836371e+00   3.1457108e+00  -3.0149352e+00
   2.5342152e+01  -2.4981871e+01   2.5000000e+02  -4.3640751e+00   2.9898792e+00  -3.3850651e+00
   2.5336150e+01  -2.4853584e+01   2.5000000e+02  -4.1221928e+00   2.8165742e+00  -3.7567735e+00
   2.5323136e+01  -2.4725725e+01   2.5000000e+02  -3.8577862e+00   2.6210252e+00  -4.1258012e+00
   2.5303161e+01  -2.4598612e+01   2.5000000e+02  -3.5707528e+00   2.3988127e+00  -4.4874276e+00
   2.5276298e+01  -2.4472555e+01   2.5000000e+02  -3.2611580e+00   2.1462214e+00  -4.8362292e+00
   2.5242631e+01  -2.4347866e+01   2.5000000e+02  -2.9294511e+00   1.8605880e+00  -5.1659436e+00
   2.5202263e+01  -2.4224848e+01   2.5000000e+02  -2.5767698e+00   1.5405308e+00  -5.4695071e+00
   2.5155311e+01  -2.4103801e+01   2.5000000e+02  -2.2052659e+00   1.1861058e+00  -5.7393231e+00
   2.5101907e+01  -2.3985020e+01   2.5000000e+02  -1.8183277e+00   7.9882658e-01  -5.9677415e+00
   2.5042198e+01  -2.3868793e+01   2.5000000e+02  -1.4206124e+00   3.8156248e-01  -6.1476612e+00
   2.4976345e+01  -2.3755401e+01   2.5000000e+02  -1.0178600e+00  -6.1664275e-02  -6.2731273e+00
   2.4904522e+01  -2.3645119e+01   2.5000000e+02  -6.1651904e-01  -5.2595155e-01  -6.3398014e+00
   2.4826917e+01  -2.3538210e+01   2.5000000e+02  -2.2325841e-01  -1.0058427e+00  -6.3452127e+00
   2.4743728e+01  -2.3434933e+01   2.5000000e+02   1.5550795e-01  -1.4956191e+00  -6.2887820e+00
   2.4655167e+01  -2.3335535e+01   2.5000000e+02   5.1401472e-01  -1.9895938e+00  -6.1716337e+00
   2.4561458e+01  -2.3240254e+01   2.5000000e+02   8.4739652e-01  -2.4823413e+00  -5.9962919e+00
   2.4462834e+01  -2.3149316e+01   2.5000000e+02   1.1518094e+00  -2.9688992e+00  -5.7663213e+00
   2.4359540e+01  -2.3062940e+01   2.5000000e+02   1.4244257e+00  -3.4448916e+00  -5.4859979e+00
   2.4251828e+01  -2.2981331e+01   2.5000000e+02   1.6634070e+00  -3.9066635e+00  -5.1600012e+00
   2.4139963e+01  -2.2904682e+01   2.5000000e+02   1.8678416e+00  -4.3513226e+00  -4.7931825e+00
   2.4024215e+01  -2.2833175e+01   2.5000000e+02   2.0377440e+00  -4.7767757e+00  -4.3903512e+00
   2.3904864e+01  -2.2766980e+01   2.5000000e+02   2.1740601e+00  -5.1816810e+00  -3.9560967e+00
   2.3782195e+01  -2.2706254e+01   2.5000000e+02   2.2787036e+00  -5.5653625e+00  -3.4946098e+00
   2.3656504e+01  -2.2651139e+01   2.5000000e+02   2.3545549e+00  -5.9276388e+00  -3.0095532e+00
   2.3528089e+01  -2.2601767e+01   2.5000000e+02   2.4054406e+00  -6.2686352e+00  -2.5039578e+00
   2.3397254e+01  -2.2558253e+01   2.5000000e+02   2.4360123e+00  -6.5885631e+00  -1.9801867e+00
   2.3264310e+01  -2.2520700e+01   2.5000000e+02   2.4515780e+00  -6.8875064e+00  -1.4399941e+00
   2.3129570e+01  -2.2489197e+01   2.5000000e+02   2.4578736e+00  -7.1652649e+00  -8.8460883e-01
   2.2993353e+01  -2.2463818e+01   2.5000000e+02   2.4607993e+00  -7.4212203e+00  -3.1489947e-01
   2.2855977e+01  -2.2444622e+01   2.5000000e+02   2.4661677e+00  -7.6542593e+00   2.6846765e-01
   2.2717767e+01  -2.2431654e+01   2.5000000e+02   2.4794768e+00  -7.8626968e+00   8.6478259e-01
   2.2579046e+01  -2.2424946e+01   2.5000000e+02   2.5057436e+00  -8.0442520e+00   1.4730772e+00
   2.2440140e+01  -2.2424512e+01   2.5000000e+02   2.5493729e+00  -8.1960409e+00   2.0918176e+00
   2.2301374e+01  -2.2430354e+01   2.5000000e+02   2.6141225e+00  -8.3146501e+00   2.7185693e+00
   2.2163073e+01  -2.2442458e+01   2.5000000e+02   2.7030802e+00  -8.3963168e+00   3.3496363e+00
   2.2025563e+01  -2.2460796e+01   2.5000000e+02   2.8186848e+00  -8.4372479e+00   3.9797214e+00
   2.1889167e+01  -2.2485325e+01   2.5000000e+02   2.9627339e+00  -8.4340792e+00   4.6017225e+00
   2.1754204e+01  -2.2515986e+01   2.5000000e+02   3.1363640e+00  -8.3844254e+00   5.2067023e+00
   2.1620993e+01  -2.2552708e+01   2.5000000e+02   3.3400105e+00  -8.2874417e+00   5.7840666e+00
   2.1489849e+01  -2.2595404e+01   2.5000000e+02   3.5732990e+00  -8.1442947e+00   6.3220524e+00
   2.1361081e+01  -2.2643974e+01   2.5000000e+02   3.8349424e+00  -7.9584300e+00   6.8084097e+00
   2.1234995e+01  -2.2698303e+01   2.5000000e+02   4.1226168e+00  -7.7355808e+00   7.2311939e+00
   2.1111892e+01  -2.2758262e+01   2.5000000e+02   4.4328833e+00  -7.4834919e+00   7.5795865e+00
   2.0992065e+01  -2.2823711e+01   2.5000000e+02   4.7611727e+00  -7.2114003e+00   7.8446052e+00
   2.0875802e+01  -2.2894493e+01   2.5000000e+02   5.1017937e+00  -6.9293819e+00   8.0196318e+00
   2.0763384e+01  -2.2970442e+01   2.5000000e+02   5.4480792e+00  -6.6476438e+00   8.1006972e+00
   2.0655083e+01  -2.3051378e+01   2.5000000e+02   5.7925428e+00  -6.3758693e+00   8.0866021e+00
   2.0551163e+01  -2.3137108e+01   2.5000000e+02   6.1271311e+00  -6.1226842e+00   7.9788412e+00
   2.0451879e+01  -2.3227427e+01   2.5000000e+02   6.4435393e+00  -5.8952613e+00   7.7814129e+00
   2.0357477e+01  -2.3322122e+01   2.5000000e+02   6.7335905e+00  -5.6990698e+00   7.5005155e+00
   2.0268192e+01  -2.3420965e+01   2.5000000e+02   6.9896077e+00  -5.5377407e+00   7.1442311e+00
   2.0184248e+01  -2.3523721e+01   2.5000000e+02   7.2048407e+00  -5.4130526e+00   6.7220423e+00
   2.0105859e+01  -2.3630143e+01   2.5000000e+02   7.3738011e+00  -5.3250125e+00   6.2443460e+00
   2.0033225e+01  -2.3739975e+01   2.5000000e+02   7.4925179e+00  -5.2720209e+00   5.7218779e+00
   1.9966537e+01  -2.3852954e+01   2.5000000e+02   7.5586438e+00  -5.2511426e+00   5.1651103e+00
   1.9905970e+01  -2.3968805e+01   2.5000000e+02   7.5713688e+00  -5.2584103e+00   4.5837867e+00
   1.9851686e+01  -2.4087250e+01   2.5000000e+02   7.5311951e+00  -5.2892032e+00   3.9864749e+00
   1.9803834e+01  -2.4208001e+01   2.5000000e+02   7.4395802e+00  -5.3386035e+00   3.3804241e+00
   1.9762549e+01  -2.4330765e+01   2.5000000e+02   7.2985536e+00  -5.4017269e+00   2.7715643e+00
   1.9727950e+01  -2.4455242e+01   2.5000000e+02   7.1103862e+00  -5.4739787e+00   2.1647441e+00
   1.9700141e+01  -2.4581127e+01   2.5000000e+02   6.8773926e+00  -5.5512382e+00   1.5640508e+00
   1.9679211e+01  -2.4708114e+01   2.5000000e+02   6.6018877e+00  -5.6299614e+00   9.7313967e-01
   1.9665231e+01  -2.4835888e+01   2.5000000e+02   6.2863156e+00  -5.7072012e+00   3.9555335e-01
   1.9561507e+01  -2.5500819e+01   2.5000000e+02   4.1144984e+00  -5.8869583e+00  -1.6825675e+00
   1.9589726e+01  -2.5626946e+01   2.5000000e+02   3.6463964e+00  -5.9329544e+00  -2.1044318e+00
   1.9624627e+01  -2.5751714e+01   2.5000000e+02   3.1695786e+00  -5.9684600e+00  -2.4994077e+00
   1.9666153e+01  -2.5874835e+01   2.5000000e+02   2.6893095e+00  -5.9922630e+00  -2.8698261e+00
   1.9714228e+01  -2.5996026e+01   2.5000000e+02   2.2100691e+00  -6.0025682e+00  -3.2190870e+00
   1.9768761e+01  -2.6115005e+01   2.5000000e+02   1.7352824e+00  -5.9968728e+00  -3.5512193e+00
   1.9829646e+01  -2.6231497e+01   2.5000000e+02   1.2671690e+00  -5.9719495e+00  -3.8702977e+00
   1.9896760e+01  -2.6345231e+01   2.5000000e+02   8.0682573e-01  -5.9239691e+00  -4.1797965e+00
   1.9969966e+01  -2.6455941e+01   2.5000000e+02   3.5448423e-01  -5.8487616e+00  -4.4820427e+00
   2.0049110e+01  -2.6563367e+01   2.5000000e+02  -9.0082520e-02  -5.7421806e+00  -4.7778244e+00
   2.0134023e+01  -2.6667257e+01   2.5000000e+02  -5.2709802e-01  -5.6005059e+00  -5.0662746e+00
   2.0224521e+01  -2.6767366e+01   2.5000000e+02  -9.5634684e-01  -5.4208071e+00  -5.3450195e+00
   2.0320404e+01  -2.6863457e+01   2.5000000e+02  -1.3768748e+00  -5.2011917e+00  -5.6105432e+00
   2.0421461e+01  -2.6955302e+01   2.5000000e+02  -1.7868834e+00  -4.9408811e+00  -5.8586940e+00
   2.0527463e+01  -2.7042683e+01   2.5000000e+02  -2.1838111e+00  -4.6401327e+00  -6.0851364e+00
   2.0638171e+01  -2.7125392e+01   2.5000000e+02  -2.5645962e+00  -4.3000168e+00  -6.2857437e+00
   2.0753330e+01  -2.7203230e+01   2.5000000e+02  -2.9260217e+00  -3.9221682e+00  -6.4567556e+00
   2.0872674e+01  -2.7276011e+01   2.5000000e+02  -3.2651097e+00  -3.5085499e+00  -6.5947773e+00
   2.0995925e+01  -2.7343561e+01   2.5000000e+02  -3.5794437e+00  -3.0613434e+00  -6.6966334e+00
   2.1122795e+01  -2.7405716e+01   2.5000000e+02  -3.8673992e+00  -2.5829702e+00  -6.7591949e+00
   2.1252984e+01  -2.7462327e+01   2.5000000e+02  -4.1282761e+00  -2.0762372e+00  -6.7792349e+00
   2.1386183e+01  -2.7513257e+01   2.5000000e+02  -4.3623203e+00  -1.5445457e+00  -6.7534347e+00
   2.1522075e+01  -2.7558383e+01   2.5000000e+02  -4.5706814e+00  -9.9210382e-01  -6.6785115e+00
   2.1660335e+01  -2.7597595e+01   2.5000000e+02  -4.7553115e+00  -4.2410061e-01  -6.5514750e+00
   2.1800629e+01  -2.7630798e+01   2.5000000e+02  -4.9188293e+00   1.5319558e-01  -6.3699642e+00
   2.1942620e+01  -2.7657911e+01   2.5000000e+02  -5.0643435e+00   7.3245322e-01  -6.1326364e+00
   2.2085964e+01  -2.7678868e+01   2.5000000e+02  -5.1952235e+00   1.3053615e+00  -5.8395715e+00
   2.2230314e+01  -2.7693619e+01   2.5000000e+02  -5.3148318e+00   1.8628717e+00  -5.4926591e+00
   2.2375319e+01  -2.7702127e+01   2.5000000e+02  -5.4262250e+00   2.3955681e+00  -5.0959420e+00
   2.2520628e+01  -2.7704372e+01   2.5000000e+02  -5.5318737e+00   2.8942237e+00  -4.6557885e+00
   2.2665886e+01  -2.7700348e+01   2.5000000e+02  -5.6334269e+00   3.3504435e+00  -4.1808855e+00
   2.2810741e+01  -2.7690065e+01   2.5000000e+02  -5.7315837e+00   3.7573817e+00  -3.6818935e+00
   2.2954841e+01  -2.7673548e+01   2.5000000e+02  -5.8260797e+00   4.1103237e+00  -3.1708442e+00
   2.3097836e+01  -2.7650838e+01   2.5000000e+02  -5.9158031e+00   4.4070582e+00  -2.6602866e+00
   2.3239380e+01  -2.7621989e+01   2.5000000e+02  -5.9990208e+00   4.6479317e+00  -2.1623530e+00
   2.3379131e+01  -2.7587071e+01   2.5000000e+02  -6.0736704e+00   4.8355755e+00  -1.6878797e+00
   2.3516752e+01  -2.7546171e+01   2.5000000e+02  -6.1376777e+00   4.9743729e+00  -1.2457468e+00
   2.3651913e+01  -2.7499386e+01   2.5000000e+02  -6.1892548e+00   5.0697800e+00  -8.4255731e-01
   2.3784289e+01  -2.7446830e+01   2.5000000e+02  -6.2271259e+00   5.1276423e+00  -4.8259454e-01
   2.3913567e+01  -2.7388631e+01   2.5000000e+02  -6.2506720e+00   5.1536174e+00  -1.6805293e-01
   2.4039440e+01  -2.7324929e+01   2.5000000e+02  -6.2599790e+00   5.1527689e+00   1.0049647e-01
   2.4161611e+01  -2.7255877e+01   2.5000000e+02  -6.2557972e+00   5.1293672e+00   3.2362850e-01
   2.4279795e+01  -2.7181642e+01   2.5000000e+02  -6.2394319e+00   5.0868622e+00   5.0259634e-01
   2.4393717e+01  -2.7102402e+01   2.5000000e+02  -6.2125892e+00   5.0279906e+00   6.3891094e-01
   2.4503114e+01  -2.7018346e+01   2.5000000e+02  -6.1771950e+00   4.9549537e+00   7.3407026e-01
   2.4607736e+01  -2.6929676e+01   2.5000000e+02  -6.1352063e+00   4.8696106e+00   7.8941436e-01
   2.4707347e+01  -2.6836603e+01   2.5000000e+02  -6.0884298e+00   4.7736473e+00   8.0605991e-01
   2.4801723e+01  -2.6739348e+01   2.5000000e+02  -6.0383560e+00   4.6686981e+00   7.8492580e-01
   2.4890655e+01  -2.6638142e+01   2.5000000e+02  -5.9860171e+00   4.5564053e+00   7.2682686e-01
   2.4973949e+01  -2.6533223e+01   2.5000000e+02  -5.9318790e+00   4.4384370e+00   6.3257071e-01
   2.5051423e+01  -2.6424839e+01   2.5000000e+02  -5.8757778e+00   4.3164744e+00   5.0307798e-01
   2.5122915e+01  -2.6313244e+01   2.5000000e+02  -5.8169091e+00   4.1921635e+00   3.3951257e-01
   2.5188275e+01  -2.6198700e+01   2.5000000e+02  -5.7538822e+00   4.0670740e+00   1.4335974e-01
   2.5247369e+01  -2.6081474e+01   2.5000000e+02  -5.6848311e+00   3.9426187e+00  -8.3498045e-02
   2.5300079e+01  -2.5961839e+01   2.5000000e+02  -5.6075783e+00   3.8199555e+00  -3.3874717e-01
   2.5346303e+01  -2.5840072e+01   2.5000000e+02  -5.5198243e+00   3.6998629e+00  -6.1966976e-01
   2.5385955e+01  -2.5716454e+01   2.5000000e+02  -5.4193418e+00   3.5825991e+00  -9.2321351e-01
   2.5418965e+01  -2.5591271e+01   2.5000000e+02  -5.3041471e+00   3.4677636e+00  -1.2460999e+00
   2.5445279e+01  -2.5464810e+01   2.5000000e+02  -5.1726223e+00   3.3541815e+00  -1.5849744e+00
   2.5464856e+01  -2.5337360e+01   2.5000000e+02  -5.0235752e+00   3.2398434e+00  -1.9365494e+00
   2.5477675e+01  -2.5209213e+01   2.5000000e+02  -4.8562300e+00   3.1219019e+00  -2.2976920e+00
   2.5483728e+01  -2.5080658e+01   2.5000000e+02  -4.6701224e+00   2.9967595e+00  -2.6655135e+00
   2.5483022e+01  -2.4951989e+01   2.5000000e+02  -4.4649550e+00   2.8602355e+00  -3.0372935e+00
   2.5475580e+01  -2.4823495e+01   2.5000000e+02  -4.2404070e+00   2.7077920e+00  -3.4103435e+00
   2.5461440e+01  -2.4695467e+01   2.5000000e+02  -3.9960102e+00   2.5348328e+00  -3.7817129e+00
   2.5440654e+01  -2.4568191e+01   2.5000000e+02  -3.7311140e+00   2.3370199e+00  -4.1478688e+00
   2.5413289e+01  -2.4441952e+01   2.5000000e+02  -3.4450313e+00   2.1106084e+00  -4.5043591e+00
   2.5379424e+01  -2.4317033e+01   2.5000000e+02  -3.1373312e+00   1.8527517e+00  -4.8456274e+00
   2.5339155e+01  -2.4193711e+01   2.5000000e+02  -2.8082417e+00   1.5617425e+00  -5.1650283e+00
   2.5292589e+01  -2.4072260e+01   2.5000000e+02  -2.4590478e+00   1.2371816e+00  -5.4551163e+00
   2.5239846e+01  -2.3952950e+01   2.5000000e+02  -2.0923789e+00   8.8003293e-01  -5.7081523e+00
   2.5181059e+01  -2.3836043e+01   2.5000000e+02  -1.7122777e+00   4.9256027e-01  -5.9167516e+00
   2.5116373e+01  -2.3721796e+01   2.5000000e+02  -1.3240398e+00   7.8178187e-02  -6.0745258e+00
   2.5045945e+01  -2.3610462e+01   2.5000000e+02  -9.3384278e-01  -3.5877497e-01  -6.1766001e+00
   2.4969943e+01  -2.3502284e+01   2.5000000e+02  -5.4823950e-01  -8.1332799e-01  -6.2199144e+00
   2.4888547e+01  -2.3397498e+01   2.5000000e+02  -1.7366718e-01  -1.2801457e+00  -6.2032739e+00
   2.4801945e+01  -2.3296334e+01   2.5000000e+02   1.8397432e-01  -1.7537938e+00  -6.1272023e+00
   2.4710338e+01  -2.3199011e+01   2.5000000e+02   5.1958435e-01  -2.2289673e+00  -5.9936508e+00
   2.4613934e+01  -2.3105742e+01   2.5000000e+02   8.2898787e-01  -2.7006787e+00  -5.8056714e+00
   2.4512952e+01  -2.3016728e+01   2.5000000e+02   1.1089335e+00  -3.1644218e+00  -5.5670922e+00
   2.4407618e+01  -2.2932162e+01   2.5000000e+02   1.3570412e+00  -3.6163016e+00  -5.2822520e+00
   2.4298167e+01  -2.2852228e+01   2.5000000e+02   1.5717376e+00  -4.0531405e+00  -4.9557821e+00
   2.4184843e+01  -2.2777097e+01   2.5000000e+02   1.7522305e+00  -4.4725607e+00  -4.5924105e+00
   2.4067894e+01  -2.2706932e+01   2.5000000e+02   1.8985383e+00  -4.8730149e+00  -4.1967789e+00
   2.3947577e+01  -2.2641884e+01   2.5000000e+02   2.0115366e+00  -5.2537447e+00  -3.7732521e+00
   2.3824154e+01  -2.2582093e+01   2.5000000e+02   2.0930271e+00  -5.6146752e+00  -3.3257198e+00
   2.3697894e+01  -2.2527687e+01   2.5000000e+02   2.1457645e+00  -5.9562234e+00  -2.8574308e+00
   2.3569070e+01  -2.2478782e+01   2.5000000e+02   2.1734300e+00  -6.2790628e+00  -2.3708741e+00
   2.3437960e+01  -2.2435485e+01   2.5000000e+02   2.1805324e+00  -6.5838576e+00  -1.8677584e+00
   2.3304846e+01  -2.2397887e+01   2.5000000e+02   2.1722234e+00  -6.8710292e+00  -1.3490582e+00
   2.3170014e+01  -2.2366070e+01   2.5000000e+02   2.1540842e+00  -7.1405599e+00  -8.1516974e-01
   2.3033751e+01  -2.2340100e+01   2.5000000e+02   2.1318623e+00  -7.3918748e+00  -2.6608164e-01
   2.2896351e+01  -2.2320035e+01   2.5000000e+02   2.1112420e+00  -7.6237559e+00   2.9836779e-01
   2.2758106e+01  -2.2305916e+01   2.5000000e+02   2.0976083e+00  -7.8343301e+00   8.7830456e-01
   2.2619311e+01  -2.2297773e+01   2.5000000e+02   2.0958913e+00  -8.0210538e+00   1.4735432e+00
   2.2480261e+01  -2.2295625e+01   2.5000000e+02   2.1104577e+00  -8.1807452e+00   2.0833267e+00
   2.2341254e+01  -2.2299476e+01   2.5000000e+02   2.1450460e+00  -8.3096591e+00   2.7060141e+00
   2.2202585e+01  -2.2309317e+01   2.5000000e+02   2.2027711e+00  -8.4036563e+00   3.3387781e+00
   2.2064549e+01  -2.2325128e+01   2.5000000e+02   2.2861611e+00  -8.4584777e+00   3.9772806e+00
   2.1927442e+01  -2.2346874e+01   2.5000000e+02   2.3971816e+00  -8.4701493e+00   4.6154347e+00
   2.1791557e+01  -2.2374510e+01   2.5000000e+02   2.5372773e+00  -8.4354885e+00   5.2453252e+00
   2.1657183e+01  -2.2407975e+01   2.5000000e+02   2.7073368e+00  -8.3526483e+00   5.8573295e+00
   2.1524609e+01  -2.2447199e+01   2.5000000e+02   2.9076651e+00  -8.2216137e+00   6.4404295e+00
   2.1394119e+01  -2.2492098e+01   2.5000000e+02   3.1378718e+00  -8.0445503e+00   6.9827958e+00
   2.1265995e+01  -2.2542575e+01   2.5000000e+02   3.3967620e+00  -7.8259310e+00   7.4724780e+00
   2.1140513e+01  -2.2598522e+01   2.5000000e+02   3.6822355e+00  -7.5723907e+00   7.8981783e+00
   2.1017944e+01  -2.2659819e+01   2.5000000e+02   3.9911997e+00  -7.2923403e+00   8.2499520e+00
   2.0898557e+01  -2.2726334e+01   2.5000000e+02   4.3195305e+00  -6.9954047e+00   8.5197597e+00
   2.0782611e+01  -2.2797925e+01   2.5000000e+02   4.6620995e+00  -6.6917435e+00   8.7018634e+00
   2.0670361e+01  -2.2874436e+01   2.5000000e+02   5.0128291e+00  -6.3914112e+00   8.7929876e+00
   2.0562055e+01  -2.2955703e+01   2.5000000e+02   5.3648559e+00  -6.1037790e+00   8.7923197e+00
   2.0457932e+01  -2.3041550e+01   2.5000000e+02   5.7107056e+00  -5.8370811e+00   8.7014172e+00
   2.0358227e+01  -2.3131792e+01   2.5000000e+02   6.0425632e+00  -5.5981183e+00   8.5239968e+00
   2.0263163e+01  -2.3226233e+01   2.5000000e+02   6.3525751e+00  -5.3920433e+00   8.2657283e+00
   2.0172956e+01  -2.3324668e+01   2.5000000e+02   6.6332162e+00  -5.2222889e+00   7.9339261e+00
   2.0087812e+01  -2.3426883e+01   2.5000000e+02   6.8776637e+00  -5.0905569e+00   7.5372094e+00
   2.0007928e+01  -2.3532655e+01   2.5000000e+02   7.0801488e+00  -4.9968976e+00   7.0850850e+00
   1.9933490e+01  -2.3641754e+01   2.5000000e+02   7.2362365e+00  -4.9398579e+00   6.5874614e+00
   1.9864676e+01  -2.3753940e+01   2.5000000e+02   7.3429753e+00  -4.9167085e+00   6.0541524e+00
   1.9801649e+01  -2.3868967e+01   2.5000000e+02   7.3988971e+00  -4.9237148e+00   5.4943862e+00
   1.9744563e+01  -2.3986583e+01   2.5000000e+02   7.4038569e+00  -4.9564738e+00   4.9164009e+00
   1.9693560e+01  -2.4106528e+01   2.5000000e+02   7.3587343e+00  -5.0102324e+00   4.3272296e+00
   1.9648769e+01  -2.4228537e+01   2.5000000e+02   7.2650717e+00  -5.0801909e+00   3.7326433e+00
   1.9610308e+01  -2.4352341e+01   2.5000000e+02   7.1247230e+00  -5.1617551e+00   3.1372902e+00
   1.9578279e+01  -2.4477663e+01   2.5000000e+02   6.9395935e+00  -5.2506982e+00   2.5450316e+00
   1.9552774e+01  -2.4604225e+01   2.5000000e+02   6.7115285e+00  -5.3432861e+00   1.9592443e+00
   1.9533868e+01  -2.4731743e+01   2.5000000e+02   6.4423612e+00  -5.4363046e+00   1.3832021e+00
   1.9521625e+01  -2.4859933e+01   2.5000000e+02   6.1340871e+00  -5.5270815e+00   8.2023949e-01
   1.9516092e+01  -2.4988506e+01   2.5000000e+02   5.7891112e+00  -5.6134517e+00   2.7384431e-01
   1.9517303e+01  -2.5117173e+01   2.5000000e+02   5.4104691e+00  -5.6937318e+00  -2.5250779e-01
   1.9525276e+01  -2.5245641e+01   2.5000000e+02   5.0019801e+00  -5.7666570e+00  -7.5559404e-01
   1.9540015e+01  -2.5373620e+01   2.5000000e+02   4.5682398e+00  -5.8313036e+00  -1.2328257e+00
   1.9582278e+01  -2.6044625e+01   2.5000000e+02   2.0571597e+00  -5.8988710e+00  -2.7076293e+00
   1.9636798e+01  -2.6163869e+01   2.5000000e+02   1.5963231e+00  -5.9073127e+00  -3.0179447e+00
   1.9697417e+01  -2.6280740e+01   2.5000000e+02   1.1435199e+00  -5.8987797e+00  -3.3160047e+00
   1.9764025e+01  -2.6394989e+01   2.5000000e+02   6.9965425e-01  -5.8699042e+00  -3.6059380e+00
   1.9836497e+01  -2.6506371e+01   2.5000000e+02   2.6462352e-01  -5.8168852e+00  -3.8908179e+00
   1.9914695e+01  -2.6614647e+01   2.5000000e+02  -1.6228876e-01  -5.7358048e+00  -4.1722328e+00
   1.9998467e+01  -2.6719585e+01   2.5000000e+02  -5.8192678e-01  -5.6230013e+00  -4.4500805e+00
   2.0087649e+01  -2.6820956e+01   2.5000000e+02  -9.9477132e-01  -5.4754328e+00  -4.7226534e+00
   2.0182062e+01  -2.6918543e+01   2.5000000e+02  -1.4005896e+00  -5.2909400e+00  -4.9869315e+00
   2.0281515e+01  -2.7012132e+01   2.5000000e+02  -1.7982039e+00  -5.0683789e+00  -5.2390738e+00
   2.0385805e+01  -2.7101520e+01   2.5000000e+02  -2.1855133e+00  -4.8075685e+00  -5.4749144e+00
   2.0494715e+01  -2.7186511e+01   2.5000000e+02  -2.5596619e+00  -4.5091116e+00  -5.6903831e+00
   2.0608019e+01  -2.7266919e+01   2.5000000e+02  -2.9173708e+00  -4.1741184e+00  -5.8817681e+00
   2.0725477e+01  -2.7342569e+01   2.5000000e+02  -3.2553127e+00  -3.8039547e+00  -6.0457391e+00
   2.0846840e+01  -2.7413292e+01   2.5000000e+02  -3.5704695e+00  -3.4000712e+00  -6.1792454e+00
   2.0971849e+01  -2.7478933e+01   2.5000000e+02  -3.8604454e+00  -2.9639658e+00  -6.2792658e+00
   2.1100234e+01  -2.7539347e+01   2.5000000e+02  -4.1236478e+00  -2.4973117e+00  -6.3425972e+00
   2.1231716e+01  -2.7594400e+01   2.5000000e+02  -4.3593867e+00  -2.0021788e+00  -6.3657341e+00
   2.1366011e+01  -2.7643970e+01   2.5000000e+02  -4.5678952e+00  -1.4812906e+00  -6.3448908e+00
   2.1502822e+01  -2.7687946e+01   2.5000000e+02  -4.7502837e+00  -9.3830514e-01  -6.2761644e+00
   2.1641851e+01  -2.7726231e+01   2.5000000e+02  -4.9084842e+00  -3.7796027e-01  -6.1558220e+00
   2.1782789e+01  -2.7758739e+01   2.5000000e+02  -5.0451334e+00   1.9377775e-01  -5.9806673e+00
   2.1925324e+01  -2.7785398e+01   2.5000000e+02  -5.1634360e+00   7.6972279e-01  -5.7484454e+00
   2.2069141e+01  -2.7806148e+01   2.5000000e+02  -5.2669602e+00   1.3415419e+00  -5.4582844e+00
   2.2213918e+01  -2.7820943e+01   2.5000000e+02  -5.3593778e+00   1.8999427e+00  -5.1111434e+00
   2.2359334e+01  -2.7829750e+01   2.5000000e+02  -5.4441700e+00   2.4350697e+00  -4.7102119e+00
   2.2505064e+01  -2.7832548e+01   2.5000000e+02  -5.5243233e+00   2.9370356e+00  -4.2612078e+00
   2.2650783e+01  -2.7829332e+01   2.5000000e+02  -5.6020729e+00   3.3966451e+00  -3.7724194e+00
   2.2796165e+01  -2.7820109e+01   2.5000000e+02  -5.6787276e+00   3.8061606e+00  -3.2544761e+00
   2.2940886e+01  -2.7804899e+01   2.5000000e+02  -5.7546129e+00   4.1600092e+00  -2.7197543e+00
   2.3084624e+01  -2.7783737e+01   2.5000000e+02  -5.8291332e+00   4.4552609e+00  -2.1815106e+00
   2.3227059e+01  -2.7756669e+01   2.5000000e+02  -5.9009487e+00   4.6917781e+00  -1.6528929e+00
   2.3367874e+01  -2.7723757e+01   2.5000000e+02  -5.9682259e+00   4.8720165e+00  -1.1459395e+00
   2.3506758e+01  -2.7685074e+01   2.5000000e+02  -6.0289378e+00   5.0005150e+00  -6.7080071e-01
   2.3643404e+01  -2.7640706e+01   2.5000000e+02  -6.0811522e+00   5.0831909e+00  -2.3526118e-01
   2.3777513e+01  -2.7590751e+01   2.5000000e+02  -6.1232822e+00   5.1265892e+00   1.5540938e-01
   2.3908790e+01  -2.7535322e+01   2.5000000e+02  -6.1542609e+00   5.1372057e+00   4.9827740e-01
   2.4036949e+01  -2.7474540e+01   2.5000000e+02  -6.1736405e+00   5.1209837e+00   7.9234078e-01
   2.4161713e+01  -2.7408541e+01   2.5000000e+02  -6.1815937e+00   5.0830134e+00   1.0380507e+00
   2.4282813e+01  -2.7337470e+01   2.5000000e+02  -6.1788554e+00   5.0274360e+00   1.2367589e+00
   2.4399990e+01  -2.7261485e+01   2.5000000e+02  -6.1666043e+00   4.9575026e+00   1.3902905e+00
   2.4512996e+01  -2.7180752e+01   2.5000000e+02  -6.1463191e+00   4.8757369e+00   1.5005821e+00
   2.4621593e+01  -2.7095449e+01   2.5000000e+02  -6.1196190e+00   4.7841369e+00   1.5694777e+00
   2.4725553e+01  -2.7005763e+01   2.5000000e+02  -6.0881087e+00   4.6843701e+00   1.5986113e+00
   2.4824663e+01  -2.6911889e+01   2.5000000e+02  -6.0532286e+00   4.5779174e+00   1.5894070e+00
   2.4918718e+01  -2.6814033e+01   2.5000000e+02  -6.0161243e+00   4.4661759e+00   1.5431070e+00
   2.5007530e+01  -2.6712406e+01   2.5000000e+02  -5.9775259e+00   4.3504909e+00   1.4608574e+00
   2.5090920e+01  -2.6607230e+01   2.5000000e+02  -5.9376574e+00   4.2321749e+00   1.3437957e+00
   2.5168725e+01  -2.6498730e+01   2.5000000e+02  -5.8961740e+00   4.1124909e+00   1.1931458e+00
   2.5240794e+01  -2.6387141e+01   2.5000000e+02  -5.8521529e+00   3.9926451e+00   1.0103349e+00
   2.5306989e+01  -2.6272702e+01   2.5000000e+02  -5.8041422e+00   3.8737711e+00   7.9707052e-01
   2.5367188e+01  -2.6155658e+01   2.5000000e+02  -5.7502756e+00   3.7568967e+00   5.5543206e-01
   2.5421281e+01  -2.6036259e+01   2.5000000e+02  -5.6884416e+00   3.6429008e+00   2.8788647e-01
   2.5469171e+01  -2.5914758e+01   2.5000000e+02  -5.6164818e+00   3.5324297e+00  -2.7395247e-03
   2.5510778e+01  -2.5791412e+01   2.5000000e+02  -5.5323905e+00   3.4257820e+00  -3.1333079e-01
   2.5546034e+01  -2.5666483e+01   2.5000000e+02  -5.4344827e+00   3.3227953e+00  -6.4063314e-01
   2.5574885e+01  -2.5540232e+01   2.5000000e+02  -5.3215000e+00   3.2227226e+00  -9.8143721e-01
   2.5597291e+01  -2.5412926e+01   2.5000000e+02  -5.1926550e+00   3.1241447e+00  -1.3327273e+00
   2.5613226e+01  -2.5284830e+01   2.5000000e+02  -5.0475824e+00   3.0249209e+00  -1.6918519e+00
   2.5622677e+01  -2.5156210e+01   2.5000000e+02  -4.8862177e+00   2.9222015e+00  -2.0565971e+00
   2.5625646e+01  -2.5027335e+01   2.5000000e+02  -4.7086119e+00   2.8125018e+00  -2.4251606e+00
   2.5622147e+01  -2.4898470e+01   2.5000000e+02  -4.5146943e+00   2.6918367e+00  -2.7960398e+00
   2.5612207e+01  -2.4769883e+01   2.5000000e+02  -4.3040786e+00   2.5559199e+00  -3.1677335e+00
   2.5595867e+01  -2.4641837e+01   2.5000000e+02  -4.0759399e+00   2.4004001e+00  -3.5383770e+00
   2.5573179e+01  -2.4514596e+01   2.5000000e+02  -3.8290642e+00   2.2211481e+00  -3.9053084e+00
   2.5544210e+01  -2.4388419e+01   2.5000000e+02  -3.5620766e+00   2.0145414e+00  -4.2647073e+00
   2.5509036e+01  -2.4263564e+01   2.5000000e+02  -3.2738371e+00   1.7777531e+00  -4.6114075e+00
   2.5467747e+01  -2.4140284e+01   2.5000000e+02  -2.9639248e+00   1.5089845e+00  -4.9389528e+00
   2.5420444e+01  -2.4018831e+01   2.5000000e+02  -2.6330927e+00   1.2076418e+00  -5.2399364e+00
   2.5367238e+01  -2.3899449e+01   2.5000000e+02  -2.2835513e+00   8.7439252e-01  -5.5065840e+00
   2.5308254e+01  -2.3782379e+01   2.5000000e+02  -1.9190498e+00   5.1114850e-01  -5.7314235e+00
   2.5243625e+01  -2.3667857e+01   2.5000000e+02  -1.5446647e+00   1.2092831e-01  -5.9079677e+00
   2.5173494e+01  -2.3556112e+01   2.5000000e+02  -1.1663963e+00  -2.9234938e-01  -6.0312235e+00
   2.5098015e+01  -2.3447369e+01   2.5000000e+02  -7.9066328e-01  -7.2409885e-01  -6.0979738e+00
   2.5017352e+01  -2.3341845e+01   2.5000000e+02  -4.2378600e-01  -1.1693296e+00  -6.1068190e+00
   2.4931676e+01  -2.3239751e+01   2.5000000e+02  -7.1576659e-02  -1.6228811e+00  -6.0580165e+00
   2.4841169e+01  -2.3141288e+01   2.5000000e+02   2.6090644e-01  -2.0796306e+00  -5.9531942e+00
   2.4746020e+01  -2.3046654e+01   2.5000000e+02   5.6945512e-01  -2.5346588e+00  -5.7950430e+00
   2.4646427e+01  -2.2956035e+01   2.5000000e+02   8.5069434e-01  -2.9834246e+00  -5.5870223e+00
   2.4542595e+01  -2.2869611e+01   2.5000000e+02   1.1020002e+00  -3.4218966e+00  -5.3331371e+00
   2.4434735e+01  -2.2787553e+01   2.5000000e+02   1.3214251e+00  -3.8466974e+00  -5.0377576e+00
   2.4323068e+01  -2.2710022e+01   2.5000000e+02   1.5076543e+00  -4.2552127e+00  -4.7054715e+00
   2.4207817e+01  -2.2637172e+01   2.5000000e+02   1.6600442e+00  -4.6456899e+00  -4.3409193e+00
   2.4089216e+01  -2.2569145e+01   2.5000000e+02   1.7786819e+00  -5.0172517e+00  -3.9486078e+00
   2.3967500e+01  -2.2506075e+01   2.5000000e+02   1.8644982e+00  -5.3698589e+00  -3.5326771e+00
   2.3842912e+01  -2.2448087e+01   2.5000000e+02   1.9193402e+00  -5.7041480e+00  -3.0966823e+00
   2.3715699e+01  -2.2395293e+01   2.5000000e+02   1.9460027e+00  -6.0212103e+00  -2.6433817e+00
   2.3586111e+01  -2.2347797e+01   2.5000000e+02   1.9481909e+00  -6.3222965e+00  -2.1746278e+00
   2.3454405e+01  -2.2305692e+01   2.5000000e+02   1.9303964e+00  -6.6085079e+00  -1.6913650e+00
   2.3320837e+01  -2.2269060e+01   2.5000000e+02   1.8977154e+00  -6.8805433e+00  -1.1937085e+00
   2.3185671e+01  -2.2237973e+01   2.5000000e+02   1.8556200e+00  -7.1384809e+00  -6.8116636e-01
   2.3049170e+01  -2.2212492e+01   2.5000000e+02   1.8097176e+00  -7.3816782e+00  -1.5285300e-01
   2.2911600e+01  -2.2192666e+01   2.5000000e+02   1.7655142e+00  -7.6087171e+00   3.9223764e-01
   2.2773229e+01  -2.2178534e+01   2.5000000e+02   1.7282194e+00  -7.8174094e+00   9.5497313e-01
   2.2634327e+01  -2.2170124e+01   2.5000000e+02   1.7025883e+00  -8.0048323e+00   1.5358282e+00
   2.2495164e+01  -2.2167452e+01   2.5000000e+02   1.6928183e+00  -8.1673937e+00   2.1346319e+00
   2.2356011e+01  -2.2170523e+01   2.5000000e+02   1.7025068e+00  -8.3009344e+00   2.7502840e+00
   2.2217137e+01  -2.2179331e+01   2.5000000e+02   1.7346558e+00  -8.4009039e+00   3.3804797e+00
   2.2078813e+01  -2.2193860e+01   2.5000000e+02   1.7917165e+00  -8.4626257e+00   4.0214145e+00
   2.1941309e+01  -2.2214080e+01   2.5000000e+02   1.8756295e+00  -8.4816797e+00   4.6675864e+00
   2.1804892e+01  -2.2239952e+01   2.5000000e+02   1.9878901e+00  -8.4543741e+00   5.3117087e+00
   2.1669828e+01  -2.2271426e+01   2.5000000e+02   2.1295612e+00  -8.3782627e+00   5.9447824e+00
   2.1536382e+01  -2.2308441e+01   2.5000000e+02   2.3012529e+00  -8.2526330e+00   6.5563813e+00
   2.1404814e+01  -2.2350923e+01   2.5000000e+02   2.5030525e+00  -8.0788711e+00   7.1351566e+00
   2.1275383e+01  -2.2398790e+01   2.5000000e+02   2.7344530e+00  -7.8606361e+00   7.6694443e+00
   2.1148344e+01  -2.2451949e+01   2.5000000e+02   2.9942343e+00  -7.6037881e+00   8.1479807e+00
   2.1023948e+01  -2.2510294e+01   2.5000000e+02   3.2803543e+00  -7.3160789e+00   8.5605737e+00
   2.0902441e+01  -2.2573713e+01   2.5000000e+02   3.5899072e+00  -7.0066480e+00   8.8986463e+00
   2.0784065e+01  -2.2642079e+01   2.5000000e+02   3.9190449e+00  -6.6854149e+00   9.1556277e+00
   2.0669056e+01  -2.2715259e+01   2.5000000e+02   4.2630272e+00  -6.3624429e+00   9.3271354e+00
   2.0557645e+01  -2.2793110e+01   2.5000000e+02   4.6162568e+00  -6.0473709e+00   9.4110084e+00
   2.0450059e+01  -2.2875477e+01   2.5000000e+02   4.9723737e+00  -5.7489538e+00   9.4072293e+00
   2.0346514e+01  -2.2962198e+01   2.5000000e+02   5.3244342e+00  -5.4747067e+00   9.3177778e+00
   2.0247223e+01  -2.3053101e+01   2.5000000e+02   5.6651120e+00  -5.2307131e+00   9.1464394e+00
   2.0152390e+01  -2.3148008e+01   2.5000000e+02   5.9869863e+00  -5.0214903e+00   8.8986072e+00
   2.0062213e+01  -2.3246729e+01   2.5000000e+02   6.2828391e+00  -4.8499535e+00   8.5810769e+00
   1.9976880e+01  -2.3349068e+01   2.5000000e+02   6.5460250e+00  -4.7174297e+00   8.2017576e+00
   1.9896571e+01  -2.3454823e+01   2.5000000e+02   6.7708035e+00  -4.6237474e+00   7.7693288e+00
   1.9821459e+01  -2.3563781e+01   2.5000000e+02   6.9526042e+00  -4.5673752e+00   7.2928690e+00
   1.9751705e+01  -2.3675726e+01   2.5000000e+02   7.0882165e+00  -4.5456208e+00   6.7813828e+00
   1.9687464e+01  -2.3790433e+01   2.5000000e+02   7.1758150e+00  -4.5548938e+00   6.2433922e+00
   1.9628877e+01  -2.3907671e+01   2.5000000e+02   7.2148431e+00  -4.5909756e+00   5.6865705e+00
   1.9576078e+01  -2.4027205e+01   2.5000000e+02   7.2057753e+00  -4.6493317e+00   5.1174751e+00
   1.9529189e+01  -2.4148793e+01   2.5000000e+02   7.1497766e+00  -4.7253624e+00   4.5415025e+00
   1.9488322e+01  -2.4272190e+01   2.5000000e+02   7.0483625e+00  -4.8146309e+00   3.9629636e+00
   1.9453576e+01  -2.4397145e+01   2.5000000e+02   6.9031119e+00  -4.9130071e+00   3.3853648e+00
   1.9425041e+01  -2.4523405e+01   2.5000000e+02   6.7155108e+00  -5.0167729e+00   2.8117168e+00
   1.9402792e+01  -2.4650711e+01   2.5000000e+02   6.4869431e+00  -5.1226448e+00   2.2449242e+00
   1.9386895e+01  -2.4778802e+01   2.5000000e+02   6.2188307e+00  -5.2277999e+00   1.6880161e+00
   1.9377401e+01  -2.4907418e+01   2.5000000e+02   5.9128509e+00  -5.3298598e+00   1.1442850e+00
   1.9374351e+01  -2.5036291e+01   2.5000000e+02   5.5712215e+00  -5.4268808e+00   6.1727554e-01
   1.9377770e+01  -2.5165157e+01   2.5000000e+02   5.1968857e+00  -5.5173407e+00   1.1055974e-01
   1.9387672e+01  -2.5293749e+01   2.5000000e+02   4.7936490e+00  -5.6001130e+00  -3.7255767e-01
   1.9404057e+01  -2.5421799e+01   2.5000000e+02   4.3661583e+00  -5.6744091e+00  -8.2940304e-01
   1.9426911e+01  -2.5549041e+01   2.5000000e+02   3.9197378e+00  -5.7396824e+00  -1.2582997e+00
   1.9456209e+01  -2.5675208e+01   2.5000000e+02   3.4601181e+00  -5.7954845e+00  -1.6588554e+00
   1.9491908e+01  -2.5800036e+01   2.5000000e+02   2.9930467e+00  -5.8412683e+00  -2.0320991e+00
   1.9533954e+01  -2.5923262e+01   2.5000000e+02   2.5238764e+00  -5.8761838e+00  -2.3804801e+00
   1.9714474e+01  -2.6573850e+01   2.5000000e+02   1.2385861e-01  -5.7301829e+00  -3.3362086e+00
   1.9792084e+01  -2.6681696e+01   2.5000000e+02  -2.8091612e-01  -5.6690248e+00  -3.6004789e+00
   1.9874991e+01  -2.6786394e+01   2.5000000e+02  -6.7908086e-01  -5.5793549e+00  -3.8643268e+00
   1.9963048e+01  -2.6887738e+01   2.5000000e+02  -1.0716993e+00  -5.4582700e+00  -4.1264355e+00
   2.0056096e+01  -2.6985528e+01   2.5000000e+02  -1.4591093e+00  -5.3036266e+00  -4.3841419e+00
   2.0153966e+01  -2.7079572e+01   2.5000000e+02  -1.8406789e+00  -5.1141744e+00  -4.6338879e+00
   2.0256476e+01  -2.7169685e+01   2.5000000e+02  -2.2147378e+00  -4.8895408e+00  -4.8717160e+00
   2.0363436e+01  -2.7255686e+01   2.5000000e+02  -2.5787014e+00  -4.6300682e+00  -5.0937461e+00
   2.0474643e+01  -2.7337406e+01   2.5000000e+02  -2.9293594e+00  -4.3365491e+00  -5.2964409e+00
   2.0589885e+01  -2.7414681e+01   2.5000000e+02  -3.2632196e+00  -4.0099543e+00  -5.4767274e+00
   2.0708943e+01  -2.7487358e+01   2.5000000e+02  -3.5768960e+00  -3.6512061e+00  -5.6318843e+00
   2.0831584e+01  -2.7555290e+01   2.5000000e+02  -3.8674099e+00  -3.2611169e+00  -5.7592917e+00
   2.0957571e+01  -2.7618341e+01   2.5000000e+02  -4.1324489e+00  -2.8404324e+00  -5.8561638e+00
   2.1086657e+01  -2.7676384e+01   2.5000000e+02  -4.3704930e+00  -2.3900540e+00  -5.9193098e+00
   2.1218587e+01  -2.7729303e+01   2.5000000e+02  -4.5808797e+00  -1.9113215e+00  -5.9450365e+00
   2.1353099e+01  -2.7776990e+01   2.5000000e+02  -4.7638044e+00  -1.4063137e+00  -5.9292176e+00
   2.1489926e+01  -2.7819350e+01   2.5000000e+02  -4.9203069e+00  -8.7809686e-01  -5.8674758e+00
   2.1628795e+01  -2.7856296e+01   2.5000000e+02  -5.0522200e+00  -3.3092193e-01  -5.7554947e+00
   2.1769425e+01  -2.7887753e+01   2.5000000e+02  -5.1621073e+00   2.2965497e-01  -5.5893722e+00
   2.1911535e+01  -2.7913657e+01   2.5000000e+02  -5.2531541e+00   7.9675825e-01  -5.3660332e+00
   2.2054838e+01  -2.7933957e+01   2.5000000e+02  -5.3289926e+00   1.3622133e+00  -5.0836789e+00
   2.2199043e+01  -2.7948610e+01   2.5000000e+02  -5.3934636e+00   1.9167166e+00  -4.7422904e+00
   2.2343859e+01  -2.7957588e+01   2.5000000e+02  -5.4503368e+00   2.4501918e+00  -4.3440717e+00
   2.2488992e+01  -2.7960870e+01   2.5000000e+02  -5.5030084e+00   2.9523148e+00  -3.8938518e+00
   2.2634147e+01  -2.7958452e+01   2.5000000e+02  -5.5542317e+00   3.4132492e+00  -3.3992074e+00
   2.2779029e+01  -2.7950337e+01   2.5000000e+02  -5.6059180e+00   3.8244648e+00  -2.8703353e+00
   2.2923346e+01  -2.7936543e+01   2.5000000e+02  -5.6590350e+00   4.1795244e+00  -2.3195015e+00
   2.3066804e+01  -2.7917097e+01   2.5000000e+02  -5.7136178e+00   4.4746449e+00  -1.7602537e+00
   2.3209114e+01  -2.7892039e+01   2.5000000e+02  -5.7688846e+00   4.7089765e+00  -1.2063597e+00
   2.3349987e+01  -2.7861420e+01   2.5000000e+02  -5.8234345e+00   4.8844823e+00  -6.7079480e-01
   2.3489141e+01  -2.7825302e+01   2.5000000e+02  -5.8755013e+00   5.0055059e+00  -1.6482119e-01
   2.3626295e+01  -2.7783759e+01   2.5000000e+02  -5.9232186e+00   5.0780841e+00   3.0259610e-01
   2.3761176e+01  -2.7736873e+01   2.5000000e+02  -5.9648749e+00   5.1091775e+00   7.2506995e-01
   2.3893514e+01  -2.7684741e+01   2.5000000e+02  -5.9991046e+00   5.1059275e+00   1.0987320e+00
   2.4023048e+01  -2.7627467e+01   2.5000000e+02  -6.0250289e+00   5.0750611e+00   1.4219029e+00
   2.4149521e+01  -2.7565168e+01   2.5000000e+02  -6.0423052e+00   5.0224927e+00   1.6946141e+00
   2.4272685e+01  -2.7497967e+01   2.5000000e+02  -6.0511186e+00   4.9531363e+00   1.9180690e+00
   2.4392301e+01  -2.7426001e+01   2.5000000e+02  -6.0520998e+00   4.8708916e+00   2.0941823e+00
   2.4508136e+01  -2.7349414e+01   2.5000000e+02  -6.0462255e+00   4.7787706e+00   2.2251382e+00
   2.4619969e+01  -2.7268357e+01   2.5000000e+02  -6.0346861e+00   4.6790812e+00   2.3131371e+00
   2.4727586e+01  -2.7182994e+01   2.5000000e+02  -6.0187545e+00   4.5736316e+00   2.3602418e+00
   2.4830783e+01  -2.7093494e+01   2.5000000e+02  -5.9996681e+00   4.4639091e+00   2.3682946e+00
   2.4929369e+01  -2.7000034e+01   2.5000000e+02  -5.9785139e+00   4.3511960e+00   2.3389464e+00
   2.5023159e+01  -2.6902800e+01   2.5000000e+02  -5.9561308e+00   4.2366491e+00   2.2736781e+00
   2.5111984e+01  -2.6801982e+01   2.5000000e+02  -5.9330111e+00   4.1213097e+00   2.1738755e+00
   2.5195681e+01  -2.6697780e+01   2.5000000e+02  -5.9092195e+00   4.0061185e+00   2.0408851e+00
   2.5274103e+01  -2.6590398e+01   2.5000000e+02  -5.8843239e+00   3.8918999e+00   1.8761010e+00
   2.5347112e+01  -2.6480045e+01   2.5000000e+02  -5.8573698e+00   3.7793829e+00   1.6810348e+00
   2.5414581e+01  -2.6366936e+01   2.5000000e+02  -5.8269059e+00   3.6692163e+00   1.4574243e+00
   2.5476398e+01  -2.6251292e+01   2.5000000e+02  -5.7910800e+00   3.5619777e+00   1.2073346e+00
   2.5532459e+01  -2.6133336e+01   2.5000000e+02  -5.7477979e+00   3.4581865e+00   9.3318300e-01
   2.5582675e+01  -2.6013296e+01   2.5000000e+02  -5.6949268e+00   3.3582580e+00   6.3777081e-01
   2.5626968e+01  -2.5891402e+01   2.5000000e+02  -5.6305073e+00   3.2624461e+00   3.2419308e-01
   2.5665272e+01  -2.5767889e+01   2.5000000e+02  -5.5529398e+00   3.1707493e+00  -4.2852966e-03
   2.5697533e+01  -2.5642992e+01   2.5000000e+02  -5.4611099e+00   3.0828059e+00  -3.4443223e-01
   2.5723708e+01  -2.5516949e+01   2.5000000e+02  -5.3544400e+00   2.9977976e+00  -6.9324399e-01
   2.5743768e+01  -2.5390000e+01   2.5000000e+02  -5.2328574e+00   2.9143678e+00  -1.0481302e+00
   2.5757695e+01  -2.5262384e+01   2.5000000e+02  -5.0966734e+00   2.8305804e+00  -1.4070693e+00
   2.5765480e+01  -2.5134343e+01   2.5000000e+02  -4.9463952e+00   2.7439191e+00  -1.7686583e+00
   2.5767130e+01  -2.5006116e+01   2.5000000e+02  -4.7824760e+00   2.6513148e+00  -2.1320602e+00
   2.5762661e+01  -2.4877945e+01   2.5000000e+02  -4.6050580e+00   2.5492438e+00  -2.4968117e+00
   2.5752099e+01  -2.4750069e+01   2.5000000e+02  -4.4137442e+00   2.4338568e+00  -2.8625114e+00
   2.5735483e+01  -2.4622726e+01   2.5000000e+02  -4.2074957e+00   2.3011585e+00  -3.2283705e+00
   2.5712863e+01  -2.4496152e+01   2.5000000e+02  -3.9846930e+00   2.1472328e+00  -3.5927504e+00
   2.5684298e+01  -2.4370582e+01   2.5000000e+02  -3.7433955e+00   1.9684989e+00  -3.9527609e+00
   2.5649858e+01  -2.4246248e+01   2.5000000e+02  -3.4817712e+00   1.7619705e+00  -4.3040308e+00
   2.5609623e+01  -2.4123378e+01   2.5000000e+02  -3.1986142e+00   1.5254974e+00  -4.6407380e+00
   2.5563683e+01  -2.4002198e+01   2.5000000e+02  -2.8938420e+00   1.2579621e+00  -4.9559129e+00
   2.5512139e+01  -2.3882929e+01   2.5000000e+02  -2.5688405e+00   9.5938971e-01  -5.2419866e+00
   2.5455099e+01  -2.3765790e+01   2.5000000e+02  -2.2265761e+00   6.3097103e-01  -5.4914730e+00
   2.5392680e+01  -2.3650995e+01   2.5000000e+02  -1.8714485e+00   2.7498081e-01  -5.6976442e+00
   2.5325011e+01  -2.3538751e+01   2.5000000e+02  -1.5089276e+00  -1.0537719e-01  -5.8550720e+00
   2.5252227e+01  -2.3429262e+01   2.5000000e+02  -1.1450532e+00  -5.0616876e-01  -5.9599622e+00
   2.5174470e+01  -2.3322726e+01   2.5000000e+02  -7.8592058e-01  -9.2295621e-01  -6.0102406e+00
   2.5091893e+01  -2.3219335e+01   2.5000000e+02  -4.3726614e-01  -1.3510011e+00  -6.0054324e+00
   2.5004655e+01  -2.3119276e+01   2.5000000e+02  -1.0417957e-01  -1.7854556e+00  -5.9464211e+00
   2.4912921e+01  -2.3022729e+01   2.5000000e+02   2.0901571e-01  -2.2215309e+00  -5.8351552e+00
   2.4816865e+01  -2.2929866e+01   2.5000000e+02   4.9874152e-01  -2.6546368e+00  -5.6743808e+00
   2.4716668e+01  -2.2840855e+01   2.5000000e+02   7.6207715e-01  -3.0805157e+00  -5.4674458e+00
   2.4612515e+01  -2.2755854e+01   2.5000000e+02   9.9666637e-01  -3.4954051e+00  -5.2181521e+00
   2.4504600e+01  -2.2675015e+01   2.5000000e+02   1.2006348e+00  -3.8961633e+00  -4.9306645e+00
   2.4393119e+01  -2.2598482e+01   2.5000000e+02   1.3725986e+00  -4.2804272e+00  -4.6094004e+00
   2.4278276e+01  -2.2526391e+01   2.5000000e+02   1.5117132e+00  -4.6467072e+00  -4.2588968e+00
   2.4160281e+01  -2.2458871e+01   2.5000000e+02   1.6177877e+00  -4.9944408e+00  -3.8836138e+00
   2.4039345e+01  -2.2396042e+01   2.5000000e+02   1.6914134e+00  -5.3239686e+00  -3.4876687e+00
   2.3915687e+01  -2.2338014e+01   2.5000000e+02   1.7340546e+00  -5.6363775e+00  -3.0745781e+00
   2.3789528e+01  -2.2284891e+01   2.5000000e+02   1.7481054e+00  -5.9332681e+00  -2.6470130e+00
   2.3661093e+01  -2.2236767e+01   2.5000000e+02   1.7368556e+00  -6.2164408e+00  -2.2066388e+00
   2.3530612e+01  -2.2193726e+01   2.5000000e+02   1.7043874e+00  -6.4875545e+00  -1.7540824e+00
   2.3398314e+01  -2.2155846e+01   2.5000000e+02   1.6554167e+00  -6.7478279e+00  -1.2890123e+00
   2.3264435e+01  -2.2123192e+01   2.5000000e+02   1.5950718e+00  -6.9977875e+00  -8.1035096e-01
   2.3129212e+01  -2.2095823e+01   2.5000000e+02   1.5286850e+00  -7.2371334e+00  -3.1653329e-01
   2.2992881e+01  -2.2073786e+01   2.5000000e+02   1.4615605e+00  -7.4646873e+00   1.9421906e-01
   2.2855685e+01  -2.2057121e+01   2.5000000e+02   1.3987928e+00  -7.6783911e+00   7.2358077e-01
   2.2717864e+01  -2.2045857e+01   2.5000000e+02   1.3450970e+00  -7.8753795e+00   1.2728985e+00
   2.2579660e+01  -2.2040014e+01   2.5000000e+02   1.3047003e+00  -8.0520527e+00   1.8429225e+00
   2.2441316e+01  -2.2039602e+01   2.5000000e+02   1.2812746e+00  -8.2041865e+00   2.4335635e+00
   2.2303075e+01  -2.2044622e+01   2.5000000e+02   1.2779229e+00  -8.3270826e+00   3.0436463e+00
   2.2165180e+01  -2.2055065e+01   2.5000000e+02   1.2972022e+00  -8.4157846e+00   3.6706641e+00
   2.2027873e+01  -2.2070913e+01   2.5000000e+02   1.3411803e+00  -8.4653793e+00   4.3105686e+00
   2.1891396e+01  -2.2092137e+01   2.5000000e+02   1.4114932e+00  -8.4713863e+00   4.9576273e+00
   2.1755989e+01  -2.2118700e+01   2.5000000e+02   1.5094098e+00  -8.4302165e+00   5.6044159e+00
   2.1621891e+01  -2.2150556e+01   2.5000000e+02   1.6358588e+00  -8.3396454e+00   6.2419615e+00
   2.1489339e+01  -2.2187648e+01   2.5000000e+02   1.7914133e+00  -8.1992349e+00   6.8600729e+00
   2.1358566e+01  -2.2229911e+01   2.5000000e+02   1.9762590e+00  -8.0106236e+00   7.4478357e+00
   2.1229806e+01  -2.2277270e+01   2.5000000e+02   2.1901118e+00  -7.7776380e+00   7.9941853e+00
   2.1103288e+01  -2.2329641e+01   2.5000000e+02   2.4321312e+00  -7.5061697e+00   8.4885637e+00
   2.0979236e+01  -2.2386931e+01   2.5000000e+02   2.7008293e+00  -7.2038481e+00   8.9214961e+00
   2.0857874e+01  -2.2449039e+01   2.5000000e+02   2.9939985e+00  -6.8795687e+00   9.2850252e+00
   2.0739418e+01  -2.2515856e+01   2.5000000e+02   3.3086594e+00  -6.5429045e+00   9.5730349e+00
   2.0624084e+01  -2.2587261e+01   2.5000000e+02   3.6410203e+00  -6.2035530e+00   9.7813536e+00
   2.0512081e+01  -2.2663129e+01   2.5000000e+02   3.9865271e+00  -5.8708055e+00   9.9077502e+00
   2.0403611e+01  -2.2743324e+01   2.5000000e+02   4.3398776e+00  -5.5531374e+00   9.9518341e+00
   2.0298876e+01  -2.2827704e+01   2.5000000e+02   4.6951367e+00  -5.2579404e+00   9.9148758e+00
   2.0198066e+01  -2.2916117e+01   2.5000000e+02   5.0458517e+00  -4.9912992e+00   9.7996879e+00
   2.0101371e+01  -2.3008406e+01   2.5000000e+02   5.3852717e+00  -4.7579311e+00   9.6104320e+00
   2.0008971e+01  -2.3104406e+01   2.5000000e+02   5.7065743e+00  -4.5611164e+00   9.3524991e+00
   1.9921040e+01  -2.3203944e+01   2.5000000e+02   6.0031581e+00  -4.4027190e+00   9.0323330e+00
   1.9837745e+01  -2.3306841e+01   2.5000000e+02   6.2689600e+00  -4.2832364e+00   8.6572107e+00
   1.9759248e+01  -2.3412912e+01   2.5000000e+02   6.4987518e+00  -4.2019015e+00   8.2349646e+00
   1.9685700e+01  -2.3521966e+01   2.5000000e+02   6.6883727e+00  -4.1568096e+00   7.7736615e+00
   1.9617246e+01  -2.3633805e+01   2.5000000e+02   6.8348774e+00  -4.1451234e+00   7.2812376e+00
   1.9554023e+01  -2.3748227e+01   2.5000000e+02   6.9365643e+00  -4.1633005e+00   6.7651282e+00
   1.9496160e+01  -2.3865024e+01   2.5000000e+02   6.9928618e+00  -4.2073400e+00   6.2319790e+00
   1.9443775e+01  -2.3983984e+01   2.5000000e+02   7.0041046e+00  -4.2730222e+00   5.6874471e+00
   1.9396979e+01  -2.4104888e+01   2.5000000e+02   6.9712405e+00  -4.3561288e+00   5.1361561e+00
   1.9355873e+01  -2.4227516e+01   2.5000000e+02   6.8955165e+00  -4.4526117e+00   4.5817663e+00
   1.9320549e+01  -2.4351643e+01   2.5000000e+02   6.7782137e+00  -4.5587001e+00   4.0272228e+00
   1.9291088e+01  -2.4477041e+01   2.5000000e+02   6.6204863e+00  -4.6709575e+00   3.4750627e+00
   1.9267562e+01  -2.4603478e+01   2.5000000e+02   6.4233425e+00  -4.7863047e+00   2.9277407e+00
   1.9250032e+01  -2.4730719e+01   2.5000000e+02   6.1877522e+00  -4.9020167e+00   2.3879019e+00
   1.9238550e+01  -2.4858530e+01   2.5000000e+02   5.9148521e+00  -5.0157269e+00   1.8585155e+00
   1.9233154e+01  -2.4986671e+01   2.5000000e+02   5.6062090e+00  -5.1254101e+00   1.3429389e+00
   1.9233875e+01  -2.5114905e+01   2.5000000e+02   5.2640453e+00  -5.2294154e+00   8.4472264e-01
   1.9240730e+01  -2.5242990e+01   2.5000000e+02   4.8914184e+00  -5.3264503e+00   3.6741690e-01
   1.9253725e+01  -2.5370685e+01   2.5000000e+02   4.4922677e+00  -5.4155838e+00  -8.5793897e-02
   1.9272856e+01  -2.5497751e+01   2.5000000e+02   4.0713433e+00  -5.4962067e+00  -5.1245392e-01
   1.9298106e+01  -2.5623947e+01   2.5000000e+02   3.6340264e+00  -5.5679399e+00  -9.1114569e-01
   1.9329446e+01  -2.5749033e+01   2.5000000e+02   3.1860195e+00  -5.6305067e+00  -1.2817614e+00
   1.9366837e+01  -2.5872771e+01   2.5000000e+02   2.7329618e+00  -5.6835621e+00  -1.6256430e+00
   1.9410225e+01  -2.5994925e+01   2.5000000e+02   2.2800117e+00  -5.7264892e+00  -1.9455230e+00
   1.9459548e+01  -2.6115262e+01   2.5000000e+02   1.8314513e+00  -5.7582193e+00  -2.2453219e+00
   1.9514729e+01  -2.6233549e+01   2.5000000e+02   1.3903960e+00  -5.7770790e+00  -2.5297017e+00
   1.9575679e+01  -2.6349558e+01   2.5000000e+02   9.5862681e-01  -5.7807325e+00  -2.8035211e+00
   1.9642298e+01  -2.6463065e+01   2.5000000e+02   5.3663485e-01  -5.7662314e+00  -3.0712154e+00
   1.9948419e+01  -2.7071110e+01   2.5000000e+02  -1.5696536e+00  -5.2392799e+00  -3.8264079e+00
   2.0046386e+01  -2.7165472e+01   2.5000000e+02  -1.9376781e+00  -5.0735947e+00  -4.0720937e+00
   2.0148837e+01  -2.7256058e+01   2.5000000e+02  -2.3006361e+00  -4.8754019e+00  -4.3085110e+00
   2.0255598e+01  -2.7342702e+01   2.5000000e+02  -2.6560033e+00  -4.6450163e+00  -4.5318869e+00
   2.0366482e+01  -2.7425244e+01   2.5000000e+02  -3.0004837e+00  -4.3831331e+00  -4.7388865e+00
   2.0481296e+01  -2.7503533e+01   2.5000000e+02  -3.3303846e+00  -4.0905185e+00  -4.9267437e+00
   2.0599836e+01  -2.7577424e+01   2.5000000e+02  -3.6419824e+00  -3.7677759e+00  -5.0931448e+00
   2.0721891e+01  -2.7646780e+01   2.5000000e+02  -3.9318703e+00  -3.4152195e+00  -5.2359676e+00
   2.0847241e+01  -2.7711473e+01   2.5000000e+02  -4.1972114e+00  -3.0329200e+00  -5.3529307e+00
   2.0975661e+01  -2.7771382e+01   2.5000000e+02  -4.4358950e+00  -2.6208950e+00  -5.4413009e+00
   2.1106917e+01  -2.7826395e+01   2.5000000e+02  -4.6466094e+00  -2.1794175e+00  -5.4976892e+00
   2.1240769e+01  -2.7876411e+01   2.5000000e+02  -4.8288684e+00  -1.7093437e+00  -5.5180242e+00
   2.1376971e+01  -2.7921334e+01   2.5000000e+02  -4.9829987e+00  -1.2124284e+00  -5.4976976e+00
   2.1515271e+01  -2.7961082e+01   2.5000000e+02  -5.1101453e+00  -6.9156193e-01  -5.4317831e+00
   2.1655413e+01  -2.7995579e+01   2.5000000e+02  -5.2122435e+00  -1.5094483e-01  -5.3153868e+00
   2.1797138e+01  -2.8024762e+01   2.5000000e+02  -5.2919817e+00   4.0380744e-01  -5.1440018e+00
   2.1940180e+01  -2.8048574e+01   2.5000000e+02  -5.3526943e+00   9.6559078e-01  -4.9139691e+00
   2.2084271e+01  -2.8066971e+01   2.5000000e+02  -5.3982018e+00   1.5258667e+00  -4.6229573e+00
   2.2229144e+01  -2.8079920e+01   2.5000000e+02  -5.4325703e+00   2.0748475e+00  -4.2705129e+00
   2.2374524e+01  -2.8087394e+01   2.5000000e+02  -5.4598220e+00   2.6018393e+00  -3.8586359e+00
   2.2520141e+01  -2.8089380e+01   2.5000000e+02  -5.4836420e+00   3.0959055e+00  -3.3921495e+00
   2.2665719e+01  -2.8085875e+01   2.5000000e+02  -5.5071049e+00   3.5466381e+00  -2.8789095e+00
   2.2810986e+01  -2.8076885e+01   2.5000000e+02  -5.5324756e+00   3.9450938e+00  -2.3295895e+00
   2.2955670e+01  -2.8062427e+01   2.5000000e+02  -5.5610999e+00   4.2846131e+00  -1.7571072e+00
   2.3099498e+01  -2.8042528e+01   2.5000000e+02  -5.5933980e+00   4.5614202e+00  -1.1757241e+00
   2.3242202e+01  -2.8017226e+01   2.5000000e+02  -5.6289548e+00   4.7748850e+00  -5.9991740e-01
   2.3383515e+01  -2.7986567e+01   2.5000000e+02  -5.6666938e+00   4.9273703e+00  -4.3304562e-02
   2.3523174e+01  -2.7950611e+01   2.5000000e+02  -5.7050938e+00   5.0237466e+00   4.8232189e-01
   2.3660920e+01  -2.7909424e+01   2.5000000e+02  -5.7424469e+00   5.0706636e+00   9.6759450e-01
   2.3796496e+01  -2.7863083e+01   2.5000000e+02  -5.7770920e+00   5.0757294e+00   1.4058501e+00
   2.3929654e+01  -2.7811676e+01   2.5000000e+02  -5.8076138e+00   5.0467326e+00   1.7930932e+00
   2.4060150e+01  -2.7755298e+01   2.5000000e+02  -5.8329923e+00   4.9910121e+00   2.1276202e+00
   2.4187744e+01  -2.7694055e+01   2.5000000e+02  -5.8526700e+00   4.9150351e+00   2.4095382e+00
   2.4312205e+01  -2.7628060e+01   2.5000000e+02  -5.8665593e+00   4.8241881e+00   2.6402184e+00
   2.4433310e+01  -2.7557436e+01   2.5000000e+02  -5.8749850e+00   4.7227537e+00   2.8217876e+00
   2.4550840e+01  -2.7482315e+01   2.5000000e+02  -5.8785963e+00   4.6140325e+00   2.9566898e+00
   2.4664587e+01  -2.7402835e+01   2.5000000e+02  -5.8782539e+00   4.5005281e+00   3.0474072e+00
   2.4774350e+01  -2.7319142e+01   2.5000000e+02  -5.8749168e+00   4.3841612e+00   3.0962832e+00
   2.4879937e+01  -2.7231392e+01   2.5000000e+02  -5.8695371e+00   4.2664506e+00   3.1054699e+00
   2.4981165e+01  -2.7139745e+01   2.5000000e+02  -5.8629776e+00   4.1486509e+00   3.0769033e+00
   2.5077861e+01  -2.7044369e+01   2.5000000e+02  -5.8559309e+00   4.0318196e+00   3.0123565e+00
   2.5169861e+01  -2.6945437e+01   2.5000000e+02  -5.8488477e+00   3.9168439e+00   2.9134656e+00
   2.5257010e+01  -2.6843131e+01   2.5000000e+02  -5.8418573e+00   3.8044322e+00   2.7817851e+00
   2.5339165e+01  -2.6737636e+01   2.5000000e+02  -5.8346883e+00   3.6951066e+00   2.6188161e+00
   2.5416191e+01  -2.6629143e+01   2.5000000e+02  -5.8266017e+00   3.5892200e+00   2.4260668e+00
   2.5487966e+01  -2.6517847e+01   2.5000000e+02  -5.8163569e+00   3.4869831e+00   2.2051466e+00
   2.5554375e+01  -2.6403948e+01   2.5000000e+02  -5.8022428e+00   3.3885286e+00   1.9578629e+00
   2.5615318e+01  -2.6287652e+01   2.5000000e+02  -5.7821831e+00   3.2939446e+00   1.6863561e+00
   2.5670702e+01  -2.6169165e+01   2.5000000e+02  -5.7539175e+00   3.2033211e+00   1.3931336e+00
   2.5720446e+01  -2.6048698e+01   2.5000000e+02  -5.7152280e+00   3.1167309e+00   1.0811103e+00
   2.5764481e+01  -2.5926466e+01   2.5000000e+02  -5.6641738e+00   3.0341871e+00   7.5352762e-01
   2.5802745e+01  -2.5802684e+01   2.5000000e+02  -5.5992871e+00   2.9555777e+00   4.1377191e-01
   2.5835191e+01  -2.5677571e+01   2.5000000e+02  -5.5197019e+00   2.8805627e+00   6.5190255e-02
   2.5861780e+01  -2.5551347e+01   2.5000000e+02  -5.4251902e+00   2.8084972e+00  -2.8917105e-01
   2.5882485e+01  -2.5424232e+01   2.5000000e+02  -5.3161053e+00   2.7383461e+00  -6.4678057e-01
   2.5897288e+01  -2.5296449e+01   2.5000000e+02  -5.1932407e+00   2.6686310e+00  -1.0057861e+00
   2.5906183e+01  -2.5168220e+01   2.5000000e+02  -5.0576062e+00   2.5973891e+00  -1.3651060e+00
   2.5909172e+01  -2.5039767e+01   2.5000000e+02  -4.9101504e+00   2.5221698e+00  -1.7244054e+00
   2.5906269e+01  -2.4911313e+01   2.5000000e+02  -4.7514623e+00   2.4400541e+00  -2.0839203e+00
   2.5897498e+01  -2.4783078e+01   2.5000000e+02  -4.5814965e+00   2.3477177e+00  -2.4441596e+00
   2.5882891e+01  -2.4655284e+01   2.5000000e+02  -4.3994074e+00   2.2415459e+00  -2.8054544e+00
   2.5862492e+01  -2.4528148e+01   2.5000000e+02  -4.2035369e+00   2.1177854e+00  -3.1674581e+00
   2.5836353e+01  -2.4401889e+01   2.5000000e+02  -3.9916203e+00   1.9727635e+00  -3.5286496e+00
   2.5804534e+01  -2.4276721e+01   2.5000000e+02  -3.7611731e+00   1.8031266e+00  -3.8860000e+00
   2.5767107e+01  -2.4152857e+01   2.5000000e+02  -3.5100350e+00   1.6061014e+00  -4.2348345e+00
   2.5724151e+01  -2.4030507e+01   2.5000000e+02  -3.2369237e+00   1.3797337e+00  -4.5690159e+00
   2.5675754e+01  -2.3909876e+01   2.5000000e+02  -2.9419003e+00   1.1230667e+00  -4.8813837e+00
   2.5622011e+01  -2.3791169e+01   2.5000000e+02  -2.6266372e+00   8.3625037e-01  -5.1643850e+00
   2.5563027e+01  -2.3674584e+01   2.5000000e+02  -2.2944103e+00   5.2053236e-01  -5.4107854e+00
   2.5498915e+01  -2.3560318e+01   2.5000000e+02  -1.9498490e+00   1.7818318e-01  -5.6143012e+00
   2.5429794e+01  -2.3448561e+01   2.5000000e+02  -1.5984762e+00  -1.8767651e-01  -5.7700654e+00
   2.5355792e+01  -2.3339499e+01   2.5000000e+02  -1.2461963e+00  -5.7325881e-01  -5.8748354e+00
   2.5277042e+01  -2.3233315e+01   2.5000000e+02  -8.9880017e-01  -9.7430917e-01  -5.9269858e+00
   2.5193686e+01  -2.3130184e+01   2.5000000e+02  -5.6160259e-01  -1.3862945e+00  -5.9263183e+00
   2.5105873e+01  -2.3030278e+01   2.5000000e+02  -2.3924653e-01  -1.8045493e+00  -5.8737935e+00
   2.5013755e+01  -2.2933761e+01   2.5000000e+02   6.4353369e-02  -2.2244320e+00  -5.7712560e+00
   2.4917495e+01  -2.2840793e+01   2.5000000e+02   3.4591448e-01  -2.6414265e+00  -5.6212206e+00
   2.4817258e+01  -2.2751528e+01   2.5000000e+02   6.0268438e-01  -3.0512977e+00  -5.4267347e+00
   2.4713215e+01  -2.2666113e+01   2.5000000e+02   8.3231473e-01  -3.4502327e+00  -5.1913076e+00
   2.4605544e+01  -2.2584686e+01   2.5000000e+02   1.0327946e+00  -3.8350044e+00  -4.9188705e+00
   2.4494428e+01  -2.2507383e+01   2.5000000e+02   1.2024629e+00  -4.2031285e+00  -4.6137329e+00
   2.4380052e+01  -2.2434330e+01   2.5000000e+02   1.3400974e+00  -4.5530338e+00  -4.2804513e+00
   2.4262609e+01  -2.2365647e+01   2.5000000e+02   1.4450373e+00  -4.8841367e+00  -3.9236488e+00
   2.4142293e+01  -2.2301445e+01   2.5000000e+02   1.5173430e+00  -5.1968686e+00  -3.5477241e+00
   2.4019305e+01  -2.2241829e+01   2.5000000e+02   1.5579191e+00  -5.4925559e+00  -3.1565491e+00
   2.3893846e+01  -2.2186898e+01   2.5000000e+02   1.5685976e+00  -5.7732115e+00  -2.7531456e+00
   2.3766125e+01  -2.2136739e+01   2.5000000e+02   1.5521264e+00  -6.0412006e+00  -2.3394586e+00
   2.3636349e+01  -2.2091435e+01   2.5000000e+02   1.5121066e+00  -6.2988800e+00  -1.9162362e+00
   2.3504731e+01  -2.2051060e+01   2.5000000e+02   1.4528396e+00  -6.5482144e+00  -1.4830788e+00
   2.3371486e+01  -2.2015679e+01   2.5000000e+02   1.3791381e+00  -6.7904752e+00  -1.0386043e+00
   2.3236830e+01  -2.1985350e+01   2.5000000e+02   1.2961182e+00  -7.0260306e+00  -5.8072105e-01
   2.3100982e+01  -2.1960121e+01   2.5000000e+02   1.2089807e+00  -7.2542387e+00  -1.0695261e-01
   2.2964163e+01  -2.1940034e+01   2.5000000e+02   1.1228238e+00  -7.4734422e+00   3.8523572e-01
   2.2826593e+01  -2.1925122e+01   2.5000000e+02   1.0424669e+00  -7.6810294e+00   8.9814915e-01
   2.2688496e+01  -2.1915408e+01   2.5000000e+02   9.7231560e-01  -7.8735226e+00   1.4335742e+00
   2.2550094e+01  -2.1910909e+01   2.5000000e+02   9.1627802e-01  -8.0467090e+00   1.9925519e+00
   2.2411611e+01  -2.1911631e+01   2.5000000e+02   8.7770614e-01  -8.1957781e+00   2.5751273e+00
   2.2273271e+01  -2.1917574e+01   2.5000000e+02   8.5940626e-01  -8.3155120e+00   3.1801275e+00
   2.2135297e+01  -2.1928727e+01   2.5000000e+02   8.6365874e-01  -8.4005304e+00   3.8049534e+00
   2.1997912e+01  -2.1945073e+01   2.5000000e+02   8.9229443e-01  -8.4456122e+00   4.4454069e+00
   2.1861340e+01  -2.1966586e+01   2.5000000e+02   9.4675568e-01  -8.4460922e+00   5.0955992e+00
   2.1725799e+01  -2.1993229e+01   2.5000000e+02   1.0281502e+00  -8.3983053e+00   5.7480193e+00
   2.1591512e+01  -2.2024961e+01   2.5000000e+02   1.1373184e+00  -8.3000377e+00   6.3936744e+00
   2.1458695e+01  -2.2061730e+01   2.5000000e+02   1.2748158e+00  -8.1509037e+00   7.0224965e+00
   2.1327566e+01  -2.2103475e+01   2.5000000e+02   1.4408958e+00  -7.9526041e+00   7.6237914e+00
   2.1198337e+01  -2.2150129e+01   2.5000000e+02   1.6354661e+00  -7.7089841e+00   8.1868524e+00
   2.1071220e+01  -2.2201616e+01   2.5000000e+02   1.8580036e+00  -7.4259017e+00   8.7015224e+00
   2.0946424e+01  -2.2257853e+01   2.5000000e+02   2.1074803e+00  -7.1108919e+00   9.1587341e+00
   2.0824155e+01  -2.2318747e+01   2.5000000e+02   2.3822730e+00  -6.7726912e+00   9.5509122e+00
   2.0704614e+01  -2.2384199e+01   2.5000000e+02   2.6801188e+00  -6.4206845e+00   9.8722185e+00
   2.0588000e+01  -2.2454103e+01   2.5000000e+02   2.9980690e+00  -6.0643691e+00   1.0118619e+01
   2.0474506e+01  -2.2528343e+01   2.5000000e+02   3.3324566e+00  -5.7128628e+00   1.0287848e+01
   2.0364324e+01  -2.2606800e+01   2.5000000e+02   3.6789383e+00  -5.3745442e+00   1.0379247e+01
   2.0257639e+01  -2.2689343e+01   2.5000000e+02   4.0324910e+00  -5.0567674e+00   1.0393623e+01
   2.0154632e+01  -2.2775838e+01   2.5000000e+02   4.3875320e+00  -4.7657120e+00   1.0333060e+01
   2.0055477e+01  -2.2866142e+01   2.5000000e+02   4.7380125e+00  -4.5062882e+00   1.0200803e+01
   1.9960346e+01  -2.2960106e+01   2.5000000e+02   5.0776106e+00  -4.2821241e+00   1.0001129e+01
   1.9869404e+01  -2.3057577e+01   2.5000000e+02   5.3999641e+00  -4.0955578e+00   9.7392451e+00
   1.9782808e+01  -2.3158392e+01   2.5000000e+02   5.6989100e+00  -3.9476645e+00   9.4211846e+00
   1.9700711e+01  -2.3262384e+01   2.5000000e+02   5.9687978e+00  -3.8383385e+00   9.0536150e+00
   1.9623261e+01  -2.3369382e+01   2.5000000e+02   6.2047541e+00  -3.7663926e+00   8.6436101e+00
   1.9550595e+01  -2.3479208e+01   2.5000000e+02   6.4028793e+00  -3.7296809e+00   8.1983934e+00
   1.9482847e+01  -2.3591678e+01   2.5000000e+02   6.5603912e+00  -3.7253032e+00   7.7250177e+00
   1.9420141e+01  -2.3706605e+01   2.5000000e+02   6.6756414e+00  -3.7498009e+00   7.2300575e+00
   1.9362596e+01  -2.3823796e+01   2.5000000e+02   6.7480162e+00  -3.7993854e+00   6.7193630e+00
   1.9310322e+01  -2.3943055e+01   2.5000000e+02   6.7777343e+00  -3.8701391e+00   6.1978877e+00
   1.9263420e+01  -2.4064182e+01   2.5000000e+02   6.7655719e+00  -3.9581879e+00   5.6696501e+00
   1.9221985e+01  -2.4186972e+01   2.5000000e+02   6.7125773e+00  -4.0598335e+00   5.1378207e+00
   1.9186102e+01  -2.4311218e+01   2.5000000e+02   6.6198150e+00  -4.1716248e+00   4.6049184e+00
   1.9155847e+01  -2.4436709e+01   2.5000000e+02   6.4882038e+00  -4.2903888e+00   4.0731032e+00
   1.9131290e+01  -2.4563232e+01   2.5000000e+02   6.3184813e+00  -4.4132442e+00   3.5444649e+00
   1.9112488e+01  -2.4690571e+01   2.5000000e+02   6.1112817e+00  -4.5375733e+00   3.0213165e+00
   1.9099491e+01  -2.4818509e+01   2.5000000e+02   5.8673320e+00  -4.6610348e+00   2.5063468e+00
   1.9092340e+01  -2.4946827e+01   2.5000000e+02   5.5876966e+00  -4.7815645e+00   2.0026825e+00
   1.9091065e+01  -2.5075303e+01   2.5000000e+02   5.2740283e+00  -4.8973910e+00   1.5138170e+00
   1.9095686e+01  -2.5203716e+01   2.5000000e+02   4.9287612e+00  -5.0070678e+00   1.0433886e+00
   1.9106215e+01  -2.5331844e+01   2.5000000e+02   4.5552263e+00  -5.1094947e+00   5.9488967e-01
   1.9122651e+01  -2.5459465e+01   2.5000000e+02   4.1576467e+00  -5.2039040e+00   1.7133848e-01
   1.9144986e+01  -2.5586355e+01   2.5000000e+02   3.7410288e+00  -5.2898346e+00  -2.2508912e-01
   1.9173198e+01  -2.5712294e+01   2.5000000e+02   3.3109051e+00  -5.3670384e+00  -5.9336195e-01
   1.9207258e+01  -2.5837061e+01   2.5000000e+02   2.8730194e+00  -5.4353642e+00  -9.3383421e-01
   1.9247123e+01  -2.5960436e+01   2.5000000e+02   2.4329172e+00  -5.4945809e+00  -1.2483193e+00
   1.9292743e+01  -2.6082202e+01   2.5000000e+02   1.9955155e+00  -5.5442042e+00  -1.5400429e+00
   1.9344055e+01  -2.6202142e+01   2.5000000e+02   1.5647293e+00  -5.5833109e+00  -1.8133477e+00
   1.9400984e+01  -2.6320044e+01   2.5000000e+02   1.1431772e+00  -5.6104058e+00  -2.0732543e+00
   1.9463449e+01  -2.6435698e+01   2.5000000e+02   7.3207309e-01  -5.6233741e+00  -2.3249066e+00
   1.9531353e+01  -2.6548897e+01   2.5000000e+02   3.3130761e-01  -5.6195147e+00  -2.5729078e+00
   1.9604592e+01  -2.6659438e+01   2.5000000e+02  -6.0286081e-02  -5.5957091e+00  -2.8207865e+00
   1.9683050e+01  -2.6767121e+01   2.5000000e+02  -4.4449938e-01  -5.5486712e+00  -3.0705577e+00
   1.9766599e+01  -2.6871753e+01   2.5000000e+02  -8.2324848e-01  -5.4752578e+00  -3.3225249e+00
   1.9855105e+01  -2.6973144e+01   2.5000000e+02  -1.1980605e+00  -5.3727868e+00  -3.5753695e+00
   2.0276273e+01  -2.7525541e+01   2.5000000e+02  -3.1055005e+00  -4.3489637e+00  -4.2098118e+00
   2.0391263e+01  -2.7604104e+01   2.5000000e+02  -3.4312331e+00  -4.0858816e+00  -4.3983248e+00
   2.0509864e+01  -2.7678433e+01   2.5000000e+02  -3.7400945e+00  -3.7951942e+00  -4.5680996e+00
   2.0631879e+01  -2.7748401e+01   2.5000000e+02  -4.0283554e+00  -3.4768263e+00  -4.7176284e+00
   2.0757106e+01  -2.7813887e+01   2.5000000e+02  -4.2928166e+00  -3.1302891e+00  -4.8452769e+00
   2.0885336e+01  -2.7874777e+01   2.5000000e+02  -4.5309588e+00  -2.7548746e+00  -4.9489015e+00
   2.1016352e+01  -2.7930967e+01   2.5000000e+02  -4.7410130e+00  -2.3499672e+00  -5.0255800e+00
   2.1149934e+01  -2.7982360e+01   2.5000000e+02  -4.9219745e+00  -1.9153945e+00  -5.0715367e+00
   2.1285852e+01  -2.8028866e+01   2.5000000e+02  -5.0735990e+00  -1.4517866e+00  -5.0822021e+00
   2.1423876e+01  -2.8070404e+01   2.5000000e+02  -5.1964210e+00  -9.6082546e-01  -5.0524202e+00
   2.1563767e+01  -2.8106902e+01   2.5000000e+02  -5.2917641e+00  -4.4548513e-01  -4.9767193e+00
   2.1705286e+01  -2.8138297e+01   2.5000000e+02  -5.3617495e+00   8.9837461e-02  -4.8496575e+00
   2.1848187e+01  -2.8164533e+01   2.5000000e+02  -5.4092566e+00   6.3917671e-01  -4.6662252e+00
   2.1992222e+01  -2.8185565e+01   2.5000000e+02  -5.4378290e+00   1.1949499e+00  -4.4223161e+00
   2.2137143e+01  -2.8201357e+01   2.5000000e+02  -5.4514950e+00   1.7480036e+00  -4.1153034e+00
   2.2282695e+01  -2.8211879e+01   2.5000000e+02  -5.4545239e+00   2.2878097e+00  -3.7446974e+00
   2.2428627e+01  -2.8217116e+01   2.5000000e+02  -5.4511435e+00   2.8029793e+00  -3.3127004e+00
   2.2574683e+01  -2.8217055e+01   2.5000000e+02  -5.4452478e+00   3.2819618e+00  -2.8246935e+00
   2.2720608e+01  -2.8211700e+01   2.5000000e+02  -5.4401391e+00   3.7139935e+00  -2.2892900e+00
   2.2866149e+01  -2.8201057e+01   2.5000000e+02  -5.4383385e+00   4.0900759e+00  -1.7180712e+00
   2.3011052e+01  -2.8185146e+01   2.5000000e+02  -5.4414738e+00   4.4038152e+00  -1.1248491e+00
   2.3155065e+01  -2.8163996e+01   2.5000000e+02  -5.4502649e+00   4.6519863e+00  -5.2463579e-01
   2.3297937e+01  -2.8137642e+01   2.5000000e+02  -5.4646019e+00   4.8346946e+00   6.7523757e-02
   2.3439422e+01  -2.8106131e+01   2.5000000e+02  -5.4836858e+00   4.9551354e+00   6.3772419e-01
   2.3579274e+01  -2.8069518e+01   2.5000000e+02  -5.5062369e+00   5.0190068e+00   1.1740793e+00
   2.3717252e+01  -2.8027866e+01   2.5000000e+02  -5.5307239e+00   5.0337220e+00   1.6673285e+00
   2.3853120e+01  -2.7981249e+01   2.5000000e+02  -5.5555873e+00   5.0075461e+00   2.1110606e+00
   2.3986646e+01  -2.7929747e+01   2.5000000e+02  -5.5794451e+00   4.9488088e+00   2.5015655e+00
   2.4117601e+01  -2.7873449e+01   2.5000000e+02  -5.6012344e+00   4.8652821e+00   2.8374620e+00
   2.4245765e+01  -2.7812453e+01   2.5000000e+02  -5.6202874e+00   4.7637661e+00   3.1191947e+00
   2.4370922e+01  -2.7746865e+01   2.5000000e+02  -5.6363497e+00   4.6499022e+00   3.3484411e+00
   2.4492862e+01  -2.7676797e+01   2.5000000e+02  -5.6495400e+00   4.5281687e+00   3.5275895e+00
   2.4611383e+01  -2.7602370e+01   2.5000000e+02  -5.6602604e+00   4.4020023e+00   3.6593391e+00
   2.4726290e+01  -2.7523713e+01   2.5000000e+02  -5.6690977e+00   4.2739988e+00   3.7464026e+00
   2.4837393e+01  -2.7440959e+01   2.5000000e+02  -5.6767296e+00   4.1461380e+00   3.7913219e+00
   2.4944514e+01  -2.7354250e+01   2.5000000e+02  -5.6838229e+00   4.0199542e+00   3.7964518e+00
   2.5047479e+01  -2.7263734e+01   2.5000000e+02  -5.6909792e+00   3.8966875e+00   3.7639298e+00
   2.5146126e+01  -2.7169566e+01   2.5000000e+02  -5.6986754e+00   3.7773358e+00   3.6957417e+00
   2.5240299e+01  -2.7071903e+01   2.5000000e+02  -5.7072270e+00   3.6626860e+00   3.5937175e+00
   2.5329851e+01  -2.6970912e+01   2.5000000e+02  -5.7167197e+00   3.5532820e+00   3.4595895e+00
   2.5414645e+01  -2.6866763e+01   2.5000000e+02  -5.7269406e+00   3.4494102e+00   3.2949774e+00
   2.5494552e+01  -2.6759630e+01   2.5000000e+02  -5.7372903e+00   3.3511058e+00   3.1014085e+00
   2.5569454e+01  -2.6649693e+01   2.5000000e+02  -5.7467023e+00   3.2581844e+00   2.8803897e+00
   2.5639242e+01  -2.6537136e+01   2.5000000e+02  -5.7536125e+00   3.1703191e+00   2.6334986e+00
   2.5703813e+01  -2.6422145e+01   2.5000000e+02  -5.7560011e+00   3.0871318e+00   2.3625078e+00
   2.5763079e+01  -2.6304912e+01   2.5000000e+02  -5.7515182e+00   3.0082469e+00   2.0695564e+00
   2.5816957e+01  -2.6185630e+01   2.5000000e+02  -5.7377005e+00   2.9333582e+00   1.7572032e+00
   2.5865377e+01  -2.6064495e+01   2.5000000e+02  -5.7122251e+00   2.8622159e+00   1.4284592e+00
   2.5908276e+01  -2.5941708e+01   2.5000000e+02  -5.6731668e+00   2.7946032e+00   1.0866894e+00
   2.5945602e+01  -2.5817467e+01   2.5000000e+02  -5.6191985e+00   2.7302672e+00   7.3540871e-01
   2.5977311e+01  -2.5691977e+01   2.5000000e+02  -5.5497132e+00   2.6688483e+00   3.7806509e-01
   2.6003372e+01  -2.5565441e+01   2.5000000e+02  -5.4648377e+00   2.6097952e+00   1.7753822e-02
   2.6023759e+01  -2.5438065e+01   2.5000000e+02  -5.3653529e+00   2.5523062e+00  -3.4302147e-01
   2.6038458e+01  -2.5310053e+01   2.5000000e+02  -5.2525188e+00   2.4952544e+00  -7.0253808e-01
   2.6047463e+01  -2.5181612e+01   2.5000000e+02  -5.1278311e+00   2.4371414e+00  -1.0599467e+00
   2.6050779e+01  -2.5052948e+01   2.5000000e+02  -4.9927148e+00   2.3760496e+00  -1.4152679e+00
   2.6048417e+01  -2.4924267e+01   2.5000000e+02  -4.8481942e+00   2.3096253e+00  -1.7692513e+00
   2.6040400e+01  -2.4795773e+01   2.5000000e+02  -4.6945884e+00   2.2350761e+00  -2.1230721e+00
   2.6026758e+01  -2.4667672e+01   2.5000000e+02  -4.5312998e+00   2.1492278e+00  -2.4778934e+00
   2.6007529e+01  -2.4540166e+01   2.5000000e+02  -4.3567527e+00   2.0486237e+00  -2.8343533e+00
   2.5982761e+01  -2.4413457e+01   2.5000000e+02  -4.1685514e+00   1.9296903e+00  -3.1920183e+00
   2.5952508e+01  -2.4287744e+01   2.5000000e+02  -3.9638373e+00   1.7889575e+00  -3.5489717e+00
   2.5916835e+01  -2.4163224e+01   2.5000000e+02  -3.7398223e+00   1.6233148e+00  -3.9015822e+00
   2.5875813e+01  -2.4040093e+01   2.5000000e+02  -3.4943802e+00   1.4302768e+00  -4.2445714e+00
   2.5829521e+01  -2.3918543e+01   2.5000000e+02  -3.2265823e+00   1.2082073e+00  -4.5713631e+00
   2.5778045e+01  -2.3798764e+01   2.5000000e+02  -2.9370619e+00   9.5648062e-01  -4.8746582e+00
   2.5721479e+01  -2.3680941e+01   2.5000000e+02  -2.6281205e+00   6.7554146e-01  -5.1471338e+00
   2.5659924e+01  -2.3565257e+01   2.5000000e+02  -2.3035685e+00   3.6687704e-01  -5.3821157e+00
   2.5593487e+01  -2.3451890e+01   2.5000000e+02  -1.9683330e+00   3.2894594e-02  -5.5741162e+00
   2.5522283e+01  -2.3341017e+01   2.5000000e+02  -1.6279577e+00  -3.2323427e-01  -5.7191339e+00
   2.5446433e+01  -2.3232808e+01   2.5000000e+02  -1.2880718e+00  -6.9777296e-01  -5.8147284e+00
   2.5366063e+01  -2.3127428e+01   2.5000000e+02  -9.5397196e-01  -1.0865908e+00  -5.8598837e+00
   2.5281307e+01  -2.3025039e+01   2.5000000e+02  -6.3037125e-01  -1.4853008e+00  -5.8547575e+00
   2.5192303e+01  -2.2925798e+01   2.5000000e+02  -3.2129847e-01  -1.8893944e+00  -5.8004105e+00
   2.5099196e+01  -2.2829857e+01   2.5000000e+02  -3.0155453e-02  -2.2943453e+00  -5.6985777e+00
   2.5002135e+01  -2.2737362e+01   2.5000000e+02   2.4015810e-01  -2.6957291e+00  -5.5515270e+00
   2.4901275e+01  -2.2648453e+01   2.5000000e+02   4.8709046e-01  -3.0893477e+00  -5.3620063e+00
   2.4796777e+01  -2.2563265e+01   2.5000000e+02   7.0832558e-01  -3.4713801e+00  -5.1332541e+00
   2.4688803e+01  -2.2481928e+01   2.5000000e+02   9.0175173e-01  -3.8385724e+00  -4.8690155e+00
   2.4577524e+01  -2.2404565e+01   2.5000000e+02   1.0654889e+00  -4.1884151e+00  -4.5735304e+00
   2.4463110e+01  -2.2331292e+01   2.5000000e+02   1.1980181e+00  -4.5193413e+00  -4.2514203e+00
   2.4345741e+01  -2.2262222e+01   2.5000000e+02   1.2983273e+00  -4.8308287e+00  -3.9075087e+00
   2.4225595e+01  -2.2197457e+01   2.5000000e+02   1.3660974e+00  -5.1234765e+00  -3.5464837e+00
   2.4102858e+01  -2.2137095e+01   2.5000000e+02   1.4018382e+00  -5.3988991e+00  -3.1725637e+00
   2.3977715e+01  -2.2081227e+01   2.5000000e+02   1.4069863e+00  -5.6595378e+00  -2.7891061e+00
   2.3850358e+01  -2.2029938e+01   2.5000000e+02   1.3839136e+00  -5.9083164e+00  -2.3983266e+00
   2.3720978e+01  -2.1983304e+01   2.5000000e+02   1.3358621e+00  -6.1482533e+00  -2.0011047e+00
   2.3589772e+01  -2.1941395e+01   2.5000000e+02   1.2668129e+00  -6.3820291e+00  -1.5969971e+00
   2.3456937e+01  -2.1904275e+01   2.5000000e+02   1.1813090e+00  -6.6116306e+00  -1.1843710e+00
   2.3322672e+01  -2.1871998e+01   2.5000000e+02   1.0842454e+00  -6.8380768e+00  -7.6067929e-01
   2.3187180e+01  -2.1844614e+01   2.5000000e+02   9.8067803e-01  -7.0612658e+00  -3.2281807e-01
   2.3050662e+01  -2.1822163e+01   2.5000000e+02   8.7561886e-01  -7.2799472e+00   1.3253318e-01
   2.2913322e+01  -2.1804679e+01   2.5000000e+02   7.7387784e-01  -7.4917633e+00   6.0855087e-01
   2.2775366e+01  -2.1792188e+01   2.5000000e+02   6.7991966e-01  -7.6933565e+00   1.1079658e+00
   2.2637000e+01  -2.1784709e+01   2.5000000e+02   5.9776059e-01  -7.8805093e+00   1.6328017e+00
   2.2498430e+01  -2.1782252e+01   2.5000000e+02   5.3089723e-01  -8.0483005e+00   2.1841349e+00
   2.2359861e+01  -2.1784823e+01   2.5000000e+02   4.8229465e-01  -8.1912927e+00   2.7618767e+00
   2.2221502e+01  -2.1792416e+01   2.5000000e+02   4.5438017e-01  -8.3037480e+00   3.3645451e+00
   2.2083558e+01  -2.1805020e+01   2.5000000e+02   4.4910519e-01  -8.3799233e+00   3.9891261e+00
   2.1946235e+01  -2.1822617e+01   2.5000000e+02   4.6800863e-01  -8.4144140e+00   4.6309406e+00
   2.1809738e+01  -2.1845180e+01   2.5000000e+02   5.1228190e-01  -8.4025616e+00   5.2836322e+00
   2.1674271e+01  -2.1872676e+01   2.5000000e+02   5.8284258e-01  -8.3408903e+00   5.9392796e+00
   2.1540036e+01  -2.1905063e+01   2.5000000e+02   6.8036794e-01  -8.2275168e+00   6.5886577e+00
   2.1407236e+01  -2.1942292e+01   2.5000000e+02   8.0531822e-01  -8.0624811e+00   7.2216268e+00
   2.1276069e+01  -2.1984309e+01   2.5000000e+02   9.5793078e-01  -7.8479235e+00   7.8276759e+00
   2.1146733e+01  -2.2031049e+01   2.5000000e+02   1.1381583e+00  -7.5880860e+00   8.3964640e+00
   2.1019424e+01  -2.2082443e+01   2.5000000e+02   1.3456358e+00  -7.2891137e+00   8.9183849e+00
   2.0894334e+01  -2.2138413e+01   2.5000000e+02   1.5795919e+00  -6.9586795e+00   9.3850372e+00
   2.0771653e+01  -2.2198876e+01   2.5000000e+02   1.8387937e+00  -6.6055021e+00   9.7895423e+00
   2.0651568e+01  -2.2263739e+01   2.5000000e+02   2.1214624e+00  -6.2388115e+00   1.0126713e+01
   2.0534263e+01  -2.2332907e+01   2.5000000e+02   2.4252578e+00  -5.8678396e+00   1.0393065e+01
   2.0419919e+01  -2.2406273e+01   2.5000000e+02   2.7472003e+00  -5.5013857e+00   1.0586711e+01
   2.0308713e+01  -2.2483727e+01   2.5000000e+02   3.0836970e+00  -5.1474866e+00   1.0707186e+01
   2.0200816e+01  -2.2565153e+01   2.5000000e+02   3.4305369e+00  -4.8131917e+00   1.0755251e+01
   2.0096398e+01  -2.2650427e+01   2.5000000e+02   3.7829204e+00  -4.5044566e+00   1.0732711e+01
   1.9995623e+01  -2.2739418e+01   2.5000000e+02   4.1355384e+00  -4.2260727e+00   1.0642291e+01
   1.9898650e+01  -2.2831994e+01   2.5000000e+02   4.4827192e+00  -3.9816647e+00   1.0487525e+01
   1.9805634e+01  -2.2928011e+01   2.5000000e+02   4.8185491e+00  -3.7737028e+00   1.0272717e+01
   1.9716725e+01  -2.3027325e+01   2.5000000e+02   5.1371396e+00  -3.6035394e+00   1.0002846e+01
   1.9632067e+01  -2.3129783e+01   2.5000000e+02   5.4328338e+00  -3.4714493e+00   9.6835007e+00
   1.9551798e+01  -2.3235229e+01   2.5000000e+02   5.7004863e+00  -3.3767099e+00   9.3207262e+00
   1.9476052e+01  -2.3343501e+01   2.5000000e+02   5.9356871e+00  -3.3177119e+00   8.9208414e+00
   1.9404954e+01  -2.3454432e+01   2.5000000e+02   6.1349405e+00  -3.2920886e+00   8.4902081e+00
   1.9338627e+01  -2.3567853e+01   2.5000000e+02   6.2957821e+00  -3.2969126e+00   8.0349543e+00
   1.9277184e+01  -2.3683587e+01   2.5000000e+02   6.4167546e+00  -3.3288541e+00   7.5607632e+00
   1.9220732e+01  -2.3801457e+01   2.5000000e+02   6.4973309e+00  -3.3843919e+00   7.0726289e+00
   1.9169372e+01  -2.3921279e+01   2.5000000e+02   6.5377102e+00  -3.4599679e+00   6.5747638e+00
   1.9123198e+01  -2.4042867e+01   2.5000000e+02   6.5385759e+00  -3.5521212e+00   6.0705521e+00
   1.9082297e+01  -2.4166031e+01   2.5000000e+02   6.5008271e+00  -3.6575692e+00   5.5626450e+00
   1.9046746e+01  -2.4290580e+01   2.5000000e+02   6.4253435e+00  -3.7732443e+00   5.0531408e+00
   1.9016617e+01  -2.4416318e+01   2.5000000e+02   6.3128415e+00  -3.8963072e+00   4.5438494e+00
   1.8991974e+01  -2.4543048e+01   2.5000000e+02   6.1638284e+00  -4.0241335e+00   4.0365600e+00
   1.8972871e+01  -2.4670569e+01   2.5000000e+02   5.9786789e+00  -4.1542896e+00   3.5333127e+00
   1.8959356e+01  -2.4798682e+01   2.5000000e+02   5.7578089e+00  -4.2845482e+00   3.0365388e+00
   1.8951466e+01  -2.4927181e+01   2.5000000e+02   5.5019193e+00  -4.4128751e+00   2.5491819e+00
   1.8949233e+01  -2.5055864e+01   2.5000000e+02   5.2122334e+00  -4.5374873e+00   2.0745810e+00
   1.8952678e+01  -2.5184526e+01   2.5000000e+02   4.8907157e+00  -4.6568632e+00   1.6163534e+00
   1.8961812e+01  -2.5312959e+01   2.5000000e+02   4.5402167e+00  -4.7697798e+00   1.1781313e+00
   1.8976640e+01  -2.5440959e+01   2.5000000e+02   4.1644992e+00  -4.8753456e+00   7.6320651e-01
   1.8997156e+01  -2.5568319e+01   2.5000000e+02   3.7681842e+00  -4.9729727e+00   3.7422603e-01
   1.9023345e+01  -2.5694833e+01   2.5000000e+02   3.3565602e+00  -5.0623408e+00   1.2839692e-02
   1.9055182e+01  -2.5820297e+01   2.5000000e+02   2.9352914e+00  -5.1433090e+00  -3.2057337e-01
   1.9092635e+01  -2.5944507e+01   2.5000000e+02   2.5100517e+00  -5.2157956e+00  -6.2708621e-01
   1.9135659e+01  -2.6067259e+01   2.5000000e+02   2.0861030e+00  -5.2796099e+00  -9.0923179e-01
   1.9184203e+01  -2.6188354e+01   2.5000000e+02   1.6678590e+00  -5.3342951e+00  -1.1708841e+00
   1.9238205e+01  -2.6307592e+01   2.5000000e+02   1.2585550e+00  -5.3789617e+00  -1.4168964e+00
   1.9297592e+01  -2.6424776e+01   2.5000000e+02   8.6001408e-01  -5.4121745e+00  -1.6526084e+00
   1.9362282e+01  -2.6539714e+01   2.5000000e+02   4.7259738e-01  -5.4319179e+00  -1.8832536e+00
   1.9432187e+01  -2.6652214e+01   2.5000000e+02   9.5372402e-02  -5.4356606e+00  -2.1133598e+00
   1.9507204e+01  -2.6762089e+01   2.5000000e+02  -2.7355903e-01  -5.4205021e+00  -2.3461823e+00
   1.9587223e+01  -2.6869156e+01   2.5000000e+02  -6.3659071e-01  -5.3834317e+00  -2.5833769e+00
   1.9672127e+01  -2.6973236e+01   2.5000000e+02  -9.9608172e-01  -5.3216206e+00  -2.8248736e+00
   1.9761785e+01  -2.7074154e+01   2.5000000e+02  -1.3538417e+00  -5.2327057e+00  -3.0689737e+00
   1.9856060e+01  -2.7171739e+01   2.5000000e+02  -1.7107337e+00  -5.1150172e+00  -3.3127317e+00
   1.9954807e+01  -2.7265827e+01   2.5000000e+02  -2.0664376e+00  -4.9676751e+00  -3.5524440e+00
   2.0057868e+01  -2.7356258e+01   2.5000000e+02  -2.4193831e+00  -4.7905508e+00  -3.7841838e+00
   2.0165081e+01  -2.7442878e+01   2.5000000e+02  -2.7669009e+00  -4.5840778e+00  -4.0043206e+00
   2.0686306e+01  -2.7925669e+01   2.5000000e+02  -4.4169701e+00  -3.1470656e+00  -4.3417886e+00
   2.0814779e+01  -2.7986786e+01   2.5000000e+02  -4.6530049e+00  -2.8059111e+00  -4.4520091e+00
   2.0945959e+01  -2.8043369e+01   2.5000000e+02  -4.8608293e+00  -2.4358216e+00  -4.5399083e+00
   2.1079638e+01  -2.8095326e+01   2.5000000e+02  -5.0390991e+00  -2.0357913e+00  -4.6020950e+00
   2.1215606e+01  -2.8142574e+01   2.5000000e+02  -5.1871646e+00  -1.6055064e+00  -4.6341999e+00
   2.1353647e+01  -2.8185037e+01   2.5000000e+02  -5.3050777e+00  -1.1456521e+00  -4.6310373e+00
   2.1493540e+01  -2.8222644e+01   2.5000000e+02  -5.3936292e+00  -6.5814183e-01  -4.5868588e+00
   2.1635060e+01  -2.8255337e+01   2.5000000e+02  -5.4544020e+00  -1.4629881e-01  -4.4956234e+00
   2.1777982e+01  -2.8283060e+01   2.5000000e+02  -5.4897739e+00   3.8498872e-01  -4.3513877e+00
   2.1922073e+01  -2.8305770e+01   2.5000000e+02  -5.5028878e+00   9.2909949e-01  -4.1487170e+00
   2.2067101e+01  -2.8323429e+01   2.5000000e+02  -5.4975314e+00   1.4776424e+00  -3.8832796e+00
   2.2212832e+01  -2.8336008e+01   2.5000000e+02  -5.4779507e+00   2.0205357e+00  -3.5525150e+00
   2.2359029e+01  -2.8343488e+01   2.5000000e+02  -5.4486035e+00   2.5463393e+00  -3.1563549e+00
   2.2505454e+01  -2.8345856e+01   2.5000000e+02  -5.4138809e+00   3.0428941e+00  -2.6978535e+00
   2.2651871e+01  -2.8343107e+01   2.5000000e+02  -5.3778332e+00   3.4982265e+00  -2.1835250e+00
   2.2798041e+01  -2.8335247e+01   2.5000000e+02  -5.3439283e+00   3.9015726e+00  -1.6233063e+00
   2.2943728e+01  -2.8322288e+01   2.5000000e+02  -5.3148707e+00   4.2444075e+00  -1.0300486e+00
   2.3088695e+01  -2.8304252e+01   2.5000000e+02  -5.2924937e+00   4.5212224e+00  -4.1861371e-01
   2.3232707e+01  -2.8281167e+01   2.5000000e+02  -5.2777405e+00   4.7299580e+00   1.9529745e-01
   2.3375531e+01  -2.8253072e+01   2.5000000e+02  -5.2707195e+00   4.8720002e+00   7.9639814e-01
   2.3516939e+01  -2.8220012e+01   2.5000000e+02  -5.2708431e+00   4.9517804e+00   1.3709267e+00
   2.3656701e+01  -2.8182041e+01   2.5000000e+02  -5.2770158e+00   4.9760692e+00   1.9074523e+00
   2.3794595e+01  -2.8139219e+01   2.5000000e+02  -5.2878553e+00   4.9531226e+00   2.3973821e+00
   2.3930400e+01  -2.8091618e+01   2.5000000e+02  -5.3019043e+00   4.8918023e+00   2.8350444e+00
   2.4063901e+01  -2.8039313e+01   2.5000000e+02  -5.3178388e+00   4.8008153e+00   3.2174630e+00
   2.4194885e+01  -2.7982389e+01   2.5000000e+02  -5.3345998e+00   4.6881355e+00   3.5439175e+00
   2.4323149e+01  -2.7920938e+01   2.5000000e+02  -5.3514727e+00   4.5606415e+00   3.8154056e+00
   2.4448489e+01  -2.7855059e+01   2.5000000e+02  -5.3681108e+00   4.4239886e+00   4.0340229e+00
   2.4570713e+01  -2.7784858e+01   2.5000000e+02  -5.3844845e+00   4.2826221e+00   4.2025012e+00
   2.4689631e+01  -2.7710446e+01   2.5000000e+02  -5.4008149e+00   4.1399467e+00   4.3237642e+00
   2.4805061e+01  -2.7631944e+01   2.5000000e+02  -5.4174636e+00   3.9985223e+00   4.4007017e+00
   2.4916827e+01  -2.7549475e+01   2.5000000e+02  -5.4348561e+00   3.8602963e+00   4.4359952e+00
   2.5024761e+01  -2.7463172e+01   2.5000000e+02  -5.4533911e+00   3.7267761e+00   4.4321151e+00
   2.5128703e+01  -2.7373171e+01   2.5000000e+02  -5.4734047e+00   3.5991624e+00   4.3913205e+00
   2.5228498e+01  -2.7279614e+01   2.5000000e+02  -5.4951418e+00   3.4784105e+00   4.3157087e+00
   2.5324001e+01  -2.7182650e+01   2.5000000e+02  -5.5187308e+00   3.3652168e+00   4.2072646e+00
   2.5415073e+01  -2.7082429e+01   2.5000000e+02  -5.5441637e+00   3.2600007e+00   4.0678329e+00
   2.5501585e+01  -2.6979111e+01   2.5000000e+02  -5.5712196e+00   3.1628500e+00   3.8991378e+00
   2.5583414e+01  -2.6872856e+01   2.5000000e+02  -5.5993870e+00   3.0735329e+00   3.7027208e+00
   2.5660449e+01  -2.6763829e+01   2.5000000e+02  -5.6277446e+00   2.9915159e+00   3.4799902e+00
   2.5732583e+01  -2.6652200e+01   2.5000000e+02  -5.6548820e+00   2.9160625e+00   3.2322851e+00
   2.5799720e+01  -2.6538143e+01   2.5000000e+02  -5.6788698e+00   2.8463259e+00   2.9610299e+00
   2.5861772e+01  -2.6421832e+01   2.5000000e+02  -5.6973346e+00   2.7814658e+00   2.6678932e+00
   2.5918660e+01  -2.6303447e+01   2.5000000e+02  -5.7076280e+00   2.7207265e+00   2.3549745e+00
   2.5970313e+01  -2.6183169e+01   2.5000000e+02  -5.7070839e+00   2.6634843e+00   2.0248803e+00
   2.6016669e+01  -2.6061182e+01   2.5000000e+02  -5.6933067e+00   2.6092452e+00   1.6807220e+00
   2.6057675e+01  -2.5937671e+01   2.5000000e+02  -5.6644382e+00   2.5576105e+00   1.3259831e+00
   2.6093286e+01  -2.5812825e+01   2.5000000e+02  -5.6193538e+00   2.5082228e+00   9.6430609e-01
   2.6123465e+01  -2.5686832e+01   2.5000000e+02  -5.5577561e+00   2.4607018e+00   5.9920061e-01
   2.6148185e+01  -2.5559882e+01   2.5000000e+02  -5.4801611e+00   2.4145780e+00   2.3377423e-01
   2.6167426e+01  -2.5432165e+01   2.5000000e+02  -5.3877833e+00   2.3692331e+00  -1.2952970e-01
   2.6181176e+01  -2.5303873e+01   2.5000000e+02  -5.2823371e+00   2.3238358e+00  -4.8911426e-01
   2.6189434e+01  -2.5175198e+01   2.5000000e+02  -5.1657658e+00   2.2772702e+00  -8.4433625e-01
   2.6192204e+01  -2.5046330e+01   2.5000000e+02  -5.0399141e+00   2.2280750e+00  -1.1955175e+00
   2.6189500e+01  -2.4917461e+01   2.5000000e+02  -4.9061836e+00   2.1743781e+00  -1.5437895e+00
   2.6181342e+01  -2.4788782e+01   2.5000000e+02  -4.7652030e+00   2.1138620e+00  -1.8908214e+00
   2.6167759e+01  -2.4660481e+01   2.5000000e+02  -4.6165882e+00   2.0437617e+00  -2.2383902e+00
   2.6148789e+01  -2.4532749e+01   2.5000000e+02  -4.4588667e+00   1.9609294e+00  -2.5878326e+00
   2.6124475e+01  -2.4405771e+01   2.5000000e+02  -4.2895902e+00   1.8619608e+00  -2.9395226e+00
   2.6094868e+01  -2.4279733e+01   2.5000000e+02  -4.1056857e+00   1.7433965e+00  -3.2923812e+00
   2.6060027e+01  -2.4154819e+01   2.5000000e+02  -3.9039728e+00   1.6019728e+00  -3.6436070e+00
   2.6020018e+01  -2.4031210e+01   2.5000000e+02  -3.6817682e+00   1.4348958e+00  -3.9886700e+00
   2.5974912e+01  -2.3909085e+01   2.5000000e+02  -3.4374600e+00   1.2400992e+00  -4.3215918e+00
   2.5924790e+01  -2.3788621e+01   2.5000000e+02  -3.1709358e+00   1.0164417e+00  -4.6354617e+00
   2.5869736e+01  -2.3669991e+01   2.5000000e+02  -2.8837504e+00   7.6380763e-01  -4.9231236e+00
   2.5809843e+01  -2.3553365e+01   2.5000000e+02  -2.5790400e+00   4.8311393e-01  -5.1778467e+00
   2.5745208e+01  -2.3438912e+01   2.5000000e+02  -2.2611798e+00   1.7622467e-01  -5.3938963e+00
   2.5675937e+01  -2.3326794e+01   2.5000000e+02  -1.9352935e+00  -1.5420518e-01  -5.5668888e+00
   2.5602138e+01  -2.3217172e+01   2.5000000e+02  -1.6067237e+00  -5.0489657e-01  -5.6939060e+00
   2.5523926e+01  -2.3110201e+01   2.5000000e+02  -1.2805847e+00  -8.7211656e-01  -5.7733933e+00
   2.5441424e+01  -2.3006035e+01   2.5000000e+02  -9.6147636e-01  -1.2518009e+00  -5.8049253e+00
   2.5354757e+01  -2.2904819e+01   2.5000000e+02  -6.5334032e-01  -1.6396896e+00  -5.7889372e+00
   2.5264056e+01  -2.2806699e+01   2.5000000e+02  -3.5951842e-01  -2.0313869e+00  -5.7264886e+00
   2.5169457e+01  -2.2711812e+01   2.5000000e+02  -8.2874884e-02  -2.4224725e+00  -5.6191204e+00
   2.5071102e+01  -2.2620292e+01   2.5000000e+02   1.7402376e-01  -2.8085892e+00  -5.4688175e+00
   2.4969133e+01  -2.2532269e+01   2.5000000e+02   4.0877634e-01  -3.1855886e+00  -5.2780474e+00
   2.4863703e+01  -2.2447865e+01   2.5000000e+02   6.1904703e-01  -3.5496836e+00  -5.0498426e+00
   2.4754962e+01  -2.2367199e+01   2.5000000e+02   8.0259274e-01  -3.8976621e+00  -4.7878581e+00
   2.4643070e+01  -2.2290385e+01   2.5000000e+02   9.5732861e-01  -4.2270789e+00  -4.4963804e+00
   2.4528186e+01  -2.2217530e+01   2.5000000e+02   1.0814972e+00  -4.5364813e+00  -4.1802029e+00
   2.4410476e+01  -2.2148736e+01   2.5000000e+02   1.1738427e+00  -4.8255428e+00  -3.8444092e+00
   2.4290106e+01  -2.2084099e+01   2.5000000e+02   1.2338063e+00  -5.0951391e+00  -3.4940173e+00
   2.4167247e+01  -2.2023709e+01   2.5000000e+02   1.2616715e+00  -5.3472727e+00  -3.1335751e+00
   2.4042073e+01  -2.1967650e+01   2.5000000e+02   1.2586558e+00  -5.5848668e+00  -2.7667383e+00
   2.3914760e+01  -2.1916000e+01   2.5000000e+02   1.2269212e+00  -5.8114259e+00  -2.3959185e+00
   2.3785486e+01  -2.1868832e+01   2.5000000e+02   1.1695083e+00  -6.0306051e+00  -2.0220704e+00
   2.3654432e+01  -2.1826210e+01   2.5000000e+02   1.0901973e+00  -6.2457521e+00  -1.6446492e+00
   2.3521781e+01  -2.1788195e+01   2.5000000e+02   9.9334066e-01  -6.4594965e+00  -1.2617513e+00
   2.3387718e+01  -2.1754838e+01   2.5000000e+02   8.8365633e-01  -6.6734343e+00  -8.7038487e-01
   2.3252428e+01  -2.1726186e+01   2.5000000e+02   7.6604079e-01  -6.8879457e+00  -4.6683573e-01
   2.3116098e+01  -2.1702278e+01   2.5000000e+02   6.4538096e-01  -7.1021281e+00  -4.7063999e-02
   2.2978918e+01  -2.1683149e+01   2.5000000e+02   5.2640275e-01  -7.3138378e+00   3.9291114e-01
   2.2841078e+01  -2.1668824e+01   2.5000000e+02   4.1352232e-01  -7.5198005e+00   8.5668191e-01
   2.2702767e+01  -2.1659323e+01   2.5000000e+02   3.1075010e-01  -7.7157659e+00   1.3471604e+00
   2.2564176e+01  -2.1654660e+01   2.5000000e+02   2.2161852e-01  -7.8966758e+00   1.8663133e+00
   2.2425496e+01  -2.1654840e+01   2.5000000e+02   1.4913655e-01  -8.0568596e+00   2.4149387e+00
   2.2286920e+01  -2.1659864e+01   2.5000000e+02   9.5803013e-02  -8.1902604e+00   2.9924574e+00
   2.2148637e+01  -2.1669725e+01   2.5000000e+02   6.3625827e-02  -8.2907070e+00   3.5967639e+00
   2.2010839e+01  -2.1684408e+01   2.5000000e+02   5.4181358e-02  -8.3522317e+00   4.2240761e+00
   2.1873716e+01  -2.1703895e+01   2.5000000e+02   6.8696260e-02  -8.3694549e+00   4.8689195e+00
   2.1737458e+01  -2.1728157e+01   2.5000000e+02   1.0809456e-01  -8.3379956e+00   5.5241794e+00
   2.1602252e+01  -2.1757160e+01   2.5000000e+02   1.7307354e-01  -8.2548875e+00   6.1813227e+00
   2.1468288e+01  -2.1790866e+01   2.5000000e+02   2.6414983e-01  -8.1189424e+00   6.8307140e+00
   2.1335749e+01  -2.1829227e+01   2.5000000e+02   3.8165471e-01  -7.9309879e+00   7.4621192e+00
   2.1204822e+01  -2.1872189e+01   2.5000000e+02   5.2574164e-01  -7.6939676e+00   8.0652012e+00
   2.1075688e+01  -2.1919694e+01   2.5000000e+02   6.9636337e-01  -7.4128265e+00   8.6301221e+00
   2.0948528e+01  -2.1971674e+01   2.5000000e+02   8.9320338e-01  -7.0942386e+00   9.1480109e+00
   2.0823520e+01  -2.2028059e+01   2.5000000e+02   1.1156468e+00  -6.7461786e+00   9.6113658e+00
   2.0700841e+01  -2.2088768e+01   2.5000000e+02   1.3626817e+00  -6.3774229e+00   1.0014273e+01
   2.0580663e+01  -2.2153718e+01   2.5000000e+02   1.6328736e+00  -5.9970234e+00   1.0352494e+01
   2.0463158e+01  -2.2222818e+01   2.5000000e+02   1.9242880e+00  -5.6138580e+00   1.0623383e+01
   2.0348491e+01  -2.2295971e+01   2.5000000e+02   2.2344578e+00  -5.2362360e+00   1.0825733e+01
   2.0236828e+01  -2.2373076e+01   2.5000000e+02   2.5603670e+00  -4.8716633e+00   1.0959543e+01
   2.0128329e+01  -2.2454024e+01   2.5000000e+02   2.8984257e+00  -4.5266617e+00   1.1025819e+01
   2.0023151e+01  -2.2538701e+01   2.5000000e+02   3.2444996e+00  -4.2067073e+00   1.1026375e+01
   1.9921446e+01  -2.2626990e+01   2.5000000e+02   3.5939636e+00  -3.9162093e+00   1.0963703e+01
   1.9823365e+01  -2.2718765e+01   2.5000000e+02   3.9417584e+00  -3.6585376e+00   1.0840896e+01
   1.9729052e+01  -2.2813897e+01   2.5000000e+02   4.2825389e+00  -3.4360352e+00   1.0661601e+01
   1.9638647e+01  -2.2912253e+01   2.5000000e+02   4.6108377e+00  -3.2500641e+00   1.0429991e+01
   1.9552286e+01  -2.3013693e+01   2.5000000e+02   4.9212554e+00  -3.1010461e+00   1.0150735e+01
   1.9470099e+01  -2.3118074e+01   2.5000000e+02   5.2086993e+00  -2.9885186e+00   9.8289182e+00
   1.9392212e+01  -2.3225247e+01   2.5000000e+02   5.4685954e+00  -2.9112210e+00   9.4699330e+00
   1.9318746e+01  -2.3335061e+01   2.5000000e+02   5.6970951e+00  -2.8672093e+00   9.0793086e+00
   1.9249816e+01  -2.3447358e+01   2.5000000e+02   5.8911985e+00  -2.8539880e+00   8.6625350e+00
   1.9185531e+01  -2.3561979e+01   2.5000000e+02   6.0488389e+00  -2.8686784e+00   8.2248335e+00
   1.9125995e+01  -2.3678760e+01   2.5000000e+02   6.1688523e+00  -2.9081790e+00   7.7709778e+00
   1.9071306e+01  -2.3797532e+01   2.5000000e+02   6.2508717e+00  -2.9693117e+00   7.3051413e+00
   1.9021554e+01  -2.3918126e+01   2.5000000e+02   6.2951485e+00  -3.0489455e+00   6.8307902e+00
   1.8976826e+01  -2.4040367e+01   2.5000000e+02   6.3023222e+00  -3.1440812e+00   6.3507007e+00
   1.8937199e+01  -2.4164080e+01   2.5000000e+02   6.2731746e+00  -3.2518846e+00   5.8670306e+00
   1.8902746e+01  -2.4289084e+01   2.5000000e+02   6.2084301e+00  -3.3697008e+00   5.3815095e+00
   1.8873531e+01  -2.4415198e+01   2.5000000e+02   6.1086183e+00  -3.4950379e+00   4.8956520e+00
   1.8849613e+01  -2.4542239e+01   2.5000000e+02   5.9740469e+00  -3.6255555e+00   4.4110117e+00
   1.8831043e+01  -2.4670020e+01   2.5000000e+02   5.8048770e+00  -3.7590401e+00   3.9294246e+00
   1.8817863e+01  -2.4798355e+01   2.5000000e+02   5.6012885e+00  -3.8934117e+00   3.4531565e+00
   1.8810111e+01  -2.4927055e+01   2.5000000e+02   5.3637186e+00  -4.0267502e+00   2.9849756e+00
   1.8807813e+01  -2.5055931e+01   2.5000000e+02   5.0930938e+00  -4.1573081e+00   2.5281235e+00
   1.8810992e+01  -2.5184791e+01   2.5000000e+02   4.7910621e+00  -4.2835710e+00   2.0861549e+00
   1.8819658e+01  -2.5313444e+01   2.5000000e+02   4.4601278e+00  -4.4042697e+00   1.6627187e+00
   1.8833818e+01  -2.5441700e+01   2.5000000e+02   4.1037209e+00  -4.5184319e+00   1.2612315e+00
   1.8853467e+01  -2.5569366e+01   2.5000000e+02   3.7261622e+00  -4.6253612e+00   8.8458387e-01
   1.8878595e+01  -2.5696251e+01   2.5000000e+02   3.3325043e+00  -4.7246386e+00   5.3476959e-01
   1.8909179e+01  -2.5822166e+01   2.5000000e+02   2.9282728e+00  -4.8160480e+00   2.1261984e-01
   1.8945193e+01  -2.5946919e+01   2.5000000e+02   2.5191368e+00  -4.8995113e+00  -8.2437500e-02
   1.8986599e+01  -2.6070322e+01   2.5000000e+02   2.1104754e+00  -4.9749457e+00  -3.5244698e-01
   1.9033352e+01  -2.6192188e+01   2.5000000e+02   1.7069595e+00  -5.0421280e+00  -6.0086172e-01
   1.9085398e+01  -2.6312332e+01   2.5000000e+02   1.3121641e+00  -5.1005374e+00  -8.3228179e-01
   1.9142673e+01  -2.6430569e+01   2.5000000e+02   9.2829373e-01  -5.1492227e+00  -1.0520253e+00
   1.9205107e+01  -2.6546718e+01   2.5000000e+02   5.5604696e-01  -5.1867234e+00  -1.2655932e+00
   1.9272619e+01  -2.6660601e+01   2.5000000e+02   1.9468972e-01  -5.2110514e+00  -1.4780433e+00
   1.9345121e+01  -2.6772041e+01   2.5000000e+02  -1.5768290e-01  -5.2197818e+00  -1.6934337e+00
   1.9422517e+01  -2.6880867e+01   2.5000000e+02  -5.0374308e-01  -5.2102193e+00  -1.9143672e+00
   1.9504699e+01  -2.6986910e+01   2.5000000e+02  -8.4639914e-01  -5.1796423e+00  -2.1417230e+00
   1.9591555e+01  -2.7090003e+01   2.5000000e+02  -1.1882650e+00  -5.1255914e+00  -2.3746738e+00
   1.9682962e+01  -2.7189986e+01   2.5000000e+02  -1.5311822e+00  -5.0461136e+00  -2.6108785e+00
   1.9778789e+01  -2.7286702e+01   2.5000000e+02  -1.8758565e+00  -4.9399542e+00  -2.8469231e+00
   1.9878898e+01  -2.7379999e+01   2.5000000e+02  -2.2216809e+00  -4.8066166e+00  -3.0788704e+00
   1.9983142e+01  -2.7469729e+01   2.5000000e+02  -2.5667393e+00  -4.6462809e+00  -3.3028196e+00
   2.0091368e+01  -2.7555751e+01   2.5000000e+02  -2.9080043e+00  -4.4595821e+00  -3.5153866e+00
   2.0203413e+01  -2.7637929e+01   2.5000000e+02  -3.2416474e+00  -4.2473046e+00  -3.7139817e+00
   2.0319108e+01  -2.7716131e+01   2.5000000e+02  -3.5634333e+00  -4.0100533e+00  -3.8968778e+00
   2.0438279e+01  -2.7790233e+01   2.5000000e+02  -3.8691182e+00  -3.7479766e+00  -4.0630162e+00
   2.0560741e+01  -2.7860116e+01   2.5000000e+02  -4.1547618e+00  -3.4606433e+00  -4.2116260e+00
   2.1165322e+01  -2.8262981e+01   2.5000000e+02  -5.3189587e+00  -1.6848411e+00  -4.1607910e+00
   2.1302850e+01  -2.8305387e+01   2.5000000e+02  -5.4298505e+00  -1.2582661e+00  -4.1758537e+00
   2.1442164e+01  -2.8343157e+01   2.5000000e+02  -5.5103322e+00  -8.0210077e-01  -4.1552400e+00
   2.1583055e+01  -2.8376234e+01   2.5000000e+02  -5.5614843e+00  -3.1871477e-01  -4.0926651e+00
   2.1725317e+01  -2.8404569e+01   2.5000000e+02  -5.5851636e+00   1.8801974e-01  -3.9816343e+00
   2.1868736e+01  -2.8428119e+01   2.5000000e+02  -5.5840085e+00   7.1249697e-01  -3.8158385e+00
   2.2013100e+01  -2.8446848e+01   2.5000000e+02  -5.5613845e+00   1.2472616e+00  -3.5896860e+00
   2.2158193e+01  -2.8460729e+01   2.5000000e+02  -5.5212584e+00   1.7829644e+00  -3.2989797e+00
   2.2303797e+01  -2.8469741e+01   2.5000000e+02  -5.4680074e+00   2.3085778e+00  -2.9417031e+00
   2.2449696e+01  -2.8473871e+01   2.5000000e+02  -5.4061832e+00   2.8119185e+00  -2.5187449e+00
   2.2595669e+01  -2.8473111e+01   2.5000000e+02  -5.3402592e+00   3.2804354e+00  -2.0344625e+00
   2.2741500e+01  -2.8467463e+01   2.5000000e+02  -5.2743729e+00   3.7022666e+00  -1.4968175e+00
   2.2886969e+01  -2.8456936e+01   2.5000000e+02  -5.2121033e+00   4.0672899e+00  -9.1713524e-01
   2.3031858e+01  -2.8441545e+01   2.5000000e+02  -5.1562942e+00   4.3680826e+00  -3.0936253e-01
   2.3175951e+01  -2.8421314e+01   2.5000000e+02  -5.1089414e+00   4.6005489e+00   3.1101127e-01
   2.3319033e+01  -2.8396273e+01   2.5000000e+02  -5.0711650e+00   4.7641444e+00   9.2817611e-01
   2.3460892e+01  -2.8366459e+01   2.5000000e+02  -5.0432558e+00   4.8616831e+00   1.5272160e+00
   2.3601315e+01  -2.8331918e+01   2.5000000e+02  -5.0247968e+00   4.8987881e+00   2.0950954e+00
   2.3740095e+01  -2.8292700e+01   2.5000000e+02  -5.0148480e+00   4.8831184e+00   2.6213619e+00
   2.3877028e+01  -2.8248866e+01   2.5000000e+02  -5.0121457e+00   4.8234876e+00   3.0984700e+00
   2.4011913e+01  -2.8200479e+01   2.5000000e+02  -5.0153341e+00   4.7290353e+00   3.5217305e+00
   2.4144550e+01  -2.8147613e+01   2.5000000e+02  -5.0231358e+00   4.6085273e+00   3.8890278e+00
   2.4274749e+01  -2.8090347e+01   2.5000000e+02  -5.0344944e+00   4.4698475e+00   4.2003547e+00
   2.4402319e+01  -2.8028764e+01   2.5000000e+02  -5.0486627e+00   4.3197276e+00   4.4572007e+00
   2.4527078e+01  -2.7962957e+01   2.5000000e+02  -5.0651959e+00   4.1636369e+00   4.6620521e+00
   2.4648847e+01  -2.7893024e+01   2.5000000e+02  -5.0839306e+00   4.0058612e+00   4.8178733e+00
   2.4767452e+01  -2.7819066e+01   2.5000000e+02  -5.1049147e+00   3.8496702e+00   4.9277414e+00
   2.4882727e+01  -2.7741195e+01   2.5000000e+02  -5.1282979e+00   3.6975161e+00   4.9946433e+00
   2.4994510e+01  -2.7659523e+01   2.5000000e+02  -5.1542754e+00   3.5512715e+00   5.0213130e+00
   2.5102647e+01  -2.7574171e+01   2.5000000e+02  -5.1830013e+00   3.4123880e+00   5.0102533e+00
   2.5206988e+01  -2.7485263e+01   2.5000000e+02  -5.2145715e+00   3.2820310e+00   4.9637476e+00
   2.5307391e+01  -2.7392930e+01   2.5000000e+02  -5.2490061e+00   3.1611139e+00   4.8839419e+00
   2.5403722e+01  -2.7297305e+01   2.5000000e+02  -5.2862652e+00   3.0502928e+00   4.7728669e+00
   2.5495852e+01  -2.7198528e+01   2.5000000e+02  -5.3262413e+00   2.9499178e+00   4.6324456e+00
   2.5583660e+01  -2.7096740e+01   2.5000000e+02  -5.3687282e+00   2.8599799e+00   4.4644385e+00
   2.5667033e+01  -2.6992090e+01   2.5000000e+02  -5.4133302e+00   2.7800773e+00   4.2704105e+00
   2.5745863e+01  -2.6884727e+01   2.5000000e+02  -5.4593534e+00   2.7094527e+00   4.0516695e+00
   2.5820052e+01  -2.6774804e+01   2.5000000e+02  -5.5056660e+00   2.6470537e+00   3.8093234e+00
   2.5889508e+01  -2.6662480e+01   2.5000000e+02  -5.5506062e+00   2.5916559e+00   3.5443981e+00
   2.5954147e+01  -2.6547913e+01   2.5000000e+02  -5.5919749e+00   2.5419932e+00   3.2580044e+00
   2.6013892e+01  -2.6431267e+01   2.5000000e+02  -5.6271279e+00   2.4968712e+00   2.9515765e+00
   2.6068675e+01  -2.6312706e+01   2.5000000e+02  -5.6531866e+00   2.4552474e+00   2.6270369e+00
   2.6118434e+01  -2.6192397e+01   2.5000000e+02  -5.6673220e+00   2.4162706e+00   2.2868975e+00
   2.6163116e+01  -2.6070510e+01   2.5000000e+02  -5.6670608e+00   2.3792710e+00   1.9342384e+00
   2.6202673e+01  -2.5947215e+01   2.5000000e+02  -5.6505571e+00   2.3437345e+00   1.5725454e+00
   2.6237069e+01  -2.5822683e+01   2.5000000e+02  -5.6167770e+00   2.3092437e+00   1.2054843e+00
   2.6266271e+01  -2.5697088e+01   2.5000000e+02  -5.5655799e+00   2.2754412e+00   8.3661050e-01
   2.6290256e+01  -2.5570605e+01   2.5000000e+02  -5.4976899e+00   2.2419689e+00   4.6908638e-01
   2.6309007e+01  -2.5443407e+01   2.5000000e+02  -5.4145710e+00   2.2084199e+00   1.0541511e-01
   2.6322517e+01  -2.5315670e+01   2.5000000e+02  -5.3182298e+00   2.1742723e+00  -2.5273248e-01
   2.6330782e+01  -2.5187569e+01   2.5000000e+02  -5.2109470e+00   2.1388216e+00  -6.0466090e-01
   2.6333808e+01  -2.5059280e+01   2.5000000e+02  -5.0949620e+00   2.1010884e+00  -9.5066225e-01
   2.6331608e+01  -2.4930976e+01   2.5000000e+02  -4.9721199e+00   2.0597321e+00  -1.2919405e+00
   2.6324201e+01  -2.4802834e+01   2.5000000e+02  -4.8435378e+00   2.0129788e+00  -1.6303636e+00
   2.6311613e+01  -2.4675025e+01   2.5000000e+02  -4.7093211e+00   1.9585748e+00  -1.9681124e+00
   2.6293876e+01  -2.4547724e+01   2.5000000e+02  -4.5684322e+00   1.8938033e+00  -2.3071644e+00
   2.6271031e+01  -2.4421101e+01   2.5000000e+02  -4.4187317e+00   1.8155612e+00  -2.6487664e+00
   2.6243123e+01  -2.4295326e+01   2.5000000e+02  -4.2572413e+00   1.7205237e+00  -2.9929260e+00
   2.6210204e+01  -2.4170568e+01   2.5000000e+02  -4.0805976e+00   1.6053705e+00  -3.3380493e+00
   2.6172332e+01  -2.4046993e+01   2.5000000e+02  -3.8856244e+00   1.4670542e+00  -3.6808165e+00
   2.6129572e+01  -2.3924766e+01   2.5000000e+02  -3.6699307e+00   1.3030775e+00  -4.0163163e+00
   2.6081993e+01  -2.3804049e+01   2.5000000e+02  -3.4323994e+00   1.1117238e+00  -4.3384573e+00
   2.6029673e+01  -2.3685003e+01   2.5000000e+02  -3.1734908e+00   8.9221680e-01  -4.6405425e+00
   2.5972691e+01  -2.3567783e+01   2.5000000e+02  -2.8952590e+00   6.4476416e-01  -4.9159511e+00
   2.5911136e+01  -2.3452546e+01   2.5000000e+02  -2.6011563e+00   3.7053192e-01  -5.1587119e+00
   2.5845100e+01  -2.3339442e+01   2.5000000e+02  -2.2955929e+00   7.1506724e-02  -5.3639637e+00
   2.5774679e+01  -2.3228620e+01   2.5000000e+02  -1.9834407e+00  -2.4965102e-01  -5.5281519e+00
   2.5699977e+01  -2.3120225e+01   2.5000000e+02  -1.6695559e+00  -5.8976662e-01  -5.6490124e+00
   2.5621100e+01  -2.3014399e+01   2.5000000e+02  -1.3584065e+00  -9.4528968e-01  -5.7253945e+00
   2.5538160e+01  -2.2911279e+01   2.5000000e+02  -1.0538855e+00  -1.3123929e+00  -5.7569949e+00
   2.5451275e+01  -2.2810999e+01   2.5000000e+02  -7.5929144e-01  -1.6870368e+00  -5.7441076e+00
   2.5360563e+01  -2.2713691e+01   2.5000000e+02  -4.7742397e-01  -2.0650361e+00  -5.6874522e+00
   2.5266151e+01  -2.2619479e+01   2.5000000e+02  -2.1077146e-01  -2.4421236e+00  -5.5881047e+00
   2.5168167e+01  -2.2528487e+01   2.5000000e+02   3.8319390e-02  -2.8140362e+00  -5.4475388e+00
   2.5066744e+01  -2.2440831e+01   2.5000000e+02   2.6750919e-01  -3.1766493e+00  -5.2677280e+00
   2.4962018e+01  -2.2356625e+01   2.5000000e+02   4.7440890e-01  -3.5261320e+00  -5.0512802e+00
   2.4854130e+01  -2.2275976e+01   2.5000000e+02   6.5660705e-01  -3.8591515e+00  -4.8015367e+00
   2.4743223e+01  -2.2198990e+01   2.5000000e+02   8.1177947e-01  -4.1730909e+00  -4.5226045e+00
   2.4629442e+01  -2.2125764e+01   2.5000000e+02   9.3785303e-01  -4.4662840e+00  -4.2192600e+00
   2.4512939e+01  -2.2056393e+01   2.5000000e+02   1.0331941e+00  -4.7381832e+00  -3.8967550e+00
   2.4393864e+01  -2.1990966e+01   2.5000000e+02   1.0968136e+00  -4.9894922e+00  -3.5604587e+00
   2.4272374e+01  -2.1929566e+01   2.5000000e+02   1.1285188e+00  -5.2221432e+00  -3.2154471e+00
   2.4148626e+01  -2.1872271e+01   2.5000000e+02   1.1290256e+00  -5.4391572e+00  -2.8660322e+00
   2.4022779e+01  -2.1819156e+01   2.5000000e+02   1.0999887e+00  -5.6443449e+00  -2.5153517e+00
   2.3894996e+01  -2.1770288e+01   2.5000000e+02   1.0439512e+00  -5.8418944e+00  -2.1650639e+00
   2.3765441e+01  -2.1725729e+01   2.5000000e+02   9.6423411e-01  -6.0359030e+00  -1.8152099e+00
   2.3634279e+01  -2.1685536e+01   2.5000000e+02   8.6477607e-01  -6.2299173e+00  -1.4642621e+00
   2.3501680e+01  -2.1649760e+01   2.5000000e+02   7.4994864e-01  -6.4265392e+00  -1.1093498e+00
   2.3367810e+01  -2.1618447e+01   2.5000000e+02   6.2436707e-01  -6.6271731e+00  -7.4657566e-01
   2.3232841e+01  -2.1591636e+01   2.5000000e+02   4.9271493e-01  -6.8318713e+00  -3.7143938e-01
   2.3096944e+01  -2.1569362e+01   2.5000000e+02   3.5959044e-01  -7.0393322e+00   2.0769041e-02
   2.2960291e+01  -2.1551654e+01   2.5000000e+02   2.2937080e-01  -7.2469714e+00   4.3458495e-01
   2.2823057e+01  -2.1538532e+01   2.5000000e+02   1.0609850e-01  -7.4510522e+00   8.7402473e-01
   2.2685413e+01  -2.1530015e+01   2.5000000e+02  -6.5887486e-03  -7.6468735e+00   1.3423211e+00
   2.2547535e+01  -2.1526113e+01   2.5000000e+02  -1.0552157e-01  -7.8289425e+00   1.8416421e+00
   2.2409597e+01  -2.1526832e+01   2.5000000e+02  -1.8801467e-01  -7.9912016e+00   2.3729001e+00
   2.2271773e+01  -2.1532169e+01   2.5000000e+02  -2.5186822e-01  -8.1272632e+00   2.9355557e+00
   2.2134238e+01  -2.1542118e+01   2.5000000e+02  -2.9531712e-01  -8.2306930e+00   3.5274739e+00
   2.1997165e+01  -2.1556667e+01   2.5000000e+02  -3.1698456e-01  -8.2953357e+00   4.1448449e+00
   2.1860729e+01  -2.1575798e+01   2.5000000e+02  -3.1581596e-01  -8.3156833e+00   4.7821587e+00
   2.1725102e+01  -2.1599485e+01   2.5000000e+02  -2.9102341e-01  -8.2872713e+00   5.4323229e+00
   2.1590456e+01  -2.1627699e+01   2.5000000e+02  -2.4201503e-01  -8.2070676e+00   6.0868791e+00
   2.1456963e+01  -2.1660403e+01   2.5000000e+02  -1.6836830e-01  -8.0738028e+00   6.7363489e+00
   2.1324792e+01  -2.1697557e+01   2.5000000e+02  -6.9791120e-02  -7.8881908e+00   7.3707157e+00
   2.1194112e+01  -2.1739113e+01   2.5000000e+02   5.3870129e-02  -7.6529993e+00   7.9799318e+00
   2.1065091e+01  -2.1785018e+01   2.5000000e+02   2.0262796e-01  -7.3729425e+00   8.5544624e+00
   2.0937892e+01  -2.1835213e+01   2.5000000e+02   3.7632193e-01  -7.0543939e+00   9.0857747e+00
   2.0812680e+01  -2.1889635e+01   2.5000000e+02   5.7458317e-01  -6.7049921e+00   9.5666712e+00
   2.0689616e+01  -2.1948213e+01   2.5000000e+02   7.9676574e-01  -6.3331418e+00   9.9915211e+00
   2.0568860e+01  -2.2010874e+01   2.5000000e+02   1.0419106e+00  -5.9475287e+00   1.0356309e+01
   2.0450568e+01  -2.2077536e+01   2.5000000e+02   1.3086622e+00  -5.5566669e+00   1.0658556e+01
   2.0334895e+01  -2.2148115e+01   2.5000000e+02   1.5952467e+00  -5.1685565e+00   1.0897140e+01
   2.0221992e+01  -2.2222520e+01   2.5000000e+02   1.8994149e+00  -4.7904289e+00   1.1072068e+01
   2.0112007e+01  -2.2300655e+01   2.5000000e+02   2.2184284e+00  -4.4286095e+00   1.1184238e+01
   2.0005087e+01  -2.2382421e+01   2.5000000e+02   2.5490628e+00  -4.0884681e+00   1.1235226e+01
   1.9901373e+01  -2.2467711e+01   2.5000000e+02   2.8876000e+00  -3.7744017e+00   1.1227135e+01
   1.9801004e+01  -2.2556416e+01   2.5000000e+02   3.2298933e+00  -3.4898812e+00   1.1162485e+01
   1.9704116e+01  -2.2648422e+01   2.5000000e+02   3.5714213e+00  -3.2374901e+00   1.1044165e+01
   1.9610841e+01  -2.2743609e+01   2.5000000e+02   3.9073861e+00  -3.0189612e+00   1.0875423e+01
   1.9521305e+01  -2.2841855e+01   2.5000000e+02   4.2328639e+00  -2.8352123e+00   1.0659855e+01
   1.9435633e+01  -2.2943031e+01   2.5000000e+02   4.5429548e+00  -2.6863975e+00   1.0401410e+01
   1.9353944e+01  -2.3047007e+01   2.5000000e+02   4.8329885e+00  -2.5719484e+00   1.0104343e+01
   1.9276353e+01  -2.3153647e+01   2.5000000e+02   5.0986938e+00  -2.4906470e+00   9.7731572e+00
   1.9202970e+01  -2.3262812e+01   2.5000000e+02   5.3363796e+00  -2.4407211e+00   9.4124919e+00
   1.9133901e+01  -2.3374359e+01   2.5000000e+02   5.5430668e+00  -2.4199647e+00   9.0269880e+00
   1.9069247e+01  -2.3488141e+01   2.5000000e+02   5.7165680e+00  -2.4258678e+00   8.6211357e+00
   1.9009104e+01  -2.3604011e+01   2.5000000e+02   5.8555092e+00  -2.4557572e+00   8.1991040e+00
   1.8953562e+01  -2.3721815e+01   2.5000000e+02   5.9592533e+00  -2.5069017e+00   7.7646339e+00
   1.8902707e+01  -2.3841398e+01   2.5000000e+02   6.0277882e+00  -2.5766215e+00   7.3209173e+00
   1.8856619e+01  -2.3962601e+01   2.5000000e+02   6.0615356e+00  -2.6623385e+00   6.8705710e+00
   1.8815371e+01  -2.4085264e+01   2.5000000e+02   6.0611418e+00  -2.7616052e+00   6.4156573e+00
   1.8779032e+01  -2.4209225e+01   2.5000000e+02   6.0272741e+00  -2.8721121e+00   5.9577886e+00
   1.8747664e+01  -2.4334317e+01   2.5000000e+02   5.9604552e+00  -2.9916574e+00   5.4983135e+00
   1.8721324e+01  -2.4460373e+01   2.5000000e+02   5.8609820e+00  -3.1181420e+00   5.0385035e+00
   1.8700062e+01  -2.4587226e+01   2.5000000e+02   5.7289296e+00  -3.2495488e+00   4.5797772e+00
   1.8683922e+01  -2.4714703e+01   2.5000000e+02   5.5642629e+00  -3.3839350e+00   4.1239137e+00
   1.8672941e+01  -2.4842634e+01   2.5000000e+02   5.3670121e+00  -3.5194565e+00   3.6731464e+00
   1.8667150e+01  -2.4970845e+01   2.5000000e+02   5.1375079e+00  -3.6543844e+00   3.2302265e+00
   1.8666572e+01  -2.5099163e+01   2.5000000e+02   4.8766061e+00  -3.7871378e+00   2.7983501e+00
   1.8671226e+01  -2.5227412e+01   2.5000000e+02   4.5858957e+00  -3.9163234e+00   2.3810075e+00
   1.8681121e+01  -2.5355419e+01   2.5000000e+02   4.2678149e+00  -4.0407535e+00   1.9817491e+00
   1.8696260e+01  -2.5483007e+01   2.5000000e+02   3.9257187e+00  -4.1594731e+00   1.6039078e+00
   1.8716639e+01  -2.5610002e+01   2.5000000e+02   3.5638120e+00  -4.2717719e+00   1.2502653e+00
   1.8742248e+01  -2.5736228e+01   2.5000000e+02   3.1870116e+00  -4.3771754e+00   9.2274484e-01
   1.8773067e+01  -2.5861510e+01   2.5000000e+02   2.8006857e+00  -4.4754030e+00   6.2213757e-01
   1.8809070e+01  -2.5985676e+01   2.5000000e+02   2.4103125e+00  -4.5663182e+00   3.4788467e-01
   1.8850225e+01  -2.6108553e+01   2.5000000e+02   2.0210949e+00  -4.6498353e+00   9.7998032e-02
   1.8896490e+01  -2.6229968e+01   2.5000000e+02   1.6375455e+00  -4.7257929e+00  -1.3086620e-01
   1.8947817e+01  -2.6349751e+01   2.5000000e+02   1.2631018e+00  -4.7938324e+00  -3.4319322e-01
   1.9004149e+01  -2.6467735e+01   2.5000000e+02   8.9984822e-01  -4.8532641e+00  -5.4420981e-01
   1.9065423e+01  -2.6583752e+01   2.5000000e+02   5.4839251e-01  -4.9029811e+00  -7.3938656e-01
   1.9131567e+01  -2.6697639e+01   2.5000000e+02   2.0789214e-01  -4.9414092e+00  -9.3385971e-01
   1.9202504e+01  -2.6809234e+01   2.5000000e+02  -1.2371478e-01  -4.9665511e+00  -1.1318935e+00
   1.9278145e+01  -2.6918377e+01   2.5000000e+02  -4.4932868e-01  -4.9760900e+00  -1.3363995e+00
   1.9358398e+01  -2.7024914e+01   2.5000000e+02  -7.7221984e-01  -4.9675919e+00  -1.5486744e+00
   1.9443161e+01  -2.7128690e+01   2.5000000e+02  -1.0954798e+00  -4.9387419e+00  -1.7683004e+00
   1.9532325e+01  -2.7229558e+01   2.5000000e+02  -1.4215484e+00  -4.8875878e+00  -1.9932956e+00
   1.9625774e+01  -2.7327370e+01   2.5000000e+02  -1.7517966e+00  -4.8127603e+00  -2.2204768e+00
   1.9723385e+01  -2.7421987e+01   2.5000000e+02  -2.0863002e+00  -4.7135793e+00  -2.4459534e+00
   1.9825027e+01  -2.7513269e+01   2.5000000e+02  -2.4237488e+00  -4.5900642e+00  -2.6657072e+00
   1.9930563e+01  -2.7601086e+01   2.5000000e+02  -2.7615828e+00  -4.4427775e+00  -2.8761204e+00
   2.0039849e+01  -2.7685307e+01   2.5000000e+02  -3.0962327e+00  -4.2725838e+00  -3.0743914e+00
   2.0152735e+01  -2.7765810e+01   2.5000000e+02  -3.4235041e+00  -4.0803071e+00  -3.2587143e+00
   2.0269062e+01  -2.7842477e+01   2.5000000e+02  -3.7389589e+00  -3.8664184e+00  -3.4282265e+00
   2.0388669e+01  -2.7915196e+01   2.5000000e+02  -4.0382922e+00  -3.6307861e+00  -3.5827504e+00
   2.0511386e+01  -2.7983857e+01   2.5000000e+02  -4.3175914e+00  -3.3725858e+00  -3.7223498e+00
   2.0637038e+01  -2.8048361e+01   2.5000000e+02  -4.5735267e+00  -3.0903543e+00  -3.8468305e+00
   2.0765445e+01  -2.8108612e+01   2.5000000e+02  -4.8034001e+00  -2.7822265e+00  -3.9553248e+00
   2.0896422e+01  -2.8164520e+01   2.5000000e+02  -5.0051446e+00  -2.4462609e+00  -4.0459806e+00
   2.1029779e+01  -2.8216002e+01   2.5000000e+02  -5.1772933e+00  -2.0808060e+00  -4.1158245e+00
   2.1696587e+01  -2.8530550e+01   2.5000000e+02  -5.6866974e+00   6.9027502e-02  -3.5577941e+00
   2.1840388e+01  -2.8554221e+01   2.5000000e+02  -5.6704569e+00   5.7507812e-01  -3.4189692e+00
   2.1985113e+01  -2.8573223e+01   2.5000000e+02  -5.6301668e+00   1.0956876e+00  -3.2219148e+00
   2.2130560e+01  -2.8587531e+01   2.5000000e+02  -5.5695125e+00   1.6219595e+00  -2.9611731e+00
   2.2276525e+01  -2.8597124e+01   2.5000000e+02  -5.4927377e+00   2.1430707e+00  -2.6332730e+00
   2.2422804e+01  -2.8601989e+01   2.5000000e+02  -5.4044546e+00   2.6467183e+00  -2.2375478e+00
   2.2569191e+01  -2.8602118e+01   2.5000000e+02  -5.3094162e+00   3.1198878e+00  -1.7768139e+00
   2.2715481e+01  -2.8597512e+01   2.5000000e+02  -5.2122631e+00   3.5498917e+00  -1.2576726e+00
   2.2861468e+01  -2.8588178e+01   2.5000000e+02  -5.1172730e+00   3.9254975e+00  -6.9038563e-01
   2.3006949e+01  -2.8574127e+01   2.5000000e+02  -5.0281323e+00   4.2379779e+00  -8.8247179e-02
   2.3151719e+01  -2.8555381e+01   2.5000000e+02  -4.9477533e+00   4.4818554e+00   5.3342004e-01
   2.3295575e+01  -2.8531965e+01   2.5000000e+02  -4.8781679e+00   4.6552845e+00   1.1584927e+00
   2.3438319e+01  -2.8503913e+01   2.5000000e+02  -4.8204923e+00   4.7599827e+00   1.7713352e+00
   2.3579750e+01  -2.8471263e+01   2.5000000e+02  -4.7750005e+00   4.8007811e+00   2.3578517e+00
   2.3719672e+01  -2.8434062e+01   2.5000000e+02  -4.7412486e+00   4.7849060e+00   2.9063519e+00
   2.3857891e+01  -2.8392362e+01   2.5000000e+02  -4.7182782e+00   4.7211171e+00   3.4079901e+00
   2.3994218e+01  -2.8346222e+01   2.5000000e+02  -4.7048307e+00   4.6188330e+00   3.8568913e+00
   2.4128466e+01  -2.8295705e+01   2.5000000e+02  -4.6995695e+00   4.4873674e+00   4.2499336e+00
   2.4260450e+01  -2.8240882e+01   2.5000000e+02  -4.7012497e+00   4.3353347e+00   4.5863437e+00
   2.4389991e+01  -2.8181830e+01   2.5000000e+02  -4.7088407e+00   4.1702609e+00   4.8671662e+00
   2.4516915e+01  -2.8118631e+01   2.5000000e+02  -4.7215890e+00   3.9984064e+00   5.0946830e+00
   2.4641050e+01  -2.8051372e+01   2.5000000e+02  -4.7390222e+00   3.8247683e+00   5.2718759e+00
   2.4762232e+01  -2.7980147e+01   2.5000000e+02  -4.7608911e+00   3.6531901e+00   5.4020174e+00
   2.4880300e+01  -2.7905054e+01   2.5000000e+02  -4.7871068e+00   3.4865751e+00   5.4883365e+00
   2.4995099e+01  -2.7826197e+01   2.5000000e+02  -4.8176479e+00   3.3271040e+00   5.5338503e+00
   2.5106478e+01  -2.7743684e+01   2.5000000e+02  -4.8524936e+00   3.1764519e+00   5.5412846e+00
   2.5214294e+01  -2.7657628e+01   2.5000000e+02  -4.8915682e+00   3.0359404e+00   5.5131049e+00
   2.5318409e+01  -2.7568147e+01   2.5000000e+02  -4.9347318e+00   2.9066386e+00   5.4515762e+00
   2.5418691e+01  -2.7475363e+01   2.5000000e+02  -4.9817978e+00   2.7893851e+00   5.3588346e+00
   2.5515015e+01  -2.7379402e+01   2.5000000e+02  -5.0325623e+00   2.6847476e+00   5.2369285e+00
   2.5607260e+01  -2.7280395e+01   2.5000000e+02  -5.0868235e+00   2.5929577e+00   5.0878001e+00
   2.5695315e+01  -2.7178474e+01   2.5000000e+02  -5.1443564e+00   2.5138319e+00   4.9132160e+00
   2.5779072e+01  -2.7073779e+01   2.5000000e+02  -5.2048271e+00   2.4467451e+00   4.7146878e+00
   2.5858433e+01  -2.6966448e+01   2.5000000e+02  -5.2676619e+00   2.3906489e+00   4.4933890e+00
   2.5933304e+01  -2.6856627e+01   2.5000000e+02  -5.3318762e+00   2.3441574e+00   4.2501853e+00
   2.6003599e+01  -2.6744461e+01   2.5000000e+02  -5.3959422e+00   2.3056780e+00   3.9857203e+00
   2.6069240e+01  -2.6630099e+01   2.5000000e+02  -5.4577196e+00   2.2735559e+00   3.7006323e+00
   2.6130153e+01  -2.6513695e+01   2.5000000e+02  -5.5145126e+00   2.2462176e+00   3.3958061e+00
   2.6186274e+01  -2.6395400e+01   2.5000000e+02  -5.5632534e+00   2.2222661e+00   3.0725954e+00
   2.6237544e+01  -2.6275372e+01   2.5000000e+02  -5.6007806e+00   2.2005358e+00   2.7330132e+00
   2.6283911e+01  -2.6153767e+01   2.5000000e+02  -5.6241750e+00   2.1801027e+00   2.3797432e+00
   2.6325330e+01  -2.6030745e+01   2.5000000e+02  -5.6310720e+00   2.1602581e+00   2.0160639e+00
   2.6361764e+01  -2.5906467e+01   2.5000000e+02  -5.6199057e+00   2.1404712e+00   1.6456290e+00
   2.6393181e+01  -2.5781093e+01   2.5000000e+02  -5.5900454e+00   2.1203507e+00   1.2721794e+00
   2.6419557e+01  -2.5654786e+01   2.5000000e+02  -5.5418179e+00   2.0996001e+00   8.9926287e-01
   2.6440874e+01  -2.5527710e+01   2.5000000e+02  -5.4764318e+00   2.0779776e+00   5.2994842e-01
   2.6457122e+01  -2.5400027e+01   2.5000000e+02  -5.3958173e+00   2.0552420e+00   1.6658659e-01
   2.6468295e+01  -2.5271901e+01   2.5000000e+02  -5.3024039e+00   2.0310882e+00  -1.8935975e-01
   2.6474395e+01  -2.5143497e+01   2.5000000e+02  -5.1988388e+00   2.0050547e+00  -5.3742362e-01
   2.6475432e+01  -2.5014978e+01   2.5000000e+02  -5.0876545e+00   1.9764208e+00  -8.7816333e-01
   2.6471419e+01  -2.4886507e+01   2.5000000e+02  -4.9709109e+00   1.9441025e+00  -1.2130674e+00
   2.6462377e+01  -2.4758246e+01   2.5000000e+02  -4.8498511e+00   1.9065553e+00  -1.5443145e+00
   2.6448333e+01  -2.4630359e+01   2.5000000e+02  -4.7246331e+00   1.8617208e+00  -1.8743880e+00
   2.6429320e+01  -2.4503005e+01   2.5000000e+02  -4.5941931e+00   1.8070269e+00  -2.2055962e+00
   2.6405378e+01  -2.4376344e+01   2.5000000e+02  -4.4563144e+00   1.7394697e+00  -2.5395107e+00
   2.6376549e+01  -2.4250535e+01   2.5000000e+02  -4.3078974e+00   1.6557777e+00  -2.8764780e+00
   2.6342885e+01  -2.4125735e+01   2.5000000e+02  -4.1454263e+00   1.5526439e+00  -3.2152523e+00
   2.6304441e+01  -2.4002099e+01   2.5000000e+02  -3.9655456e+00   1.4270074e+00  -3.5528753e+00
   2.6261278e+01  -2.3879780e+01   2.5000000e+02  -3.7656583e+00   1.2763352e+00  -3.8848080e+00
   2.6213463e+01  -2.3758931e+01   2.5000000e+02  -3.5444235e+00   1.0988621e+00  -4.2053175e+00
   2.6161066e+01  -2.3639699e+01   2.5000000e+02  -3.3020393e+00   8.9373609e-01  -4.5080673e+00
   2.6104165e+01  -2.3522232e+01   2.5000000e+02  -3.0402942e+00   6.6107746e-01  -4.7867370e+00
   2.6042840e+01  -2.3406674e+01   2.5000000e+02  -2.7623309e+00   4.0191731e-01  -5.0356248e+00
   2.5977179e+01  -2.3293167e+01   2.5000000e+02  -2.4722438e+00   1.1807845e-01  -5.2500485e+00
   2.5907270e+01  -2.3181849e+01   2.5000000e+02  -2.1745589e+00  -1.8799529e-01  -5.4265472e+00
   2.5833210e+01  -2.3072856e+01   2.5000000e+02  -1.8737766e+00  -5.1338044e-01  -5.5628312e+00
   2.5755099e+01  -2.2966321e+01   2.5000000e+02  -1.5740073e+00  -8.5480161e-01  -5.6575939e+00
   2.5673039e+01  -2.2862374e+01   2.5000000e+02  -1.2787912e+00  -1.2087117e+00  -5.7102405e+00
   2.5587139e+01  -2.2761140e+01   2.5000000e+02  -9.9110128e-01  -1.5713336e+00  -5.7206360e+00
   2.5497509e+01  -2.2662741e+01   2.5000000e+02  -7.1346178e-01  -1.9386945e+00  -5.6889481e+00
   2.5404267e+01  -2.2567298e+01   2.5000000e+02  -4.4815667e-01  -2.3066489e+00  -5.6156064e+00
   2.5307530e+01  -2.2474924e+01   2.5000000e+02  -1.9739951e-01  -2.6709746e+00  -5.5013711e+00
   2.5207421e+01  -2.2385731e+01   2.5000000e+02   3.6501653e-02  -3.0274495e+00  -5.3474829e+00
   2.5104067e+01  -2.2299826e+01   2.5000000e+02   2.5108579e-01  -3.3720086e+00  -5.1558398e+00
   2.4997595e+01  -2.2217313e+01   2.5000000e+02   4.4376457e-01  -3.7009357e+00  -4.9291502e+00
   2.4888140e+01  -2.2138290e+01   2.5000000e+02   6.1190784e-01  -4.0110759e+00  -4.6710298e+00
   2.4775834e+01  -2.2062851e+01   2.5000000e+02   7.5301879e-01  -4.3000915e+00  -4.3859763e+00
   2.4660818e+01  -2.1991088e+01   2.5000000e+02   8.6491351e-01  -4.5666740e+00  -4.0792492e+00
   2.4543230e+01  -2.1923085e+01   2.5000000e+02   9.4594254e-01  -4.8107605e+00  -3.7565641e+00
   2.4423215e+01  -2.1858924e+01   2.5000000e+02   9.9516894e-01  -5.0336109e+00  -3.4237179e+00
   2.4300916e+01  -2.1798682e+01   2.5000000e+02   1.0125202e+00  -5.2377957e+00  -3.0860868e+00
   2.4176483e+01  -2.1742429e+01   2.5000000e+02   9.9885816e-01  -5.4269991e+00  -2.7481438e+00
   2.4050064e+01  -2.1690233e+01   2.5000000e+02   9.5598876e-01  -5.6056948e+00  -2.4130114e+00
   2.3921812e+01  -2.1642156e+01   2.5000000e+02   8.8658331e-01  -5.7786897e+00  -2.0821680e+00
   2.3791878e+01  -2.1598255e+01   2.5000000e+02   7.9404474e-01  -5.9506301e+00  -1.7553123e+00
   2.3660419e+01  -2.1558582e+01   2.5000000e+02   6.8233520e-01  -6.1255081e+00  -1.4304558e+00
   2.3527589e+01  -2.1523184e+01   2.5000000e+02   5.5578505e-01  -6.3062764e+00  -1.1041475e+00
   2.3393548e+01  -2.1492103e+01   2.5000000e+02   4.1891298e-01  -6.4945627e+00  -7.7186111e-01
   2.3258453e+01  -2.1465376e+01   2.5000000e+02   2.7625553e-01  -6.6905491e+00  -4.2840125e-01
   2.3122465e+01  -2.1443035e+01   2.5000000e+02   1.3222902e-01  -6.8929510e+00  -6.8353578e-02
   2.2985743e+01  -2.1425105e+01   2.5000000e+02  -8.9960980e-03  -7.0991090e+00   3.1352576e-01
   2.2848449e+01  -2.1411609e+01   2.5000000e+02  -1.4357540e-01  -7.3051312e+00   7.2194161e-01
   2.2710745e+01  -2.1402561e+01   2.5000000e+02  -2.6807509e-01  -7.5060764e+00   1.1607579e+00
   2.2572793e+01  -2.1397974e+01   2.5000000e+02  -3.7949862e-01  -7.6961683e+00   1.6327402e+00
   2.2434756e+01  -2.1397852e+01   2.5000000e+02  -4.7531752e-01  -7.8690152e+00   2.1393235e+00
   2.2296795e+01  -2.1402195e+01   2.5000000e+02  -5.5345123e-01  -8.0178707e+00   2.6804422e+00
   2.2159073e+01  -2.1410999e+01   2.5000000e+02  -6.1222882e-01  -8.1359141e+00   3.2543761e+00
   2.2021753e+01  -2.1424252e+01   2.5000000e+02  -6.5034870e-01  -8.2165745e+00   3.8576685e+00
   2.1884995e+01  -2.1441940e+01   2.5000000e+02  -6.6680701e-01  -8.2538984e+00   4.4851433e+00
   2.1748963e+01  -2.1464041e+01   2.5000000e+02  -6.6085091e-01  -8.2429304e+00   5.1299604e+00
   2.1613815e+01  -2.1490528e+01   2.5000000e+02  -6.3192480e-01  -8.1800999e+00   5.7838779e+00
   2.1479712e+01  -2.1521372e+01   2.5000000e+02  -5.7961721e-01  -8.0635596e+00   6.4375559e+00
   2.1346812e+01  -2.1556535e+01   2.5000000e+02  -5.0365211e-01  -7.8934217e+00   7.0810222e+00
   2.1215274e+01  -2.1595975e+01   2.5000000e+02  -4.0385657e-01  -7.6718621e+00   7.7041867e+00
   2.1085253e+01  -2.1639647e+01   2.5000000e+02  -2.8015244e-01  -7.4030390e+00   8.2974067e+00
   2.0956904e+01  -2.1687497e+01   2.5000000e+02  -1.3258278e-01  -7.0928512e+00   8.8519544e+00
   2.0830381e+01  -2.1739469e+01   2.5000000e+02   3.8684617e-02  -6.7485502e+00   9.3604195e+00
   2.0705835e+01  -2.1795501e+01   2.5000000e+02   2.3330462e-01  -6.3782559e+00   9.8169492e+00
   2.0583416e+01  -2.1855528e+01   2.5000000e+02   4.5071225e-01  -5.9904631e+00   1.0217324e+01
   2.0463272e+01  -2.1919476e+01   2.5000000e+02   6.9004205e-01  -5.5935805e+00   1.0558890e+01
   2.0345548e+01  -2.1987271e+01   2.5000000e+02   9.5010269e-01  -5.1955559e+00   1.0840392e+01
   2.0230387e+01  -2.2058831e+01   2.5000000e+02   1.2292990e+00  -4.8036192e+00   1.1061727e+01
   2.0117930e+01  -2.2134070e+01   2.5000000e+02   1.5256119e+00  -4.4241313e+00   1.1223690e+01
   2.0008315e+01  -2.2212900e+01   2.5000000e+02   1.8365888e+00  -4.0625243e+00   1.1327733e+01
   1.9901677e+01  -2.2295225e+01   2.5000000e+02   2.1593182e+00  -3.7233090e+00   1.1375765e+01
   1.9798149e+01  -2.2380947e+01   2.5000000e+02   2.4904695e+00  -3.4101252e+00   1.1370016e+01
   1.9697859e+01  -2.2469962e+01   2.5000000e+02   2.8263100e+00  -3.1257917e+00   1.1312947e+01
   1.9600935e+01  -2.2562165e+01   2.5000000e+02   3.1627820e+00  -2.8723813e+00   1.1207215e+01
   1.9507498e+01  -2.2657444e+01   2.5000000e+02   3.4955557e+00  -2.6512445e+00   1.1055678e+01
   1.9417668e+01  -2.2755684e+01   2.5000000e+02   3.8201553e+00  -2.4630676e+00   1.0861405e+01
   1.9331561e+01  -2.2856766e+01   2.5000000e+02   4.1320854e+00  -2.3078980e+00   1.0627698e+01
   1.9249288e+01  -2.2960568e+01   2.5000000e+02   4.4269849e+00  -2.1851851e+00   1.0358084e+01
   1.9170958e+01  -2.3066965e+01   2.5000000e+02   4.7007862e+00  -2.0938472e+00   1.0056286e+01
   1.9096674e+01  -2.3175827e+01   2.5000000e+02   4.9498566e+00  -2.0323373e+00   9.7261739e+00
   1.9026536e+01  -2.3287021e+01   2.5000000e+02   5.1711390e+00  -1.9987522e+00   9.3716725e+00
   1.8960640e+01  -2.3400412e+01   2.5000000e+02   5.3622491e+00  -1.9909425e+00   8.9966529e+00
   1.8899076e+01  -2.3515861e+01   2.5000000e+02   5.5215139e+00  -2.0066165e+00   8.6048225e+00
   1.8841930e+01  -2.3633227e+01   2.5000000e+02   5.6479686e+00  -2.0434467e+00   8.1996025e+00
   1.8789285e+01  -2.3752366e+01   2.5000000e+02   5.7412839e+00  -2.0991470e+00   7.7840281e+00
   1.8741217e+01  -2.3873132e+01   2.5000000e+02   5.8016289e+00  -2.1715087e+00   7.3606763e+00
   1.8697798e+01  -2.3995374e+01   2.5000000e+02   5.8294967e+00  -2.2584207e+00   6.9316530e+00
   1.8659095e+01  -2.4118942e+01   2.5000000e+02   5.8255118e+00  -2.3578726e+00   6.4986071e+00
   1.8625168e+01  -2.4243682e+01   2.5000000e+02   5.7902373e+00  -2.4679218e+00   6.0628544e+00
   1.8596073e+01  -2.4369440e+01   2.5000000e+02   5.7240443e+00  -2.5866899e+00   5.6255196e+00
   1.8571862e+01  -2.4496058e+01   2.5000000e+02   5.6270525e+00  -2.7123442e+00   5.1877475e+00
   1.8552579e+01  -2.4623378e+01   2.5000000e+02   5.4991574e+00  -2.8430901e+00   4.7508974e+00
   1.8538262e+01  -2.4751241e+01   2.5000000e+02   5.3401584e+00  -2.9771857e+00   4.3167172e+00
   1.8528946e+01  -2.4879485e+01   2.5000000e+02   5.1499606e+00  -3.1129680e+00   3.8874521e+00
   1.8524657e+01  -2.5007949e+01   2.5000000e+02   4.9287954e+00  -3.2488624e+00   3.4658631e+00
   1.8525417e+01  -2.5136470e+01   2.5000000e+02   4.6774592e+00  -3.3834188e+00   3.0551534e+00
   1.8531240e+01  -2.5264884e+01   2.5000000e+02   4.3974984e+00  -3.5153231e+00   2.6588090e+00
   1.8542136e+01  -2.5393029e+01   2.5000000e+02   4.0913279e+00  -3.6434333e+00   2.2803437e+00
   1.8558106e+01  -2.5520741e+01   2.5000000e+02   3.7622720e+00  -3.7667783e+00   1.9230371e+00
   1.8579146e+01  -2.5647854e+01   2.5000000e+02   3.4145086e+00  -3.8845859e+00   1.5896095e+00
   1.8605246e+01  -2.5774207e+01   2.5000000e+02   3.0528896e+00  -3.9962860e+00   1.2819038e+00
   1.8636388e+01  -2.5899636e+01   2.5000000e+02   2.6827066e+00  -4.1014892e+00   1.0006417e+00
   1.8672548e+01  -2.6023979e+01   2.5000000e+02   2.3093407e+00  -4.1999582e+00   7.4521714e-01
   1.8713696e+01  -2.6147074e+01   2.5000000e+02   1.9378752e+00  -4.2915430e+00   5.1362220e-01
   1.8759793e+01  -2.6268760e+01   2.5000000e+02   1.5726866e+00  -4.3760810e+00   3.0252032e-01
   1.8810796e+01  -2.6388879e+01   2.5000000e+02   1.2170693e+00  -4.4532974e+00   1.0745207e-01
   1.8866653e+01  -2.6507272e+01   2.5000000e+02   8.7297160e-01  -4.5226766e+00  -7.6778692e-02
   1.8927306e+01  -2.6623784e+01   2.5000000e+02   5.4084367e-01  -4.5833667e+00  -2.5563309e-01
   1.8992690e+01  -2.6738261e+01   2.5000000e+02   2.1967701e-01  -4.6341169e+00  -4.3429089e-01
   1.9062733e+01  -2.6850551e+01   2.5000000e+02  -9.2793784e-02  -4.6732751e+00  -6.1711692e-01
   1.9137356e+01  -2.6960505e+01   2.5000000e+02  -3.9973544e-01  -4.6988579e+00  -8.0720638e-01
   1.9216473e+01  -2.7067975e+01   2.5000000e+02  -7.0474358e-01  -4.7086979e+00  -1.0060756e+00
   1.9299993e+01  -2.7172819e+01   2.5000000e+02  -1.0113360e+00  -4.7006439e+00  -1.2135463e+00
   1.9387815e+01  -2.7274895e+01   2.5000000e+02  -1.3224301e+00  -4.6727938e+00  -1.4278271e+00
   1.9479834e+01  -2.7374065e+01   2.5000000e+02  -1.6399328e+00  -4.6237185e+00  -1.6458318e+00
   1.9575937e+01  -2.7470196e+01   2.5000000e+02  -1.9644456e+00  -4.5526142e+00  -1.8636312e+00
   1.9676006e+01  -2.7563157e+01   2.5000000e+02  -2.2951394e+00  -4.4593679e+00  -2.0770328e+00
   1.9779915e+01  -2.7652821e+01   2.5000000e+02  -2.6298098e+00  -4.3444809e+00  -2.2821421e+00
   1.9887532e+01  -2.7739068e+01   2.5000000e+02  -2.9651058e+00  -4.2088660e+00  -2.4758487e+00
   1.9998720e+01  -2.7821778e+01   2.5000000e+02  -3.2968586e+00  -4.0535601e+00  -2.6561481e+00
   2.0113335e+01  -2.7900838e+01   2.5000000e+02  -3.6204929e+00  -3.8793704e+00  -2.8221967e+00
   2.0231228e+01  -2.7976139e+01   2.5000000e+02  -3.9314168e+00  -3.6865697e+00  -2.9741500e+00
   2.0352244e+01  -2.8047578e+01   2.5000000e+02  -4.2253458e+00  -3.4746871e+00  -3.1127761e+00
   2.0476222e+01  -2.8115056e+01   2.5000000e+02  -4.4985126e+00  -3.2424598e+00  -3.2389600e+00
   2.0602998e+01  -2.8178480e+01   2.5000000e+02  -4.7477689e+00  -2.9879428e+00  -3.3531898e+00
   2.0732401e+01  -2.8237761e+01   2.5000000e+02  -4.9705757e+00  -2.7087749e+00  -3.4551196e+00
   2.0864256e+01  -2.8292817e+01   2.5000000e+02  -5.1649559e+00  -2.4025156e+00  -3.5432873e+00
   2.0998384e+01  -2.8343571e+01   2.5000000e+02  -5.3294293e+00  -2.0670072e+00  -3.6150095e+00
   2.1134602e+01  -2.8389953e+01   2.5000000e+02  -5.4629876e+00  -1.7006954e+00  -3.6664070e+00
   2.1272723e+01  -2.8431898e+01   2.5000000e+02  -5.5651138e+00  -1.3028910e+00  -3.6925382e+00
   2.1412557e+01  -2.8469346e+01   2.5000000e+02  -5.6358520e+00  -8.7397982e-01  -3.6875728e+00
   2.1553910e+01  -2.8502246e+01   2.5000000e+02  -5.6759021e+00  -4.1562355e-01  -3.6449776e+00
   2.2269128e+01  -2.8725255e+01   2.5000000e+02  -5.5118715e+00   2.0233025e+00  -2.2595154e+00
   2.2415792e+01  -2.8730185e+01   2.5000000e+02  -5.3980150e+00   2.5209338e+00  -1.8872337e+00
   2.2562566e+01  -2.8730523e+01   2.5000000e+02  -5.2749470e+00   2.9912162e+00  -1.4479042e+00
   2.2709259e+01  -2.8726270e+01   2.5000000e+02  -5.1476701e+00   3.4209526e+00  -9.4709253e-01
   2.2855675e+01  -2.8717431e+01   2.5000000e+02  -5.0210229e+00   3.7981998e+00  -3.9422665e-01
   2.3001624e+01  -2.8704018e+01   2.5000000e+02  -4.8994001e+00   4.1133890e+00   1.9799624e-01
   2.3146912e+01  -2.8686049e+01   2.5000000e+02  -4.7865202e+00   4.3601363e+00   8.1452816e-01
   2.3291350e+01  -2.8663546e+01   2.5000000e+02  -4.6852387e+00   4.5357124e+00   1.4392181e+00
   2.3434748e+01  -2.8636541e+01   2.5000000e+02  -4.5974495e+00   4.6410456e+00   2.0560746e+00
   2.3576918e+01  -2.8605068e+01   2.5000000e+02  -4.5240941e+00   4.6803612e+00   2.6504150e+00
   2.3717676e+01  -2.8569169e+01   2.5000000e+02  -4.4652487e+00   4.6605049e+00   3.2097805e+00
   2.3856838e+01  -2.8528892e+01   2.5000000e+02  -4.4203022e+00   4.5901067e+00   3.7244695e+00
   2.3994225e+01  -2.8484289e+01   2.5000000e+02  -4.3881760e+00   4.4787040e+00   4.1877605e+00
   2.4129659e+01  -2.8435419e+01   2.5000000e+02  -4.3675509e+00   4.3359376e+00   4.5957907e+00
   2.4262966e+01  -2.8382346e+01   2.5000000e+02  -4.3570753e+00   4.1709004e+00   4.9472114e+00
   2.4393977e+01  -2.8325140e+01   2.5000000e+02  -4.3555191e+00   3.9916810e+00   5.2426861e+00
   2.4522525e+01  -2.8263874e+01   2.5000000e+02  -4.3618811e+00   3.8051254e+00   5.4843051e+00
   2.4648447e+01  -2.8198630e+01   2.5000000e+02  -4.3754062e+00   3.6167654e+00   5.6750565e+00
   2.4771586e+01  -2.8129492e+01   2.5000000e+02  -4.3955808e+00   3.4309058e+00   5.8183393e+00
   2.4891788e+01  -2.8056549e+01   2.5000000e+02  -4.4220727e+00   3.2508057e+00   5.9175979e+00
   2.5008905e+01  -2.7979897e+01   2.5000000e+02  -4.4546457e+00   3.0788947e+00   5.9760942e+00
   2.5122793e+01  -2.7899633e+01   2.5000000e+02  -4.4931008e+00   2.9170147e+00   5.9967703e+00
   2.5233313e+01  -2.7815863e+01   2.5000000e+02  -4.5371968e+00   2.7666018e+00   5.9822562e+00
   2.5340333e+01  -2.7728693e+01   2.5000000e+02  -4.5866419e+00   2.6288296e+00   5.9349083e+00
   2.5443724e+01  -2.7638234e+01   2.5000000e+02  -4.6410967e+00   2.5046735e+00   5.8569067e+00
   2.5543365e+01  -2.7544604e+01   2.5000000e+02  -4.7002052e+00   2.3948838e+00   5.7503485e+00
   2.5639139e+01  -2.7447920e+01   2.5000000e+02  -4.7636664e+00   2.2999368e+00   5.6172504e+00
   2.5730936e+01  -2.7348306e+01   2.5000000e+02  -4.8312438e+00   2.2199221e+00   5.4595364e+00
   2.5818651e+01  -2.7245887e+01   2.5000000e+02  -4.9027570e+00   2.1544721e+00   5.2789207e+00
   2.5902185e+01  -2.7140794e+01   2.5000000e+02  -4.9779777e+00   2.1027161e+00   5.0768011e+00
   2.5981446e+01  -2.7033159e+01   2.5000000e+02  -5.0564767e+00   2.0633151e+00   4.8541545e+00
   2.6056348e+01  -2.6923116e+01   2.5000000e+02  -5.1374261e+00   2.0345600e+00   4.6115291e+00
   2.6126811e+01  -2.6810803e+01   2.5000000e+02  -5.2194173e+00   2.0145176e+00   4.3491579e+00
   2.6192761e+01  -2.6696360e+01   2.5000000e+02  -5.3003620e+00   2.0011986e+00   4.0671702e+00
   2.6254129e+01  -2.6579929e+01   2.5000000e+02  -5.3775143e+00   1.9927119e+00   3.7658788e+00
   2.6310856e+01  -2.6461654e+01   2.5000000e+02  -5.4476306e+00   1.9873684e+00   3.4460746e+00
   2.6362886e+01  -2.6341682e+01   2.5000000e+02  -5.5072566e+00   1.9837532e+00   3.1092393e+00
   2.6410170e+01  -2.6220159e+01   2.5000000e+02  -5.5530781e+00   1.9807355e+00   2.7576279e+00
   2.6452665e+01  -2.6097235e+01   2.5000000e+02  -5.5822662e+00   1.9774473e+00   2.3942283e+00
   2.6490336e+01  -2.5973060e+01   2.5000000e+02  -5.5927646e+00   1.9732483e+00   2.0225684e+00
   2.6523153e+01  -2.5847785e+01   2.5000000e+02  -5.5834702e+00   1.9676915e+00   1.6464485e+00
   2.6551090e+01  -2.5721561e+01   2.5000000e+02  -5.5542961e+00   1.9604887e+00   1.2696400e+00
   2.6574131e+01  -2.5594542e+01   2.5000000e+02  -5.5061312e+00   1.9514686e+00   8.9561610e-01
   2.6592264e+01  -2.5466880e+01   2.5000000e+02  -5.4407180e+00   1.9405415e+00   5.2727811e-01
   2.6605482e+01  -2.5338729e+01   2.5000000e+02  -5.3604671e+00   1.9276369e+00   1.6676245e-01
   2.6613785e+01  -2.5210243e+01   2.5000000e+02  -5.2682142e+00   1.9126210e+00  -1.8472238e-01
   2.6617180e+01  -2.5081574e+01   2.5000000e+02  -5.1669233e+00   1.8951933e+00  -5.2699939e-01
   2.6615678e+01  -2.4952875e+01   2.5000000e+02  -5.0593446e+00   1.8747726e+00  -8.6092937e-01
   2.6609296e+01  -2.4824299e+01   2.5000000e+02  -4.9476485e+00   1.8503785e+00  -1.1883030e+00
   2.6598056e+01  -2.4695999e+01   2.5000000e+02  -4.8330836e+00   1.8205364e+00  -1.5115882e+00
   2.6581987e+01  -2.4568124e+01   2.5000000e+02  -4.7157196e+00   1.7832221e+00  -1.8335390e+00
   2.6561123e+01  -2.4440827e+01   2.5000000e+02  -4.5943520e+00   1.7358800e+00  -2.1566717e+00
   2.6535501e+01  -2.4314254e+01   2.5000000e+02  -4.4665884e+00   1.6755150e+00  -2.4827493e+00
   2.6505167e+01  -2.4188555e+01   2.5000000e+02  -4.3291673e+00   1.5988777e+00  -2.8122599e+00
   2.6470168e+01  -2.4063876e+01   2.5000000e+02  -4.1784335e+00   1.5027144e+00  -3.1441114e+00
   2.6430559e+01  -2.3940361e+01   2.5000000e+02  -4.0109341e+00   1.3840560e+00  -3.4755112e+00
   2.6386398e+01  -2.3818154e+01   2.5000000e+02  -3.8240095e+00   1.2405010e+00  -3.8021295e+00
   2.6337749e+01  -2.3697395e+01   2.5000000e+02  -3.6162683e+00   1.0704353e+00  -4.1185075e+00
   2.6284679e+01  -2.3578225e+01   2.5000000e+02  -3.3878581e+00   8.7316597e-01  -4.4186261e+00
   2.6227262e+01  -2.3460779e+01   2.5000000e+02  -3.1404670e+00   6.4893314e-01  -4.6965388e+00
   2.6165574e+01  -2.3345193e+01   2.5000000e+02  -2.8770787e+00   3.9883633e-01  -4.9469161e+00
   2.6099696e+01  -2.3231599e+01   2.5000000e+02  -2.6015388e+00   1.2468233e-01  -5.1654197e+00
   2.6029713e+01  -2.3120126e+01   2.5000000e+02  -2.3180509e+00  -1.7118206e-01  -5.3488387e+00
   2.5955714e+01  -2.3010902e+01   2.5000000e+02  -2.0307185e+00  -4.8601359e-01  -5.4950070e+00
   2.5877794e+01  -2.2904050e+01   2.5000000e+02  -1.7432217e+00  -8.1677867e-01  -5.6025753e+00
   2.5796047e+01  -2.2799692e+01   2.5000000e+02  -1.4586678e+00  -1.1602040e+00  -5.6707303e+00
   2.5710576e+01  -2.2697946e+01   2.5000000e+02  -1.1796411e+00  -1.5127811e+00  -5.6989504e+00
   2.5621484e+01  -2.2598927e+01   2.5000000e+02  -9.0834463e-01  -1.8707748e+00  -5.6868780e+00
   2.5528878e+01  -2.2502747e+01   2.5000000e+02  -6.4682281e-01  -2.2302297e+00  -5.6343162e+00
   2.5432870e+01  -2.2409513e+01   2.5000000e+02  -3.9716478e-01  -2.5870153e+00  -5.5413448e+00
   2.5333573e+01  -2.2319331e+01   2.5000000e+02  -1.6164369e-01  -2.9369106e+00  -5.4085128e+00
   2.5231104e+01  -2.2232302e+01   2.5000000e+02   5.7219742e-02  -3.2757396e+00  -5.2370554e+00
   2.5125583e+01  -2.2148524e+01   2.5000000e+02   2.5668356e-01  -3.5995436e+00  -5.0290909e+00
   2.5017132e+01  -2.2068090e+01   2.5000000e+02   4.3388785e-01  -3.9048011e+00  -4.7877505e+00
   2.4905878e+01  -2.1991089e+01   2.5000000e+02   5.8600813e-01  -4.1886647e+00  -4.5172205e+00
   2.4791947e+01  -2.1917609e+01   2.5000000e+02   7.1045980e-01  -4.4492219e+00  -4.2226518e+00
   2.4675470e+01  -2.1847731e+01   2.5000000e+02   8.0509998e-01  -4.6857318e+00  -3.9099407e+00
   2.4556580e+01  -2.1781533e+01   2.5000000e+02   8.6843288e-01  -4.8987995e+00  -3.5853698e+00
   2.4435411e+01  -2.1719088e+01   2.5000000e+02   8.9977670e-01  -5.0904496e+00  -3.2551344e+00
   2.4312100e+01  -2.1660467e+01   2.5000000e+02   8.9937458e-01  -5.2640451e+00  -2.9248185e+00
   2.4186786e+01  -2.1605733e+01   2.5000000e+02   8.6842986e-01  -5.4240515e+00  -2.5988640e+00
   2.4059608e+01  -2.1554947e+01   2.5000000e+02   8.0907037e-01  -5.5756465e+00  -2.2801435e+00
   2.3930710e+01  -2.1508167e+01   2.5000000e+02   7.2423924e-01  -5.7242227e+00  -1.9696946e+00
   2.3800234e+01  -2.1465444e+01   2.5000000e+02   6.1752845e-01  -5.8748654e+00  -1.6666262e+00
   2.3668325e+01  -2.1426825e+01   2.5000000e+02   4.9299299e-01  -6.0318565e+00  -1.3682577e+00
   2.3535131e+01  -2.1392352e+01   2.5000000e+02   3.5495861e-01  -6.1982846e+00  -1.0704117e+00
   2.3400797e+01  -2.1362065e+01   2.5000000e+02   2.0784527e-01  -6.3758021e+00  -7.6780718e-01
   2.3265473e+01  -2.1335996e+01   2.5000000e+02   5.6011010e-02  -6.5644969e+00  -4.5452937e-01
   2.3129308e+01  -2.1314174e+01   2.5000000e+02  -9.6368546e-02  -6.7629136e+00  -1.2447209e-01
   2.2992451e+01  -2.1296624e+01   2.5000000e+02  -2.4539817e-01  -6.9681523e+00   2.2824316e-01
   2.2855053e+01  -2.1283364e+01   2.5000000e+02  -3.8753935e-01  -7.1760234e+00   6.0889130e-01
   2.2717265e+01  -2.1274410e+01   2.5000000e+02  -5.1965215e-01  -7.3812526e+00   1.0218337e+00
   2.2579239e+01  -2.1269771e+01   2.5000000e+02  -6.3902880e-01  -7.5776983e+00   1.4702422e+00
   2.2441126e+01  -2.1269452e+01   2.5000000e+02  -7.4339098e-01  -7.7586003e+00   1.9558831e+00
   2.2303077e+01  -2.1273454e+01   2.5000000e+02  -8.3086712e-01  -7.9168449e+00   2.4789354e+00
   2.2165245e+01  -2.1281773e+01   2.5000000e+02  -8.9995339e-01  -8.0452570e+00   3.0378512e+00
   2.2027780e+01  -2.1294398e+01   2.5000000e+02  -9.4947082e-01  -8.1369322e+00   3.6293030e+00
   2.1890834e+01  -2.1311317e+01   2.5000000e+02  -9.7849562e-01  -8.1855951e+00   4.2481814e+00
   2.1754557e+01  -2.1332510e+01   2.5000000e+02  -9.8632704e-01  -8.1859788e+00   4.8877046e+00
   2.1619100e+01  -2.1357955e+01   2.5000000e+02  -9.7243089e-01  -8.1342044e+00   5.5396337e+00
   2.1484611e+01  -2.1387622e+01   2.5000000e+02  -9.3642186e-01  -8.0281125e+00   6.1946201e+00
   2.1351239e+01  -2.1421479e+01   2.5000000e+02  -8.7802162e-01  -7.8675122e+00   6.8426475e+00
   2.1219132e+01  -2.1459490e+01   2.5000000e+02  -7.9704321e-01  -7.6542877e+00   7.4735654e+00
   2.1088435e+01  -2.1501611e+01   2.5000000e+02  -6.9338740e-01  -7.3923314e+00   8.0776405e+00
   2.0959295e+01  -2.1547796e+01   2.5000000e+02  -5.6702065e-01  -7.0873188e+00   8.6460542e+00
   2.0831855e+01  -2.1597994e+01   2.5000000e+02  -4.1799196e-01  -6.7463102e+00   9.1713243e+00
   2.0706257e+01  -2.1652149e+01   2.5000000e+02  -2.4645877e-01  -6.3772744e+00   9.6475452e+00
   2.0582642e+01  -2.1710202e+01   2.5000000e+02  -5.2725349e-02  -5.9885794e+00   1.0070480e+01
   2.0461148e+01  -2.1772087e+01   2.5000000e+02   1.6268580e-01  -5.5885136e+00   1.0437494e+01
   2.0341913e+01  -2.1837736e+01   2.5000000e+02   3.9898567e-01  -5.1849125e+00   1.0747375e+01
   2.0225072e+01  -2.1907076e+01   2.5000000e+02   6.5504998e-01  -4.7848811e+00   1.1000085e+01
   2.0110758e+01  -2.1980030e+01   2.5000000e+02   9.2937707e-01  -4.3946480e+00   1.1196483e+01
   1.9999101e+01  -2.2056517e+01   2.5000000e+02   1.2200621e+00  -4.0195130e+00   1.1338069e+01
   1.9890229e+01  -2.2136450e+01   2.5000000e+02   1.5247832e+00  -3.6638745e+00   1.1426761e+01
   1.9784268e+01  -2.2219741e+01   2.5000000e+02   1.8408322e+00  -3.3312950e+00   1.1464727e+01
   1.9681341e+01  -2.2306297e+01   2.5000000e+02   2.1651250e+00  -3.0245794e+00   1.1454274e+01
   1.9581569e+01  -2.2396020e+01   2.5000000e+02   2.4942393e+00  -2.7458544e+00   1.1397791e+01
   1.9485068e+01  -2.2488810e+01   2.5000000e+02   2.8244765e+00  -2.4966244e+00   1.1297723e+01
   1.9391954e+01  -2.2584563e+01   2.5000000e+02   3.1519209e+00  -2.2778325e+00   1.1156587e+01
   1.9302337e+01  -2.2683170e+01   2.5000000e+02   3.4725180e+00  -2.0898761e+00   1.0977002e+01
   1.9216325e+01  -2.2784521e+01   2.5000000e+02   3.7821933e+00  -1.9326501e+00   1.0761711e+01
   1.9134023e+01  -2.2888502e+01   2.5000000e+02   4.0769571e+00  -1.8055773e+00   1.0513600e+01
   1.9055532e+01  -2.2994993e+01   2.5000000e+02   4.3530227e+00  -1.7076518e+00   1.0235709e+01
   1.8980949e+01  -2.3103875e+01   2.5000000e+02   4.6069560e+00  -1.6375128e+00   9.9311932e+00
   1.8910369e+01  -2.3215024e+01   2.5000000e+02   4.8357729e+00  -1.5935276e+00   9.6032914e+00
   1.8843880e+01  -2.3328314e+01   2.5000000e+02   5.0370396e+00  -1.5738744e+00   9.2552606e+00
   1.8781568e+01  -2.3443614e+01   2.5000000e+02   5.2089370e+00  -1.5766415e+00   8.8903072e+00
   1.8723516e+01  -2.3560794e+01   2.5000000e+02   5.3502968e+00  -1.5999096e+00   8.5114781e+00
   1.8669801e+01  -2.3679719e+01   2.5000000e+02   5.4605558e+00  -1.6417893e+00   8.1215867e+00
   1.8620496e+01  -2.3800252e+01   2.5000000e+02   5.5396794e+00  -1.7004574e+00   7.7231178e+00
   1.8575669e+01  -2.3922254e+01   2.5000000e+02   5.5880215e+00  -1.7741575e+00   7.3181689e+00
   1.8535385e+01  -2.4045585e+01   2.5000000e+02   5.6061508e+00  -1.8611947e+00   6.9084284e+00
   1.8499702e+01  -2.4170102e+01   2.5000000e+02   5.5946538e+00  -1.9599004e+00   6.4952301e+00
   1.8468677e+01  -2.4295659e+01   2.5000000e+02   5.5539802e+00  -2.0686342e+00   6.0796537e+00
   1.8442357e+01  -2.4422112e+01   2.5000000e+02   5.4843202e+00  -2.1857572e+00   5.6626803e+00
   1.8420789e+01  -2.4549313e+01   2.5000000e+02   5.3855936e+00  -2.3096574e+00   5.2453965e+00
   1.8404011e+01  -2.4677111e+01   2.5000000e+02   5.2575103e+00  -2.4387373e+00   4.8291948e+00
   1.8392057e+01  -2.4805359e+01   2.5000000e+02   5.0997279e+00  -2.5714575e+00   4.4158953e+00
   1.8384957e+01  -2.4933903e+01   2.5000000e+02   4.9120790e+00  -2.7063396e+00   4.0078626e+00
   1.8382734e+01  -2.5062593e+01   2.5000000e+02   4.6947953e+00  -2.8419844e+00   3.6079620e+00
   1.8385406e+01  -2.5191276e+01   2.5000000e+02   4.4487409e+00  -2.9770805e+00   3.2194729e+00
   1.8392985e+01  -2.5319800e+01   2.5000000e+02   4.1755759e+00  -3.1104150e+00   2.8458874e+00
   1.8405478e+01  -2.5448010e+01   2.5000000e+02   3.8778606e+00  -3.2408856e+00   2.4906651e+00
   1.8422886e+01  -2.5575753e+01   2.5000000e+02   3.5590494e+00  -3.3675188e+00   2.1569273e+00
   1.8445204e+01  -2.5702876e+01   2.5000000e+02   3.2234045e+00  -3.4894872e+00   1.8471592e+00
   1.8472420e+01  -2.5829227e+01   2.5000000e+02   2.8758077e+00  -3.6061232e+00   1.5629230e+00
   1.8504519e+01  -2.5954652e+01   2.5000000e+02   2.5214953e+00  -3.7169354e+00   1.3046141e+00
   1.8541475e+01  -2.6078999e+01   2.5000000e+02   2.1656993e+00  -3.8215694e+00   1.0713198e+00
   1.8583262e+01  -2.6202117e+01   2.5000000e+02   1.8132595e+00  -3.9197965e+00   8.6075249e-01
   1.8629842e+01  -2.6323855e+01   2.5000000e+02   1.4682341e+00  -4.0114061e+00   6.6938038e-01
   1.8681175e+01  -2.6444066e+01   2.5000000e+02   1.1335418e+00  -4.0961385e+00   4.9263997e-01
   1.8737212e+01  -2.6562600e+01   2.5000000e+02   8.1073297e-01  -4.1735613e+00   3.2533088e-01
   1.8797900e+01  -2.6679312e+01   2.5000000e+02   4.9985657e-01  -4.2429821e+00   1.6206835e-01
   1.8863178e+01  -2.6794057e+01   2.5000000e+02   1.9952638e-01  -4.3033694e+00  -2.1892909e-03
   1.8932980e+01  -2.6906693e+01   2.5000000e+02  -9.2872909e-02  -4.3533369e+00  -1.7164954e-01
   1.9007232e+01  -2.7017079e+01   2.5000000e+02  -3.8082129e-01  -4.3911792e+00  -3.4925470e-01
   1.9085856e+01  -2.7125079e+01   2.5000000e+02  -6.6821526e-01  -4.4149858e+00  -5.3640232e-01
   1.9168766e+01  -2.7230555e+01   2.5000000e+02  -9.5884287e-01  -4.4228111e+00  -7.3282081e-01
   1.9255870e+01  -2.7333376e+01   2.5000000e+02  -1.2559067e+00  -4.4128787e+00  -9.3665103e-01
   1.9347071e+01  -2.7433411e+01   2.5000000e+02  -1.5615882e+00  -4.3838050e+00  -1.1447283e+00
   1.9442266e+01  -2.7530535e+01   2.5000000e+02  -1.8767550e+00  -4.3347655e+00  -1.3530144e+00
   1.9541343e+01  -2.7624624e+01   2.5000000e+02  -2.2008046e+00  -4.2655939e+00  -1.5571419e+00
   1.9644189e+01  -2.7715557e+01   2.5000000e+02  -2.5317102e+00  -4.1767677e+00  -1.7530193e+00
   1.9750682e+01  -2.7803219e+01   2.5000000e+02  -2.8662103e+00  -4.0692469e+00  -1.9373243e+00
   1.9860694e+01  -2.7887498e+01   2.5000000e+02  -3.2001346e+00  -3.9442225e+00  -2.1078909e+00
   1.9974094e+01  -2.7968285e+01   2.5000000e+02  -3.5288097e+00  -3.8027849e+00  -2.2638781e+00
   2.0090744e+01  -2.8045476e+01   2.5000000e+02  -3.8474659e+00  -3.6455814e+00  -2.4056674e+00
   2.0210501e+01  -2.8118972e+01   2.5000000e+02  -4.1515914e+00  -3.4725463e+00  -2.5345525e+00
   2.0333216e+01  -2.8188677e+01   2.5000000e+02  -4.4371726e+00  -3.2827618e+00  -2.6522630e+00
   2.0458737e+01  -2.8254501e+01   2.5000000e+02  -4.7008228e+00  -3.0744702e+00  -2.7604188e+00
   2.0586908e+01  -2.8316358e+01   2.5000000e+02  -4.9397796e+00  -2.8452522e+00  -2.8600237e+00
   2.0717566e+01  -2.8374168e+01   2.5000000e+02  -5.1518311e+00  -2.5923207e+00  -2.9510644e+00
   2.0850545e+01  -2.8427855e+01   2.5000000e+02  -5.3352171e+00  -2.3128653e+00  -3.0323040e+00
   2.0985676e+01  -2.8477349e+01   2.5000000e+02  -5.4885513e+00  -2.0043849e+00  -3.1012100e+00
   2.1122786e+01  -2.8522585e+01   2.5000000e+02  -5.6107914e+00  -1.6649742e+00  -3.1540077e+00
   2.1261698e+01  -2.8563504e+01   2.5000000e+02  -5.7012760e+00  -1.2935490e+00  -3.1857930e+00
   2.1402232e+01  -2.8600051e+01   2.5000000e+02  -5.7598082e+00  -8.9003831e-01  -3.1906792e+00
   2.1544205e+01  -2.8632180e+01   2.5000000e+02  -5.7867706e+00  -4.5558799e-01  -3.1619350e+00
   2.1687434e+01  -2.8659846e+01   2.5000000e+02  -5.7832224e+00   7.1990366e-03  -3.0922307e+00
   2.1831730e+01  -2.8683015e+01   2.5000000e+02  -5.7509843e+00   4.9395352e-01  -2.9739362e+00
   2.1976905e+01  -2.8701654e+01   2.5000000e+02  -5.6926585e+00   9.9828937e-01  -2.7996844e+00
   2.2122768e+01  -2.8715741e+01   2.5000000e+02  -5.6116091e+00   1.5116299e+00  -2.5630609e+00
   2.2871159e+01  -2.8845191e+01   2.5000000e+02  -4.9084488e+00   3.6897697e+00  -2.1513877e-02
   2.3016710e+01  -2.8831814e+01   2.5000000e+02  -4.7567585e+00   3.9964132e+00   5.5545040e-01
   2.3161629e+01  -2.8814061e+01   2.5000000e+02  -4.6137203e+00   4.2356097e+00   1.1589520e+00
   2.3305737e+01  -2.8791954e+01   2.5000000e+02  -4.4828432e+00   4.4042530e+00   1.7732024e+00
   2.3448861e+01  -2.8765519e+01   2.5000000e+02  -4.3666588e+00   4.5028595e+00   2.3824269e+00
   2.3590824e+01  -2.8734790e+01   2.5000000e+02  -4.2666798e+00   4.5352295e+00   2.9719593e+00
   2.3731456e+01  -2.8699805e+01   2.5000000e+02  -4.1834517e+00   4.5078430e+00   3.5291831e+00
   2.3870586e+01  -2.8660605e+01   2.5000000e+02  -4.1167148e+00   4.4290694e+00   4.0440844e+00
   2.4008046e+01  -2.8617239e+01   2.5000000e+02  -4.0656000e+00   4.3083176e+00   4.5095394e+00
   2.4143671e+01  -2.8569760e+01   2.5000000e+02  -4.0288702e+00   4.1552448e+00   4.9212626e+00
   2.4277300e+01  -2.8518226e+01   2.5000000e+02  -4.0051393e+00   3.9790881e+00   5.2775204e+00
   2.4408774e+01  -2.8462700e+01   2.5000000e+02  -3.9930541e+00   3.7881821e+00   5.5786667e+00
   2.4537936e+01  -2.8403249e+01   2.5000000e+02  -3.9914196e+00   3.5896706e+00   5.8266038e+00
   2.4664636e+01  -2.8339946e+01   2.5000000e+02  -3.9992490e+00   3.3893873e+00   6.0242553e+00
   2.4788725e+01  -2.8272867e+01   2.5000000e+02  -4.0157846e+00   3.1919171e+00   6.1750550e+00
   2.4910059e+01  -2.8202094e+01   2.5000000e+02  -4.0404502e+00   3.0007365e+00   6.2825707e+00
   2.5028498e+01  -2.8127711e+01   2.5000000e+02  -4.0728015e+00   2.8184360e+00   6.3502145e+00
   2.5143907e+01  -2.8049808e+01   2.5000000e+02  -4.1124463e+00   2.6469451e+00   6.3810923e+00
   2.5256155e+01  -2.7968479e+01   2.5000000e+02  -4.1589899e+00   2.4877535e+00   6.3779464e+00
   2.5365115e+01  -2.7883822e+01   2.5000000e+02  -4.2119974e+00   2.3420794e+00   6.3431917e+00
   2.5470667e+01  -2.7795936e+01   2.5000000e+02  -4.2709935e+00   2.2109667e+00   6.2790043e+00
   2.5572694e+01  -2.7704927e+01   2.5000000e+02  -4.3354866e+00   2.0953090e+00   6.1874350e+00
   2.5671085e+01  -2.7610903e+01   2.5000000e+02  -4.4050369e+00   1.9958009e+00   6.0704807e+00
   2.5765733e+01  -2.7513975e+01   2.5000000e+02  -4.4793198e+00   1.9128413e+00   5.9300974e+00
   2.5856538e+01  -2.7414257e+01   2.5000000e+02  -4.5581560e+00   1.8464119e+00   5.7681401e+00
   2.5943405e+01  -2.7311868e+01   2.5000000e+02  -4.6414838e+00   1.7959866e+00   5.5862376e+00
   2.6026242e+01  -2.7206926e+01   2.5000000e+02  -4.7292663e+00   1.7605078e+00   5.3856243e+00
   2.6104966e+01  -2.7099554e+01   2.5000000e+02  -4.8212908e+00   1.7384030e+00   5.1670452e+00
   2.6179498e+01  -2.6989879e+01   2.5000000e+02  -4.9169535e+00   1.7277069e+00   4.9307238e+00
   2.6249764e+01  -2.6878026e+01   2.5000000e+02  -5.0150557e+00   1.7262278e+00   4.6764476e+00
   2.6315695e+01  -2.6764125e+01   2.5000000e+02  -5.1136536e+00   1.7317169e+00   4.4038116e+00
   2.6377231e+01  -2.6648309e+01   2.5000000e+02  -5.2100471e+00   1.7420289e+00   4.1125277e+00
   2.6434314e+01  -2.6530709e+01   2.5000000e+02  -5.3009274e+00   1.7552594e+00   3.8027274e+00
   2.6486893e+01  -2.6411461e+01   2.5000000e+02  -5.3826328e+00   1.7697974e+00   3.4752534e+00
   2.6534923e+01  -2.6290702e+01   2.5000000e+02  -5.4515078e+00   1.7843490e+00   3.1317903e+00
   2.6578363e+01  -2.6168567e+01   2.5000000e+02  -5.5042756e+00   1.7979239e+00   2.7748477e+00
   2.6617180e+01  -2.6045196e+01   2.5000000e+02  -5.5383494e+00   1.8097915e+00   2.4076455e+00
   2.6651344e+01  -2.5920729e+01   2.5000000e+02  -5.5520624e+00   1.8194521e+00   2.0338532e+00
   2.6680833e+01  -2.5795305e+01   2.5000000e+02  -5.5447729e+00   1.8265977e+00   1.6573094e+00
   2.6705628e+01  -2.5669065e+01   2.5000000e+02  -5.5168681e+00   1.8310837e+00   1.2817434e+00
   2.6725717e+01  -2.5542152e+01   2.5000000e+02  -5.4696832e+00   1.8328892e+00   9.1052484e-01
   2.6741092e+01  -2.5414705e+01   2.5000000e+02  -5.4053586e+00   1.8320706e+00   5.4642161e-01
   2.6751752e+01  -2.5286867e+01   2.5000000e+02  -5.3266506e+00   1.8286899e+00   1.9144089e-01
   2.6757700e+01  -2.5158780e+01   2.5000000e+02  -5.2366887e+00   1.8227285e+00  -1.5334298e-01
   2.6758944e+01  -2.5030584e+01   2.5000000e+02  -5.1386783e+00   1.8139794e+00  -4.8789005e-01
   2.6755498e+01  -2.4902422e+01   2.5000000e+02  -5.0355612e+00   1.8019309e+00  -8.1319713e-01
   2.6747379e+01  -2.4774434e+01   2.5000000e+02  -4.9296470e+00   1.7856564e+00  -1.1312138e+00
   2.6734612e+01  -2.4646759e+01   2.5000000e+02  -4.8222791e+00   1.7637236e+00  -1.4445818e+00
   2.6717224e+01  -2.4519538e+01   2.5000000e+02  -4.7135907e+00   1.7341551e+00  -1.7562457e+00
   2.6695248e+01  -2.4392908e+01   2.5000000e+02  -4.6024058e+00   1.6944492e+00  -2.0689653e+00
   2.6668722e+01  -2.4267007e+01   2.5000000e+02  -4.4863411e+00   1.6416876e+00  -2.3847729e+00
   2.6637687e+01  -2.4141970e+01   2.5000000e+02  -4.3621039e+00   1.5727214e+00  -2.7045049e+00
   2.6602190e+01  -2.4017934e+01   2.5000000e+02  -4.2259720e+00   1.4844269e+00  -3.0274511e+00
   2.6562281e+01  -2.3895031e+01   2.5000000e+02  -4.0743657e+00   1.3739861e+00  -3.3512587e+00
   2.6518015e+01  -2.3773393e+01   2.5000000e+02  -3.9044359e+00   1.2391581e+00  -3.6720578e+00
   2.6469452e+01  -2.3653150e+01   2.5000000e+02  -3.7145395e+00   1.0784831e+00  -3.9848441e+00
   2.6416655e+01  -2.3534430e+01   2.5000000e+02  -3.5045115e+00   8.9139009e-01  -4.2840287e+00
   2.6359690e+01  -2.3417361e+01   2.5000000e+02  -3.2756853e+00   6.7819558e-01  -4.5640357e+00
   2.6298630e+01  -2.3302065e+01   2.5000000e+02  -3.0306592e+00   4.3999846e-01  -4.8198354e+00
   2.6233547e+01  -2.3188666e+01   2.5000000e+02  -2.7728806e+00   1.7852578e-01  -5.0472972e+00
   2.6164521e+01  -2.3077283e+01   2.5000000e+02  -2.5061582e+00  -1.0404504e-01  -5.2433125e+00
   2.6091634e+01  -2.2968034e+01   2.5000000e+02  -2.2342076e+00  -4.0522920e-01  -5.4057068e+00
   2.6014971e+01  -2.2861034e+01   2.5000000e+02  -1.9603340e+00  -7.2232631e-01  -5.5329995e+00
   2.5934621e+01  -2.2756394e+01   2.5000000e+02  -1.6872976e+00  -1.0524492e+00  -5.6241133e+00
   2.5850676e+01  -2.2654226e+01   2.5000000e+02  -1.4173581e+00  -1.3924968e+00  -5.6781296e+00
   2.5763230e+01  -2.2554635e+01   2.5000000e+02  -1.1524304e+00  -1.7391371e+00  -5.6941629e+00
   2.5672383e+01  -2.2457726e+01   2.5000000e+02  -8.9432412e-01  -2.0887623e+00  -5.6713694e+00
   2.5578234e+01  -2.2363601e+01   2.5000000e+02  -6.4493841e-01  -2.4375169e+00  -5.6090834e+00
   2.5480888e+01  -2.2272356e+01   2.5000000e+02  -4.0642675e-01  -2.7813487e+00  -5.5070341e+00
   2.5380451e+01  -2.2184087e+01   2.5000000e+02  -1.8125994e-01  -3.1161085e+00  -5.3655926e+00
   2.5277033e+01  -2.2098885e+01   2.5000000e+02   2.7788364e-02  -3.4377035e+00  -5.1860037e+00
   2.5170746e+01  -2.2016839e+01   2.5000000e+02   2.1773326e-01  -3.7422832e+00  -4.9705633e+00
   2.5061703e+01  -2.1938034e+01   2.5000000e+02   3.8552465e-01  -4.0264683e+00  -4.7227114e+00
   2.4950021e+01  -2.1862551e+01   2.5000000e+02   5.2822286e-01  -4.2875953e+00  -4.4470305e+00
   2.4835818e+01  -2.1790468e+01   2.5000000e+02   6.4320305e-01  -4.5239793e+00  -4.1491157e+00
   2.4719216e+01  -2.1721859e+01   2.5000000e+02   7.2835451e-01  -4.7351497e+00  -3.8353190e+00
   2.4600336e+01  -2.1656796e+01   2.5000000e+02   7.8227168e-01  -4.9220309e+00  -3.5123535e+00
   2.4479304e+01  -2.1595345e+01   2.5000000e+02   8.0439509e-01  -5.0870036e+00  -3.1868046e+00
   2.4356246e+01  -2.1537569e+01   2.5000000e+02   7.9510479e-01  -5.2338267e+00  -2.8645736e+00
   2.4231289e+01  -2.1483527e+01   2.5000000e+02   7.5573483e-01  -5.3673891e+00  -2.5503430e+00
   2.4104564e+01  -2.1433276e+01   2.5000000e+02   6.8851619e-01  -5.4933104e+00  -2.2471433e+00
   2.3976201e+01  -2.1386867e+01   2.5000000e+02   5.9644739e-01  -5.6174444e+00  -1.9560568e+00
   2.3846332e+01  -2.1344346e+01   2.5000000e+02   4.8312083e-01  -5.7453378e+00  -1.6761447e+00
   2.3715091e+01  -2.1305759e+01   2.5000000e+02   3.5253450e-01  -5.8817337e+00  -1.4045724e+00
   2.3582613e+01  -2.1271144e+01   2.5000000e+02   2.0888900e-01  -6.0301678e+00  -1.1368931e+00
   2.3449032e+01  -2.1240537e+01   2.5000000e+02   5.6420781e-02  -6.1927073e+00  -8.6745542e-01
   2.3314487e+01  -2.1213968e+01   2.5000000e+02  -1.0074070e-01  -6.3698133e+00  -5.8987559e-01
   2.3179113e+01  -2.1191466e+01   2.5000000e+02  -2.5868261e-01  -6.5603540e+00  -2.9748346e-01
   2.3043048e+01  -2.1173053e+01   2.5000000e+02  -4.1379267e-01  -6.7616782e+00   1.6229793e-02
   2.2906432e+01  -2.1158749e+01   2.5000000e+02  -5.6280720e-01  -6.9697748e+00   3.5722847e-01
   2.2769404e+01  -2.1148566e+01   2.5000000e+02  -7.0285664e-01  -7.1794660e+00   7.3060129e-01
   2.2632101e+01  -2.1142517e+01   2.5000000e+02  -8.3146296e-01  -7.3846399e+00   1.1402907e+00
   2.2494664e+01  -2.1140607e+01   2.5000000e+02  -9.4654091e-01  -7.5784755e+00   1.5888324e+00
   2.2357233e+01  -2.1142839e+01   2.5000000e+02  -1.0463653e+00  -7.7537207e+00   2.0771895e+00
   2.2219947e+01  -2.1149209e+01   2.5000000e+02  -1.1295384e+00  -7.9029743e+00   2.6046123e+00
   2.2082945e+01  -2.1159712e+01   2.5000000e+02  -1.1949293e+00  -8.0190007e+00   3.1685685e+00
   2.1946367e+01  -2.1174336e+01   2.5000000e+02  -1.2416363e+00  -8.0950624e+00   3.7647208e+00
   2.1810352e+01  -2.1193067e+01   2.5000000e+02  -1.2689360e+00  -8.1252850e+00   4.3870176e+00
   2.1675037e+01  -2.1215886e+01   2.5000000e+02  -1.2762573e+00  -8.1050191e+00   5.0278671e+00
   2.1540561e+01  -2.1242768e+01   2.5000000e+02  -1.2631585e+00  -8.0311842e+00   5.6784026e+00
   2.1407062e+01  -2.1273688e+01   2.5000000e+02  -1.2292983e+00  -7.9025542e+00   6.3289043e+00
   2.1274674e+01  -2.1308613e+01   2.5000000e+02  -1.1744361e+00  -7.7199198e+00   6.9692872e+00
   2.1143535e+01  -2.1347507e+01   2.5000000e+02  -1.0984020e+00  -7.4861214e+00   7.5896162e+00
   2.1013778e+01  -2.1390331e+01   2.5000000e+02  -1.0010804e+00  -7.2058858e+00   8.1806771e+00
   2.0885538e+01  -2.1437040e+01   2.5000000e+02  -8.8240523e-01  -6.8855221e+00   8.7344000e+00
   2.0758945e+01  -2.1487588e+01   2.5000000e+02  -7.4235030e-01  -6.5324640e+00   9.2442244e+00
   2.0634131e+01  -2.1541921e+01   2.5000000e+02  -5.8097138e-01  -6.1547792e+00   9.7052278e+00
   2.0511225e+01  -2.1599984e+01   2.5000000e+02  -3.9843310e-01  -5.7606544e+00   1.0114157e+01
   2.0390356e+01  -2.1661718e+01   2.5000000e+02  -1.9508047e-01  -5.3579669e+00   1.0469280e+01
   2.0271649e+01  -2.1727059e+01   2.5000000e+02   2.8487219e-02  -4.9539450e+00   1.0770157e+01
   2.0155228e+01  -2.1795940e+01   2.5000000e+02   2.7135741e-01  -4.5549764e+00   1.1017363e+01
   2.0041217e+01  -2.1868290e+01   2.5000000e+02   5.3225376e-01  -4.1665275e+00   1.1212208e+01
   1.9929736e+01  -2.1944034e+01   2.5000000e+02   8.0951386e-01  -3.7931387e+00   1.1356491e+01
   1.9820903e+01  -2.2023094e+01   2.5000000e+02   1.1010950e+00  -3.4385000e+00   1.1452296e+01
   1.9714834e+01  -2.2105388e+01   2.5000000e+02   1.4045932e+00  -3.1055490e+00   1.1501846e+01
   1.9611643e+01  -2.2190831e+01   2.5000000e+02   1.7172829e+00  -2.7965724e+00   1.1507398e+01
   1.9511443e+01  -2.2279334e+01   2.5000000e+02   2.0361557e+00  -2.5132981e+00   1.1471187e+01
   1.9414341e+01  -2.2370806e+01   2.5000000e+02   2.3579735e+00  -2.2569506e+00   1.1395411e+01
   1.9320445e+01  -2.2465151e+01   2.5000000e+02   2.6793083e+00  -2.0283193e+00   1.1282234e+01
   1.9229858e+01  -2.2562272e+01   2.5000000e+02   2.9966126e+00  -1.8277737e+00   1.1133809e+01
   1.9142681e+01  -2.2662066e+01   2.5000000e+02   3.3062676e+00  -1.6552926e+00   1.0952322e+01
   1.9059011e+01  -2.2764431e+01   2.5000000e+02   3.6046840e+00  -1.5104848e+00   1.0740007e+01
   1.8978944e+01  -2.2869257e+01   2.5000000e+02   3.8883580e+00  -1.3926237e+00   1.0499194e+01
   1.8902571e+01  -2.2976436e+01   2.5000000e+02   4.1539956e+00  -1.3006898e+00   1.0232300e+01
   1.8829981e+01  -2.3085855e+01   2.5000000e+02   4.3985860e+00  -1.2334359e+00   9.9418452e+00
   1.8761258e+01  -2.3197399e+01   2.5000000e+02   4.6195024e+00  -1.1894544e+00   9.6304355e+00
   1.8696485e+01  -2.3310949e+01   2.5000000e+02   4.8145852e+00  -1.1672574e+00   9.3007396e+00
   1.8635740e+01  -2.3426387e+01   2.5000000e+02   4.9822147e+00  -1.1653371e+00   8.9554266e+00
   1.8579096e+01  -2.3543589e+01   2.5000000e+02   5.1213279e+00  -1.1822005e+00   8.5971180e+00
   1.8526625e+01  -2.3662432e+01   2.5000000e+02   5.2314272e+00  -1.2164101e+00   8.2282829e+00
   1.8478394e+01  -2.3782787e+01   2.5000000e+02   5.3124982e+00  -1.2665620e+00   7.8511691e+00
   1.8434464e+01  -2.3904529e+01   2.5000000e+02   5.3649015e+00  -1.3312815e+00   7.4676958e+00
   1.8394896e+01  -2.4027524e+01   2.5000000e+02   5.3892026e+00  -1.4091978e+00   7.0794527e+00
   1.8359743e+01  -2.4151643e+01   2.5000000e+02   5.3859904e+00  -1.4989242e+00   6.6876719e+00
   1.8329057e+01  -2.4276751e+01   2.5000000e+02   5.3557091e+00  -1.5990550e+00   6.2933425e+00
   1.8302882e+01  -2.4402714e+01   2.5000000e+02   5.2985337e+00  -1.7081603e+00   5.8973363e+00
   1.8281261e+01  -2.4529395e+01   2.5000000e+02   5.2143391e+00  -1.8248195e+00   5.5006010e+00
   1.8264231e+01  -2.4656656e+01   2.5000000e+02   5.1027493e+00  -1.9476303e+00   5.1043514e+00
   1.8251824e+01  -2.4784360e+01   2.5000000e+02   4.9632817e+00  -2.0752336e+00   4.7102239e+00
   1.8244067e+01  -2.4912367e+01   2.5000000e+02   4.7955607e+00  -2.2063197e+00   4.3203846e+00
   1.8240985e+01  -2.5040537e+01   2.5000000e+02   4.5995594e+00  -2.3396453e+00   3.9375201e+00
   1.8242593e+01  -2.5168729e+01   2.5000000e+02   4.3758197e+00  -2.4740006e+00   3.5647625e+00
   1.8248907e+01  -2.5296802e+01   2.5000000e+02   4.1256428e+00  -2.6082438e+00   3.2054942e+00
   1.8259933e+01  -2.5424615e+01   2.5000000e+02   3.8511875e+00  -2.7412648e+00   2.8631280e+00
   1.8275674e+01  -2.5552025e+01   2.5000000e+02   3.5555044e+00  -2.8720206e+00   2.5408226e+00
   1.8296128e+01  -2.5678892e+01   2.5000000e+02   3.2424557e+00  -2.9995557e+00   2.2411854e+00
   1.8321288e+01  -2.5805073e+01   2.5000000e+02   2.9165737e+00  -3.1230288e+00   1.9660112e+00
   1.8351141e+01  -2.5930428e+01   2.5000000e+02   2.5828063e+00  -3.2417390e+00   1.7160385e+00
   1.8385667e+01  -2.6054815e+01   2.5000000e+02   2.2462208e+00  -3.3551358e+00   1.4907969e+00
   1.8424844e+01  -2.6178095e+01   2.5000000e+02   1.9116325e+00  -3.4628256e+00   1.2885202e+00
   1.8468642e+01  -2.6300127e+01   2.5000000e+02   1.5832431e+00  -3.5645159e+00   1.1062170e+00
   1.8517026e+01  -2.6420775e+01   2.5000000e+02   1.2642749e+00  -3.6599582e+00   9.3983642e-01
   1.8569957e+01  -2.6539900e+01   2.5000000e+02   9.5671402e-01  -3.7488670e+00   7.8457131e-01
   1.8627387e+01  -2.6657366e+01   2.5000000e+02   6.6113284e-01  -3.8308096e+00   6.3526503e-01
   1.8689266e+01  -2.6773038e+01   2.5000000e+02   3.7666818e-01  -3.9051391e+00   4.8685185e-01
   1.8755537e+01  -2.6886784e+01   2.5000000e+02   1.0114647e-01  -3.9709179e+00   3.3483692e-01
   1.8826136e+01  -2.6998473e+01   2.5000000e+02  -1.6864240e-01  -4.0269001e+00   1.7572193e-01
   1.8900996e+01  -2.7107974e+01   2.5000000e+02  -4.3656434e-01  -4.0715790e+00   7.3282906e-03
   1.8980042e+01  -2.7215161e+01   2.5000000e+02  -7.0668932e-01  -4.1032671e+00  -1.7098352e-01
   1.9063196e+01  -2.7319909e+01   2.5000000e+02  -9.8280878e-01  -4.1202616e+00  -3.5828495e-01
   1.9150371e+01  -2.7422096e+01   2.5000000e+02  -1.2679807e+00  -4.1210191e+00  -5.5218998e-01
   1.9241478e+01  -2.7521601e+01   2.5000000e+02  -1.5641609e+00  -4.1043664e+00  -7.4917225e-01
   1.9336421e+01  -2.7618308e+01   2.5000000e+02  -1.8719512e+00  -4.0696506e+00  -9.4498522e-01
   1.9435097e+01  -2.7712102e+01   2.5000000e+02  -2.1904885e+00  -4.0168408e+00  -1.1351947e+00
   1.9537402e+01  -2.7802872e+01   2.5000000e+02  -2.5175198e+00  -3.9465221e+00  -1.3157487e+00
   1.9643223e+01  -2.7890511e+01   2.5000000e+02  -2.8496012e+00  -3.8597604e+00  -1.4834539e+00
   1.9752443e+01  -2.7974914e+01   2.5000000e+02  -3.1824347e+00  -3.7578768e+00  -1.6363565e+00
   1.9864941e+01  -2.8055980e+01   2.5000000e+02  -3.5112721e+00  -3.6421313e+00  -1.7739057e+00
   1.9980590e+01  -2.8133613e+01   2.5000000e+02  -3.8313173e+00  -3.5133901e+00  -1.8968793e+00
   2.0099259e+01  -2.8207718e+01   2.5000000e+02  -4.1380687e+00  -3.3718487e+00  -2.0071109e+00
   2.0220812e+01  -2.8278208e+01   2.5000000e+02  -4.4275690e+00  -3.2168425e+00  -2.1070158e+00
   2.0345108e+01  -2.8344997e+01   2.5000000e+02  -4.6965048e+00  -3.0468268e+00  -2.1990718e+00
   2.0472005e+01  -2.8408004e+01   2.5000000e+02  -4.9422086e+00  -2.8594857e+00  -2.2852962e+00
   2.0601352e+01  -2.8467152e+01   2.5000000e+02  -5.1625504e+00  -2.6519790e+00  -2.3668062e+00
   2.0732999e+01  -2.8522371e+01   2.5000000e+02  -5.3558200e+00  -2.4212409e+00  -2.4435557e+00
   2.0866788e+01  -2.8573592e+01   2.5000000e+02  -5.5205865e+00  -2.1643120e+00  -2.5142166e+00
   2.1002562e+01  -2.8620753e+01   2.5000000e+02  -5.6556427e+00  -1.8785987e+00  -2.5761784e+00
   2.1140158e+01  -2.8663798e+01   2.5000000e+02  -5.7599907e+00  -1.5621045e+00  -2.6256089e+00
   2.1279410e+01  -2.8702672e+01   2.5000000e+02  -5.8328979e+00  -1.2136053e+00  -2.6575752e+00
   2.1420151e+01  -2.8737329e+01   2.5000000e+02  -5.8740088e+00  -8.3281422e-01  -2.6661084e+00
   2.1562211e+01  -2.8767726e+01   2.5000000e+02  -5.8834613e+00  -4.2060459e-01  -2.6443370e+00
   2.1705417e+01  -2.8793825e+01   2.5000000e+02  -5.8620090e+00   2.0707275e-02  -2.5846684e+00
   2.1849595e+01  -2.8815595e+01   2.5000000e+02  -5.8111187e+00   4.8703736e-01  -2.4791192e+00
   2.1994569e+01  -2.8833009e+01   2.5000000e+02  -5.7330291e+00   9.7222623e-01  -2.3198680e+00
   2.2140162e+01  -2.8846046e+01   2.5000000e+02  -5.6307677e+00   1.4678704e+00  -2.1000015e+00
   2.2286196e+01  -2.8854688e+01   2.5000000e+02  -5.5081146e+00   1.9634059e+00  -1.8144255e+00
   2.2432492e+01  -2.8858927e+01   2.5000000e+02  -5.3695091e+00   2.4465176e+00  -1.4607552e+00
   2.2578871e+01  -2.8858755e+01   2.5000000e+02  -5.2198881e+00   2.9039144e+00  -1.0400927e+00
   2.2725153e+01  -2.8854175e+01   2.5000000e+02  -5.0644637e+00   3.3223463e+00  -5.5740664e-01
   2.3482750e+01  -2.8890663e+01   2.5000000e+02  -4.1183072e+00   4.3441472e+00   2.7595428e+00
   2.3625094e+01  -2.8859884e+01   2.5000000e+02  -3.9938688e+00   4.3629689e+00   3.3382904e+00
   2.3766142e+01  -2.8824969e+01   2.5000000e+02  -3.8883391e+00   4.3222498e+00   3.8858664e+00
   2.3905735e+01  -2.8785956e+01   2.5000000e+02  -3.8017128e+00   4.2303280e+00   4.3922529e+00
   2.4043712e+01  -2.8742890e+01   2.5000000e+02  -3.7332756e+00   4.0966228e+00   4.8502542e+00
   2.4179920e+01  -2.8695823e+01   2.5000000e+02  -3.6818320e+00   3.9308363e+00   5.2555201e+00
   2.4314203e+01  -2.8644807e+01   2.5000000e+02  -3.6459699e+00   3.7423082e+00   5.6062327e+00
   2.4446412e+01  -2.8589902e+01   2.5000000e+02  -3.6242262e+00   3.5394889e+00   5.9027202e+00
   2.4576399e+01  -2.8531171e+01   2.5000000e+02  -3.6152444e+00   3.3296468e+00   6.1469018e+00
   2.4704021e+01  -2.8468680e+01   2.5000000e+02  -3.6178480e+00   3.1187340e+00   6.3417564e+00
   2.4829135e+01  -2.8402501e+01   2.5000000e+02  -3.6310600e+00   2.9114235e+00   6.4908191e+00
   2.4951607e+01  -2.8332709e+01   2.5000000e+02  -3.6540793e+00   2.7112372e+00   6.5977874e+00
   2.5071302e+01  -2.8259385e+01   2.5000000e+02  -3.6862380e+00   2.5207796e+00   6.6662073e+00
   2.5188091e+01  -2.8182611e+01   2.5000000e+02  -3.7269472e+00   2.3419699e+00   6.6992979e+00
   2.5301850e+01  -2.8102474e+01   2.5000000e+02  -3.7756322e+00   2.1762707e+00   6.6998836e+00
   2.5412458e+01  -2.8019064e+01   2.5000000e+02  -3.8317017e+00   2.0248864e+00   6.6704109e+00
   2.5519799e+01  -2.7932477e+01   2.5000000e+02  -3.8945288e+00   1.8888812e+00   6.6130478e+00
   2.5623761e+01  -2.7842807e+01   2.5000000e+02  -3.9634987e+00   1.7692400e+00   6.5297901e+00
   2.5724237e+01  -2.7750157e+01   2.5000000e+02  -4.0380423e+00   1.6668171e+00   6.4225917e+00
   2.5821125e+01  -2.7654630e+01   2.5000000e+02  -4.1177353e+00   1.5822495e+00   6.2934037e+00
   2.5914327e+01  -2.7556331e+01   2.5000000e+02  -4.2023618e+00   1.5158200e+00   6.1441492e+00
   2.6003751e+01  -2.7455370e+01   2.5000000e+02  -4.2919252e+00   1.4673161e+00   5.9766172e+00
   2.6089309e+01  -2.7351859e+01   2.5000000e+02  -4.3866002e+00   1.4359495e+00   5.7922824e+00
   2.6170918e+01  -2.7245912e+01   2.5000000e+02  -4.4865847e+00   1.4203381e+00   5.5921259e+00
   2.6248502e+01  -2.7137645e+01   2.5000000e+02  -4.5918727e+00   1.4185700e+00   5.3765125e+00
   2.6321987e+01  -2.7027176e+01   2.5000000e+02  -4.7019997e+00   1.4283547e+00   5.1451787e+00
   2.6391306e+01  -2.6914627e+01   2.5000000e+02  -4.8157972e+00   1.4471976e+00   4.8973734e+00
   2.6456397e+01  -2.6800120e+01   2.5000000e+02  -4.9312562e+00   1.4726055e+00   4.6321139e+00
   2.6517203e+01  -2.6683778e+01   2.5000000e+02  -5.0455185e+00   1.5022536e+00   4.3485386e+00
   2.6573672e+01  -2.6565729e+01   2.5000000e+02  -5.1550241e+00   1.5341001e+00   4.0462792e+00
   2.6625757e+01  -2.6446098e+01   2.5000000e+02  -5.2558143e+00   1.5664545e+00   3.7257273e+00
   2.6673417e+01  -2.6325015e+01   2.5000000e+02  -5.3438966e+00   1.5979770e+00   3.3882178e+00
   2.6716615e+01  -2.6202608e+01   2.5000000e+02  -5.4156453e+00   1.6276621e+00   3.0360086e+00
   2.6755319e+01  -2.6079009e+01   2.5000000e+02  -5.4681308e+00   1.6547923e+00   2.6721627e+00
   2.6789504e+01  -2.5954348e+01   2.5000000e+02  -5.4993607e+00   1.6788980e+00   2.3002952e+00
   2.6819147e+01  -2.5828758e+01   2.5000000e+02  -5.5084001e+00   1.6997218e+00   1.9243052e+00
   2.6844232e+01  -2.5702371e+01   2.5000000e+02  -5.4953862e+00   1.7171797e+00   1.5480901e+00
   2.6864748e+01  -2.5575320e+01   2.5000000e+02  -5.4614642e+00   1.7313224e+00   1.1752989e+00
   2.6880688e+01  -2.5447738e+01   2.5000000e+02  -5.4086665e+00   1.7422853e+00   8.0910553e-01
   2.6892049e+01  -2.5319759e+01   2.5000000e+02  -5.3397477e+00   1.7502228e+00   4.5201385e-01
   2.6898836e+01  -2.5191515e+01   2.5000000e+02  -5.2579714e+00   1.7552249e+00   1.0567372e-01
   2.6901055e+01  -2.5063141e+01   2.5000000e+02  -5.1668476e+00   1.7572249e+00  -2.2926112e-01
   2.6898718e+01  -2.4934768e+01   2.5000000e+02  -5.0698032e+00   1.7558923e+00  -5.5323271e-01
   2.6891843e+01  -2.4806529e+01   2.5000000e+02  -4.9698215e+00   1.7505268e+00  -8.6774710e-01
   2.6880449e+01  -2.4678557e+01   2.5000000e+02  -4.8690710e+00   1.7399675e+00  -1.1752343e+00
   2.6864563e+01  -2.4550981e+01   2.5000000e+02  -4.7685873e+00   1.7225309e+00  -1.4787435e+00
   2.6844215e+01  -2.4423934e+01   2.5000000e+02  -4.6680795e+00   1.6960065e+00  -1.7814913e+00
   2.6819438e+01  -2.4297543e+01   2.5000000e+02  -4.5658935e+00   1.6577217e+00  -2.0863577e+00
   2.6790271e+01  -2.4171938e+01   2.5000000e+02  -4.4591928e+00   1.6046926e+00  -2.3953271e+00
   2.6756755e+01  -2.4047245e+01   2.5000000e+02  -4.3443256e+00   1.5338447e+00  -2.7090581e+00
   2.6718937e+01  -2.3923592e+01   2.5000000e+02  -4.2173609e+00   1.4422880e+00  -3.0265866e+00
   2.6676867e+01  -2.3801102e+01   2.5000000e+02  -4.0746867e+00   1.3275905e+00  -3.3453080e+00
   2.6630600e+01  -2.3679898e+01   2.5000000e+02  -3.9135877e+00   1.1880164e+00  -3.6611862e+00
   2.6580191e+01  -2.3560103e+01   2.5000000e+02  -3.7326674e+00   1.0226736e+00  -3.9692105e+00
   2.6525703e+01  -2.3441835e+01   2.5000000e+02  -3.5320443e+00   8.3154917e-01  -4.2639736e+00
   2.6467201e+01  -2.3325214e+01   2.5000000e+02  -3.3132808e+00   6.1544342e-01  -4.5402583e+00
   2.6404752e+01  -2.3210354e+01   2.5000000e+02  -3.0790619e+00   3.7580359e-01  -4.7935224e+00
   2.6338428e+01  -2.3097370e+01   2.5000000e+02  -2.8327440e+00   1.1454544e-01  -5.0201427e+00
   2.6268304e+01  -2.2986375e+01   2.5000000e+02  -2.5778553e+00  -1.6612887e-01  -5.2174447e+00
   2.6194458e+01  -2.2877477e+01   2.5000000e+02  -2.3176815e+00  -4.6386017e-01  -5.3835234e+00
   2.6116972e+01  -2.2770784e+01   2.5000000e+02  -2.0550282e+00  -7.7617164e-01  -5.5169422e+00
   2.6035928e+01  -2.2666402e+01   2.5000000e+02  -1.7921571e+00  -1.1004588e+00  -5.6164373e+00
   2.5951415e+01  -2.2564433e+01   2.5000000e+02  -1.5309085e+00  -1.4339228e+00  -5.6807024e+00
   2.5863521e+01  -2.2464976e+01   2.5000000e+02  -1.2729020e+00  -1.7735070e+00  -5.7083229e+00
   2.5772340e+01  -2.2368131e+01   2.5000000e+02  -1.0197936e+00  -2.1158303e+00  -5.6978563e+00
   2.5677967e+01  -2.2273990e+01   2.5000000e+02  -7.7346214e-01  -2.4572096e+00  -5.6480373e+00
   2.5580500e+01  -2.2182646e+01   2.5000000e+02  -5.3614488e-01  -2.7936873e+00  -5.5580438e+00
   2.5480038e+01  -2.2094189e+01   2.5000000e+02  -3.1046474e-01  -3.1211445e+00  -5.4277755e+00
   2.5376684e+01  -2.2008704e+01   2.5000000e+02  -9.9386657e-02  -3.4354453e+00  -5.2580996e+00
   2.5270544e+01  -2.1926274e+01   2.5000000e+02   9.3894152e-02  -3.7326164e+00  -5.0510343e+00
   2.5161723e+01  -2.1846979e+01   2.5000000e+02   2.6611340e-01  -4.0090737e+00  -4.8098446e+00
   2.5050331e+01  -2.1770896e+01   2.5000000e+02   4.1410989e-01  -4.2618622e+00  -4.5390574e+00
   2.4936480e+01  -2.1698100e+01   2.5000000e+02   5.3502696e-01  -4.4889276e+00  -4.2443548e+00
   2.4820282e+01  -2.1628659e+01   2.5000000e+02   6.2651254e-01  -4.6893869e+00  -3.9323352e+00
   2.4701851e+01  -2.1562642e+01   2.5000000e+02   6.8690230e-01  -4.8637358e+00  -3.6101629e+00
   2.4581305e+01  -2.1500112e+01   2.5000000e+02   7.1537290e-01  -5.0139805e+00  -3.2850841e+00
   2.4458761e+01  -2.1441130e+01   2.5000000e+02   7.1204738e-01  -5.1436297e+00  -2.9638581e+00
   2.4334339e+01  -2.1385751e+01   2.5000000e+02   6.7802237e-01  -5.2575140e+00  -2.6521814e+00
   2.4208160e+01  -2.1334030e+01   2.5000000e+02   6.1532691e-01  -5.3614436e+00  -2.3541720e+00
   2.4080347e+01  -2.1286017e+01   2.5000000e+02   5.2680048e-01  -5.4617307e+00  -2.0719846e+00
   2.3951023e+01  -2.1241756e+01   2.5000000e+02   4.1591550e-01  -5.5646412e+00  -1.8056215e+00
   2.3820312e+01  -2.1201292e+01   2.5000000e+02   2.8657988e-01  -5.6758516e+00  -1.5529668e+00
   2.3688341e+01  -2.1164662e+01   2.5000000e+02   1.4292137e-01  -5.7999714e+00  -1.3100081e+00
   2.3555235e+01  -2.1131903e+01   2.5000000e+02  -1.0893736e-02  -5.9402054e+00  -1.0712048e+00
   2.3421124e+01  -2.1103045e+01   2.5000000e+02  -1.7081744e-01  -6.0981343e+00  -8.2995837e-01
   2.3286135e+01  -2.1078115e+01   2.5000000e+02  -3.3303610e-01  -6.2736592e+00  -5.7908786e-01
   2.3150396e+01  -2.1057139e+01   2.5000000e+02  -4.9404265e-01  -6.4650406e+00  -3.1130648e-01
   2.3014039e+01  -2.1040136e+01   2.5000000e+02  -6.5069043e-01  -6.6690091e+00  -1.9661333e-02
   2.2877192e+01  -2.1027122e+01   2.5000000e+02  -8.0021857e-01  -6.8809588e+00   3.0210559e-01
   2.2739985e+01  -2.1018110e+01   2.5000000e+02  -9.4024891e-01  -7.0951496e+00   6.5922096e-01
   2.2602551e+01  -2.1013108e+01   2.5000000e+02  -1.0687727e+00  -7.3049423e+00   1.0556008e+00
   2.2465019e+01  -2.1012121e+01   2.5000000e+02  -1.1841219e+00  -7.5030723e+00   1.4936528e+00
   2.2327520e+01  -2.1015150e+01   2.5000000e+02  -1.2849213e+00  -7.6819177e+00   1.9740950e+00
   2.2190185e+01  -2.1022193e+01   2.5000000e+02  -1.3700370e+00  -7.8338021e+00   2.4958544e+00
   2.2053146e+01  -2.1033242e+01   2.5000000e+02  -1.4385311e+00  -7.9513098e+00   3.0560120e+00
   2.1916531e+01  -2.1048287e+01   2.5000000e+02  -1.4896160e+00  -8.0276310e+00   3.6498524e+00
   2.1780472e+01  -2.1067314e+01   2.5000000e+02  -1.5226229e+00  -8.0569082e+00   4.2709327e+00
   2.1645099e+01  -2.1090304e+01   2.5000000e+02  -1.5369916e+00  -8.0345975e+00   4.9113034e+00
   2.1510540e+01  -2.1117235e+01   2.5000000e+02  -1.5322592e+00  -7.9577987e+00   5.5618219e+00
   2.1376925e+01  -2.1148081e+01   2.5000000e+02  -1.5080560e+00  -7.8255224e+00   6.2125481e+00
   2.1244380e+01  -2.1182813e+01   2.5000000e+02  -1.4640959e+00  -7.6388375e+00   6.8532782e+00
   2.1113034e+01  -2.1221398e+01   2.5000000e+02  -1.4001593e+00  -7.4008775e+00   7.4740627e+00
   2.0983013e+01  -2.1263798e+01   2.5000000e+02  -1.3160739e+00  -7.1166553e+00   8.0657670e+00
   2.0854442e+01  -2.1309973e+01   2.5000000e+02  -1.2116870e+00  -6.7927207e+00   8.6205224e+00
   2.0727444e+01  -2.1359879e+01   2.5000000e+02  -1.0868608e+00  -6.4366861e+00   9.1320401e+00
   2.0602144e+01  -2.1413467e+01   2.5000000e+02  -9.4149164e-01  -6.0567058e+00   9.5957401e+00
   2.0478663e+01  -2.1470685e+01   2.5000000e+02  -7.7554804e-01  -5.6609386e+00   1.0008747e+01
   2.0357120e+01  -2.1531480e+01   2.5000000e+02  -5.8913354e-01  -5.2571095e+00   1.0369715e+01
   2.0237635e+01  -2.1595791e+01   2.5000000e+02  -3.8258935e-01  -4.8522001e+00   1.0678545e+01
   2.0120326e+01  -2.1663558e+01   2.5000000e+02  -1.5654827e-01  -4.4522559e+00   1.0936109e+01
   2.0005307e+01  -2.1734714e+01   2.5000000e+02   8.7981158e-02  -4.0623242e+00   1.1143947e+01
   1.9892693e+01  -2.1809191e+01   2.5000000e+02   3.4960167e-01  -3.6865124e+00   1.1304016e+01
   1.9782595e+01  -2.1886917e+01   2.5000000e+02   6.2652206e-01  -3.3280742e+00   1.1418495e+01
   1.9675124e+01  -2.1967816e+01   2.5000000e+02   9.1658831e-01  -2.9895509e+00   1.1489640e+01
   1.9570388e+01  -2.2051811e+01   2.5000000e+02   1.2173448e+00  -2.6728868e+00   1.1519691e+01
   1.9468492e+01  -2.2138818e+01   2.5000000e+02   1.5260708e+00  -2.3795383e+00   1.1510815e+01
   1.9369541e+01  -2.2228755e+01   2.5000000e+02   1.8398671e+00  -2.1105639e+00   1.1465074e+01
   1.9273635e+01  -2.2321533e+01   2.5000000e+02   2.1556738e+00  -1.8666658e+00   1.1384429e+01
   1.9180874e+01  -2.2417061e+01   2.5000000e+02   2.4703317e+00  -1.6482373e+00   1.1270748e+01
   1.9091353e+01  -2.2515247e+01   2.5000000e+02   2.7806265e+00  -1.4553686e+00   1.1125835e+01
   1.9005168e+01  -2.2615993e+01   2.5000000e+02   3.0833161e+00  -1.2878746e+00   1.0951469e+01
   1.8922409e+01  -2.2719203e+01   2.5000000e+02   3.3752038e+00  -1.1452966e+00   1.0749425e+01
   1.8843164e+01  -2.2824773e+01   2.5000000e+02   3.6531609e+00  -1.0269362e+00   1.0521522e+01
   1.8767518e+01  -2.2932601e+01   2.5000000e+02   3.9142218e+00  -9.3190000e-01   1.0269643e+01
   1.8695556e+01  -2.3042579e+01   2.5000000e+02   4.1556341e+00  -8.5915736e-01   9.9957744e+00
   1.8627356e+01  -2.3154600e+01   2.5000000e+02   4.3749532e+00  -8.0758960e-01   9.7020041e+00
   1.8562994e+01  -2.3268552e+01   2.5000000e+02   4.5701119e+00  -7.7605276e-01   9.3905451e+00
   1.8502543e+01  -2.3384322e+01   2.5000000e+02   4.7395074e+00  -7.6342008e-01   9.0637026e+00
   1.8446075e+01  -2.3501796e+01   2.5000000e+02   4.8820568e+00  -7.6860742e-01   8.7238224e+00
   1.8393654e+01  -2.3620856e+01   2.5000000e+02   4.9971998e+00  -7.9054793e-01   8.3732164e+00
   1.8345344e+01  -2.3741382e+01   2.5000000e+02   5.0848751e+00  -8.2819362e-01   8.0140563e+00
   1.8301205e+01  -2.3863256e+01   2.5000000e+02   5.1454214e+00  -8.8048144e-01   7.6482577e+00
   1.8261291e+01  -2.3986353e+01   2.5000000e+02   5.1794112e+00  -9.4628735e-01   7.2774338e+00
   1.8225656e+01  -2.4110551e+01   2.5000000e+02   5.1874840e+00  -1.0244435e+00   6.9028418e+00
   1.8194347e+01  -2.4235723e+01   2.5000000e+02   5.1701452e+00  -1.1137091e+00   6.5254606e+00
   1.8167407e+01  -2.4361744e+01   2.5000000e+02   5.1276298e+00  -1.2128082e+00   6.1460933e+00
   1.8144879e+01  -2.4488485e+01   2.5000000e+02   5.0598366e+00  -1.3204643e+00   5.7655641e+00
   1.8126796e+01  -2.4615817e+01   2.5000000e+02   4.9663452e+00  -1.4354050e+00   5.3849158e+00
   1.8113192e+01  -2.4743611e+01   2.5000000e+02   4.8465553e+00  -1.5564202e+00   5.0055852e+00
   1.8104094e+01  -2.4871735e+01   2.5000000e+02   4.6998845e+00  -1.6823409e+00   4.6295396e+00
   1.8099525e+01  -2.5000059e+01   2.5000000e+02   4.5260139e+00  -1.8120478e+00   4.2592907e+00
   1.8099504e+01  -2.5128449e+01   2.5000000e+02   4.3251385e+00  -1.9444473e+00   3.8978432e+00
   1.8104045e+01  -2.5256773e+01   2.5000000e+02   4.0981615e+00  -2.0784550e+00   3.5485177e+00
   1.8113158e+01  -2.5384899e+01   2.5000000e+02   3.8468272e+00  -2.2129845e+00   3.2147270e+00
   1.8126848e+01  -2.5512693e+01   2.5000000e+02   3.5737711e+00  -2.3469474e+00   2.8997119e+00
   1.8145116e+01  -2.5640021e+01   2.5000000e+02   3.2824739e+00  -2.4792805e+00   2.6062515e+00
   1.8167958e+01  -2.5766751e+01   2.5000000e+02   2.9771262e+00  -2.6089811e+00   2.3363917e+00
   1.8195363e+01  -2.5892749e+01   2.5000000e+02   2.6624289e+00  -2.7351416e+00   2.0912243e+00
   1.8227318e+01  -2.6017883e+01   2.5000000e+02   2.3433080e+00  -2.8570050e+00   1.8706970e+00
   1.8263805e+01  -2.6142020e+01   2.5000000e+02   2.0245899e+00  -2.9739733e+00   1.6735332e+00
   1.8304799e+01  -2.6265030e+01   2.5000000e+02   1.7106351e+00  -3.0855944e+00   1.4972445e+00
   1.8350270e+01  -2.6386779e+01   2.5000000e+02   1.4050072e+00  -3.1915340e+00   1.3382607e+00
   1.8400186e+01  -2.6507140e+01   2.5000000e+02   1.1101444e+00  -3.2915196e+00   1.1921588e+00
   1.8454507e+01  -2.6625982e+01   2.5000000e+02   8.2717697e-01  -3.3852446e+00   1.0540220e+00
   1.8513188e+01  -2.6743179e+01   2.5000000e+02   5.5581609e-01  -3.4722878e+00   9.1883868e-01
   1.8576181e+01  -2.6858603e+01   2.5000000e+02   2.9441676e-01  -3.5520427e+00   7.8193283e-01
   1.8643430e+01  -2.6972130e+01   2.5000000e+02   4.0156026e-02  -3.6236458e+00   6.3939142e-01
   1.8714876e+01  -2.7083636e+01   2.5000000e+02  -2.1065304e-01  -3.6859748e+00   4.8840791e-01
   1.8790455e+01  -2.7192999e+01   2.5000000e+02  -4.6216453e-01  -3.7376731e+00   3.2754357e-01
   1.8870096e+01  -2.7300101e+01   2.5000000e+02  -7.1855065e-01  -3.7772287e+00   1.5686348e-01
   1.8953724e+01  -2.7404824e+01   2.5000000e+02  -9.8354325e-01  -3.8031221e+00  -2.2086201e-02
   1.9041259e+01  -2.7507052e+01   2.5000000e+02  -1.2600219e+00  -3.8139932e+00  -2.0644184e-01
   1.9132616e+01  -2.7606672e+01   2.5000000e+02  -1.5496842e+00  -3.8088219e+00  -3.9233319e-01
   1.9227705e+01  -2.7703575e+01   2.5000000e+02  -1.8528349e+00  -3.7870841e+00  -5.7531516e-01
   1.9326430e+01  -2.7797652e+01   2.5000000e+02  -2.1683099e+00  -3.7488536e+00  -7.5088018e-01
   1.9428692e+01  -2.7888798e+01   2.5000000e+02  -2.4935735e+00  -3.6948045e+00  -9.1499696e-01
   1.9534387e+01  -2.7976912e+01   2.5000000e+02  -2.8249463e+00  -3.6261015e+00  -1.0645854e+00
   1.9643403e+01  -2.8061895e+01   2.5000000e+02  -3.1579403e+00  -3.5441885e+00  -1.1978673e+00
   1.9755629e+01  -2.8143652e+01   2.5000000e+02  -3.4876841e+00  -3.4504998e+00  -1.3145562e+00
   1.9870945e+01  -2.8222089e+01   2.5000000e+02  -3.8093088e+00  -3.3461339e+00  -1.4157888e+00
   1.9989228e+01  -2.8297119e+01   2.5000000e+02  -4.1183169e+00  -3.2315538e+00  -1.5038619e+00
   2.0110352e+01  -2.8368657e+01   2.5000000e+02  -4.4108119e+00  -3.1063902e+00  -1.5818069e+00
   2.0234185e+01  -2.8436620e+01   2.5000000e+02  -4.6836009e+00  -2.9693670e+00  -1.6528569e+00
   2.0360592e+01  -2.8500932e+01   2.5000000e+02  -4.9341846e+00  -2.8183639e+00  -1.7199082e+00
   2.0489434e+01  -2.8561520e+01   2.5000000e+02  -5.1606314e+00  -2.6506173e+00  -1.7850802e+00
   2.0620570e+01  -2.8618313e+01   2.5000000e+02  -5.3614120e+00  -2.4629943e+00  -1.8494116e+00
   2.0753853e+01  -2.8671247e+01   2.5000000e+02  -5.5352366e+00  -2.2522858e+00  -1.9126716e+00
   2.0889134e+01  -2.8720262e+01   2.5000000e+02  -5.6809361e+00  -2.0154768e+00  -1.9733440e+00
   2.1026261e+01  -2.8765300e+01   2.5000000e+02  -5.7974068e+00  -1.7499613e+00  -2.0286775e+00
   2.1165080e+01  -2.8806309e+01   2.5000000e+02  -5.8836354e+00  -1.4536977e+00  -2.0747397e+00
   2.1305433e+01  -2.8843244e+01   2.5000000e+02  -5.9387782e+00  -1.1253582e+00  -2.1064673e+00
   2.1447160e+01  -2.8876060e+01   2.5000000e+02  -5.9622780e+00  -7.6450177e-01  -2.1177476e+00
   2.1590100e+01  -2.8904720e+01   2.5000000e+02  -5.9540071e+00  -3.7181538e-01  -2.1014644e+00
   2.1734090e+01  -2.8929190e+01   2.5000000e+02  -5.9144004e+00   5.0554621e-02  -2.0496977e+00
   2.1878962e+01  -2.8949443e+01   2.5000000e+02  -5.8445809e+00   4.9861878e-01  -1.9540656e+00
   2.2024552e+01  -2.8965454e+01   2.5000000e+02  -5.7464504e+00   9.6624636e-01  -1.8063297e+00
   2.2170691e+01  -2.8977206e+01   2.5000000e+02  -5.6227547e+00   1.4449676e+00  -1.5991706e+00
   2.2317210e+01  -2.8984684e+01   2.5000000e+02  -5.4770891e+00   1.9241046e+00  -1.3271468e+00
   2.2463940e+01  -2.8987880e+01   2.5000000e+02  -5.3138422e+00   2.3912256e+00  -9.8759705e-01
   2.2610713e+01  -2.8986789e+01   2.5000000e+02  -5.1380562e+00   2.8329515e+00  -5.8138388e-01
   2.2757357e+01  -2.8981415e+01   2.5000000e+02  -4.9552116e+00   3.2359845e+00  -1.1327289e-01
   2.2903704e+01  -2.8971761e+01   2.5000000e+02  -4.7709273e+00   3.5882911e+00   4.0812925e-01
   2.3049584e+01  -2.8957841e+01   2.5000000e+02  -4.5906274e+00   3.8801234e+00   9.7091849e-01
   2.3194830e+01  -2.8939670e+01   2.5000000e+02  -4.4192057e+00   4.1048454e+00   1.5607948e+00
   2.3339274e+01  -2.8917268e+01   2.5000000e+02  -4.2607442e+00   4.2593586e+00   2.1622004e+00
   2.4096253e+01  -2.8862791e+01   2.5000000e+02  -3.3913564e+00   3.8466243e+00   5.1912255e+00
   2.4232789e+01  -2.8815636e+01   2.5000000e+02  -3.3277145e+00   3.6678738e+00   5.5803533e+00
   2.4367451e+01  -2.8764641e+01   2.5000000e+02  -3.2818376e+00   3.4677990e+00   5.9162412e+00
   2.4500096e+01  -2.8709861e+01   2.5000000e+02  -3.2521797e+00   3.2547758e+00   6.1993737e+00
   2.4630585e+01  -2.8651355e+01   2.5000000e+02  -3.2372522e+00   3.0359753e+00   6.4318128e+00
   2.4758781e+01  -2.8589188e+01   2.5000000e+02  -3.2357066e+00   2.8172401e+00   6.6166554e+00
   2.4884551e+01  -2.8523425e+01   2.5000000e+02  -3.2463767e+00   2.6031201e+00   6.7575362e+00
   2.5007765e+01  -2.8454138e+01   2.5000000e+02  -3.2682520e+00   2.3970132e+00   6.8582234e+00
   2.5128297e+01  -2.8381402e+01   2.5000000e+02  -3.3004503e+00   2.2013903e+00   6.9223167e+00
   2.5246025e+01  -2.8305293e+01   2.5000000e+02  -3.3421754e+00   2.0180500e+00   6.9530593e+00
   2.5360828e+01  -2.8225895e+01   2.5000000e+02  -3.3926580e+00   1.8483598e+00   6.9532706e+00
   2.5472593e+01  -2.8143290e+01   2.5000000e+02  -3.4511383e+00   1.6934597e+00   6.9253612e+00
   2.5581209e+01  -2.8057568e+01   2.5000000e+02  -3.5168405e+00   1.5544067e+00   6.8714345e+00
   2.5686569e+01  -2.7968819e+01   2.5000000e+02  -3.5890150e+00   1.4322450e+00   6.7934121e+00
   2.5788570e+01  -2.7877136e+01   2.5000000e+02  -3.6669912e+00   1.3279788e+00   6.6931706e+00
   2.5887114e+01  -2.7782618e+01   2.5000000e+02  -3.7502543e+00   1.2424653e+00   6.5726334e+00
   2.5982109e+01  -2.7685362e+01   2.5000000e+02  -3.8385488e+00   1.1762730e+00   6.4337617e+00
   2.6073464e+01  -2.7585471e+01   2.5000000e+02  -3.9319198e+00   1.1295153e+00   6.2784724e+00
   2.6161095e+01  -2.7483050e+01   2.5000000e+02  -4.0306984e+00   1.1017092e+00   6.1084560e+00
   2.6244923e+01  -2.7378205e+01   2.5000000e+02  -4.1353978e+00   1.0917150e+00   5.9249540e+00
   2.6324871e+01  -2.7271044e+01   2.5000000e+02  -4.2465106e+00   1.0977641e+00   5.7285641e+00
   2.6400870e+01  -2.7161679e+01   2.5000000e+02  -4.3642225e+00   1.1175574e+00   5.5191386e+00
   2.6472853e+01  -2.7050223e+01   2.5000000e+02  -4.4881335e+00   1.1484628e+00   5.2958099e+00
   2.6540758e+01  -2.6936789e+01   2.5000000e+02  -4.6170107e+00   1.1877248e+00   5.0571789e+00
   2.6604530e+01  -2.6821495e+01   2.5000000e+02  -4.7486457e+00   1.2326625e+00   4.8016532e+00
   2.6664117e+01  -2.6704458e+01   2.5000000e+02  -4.8798966e+00   1.2808502e+00   4.5278276e+00
   2.6719472e+01  -2.6585797e+01   2.5000000e+02  -5.0068731e+00   1.3302159e+00   4.2348800e+00
   2.6770551e+01  -2.6465632e+01   2.5000000e+02  -5.1252689e+00   1.3790881e+00   3.9228639e+00
   2.6817318e+01  -2.6344085e+01   2.5000000e+02  -5.2307615e+00   1.4261829e+00   3.5928682e+00
   2.6859740e+01  -2.6221278e+01   2.5000000e+02  -5.3194247e+00   1.4705745e+00   3.2469981e+00
   2.6897788e+01  -2.6097334e+01   2.5000000e+02  -5.3880691e+00   1.5116445e+00   2.8882295e+00
   2.6931439e+01  -2.5972378e+01   2.5000000e+02  -5.4344764e+00   1.5490303e+00   2.5201748e+00
   2.6960673e+01  -2.5846533e+01   2.5000000e+02  -5.4575243e+00   1.5825842e+00   2.1467891e+00
   2.6985477e+01  -2.5719925e+01   2.5000000e+02  -5.4571994e+00   1.6123223e+00   1.7721190e+00
   2.7005839e+01  -2.5592680e+01   2.5000000e+02  -5.4345450e+00   1.6383806e+00   1.4000389e+00
   2.7021754e+01  -2.5464922e+01   2.5000000e+02  -5.3915488e+00   1.6609532e+00   1.0340324e+00
   2.7033221e+01  -2.5336777e+01   2.5000000e+02  -5.3309975e+00   1.6802271e+00   6.7699498e-01
   2.7040243e+01  -2.5208372e+01   2.5000000e+02  -5.2562876e+00   1.6963079e+00   3.3103379e-01
   2.7042827e+01  -2.5079831e+01   2.5000000e+02  -5.1711785e+00   1.7091398e+00  -2.7238600e-03
   2.7040984e+01  -2.4951279e+01   2.5000000e+02  -5.0794877e+00   1.7184180e+00  -3.2425324e-01
   2.7034731e+01  -2.4822841e+01   2.5000000e+02  -4.9847303e+00   1.7235016e+00  -6.3468075e-01
   2.7024088e+01  -2.4694643e+01   2.5000000e+02  -4.8897358e+00   1.7233335e+00  -9.3620706e-01
   2.7009076e+01  -2.4566806e+01   2.5000000e+02  -4.7962839e+00   1.7163808e+00  -1.2318918e+00
   2.6989726e+01  -2.4439455e+01   2.5000000e+02  -4.7048390e+00   1.7006159e+00  -1.5252363e+00
   2.6966067e+01  -2.4312712e+01   2.5000000e+02  -4.6144184e+00   1.6735602e+00  -1.8197143e+00
   2.6938135e+01  -2.4186697e+01   2.5000000e+02  -4.5226597e+00   1.6324027e+00  -2.1181971e+00
   2.6905970e+01  -2.4061531e+01   2.5000000e+02  -4.4260994e+00   1.5741957e+00  -2.4224254e+00
   2.6869613e+01  -2.3937333e+01   2.5000000e+02  -4.3206374e+00   1.4961058e+00  -2.7326234e+00
   2.6829112e+01  -2.3814220e+01   2.5000000e+02  -4.2021361e+00   1.3956872e+00  -3.0473047e+00
   2.6784515e+01  -2.3692310e+01   2.5000000e+02  -4.0670463e+00   1.2711286e+00  -3.3633624e+00
   2.6735876e+01  -2.3571717e+01   2.5000000e+02  -3.9129440e+00   1.1214222e+00  -3.6764110e+00
   2.6683251e+01  -2.3452554e+01   2.5000000e+02  -3.7388688e+00   9.4642945e-01  -3.9813276e+00
   2.6626700e+01  -2.3334934e+01   2.5000000e+02  -3.5453980e+00   7.4683101e-01  -4.2728624e+00
   2.6566286e+01  -2.3218967e+01   2.5000000e+02  -3.3344435e+00   5.2397395e-01  -4.5462022e+00
   2.6502074e+01  -2.3104761e+01   2.5000000e+02  -3.1088417e+00   2.7966667e-01  -4.7973444e+00
   2.6434133e+01  -2.2992422e+01   2.5000000e+02  -2.8718528e+00   1.5973254e-02  -5.0232233e+00
   2.6362536e+01  -2.2882056e+01   2.5000000e+02  -2.6266887e+00  -2.6494247e-01  -5.2215985e+00
   2.6287357e+01  -2.2773764e+01   2.5000000e+02  -2.3761661e+00  -5.6091064e-01  -5.3907851e+00
   2.6208673e+01  -2.2667647e+01   2.5000000e+02  -2.1225697e+00  -8.6973997e-01  -5.5293061e+00
   2.6126565e+01  -2.2563803e+01   2.5000000e+02  -1.8676978e+00  -1.1891484e+00  -5.6356098e+00
   2.6041115e+01  -2.2462328e+01   2.5000000e+02  -1.6130446e+00  -1.5166564e+00  -5.7079190e+00
   2.5952409e+01  -2.2363316e+01   2.5000000e+02  -1.3600569e+00  -1.8494793e+00  -5.7442471e+00
   2.5860534e+01  -2.2266857e+01   2.5000000e+02  -1.1103667e+00  -2.1844696e+00  -5.7425688e+00
   2.5765580e+01  -2.2173041e+01   2.5000000e+02  -8.6597063e-01  -2.5180958e+00  -5.7010902e+00
   2.5667641e+01  -2.2081952e+01   2.5000000e+02  -6.2930551e-01  -2.8465047e+00  -5.6185631e+00
   2.5566809e+01  -2.1993676e+01   2.5000000e+02  -4.0323081e-01  -3.1656190e+00  -5.4945744e+00
   2.5463183e+01  -2.1908291e+01   2.5000000e+02  -1.9095215e-01  -3.4712897e+00  -5.3297956e+00
   2.5356861e+01  -2.1825877e+01   2.5000000e+02   4.1209583e-03  -3.7594735e+00  -5.1261472e+00
   2.5247944e+01  -2.1746508e+01   2.5000000e+02   1.7853598e-01  -4.0264559e+00  -4.8868914e+00
   2.5136533e+01  -2.1670257e+01   2.5000000e+02   3.2897848e-01  -4.2690949e+00  -4.6166346e+00
   2.5022735e+01  -2.1597193e+01   2.5000000e+02   4.5245506e-01  -4.4850894e+00  -4.3212413e+00
   2.4906654e+01  -2.1527383e+01   2.5000000e+02   5.4649455e-01  -4.6732668e+00  -4.0076073e+00
   2.4788398e+01  -2.1460889e+01   2.5000000e+02   6.0932186e-01  -4.8338242e+00  -3.6833273e+00
   2.4668077e+01  -2.1397772e+01   2.5000000e+02   6.4001614e-01  -4.9684972e+00  -3.3562264e+00
   2.4545802e+01  -2.1338090e+01   2.5000000e+02   6.3861804e-01  -5.0806054e+00  -3.0337873e+00
   2.4421685e+01  -2.1281896e+01   2.5000000e+02   6.0616548e-01  -5.1749281e+00  -2.7225396e+00
   2.4295839e+01  -2.1229241e+01   2.5000000e+02   5.4465184e-01  -5.2574037e+00  -2.4274918e+00
   2.4168379e+01  -2.1180172e+01   2.5000000e+02   4.5690445e-01  -5.3346785e+00  -2.1516795e+00
   2.4039421e+01  -2.1134735e+01   2.5000000e+02   3.4640465e-01  -5.4135595e+00  -1.8958995e+00
   2.3909081e+01  -2.1092970e+01   2.5000000e+02   2.1706389e-01  -5.5004420e+00  -1.6586572e+00
   2.3777478e+01  -2.1054914e+01   2.5000000e+02   7.3003986e-02  -5.6007892e+00  -1.4363416e+00
   2.3644730e+01  -2.1020603e+01   2.5000000e+02  -8.1645485e-02  -5.7187293e+00  -1.2235580e+00
   2.3510958e+01  -2.0990066e+01   2.5000000e+02  -2.4291593e-01  -5.8567803e+00  -1.0135859e+00
   2.3376280e+01  -2.0963332e+01   2.5000000e+02  -4.0711490e-01  -6.0157392e+00  -7.9887123e-01
   2.3240818e+01  -2.0940424e+01   2.5000000e+02  -5.7090232e-01  -6.1946663e+00  -5.7153731e-01
   2.3104694e+01  -2.0921363e+01   2.5000000e+02  -7.3132697e-01  -6.3909859e+00  -3.2384263e-01
   2.2968029e+01  -2.0906167e+01   2.5000000e+02  -8.8583842e-01  -6.6006430e+00  -4.8592553e-02
   2.2830946e+01  -2.0894848e+01   2.5000000e+02  -1.0322757e+00  -6.8182956e+00   2.6049160e-01
   2.2693567e+01  -2.0887418e+01   2.5000000e+02  -1.1688325e+00  -7.0375574e+00   6.0848085e-01
   2.2556015e+01  -2.0883882e+01   2.5000000e+02  -1.2940203e+00  -7.2512431e+00   9.9897781e-01
   2.2418413e+01  -2.0884244e+01   2.5000000e+02  -1.4066076e+00  -7.4516523e+00   1.4339367e+00
   2.2280884e+01  -2.0888504e+01   2.5000000e+02  -1.5055650e+00  -7.6308579e+00   1.9135298e+00
   2.2143550e+01  -2.0896658e+01   2.5000000e+02  -1.5900102e+00  -7.7810135e+00   2.4360810e+00
   2.2006536e+01  -2.0908698e+01   2.5000000e+02  -1.6591596e+00  -7.8946687e+00   2.9980435e+00
   2.1869962e+01  -2.0924614e+01   2.5000000e+02  -1.7123027e+00  -7.9651133e+00   3.5940938e+00
   2.1733952e+01  -2.0944391e+01   2.5000000e+02  -1.7487890e+00  -7.9867139e+00   4.2172290e+00
   2.1598626e+01  -2.0968012e+01   2.5000000e+02  -1.7680326e+00  -7.9552649e+00   4.8590356e+00
   2.1464108e+01  -2.0995455e+01   2.5000000e+02  -1.7695240e+00  -7.8683019e+00   5.5099859e+00
   2.1330516e+01  -2.1026695e+01   2.5000000e+02  -1.7528389e+00  -7.7253407e+00   6.1599258e+00
   2.1197972e+01  -2.1061705e+01   2.5000000e+02  -1.7176289e+00  -7.5280049e+00   6.7985579e+00
   2.1066595e+01  -2.1100453e+01   2.5000000e+02  -1.6636103e+00  -7.2799784e+00   7.4160257e+00
   2.0936503e+01  -2.1142903e+01   2.5000000e+02  -1.5905318e+00  -6.9867845e+00   8.0034405e+00
   2.0807815e+01  -2.1189019e+01   2.5000000e+02  -1.4981347e+00  -6.6554018e+00   8.5533185e+00
   2.0680646e+01  -2.1238757e+01   2.5000000e+02  -1.3861526e+00  -6.2937390e+00   9.0598658e+00
   2.0555112e+01  -2.1292074e+01   2.5000000e+02  -1.2543021e+00  -5.9100853e+00   9.5190771e+00
   2.0431329e+01  -2.1348920e+01   2.5000000e+02  -1.1023463e+00  -5.5125729e+00   9.9286485e+00
   2.0309409e+01  -2.1409245e+01   2.5000000e+02  -9.3015708e-01  -5.1087231e+00   1.0287780e+01
   2.0189464e+01  -2.1472994e+01   2.5000000e+02  -7.3782534e-01  -4.7051577e+00   1.0596852e+01
   2.0071604e+01  -2.1540108e+01   2.5000000e+02  -5.2575810e-01  -4.3074437e+00   1.0857102e+01
   1.9955939e+01  -2.1610529e+01   2.5000000e+02  -2.9474111e-01  -3.9200861e+00   1.1070328e+01
   1.9842576e+01  -2.1684190e+01   2.5000000e+02  -4.6008053e-02  -3.5466067e+00   1.1238628e+01
   1.9731622e+01  -2.1761026e+01   2.5000000e+02   2.1879547e-01  -3.1896966e+00   1.1364238e+01
   1.9623179e+01  -2.1840966e+01   2.5000000e+02   4.9763146e-01  -2.8513649e+00   1.1449398e+01
   1.9517350e+01  -2.1923938e+01   2.5000000e+02   7.8815353e-01  -2.5331073e+00   1.1496285e+01
   1.9414236e+01  -2.2009866e+01   2.5000000e+02   1.0877780e+00  -2.2360209e+00   1.1506968e+01
   1.9313935e+01  -2.2098672e+01   2.5000000e+02   1.3937665e+00  -1.9608912e+00   1.1483387e+01
   1.9216543e+01  -2.2190274e+01   2.5000000e+02   1.7032815e+00  -1.7082533e+00   1.1427344e+01
   1.9122155e+01  -2.2284588e+01   2.5000000e+02   2.0134395e+00  -1.4784265e+00   1.1340514e+01
   1.9030862e+01  -2.2381528e+01   2.5000000e+02   2.3213422e+00  -1.2715207e+00   1.1224451e+01
   1.8942755e+01  -2.2481005e+01   2.5000000e+02   2.6240956e+00  -1.0874515e+00   1.1080621e+01
   1.8857919e+01  -2.2582927e+01   2.5000000e+02   2.9188279e+00  -9.2593070e-01   1.0910418e+01
   1.8776441e+01  -2.2687201e+01   2.5000000e+02   3.2027161e+00  -7.8650023e-01   1.0715210e+01
   1.8698403e+01  -2.2793729e+01   2.5000000e+02   3.4729993e+00  -6.6854098e-01   1.0496376e+01
   1.8623884e+01  -2.2902414e+01   2.5000000e+02   3.7270337e+00  -5.7132214e-01   1.0255344e+01
   1.8552961e+01  -2.3013155e+01   2.5000000e+02   3.9623322e+00  -4.9405097e-01   9.9936497e+00
   1.8485708e+01  -2.3125849e+01   2.5000000e+02   4.1766411e+00  -4.3592062e-01   9.7129763e+00
   1.8422197e+01  -2.3240390e+01   2.5000000e+02   4.3680245e+00  -3.9614915e-01   9.4151876e+00
   1.8362495e+01  -2.3356673e+01   2.5000000e+02   4.5349581e+00  -3.7399360e-01   9.1023129e+00
   1.8306669e+01  -2.3474588e+01   2.5000000e+02   4.6763943e+00  -3.6874941e-01   8.7765200e+00
   1.8254781e+01  -2.3594025e+01   2.5000000e+02   4.7918041e+00  -3.7971544e-01   8.4400136e+00
   1.8206889e+01  -2.3714872e+01   2.5000000e+02   4.8811531e+00  -4.0615393e-01   8.0949216e+00
   1.8163049e+01  -2.3837014e+01   2.5000000e+02   4.9448155e+00  -4.4725461e-01   7.7431723e+00
   1.8123314e+01  -2.3960337e+01   2.5000000e+02   4.9834263e+00  -5.0211033e-01   7.3863799e+00
   1.8087733e+01  -2.4084724e+01   2.5000000e+02   4.9976829e+00  -5.6970255e-01   7.0258117e+00
   1.8056352e+01  -2.4210057e+01   2.5000000e+02   4.9881496e+00  -6.4892365e-01   6.6624167e+00
   1.8029211e+01  -2.4336217e+01   2.5000000e+02   4.9550919e+00  -7.3860320e-01   6.2969458e+00
   1.8006351e+01  -2.4463082e+01   2.5000000e+02   4.8984011e+00  -8.3757114e-01   5.9301401e+00
   1.7987804e+01  -2.4590533e+01   2.5000000e+02   4.8175977e+00  -9.4467543e-01   5.5629324e+00
   1.7973603e+01  -2.4718446e+01   2.5000000e+02   4.7119691e+00  -1.0588288e+00   5.1966650e+00
   1.7963774e+01  -2.4846698e+01   2.5000000e+02   4.5807680e+00  -1.1789961e+00   4.8332110e+00
   1.7958339e+01  -2.4975166e+01   2.5000000e+02   4.4234720e+00  -1.3041861e+00   4.4750171e+00
   1.7957318e+01  -2.5103725e+01   2.5000000e+02   4.2400454e+00  -1.4334253e+00   4.1250410e+00
   1.7960726e+01  -2.5232251e+01   2.5000000e+02   4.0311460e+00  -1.5657183e+00   3.7865825e+00
   1.7968574e+01  -2.5360618e+01   2.5000000e+02   3.7982709e+00  -1.7000242e+00   3.4630578e+00
   1.7980868e+01  -2.5488700e+01   2.5000000e+02   3.5438047e+00  -1.8352517e+00   3.1577230e+00
   1.7997609e+01  -2.5616372e+01   2.5000000e+02   3.2709786e+00  -1.9702799e+00   2.8733934e+00
   1.8018797e+01  -2.5743509e+01   2.5000000e+02   2.9837523e+00  -2.1040120e+00   2.6121811e+00
   1.8044425e+01  -2.5869984e+01   2.5000000e+02   2.6866207e+00  -2.2354082e+00   2.3752836e+00
   1.8074481e+01  -2.5995673e+01   2.5000000e+02   2.3843459e+00  -2.3635466e+00   2.1628100e+00
   1.8108951e+01  -2.6120450e+01   2.5000000e+02   2.0816633e+00  -2.4876691e+00   1.9736955e+00
   1.8147814e+01  -2.6244192e+01   2.5000000e+02   1.7829332e+00  -2.6071784e+00   1.8057064e+00
   1.8191046e+01  -2.6366774e+01   2.5000000e+02   1.4918178e+00  -2.7216341e+00   1.6555461e+00
   1.8238617e+01  -2.6488074e+01   2.5000000e+02   1.2109690e+00  -2.8306984e+00   1.5190682e+00
   1.8290494e+01  -2.6607968e+01   2.5000000e+02   9.4181103e-01  -2.9340802e+00   1.3915782e+00
   1.8346639e+01  -2.6726337e+01   2.5000000e+02   6.8440260e-01  -3.0314489e+00   1.2682057e+00
   1.8407007e+01  -2.6843059e+01   2.5000000e+02   4.3745814e-01  -3.1223550e+00   1.1443118e+00
   1.8471551e+01  -2.6958016e+01   2.5000000e+02   1.9846509e-01  -3.2061756e+00   1.0158692e+00
   1.8540219e+01  -2.7071091e+01   2.5000000e+02  -3.6055186e-02  -3.2820655e+00   8.7981264e-01
   1.8612953e+01  -2.7182167e+01   2.5000000e+02  -2.7019655e-01  -3.3489501e+00   7.3430356e-01
   1.8689691e+01  -2.7291131e+01   2.5000000e+02  -5.0826613e-01  -3.4055650e+00   5.7888684e-01
   1.8770366e+01  -2.7397869e+01   2.5000000e+02  -7.5434339e-01  -3.4505429e+00   4.1453319e-01
   1.8854906e+01  -2.7502272e+01   2.5000000e+02  -1.0118732e+00  -3.4825359e+00   2.4355319e-01
   1.8943236e+01  -2.7604231e+01   2.5000000e+02  -1.2832997e+00  -3.5003832e+00   6.9377750e-02
   1.9035274e+01  -2.7703640e+01   2.5000000e+02  -1.5697940e+00  -3.5032659e+00  -1.0376614e-01
   1.9130935e+01  -2.7800395e+01   2.5000000e+02  -1.8711049e+00  -3.4908583e+00  -2.7129546e-01
   1.9230129e+01  -2.7894394e+01   2.5000000e+02  -2.1855413e+00  -3.4634098e+00  -4.2875794e-01
   1.9332762e+01  -2.7985538e+01   2.5000000e+02  -2.5101061e+00  -3.4217452e+00  -5.7233177e-01
   1.9438735e+01  -2.8073732e+01   2.5000000e+02  -2.8407588e+00  -3.3671587e+00  -6.9926223e-01
   1.9547944e+01  -2.8158881e+01   2.5000000e+02  -3.1727719e+00  -3.3012196e+00  -8.0818422e-01
   1.9660282e+01  -2.8240897e+01   2.5000000e+02  -3.5011597e+00  -3.2254837e+00  -8.9925699e-01
   1.9775638e+01  -2.8319690e+01   2.5000000e+02  -3.8210656e+00  -3.1411986e+00  -9.7411003e-01
   1.9893896e+01  -2.8395178e+01   2.5000000e+02  -4.1281132e+00  -3.0489988e+00  -1.0355546e+00
   2.0014936e+01  -2.8467279e+01   2.5000000e+02  -4.4186165e+00  -2.9487142e+00  -1.0871752e+00
   2.0138635e+01  -2.8535917e+01   2.5000000e+02  -4.6896762e+00  -2.8392705e+00  -1.1328024e+00
   2.0264866e+01  -2.8601016e+01   2.5000000e+02  -4.9391241e+00  -2.7187435e+00  -1.1760096e+00
   2.0393498e+01  -2.8662508e+01   2.5000000e+02  -5.1653892e+00  -2.5845105e+00  -1.2196444e+00
   2.0524398e+01  -2.8720326e+01   2.5000000e+02  -5.3672934e+00  -2.4335039e+00  -1.2655383e+00
   2.0657429e+01  -2.8774407e+01   2.5000000e+02  -5.5438539e+00  -2.2624778e+00  -1.3143202e+00
   2.0792450e+01  -2.8824692e+01   2.5000000e+02  -5.6941255e+00  -2.0682584e+00  -1.3653689e+00
   2.0929318e+01  -2.8871127e+01   2.5000000e+02  -5.8171112e+00  -1.8479381e+00  -1.4168434e+00
   2.1067889e+01  -2.8913662e+01   2.5000000e+02  -5.9117451e+00  -1.5990150e+00  -1.4657450e+00
   2.1208013e+01  -2.8952250e+01   2.5000000e+02  -5.9769410e+00  -1.3195140e+00  -1.5079522e+00
   2.1349541e+01  -2.8986849e+01   2.5000000e+02  -6.0117006e+00  -1.0081041e+00  -1.5382335e+00
   2.1492320e+01  -2.9017421e+01   2.5000000e+02  -6.0152475e+00  -6.6430543e-01  -1.5502491e+00
   2.1636196e+01  -2.9043932e+01   2.5000000e+02  -5.9871802e+00  -2.8877776e-01  -1.5366169e+00
   2.1781013e+01  -2.9066355e+01   2.5000000e+02  -5.9276294e+00   1.1629753e-01  -1.4890977e+00
   2.1926614e+01  -2.9084663e+01   2.5000000e+02  -5.8374053e+00   5.4682033e-01  -1.3990320e+00
   2.2072840e+01  -2.9098837e+01   2.5000000e+02  -5.7181320e+00   9.9644257e-01  -1.2579501e+00
   2.2219533e+01  -2.9108862e+01   2.5000000e+02  -5.5723432e+00   1.4564569e+00  -1.0584360e+00
   2.2366531e+01  -2.9114726e+01   2.5000000e+02  -5.4035317e+00   1.9159639e+00  -7.9508487e-01
   2.2513676e+01  -2.9116423e+01   2.5000000e+02  -5.2161071e+00   2.3624253e+00  -4.6537833e-01
   2.2660805e+01  -2.9113951e+01   2.5000000e+02  -5.0152750e+00   2.7824899e+00  -7.0379199e-02
   2.2807759e+01  -2.9107313e+01   2.5000000e+02  -4.8067913e+00   3.1630852e+00   3.8498505e-01
   2.2954377e+01  -2.9096516e+01   2.5000000e+02  -4.5966491e+00   3.4925188e+00   8.9204271e-01
   2.3100500e+01  -2.9081572e+01   2.5000000e+02  -4.3906987e+00   3.7614849e+00   1.4389623e+00
   2.3245967e+01  -2.9062498e+01   2.5000000e+02  -4.1942786e+00   3.9637881e+00   2.0116507e+00
   2.3390621e+01  -2.9039314e+01   2.5000000e+02  -4.0118876e+00   4.0967346e+00   2.5948885e+00
   2.3534304e+01  -2.9012045e+01   2.5000000e+02  -3.8469658e+00   4.1611259e+00   3.1734741e+00
   2.3676862e+01  -2.8980722e+01   2.5000000e+02  -3.7017854e+00   4.1609281e+00   3.7333024e+00
   2.3818141e+01  -2.8945379e+01   2.5000000e+02  -3.5774891e+00   4.1026875e+00   4.2621920e+00
   2.3957988e+01  -2.8906054e+01   2.5000000e+02  -3.4742255e+00   3.9947844e+00   4.7504638e+00
   2.4700234e+01  -2.8764147e+01   2.5000000e+02  -2.8607652e+00   2.7104441e+00   6.6788741e+00
   2.4828699e+01  -2.8701863e+01   2.5000000e+02  -2.8569784e+00   2.4870862e+00   6.8476082e+00
   2.4954798e+01  -2.8636081e+01   2.5000000e+02  -2.8666429e+00   2.2695109e+00   6.9749534e+00
   2.5078409e+01  -2.8566866e+01   2.5000000e+02  -2.8885635e+00   2.0608143e+00   7.0646798e+00
   2.5199411e+01  -2.8494290e+01   2.5000000e+02  -2.9216532e+00   1.8632052e+00   7.1203333e+00
   2.5317689e+01  -2.8418426e+01   2.5000000e+02  -2.9649053e+00   1.6782637e+00   7.1450683e+00
   2.5433129e+01  -2.8339351e+01   2.5000000e+02  -3.0173573e+00   1.5072039e+00   7.1415863e+00
   2.5545622e+01  -2.8257145e+01   2.5000000e+02  -3.0780651e+00   1.3510790e+00   7.1121732e+00
   2.5655063e+01  -2.8171890e+01   2.5000000e+02  -3.1461036e+00   1.2109361e+00   7.0588035e+00
   2.5761351e+01  -2.8083672e+01   2.5000000e+02  -3.2205900e+00   1.0878823e+00   6.9832903e+00
   2.5864388e+01  -2.7992580e+01   2.5000000e+02  -3.3007498e+00   9.8306759e-01   6.8874338e+00
   2.5964080e+01  -2.7898703e+01   2.5000000e+02  -3.3860133e+00   8.9758056e-01   6.7731249e+00
   2.6060338e+01  -2.7802136e+01   2.5000000e+02  -3.4760994e+00   8.3226960e-01   6.6423775e+00
   2.6153076e+01  -2.7702974e+01   2.5000000e+02  -3.5711068e+00   7.8756289e-01   6.4972391e+00
   2.6242214e+01  -2.7601315e+01   2.5000000e+02  -3.6715175e+00   7.6328516e-01   6.3396136e+00
   2.6327675e+01  -2.7497260e+01   2.5000000e+02  -3.7781224e+00   7.5855472e-01   6.1710152e+00
   2.6409385e+01  -2.7390910e+01   2.5000000e+02  -3.8918466e+00   7.7177069e-01   5.9923117e+00
   2.6487277e+01  -2.7282370e+01   2.5000000e+02  -4.0134616e+00   8.0068363e-01   5.8035468e+00
   2.6561286e+01  -2.7171746e+01   2.5000000e+02  -4.1432760e+00   8.4257988e-01   5.6038776e+00
   2.6631354e+01  -2.7059144e+01   2.5000000e+02  -4.2808200e+00   8.9449905e-01   5.3916835e+00
   2.6697424e+01  -2.6944675e+01   2.5000000e+02  -4.4246150e+00   9.5347275e-01   5.1648484e+00
   2.6759446e+01  -2.6828448e+01   2.5000000e+02  -4.5720938e+00   1.0167328e+00   4.9211430e+00
   2.6817373e+01  -2.6710576e+01   2.5000000e+02  -4.7196808e+00   1.0818590e+00   4.6586773e+00
   2.6871163e+01  -2.6591172e+01   2.5000000e+02  -4.8630520e+00   1.1468628e+00   4.3762910e+00
   2.6920779e+01  -2.6470349e+01   2.5000000e+02  -4.9975123e+00   1.2102049e+00   4.0738357e+00
   2.6966186e+01  -2.6348224e+01   2.5000000e+02  -5.1184239e+00   1.2707687e+00   3.7523057e+00
   2.7007356e+01  -2.6224910e+01   2.5000000e+02  -5.2216265e+00   1.3278106e+00   3.4137784e+00
   2.7044263e+01  -2.6100527e+01   2.5000000e+02  -5.3037627e+00   1.3808981e+00   3.0612710e+00
   2.7076887e+01  -2.5975189e+01   2.5000000e+02  -5.3625111e+00   1.4298567e+00   2.6984538e+00
   2.7105211e+01  -2.5849016e+01   2.5000000e+02  -5.3966868e+00   1.4747061e+00   2.3294065e+00
   2.7129222e+01  -2.5722126e+01   2.5000000e+02  -5.4062583e+00   1.5156044e+00   1.9583261e+00
   2.7148913e+01  -2.5594636e+01   2.5000000e+02  -5.3922883e+00   1.5527808e+00   1.5892891e+00
   2.7164279e+01  -2.5466666e+01   2.5000000e+02  -5.3568316e+00   1.5864682e+00   1.2260381e+00
   2.7175320e+01  -2.5338334e+01   2.5000000e+02  -5.3027961e+00   1.6168346e+00   8.7175618e-01
   2.7182040e+01  -2.5209758e+01   2.5000000e+02  -5.2337618e+00   1.6439173e+00   5.2886169e-01
   2.7184445e+01  -2.5081057e+01   2.5000000e+02  -5.1537491e+00   1.6675603e+00   1.9880695e-01
   2.7182549e+01  -2.4952349e+01   2.5000000e+02  -5.0669200e+00   1.6873527e+00  -1.1808271e-01
   2.7176365e+01  -2.4823752e+01   2.5000000e+02  -4.9772234e+00   1.7025699e+00  -4.2270658e-01
   2.7165913e+01  -2.4695383e+01   2.5000000e+02  -4.8880015e+00   1.7121137e+00  -7.1714784e-01
   2.7151215e+01  -2.4567359e+01   2.5000000e+02  -4.8016061e+00   1.7144665e+00  -1.0044976e+00
   2.7132298e+01  -2.4439796e+01   2.5000000e+02  -4.7190768e+00   1.7076744e+00  -1.2885116e+00
   2.7109191e+01  -2.4312809e+01   2.5000000e+02  -4.6399456e+00   1.6893798e+00  -1.5731348e+00
   2.7081927e+01  -2.4186513e+01   2.5000000e+02  -4.5622222e+00   1.6569211e+00  -1.8619264e+00
   2.7050544e+01  -2.4061021e+01   2.5000000e+02  -4.4825923e+00   1.6075042e+00  -2.1574855e+00
   2.7015080e+01  -2.3936446e+01   2.5000000e+02  -4.3968295e+00   1.5384338e+00  -2.4609710e+00
   2.6975579e+01  -2.3812898e+01   2.5000000e+02  -4.3003772e+00   1.4473729e+00  -2.7718020e+00
   2.6932088e+01  -2.3690489e+01   2.5000000e+02  -4.1890113e+00   1.3325897e+00  -3.0876247e+00
   2.6884655e+01  -2.3569327e+01   2.5000000e+02  -4.0594530e+00   1.1931322e+00  -3.4045838e+00
   2.6833334e+01  -2.3449519e+01   2.5000000e+02  -3.9098261e+00   1.0289093e+00  -3.7178040e+00
   2.6778179e+01  -2.3331172e+01   2.5000000e+02  -3.7398436e+00   8.4064835e-01  -4.0220307e+00
   2.6719250e+01  -2.3214390e+01   2.5000000e+02  -3.5507109e+00   6.2974666e-01  -4.3122425e+00
   2.6656606e+01  -2.3099276e+01   2.5000000e+02  -3.3447674e+00   3.9805177e-01  -4.5841286e+00
   2.6590313e+01  -2.2985930e+01   2.5000000e+02  -3.1249968e+00   1.4762960e-01  -4.8343034e+00
   2.6520437e+01  -2.2874454e+01   2.5000000e+02  -2.8945074e+00  -1.1942781e-01  -5.0602688e+00
   2.6447046e+01  -2.2764942e+01   2.5000000e+02  -2.6561165e+00  -4.0113586e-01  -5.2601693e+00
   2.6370214e+01  -2.2657493e+01   2.5000000e+02  -2.4121489e+00  -6.9560824e-01  -5.4324093e+00
   2.6290014e+01  -2.2552199e+01   2.5000000e+02  -2.1643957e+00  -1.0010153e+00  -5.5753268e+00
   2.6206523e+01  -2.2449151e+01   2.5000000e+02  -1.9142815e+00  -1.3154363e+00  -5.6869510e+00
   2.6119820e+01  -2.2348440e+01   2.5000000e+02  -1.6631111e+00  -1.6367103e+00  -5.7649497e+00
   2.6029986e+01  -2.2250152e+01   2.5000000e+02  -1.4123274e+00  -1.9623196e+00  -5.8067568e+00
   2.5937105e+01  -2.2154373e+01   2.5000000e+02  -1.1637274e+00  -2.2893069e+00  -5.8098296e+00
   2.5841262e+01  -2.2061186e+01   2.5000000e+02  -9.1957256e-01  -2.6142786e+00  -5.7719818e+00
   2.5742546e+01  -2.1970670e+01   2.5000000e+02  -6.8261092e-01  -2.9334628e+00  -5.6917197e+00
   2.5641045e+01  -2.1882904e+01   2.5000000e+02  -4.5600589e-01  -3.2428220e+00  -5.5685277e+00
   2.5536852e+01  -2.1797963e+01   2.5000000e+02  -2.4322258e-01  -3.5382043e+00  -5.4030944e+00
   2.5430060e+01  -2.1715921e+01   2.5000000e+02  -4.7869918e-02  -3.8155303e+00  -5.1974511e+00
   2.5320763e+01  -2.1636847e+01   2.5000000e+02   1.2646484e-01  -4.0710133e+00  -4.9550412e+00
   2.5209060e+01  -2.1560809e+01   2.5000000e+02   2.7638213e-01  -4.3013955e+00  -4.6807224e+00
   2.5095048e+01  -2.1487873e+01   2.5000000e+02   3.9885942e-01  -4.5042366e+00  -4.3806593e+00
   2.4978827e+01  -2.1418100e+01   2.5000000e+02   4.9142840e-01  -4.6781993e+00  -4.0621256e+00
   2.4860499e+01  -2.1351551e+01   2.5000000e+02   5.5235275e-01  -4.8233136e+00  -3.7331730e+00
   2.4740167e+01  -2.1288282e+01   2.5000000e+02   5.8078183e-01  -4.9411793e+00  -3.4021585e+00
   2.4617936e+01  -2.1228348e+01   2.5000000e+02   5.7685451e-01  -5.0350375e+00  -3.0771747e+00
   2.4493910e+01  -2.1171798e+01   2.5000000e+02   5.4173146e-01  -5.1096830e+00  -2.7654080e+00
   2.4368197e+01  -2.1118682e+01   2.5000000e+02   4.7754739e-01  -5.1711901e+00  -2.4725487e+00
   2.4240904e+01  -2.1069044e+01   2.5000000e+02   3.8727481e-01  -5.2264815e+00  -2.2022746e+00
   2.4112140e+01  -2.1022927e+01   2.5000000e+02   2.7452792e-01  -5.2827807e+00  -1.9559440e+00
   2.3982015e+01  -2.0980369e+01   2.5000000e+02   1.4332216e-01  -5.3470246e+00  -1.7324954e+00
   2.3850640e+01  -2.0941408e+01   2.5000000e+02  -2.1633463e-03  -5.4253189e+00  -1.5285795e+00
   2.3718127e+01  -2.0906075e+01   2.5000000e+02  -1.5781084e-01  -5.5224855e+00  -1.3388746e+00
   2.3584587e+01  -2.0874402e+01   2.5000000e+02  -3.1972988e-01  -5.6417638e+00  -1.1565333e+00
   2.3450134e+01  -2.0846414e+01   2.5000000e+02  -4.8438226e-01  -5.7846369e+00  -9.7369846e-01
   2.3314881e+01  -2.0822136e+01   2.5000000e+02  -6.4864503e-01  -5.9508102e+00  -7.8201461e-01
   2.3178943e+01  -2.0801588e+01   2.5000000e+02  -8.0983808e-01  -6.1382693e+00  -5.7312221e-01
   2.3042434e+01  -2.0784787e+01   2.5000000e+02  -9.6571616e-01  -6.3434250e+00  -3.3909183e-01
   2.2905469e+01  -2.0771748e+01   2.5000000e+02  -1.1144335e+00  -6.5613002e+00  -7.2809493e-02
   2.2768162e+01  -2.0762482e+01   2.5000000e+02  -1.2544989e+00  -6.7857535e+00   2.3169843e-01
   2.2630631e+01  -2.0756996e+01   2.5000000e+02  -1.3847092e+00  -7.0097224e+00   5.7898374e-01
   2.2492990e+01  -2.0755296e+01   2.5000000e+02  -1.5040846e+00  -7.2255123e+00   9.7199189e-01
   2.2355354e+01  -2.0757382e+01   2.5000000e+02  -1.6117988e+00  -7.4250709e+00   1.4118982e+00
   2.2217840e+01  -2.0763253e+01   2.5000000e+02  -1.7071079e+00  -7.6002894e+00   1.8980285e+00
   2.2080563e+01  -2.0772904e+01   2.5000000e+02  -1.7893068e+00  -7.7433110e+00   2.4278438e+00
   2.1943639e+01  -2.0786326e+01   2.5000000e+02  -1.8576963e+00  -7.8468416e+00   2.9969652e+00
   2.1807183e+01  -2.0803510e+01   2.5000000e+02  -1.9115737e+00  -7.9044810e+00   3.5992881e+00
   2.1671309e+01  -2.0824438e+01   2.5000000e+02  -1.9502573e+00  -7.9110527e+00   4.2271364e+00
   2.1536133e+01  -2.0849095e+01   2.5000000e+02  -1.9730972e+00  -7.8629428e+00   4.8715407e+00
   2.1401768e+01  -2.0877460e+01   2.5000000e+02  -1.9795158e+00  -7.7583874e+00   5.5226090e+00
   2.1268327e+01  -2.0909507e+01   2.5000000e+02  -1.9690223e+00  -7.5976836e+00   6.1699868e+00
   2.1135925e+01  -2.0945211e+01   2.5000000e+02  -1.9411989e+00  -7.3832717e+00   6.8034075e+00
   2.1004672e+01  -2.0984540e+01   2.5000000e+02  -1.8956887e+00  -7.1196237e+00   7.4132714e+00
   2.0874681e+01  -2.1027462e+01   2.5000000e+02  -1.8321401e+00  -6.8129736e+00   7.9911480e+00
   2.0746062e+01  -2.1073939e+01   2.5000000e+02  -1.7501759e+00  -6.4708538e+00   8.5301886e+00
   2.0618925e+01  -2.1123933e+01   2.5000000e+02  -1.6493556e+00  -6.1015412e+00   9.0253554e+00
   2.0493378e+01  -2.1177402e+01   2.5000000e+02  -1.5291929e+00  -5.7134567e+00   9.4734520e+00
   2.0369531e+01  -2.1234298e+01   2.5000000e+02  -1.3892151e+00  -5.3146337e+00   9.8729593e+00
   2.0247488e+01  -2.1294575e+01   2.5000000e+02  -1.2290391e+00  -4.9122680e+00   1.0223787e+01
   2.0127355e+01  -2.1358180e+01   2.5000000e+02  -1.0485136e+00  -4.5124789e+00   1.0526880e+01
   2.0009238e+01  -2.1425060e+01   2.5000000e+02  -8.4782365e-01  -4.1202052e+00   1.0783884e+01
   1.9893237e+01  -2.1495158e+01   2.5000000e+02  -6.2759570e-01  -3.7392317e+00   1.0996839e+01
   1.9779456e+01  -2.1568413e+01   2.5000000e+02  -3.8894965e-01  -3.3723660e+00   1.1167929e+01
   1.9667993e+01  -2.1644763e+01   2.5000000e+02  -1.3348307e-01  -3.0216007e+00   1.1299358e+01
   1.9558947e+01  -2.1724142e+01   2.5000000e+02   1.3677495e-01  -2.6883356e+00   1.1393250e+01
   1.9452415e+01  -2.1806483e+01   2.5000000e+02   4.1946551e-01  -2.3735416e+00   1.1451620e+01
   1.9348492e+01  -2.1891715e+01   2.5000000e+02   7.1199797e-01  -2.0778971e+00   1.1476358e+01
   1.9247271e+01  -2.1979765e+01   2.5000000e+02   1.0116590e+00  -1.8018783e+00   1.1469225e+01
   1.9148843e+01  -2.2070556e+01   2.5000000e+02   1.3156900e+00  -1.5458142e+00   1.1431852e+01
   1.9053298e+01  -2.2164012e+01   2.5000000e+02   1.6213615e+00  -1.3099123e+00   1.1365736e+01
   1.8960724e+01  -2.2260050e+01   2.5000000e+02   1.9259803e+00  -1.0942615e+00   1.1272250e+01
   1.8871205e+01  -2.2358588e+01   2.5000000e+02   2.2269263e+00  -8.9882198e-01   1.1152641e+01
   1.8784825e+01  -2.2459542e+01   2.5000000e+02   2.5216410e+00  -7.2342983e-01   1.1008049e+01
   1.8701666e+01  -2.2562822e+01   2.5000000e+02   2.8076060e+00  -5.6779333e-01   1.0839535e+01
   1.8621805e+01  -2.2668340e+01   2.5000000e+02   3.0823589e+00  -4.3150452e-01   1.0648099e+01
   1.8545320e+01  -2.2776004e+01   2.5000000e+02   3.3434772e+00  -3.1408278e-01   1.0434747e+01
   1.8472284e+01  -2.2885720e+01   2.5000000e+02   3.5886028e+00  -2.1500451e-01   1.0200541e+01
   1.8402770e+01  -2.2997391e+01   2.5000000e+02   3.8154853e+00  -1.3375812e-01   9.9466816e+00
   1.8336845e+01  -2.3110921e+01   2.5000000e+02   4.0220610e+00  -6.9868706e-02   9.6745585e+00
   1.8274577e+01  -2.3226210e+01   2.5000000e+02   4.2065394e+00  -2.2926396e-02   9.3858133e+00
   1.8216029e+01  -2.3343157e+01   2.5000000e+02   4.3675102e+00   7.4352327e-03   9.0823322e+00
   1.8161262e+01  -2.3461657e+01   2.5000000e+02   4.5040288e+00   2.1569506e-02   8.7662050e+00
   1.8110335e+01  -2.3581608e+01   2.5000000e+02   4.6156762e+00   1.9860078e-02   8.4396036e+00
   1.8063301e+01  -2.3702902e+01   2.5000000e+02   4.7025244e+00   2.7955043e-03   8.1046603e+00
   1.8020214e+01  -2.3825432e+01   2.5000000e+02   4.7650628e+00  -2.9012865e-02   7.7633020e+00
   1.7981122e+01  -2.3949089e+01   2.5000000e+02   4.8040244e+00  -7.4787988e-02   7.4171351e+00
   1.7946072e+01  -2.4073763e+01   2.5000000e+02   4.8201853e+00  -1.3360962e-01   7.0673908e+00
   1.7915107e+01  -2.4199342e+01   2.5000000e+02   4.8141479e+00  -2.0443957e-01   6.7149635e+00
   1.7888265e+01  -2.4325714e+01   2.5000000e+02   4.7861694e+00  -2.8617405e-01   6.3605355e+00
   1.7865583e+01  -2.4452765e+01   2.5000000e+02   4.7360799e+00  -3.7771106e-01   6.0047833e+00
   1.7847095e+01  -2.4580380e+01   2.5000000e+02   4.6633034e+00  -4.7799407e-01   5.6486057e+00
   1.7832828e+01  -2.4708444e+01   2.5000000e+02   4.5669903e+00  -5.8602676e-01   5.2933299e+00
   1.7822810e+01  -2.4836842e+01   2.5000000e+02   4.4462517e+00  -7.0089739e-01   4.9408466e+00
   1.7817062e+01  -2.4965456e+01   2.5000000e+02   4.3004262e+00  -8.2172385e-01   4.5936526e+00
   1.7815603e+01  -2.5094168e+01   2.5000000e+02   4.1293521e+00  -9.4763156e-01   4.2547584e+00
   1.7818447e+01  -2.5222862e+01   2.5000000e+02   3.9335785e+00  -1.0777013e+00   3.9275023e+00
   1.7825607e+01  -2.5351418e+01   2.5000000e+02   3.7145118e+00  -1.2109447e+00   3.6153139e+00
   1.7837088e+01  -2.5479719e+01   2.5000000e+02   3.4744407e+00  -1.3462798e+00   3.3214196e+00
   1.7852895e+01  -2.5607646e+01   2.5000000e+02   3.2164985e+00  -1.4825731e+00   3.0485735e+00
   1.7873026e+01  -2.5735080e+01   2.5000000e+02   2.9445249e+00  -1.6186644e+00   2.7988093e+00
   1.7897477e+01  -2.5861902e+01   2.5000000e+02   2.6628733e+00  -1.7534439e+00   2.5732366e+00
   1.7926240e+01  -2.5987996e+01   2.5000000e+02   2.3761538e+00  -1.8859084e+00   2.3718979e+00
   1.7959301e+01  -2.6113241e+01   2.5000000e+02   2.0889631e+00  -2.0151989e+00   2.1937125e+00
   1.7996643e+01  -2.6237521e+01   2.5000000e+02   1.8055502e+00  -2.1406362e+00   2.0364746e+00
   1.8038245e+01  -2.6360719e+01   2.5000000e+02   1.5295151e+00  -2.2617059e+00   1.8969697e+00
   1.8084083e+01  -2.6482717e+01   2.5000000e+02   1.2635212e+00  -2.3780251e+00   1.7711729e+00
   1.8134125e+01  -2.6603401e+01   2.5000000e+02   1.0090605e+00  -2.4892680e+00   1.6545400e+00
   1.8188338e+01  -2.6722654e+01   2.5000000e+02   7.6633435e-01  -2.5951176e+00   1.5423489e+00
   1.8246685e+01  -2.6840364e+01   2.5000000e+02   5.3422005e-01  -2.6951836e+00   1.4300760e+00
   1.8309121e+01  -2.6956416e+01   2.5000000e+02   3.1039194e-01  -2.7889338e+00   1.3137703e+00
   1.8375601e+01  -2.7070700e+01   2.5000000e+02   9.1521791e-02  -2.8756677e+00   1.1903592e+00
   1.8446073e+01  -2.7183105e+01   2.5000000e+02  -1.2639672e-01  -2.9544839e+00   1.0579079e+00
   1.8520480e+01  -2.7293523e+01   2.5000000e+02  -3.4768154e-01  -3.0242969e+00   9.1577028e-01
   1.8598764e+01  -2.7401844e+01   2.5000000e+02  -5.7655613e-01  -3.0839036e+00   7.6463498e-01
   1.8680860e+01  -2.7507965e+01   2.5000000e+02  -8.1675957e-01  -3.1320507e+00   6.0648199e-01
   1.8766698e+01  -2.7611781e+01   2.5000000e+02  -1.0711742e+00  -3.1675741e+00   4.4442036e-01
   1.8856206e+01  -2.7713190e+01   2.5000000e+02  -1.3415429e+00  -3.1895447e+00   2.8242013e-01
   1.8949307e+01  -2.7812092e+01   2.5000000e+02  -1.6282662e+00  -3.1974091e+00   1.2496440e-01
   1.9045919e+01  -2.7908389e+01   2.5000000e+02  -1.9303217e+00  -3.1911079e+00  -2.3375103e-02
   1.9145956e+01  -2.8001987e+01   2.5000000e+02  -2.2453199e+00  -3.1711358e+00  -1.5839933e-01
   1.9249328e+01  -2.8092791e+01   2.5000000e+02  -2.5696814e+00  -3.1385307e+00  -2.7673399e-01
   1.9355941e+01  -2.8180711e+01   2.5000000e+02  -2.8989497e+00  -3.0947511e+00  -3.7620536e-01
   1.9465698e+01  -2.8265659e+01   2.5000000e+02  -3.2281718e+00  -3.0414796e+00  -4.5609684e-01
   1.9578496e+01  -2.8347550e+01   2.5000000e+02  -3.5523113e+00  -2.9803524e+00  -5.1722371e-01
   1.9694230e+01  -2.8426301e+01   2.5000000e+02  -3.8666425e+00  -2.9126734e+00  -5.6183276e-01
   1.9812791e+01  -2.8501834e+01   2.5000000e+02  -4.1670602e+00  -2.8391417e+00  -5.9330071e-01
   1.9934064e+01  -2.8574071e+01   2.5000000e+02  -4.4502552e+00  -2.7596700e+00  -6.1571382e-01
   2.0057933e+01  -2.8642939e+01   2.5000000e+02  -4.7137787e+00  -2.6732971e+00  -6.3336716e-01
   2.0184280e+01  -2.8708368e+01   2.5000000e+02  -4.9559567e+00  -2.5782306e+00  -6.5027643e-01
   2.0312979e+01  -2.8770292e+01   2.5000000e+02  -5.1757069e+00  -2.4719945e+00  -6.6974989e-01
   2.0443904e+01  -2.8828647e+01   2.5000000e+02  -5.3723222e+00  -2.3516532e+00  -6.9411947e-01
   2.0576927e+01  -2.8883373e+01   2.5000000e+02  -5.5452437e+00  -2.2140519e+00  -7.2457558e-01
   2.0711915e+01  -2.8934415e+01   2.5000000e+02  -5.6938717e+00  -2.0560406e+00  -7.6111868e-01
   2.0848732e+01  -2.8981720e+01   2.5000000e+02  -5.8174457e+00  -1.8746493e+00  -8.0261038e-01
   2.0987242e+01  -2.9025238e+01   2.5000000e+02  -5.9150027e+00  -1.6671965e+00  -8.4683127e-01
   2.1127305e+01  -2.9064927e+01   2.5000000e+02  -5.9853996e+00  -1.4313687e+00  -8.9048306e-01
   2.1268778e+01  -2.9100743e+01   2.5000000e+02  -6.0273953e+00  -1.1653135e+00  -9.2922164e-01
   2.1411518e+01  -2.9132651e+01   2.5000000e+02  -6.0397784e+00  -8.6777583e-01  -9.5756929e-01
   2.1555379e+01  -2.9160617e+01   2.5000000e+02  -6.0215179e+00  -5.3835270e-01  -9.6892270e-01
   2.1700213e+01  -2.9184612e+01   2.5000000e+02  -5.9719350e+00  -1.7784451e-01  -9.5561073e-01
   2.1845873e+01  -2.9204611e+01   2.5000000e+02  -5.8908811e+00   2.1133049e-01  -9.0915001e-01
   2.1992207e+01  -2.9220594e+01   2.5000000e+02  -5.7789210e+00   6.2471266e-01  -8.2071818e-01
   2.2139067e+01  -2.9232544e+01   2.5000000e+02  -5.6374929e+00   1.0555499e+00  -6.8187672e-01
   2.2286299e+01  -2.9240449e+01   2.5000000e+02  -5.4690457e+00   1.4947321e+00  -4.8544883e-01
   2.2433751e+01  -2.9244300e+01   2.5000000e+02  -5.2770963e+00   1.9311032e+00  -2.2645939e-01
   2.2581273e+01  -2.9244093e+01   2.5000000e+02  -5.0661954e+00   2.3520823e+00   9.7052666e-02
   2.2728710e+01  -2.9239829e+01   2.5000000e+02  -4.8417896e+00   2.7445451e+00   4.8345387e-01
   2.2875911e+01  -2.9231512e+01   2.5000000e+02  -4.6099449e+00   3.0959128e+00   9.2734036e-01
   2.3022724e+01  -2.9219151e+01   2.5000000e+02  -4.3769933e+00   3.3951942e+00   1.4197674e+00
   2.3168997e+01  -2.9202758e+01   2.5000000e+02  -4.1491222e+00   3.6338962e+00   1.9488693e+00
   2.3314579e+01  -2.9182350e+01   2.5000000e+02  -3.9319677e+00   3.8066500e+00   2.5007856e+00
   2.3459321e+01  -2.9157949e+01   2.5000000e+02  -3.7302721e+00   3.9114997e+00   3.0607425e+00
   2.3603074e+01  -2.9129581e+01   2.5000000e+02  -3.5476570e+00   3.9498451e+00   3.6141384e+00
   2.3745692e+01  -2.9097273e+01   2.5000000e+02  -3.3865265e+00   3.9260867e+00   4.1475417e+00
   2.3887028e+01  -2.9061061e+01   2.5000000e+02  -3.2480952e+00   3.8470234e+00   4.6494701e+00
   2.4026939e+01  -2.9020980e+01   2.5000000e+02  -3.1325449e+00   3.7211353e+00   5.1109248e+00
   2.4165283e+01  -2.8977074e+01   2.5000000e+02  -3.0392328e+00   3.5577891e+00   5.5256283e+00
   2.4301920e+01  -2.8929386e+01   2.5000000e+02  -2.9669633e+00   3.3665112e+00   5.8899887e+00
   2.4436714e+01  -2.8877967e+01   2.5000000e+02  -2.9142110e+00   3.1563383e+00   6.2028487e+00
   2.4569529e+01  -2.8822868e+01   2.5000000e+02  -2.8793479e+00   2.9353664e+00   6.4650385e+00
   2.5284045e+01  -2.8598997e+01   2.5000000e+02  -2.5544687e+00   1.5105628e+00   7.2619249e+00
   2.5402001e+01  -2.8523370e+01   2.5000000e+02  -2.5998047e+00   1.3275391e+00   7.2781283e+00
   2.5517216e+01  -2.8444644e+01   2.5000000e+02  -2.6543274e+00   1.1581530e+00   7.2688336e+00
   2.5629585e+01  -2.8362894e+01   2.5000000e+02  -2.7169325e+00   1.0033746e+00   7.2360760e+00
   2.5739012e+01  -2.8278198e+01   2.5000000e+02  -2.7865468e+00   8.6424413e-01   7.1816223e+00
   2.5845402e+01  -2.8190634e+01   2.5000000e+02  -2.8621788e+00   7.4195640e-01   7.1071264e+00
   2.5948661e+01  -2.8100286e+01   2.5000000e+02  -2.9429714e+00   6.3782411e-01   7.0142958e+00
   2.6048704e+01  -2.8007237e+01   2.5000000e+02  -3.0283039e+00   5.5315434e-01   6.9050011e+00
   2.6145445e+01  -2.7911575e+01   2.5000000e+02  -3.1178995e+00   4.8908046e-01   6.7813155e+00
   2.6238805e+01  -2.7813389e+01   2.5000000e+02  -3.2119142e+00   4.4633598e-01   6.6454339e+00
   2.6328707e+01  -2.7712769e+01   2.5000000e+02  -3.3109793e+00   4.2506413e-01   6.4994875e+00
   2.6415077e+01  -2.7609809e+01   2.5000000e+02  -3.4161424e+00   4.2466674e-01   6.3452818e+00
   2.6497849e+01  -2.7504604e+01   2.5000000e+02  -3.5287091e+00   4.4374740e-01   6.1840005e+00
   2.6576956e+01  -2.7397250e+01   2.5000000e+02  -3.6499956e+00   4.8018201e-01   6.0159604e+00
   2.6652337e+01  -2.7287846e+01   2.5000000e+02  -3.7809835e+00   5.3125555e-01   5.8404785e+00
   2.6723936e+01  -2.7176491e+01   2.5000000e+02  -3.9219798e+00   5.9389301e-01   5.6558954e+00
   2.6791700e+01  -2.7063287e+01   2.5000000e+02  -4.0723144e+00   6.6491169e-01   5.4597853e+00
   2.6855579e+01  -2.6948337e+01   2.5000000e+02  -4.2301625e+00   7.4126370e-01   5.2493108e+00
   2.6915529e+01  -2.6831743e+01   2.5000000e+02  -4.3925245e+00   8.2022441e-01   5.0216706e+00
   2.6971508e+01  -2.6713612e+01   2.5000000e+02  -4.5553757e+00   8.9950962e-01   4.7745711e+00
   2.7023479e+01  -2.6594048e+01   2.5000000e+02  -4.7139904e+00   9.7733101e-01   4.5065967e+00
   2.7071409e+01  -2.6473160e+01   2.5000000e+02  -4.8633390e+00   1.0523792e+00   4.2174762e+00
   2.7115268e+01  -2.6351054e+01   2.5000000e+02  -4.9985451e+00   1.1237882e+00   3.9081462e+00
   2.7155030e+01  -2.6227838e+01   2.5000000e+02  -5.1152794e+00   1.1910663e+00   3.5806916e+00
   2.7190675e+01  -2.6103623e+01   2.5000000e+02  -5.2100751e+00   1.2540256e+00   3.2381641e+00
   2.7222184e+01  -2.5978518e+01   2.5000000e+02  -5.2805447e+00   1.3127209e+00   2.8843062e+00
   2.7249543e+01  -2.5852632e+01   2.5000000e+02  -5.3254700e+00   1.3673716e+00   2.5232860e+00
   2.7272741e+01  -2.5726075e+01   2.5000000e+02  -5.3448122e+00   1.4182847e+00   2.1594335e+00
   2.7291773e+01  -2.5598959e+01   2.5000000e+02  -5.3396552e+00   1.4657725e+00   1.7970049e+00
   2.7306634e+01  -2.5471393e+01   2.5000000e+02  -5.3121102e+00   1.5100811e+00   1.4399339e+00
   2.7317326e+01  -2.5343488e+01   2.5000000e+02  -5.2651774e+00   1.5513159e+00   1.0916382e+00
   2.7323852e+01  -2.5215355e+01   2.5000000e+02  -5.2025764e+00   1.5893926e+00   7.5478708e-01
   2.7326221e+01  -2.5087105e+01   2.5000000e+02  -5.1285218e+00   1.6239957e+00   4.3109991e-01
   2.7324443e+01  -2.4958846e+01   2.5000000e+02  -5.0474414e+00   1.6545520e+00   1.2115213e-01
   2.7318532e+01  -2.4830689e+01   2.5000000e+02  -4.9636378e+00   1.6801993e+00  -1.7571897e-01
   2.7308508e+01  -2.4702744e+01   2.5000000e+02  -4.8809028e+00   1.6997583e+00  -4.6143109e-01
   2.7294390e+01  -2.4575119e+01   2.5000000e+02  -4.8021241e+00   1.7117067e+00  -7.3904248e-01
   2.7276203e+01  -2.4447922e+01   2.5000000e+02  -4.7289305e+00   1.7141657e+00  -1.0124510e+00
   2.7253974e+01  -2.4321261e+01   2.5000000e+02  -4.6614353e+00   1.7049231e+00  -1.2859652e+00
   2.7227735e+01  -2.4195243e+01   2.5000000e+02  -4.5981349e+00   1.6815086e+00  -1.5637470e+00
   2.7197519e+01  -2.4069973e+01   2.5000000e+02  -4.5360128e+00   1.6413321e+00  -1.8492194e+00
   2.7163362e+01  -2.3945558e+01   2.5000000e+02  -4.4708692e+00   1.5818829e+00  -2.1444978e+00
   2.7125304e+01  -2.3822100e+01   2.5000000e+02  -4.3978499e+00   1.5009626e+00  -2.4499960e+00
   2.7083388e+01  -2.3699702e+01   2.5000000e+02  -4.3121103e+00   1.3969207e+00  -2.7642570e+00
   2.7037658e+01  -2.3578467e+01   2.5000000e+02  -4.2094917e+00   1.2688418e+00  -3.0840946e+00
   2.6988164e+01  -2.3458495e+01   2.5000000e+02  -4.0870874e+00   1.1166428e+00  -3.4050037e+00
   2.6934955e+01  -2.3339886e+01   2.5000000e+02  -3.9435699e+00   9.4105889e-01  -3.7217792e+00
   2.6878085e+01  -2.3222737e+01   2.5000000e+02  -3.7792320e+00   7.4351456e-01  -4.0291760e+00
   2.6817610e+01  -2.3107144e+01   2.5000000e+02  -3.5957366e+00   5.2591167e-01  -4.3224817e+00
   2.6753589e+01  -2.2993204e+01   2.5000000e+02  -3.3956674e+00   2.9038273e-01  -4.5978640e+00
   2.6686081e+01  -2.2881009e+01   2.5000000e+02  -3.1819863e+00   3.9044823e-02  -4.8524611e+00
   2.6615151e+01  -2.2770651e+01   2.5000000e+02  -2.9575697e+00  -2.2615602e-01  -5.0841849e+00
   2.6540863e+01  -2.2662220e+01   2.5000000e+02  -2.7248736e+00  -5.0352343e-01  -5.2913850e+00
   2.6463287e+01  -2.2555805e+01   2.5000000e+02  -2.4858307e+00  -7.9156806e-01  -5.4724426e+00
   2.6382491e+01  -2.2451492e+01   2.5000000e+02  -2.2419119e+00  -1.0888974e+00  -5.6254551e+00
   2.6298547e+01  -2.2349366e+01   2.5000000e+02  -1.9943522e+00  -1.3940336e+00  -5.7480612e+00
   2.6211531e+01  -2.2249510e+01   2.5000000e+02  -1.7444184e+00  -1.7052354e+00  -5.8374675e+00
   2.6121518e+01  -2.2152005e+01   2.5000000e+02  -1.4936454e+00  -2.0203602e+00  -5.8906466e+00
   2.6028587e+01  -2.2056929e+01   2.5000000e+02  -1.2440124e+00  -2.3367777e+00  -5.9046485e+00
   2.5932816e+01  -2.1964359e+01   2.5000000e+02  -9.9800309e-01  -2.6513630e+00  -5.8769541e+00
   2.5834289e+01  -2.1874369e+01   2.5000000e+02  -7.5858936e-01  -2.9605480e+00  -5.8058161e+00
   2.5733089e+01  -2.1787033e+01   2.5000000e+02  -5.2912588e-01  -3.2604361e+00  -5.6905298e+00
   2.5629301e+01  -2.1702420e+01   2.5000000e+02  -3.1321583e-01  -3.5469544e+00  -5.5316344e+00
   2.5523013e+01  -2.1620598e+01   2.5000000e+02  -1.1456441e-01  -3.8160218e+00  -5.3310396e+00
   2.5414312e+01  -2.1541632e+01   2.5000000e+02   6.3183233e-02  -4.0637623e+00  -5.0920812e+00
   2.5303289e+01  -2.1465587e+01   2.5000000e+02   2.1659161e-01  -4.2867314e+00  -4.8195308e+00
   2.5190035e+01  -2.1392522e+01   2.5000000e+02   3.4260751e-01  -4.4821983e+00  -4.5195143e+00
   2.5074643e+01  -2.1322496e+01   2.5000000e+02   4.3872600e-01  -4.6484275e+00  -4.1993506e+00
   2.4957208e+01  -2.1255564e+01   2.5000000e+02   5.0316431e-01  -4.7849680e+00  -3.8672606e+00
   2.4837825e+01  -2.1191781e+01   2.5000000e+02   5.3501666e-01  -4.8928868e+00  -3.5319428e+00
   2.4716590e+01  -2.1131197e+01   2.5000000e+02   5.3436539e-01  -4.9749006e+00  -3.2020263e+00
   2.4593602e+01  -2.1073860e+01   2.5000000e+02   5.0232540e-01  -5.0353531e+00  -2.8854530e+00
   2.4468959e+01  -2.1019816e+01   2.5000000e+02   4.4100536e-01  -5.0800200e+00  -2.5888362e+00
   2.4342761e+01  -2.0969108e+01   2.5000000e+02   3.5338022e-01  -5.1157383e+00  -2.3169101e+00
   2.4215110e+01  -2.0921775e+01   2.5000000e+02   2.4309017e-01  -5.1498999e+00  -2.0721293e+00
   2.4086107e+01  -2.0877856e+01   2.5000000e+02   1.1419507e-01  -5.1898803e+00  -1.8544762e+00
   2.3955855e+01  -2.0837385e+01   2.5000000e+02  -2.9087601e-02  -5.2424654e+00  -1.6615033e+00
   2.3824456e+01  -2.0800394e+01   2.5000000e+02  -1.8262068e-01  -5.3133603e+00  -1.4885758e+00
   2.3692016e+01  -2.0766913e+01   2.5000000e+02  -3.4253499e-01  -5.4068157e+00  -1.3292793e+00
   2.3558639e+01  -2.0736969e+01   2.5000000e+02  -5.0536874e-01  -5.5254027e+00  -1.1759027e+00
   2.3424429e+01  -2.0710584e+01   2.5000000e+02  -6.6814193e-01  -5.6699171e+00  -1.0199632e+00
   2.3289494e+01  -2.0687779e+01   2.5000000e+02  -8.2836929e-01  -5.8393958e+00  -8.5271438e-01
   2.3153938e+01  -2.0668574e+01   2.5000000e+02  -9.8405015e-01  -6.0312281e+00  -6.6559539e-01
   2.3017869e+01  -2.0652982e+01   2.5000000e+02  -1.1336204e+00  -6.2412947e+00  -4.5065606e-01
   2.2881394e+01  -2.0641017e+01   2.5000000e+02  -1.2758836e+00  -6.4641820e+00  -2.0089511e-01
   2.2744620e+01  -2.0632688e+01   2.5000000e+02  -1.4099387e+00  -6.6934037e+00   8.9436677e-02
   2.2607654e+01  -2.0628000e+01   2.5000000e+02  -1.5350946e+00  -6.9216575e+00   4.2460049e-01
   2.2470603e+01  -2.0626959e+01   2.5000000e+02  -1.6507802e+00  -7.1411015e+00   8.0720483e-01
   2.2333575e+01  -2.0629565e+01   2.5000000e+02  -1.7564715e+00  -7.3436289e+00   1.2380812e+00
   2.2196678e+01  -2.0635815e+01   2.5000000e+02  -1.8516259e+00  -7.5211582e+00   1.7162406e+00
   2.2060019e+01  -2.0645705e+01   2.5000000e+02  -1.9356394e+00  -7.6659225e+00   2.2388853e+00
   2.1923705e+01  -2.0659227e+01   2.5000000e+02  -2.0078348e+00  -7.7707570e+00   2.8014522e+00
   2.1787844e+01  -2.0676371e+01   2.5000000e+02  -2.0674727e+00  -7.8294044e+00   3.3977173e+00
   2.1652541e+01  -2.0697122e+01   2.5000000e+02  -2.1137920e+00  -7.8368300e+00   4.0199736e+00
   2.1517904e+01  -2.0721465e+01   2.5000000e+02  -2.1460479e+00  -7.7895422e+00   4.6592709e+00
   2.1384039e+01  -2.0749379e+01   2.5000000e+02  -2.1635637e+00  -7.6858776e+00   5.3057762e+00
   2.1251050e+01  -2.0780844e+01   2.5000000e+02  -2.1657482e+00  -7.5262146e+00   5.9492461e+00
   2.1119044e+01  -2.0815834e+01   2.5000000e+02  -2.1521019e+00  -7.3130602e+00   6.5795225e+00
   2.0988125e+01  -2.0854321e+01   2.5000000e+02  -2.1221840e+00  -7.0509595e+00   7.1871317e+00
   2.0858395e+01  -2.0896275e+01   2.5000000e+02  -2.0755593e+00  -6.7462180e+00   7.7638014e+00
   2.0729960e+01  -2.0941663e+01   2.5000000e+02  -2.0117387e+00  -6.4064682e+00   8.3028458e+00
   2.0602920e+01  -2.0990449e+01   2.5000000e+02  -1.9301373e+00  -6.0400749e+00   8.7994387e+00
   2.0477377e+01  -2.1042593e+01   2.5000000e+02  -1.8300674e+00  -5.6555395e+00   9.2506169e+00
   2.0353432e+01  -2.1098055e+01   2.5000000e+02  -1.7107743e+00  -5.2609203e+00   9.6551409e+00
   2.0231184e+01  -2.1156791e+01   2.5000000e+02  -1.5715412e+00  -4.8633719e+00   1.0013181e+01
   2.0110731e+01  -2.1218753e+01   2.5000000e+02  -1.4118257e+00  -4.4688608e+00   1.0325928e+01
   1.9992172e+01  -2.1283893e+01   2.5000000e+02  -1.2314011e+00  -4.0820653e+00   1.0595206e+01
   1.9875602e+01  -2.1352159e+01   2.5000000e+02  -1.0304971e+00  -3.7064145e+00   1.0823138e+01
   1.9761115e+01  -2.1423495e+01   2.5000000e+02  -8.0988764e-01  -3.3442694e+00   1.1011894e+01
   1.9648807e+01  -2.1497846e+01   2.5000000e+02  -5.7090021e-01  -2.9971633e+00   1.1163553e+01
   1.9538769e+01  -2.1575152e+01   2.5000000e+02  -3.1538847e-01  -2.6660214e+00   1.1280041e+01
   1.9431092e+01  -2.1655351e+01   2.5000000e+02  -4.5628385e-02  -2.3513888e+00   1.1363128e+01
   1.9325865e+01  -2.1738378e+01   2.5000000e+02   2.3580758e-01  -2.0535861e+00   1.1414449e+01
   1.9223177e+01  -2.1824168e+01   2.5000000e+02   5.2619465e-01  -1.7728235e+00   1.1435531e+01
   1.9123113e+01  -2.1912651e+01   2.5000000e+02   8.2276196e-01  -1.5092510e+00   1.1427805e+01
   1.9025759e+01  -2.2003757e+01   2.5000000e+02   1.1227982e+00  -1.2629940e+00   1.1392613e+01
   1.8931196e+01  -2.2097411e+01   2.5000000e+02   1.4236941e+00  -1.0341376e+00   1.1331199e+01
   1.8839507e+01  -2.2193539e+01   2.5000000e+02   1.7229829e+00  -8.2272691e-01   1.1244701e+01
   1.8750770e+01  -2.2292062e+01   2.5000000e+02   2.0183189e+00  -6.2873311e-01   1.1134142e+01
   1.8665063e+01  -2.2392902e+01   2.5000000e+02   2.3074717e+00  -4.5205065e-01   1.1000426e+01
   1.8582461e+01  -2.2495976e+01   2.5000000e+02   2.5882741e+00  -2.9249007e-01   1.0844349e+01
   1.8503037e+01  -2.2601201e+01   2.5000000e+02   2.8586019e+00  -1.4979606e-01   1.0666626e+01
   1.8426863e+01  -2.2708492e+01   2.5000000e+02   3.1163426e+00  -2.3681292e-02   1.0467937e+01
   1.8354007e+01  -2.2817760e+01   2.5000000e+02   3.3593849e+00   8.6139740e-02   1.0249004e+01
   1.8284537e+01  -2.2928917e+01   2.5000000e+02   3.5856594e+00   1.7989972e-01   1.0010677e+01
   1.8218518e+01  -2.3041873e+01   2.5000000e+02   3.7931929e+00   2.5775796e-01   9.7540204e+00
   1.8156010e+01  -2.3156533e+01   2.5000000e+02   3.9801962e+00   3.1980301e-01   9.4803969e+00
   1.8097074e+01  -2.3272805e+01   2.5000000e+02   4.1452018e+00   3.6605660e-01   9.1914770e+00
   1.8041768e+01  -2.3390593e+01   2.5000000e+02   4.2871596e+00   3.9653577e-01   8.8892210e+00
   1.7990146e+01  -2.3509799e+01   2.5000000e+02   4.4055205e+00   4.1131954e-01   8.5757773e+00
   1.7942261e+01  -2.3630324e+01   2.5000000e+02   4.5002602e+00   4.1060732e-01   8.2533322e+00
   1.7898162e+01  -2.3752070e+01   2.5000000e+02   4.5718184e+00   3.9477716e-01   7.9239308e+00
   1.7857895e+01  -2.3874935e+01   2.5000000e+02   4.6209527e+00   3.6441530e-01   7.5893354e+00
   1.7821506e+01  -2.3998817e+01   2.5000000e+02   4.6485450e+00   3.2029679e-01   7.2509209e+00
   1.7789035e+01  -2.4123612e+01   2.5000000e+02   4.6553650e+00   2.6336580e-01   6.9096721e+00
   1.7760520e+01  -2.4249215e+01   2.5000000e+02   4.6418711e+00   1.9466216e-01   6.5662789e+00
   1.7735997e+01  -2.4375522e+01   2.5000000e+02   4.6080759e+00   1.1524869e-01   6.2213151e+00
   1.7715499e+01  -2.4502426e+01   2.5000000e+02   4.5535167e+00   2.6156797e-02   5.8754849e+00
   1.7699054e+01  -2.4629820e+01   2.5000000e+02   4.4773472e+00  -7.1651529e-02   5.5298502e+00
   1.7686689e+01  -2.4757596e+01   2.5000000e+02   4.3785405e+00  -1.7730552e-01   5.1860122e+00
   1.7678427e+01  -2.4885645e+01   2.5000000e+02   4.2561553e+00  -2.8999735e-01   4.8461921e+00
   1.7674288e+01  -2.5013859e+01   2.5000000e+02   4.1096217e+00  -4.0894531e-01   4.5131867e+00
   1.7674287e+01  -2.5142128e+01   2.5000000e+02   3.9389926e+00  -5.3333269e-01   4.1902250e+00
   1.7678438e+01  -2.5270341e+01   2.5000000e+02   3.7451239e+00  -6.6227638e-01   3.8807285e+00
   1.7686750e+01  -2.5398390e+01   2.5000000e+02   3.5297421e+00  -7.9479207e-01   3.5880227e+00
   1.7699230e+01  -2.5526163e+01   2.5000000e+02   3.2954392e+00  -9.2980116e-01   3.3150704e+00
   1.7715881e+01  -2.5653549e+01   2.5000000e+02   3.0455603e+00  -1.0661625e+00   3.0642068e+00
   1.7736700e+01  -2.5780439e+01   2.5000000e+02   2.7840319e+00  -1.2027235e+00   2.8369356e+00
   1.7761684e+01  -2.5906722e+01   2.5000000e+02   2.5151587e+00  -1.3384038e+00   2.6337871e+00
   1.7790825e+01  -2.6032286e+01   2.5000000e+02   2.2433696e+00  -1.4722422e+00   2.4542349e+00
   1.7824110e+01  -2.6157023e+01   2.5000000e+02   1.9729348e+00  -1.6034398e+00   2.2966762e+00
   1.7861523e+01  -2.6280823e+01   2.5000000e+02   1.7076969e+00  -1.7313744e+00   2.1585003e+00
   1.7903046e+01  -2.6403575e+01   2.5000000e+02   1.4507905e+00  -1.8555834e+00   2.0362260e+00
   1.7948655e+01  -2.6525172e+01   2.5000000e+02   1.2043871e+00  -1.9757044e+00   1.9257250e+00
   1.7998322e+01  -2.6645506e+01   2.5000000e+02   9.6952267e-01  -2.0914168e+00   1.8225145e+00
   1.8052016e+01  -2.6764468e+01   2.5000000e+02   7.4600115e-01  -2.2023781e+00   1.7220911e+00
   1.8109704e+01  -2.6881953e+01   2.5000000e+02   5.3239426e-01  -2.3081636e+00   1.6202752e+00
   1.8171344e+01  -2.6997854e+01   2.5000000e+02   3.2617495e-01  -2.4082032e+00   1.5135471e+00
   1.8236896e+01  -2.7112068e+01   2.5000000e+02   1.2392266e-01  -2.5017812e+00   1.3993007e+00
   1.8306311e+01  -2.7224492e+01   2.5000000e+02  -7.8367654e-02  -2.5880049e+00   1.2760529e+00
   1.8379539e+01  -2.7335022e+01   2.5000000e+02  -2.8494142e-01  -2.6658467e+00   1.1435380e+00
   1.8456526e+01  -2.7443559e+01   2.5000000e+02  -4.9992402e-01  -2.7341796e+00   1.0027256e+00
   1.8537213e+01  -2.7550003e+01   2.5000000e+02  -7.2695226e-01  -2.7918558e+00   8.5574953e-01
   1.8621536e+01  -2.7654256e+01   2.5000000e+02  -9.6885216e-01  -2.8378069e+00   7.0575129e-01
   1.8709430e+01  -2.7756224e+01   2.5000000e+02  -1.2273780e+00  -2.8711695e+00   5.5663671e-01
   1.8800824e+01  -2.7855811e+01   2.5000000e+02  -1.5030096e+00  -2.8914063e+00   4.1277632e-01
   1.8895644e+01  -2.7952925e+01   2.5000000e+02  -1.7948754e+00  -2.8984145e+00   2.7863219e-01
   1.8993812e+01  -2.8047477e+01   2.5000000e+02  -2.1007782e+00  -2.8925945e+00   1.5835676e-01
   1.9095245e+01  -2.8139378e+01   2.5000000e+02  -2.4173367e+00  -2.8748620e+00   5.5388272e-02
   1.9199858e+01  -2.8228542e+01   2.5000000e+02  -2.7402571e+00  -2.8465810e+00  -2.7914529e-02
   1.9307562e+01  -2.8314886e+01   2.5000000e+02  -3.0646813e+00  -2.8094134e+00  -9.0535443e-02
   1.9418263e+01  -2.8398328e+01   2.5000000e+02  -3.3855785e+00  -2.7651061e+00  -1.3293260e-01
   1.9531865e+01  -2.8478790e+01   2.5000000e+02  -3.6981488e+00  -2.7152339e+00  -1.5700578e-01
   1.9648269e+01  -2.8556195e+01   2.5000000e+02  -3.9981519e+00  -2.6609455e+00  -1.6589907e-01
   1.9767369e+01  -2.8630471e+01   2.5000000e+02  -4.2821418e+00  -2.6027397e+00  -1.6364227e-01
   1.9889061e+01  -2.8701547e+01   2.5000000e+02  -4.5475792e+00  -2.5403419e+00  -1.5473831e-01
   2.0013234e+01  -2.8769354e+01   2.5000000e+02  -4.7927947e+00  -2.4726644e+00  -1.4368342e-01
   2.0139775e+01  -2.8833829e+01   2.5000000e+02  -5.0168609e+00  -2.3978741e+00  -1.3453606e-01
   2.0268567e+01  -2.8894909e+01   2.5000000e+02  -5.2193691e+00  -2.3135587e+00  -1.3059829e-01
   2.0399494e+01  -2.8952536e+01   2.5000000e+02  -5.4001939e+00  -2.2169248e+00  -1.3419438e-01
   2.0532431e+01  -2.9006654e+01   2.5000000e+02  -5.5592460e+00  -2.1050161e+00  -1.4657259e-01
   2.0667257e+01  -2.9057212e+01   2.5000000e+02  -5.6963002e+00  -1.9748893e+00  -1.6791997e-01
   2.0803844e+01  -2.9104160e+01   2.5000000e+02  -5.8108593e+00  -1.8237491e+00  -1.9741655e-01
   2.0942063e+01  -2.9147453e+01   2.5000000e+02  -5.9021096e+00  -1.6490143e+00  -2.3328961e-01
   2.1081784e+01  -2.9187049e+01   2.5000000e+02  -5.9689341e+00  -1.4483573e+00  -2.7284425e-01
   2.1222873e+01  -2.9222910e+01   2.5000000e+02  -6.0099804e+00  -1.2197552e+00  -3.1242006e-01
   2.1365196e+01  -2.9255000e+01   2.5000000e+02  -6.0237764e+00  -9.6159315e-01  -3.4732717e-01
   2.1508616e+01  -2.9283290e+01   2.5000000e+02  -6.0088729e+00  -6.7287547e-01  -3.7174013e-01
   2.1652996e+01  -2.9307750e+01   2.5000000e+02  -5.9640177e+00  -3.5354315e-01  -3.7873028e-01
   2.1798196e+01  -2.9328358e+01   2.5000000e+02  -5.8883435e+00  -4.8906998e-03  -3.6036304e-01
   2.1944077e+01  -2.9345093e+01   2.5000000e+02  -5.7815734e+00   3.7001542e-01  -3.0808433e-01
   2.2090497e+01  -2.9357939e+01   2.5000000e+02  -5.6442257e+00   7.6597915e-01  -2.1328195e-01
   2.2237314e+01  -2.9366883e+01   2.5000000e+02  -5.4777980e+00   1.1755274e+00  -6.8071224e-02
   2.2384387e+01  -2.9371917e+01   2.5000000e+02  -5.2848966e+00   1.5890316e+00   1.3383954e-01
   2.2531571e+01  -2.9373035e+01   2.5000000e+02  -5.0692925e+00   1.9951312e+00   3.9628520e-01
   2.2678725e+01  -2.9370237e+01   2.5000000e+02  -4.8358414e+00   2.3814742e+00   7.1999615e-01
   2.2825705e+01  -2.9363525e+01   2.5000000e+02  -4.5903015e+00   2.7356293e+00   1.1021948e+00
   2.2972370e+01  -2.9352906e+01   2.5000000e+02  -4.3390094e+00   3.0460968e+00   1.5366050e+00
   2.3118576e+01  -2.9338390e+01   2.5000000e+02  -4.0884937e+00   3.3032326e+00   2.0137900e+00
   2.3264182e+01  -2.9319991e+01   2.5000000e+02  -3.8450341e+00   3.5000030e+00   2.5218544e+00
   2.3409047e+01  -2.9297728e+01   2.5000000e+02  -3.6142611e+00   3.6324445e+00   3.0473405e+00
   2.3553033e+01  -2.9271622e+01   2.5000000e+02  -3.4008328e+00   3.6998298e+00   3.5762434e+00
   2.3695999e+01  -2.9241698e+01   2.5000000e+02  -3.2082398e+00   3.7045177e+00   4.0949858e+00
   2.3837809e+01  -2.9207986e+01   2.5000000e+02  -3.0387222e+00   3.6515506e+00   4.5913262e+00
   2.3978328e+01  -2.9170519e+01   2.5000000e+02  -2.8933412e+00   3.5480611e+00   5.0550216e+00
   2.4117420e+01  -2.9129332e+01   2.5000000e+02  -2.7721482e+00   3.4025701e+00   5.4782574e+00
   2.4254955e+01  -2.9084465e+01   2.5000000e+02  -2.6743962e+00   3.2242334e+00   5.8558420e+00
   2.4390802e+01  -2.9035963e+01   2.5000000e+02  -2.5987999e+00   3.0221622e+00   6.1851001e+00
   2.4524833e+01  -2.8983872e+01   2.5000000e+02  -2.5437728e+00   2.8048500e+00   6.4655893e+00
   2.4656923e+01  -2.8928242e+01   2.5000000e+02  -2.5076112e+00   2.5797540e+00   6.6986569e+00
   2.4786949e+01  -2.8869127e+01   2.5000000e+02  -2.4886292e+00   2.3530667e+00   6.8869215e+00
   2.4914790e+01  -2.8806583e+01   2.5000000e+02  -2.4852381e+00   2.1296620e+00   7.0337572e+00
   2.5040329e+01  -2.8740671e+01   2.5000000e+02  -2.4959654e+00   1.9131753e+00   7.1428412e+00
   2.5163451e+01  -2.8671454e+01   2.5000000e+02  -2.5194601e+00   1.7062057e+00   7.2177915e+00
   2.5837641e+01  -2.8373015e+01   2.5000000e+02  -2.4469834e+00   5.1208642e-01   7.2415038e+00
   2.5944205e+01  -2.8285289e+01   2.5000000e+02  -2.5236523e+00   3.9169901e-01   7.1651433e+00
   2.6047713e+01  -2.8194849e+01   2.5000000e+02  -2.6046523e+00   2.8948061e-01   7.0722143e+00
   2.6148081e+01  -2.8101775e+01   2.5000000e+02  -2.6893378e+00   2.0700987e-01   6.9646700e+00
   2.6245230e+01  -2.8006149e+01   2.5000000e+02  -2.7774703e+00   1.4569766e-01   6.8447588e+00
   2.6339083e+01  -2.7908057e+01   2.5000000e+02  -2.8693225e+00   1.0655103e-01   6.7149346e+00
   2.6429569e+01  -2.7807585e+01   2.5000000e+02  -2.9657312e+00   8.9943949e-02   6.5776394e+00
   2.6516617e+01  -2.7704820e+01   2.5000000e+02  -3.0680626e+00   9.5459407e-02   6.4350064e+00
   2.6600162e+01  -2.7599852e+01   2.5000000e+02  -3.1780461e+00   1.2180222e-01   6.2885226e+00
   2.6680143e+01  -2.7492774e+01   2.5000000e+02  -3.2975135e+00   1.6684442e-01   6.1387335e+00
   2.6756501e+01  -2.7383677e+01   2.5000000e+02  -3.4280642e+00   2.2778715e-01   5.9850478e+00
   2.6829181e+01  -2.7272657e+01   2.5000000e+02  -3.5706654e+00   3.0137963e-01   5.8257206e+00
   2.6898132e+01  -2.7159809e+01   2.5000000e+02  -3.7253165e+00   3.8420403e-01   5.6580111e+00
   2.6963308e+01  -2.7045230e+01   2.5000000e+02  -3.8907937e+00   4.7293874e-01   5.4785268e+00
   2.7024665e+01  -2.6929018e+01   2.5000000e+02  -4.0645646e+00   5.6458620e-01   5.2836842e+00
   2.7082162e+01  -2.6811273e+01   2.5000000e+02  -4.2428729e+00   6.5661992e-01   5.0702155e+00
   2.7135765e+01  -2.6692094e+01   2.5000000e+02  -4.4210014e+00   7.4705572e-01   4.8356253e+00
   2.7185439e+01  -2.6571583e+01   2.5000000e+02  -4.5936611e+00   8.3445962e-01   4.5785359e+00
   2.7231156e+01  -2.6449842e+01   2.5000000e+02  -4.7554413e+00   9.1790122e-01   4.2988672e+00
   2.7272890e+01  -2.6326972e+01   2.5000000e+02  -4.9012627e+00   9.9689298e-01   3.9978428e+00
   2.7310620e+01  -2.6203078e+01   2.5000000e+02  -5.0267508e+00   1.0713055e+00   3.6778793e+00
   2.7344327e+01  -2.6078262e+01   2.5000000e+02  -5.1285337e+00   1.1412959e+00   3.3423395e+00
   2.7373997e+01  -2.5952629e+01   2.5000000e+02  -5.2044061e+00   1.2072132e+00   2.9952786e+00
   2.7399618e+01  -2.5826283e+01   2.5000000e+02  -5.2534089e+00   1.2695109e+00   2.6411445e+00
   2.7421182e+01  -2.5699329e+01   2.5000000e+02  -5.2758160e+00   1.3286451e+00   2.2845130e+00
   2.7438684e+01  -2.5571871e+01   2.5000000e+02  -5.2730665e+00   1.3849805e+00   1.9298263e+00
   2.7452124e+01  -2.5444014e+01   2.5000000e+02  -5.2476485e+00   1.4387042e+00   1.5811633e+00
   2.7461504e+01  -2.5315862e+01   2.5000000e+02  -5.2029512e+00   1.4897691e+00   1.2419992e+00
   2.7466828e+01  -2.5187521e+01   2.5000000e+02  -5.1430751e+00   1.5378588e+00   9.1499106e-01
   2.7468106e+01  -2.5059095e+01   2.5000000e+02  -5.0725917e+00   1.5823784e+00   6.0176444e-01
   2.7465348e+01  -2.4930688e+01   2.5000000e+02  -4.9962545e+00   1.6224598e+00   3.0273756e-01
   2.7458571e+01  -2.4802405e+01   2.5000000e+02  -4.9186514e+00   1.6569652e+00   1.7028559e-02
   2.7447792e+01  -2.4674347e+01   2.5000000e+02  -4.8438166e+00   1.6844906e+00  -2.5757307e-01
   2.7433031e+01  -2.4546619e+01   2.5000000e+02  -4.7748339e+00   1.7033570e+00  -5.2445624e-01
   2.7414313e+01  -2.4419322e+01   2.5000000e+02  -4.7134630e+00   1.7116138e+00  -7.8791563e-01
   2.7391663e+01  -2.4292559e+01   2.5000000e+02  -4.6598644e+00   1.7070643e+00  -1.0527078e+00
   2.7365113e+01  -2.4166431e+01   2.5000000e+02  -4.6124715e+00   1.6873360e+00  -1.3234729e+00
   2.7334694e+01  -2.4041037e+01   2.5000000e+02  -4.5680730e+00   1.6500061e+00  -1.6041160e+00
   2.7300442e+01  -2.3916477e+01   2.5000000e+02  -4.5221351e+00   1.5927831e+00  -1.8971883e+00
   2.7262393e+01  -2.3792850e+01   2.5000000e+02  -4.4693408e+00   1.5137241e+00  -2.2034480e+00
   2.7220590e+01  -2.3670253e+01   2.5000000e+02  -4.4042872e+00   1.4114527e+00  -2.5216458e+00
   2.7175073e+01  -2.3548782e+01   2.5000000e+02  -4.3222090e+00   1.2853334e+00  -2.8486591e+00
   2.7125890e+01  -2.3428533e+01   2.5000000e+02  -4.2196079e+00   1.1355659e+00  -3.1798848e+00
   2.7073088e+01  -2.3309600e+01   2.5000000e+02  -4.0946333e+00   9.6316073e-01  -3.5099033e+00
   2.7016717e+01  -2.3192075e+01   2.5000000e+02  -3.9471632e+00   7.6980466e-01  -3.8331864e+00
   2.6956831e+01  -2.3076050e+01   2.5000000e+02  -3.7785800e+00   5.5763878e-01  -4.1447207e+00
   2.6893483e+01  -2.2961615e+01   2.5000000e+02  -3.5913077e+00   3.2898361e-01  -4.4404267e+00
   2.6826733e+01  -2.2848859e+01   2.5000000e+02  -3.3882710e+00   8.6085332e-02  -4.7172571e+00
   2.6756638e+01  -2.2737870e+01   2.5000000e+02  -3.1723691e+00  -1.6908645e-01  -4.9730459e+00
   2.6683260e+01  -2.2628732e+01   2.5000000e+02  -2.9461264e+00  -4.3493711e-01  -5.2061389e+00
   2.6606664e+01  -2.2521530e+01   2.5000000e+02  -2.7115444e+00  -7.1022264e-01  -5.4149560e+00
   2.6526914e+01  -2.2416347e+01   2.5000000e+02  -2.4701439e+00  -9.9394116e-01  -5.5976215e+00
   2.6444079e+01  -2.2313262e+01   2.5000000e+02  -2.2231762e+00  -1.2851433e+00  -5.7517366e+00
   2.6358228e+01  -2.2212356e+01   2.5000000e+02  -1.9718889e+00  -1.5827115e+00  -5.8743491e+00
   2.6269433e+01  -2.2113705e+01   2.5000000e+02  -1.7177817e+00  -1.8851751e+00  -5.9621248e+00
   2.6177765e+01  -2.2017385e+01   2.5000000e+02  -1.4627884e+00  -2.1905672e+00  -6.0116434e+00
   2.6083302e+01  -2.1923469e+01   2.5000000e+02  -1.2093709e+00  -2.4963540e+00  -6.0197718e+00
   2.5986118e+01  -2.1832028e+01   2.5000000e+02  -9.6048592e-01  -2.7994606e+00  -5.9840215e+00
   2.5886293e+01  -2.1743133e+01   2.5000000e+02  -7.1951491e-01  -3.0963299e+00  -5.9028605e+00
   2.5783907e+01  -2.1656850e+01   2.5000000e+02  -4.9011754e-01  -3.3830639e+00  -5.7759413e+00
   2.5679040e+01  -2.1573246e+01   2.5000000e+02  -2.7609186e-01  -3.6555713e+00  -5.6042492e+00
   2.5571775e+01  -2.1492382e+01   2.5000000e+02  -8.1225949e-02  -3.9097567e+00  -5.3901962e+00
   2.5462197e+01  -2.1414322e+01   2.5000000e+02   9.0840162e-02  -4.1417227e+00  -5.1376588e+00
   2.5350392e+01  -2.1339122e+01   2.5000000e+02   2.3677238e-01  -4.3480317e+00  -4.8519601e+00
   2.5236446e+01  -2.1266841e+01   2.5000000e+02   3.5369347e-01  -4.5259752e+00  -4.5397875e+00
   2.5120447e+01  -2.1197533e+01   2.5000000e+02   4.3935622e-01  -4.6738827e+00  -4.2090131e+00
   2.5002485e+01  -2.1131250e+01   2.5000000e+02   4.9231153e-01  -4.7914122e+00  -3.8683884e+00
   2.4882651e+01  -2.1068041e+01   2.5000000e+02   5.1205679e-01  -4.8797885e+00  -3.5270942e+00
   2.4761035e+01  -2.1007955e+01   2.5000000e+02   4.9913279e-01  -4.9419307e+00  -3.1941684e+00
   2.4637732e+01  -2.0951037e+01   2.5000000e+02   4.5514420e-01  -4.9824202e+00  -2.8778701e+00
   2.4512833e+01  -2.0897328e+01   2.5000000e+02   3.8268560e-01  -5.0072936e+00  -2.5850121e+00
   2.4386435e+01  -2.0846871e+01   2.5000000e+02   2.8518343e-01  -5.0236576e+00  -2.3204270e+00
   2.4258631e+01  -2.0799701e+01   2.5000000e+02   1.6665085e-01  -5.0391734e+00  -2.0865452e+00
   2.4129519e+01  -2.0755855e+01   2.5000000e+02   3.1421176e-02  -5.0614762e+00  -1.8832418e+00
   2.3999195e+01  -2.0715366e+01   2.5000000e+02  -1.1613976e-01  -5.0976020e+00  -1.7078766e+00
   2.3867758e+01  -2.0678263e+01   2.5000000e+02  -2.7187827e-01  -5.1534902e+00  -1.5555669e+00
   2.3735304e+01  -2.0644575e+01   2.5000000e+02  -4.3204432e-01  -5.2336217e+00  -1.4195969e+00
   2.3601934e+01  -2.0614326e+01   2.5000000e+02  -5.9341071e-01  -5.3407804e+00  -1.2919318e+00
   2.3467746e+01  -2.0587540e+01   2.5000000e+02  -7.5333006e-01  -5.4759715e+00  -1.1637363e+00
   2.3332841e+01  -2.0564237e+01   2.5000000e+02  -9.0973123e-01  -5.6384270e+00  -1.0258928e+00
   2.3197319e+01  -2.0544433e+01   2.5000000e+02  -1.0610787e+00  -5.8257064e+00  -8.6946175e-01
   2.3061279e+01  -2.0528143e+01   2.5000000e+02  -1.2062966e+00  -6.0338533e+00  -6.8608794e-01
   2.2924824e+01  -2.0515380e+01   2.5000000e+02  -1.3446744e+00  -6.2575782e+00  -4.6835990e-01
   2.2788054e+01  -2.0506154e+01   2.5000000e+02  -1.4757738e+00  -6.4904942e+00  -2.1009611e-01
   2.2651071e+01  -2.0500470e+01   2.5000000e+02  -1.5993200e+00  -6.7253575e+00   9.3408577e-02
   2.2513977e+01  -2.0498334e+01   2.5000000e+02  -1.7150973e+00  -6.9543455e+00   4.4522519e-01
   2.2376871e+01  -2.0499747e+01   2.5000000e+02  -1.8228643e+00  -7.1693327e+00   8.4668515e-01
   2.2239857e+01  -2.0504707e+01   2.5000000e+02  -1.9222745e+00  -7.3621543e+00   1.2973159e+00
   2.2103036e+01  -2.0513212e+01   2.5000000e+02  -2.0128372e+00  -7.5248914e+00   1.7948738e+00
   2.1966508e+01  -2.0525255e+01   2.5000000e+02  -2.0939092e+00  -7.6501304e+00   2.3353767e+00
   2.1830376e+01  -2.0540826e+01   2.5000000e+02  -2.1647135e+00  -7.7312396e+00   2.9131745e+00
   2.1694740e+01  -2.0559915e+01   2.5000000e+02  -2.2243912e+00  -7.7626728e+00   3.5211103e+00
   2.1559701e+01  -2.0582506e+01   2.5000000e+02  -2.2720675e+00  -7.7402748e+00   4.1506917e+00
   2.1425359e+01  -2.0608584e+01   2.5000000e+02  -2.3069111e+00  -7.6615955e+00   4.7924081e+00
   2.1291814e+01  -2.0638128e+01   2.5000000e+02  -2.3281870e+00  -7.5261491e+00   5.4361109e+00
   2.1159165e+01  -2.0671117e+01   2.5000000e+02  -2.3352685e+00  -7.3355801e+00   6.0715326e+00
   2.1027513e+01  -2.0707526e+01   2.5000000e+02  -2.3276202e+00  -7.0936766e+00   6.6888296e+00
   2.0896954e+01  -2.0747327e+01   2.5000000e+02  -2.3047459e+00  -6.8061781e+00   7.2791795e+00
   2.0767587e+01  -2.0790492e+01   2.5000000e+02  -2.2661051e+00  -6.4804158e+00   7.8352442e+00
   2.0639509e+01  -2.0836986e+01   2.5000000e+02  -2.2110492e+00  -6.1247613e+00   8.3515132e+00
   2.0512816e+01  -2.0886777e+01   2.5000000e+02  -2.1387555e+00  -5.7479941e+00   8.8244573e+00
   2.0387604e+01  -2.0939826e+01   2.5000000e+02  -2.0482453e+00  -5.3586566e+00   9.2524201e+00
   2.0263968e+01  -2.0996093e+01   2.5000000e+02  -1.9384409e+00  -4.9644884e+00   9.6353606e+00
   2.0142001e+01  -2.1055537e+01   2.5000000e+02  -1.8082955e+00  -4.5720159e+00   9.9744497e+00
   2.0021796e+01  -2.1118113e+01   2.5000000e+02  -1.6569721e+00  -4.1863470e+00   1.0271607e+01
   1.9903445e+01  -2.1183773e+01   2.5000000e+02  -1.4840267e+00  -3.8111560e+00   1.0529087e+01
   1.9787039e+01  -2.1252469e+01   2.5000000e+02  -1.2895560e+00  -3.4488325e+00   1.0749160e+01
   1.9672667e+01  -2.1324148e+01   2.5000000e+02  -1.0743053e+00  -3.1007336e+00   1.0933900e+01
   1.9560418e+01  -2.1398757e+01   2.5000000e+02  -8.3967302e-01  -2.7674844e+00   1.1085110e+01
   1.9450379e+01  -2.1476239e+01   2.5000000e+02  -5.8765887e-01  -2.4492532e+00   1.1204327e+01
   1.9342636e+01  -2.1556536e+01   2.5000000e+02  -3.2073048e-01  -2.1459824e+00   1.1292886e+01
   1.9237273e+01  -2.1639587e+01   2.5000000e+02  -4.1667568e-02  -1.8575469e+00   1.1351993e+01
   1.9134374e+01  -2.1725329e+01   2.5000000e+02   2.4660840e-01  -1.5838530e+00   1.1382793e+01
   1.9034020e+01  -2.1813697e+01   2.5000000e+02   5.4118385e-01  -1.3248690e+00   1.1386400e+01
   1.8936292e+01  -2.1904624e+01   2.5000000e+02   8.3926468e-01  -1.0806323e+00   1.1363908e+01
   1.8841268e+01  -2.1998041e+01   2.5000000e+02   1.1382457e+00  -8.5121804e-01   1.1316377e+01
   1.8749024e+01  -2.2093877e+01   2.5000000e+02   1.4357365e+00  -6.3670713e-01   1.1244807e+01
   1.8659637e+01  -2.2192059e+01   2.5000000e+02   1.7295511e+00  -4.3715926e-01   1.1150108e+01
   1.8573180e+01  -2.2292512e+01   2.5000000e+02   2.0176716e+00  -2.5257819e-01   1.1033075e+01
   1.8489724e+01  -2.2395159e+01   2.5000000e+02   2.2981939e+00  -8.2908941e-02   1.0894373e+01
   1.8409340e+01  -2.2499921e+01   2.5000000e+02   2.5692669e+00   7.1945372e-02   1.0734547e+01
   1.8332096e+01  -2.2606718e+01   2.5000000e+02   2.8290405e+00   2.1209836e-01   1.0554057e+01
   1.8258057e+01  -2.2715467e+01   2.5000000e+02   3.0756249e+00   3.3763793e-01   1.0353354e+01
   1.8187288e+01  -2.2826087e+01   2.5000000e+02   3.3071011e+00   4.4857541e-01   1.0132967e+01
   1.8119850e+01  -2.2938489e+01   2.5000000e+02   3.5215367e+00   5.4482779e-01   9.8936331e+00
   1.8055804e+01  -2.3052589e+01   2.5000000e+02   3.7171026e+00   6.2619842e-01   9.6363826e+00
   1.7995208e+01  -2.3168297e+01   2.5000000e+02   3.8921685e+00   6.9241360e-01   9.3626208e+00
   1.7938116e+01  -2.3285523e+01   2.5000000e+02   4.0454509e+00   7.4317740e-01   9.0741261e+00
   1.7884582e+01  -2.3404177e+01   2.5000000e+02   4.1761357e+00   7.7823744e-01   8.7729834e+00
   1.7834657e+01  -2.3524166e+01   2.5000000e+02   4.2839439e+00   7.9747620e-01   8.4614519e+00
   1.7788390e+01  -2.3645395e+01   2.5000000e+02   4.3691313e+00   8.0097929e-01   8.1417782e+00
   1.7745825e+01  -2.3767771e+01   2.5000000e+02   4.4323951e+00   7.8908400e-01   7.8159920e+00
   1.7707008e+01  -2.3891196e+01   2.5000000e+02   4.4746952e+00   7.6237596e-01   7.4857719e+00
   1.7671979e+01  -2.4015573e+01   2.5000000e+02   4.4970197e+00   7.2167451e-01   7.1523513e+00
   1.7640775e+01  -2.4140805e+01   2.5000000e+02   4.5001418e+00   6.6796455e-01   6.8165554e+00
   1.7613434e+01  -2.4266792e+01   2.5000000e+02   4.4844228e+00   6.0230934e-01   6.4789503e+00
   1.7589987e+01  -2.4393434e+01   2.5000000e+02   4.4496953e+00   5.2578982e-01   6.1400578e+00
   1.7570465e+01  -2.4520629e+01   2.5000000e+02   4.3952841e+00   4.3942322e-01   5.8006236e+00
   1.7554895e+01  -2.4648278e+01   2.5000000e+02   4.3201403e+00   3.4413366e-01   5.4618405e+00
   1.7543302e+01  -2.4776277e+01   2.5000000e+02   4.2230885e+00   2.4075380e-01   5.1255286e+00
   1.7535707e+01  -2.4904523e+01   2.5000000e+02   4.1031237e+00   1.3005321e-01   4.7941589e+00
   1.7532129e+01  -2.5032913e+01   2.5000000e+02   3.9597095e+00   1.2783328e-02   4.4707662e+00
   1.7532583e+01  -2.5161344e+01   2.5000000e+02   3.7930172e+00  -1.1026151e-01   4.1587471e+00
   1.7537082e+01  -2.5289710e+01   2.5000000e+02   3.6040787e+00  -2.3820315e-01   3.8615905e+00
   1.7545634e+01  -2.5417909e+01   2.5000000e+02   3.3948128e+00  -3.7005687e-01   3.5825600e+00
   1.7558246e+01  -2.5545834e+01   2.5000000e+02   3.1679801e+00  -5.0474706e-01   3.3244314e+00
   1.7574920e+01  -2.5673382e+01   2.5000000e+02   2.9270250e+00  -6.4114476e-01   3.0892398e+00
   1.7595657e+01  -2.5800448e+01   2.5000000e+02   2.6758949e+00  -7.7813903e-01   2.8781230e+00
   1.7620451e+01  -2.5926927e+01   2.5000000e+02   2.4188103e+00  -9.1469157e-01   2.6912161e+00
   1.7649296e+01  -2.6052713e+01   2.5000000e+02   2.1600284e+00  -1.0499181e+00   2.5276121e+00
   1.7682181e+01  -2.6177704e+01   2.5000000e+02   1.9035793e+00  -1.1831095e+00   2.3853822e+00
   1.7719093e+01  -2.6301795e+01   2.5000000e+02   1.6530275e+00  -1.3137377e+00   2.2616718e+00
   1.7760012e+01  -2.6424881e+01   2.5000000e+02   1.4112205e+00  -1.4414079e+00   2.1528565e+00
   1.7804919e+01  -2.6546861e+01   2.5000000e+02   1.1800661e+00  -1.5658194e+00   2.0547610e+00
   1.7853789e+01  -2.6667631e+01   2.5000000e+02   9.6038470e-01  -1.6866706e+00   1.9629540e+00
   1.7906593e+01  -2.6787090e+01   2.5000000e+02   7.5181634e-01  -1.8035933e+00   1.8730668e+00
   1.7963299e+01  -2.6905135e+01   2.5000000e+02   5.5284428e-01  -1.9160994e+00   1.7811248e+00
   1.8023872e+01  -2.7021668e+01   2.5000000e+02   3.6090039e-01  -2.0235452e+00   1.6838483e+00
   1.8088273e+01  -2.7136588e+01   2.5000000e+02   1.7258678e-01  -2.1251213e+00   1.5788991e+00
   1.8156458e+01  -2.7249797e+01   2.5000000e+02  -1.6052264e-02  -2.2198634e+00   1.4650449e+00
   1.8228383e+01  -2.7361197e+01   2.5000000e+02  -2.0920393e-01  -2.3066997e+00   1.3422317e+00
   1.8303995e+01  -2.7470694e+01   2.5000000e+02  -4.1094571e-01  -2.3844826e+00   1.2115835e+00
   1.8383241e+01  -2.7578191e+01   2.5000000e+02  -6.2490785e-01  -2.4520864e+00   1.0753084e+00
   1.8466065e+01  -2.7683597e+01   2.5000000e+02  -8.5398006e-01  -2.5084808e+00   9.3654156e-01
   1.8552404e+01  -2.7786818e+01   2.5000000e+02  -1.1000384e+00  -2.5528321e+00   7.9913552e-01
   1.8642194e+01  -2.7887765e+01   2.5000000e+02  -1.3637714e+00  -2.5846106e+00   6.6737423e-01
   1.8735367e+01  -2.7986350e+01   2.5000000e+02  -1.6445664e+00  -2.6036829e+00   5.4565439e-01
   1.8831850e+01  -2.8082485e+01   2.5000000e+02  -1.9405011e+00  -2.6103797e+00   4.3812818e-01
   1.8931569e+01  -2.8176085e+01   2.5000000e+02  -2.2484608e+00  -2.6055219e+00   3.4832992e-01
   1.9034443e+01  -2.8267069e+01   2.5000000e+02  -2.5643509e+00  -2.5903736e+00   2.7884542e-01
   1.9140391e+01  -2.8355355e+01   2.5000000e+02  -2.8834105e+00  -2.5665557e+00   2.3102279e-01
   1.9249326e+01  -2.8440864e+01   2.5000000e+02  -3.2005873e+00  -2.5358642e+00   2.0481540e-01
   1.9361160e+01  -2.8523521e+01   2.5000000e+02  -3.5109421e+00  -2.5000579e+00   1.9874816e-01
   1.9475799e+01  -2.8603251e+01   2.5000000e+02  -3.8099971e+00  -2.4606237e+00   2.1003988e-01
   1.9593148e+01  -2.8679982e+01   2.5000000e+02  -4.0940335e+00  -2.4185552e+00   2.3486344e-01
   1.9713108e+01  -2.8753646e+01   2.5000000e+02  -4.3602582e+00  -2.3741787e+00   2.6872535e-01
   1.9835577e+01  -2.8824176e+01   2.5000000e+02  -4.6068421e+00  -2.3270700e+00   3.0688474e-01
   1.9960450e+01  -2.8891508e+01   2.5000000e+02  -4.8328393e+00  -2.2760554e+00   3.4478232e-01
   2.0087619e+01  -2.8955581e+01   2.5000000e+02  -5.0380063e+00  -2.2193062e+00   3.7840567e-01
   2.0216974e+01  -2.9016337e+01   2.5000000e+02  -5.2225600e+00  -2.1544996e+00   4.0455256e-01
   2.0348402e+01  -2.9073720e+01   2.5000000e+02  -5.3869175e+00  -2.0790127e+00   4.2097589e-01
   2.0481786e+01  -2.9127678e+01   2.5000000e+02  -5.5314563e+00  -1.9901079e+00   4.2643027e-01
   2.0617009e+01  -2.9178162e+01   2.5000000e+02  -5.6563273e+00  -1.8850830e+00   4.2061940e-01
   2.0753950e+01  -2.9225125e+01   2.5000000e+02  -5.7613232e+00  -1.7613644e+00   4.0411740e-01
   2.0892486e+01  -2.9268524e+01   2.5000000e+02  -5.8458207e+00  -1.6165410e+00   3.7830264e-01
   2.1032494e+01  -2.9308319e+01   2.5000000e+02  -5.9087837e+00  -1.4483644e+00   3.4532788e-01
   2.1173847e+01  -2.9344474e+01   2.5000000e+02  -5.9488163e+00  -1.2547597e+00   3.0817678e-01
   2.1316416e+01  -2.9376955e+01   2.5000000e+02  -5.9642650e+00  -1.0338899e+00   2.7075786e-01
   2.1460072e+01  -2.9405732e+01   2.5000000e+02  -5.9533538e+00  -7.8431449e-01   2.3803807e-01
   2.1604683e+01  -2.9430779e+01   2.5000000e+02  -5.9143493e+00  -5.0527914e-01   2.1612901e-01
   2.1750119e+01  -2.9452072e+01   2.5000000e+02  -5.8457553e+00  -1.9709484e-01   2.1223299e-01
   2.1896245e+01  -2.9469592e+01   2.5000000e+02  -5.7465306e+00   1.3840872e-01   2.3443383e-01
   2.2042927e+01  -2.9483322e+01   2.5000000e+02  -5.6163216e+00   4.9749800e-01   2.9122575e-01
   2.2190030e+01  -2.9493249e+01   2.5000000e+02  -5.4556885e+00   8.7427522e-01   3.9086415e-01
   2.2337419e+01  -2.9499366e+01   2.5000000e+02  -5.2662944e+00   1.2606544e+00   5.4057169e-01
   2.2484958e+01  -2.9501665e+01   2.5000000e+02  -5.0510323e+00   1.6466318e+00   7.4567589e-01
   2.2632511e+01  -2.9500144e+01   2.5000000e+02  -4.8140323e+00   2.0208303e+00   1.0088992e+00
   2.2779941e+01  -2.9494806e+01   2.5000000e+02  -4.5605463e+00   2.3712797e+00   1.3298275e+00
   2.2927114e+01  -2.9485655e+01   2.5000000e+02  -4.2966939e+00   2.6863480e+00   1.7046885e+00
   2.3073893e+01  -2.9472699e+01   2.5000000e+02  -4.0291068e+00   2.9556467e+00   2.1264713e+00
   2.3220143e+01  -2.9455950e+01   2.5000000e+02  -3.7644884e+00   3.1708548e+00   2.5853859e+00
   2.3365730e+01  -2.9435425e+01   2.5000000e+02  -3.5091708e+00   3.3263182e+00   3.0695762e+00
   2.3510521e+01  -2.9411142e+01   2.5000000e+02  -3.2687258e+00   3.4193979e+00   3.5659975e+00
   2.3654382e+01  -2.9383123e+01   2.5000000e+02  -3.0476676e+00   3.4505180e+00   4.0613668e+00
   2.3797183e+01  -2.9351395e+01   2.5000000e+02  -2.8492727e+00   3.4229485e+00   4.5430982e+00
   2.3938794e+01  -2.9315986e+01   2.5000000e+02  -2.6755604e+00   3.3423693e+00   5.0000761e+00
   2.4079086e+01  -2.9276930e+01   2.5000000e+02  -2.5273721e+00   3.2162508e+00   5.4232588e+00
   2.4217933e+01  -2.9234263e+01   2.5000000e+02  -2.4045570e+00   3.0531575e+00   5.8060363e+00
   2.4355209e+01  -2.9188023e+01   2.5000000e+02  -2.3062128e+00   2.8620379e+00   6.1443173e+00
   2.4490792e+01  -2.9138253e+01   2.5000000e+02  -2.2309221e+00   2.6515646e+00   6.4363939e+00
   2.4624561e+01  -2.9085000e+01   2.5000000e+02  -2.1769836e+00   2.4296225e+00   6.6825889e+00
   2.4756397e+01  -2.9028311e+01   2.5000000e+02  -2.1425982e+00   2.2029637e+00   6.8847868e+00
   2.4886184e+01  -2.8968238e+01   2.5000000e+02  -2.1259781e+00   1.9770327e+00   7.0459128e+00
   2.5013808e+01  -2.8904837e+01   2.5000000e+02  -2.1254152e+00   1.7559736e+00   7.1694296e+00
   2.5139158e+01  -2.8838164e+01   2.5000000e+02  -2.1393127e+00   1.5427735e+00   7.2589145e+00
   2.5262125e+01  -2.8768281e+01   2.5000000e+02  -2.1661665e+00   1.3394868e+00   7.3177478e+00
   2.5382605e+01  -2.8695251e+01   2.5000000e+02  -2.2045554e+00   1.1475073e+00   7.3489216e+00
   2.5500495e+01  -2.8619139e+01   2.5000000e+02  -2.2531234e+00   9.6785305e-01   7.3549609e+00
   2.5615694e+01  -2.8540015e+01   2.5000000e+02  -2.3105552e+00   8.0140675e-01   7.3379469e+00
   2.5728107e+01  -2.8457949e+01   2.5000000e+02  -2.3755803e+00   6.4910868e-01   7.2996140e+00
   2.6355445e+01  -2.8089973e+01   2.5000000e+02  -2.4560859e+00  -1.9157924e-01   6.8431771e+00
   2.6449408e+01  -2.7991713e+01   2.5000000e+02  -2.5439931e+00  -2.2585026e-01   6.7176370e+00
   2.6540080e+01  -2.7891132e+01   2.5000000e+02  -2.6358170e+00  -2.3657450e-01   6.5874974e+00
   2.6627397e+01  -2.7788315e+01   2.5000000e+02  -2.7332801e+00  -2.2409563e-01   6.4552659e+00
   2.6711295e+01  -2.7683346e+01   2.5000000e+02  -2.8385794e+00  -1.8970181e-01   6.3227393e+00
   2.6791717e+01  -2.7576312e+01   2.5000000e+02  -2.9540887e+00  -1.3560144e-01   6.1906581e+00
   2.6868606e+01  -2.7467302e+01   2.5000000e+02  -3.0819986e+00  -6.4750764e-02   6.0584817e+00
   2.6941911e+01  -2.7356404e+01   2.5000000e+02  -3.2239008e+00   1.9392311e-02   5.9243263e+00
   2.7011584e+01  -2.7243711e+01   2.5000000e+02  -3.3803904e+00   1.1316102e-01   5.7851167e+00
   2.7077579e+01  -2.7129314e+01   2.5000000e+02  -3.5507878e+00   2.1298756e-01   5.6369151e+00
   2.7139855e+01  -2.7013306e+01   2.5000000e+02  -3.7329833e+00   3.1564114e-01   5.4754016e+00
   2.7198373e+01  -2.6895781e+01   2.5000000e+02  -3.9234823e+00   4.1840512e-01   5.2964140e+00
   2.7253098e+01  -2.6776834e+01   2.5000000e+02  -4.1176233e+00   5.1916156e-01   5.0964645e+00
   2.7303999e+01  -2.6656561e+01   2.5000000e+02  -4.3099425e+00   6.1640331e-01   4.8731547e+00
   2.7351048e+01  -2.6535059e+01   2.5000000e+02  -4.4946265e+00   7.0919391e-01   4.6254339e+00
   2.7394220e+01  -2.6412423e+01   2.5000000e+02  -4.6659887e+00   7.9709952e-01   4.3536809e+00
   2.7433492e+01  -2.6288753e+01   2.5000000e+02  -4.8188874e+00   8.8009766e-01   4.0596532e+00
   2.7468848e+01  -2.6164146e+01   2.5000000e+02  -4.9490845e+00   9.5849031e-01   3.7462864e+00
   2.7500273e+01  -2.6038700e+01   2.5000000e+02  -5.0534876e+00   1.0328075e+00   3.4174373e+00
   2.7527753e+01  -2.5912516e+01   2.5000000e+02  -5.1302866e+00   1.1036983e+00   3.0775919e+00
   2.7551281e+01  -2.5785691e+01   2.5000000e+02  -5.1789990e+00   1.1718152e+00   2.7315495e+00
   2.7570851e+01  -2.5658325e+01   2.5000000e+02  -5.2004314e+00   1.2376977e+00   2.3841438e+00
   2.7586461e+01  -2.5530518e+01   2.5000000e+02  -5.1965846e+00   1.3016683e+00   2.0399647e+00
   2.7598111e+01  -2.5402369e+01   2.5000000e+02  -5.1705121e+00   1.3637585e+00   1.7030982e+00
   2.7605805e+01  -2.5273977e+01   2.5000000e+02  -5.1261361e+00   1.4236667e+00   1.3768974e+00
   2.7609551e+01  -2.5145441e+01   2.5000000e+02  -5.0680282e+00   1.4807566e+00   1.0637659e+00
   2.7609357e+01  -2.5016861e+01   2.5000000e+02  -5.0011513e+00   1.5340853e+00   7.6496467e-01
   2.7605236e+01  -2.4888335e+01   2.5000000e+02  -4.9305476e+00   1.5824406e+00   4.8046678e-01
   2.7597204e+01  -2.4759962e+01   2.5000000e+02  -4.8609884e+00   1.6243784e+00   2.0888387e-01
   2.7585278e+01  -2.4631839e+01   2.5000000e+02  -4.7965834e+00   1.6582495e+00  -5.2524012e-02
   2.7569480e+01  -2.4504064e+01   2.5000000e+02  -4.7403791e+00   1.6822101e+00  -3.0768192e-01
   2.7549834e+01  -2.4376734e+01   2.5000000e+02  -4.6939882e+00   1.6942360e+00  -5.6140214e-01
   2.7526364e+01  -2.4249945e+01   2.5000000e+02  -4.6573082e+00   1.6921524e+00  -8.1892006e-01
   2.7499101e+01  -2.4123793e+01   2.5000000e+02  -4.6283989e+00   1.6736980e+00  -1.0852743e+00
   2.7468076e+01  -2.3998372e+01   2.5000000e+02  -4.6035777e+00   1.6366419e+00  -1.3646577e+00
   2.7433323e+01  -2.3873777e+01   2.5000000e+02  -4.5777664e+00   1.5789485e+00  -1.6597749e+00
   2.7394878e+01  -2.3750101e+01   2.5000000e+02  -4.5450713e+00   1.4989769e+00  -1.9713789e+00
   2.7352780e+01  -2.3627436e+01   2.5000000e+02  -4.4995246e+00   1.3956807e+00  -2.2980689e+00
   2.7307070e+01  -2.3505874e+01   2.5000000e+02  -4.4358582e+00   1.2687697e+00  -2.6364284e+00
   2.7257792e+01  -2.3385504e+01   2.5000000e+02  -4.3501608e+00   1.1187848e+00  -2.9814916e+00
   2.7204991e+01  -2.3266416e+01   2.5000000e+02  -4.2402819e+00   9.4707028e-01  -3.3274352e+00
   2.7148715e+01  -2.3148697e+01   2.5000000e+02  -4.1059125e+00   7.5562389e-01  -3.6683515e+00
   2.7089014e+01  -2.3032435e+01   2.5000000e+02  -3.9483431e+00   5.4686423e-01  -3.9989159e+00
   2.7025940e+01  -2.2917715e+01   2.5000000e+02  -3.7699860e+00   3.2333880e-01  -4.3148265e+00
   2.6959549e+01  -2.2804620e+01   2.5000000e+02  -3.5738021e+00   8.7446652e-02  -4.6129203e+00
   2.6889895e+01  -2.2693235e+01   2.5000000e+02  -3.3627636e+00  -1.5877665e-01  -4.8910004e+00
   2.6817037e+01  -2.2583640e+01   2.5000000e+02  -3.1394859e+00  -4.1378863e-01  -5.1474528e+00
   2.6741035e+01  -2.2475915e+01   2.5000000e+02  -2.9060631e+00  -6.7653577e-01  -5.3807782e+00
   2.6661951e+01  -2.2370139e+01   2.5000000e+02  -2.6641129e+00  -9.4634569e-01  -5.5891756e+00
   2.6579849e+01  -2.2266389e+01   2.5000000e+02  -2.4149722e+00  -1.2227348e+00  -5.7702791e+00
   2.6494794e+01  -2.2164739e+01   2.5000000e+02  -2.1599595e+00  -1.5051736e+00  -5.9210949e+00
   2.6406854e+01  -2.2065263e+01   2.5000000e+02  -1.9006384e+00  -1.7928441e+00  -6.0381313e+00
   2.6316096e+01  -2.1968034e+01   2.5000000e+02  -1.6389966e+00  -2.0844569e+00  -6.1176874e+00
   2.6222593e+01  -2.1873121e+01   2.5000000e+02  -1.3775407e+00  -2.3781288e+00  -6.1562237e+00
   2.6126416e+01  -2.1780593e+01   2.5000000e+02  -1.1192772e+00  -2.6713496e+00  -6.1507314e+00
   2.6027637e+01  -2.1690516e+01   2.5000000e+02  -8.6762836e-01  -2.9610222e+00  -6.0990617e+00
   2.5926334e+01  -2.1602955e+01   2.5000000e+02  -6.2631504e-01  -3.2435486e+00  -6.0001824e+00
   2.5822581e+01  -2.1517973e+01   2.5000000e+02  -3.9919951e-01  -3.5149862e+00  -5.8543402e+00
   2.5716457e+01  -2.1435631e+01   2.5000000e+02  -1.9016094e-01  -3.7712024e+00  -5.6631798e+00
   2.5608040e+01  -2.1355988e+01   2.5000000e+02  -2.9562202e-03  -4.0080787e+00  -5.4297958e+00
   2.5497412e+01  -2.1279101e+01   2.5000000e+02   1.5890643e-01  -4.2217298e+00  -5.1587637e+00
   2.5384653e+01  -2.1205024e+01   2.5000000e+02   2.9231739e-01  -4.4087756e+00  -4.8560990e+00
   2.5269847e+01  -2.1133811e+01   2.5000000e+02   3.9471871e-01  -4.5666282e+00  -4.5291714e+00
   2.5153077e+01  -2.1065512e+01   2.5000000e+02   4.6428394e-01  -4.6938149e+00  -4.1864821e+00
   2.5034429e+01  -2.1000176e+01   2.5000000e+02   5.0008148e-01  -4.7902668e+00  -3.8373304e+00
   2.4913988e+01  -2.0937849e+01   2.5000000e+02   5.0221098e-01  -4.8575478e+00  -3.4913145e+00
   2.4791842e+01  -2.0878576e+01   2.5000000e+02   4.7187169e-01  -4.8989535e+00  -3.1577369e+00
   2.4668078e+01  -2.0822399e+01   2.5000000e+02   4.1134253e-01  -4.9194505e+00  -2.8449261e+00
   2.4542785e+01  -2.0769358e+01   2.5000000e+02   3.2386155e-01  -4.9254288e+00  -2.5595967e+00
   2.4416053e+01  -2.0719489e+01   2.5000000e+02   2.1341220e-01  -4.9242878e+00  -2.3063068e+00
   2.4287972e+01  -2.0672830e+01   2.5000000e+02   8.4447304e-02  -4.9239066e+00  -2.0871032e+00
   2.4158634e+01  -2.0629412e+01   2.5000000e+02  -5.8422840e-02  -4.9320506e+00  -1.9013911e+00
   2.4028130e+01  -2.0589266e+01   2.5000000e+02  -2.1072287e-01  -4.9558142e+00  -1.7460378e+00
   2.3896552e+01  -2.0552422e+01   2.5000000e+02  -3.6835774e-01  -5.0011447e+00  -1.6156777e+00
   2.3763993e+01  -2.0518904e+01   2.5000000e+02  -5.2779328e-01  -5.0724892e+00  -1.5031583e+00
   2.3630548e+01  -2.0488737e+01   2.5000000e+02  -6.8614629e-01  -5.1725942e+00  -1.4000586e+00
   2.3496310e+01  -2.0461942e+01   2.5000000e+02  -8.4121826e-01  -5.3024262e+00  -1.2972191e+00
   2.3361374e+01  -2.0438538e+01   2.5000000e+02  -9.9145611e-01  -5.4611960e+00  -1.1852499e+00
   2.3225834e+01  -2.0418541e+01   2.5000000e+02  -1.1358808e+00  -5.6464602e+00  -1.0549820e+00
   2.3089785e+01  -2.0401965e+01   2.5000000e+02  -1.2739827e+00  -5.8542717e+00  -8.9786583e-01
   2.2953324e+01  -2.0388823e+01   2.5000000e+02  -1.4056034e+00  -6.0793687e+00  -7.0631126e-01
   2.2816545e+01  -2.0379124e+01   2.5000000e+02  -1.5308184e+00  -6.3154014e+00  -4.7396631e-01
   2.2679544e+01  -2.0372873e+01   2.5000000e+02  -1.6498072e+00  -6.5551715e+00  -1.9594605e-01
   2.2542418e+01  -2.0370077e+01   2.5000000e+02  -1.7627335e+00  -6.7909031e+00   1.3102209e-01
   2.2405262e+01  -2.0370736e+01   2.5000000e+02  -1.8696500e+00  -7.0145080e+00   5.0850029e-01
   2.2268172e+01  -2.0374850e+01   2.5000000e+02  -1.9704155e+00  -7.2178477e+00   9.3631450e-01
   2.2131245e+01  -2.0382417e+01   2.5000000e+02  -2.0646534e+00  -7.3929812e+00   1.4125631e+00
   2.1994576e+01  -2.0393431e+01   2.5000000e+02  -2.1517520e+00  -7.5324086e+00   1.9336662e+00
   2.1858260e+01  -2.0407884e+01   2.5000000e+02  -2.2308969e+00  -7.6293186e+00   2.4944322e+00
   2.1722394e+01  -2.0425766e+01   2.5000000e+02  -2.3011362e+00  -7.6778596e+00   3.0881485e+00
   2.1587073e+01  -2.0447065e+01   2.5000000e+02  -2.3614662e+00  -7.6734440e+00   3.7067511e+00
   2.1452392e+01  -2.0471765e+01   2.5000000e+02  -2.4109153e+00  -7.6130623e+00   4.3410506e+00
   2.1318446e+01  -2.0499849e+01   2.5000000e+02  -2.4486099e+00  -7.4955835e+00   4.9810875e+00
   2.1185328e+01  -2.0531297e+01   2.5000000e+02  -2.4738110e+00  -7.3219753e+00   5.6165979e+00
   2.1053132e+01  -2.0566086e+01   2.5000000e+02  -2.4859057e+00  -7.0953973e+00   6.2375540e+00
   2.0921953e+01  -2.0604193e+01   2.5000000e+02  -2.4843528e+00  -6.8211111e+00   6.8347625e+00
   2.0791883e+01  -2.0645591e+01   2.5000000e+02  -2.4686000e+00  -6.5061691e+00   7.4004192e+00
   2.0663013e+01  -2.0690249e+01   2.5000000e+02  -2.4379817e+00  -6.1589225e+00   7.9285254e+00
   2.0535436e+01  -2.0738137e+01   2.5000000e+02  -2.3916220e+00  -5.7883946e+00   8.4151208e+00
   2.0409243e+01  -2.0789220e+01   2.5000000e+02  -2.3283979e+00  -5.4035740e+00   8.8582803e+00
   2.0284523e+01  -2.0843462e+01   2.5000000e+02  -2.2469591e+00  -5.0127602e+00   9.2578907e+00
   2.0161365e+01  -2.0900825e+01   2.5000000e+02  -2.1458336e+00  -4.6230482e+00   9.6152333e+00
   2.0039859e+01  -2.0961268e+01   2.5000000e+02  -2.0236080e+00  -4.2400103e+00   9.9324753e+00
   1.9920092e+01  -2.1024748e+01   2.5000000e+02  -1.8791447e+00  -3.8675857e+00   1.0212174e+01
   1.9802151e+01  -2.1091220e+01   2.5000000e+02  -1.7118018e+00  -3.5081993e+00   1.0456846e+01
   1.9686120e+01  -2.1160637e+01   2.5000000e+02  -1.5216071e+00  -3.1630146e+00   1.0668688e+01
   1.9572085e+01  -2.1232948e+01   2.5000000e+02  -1.3093598e+00  -2.8322919e+00   1.0849441e+01
   1.9460129e+01  -2.1308104e+01   2.5000000e+02  -1.0766135e+00  -2.5157249e+00   1.1000406e+01
   1.9350335e+01  -2.1386049e+01   2.5000000e+02  -8.2560884e-01  -2.2127575e+00   1.1122526e+01
   1.9242784e+01  -2.1466728e+01   2.5000000e+02  -5.5908969e-01  -1.9228051e+00   1.1216538e+01
   1.9137555e+01  -2.1550084e+01   2.5000000e+02  -2.8011260e-01  -1.6453968e+00   1.1283099e+01
   1.9034727e+01  -2.1636057e+01   2.5000000e+02   8.1505629e-03  -1.3802441e+00   1.1322882e+01
   1.8934378e+01  -2.1724585e+01   2.5000000e+02   3.0259044e-01  -1.1272420e+00   1.1336631e+01
   1.8836583e+01  -2.1815605e+01   2.5000000e+02   6.0029360e-01  -8.8643048e-01   1.1325173e+01
   1.8741417e+01  -2.1909051e+01   2.5000000e+02   8.9861293e-01  -6.5794929e-01   1.1289386e+01
   1.8648953e+01  -2.2004856e+01   2.5000000e+02   1.1952008e+00  -4.4197603e-01   1.1230157e+01
   1.8559262e+01  -2.2102951e+01   2.5000000e+02   1.4879894e+00  -2.3867794e-01   1.1148324e+01
   1.8472415e+01  -2.2203264e+01   2.5000000e+02   1.7751380e+00  -4.8183857e-02   1.1044627e+01
   1.8388478e+01  -2.2305724e+01   2.5000000e+02   2.0549725e+00   1.2943641e-01   1.0919664e+01
   1.8307520e+01  -2.2410257e+01   2.5000000e+02   2.3258913e+00   2.9414038e-01   1.0773886e+01
   1.8229604e+01  -2.2516785e+01   2.5000000e+02   2.5862842e+00   4.4589613e-01   1.0607618e+01
   1.8154795e+01  -2.2625233e+01   2.5000000e+02   2.8344894e+00   5.8461663e-01   1.0421120e+01
   1.8083152e+01  -2.2735520e+01   2.5000000e+02   3.0687431e+00   7.1012909e-01   1.0214698e+01
   1.8014736e+01  -2.2847567e+01   2.5000000e+02   3.2872199e+00   8.2212311e-01   9.9888289e+00
   1.7949604e+01  -2.2961291e+01   2.5000000e+02   3.4880898e+00   9.2015817e-01   9.7442880e+00
   1.7887810e+01  -2.3076610e+01   2.5000000e+02   3.6696486e+00   1.0036876e+00   9.4822472e+00
   1.7829410e+01  -2.3193438e+01   2.5000000e+02   3.8304596e+00   1.0721100e+00   9.2043261e+00
   1.7774454e+01  -2.3311689e+01   2.5000000e+02   3.9695074e+00   1.1248722e+00   8.9125410e+00
   1.7722991e+01  -2.3431277e+01   2.5000000e+02   4.0863123e+00   1.1615530e+00   8.6091874e+00
   1.7675069e+01  -2.3552112e+01   2.5000000e+02   4.1809687e+00   1.1819541e+00   8.2966611e+00
   1.7630732e+01  -2.3674106e+01   2.5000000e+02   4.2541008e+00   1.1861644e+00   7.9772258e+00
   1.7590022e+01  -2.3797168e+01   2.5000000e+02   4.3067095e+00   1.1745842e+00   7.6528267e+00
   1.7552981e+01  -2.3921205e+01   2.5000000e+02   4.3399512e+00   1.1479000e+00   7.3249584e+00
   1.7519646e+01  -2.4046126e+01   2.5000000e+02   4.3548717e+00   1.1070371e+00   6.9946245e+00
   1.7490053e+01  -2.4171837e+01   2.5000000e+02   4.3521587e+00   1.0530714e+00   6.6624462e+00
   1.7464233e+01  -2.4298243e+01   2.5000000e+02   4.3319639e+00   9.8714612e-01   6.3288556e+00
   1.7442219e+01  -2.4425250e+01   2.5000000e+02   4.2938490e+00   9.1036767e-01   5.9943635e+00
   1.7424038e+01  -2.4552761e+01   2.5000000e+02   4.2368550e+00   8.2377360e-01   5.6598421e+00
   1.7409714e+01  -2.4680680e+01   2.5000000e+02   4.1597092e+00   7.2829555e-01   5.3267385e+00
   1.7399272e+01  -2.4808910e+01   2.5000000e+02   4.0611226e+00   6.2476025e-01   4.9971951e+00
   1.7392729e+01  -2.4937353e+01   2.5000000e+02   3.9401080e+00   5.1395279e-01   4.6740213e+00
   1.7390105e+01  -2.5065911e+01   2.5000000e+02   3.7962844e+00   3.9663749e-01   4.3605364e+00
   1.7391413e+01  -2.5194486e+01   2.5000000e+02   3.6300787e+00   2.7363813e-01   4.0603031e+00
   1.7396664e+01  -2.5322979e+01   2.5000000e+02   3.4428291e+00   1.4586040e-01   3.7768161e+00
   1.7405867e+01  -2.5451290e+01   2.5000000e+02   3.2367668e+00   1.4299687e-02   3.5131873e+00
   1.7419027e+01  -2.5579320e+01   2.5000000e+02   3.0148940e+00  -1.1997921e-01   3.2718717e+00
   1.7436148e+01  -2.5706971e+01   2.5000000e+02   2.7808016e+00  -2.5590300e-01   3.0544716e+00
   1.7457228e+01  -2.5834142e+01   2.5000000e+02   2.5384562e+00  -3.9244305e-01   2.8616242e+00
   1.7482265e+01  -2.5960734e+01   2.5000000e+02   2.2919659e+00  -5.2870640e-01   2.6929459e+00
   1.7511251e+01  -2.6086648e+01   2.5000000e+02   2.0453542e+00  -6.6396945e-01   2.5470492e+00
   1.7544176e+01  -2.6211786e+01   2.5000000e+02   1.8023371e+00  -7.9770897e-01   2.4216077e+00
   1.7581028e+01  -2.6336047e+01   2.5000000e+02   1.5661141e+00  -9.2957978e-01   2.3134753e+00
   1.7621791e+01  -2.6459334e+01   2.5000000e+02   1.3391471e+00  -1.0593527e+00   2.2188516e+00
   1.7666444e+01  -2.6581549e+01   2.5000000e+02   1.1229901e+00  -1.1868260e+00   2.1335152e+00
   1.7714966e+01  -2.6702594e+01   2.5000000e+02   9.1815429e-01  -1.3117485e+00   2.0530976e+00
   1.7767330e+01  -2.6822373e+01   2.5000000e+02   7.2404086e-01  -1.4337232e+00   1.9733941e+00
[truncated: 3,642,157 more chars]
