# Supplementary material for: A high-resolution lithospheric magnetic field model over southern Africa based on a joint inversion of CHAMP, Swarm, WDMAM, and ground magnetic field data
Source: Copernicus journal article supplement (doi:10.5194/se-9-897-2018), 2018-07-16
Supplement: Supplementary file 1 [file se-9-897-2018-supplement.zip › SupplementaryMaterial/ModelSA300km.txt]

   2.2500005e+01  -2.4999991e+01   3.0000000e+02   1.8542976e+00  -2.5888556e+00  -6.1888012e+00
   2.2566483e+01  -2.5124977e+01   3.0000000e+02   1.4007957e+00  -2.1890147e+00  -6.4690688e+00
   2.2649272e+01  -2.5030796e+01   3.0000000e+02   1.4819719e+00  -2.2227413e+00  -6.3759184e+00
   2.2619593e+01  -2.4913455e+01   3.0000000e+02   1.8339908e+00  -2.5393132e+00  -6.1355495e+00
   2.2500000e+01  -2.4861269e+01   3.0000000e+02   2.1919825e+00  -2.8801316e+00  -5.8928623e+00
   2.2380407e+01  -2.4913455e+01   3.0000000e+02   2.2936380e+00  -2.9906188e+00  -5.8623023e+00
   2.2350728e+01  -2.5030796e+01   3.0000000e+02   2.0578871e+00  -2.8080735e+00  -6.0873626e+00
   2.2433517e+01  -2.5124977e+01   3.0000000e+02   1.6575633e+00  -2.4576243e+00  -6.3590812e+00
   2.2791110e+01  -2.5050403e+01   3.0000000e+02   1.1425272e+00  -1.8785603e+00  -6.4905519e+00
   2.2783469e+01  -2.4922052e+01   3.0000000e+02   1.4807980e+00  -2.1853659e+00  -6.2870682e+00
   2.2711005e+01  -2.4811602e+01   3.0000000e+02   1.8913426e+00  -2.5805910e+00  -6.0177292e+00
   2.2590406e+01  -2.4744279e+01   3.0000000e+02   2.2819593e+00  -2.9588223e+00  -5.7312406e+00
   2.2449214e+01  -2.4735429e+01   3.0000000e+02   2.5704148e+00  -3.2301405e+00  -5.5156595e+00
   2.2319588e+01  -2.4787069e+01   3.0000000e+02   2.6954543e+00  -3.3453777e+00  -5.4566519e+00
   2.2231095e+01  -2.4887431e+01   3.0000000e+02   2.6242290e+00  -3.2967524e+00  -5.5855769e+00
   2.2204049e+01  -2.5013608e+01   3.0000000e+02   2.3647140e+00  -3.1019096e+00  -5.8586275e+00
   2.2244821e+01  -2.5136726e+01   3.0000000e+02   1.9732126e+00  -2.7931245e+00  -6.1808984e+00
   2.2344231e+01  -2.5228534e+01   3.0000000e+02   1.5435621e+00  -2.4220464e+00  -6.4546233e+00
   2.2479512e+01  -2.5267912e+01   3.0000000e+02   1.1803155e+00  -2.0659174e+00  -6.6200736e+00
   2.2619515e+01  -2.5245788e+01   3.0000000e+02   9.6916656e-01  -1.8153935e+00  -6.6677560e+00
   2.2731985e+01  -2.5167260e+01   3.0000000e+02   9.5669158e-01  -1.7440973e+00  -6.6184510e+00
   2.2627648e+01  -2.4622121e+01   3.0000000e+02   2.4646795e+00  -3.1490745e+00  -5.4767697e+00
   2.2485785e+01  -2.4604968e+01   3.0000000e+02   2.7677363e+00  -3.4317865e+00  -5.2174504e+00
   2.2345448e+01  -2.4630489e+01   3.0000000e+02   2.9733617e+00  -3.6073904e+00  -5.0569588e+00
   2.2221716e+01  -2.4695945e+01   3.0000000e+02   3.0593351e+00  -3.6706820e+00  -5.0343758e+00
   2.2127926e+01  -2.4794296e+01   3.0000000e+02   3.0107179e+00  -3.6284584e+00  -5.1589977e+00
   2.2074261e+01  -2.4914949e+01   3.0000000e+02   2.8253942e+00  -3.4918494e+00  -5.4075653e+00
   2.2066638e+01  -2.5044874e+01   3.0000000e+02   2.5188395e+00  -3.2714501e+00  -5.7321991e+00
   2.2106024e+01  -2.5169999e+01   3.0000000e+02   2.1243871e+00  -2.9782000e+00  -6.0745396e+00
   2.2188274e+01  -2.5276731e+01   3.0000000e+02   1.6886406e+00  -2.6288976e+00  -6.3803777e+00
   2.2304526e+01  -2.5353443e+01   3.0000000e+02   1.2639413e+00  -2.2517923e+00  -6.6112249e+00
   2.2442139e+01  -2.5391760e+01   3.0000000e+02   9.0014052e-01  -1.8874588e+00  -6.7507045e+00
   2.2586081e+01  -2.5387492e+01   3.0000000e+02   6.3771149e-01  -1.5832838e+00  -6.8039897e+00
   2.2720608e+01  -2.5341106e+01   3.0000000e+02   5.0361721e-01  -1.3837952e+00  -6.7901325e+00
   2.2831035e+01  -2.5257672e+01   3.0000000e+02   5.1002256e-01  -1.3209081e+00  -6.7299554e+00
   2.2905370e+01  -2.5146297e+01   3.0000000e+02   6.5449003e-01  -1.4072873e+00  -6.6345722e+00
   2.2935626e+01  -2.5019107e+01   3.0000000e+02   9.2015603e-01  -1.6338255e+00  -6.5004723e+00
   2.2918657e+01  -2.4889911e+01   3.0000000e+02   1.2762909e+00  -1.9707037e+00  -6.3150741e+00
   2.2856438e+01  -2.4772694e+01   3.0000000e+02   1.6816518e+00  -2.3717219e+00  -6.0707735e+00
   2.2755800e+01  -2.4680108e+01   3.0000000e+02   2.0914344e+00  -2.7821168e+00  -5.7792288e+00
   2.2005477e+01  -2.4730152e+01   3.0000000e+02   3.3430210e+00  -3.9077905e+00  -4.7370975e+00
   2.1948449e+01  -2.4845263e+01   3.0000000e+02   3.1851819e+00  -3.7895975e+00  -4.9842173e+00
   2.1923356e+01  -2.4969413e+01   3.0000000e+02   2.9344724e+00  -3.6177666e+00  -5.2979221e+00
   2.1931748e+01  -2.5095402e+01   3.0000000e+02   2.6046973e+00  -3.3946834e+00  -5.6440417e+00
   2.1973238e+01  -2.5215904e+01   3.0000000e+02   2.2167666e+00  -3.1224688e+00  -5.9879953e+00
   2.2045499e+01  -2.5323890e+01   3.0000000e+02   1.7965793e+00  -2.8060857e+00  -6.2990486e+00
   2.2144380e+01  -2.5413044e+01   3.0000000e+02   1.3724461e+00  -2.4561219e+00  -6.5537323e+00
   2.2264136e+01  -2.5478137e+01   3.0000000e+02   9.7242089e-01  -2.0900789e+00  -6.7383091e+00
   2.2397759e+01  -2.5515346e+01   3.0000000e+02   6.2183042e-01  -1.7315530e+00  -6.8498346e+00
   2.2537398e+01  -2.5522483e+01   3.0000000e+02   3.4140056e-01  -1.4075669e+00  -6.8953020e+00
   2.2674836e+01  -2.5499126e+01   3.0000000e+02   1.4623532e-01  -1.1449143e+00  -6.8888420e+00
   2.2801990e+01  -2.5446650e+01   3.0000000e+02   4.5642399e-02  -9.6653138e-01  -6.8474746e+00
   2.2911403e+01  -2.5368141e+01   3.0000000e+02   4.3573506e-02  -8.8871238e-01  -6.7862462e+00
   2.2996693e+01  -2.5268206e+01   3.0000000e+02   1.3914824e-01  -9.1952204e-01  -6.7138234e+00
   2.3052932e+01  -2.5152698e+01   3.0000000e+02   3.2669489e-01  -1.0582840e+00  -6.6298217e+00
   2.3076921e+01  -2.5028363e+01   3.0000000e+02   5.9525259e-01  -1.2957964e+00  -6.5250989e+00
   2.3067361e+01  -2.4902443e+01   3.0000000e+02   9.2813816e-01  -1.6148914e+00  -6.3855168e+00
   2.3024906e+01  -2.4782247e+01   3.0000000e+02   1.3036904e+00  -1.9914696e+00  -6.1982529e+00
   2.2952106e+01  -2.4674736e+01   3.0000000e+02   1.6976157e+00  -2.3963664e+00  -5.9584564e+00
   2.2853234e+01  -2.4586117e+01   3.0000000e+02   2.0863177e+00  -2.7983937e+00  -5.6737125e+00
   2.2734035e+01  -2.4521494e+01   3.0000000e+02   2.4495750e+00  -3.1680729e+00  -5.3648570e+00
   2.2601387e+01  -2.4484584e+01   3.0000000e+02   2.7714191e+00  -3.4812448e+00  -5.0631108e+00
   2.2462919e+01  -2.4477508e+01   3.0000000e+02   3.0390658e+00  -3.7215944e+00  -4.8046056e+00
   2.2326579e+01  -2.4500672e+01   3.0000000e+02   3.2410078e+00  -3.8815814e+00  -4.6236784e+00
   2.2200199e+01  -2.4552745e+01   3.0000000e+02   3.3657703e+00  -3.9615954e+00  -4.5463364e+00
   2.2091059e+01  -2.4630734e+01   3.0000000e+02   3.4024556e+00  -3.9675880e+00  -4.5851875e+00
   2.1844868e+01  -2.5273528e+01   3.0000000e+02   2.2545779e+00  -3.2356881e+00  -5.9202072e+00
   2.1916247e+01  -2.5384116e+01   3.0000000e+02   1.8289188e+00  -2.9320411e+00  -6.2419674e+00
   2.2010268e+01  -2.5479941e+01   3.0000000e+02   1.3968151e+00  -2.5938204e+00  -6.5120574e+00
   2.2123330e+01  -2.5557281e+01   3.0000000e+02   9.7801401e-01  -2.2308415e+00  -6.7192742e+00
   2.2251066e+01  -2.5613127e+01   3.0000000e+02   5.9089479e-01  -1.8577608e+00  -6.8591875e+00
   2.2388512e+01  -2.5645302e+01   3.0000000e+02   2.5140284e-01  -1.4929160e+00  -6.9342760e+00
   2.2530311e+01  -2.5652548e+01   3.0000000e+02  -2.7676604e-02  -1.1564289e+00  -6.9531222e+00
   2.2670926e+01  -2.5634584e+01   3.0000000e+02  -2.3702457e-01  -8.6805607e-01  -6.9287270e+00
   2.2804870e+01  -2.5592111e+01   3.0000000e+02  -3.7066876e-01  -6.4521480e-01  -6.8761879e+00
   2.2926927e+01  -2.5526786e+01   3.0000000e+02  -4.2557099e-01  -5.0148186e-01  -6.8100432e+00
   2.3032366e+01  -2.5441153e+01   3.0000000e+02  -4.0107970e-01  -4.4571665e-01  -6.7415880e+00
   2.3117126e+01  -2.5338544e+01   3.0000000e+02  -2.9853850e-01  -4.8179298e-01  -6.6765546e+00
   2.3177977e+01  -2.5222939e+01   3.0000000e+02  -1.2133445e-01  -6.0875389e-01  -6.6136696e+00
   2.3212635e+01  -2.5098809e+01   3.0000000e+02   1.2452193e-01  -8.2110729e-01  -6.5446667e+00
   2.3219844e+01  -2.4970944e+01   3.0000000e+02   4.2960584e-01  -1.1090169e+00  -6.4561058e+00
   2.3199412e+01  -2.4844261e+01   3.0000000e+02   7.8077553e-01  -1.4584511e+00  -6.3328252e+00
   2.3152206e+01  -2.4723616e+01   3.0000000e+02   1.1618465e+00  -1.8515019e+00  -6.1622098e+00
   2.3080104e+01  -2.4613620e+01   3.0000000e+02   1.5553033e+00  -2.2672422e+00  -5.9380928e+00
   2.2985914e+01  -2.4518468e+01   3.0000000e+02   1.9444770e+00  -2.6832530e+00  -5.6632483e+00
   2.2873265e+01  -2.4441779e+01   3.0000000e+02   2.3153697e+00  -3.0776552e+00  -5.3499562e+00
   2.2746461e+01  -2.4386462e+01   3.0000000e+02   2.6574508e+00  -3.4312154e+00  -5.0187373e+00
   2.2610323e+01  -2.4354616e+01   3.0000000e+02   2.9631710e+00  -3.7290335e+00  -4.6957908e+00
   2.2470010e+01  -2.4347446e+01   3.0000000e+02   3.2265718e+00  -3.9616063e+00  -4.4096472e+00
   2.2330831e+01  -2.4365223e+01   3.0000000e+02   3.4416195e+00  -4.1251073e+00  -4.1875748e+00
   2.2198056e+01  -2.4407274e+01   3.0000000e+02   3.6010645e+00  -4.2209163e+00  -4.0520562e+00
   2.2076722e+01  -2.4472006e+01   3.0000000e+02   3.6963966e+00  -4.2544311e+00  -4.0177071e+00
   2.1971451e+01  -2.4556965e+01   3.0000000e+02   3.7189791e+00  -4.2332508e+00  -4.0892033e+00
   2.1886278e+01  -2.4658924e+01   3.0000000e+02   3.6619726e+00  -4.1650715e+00  -4.2607387e+00
   2.1824496e+01  -2.4774000e+01   3.0000000e+02   3.5223092e+00  -4.0558299e+00  -4.5172358e+00
   2.1788530e+01  -2.4897801e+01   3.0000000e+02   3.3019981e+00  -3.9086311e+00  -4.8369424e+00
   2.1779836e+01  -2.5025590e+01   3.0000000e+02   3.0084535e+00  -3.7237850e+00  -5.1945223e+00
   2.1798831e+01  -2.5152461e+01   3.0000000e+02   2.6539562e+00  -3.4998995e+00  -5.5638504e+00
   2.2206112e+01  -2.5734817e+01   3.0000000e+02   2.9643285e-01  -1.7266724e+00  -6.9154457e+00
   2.2344390e+01  -2.5768576e+01   3.0000000e+02  -4.3033521e-02  -1.3530666e+00  -6.9707542e+00
   2.2486994e+01  -2.5781239e+01   3.0000000e+02  -3.3143877e-01  -9.9960963e-01  -6.9745304e+00
   2.2629959e+01  -2.5772455e+01   3.0000000e+02  -5.6220800e-01  -6.8194398e-01  -6.9378090e+00
   2.2769312e+01  -2.5742469e+01   3.0000000e+02  -7.3097985e-01  -4.1430998e-01  -6.8735861e+00
   2.2901183e+01  -2.5692114e+01   3.0000000e+02  -8.3533249e-01  -2.0856955e-01  -6.7952898e+00
   2.3021922e+01  -2.5622788e+01   3.0000000e+02  -8.7439331e-01  -7.3566443e-02  -6.7151589e+00
   2.3128207e+01  -2.5536414e+01   3.0000000e+02  -8.4838606e-01  -1.4878080e-02  -6.6426353e+00
   2.3217130e+01  -2.5435380e+01   3.0000000e+02  -7.5825695e-01  -3.4934438e-02  -6.5829319e+00
   2.3286284e+01  -2.5322476e+01   3.0000000e+02  -6.0568132e-01  -1.3328071e-01  -6.5359732e+00
   2.3333824e+01  -2.5200810e+01   3.0000000e+02  -3.9346232e-01  -3.0690693e-01  -6.4960464e+00
   2.3358512e+01  -2.5073722e+01   3.0000000e+02  -1.2627284e-01  -5.5041777e-01  -6.4524301e+00
   2.3359744e+01  -2.4944688e+01   3.0000000e+02   1.8864075e-01  -8.5600282e-01  -6.3910986e+00
   2.3337560e+01  -2.4817228e+01   3.0000000e+02   5.4119563e-01  -1.2132710e+00  -6.2972817e+00
   2.3292633e+01  -2.4694808e+01   3.0000000e+02   9.1897351e-01  -1.6092176e+00  -6.1583598e+00
   2.3226246e+01  -2.4580748e+01   3.0000000e+02   1.3084112e+00  -2.0285302e+00  -5.9664491e+00
   2.3140249e+01  -2.4478131e+01   3.0000000e+02   1.6963793e+00  -2.4543920e+00  -5.7201361e+00
   2.3037005e+01  -2.4389725e+01   3.0000000e+02   2.0716260e+00  -2.8696617e+00  -5.4251115e+00
   2.2919326e+01  -2.4317909e+01   3.0000000e+02   2.4256763e+00  -3.2582219e+00  -5.0937311e+00
   2.2790392e+01  -2.4264612e+01   3.0000000e+02   2.7529539e+00  -3.6062261e+00  -4.7437556e+00
   2.2653675e+01  -2.4231265e+01   3.0000000e+02   3.0501019e+00  -3.9030120e+00  -4.3966196e+00
   2.2512842e+01  -2.4218760e+01   3.0000000e+02   3.3148072e+00  -4.1416750e+00  -4.0754392e+00
   2.2371665e+01  -2.4227433e+01   3.0000000e+02   3.5444365e+00  -4.3192315e+00  -3.8029968e+00
   2.2233924e+01  -2.4257052e+01   3.0000000e+02   3.7349657e+00  -4.4364700e+00  -3.5996810e+00
   2.2103315e+01  -2.4306822e+01   3.0000000e+02   3.8805204e+00  -4.4974380e+00  -3.4814961e+00
   2.1983349e+01  -2.4375409e+01   3.0000000e+02   3.9737253e+00  -4.5085438e+00  -3.4583062e+00
   2.1877268e+01  -2.4460971e+01   3.0000000e+02   4.0067656e+00  -4.4772913e+00  -3.5326661e+00
   2.1787954e+01  -2.4561206e+01   3.0000000e+02   3.9728831e+00  -4.4108405e+00  -3.6995752e+00
   2.1717858e+01  -2.4673412e+01   3.0000000e+02   3.8678297e+00  -4.3146948e+00  -3.9473443e+00
   2.1668928e+01  -2.4794557e+01   3.0000000e+02   3.6909031e+00  -4.1918636e+00  -4.2593058e+00
   2.1642551e+01  -2.4921357e+01   3.0000000e+02   3.4453350e+00  -4.0426752e+00  -4.6158989e+00
   2.1639516e+01  -2.5050367e+01   3.0000000e+02   3.1380446e+00  -3.8652203e+00  -4.9966186e+00
   2.1659977e+01  -2.5178069e+01   3.0000000e+02   2.7790350e+00  -3.6563342e+00  -5.3814120e+00
   2.1703447e+01  -2.5300971e+01   3.0000000e+02   2.3806078e+00  -3.4128754e+00  -5.7516343e+00
   2.1768802e+01  -2.5415702e+01   3.0000000e+02   1.9566130e+00  -3.1331358e+00  -6.0907090e+00
   2.1854304e+01  -2.5519106e+01   3.0000000e+02   1.5217401e+00  -2.8181245e+00  -6.3847919e+00
   2.1957642e+01  -2.5608328e+01   3.0000000e+02   1.0908218e+00  -2.4724633e+00  -6.6235353e+00
   2.2075997e+01  -2.5680903e+01   3.0000000e+02   6.7807269e-01  -2.1046456e+00  -6.8008623e+00
   2.2817160e+01  -2.5862456e+01   3.0000000e+02  -1.1565380e+00  -5.9641722e-02  -6.7765721e+00
   2.2950195e+01  -2.5812714e+01   3.0000000e+02  -1.2581009e+00   1.5319373e-01  -6.6789021e+00
   2.3073880e+01  -2.5746332e+01   3.0000000e+02  -1.3048688e+00   3.0418200e-01  -6.5841666e+00
   2.3185665e+01  -2.5664687e+01   3.0000000e+02  -1.2973489e+00   3.8904048e-01  -6.5013874e+00
   2.3283263e+01  -2.5569471e+01   3.0000000e+02  -1.2362915e+00   4.0570932e-01  -6.4366648e+00
   2.3364693e+01  -2.5462651e+01   3.0000000e+02  -1.1224836e+00   3.5403633e-01  -6.3923325e+00
   2.3428322e+01  -2.5346430e+01   3.0000000e+02  -9.5687958e-01   2.3545224e-01  -6.3663692e+00
   2.3472896e+01  -2.5223196e+01   3.0000000e+02  -7.4105793e-01   5.2704718e-02  -6.3522813e+00
   2.3497562e+01  -2.5095476e+01   3.0000000e+02  -4.7792836e-01  -1.9020909e-01  -6.3396201e+00
   2.3501877e+01  -2.4965878e+01   3.0000000e+02  -1.7237871e-01  -4.8792824e-01  -6.3151991e+00
   2.3485818e+01  -2.4837042e+01   3.0000000e+02   1.6835661e-01  -8.3342769e-01  -6.2648652e+00
   2.3449774e+01  -2.4711583e+01   3.0000000e+02   5.3489507e-01  -1.2177786e+00  -6.1755504e+00
   2.3394533e+01  -2.4592042e+01   3.0000000e+02   9.1642898e-01  -1.6300979e+00  -6.0372114e+00
   2.3321262e+01  -2.4480829e+01   3.0000000e+02   1.3018490e+00  -2.0578614e+00  -5.8443057e+00
   2.3231482e+01  -2.4380185e+01   3.0000000e+02   1.6809245e+00  -2.4875233e+00  -5.5966260e+00
   2.3127031e+01  -2.4292130e+01   3.0000000e+02   2.0453329e+00  -2.9054243e+00  -5.2994007e+00
   2.3010031e+01  -2.4218429e+01   3.0000000e+02   2.3892107e+00  -3.2987044e+00  -4.9628129e+00
   2.2882839e+01  -2.4160555e+01   3.0000000e+02   2.7092046e+00  -3.6561497e+00  -4.6010726e+00
   2.2748007e+01  -2.4119665e+01   3.0000000e+02   3.0039646e+00  -3.9687856e+00  -4.2312985e+00
   2.2608231e+01  -2.4096575e+01   3.0000000e+02   3.2732696e+00  -4.2302669e+00  -3.8723056e+00
   2.2466298e+01  -2.4091744e+01   3.0000000e+02   3.5169598e+00  -4.4370555e+00  -3.5434005e+00
   2.2325037e+01  -2.4105269e+01   3.0000000e+02   3.7339074e+00  -4.5884249e+00  -3.2632046e+00
   2.2187263e+01  -2.4136881e+01   3.0000000e+02   3.9212923e+00  -4.6863404e+00  -3.0484012e+00
   2.2055726e+01  -2.4185949e+01   3.0000000e+02   4.0743352e+00  -4.7351439e+00  -2.9124406e+00
   2.1933060e+01  -2.4251493e+01   3.0000000e+02   4.1865837e+00  -4.7409823e+00  -2.8643019e+00
   2.1821731e+01  -2.4332204e+01   3.0000000e+02   4.2507088e+00  -4.7109570e+00  -2.9075305e+00
   2.1723990e+01  -2.4426466e+01   3.0000000e+02   4.2596328e+00  -4.6520814e+00  -3.0398285e+00
   2.1641829e+01  -2.4532388e+01   3.0000000e+02   4.2077176e+00  -4.5702352e+00  -3.2534013e+00
   2.1576941e+01  -2.4647842e+01   3.0000000e+02   4.0917332e+00  -4.4693518e+00  -3.5360153e+00
   2.1530681e+01  -2.4770499e+01   3.0000000e+02   3.9114256e+00  -4.3510191e+00  -3.8724611e+00
   2.1504041e+01  -2.4897882e+01   3.0000000e+02   3.6695782e+00  -4.2145043e+00  -4.2461471e+00
   2.1497622e+01  -2.5027408e+01   3.0000000e+02   3.3717224e+00  -4.0571832e+00  -4.6403416e+00
   2.1511616e+01  -2.5156444e+01   3.0000000e+02   3.0256068e+00  -3.8752283e+00  -5.0390227e+00
   2.1545804e+01  -2.5282358e+01   3.0000000e+02   2.6406229e+00  -3.6644706e+00  -5.4273165e+00
   2.1599547e+01  -2.5402574e+01   3.0000000e+02   2.2273021e+00  -3.4213712e+00  -5.7916931e+00
   2.1671799e+01  -2.5514624e+01   3.0000000e+02   1.7968864e+00  -3.1439880e+00  -6.1201861e+00
   2.1761122e+01  -2.5616202e+01   3.0000000e+02   1.3609314e+00  -2.8328136e+00  -6.4027581e+00
   2.1865716e+01  -2.5705211e+01   3.0000000e+02   9.3089260e-01  -2.4913171e+00  -6.6318316e+00
   2.1983447e+01  -2.5779810e+01   3.0000000e+02   5.1767581e-01  -2.1260845e+00  -6.8028486e+00
   2.2111897e+01  -2.5838451e+01   3.0000000e+02   1.3119138e-01  -1.7465014e+00  -6.9146963e+00
   2.2248414e+01  -2.5879917e+01   3.0000000e+02  -2.2001592e-01  -1.3640750e+00  -6.9698312e+00
   2.2390166e+01  -2.5903346e+01   3.0000000e+02  -5.2896492e-01  -9.9155412e-01  -6.9740514e+00
   2.2534204e+01  -2.5908248e+01   3.0000000e+02  -7.9029720e-01  -6.4196641e-01  -6.9359653e+00
   2.2677529e+01  -2.5894523e+01   3.0000000e+02  -1.0002551e+00  -3.2768107e-01  -6.8662186e+00
   2.3395327e+01  -2.5648315e+01   3.0000000e+02  -1.6449568e+00   8.1218781e-01  -6.1931381e+00
   2.3476438e+01  -2.5543687e+01   3.0000000e+02  -1.5391816e+00   7.6546472e-01  -6.1573419e+00
   2.3542550e+01  -2.5430832e+01   3.0000000e+02  -1.3911669e+00   6.6270197e-01  -6.1447096e+00
   2.3592694e+01  -2.5311479e+01   3.0000000e+02  -1.2012430e+00   5.0579614e-01  -6.1505373e+00
   2.3626151e+01  -2.5187454e+01   3.0000000e+02  -9.7036794e-01   2.9715177e-01  -6.1669126e+00
   2.3642464e+01  -2.5060648e+01   3.0000000e+02  -7.0071583e-01   3.9756840e-02  -6.1832934e+00
   2.3641438e+01  -2.4932989e+01   3.0000000e+02  -3.9614662e-01  -2.6259024e-01  -6.1874987e+00
   2.3623142e+01  -2.4806410e+01   3.0000000e+02  -6.2395543e-02  -6.0496736e-01  -6.1669820e+00
   2.3587905e+01  -2.4682823e+01   3.0000000e+02   2.9309954e-01  -9.8104420e-01  -6.1102100e+00
   2.3536306e+01  -2.4564089e+01   3.0000000e+02   6.6174259e-01  -1.3829763e+00  -6.0079365e+00
   2.3469165e+01  -2.4451993e+01   3.0000000e+02   1.0345519e+00  -1.8015231e+00  -5.8541898e+00
   2.3387527e+01  -2.4348212e+01   3.0000000e+02   1.4030427e+00  -2.2264441e+00  -5.6468554e+00
   2.3292645e+01  -2.4254297e+01   3.0000000e+02   1.7599945e+00  -2.6470447e+00  -5.3878453e+00
   2.3185961e+01  -2.4171648e+01   3.0000000e+02   2.1000122e+00  -3.0528174e+00  -5.0828789e+00
   2.3069082e+01  -2.4101496e+01   3.0000000e+02   2.4197720e+00  -3.4340431e+00  -4.7409837e+00
   2.2943759e+01  -2.4044881e+01   3.0000000e+02   2.7179248e+00  -3.7822824e+00  -4.3738203e+00
   2.2811860e+01  -2.4002644e+01   3.0000000e+02   2.9946839e+00  -4.0907033e+00  -3.9949737e+00
   2.2675344e+01  -2.3975411e+01   3.0000000e+02   3.2511860e+00  -4.3542873e+00  -3.6192379e+00
   2.2536233e+01  -2.3963584e+01   3.0000000e+02   3.4887188e+00  -4.5699229e+00  -3.2619534e+00
   2.2396586e+01  -2.3967339e+01   3.0000000e+02   3.7079398e+00  -4.7364253e+00  -2.9383933e+00
   2.2258470e+01  -2.3986621e+01   3.0000000e+02   3.9082287e+00  -4.8545346e+00  -2.6630947e+00
   2.2123927e+01  -2.4021143e+01   3.0000000e+02   4.0872826e+00  -4.9268578e+00  -2.4490927e+00
   2.1994955e+01  -2.4070395e+01   3.0000000e+02   4.2410087e+00  -4.9576775e+00  -2.3071155e+00
   2.1873472e+01  -2.4133646e+01   3.0000000e+02   4.3638011e+00  -4.9526131e+00  -2.2446701e+00
   2.1761292e+01  -2.4209958e+01   3.0000000e+02   4.4491186e+00  -4.9180482e+00  -2.2653254e+00
   2.1660100e+01  -2.4298196e+01   3.0000000e+02   4.4902945e+00  -4.8604040e+00  -2.3682962e+00
   2.1571427e+01  -2.4397046e+01   3.0000000e+02   4.4814198e+00  -4.7853642e+00  -2.5485268e+00
   2.1496626e+01  -2.4505033e+01   3.0000000e+02   4.4181336e+00  -4.6972149e+00  -2.7972711e+00
   2.1436852e+01  -2.4620542e+01   3.0000000e+02   4.2981734e+00  -4.5984213e+00  -3.1030705e+00
   2.1393044e+01  -2.4741841e+01   3.0000000e+02   4.1216133e+00  -4.4894971e+00  -3.4528994e+00
   2.1365907e+01  -2.4867105e+01   3.0000000e+02   3.8908017e+00  -4.3691470e+00  -3.8332284e+00
   2.1355902e+01  -2.4994445e+01   3.0000000e+02   3.6100618e+00  -4.2345987e+00  -4.2308519e+00
   2.1363232e+01  -2.5121935e+01   3.0000000e+02   3.2852901e+00  -4.0820666e+00  -4.6333515e+00
   2.1387842e+01  -2.5247641e+01   3.0000000e+02   2.9235333e+00  -3.9072796e+00  -5.0292854e+00
   2.1429408e+01  -2.5369649e+01   3.0000000e+02   2.5326458e+00  -3.7060807e+00  -5.4081571e+00
   2.1487346e+01  -2.5486095e+01   3.0000000e+02   2.1210062e+00  -3.4750514e+00  -5.7603882e+00
   2.1560817e+01  -2.5595198e+01   3.0000000e+02   1.6972910e+00  -3.2121375e+00  -6.0773739e+00
   2.1648732e+01  -2.5695281e+01   3.0000000e+02   1.2703001e+00  -2.9172158e+00  -6.3516754e+00
   2.1749773e+01  -2.5784802e+01   3.0000000e+02   8.4870343e-01  -2.5924470e+00  -6.5774094e+00
   2.1862409e+01  -2.5862380e+01   3.0000000e+02   4.4076422e-01  -2.2423840e+00  -6.7506692e+00
   2.1984918e+01  -2.5926814e+01   3.0000000e+02   5.4062780e-02  -1.8738061e+00  -6.8698828e+00
   2.2115417e+01  -2.5977106e+01   3.0000000e+02  -3.0476255e-01  -1.4952958e+00  -6.9360165e+00
   2.2251889e+01  -2.6012474e+01   3.0000000e+02  -6.3015091e-01  -1.1166807e+00  -6.9525549e+00
   2.2392219e+01  -2.6032368e+01   3.0000000e+02  -9.1767971e-01  -7.4837824e-01  -6.9252829e+00
   2.2534225e+01  -2.6036480e+01   3.0000000e+02  -1.1640288e+00  -4.0075683e-01  -6.8618932e+00
   2.2675699e+01  -2.6024745e+01   3.0000000e+02  -1.3669073e+00  -8.3538431e-02  -6.7714762e+00
   2.2814440e+01  -2.5997346e+01   3.0000000e+02  -1.5249770e+00   1.9469375e-01  -6.6639283e+00
   2.2948295e+01  -2.5954709e+01   3.0000000e+02  -1.6377494e+00   4.2685857e-01  -6.5493226e+00
   2.3075191e+01  -2.5897496e+01   3.0000000e+02  -1.7054219e+00   6.0756420e-01  -6.4372812e+00
   2.3193172e+01  -2.5826595e+01   3.0000000e+02  -1.7286521e+00   7.3315070e-01  -6.3363549e+00
   2.3300428e+01  -2.5743104e+01   3.0000000e+02  -1.7082587e+00   8.0157191e-01  -6.2534292e+00
   2.3766996e+01  -2.5206421e+01   3.0000000e+02  -1.2996756e+00   6.2275805e-01  -5.9402100e+00
   2.3783719e+01  -2.5078890e+01   3.0000000e+02  -1.0373347e+00   3.7072914e-01  -5.9878863e+00
   2.3784834e+01  -2.4950467e+01   3.0000000e+02  -7.4256044e-01   7.8144954e-02  -6.0273069e+00
   2.3770378e+01  -2.4822711e+01   3.0000000e+02  -4.1967413e-01  -2.5180256e-01  -6.0466091e+00
   2.3740574e+01  -2.4697168e+01   3.0000000e+02  -7.4595784e-02  -6.1481940e-01  -6.0344953e+00
   2.3695825e+01  -2.4575353e+01   3.0000000e+02   2.8550830e-01  -1.0053001e+00  -5.9812431e+00
   2.3636712e+01  -2.4458730e+01   3.0000000e+02   6.5279012e-01  -1.4162991e+00  -5.8795394e+00
   2.3563983e+01  -2.4348698e+01   3.0000000e+02   1.0194063e+00  -1.8397189e+00  -5.7250675e+00
   2.3478542e+01  -2.4246574e+01   3.0000000e+02   1.3782125e+00  -2.2666875e+00  -5.5167885e+00
   2.3381437e+01  -2.4153577e+01   3.0000000e+02   1.7233530e+00  -2.6880469e+00  -5.2569252e+00
   2.3273847e+01  -2.4070813e+01   3.0000000e+02   2.0506623e+00  -3.0948612e+00  -4.9506969e+00
   2.3157070e+01  -2.3999268e+01   3.0000000e+02   2.3578205e+00  -3.4788533e+00  -4.6059023e+00
   2.3032504e+01  -2.3939789e+01   3.0000000e+02   2.6442902e+00  -3.8327794e+00  -4.2323772e+00
   2.2901635e+01  -2.3893081e+01   3.0000000e+02   2.9109911e+00  -4.1506389e+00  -3.8414850e+00
   2.2766016e+01  -2.3859698e+01   3.0000000e+02   3.1598192e+00  -4.4278122e+00  -3.4456200e+00
   2.2627254e+01  -2.3840034e+01   3.0000000e+02   3.3930303e+00  -4.6611118e+00  -3.0577822e+00
   2.2486990e+01  -2.3834322e+01   3.0000000e+02   3.6125938e+00  -4.8488007e+00  -2.6912123e+00
   2.2346878e+01  -2.3842629e+01   3.0000000e+02   3.8195905e+00  -4.9906187e+00  -2.3590131e+00
   2.2208576e+01  -2.3864856e+01   3.0000000e+02   4.0137156e+00  -5.0877980e+00  -2.0737544e+00
   2.2073717e+01  -2.3900742e+01   3.0000000e+02   4.1930041e+00  -5.1430756e+00  -1.8469191e+00
   2.1943900e+01  -2.3949862e+01   3.0000000e+02   4.3537702e+00  -5.1606125e+00  -1.6882399e+00
   2.1820668e+01  -2.4011634e+01   3.0000000e+02   4.4908296e+00  -5.1457600e+00  -1.6049539e+00
   2.1705490e+01  -2.4085325e+01   3.0000000e+02   4.5979626e+00  -5.1046363e+00  -1.6011146e+00
   2.1599747e+01  -2.4170063e+01   3.0000000e+02   4.6685583e+00  -5.0435321e+00  -1.6771583e+00
   2.1504717e+01  -2.4264838e+01   3.0000000e+02   4.6963561e+00  -4.9682608e+00  -1.8297771e+00
   2.1421556e+01  -2.4368522e+01   3.0000000e+02   4.6761522e+00  -4.8835419e+00  -2.0522757e+00
   2.1351286e+01  -2.4479876e+01   3.0000000e+02   4.6043611e+00  -4.7925661e+00  -2.3352542e+00
   2.1294783e+01  -2.4597569e+01   3.0000000e+02   4.4793423e+00  -4.6967804e+00  -2.6675584e+00
   2.1252763e+01  -2.4720187e+01   3.0000000e+02   4.3014906e+00  -4.5959173e+00  -3.0372153e+00
   2.1225776e+01  -2.4846255e+01   3.0000000e+02   4.0730823e+00  -4.4881892e+00  -3.4322974e+00
   2.1214194e+01  -2.4974252e+01   3.0000000e+02   3.7979890e+00  -4.3705999e+00  -3.8414861e+00
   2.1218203e+01  -2.5102628e+01   3.0000000e+02   3.4813235e+00  -4.2393028e+00  -4.2543644e+00
   2.1237805e+01  -2.5229823e+01   3.0000000e+02   3.1290840e+00  -4.0899699e+00  -4.6614855e+00
   2.1272810e+01  -2.5354289e+01   3.0000000e+02   2.7478580e+00  -3.9181907e+00  -5.0542579e+00
   2.1322835e+01  -2.5474505e+01   3.0000000e+02   2.3446174e+00  -3.7199185e+00  -5.4247698e+00
   2.1387313e+01  -2.5588997e+01   3.0000000e+02   1.9265597e+00  -3.4919402e+00  -5.7656999e+00
   2.1465492e+01  -2.5696358e+01   3.0000000e+02   1.5009955e+00  -3.2323616e+00  -6.0703360e+00
   2.1556443e+01  -2.5795263e+01   3.0000000e+02   1.0752360e+00  -2.9410245e+00  -6.3327641e+00
   2.1659074e+01  -2.5884489e+01   3.0000000e+02   6.5641664e-01  -2.6197595e+00  -6.5482039e+00
   2.1772138e+01  -2.5962932e+01   3.0000000e+02   2.5129173e-01  -2.2724513e+00  -6.7133712e+00
   2.1894251e+01  -2.6029616e+01   3.0000000e+02  -1.3397337e-01  -1.9048898e+00  -6.8268041e+00
   2.2023907e+01  -2.6083711e+01   3.0000000e+02  -4.9400143e-01  -1.5244382e+00  -6.8890644e+00
   2.2159501e+01  -2.6124543e+01   3.0000000e+02  -8.2431240e-01  -1.1395823e+00  -6.9027825e+00
   2.2299346e+01  -2.6151603e+01   3.0000000e+02  -1.1213331e+00  -7.5943691e-01  -6.8725443e+00
   2.2441699e+01  -2.6164552e+01   3.0000000e+02  -1.3823449e+00  -3.9322864e-01  -6.8046548e+00
   2.2584779e+01  -2.6163228e+01   3.0000000e+02  -1.6054038e+00  -4.9816490e-02  -6.7067958e+00
   2.2726800e+01  -2.6147648e+01   3.0000000e+02  -1.7892856e+00   2.6276063e-01  -6.5876021e+00
   2.2865988e+01  -2.6118006e+01   3.0000000e+02  -1.9334197e+00   5.3760345e-01  -6.4561994e+00
   2.3000608e+01  -2.6074673e+01   3.0000000e+02  -2.0378484e+00   7.6918648e-01  -6.3217212e+00
   2.3128985e+01  -2.6018190e+01   3.0000000e+02  -2.1031231e+00   9.5344155e-01  -6.1928549e+00
   2.3249532e+01  -2.5949261e+01   3.0000000e+02  -2.1301483e+00   1.0877407e+00  -6.0774060e+00
   2.3360764e+01  -2.5868743e+01   3.0000000e+02  -2.1199318e+00   1.1707474e+00  -5.9819111e+00
   2.3461321e+01  -2.5777637e+01   3.0000000e+02  -2.0733320e+00   1.2022230e+00  -5.9112395e+00
   2.3549984e+01  -2.5677070e+01   3.0000000e+02  -1.9908299e+00   1.1827607e+00  -5.8682165e+00
   2.3625690e+01  -2.5568286e+01   3.0000000e+02  -1.8724639e+00   1.1135273e+00  -5.8532535e+00
   2.3687542e+01  -2.5452625e+01   3.0000000e+02  -1.7179336e+00   9.9600529e-01  -5.8640828e+00
   2.3734822e+01  -2.5331509e+01   3.0000000e+02  -1.5269429e+00   8.3183507e-01  -5.8956385e+00
   2.3875586e+01  -2.4659982e+01   3.0000000e+02  -2.8797122e-01  -4.2073344e-01  -5.9121469e+00
   2.3830879e+01  -2.4537575e+01   3.0000000e+02   6.6720571e-02  -8.0685365e-01  -5.8875473e+00
   2.3773097e+01  -2.4419804e+01   3.0000000e+02   4.2809365e-01  -1.2134336e+00  -5.8157393e+00
   2.3702841e+01  -2.4307823e+01   3.0000000e+02   7.8906523e-01  -1.6337657e+00  -5.6921393e+00
   2.3620832e+01  -2.4202727e+01   3.0000000e+02   1.1430290e+00  -2.0603267e+00  -5.5148782e+00
   2.3527895e+01  -2.4105543e+01   3.0000000e+02   1.4843827e+00  -2.4851875e+00  -5.2848247e+00
   2.3424960e+01  -2.4017218e+01   3.0000000e+02   1.8089021e+00  -2.9004215e+00  -5.0054117e+00
   2.3313046e+01  -2.3938609e+01   3.0000000e+02   2.1139843e+00  -3.2985101e+00  -4.6823124e+00
   2.3193253e+01  -2.3870480e+01   3.0000000e+02   2.3986813e+00  -3.6726368e+00  -4.3230521e+00
   2.3066752e+01  -2.3813490e+01   3.0000000e+02   2.6635683e+00  -4.0169105e+00  -3.9365778e+00
   2.2934774e+01  -2.3768190e+01   3.0000000e+02   2.9104426e+00  -4.3264789e+00  -3.5328761e+00
   2.2798599e+01  -2.3735020e+01   3.0000000e+02   3.1418987e+00  -4.5975731e+00  -3.1226517e+00
   2.2659544e+01  -2.3714297e+01   3.0000000e+02   3.3608242e+00  -4.8275283e+00  -2.7170448e+00
   2.2518950e+01  -2.3706224e+01   3.0000000e+02   3.5698621e+00  -5.0147637e+00  -2.3274643e+00
   2.2378173e+01  -2.3710877e+01   3.0000000e+02   3.7708962e+00  -5.1588202e+00  -1.9653766e+00
   2.2238571e+01  -2.3728212e+01   3.0000000e+02   3.9646202e+00  -5.2604065e+00  -1.6421050e+00
   2.2101491e+01  -2.3758062e+01   3.0000000e+02   4.1502355e+00  -5.3214795e+00  -1.3684844e+00
   2.1968257e+01  -2.3800137e+01   3.0000000e+02   4.3253137e+00  -5.3452843e+00  -1.1543788e+00
   2.1840160e+01  -2.3854033e+01   3.0000000e+02   4.4858532e+00  -5.3362803e+00  -1.0081009e+00
   2.1718445e+01  -2.3919227e+01   3.0000000e+02   4.6265359e+00  -5.2999283e+00  -9.3570749e-01
   2.1604300e+01  -2.3995088e+01   3.0000000e+02   4.7411658e+00  -5.2422797e+00  -9.4043100e-01
   2.1498847e+01  -2.4080881e+01   3.0000000e+02   4.8232367e+00  -5.1694413e+00  -1.0222981e+00
   2.1403126e+01  -2.4175771e+01   3.0000000e+02   4.8665678e+00  -5.0869947e+00  -1.1780432e+00
   2.1318092e+01  -2.4278837e+01   3.0000000e+02   4.8658917e+00  -4.9994668e+00  -1.4014529e+00
   2.1244599e+01  -2.4389071e+01   3.0000000e+02   4.8173476e+00  -4.9099690e+00  -1.6839112e+00
   2.1183398e+01  -2.4505397e+01   3.0000000e+02   4.7187689e+00  -4.8200172e+00  -2.0152583e+00
   2.1135123e+01  -2.4626673e+01   3.0000000e+02   4.5697926e+00  -4.7295650e+00  -2.3845834e+00
   2.1100284e+01  -2.4751708e+01   3.0000000e+02   4.3717618e+00  -4.6371748e+00  -2.7810002e+00
   2.1079268e+01  -2.4879269e+01   3.0000000e+02   4.1274997e+00  -4.5402783e+00  -3.1942024e+00
   2.1072323e+01  -2.5008094e+01   3.0000000e+02   3.8410204e+00  -4.4354622e+00  -3.6147630e+00
   2.1079564e+01  -2.5136907e+01   3.0000000e+02   3.5172034e+00  -4.3187324e+00  -4.0342649e+00
   2.1100962e+01  -2.5264425e+01   3.0000000e+02   3.1615324e+00  -4.1857813e+00  -4.4451854e+00
   2.1136349e+01  -2.5389375e+01   3.0000000e+02   2.7798563e+00  -4.0322488e+00  -4.8407422e+00
   2.1185413e+01  -2.5510507e+01   3.0000000e+02   2.3782318e+00  -3.8540338e+00  -5.2146680e+00
   2.1247702e+01  -2.5626604e+01   3.0000000e+02   1.9628294e+00  -3.6476551e+00  -5.5610478e+00
   2.1322627e+01  -2.5736496e+01   3.0000000e+02   1.5398659e+00  -3.4106404e+00  -5.8742742e+00
   2.1409465e+01  -2.5839073e+01   3.0000000e+02   1.1155424e+00  -3.1418960e+00  -6.1491438e+00
   2.1507366e+01  -2.5933295e+01   3.0000000e+02   6.9595605e-01  -2.8419872e+00  -6.3810925e+00
   2.1615363e+01  -2.6018206e+01   3.0000000e+02   2.8694642e-01  -2.5132629e+00  -6.5665181e+00
   2.1732377e+01  -2.6092940e+01   3.0000000e+02  -1.0606218e-01  -2.1598317e+00  -6.7030946e+00
   2.1857230e+01  -2.6156734e+01   3.0000000e+02  -4.7824978e-01  -1.7873603e+00  -6.7900369e+00
   2.1988659e+01  -2.6208937e+01   3.0000000e+02  -8.2553200e-01  -1.4027598e+00  -6.8282494e+00
   2.2125326e+01  -2.6249014e+01   3.0000000e+02  -1.1445930e+00  -1.0138211e+00  -6.8203538e+00
   2.2265835e+01  -2.6276554e+01   3.0000000e+02  -1.4328634e+00  -6.2879779e-01  -6.7706118e+00
   2.2408747e+01  -2.6291274e+01   3.0000000e+02  -1.6884330e+00  -2.5599351e-01  -6.6847520e+00
   2.2552596e+01  -2.6293022e+01   3.0000000e+02  -1.9099554e+00   9.6637631e-02  -6.5697143e+00
   2.2695905e+01  -2.6281782e+01   3.0000000e+02  -2.0965864e+00   4.2185714e-01  -6.4333193e+00
   2.2837204e+01  -2.6257668e+01   3.0000000e+02  -2.2479377e+00   7.1342836e-01  -6.2838994e+00
   2.2975043e+01  -2.6220927e+01   3.0000000e+02  -2.3640772e+00   9.6631291e-01  -6.1299018e+00
   2.3108015e+01  -2.6171938e+01   3.0000000e+02  -2.4455247e+00   1.1767764e+00  -5.9794967e+00
   2.3234764e+01  -2.6111201e+01   3.0000000e+02  -2.4931557e+00   1.3423402e+00  -5.8402666e+00
   2.3354006e+01  -2.6039339e+01   3.0000000e+02  -2.5080857e+00   1.4617013e+00  -5.7188984e+00
   2.3464538e+01  -2.5957085e+01   3.0000000e+02  -2.4914369e+00   1.5345448e+00  -5.6209525e+00
   2.3565255e+01  -2.5865276e+01   3.0000000e+02  -2.4441090e+00   1.5613478e+00  -5.5506030e+00
   2.3655157e+01  -2.5764847e+01   3.0000000e+02  -2.3665715e+00   1.5431469e+00  -5.5103830e+00
   2.3733362e+01  -2.5656816e+01   3.0000000e+02  -2.2587531e+00   1.4812983e+00  -5.5009177e+00
   2.3799113e+01  -2.5542275e+01   3.0000000e+02  -2.1200969e+00   1.3772579e+00  -5.5206841e+00
   2.3851784e+01  -2.5422380e+01   3.0000000e+02  -1.9497940e+00   1.2324117e+00  -5.5658591e+00
   2.3890885e+01  -2.5298334e+01   3.0000000e+02  -1.7471554e+00   1.0479829e+00  -5.6303303e+00
   2.3916068e+01  -2.5171383e+01   3.0000000e+02  -1.5121021e+00   8.2509177e-01  -5.7058942e+00
   2.3927125e+01  -2.5042792e+01   3.0000000e+02  -1.2455812e+00   5.6489780e-01  -5.7827186e+00
   2.3923990e+01  -2.4913844e+01   3.0000000e+02  -9.4992591e-01   2.6891008e-01  -5.8499698e+00
   2.3906739e+01  -2.4785818e+01   3.0000000e+02  -6.2897134e-01  -6.0691597e-02  -5.8965958e+00
   2.3728573e+01  -2.4121189e+01   3.0000000e+02   1.0373746e+00  -2.0174700e+00  -5.4268854e+00
   2.3635549e+01  -2.4023575e+01   3.0000000e+02   1.3685248e+00  -2.4407514e+00  -5.2085740e+00
   2.3533333e+01  -2.3934023e+01   3.0000000e+02   1.6825263e+00  -2.8558271e+00  -4.9407705e+00
   2.3422770e+01  -2.3853255e+01   3.0000000e+02   1.9770250e+00  -3.2560296e+00  -4.6282325e+00
   2.3304766e+01  -2.3781924e+01   3.0000000e+02   2.2511614e+00  -3.6352678e+00  -4.2772512e+00
   2.3180283e+01  -2.3720604e+01   3.0000000e+02   2.5054976e+00  -3.9882002e+00  -3.8952983e+00
   2.3050332e+01  -2.3669791e+01   3.0000000e+02   2.7418105e+00  -4.3103108e+00  -3.4907245e+00
   2.2915960e+01  -2.3629891e+01   3.0000000e+02   2.9627938e+00  -4.5979592e+00  -3.0724661e+00
   2.2778251e+01  -2.3601225e+01   3.0000000e+02   3.1716488e+00  -4.8483352e+00  -2.6498950e+00
   2.2638311e+01  -2.3584025e+01   3.0000000e+02   3.3716609e+00  -5.0594515e+00  -2.2326799e+00
   2.2497262e+01  -2.3578427e+01   3.0000000e+02   3.5657486e+00  -5.2301432e+00  -1.8306992e+00
   2.2356235e+01  -2.3584476e+01   3.0000000e+02   3.7560462e+00  -5.3600957e+00  -1.4539965e+00
   2.2216360e+01  -2.3602125e+01   3.0000000e+02   3.9435561e+00  -5.4499358e+00  -1.1126604e+00
   2.2078760e+01  -2.3631230e+01   3.0000000e+02   4.1278906e+00  -5.5013516e+00  -8.1658668e-01
   2.1944540e+01  -2.3671560e+01   3.0000000e+02   4.3071526e+00  -5.5171788e+00  -5.7513029e-01
   2.1814781e+01  -2.3722789e+01   3.0000000e+02   4.4779429e+00  -5.5014203e+00  -3.9655623e-01
   2.1690531e+01  -2.3784506e+01   3.0000000e+02   4.6355372e+00  -5.4591050e+00  -2.8745642e-01
   2.1572798e+01  -2.3856215e+01   3.0000000e+02   4.7742009e+00  -5.3959890e+00  -2.5214598e-01
   2.1462542e+01  -2.3937336e+01   3.0000000e+02   4.8876337e+00  -5.3181129e+00  -2.9219211e-01
   2.1360668e+01  -2.4027215e+01   3.0000000e+02   4.9694922e+00  -5.2312712e+00  -4.0622443e-01
   2.1268016e+01  -2.4125126e+01   3.0000000e+02   5.0139291e+00  -5.1405044e+00  -5.9000024e-01
   2.1185358e+01  -2.4230273e+01   3.0000000e+02   5.0160772e+00  -5.0496923e+00  -8.3677923e-01
   2.1113392e+01  -2.4341804e+01   3.0000000e+02   4.9724154e+00  -4.9612971e+00  -1.1379680e+00
   2.1052731e+01  -2.4458811e+01   3.0000000e+02   4.8809873e+00  -4.8762992e+00  -1.4838064e+00
   2.1003903e+01  -2.4580337e+01   3.0000000e+02   4.7414453e+00  -4.7942869e+00  -1.8641133e+00
   2.0967340e+01  -2.4705388e+01   3.0000000e+02   4.5549474e+00  -4.7136536e+00  -2.2689164e+00
   2.0943381e+01  -2.4832937e+01   3.0000000e+02   4.3239533e+00  -4.6318494e+00  -2.6889104e+00
   2.0932261e+01  -2.4961935e+01   3.0000000e+02   4.0519679e+00  -4.5456265e+00  -3.1157094e+00
   2.0934113e+01  -2.5091316e+01   3.0000000e+02   3.7432789e+00  -4.4512519e+00  -3.5419253e+00
   2.0948962e+01  -2.5220008e+01   3.0000000e+02   3.4027092e+00  -4.3446818e+00  -3.9610994e+00
   2.0976725e+01  -2.5346941e+01   3.0000000e+02   3.0354100e+00  -4.2217231e+00  -4.3675334e+00
   2.1017212e+01  -2.5471057e+01   3.0000000e+02   2.6466973e+00  -4.0782131e+00  -4.7560752e+00
   2.1070124e+01  -2.5591318e+01   3.0000000e+02   2.2419502e+00  -3.9102542e+00  -5.1218896e+00
   2.1135052e+01  -2.5706714e+01   3.0000000e+02   1.8265589e+00  -3.7145087e+00  -5.4602909e+00
   2.1211486e+01  -2.5816275e+01   3.0000000e+02   1.4058820e+00  -3.4885155e+00  -5.7667066e+00
   2.1298812e+01  -2.5919076e+01   3.0000000e+02   9.8523650e-01  -3.2310158e+00  -6.0367322e+00
   2.1396318e+01  -2.6014246e+01   3.0000000e+02   5.6983798e-01  -2.9421973e+00  -6.2663359e+00
   2.1503202e+01  -2.6100978e+01   3.0000000e+02   1.6468514e-01  -2.6238140e+00  -6.4521420e+00
   2.1618575e+01  -2.6178534e+01   3.0000000e+02  -2.2557418e-01  -2.2791848e+00  -6.5917169e+00
   2.1741470e+01  -2.6246251e+01   3.0000000e+02  -5.9679748e-01  -1.9130536e+00  -6.6838255e+00
   2.1870849e+01  -2.6303553e+01   3.0000000e+02  -9.4548621e-01  -1.5313497e+00  -6.7286013e+00
   2.2005615e+01  -2.6349947e+01   3.0000000e+02  -1.2688161e+00  -1.1409021e+00  -6.7276340e+00
   2.2144619e+01  -2.6385037e+01   3.0000000e+02  -1.5646395e+00  -7.4910722e-01  -6.6839619e+00
   2.2286673e+01  -2.6408521e+01   3.0000000e+02  -1.8313836e+00  -3.6359569e-01  -6.6020023e+00
   2.2430558e+01  -2.6420198e+01   3.0000000e+02  -2.0679460e+00   8.1108220e-03  -6.4874049e+00
   2.2575040e+01  -2.6419967e+01   3.0000000e+02  -2.2735925e+00   3.5894042e-01  -6.3468379e+00
   2.2718877e+01  -2.6407830e+01   3.0000000e+02  -2.4478970e+00   6.8256511e-01  -6.1877058e+00
   2.2860835e+01  -2.6383891e+01   3.0000000e+02  -2.5907344e+00   9.7364919e-01  -6.0178126e+00
   2.2999697e+01  -2.6348357e+01   3.0000000e+02  -2.7023051e+00   1.2279960e+00  -5.8450092e+00
   2.3134275e+01  -2.6301531e+01   3.0000000e+02  -2.7831471e+00   1.4425900e+00  -5.6768737e+00
   2.3263423e+01  -2.6243816e+01   3.0000000e+02  -2.8341404e+00   1.6155654e+00  -5.5204182e+00
   2.3386045e+01  -2.6175706e+01   3.0000000e+02  -2.8564097e+00   1.7460750e+00  -5.3818941e+00
   2.3501106e+01  -2.6097781e+01   3.0000000e+02  -2.8511712e+00   1.8341299e+00  -5.2666320e+00
   2.3607643e+01  -2.6010708e+01   3.0000000e+02  -2.8195415e+00   1.8804281e+00  -5.1788862e+00
   2.3704769e+01  -2.5915227e+01   3.0000000e+02  -2.7622960e+00   1.8861402e+00  -5.1217125e+00
   2.3791685e+01  -2.5812147e+01   3.0000000e+02  -2.6797075e+00   1.8527205e+00  -5.0967745e+00
   2.3867684e+01  -2.5702342e+01   3.0000000e+02  -2.5714737e+00   1.7817095e+00  -5.1041459e+00
   2.3932155e+01  -2.5586739e+01   3.0000000e+02  -2.4367669e+00   1.6745412e+00  -5.1421340e+00
   2.3984591e+01  -2.5466309e+01   3.0000000e+02  -2.2744451e+00   1.5324015e+00  -5.2071419e+00
   2.4024590e+01  -2.5342065e+01   3.0000000e+02  -2.0833965e+00   1.3561639e+00  -5.2936453e+00
   2.4051855e+01  -2.5215044e+01   3.0000000e+02  -1.8629209e+00   1.1463965e+00  -5.3943466e+00
   2.4066201e+01  -2.5086305e+01   3.0000000e+02  -1.6131559e+00   9.0352613e-01  -5.5004553e+00
   2.4067549e+01  -2.4956919e+01   3.0000000e+02  -1.3353855e+00   6.2807698e-01  -5.6021664e+00
   2.4055928e+01  -2.4827958e+01   3.0000000e+02  -1.0322187e+00   3.2098762e-01  -5.6892342e+00
   2.4031475e+01  -2.4700486e+01   3.0000000e+02  -7.0759853e-01  -1.6060882e-02  -5.7516026e+00
   2.3994430e+01  -2.4575552e+01   3.0000000e+02  -3.6663449e-01  -3.8038081e-01  -5.7800371e+00
   2.3945134e+01  -2.4454183e+01   3.0000000e+02  -1.5297946e-02  -7.6812730e-01  -5.7666903e+00
   2.3884024e+01  -2.4337372e+01   3.0000000e+02   3.3999989e-01  -1.1743185e+00  -5.7055601e+00
   2.3811632e+01  -2.4226071e+01   3.0000000e+02   6.9286159e-01  -1.5929881e+00  -5.5928012e+00
   2.3375689e+01  -2.3671439e+01   3.0000000e+02   2.1799636e+00  -3.7139482e+00  -4.1166043e+00
   2.3252789e+01  -2.3610399e+01   3.0000000e+02   2.4137984e+00  -4.0595934e+00  -3.7385645e+00
   2.3124911e+01  -2.3558757e+01   3.0000000e+02   2.6304284e+00  -4.3774329e+00  -3.3370083e+00
   2.2992907e+01  -2.3516857e+01   3.0000000e+02   2.8325742e+00  -4.6643430e+00  -2.9193029e+00
   2.2857652e+01  -2.3484975e+01   3.0000000e+02   3.0234908e+00  -4.9178315e+00  -2.4930949e+00
   2.2720038e+01  -2.3463321e+01   3.0000000e+02   3.2066296e+00  -5.1359909e+00  -2.0662539e+00
   2.2580974e+01  -2.3452037e+01   3.0000000e+02   3.3852784e+00  -5.3174699e+00  -1.6468735e+00
   2.2441376e+01  -2.3451200e+01   3.0000000e+02   3.5622276e+00  -5.4614923e+00  -1.2432880e+00
   2.2302165e+01  -2.3460813e+01   3.0000000e+02   3.7394521e+00  -5.5679339e+00  -8.6405868e-01
   2.2164258e+01  -2.3480814e+01   3.0000000e+02   3.9178679e+00  -5.6374316e+00  -5.1793264e-01
   2.2028563e+01  -2.3511070e+01   3.0000000e+02   4.0971477e+00  -5.6715311e+00  -2.1365313e-01
   2.1895979e+01  -2.3551382e+01   3.0000000e+02   4.2756279e+00  -5.6727976e+00   4.0319245e-02
   2.1767383e+01  -2.3601484e+01   3.0000000e+02   4.4503260e+00  -5.6448608e+00   2.3628155e-01
   2.1643629e+01  -2.3661045e+01   3.0000000e+02   4.6170576e+00  -5.5923240e+00   3.6780516e-01
   2.1525543e+01  -2.3729670e+01   3.0000000e+02   4.7706671e+00  -5.5205290e+00   4.3027523e-01
   2.1413916e+01  -2.3806904e+01   3.0000000e+02   4.9053618e+00  -5.4351874e+00   4.2133317e-01
   2.1309500e+01  -2.3892235e+01   3.0000000e+02   5.0151139e+00  -5.3419335e+00   3.4113604e-01
   2.1213003e+01  -2.3985096e+01   3.0000000e+02   5.0940971e+00  -5.2458713e+00   1.9239206e-01
   2.1125086e+01  -2.4084868e+01   3.0000000e+02   5.1371091e+00  -5.1511839e+00  -1.9855222e-02
   2.1046355e+01  -2.4190885e+01   3.0000000e+02   5.1399335e+00  -5.0608615e+00  -2.8864612e-01
   2.0977359e+01  -2.4302438e+01   3.0000000e+02   5.0995928e+00  -4.9765776e+00  -6.0567556e-01
   2.0918587e+01  -2.4418778e+01   3.0000000e+02   5.0144773e+00  -4.8987094e+00  -9.6190808e-01
   2.0870461e+01  -2.4539125e+01   3.0000000e+02   4.8843437e+00  -4.8264706e+00  -1.3481735e+00
   2.0833338e+01  -2.4662665e+01   3.0000000e+02   4.7102179e+00  -4.7581225e+00  -1.7556302e+00
   2.0807500e+01  -2.4788566e+01   3.0000000e+02   4.4942111e+00  -4.6911949e+00  -2.1761345e+00
   2.0793157e+01  -2.4915972e+01   3.0000000e+02   4.2393282e+00  -4.6227008e+00  -2.6024014e+00
   2.0790442e+01  -2.5044017e+01   3.0000000e+02   3.9492461e+00  -4.5492945e+00  -3.0280907e+00
   2.0799410e+01  -2.5171828e+01   3.0000000e+02   3.6281197e+00  -4.4673895e+00  -3.4477487e+00
   2.0820036e+01  -2.5298531e+01   3.0000000e+02   3.2804057e+00  -4.3732429e+00  -3.8566791e+00
   2.0852214e+01  -2.5423255e+01   3.0000000e+02   2.9107200e+00  -4.2630425e+00  -4.2507560e+00
   2.0895760e+01  -2.5545142e+01   3.0000000e+02   2.5237110e+00  -4.1330169e+00  -4.6262353e+00
   2.0950406e+01  -2.5663350e+01   3.0000000e+02   2.1240004e+00  -3.9796126e+00  -4.9795305e+00
   2.1015807e+01  -2.5777060e+01   3.0000000e+02   1.7161448e+00  -3.7997148e+00  -5.3070781e+00
   2.1091539e+01  -2.5885481e+01   3.0000000e+02   1.3046393e+00  -3.5909162e+00  -5.6052610e+00
   2.1177102e+01  -2.5987858e+01   3.0000000e+02   8.9391088e-01  -3.3517771e+00  -5.8704546e+00
   2.1271924e+01  -2.6083476e+01   3.0000000e+02   4.8829910e-01  -3.0820392e+00  -6.0991725e+00
   2.1375364e+01  -2.6171663e+01   3.0000000e+02   9.1998362e-02  -2.7827567e+00  -6.2882862e+00
   2.1486712e+01  -2.6251800e+01   3.0000000e+02  -2.9106219e-01  -2.4563210e+00  -6.4352724e+00
   2.1605202e+01  -2.6323323e+01   3.0000000e+02  -6.5735048e-01  -2.1063694e+00  -6.5384535e+00
   2.1730011e+01  -2.6385727e+01   3.0000000e+02  -1.0038427e+00  -1.7376406e+00  -6.5971683e+00
   2.1860266e+01  -2.6438570e+01   3.0000000e+02  -1.3280989e+00  -1.3557666e+00  -6.6118918e+00
   2.1995052e+01  -2.6481479e+01   3.0000000e+02  -1.6282802e+00  -9.6703057e-01  -6.5842924e+00
   2.2133419e+01  -2.6514149e+01   3.0000000e+02  -1.9030812e+00  -5.7812093e-01  -6.5172403e+00
   2.2274388e+01  -2.6536348e+01   3.0000000e+02  -2.1516323e+00  -1.9586477e-01  -6.4147650e+00
   2.2416960e+01  -2.6547918e+01   3.0000000e+02  -2.3733817e+00   1.7305166e-01  -6.2819602e+00
   2.2560121e+01  -2.6548777e+01   3.0000000e+02  -2.5679938e+00   5.2235619e-01  -6.1248262e+00
   2.2702855e+01  -2.6538919e+01   3.0000000e+02  -2.7352965e+00   8.4646133e-01  -5.9500398e+00
   2.2844148e+01  -2.6518414e+01   3.0000000e+02  -2.8752685e+00   1.1406647e+00  -5.7646756e+00
   2.2982999e+01  -2.6487408e+01   3.0000000e+02  -2.9880793e+00   1.4012911e+00  -5.5758896e+00
   2.3118424e+01  -2.6446121e+01   3.0000000e+02  -3.0741328e+00   1.6257273e+00  -5.3906290e+00
   2.3249467e+01  -2.6394845e+01   3.0000000e+02  -3.1341073e+00   1.8123863e+00  -5.2153778e+00
   2.3375208e+01  -2.6333945e+01   3.0000000e+02  -3.1689523e+00   1.9606053e+00  -5.0559643e+00
   2.3494767e+01  -2.6263850e+01   3.0000000e+02  -3.1798003e+00   2.0704832e+00  -4.9174710e+00
   2.3607312e+01  -2.6185057e+01   3.0000000e+02  -3.1678484e+00   2.1427340e+00  -4.8041466e+00
   2.3712068e+01  -2.6098119e+01   3.0000000e+02  -3.1341680e+00   2.1785189e+00  -4.7193649e+00
   2.3808315e+01  -2.6003648e+01   3.0000000e+02  -3.0795212e+00   2.1792901e+00  -4.6655583e+00
   2.3895402e+01  -2.5902307e+01   3.0000000e+02  -3.0042100e+00   2.1466461e+00  -4.6440998e+00
   2.3972745e+01  -2.5794804e+01   3.0000000e+02  -2.9079799e+00   2.0821680e+00  -4.6551880e+00
   2.4039831e+01  -2.5681889e+01   3.0000000e+02  -2.7900393e+00   1.9872746e+00  -4.6976956e+00
   2.4096225e+01  -2.5564347e+01   3.0000000e+02  -2.6491894e+00   1.8630956e+00  -4.7690372e+00
   2.4141569e+01  -2.5442993e+01   3.0000000e+02  -2.4840541e+00   1.7103797e+00  -4.8651106e+00
   2.4175583e+01  -2.5318666e+01   3.0000000e+02  -2.2933863e+00   1.5294703e+00  -4.9803254e+00
   2.4198068e+01  -2.5192222e+01   3.0000000e+02  -2.0764043e+00   1.3203704e+00  -5.1077404e+00
   2.4208907e+01  -2.5064529e+01   3.0000000e+02  -1.8331049e+00   1.0829018e+00  -5.2393186e+00
   2.4208062e+01  -2.4936463e+01   3.0000000e+02  -1.5644954e+00   8.1694473e-01  -5.3662902e+00
   2.4195575e+01  -2.4808896e+01   3.0000000e+02  -1.2727054e+00   5.2271608e-01  -5.4795839e+00
   2.4171566e+01  -2.4682697e+01   3.0000000e+02  -9.6099737e-01   2.0107280e-01  -5.5702818e+00
   2.4136234e+01  -2.4558721e+01   3.0000000e+02  -6.3363974e-01  -1.4625400e-01  -5.6300787e+00
   2.4089849e+01  -2.4437808e+01   3.0000000e+02  -2.9568359e-01  -5.1651430e-01  -5.6517127e+00
   2.4032755e+01  -2.4320772e+01   3.0000000e+02   4.7333671e-02  -9.0592001e-01  -5.6293195e+00
   2.3965366e+01  -2.4208401e+01   3.0000000e+02   3.8972451e-01  -1.3097375e+00  -5.5587111e+00
   2.3888159e+01  -2.4101448e+01   3.0000000e+02   7.2603067e-01  -1.7225131e+00  -5.4375429e+00
   2.3801674e+01  -2.4000630e+01   3.0000000e+02   1.0513595e+00  -2.1383324e+00  -5.2653590e+00
   2.3706508e+01  -2.3906619e+01   3.0000000e+02   1.3617003e+00  -2.5511335e+00  -5.0435124e+00
   2.3603315e+01  -2.3820042e+01   3.0000000e+02   1.6541401e+00  -2.9549691e+00  -4.7749978e+00
   2.3492793e+01  -2.3741475e+01   3.0000000e+02   1.9270224e+00  -3.3442609e+00  -4.4641961e+00
   2.2885146e+01  -2.3358892e+01   3.0000000e+02   2.9238320e+00  -5.0651990e+00  -2.1937650e+00
   2.2747192e+01  -2.3336925e+01   3.0000000e+02   3.0890527e+00  -5.2784574e+00  -1.7569372e+00
   2.2607843e+01  -2.3324592e+01   3.0000000e+02   3.2515812e+00  -5.4571818e+00  -1.3243375e+00
   2.2467885e+01  -2.3321961e+01   3.0000000e+02   3.4144967e+00  -5.6004608e+00  -9.0315882e-01
   2.2328108e+01  -2.3329048e+01   3.0000000e+02   3.5801900e+00  -5.7078528e+00  -5.0093476e-01
   2.2189302e+01  -2.3345813e+01   3.0000000e+02   3.7501338e+00  -5.7795169e+00  -1.2554285e-01
   2.2052250e+01  -2.3372160e+01   3.0000000e+02   3.9247116e+00  -5.8163771e+00   2.1488486e-01
   2.1917727e+01  -2.3407942e+01   3.0000000e+02   4.1031083e+00  -5.8202758e+00   5.1214558e-01
   2.1786497e+01  -2.3452954e+01   3.0000000e+02   4.2832613e+00  -5.7940912e+00   7.5833763e-01
   2.1659305e+01  -2.3506944e+01   3.0000000e+02   4.4619193e+00  -5.7417342e+00   9.4629982e-01
   2.1536875e+01  -2.3569604e+01   3.0000000e+02   4.6347578e+00  -5.6680270e+00   1.0701620e+00
   2.1419911e+01  -2.3640580e+01   3.0000000e+02   4.7966038e+00  -5.5784277e+00   1.1257914e+00
   2.1309083e+01  -2.3719467e+01   3.0000000e+02   4.9417349e+00  -5.4786556e+00   1.1112357e+00
   2.1205035e+01  -2.3805818e+01   3.0000000e+02   5.0642329e+00  -5.3742570e+00   1.0268676e+00
   2.1108372e+01  -2.3899139e+01   3.0000000e+02   5.1583683e+00  -5.2701890e+00   8.7544200e-01
   2.1019662e+01  -2.3998898e+01   3.0000000e+02   5.2189729e+00  -5.1704700e+00   6.6183801e-01
   2.0939431e+01  -2.4104524e+01   3.0000000e+02   5.2417584e+00  -5.0779516e+00   3.9268912e-01
   2.0868161e+01  -2.4215411e+01   3.0000000e+02   5.2235502e+00  -4.9942219e+00   7.5866089e-02
   2.0806283e+01  -2.4330923e+01   3.0000000e+02   5.1624142e+00  -4.9196360e+00  -2.8007619e-01
   2.0754180e+01  -2.4450392e+01   3.0000000e+02   5.0576748e+00  -4.8534576e+00  -6.6641895e-01
   2.0712181e+01  -2.4573129e+01   3.0000000e+02   4.9098343e+00  -4.7940561e+00  -1.0747479e+00
   2.0680558e+01  -2.4698422e+01   3.0000000e+02   4.7204388e+00  -4.7391334e+00  -1.4972503e+00
   2.0659528e+01  -2.4825544e+01   3.0000000e+02   4.4919001e+00  -4.6859287e+00  -1.9269403e+00
   2.0649244e+01  -2.4953753e+01   3.0000000e+02   4.2273283e+00  -4.6313823e+00  -2.3577069e+00
   2.0649800e+01  -2.5082300e+01   3.0000000e+02   3.9303540e+00  -4.5722418e+00  -2.7843397e+00
   2.0661227e+01  -2.5210431e+01   3.0000000e+02   3.6049755e+00  -4.5051216e+00  -3.2024391e+00
   2.0683492e+01  -2.5337393e+01   3.0000000e+02   3.2554085e+00  -4.4265338e+00  -3.6082960e+00
   2.0716498e+01  -2.5462436e+01   3.0000000e+02   2.8859614e+00  -4.3329235e+00  -3.9987198e+00
   2.0760083e+01  -2.5584819e+01   3.0000000e+02   2.5009256e+00  -4.2207345e+00  -4.3708486e+00
   2.0814019e+01  -2.5703817e+01   3.0000000e+02   2.1044981e+00  -4.0865291e+00  -4.7219521e+00
   2.0878018e+01  -2.5818719e+01   3.0000000e+02   1.7007689e+00  -3.9271679e+00  -5.0492627e+00
   2.0951725e+01  -2.5928839e+01   3.0000000e+02   1.2937152e+00  -3.7400382e+00  -5.3498628e+00
   2.1034725e+01  -2.6033518e+01   3.0000000e+02   8.8722688e-01  -3.5232918e+00  -5.6206811e+00
   2.1126546e+01  -2.6132125e+01   3.0000000e+02   4.8512687e-01  -3.2760608e+00  -5.8585803e+00
   2.1226655e+01  -2.6224067e+01   3.0000000e+02   9.1131688e-02  -2.9986127e+00  -6.0605212e+00
   2.1334468e+01  -2.6308787e+01   3.0000000e+02  -2.9121030e-01  -2.6924111e+00  -6.2237932e+00
   2.1449347e+01  -2.6385773e+01   3.0000000e+02  -6.5864111e-01  -2.3600965e+00  -6.3462283e+00
   2.1570610e+01  -2.6454557e+01   3.0000000e+02  -1.0083096e+00  -2.0053819e+00  -6.4264041e+00
   2.1697530e+01  -2.6514720e+01   3.0000000e+02  -1.3378731e+00  -1.6329135e+00  -6.4637836e+00
   2.1829343e+01  -2.6565895e+01   3.0000000e+02  -1.6455530e+00  -1.2480880e+00  -6.4588183e+00
   2.1965251e+01  -2.6607770e+01   3.0000000e+02  -1.9301205e+00  -8.5686494e-01  -6.4130072e+00
   2.2104427e+01  -2.6640090e+01   3.0000000e+02  -2.1908218e+00  -4.6556145e-01  -6.3289277e+00
   2.2246024e+01  -2.6662655e+01   3.0000000e+02  -2.4272593e+00  -8.0623147e-02  -6.2102366e+00
   2.2389175e+01  -2.6675328e+01   3.0000000e+02  -2.6392750e+00   2.9161832e-01  -6.0616099e+00
   2.2533005e+01  -2.6678032e+01   3.0000000e+02  -2.8268390e+00   6.4521508e-01  -5.8886293e+00
   2.2676632e+01  -2.6670749e+01   3.0000000e+02  -2.9899723e+00   9.7484077e-01  -5.6975998e+00
   2.2819178e+01  -2.6653524e+01   3.0000000e+02  -3.1287454e+00   1.2760214e+00  -5.4952775e+00
   2.2959771e+01  -2.6626464e+01   3.0000000e+02  -3.2433048e+00   1.5452686e+00  -5.2885730e+00
   2.3097552e+01  -2.6589733e+01   3.0000000e+02  -3.3339285e+00   1.7801324e+00  -5.0842566e+00
   2.3231682e+01  -2.6543556e+01   3.0000000e+02  -3.4011054e+00   1.9791758e+00  -4.8886771e+00
   2.3361348e+01  -2.6488215e+01   3.0000000e+02  -3.4455705e+00   2.1418652e+00  -4.7075708e+00
   2.3485766e+01  -2.6424049e+01   3.0000000e+02  -3.4682967e+00   2.2684173e+00  -4.5459496e+00
   2.3604188e+01  -2.6351448e+01   3.0000000e+02  -3.4704203e+00   2.3596341e+00  -4.4080622e+00
   2.3715908e+01  -2.6270853e+01   3.0000000e+02  -3.4531207e+00   2.4167516e+00  -4.2973811e+00
   2.3820262e+01  -2.6182753e+01   3.0000000e+02  -3.4174519e+00   2.4412926e+00  -4.2166193e+00
   2.3916638e+01  -2.6087682e+01   3.0000000e+02  -3.3641780e+00   2.4349495e+00  -4.1676943e+00
   2.4004476e+01  -2.5986214e+01   3.0000000e+02  -3.2936197e+00   2.3994573e+00  -4.1516868e+00
   2.4083268e+01  -2.5878959e+01   3.0000000e+02  -3.2055603e+00   2.3364682e+00  -4.1687561e+00
   2.4152569e+01  -2.5766561e+01   3.0000000e+02  -3.0992499e+00   2.2474405e+00  -4.2179964e+00
   2.4211992e+01  -2.5649693e+01   3.0000000e+02  -2.9734798e+00   2.1335123e+00  -4.2973465e+00
   2.4261212e+01  -2.5529053e+01   3.0000000e+02  -2.8267607e+00   1.9954108e+00  -4.4035035e+00
   2.4299968e+01  -2.5405359e+01   3.0000000e+02  -2.6575684e+00   1.8334036e+00  -4.5319027e+00
   2.4328063e+01  -2.5279343e+01   3.0000000e+02  -2.4646253e+00   1.6473113e+00  -4.6767846e+00
   2.4345364e+01  -2.5151752e+01   3.0000000e+02  -2.2471920e+00   1.4366138e+00  -4.8313367e+00
   2.4351805e+01  -2.5023336e+01   3.0000000e+02  -2.0052976e+00   1.2006187e+00  -4.9879308e+00
   2.4347380e+01  -2.4894850e+01   3.0000000e+02  -1.7399058e+00   9.3870843e-01  -5.1384255e+00
   2.4332151e+01  -2.4767047e+01   3.0000000e+02  -1.4529984e+00   6.5062500e-01  -5.2744889e+00
   2.4306238e+01  -2.4640673e+01   3.0000000e+02  -1.1475380e+00   3.3672715e-01  -5.3879737e+00
   2.4269825e+01  -2.4516463e+01   3.0000000e+02  -8.2737827e-01  -1.7797676e-03  -5.4712560e+00
   2.4223154e+01  -2.4395138e+01   3.0000000e+02  -4.9708325e-01  -3.6271669e-01  -5.5175803e+00
   2.4166523e+01  -2.4277400e+01   3.0000000e+02  -1.6169246e-01  -7.4291223e-01  -5.5213601e+00
   2.4100285e+01  -2.4163929e+01   3.0000000e+02   1.7355138e-01  -1.1382881e+00  -5.4784215e+00
   2.4024848e+01  -2.4055378e+01   3.0000000e+02   5.0350171e-01  -1.5440392e+00  -5.3861679e+00
   2.3940665e+01  -2.3952370e+01   3.0000000e+02   8.2342779e-01  -1.9548918e+00  -5.2436503e+00
   2.3848239e+01  -2.3855496e+01   3.0000000e+02   1.1292772e+00  -2.3653517e+00  -5.0515294e+00
   2.3748115e+01  -2.3765309e+01   3.0000000e+02   1.4179206e+00  -2.7699779e+00  -4.8119413e+00
   2.3640879e+01  -2.3682323e+01   3.0000000e+02   1.6873049e+00  -3.1635898e+00  -4.5282965e+00
   2.3527155e+01  -2.3607013e+01   3.0000000e+02   1.9365322e+00  -3.5414225e+00  -4.2050470e+00
   2.3407598e+01  -2.3539804e+01   3.0000000e+02   2.1658709e+00  -3.8992504e+00  -3.8474144e+00
   2.3282895e+01  -2.3481081e+01   3.0000000e+02   2.3766621e+00  -4.2333959e+00  -3.4611968e+00
   2.3153759e+01  -2.3431174e+01   3.0000000e+02   2.5711794e+00  -4.5407526e+00  -3.0525496e+00
   2.3020924e+01  -2.3390368e+01   3.0000000e+02   2.7524184e+00  -4.8187284e+00  -2.6278805e+00
   2.2313461e+01  -2.3201601e+01   3.0000000e+02   3.4358181e+00  -5.8590804e+00  -5.2353005e-02
   2.2174341e+01  -2.3218180e+01   3.0000000e+02   3.5964079e+00  -5.9227527e+00   3.4031346e-01
   2.2036814e+01  -2.3243714e+01   3.0000000e+02   3.7645955e+00  -5.9525592e+00   7.0224241e-01
   2.1901552e+01  -2.3278077e+01   3.0000000e+02   3.9399596e+00  -5.9499450e+00   1.0256266e+00
   2.1769220e+01  -2.3321100e+01   3.0000000e+02   4.1209426e+00  -5.9173579e+00   1.3026894e+00
   2.1640468e+01  -2.3372575e+01   3.0000000e+02   4.3048707e+00  -5.8582940e+00   1.5261033e+00
   2.1515932e+01  -2.3432246e+01   3.0000000e+02   4.4880122e+00  -5.7772257e+00   1.6894987e+00
   2.1396230e+01  -2.3499823e+01   3.0000000e+02   4.6657476e+00  -5.6793771e+00   1.7879067e+00
   2.1281956e+01  -2.3574971e+01   3.0000000e+02   4.8327745e+00  -5.5704028e+00   1.8182307e+00
   2.1173683e+01  -2.3657321e+01   3.0000000e+02   4.9833980e+00  -5.4559842e+00   1.7794698e+00
   2.1071957e+01  -2.3746467e+01   3.0000000e+02   5.1118507e+00  -5.3414223e+00   1.6728501e+00
   2.0977292e+01  -2.3841967e+01   3.0000000e+02   5.2126326e+00  -5.2312711e+00   1.5017480e+00
   2.0890172e+01  -2.3943350e+01   3.0000000e+02   5.2808311e+00  -5.1290630e+00   1.2713939e+00
   2.0811049e+01  -2.4050112e+01   3.0000000e+02   5.3123875e+00  -5.0371538e+00   9.8850251e-01
   2.0740335e+01  -2.4161722e+01   3.0000000e+02   5.3042918e+00  -4.9566799e+00   6.6079262e-01
   2.0678403e+01  -2.4277624e+01   3.0000000e+02   5.2546761e+00  -4.8876345e+00   2.9648069e-01
   2.0625589e+01  -2.4397238e+01   3.0000000e+02   5.1628171e+00  -4.8290272e+00  -9.6183985e-02
   2.0582181e+01  -2.4519965e+01   3.0000000e+02   5.0290626e+00  -4.7790852e+00  -5.0928385e-01
   2.0548425e+01  -2.4645188e+01   3.0000000e+02   4.8547054e+00  -4.7354773e+00  -9.3551540e-01
   2.0524521e+01  -2.4772277e+01   3.0000000e+02   4.6418349e+00  -4.6955086e+00  -1.3683522e+00
   2.0510619e+01  -2.4900589e+01   3.0000000e+02   4.3931968e+00  -4.6562747e+00  -1.8020942e+00
   2.0506821e+01  -2.5029474e+01   3.0000000e+02   4.1120507e+00  -4.6147579e+00  -2.2318880e+00
   2.0513178e+01  -2.5158276e+01   3.0000000e+02   3.8020466e+00  -4.5678724e+00  -2.6536671e+00
   2.0529689e+01  -2.5286339e+01   3.0000000e+02   3.4670917e+00  -4.5124695e+00  -3.0640782e+00
   2.0556303e+01  -2.5413007e+01   3.0000000e+02   3.1112303e+00  -4.4453300e+00  -3.4603605e+00
   2.0592913e+01  -2.5537629e+01   3.0000000e+02   2.7385231e+00  -4.3631701e+00  -3.8401853e+00
   2.0639364e+01  -2.5659565e+01   3.0000000e+02   2.3529357e+00  -4.2626791e+00  -4.2015005e+00
   2.0695445e+01  -2.5778184e+01   3.0000000e+02   1.9582955e+00  -4.1406244e+00  -4.5423052e+00
   2.0760893e+01  -2.5892871e+01   3.0000000e+02   1.5582619e+00  -3.9940053e+00  -4.8604958e+00
   2.0835398e+01  -2.6003030e+01   3.0000000e+02   1.1563459e+00  -3.8202499e+00  -5.1537587e+00
   2.0918594e+01  -2.6108086e+01   3.0000000e+02   7.5596269e-01  -3.6174447e+00  -5.4195117e+00
   2.1010072e+01  -2.6207491e+01   3.0000000e+02   3.6044750e-01  -3.3845187e+00  -5.6549972e+00
   2.1109371e+01  -2.6300723e+01   3.0000000e+02  -2.6924405e-02  -3.1214072e+00  -5.8573982e+00
   2.1215991e+01  -2.6387291e+01   3.0000000e+02  -4.0300517e-01  -2.8291058e+00  -6.0240582e+00
   2.1329383e+01  -2.6466740e+01   3.0000000e+02  -7.6486453e-01  -2.5096848e+00  -6.1526621e+00
   2.1448965e+01  -2.6538649e+01   3.0000000e+02  -1.1099082e+00  -2.1662021e+00  -6.2414444e+00
   2.1574114e+01  -2.6602638e+01   3.0000000e+02  -1.4359907e+00  -1.8026095e+00  -6.2893187e+00
   2.1704176e+01  -2.6658366e+01   3.0000000e+02  -1.7414837e+00  -1.4236128e+00  -6.2960014e+00
   2.1838468e+01  -2.6705539e+01   3.0000000e+02  -2.0253068e+00  -1.0345246e+00  -6.2620859e+00
   2.1976280e+01  -2.6743904e+01   3.0000000e+02  -2.2868594e+00  -6.4112507e-01  -6.1891193e+00
   2.2116882e+01  -2.6773258e+01   3.0000000e+02  -2.5259474e+00  -2.4947123e-01  -6.0796422e+00
   2.2259526e+01  -2.6793443e+01   3.0000000e+02  -2.7426394e+00   1.3429164e-01  -5.9372194e+00
   2.2403453e+01  -2.6804352e+01   3.0000000e+02  -2.9371518e+00   5.0417612e-01  -5.7664010e+00
   2.2547895e+01  -2.6805927e+01   3.0000000e+02  -3.1097317e+00   8.5459462e-01  -5.5726302e+00
   2.2692082e+01  -2.6798159e+01   3.0000000e+02  -3.2605934e+00   1.1806113e+00  -5.3620617e+00
   2.2835244e+01  -2.6781090e+01   3.0000000e+02  -3.3899057e+00   1.4781458e+00  -5.1413056e+00
   2.2976618e+01  -2.6754810e+01   3.0000000e+02  -3.4978252e+00   1.7441125e+00  -4.9171262e+00
   2.3115452e+01  -2.6719461e+01   3.0000000e+02  -3.5845745e+00   1.9764702e+00  -4.6961177e+00
   2.3251011e+01  -2.6675231e+01   3.0000000e+02  -3.6505158e+00   2.1741705e+00  -4.4844398e+00
   2.3382576e+01  -2.6622354e+01   3.0000000e+02  -3.6962137e+00   2.3370293e+00  -4.2876281e+00
   2.3509455e+01  -2.6561113e+01   3.0000000e+02  -3.7224738e+00   2.4655788e+00  -4.1104545e+00
   2.3630984e+01  -2.6491832e+01   3.0000000e+02  -3.7303008e+00   2.5608799e+00  -3.9569225e+00
   2.3746529e+01  -2.6414879e+01   3.0000000e+02  -3.7208206e+00   2.6243643e+00  -3.8302878e+00
   2.3855494e+01  -2.6330661e+01   3.0000000e+02  -3.6951507e+00   2.6577037e+00  -3.7331028e+00
   2.3957318e+01  -2.6239621e+01   3.0000000e+02  -3.6542391e+00   2.6626931e+00  -3.6672768e+00
   2.4051485e+01  -2.6142240e+01   3.0000000e+02  -3.5987264e+00   2.6411707e+00  -3.6340490e+00
   2.4137520e+01  -2.6039027e+01   3.0000000e+02  -3.5288037e+00   2.5949147e+00  -3.6339930e+00
   2.4214996e+01  -2.5930524e+01   3.0000000e+02  -3.4441587e+00   2.5255637e+00  -3.6669103e+00
   2.4283534e+01  -2.5817298e+01   3.0000000e+02  -3.3439650e+00   2.4345097e+00  -3.7317550e+00
   2.4342803e+01  -2.5699936e+01   3.0000000e+02  -3.2269533e+00   2.3227952e+00  -3.8265488e+00
   2.4392524e+01  -2.5579048e+01   3.0000000e+02  -3.0915745e+00   2.1910383e+00  -3.9482887e+00
   2.4432471e+01  -2.5455260e+01   3.0000000e+02  -2.9362024e+00   2.0393762e+00  -4.0929311e+00
   2.4462467e+01  -2.5329209e+01   3.0000000e+02  -2.7593653e+00   1.8674589e+00  -4.2554416e+00
   2.4482391e+01  -2.5201543e+01   3.0000000e+02  -2.5600026e+00   1.6745262e+00  -4.4298701e+00
   2.4492172e+01  -2.5072917e+01   3.0000000e+02  -2.3376668e+00   1.4595423e+00  -4.6095285e+00
   2.4491793e+01  -2.4943986e+01   3.0000000e+02  -2.0926801e+00   1.2213973e+00  -4.7871937e+00
   2.4481286e+01  -2.4815408e+01   3.0000000e+02  -1.8262282e+00   9.5916370e-01  -4.9553488e+00
   2.4460738e+01  -2.4687835e+01   3.0000000e+02  -1.5403829e+00   6.7235641e-01  -5.1064374e+00
   2.4430282e+01  -2.4561912e+01   3.0000000e+02  -1.2380505e+00   3.6116440e-01  -5.2331448e+00
   2.4390102e+01  -2.4438274e+01   3.0000000e+02  -9.2288872e-01   2.6636411e-02  -5.3286595e+00
   2.4340427e+01  -2.4317543e+01   3.0000000e+02  -5.9915516e-01  -3.2923510e-01  -5.3869506e+00
   2.4281532e+01  -2.4200325e+01   3.0000000e+02  -2.7152352e-01  -7.0351921e-01  -5.4030164e+00
   2.4213738e+01  -2.4087206e+01   3.0000000e+02   5.5142865e-02  -1.0924495e+00  -5.3730976e+00
   2.4137403e+01  -2.3978750e+01   3.0000000e+02   3.7606162e-01  -1.4916162e+00  -5.2948294e+00
   2.4052930e+01  -2.3875497e+01   3.0000000e+02   6.8677593e-01  -1.8961739e+00  -5.1673015e+00
   2.3960755e+01  -2.3777959e+01   3.0000000e+02   9.8342817e-01  -2.3011073e+00  -4.9910282e+00
   2.3861352e+01  -2.3686621e+01   3.0000000e+02   1.2629528e+00  -2.7014398e+00  -4.7678367e+00
   2.3755225e+01  -2.3601934e+01   3.0000000e+02   1.5232478e+00  -3.0924473e+00  -4.5006745e+00
   2.3642911e+01  -2.3524316e+01   3.0000000e+02   1.7632500e+00  -3.4697824e+00  -4.1933991e+00
   2.3524973e+01  -2.3454149e+01   3.0000000e+02   1.9829666e+00  -3.8295717e+00  -3.8505438e+00
   2.3401998e+01  -2.3391780e+01   3.0000000e+02   2.1834329e+00  -4.1684418e+00  -3.4771131e+00
   2.3274596e+01  -2.3337513e+01   3.0000000e+02   2.3666090e+00  -4.4835145e+00  -3.0783951e+00
   2.3143399e+01  -2.3291616e+01   3.0000000e+02   2.5352247e+00  -4.7723437e+00  -2.6598594e+00
   2.3009050e+01  -2.3254314e+01   3.0000000e+02   2.6925913e+00  -5.0328756e+00  -2.2270532e+00
   2.2872211e+01  -2.3225789e+01   3.0000000e+02   2.8423511e+00  -5.2633619e+00  -1.7856149e+00
   2.2733552e+01  -2.3206182e+01   3.0000000e+02   2.9882355e+00  -5.4623184e+00  -1.3413022e+00
   2.2593752e+01  -2.3195587e+01   3.0000000e+02   3.1337951e+00  -5.6285081e+00  -9.0007154e-01
   2.2453493e+01  -2.3194058e+01   3.0000000e+02   3.2821628e+00  -5.7609637e+00  -4.6819596e-01
   2.1717233e+01  -2.3201844e+01   3.0000000e+02   3.9652016e+00  -6.0111151e+00   1.8902243e+00
   2.1589456e+01  -2.3252610e+01   3.0000000e+02   4.1502543e+00  -5.9395963e+00   2.1309189e+00
   2.1465502e+01  -2.3310923e+01   3.0000000e+02   4.3379044e+00  -5.8469339e+00   2.3154678e+00
   2.1345895e+01  -2.3376537e+01   3.0000000e+02   4.5240405e+00  -5.7381090e+00   2.4388009e+00
   2.1231146e+01  -2.3449175e+01   3.0000000e+02   4.7038774e+00  -5.6185652e+00   2.4974151e+00
   2.1121746e+01  -2.3528533e+01   3.0000000e+02   4.8721774e+00  -5.4938474e+00   2.4896518e+00
   2.1018166e+01  -2.3614274e+01   3.0000000e+02   5.0234947e+00  -5.3692347e+00   2.4158502e+00
   2.0920855e+01  -2.3706036e+01   3.0000000e+02   5.1524653e+00  -5.2493962e+00   2.2782966e+00
   2.0830238e+01  -2.3803431e+01   3.0000000e+02   5.2540846e+00  -5.1381228e+00   2.0810626e+00
   2.0746715e+01  -2.3906044e+01   3.0000000e+02   5.3239614e+00  -5.0381535e+00   1.8297196e+00
   2.0670657e+01  -2.4013440e+01   3.0000000e+02   5.3585276e+00  -4.9510999e+00   1.5309390e+00
   2.0602407e+01  -2.4125160e+01   3.0000000e+02   5.3551696e+00  -4.8774768e+00   1.1920870e+00
   2.0542276e+01  -2.4240728e+01   3.0000000e+02   5.3122863e+00  -4.8168086e+00   8.2078963e-01
   2.0490546e+01  -2.4359647e+01   3.0000000e+02   5.2292706e+00  -4.7678018e+00   4.2457772e-01
   2.0447460e+01  -2.4481407e+01   3.0000000e+02   5.1064324e+00  -4.7285359e+00   1.0591886e-02
   2.0413229e+01  -2.4605485e+01   3.0000000e+02   4.9448863e+00  -4.6966680e+00  -4.1462663e-01
   2.0388028e+01  -2.4731343e+01   3.0000000e+02   4.7464388e+00  -4.6696061e+00  -8.4522177e-01
   2.0371993e+01  -2.4858436e+01   3.0000000e+02   4.5134694e+00  -4.6446398e+00  -1.2760835e+00
   2.0365222e+01  -2.4986213e+01   3.0000000e+02   4.2488305e+00  -4.6190241e+00  -1.7028426e+00
   2.0367773e+01  -2.5114117e+01   3.0000000e+02   3.9557586e+00  -4.5900138e+00  -2.1218304e+00
   2.0379663e+01  -2.5241588e+01   3.0000000e+02   3.6377779e+00  -4.5548576e+00  -2.5300346e+00
   2.0400871e+01  -2.5368068e+01   3.0000000e+02   3.2985855e+00  -4.5107699e+00  -2.9250507e+00
   2.0431332e+01  -2.5492999e+01   3.0000000e+02   2.9419485e+00  -4.4549017e+00  -3.3049580e+00
   2.0470940e+01  -2.5615832e+01   3.0000000e+02   2.5715735e+00  -4.3843279e+00  -3.6682128e+00
   2.0519549e+01  -2.5736021e+01   3.0000000e+02   2.1910371e+00  -4.2960783e+00  -4.0134671e+00
   2.0576970e+01  -2.5853033e+01   3.0000000e+02   1.8037124e+00  -4.1872149e+00  -4.3393958e+00
   2.0642973e+01  -2.5966347e+01   3.0000000e+02   1.4127708e+00  -4.0549656e+00  -4.6445260e+00
   2.0717289e+01  -2.6075456e+01   3.0000000e+02   1.0212156e+00  -3.8968946e+00  -4.9271205e+00
   2.0799606e+01  -2.6179872e+01   3.0000000e+02   6.3193485e-01  -3.7110949e+00  -5.1851201e+00
   2.0889578e+01  -2.6279124e+01   3.0000000e+02   2.4776025e-01  -3.4963580e+00  -5.4161980e+00
   2.0986819e+01  -2.6372765e+01   3.0000000e+02  -1.2852018e-01  -3.2523120e+00  -5.6178564e+00
   2.1090905e+01  -2.6460372e+01   3.0000000e+02  -4.9418083e-01  -2.9794987e+00  -5.7875899e+00
   2.1201383e+01  -2.6541549e+01   3.0000000e+02  -8.4664167e-01  -2.6793710e+00  -5.9230764e+00
   2.1317763e+01  -2.6615925e+01   3.0000000e+02  -1.1835528e+00  -2.3542727e+00  -6.0223277e+00
   2.1439528e+01  -2.6683162e+01   3.0000000e+02  -1.5029330e+00  -2.0073422e+00  -6.0838373e+00
   2.1566131e+01  -2.6742955e+01   3.0000000e+02  -1.8032487e+00  -1.6424333e+00  -6.1066795e+00
   2.1697003e+01  -2.6795028e+01   3.0000000e+02  -2.0834539e+00  -1.2640133e+00  -6.0906119e+00
   2.1831550e+01  -2.6839145e+01   3.0000000e+02  -2.3430019e+00  -8.7706420e-01  -6.0361388e+00
   2.1969161e+01  -2.6875102e+01   3.0000000e+02  -2.5817692e+00  -4.8696741e-01  -5.9446064e+00
   2.2109206e+01  -2.6902734e+01   3.0000000e+02  -2.7999637e+00  -9.9369364e-02  -5.8182647e+00
   2.2251046e+01  -2.6921915e+01   3.0000000e+02  -2.9980069e+00   2.8001013e-01  -5.6603141e+00
   2.2394029e+01  -2.6932557e+01   3.0000000e+02  -3.1763964e+00   6.4556962e-01  -5.4749114e+00
   2.2537499e+01  -2.6934610e+01   3.0000000e+02  -3.3356061e+00   9.9207696e-01  -5.2670997e+00
   2.2680797e+01  -2.6928065e+01   3.0000000e+02  -3.4760196e+00   1.3149049e+00  -5.0426506e+00
   2.2823264e+01  -2.6912952e+01   3.0000000e+02  -3.5979027e+00   1.6102343e+00  -4.8078389e+00
   2.2964246e+01  -2.6889341e+01   3.0000000e+02  -3.7014328e+00   1.8752019e+00  -4.5691469e+00
   2.3103099e+01  -2.6857339e+01   3.0000000e+02  -3.7867597e+00   2.1079556e+00  -4.3329583e+00
   2.3239186e+01  -2.6817095e+01   3.0000000e+02  -3.8540911e+00   2.3076122e+00  -4.1052728e+00
   2.3371887e+01  -2.6768793e+01   3.0000000e+02  -3.9037716e+00   2.4741494e+00  -3.8914885e+00
   2.3500601e+01  -2.6712653e+01   3.0000000e+02  -3.9363414e+00   2.6082408e+00  -3.6962661e+00
   2.3624745e+01  -2.6648934e+01   3.0000000e+02  -3.9525538e+00   2.7110727e+00  -3.5234834e+00
   2.3743763e+01  -2.6577925e+01   3.0000000e+02  -3.9533381e+00   2.7841762e+00  -3.3762702e+00
   2.3857121e+01  -2.6499951e+01   3.0000000e+02  -3.9397241e+00   2.8292863e+00  -3.2570793e+00
   2.3964317e+01  -2.6415367e+01   3.0000000e+02  -3.9127287e+00   2.8482419e+00  -3.1677577e+00
   2.4064881e+01  -2.6324555e+01   3.0000000e+02  -3.8732197e+00   2.8429049e+00  -3.1096202e+00
   2.4158373e+01  -2.6227927e+01   3.0000000e+02  -3.8217896e+00   2.8151014e+00  -3.0834766e+00
   2.4244391e+01  -2.6125919e+01   3.0000000e+02  -3.7586482e+00   2.7665664e+00  -3.0896137e+00
   2.4322568e+01  -2.6018991e+01   3.0000000e+02  -3.6835543e+00   2.6988793e+00  -3.1277567e+00
   2.4392575e+01  -2.5907622e+01   3.0000000e+02  -3.5958006e+00   2.6133896e+00  -3.1970036e+00
   2.4454124e+01  -2.5792311e+01   3.0000000e+02  -3.4942657e+00   2.5111422e+00  -3.2957365e+00
   2.4506966e+01  -2.5673573e+01   3.0000000e+02  -3.3775146e+00   2.3927976e+00  -3.4215718e+00
   2.4550892e+01  -2.5551935e+01   3.0000000e+02  -3.2439496e+00   2.2585697e+00  -3.5713276e+00
   2.4585736e+01  -2.5427937e+01   3.0000000e+02  -3.0920031e+00   2.1082029e+00  -3.7410120e+00
   2.4611372e+01  -2.5302127e+01   3.0000000e+02  -2.9203249e+00   1.9409850e+00  -3.9258856e+00
   2.4627716e+01  -2.5175060e+01   3.0000000e+02  -2.7279683e+00   1.7558260e+00  -4.1205430e+00
   2.4634725e+01  -2.5047293e+01   3.0000000e+02  -2.5145327e+00   1.5513882e+00  -4.3190437e+00
   2.4632399e+01  -2.4919386e+01   3.0000000e+02  -2.2802773e+00   1.3262806e+00  -4.5150492e+00
   2.4620777e+01  -2.4791896e+01   3.0000000e+02  -2.0261663e+00   1.0792719e+00  -4.7019997e+00
   2.4599937e+01  -2.4665380e+01   3.0000000e+02  -1.7538930e+00   8.0953175e-01  -4.8732796e+00
   2.4569998e+01  -2.4540385e+01   3.0000000e+02  -1.4658490e+00   5.1682898e-01  -5.0224054e+00
   2.4531116e+01  -2.4417453e+01   3.0000000e+02  -1.1650792e+00   2.0170439e-01  -5.1432245e+00
   2.4483484e+01  -2.4297112e+01   3.0000000e+02  -8.5518553e-01  -1.3445152e-01  -5.2301320e+00
   2.4427330e+01  -2.4179882e+01   3.0000000e+02  -5.4021718e-01  -4.8937356e-01  -5.2782874e+00
   2.4362920e+01  -2.4066264e+01   3.0000000e+02  -2.2450024e-01  -8.6000580e-01  -5.2838180e+00
   2.4290548e+01  -2.3956746e+01   3.0000000e+02   8.7566274e-02  -1.2426391e+00  -5.2439914e+00
   2.4210544e+01  -2.3851793e+01   3.0000000e+02   3.9172640e-01  -1.6331001e+00  -5.1573039e+00
   2.4123266e+01  -2.3751854e+01   3.0000000e+02   6.8409285e-01  -2.0269531e+00  -5.0235103e+00
   2.4029099e+01  -2.3657353e+01   3.0000000e+02   9.6136070e-01  -2.4197226e+00  -4.8435538e+00
   2.3928457e+01  -2.3568691e+01   3.0000000e+02   1.2209612e+00  -2.8070618e+00  -4.6194401e+00
   2.3821778e+01  -2.3486242e+01   3.0000000e+02   1.4611876e+00  -3.1849104e+00  -4.3540558e+00
   2.3709522e+01  -2.3410356e+01   3.0000000e+02   1.6812575e+00  -3.5495866e+00  -4.0509756e+00
   2.3592172e+01  -2.3341352e+01   3.0000000e+02   1.8813250e+00  -3.8978446e+00  -3.7142563e+00
   2.3470229e+01  -2.3279522e+01   3.0000000e+02   2.0624516e+00  -4.2268780e+00  -3.3482643e+00
   2.3344211e+01  -2.3225124e+01   3.0000000e+02   2.2265264e+00  -4.5342978e+00  -2.9575170e+00
   2.3214650e+01  -2.3178389e+01   3.0000000e+02   2.3761487e+00  -4.8180623e+00  -2.5465963e+00
   2.3082095e+01  -2.3139511e+01   3.0000000e+02   2.5144609e+00  -5.0764109e+00  -2.1200859e+00
   2.2947102e+01  -2.3108655e+01   3.0000000e+02   2.6449742e+00  -5.3077914e+00  -1.6825731e+00
   2.2810237e+01  -2.3085949e+01   3.0000000e+02   2.7713487e+00  -5.5108020e+00  -1.2386898e+00
   2.2672075e+01  -2.3071488e+01   3.0000000e+02   2.8971793e+00  -5.6841540e+00  -7.9321857e-01
   2.2533193e+01  -2.3065334e+01   3.0000000e+02   3.0257942e+00  -5.8266875e+00  -3.5119964e-01
   2.2394173e+01  -2.3067512e+01   3.0000000e+02   3.1600528e+00  -5.9374306e+00   8.1938408e-02
   2.2255595e+01  -2.3078012e+01   3.0000000e+02   3.3021860e+00  -6.0157168e+00   5.0028416e-01
   2.2118039e+01  -2.3096791e+01   3.0000000e+02   3.4536582e+00  -6.0613424e+00   8.9737791e-01
   2.1982081e+01  -2.3123771e+01   3.0000000e+02   3.6150589e+00  -6.0747602e+00   1.2662666e+00
   2.1848292e+01  -2.3158837e+01   3.0000000e+02   3.7860224e+00  -6.0572636e+00   1.5996655e+00
   2.1145197e+01  -2.3348129e+01   3.0000000e+02   4.5872059e+00  -5.6032477e+00   3.1624114e+00
   2.1034417e+01  -2.3428449e+01   3.0000000e+02   4.7697900e+00  -5.4643741e+00   3.1638717e+00
   2.0929208e+01  -2.3514920e+01   3.0000000e+02   4.9378002e+00  -5.3273924e+00   3.0990225e+00
   2.0829984e+01  -2.3607211e+01   3.0000000e+02   5.0858270e+00  -5.1970828e+00   2.9699722e+00
   2.0737135e+01  -2.3704970e+01   3.0000000e+02   5.2087478e+00  -5.0773227e+00   2.7805734e+00
   2.0651028e+01  -2.3807824e+01   3.0000000e+02   5.3019712e+00  -4.9709240e+00   2.5361448e+00
   2.0572011e+01  -2.3915378e+01   3.0000000e+02   5.3616427e+00  -4.8795722e+00   2.2431136e+00
   2.0500403e+01  -2.4027220e+01   3.0000000e+02   5.3847955e+00  -4.8038432e+00   1.9086229e+00
   2.0436500e+01  -2.4142920e+01   3.0000000e+02   5.3694216e+00  -4.7433165e+00   1.5401258e+00
   2.0380567e+01  -2.4262030e+01   3.0000000e+02   5.3144739e+00  -4.6967324e+00   1.1450497e+00
   2.0332845e+01  -2.4384091e+01   3.0000000e+02   5.2198043e+00  -4.6621952e+00   7.3046285e-01
   2.0293540e+01  -2.4508629e+01   3.0000000e+02   5.0860683e+00  -4.6373669e+00   3.0292436e-01
   2.0262832e+01  -2.4635160e+01   3.0000000e+02   4.9146129e+00  -4.6196591e+00  -1.3166997e-01
   2.0240865e+01  -2.4763189e+01   3.0000000e+02   4.7073786e+00  -4.6063754e+00  -5.6809731e-01
   2.0227752e+01  -2.4892218e+01   3.0000000e+02   4.4668047e+00  -4.5948166e+00  -1.0018477e+00
   2.0223573e+01  -2.5021738e+01   3.0000000e+02   4.1957739e+00  -4.5823334e+00  -1.4290651e+00
   2.0228372e+01  -2.5151242e+01   3.0000000e+02   3.8975216e+00  -4.5663321e+00  -1.8465583e+00
   2.0242159e+01  -2.5280216e+01   3.0000000e+02   3.5755742e+00  -4.5442509e+00  -2.2517452e+00
   2.0264908e+01  -2.5408150e+01   3.0000000e+02   3.2336236e+00  -4.5135119e+00  -2.6426363e+00
   2.0296556e+01  -2.5534537e+01   3.0000000e+02   2.8754106e+00  -4.4714744e+00  -3.0177497e+00
   2.0337006e+01  -2.5658872e+01   3.0000000e+02   2.5046075e+00  -4.4154063e+00  -3.3759982e+00
   2.0386124e+01  -2.5780658e+01   3.0000000e+02   2.1247009e+00  -4.3424904e+00  -3.7165308e+00
   2.0443739e+01  -2.5899405e+01   3.0000000e+02   1.7389360e+00  -4.2498835e+00  -4.0385385e+00
   2.0509646e+01  -2.6014637e+01   3.0000000e+02   1.3502868e+00  -4.1348230e+00  -4.3410800e+00
   2.0583602e+01  -2.6125888e+01   3.0000000e+02   9.6151581e-01  -3.9947874e+00  -4.6229087e+00
   2.0665331e+01  -2.6232708e+01   3.0000000e+02   5.7523227e-01  -3.8276714e+00  -4.8824060e+00
   2.0754524e+01  -2.6334661e+01   3.0000000e+02   1.9398247e-01  -3.6319636e+00  -5.1175765e+00
   2.0850836e+01  -2.6431334e+01   3.0000000e+02  -1.7971506e-01  -3.4068891e+00  -5.3261233e+00
   2.0953892e+01  -2.6522331e+01   3.0000000e+02  -5.4334363e-01  -3.1525006e+00  -5.5056003e+00
   2.1063287e+01  -2.6607279e+01   3.0000000e+02  -8.9445052e-01  -2.8697063e+00  -5.6535800e+00
   2.1178586e+01  -2.6685829e+01   3.0000000e+02  -1.2307397e+00  -2.5602514e+00  -5.7678151e+00
   2.1299326e+01  -2.6757658e+01   3.0000000e+02  -1.5501925e+00  -2.2266623e+00  -5.8463806e+00
   2.1425020e+01  -2.6822469e+01   3.0000000e+02  -1.8511803e+00  -1.8721735e+00  -5.8877898e+00
   2.1555157e+01  -2.6879996e+01   3.0000000e+02  -2.1325546e+00  -1.5006573e+00  -5.8910784e+00
   2.1689206e+01  -2.6929998e+01   3.0000000e+02  -2.3936643e+00  -1.1165614e+00  -5.8559041e+00
   2.1826617e+01  -2.6972270e+01   3.0000000e+02  -2.6343576e+00  -7.2482750e-01  -5.7826243e+00
   2.1966823e+01  -2.7006635e+01   3.0000000e+02  -2.8548883e+00  -3.3081175e-01  -5.6724151e+00
   2.2109244e+01  -2.7032950e+01   3.0000000e+02  -3.0558197e+00   5.9853146e-02  -5.5273647e+00
   2.2253289e+01  -2.7051107e+01   3.0000000e+02  -3.2378919e+00   4.4143137e-01  -5.3505479e+00
   2.2398361e+01  -2.7061029e+01   3.0000000e+02  -3.4018841e+00   8.0830555e-01  -5.1460582e+00
   2.2543856e+01  -2.7062675e+01   3.0000000e+02  -3.5485058e+00   1.1552265e+00  -4.9189465e+00
   2.2689169e+01  -2.7056037e+01   3.0000000e+02  -3.6783167e+00   1.4775760e+00  -4.6750766e+00
   2.2833694e+01  -2.7041145e+01   3.0000000e+02  -3.7917010e+00   1.7715923e+00  -4.4208749e+00
   2.2976832e+01  -2.7018060e+01   3.0000000e+02  -3.8888822e+00   2.0345314e+00  -4.1630283e+00
   2.3117987e+01  -2.6986877e+01   3.0000000e+02  -3.9699842e+00   2.2647186e+00  -3.9081504e+00
   2.3256577e+01  -2.6947727e+01   3.0000000e+02  -4.0351303e+00   2.4615261e+00  -3.6624366e+00
   2.3392029e+01  -2.6900773e+01   3.0000000e+02  -4.0845264e+00   2.6252261e+00  -3.4314411e+00
   2.3523785e+01  -2.6846208e+01   3.0000000e+02  -4.1185401e+00   2.7568092e+00  -3.2199183e+00
   2.3651306e+01  -2.6784261e+01   3.0000000e+02  -4.1377505e+00   2.8577851e+00  -3.0317421e+00
   2.3774074e+01  -2.6715185e+01   3.0000000e+02  -4.1429319e+00   2.9299781e+00  -2.8699740e+00
   2.3891591e+01  -2.6639268e+01   3.0000000e+02  -4.1350140e+00   2.9753767e+00  -2.7369254e+00
   2.4003384e+01  -2.6556821e+01   3.0000000e+02  -4.1149821e+00   2.9960159e+00  -2.6342942e+00
   2.4109009e+01  -2.6468184e+01   3.0000000e+02  -4.0837690e+00   2.9939104e+00  -2.5632376e+00
   2.4208047e+01  -2.6373721e+01   3.0000000e+02  -4.0421222e+00   2.9710015e+00  -2.5244731e+00
   2.4300111e+01  -2.6273816e+01   3.0000000e+02  -3.9904880e+00   2.9291232e+00  -2.5182978e+00
   2.4384844e+01  -2.6168879e+01   3.0000000e+02  -3.9289283e+00   2.8699696e+00  -2.5445669e+00
   2.4461924e+01  -2.6059335e+01   3.0000000e+02  -3.8570629e+00   2.7950417e+00  -2.6026658e+00
   2.4531059e+01  -2.5945630e+01   3.0000000e+02  -3.7740745e+00   2.7055923e+00  -2.6914467e+00
   2.4591995e+01  -2.5828222e+01   3.0000000e+02  -3.6787589e+00   2.6025528e+00  -2.8091630e+00
   2.4644510e+01  -2.5707585e+01   3.0000000e+02  -3.5696298e+00   2.4864680e+00  -2.9534239e+00
   2.4688422e+01  -2.5584204e+01   3.0000000e+02  -3.4450641e+00   2.3574370e+00  -3.1211557e+00
   2.4723581e+01  -2.5458573e+01   3.0000000e+02  -3.3034592e+00   2.2150789e+00  -3.3086324e+00
   2.4749874e+01  -2.5331192e+01   3.0000000e+02  -3.1434049e+00   2.0585404e+00  -3.5115046e+00
   2.4767226e+01  -2.5202570e+01   3.0000000e+02  -2.9638462e+00   1.8865619e+00  -3.7248581e+00
   2.4775596e+01  -2.5073216e+01   3.0000000e+02  -2.7641921e+00   1.6975817e+00  -3.9433306e+00
   2.4774981e+01  -2.4943641e+01   3.0000000e+02  -2.5444128e+00   1.4899094e+00  -4.1611959e+00
   2.4765409e+01  -2.4814356e+01   3.0000000e+02  -2.3050813e+00   1.2619277e+00  -4.3724885e+00
   2.4746948e+01  -2.4685869e+01   3.0000000e+02  -2.0474072e+00   1.0123209e+00  -4.5710974e+00
   2.4719697e+01  -2.4558683e+01   3.0000000e+02  -1.7732266e+00   7.4028434e-01  -4.7509101e+00
   2.4683788e+01  -2.4433295e+01   3.0000000e+02  -1.4849931e+00   4.4570753e-01  -4.9059536e+00
   2.4639386e+01  -2.4310193e+01   3.0000000e+02  -1.1857430e+00   1.2929560e-01  -5.0305735e+00
   2.4586688e+01  -2.4189855e+01   3.0000000e+02  -8.7903127e-01  -2.0738018e-01  -5.1196408e+00
   2.4525921e+01  -2.4072746e+01   3.0000000e+02  -5.6881905e-01  -5.6191568e-01  -5.1687723e+00
   2.4457340e+01  -2.3959319e+01   3.0000000e+02  -2.5932074e-01  -9.3117121e-01  -5.1745334e+00
   2.4381229e+01  -2.3850011e+01   3.0000000e+02   4.5191631e-02  -1.3114310e+00  -5.1345915e+00
   2.4297899e+01  -2.3745241e+01   3.0000000e+02   3.4060797e-01  -1.6985983e+00  -5.0477993e+00
   2.4207686e+01  -2.3645412e+01   3.0000000e+02   6.2319354e-01  -2.0883931e+00  -4.9141982e+00
   2.4110948e+01  -2.3550906e+01   3.0000000e+02   8.8978855e-01  -2.4765594e+00  -4.7349341e+00
   2.4008069e+01  -2.3462082e+01   3.0000000e+02   1.1379485e+00  -2.8590229e+00  -4.5121146e+00
   2.3899452e+01  -2.3379281e+01   3.0000000e+02   1.3660560e+00  -3.2320201e+00  -4.2486338e+00
   2.3785519e+01  -2.3302816e+01   3.0000000e+02   1.5733815e+00  -3.5921967e+00  -3.9479586e+00
   2.3666711e+01  -2.3232978e+01   3.0000000e+02   1.7600924e+00  -3.9366288e+00  -3.6139456e+00
   2.3543485e+01  -2.3170032e+01   3.0000000e+02   1.9272330e+00  -4.2628243e+00  -3.2506598e+00
   2.3416313e+01  -2.3114217e+01   3.0000000e+02   2.0766603e+00  -4.5686752e+00  -2.8622356e+00
   2.3285681e+01  -2.3065743e+01   3.0000000e+02   2.2109409e+00  -4.8523872e+00  -2.4527755e+00
   2.3152084e+01  -2.3024795e+01   3.0000000e+02   2.3332192e+00  -5.1123911e+00  -2.0263055e+00
   2.3016028e+01  -2.2991526e+01   3.0000000e+02   2.4470390e+00  -5.3472570e+00  -1.5867733e+00
   2.2878028e+01  -2.2966062e+01   3.0000000e+02   2.5561564e+00  -5.5556160e+00  -1.1381192e+00
   2.2738605e+01  -2.2948500e+01   3.0000000e+02   2.6643405e+00  -5.7361204e+00  -6.8437062e-01
   2.2598284e+01  -2.2938904e+01   3.0000000e+02   2.7751711e+00  -5.8874437e+00  -2.2976858e-01
   2.2457593e+01  -2.2937313e+01   3.0000000e+02   2.8918686e+00  -6.0083197e+00   2.2105974e-01
   2.2317061e+01  -2.2943731e+01   3.0000000e+02   3.0171211e+00  -6.0976550e+00   6.6298399e-01
   2.2177218e+01  -2.2958135e+01   3.0000000e+02   3.1529631e+00  -6.1546797e+00   1.0902441e+00
   2.2038590e+01  -2.2980470e+01   3.0000000e+02   3.3006636e+00  -6.1791517e+00   1.4964463e+00
   2.1901700e+01  -2.3010651e+01   3.0000000e+02   3.4606434e+00  -6.1715656e+00   1.8746247e+00
   2.1767065e+01  -2.3048566e+01   3.0000000e+02   3.6324247e+00  -6.1333391e+00   2.2174320e+00
   2.1635195e+01  -2.3094070e+01   3.0000000e+02   3.8145854e+00  -6.0669394e+00   2.5174642e+00
   2.1506590e+01  -2.3146993e+01   3.0000000e+02   4.0047776e+00  -5.9758960e+00   2.7676409e+00
   2.1381739e+01  -2.3207133e+01   3.0000000e+02   4.1997531e+00  -5.8647040e+00   2.9616675e+00
   2.1261121e+01  -2.3274263e+01   3.0000000e+02   4.3954650e+00  -5.7386005e+00   3.0944352e+00
   2.0628649e+01  -2.3624577e+01   3.0000000e+02   5.1453040e+00  -4.9661624e+00   3.4244833e+00
   2.0542963e+01  -2.3726459e+01   3.0000000e+02   5.2539456e+00  -4.8575653e+00   3.1846559e+00
   2.0463818e+01  -2.3832726e+01   3.0000000e+02   5.3316343e+00  -4.7655011e+00   2.8981564e+00
   2.0391495e+01  -2.3943022e+01   3.0000000e+02   5.3753979e+00  -4.6904229e+00   2.5715592e+00
   2.0326254e+01  -2.4056978e+01   3.0000000e+02   5.3831062e+00  -4.6318717e+00   2.2117152e+00
   2.0268331e+01  -2.4174209e+01   3.0000000e+02   5.3534793e+00  -4.5886214e+00   1.8254665e+00
   2.0217943e+01  -2.4294321e+01   3.0000000e+02   5.2860436e+00  -4.5588604e+00   1.4193545e+00
   2.0175281e+01  -2.4416908e+01   3.0000000e+02   5.1810500e+00  -4.5403666e+00   9.9947711e-01
   2.0140511e+01  -2.4541555e+01   3.0000000e+02   5.0393797e+00  -4.5306785e+00   5.7137643e-01
   2.0113776e+01  -2.4667837e+01   3.0000000e+02   4.8624593e+00  -4.5272399e+00   1.4000290e-01
   2.0095189e+01  -2.4795325e+01   3.0000000e+02   4.6521864e+00  -4.5275013e+00  -2.9028345e-01
   2.0084841e+01  -2.4923582e+01   3.0000000e+02   4.4108880e+00  -4.5289901e+00  -7.1569543e-01
   2.0082791e+01  -2.5052169e+01   3.0000000e+02   4.1412717e+00  -4.5293307e+00  -1.1329949e+00
   2.0089074e+01  -2.5180644e+01   3.0000000e+02   3.8463824e+00  -4.5262397e+00  -1.5395013e+00
   2.0103693e+01  -2.5308563e+01   3.0000000e+02   3.5295351e+00  -4.5174871e+00  -1.9330703e+00
   2.0126625e+01  -2.5435483e+01   3.0000000e+02   3.1942146e+00  -4.5008469e+00  -2.3121060e+00
   2.0157816e+01  -2.5560964e+01   3.0000000e+02   2.8439537e+00  -4.4740417e+00  -2.6755077e+00
   2.0197183e+01  -2.5684569e+01   3.0000000e+02   2.4822090e+00  -4.4347017e+00  -3.0225868e+00
   2.0244615e+01  -2.5805866e+01   3.0000000e+02   2.1122450e+00  -4.3803513e+00  -3.3529374e+00
   2.0299970e+01  -2.5924428e+01   3.0000000e+02   1.7370618e+00  -4.3084370e+00  -3.6662528e+00
   2.0363078e+01  -2.6039840e+01   3.0000000e+02   1.3593514e+00  -4.2163984e+00  -3.9621523e+00
   2.0433738e+01  -2.6151694e+01   3.0000000e+02   9.8154762e-01  -4.1017901e+00  -4.2399916e+00
   2.0511723e+01  -2.6259594e+01   3.0000000e+02   6.0588608e-01  -3.9624272e+00  -4.4987602e+00
   2.0596777e+01  -2.6363157e+01   3.0000000e+02   2.3450070e-01  -3.7965443e+00  -4.7370214e+00
   2.0688616e+01  -2.6462014e+01   3.0000000e+02  -1.3049058e-01  -3.6029384e+00  -4.9529442e+00
   2.0786929e+01  -2.6555812e+01   3.0000000e+02  -4.8693925e-01  -3.3810732e+00  -5.1444032e+00
   2.0891382e+01  -2.6644216e+01   3.0000000e+02  -8.3267492e-01  -3.1311283e+00  -5.3091235e+00
   2.1001613e+01  -2.6726907e+01   3.0000000e+02  -1.1655490e+00  -2.8540180e+00  -5.4448207e+00
   2.1117239e+01  -2.6803589e+01   3.0000000e+02  -1.4835556e+00  -2.5513459e+00  -5.5493457e+00
   2.1237854e+01  -2.6873984e+01   3.0000000e+02  -1.7849295e+00  -2.2253688e+00  -5.6207925e+00
   2.1363032e+01  -2.6937839e+01   3.0000000e+02  -2.0682744e+00  -1.8789377e+00  -5.6575795e+00
   2.1492327e+01  -2.6994921e+01   3.0000000e+02  -2.3326268e+00  -1.5154677e+00  -5.6585294e+00
   2.1625278e+01  -2.7045024e+01   3.0000000e+02  -2.5775122e+00  -1.1388909e+00  -5.6229413e+00
   2.1761406e+01  -2.7087966e+01   3.0000000e+02  -2.8029198e+00  -7.5363753e-01  -5.5506885e+00
   2.1900221e+01  -2.7123590e+01   3.0000000e+02  -3.0092522e+00  -3.6456957e-01  -5.4423349e+00
   2.2041219e+01  -2.7151766e+01   3.0000000e+02  -3.1972298e+00   2.3097240e-02  -5.2992547e+00
   2.2183888e+01  -2.7172392e+01   3.0000000e+02  -3.3677771e+00   4.0394154e-01  -5.1237419e+00
   2.2327710e+01  -2.7185392e+01   3.0000000e+02  -3.5218913e+00   7.7252322e-01  -4.9190858e+00
   2.2472160e+01  -2.7190719e+01   3.0000000e+02  -3.6605239e+00   1.1236126e+00  -4.6895750e+00
   2.2616712e+01  -2.7188354e+01   3.0000000e+02  -3.7844854e+00   1.4524558e+00  -4.4404129e+00
   2.2760838e+01  -2.7178304e+01   3.0000000e+02  -3.8943806e+00   1.7550133e+00  -4.1775502e+00
   2.2904013e+01  -2.7160607e+01   3.0000000e+02  -3.9906023e+00   2.0281724e+00  -3.9073995e+00
   2.3045716e+01  -2.7135328e+01   3.0000000e+02  -4.0733550e+00   2.2698625e+00  -3.6365244e+00
   2.3185431e+01  -2.7102558e+01   3.0000000e+02  -4.1427213e+00   2.4790740e+00  -3.3713084e+00
   2.3322653e+01  -2.7062417e+01   3.0000000e+02  -4.1987563e+00   2.6557912e+00  -3.1176317e+00
   2.3456885e+01  -2.7015051e+01   3.0000000e+02  -4.2415732e+00   2.8008240e+00  -2.8806639e+00
   2.3587643e+01  -2.6960633e+01   3.0000000e+02  -4.2714229e+00   2.9156110e+00  -2.6647223e+00
   2.3714460e+01  -2.6899360e+01   3.0000000e+02  -4.2887380e+00   3.0020061e+00  -2.4732418e+00
   2.3836884e+01  -2.6831455e+01   3.0000000e+02  -4.2941388e+00   3.0620846e+00  -2.3088304e+00
   2.3954480e+01  -2.6757162e+01   3.0000000e+02  -4.2883957e+00   3.0979925e+00  -2.1733878e+00
   2.4066835e+01  -2.6676751e+01   3.0000000e+02  -4.2723665e+00   3.1118509e+00  -2.0682020e+00
   2.4173557e+01  -2.6590510e+01   3.0000000e+02  -4.2468952e+00   3.1056903e+00  -1.9940979e+00
   2.4274276e+01  -2.6498750e+01   3.0000000e+02  -4.2127112e+00   3.0814247e+00  -1.9515097e+00
   2.4368646e+01  -2.6401800e+01   3.0000000e+02  -4.1703237e+00   3.0408343e+00  -1.9405424e+00
   2.4456347e+01  -2.6300007e+01   3.0000000e+02  -4.1199360e+00   2.9855535e+00  -1.9609793e+00
   2.4537086e+01  -2.6193732e+01   3.0000000e+02  -4.0613838e+00   2.9170470e+00  -2.0122710e+00
   2.4610595e+01  -2.6083355e+01   3.0000000e+02  -3.9941176e+00   2.8365810e+00  -2.0934864e+00
   2.4676637e+01  -2.5969265e+01   3.0000000e+02  -3.9172161e+00   2.7451719e+00  -2.2032720e+00
   2.4734999e+01  -2.5851867e+01   3.0000000e+02  -3.8294502e+00   2.6435387e+00  -2.3398062e+00
   2.4785500e+01  -2.5731573e+01   3.0000000e+02  -3.7293767e+00   2.5320403e+00  -2.5007661e+00
   2.4827988e+01  -2.5608807e+01   3.0000000e+02  -3.6154655e+00   2.4106335e+00  -2.6833109e+00
   2.4862338e+01  -2.5483997e+01   3.0000000e+02  -3.4862237e+00   2.2788370e+00  -2.8841192e+00
   2.4888458e+01  -2.5357578e+01   3.0000000e+02  -3.3403371e+00   2.1357367e+00  -3.0993999e+00
   2.4906283e+01  -2.5229992e+01   3.0000000e+02  -3.1767797e+00   1.9800287e+00  -3.3249597e+00
   2.4915777e+01  -2.5101678e+01   3.0000000e+02  -2.9948905e+00   1.8100946e+00  -3.5562780e+00
   2.4916933e+01  -2.4973082e+01   3.0000000e+02  -2.7944474e+00   1.6241469e+00  -3.7885425e+00
   2.4909775e+01  -2.4844645e+01   3.0000000e+02  -2.5756886e+00   1.4203834e+00  -4.0167215e+00
   2.4894352e+01  -2.4716810e+01   3.0000000e+02  -2.3393375e+00   1.1971875e+00  -4.2356128e+00
   2.4870742e+01  -2.4590012e+01   3.0000000e+02  -2.0866088e+00   9.5331009e-01  -4.4399070e+00
   2.4839050e+01  -2.4464685e+01   3.0000000e+02  -1.8192355e+00   6.8805831e-01  -4.6242602e+00
   2.4799409e+01  -2.4341255e+01   3.0000000e+02  -1.5394722e+00   4.0142547e-01  -4.7834189e+00
   2.4751974e+01  -2.4220141e+01   3.0000000e+02  -1.2500826e+00   9.4171807e-02  -4.9123867e+00
   2.4696929e+01  -2.4101753e+01   3.0000000e+02  -9.5431059e-01  -2.3214922e-01  -5.0066084e+00
   2.4634479e+01  -2.3986490e+01   3.0000000e+02  -6.5577841e-01  -5.7524733e-01  -5.0621880e+00
   2.4564853e+01  -2.3874741e+01   3.0000000e+02  -3.5836028e-01  -9.3218929e-01  -5.0760728e+00
   2.4488303e+01  -2.3766879e+01   3.0000000e+02  -6.5999378e-02  -1.2995556e+00  -5.0461946e+00
   2.4405102e+01  -2.3663268e+01   3.0000000e+02   2.1747896e-01  -1.6735967e+00  -4.9715474e+00
   2.4315542e+01  -2.3564252e+01   3.0000000e+02   4.8857407e-01  -2.0504352e+00  -4.8521769e+00
   2.4219935e+01  -2.3470163e+01   3.0000000e+02   7.4426390e-01  -2.4262136e+00  -4.6891135e+00
   2.4118612e+01  -2.3381312e+01   3.0000000e+02   9.8214615e-01  -2.7972579e+00  -4.4842367e+00
   2.4011919e+01  -2.3297997e+01   3.0000000e+02   1.2005313e+00  -3.1601817e+00  -4.2401208e+00
   2.3900219e+01  -2.3220492e+01   3.0000000e+02   1.3985007e+00  -3.5119778e+00  -3.9598431e+00
   2.3783890e+01  -2.3149056e+01   3.0000000e+02   1.5759291e+00  -3.8500394e+00  -3.6468204e+00
   2.3663323e+01  -2.3083923e+01   3.0000000e+02   1.7334840e+00  -4.1721741e+00  -3.3046270e+00
   2.3538921e+01  -2.3025309e+01   3.0000000e+02   1.8725910e+00  -4.4765498e+00  -2.9368688e+00
   2.3411099e+01  -2.2973408e+01   3.0000000e+02   1.9953678e+00  -4.7616277e+00  -2.5470765e+00
   2.3280279e+01  -2.2928390e+01   3.0000000e+02   2.1045303e+00  -5.0260805e+00  -2.1386331e+00
   2.3146896e+01  -2.2890403e+01   3.0000000e+02   2.2032574e+00  -5.2686810e+00  -1.7147837e+00
   2.3011388e+01  -2.2859574e+01   3.0000000e+02   2.2950512e+00  -5.4882287e+00  -1.2786556e+00
   2.2874203e+01  -2.2836002e+01   3.0000000e+02   2.3835525e+00  -5.6834779e+00  -8.3334740e-01
   2.2735790e+01  -2.2819766e+01   3.0000000e+02   2.4723860e+00  -5.8531073e+00  -3.8204720e-01
   2.2596604e+01  -2.2810919e+01   3.0000000e+02   2.5649838e+00  -5.9957260e+00   7.1816119e-02
   2.2457102e+01  -2.2809489e+01   3.0000000e+02   2.6644413e+00  -6.1099331e+00   5.2442189e-01
   2.2317740e+01  -2.2815482e+01   3.0000000e+02   2.7733984e+00  -6.1944248e+00   9.7141262e-01
   2.2178975e+01  -2.2828878e+01   3.0000000e+02   2.8939264e+00  -6.2481524e+00   1.4077851e+00
   2.2041264e+01  -2.2849633e+01   3.0000000e+02   3.0274493e+00  -6.2705154e+00   1.8278416e+00
   2.1905057e+01  -2.2877679e+01   3.0000000e+02   3.1746810e+00  -6.2615726e+00   2.2252552e+00
   2.1770803e+01  -2.2912923e+01   3.0000000e+02   3.3355677e+00  -6.2222323e+00   2.5931970e+00
   2.1638945e+01  -2.2955249e+01   3.0000000e+02   3.5092584e+00  -6.1543921e+00   2.9245960e+00
   2.1509917e+01  -2.3004519e+01   3.0000000e+02   3.6940911e+00  -6.0609902e+00   3.2124803e+00
   2.1384148e+01  -2.3060570e+01   3.0000000e+02   3.8875918e+00  -5.9459571e+00   3.4503562e+00
   2.1262056e+01  -2.3123216e+01   3.0000000e+02   4.0865218e+00  -5.8140502e+00   3.6326146e+00
   2.1144048e+01  -2.3192253e+01   3.0000000e+02   4.2869683e+00  -5.6705965e+00   3.7548650e+00
   2.1030521e+01  -2.3267450e+01   3.0000000e+02   4.4844434e+00  -5.5211817e+00   3.8142366e+00
   2.0921856e+01  -2.3348559e+01   3.0000000e+02   4.6740693e+00  -5.3713016e+00   3.8095326e+00
   2.0818423e+01  -2.3435312e+01   3.0000000e+02   4.8507623e+00  -5.2260474e+00   3.7412790e+00
   2.0720575e+01  -2.3527420e+01   3.0000000e+02   5.0094505e+00  -5.0898271e+00   3.6116891e+00
   2.0199822e+01  -2.4001405e+01   3.0000000e+02   5.3617464e+00  -4.4759150e+00   2.7730480e+00
   2.0141510e+01  -2.4118786e+01   3.0000000e+02   5.3467302e+00  -4.4388047e+00   2.3874199e+00
   2.0090327e+01  -2.4238925e+01   3.0000000e+02   5.2951209e+00  -4.4161168e+00   1.9828971e+00
   2.0046449e+01  -2.4361457e+01   3.0000000e+02   5.2070037e+00  -4.4056004e+00   1.5651668e+00
   2.0010028e+01  -2.4486012e+01   3.0000000e+02   5.0830315e+00  -4.4048045e+00   1.1393977e+00
   1.9981199e+01  -2.4612209e+01   3.0000000e+02   4.9243534e+00  -4.4112145e+00   7.1023168e-01
   1.9960072e+01  -2.4739664e+01   3.0000000e+02   4.7325511e+00  -4.4223457e+00   2.8179062e-01
   1.9946734e+01  -2.4867988e+01   3.0000000e+02   4.5096080e+00  -4.4358091e+00  -1.4228826e-01
   1.9941251e+01  -2.4996785e+01   3.0000000e+02   4.2578968e+00  -4.4493439e+00  -5.5883080e-01
   1.9943665e+01  -2.5125660e+01   3.0000000e+02   3.9801448e+00  -4.4608163e+00  -9.6514549e-01
   1.9953993e+01  -2.5254214e+01   3.0000000e+02   3.6794034e+00  -4.4681920e+00  -1.3590204e+00
   1.9972227e+01  -2.5382048e+01   3.0000000e+02   3.3589705e+00  -4.4694931e+00  -1.7387584e+00
   1.9998337e+01  -2.5508767e+01   3.0000000e+02   3.0222749e+00  -4.4627419e+00  -2.1032000e+00
   2.0032267e+01  -2.5633974e+01   3.0000000e+02   2.6727649e+00  -4.4459032e+00  -2.4516659e+00
   2.0073934e+01  -2.5757277e+01   3.0000000e+02   2.3137587e+00  -4.4168405e+00  -2.7838878e+00
   2.0123232e+01  -2.5878290e+01   3.0000000e+02   1.9483261e+00  -4.3732988e+00  -3.0998834e+00
   2.0180029e+01  -2.5996631e+01   3.0000000e+02   1.5792235e+00  -4.3129240e+00  -3.3997659e+00
   2.0244169e+01  -2.6111927e+01   3.0000000e+02   1.2088626e+00  -4.2333258e+00  -3.6835605e+00
   2.0315471e+01  -2.6223812e+01   3.0000000e+02   8.3935974e-01  -4.1321827e+00  -3.9510192e+00
   2.0393729e+01  -2.6331930e+01   3.0000000e+02   4.7261767e-01  -4.0073770e+00  -4.2014907e+00
   2.0478713e+01  -2.6435937e+01   3.0000000e+02   1.1043245e-01  -3.8571376e+00  -4.4338623e+00
   2.0570170e+01  -2.6535500e+01   3.0000000e+02  -2.4539734e-01  -3.6801734e+00  -4.6465787e+00
   2.0667823e+01  -2.6630299e+01   3.0000000e+02  -5.9300364e-01  -3.4757724e+00  -4.8377245e+00
   2.0771375e+01  -2.6720030e+01   3.0000000e+02  -9.3044153e-01  -3.2438500e+00  -5.0051596e+00
   2.0880505e+01  -2.6804403e+01   3.0000000e+02  -1.2557191e+00  -2.9849662e+00  -5.1466510e+00
   2.0994874e+01  -2.6883145e+01   3.0000000e+02  -1.5668981e+00  -2.7002919e+00  -5.2600111e+00
   2.1114122e+01  -2.6956002e+01   3.0000000e+02  -1.8622105e+00  -2.3915733e+00  -5.3431871e+00
   2.1237872e+01  -2.7022735e+01   3.0000000e+02  -2.1401706e+00  -2.0610937e+00  -5.3943463e+00
   2.1365730e+01  -2.7083129e+01   3.0000000e+02  -2.3996950e+00  -1.7116434e+00  -5.4119202e+00
   2.1497286e+01  -2.7136986e+01   3.0000000e+02  -2.6401485e+00  -1.3465201e+00  -5.3946782e+00
   2.1632116e+01  -2.7184130e+01   3.0000000e+02  -2.8613767e+00  -9.6952294e-01  -5.3418047e+00
   2.1769783e+01  -2.7224407e+01   3.0000000e+02  -3.0636800e+00  -5.8494360e-01  -5.2530106e+00
   2.1909840e+01  -2.7257685e+01   3.0000000e+02  -3.2477500e+00  -1.9752649e-01  -5.1286691e+00
   2.2051831e+01  -2.7283854e+01   3.0000000e+02  -3.4145728e+00   1.8761146e-01  -4.9699614e+00
   2.2195291e+01  -2.7302829e+01   3.0000000e+02  -3.5653135e+00   5.6511685e-01  -4.7790037e+00
   2.2339751e+01  -2.7314548e+01   3.0000000e+02  -3.7011900e+00   9.2960132e-01  -4.5589393e+00
   2.2484736e+01  -2.7318972e+01   3.0000000e+02  -3.8233492e+00   1.2758762e+00  -4.3139628e+00
   2.2629772e+01  -2.7316086e+01   3.0000000e+02  -3.9327739e+00   1.5992356e+00  -4.0492365e+00
   2.2774382e+01  -2.7305899e+01   3.0000000e+02  -4.0302134e+00   1.8957034e+00  -3.7707221e+00
   2.2918092e+01  -2.7288447e+01   3.0000000e+02  -4.1161662e+00   2.1622587e+00  -3.4848944e+00
   2.3060430e+01  -2.7263784e+01   3.0000000e+02  -4.1908933e+00   2.3969539e+00  -3.1984388e+00
   2.3200932e+01  -2.7231994e+01   3.0000000e+02  -4.2544898e+00   2.5989580e+00  -2.9178500e+00
   2.3339140e+01  -2.7193180e+01   3.0000000e+02  -4.3069595e+00   2.7684627e+00  -2.6491495e+00
   2.3474603e+01  -2.7147468e+01   3.0000000e+02  -4.3483115e+00   2.9065214e+00  -2.3976256e+00
   2.3606883e+01  -2.7095010e+01   3.0000000e+02  -4.3786482e+00   3.0148397e+00  -2.1676589e+00
   2.3735554e+01  -2.7035976e+01   3.0000000e+02  -4.3982188e+00   3.0955368e+00  -1.9627095e+00
   2.3860202e+01  -2.6970559e+01   3.0000000e+02  -4.4074489e+00   3.1509376e+00  -1.7853494e+00
   2.3980429e+01  -2.6898972e+01   3.0000000e+02  -4.4069291e+00   3.1834083e+00  -1.6373718e+00
   2.4095855e+01  -2.6821447e+01   3.0000000e+02  -4.3973696e+00   3.1952415e+00  -1.5199286e+00
   2.4206117e+01  -2.6738237e+01   3.0000000e+02  -4.3795301e+00   3.1885913e+00  -1.4336680e+00
   2.4310869e+01  -2.6649610e+01   3.0000000e+02  -4.3541265e+00   3.1654444e+00  -1.3788724e+00
   2.4409789e+01  -2.6555852e+01   3.0000000e+02  -4.3217422e+00   3.1276176e+00  -1.3555079e+00
   2.4502573e+01  -2.6457265e+01   3.0000000e+02  -4.2827372e+00   3.0767591e+00  -1.3632938e+00
   2.4588941e+01  -2.6354166e+01   3.0000000e+02  -4.2371796e+00   3.0143497e+00  -1.4016942e+00
   2.4668634e+01  -2.6246885e+01   3.0000000e+02  -4.1847988e+00   2.9416937e+00  -1.4699138e+00
   2.4741417e+01  -2.6135763e+01   3.0000000e+02  -4.1249736e+00   2.8598972e+00  -1.5668577e+00
   2.4807080e+01  -2.6021155e+01   3.0000000e+02  -4.0567604e+00   2.7698377e+00  -1.6910786e+00
   2.4865436e+01  -2.5903424e+01   3.0000000e+02  -3.9789465e+00   2.6721198e+00  -1.8407624e+00
   2.4916324e+01  -2.5782941e+01   3.0000000e+02  -3.8901406e+00   2.5670286e+00  -2.0136971e+00
   2.4959606e+01  -2.5660088e+01   3.0000000e+02  -3.7888831e+00   2.4544903e+00  -2.2072694e+00
   2.4995171e+01  -2.5535249e+01   3.0000000e+02  -3.6737535e+00   2.3340321e+00  -2.4184949e+00
   2.5022932e+01  -2.5408816e+01   3.0000000e+02  -3.5434836e+00   2.2047778e+00  -2.6440442e+00
   2.5042827e+01  -2.5281183e+01   3.0000000e+02  -3.3970401e+00   2.0654627e+00  -2.8802993e+00
   2.5054820e+01  -2.5152747e+01   3.0000000e+02  -3.2336913e+00   1.9144920e+00  -3.1233913e+00
   2.5058898e+01  -2.5023907e+01   3.0000000e+02  -3.0530410e+00   1.7500378e+00  -3.3692447e+00
   2.5055074e+01  -2.4895061e+01   3.0000000e+02  -2.8550471e+00   1.5701700e+00  -3.6135942e+00
   2.5043384e+01  -2.4766605e+01   3.0000000e+02  -2.6400282e+00   1.3730170e+00  -3.8519986e+00
   2.5023889e+01  -2.4638934e+01   3.0000000e+02  -2.4086850e+00   1.1569451e+00  -4.0798389e+00
   2.4996672e+01  -2.4512440e+01   3.0000000e+02  -2.1621231e+00   9.2072993e-01  -4.2923481e+00
   2.4961839e+01  -2.4387508e+01   3.0000000e+02  -1.9018891e+00   6.6370384e-01  -4.4846701e+00
   2.4919517e+01  -2.4264519e+01   3.0000000e+02  -1.6300124e+00   3.8587553e-01  -4.6519661e+00
   2.4869858e+01  -2.4143846e+01   3.0000000e+02  -1.3490263e+00   8.7993276e-02  -4.7895718e+00
   2.4813030e+01  -2.4025855e+01   3.0000000e+02  -1.0619332e+00  -2.2845440e-01  -4.8932083e+00
   2.4749225e+01  -2.3910902e+01   3.0000000e+02  -7.7214133e-01  -5.6128419e-01  -4.9591830e+00
   2.4678653e+01  -2.3799333e+01   3.0000000e+02  -4.8332805e-01  -9.0772293e-01  -4.9845858e+00
   2.4601542e+01  -2.3691484e+01   3.0000000e+02  -1.9927325e-01  -1.2645428e+00  -4.9674290e+00
   2.4518139e+01  -2.3587677e+01   3.0000000e+02   7.6327578e-02  -1.6282239e+00  -4.9067153e+00
   2.4428707e+01  -2.3488223e+01   3.0000000e+02   3.4004391e-01  -1.9951150e+00  -4.8024382e+00
   2.4333526e+01  -2.3393420e+01   3.0000000e+02   5.8886601e-01  -2.3615904e+00  -4.6555129e+00
   2.4232891e+01  -2.3303550e+01   3.0000000e+02   8.2033236e-01  -2.7241956e+00  -4.4676555e+00
   2.4127110e+01  -2.3218880e+01   3.0000000e+02   1.0326180e+00  -3.0797589e+00  -4.2412310e+00
   2.4016507e+01  -2.3139661e+01   3.0000000e+02   1.2245858e+00  -3.4254646e+00  -3.9790884e+00
   2.3901417e+01  -2.3066128e+01   3.0000000e+02   1.3958263e+00  -3.7589030e+00  -3.6843879e+00
   2.3782186e+01  -2.2998499e+01   3.0000000e+02   1.5466662e+00  -4.0780736e+00  -3.3604375e+00
   2.3659173e+01  -2.2936974e+01   3.0000000e+02   1.6781529e+00  -4.3813459e+00  -3.0105526e+00
   2.3532744e+01  -2.2881734e+01   3.0000000e+02   1.7920222e+00  -4.6674001e+00  -2.6379304e+00
   2.3403276e+01  -2.2832943e+01   3.0000000e+02   1.8906266e+00  -4.9351221e+00  -2.2455869e+00
   2.3271152e+01  -2.2790743e+01   3.0000000e+02   1.9768390e+00  -5.1835099e+00  -1.8363085e+00
   2.3136763e+01  -2.2755261e+01   3.0000000e+02   2.0539310e+00  -5.4115574e+00  -1.4126917e+00
   2.3000505e+01  -2.2726598e+01   3.0000000e+02   2.1254182e+00  -5.6181815e+00  -9.7718505e-01
   2.2862778e+01  -2.2704841e+01   3.0000000e+02   2.1949180e+00  -5.8021525e+00  -5.3222082e-01
   2.2723987e+01  -2.2690053e+01   3.0000000e+02   2.2659818e+00  -5.9620795e+00  -8.0343655e-02
   2.2584540e+01  -2.2682277e+01   3.0000000e+02   2.3419576e+00  -6.0964329e+00   3.7562387e-01
   2.2444845e+01  -2.2681537e+01   3.0000000e+02   2.4258694e+00  -6.2036182e+00   8.3242249e-01
   2.2305312e+01  -2.2687833e+01   3.0000000e+02   2.5203032e+00  -6.2820974e+00   1.2862096e+00
   2.2166349e+01  -2.2701149e+01   3.0000000e+02   2.6273427e+00  -6.3305536e+00   1.7324450e+00
   2.2028364e+01  -2.2721445e+01   3.0000000e+02   2.7484877e+00  -6.3480940e+00   2.1658503e+00
   2.1891764e+01  -2.2748660e+01   3.0000000e+02   2.8846082e+00  -6.3344630e+00   2.5804397e+00
   2.1756948e+01  -2.2782716e+01   3.0000000e+02   3.0359148e+00  -6.2902365e+00   2.9696642e+00
   2.1624315e+01  -2.2823512e+01   3.0000000e+02   3.2019060e+00  -6.2169737e+00   3.3266216e+00
   2.1494256e+01  -2.2870928e+01   3.0000000e+02   3.3813577e+00  -6.1172833e+00   3.6443808e+00
   2.1367156e+01  -2.2924823e+01   3.0000000e+02   3.5723080e+00  -5.9947939e+00   3.9163362e+00
   2.1243394e+01  -2.2985041e+01   3.0000000e+02   3.7720875e+00  -5.8540180e+00   4.1365588e+00
   2.1123337e+01  -2.3051401e+01   3.0000000e+02   3.9773393e+00  -5.7001241e+00   4.3001843e+00
   2.1007347e+01  -2.3123709e+01   3.0000000e+02   4.1841243e+00  -5.5386484e+00   4.4036320e+00
   2.0895771e+01  -2.3201751e+01   3.0000000e+02   4.3880208e+00  -5.3751657e+00   4.4448452e+00
   2.0788949e+01  -2.3285295e+01   3.0000000e+02   4.5842747e+00  -5.2149848e+00   4.4233539e+00
   2.0687205e+01  -2.3374093e+01   3.0000000e+02   4.7679835e+00  -5.0628594e+00   4.3402864e+00
   2.0590851e+01  -2.3467881e+01   3.0000000e+02   4.9342894e+00  -4.9227753e+00   4.1982601e+00
   2.0500185e+01  -2.3566380e+01   3.0000000e+02   5.0785818e+00  -4.7978004e+00   4.0012074e+00
   2.0415492e+01  -2.3669296e+01   3.0000000e+02   5.1966865e+00  -4.6900118e+00   3.7541352e+00
   2.0337036e+01  -2.3776322e+01   3.0000000e+02   5.2850280e+00  -4.6004814e+00   3.4628535e+00
   2.0265068e+01  -2.3887135e+01   3.0000000e+02   5.3407428e+00  -4.5293465e+00   3.1336673e+00
   1.9872619e+01  -2.4456908e+01   3.0000000e+02   5.0740343e+00  -4.2498752e+00   1.6089363e+00
   1.9843646e+01  -2.4582259e+01   3.0000000e+02   4.9283634e+00  -4.2663822e+00   1.1869340e+00
   1.9821870e+01  -2.4708814e+01   3.0000000e+02   4.7507733e+00  -4.2879475e+00   7.6590495e-01
   1.9807371e+01  -2.4836229e+01   3.0000000e+02   4.5429527e+00  -4.3123341e+00   3.4916456e-01
   1.9800211e+01  -2.4964157e+01   3.0000000e+02   4.3069484e+00  -4.3374441e+00  -6.0345499e-02
   1.9800432e+01  -2.5092250e+01   3.0000000e+02   4.0451603e+00  -4.3613210e+00  -4.6006188e-01
   1.9808056e+01  -2.5220157e+01   3.0000000e+02   3.7603280e+00  -4.3821322e+00  -8.4782182e-01
   1.9823087e+01  -2.5347527e+01   3.0000000e+02   3.4554771e+00  -4.3981368e+00  -1.2219218e+00
   1.9845505e+01  -2.5474009e+01   3.0000000e+02   3.1338341e+00  -4.4076335e+00  -1.5811383e+00
   1.9875274e+01  -2.5599254e+01   3.0000000e+02   2.7987054e+00  -4.4089105e+00  -1.9247675e+00
   1.9912332e+01  -2.5722915e+01   3.0000000e+02   2.4533428e+00  -4.4001868e+00  -2.2525634e+00
   1.9956600e+01  -2.5844648e+01   3.0000000e+02   2.1008091e+00  -4.3795759e+00  -2.5646790e+00
   2.0007978e+01  -2.5964113e+01   3.0000000e+02   1.7438704e+00  -4.3450670e+00  -2.8615165e+00
   2.0066343e+01  -2.6080976e+01   3.0000000e+02   1.3849313e+00  -4.2945423e+00  -3.1435448e+00
   2.0131552e+01  -2.6194910e+01   3.0000000e+02   1.0260312e+00  -4.2258334e+00  -3.4111159e+00
   2.0203442e+01  -2.6305592e+01   3.0000000e+02   6.6890906e-01  -4.1368158e+00  -3.6642886e+00
   2.0281830e+01  -2.6412711e+01   3.0000000e+02   3.1508286e-01  -4.0255234e+00  -3.9027056e+00
   2.0366512e+01  -2.6515963e+01   3.0000000e+02  -3.4011568e-02  -3.8902783e+00  -4.1255276e+00
   2.0457264e+01  -2.6615054e+01   3.0000000e+02  -3.7691276e-01  -3.7298063e+00  -4.3314516e+00
   2.0553845e+01  -2.6709702e+01   3.0000000e+02  -7.1205829e-01  -3.5433184e+00  -4.5187951e+00
   2.0655992e+01  -2.6799637e+01   3.0000000e+02  -1.0377492e+00  -3.3305626e+00  -4.6855993e+00
   2.0763428e+01  -2.6884600e+01   3.0000000e+02  -1.3521804e+00  -3.0918237e+00  -4.8297797e+00
   2.0875855e+01  -2.6964348e+01   3.0000000e+02  -1.6535238e+00  -2.8279049e+00  -4.9492199e+00
   2.0992960e+01  -2.7038650e+01   3.0000000e+02  -1.9400328e+00  -2.5400887e+00  -5.0418754e+00
   2.1114417e+01  -2.7107293e+01   3.0000000e+02  -2.2101785e+00  -2.2300970e+00  -5.1058247e+00
   2.1239880e+01  -2.7170077e+01   3.0000000e+02  -2.4627406e+00  -1.9000975e+00  -5.1393042e+00
   2.1368996e+01  -2.7226821e+01   3.0000000e+02  -2.6969146e+00  -1.5526822e+00  -5.1407547e+00
   2.1501393e+01  -2.7277360e+01   3.0000000e+02  -2.9123394e+00  -1.1909219e+00  -5.1088708e+00
   2.1636693e+01  -2.7321546e+01   3.0000000e+02  -3.1091172e+00  -8.1836478e-01  -5.0427004e+00
   2.1774505e+01  -2.7359252e+01   3.0000000e+02  -3.2877820e+00  -4.3906005e-01  -4.9417534e+00
   2.1914431e+01  -2.7390367e+01   3.0000000e+02  -3.4492299e+00  -5.7527595e-02  -4.8061657e+00
   2.2056064e+01  -2.7414799e+01   3.0000000e+02  -3.5946307e+00   3.2131107e-01  -4.6368529e+00
   2.2198993e+01  -2.7432479e+01   3.0000000e+02  -3.7253251e+00   6.9227801e-01  -4.4356447e+00
   2.2342800e+01  -2.7443353e+01   3.0000000e+02  -3.8426908e+00   1.0501135e+00  -4.2054141e+00
   2.2487067e+01  -2.7447391e+01   3.0000000e+02  -3.9480422e+00   1.3897406e+00  -3.9500829e+00
   2.2631371e+01  -2.7444580e+01   3.0000000e+02  -4.0425185e+00   1.7065149e+00  -3.6745923e+00
   2.2775291e+01  -2.7434929e+01   3.0000000e+02  -4.1270227e+00   1.9965088e+00  -3.3847205e+00
   2.2918408e+01  -2.7418466e+01   3.0000000e+02  -4.2021853e+00   2.2567274e+00  -3.0868350e+00
   2.3060304e+01  -2.7395238e+01   3.0000000e+02  -4.2683724e+00   2.4852485e+00  -2.7875710e+00
   2.3200566e+01  -2.7365315e+01   3.0000000e+02  -4.3257344e+00   2.6812721e+00  -2.4934573e+00
   2.3338786e+01  -2.7328783e+01   3.0000000e+02  -4.3742760e+00   2.8450498e+00  -2.2106049e+00
   2.3474565e+01  -2.7285749e+01   3.0000000e+02  -4.4139463e+00   2.9777358e+00  -1.9444117e+00
   2.3607511e+01  -2.7236338e+01   3.0000000e+02  -4.4447222e+00   3.0811659e+00  -1.6994040e+00
   2.3737242e+01  -2.7180694e+01   3.0000000e+02  -4.4666792e+00   3.1576240e+00  -1.4791546e+00
   2.3863387e+01  -2.7118979e+01   3.0000000e+02  -4.4800352e+00   3.2096177e+00  -1.2863095e+00
   2.3985587e+01  -2.7051372e+01   3.0000000e+02  -4.4851634e+00   3.2396941e+00  -1.1226856e+00
   2.4103496e+01  -2.6978068e+01   3.0000000e+02  -4.4825739e+00   3.2503078e+00  -9.8940953e-01
   2.4216785e+01  -2.6899280e+01   3.0000000e+02  -4.4728699e+00   3.2437428e+00  -8.8704918e-01
   2.4325137e+01  -2.6815234e+01   3.0000000e+02  -4.4566798e+00   3.2220747e+00  -8.1578282e-01
   2.4428253e+01  -2.6726171e+01   3.0000000e+02  -4.4345827e+00   3.1871675e+00  -7.7548193e-01
   2.4525851e+01  -2.6632348e+01   3.0000000e+02  -4.4070301e+00   3.1406848e+00  -7.6578427e-01
   2.4617666e+01  -2.6534033e+01   3.0000000e+02  -4.3742717e+00   3.0841032e+00  -7.8614666e-01
   2.4703453e+01  -2.6431505e+01   3.0000000e+02  -4.3362979e+00   3.0187237e+00  -8.3584184e-01
   2.4782984e+01  -2.6325057e+01   3.0000000e+02  -4.2928051e+00   2.9456761e+00  -9.1394223e-01
   2.4856053e+01  -2.6214991e+01   3.0000000e+02  -4.2431853e+00   2.8659085e+00  -1.0192901e+00
   2.4922472e+01  -2.6101616e+01   3.0000000e+02  -4.1865443e+00   2.7801712e+00  -1.1504801e+00
   2.4982074e+01  -2.5985254e+01   3.0000000e+02  -4.1217580e+00   2.6889917e+00  -1.3058042e+00
   2.5034713e+01  -2.5866231e+01   3.0000000e+02  -4.0475412e+00   2.5926382e+00  -1.4832599e+00
   2.5080263e+01  -2.5744879e+01   3.0000000e+02  -3.9625402e+00   2.4910843e+00  -1.6805469e+00
   2.5118620e+01  -2.5621539e+01   3.0000000e+02  -3.8654338e+00   2.3839783e+00  -1.8950730e+00
   2.5149700e+01  -2.5496552e+01   3.0000000e+02  -3.7550130e+00   2.2706158e+00  -2.1240160e+00
   2.5173439e+01  -2.5370266e+01   3.0000000e+02  -3.6302597e+00   2.1499411e+00  -2.3643476e+00
   2.5189795e+01  -2.5243029e+01   3.0000000e+02  -3.4903888e+00   2.0205638e+00  -2.6128849e+00
   2.5198747e+01  -2.5115193e+01   3.0000000e+02  -3.3348741e+00   1.8808166e+00  -2.8663103e+00
   2.5200293e+01  -2.4987107e+01   3.0000000e+02  -3.1634412e+00   1.7288349e+00  -3.1211977e+00
   2.5194453e+01  -2.4859124e+01   3.0000000e+02  -2.9760741e+00   1.5626809e+00  -3.3739733e+00
   2.5181265e+01  -2.4731592e+01   3.0000000e+02  -2.7729987e+00   1.3804735e+00  -3.6209106e+00
   2.5160787e+01  -2.4604858e+01   3.0000000e+02  -2.5547096e+00   1.1805449e+00  -3.8580820e+00
   2.5133098e+01  -2.4479266e+01   3.0000000e+02  -2.3220112e+00   9.6159231e-01  -4.0813478e+00
   2.5098292e+01  -2.4355155e+01   3.0000000e+02  -2.0760684e+00   7.2280735e-01  -4.2863968e+00
   2.5056485e+01  -2.4232861e+01   3.0000000e+02  -1.8184865e+00   4.6399118e-01  -4.4688160e+00
   2.5007809e+01  -2.4112712e+01   3.0000000e+02  -1.5513420e+00   1.8560785e-01  -4.6242495e+00
   2.4952412e+01  -2.3995031e+01   3.0000000e+02  -1.2771962e+00  -1.1119371e-01  -4.7485826e+00
   2.4890461e+01  -2.3880133e+01   3.0000000e+02  -9.9904966e-01  -4.2461317e-01  -4.8381478e+00
   2.4822137e+01  -2.3768323e+01   3.0000000e+02  -7.2023077e-01  -7.5228433e-01  -4.8899247e+00
   2.4747639e+01  -2.3659901e+01   3.0000000e+02  -4.4426511e-01  -1.0913698e+00  -4.9016888e+00
   2.4667178e+01  -2.3555153e+01   3.0000000e+02  -1.7468493e-01  -1.4387207e+00  -4.8721059e+00
   2.4580981e+01  -2.3454357e+01   3.0000000e+02   8.5122780e-02  -1.7910013e+00  -4.8007529e+00
   2.4489288e+01  -2.3357781e+01   3.0000000e+02   3.3207391e-01  -2.1448389e+00  -4.6880815e+00
   2.4392353e+01  -2.3265678e+01   3.0000000e+02   5.6350877e-01  -2.4969633e+00  -4.5353250e+00
   2.4290440e+01  -2.3178292e+01   3.0000000e+02   7.7728241e-01  -2.8443150e+00  -4.3443807e+00
   2.4183827e+01  -2.3095853e+01   3.0000000e+02   9.7182302e-01  -3.1841388e+00  -4.1176656e+00
   2.4072800e+01  -2.3018576e+01   3.0000000e+02   1.1461822e+00  -3.5140573e+00  -3.8579573e+00
   2.3957657e+01  -2.2946665e+01   3.0000000e+02   1.3000531e+00  -3.8320854e+00  -3.5682514e+00
   2.3838706e+01  -2.2880307e+01   3.0000000e+02   1.4337867e+00  -4.1366359e+00  -3.2516040e+00
   2.3716262e+01  -2.2819677e+01   3.0000000e+02   1.5483900e+00  -4.4264728e+00  -2.9110034e+00
   2.3590649e+01  -2.2764933e+01   3.0000000e+02   1.6454949e+00  -4.7006368e+00  -2.5492585e+00
   2.3462196e+01  -2.2716217e+01   3.0000000e+02   1.7273085e+00  -4.9583478e+00  -2.1689218e+00
   2.3331240e+01  -2.2673656e+01   3.0000000e+02   1.7965279e+00  -5.1988846e+00  -1.7722727e+00
   2.3198125e+01  -2.2637362e+01   3.0000000e+02   1.8562352e+00  -5.4214763e+00  -1.3613390e+00
   2.3063198e+01  -2.2607429e+01   3.0000000e+02   1.9097697e+00  -5.6252162e+00  -9.3795266e-01
   2.2926808e+01  -2.2583934e+01   3.0000000e+02   1.9605907e+00  -5.8089963e+00  -5.0385899e-01
   2.2789312e+01  -2.2566939e+01   3.0000000e+02   2.0121391e+00  -5.9714697e+00  -6.0879915e-02
   2.2651066e+01  -2.2556488e+01   3.0000000e+02   2.0677113e+00  -6.1110778e+00   3.8895588e-01
   2.2512428e+01  -2.2552608e+01   3.0000000e+02   2.1303465e+00  -6.2261039e+00   8.4323735e-01
   2.2373758e+01  -2.2555309e+01   3.0000000e+02   2.2027358e+00  -6.3147770e+00   1.2990154e+00
   2.2235415e+01  -2.2564584e+01   3.0000000e+02   2.2871526e+00  -6.3754206e+00   1.7526849e+00
   2.2097758e+01  -2.2580409e+01   3.0000000e+02   2.3853987e+00  -6.4066336e+00   2.1999003e+00
   2.1961144e+01  -2.2602743e+01   3.0000000e+02   2.4987634e+00  -6.4074943e+00   2.6355660e+00
   2.1825929e+01  -2.2631528e+01   3.0000000e+02   2.6279888e+00  -6.3777642e+00   3.0538955e+00
   2.1692463e+01  -2.2666689e+01   3.0000000e+02   2.7732422e+00  -6.3180642e+00   3.4485773e+00
   2.1561096e+01  -2.2708134e+01   3.0000000e+02   2.9340855e+00  -6.2299987e+00   3.8129825e+00
   2.1432169e+01  -2.2755756e+01   3.0000000e+02   3.1094622e+00  -6.1161938e+00   4.1404837e+00
   2.1306022e+01  -2.2809431e+01   3.0000000e+02   3.2976763e+00  -5.9802546e+00   4.4247565e+00
   2.1182986e+01  -2.2869017e+01   3.0000000e+02   3.4963957e+00  -5.8266176e+00   4.6601373e+00
   2.1063386e+01  -2.2934361e+01   3.0000000e+02   3.7026950e+00  -5.6603312e+00   4.8418888e+00
   2.0947538e+01  -2.3005290e+01   3.0000000e+02   3.9130843e+00  -5.4867833e+00   4.9664686e+00
   2.0835752e+01  -2.3081620e+01   3.0000000e+02   4.1236139e+00  -5.3114094e+00   5.0316558e+00
   2.0728326e+01  -2.3163150e+01   3.0000000e+02   4.3299708e+00  -5.1394020e+00   5.0366649e+00
   2.0625550e+01  -2.3249666e+01   3.0000000e+02   4.5276267e+00  -4.9754661e+00   4.9821232e+00
   2.0527703e+01  -2.3340941e+01   3.0000000e+02   4.7119969e+00  -4.8236162e+00   4.8700066e+00
   2.0435052e+01  -2.3436734e+01   3.0000000e+02   4.8786096e+00  -4.6870367e+00   4.7035136e+00
   2.0347853e+01  -2.3536793e+01   3.0000000e+02   5.0232827e+00  -4.5680070e+00   4.4868663e+00
   2.0266347e+01  -2.3640853e+01   3.0000000e+02   5.1422762e+00  -4.4678793e+00   4.2251031e+00
   2.0190764e+01  -2.3748638e+01   3.0000000e+02   5.2324229e+00  -4.3871212e+00   3.9238127e+00
   2.0121319e+01  -2.3859862e+01   3.0000000e+02   5.2912142e+00  -4.3253928e+00   3.5888809e+00
   2.0058212e+01  -2.3974230e+01   3.0000000e+02   5.3168364e+00  -4.2816637e+00   3.2262429e+00
   2.0001628e+01  -2.4091435e+01   3.0000000e+02   5.3081573e+00  -4.2543511e+00   2.8416867e+00
   1.9951736e+01  -2.4211165e+01   3.0000000e+02   5.2646782e+00  -4.2414689e+00   2.4406655e+00
   1.9908688e+01  -2.4333099e+01   3.0000000e+02   5.1864573e+00  -4.2407700e+00   2.0282206e+00
   1.9658258e+01  -2.4964135e+01   3.0000000e+02   4.2777733e+00  -4.2028866e+00   3.3059479e-01
   1.9658331e+01  -2.5092538e+01   3.0000000e+02   4.0239815e+00  -4.2377123e+00  -6.2222361e-02
   1.9665471e+01  -2.5220779e+01   3.0000000e+02   3.7474520e+00  -4.2698619e+00  -4.4298421e-01
   1.9679684e+01  -2.5348537e+01   3.0000000e+02   3.4510808e+00  -4.2977541e+00  -8.1001458e-01
   1.9700956e+01  -2.5475495e+01   3.0000000e+02   3.1379888e+00  -4.3198723e+00  -1.1621095e+00
   1.9729257e+01  -2.5601333e+01   3.0000000e+02   2.8114261e+00  -4.3347170e+00  -1.4985693e+00
   1.9764537e+01  -2.5725737e+01   3.0000000e+02   2.4746125e+00  -4.3407483e+00  -1.8192043e+00
   1.9806729e+01  -2.5848391e+01   3.0000000e+02   2.1306161e+00  -4.3363396e+00  -2.1242709e+00
   1.9855750e+01  -2.5968986e+01   3.0000000e+02   1.7822043e+00  -4.3197430e+00  -2.4143756e+00
   1.9911494e+01  -2.6087216e+01   3.0000000e+02   1.4317719e+00  -4.2890808e+00  -2.6902827e+00
   1.9973842e+01  -2.6202779e+01   3.0000000e+02   1.0813075e+00  -4.2423759e+00  -2.9527535e+00
   2.0042654e+01  -2.6315381e+01   3.0000000e+02   7.3241919e-01  -4.1776114e+00  -3.2023327e+00
   2.0117773e+01  -2.6424733e+01   3.0000000e+02   3.8643136e-01  -4.0928281e+00  -3.4391953e+00
   2.0199024e+01  -2.6530553e+01   3.0000000e+02   4.4507316e-02  -3.9862372e+00  -3.6630413e+00
   2.0286214e+01  -2.6632570e+01   3.0000000e+02  -2.9222289e-01  -3.8563332e+00  -3.8730615e+00
   2.0379135e+01  -2.6730519e+01   3.0000000e+02  -6.2253019e-01  -3.7019930e+00  -4.0679852e+00
   2.0477561e+01  -2.6824146e+01   3.0000000e+02  -9.4501954e-01  -3.5225394e+00  -4.2461646e+00
   2.0581251e+01  -2.6913208e+01   3.0000000e+02  -1.2581103e+00  -3.3177652e+00  -4.4057050e+00
   2.0689946e+01  -2.6997472e+01   3.0000000e+02  -1.5600683e+00  -3.0879280e+00  -4.5445828e+00
   2.0803374e+01  -2.7076718e+01   3.0000000e+02  -1.8491039e+00  -2.8337101e+00  -4.6607547e+00
   2.0921248e+01  -2.7150738e+01   3.0000000e+02  -2.1234839e+00  -2.5561848e+00  -4.7522197e+00
   2.1043269e+01  -2.7219339e+01   3.0000000e+02  -2.3816658e+00  -2.2567850e+00  -4.8170531e+00
   2.1169124e+01  -2.7282339e+01   3.0000000e+02  -2.6224004e+00  -1.9373109e+00  -4.8534256e+00
   2.1298486e+01  -2.7339571e+01   3.0000000e+02  -2.8448279e+00  -1.5999567e+00  -4.8596183e+00
   2.1431022e+01  -2.7390886e+01   3.0000000e+02  -3.0485429e+00  -1.2473374e+00  -4.8340660e+00
   2.1566384e+01  -2.7436147e+01   3.0000000e+02  -3.2335915e+00  -8.8256850e-01  -4.7754400e+00
   2.1704218e+01  -2.7475234e+01   3.0000000e+02  -3.4004711e+00  -5.0928139e-01  -4.6827658e+00
   2.1844161e+01  -2.7508043e+01   3.0000000e+02  -3.5500756e+00  -1.3164019e-01  -4.5555777e+00
   2.1985845e+01  -2.7534487e+01   3.0000000e+02  -3.6836229e+00   2.4570702e-01  -4.3940927e+00
   2.2128894e+01  -2.7554495e+01   3.0000000e+02  -3.8025527e+00   6.1771724e-01  -4.1993909e+00
   2.2272929e+01  -2.7568015e+01   3.0000000e+02  -3.9084185e+00   9.7912981e-01  -3.9735558e+00
   2.2417568e+01  -2.7575011e+01   3.0000000e+02  -4.0027654e+00   1.3246875e+00  -3.7197751e+00
   2.2562425e+01  -2.7575463e+01   3.0000000e+02  -4.0870175e+00   1.6494042e+00  -3.4423548e+00
   2.2707117e+01  -2.7569371e+01   3.0000000e+02  -4.1623927e+00   1.9488699e+00  -3.1466027e+00
   2.2851258e+01  -2.7556750e+01   3.0000000e+02  -4.2298337e+00   2.2195000e+00  -2.8386523e+00
   2.2994466e+01  -2.7537635e+01   3.0000000e+02  -4.2899902e+00   2.4587583e+00  -2.5251385e+00
   2.3136361e+01  -2.7512076e+01   3.0000000e+02  -4.3432311e+00   2.6652603e+00  -2.2128606e+00
   2.3276567e+01  -2.7480142e+01   3.0000000e+02  -4.3896953e+00   2.8387790e+00  -1.9083973e+00
   2.3414714e+01  -2.7441917e+01   3.0000000e+02  -4.4293664e+00   2.9801377e+00  -1.6177814e+00
   2.3550439e+01  -2.7397502e+01   3.0000000e+02  -4.4621578e+00   3.0910189e+00  -1.3462386e+00
   2.3683386e+01  -2.7347016e+01   3.0000000e+02  -4.4879953e+00   3.1737222e+00  -1.0980340e+00
   2.3813207e+01  -2.7290592e+01   3.0000000e+02  -4.5068841e+00   3.2309125e+00  -8.7644056e-01
   2.3939565e+01  -2.7228379e+01   3.0000000e+02  -4.5189533e+00   3.2653950e+00  -6.8377451e-01
   2.4062135e+01  -2.7160542e+01   3.0000000e+02  -4.5244706e+00   3.2799332e+00  -5.2150970e-01
   2.4180600e+01  -2.7087259e+01   3.0000000e+02  -4.5238287e+00   3.2771247e+00  -3.9045336e-01
   2.4294660e+01  -2.7008723e+01   3.0000000e+02  -4.5175097e+00   3.2593338e+00  -2.9087046e-01
   2.4404026e+01  -2.6925139e+01   3.0000000e+02  -4.5060294e+00   3.2286644e+00  -2.2265531e-01
   2.4508422e+01  -2.6836727e+01   3.0000000e+02  -4.4898718e+00   3.1869663e+00  -1.8542846e-01
   2.4607590e+01  -2.6743716e+01   3.0000000e+02  -4.4694203e+00   3.1358517e+00  -1.7861831e-01
   2.4701285e+01  -2.6646349e+01   3.0000000e+02  -4.4448924e+00   3.0767209e+00  -2.0150370e-01
   2.4789280e+01  -2.6544879e+01   3.0000000e+02  -4.4162851e+00   3.0107809e+00  -2.5322532e-01
   2.4871364e+01  -2.6439568e+01   3.0000000e+02  -4.3833354e+00   2.9390593e+00  -3.3278550e-01
   2.4947340e+01  -2.6330687e+01   3.0000000e+02  -4.3455033e+00   2.8624126e+00  -4.3902916e-01
   2.5017033e+01  -2.6218517e+01   3.0000000e+02  -4.3019841e+00   2.7815192e+00  -5.7058792e-01
   2.5080283e+01  -2.6103346e+01   3.0000000e+02  -4.2517431e+00   2.6968733e+00  -7.2587899e-01
   2.5136947e+01  -2.5985467e+01   3.0000000e+02  -4.1935765e+00   2.6087647e+00  -9.0308459e-01
   2.5186903e+01  -2.5865180e+01   3.0000000e+02  -4.1261957e+00   2.5172527e+00  -1.1001320e+00
   2.5230044e+01  -2.5742792e+01   3.0000000e+02  -4.0483141e+00   2.4221409e+00  -1.3147240e+00
   2.5266284e+01  -2.5618612e+01   3.0000000e+02  -3.9587322e+00   2.3229436e+00  -1.5443694e+00
   2.5295552e+01  -2.5492953e+01   3.0000000e+02  -3.8564057e+00   2.2188690e+00  -1.7864371e+00
   2.5317797e+01  -2.5366131e+01   3.0000000e+02  -3.7404940e+00   2.1088108e+00  -2.0381926e+00
   2.5332986e+01  -2.5238464e+01   3.0000000e+02  -3.6103772e+00   1.9913631e+00  -2.2968433e+00
   2.5341104e+01  -2.5110271e+01   3.0000000e+02  -3.4656491e+00   1.8648614e+00  -2.5595562e+00
   2.5342152e+01  -2.4981871e+01   3.0000000e+02  -3.3060908e+00   1.7274512e+00  -2.8234526e+00
   2.5336150e+01  -2.4853584e+01   3.0000000e+02  -3.1316507e+00   1.5771856e+00  -3.0855567e+00
   2.5323136e+01  -2.4725725e+01   3.0000000e+02  -2.9424246e+00   1.4121383e+00  -3.3427464e+00
   2.5303161e+01  -2.4598612e+01   3.0000000e+02  -2.7386771e+00   1.2305475e+00  -3.5916795e+00
   2.5276298e+01  -2.4472555e+01   3.0000000e+02  -2.5208876e+00   1.0309425e+00  -3.8287462e+00
   2.5242631e+01  -2.4347866e+01   3.0000000e+02  -2.2898293e+00   8.1228590e-01  -4.0500682e+00
   2.5202263e+01  -2.4224848e+01   3.0000000e+02  -2.0466554e+00   5.7407018e-01  -4.2515558e+00
   2.5155311e+01  -2.4103801e+01   3.0000000e+02  -1.7929795e+00   3.1640141e-01  -4.4290304e+00
   2.5101907e+01  -2.3985020e+01   3.0000000e+02  -1.5309168e+00   4.0032494e-02  -4.5784031e+00
   2.5042198e+01  -2.3868793e+01   3.0000000e+02  -1.2630684e+00  -2.5364908e-01  -4.6958865e+00
   2.4976345e+01  -2.3755401e+01   3.0000000e+02  -9.9244748e-01  -5.6267382e-01  -4.7782026e+00
   2.4904522e+01  -2.3645119e+01   3.0000000e+02  -7.2235430e-01  -8.8457671e-01  -4.8227598e+00
   2.4826917e+01  -2.3538210e+01   3.0000000e+02  -4.5621463e-01  -1.2165209e+00  -4.8277717e+00
   2.4743728e+01  -2.3434933e+01   3.0000000e+02  -1.9741811e-01  -1.5554151e+00  -4.7923147e+00
   2.4655167e+01  -2.3335535e+01   3.0000000e+02   5.0834863e-02  -1.8980558e+00  -4.7163172e+00
   2.4561458e+01  -2.3240254e+01   3.0000000e+02   2.8565775e-01  -2.2412526e+00  -4.6005040e+00
   2.4462834e+01  -2.3149316e+01   3.0000000e+02   5.0457928e-01  -2.5819570e+00  -4.4462970e+00
   2.4359540e+01  -2.3062940e+01   3.0000000e+02   7.0560230e-01  -2.9173522e+00  -4.2557033e+00
   2.4251828e+01  -2.2981331e+01   3.0000000e+02   8.8726398e-01  -3.2449573e+00  -4.0311718e+00
   2.4139963e+01  -2.2904682e+01   3.0000000e+02   1.0486597e+00  -3.5626700e+00  -3.7754581e+00
   2.4024215e+01  -2.2833175e+01   3.0000000e+02   1.1894824e+00  -3.8688053e+00  -3.4914733e+00
   2.3904864e+01  -2.2766980e+01   3.0000000e+02   1.3100337e+00  -4.1620771e+00  -3.1821446e+00
   2.3782195e+01  -2.2706254e+01   3.0000000e+02   1.4112341e+00  -4.4415602e+00  -2.8502733e+00
   2.3656504e+01  -2.2651139e+01   3.0000000e+02   1.4945980e+00  -4.7065973e+00  -2.4984327e+00
   2.3528089e+01  -2.2601767e+01   3.0000000e+02   1.5622047e+00  -4.9566980e+00  -2.1288835e+00
   2.3397254e+01  -2.2558253e+01   3.0000000e+02   1.6166178e+00  -5.1914131e+00  -1.7435396e+00
   2.3264310e+01  -2.2520700e+01   3.0000000e+02   1.6607922e+00  -5.4102057e+00  -1.3440003e+00
   2.3129570e+01  -2.2489197e+01   3.0000000e+02   1.6979602e+00  -5.6123541e+00  -9.3160640e-01
   2.2993353e+01  -2.2463818e+01   3.0000000e+02   1.7314987e+00  -5.7968705e+00  -5.0756209e-01
   2.2855977e+01  -2.2444622e+01   3.0000000e+02   1.7648045e+00  -5.9624722e+00  -7.3062460e-02
   2.2717767e+01  -2.2431654e+01   3.0000000e+02   1.8011695e+00  -6.1075759e+00   3.7051687e-01
   2.2579046e+01  -2.2424946e+01   3.0000000e+02   1.8436831e+00  -6.2303575e+00   8.2147332e-01
   2.2440140e+01  -2.2424512e+01   3.0000000e+02   1.8951334e+00  -6.3288421e+00   1.2776059e+00
   2.2301374e+01  -2.2430354e+01   3.0000000e+02   1.9579548e+00  -6.4010396e+00   1.7360782e+00
   2.2163073e+01  -2.2442458e+01   3.0000000e+02   2.0341724e+00  -6.4451167e+00   2.1933168e+00
   2.2025563e+01  -2.2460796e+01   3.0000000e+02   2.1253719e+00  -6.4595942e+00   2.6449559e+00
   2.1889167e+01  -2.2485325e+01   3.0000000e+02   2.2326737e+00  -6.4435563e+00   3.0858706e+00
   2.1754204e+01  -2.2515986e+01   3.0000000e+02   2.3567074e+00  -6.3968453e+00   3.5102780e+00
   2.1620993e+01  -2.2552708e+01   3.0000000e+02   2.4975991e+00  -6.3202192e+00   3.9118913e+00
   2.1489849e+01  -2.2595404e+01   3.0000000e+02   2.6549392e+00  -6.2154484e+00   4.2841816e+00
   2.1361081e+01  -2.2643974e+01   3.0000000e+02   2.8277695e+00  -6.0853269e+00   4.6206695e+00
   2.1234995e+01  -2.2698303e+01   3.0000000e+02   3.0145616e+00  -5.9335993e+00   4.9152267e+00
   2.1111892e+01  -2.2758262e+01   3.0000000e+02   3.2132157e+00  -5.7648001e+00   5.1623792e+00
   2.0992065e+01  -2.2823711e+01   3.0000000e+02   3.4210840e+00  -5.5840224e+00   5.3575673e+00
   2.0875802e+01  -2.2894493e+01   3.0000000e+02   3.6349878e+00  -5.3966553e+00   5.4973494e+00
   2.0763384e+01  -2.2970442e+01   3.0000000e+02   3.8513020e+00  -5.2081010e+00   5.5795186e+00
   2.0655083e+01  -2.3051378e+01   3.0000000e+02   4.0660273e+00  -5.0235083e+00   5.6031791e+00
   2.0551163e+01  -2.3137108e+01   3.0000000e+02   4.2749064e+00  -4.8475457e+00   5.5687354e+00
   2.0451879e+01  -2.3227427e+01   3.0000000e+02   4.4735607e+00  -4.6842204e+00   5.4778295e+00
   2.0357477e+01  -2.3322122e+01   3.0000000e+02   4.6576489e+00  -4.5367546e+00   5.3332143e+00
   2.0268192e+01  -2.3420965e+01   3.0000000e+02   4.8230073e+00  -4.4075113e+00   5.1386308e+00
   2.0184248e+01  -2.3523721e+01   3.0000000e+02   4.9658163e+00  -4.2979785e+00   4.8985918e+00
   2.0105859e+01  -2.3630143e+01   3.0000000e+02   5.0827219e+00  -4.2087978e+00   4.6181879e+00
   2.0033225e+01  -2.3739975e+01   3.0000000e+02   5.1709392e+00  -4.1398275e+00   4.3028608e+00
   1.9966537e+01  -2.3852954e+01   3.0000000e+02   5.2283126e+00  -4.0902517e+00   3.9581624e+00
   1.9905970e+01  -2.3968805e+01   3.0000000e+02   5.2533206e+00  -4.0586876e+00   3.5895909e+00
   1.9851686e+01  -2.4087250e+01   3.0000000e+02   5.2450536e+00  -4.0433285e+00   3.2023836e+00
   1.9803834e+01  -2.4208001e+01   3.0000000e+02   5.2031491e+00  -4.0420725e+00   2.8014352e+00
   1.9762549e+01  -2.4330765e+01   3.0000000e+02   5.1277194e+00  -4.0526469e+00   2.3912218e+00
   1.9727950e+01  -2.4455242e+01   3.0000000e+02   5.0192808e+00  -4.0727105e+00   1.9758084e+00
   1.9700141e+01  -2.4581127e+01   3.0000000e+02   4.8787037e+00  -4.0999419e+00   1.5588686e+00
   1.9679211e+01  -2.4708114e+01   3.0000000e+02   4.7071834e+00  -4.1321033e+00   1.1437159e+00
   1.9665231e+01  -2.4835888e+01   3.0000000e+02   4.5062498e+00  -4.1670752e+00   7.3338346e-01
   1.9561507e+01  -2.5500819e+01   3.0000000e+02   3.0749723e+00  -4.2081537e+00  -8.1108796e-01
   1.9589726e+01  -2.5626946e+01   3.0000000e+02   2.7554580e+00  -4.2339705e+00  -1.1367731e+00
   1.9624627e+01  -2.5751714e+01   3.0000000e+02   2.4262262e+00  -4.2517379e+00  -1.4466355e+00
   1.9666153e+01  -2.5874835e+01   3.0000000e+02   2.0902981e+00  -4.2600457e+00  -1.7410603e+00
   1.9714228e+01  -2.5996026e+01   3.0000000e+02   1.7503943e+00  -4.2573707e+00  -2.0208159e+00
   1.9768761e+01  -2.6115005e+01   3.0000000e+02   1.4088472e+00  -4.2420598e+00  -2.2869072e+00
   1.9829646e+01  -2.6231497e+01   3.0000000e+02   1.0675403e+00  -4.2123371e+00  -2.5403932e+00
   1.9896760e+01  -2.6345231e+01   3.0000000e+02   7.2793749e-01  -4.1663462e+00  -2.7821778e+00
   1.9969966e+01  -2.6455941e+01   3.0000000e+02   3.9116005e-01  -4.1022262e+00  -3.0128402e+00
   2.0049110e+01  -2.6563367e+01   3.0000000e+02   5.8112781e-02  -4.0182082e+00  -3.2324962e+00
   2.0134023e+01  -2.6667257e+01   3.0000000e+02  -2.7037196e-01  -3.9127222e+00  -3.4407403e+00
   2.0224521e+01  -2.6767366e+01   3.0000000e+02  -5.9338748e-01  -3.7844960e+00  -3.6366560e+00
   2.0320404e+01  -2.6863457e+01   3.0000000e+02  -9.0984354e-01  -3.6326283e+00  -3.8188871e+00
   2.0421461e+01  -2.6955302e+01   3.0000000e+02  -1.2184147e+00  -3.4566226e+00  -3.9857661e+00
   2.0527463e+01  -2.7042683e+01   3.0000000e+02  -1.5175397e+00  -3.2563914e+00  -4.1354228e+00
   2.0638171e+01  -2.7125392e+01   3.0000000e+02  -1.8054880e+00  -3.0322210e+00  -4.2659160e+00
   2.0753330e+01  -2.7203230e+01   3.0000000e+02  -2.0804555e+00  -2.7847363e+00  -4.3752989e+00
   2.0872674e+01  -2.7276011e+01   3.0000000e+02  -2.3407037e+00  -2.5148560e+00  -4.4616620e+00
   2.0995925e+01  -2.7343561e+01   3.0000000e+02  -2.5846837e+00  -2.2237807e+00  -4.5231364e+00
   2.1122795e+01  -2.7405716e+01   3.0000000e+02  -2.8111456e+00  -1.9130090e+00  -4.5578919e+00
   2.1252984e+01  -2.7462327e+01   3.0000000e+02  -3.0192308e+00  -1.5843855e+00  -4.5641263e+00
   2.1386183e+01  -2.7513257e+01   3.0000000e+02  -3.2085211e+00  -1.2401686e+00  -4.5401063e+00
   2.1522075e+01  -2.7558383e+01   3.0000000e+02  -3.3790617e+00  -8.8310073e-01  -4.4842368e+00
   2.1660335e+01  -2.7597595e+01   3.0000000e+02  -3.5313489e+00  -5.1647180e-01  -4.3951830e+00
   2.1800629e+01  -2.7630798e+01   3.0000000e+02  -3.6662928e+00  -1.4415126e-01  -4.2720279e+00
   2.1942620e+01  -2.7657911e+01   3.0000000e+02  -3.7851556e+00   2.2944143e-01  -4.1144624e+00
   2.2085964e+01  -2.7678868e+01   3.0000000e+02  -3.8894619e+00   5.9940326e-01  -3.9229809e+00
   2.2230314e+01  -2.7693619e+01   3.0000000e+02  -3.9808965e+00   9.6050108e-01  -3.6990576e+00
   2.2375319e+01  -2.7702127e+01   3.0000000e+02  -4.0611855e+00   1.3073781e+00  -3.4452907e+00
   2.2520628e+01  -2.7704372e+01   3.0000000e+02  -4.1319854e+00   1.6348339e+00  -3.1654451e+00
   2.2665886e+01  -2.7700348e+01   3.0000000e+02  -4.1947756e+00   1.9381130e+00  -2.8644248e+00
   2.2810741e+01  -2.7690065e+01   3.0000000e+02  -4.2507824e+00   2.2132179e+00  -2.5480971e+00
   2.2954841e+01  -2.7673548e+01   3.0000000e+02  -4.3009307e+00   2.4571504e+00  -2.2230344e+00
   2.3097836e+01  -2.7650838e+01   3.0000000e+02  -4.3458343e+00   2.6680799e+00  -1.8961600e+00
   2.3239380e+01  -2.7621989e+01   3.0000000e+02  -4.3858237e+00   2.8453976e+00  -1.5743661e+00
   2.3379131e+01  -2.7587071e+01   3.0000000e+02  -4.4210022e+00   2.9896525e+00  -1.2641343e+00
   2.3516752e+01  -2.7546171e+01   3.0000000e+02  -4.4513215e+00   3.1023873e+00  -9.7122179e-01
   2.3651913e+01  -2.7499386e+01   3.0000000e+02  -4.4766659e+00   3.1859024e+00  -7.0046505e-01
   2.3784289e+01  -2.7446830e+01   3.0000000e+02  -4.4969285e+00   3.2429909e+00  -4.5566461e-01
   2.3913567e+01  -2.7388631e+01   3.0000000e+02  -4.5120725e+00   3.2766851e+00  -2.3957763e-01
   2.4039440e+01  -2.7324929e+01   3.0000000e+02  -4.5221694e+00   3.2900347e+00  -5.4032834e-02
   2.4161611e+01  -2.7255877e+01   3.0000000e+02  -4.5274106e+00   3.2859474e+00   9.9941489e-02
   2.4279795e+01  -2.7181642e+01   3.0000000e+02  -4.5280952e+00   3.2670860e+00   2.2196037e-01
   2.4393717e+01  -2.7102402e+01   3.0000000e+02  -4.5245965e+00   3.2358187e+00   3.1210337e-01
   2.4503114e+01  -2.7018346e+01   3.0000000e+02  -4.5173146e+00   3.1942102e+00   3.7078052e-01
   2.4607736e+01  -2.6929676e+01   3.0000000e+02  -4.5066195e+00   3.1440364e+00   3.9863345e-01
   2.4707347e+01  -2.6836603e+01   3.0000000e+02  -4.4927914e+00   3.0868104e+00   3.9645205e-01
   2.4801723e+01  -2.6739348e+01   3.0000000e+02  -4.4759643e+00   3.0238124e+00   3.6513054e-01
   2.4890655e+01  -2.6638142e+01   3.0000000e+02  -4.4560760e+00   2.9561134e+00   3.0566170e-01
   2.4973949e+01  -2.6533223e+01   3.0000000e+02  -4.4328314e+00   2.8845946e+00   2.1913403e-01
   2.5051423e+01  -2.6424839e+01   3.0000000e+02  -4.4056839e+00   2.8099647e+00   1.0675405e-01
   2.5122915e+01  -2.6313244e+01   3.0000000e+02  -4.3738402e+00   2.7327626e+00  -3.0115206e-02
   2.5188275e+01  -2.6198700e+01   3.0000000e+02  -4.3362899e+00   2.6533678e+00  -1.8993947e-01
   2.5247369e+01  -2.6081474e+01   3.0000000e+02  -4.2918601e+00   2.5719927e+00  -3.7098834e-01
   2.5300079e+01  -2.5961839e+01   3.0000000e+02  -4.2392913e+00   2.4886717e+00  -5.7132418e-01
   2.5346303e+01  -2.5840072e+01   3.0000000e+02  -4.1773221e+00   2.4032415e+00  -7.8881887e-01
   2.5385955e+01  -2.5716454e+01   3.0000000e+02  -4.1047736e+00   2.3153173e+00  -1.0211852e+00
   2.5418965e+01  -2.5591271e+01   3.0000000e+02  -4.0206213e+00   2.2242687e+00  -1.2660220e+00
   2.5445279e+01  -2.5464810e+01   3.0000000e+02  -3.9240392e+00   2.1291995e+00  -1.5208792e+00
   2.5464856e+01  -2.5337360e+01   3.0000000e+02  -3.8144157e+00   2.0289424e+00  -1.7833111e+00
   2.5477675e+01  -2.5209213e+01   3.0000000e+02  -3.6913462e+00   1.9220677e+00  -2.0508906e+00
   2.5483728e+01  -2.5080658e+01   3.0000000e+02  -3.5545875e+00   1.8069153e+00  -2.3212406e+00
   2.5483022e+01  -2.4951989e+01   3.0000000e+02  -3.4040209e+00   1.6816572e+00  -2.5919774e+00
   2.5475580e+01  -2.4823495e+01   3.0000000e+02  -3.2396020e+00   1.5443712e+00  -2.8606629e+00
   2.5461440e+01  -2.4695467e+01   3.0000000e+02  -3.0613509e+00   1.3931506e+00  -3.1247003e+00
   2.5440654e+01  -2.4568191e+01   3.0000000e+02  -2.8693630e+00   1.2262159e+00  -3.3812540e+00
   2.5413289e+01  -2.4441952e+01   3.0000000e+02  -2.6638770e+00   1.0420460e+00  -3.6271671e+00
   2.5379424e+01  -2.4317033e+01   3.0000000e+02  -2.4453662e+00   8.3949939e-01  -3.8589437e+00
   2.5339155e+01  -2.4193711e+01   3.0000000e+02  -2.2146517e+00   6.1791687e-01  -4.0727883e+00
   2.5292589e+01  -2.4072260e+01   3.0000000e+02  -1.9729998e+00   3.7720414e-01  -4.2647244e+00
   2.5239846e+01  -2.3952950e+01   3.0000000e+02  -1.7221864e+00   1.1787465e-01  -4.4307675e+00
   2.5181059e+01  -2.3836043e+01   3.0000000e+02  -1.4644982e+00  -1.5895413e-01  -4.5671385e+00
   2.5116373e+01  -2.3721796e+01   3.0000000e+02  -1.2026779e+00  -4.5159306e-01  -4.6704747e+00
   2.5045945e+01  -2.3610462e+01   3.0000000e+02  -9.3981424e-01  -7.5785022e-01  -4.7380152e+00
   2.4969943e+01  -2.3502284e+01   3.0000000e+02  -6.7918394e-01  -1.0751409e+00  -4.7677366e+00
   2.4888547e+01  -2.3397498e+01   3.0000000e+02  -4.2409948e-01  -1.4005937e+00  -4.7584202e+00
   2.4801945e+01  -2.3296334e+01   3.0000000e+02  -1.7775455e-01  -1.7311748e+00  -4.7096647e+00
   2.4710338e+01  -2.3199011e+01   3.0000000e+02   5.6894035e-02  -2.0638111e+00  -4.6218433e+00
   2.4613934e+01  -2.3105742e+01   3.0000000e+02   2.7722436e-01  -2.3955047e+00  -4.4960321e+00
   2.4512952e+01  -2.3016728e+01   3.0000000e+02   4.8101200e-01  -2.7234448e+00  -4.3339093e+00
   2.4407618e+01  -2.2932162e+01   3.0000000e+02   6.6648040e-01  -3.0451005e+00  -4.1376441e+00
   2.4298167e+01  -2.2852228e+01   3.0000000e+02   8.3233603e-01  -3.3582945e+00  -3.9097754e+00
   2.4184843e+01  -2.2777097e+01   3.0000000e+02   9.7780263e-01  -3.6612602e+00  -3.6530745e+00
   2.4067894e+01  -2.2706932e+01   3.0000000e+02   1.1026575e+00  -3.9526614e+00  -3.3704045e+00
   2.3947577e+01  -2.2641884e+01   3.0000000e+02   1.2072487e+00  -4.2315705e+00  -3.0645791e+00
   2.3824154e+01  -2.2582093e+01   3.0000000e+02   1.2925098e+00  -4.4974152e+00  -2.7382236e+00
   2.3697894e+01  -2.2527687e+01   3.0000000e+02   1.3599456e+00  -4.7498796e+00  -2.3936650e+00
   2.3569070e+01  -2.2478782e+01   3.0000000e+02   1.4115969e+00  -4.9887850e+00  -2.0328510e+00
   2.3437960e+01  -2.2435485e+01   3.0000000e+02   1.4499757e+00  -5.2139491e+00  -1.6573293e+00
   2.3304846e+01  -2.2397887e+01   3.0000000e+02   1.4779683e+00  -5.4250577e+00  -1.2682615e+00
   2.3170014e+01  -2.2366070e+01   3.0000000e+02   1.4987307e+00  -5.6215467e+00  -8.6651299e-01
   2.3033751e+01  -2.2340100e+01   3.0000000e+02   1.5155613e+00  -5.8025278e+00  -4.5275841e-01
   2.2896351e+01  -2.2320035e+01   3.0000000e+02   1.5317880e+00  -5.9667375e+00  -2.7664210e-02
   2.2758106e+01  -2.2305916e+01   3.0000000e+02   1.5506455e+00  -6.1125572e+00   4.0797495e-01
   2.2619311e+01  -2.2297773e+01   3.0000000e+02   1.5751843e+00  -6.2380530e+00   8.5303745e-01
   2.2480261e+01  -2.2295625e+01   3.0000000e+02   1.6081945e+00  -6.3410727e+00   1.3059158e+00
   2.2341254e+01  -2.2299476e+01   3.0000000e+02   1.6521379e+00  -6.4193767e+00   1.7643650e+00
   2.2202585e+01  -2.2309317e+01   3.0000000e+02   1.7091132e+00  -6.4708090e+00   2.2254080e+00
   2.2064549e+01  -2.2325128e+01   3.0000000e+02   1.7808340e+00  -6.4934884e+00   2.6852609e+00
   2.1927442e+01  -2.2346874e+01   3.0000000e+02   1.8686020e+00  -6.4860175e+00   3.1393318e+00
   2.1791557e+01  -2.2374510e+01   3.0000000e+02   1.9733075e+00  -6.4476843e+00   3.5822967e+00
   2.1657183e+01  -2.2407975e+01   3.0000000e+02   2.0953996e+00  -6.3786361e+00   4.0082523e+00
   2.1524609e+01  -2.2447199e+01   3.0000000e+02   2.2348869e+00  -6.2800018e+00   4.4109007e+00
   2.1394119e+01  -2.2492098e+01   3.0000000e+02   2.3913053e+00  -6.1539412e+00   4.7838321e+00
   2.1265995e+01  -2.2542575e+01   3.0000000e+02   2.5636988e+00  -6.0036151e+00   5.1208003e+00
   2.1140513e+01  -2.2598522e+01   3.0000000e+02   2.7506103e+00  -5.8330641e+00   5.4160180e+00
   2.1017944e+01  -2.2659819e+01   3.0000000e+02   2.9500708e+00  -5.6470218e+00   5.6644136e+00
   2.0898557e+01  -2.2726334e+01   3.0000000e+02   3.1596063e+00  -5.4506800e+00   5.8618331e+00
   2.0782611e+01  -2.2797925e+01   3.0000000e+02   3.3762703e+00  -5.2494137e+00   6.0052089e+00
   2.0670361e+01  -2.2874436e+01   3.0000000e+02   3.5966792e+00  -5.0485293e+00   6.0926382e+00
   2.0562055e+01  -2.2955703e+01   3.0000000e+02   3.8171001e+00  -4.8530224e+00   6.1234039e+00
   2.0457932e+01  -2.3041550e+01   3.0000000e+02   4.0335334e+00  -4.6673778e+00   6.0979645e+00
   2.0358227e+01  -2.3131792e+01   3.0000000e+02   4.2418354e+00  -4.4954289e+00   6.0178684e+00
   2.0263163e+01  -2.3226233e+01   3.0000000e+02   4.4378433e+00  -4.3402433e+00   5.8856764e+00
   2.0172956e+01  -2.3324668e+01   3.0000000e+02   4.6175208e+00  -4.2040799e+00   5.7048134e+00
   2.0087812e+01  -2.3426883e+01   3.0000000e+02   4.7770964e+00  -4.0883753e+00   5.4794182e+00
   2.0007928e+01  -2.3532655e+01   3.0000000e+02   4.9131898e+00  -3.9937752e+00   5.2141636e+00
   1.9933490e+01  -2.3641754e+01   3.0000000e+02   5.0229155e+00  -3.9201950e+00   4.9140615e+00
   1.9864676e+01  -2.3753940e+01   3.0000000e+02   5.1039471e+00  -3.8669128e+00   4.5842761e+00
   1.9801649e+01  -2.3868967e+01   3.0000000e+02   5.1545453e+00  -3.8326669e+00   4.2299402e+00
   1.9744563e+01  -2.3986583e+01   3.0000000e+02   5.1735442e+00  -3.8157850e+00   3.8559898e+00
   1.9693560e+01  -2.4106528e+01   3.0000000e+02   5.1603021e+00  -3.8142961e+00   3.4670663e+00
   1.9648769e+01  -2.4228537e+01   3.0000000e+02   5.1146349e+00  -3.8260432e+00   3.0674418e+00
   1.9610308e+01  -2.4352341e+01   3.0000000e+02   5.0367461e+00  -3.8487843e+00   2.6609961e+00
   1.9578279e+01  -2.4477663e+01   3.0000000e+02   4.9271679e+00  -3.8802634e+00   2.2512686e+00
   1.9552774e+01  -2.4604225e+01   3.0000000e+02   4.7867294e+00  -3.9182858e+00   1.8414654e+00
   1.9533868e+01  -2.4731743e+01   3.0000000e+02   4.6165504e+00  -3.9607488e+00   1.4345482e+00
   1.9521625e+01  -2.4859933e+01   3.0000000e+02   4.4180573e+00  -4.0056830e+00   1.0332357e+00
   1.9516092e+01  -2.4988506e+01   3.0000000e+02   4.1930151e+00  -4.0512568e+00   6.4004602e-01
   1.9517303e+01  -2.5117173e+01   3.0000000e+02   3.9435465e+00  -4.0957865e+00   2.5724405e-01
   1.9525276e+01  -2.5245641e+01   3.0000000e+02   3.6721386e+00  -4.1377223e+00  -1.1319498e-01
   1.9540015e+01  -2.5373620e+01   3.0000000e+02   3.3815960e+00  -4.1756304e+00  -4.6968586e-01
   1.9582278e+01  -2.6044625e+01   3.0000000e+02   1.6572503e+00  -4.1661486e+00  -1.6766503e+00
   1.9636798e+01  -2.6163869e+01   3.0000000e+02   1.3251218e+00  -4.1627048e+00  -1.9299701e+00
   1.9697417e+01  -2.6280740e+01   3.0000000e+02   9.9376402e-01  -4.1460608e+00  -2.1715510e+00
   1.9764025e+01  -2.6394989e+01   3.0000000e+02   6.6443834e-01  -4.1145252e+00  -2.4025608e+00
   1.9836497e+01  -2.6506371e+01   3.0000000e+02   3.3803229e-01  -4.0663688e+00  -2.6238518e+00
   1.9914695e+01  -2.6614647e+01   3.0000000e+02   1.5184027e-02  -3.9999101e+00  -2.8358250e+00
   1.9998467e+01  -2.6719585e+01   3.0000000e+02  -3.0356090e-01  -3.9136118e+00  -3.0383495e+00
   2.0087649e+01  -2.6820956e+01   3.0000000e+02  -6.1758234e-01  -3.8061776e+00  -3.2307665e+00
   2.0182062e+01  -2.6918543e+01   3.0000000e+02  -9.2607427e-01  -3.6766200e+00  -3.4119407e+00
   2.0281515e+01  -2.7012132e+01   3.0000000e+02  -1.2279429e+00  -3.5243089e+00  -3.5803852e+00
   2.0385805e+01  -2.7101520e+01   3.0000000e+02  -1.5218053e+00  -3.3489684e+00  -3.7343880e+00
   2.0494715e+01  -2.7186511e+01   3.0000000e+02  -1.8060178e+00  -3.1506553e+00  -3.8721310e+00
   2.0608019e+01  -2.7266919e+01   3.0000000e+02  -2.0787773e+00  -2.9297052e+00  -3.9917869e+00
   2.0725477e+01  -2.7342569e+01   3.0000000e+02  -2.3382404e+00  -2.6866899e+00  -4.0915479e+00
   2.0846840e+01  -2.7413292e+01   3.0000000e+02  -2.5826505e+00  -2.4223890e+00  -4.1696446e+00
   2.0971849e+01  -2.7478933e+01   3.0000000e+02  -2.8104770e+00  -2.1377867e+00  -4.2243032e+00
   2.1100234e+01  -2.7539347e+01   3.0000000e+02  -3.0205088e+00  -1.8341184e+00  -4.2537188e+00
   2.1231716e+01  -2.7594400e+01   3.0000000e+02  -3.2119324e+00  -1.5129393e+00  -4.2560459e+00
   2.1366011e+01  -2.7643970e+01   3.0000000e+02  -3.3843805e+00  -1.1762060e+00  -4.2294264e+00
   2.1502822e+01  -2.7687946e+01   3.0000000e+02  -3.5379399e+00  -8.2638769e-01  -4.1720605e+00
   2.1641851e+01  -2.7726231e+01   3.0000000e+02  -3.6731556e+00  -4.6651478e-01  -4.0823339e+00
   2.1782789e+01  -2.7758739e+01   3.0000000e+02  -3.7909856e+00  -1.0024834e-01  -3.9589894e+00
   2.1925324e+01  -2.7785398e+01   3.0000000e+02  -3.8927545e+00   2.6814389e-01  -3.8013231e+00
   2.2069141e+01  -2.7806148e+01   3.0000000e+02  -3.9800718e+00   6.3385015e-01  -3.6094003e+00
   2.2213918e+01  -2.7820943e+01   3.0000000e+02  -4.0547353e+00   9.9163960e-01  -3.3842585e+00
   2.2359334e+01  -2.7829750e+01   3.0000000e+02  -4.1186225e+00   1.3360872e+00  -3.1280651e+00
   2.2505064e+01  -2.7832548e+01   3.0000000e+02  -4.1735732e+00   1.6618312e+00  -2.8442170e+00
   2.2650783e+01  -2.7829332e+01   3.0000000e+02  -4.2212851e+00   1.9638954e+00  -2.5373143e+00
   2.2796165e+01  -2.7820109e+01   3.0000000e+02  -4.2632209e+00   2.2380027e+00  -2.2130435e+00
   2.2940886e+01  -2.7804899e+01   3.0000000e+02  -4.3005489e+00   2.4808596e+00  -1.8779217e+00
   2.3084624e+01  -2.7783737e+01   3.0000000e+02  -4.3341146e+00   2.6903543e+00  -1.5389479e+00
   2.3227059e+01  -2.7756669e+01   3.0000000e+02  -4.3644490e+00   2.8656420e+00  -1.2032206e+00
   2.3367874e+01  -2.7723757e+01   3.0000000e+02  -4.3918078e+00   3.0071131e+00  -8.7752559e-01
   2.3506758e+01  -2.7685074e+01   3.0000000e+02  -4.4162366e+00   3.1162479e+00  -5.6799827e-01
   2.3643404e+01  -2.7640706e+01   3.0000000e+02  -4.4376476e+00   3.1953851e+00  -2.7987048e-01
   2.3777513e+01  -2.7590751e+01   3.0000000e+02  -4.4558986e+00   3.2474524e+00  -1.7320419e-02
   2.3908790e+01  -2.7535322e+01   3.0000000e+02  -4.4708608e+00   3.2756885e+00   2.1655359e-01
   2.4036949e+01  -2.7474540e+01   3.0000000e+02  -4.4824728e+00   3.2834027e+00   4.1966095e-01
   2.4161713e+01  -2.7408541e+01   3.0000000e+02  -4.4907669e+00   3.2737832e+00   5.9080836e-01
   2.4282813e+01  -2.7337470e+01   3.0000000e+02  -4.4958768e+00   3.2497691e+00   7.2951036e-01
   2.4399990e+01  -2.7261485e+01   3.0000000e+02  -4.4980208e+00   3.2139803e+00   8.3583491e-01
   2.4512996e+01  -2.7180752e+01   3.0000000e+02  -4.4974715e+00   3.1686945e+00   9.1023303e-01
   2.4621593e+01  -2.7095449e+01   3.0000000e+02  -4.4945118e+00   3.1158556e+00   9.5341996e-01
   2.4725553e+01  -2.7005763e+01   3.0000000e+02  -4.4893874e+00   3.0571014e+00   9.6627126e-01
   2.4824663e+01  -2.6911889e+01   3.0000000e+02  -4.4822548e+00   2.9937914e+00   9.4977151e-01
   2.4918718e+01  -2.6814033e+01   3.0000000e+02  -4.4731335e+00   2.9270412e+00   9.0496998e-01
   2.5007530e+01  -2.6712406e+01   3.0000000e+02  -4.4618623e+00   2.8577431e+00   8.3297571e-01
   2.5090920e+01  -2.6607230e+01   3.0000000e+02  -4.4480663e+00   2.7865942e+00   7.3496107e-01
   2.5168725e+01  -2.6498730e+01   3.0000000e+02  -4.4311385e+00   2.7141106e+00   6.1217693e-01
   2.5240794e+01  -2.6387141e+01   3.0000000e+02  -4.4102423e+00   2.6406486e+00   4.6599232e-01
   2.5306989e+01  -2.6272702e+01   3.0000000e+02  -4.3843386e+00   2.5664188e+00   2.9791157e-01
   2.5367188e+01  -2.6155658e+01   3.0000000e+02  -4.3522375e+00   2.4914917e+00   1.0961354e-01
   2.5421281e+01  -2.6036259e+01   3.0000000e+02  -4.3126721e+00   2.4158024e+00  -9.7047845e-02
   2.5469171e+01  -2.5914758e+01   3.0000000e+02  -4.2643827e+00   2.3391413e+00  -3.2005375e-01
   2.5510778e+01  -2.5791412e+01   3.0000000e+02  -4.2062041e+00   2.2611334e+00  -5.5723912e-01
   2.5546034e+01  -2.5666483e+01   3.0000000e+02  -4.1371382e+00   2.1812216e+00  -8.0635123e-01
   2.5574885e+01  -2.5540232e+01   3.0000000e+02  -4.0563992e+00   2.0986396e+00  -1.0651226e+00
   2.5597291e+01  -2.5412926e+01   3.0000000e+02  -3.9634349e+00   2.0123977e+00  -1.3313143e+00
   2.5613226e+01  -2.5284830e+01   3.0000000e+02  -3.8579045e+00   1.9212718e+00  -1.6027833e+00
   2.5622677e+01  -2.5156210e+01   3.0000000e+02  -3.7396348e+00   1.8238137e+00  -1.8774954e+00
   2.5625646e+01  -2.5027335e+01   3.0000000e+02  -3.6085608e+00   1.7183796e+00  -2.1534983e+00
   2.5622147e+01  -2.4898470e+01   3.0000000e+02  -3.4646529e+00   1.6031756e+00  -2.4288843e+00
   2.5612207e+01  -2.4769883e+01   3.0000000e+02  -3.3078768e+00   1.4763336e+00  -2.7016765e+00
   2.5595867e+01  -2.4641837e+01   3.0000000e+02  -3.1381733e+00   1.3359960e+00  -2.9697278e+00
   2.5573179e+01  -2.4514596e+01   3.0000000e+02  -2.9554955e+00   1.1804287e+00  -3.2305988e+00
   2.5544210e+01  -2.4388419e+01   3.0000000e+02  -2.7598865e+00   1.0081315e+00  -3.4814780e+00
   2.5509036e+01  -2.4263564e+01   3.0000000e+02  -2.5515942e+00   8.1795595e-01  -3.7191556e+00
   2.5467747e+01  -2.4140284e+01   3.0000000e+02  -2.3312017e+00   6.0920332e-01  -3.9400648e+00
   2.5420444e+01  -2.4018831e+01   3.0000000e+02  -2.0997441e+00   3.8170742e-01  -4.1403998e+00
   2.5367238e+01  -2.3899449e+01   3.0000000e+02  -1.8587690e+00   1.3586750e-01  -4.3163046e+00
   2.5308254e+01  -2.3782379e+01   3.0000000e+02  -1.6103605e+00  -1.2733383e-01  -4.4640740e+00
   2.5243625e+01  -2.3667857e+01   3.0000000e+02  -1.3570726e+00  -4.0636812e-01  -4.5803774e+00
   2.5173494e+01  -2.3556112e+01   3.0000000e+02  -1.1018199e+00  -6.9922628e-01  -4.6624389e+00
   2.5098015e+01  -2.3447369e+01   3.0000000e+02  -8.4773895e-01  -1.0034980e+00  -4.7081658e+00
   2.5017352e+01  -2.3341845e+01   3.0000000e+02  -5.9802855e-01  -1.3164815e+00  -4.7162222e+00
   2.4931676e+01  -2.3239751e+01   3.0000000e+02  -3.5580628e-01  -1.6352934e+00  -4.6860424e+00
   2.4841169e+01  -2.3141288e+01   3.0000000e+02  -1.2399832e-01  -1.9569804e+00  -4.6177975e+00
   2.4746020e+01  -2.3046654e+01   3.0000000e+02   9.4744802e-02  -2.2786212e+00  -4.5123385e+00
   2.4646427e+01  -2.2956035e+01   3.0000000e+02   2.9810920e-01  -2.5974435e+00  -4.3711130e+00
   2.4542595e+01  -2.2869611e+01   3.0000000e+02   4.8415719e-01  -2.9109132e+00  -4.1960764e+00
   2.4434735e+01  -2.2787553e+01   3.0000000e+02   6.5136489e-01  -3.2168265e+00  -3.9895866e+00
   2.4323068e+01  -2.2710022e+01   3.0000000e+02   7.9865101e-01  -3.5133716e+00  -3.7542917e+00
   2.4207817e+01  -2.2637172e+01   3.0000000e+02   9.2542452e-01  -3.7991791e+00  -3.4929956e+00
   2.4089216e+01  -2.2569145e+01   3.0000000e+02   1.0316089e+00  -4.0733202e+00  -3.2085212e+00
   2.3967500e+01  -2.2506075e+01   3.0000000e+02   1.1176820e+00  -4.3352842e+00  -2.9035557e+00
   2.3842912e+01  -2.2448087e+01   3.0000000e+02   1.1846798e+00  -4.5848926e+00  -2.5805236e+00
   2.3715699e+01  -2.2395293e+01   3.0000000e+02   1.2341847e+00  -4.8221946e+00  -2.2414635e+00
   2.3586111e+01  -2.2347797e+01   3.0000000e+02   1.2682879e+00  -5.0473244e+00  -1.8879642e+00
   2.3454405e+01  -2.2305692e+01   3.0000000e+02   1.2895162e+00  -5.2603468e+00  -1.5211542e+00
   2.3320837e+01  -2.2269060e+01   3.0000000e+02   1.3007433e+00  -5.4611272e+00  -1.1417257e+00
   2.3185671e+01  -2.2237973e+01   3.0000000e+02   1.3050783e+00  -5.6492014e+00  -7.5005369e-01
   2.3049170e+01  -2.2212492e+01   3.0000000e+02   1.3057529e+00  -5.8237095e+00  -3.4631233e-01
   2.2911600e+01  -2.2192666e+01   3.0000000e+02   1.3060046e+00  -5.9833561e+00   6.9348074e-02
   2.2773229e+01  -2.2178534e+01   3.0000000e+02   1.3089766e+00  -6.1264238e+00   4.9661834e-01
   2.2634327e+01  -2.2170124e+01   3.0000000e+02   1.3176287e+00  -6.2508315e+00   9.3484873e-01
   2.2495164e+01  -2.2167452e+01   3.0000000e+02   1.3346666e+00  -6.3542361e+00   1.3828859e+00
   2.2356011e+01  -2.2170523e+01   3.0000000e+02   1.3624936e+00  -6.4341696e+00   1.8389228e+00
   2.2217137e+01  -2.2179331e+01   3.0000000e+02   1.4031796e+00  -6.4882101e+00   2.3003985e+00
   2.2078813e+01  -2.2193860e+01   3.0000000e+02   1.4584454e+00  -6.5141742e+00   2.7639207e+00
   2.1941309e+01  -2.2214080e+01   3.0000000e+02   1.5296445e+00  -6.5103264e+00   3.2252727e+00
   2.1804892e+01  -2.2239952e+01   3.0000000e+02   1.6177702e+00  -6.4755813e+00   3.6794765e+00
   2.1669828e+01  -2.2271426e+01   3.0000000e+02   1.7234447e+00  -6.4096813e+00   4.1209156e+00
   2.1536382e+01  -2.2308441e+01   3.0000000e+02   1.8469088e+00  -6.3133296e+00   4.5435250e+00
   2.1404814e+01  -2.2350923e+01   3.0000000e+02   1.9880017e+00  -6.1882552e+00   4.9410484e+00
   2.1275383e+01  -2.2398790e+01   3.0000000e+02   2.1461546e+00  -6.0372028e+00   5.3072864e+00
   2.1148344e+01  -2.2451949e+01   3.0000000e+02   2.3203640e+00  -5.8638399e+00   5.6363816e+00
   2.1023948e+01  -2.2510294e+01   3.0000000e+02   2.5091681e+00  -5.6725931e+00   5.9230700e+00
   2.0902441e+01  -2.2573713e+01   3.0000000e+02   2.7106600e+00  -5.4684282e+00   6.1628804e+00
   2.0784065e+01  -2.2642079e+01   3.0000000e+02   2.9224646e+00  -5.2566056e+00   6.3522959e+00
   2.0669056e+01  -2.2715259e+01   3.0000000e+02   3.1417862e+00  -5.0424253e+00   6.4888368e+00
   2.0557645e+01  -2.2793110e+01   3.0000000e+02   3.3654362e+00  -4.8309952e+00   6.5711006e+00
   2.0450059e+01  -2.2875477e+01   3.0000000e+02   3.5898876e+00  -4.6270335e+00   6.5987573e+00
   2.0346514e+01  -2.2962198e+01   3.0000000e+02   3.8113697e+00  -4.4346972e+00   6.5725078e+00
   2.0247223e+01  -2.3053101e+01   3.0000000e+02   4.0259608e+00  -4.2574856e+00   6.4940013e+00
   2.0152390e+01  -2.3148008e+01   3.0000000e+02   4.2297130e+00  -4.0981610e+00   6.3657414e+00
   2.0062213e+01  -2.3246729e+01   3.0000000e+02   4.4187636e+00  -3.9587235e+00   6.1909852e+00
   1.9976880e+01  -2.3349068e+01   3.0000000e+02   4.5894755e+00  -3.8404110e+00   5.9735998e+00
   1.9896571e+01  -2.3454823e+01   3.0000000e+02   4.7385534e+00  -3.7437397e+00   5.7179081e+00
   1.9821459e+01  -2.3563781e+01   3.0000000e+02   4.8631327e+00  -3.6685657e+00   5.4285453e+00
   1.9751705e+01  -2.3675726e+01   3.0000000e+02   4.9608584e+00  -3.6141626e+00   5.1102728e+00
   1.9687464e+01  -2.3790433e+01   3.0000000e+02   5.0299098e+00  -3.5793263e+00   4.7678324e+00
   1.9628877e+01  -2.3907671e+01   3.0000000e+02   5.0689946e+00  -3.5624666e+00   4.4058128e+00
   1.9576078e+01  -2.4027205e+01   3.0000000e+02   5.0773159e+00  -3.5617264e+00   4.0285241e+00
   1.9529189e+01  -2.4148793e+01   3.0000000e+02   5.0545064e+00  -3.5750679e+00   3.6399570e+00
   1.9488322e+01  -2.4272190e+01   3.0000000e+02   5.0005629e+00  -3.6003651e+00   3.2437445e+00
   1.9453576e+01  -2.4397145e+01   3.0000000e+02   4.9157849e+00  -3.6354668e+00   2.8432006e+00
   1.9425041e+01  -2.4523405e+01   3.0000000e+02   4.8007368e+00  -3.6782619e+00   2.4413441e+00
   1.9402792e+01  -2.4650711e+01   3.0000000e+02   4.6562356e+00  -3.7267079e+00   2.0409846e+00
   1.9386895e+01  -2.4778802e+01   3.0000000e+02   4.4833683e+00  -3.7788723e+00   1.6447437e+00
   1.9377401e+01  -2.4907418e+01   3.0000000e+02   4.2835167e+00  -3.8329447e+00   1.2550854e+00
   1.9374351e+01  -2.5036291e+01   3.0000000e+02   4.0584124e+00  -3.8872505e+00   8.7432628e-01
   1.9377770e+01  -2.5165157e+01   3.0000000e+02   3.8101420e+00  -3.9402513e+00   5.0456859e-01
   1.9387672e+01  -2.5293749e+01   3.0000000e+02   3.5411590e+00  -3.9905411e+00   1.4763822e-01
   1.9404057e+01  -2.5421799e+01   3.0000000e+02   3.2542409e+00  -4.0368252e+00  -1.9500205e-01
   1.9426911e+01  -2.5549041e+01   3.0000000e+02   2.9524011e+00  -4.0778911e+00  -5.2234410e-01
   1.9456209e+01  -2.5675208e+01   3.0000000e+02   2.6387773e+00  -4.1125697e+00  -8.3389802e-01
   1.9491908e+01  -2.5800036e+01   3.0000000e+02   2.3164770e+00  -4.1396798e+00  -1.1297013e+00
   1.9533954e+01  -2.5923262e+01   3.0000000e+02   1.9884304e+00  -4.1579854e+00  -1.4103009e+00
   1.9714474e+01  -2.6573850e+01   3.0000000e+02   2.4138332e-01  -3.9949576e+00  -2.2654030e+00
   1.9792084e+01  -2.6681696e+01   3.0000000e+02  -6.8144068e-02  -3.9427540e+00  -2.4662300e+00
   1.9874991e+01  -2.6786394e+01   3.0000000e+02  -3.7406597e-01  -3.8723708e+00  -2.6593927e+00
   1.9963048e+01  -2.6887738e+01   3.0000000e+02  -6.7603474e-01  -3.7825825e+00  -2.8443840e+00
   2.0056096e+01  -2.6985528e+01   3.0000000e+02  -9.7348634e-01  -3.6724284e+00  -3.0202282e+00
   2.0153966e+01  -2.7079572e+01   3.0000000e+02  -1.2655543e+00  -3.5412492e+00  -3.1855947e+00
   2.0256476e+01  -2.7169685e+01   3.0000000e+02  -1.5510309e+00  -3.3886943e+00  -3.3389221e+00
   2.0363436e+01  -2.7255686e+01   3.0000000e+02  -1.8283915e+00  -3.2146948e+00  -3.4785607e+00
   2.0474643e+01  -2.7337406e+01   3.0000000e+02  -2.0958853e+00  -3.0194097e+00  -3.6028444e+00
   2.0589885e+01  -2.7414681e+01   3.0000000e+02  -2.3516377e+00  -2.8031762e+00  -3.7101559e+00
   2.0708943e+01  -2.7487358e+01   3.0000000e+02  -2.5937935e+00  -2.5664598e+00  -3.7989197e+00
   2.0831584e+01  -2.7555290e+01   3.0000000e+02  -2.8206279e+00  -2.3098574e+00  -3.8675585e+00
   2.0957571e+01  -2.7618341e+01   3.0000000e+02  -3.0306744e+00  -2.0341050e+00  -3.9144480e+00
   2.1086657e+01  -2.7676384e+01   3.0000000e+02  -3.2228002e+00  -1.7401515e+00  -3.9378615e+00
   2.1218587e+01  -2.7729303e+01   3.0000000e+02  -3.3962694e+00  -1.4292463e+00  -3.9359522e+00
   2.1353099e+01  -2.7776990e+01   3.0000000e+02  -3.5507716e+00  -1.1030458e+00  -3.9067886e+00
   2.1489926e+01  -2.7819350e+01   3.0000000e+02  -3.6864419e+00  -7.6370799e-01  -3.8484212e+00
   2.1628795e+01  -2.7856296e+01   3.0000000e+02  -3.8038456e+00  -4.1398397e-01  -3.7590220e+00
   2.1769425e+01  -2.7887753e+01   3.0000000e+02  -3.9039558e+00  -5.7272374e-02  -3.6370471e+00
   2.1911535e+01  -2.7913657e+01   3.0000000e+02  -3.9881111e+00   3.0239165e-01  -3.4814433e+00
   2.2054838e+01  -2.7933957e+01   3.0000000e+02  -4.0579471e+00   6.6037436e-01  -3.2918633e+00
   2.2199043e+01  -2.7948610e+01   3.0000000e+02  -4.1153095e+00   1.0115656e+00  -3.0688971e+00
   2.2343859e+01  -2.7957588e+01   3.0000000e+02  -4.1621600e+00   1.3505850e+00  -2.8142323e+00
   2.2488992e+01  -2.7960870e+01   3.0000000e+02  -4.2004630e+00   1.6720323e+00  -2.5307971e+00
   2.2634147e+01  -2.7958452e+01   3.0000000e+02  -4.2320832e+00   1.9708056e+00  -2.2227545e+00
   2.2779029e+01  -2.7950337e+01   3.0000000e+02  -4.2586888e+00   2.2424244e+00  -1.8954321e+00
   2.2923346e+01  -2.7936543e+01   3.0000000e+02  -4.2816803e+00   2.4833334e+00  -1.5550778e+00
   2.3066804e+01  -2.7917097e+01   3.0000000e+02  -4.3021449e+00   2.6911174e+00  -1.2085698e+00
   2.3209114e+01  -2.7892039e+01   3.0000000e+02  -4.3208459e+00   2.8646351e+00  -8.6300362e-01
   2.3349987e+01  -2.7861420e+01   3.0000000e+02  -4.3382414e+00   3.0040114e+00  -5.2531098e-01
   2.3489141e+01  -2.7825302e+01   3.0000000e+02  -4.3545315e+00   3.1105305e+00  -2.0187431e-01
   2.3626295e+01  -2.7783759e+01   3.0000000e+02  -4.3697222e+00   3.1864222e+00   1.0174494e-01
   2.3761176e+01  -2.7736873e+01   3.0000000e+02  -4.3837008e+00   3.2346042e+00   3.8099775e-01
   2.3893514e+01  -2.7684741e+01   3.0000000e+02  -4.3963034e+00   3.2583992e+00   6.3242314e-01
   2.4023048e+01  -2.7627467e+01   3.0000000e+02  -4.4073794e+00   3.2612779e+00   8.5361226e-01
   2.4149521e+01  -2.7565168e+01   3.0000000e+02  -4.4168309e+00   3.2466432e+00   1.0431033e+00
   2.4272685e+01  -2.7497967e+01   3.0000000e+02  -4.4246389e+00   3.2176779e+00   1.2002204e+00
   2.4392301e+01  -2.7426001e+01   3.0000000e+02  -4.4308613e+00   3.1772468e+00   1.3249250e+00
   2.4508136e+01  -2.7349414e+01   3.0000000e+02  -4.4356228e+00   3.1278578e+00   1.4176195e+00
   2.4619969e+01  -2.7268357e+01   3.0000000e+02  -4.4390865e+00   3.0716559e+00   1.4790205e+00
   2.4727586e+01  -2.7182994e+01   3.0000000e+02  -4.4414169e+00   3.0104438e+00   1.5100504e+00
   2.4830783e+01  -2.7093494e+01   3.0000000e+02  -4.4427440e+00   2.9457132e+00   1.5117403e+00
   2.4929369e+01  -2.7000034e+01   3.0000000e+02  -4.4431189e+00   2.8786730e+00   1.4851941e+00
   2.5023159e+01  -2.6902800e+01   3.0000000e+02  -4.4424762e+00   2.8102833e+00   1.4315432e+00
   2.5111984e+01  -2.6801982e+01   3.0000000e+02  -4.4405938e+00   2.7412716e+00   1.3519468e+00
   2.5195681e+01  -2.6697780e+01   3.0000000e+02  -4.4370629e+00   2.6721647e+00   1.2475880e+00
   2.5274103e+01  -2.6590398e+01   3.0000000e+02  -4.4312655e+00   2.6033018e+00   1.1196988e+00
   2.5347112e+01  -2.6480045e+01   3.0000000e+02  -4.4223711e+00   2.5348659e+00   9.6957355e-01
   2.5414581e+01  -2.6366936e+01   3.0000000e+02  -4.4093539e+00   2.4669056e+00   7.9861119e-01
   2.5476398e+01  -2.6251292e+01   3.0000000e+02  -4.3910350e+00   2.3993514e+00   6.0835609e-01
   2.5532459e+01  -2.6133336e+01   3.0000000e+02  -4.3661483e+00   2.3320372e+00   4.0049460e-01
   2.5582675e+01  -2.6013296e+01   3.0000000e+02  -4.3334227e+00   2.2646975e+00   1.7688250e-01
   2.5626968e+01  -2.5891402e+01   3.0000000e+02  -4.2916690e+00   2.1969652e+00  -6.0490867e-02
   2.5665272e+01  -2.5767889e+01   3.0000000e+02  -4.2398597e+00   2.1283561e+00  -3.0953566e-01
   2.5697533e+01  -2.5642992e+01   3.0000000e+02  -4.1771861e+00   2.0582468e+00  -5.6813630e-01
   2.5723708e+01  -2.5516949e+01   3.0000000e+02  -4.1030872e+00   1.9858535e+00  -8.3421488e-01
   2.5743768e+01  -2.5390000e+01   3.0000000e+02  -4.0172443e+00   1.9102108e+00  -1.1057924e+00
   2.5757695e+01  -2.5262384e+01   3.0000000e+02  -3.9195383e+00   1.8301613e+00  -1.3810464e+00
   2.5765480e+01  -2.5134343e+01   3.0000000e+02  -3.8099854e+00   1.7443591e+00  -1.6583174e+00
   2.5767130e+01  -2.5006116e+01   3.0000000e+02  -3.6886561e+00   1.6512783e+00  -1.9360820e+00
   2.5762661e+01  -2.4877945e+01   3.0000000e+02  -3.5556005e+00   1.5492557e+00  -2.2128818e+00
   2.5752099e+01  -2.4750069e+01   3.0000000e+02  -3.4107876e+00   1.4365388e+00  -2.4872267e+00
   2.5735483e+01  -2.4622726e+01   3.0000000e+02  -3.2540930e+00   1.3113610e+00  -2.7574562e+00
   2.5712863e+01  -2.4496152e+01   3.0000000e+02  -3.0853295e+00   1.1720321e+00  -3.0216160e+00
   2.5684298e+01  -2.4370582e+01   3.0000000e+02  -2.9043303e+00   1.0170424e+00  -3.2773605e+00
   2.5649858e+01  -2.4246248e+01   3.0000000e+02  -2.7110702e+00   8.4516685e-01  -3.5219061e+00
   2.5609623e+01  -2.4123378e+01   3.0000000e+02  -2.5058032e+00   6.5556193e-01  -3.7520589e+00
   2.5563683e+01  -2.4002198e+01   3.0000000e+02  -2.2891938e+00   4.4784979e-01  -3.9643102e+00
   2.5512139e+01  -2.3882929e+01   3.0000000e+02  -2.0624047e+00   2.2216819e-01  -4.1550018e+00
   2.5455099e+01  -2.3765790e+01   3.0000000e+02  -1.8271268e+00  -2.0806709e-02  -4.3205279e+00
   2.5392680e+01  -2.3650995e+01   3.0000000e+02  -1.5855450e+00  -2.7987833e-01  -4.4575438e+00
   2.5325011e+01  -2.3538751e+01   3.0000000e+02  -1.3402507e+00  -5.5337459e-01  -4.5631477e+00
   2.5252227e+01  -2.3429262e+01   3.0000000e+02  -1.0941085e+00  -8.3921466e-01  -4.6350242e+00
   2.5174470e+01  -2.3322726e+01   3.0000000e+02  -8.5011041e-01  -1.1349984e+00  -4.6715278e+00
   2.5091893e+01  -2.3219335e+01   3.0000000e+02  -6.1124825e-01  -1.4380939e+00  -4.6717112e+00
   2.5004655e+01  -2.3119276e+01   3.0000000e+02  -3.8039430e-01  -1.7457376e+00  -4.6353172e+00
   2.4912921e+01  -2.3022729e+01   3.0000000e+02  -1.6021812e-01  -2.0551353e+00  -4.5627369e+00
   2.4816865e+01  -2.2929866e+01   3.0000000e+02   4.6863178e-02  -2.3635551e+00  -4.4549532e+00
   2.4716668e+01  -2.2840855e+01   3.0000000e+02   2.3872230e-01  -2.6684171e+00  -4.3134793e+00
   2.4612515e+01  -2.2755854e+01   3.0000000e+02   4.1355865e-01  -2.9673990e+00  -4.1402798e+00
   2.4504600e+01  -2.2675015e+01   3.0000000e+02   5.6991885e-01  -3.2585040e+00  -3.9376930e+00
   2.4393119e+01  -2.2598482e+01   3.0000000e+02   7.0674395e-01  -3.5401420e+00  -3.7083221e+00
   2.4278276e+01  -2.2526391e+01   3.0000000e+02   8.2340285e-01  -3.8111633e+00  -3.4549206e+00
   2.4160281e+01  -2.2458871e+01   3.0000000e+02   9.1973845e-01  -4.0708713e+00  -3.1802539e+00
   2.4039345e+01  -2.2396042e+01   3.0000000e+02   9.9610673e-01  -4.3190024e+00  -2.8869407e+00
   2.3915687e+01  -2.2338014e+01   3.0000000e+02   1.0533866e+00  -4.5556419e+00  -2.5773189e+00
   2.3789528e+01  -2.2284891e+01   3.0000000e+02   1.0929824e+00  -4.7811165e+00  -2.2533202e+00
   2.3661093e+01  -2.2236767e+01   3.0000000e+02   1.1167870e+00  -4.9958525e+00  -1.9163871e+00
   2.3530612e+01  -2.2193726e+01   3.0000000e+02   1.1271205e+00  -5.2002168e+00  -1.5674477e+00
   2.3398314e+01  -2.2155846e+01   3.0000000e+02   1.1266550e+00  -5.3943726e+00  -1.2069375e+00
   2.3264435e+01  -2.2123192e+01   3.0000000e+02   1.1183048e+00  -5.5781418e+00  -8.3489656e-01
   2.3129212e+01  -2.2095823e+01   3.0000000e+02   1.1051313e+00  -5.7509178e+00  -4.5109768e-01
   2.2992881e+01  -2.2073786e+01   3.0000000e+02   1.0902296e+00  -5.9116203e+00  -5.5199195e-02
   2.2855685e+01  -2.2057121e+01   3.0000000e+02   1.0766379e+00  -6.0586833e+00   3.5304540e-01
   2.2717864e+01  -2.2045857e+01   3.0000000e+02   1.0672489e+00  -6.1901101e+00   7.7363329e-01
   2.2579660e+01  -2.2040014e+01   3.0000000e+02   1.0647451e+00  -6.3035525e+00   1.2061220e+00
   2.2441316e+01  -2.2039602e+01   3.0000000e+02   1.0715486e+00  -6.3964335e+00   1.6494786e+00
   2.2303075e+01  -2.2044622e+01   3.0000000e+02   1.0897913e+00  -6.4661018e+00   2.1019578e+00
   2.2165180e+01  -2.2055065e+01   3.0000000e+02   1.1212960e+00  -6.5100107e+00   2.5610190e+00
   2.2027873e+01  -2.2070913e+01   3.0000000e+02   1.1675729e+00  -6.5259140e+00   3.0232934e+00
   2.1891396e+01  -2.2092137e+01   3.0000000e+02   1.2298145e+00  -6.5120657e+00   3.4846033e+00
   2.1755989e+01  -2.2118700e+01   3.0000000e+02   1.3089051e+00  -6.4674092e+00   3.9400502e+00
   2.1621891e+01  -2.2150556e+01   3.0000000e+02   1.4054174e+00  -6.3917356e+00   4.3841543e+00
   2.1489339e+01  -2.2187648e+01   3.0000000e+02   1.5196021e+00  -6.2857932e+00   4.8110555e+00
   2.1358566e+01  -2.2229911e+01   3.0000000e+02   1.6513837e+00  -6.1513302e+00   5.2147515e+00
   2.1229806e+01  -2.2277270e+01   3.0000000e+02   1.8003389e+00  -5.9910713e+00   5.5893334e+00
   2.1103288e+01  -2.2329641e+01   3.0000000e+02   1.9656798e+00  -5.8086121e+00   5.9292504e+00
   2.0979236e+01  -2.2386931e+01   3.0000000e+02   2.1462364e+00  -5.6082526e+00   6.2295265e+00
   2.0857874e+01  -2.2449039e+01   3.0000000e+02   2.3404443e+00  -5.3947978e+00   6.4859188e+00
   2.0739418e+01  -2.2515856e+01   3.0000000e+02   2.5463411e+00  -5.1733139e+00   6.6950606e+00
   2.0624084e+01  -2.2587261e+01   3.0000000e+02   2.7615598e+00  -4.9489122e+00   6.8545144e+00
   2.0512081e+01  -2.2663129e+01   3.0000000e+02   2.9833754e+00  -4.7265255e+00   6.9627983e+00
   2.0403611e+01  -2.2743324e+01   3.0000000e+02   3.2087220e+00  -4.5107284e+00   7.0193781e+00
   2.0298876e+01  -2.2827704e+01   3.0000000e+02   3.4342646e+00  -4.3056132e+00   7.0245996e+00
   2.0198066e+01  -2.2916117e+01   3.0000000e+02   3.6564604e+00  -4.1146646e+00   6.9796590e+00
   2.0101371e+01  -2.3008406e+01   3.0000000e+02   3.8716652e+00  -3.9407247e+00   6.8864933e+00
   2.0008971e+01  -2.3104406e+01   3.0000000e+02   4.0762261e+00  -3.7859423e+00   6.7477195e+00
   1.9921040e+01  -2.3203944e+01   3.0000000e+02   4.2665924e+00  -3.6517818e+00   6.5665313e+00
   1.9837745e+01  -2.3306841e+01   3.0000000e+02   4.4394301e+00  -3.5390460e+00   6.3465859e+00
   1.9759248e+01  -2.3412912e+01   3.0000000e+02   4.5917237e+00  -3.4479267e+00   6.0918786e+00
   1.9685700e+01  -2.3521966e+01   3.0000000e+02   4.7208539e+00  -3.3780554e+00   5.8066214e+00
   1.9617246e+01  -2.3633805e+01   3.0000000e+02   4.8246551e+00  -3.3285905e+00   5.4951057e+00
   1.9554023e+01  -2.3748227e+01   3.0000000e+02   4.9014426e+00  -3.2983002e+00   5.1615667e+00
   1.9496160e+01  -2.3865024e+01   3.0000000e+02   4.9500015e+00  -3.2856510e+00   4.8100811e+00
   1.9443775e+01  -2.3983984e+01   3.0000000e+02   4.9695505e+00  -3.2888886e+00   4.4444818e+00
   1.9396979e+01  -2.4104888e+01   3.0000000e+02   4.9596877e+00  -3.3061224e+00   4.0683144e+00
   1.9355873e+01  -2.4227516e+01   3.0000000e+02   4.9203296e+00  -3.3353918e+00   3.6848082e+00
   1.9320549e+01  -2.4351643e+01   3.0000000e+02   4.8516529e+00  -3.3747192e+00   3.2969126e+00
   1.9291088e+01  -2.4477041e+01   3.0000000e+02   4.7540570e+00  -3.4221512e+00   2.9073401e+00
   1.9267562e+01  -2.4603478e+01   3.0000000e+02   4.6281544e+00  -3.4757929e+00   2.5186233e+00
   1.9250032e+01  -2.4730719e+01   3.0000000e+02   4.4747841e+00  -3.5338301e+00   2.1331677e+00
   1.9238550e+01  -2.4858530e+01   3.0000000e+02   4.2950434e+00  -3.5945539e+00   1.7532660e+00
   1.9233154e+01  -2.4986671e+01   3.0000000e+02   4.0903380e+00  -3.6563609e+00   1.3811357e+00
   1.9233875e+01  -2.5114905e+01   3.0000000e+02   3.8624125e+00  -3.7177794e+00   1.0188420e+00
   1.9240730e+01  -2.5242990e+01   3.0000000e+02   3.6133779e+00  -3.7774556e+00   6.6827543e-01
   1.9253725e+01  -2.5370685e+01   3.0000000e+02   3.3456900e+00  -3.8341559e+00   3.3104074e-01
   1.9272856e+01  -2.5497751e+01   3.0000000e+02   3.0620930e+00  -3.8867521e+00   8.3601736e-03
   1.9298106e+01  -2.5623947e+01   3.0000000e+02   2.7655347e+00  -3.9341881e+00  -2.9899310e-01
   1.9329446e+01  -2.5749033e+01   3.0000000e+02   2.4590349e+00  -3.9754457e+00  -5.9076146e-01
   1.9366837e+01  -2.5872771e+01   3.0000000e+02   2.1455373e+00  -4.0095021e+00  -8.6722279e-01
   1.9410225e+01  -2.5994925e+01   3.0000000e+02   1.8277607e+00  -4.0352782e+00  -1.1291346e+00
   1.9459548e+01  -2.6115262e+01   3.0000000e+02   1.5080660e+00  -4.0516055e+00  -1.3776566e+00
   1.9514729e+01  -2.6233549e+01   3.0000000e+02   1.1883736e+00  -4.0571940e+00  -1.6141792e+00
   1.9575679e+01  -2.6349558e+01   3.0000000e+02   8.7011347e-01  -4.0506312e+00  -1.8401529e+00
   1.9642298e+01  -2.6463065e+01   3.0000000e+02   5.5425297e-01  -4.0304056e+00  -2.0568942e+00
   1.9948419e+01  -2.7071110e+01   3.0000000e+02  -1.0669315e+00  -3.6198215e+00  -2.6581547e+00
   2.0046386e+01  -2.7165472e+01   3.0000000e+02  -1.3504275e+00  -3.5040791e+00  -2.8183394e+00
   2.0148837e+01  -2.7256058e+01   3.0000000e+02  -1.6284289e+00  -3.3683274e+00  -2.9680459e+00
   2.0255598e+01  -2.7342702e+01   3.0000000e+02  -1.8994421e+00  -3.2124702e+00  -3.1057290e+00
   2.0366482e+01  -2.7425244e+01   3.0000000e+02  -2.1616905e+00  -3.0365990e+00  -3.2298674e+00
   2.0481296e+01  -2.7503533e+01   3.0000000e+02  -2.4132414e+00  -2.8409239e+00  -3.3390224e+00
   2.0599836e+01  -2.7577424e+01   3.0000000e+02  -2.6521273e+00  -2.6257301e+00  -3.4318219e+00
   2.0721891e+01  -2.7646780e+01   3.0000000e+02  -2.8764822e+00  -2.3913513e+00  -3.5069144e+00
   2.0847241e+01  -2.7711473e+01   3.0000000e+02  -3.0846533e+00  -2.1381890e+00  -3.5628862e+00
   2.0975661e+01  -2.7771382e+01   3.0000000e+02  -3.2752896e+00  -1.8667661e+00  -3.5981966e+00
   2.1106917e+01  -2.7826395e+01   3.0000000e+02  -3.4474026e+00  -1.5778240e+00  -3.6111174e+00
   2.1240769e+01  -2.7876411e+01   3.0000000e+02  -3.6004102e+00  -1.2724293e+00  -3.5997239e+00
   2.1376971e+01  -2.7921334e+01   3.0000000e+02  -3.7341482e+00  -9.5209776e-01  -3.5619519e+00
   2.1515271e+01  -2.7961082e+01   3.0000000e+02  -3.8488874e+00  -6.1889667e-01  -3.4956730e+00
   2.1655413e+01  -2.7995579e+01   3.0000000e+02  -3.9453155e+00  -2.7553271e-01  -3.3988605e+00
   2.1797138e+01  -2.8024762e+01   3.0000000e+02  -4.0245220e+00   7.4604238e-02  -3.2697581e+00
   2.1940180e+01  -2.8048574e+01   3.0000000e+02  -4.0879485e+00   4.2742508e-01  -3.1071203e+00
   2.2084271e+01  -2.8066971e+01   3.0000000e+02  -4.1373371e+00   7.7821505e-01  -2.9104301e+00
   2.2229144e+01  -2.8079920e+01   3.0000000e+02  -4.1746482e+00   1.1217705e+00  -2.6801291e+00
   2.2374524e+01  -2.8087394e+01   3.0000000e+02  -4.2019617e+00   1.4525845e+00  -2.4178366e+00
   2.2520141e+01  -2.8089380e+01   3.0000000e+02  -4.2213778e+00   1.7651585e+00  -2.1264348e+00
   2.2665719e+01  -2.8085875e+01   3.0000000e+02  -4.2349080e+00   2.0543024e+00  -1.8101176e+00
   2.2810986e+01  -2.8076885e+01   3.0000000e+02  -4.2443807e+00   2.3154958e+00  -1.4742724e+00
   2.2955670e+01  -2.8062427e+01   3.0000000e+02  -4.2513631e+00   2.5451843e+00  -1.1252532e+00
   2.3099498e+01  -2.8042528e+01   3.0000000e+02  -4.2571096e+00   2.7410073e+00  -7.7005448e-01
   2.3242202e+01  -2.8017226e+01   3.0000000e+02  -4.2625410e+00   2.9019259e+00  -4.1589349e-01
   2.3383515e+01  -2.7986567e+01   3.0000000e+02  -4.2682547e+00   3.0282099e+00  -6.9817426e-02
   2.3523174e+01  -2.7950611e+01   3.0000000e+02  -4.2745591e+00   3.1213174e+00   2.6169537e-01
   2.3660920e+01  -2.7909424e+01   3.0000000e+02  -4.2815357e+00   3.1836777e+00   5.7300625e-01
   2.3796496e+01  -2.7863083e+01   3.0000000e+02  -4.2891064e+00   3.2184187e+00   8.5950950e-01
   2.3929654e+01  -2.7811676e+01   3.0000000e+02  -4.2971025e+00   3.2290798e+00   1.1177266e+00
   2.4060150e+01  -2.7755298e+01   3.0000000e+02  -4.3053318e+00   3.2193434e+00   1.3452494e+00
   2.4187744e+01  -2.7694055e+01   3.0000000e+02  -4.3136240e+00   3.1928141e+00   1.5406430e+00
   2.4312205e+01  -2.7628060e+01   3.0000000e+02  -4.3218626e+00   3.1528584e+00   1.7032915e+00
   2.4433310e+01  -2.7557436e+01   3.0000000e+02  -4.3299935e+00   3.1025032e+00   1.8332269e+00
   2.4550840e+01  -2.7482315e+01   3.0000000e+02  -4.3380226e+00   3.0443938e+00   1.9309431e+00
   2.4664587e+01  -2.7402835e+01   3.0000000e+02  -4.3459974e+00   2.9807868e+00   1.9972579e+00
   2.4774350e+01  -2.7319142e+01   3.0000000e+02  -4.3539808e+00   2.9135716e+00   2.0331884e+00
   2.4879937e+01  -2.7231392e+01   3.0000000e+02  -4.3620189e+00   2.8442996e+00   2.0398756e+00
   2.4981165e+01  -2.7139745e+01   3.0000000e+02  -4.3701116e+00   2.7742192e+00   2.0185079e+00
   2.5077861e+01  -2.7044369e+01   3.0000000e+02  -4.3781761e+00   2.7043014e+00   1.9702974e+00
   2.5169861e+01  -2.6945437e+01   3.0000000e+02  -4.3860134e+00   2.6352654e+00   1.8964492e+00
   2.5257010e+01  -2.6843131e+01   3.0000000e+02  -4.3932731e+00   2.5675989e+00   1.7981668e+00
   2.5339165e+01  -2.6737636e+01   3.0000000e+02  -4.3994250e+00   2.5015797e+00   1.6766483e+00
   2.5416191e+01  -2.6629143e+01   3.0000000e+02  -4.4037385e+00   2.4373057e+00   1.5331067e+00
   2.5487966e+01  -2.6517847e+01   3.0000000e+02  -4.4052780e+00   2.3747202e+00   1.3688063e+00
   2.5554375e+01  -2.6403948e+01   3.0000000e+02  -4.4029231e+00   2.3136510e+00   1.1850929e+00
   2.5615318e+01  -2.6287652e+01   3.0000000e+02  -4.3954135e+00   2.2538302e+00   9.8345133e-01
   2.5670702e+01  -2.6169165e+01   3.0000000e+02  -4.3814198e+00   2.1949263e+00   7.6550101e-01
   2.5720446e+01  -2.6048698e+01   3.0000000e+02  -4.3596298e+00   2.1365485e+00   5.3302776e-01
   2.5764481e+01  -2.5926466e+01   3.0000000e+02  -4.3288413e+00   2.0782470e+00   2.8796202e-01
   2.5802745e+01  -2.5802684e+01   3.0000000e+02  -4.2880434e+00   2.0195056e+00   3.2313747e-02
   2.5835191e+01  -2.5677571e+01   3.0000000e+02  -4.2364778e+00   1.9597147e+00  -2.3186950e-01
   2.5861780e+01  -2.5551347e+01   3.0000000e+02  -4.1736649e+00   1.8981546e+00  -5.0260053e-01
   2.5882485e+01  -2.5424232e+01   3.0000000e+02  -4.0993937e+00   1.8339672e+00  -7.7802209e-01
   2.5897288e+01  -2.5296449e+01   3.0000000e+02  -4.0136769e+00   1.7661405e+00  -1.0564612e+00
   2.5906183e+01  -2.5168220e+01   3.0000000e+02  -3.9166744e+00   1.6934931e+00  -1.3364593e+00
   2.5909172e+01  -2.5039767e+01   3.0000000e+02  -3.8085992e+00   1.6146768e+00  -1.6167611e+00
   2.5906269e+01  -2.4911313e+01   3.0000000e+02  -3.6896261e+00   1.5281892e+00  -1.8962449e+00
   2.5897498e+01  -2.4783078e+01   3.0000000e+02  -3.5598109e+00   1.4324058e+00  -2.1738314e+00
   2.5882891e+01  -2.4655284e+01   3.0000000e+02  -3.4190530e+00   1.3256358e+00  -2.4483417e+00
   2.5862492e+01  -2.4528148e+01   3.0000000e+02  -3.2671005e+00   1.2061881e+00  -2.7183604e+00
   2.5836353e+01  -2.4401889e+01   3.0000000e+02  -3.1036194e+00   1.0724682e+00  -2.9820984e+00
   2.5804534e+01  -2.4276721e+01   3.0000000e+02  -2.9282992e+00   9.2307067e-01  -3.2373187e+00
   2.5767107e+01  -2.4152857e+01   3.0000000e+02  -2.7410069e+00   7.5688537e-01  -3.4813008e+00
   2.5724151e+01  -2.4030507e+01   3.0000000e+02  -2.5419294e+00   5.7318775e-01  -3.7109054e+00
   2.5675754e+01  -2.3909876e+01   3.0000000e+02  -2.3316981e+00   3.7170782e-01  -3.9226992e+00
   2.5622011e+01  -2.3791169e+01   3.0000000e+02  -2.1114677e+00   1.5267999e-01  -4.1131306e+00
   2.5563027e+01  -2.3674584e+01   3.0000000e+02  -1.8829223e+00  -8.3154399e-02  -4.2787390e+00
   2.5498915e+01  -2.3560318e+01   3.0000000e+02  -1.6482274e+00  -3.3455926e-01  -4.4163506e+00
   2.5429794e+01  -2.3448561e+01   3.0000000e+02  -1.4099147e+00  -5.9986312e-01  -4.5232510e+00
   2.5355792e+01  -2.3339499e+01   3.0000000e+02  -1.1707570e+00  -8.7701838e-01  -4.5972944e+00
   2.5277042e+01  -2.3233315e+01   3.0000000e+02  -9.3362529e-01  -1.1636819e+00  -4.6369701e+00
   2.5193686e+01  -2.3130184e+01   3.0000000e+02  -7.0136882e-01  -1.4573031e+00  -4.6414154e+00
   2.5105873e+01  -2.3030278e+01   3.0000000e+02  -4.7672387e-01  -1.7552026e+00  -4.6104007e+00
   2.5013755e+01  -2.2933761e+01   3.0000000e+02  -2.6223994e-01  -2.0546735e+00  -4.5442916e+00
   2.4917495e+01  -2.2840793e+01   3.0000000e+02  -6.0257522e-02  -2.3530510e+00  -4.4440081e+00
   2.4817258e+01  -2.2751528e+01   3.0000000e+02   1.2713343e-01  -2.6478189e+00  -4.3109760e+00
   2.4713215e+01  -2.2666113e+01   3.0000000e+02   2.9811013e-01  -2.9366951e+00  -4.1470733e+00
   2.4605544e+01  -2.2584686e+01   3.0000000e+02   4.5114479e-01  -3.2177188e+00  -3.9545641e+00
   2.4494428e+01  -2.2507383e+01   3.0000000e+02   5.8504568e-01  -3.4893199e+00  -3.7360200e+00
   2.4380052e+01  -2.2434330e+01   3.0000000e+02   6.9901007e-01  -3.7503911e+00  -3.4941963e+00
   2.4262609e+01  -2.2365647e+01   3.0000000e+02   7.9266708e-01  -4.0002981e+00  -3.2319079e+00
   2.4142293e+01  -2.2301445e+01   3.0000000e+02   8.6612922e-01  -4.2388792e+00  -2.9518608e+00
   2.4019305e+01  -2.2241829e+01   3.0000000e+02   9.2001670e-01  -4.4663735e+00  -2.6565073e+00
   2.3893846e+01  -2.2186898e+01   3.0000000e+02   9.5547060e-01  -4.6833278e+00  -2.3478895e+00
   2.3766125e+01  -2.2136739e+01   3.0000000e+02   9.7412232e-01  -4.8904469e+00  -2.0275383e+00
   2.3636349e+01  -2.2091435e+01   3.0000000e+02   9.7805616e-01  -5.0884392e+00  -1.6964059e+00
   2.3504731e+01  -2.2051060e+01   3.0000000e+02   9.6972890e-01  -5.2778411e+00  -1.3548788e+00
   2.3371486e+01  -2.2015679e+01   3.0000000e+02   9.5188068e-01  -5.4588699e+00  -1.0028356e+00
   2.3236830e+01  -2.1985350e+01   3.0000000e+02   9.2743689e-01  -5.6313051e+00  -6.3976585e-01
   2.3100982e+01  -2.1960121e+01   3.0000000e+02   8.9940205e-01  -5.7944097e+00  -2.6493340e-01
   2.2964163e+01  -2.1940034e+01   3.0000000e+02   8.7076956e-01  -5.9469033e+00   1.2243688e-01
   2.2826593e+01  -2.1925122e+01   3.0000000e+02   8.4443276e-01  -6.0869857e+00   5.2297556e-01
   2.2688496e+01  -2.1915408e+01   3.0000000e+02   8.2311269e-01  -6.2123967e+00   9.3696566e-01
   2.2550094e+01  -2.1910909e+01   3.0000000e+02   8.0931208e-01  -6.3205261e+00   1.3641852e+00
   2.2411611e+01  -2.1911631e+01   3.0000000e+02   8.0527032e-01  -6.4085479e+00   1.8037522e+00
   2.2273271e+01  -2.1917574e+01   3.0000000e+02   8.1295262e-01  -6.4735889e+00   2.2540172e+00
   2.2135297e+01  -2.1928727e+01   3.0000000e+02   8.3403230e-01  -6.5129153e+00   2.7125004e+00
   2.1997912e+01  -2.1945073e+01   3.0000000e+02   8.6990278e-01  -6.5241318e+00   3.1758692e+00
   2.1861340e+01  -2.1966586e+01   3.0000000e+02   9.2167734e-01  -6.5053807e+00   3.6399747e+00
   2.1725799e+01  -2.1993229e+01   3.0000000e+02   9.9019044e-01  -6.4555238e+00   4.0999734e+00
   2.1591512e+01  -2.2024961e+01   3.0000000e+02   1.0760183e+00  -6.3742941e+00   4.5504424e+00
   2.1458695e+01  -2.2061730e+01   3.0000000e+02   1.1794603e+00  -6.2623905e+00   4.9856225e+00
   2.1327566e+01  -2.2103475e+01   3.0000000e+02   1.3005352e+00  -6.1215165e+00   5.3996206e+00
   2.1198337e+01  -2.2150129e+01   3.0000000e+02   1.4389759e+00  -5.9543366e+00   5.7866780e+00
   2.1071220e+01  -2.2201616e+01   3.0000000e+02   1.5942026e+00  -5.7643756e+00   6.1413835e+00
   2.0946424e+01  -2.2257853e+01   3.0000000e+02   1.7653095e+00  -5.5558516e+00   6.4588840e+00
   2.0824155e+01  -2.2318747e+01   3.0000000e+02   1.9510372e+00  -5.3334711e+00   6.7350420e+00
   2.0704614e+01  -2.2384199e+01   3.0000000e+02   2.1497725e+00  -5.1022015e+00   6.9665407e+00
   2.0588000e+01  -2.2454103e+01   3.0000000e+02   2.3595412e+00  -4.8670574e+00   7.1509268e+00
   2.0474506e+01  -2.2528343e+01   3.0000000e+02   2.5780067e+00  -4.6328923e+00   7.2866317e+00
   2.0364324e+01  -2.2606800e+01   3.0000000e+02   2.8025135e+00  -4.4042441e+00   7.3729234e+00
   2.0257639e+01  -2.2689343e+01   3.0000000e+02   3.0300974e+00  -4.1851918e+00   7.4098854e+00
   2.0154632e+01  -2.2775838e+01   3.0000000e+02   3.2575662e+00  -3.9792731e+00   7.3983345e+00
   2.0055477e+01  -2.2866142e+01   3.0000000e+02   3.4815509e+00  -3.7894200e+00   7.3397710e+00
   1.9960346e+01  -2.2960106e+01   3.0000000e+02   3.6985999e+00  -3.6179444e+00   7.2362956e+00
   1.9869404e+01  -2.3057577e+01   3.0000000e+02   3.9052761e+00  -3.4665248e+00   7.0905377e+00
   1.9782808e+01  -2.3158392e+01   3.0000000e+02   4.0982413e+00  -3.3362202e+00   6.9055923e+00
   1.9700711e+01  -2.3262384e+01   3.0000000e+02   4.2743708e+00  -3.2275160e+00   6.6849091e+00
   1.9623261e+01  -2.3369382e+01   3.0000000e+02   4.4308420e+00  -3.1403721e+00   6.4321924e+00
   1.9550595e+01  -2.3479208e+01   3.0000000e+02   4.5651958e+00  -3.0742708e+00   6.1513113e+00
   1.9482847e+01  -2.3591678e+01   3.0000000e+02   4.6753928e+00  -3.0283048e+00   5.8461759e+00
   1.9420141e+01  -2.3706605e+01   3.0000000e+02   4.7598338e+00  -3.0012412e+00   5.5206310e+00
   1.9362596e+01  -2.3823796e+01   3.0000000e+02   4.8173499e+00  -2.9916051e+00   5.1783682e+00
   1.9310322e+01  -2.3943055e+01   3.0000000e+02   4.8471685e+00  -2.9977459e+00   4.8228521e+00
   1.9263420e+01  -2.4064182e+01   3.0000000e+02   4.8488600e+00  -3.0178998e+00   4.4572849e+00
   1.9221985e+01  -2.4186972e+01   3.0000000e+02   4.8222815e+00  -3.0502478e+00   4.0845981e+00
   1.9186102e+01  -2.4311218e+01   3.0000000e+02   4.7675205e+00  -3.0929527e+00   3.7074709e+00
   1.9155847e+01  -2.4436709e+01   3.0000000e+02   4.6848581e+00  -3.1441919e+00   3.3283817e+00
   1.9131290e+01  -2.4563232e+01   3.0000000e+02   4.5747581e+00  -3.2021903e+00   2.9496513e+00
   1.9112488e+01  -2.4690571e+01   3.0000000e+02   4.4378748e+00  -3.2652262e+00   2.5735145e+00
   1.9099491e+01  -2.4818509e+01   3.0000000e+02   4.2750919e+00  -3.3316613e+00   2.2021394e+00
   1.9092340e+01  -2.4946827e+01   3.0000000e+02   4.0875692e+00  -3.3999507e+00   1.8376449e+00
   1.9091065e+01  -2.5075303e+01   3.0000000e+02   3.8767924e+00  -3.4686516e+00   1.4820847e+00
   1.9095686e+01  -2.5203716e+01   3.0000000e+02   3.6446002e+00  -3.5364355e+00   1.1373785e+00
   1.9106215e+01  -2.5331844e+01   3.0000000e+02   3.3931935e+00  -3.6020929e+00   8.0523070e-01
   1.9122651e+01  -2.5459465e+01   3.0000000e+02   3.1250997e+00  -3.6645194e+00   4.8704368e-01
   1.9144986e+01  -2.5586355e+01   3.0000000e+02   2.8431083e+00  -3.7227090e+00   1.8380969e-01
   1.9173198e+01  -2.5712294e+01   3.0000000e+02   2.5501468e+00  -3.7757193e+00  -1.0396205e-01
   1.9207258e+01  -2.5837061e+01   3.0000000e+02   2.2491561e+00  -3.8226439e+00  -3.7629818e-01
   1.9247123e+01  -2.5960436e+01   3.0000000e+02   1.9429352e+00  -3.8625621e+00  -6.3374469e-01
   1.9292743e+01  -2.6082202e+01   3.0000000e+02   1.6339900e+00  -3.8945042e+00  -8.7733048e-01
   1.9344055e+01  -2.6202142e+01   3.0000000e+02   1.3244212e+00  -3.9174077e+00  -1.1084345e+00
   1.9400984e+01  -2.6320044e+01   3.0000000e+02   1.0158357e+00  -3.9300945e+00  -1.3286332e+00
   1.9463449e+01  -2.6435698e+01   3.0000000e+02   7.0933333e-01  -3.9312744e+00  -1.5395252e+00
   1.9531353e+01  -2.6548897e+01   3.0000000e+02   4.0555209e-01  -3.9195583e+00  -1.7425109e+00
   1.9604592e+01  -2.6659438e+01   3.0000000e+02   1.0476580e-01  -3.8935136e+00  -1.9386467e+00
   1.9683050e+01  -2.6767121e+01   3.0000000e+02  -1.9296372e-01  -3.8517302e+00  -2.1285054e+00
   1.9766599e+01  -2.6871753e+01   3.0000000e+02  -4.8762424e-01  -3.7928983e+00  -2.3121148e+00
   1.9855105e+01  -2.6973144e+01   3.0000000e+02  -7.7908002e-01  -3.7158910e+00  -2.4889848e+00
   2.0276273e+01  -2.7525541e+01   3.0000000e+02  -2.2564397e+00  -3.0043404e+00  -2.8712764e+00
   2.0391263e+01  -2.7604104e+01   3.0000000e+02  -2.5027370e+00  -2.8263176e+00  -2.9780122e+00
   2.0509864e+01  -2.7678433e+01   3.0000000e+02  -2.7370335e+00  -2.6299798e+00  -3.0701412e+00
   2.0631879e+01  -2.7748401e+01   3.0000000e+02  -2.9573588e+00  -2.4154695e+00  -3.1465755e+00
   2.0757106e+01  -2.7813887e+01   3.0000000e+02  -3.1619393e+00  -2.1829242e+00  -3.2061743e+00
   2.0885336e+01  -2.7874777e+01   3.0000000e+02  -3.3492825e+00  -1.9325321e+00  -3.2476392e+00
   2.1016352e+01  -2.7930967e+01   3.0000000e+02  -3.5182378e+00  -1.6646249e+00  -3.2694306e+00
   2.1149934e+01  -2.7982360e+01   3.0000000e+02  -3.6680314e+00  -1.3797889e+00  -3.2697444e+00
   2.1285852e+01  -2.8028866e+01   3.0000000e+02  -3.7982830e+00  -1.0790049e+00  -3.2465205e+00
   2.1423876e+01  -2.8070404e+01   3.0000000e+02  -3.9090246e+00  -7.6375156e-01  -3.1975168e+00
   2.1563767e+01  -2.8106902e+01   3.0000000e+02  -4.0006969e+00  -4.3613043e-01  -3.1204224e+00
   2.1705286e+01  -2.8138297e+01   3.0000000e+02  -4.0741456e+00  -9.8927554e-02  -3.0130298e+00
   2.1848187e+01  -2.8164533e+01   3.0000000e+02  -4.1305969e+00   2.4432889e-01  -2.8734463e+00
   2.1992222e+01  -2.8185565e+01   3.0000000e+02  -4.1716255e+00   5.8939156e-01  -2.7003224e+00
   2.2137143e+01  -2.8201357e+01   3.0000000e+02  -4.1990956e+00   9.3137446e-01  -2.4931052e+00
   2.2282695e+01  -2.8211879e+01   3.0000000e+02  -4.2150839e+00   1.2648909e+00  -2.2522937e+00
   2.2428627e+01  -2.8217116e+01   3.0000000e+02  -4.2217920e+00   1.5843156e+00  -1.9795967e+00
   2.2574683e+01  -2.8217055e+01   3.0000000e+02  -4.2214402e+00   1.8840675e+00  -1.6780910e+00
   2.2720608e+01  -2.8211700e+01   3.0000000e+02  -4.2161661e+00   2.1589721e+00  -1.3521723e+00
   2.2866149e+01  -2.8201057e+01   3.0000000e+02  -4.2079274e+00   2.4046101e+00  -1.0074571e+00
   2.3011052e+01  -2.8185146e+01   3.0000000e+02  -4.1984211e+00   2.6176138e+00  -6.5049952e-01
   2.3155065e+01  -2.8163996e+01   3.0000000e+02  -4.1890275e+00   2.7958853e+00  -2.8843776e-01
   2.3297937e+01  -2.8137642e+01   3.0000000e+02  -4.1807854e+00   2.9386909e+00   7.1411005e-02
   2.3439422e+01  -2.8106131e+01   3.0000000e+02  -4.1743918e+00   3.0466308e+00   4.2199558e-01
   2.3579274e+01  -2.8069518e+01   3.0000000e+02  -4.1702371e+00   3.1214868e+00   7.5687470e-01
   2.3717252e+01  -2.8027866e+01   3.0000000e+02  -4.1684575e+00   3.1659905e+00   1.0705128e+00
   2.3853120e+01  -2.7981249e+01   3.0000000e+02  -4.1689993e+00   3.1835365e+00   1.3584586e+00
   2.3986646e+01  -2.7929747e+01   3.0000000e+02  -4.1716935e+00   3.1778898e+00   1.6173853e+00
   2.4117601e+01  -2.7873449e+01   3.0000000e+02  -4.1763176e+00   3.1529180e+00   1.8450525e+00
   2.4245765e+01  -2.7812453e+01   3.0000000e+02  -4.1826446e+00   3.1123723e+00   2.0402053e+00
   2.4370922e+01  -2.7746865e+01   3.0000000e+02  -4.1904796e+00   3.0597323e+00   2.2023926e+00
   2.4492862e+01  -2.7676797e+01   3.0000000e+02  -4.1996779e+00   2.9981138e+00   2.3317868e+00
   2.4611383e+01  -2.7602370e+01   3.0000000e+02  -4.2101412e+00   2.9302254e+00   2.4290244e+00
   2.4726290e+01  -2.7523713e+01   3.0000000e+02  -4.2218087e+00   2.8583690e+00   2.4950512e+00
   2.4837393e+01  -2.7440959e+01   3.0000000e+02  -4.2346425e+00   2.7844683e+00   2.5309880e+00
   2.4944514e+01  -2.7354250e+01   3.0000000e+02  -4.2485969e+00   2.7100916e+00   2.5380747e+00
   2.5047479e+01  -2.7263734e+01   3.0000000e+02  -4.2635999e+00   2.6364950e+00   2.5175839e+00
   2.5146126e+01  -2.7169566e+01   3.0000000e+02  -4.2795221e+00   2.5646400e+00   2.4708026e+00
   2.5240299e+01  -2.7071903e+01   3.0000000e+02  -4.2961537e+00   2.4952239e+00   2.3989801e+00
   2.5329851e+01  -2.6970912e+01   3.0000000e+02  -4.3131657e+00   2.4286902e+00   2.3033433e+00
   2.5414645e+01  -2.6866763e+01   3.0000000e+02  -4.3300808e+00   2.3652502e+00   2.1850767e+00
   2.5494552e+01  -2.6759630e+01   3.0000000e+02  -4.3462429e+00   2.3049106e+00   2.0453317e+00
   2.5569454e+01  -2.6649693e+01   3.0000000e+02  -4.3607955e+00   2.2475014e+00   1.8852632e+00
   2.5639242e+01  -2.6537136e+01   3.0000000e+02  -4.3726811e+00   2.1927184e+00   1.7060600e+00
   2.5703813e+01  -2.6422145e+01   3.0000000e+02  -4.3806669e+00   2.1401664e+00   1.5089814e+00
   2.5763079e+01  -2.6304912e+01   3.0000000e+02  -4.3833939e+00   2.0893838e+00   1.2954309e+00
   2.5816957e+01  -2.6185630e+01   3.0000000e+02  -4.3794586e+00   2.0398823e+00   1.0669575e+00
   2.5865377e+01  -2.6064495e+01   3.0000000e+02  -4.3675055e+00   1.9911508e+00   8.2528463e-01
   2.5908276e+01  -2.5941708e+01   3.0000000e+02  -4.3463261e+00   1.9426639e+00   5.7228419e-01
   2.5945602e+01  -2.5817467e+01   3.0000000e+02  -4.3149418e+00   1.8938664e+00   3.0991127e-01
   2.5977311e+01  -2.5691977e+01   3.0000000e+02  -4.2726646e+00   1.8441577e+00   4.0151872e-02
   2.6003372e+01  -2.5565441e+01   3.0000000e+02  -4.2191189e+00   1.7928616e+00  -2.3507818e-01
   2.6023759e+01  -2.5438065e+01   3.0000000e+02  -4.1542259e+00   1.7392074e+00  -5.1401578e-01
   2.6038458e+01  -2.5310053e+01   3.0000000e+02  -4.0781477e+00   1.6822984e+00  -7.9511713e-01
   2.6047463e+01  -2.5181612e+01   3.0000000e+02  -3.9912050e+00   1.6210960e+00  -1.0770864e+00
   2.6050779e+01  -2.5052948e+01   3.0000000e+02  -3.8937711e+00   1.5544055e+00  -1.3588745e+00
   2.6048417e+01  -2.4924267e+01   3.0000000e+02  -3.7861633e+00   1.4808796e+00  -1.6396314e+00
   2.6040400e+01  -2.4795773e+01   3.0000000e+02  -3.6685505e+00   1.3990307e+00  -1.9186021e+00
   2.6026758e+01  -2.4667672e+01   3.0000000e+02  -3.5408966e+00   1.3072719e+00  -2.1949918e+00
   2.6007529e+01  -2.4540166e+01   3.0000000e+02  -3.4029460e+00   1.2039695e+00  -2.4678218e+00
   2.5982761e+01  -2.4413457e+01   3.0000000e+02  -3.2542774e+00   1.0875215e+00  -2.7357714e+00
   2.5952508e+01  -2.4287744e+01   3.0000000e+02  -3.0944025e+00   9.5644813e-01  -2.9970752e+00
   2.5916835e+01  -2.4163224e+01   3.0000000e+02  -2.9229157e+00   8.0949247e-01  -3.2494577e+00
   2.5875813e+01  -2.4040093e+01   3.0000000e+02  -2.7396518e+00   6.4571818e-01  -3.4901573e+00
   2.5829521e+01  -2.3918543e+01   3.0000000e+02  -2.5448317e+00   4.6458854e-01  -3.7160216e+00
   2.5778045e+01  -2.3798764e+01   3.0000000e+02  -2.3391687e+00   2.6602651e-01  -3.9236626e+00
   2.5721479e+01  -2.3680941e+01   3.0000000e+02  -2.1239114e+00   5.0438765e-02  -4.1096527e+00
   2.5659924e+01  -2.3565257e+01   3.0000000e+02  -1.9008238e+00  -1.8128437e-01  -4.2707235e+00
   2.5593487e+01  -2.3451890e+01   3.0000000e+02  -1.6720994e+00  -4.2780620e-01  -4.4039478e+00
   2.5522283e+01  -2.3341017e+01   3.0000000e+02  -1.4402494e+00  -6.8738835e-01  -4.5068701e+00
   2.5446433e+01  -2.3232808e+01   3.0000000e+02  -1.2079580e+00  -9.5796831e-01  -4.5775950e+00
   2.5366063e+01  -2.3127428e+01   3.0000000e+02  -9.7795882e-01  -1.2372299e+00  -4.6148192e+00
   2.5281307e+01  -2.3025039e+01   3.0000000e+02  -7.5294088e-01  -1.5226706e+00  -4.6178287e+00
   2.5192303e+01  -2.2925798e+01   3.0000000e+02  -5.3547136e-01  -1.8116842e+00  -4.5864796e+00
   2.5099196e+01  -2.2829857e+01   3.0000000e+02  -3.2795948e-01  -2.1016344e+00  -4.5211687e+00
   2.5002135e+01  -2.2737362e+01   3.0000000e+02  -1.3262902e-01  -2.3899406e+00  -4.4228050e+00
   2.4901275e+01  -2.2648453e+01   3.0000000e+02   4.8493879e-02  -2.6741608e+00  -4.2927817e+00
   2.4796777e+01  -2.2563265e+01   3.0000000e+02   2.1360058e-01  -2.9520788e+00  -4.1329448e+00
   2.4688803e+01  -2.2481928e+01   3.0000000e+02   3.6113840e-01  -3.2218018e+00  -3.9455399e+00
   2.4577524e+01  -2.2404565e+01   3.0000000e+02   4.8984536e-01  -3.4818326e+00  -3.7331442e+00
   2.4463110e+01  -2.2331292e+01   3.0000000e+02   5.9881644e-01  -3.7311490e+00  -3.4985502e+00
   2.4345741e+01  -2.2262222e+01   3.0000000e+02   6.8754987e-01  -3.9692185e+00  -3.2446464e+00
   2.4225595e+01  -2.2197457e+01   3.0000000e+02   7.5600979e-01  -4.1960203e+00  -2.9742311e+00
   2.4102858e+01  -2.2137095e+01   3.0000000e+02   8.0465392e-01  -4.4119727e+00  -2.6898624e+00
   2.3977715e+01  -2.2081227e+01   3.0000000e+02   8.3445298e-01  -4.6178499e+00  -2.3936791e+00
   2.3850358e+01  -2.2029938e+01   3.0000000e+02   8.4687115e-01  -4.8146294e+00  -2.0872846e+00
   2.3720978e+01  -2.1983304e+01   3.0000000e+02   8.4382492e-01  -5.0033348e+00  -1.7716494e+00
   2.3589772e+01  -2.1941395e+01   3.0000000e+02   8.2761436e-01  -5.1848449e+00  -1.4471104e+00
   2.3456937e+01  -2.1904275e+01   3.0000000e+02   8.0084003e-01  -5.3597339e+00  -1.1134070e+00
   2.3322672e+01  -2.1871998e+01   3.0000000e+02   7.6630113e-01  -5.5281283e+00  -7.6979165e-01
   2.3187180e+01  -2.1844614e+01   3.0000000e+02   7.2690440e-01  -5.6896067e+00  -4.1519610e-01
   2.3050662e+01  -2.1822163e+01   3.0000000e+02   6.8556321e-01  -5.8431587e+00  -4.8401345e-02
   2.2913322e+01  -2.1804679e+01   3.0000000e+02   6.4511937e-01  -5.9871808e+00   3.3174546e-01
   2.2775366e+01  -2.1792188e+01   3.0000000e+02   6.0827137e-01  -6.1195274e+00   7.2613307e-01
   2.2637000e+01  -2.1784709e+01   3.0000000e+02   5.7752229e-01  -6.2376049e+00   1.1352043e+00
   2.2498430e+01  -2.1782252e+01   3.0000000e+02   5.5513905e-01  -6.3384980e+00   1.5587941e+00
   2.2359861e+01  -2.1784823e+01   3.0000000e+02   5.4313976e-01  -6.4191276e+00   1.9960024e+00
   2.2221502e+01  -2.1792416e+01   3.0000000e+02   5.4327062e-01  -6.4764262e+00   2.4450886e+00
   2.2083558e+01  -2.1805020e+01   3.0000000e+02   5.5701955e-01  -6.5075398e+00   2.9034521e+00
   2.1946235e+01  -2.1822617e+01   3.0000000e+02   5.8562122e-01  -6.5100247e+00   3.3676262e+00
   2.1809738e+01  -2.1845180e+01   3.0000000e+02   6.3006263e-01  -6.4820431e+00   3.8333494e+00
   2.1674271e+01  -2.1872676e+01   3.0000000e+02   6.9109927e-01  -6.4225340e+00   4.2956870e+00
   2.1540036e+01  -2.1905063e+01   3.0000000e+02   7.6925388e-01  -6.3313450e+00   4.7492076e+00
   2.1407236e+01  -2.1942292e+01   3.0000000e+02   8.6482129e-01  -6.2093124e+00   5.1881849e+00
   2.1276069e+01  -2.1984309e+01   3.0000000e+02   9.7786775e-01  -6.0582678e+00   5.6068527e+00
   2.1146733e+01  -2.2031049e+01   3.0000000e+02   1.1082031e+00  -5.8809844e+00   5.9996250e+00
   2.1019424e+01  -2.2082443e+01   3.0000000e+02   1.2553822e+00  -5.6810530e+00   6.3613183e+00
   2.0894334e+01  -2.2138413e+01   3.0000000e+02   1.4186712e+00  -5.4627043e+00   6.6873387e+00
   2.0771653e+01  -2.2198876e+01   3.0000000e+02   1.5970389e+00  -5.2306046e+00   6.9738029e+00
   2.0651568e+01  -2.2263739e+01   3.0000000e+02   1.7891252e+00  -4.9896366e+00   7.2176220e+00
   2.0534263e+01  -2.2332907e+01   3.0000000e+02   1.9932542e+00  -4.7446915e+00   7.4165225e+00
   2.0419919e+01  -2.2406273e+01   3.0000000e+02   2.2074038e+00  -4.5004848e+00   7.5690413e+00
   2.0308713e+01  -2.2483727e+01   3.0000000e+02   2.4292437e+00  -4.2614061e+00   7.6744792e+00
   2.0200816e+01  -2.2565153e+01   3.0000000e+02   2.6561511e+00  -4.0314032e+00   7.7328478e+00
   2.0096398e+01  -2.2650427e+01   3.0000000e+02   2.8852453e+00  -3.8139181e+00   7.7448004e+00
   1.9995623e+01  -2.2739418e+01   3.0000000e+02   3.1134439e+00  -3.6118323e+00   7.7115785e+00
   1.9898650e+01  -2.2831994e+01   3.0000000e+02   3.3375482e+00  -3.4274518e+00   7.6349365e+00
   1.9805634e+01  -2.2928011e+01   3.0000000e+02   3.5542908e+00  -3.2625082e+00   7.5171050e+00
   1.9716725e+01  -2.3027325e+01   3.0000000e+02   3.7604552e+00  -3.1181772e+00   7.3607073e+00
   1.9632067e+01  -2.3129783e+01   3.0000000e+02   3.9529412e+00  -2.9951032e+00   7.1687158e+00
   1.9551798e+01  -2.3235229e+01   3.0000000e+02   4.1288657e+00  -2.8934433e+00   6.9443658e+00
   1.9476052e+01  -2.3343501e+01   3.0000000e+02   4.2856339e+00  -2.8129216e+00   6.6910797e+00
   1.9404954e+01  -2.3454432e+01   3.0000000e+02   4.4209984e+00  -2.7528773e+00   6.4123830e+00
   1.9338627e+01  -2.3567853e+01   3.0000000e+02   4.5331074e+00  -2.7123462e+00   6.1117970e+00
   1.9277184e+01  -2.3683587e+01   3.0000000e+02   4.6205029e+00  -2.6901036e+00   5.7927820e+00
   1.9220732e+01  -2.3801457e+01   3.0000000e+02   4.6821228e+00  -2.6847424e+00   5.4586335e+00
   1.9169372e+01  -2.3921279e+01   3.0000000e+02   4.7172575e+00  -2.6947227e+00   5.1124512e+00
   1.9123198e+01  -2.4042867e+01   3.0000000e+02   4.7255056e+00  -2.7184227e+00   4.7570942e+00
   1.9082297e+01  -2.4166031e+01   3.0000000e+02   4.7067159e+00  -2.7541748e+00   4.3951856e+00
   1.9046746e+01  -2.4290580e+01   3.0000000e+02   4.6609346e+00  -2.8002934e+00   4.0291320e+00
   1.9016617e+01  -2.4416318e+01   3.0000000e+02   4.5883745e+00  -2.8551037e+00   3.6611733e+00
   1.8991974e+01  -2.4543048e+01   3.0000000e+02   4.4893998e+00  -2.9169584e+00   3.2934288e+00
   1.8972871e+01  -2.4670569e+01   3.0000000e+02   4.3645399e+00  -2.9842477e+00   2.9279641e+00
   1.8959356e+01  -2.4798682e+01   3.0000000e+02   4.2145243e+00  -3.0554273e+00   2.5668031e+00
   1.8951466e+01  -2.4927181e+01   3.0000000e+02   4.0403381e+00  -3.1290172e+00   2.2119788e+00
   1.8949233e+01  -2.5055864e+01   3.0000000e+02   3.8432678e+00  -3.2036348e+00   1.8654699e+00
   1.8952678e+01  -2.5184526e+01   3.0000000e+02   3.6249459e+00  -3.2779904e+00   1.5291836e+00
   1.8961812e+01  -2.5312959e+01   3.0000000e+02   3.3873717e+00  -3.3508967e+00   1.2048734e+00
   1.8976640e+01  -2.5440959e+01   3.0000000e+02   3.1328827e+00  -3.4212808e+00   8.9401613e-01
   1.8997156e+01  -2.5568319e+01   3.0000000e+02   2.8641083e+00  -3.4881640e+00   5.9773836e-01
   1.9023345e+01  -2.5694833e+01   3.0000000e+02   2.5838692e+00  -3.5506507e+00   3.1671198e-01
   1.9055182e+01  -2.5820297e+01   3.0000000e+02   2.2950473e+00  -3.6079003e+00   5.1092210e-02
   1.9092635e+01  -2.5944507e+01   3.0000000e+02   2.0004430e+00  -3.6590966e+00  -1.9950880e-01
   1.9135659e+01  -2.6067259e+01   3.0000000e+02   1.7026251e+00  -3.7033995e+00  -4.3597856e-01
   1.9184203e+01  -2.6188354e+01   3.0000000e+02   1.4037829e+00  -3.7399162e+00  -6.5964309e-01
   1.9238205e+01  -2.6307592e+01   3.0000000e+02   1.1056403e+00  -3.7676616e+00  -8.7211238e-01
   1.9297592e+01  -2.6424776e+01   3.0000000e+02   8.0939723e-01  -3.7855406e+00  -1.0751107e+00
   1.9362282e+01  -2.6539714e+01   3.0000000e+02   5.1573558e-01  -3.7923520e+00  -1.2702895e+00
   1.9432187e+01  -2.6652214e+01   3.0000000e+02   2.2490173e-01  -3.7868177e+00  -1.4590481e+00
   1.9507204e+01  -2.6762089e+01   3.0000000e+02  -6.3173467e-02  -3.7676215e+00  -1.6423567e+00
   1.9587223e+01  -2.6869156e+01   3.0000000e+02  -3.4871194e-01  -3.7334834e+00  -1.8206757e+00
   1.9672127e+01  -2.6973236e+01   3.0000000e+02  -6.3191094e-01  -3.6832331e+00  -1.9939218e+00
   1.9761785e+01  -2.7074154e+01   3.0000000e+02  -9.1277044e-01  -3.6158767e+00  -2.1614837e+00
   1.9856060e+01  -2.7171739e+01   3.0000000e+02  -1.1909658e+00  -3.5306539e+00  -2.3223399e+00
   1.9954807e+01  -2.7265827e+01   3.0000000e+02  -1.4657714e+00  -3.4270566e+00  -2.4751852e+00
   2.0057868e+01  -2.7356258e+01   3.0000000e+02  -1.7360286e+00  -3.3048227e+00  -2.6185699e+00
   2.0165081e+01  -2.7442878e+01   3.0000000e+02  -2.0001971e+00  -3.1638918e+00  -2.7510535e+00
   2.0686306e+01  -2.7925669e+01   3.0000000e+02  -3.2596453e+00  -2.1776218e+00  -2.8483102e+00
   2.0814779e+01  -2.7986786e+01   3.0000000e+02  -3.4418945e+00  -1.9465478e+00  -2.8911151e+00
   2.0945959e+01  -2.8043369e+01   3.0000000e+02  -3.6058221e+00  -1.6983079e+00  -2.9167541e+00
   2.1079638e+01  -2.8095326e+01   3.0000000e+02  -3.7505454e+00  -1.4331069e+00  -2.9235826e+00
   2.1215606e+01  -2.8142574e+01   3.0000000e+02  -3.8755525e+00  -1.1514795e+00  -2.9096186e+00
   2.1353647e+01  -2.8185037e+01   3.0000000e+02  -3.9807075e+00  -8.5442831e-01  -2.8725911e+00
   2.1493540e+01  -2.8222644e+01   3.0000000e+02  -4.0662563e+00  -5.4354294e-01  -2.8100492e+00
   2.1635060e+01  -2.8255337e+01   3.0000000e+02  -4.1328383e+00  -2.2109246e-01  -2.7194905e+00
   2.1777982e+01  -2.8283060e+01   3.0000000e+02  -4.1814730e+00   1.0991102e-01  -2.5985815e+00
   2.1922073e+01  -2.8305770e+01   3.0000000e+02  -4.2135496e+00   4.4567375e-01  -2.4453608e+00
   2.2067101e+01  -2.8323429e+01   3.0000000e+02  -4.2307891e+00   7.8167186e-01  -2.2585161e+00
   2.2212832e+01  -2.8336008e+01   3.0000000e+02  -4.2351919e+00   1.1127540e+00  -2.0376369e+00
   2.2359029e+01  -2.8343488e+01   3.0000000e+02  -4.2289637e+00   1.4333310e+00  -1.7834538e+00
   2.2505454e+01  -2.8345856e+01   3.0000000e+02  -4.2144254e+00   1.7376540e+00  -1.4980253e+00
   2.2651871e+01  -2.8343107e+01   3.0000000e+02  -4.1939121e+00   2.0201583e+00  -1.1848043e+00
   2.2798041e+01  -2.8335247e+01   3.0000000e+02  -4.1696696e+00   2.2758162e+00  -8.4859267e-01
   2.2943728e+01  -2.8322288e+01   3.0000000e+02  -4.1437565e+00   2.5004953e+00  -4.9535673e-01
   2.3088695e+01  -2.8304252e+01   3.0000000e+02  -4.1179623e+00   2.6912313e+00  -1.3192166e-01
   2.3232707e+01  -2.8281167e+01   3.0000000e+02  -4.0937506e+00   2.8464090e+00   2.3441823e-01
   2.3375531e+01  -2.8253072e+01   3.0000000e+02  -4.0722266e+00   2.9658105e+00   5.9634118e-01
   2.3516939e+01  -2.8220012e+01   3.0000000e+02  -4.0541415e+00   3.0505403e+00   9.4690741e-01
   2.3656701e+01  -2.8182041e+01   3.0000000e+02  -4.0399226e+00   3.1028346e+00   1.2798930e+00
   2.3794595e+01  -2.8139219e+01   3.0000000e+02  -4.0297259e+00   3.1258077e+00   1.5900629e+00
   2.3930400e+01  -2.8091618e+01   3.0000000e+02  -4.0234980e+00   3.1231495e+00   1.8733012e+00
   2.4063901e+01  -2.8039313e+01   3.0000000e+02  -4.0210539e+00   3.0988375e+00   2.1266289e+00
   2.4194885e+01  -2.7982389e+01   3.0000000e+02  -4.0221355e+00   3.0568760e+00   2.3481421e+00
   2.4323149e+01  -2.7920938e+01   3.0000000e+02  -4.0264624e+00   3.0010902e+00   2.5368909e+00
   2.4448489e+01  -2.7855059e+01   3.0000000e+02  -4.0337735e+00   2.9349924e+00   2.6926760e+00
   2.4570713e+01  -2.7784858e+01   3.0000000e+02  -4.0438386e+00   2.8616948e+00   2.8159010e+00
   2.4689631e+01  -2.7710446e+01   3.0000000e+02  -4.0564705e+00   2.7838902e+00   2.9073701e+00
   2.4805061e+01  -2.7631944e+01   3.0000000e+02  -4.0715092e+00   2.7038533e+00   2.9681723e+00
   2.4916827e+01  -2.7549475e+01   3.0000000e+02  -4.0888191e+00   2.6234762e+00   2.9995439e+00
   2.5024761e+01  -2.7463172e+01   3.0000000e+02  -4.1082627e+00   2.5442970e+00   3.0028139e+00
   2.5128703e+01  -2.7373171e+01   3.0000000e+02  -4.1296905e+00   2.4675365e+00   2.9793296e+00
   2.5228498e+01  -2.7279614e+01   3.0000000e+02  -4.1529193e+00   2.3941252e+00   2.9304222e+00
   2.5324001e+01  -2.7182650e+01   3.0000000e+02  -4.1777066e+00   2.3247118e+00   2.8573931e+00
   2.5415073e+01  -2.7082429e+01   3.0000000e+02  -4.2037287e+00   2.2596860e+00   2.7614718e+00
   2.5501585e+01  -2.6979111e+01   3.0000000e+02  -4.2305384e+00   2.1991817e+00   2.6438364e+00
   2.5583414e+01  -2.6872856e+01   3.0000000e+02  -4.2575373e+00   2.1431110e+00   2.5055814e+00
   2.5660449e+01  -2.6763829e+01   3.0000000e+02  -4.2839377e+00   2.0911855e+00   2.3477585e+00
   2.5732583e+01  -2.6652200e+01   3.0000000e+02  -4.3087466e+00   2.0429685e+00   2.1713991e+00
   2.5799720e+01  -2.6538143e+01   3.0000000e+02  -4.3307683e+00   1.9979140e+00   1.9775742e+00
   2.5861772e+01  -2.6421832e+01   3.0000000e+02  -4.3486401e+00   1.9554179e+00   1.7674381e+00
   2.5918660e+01  -2.6303447e+01   3.0000000e+02  -4.3608953e+00   1.9148539e+00   1.5422991e+00
   2.5970313e+01  -2.6183169e+01   3.0000000e+02  -4.3660553e+00   1.8756034e+00   1.3036400e+00
   2.6016669e+01  -2.6061182e+01   3.0000000e+02  -4.3627329e+00   1.8370673e+00   1.0531306e+00
   2.6057675e+01  -2.5937671e+01   3.0000000e+02  -4.3497344e+00   1.7986653e+00   7.9259465e-01
   2.6093286e+01  -2.5812825e+01   3.0000000e+02  -4.3261443e+00   1.7598242e+00   5.2395641e-01
   2.6123465e+01  -2.5686832e+01   3.0000000e+02  -4.2913778e+00   1.7199572e+00   2.4914442e-01
   2.6148185e+01  -2.5559882e+01   3.0000000e+02  -4.2451964e+00   1.6784350e+00  -2.9991012e-02
   2.6167426e+01  -2.5432165e+01   3.0000000e+02  -4.1876802e+00   1.6345595e+00  -3.1177655e-01
   2.6181176e+01  -2.5303873e+01   3.0000000e+02  -4.1191641e+00   1.5875343e+00  -5.9478030e-01
   2.6189434e+01  -2.5175198e+01   3.0000000e+02  -4.0401424e+00   1.5364373e+00  -8.7785206e-01
   2.6192204e+01  -2.5046330e+01   3.0000000e+02  -3.9511507e+00   1.4802040e+00  -1.1601345e+00
   2.6189500e+01  -2.4917461e+01   3.0000000e+02  -3.8526513e+00   1.4176175e+00  -1.4409981e+00
   2.6181342e+01  -2.4788782e+01   3.0000000e+02  -3.7449258e+00   1.3473153e+00  -1.7199572e+00
   2.6167759e+01  -2.4660481e+01   3.0000000e+02  -3.6280042e+00   1.2678113e+00  -1.9965345e+00
   2.6148789e+01  -2.4532749e+01   3.0000000e+02  -3.5016499e+00   1.1775457e+00  -2.2700901e+00
   2.6124475e+01  -2.4405771e+01   3.0000000e+02  -3.3653884e+00   1.0749480e+00  -2.5396864e+00
   2.6094868e+01  -2.4279733e+01   3.0000000e+02  -3.2186126e+00   9.5852611e-01  -2.8039393e+00
   2.6060027e+01  -2.4154819e+01   3.0000000e+02  -3.0607243e+00   8.2696102e-01  -3.0609470e+00
   2.6020018e+01  -2.4031210e+01   3.0000000e+02  -2.8912995e+00   6.7920381e-01  -3.3082863e+00
   2.5974912e+01  -2.3909085e+01   3.0000000e+02  -2.7102479e+00   5.1456221e-01  -3.5430838e+00
   2.5924790e+01  -2.3788621e+01   3.0000000e+02  -2.5179435e+00   3.3276784e-01  -3.7621468e+00
   2.5869736e+01  -2.3669991e+01   3.0000000e+02  -2.3152825e+00   1.3400795e-01  -3.9621573e+00
   2.5809843e+01  -2.3553365e+01   3.0000000e+02  -2.1036920e+00  -8.1065322e-02  -4.1398597e+00
   2.5745208e+01  -2.3438912e+01   3.0000000e+02  -1.8850640e+00  -3.1135685e-01  -4.2922467e+00
   2.5675937e+01  -2.3326794e+01   3.0000000e+02  -1.6616481e+00  -5.5537803e-01  -4.4167034e+00
   2.5602138e+01  -2.3217172e+01   3.0000000e+02  -1.4359196e+00  -8.1130073e-01  -4.5111005e+00
   2.5523926e+01  -2.3110201e+01   3.0000000e+02  -1.2104562e+00  -1.0770241e+00  -4.5738387e+00
   2.5441424e+01  -2.3006035e+01   3.0000000e+02  -9.8784157e-01  -1.3502281e+00  -4.6038543e+00
   2.5354757e+01  -2.2904819e+01   3.0000000e+02  -7.7057685e-01  -1.6284568e+00  -4.6006106e+00
   2.5264056e+01  -2.2806699e+01   3.0000000e+02  -5.6105443e-01  -1.9091614e+00  -4.5640757e+00
   2.5169457e+01  -2.2711812e+01   3.0000000e+02  -3.6152882e-01  -2.1897856e+00  -4.4947080e+00
   2.5071102e+01  -2.2620292e+01   3.0000000e+02  -1.7411366e-01  -2.4678292e+00  -4.3934483e+00
   2.4969133e+01  -2.2532269e+01   3.0000000e+02  -7.6042366e-04  -2.7409418e+00  -4.2617094e+00
   2.4863703e+01  -2.2447865e+01   3.0000000e+02   1.5675077e-01  -3.0070024e+00  -4.1013635e+00
   2.4754962e+01  -2.2367199e+01   3.0000000e+02   2.9686595e-01  -3.2642246e+00  -3.9146970e+00
   2.4643070e+01  -2.2290385e+01   3.0000000e+02   4.1829504e-01  -3.5112276e+00  -3.7043524e+00
   2.4528186e+01  -2.2217530e+01   3.0000000e+02   5.2008746e-01  -3.7471236e+00  -3.4732086e+00
   2.4410476e+01  -2.2148736e+01   3.0000000e+02   6.0168678e-01  -3.9715452e+00  -3.2242487e+00
   2.4290106e+01  -2.2084099e+01   3.0000000e+02   6.6299289e-01  -4.1846564e+00  -2.9603780e+00
   2.4167247e+01  -2.2023709e+01   3.0000000e+02   7.0439519e-01  -4.3870977e+00  -2.6842458e+00
   2.4042073e+01  -2.1967650e+01   3.0000000e+02   7.2678798e-01  -4.5798900e+00  -2.3980668e+00
   2.3914760e+01  -2.1916000e+01   3.0000000e+02   7.3155570e-01  -4.7642919e+00  -2.1034729e+00
   2.3785486e+01  -2.1868832e+01   3.0000000e+02   7.2053043e-01  -4.9416237e+00  -1.8014193e+00
   2.3654432e+01  -2.1826210e+01   3.0000000e+02   6.9592067e-01  -5.1130775e+00  -1.4921536e+00
   2.3521781e+01  -2.1788195e+01   3.0000000e+02   6.6023234e-01  -5.2795353e+00  -1.1752588e+00
   2.3387718e+01  -2.1754838e+01   3.0000000e+02   6.1616762e-01  -5.4414158e+00  -8.4975243e-01
   2.3252428e+01  -2.1726186e+01   3.0000000e+02   5.6653558e-01  -5.5985637e+00  -5.1424396e-01
   2.3116098e+01  -2.1702278e+01   3.0000000e+02   5.1415772e-01  -5.7501847e+00  -1.6712868e-01
   2.2978918e+01  -2.1683149e+01   3.0000000e+02   4.6179448e-01  -5.8948359e+00   1.9319748e-01
   2.2841078e+01  -2.1668824e+01   3.0000000e+02   4.1207074e-01  -6.0304672e+00   5.6813644e-01
   2.2702767e+01  -2.1659323e+01   3.0000000e+02   3.6743224e-01  -6.1545064e+00   9.5869101e-01
   2.2564176e+01  -2.1654660e+01   3.0000000e+02   3.3011034e-01  -6.2639767e+00   1.3652826e+00
   2.2425496e+01  -2.1654840e+01   3.0000000e+02   3.0209617e-01  -6.3556486e+00   1.7876130e+00
   2.2286920e+01  -2.1659864e+01   3.0000000e+02   2.8514207e-01  -6.4262156e+00   2.2245524e+00
   2.2148637e+01  -2.1669725e+01   3.0000000e+02   2.8075568e-01  -6.4724879e+00   2.6740982e+00
   2.2010839e+01  -2.1684408e+01   3.0000000e+02   2.9020963e-01  -6.4915900e+00   3.1333415e+00
   2.1873716e+01  -2.1703895e+01   3.0000000e+02   3.1456319e-01  -6.4811630e+00   3.5985279e+00
   2.1737458e+01  -2.1728157e+01   3.0000000e+02   3.5465850e-01  -6.4395454e+00   4.0651482e+00
   2.1602252e+01  -2.1757160e+01   3.0000000e+02   4.1114269e-01  -6.3659255e+00   4.5281016e+00
   2.1468288e+01  -2.1790866e+01   3.0000000e+02   4.8447727e-01  -6.2604504e+00   4.9818709e+00
   2.1335749e+01  -2.1829227e+01   3.0000000e+02   5.7492390e-01  -6.1242647e+00   5.4207803e+00
   2.1204822e+01  -2.1872189e+01   3.0000000e+02   6.8254816e-01  -5.9594979e+00   5.8391952e+00
   2.1075688e+01  -2.1919694e+01   3.0000000e+02   8.0721308e-01  -5.7691670e+00   6.2317813e+00
   2.0948528e+01  -2.1971674e+01   3.0000000e+02   9.4854686e-01  -5.5570349e+00   6.5936795e+00
   2.0823520e+01  -2.2028059e+01   3.0000000e+02   1.1059434e+00  -5.3274186e+00   6.9206661e+00
   2.0700841e+01  -2.2088768e+01   3.0000000e+02   1.2785165e+00  -5.0849808e+00   7.2092452e+00
   2.0580663e+01  -2.2153718e+01   3.0000000e+02   1.4651044e+00  -4.8345118e+00   7.4567019e+00
   2.0463158e+01  -2.2222818e+01   3.0000000e+02   1.6642394e+00  -4.5807457e+00   7.6610897e+00
   2.0348491e+01  -2.2295971e+01   3.0000000e+02   1.8741466e+00  -4.3281834e+00   7.8212087e+00
   2.0236828e+01  -2.2373076e+01   3.0000000e+02   2.0927555e+00  -4.0809849e+00   7.9365291e+00
   2.0128329e+01  -2.2454024e+01   3.0000000e+02   2.3177051e+00  -3.8428662e+00   8.0071411e+00
   2.0023151e+01  -2.2538701e+01   3.0000000e+02   2.5463845e+00  -3.6170522e+00   8.0336798e+00
   1.9921446e+01  -2.2626990e+01   3.0000000e+02   2.7759822e+00  -3.4062460e+00   8.0172629e+00
   1.9823365e+01  -2.2718765e+01   3.0000000e+02   3.0035258e+00  -3.2126304e+00   7.9594412e+00
   1.9729052e+01  -2.2813897e+01   3.0000000e+02   3.2259648e+00  -3.0378649e+00   7.8621508e+00
   1.9638647e+01  -2.2912253e+01   3.0000000e+02   3.4402426e+00  -2.8831125e+00   7.7276649e+00
   1.9552286e+01  -2.3013693e+01   3.0000000e+02   3.6433671e+00  -2.7490665e+00   7.5585556e+00
   1.9470099e+01  -2.3118074e+01   3.0000000e+02   3.8324989e+00  -2.6359847e+00   7.3576370e+00
   1.9392212e+01  -2.3225247e+01   3.0000000e+02   4.0050190e+00  -2.5437351e+00   7.1279138e+00
   1.9318746e+01  -2.3335061e+01   3.0000000e+02   4.1585997e+00  -2.4718455e+00   6.8725062e+00
   1.9249816e+01  -2.3447358e+01   3.0000000e+02   4.2912410e+00  -2.4195508e+00   6.5945957e+00
   1.9185531e+01  -2.3561979e+01   3.0000000e+02   4.4013096e+00  -2.3858522e+00   6.2973355e+00
   1.9125995e+01  -2.3678760e+01   3.0000000e+02   4.4875370e+00  -2.3695688e+00   5.9837948e+00
   1.9071306e+01  -2.3797532e+01   3.0000000e+02   4.5490040e+00  -2.3693827e+00   5.6569027e+00
   1.9021554e+01  -2.3918126e+01   3.0000000e+02   4.5851077e+00  -2.3838807e+00   5.3193935e+00
   1.8976826e+01  -2.4040367e+01   3.0000000e+02   4.5955116e+00  -2.4115919e+00   4.9738009e+00
   1.8937199e+01  -2.4164080e+01   3.0000000e+02   4.5800906e+00  -2.4510040e+00   4.6224506e+00
   1.8902746e+01  -2.4289084e+01   3.0000000e+02   4.5388875e+00  -2.5005899e+00   4.2674987e+00
   1.8873531e+01  -2.4415198e+01   3.0000000e+02   4.4720788e+00  -2.5588188e+00   3.9109628e+00
   1.8849613e+01  -2.4542239e+01   3.0000000e+02   4.3799684e+00  -2.6241770e+00   3.5547752e+00
   1.8831043e+01  -2.4670020e+01   3.0000000e+02   4.2630032e+00  -2.6951738e+00   3.2008446e+00
   1.8817863e+01  -2.4798355e+01   3.0000000e+02   4.1218086e+00  -2.7703585e+00   2.8510785e+00
   1.8810111e+01  -2.4927055e+01   3.0000000e+02   3.9572484e+00  -2.8483429e+00   2.5073993e+00
   1.8807813e+01  -2.5055931e+01   3.0000000e+02   3.7704734e+00  -2.9278011e+00   2.1717318e+00
   1.8810992e+01  -2.5184791e+01   3.0000000e+02   3.5629771e+00  -3.0074998e+00   1.8459437e+00
   1.8819658e+01  -2.5313444e+01   3.0000000e+02   3.3366078e+00  -3.0862900e+00   1.5317771e+00
   1.8833818e+01  -2.5441700e+01   3.0000000e+02   3.0935626e+00  -3.1631310e+00   1.2307319e+00
   1.8853467e+01  -2.5569366e+01   3.0000000e+02   2.8363430e+00  -3.2370695e+00   9.4398987e-01
   1.8878595e+01  -2.5696251e+01   3.0000000e+02   2.5676618e+00  -3.3072450e+00   6.7229283e-01
   1.8909179e+01  -2.5822166e+01   3.0000000e+02   2.2903211e+00  -3.3728561e+00   4.1589061e-01
   1.8945193e+01  -2.5946919e+01   3.0000000e+02   2.0070818e+00  -3.4331507e+00   1.7448971e-01
   1.8986599e+01  -2.6070322e+01   3.0000000e+02   1.7204963e+00  -3.4873772e+00  -5.2722956e-02
   1.9033352e+01  -2.6192188e+01   3.0000000e+02   1.4327747e+00  -3.5347563e+00  -2.6702096e-01
   1.9085398e+01  -2.6312332e+01   3.0000000e+02   1.1456691e+00  -3.5744435e+00  -4.7001713e-01
   1.9142673e+01  -2.6430569e+01   3.0000000e+02   8.6041144e-01  -3.6055025e+00  -6.6350074e-01
   1.9205107e+01  -2.6546718e+01   3.0000000e+02   5.7769216e-01  -3.6269000e+00  -8.4926550e-01
   1.9272619e+01  -2.6660601e+01   3.0000000e+02   2.9771526e-01  -3.6375077e+00  -1.0289071e+00
   1.9345121e+01  -2.6772041e+01   3.0000000e+02   2.0309046e-02  -3.6361403e+00  -1.2036667e+00
   1.9422517e+01  -2.6880867e+01   3.0000000e+02  -2.5493151e-01  -3.6216024e+00  -1.3743040e+00
   1.9504699e+01  -2.6986910e+01   3.0000000e+02  -5.2845544e-01  -3.5927532e+00  -1.5410228e+00
   1.9591555e+01  -2.7090003e+01   3.0000000e+02  -8.0058238e-01  -3.5485831e+00  -1.7034978e+00
   1.9682962e+01  -2.7189986e+01   3.0000000e+02  -1.0713506e+00  -3.4882648e+00  -1.8609233e+00
   1.9778789e+01  -2.7286702e+01   3.0000000e+02  -1.3403966e+00  -3.4111991e+00  -2.0121448e+00
   1.9878898e+01  -2.7379999e+01   3.0000000e+02  -1.6069023e+00  -3.3170239e+00  -2.1558123e+00
   1.9983142e+01  -2.7469729e+01   3.0000000e+02  -1.8695943e+00  -3.2055915e+00  -2.2905299e+00
   2.0091368e+01  -2.7555751e+01   3.0000000e+02  -2.1268118e+00  -3.0769116e+00  -2.4149872e+00
   2.0203413e+01  -2.7637929e+01   3.0000000e+02  -2.3766023e+00  -2.9310824e+00  -2.5280316e+00
   2.0319108e+01  -2.7716131e+01   3.0000000e+02  -2.6168528e+00  -2.7682157e+00  -2.6286990e+00
   2.0438279e+01  -2.7790233e+01   3.0000000e+02  -2.8454326e+00  -2.5883705e+00  -2.7161656e+00
   2.0560741e+01  -2.7860116e+01   3.0000000e+02  -3.0603061e+00  -2.3915333e+00  -2.7896509e+00
   2.1165322e+01  -2.8262981e+01   3.0000000e+02  -3.9623823e+00  -1.1771888e+00  -2.5549766e+00
   2.1302850e+01  -2.8305387e+01   3.0000000e+02  -4.0596124e+00  -8.9955260e-01  -2.5256726e+00
   2.1442164e+01  -2.8343157e+01   3.0000000e+02  -4.1371214e+00  -6.0731609e-01  -2.4736736e+00
   2.1583055e+01  -2.8376234e+01   3.0000000e+02  -4.1953695e+00  -3.0229032e-01  -2.3963462e+00
   2.1725317e+01  -2.8404569e+01   3.0000000e+02  -4.2351796e+00   1.2996678e-02  -2.2910843e+00
   2.1868736e+01  -2.8428119e+01   3.0000000e+02  -4.2577324e+00   3.3522824e-01  -2.1555267e+00
   2.2013100e+01  -2.8446848e+01   3.0000000e+02  -4.2645561e+00   6.6032208e-01  -1.9878014e+00
   2.2158193e+01  -2.8460729e+01   3.0000000e+02  -4.2574939e+00   9.8348465e-01  -1.7867887e+00
   2.2303797e+01  -2.8469741e+01   3.0000000e+02  -4.2386516e+00   1.2993638e+00  -1.5523903e+00
   2.2449696e+01  -2.8473871e+01   3.0000000e+02  -4.2103263e+00   1.6022910e+00  -1.2857356e+00
   2.2595669e+01  -2.8473111e+01   3.0000000e+02  -4.1749198e+00   1.8865738e+00  -9.8933811e-01
   2.2741500e+01  -2.8467463e+01   3.0000000e+02  -4.1348366e+00   2.1468696e+00  -6.6708871e-01
   2.2886969e+01  -2.8456936e+01   3.0000000e+02  -4.0923830e+00   2.3785271e+00  -3.2417350e-01
   2.3031858e+01  -2.8441545e+01   3.0000000e+02  -4.0496692e+00   2.5779165e+00   3.3172884e-02
   2.3175951e+01  -2.8421314e+01   3.0000000e+02  -4.0085259e+00   2.7426614e+00   3.9801787e-01
   2.3319033e+01  -2.8396273e+01   3.0000000e+02  -3.9704481e+00   2.8717582e+00   7.6312718e-01
   2.3460892e+01  -2.8366459e+01   3.0000000e+02  -3.9365652e+00   2.9655728e+00   1.1213922e+00
   2.3601315e+01  -2.8331918e+01   3.0000000e+02  -3.9076426e+00   3.0257151e+00   1.4662056e+00
   2.3740095e+01  -2.8292700e+01   3.0000000e+02  -3.8841143e+00   3.0548313e+00   1.7917777e+00
   2.3877028e+01  -2.8248866e+01   3.0000000e+02  -3.8661287e+00   3.0563245e+00   2.0933488e+00
   2.4011913e+01  -2.8200479e+01   3.0000000e+02  -3.8536243e+00   3.0340672e+00   2.3672635e+00
   2.4144550e+01  -2.8147613e+01   3.0000000e+02  -3.8463884e+00   2.9921204e+00   2.6109793e+00
   2.4274749e+01  -2.8090347e+01   3.0000000e+02  -3.8441226e+00   2.9344944e+00   2.8229883e+00
   2.4402319e+01  -2.8028764e+01   3.0000000e+02  -3.8465011e+00   2.8649758e+00   3.0026382e+00
   2.4527078e+01  -2.7962957e+01   3.0000000e+02  -3.8531933e+00   2.7869979e+00   3.1499993e+00
   2.4648847e+01  -2.7893024e+01   3.0000000e+02  -3.8638934e+00   2.7035872e+00   3.2656588e+00
   2.4767452e+01  -2.7819066e+01   3.0000000e+02  -3.8783296e+00   2.6173498e+00   3.3505608e+00
   2.4882727e+01  -2.7741195e+01   3.0000000e+02  -3.8962493e+00   2.5304778e+00   3.4058975e+00
   2.4994510e+01  -2.7659523e+01   3.0000000e+02  -3.9174280e+00   2.4447963e+00   3.4329729e+00
   2.5102647e+01  -2.7574171e+01   3.0000000e+02  -3.9416450e+00   2.3617887e+00   3.4331610e+00
   2.5206988e+01  -2.7485263e+01   3.0000000e+02  -3.9686835e+00   2.2826373e+00   3.4078352e+00
   2.5307391e+01  -2.7392930e+01   3.0000000e+02  -3.9983105e+00   2.2082365e+00   3.3583525e+00
   2.5403722e+01  -2.7297305e+01   3.0000000e+02  -4.0302671e+00   2.1392077e+00   3.2860159e+00
   2.5495852e+01  -2.7198528e+01   3.0000000e+02  -4.0642423e+00   2.0759065e+00   3.1920587e+00
   2.5583660e+01  -2.7096740e+01   3.0000000e+02  -4.0998459e+00   2.0184301e+00   3.0776172e+00
   2.5667033e+01  -2.6992090e+01   3.0000000e+02  -4.1365635e+00   1.9666290e+00   2.9437383e+00
   2.5745863e+01  -2.6884727e+01   3.0000000e+02  -4.1737236e+00   1.9201442e+00   2.7913601e+00
   2.5820052e+01  -2.6774804e+01   3.0000000e+02  -4.2104557e+00   1.8784374e+00   2.6213552e+00
   2.5889508e+01  -2.6662480e+01   3.0000000e+02  -4.2456743e+00   1.8408456e+00   2.4345762e+00
   2.5954147e+01  -2.6547913e+01   3.0000000e+02  -4.2780903e+00   1.8066350e+00   2.2319047e+00
   2.6013892e+01  -2.6431267e+01   3.0000000e+02  -4.3062501e+00   1.7750478e+00   2.0143357e+00
   2.6068675e+01  -2.6312706e+01   3.0000000e+02  -4.3286117e+00   1.7453419e+00   1.7830254e+00
   2.6118434e+01  -2.6192397e+01   3.0000000e+02  -4.3436429e+00   1.7168192e+00   1.5393319e+00
   2.6163116e+01  -2.6070510e+01   3.0000000e+02  -4.3499304e+00   1.6888329e+00   1.2848238e+00
   2.6202673e+01  -2.5947215e+01   3.0000000e+02  -4.3462851e+00   1.6607900e+00   1.0212353e+00
   2.6237069e+01  -2.5822683e+01   3.0000000e+02  -4.3318243e+00   1.6321294e+00   7.5041476e-01
   2.6266271e+01  -2.5697088e+01   3.0000000e+02  -4.3060237e+00   1.6023090e+00   4.7423023e-01
   2.6290256e+01  -2.5570605e+01   3.0000000e+02  -4.2687292e+00   1.5707715e+00   1.9447603e-01
   2.6309007e+01  -2.5443407e+01   3.0000000e+02  -4.2201264e+00   1.5369177e+00  -8.7234030e-02
   2.6322517e+01  -2.5315670e+01   3.0000000e+02  -4.1606754e+00   1.5000721e+00  -3.6952636e-01
   2.6330782e+01  -2.5187569e+01   3.0000000e+02  -4.0910112e+00   1.4594585e+00  -6.5133576e-01
   2.6333808e+01  -2.5059280e+01   3.0000000e+02  -4.0118270e+00   1.4141699e+00  -9.3190190e-01
   2.6331608e+01  -2.4930976e+01   3.0000000e+02  -3.9237471e+00   1.3631527e+00  -1.2107478e+00
   2.6324201e+01  -2.4802834e+01   3.0000000e+02  -3.8272159e+00   1.3052057e+00  -1.4875847e+00
   2.6311613e+01  -2.4675025e+01   3.0000000e+02  -3.7224057e+00   1.2389871e+00  -1.7622091e+00
   2.6293876e+01  -2.4547724e+01   3.0000000e+02  -3.6091822e+00   1.1630529e+00  -2.0343296e+00
   2.6271031e+01  -2.4421101e+01   3.0000000e+02  -3.4871152e+00   1.0759051e+00  -2.3034192e+00
   2.6243123e+01  -2.4295326e+01   3.0000000e+02  -3.3555552e+00   9.7607026e-01  -2.5685650e+00
   2.6210204e+01  -2.4170568e+01   3.0000000e+02  -3.2137624e+00   8.6218672e-01  -2.8283610e+00
   2.6172332e+01  -2.4046993e+01   3.0000000e+02  -3.0610657e+00   7.3309723e-01  -3.0808699e+00
   2.6129572e+01  -2.3924766e+01   3.0000000e+02  -2.8970340e+00   5.8794005e-01  -3.3236485e+00
   2.6081993e+01  -2.3804049e+01   3.0000000e+02  -2.7216185e+00   4.2621909e-01  -3.5538552e+00
   2.6029673e+01  -2.3685003e+01   3.0000000e+02  -2.5352596e+00   2.4785575e-01  -3.7683959e+00
   2.5972691e+01  -2.3567783e+01   3.0000000e+02  -2.3389099e+00   5.3197887e-02  -3.9641231e+00
   2.5911136e+01  -2.3452546e+01   3.0000000e+02  -2.1340256e+00  -1.5697504e-01  -4.1379974e+00
   2.5845100e+01  -2.3339442e+01   3.0000000e+02  -1.9224671e+00  -3.8150030e-01  -4.2872609e+00
   2.5774679e+01  -2.3228620e+01   3.0000000e+02  -1.7063924e+00  -6.1887119e-01  -4.4095387e+00
   2.5699977e+01  -2.3120225e+01   3.0000000e+02  -1.4881371e+00  -8.6729158e-01  -4.5029021e+00
   2.5621100e+01  -2.3014399e+01   3.0000000e+02  -1.2700981e+00  -1.1247338e+00  -4.5658935e+00
   2.5538160e+01  -2.2911279e+01   3.0000000e+02  -1.0546560e+00  -1.3889894e+00  -4.5975203e+00
   2.5451275e+01  -2.2810999e+01   3.0000000e+02  -8.4412765e-01  -1.6577153e+00  -4.5972417e+00
   2.5360563e+01  -2.2713691e+01   3.0000000e+02  -6.4073468e-01  -1.9284896e+00  -4.5649603e+00
   2.5266151e+01  -2.2619479e+01   3.0000000e+02  -4.4660652e-01  -2.1988673e+00  -4.5010226e+00
   2.5168167e+01  -2.2528487e+01   3.0000000e+02  -2.6377162e-01  -2.4664429e+00  -4.4062297e+00
   2.5066744e+01  -2.2440831e+01   3.0000000e+02  -9.4148747e-02  -2.7289348e+00  -4.2818485e+00
   2.4962018e+01  -2.2356625e+01   3.0000000e+02   6.0476375e-02  -2.9842656e+00  -4.1296141e+00
   2.4854130e+01  -2.2275976e+01   3.0000000e+02   1.9849176e-01  -3.2306589e+00  -3.9517091e+00
   2.4743223e+01  -2.2198990e+01   3.0000000e+02   3.1851761e-01  -3.4667269e+00  -3.7507105e+00
   2.4629442e+01  -2.2125764e+01   3.0000000e+02   4.1947292e-01  -3.6915586e+00  -3.5294888e+00
   2.4512939e+01  -2.2056393e+01   3.0000000e+02   5.0063762e-01  -3.9047603e+00  -3.2910860e+00
   2.4393864e+01  -2.1990966e+01   3.0000000e+02   5.6172096e-01  -4.1064911e+00  -3.0385304e+00
   2.4272374e+01  -2.1929566e+01   3.0000000e+02   6.0289728e-01  -4.2974228e+00  -2.7746601e+00
   2.4148626e+01  -2.1872271e+01   3.0000000e+02   6.2483174e-01  -4.4786706e+00  -2.5019229e+00
   2.4022779e+01  -2.1819156e+01   3.0000000e+02   6.2867291e-01  -4.6516628e+00  -2.2222127e+00
   2.3894996e+01  -2.1770288e+01   3.0000000e+02   6.1601465e-01  -4.8179742e+00  -1.9367431e+00
   2.3765441e+01  -2.1725729e+01   3.0000000e+02   5.8883908e-01  -4.9791395e+00  -1.6459806e+00
   2.3634279e+01  -2.1685536e+01   3.0000000e+02   5.4943834e-01  -5.1364614e+00  -1.3496492e+00
   2.3501680e+01  -2.1649760e+01   3.0000000e+02   5.0032515e-01  -5.2908320e+00  -1.0468109e+00
   2.3367810e+01  -2.1618447e+01   3.0000000e+02   4.4414201e-01  -5.4426045e+00  -7.3598116e-01
   2.3232841e+01  -2.1591636e+01   3.0000000e+02   3.8357214e-01  -5.5914881e+00  -4.1532682e-01
   2.3096944e+01  -2.1569362e+01   3.0000000e+02   3.2126492e-01  -5.7365158e+00  -8.2857010e-02
   2.2960291e+01  -2.1551654e+01   3.0000000e+02   2.5976881e-01  -5.8760508e+00   2.6335920e-01
   2.2823057e+01  -2.1538532e+01   3.0000000e+02   2.0147684e-01  -6.0078395e+00   6.2497812e-01
   2.2685413e+01  -2.1530015e+01   3.0000000e+02   1.4860056e-01  -6.1291175e+00   1.0032076e+00
   2.2547535e+01  -2.1526113e+01   3.0000000e+02   1.0313886e-01  -6.2367273e+00   1.3986186e+00
   2.2409597e+01  -2.1526832e+01   3.0000000e+02   6.6873846e-02  -6.3272826e+00   1.8110324e+00
   2.2271773e+01  -2.1532169e+01   3.0000000e+02   4.1363077e-02  -6.3973415e+00   2.2394219e+00
   2.2134238e+01  -2.1542118e+01   3.0000000e+02   2.7957469e-02  -6.4435978e+00   2.6818623e+00
   2.1997165e+01  -2.1556667e+01   3.0000000e+02   2.7807474e-02  -6.4630776e+00   3.1355406e+00
   2.1860729e+01  -2.1575798e+01   3.0000000e+02   4.1877395e-02  -6.4533298e+00   3.5967954e+00
   2.1725102e+01  -2.1599485e+01   3.0000000e+02   7.0952903e-02  -6.4126014e+00   4.0612375e+00
   2.1590456e+01  -2.1627699e+01   3.0000000e+02   1.1566226e-01  -6.3399816e+00   4.5238960e+00
   2.1456963e+01  -2.1660403e+01   3.0000000e+02   1.7647260e-01  -6.2355008e+00   4.9794099e+00
   2.1324792e+01  -2.1697557e+01   3.0000000e+02   2.5370274e-01  -6.1001701e+00   5.4222613e+00
   2.1194112e+01  -2.1739113e+01   3.0000000e+02   3.4750931e-01  -5.9359600e+00   5.8469913e+00
   2.1065091e+01  -2.1785018e+01   3.0000000e+02   4.5788463e-01  -5.7457133e+00   6.2484228e+00
   2.0937892e+01  -2.1835213e+01   3.0000000e+02   5.8464019e-01  -5.5329963e+00   6.6218575e+00
   2.0812680e+01  -2.1889635e+01   3.0000000e+02   7.2739303e-01  -5.3019260e+00   6.9631967e+00
   2.0689616e+01  -2.1948213e+01   3.0000000e+02   8.8553309e-01  -5.0569575e+00   7.2690480e+00
   2.0568860e+01  -2.2010874e+01   3.0000000e+02   1.0582164e+00  -4.8026859e+00   7.5367528e+00
   2.0450568e+01  -2.2077536e+01   3.0000000e+02   1.2443262e+00  -4.5436550e+00   7.7643852e+00
   2.0334895e+01  -2.2148115e+01   3.0000000e+02   1.4424780e+00  -4.2842092e+00   7.9507008e+00
   2.0221992e+01  -2.2222520e+01   3.0000000e+02   1.6510005e+00  -4.0283699e+00   8.0950793e+00
   2.0112007e+01  -2.2300655e+01   3.0000000e+02   1.8679480e+00  -3.7797577e+00   8.1974494e+00
   2.0005087e+01  -2.2382421e+01   3.0000000e+02   2.0911237e+00  -3.5415506e+00   8.2582130e+00
   1.9901373e+01  -2.2467711e+01   3.0000000e+02   2.3180961e+00  -3.3164512e+00   8.2781937e+00
   1.9801004e+01  -2.2556416e+01   3.0000000e+02   2.5462573e+00  -3.1066955e+00   8.2585726e+00
   1.9704116e+01  -2.2648422e+01   3.0000000e+02   2.7728654e+00  -2.9140608e+00   8.2008504e+00
   1.9610841e+01  -2.2743609e+01   3.0000000e+02   2.9951004e+00  -2.7398825e+00   8.1068171e+00
   1.9521305e+01  -2.2841855e+01   3.0000000e+02   3.2101382e+00  -2.5850751e+00   7.9785160e+00
   1.9435633e+01  -2.2943031e+01   3.0000000e+02   3.4152062e+00  -2.4501707e+00   7.8182195e+00
   1.9353944e+01  -2.3047007e+01   3.0000000e+02   3.6076639e+00  -2.3353437e+00   7.6283875e+00
   1.9276353e+01  -2.3153647e+01   3.0000000e+02   3.7850540e+00  -2.2404498e+00   7.4116380e+00
   1.9202970e+01  -2.3262812e+01   3.0000000e+02   3.9451650e+00  -2.1650666e+00   7.1706955e+00
   1.9133901e+01  -2.3374359e+01   3.0000000e+02   4.0860731e+00  -2.1085381e+00   6.9083424e+00
   1.9069247e+01  -2.3488141e+01   3.0000000e+02   4.2061715e+00  -2.0700158e+00   6.6273659e+00
   1.9009104e+01  -2.3604011e+01   3.0000000e+02   4.3041869e+00  -2.0485029e+00   6.3304920e+00
   1.8953562e+01  -2.3721815e+01   3.0000000e+02   4.3791605e+00  -2.0428823e+00   6.0203576e+00
   1.8902707e+01  -2.3841398e+01   3.0000000e+02   4.4304328e+00  -2.0519555e+00   5.6994521e+00
   1.8856619e+01  -2.3962601e+01   3.0000000e+02   4.4575983e+00  -2.0744594e+00   5.3701026e+00
   1.8815371e+01  -2.4085264e+01   3.0000000e+02   4.4604591e+00  -2.1090842e+00   5.0344600e+00
   1.8779032e+01  -2.4209225e+01   3.0000000e+02   4.4389778e+00  -2.1544928e+00   4.6945121e+00
   1.8747664e+01  -2.4334317e+01   3.0000000e+02   4.3932372e+00  -2.2093225e+00   4.3521282e+00
   1.8721324e+01  -2.4460373e+01   3.0000000e+02   4.3234230e+00  -2.2722060e+00   4.0090858e+00
   1.8700062e+01  -2.4587226e+01   3.0000000e+02   4.2298223e+00  -2.3417788e+00   3.6671231e+00
   1.8683922e+01  -2.4714703e+01   3.0000000e+02   4.1128552e+00  -2.4166896e+00   3.3279986e+00
   1.8672941e+01  -2.4842634e+01   3.0000000e+02   3.9731146e+00  -2.4956205e+00   2.9934926e+00
   1.8667150e+01  -2.4970845e+01   3.0000000e+02   3.8114294e+00  -2.5772985e+00   2.6654276e+00
   1.8666572e+01  -2.5099163e+01   3.0000000e+02   3.6289146e+00  -2.6605083e+00   2.3456293e+00
   1.8671226e+01  -2.5227412e+01   3.0000000e+02   3.4270214e+00  -2.7441111e+00   2.0358721e+00
   1.8681121e+01  -2.5355419e+01   3.0000000e+02   3.2075429e+00  -2.8270443e+00   1.7377930e+00
   1.8696260e+01  -2.5483007e+01   3.0000000e+02   2.9726127e+00  -2.9083319e+00   1.4528037e+00
   1.8716639e+01  -2.5610002e+01   3.0000000e+02   2.7246407e+00  -2.9870857e+00   1.1819758e+00
   1.8742248e+01  -2.5736228e+01   3.0000000e+02   2.4662346e+00  -3.0624992e+00   9.2595863e-01
   1.8773067e+01  -2.5861510e+01   3.0000000e+02   2.2000755e+00  -3.1338273e+00   6.8491560e-01
   1.8809070e+01  -2.5985676e+01   3.0000000e+02   1.9287759e+00  -3.2003732e+00   4.5848394e-01
   1.8850225e+01  -2.6108553e+01   3.0000000e+02   1.6547425e+00  -3.2614590e+00   2.4579504e-01
   1.8896490e+01  -2.6229968e+01   3.0000000e+02   1.3800397e+00  -3.3163883e+00   4.5545238e-02
   1.8947817e+01  -2.6349751e+01   3.0000000e+02   1.1062745e+00  -3.3644212e+00  -1.4390427e-01
   1.9004149e+01  -2.6467735e+01   3.0000000e+02   8.3453108e-01  -3.4047429e+00  -3.2436857e-01
   1.9065423e+01  -2.6583752e+01   3.0000000e+02   5.6536629e-01  -3.4364557e+00  -4.9767046e-01
   1.9131567e+01  -2.6697639e+01   3.0000000e+02   2.9884251e-01  -3.4585734e+00  -6.6545687e-01
   1.9202504e+01  -2.6809234e+01   3.0000000e+02   3.4634277e-02  -3.4700497e+00  -8.2904588e-01
   1.9278145e+01  -2.6918377e+01   3.0000000e+02  -2.2782606e-01  -3.4698092e+00  -9.8928636e-01
   1.9358398e+01  -2.7024914e+01   3.0000000e+02  -4.8919021e-01  -3.4568098e+00  -1.1465091e+00
   1.9443161e+01  -2.7128690e+01   3.0000000e+02  -7.4999898e-01  -3.4301025e+00  -1.3005046e+00
   1.9532325e+01  -2.7229558e+01   3.0000000e+02  -1.0105398e+00  -3.3888875e+00  -1.4505833e+00
   1.9625774e+01  -2.7327370e+01   3.0000000e+02  -1.2707046e+00  -3.3325673e+00  -1.5956904e+00
   1.9723385e+01  -2.7421987e+01   3.0000000e+02  -1.5299328e+00  -3.2607582e+00  -1.7345453e+00
   1.9825027e+01  -2.7513269e+01   3.0000000e+02  -1.7871754e+00  -3.1732909e+00  -1.8658063e+00
   1.9930563e+01  -2.7601086e+01   3.0000000e+02  -2.0409548e+00  -3.0701592e+00  -1.9882077e+00
   2.0039849e+01  -2.7685307e+01   3.0000000e+02  -2.2894325e+00  -2.9514652e+00  -2.1006757e+00
   2.0152735e+01  -2.7765810e+01   3.0000000e+02  -2.5305452e+00  -2.8173295e+00  -2.2023673e+00
   2.0269062e+01  -2.7842477e+01   3.0000000e+02  -2.7621260e+00  -2.6678229e+00  -2.2926567e+00
   2.0388669e+01  -2.7915196e+01   3.0000000e+02  -2.9820421e+00  -2.5029058e+00  -2.3710754e+00
   2.0511386e+01  -2.7983857e+01   3.0000000e+02  -3.1882905e+00  -2.3224151e+00  -2.4371927e+00
   2.0637038e+01  -2.8048361e+01   3.0000000e+02  -3.3790959e+00  -2.1260729e+00  -2.4904725e+00
   2.0765445e+01  -2.8108612e+01   3.0000000e+02  -3.5529519e+00  -1.9135570e+00  -2.5301617e+00
   2.0896422e+01  -2.8164520e+01   3.0000000e+02  -3.7086551e+00  -1.6845935e+00  -2.5551833e+00
   2.1029779e+01  -2.8216002e+01   3.0000000e+02  -3.8453193e+00  -1.4390748e+00  -2.5640741e+00
   2.1696587e+01  -2.8530550e+01   3.0000000e+02  -4.2881308e+00  -3.5138312e-02  -1.9501313e+00
   2.1840388e+01  -2.8554221e+01   3.0000000e+02  -4.2998136e+00   2.7451698e-01  -1.8267055e+00
   2.1985113e+01  -2.8573223e+01   3.0000000e+02  -4.2950154e+00   5.8879896e-01  -1.6724081e+00
   2.2130560e+01  -2.8587531e+01   3.0000000e+02  -4.2754546e+00   9.0314098e-01  -1.4856105e+00
   2.2276525e+01  -2.8597124e+01   3.0000000e+02  -4.2431555e+00   1.2123353e+00  -1.2656285e+00
   2.2422804e+01  -2.8601989e+01   3.0000000e+02  -4.2003937e+00   1.5107469e+00  -1.0129536e+00
   2.2569191e+01  -2.8602118e+01   3.0000000e+02  -4.1496209e+00   1.7926008e+00  -7.2943952e-01
   2.2715481e+01  -2.8597512e+01   3.0000000e+02  -4.0933688e+00   2.0523357e+00  -4.1835588e-01
   2.2861468e+01  -2.8588178e+01   3.0000000e+02  -4.0341451e+00   2.2849686e+00  -8.4339627e-02
   2.3006949e+01  -2.8574127e+01   3.0000000e+02  -3.9743250e+00   2.4864434e+00   2.6680400e-01
   2.3151719e+01  -2.8555381e+01   3.0000000e+02  -3.9160509e+00   2.6538890e+00   6.2841455e-01
   2.3295575e+01  -2.8531965e+01   3.0000000e+02  -3.8611537e+00   2.7857939e+00   9.9335654e-01
   2.3438319e+01  -2.8503913e+01   3.0000000e+02  -3.8110938e+00   2.8820430e+00   1.3544630e+00
   2.3579750e+01  -2.8471263e+01   3.0000000e+02  -3.7669482e+00   2.9438353e+00   1.7049033e+00
   2.3719672e+01  -2.8434062e+01   3.0000000e+02  -3.7294119e+00   2.9735028e+00   2.0385576e+00
   2.3857891e+01  -2.8392362e+01   3.0000000e+02  -3.6988418e+00   2.9742566e+00   2.3502480e+00
   2.3994218e+01  -2.8346222e+01   3.0000000e+02  -3.6753118e+00   2.9498958e+00   2.6358924e+00
   2.4128466e+01  -2.8295705e+01   3.0000000e+02  -3.6586868e+00   2.9045214e+00   2.8925247e+00
   2.4260450e+01  -2.8240882e+01   3.0000000e+02  -3.6486865e+00   2.8422776e+00   3.1182480e+00
   2.4389991e+01  -2.8181830e+01   3.0000000e+02  -3.6449467e+00   2.7671436e+00   3.3121175e+00
   2.4516915e+01  -2.8118631e+01   3.0000000e+02  -3.6470694e+00   2.6827884e+00   3.4739696e+00
   2.4641050e+01  -2.8051372e+01   3.0000000e+02  -3.6546578e+00   2.5924884e+00   3.6042367e+00
   2.4762232e+01  -2.7980147e+01   3.0000000e+02  -3.6673280e+00   2.4990870e+00   3.7037929e+00
   2.4880300e+01  -2.7905054e+01   3.0000000e+02  -3.6847238e+00   2.4050086e+00   3.7737885e+00
   2.4995099e+01  -2.7826197e+01   3.0000000e+02  -3.7065117e+00   2.3122839e+00   3.8155432e+00
   2.5106478e+01  -2.7743684e+01   3.0000000e+02  -3.7323813e+00   2.2225946e+00   3.8304537e+00
   2.5214294e+01  -2.7657628e+01   3.0000000e+02  -3.7620364e+00   2.1373040e+00   3.8199458e+00
   2.5318409e+01  -2.7568147e+01   3.0000000e+02  -3.7951925e+00   2.0574887e+00   3.7854314e+00
   2.5418691e+01  -2.7475363e+01   3.0000000e+02  -3.8315711e+00   1.9839523e+00   3.7282812e+00
   2.5515015e+01  -2.7379402e+01   3.0000000e+02  -3.8708882e+00   1.9172278e+00   3.6498018e+00
   2.5607260e+01  -2.7280395e+01   3.0000000e+02  -3.9128354e+00   1.8575807e+00   3.5512087e+00
   2.5695315e+01  -2.7178474e+01   3.0000000e+02  -3.9570480e+00   1.8050047e+00   3.4336012e+00
   2.5779072e+01  -2.7073779e+01   3.0000000e+02  -4.0030599e+00   1.7592397e+00   3.2979514e+00
   2.5858433e+01  -2.6966448e+01   3.0000000e+02  -4.0502593e+00   1.7197952e+00   3.1450882e+00
   2.5933304e+01  -2.6856627e+01   3.0000000e+02  -4.0978357e+00   1.6859950e+00   2.9757341e+00
   2.6003599e+01  -2.6744461e+01   3.0000000e+02  -4.1447531e+00   1.6570307e+00   2.7905349e+00
   2.6069240e+01  -2.6630099e+01   3.0000000e+02  -4.1897408e+00   1.6320185e+00   2.5901418e+00
   2.6130153e+01  -2.6513695e+01   3.0000000e+02  -4.2313239e+00   1.6100600e+00   2.3752890e+00
   2.6186274e+01  -2.6395400e+01   3.0000000e+02  -4.2678917e+00   1.5902861e+00   2.1468596e+00
   2.6237544e+01  -2.6275372e+01   3.0000000e+02  -4.2977909e+00   1.5718914e+00   1.9059623e+00
   2.6283911e+01  -2.6153767e+01   3.0000000e+02  -4.3194442e+00   1.5541518e+00   1.6539376e+00
   2.6325330e+01  -2.6030745e+01   3.0000000e+02  -4.3314646e+00   1.5364251e+00   1.3923604e+00
   2.6361764e+01  -2.5906467e+01   3.0000000e+02  -4.3327583e+00   1.5181400e+00   1.1229831e+00
   2.6393181e+01  -2.5781093e+01   3.0000000e+02  -4.3225976e+00   1.4987788e+00   8.4764643e-01
   2.6419557e+01  -2.5654786e+01   3.0000000e+02  -4.3006553e+00   1.4778479e+00   5.6819422e-01
   2.6440874e+01  -2.5527710e+01   3.0000000e+02  -4.2669983e+00   1.4548487e+00   2.8636080e-01
   2.6457122e+01  -2.5400027e+01   3.0000000e+02  -4.2220396e+00   1.4292430e+00   3.6699724e-03
   2.6468295e+01  -2.5271901e+01   3.0000000e+02  -4.1664554e+00   1.4004221e+00  -2.7863679e-01
   2.6474395e+01  -2.5143497e+01   3.0000000e+02  -4.1010741e+00   1.3676728e+00  -5.5964372e-01
   2.6475432e+01  -2.5014978e+01   3.0000000e+02  -4.0267463e+00   1.3301502e+00  -8.3877343e-01
   2.6471419e+01  -2.4886507e+01   3.0000000e+02  -3.9442121e+00   1.2868628e+00  -1.1157488e+00
   2.6462377e+01  -2.4758246e+01   3.0000000e+02  -3.8539840e+00   1.2366635e+00  -1.3905014e+00
   2.6448333e+01  -2.4630359e+01   3.0000000e+02  -3.7562607e+00   1.1782650e+00  -1.6630391e+00
   2.6429320e+01  -2.4503005e+01   3.0000000e+02  -3.6508844e+00   1.1102685e+00  -1.9333012e+00
   2.6405378e+01  -2.4376344e+01   3.0000000e+02  -3.5373646e+00   1.0312207e+00  -2.2009778e+00
   2.6376549e+01  -2.4250535e+01   3.0000000e+02  -3.4149557e+00   9.3968780e-01  -2.4653698e+00
   2.6342885e+01  -2.4125735e+01   3.0000000e+02  -3.2827945e+00   8.3434124e-01  -2.7252712e+00
   2.6304441e+01  -2.4002099e+01   3.0000000e+02  -3.1400641e+00   7.1405138e-01  -2.9789323e+00
   2.6261278e+01  -2.3879780e+01   3.0000000e+02  -2.9861696e+00   5.7797354e-01  -3.2240822e+00
   2.6213463e+01  -2.3758931e+01   3.0000000e+02  -2.8208932e+00   4.2562006e-01  -3.4580239e+00
   2.6161066e+01  -2.3639699e+01   3.0000000e+02  -2.6444894e+00   2.5689657e-01  -3.6777974e+00
   2.6104165e+01  -2.3522232e+01   3.0000000e+02  -2.4577383e+00   7.2126371e-02  -3.8803428e+00
   2.6042840e+01  -2.3406674e+01   3.0000000e+02  -2.2619098e+00  -1.2797088e-01  -4.0626917e+00
   2.5977179e+01  -2.3293167e+01   3.0000000e+02  -2.0586947e+00  -3.4230770e-01  -4.2221072e+00
   2.5907270e+01  -2.3181849e+01   3.0000000e+02  -1.8500801e+00  -5.6948402e-01  -4.3561986e+00
   2.5833210e+01  -2.3072856e+01   3.0000000e+02  -1.6382449e+00  -8.0782796e-01  -4.4629689e+00
   2.5755099e+01  -2.2966321e+01   3.0000000e+02  -1.4254446e+00  -1.0554489e+00  -4.5408395e+00
   2.5673039e+01  -2.2862374e+01   3.0000000e+02  -1.2139322e+00  -1.3102812e+00  -4.5886430e+00
   2.5587139e+01  -2.2761140e+01   3.0000000e+02  -1.0059195e+00  -1.5701193e+00  -4.6056109e+00
   2.5497509e+01  -2.2662741e+01   3.0000000e+02  -8.0355283e-01  -1.8326586e+00  -4.5913693e+00
   2.5404267e+01  -2.2567298e+01   3.0000000e+02  -6.0892411e-01  -2.0955269e+00  -4.5459521e+00
   2.5307530e+01  -2.2474924e+01   3.0000000e+02  -4.2405620e-01  -2.3563593e+00  -4.4698235e+00
   2.5207421e+01  -2.2385731e+01   3.0000000e+02  -2.5091368e-01  -2.6128456e+00  -4.3639118e+00
   2.5104067e+01  -2.2299826e+01   3.0000000e+02  -9.1377418e-02  -2.8628187e+00  -4.2296341e+00
   2.4997595e+01  -2.2217313e+01   3.0000000e+02   5.2797227e-02  -3.1043488e+00  -4.0689003e+00
   2.4888140e+01  -2.2138290e+01   3.0000000e+02   1.8002696e-01  -3.3358341e+00  -3.8840921e+00
   2.4775834e+01  -2.2062851e+01   3.0000000e+02   2.8897916e-01  -3.5561053e+00  -3.6779871e+00
   2.4660818e+01  -2.1991088e+01   3.0000000e+02   3.7863223e-01  -3.7644878e+00  -3.4536627e+00
   2.4543230e+01  -2.1923085e+01   3.0000000e+02   4.4835574e-01  -3.9608742e+00  -3.2143231e+00
   2.4423215e+01  -2.1858924e+01   3.0000000e+02   4.9795845e-01  -4.1457180e+00  -2.9631301e+00
   2.4300916e+01  -2.1798682e+01   3.0000000e+02   5.2773082e-01  -4.3200106e+00  -2.7029832e+00
   2.4176483e+01  -2.1742429e+01   3.0000000e+02   5.3844876e-01  -4.4851802e+00  -2.4363317e+00
   2.4050064e+01  -2.1690233e+01   3.0000000e+02   5.3136187e-01  -4.6429609e+00  -2.1649919e+00
   2.3921812e+01  -2.1642156e+01   3.0000000e+02   5.0814359e-01  -4.7952078e+00  -1.8900320e+00
   2.3791878e+01  -2.1598255e+01   3.0000000e+02   4.7082460e-01  -4.9437055e+00  -1.6117020e+00
   2.3660419e+01  -2.1558582e+01   3.0000000e+02   4.2170848e-01  -5.0899605e+00  -1.3294639e+00
   2.3527589e+01  -2.1523184e+01   3.0000000e+02   3.6328094e-01  -5.2350329e+00  -1.0420586e+00
   2.3393548e+01  -2.1492103e+01   3.0000000e+02   2.9812064e-01  -5.3793860e+00  -7.4766923e-01
   2.3258453e+01  -2.1465376e+01   3.0000000e+02   2.2881532e-01  -5.5228043e+00  -4.4409147e-01
   2.3122465e+01  -2.1443035e+01   3.0000000e+02   1.5789244e-01  -5.6643461e+00  -1.2896254e-01
   2.2985743e+01  -2.1425105e+01   3.0000000e+02   8.7758537e-02  -5.8023611e+00   2.0002944e-01
   2.2848449e+01  -2.1411609e+01   3.0000000e+02   2.0665954e-02  -5.9345456e+00   5.4491845e-01
   2.2710745e+01  -2.1402561e+01   3.0000000e+02  -4.1324600e-02  -6.0580413e+00   9.0727037e-01
   2.2572793e+01  -2.1397974e+01   3.0000000e+02  -9.6346950e-02  -6.1695696e+00   1.2880152e+00
   2.2434756e+01  -2.1397852e+01   3.0000000e+02  -1.4274410e-01  -6.2655847e+00   1.6873079e+00
   2.2296795e+01  -2.1402195e+01   3.0000000e+02  -1.7905701e-01  -6.3424549e+00   2.1044428e+00
   2.2159073e+01  -2.1410999e+01   3.0000000e+02  -2.0401236e-01  -6.3966498e+00   2.5377922e+00
   2.2021753e+01  -2.1424252e+01   3.0000000e+02  -2.1651655e-01  -6.4249372e+00   2.9848059e+00
   2.1884995e+01  -2.1441940e+01   3.0000000e+02  -2.1563199e-01  -6.4245777e+00   3.4420726e+00
   2.1748963e+01  -2.1464041e+01   3.0000000e+02  -2.0057301e-01  -6.3935013e+00   3.9053931e+00
   2.1613815e+01  -2.1490528e+01   3.0000000e+02  -1.7069245e-01  -6.3304577e+00   4.3699619e+00
   2.1479712e+01  -2.1521372e+01   3.0000000e+02  -1.2546593e-01  -6.2351271e+00   4.8305297e+00
   2.1346812e+01  -2.1556535e+01   3.0000000e+02  -6.4502972e-02  -6.1081712e+00   5.2816360e+00
   2.1215274e+01  -2.1595975e+01   3.0000000e+02   1.2463172e-02  -5.9512288e+00   5.7178299e+00
   2.1085253e+01  -2.1639647e+01   3.0000000e+02   1.0557298e-01  -5.7668371e+00   6.1339087e+00
   2.0956904e+01  -2.1687497e+01   3.0000000e+02   2.1481713e-01  -5.5583039e+00   6.5250952e+00
   2.0830381e+01  -2.1739469e+01   3.0000000e+02   3.4003618e-01  -5.3295316e+00   6.8871969e+00
   2.0705835e+01  -2.1795501e+01   3.0000000e+02   4.8089023e-01  -5.0848110e+00   7.2167065e+00
   2.0583416e+01  -2.1855528e+01   3.0000000e+02   6.3684178e-01  -4.8286190e+00   7.5108396e+00
   2.0463272e+01  -2.1919476e+01   3.0000000e+02   8.0711483e-01  -4.5654258e+00   7.7675309e+00
   2.0345548e+01  -2.1987271e+01   3.0000000e+02   9.9069632e-01  -4.2995324e+00   7.9853921e+00
   2.0230387e+01  -2.2058831e+01   3.0000000e+02   1.1862998e+00  -4.0349498e+00   8.1636400e+00
   2.0117930e+01  -2.2134070e+01   3.0000000e+02   1.3923708e+00  -3.7753167e+00   8.3020180e+00
   2.0008315e+01  -2.2212900e+01   3.0000000e+02   1.6070993e+00  -3.5238504e+00   8.4007172e+00
   1.9901677e+01  -2.2295225e+01   3.0000000e+02   1.8284217e+00  -3.2833281e+00   8.4603073e+00
   1.9798149e+01  -2.2380947e+01   3.0000000e+02   2.0540678e+00  -3.0560913e+00   8.4816750e+00
   1.9697859e+01  -2.2469962e+01   3.0000000e+02   2.2815886e+00  -2.8440538e+00   8.4659842e+00
   1.9600935e+01  -2.2562165e+01   3.0000000e+02   2.5084186e+00  -2.6487350e+00   8.4146327e+00
   1.9507498e+01  -2.2657444e+01   3.0000000e+02   2.7319100e+00  -2.4712675e+00   8.3292404e+00
   1.9417668e+01  -2.2755684e+01   3.0000000e+02   2.9494013e+00  -2.3124377e+00   8.2116201e+00
   1.9331561e+01  -2.2856766e+01   3.0000000e+02   3.1582720e+00  -2.1727060e+00   8.0637636e+00
   1.9249288e+01  -2.2960568e+01   3.0000000e+02   3.3560023e+00  -2.0522347e+00   7.8878193e+00
   1.9170958e+01  -2.3066965e+01   3.0000000e+02   3.5402286e+00  -1.9509264e+00   7.6860673e+00
   1.9096674e+01  -2.3175827e+01   3.0000000e+02   3.7087884e+00  -1.8684477e+00   7.4608962e+00
   1.9026536e+01  -2.3287021e+01   3.0000000e+02   3.8597688e+00  -1.8042724e+00   7.2147633e+00
   1.8960640e+01  -2.3400412e+01   3.0000000e+02   3.9915393e+00  -1.7577140e+00   6.9501525e+00
   1.8899076e+01  -2.3515861e+01   3.0000000e+02   4.1027653e+00  -1.7279526e+00   6.6695382e+00
   1.8841930e+01  -2.3633227e+01   3.0000000e+02   4.1924145e+00  -1.7140670e+00   6.3753362e+00
   1.8789285e+01  -2.3752366e+01   3.0000000e+02   4.2597424e+00  -1.7150585e+00   6.0698664e+00
   1.8741217e+01  -2.3873132e+01   3.0000000e+02   4.3042589e+00  -1.7298581e+00   5.7553221e+00
   1.8697798e+01  -2.3995374e+01   3.0000000e+02   4.3256879e+00  -1.7573415e+00   5.4337590e+00
   1.8659095e+01  -2.4118942e+01   3.0000000e+02   4.3239221e+00  -1.7963416e+00   5.1070783e+00
   1.8625168e+01  -2.4243682e+01   3.0000000e+02   4.2989738e+00  -1.8456471e+00   4.7770606e+00
   1.8596073e+01  -2.4369440e+01   3.0000000e+02   4.2509460e+00  -1.9040217e+00   4.4453862e+00
   1.8571862e+01  -2.4496058e+01   3.0000000e+02   4.1800199e+00  -1.9702117e+00   4.1136912e+00
   1.8552579e+01  -2.4623378e+01   3.0000000e+02   4.0864621e+00  -2.0429536e+00   3.7836076e+00
   1.8538262e+01  -2.4751241e+01   3.0000000e+02   3.9706607e+00  -2.1209921e+00   3.4568030e+00
   1.8528946e+01  -2.4879485e+01   3.0000000e+02   3.8331825e+00  -2.2030997e+00   3.1350002e+00
   1.8524657e+01  -2.5007949e+01   3.0000000e+02   3.6748253e+00  -2.2880814e+00   2.8199681e+00
   1.8525417e+01  -2.5136470e+01   3.0000000e+02   3.4966822e+00  -2.3747959e+00   2.5134854e+00
   1.8531240e+01  -2.5264884e+01   3.0000000e+02   3.3001780e+00  -2.4621593e+00   2.2172786e+00
   1.8542136e+01  -2.5393029e+01   3.0000000e+02   3.0870811e+00  -2.5491639e+00   1.9329215e+00
   1.8558106e+01  -2.5520741e+01   3.0000000e+02   2.8594870e+00  -2.6348714e+00   1.6617542e+00
   1.8579146e+01  -2.5647854e+01   3.0000000e+02   2.6197650e+00  -2.7184248e+00   1.4047747e+00
   1.8605246e+01  -2.5774207e+01   3.0000000e+02   2.3704534e+00  -2.7990448e+00   1.1625419e+00
   1.8636388e+01  -2.5899636e+01   3.0000000e+02   2.1141546e+00  -2.8760143e+00   9.3513366e-01
   1.8672548e+01  -2.6023979e+01   3.0000000e+02   1.8533884e+00  -2.9486674e+00   7.2210942e-01
   1.8713696e+01  -2.6147074e+01   3.0000000e+02   1.5904535e+00  -3.0163659e+00   5.2253242e-01
   1.8759793e+01  -2.6268760e+01   3.0000000e+02   1.3272934e+00  -3.0784661e+00   3.3504112e-01
   1.8810796e+01  -2.6388879e+01   3.0000000e+02   1.0653871e+00  -3.1342983e+00   1.5794842e-01
   1.8866653e+01  -2.6507272e+01   3.0000000e+02   8.0569397e-01  -3.1831327e+00  -1.0597862e-02
   1.8927306e+01  -2.6623784e+01   3.0000000e+02   5.4863025e-01  -3.2241668e+00  -1.7245522e-01
   1.8992690e+01  -2.6738261e+01   3.0000000e+02   2.9411910e-01  -3.2565206e+00  -3.2930937e-01
   1.9062733e+01  -2.6850551e+01   3.0000000e+02   4.1685053e-02  -3.2792501e+00  -4.8251759e-01
   1.9137356e+01  -2.6960505e+01   3.0000000e+02  -2.0940735e-01  -3.2913782e+00  -6.3298600e-01
   1.9216473e+01  -2.7067975e+01   3.0000000e+02  -4.5998113e-01  -3.2919432e+00  -7.8109770e-01
   1.9299993e+01  -2.7172819e+01   3.0000000e+02  -7.1078005e-01  -3.2800534e+00  -9.2670318e-01
   1.9387815e+01  -2.7274895e+01   3.0000000e+02  -9.6228846e-01  -3.2549449e+00  -1.0691593e+00
   1.9479834e+01  -2.7374065e+01   3.0000000e+02  -1.2146093e+00  -3.2160334e+00  -1.2074459e+00
   1.9575937e+01  -2.7470196e+01   3.0000000e+02  -1.4673752e+00  -3.1629380e+00  -1.3402985e+00
   1.9676006e+01  -2.7563157e+01   3.0000000e+02  -1.7197145e+00  -3.0954883e+00  -1.4663803e+00
   1.9779915e+01  -2.7652821e+01   3.0000000e+02  -1.9702773e+00  -3.0136912e+00  -1.5844301e+00
   1.9887532e+01  -2.7739068e+01   3.0000000e+02  -2.2173178e+00  -2.9176713e+00  -1.6933890e+00
   1.9998720e+01  -2.7821778e+01   3.0000000e+02  -2.4587971e+00  -2.8076001e+00  -1.7924860e+00
   2.0113335e+01  -2.7900838e+01   3.0000000e+02  -2.6925239e+00  -2.6836045e+00  -1.8812377e+00
   2.0231228e+01  -2.7976139e+01   3.0000000e+02  -2.9162846e+00  -2.5456971e+00  -1.9594060e+00
   2.0352244e+01  -2.8047578e+01   3.0000000e+02  -3.1279616e+00  -2.3937263e+00  -2.0268883e+00
   2.0476222e+01  -2.8115056e+01   3.0000000e+02  -3.3256200e+00  -2.2273700e+00  -2.0835850e+00
   2.0602998e+01  -2.8178480e+01   3.0000000e+02  -3.5075719e+00  -2.0461624e+00  -2.1292535e+00
   2.0732401e+01  -2.8237761e+01   3.0000000e+02  -3.6724006e+00  -1.8495705e+00  -2.1633725e+00
   2.0864256e+01  -2.8292817e+01   3.0000000e+02  -3.8189772e+00  -1.6370902e+00  -2.1850388e+00
   2.0998384e+01  -2.8343571e+01   3.0000000e+02  -3.9464571e+00  -1.4083690e+00  -2.1929135e+00
   2.1134602e+01  -2.8389953e+01   3.0000000e+02  -4.0542804e+00  -1.1633316e+00  -2.1852049e+00
   2.1272723e+01  -2.8431898e+01   3.0000000e+02  -4.1421740e+00  -9.0230923e-01  -2.1597080e+00
   2.1412557e+01  -2.8469346e+01   3.0000000e+02  -4.2101627e+00  -6.2615695e-01  -2.1138832e+00
   2.1553910e+01  -2.8502246e+01   3.0000000e+02  -4.2585895e+00  -3.3636338e-01  -2.0449630e+00
   2.2269128e+01  -2.8725255e+01   3.0000000e+02  -4.2368831e+00   1.1539215e+00  -9.4264460e-01
   2.2415792e+01  -2.8730185e+01   3.0000000e+02  -4.1795411e+00   1.4446308e+00  -7.0202968e-01
   2.2562566e+01  -2.8730523e+01   3.0000000e+02  -4.1134611e+00   1.7202647e+00  -4.3023137e-01
   2.2709259e+01  -2.8726270e+01   3.0000000e+02  -4.0412580e+00   1.9751697e+00  -1.3003716e-01
   2.2855675e+01  -2.8717431e+01   3.0000000e+02  -3.9655913e+00   2.2041836e+00   1.9435090e-01
   2.3001624e+01  -2.8704018e+01   3.0000000e+02  -3.8890435e+00   2.4030031e+00   5.3751051e-01
   2.3146912e+01  -2.8686049e+01   3.0000000e+02  -3.8140129e+00   2.5684571e+00   8.9305707e-01
   2.3291350e+01  -2.8663546e+01   3.0000000e+02  -3.7426113e+00   2.6987086e+00   1.2540330e+00
   2.3434748e+01  -2.8636541e+01   3.0000000e+02  -3.6765888e+00   2.7933129e+00   1.6133178e+00
   2.3576918e+01  -2.8605068e+01   3.0000000e+02  -3.6172962e+00   2.8531748e+00   1.9640276e+00
   2.3717676e+01  -2.8569169e+01   3.0000000e+02  -3.5656719e+00   2.8803860e+00   2.2998901e+00
   2.3856838e+01  -2.8528892e+01   3.0000000e+02  -3.5222699e+00   2.8779885e+00   2.6155028e+00
   2.3994225e+01  -2.8484289e+01   3.0000000e+02  -3.4873108e+00   2.8496947e+00   2.9065154e+00
   2.4129659e+01  -2.8435419e+01   3.0000000e+02  -3.4607460e+00   2.7995961e+00   3.1696901e+00
   2.4262966e+01  -2.8382346e+01   3.0000000e+02  -3.4423304e+00   2.7318962e+00   3.4028776e+00
   2.4393977e+01  -2.8325140e+01   3.0000000e+02  -3.4316876e+00   2.6506855e+00   3.6049170e+00
   2.4522525e+01  -2.8263874e+01   3.0000000e+02  -3.4283743e+00   2.5597820e+00   3.7754696e+00
   2.4648447e+01  -2.8198630e+01   3.0000000e+02  -3.4319127e+00   2.4626221e+00   3.9148590e+00
   2.4771586e+01  -2.8129492e+01   3.0000000e+02  -3.4418283e+00   2.3622163e+00   4.0238867e+00
   2.4891788e+01  -2.8056549e+01   3.0000000e+02  -3.4576631e+00   2.2611478e+00   4.1036738e+00
   2.5008905e+01  -2.7979897e+01   3.0000000e+02  -3.4789778e+00   2.1615939e+00   4.1555429e+00
   2.5122793e+01  -2.7899633e+01   3.0000000e+02  -3.5053643e+00   2.0653759e+00   4.1809081e+00
   2.5233313e+01  -2.7815863e+01   3.0000000e+02  -3.5364332e+00   1.9739934e+00   4.1812284e+00
   2.5340333e+01  -2.7728693e+01   3.0000000e+02  -3.5718265e+00   1.8886631e+00   4.1579524e+00
   2.5443724e+01  -2.7638234e+01   3.0000000e+02  -3.6112147e+00   1.8103402e+00   4.1124963e+00
   2.5543365e+01  -2.7544604e+01   3.0000000e+02  -3.6542890e+00   1.7397136e+00   4.0462322e+00
   2.5639139e+01  -2.7447920e+01   3.0000000e+02  -3.7007675e+00   1.6772133e+00   3.9604420e+00
   2.5730936e+01  -2.7348306e+01   3.0000000e+02  -3.7503624e+00   1.6229904e+00   3.8563073e+00
   2.5818651e+01  -2.7245887e+01   3.0000000e+02  -3.8027547e+00   1.5769217e+00   3.7348630e+00
   2.5902185e+01  -2.7140794e+01   3.0000000e+02  -3.8575381e+00   1.5386149e+00   3.5969837e+00
   2.5981446e+01  -2.7033159e+01   3.0000000e+02  -3.9141654e+00   1.5074397e+00   3.4433667e+00
   2.6056348e+01  -2.6923116e+01   3.0000000e+02  -3.9718890e+00   1.4825738e+00   3.2745500e+00
   2.6126811e+01  -2.6810803e+01   3.0000000e+02  -4.0297150e+00   1.4630610e+00   3.0909667e+00
   2.6192761e+01  -2.6696360e+01   3.0000000e+02  -4.0863876e+00   1.4478782e+00   2.8930167e+00
   2.6254129e+01  -2.6579929e+01   3.0000000e+02  -4.1404101e+00   1.4359988e+00   2.6811580e+00
   2.6310856e+01  -2.6461654e+01   3.0000000e+02  -4.1901029e+00   1.4264392e+00   2.4560065e+00
   2.6362886e+01  -2.6341682e+01   3.0000000e+02  -4.2337030e+00   1.4183042e+00   2.2184065e+00
   2.6410170e+01  -2.6220159e+01   3.0000000e+02  -4.2694842e+00   1.4108041e+00   1.9694702e+00
   2.6452665e+01  -2.6097235e+01   3.0000000e+02  -4.2958813e+00   1.4032576e+00   1.7105916e+00
   2.6490336e+01  -2.5973060e+01   3.0000000e+02  -4.3116083e+00   1.3950819e+00   1.4434020e+00
   2.6523153e+01  -2.5847785e+01   3.0000000e+02  -4.3157481e+00   1.3857757e+00   1.1696945e+00
   2.6551090e+01  -2.5721561e+01   3.0000000e+02  -4.3078056e+00   1.3748923e+00   8.9132272e-01
   2.6574131e+01  -2.5594542e+01   3.0000000e+02  -4.2877193e+00   1.3620035e+00   6.1010530e-01
   2.6592264e+01  -2.5466880e+01   3.0000000e+02  -4.2558313e+00   1.3466702e+00   3.2769770e-01
   2.6605482e+01  -2.5338729e+01   3.0000000e+02  -4.2128184e+00   1.3284059e+00   4.5507838e-02
   2.6613785e+01  -2.5210243e+01   3.0000000e+02  -4.1595907e+00   1.3066411e+00  -2.3537802e-01
   2.6617180e+01  -2.5081574e+01   3.0000000e+02  -4.0971645e+00   1.2806917e+00  -5.1423734e-01
   2.6615678e+01  -2.4952875e+01   3.0000000e+02  -4.0265247e+00   1.2497361e+00  -7.9070408e-01
   2.6609296e+01  -2.4824299e+01   3.0000000e+02  -3.9484880e+00   1.2127980e+00  -1.0647176e+00
   2.6598056e+01  -2.4695999e+01   3.0000000e+02  -3.8635845e+00   1.1687466e+00  -1.3364252e+00
   2.6581987e+01  -2.4568124e+01   3.0000000e+02  -3.7719749e+00   1.1163102e+00  -1.6060480e+00
   2.6561123e+01  -2.4440827e+01   3.0000000e+02  -3.6734255e+00   1.0541178e+00  -1.8737007e+00
   2.6535501e+01  -2.4314254e+01   3.0000000e+02  -3.5673322e+00   9.8075192e-01  -2.1392443e+00
   2.6505167e+01  -2.4188555e+01   3.0000000e+02  -3.4528257e+00   8.9483043e-01  -2.4021059e+00
   2.6470168e+01  -2.4063876e+01   3.0000000e+02  -3.3289070e+00   7.9509067e-01  -2.6611994e+00
   2.6430559e+01  -2.3940361e+01   3.0000000e+02  -3.1946295e+00   6.8048037e-01  -2.9148719e+00
   2.6386398e+01  -2.3818154e+01   3.0000000e+02  -3.0492769e+00   5.5024037e-01  -3.1609411e+00
   2.6337749e+01  -2.3697395e+01   3.0000000e+02  -2.8925151e+00   4.0396272e-01  -3.3968011e+00
   2.6284679e+01  -2.3578225e+01   3.0000000e+02  -2.7244951e+00   2.4162922e-01  -3.6195724e+00
   2.6227262e+01  -2.3460779e+01   3.0000000e+02  -2.5458874e+00   6.3610161e-02  -3.8262850e+00
   2.6165574e+01  -2.3345193e+01   3.0000000e+02  -2.3578538e+00  -1.2935117e-01  -4.0140454e+00
   2.6099696e+01  -2.3231599e+01   3.0000000e+02  -2.1619639e+00  -3.3618315e-01  -4.1801799e+00
   2.6029713e+01  -2.3120126e+01   3.0000000e+02  -1.9600825e+00  -5.5553392e-01  -4.3223272e+00
   2.5955714e+01  -2.3010902e+01   3.0000000e+02  -1.7542555e+00  -7.8581638e-01  -4.4384827e+00
   2.5877794e+01  -2.2904050e+01   3.0000000e+02  -1.5466080e+00  -1.0252528e+00  -4.5270097e+00
   2.5796047e+01  -2.2799692e+01   3.0000000e+02  -1.3392691e+00  -1.2719076e+00  -4.5866290e+00
   2.5710576e+01  -2.2697946e+01   3.0000000e+02  -1.1343465e+00  -1.5237069e+00  -4.6164051e+00
   2.5621484e+01  -2.2598927e+01   3.0000000e+02  -9.3390519e-01  -1.7784702e+00  -4.6157499e+00
   2.5528878e+01  -2.2502747e+01   3.0000000e+02  -7.3997876e-01  -2.0339355e+00  -4.5844429e+00
   2.5432870e+01  -2.2409513e+01   3.0000000e+02  -5.5457775e-01  -2.2878010e+00  -4.5226706e+00
   2.5333573e+01  -2.2319331e+01   3.0000000e+02  -3.7968524e-01  -2.5377808e+00  -4.4310745e+00
   2.5231104e+01  -2.2232302e+01   3.0000000e+02  -2.1724057e-01  -2.7816790e+00  -4.3107960e+00
   2.5125583e+01  -2.2148524e+01   3.0000000e+02  -6.9101859e-02  -3.0174766e+00  -4.1635038e+00
   2.5017132e+01  -2.2068090e+01   3.0000000e+02   6.3010901e-02  -3.2434324e+00  -3.9913892e+00
   2.4905878e+01  -2.1991089e+01   3.0000000e+02   1.7758067e-01  -3.4581798e+00  -3.7971258e+00
   2.4791947e+01  -2.1917609e+01   3.0000000e+02   2.7337457e-01  -3.6608251e+00  -3.5837756e+00
   2.4675470e+01  -2.1847731e+01   3.0000000e+02   3.4951285e-01  -3.8510207e+00  -3.3546549e+00
   2.4556580e+01  -2.1781533e+01   3.0000000e+02   4.0553571e-01  -4.0290073e+00  -3.1131557e+00
   2.4435411e+01  -2.1719088e+01   3.0000000e+02   4.4144999e-01  -4.1956133e+00  -2.8625351e+00
   2.4312100e+01  -2.1660467e+01   3.0000000e+02   4.5775125e-01  -4.3521969e+00  -2.6057039e+00
   2.4186786e+01  -2.1605733e+01   3.0000000e+02   4.5541628e-01  -4.5005389e+00  -2.3450150e+00
   2.4059608e+01  -2.1554947e+01   3.0000000e+02   4.3587092e-01  -4.6426856e+00  -2.0820975e+00
   2.3930710e+01  -2.1508167e+01   3.0000000e+02   4.0092984e-01  -4.7807509e+00  -1.8177535e+00
   2.3800234e+01  -2.1465444e+01   3.0000000e+02   3.5271516e-01  -4.9167160e+00  -1.5519026e+00
   2.3668325e+01  -2.1426825e+01   3.0000000e+02   2.9356762e-01  -5.0522214e+00  -1.2836291e+00
   2.3535131e+01  -2.1392352e+01   3.0000000e+02   2.2595433e-01  -5.1883903e+00  -1.0112873e+00
   2.3400797e+01  -2.1362065e+01   3.0000000e+02   1.5238365e-01  -5.3257029e+00  -7.3265430e-01
   2.3265473e+01  -2.1335996e+01   3.0000000e+02   7.5325570e-02  -5.4639012e+00  -4.4514722e-01
   2.3129308e+01  -2.1314174e+01   3.0000000e+02  -2.8456596e-03  -5.6019674e+00  -1.4603789e-01
   2.2992451e+01  -2.1296624e+01   3.0000000e+02  -7.9897149e-02  -5.7381437e+00   1.6731715e-01
   2.2855053e+01  -2.1283364e+01   3.0000000e+02  -1.5376991e-01  -5.8699947e+00   4.9725282e-01
   2.2717265e+01  -2.1274410e+01   3.0000000e+02  -2.2258904e-01  -5.9945174e+00   8.4560329e-01
   2.2579239e+01  -2.1269771e+01   3.0000000e+02  -2.8467389e-01  -6.1082730e+00   1.2135305e+00
   2.2441126e+01  -2.1269452e+01   3.0000000e+02  -3.3853024e-01  -6.2075516e+00   1.6013978e+00
   2.2303077e+01  -2.1273454e+01   3.0000000e+02  -3.8283869e-01  -6.2885495e+00   2.0086765e+00
   2.2165245e+01  -2.1281773e+01   3.0000000e+02  -4.1644102e-01  -6.3475586e+00   2.4338914e+00
   2.2027780e+01  -2.1294398e+01   3.0000000e+02  -4.3833011e-01  -6.3811640e+00   2.8746334e+00
   2.1890834e+01  -2.1311317e+01   3.0000000e+02  -4.4762453e-01  -6.3864367e+00   3.3275991e+00
   2.1754557e+01  -2.1332510e+01   3.0000000e+02  -4.4356917e-01  -6.3611103e+00   3.7886966e+00
   2.1619100e+01  -2.1357955e+01   3.0000000e+02  -4.2551529e-01  -6.3037353e+00   4.2531889e+00
   2.1484611e+01  -2.1387622e+01   3.0000000e+02  -3.9292553e-01  -6.2137877e+00   4.7158901e+00
   2.1351239e+01  -2.1421479e+01   3.0000000e+02  -3.4535843e-01  -6.0917319e+00   5.1713762e+00
   2.1219132e+01  -2.1459490e+01   3.0000000e+02  -2.8247104e-01  -5.9390172e+00   5.6142212e+00
   2.1088435e+01  -2.1501611e+01   3.0000000e+02  -2.0402972e-01  -5.7580069e+00   6.0392258e+00
   2.0959295e+01  -2.1547796e+01   3.0000000e+02  -1.0990489e-01  -5.5518585e+00   6.4416052e+00
   2.0831855e+01  -2.1597994e+01   3.0000000e+02  -9.0391071e-05  -5.3243404e+00   6.8171608e+00
   2.0706257e+01  -2.1652149e+01   3.0000000e+02   1.2527703e-01  -5.0796318e+00   7.1623712e+00
   2.0582642e+01  -2.1710202e+01   3.0000000e+02   2.6589726e-01  -4.8221141e+00   7.4744382e+00
   2.0461148e+01  -2.1772087e+01   3.0000000e+02   4.2126858e-01  -4.5561705e+00   7.7512804e+00
   2.0341913e+01  -2.1837736e+01   3.0000000e+02   5.9067161e-01  -4.2860284e+00   7.9914803e+00
   2.0225072e+01  -2.1907076e+01   3.0000000e+02   7.7313873e-01  -4.0156277e+00   8.1942141e+00
   2.0110758e+01  -2.1980030e+01   3.0000000e+02   9.6744219e-01  -3.7485411e+00   8.3591619e+00
   1.9999101e+01  -2.2056517e+01   3.0000000e+02   1.1720915e+00  -3.4879288e+00   8.4864232e+00
   1.9890229e+01  -2.2136450e+01   3.0000000e+02   1.3853384e+00  -3.2365280e+00   8.5764380e+00
   1.9784268e+01  -2.2219741e+01   3.0000000e+02   1.6052133e+00  -2.9966626e+00   8.6299232e+00
   1.9681341e+01  -2.2306297e+01   3.0000000e+02   1.8295476e+00  -2.7702626e+00   8.6478251e+00
   1.9581569e+01  -2.2396020e+01   3.0000000e+02   2.0560147e+00  -2.5588936e+00   8.6312857e+00
   1.9485068e+01  -2.2488810e+01   3.0000000e+02   2.2821831e+00  -2.3637789e+00   8.5816184e+00
   1.9391954e+01  -2.2584563e+01   3.0000000e+02   2.5055603e+00  -2.1858376e+00   8.5002901e+00
   1.9302337e+01  -2.2683170e+01   3.0000000e+02   2.7236386e+00  -2.0256961e+00   8.3889162e+00
   1.9216325e+01  -2.2784521e+01   3.0000000e+02   2.9339556e+00  -1.8837231e+00   8.2492434e+00
   1.9134023e+01  -2.2888502e+01   3.0000000e+02   3.1341340e+00  -1.7600521e+00   8.0831439e+00
   1.9055532e+01  -2.2994993e+01   3.0000000e+02   3.3219240e+00  -1.6546036e+00   7.8926080e+00
   1.8980949e+01  -2.3103875e+01   3.0000000e+02   3.4952619e+00  -1.5671165e+00   7.6797145e+00
   1.8910369e+01  -2.3215024e+01   3.0000000e+02   3.6522965e+00  -1.4971775e+00   7.4466202e+00
   1.8843880e+01  -2.3328314e+01   3.0000000e+02   3.7914235e+00  -1.4442386e+00   7.1955288e+00
   1.8781568e+01  -2.3443614e+01   3.0000000e+02   3.9113061e+00  -1.4076479e+00   6.9286657e+00
   1.8723516e+01  -2.3560794e+01   3.0000000e+02   4.0108926e+00  -1.3866718e+00   6.6482281e+00
   1.8669801e+01  -2.3679719e+01   3.0000000e+02   4.0893996e+00  -1.3804957e+00   6.3563649e+00
   1.8620496e+01  -2.3800252e+01   3.0000000e+02   4.1462962e+00  -1.3882387e+00   6.0551356e+00
   1.8575669e+01  -2.3922254e+01   3.0000000e+02   4.1812678e+00  -1.4089564e+00   5.7464859e+00
   1.8535385e+01  -2.4045585e+01   3.0000000e+02   4.1941723e+00  -1.4416500e+00   5.4322319e+00
   1.8499702e+01  -2.4170102e+01   3.0000000e+02   4.1849885e+00  -1.4852593e+00   5.1140742e+00
   1.8468677e+01  -2.4295659e+01   3.0000000e+02   4.1537818e+00  -1.5386839e+00   4.7936169e+00
   1.8442357e+01  -2.4422112e+01   3.0000000e+02   4.1006718e+00  -1.6007778e+00   4.4723995e+00
   1.8420789e+01  -2.4549313e+01   3.0000000e+02   4.0258387e+00  -1.6703801e+00   4.1519511e+00
   1.8404011e+01  -2.4677111e+01   3.0000000e+02   3.9295404e+00  -1.7463095e+00   3.8338398e+00
   1.8392057e+01  -2.4805359e+01   3.0000000e+02   3.8121581e+00  -1.8273985e+00   3.5196800e+00
   1.8384957e+01  -2.4933903e+01   3.0000000e+02   3.6742634e+00  -1.9124970e+00   3.2111683e+00
   1.8382734e+01  -2.5062593e+01   3.0000000e+02   3.5166714e+00  -2.0004883e+00   2.9100394e+00
   1.8385406e+01  -2.5191276e+01   3.0000000e+02   3.3405029e+00  -2.0902985e+00   2.6180304e+00
   1.8392985e+01  -2.5319800e+01   3.0000000e+02   3.1472129e+00  -2.1809068e+00   2.3367973e+00
   1.8405478e+01  -2.5448010e+01   3.0000000e+02   2.9386013e+00  -2.2713535e+00   2.0678284e+00
   1.8422886e+01  -2.5575753e+01   3.0000000e+02   2.7167738e+00  -2.3607472e+00   1.8123346e+00
   1.8445204e+01  -2.5702876e+01   3.0000000e+02   2.4840782e+00  -2.4482668e+00   1.5711593e+00
   1.8472420e+01  -2.5829227e+01   3.0000000e+02   2.2430039e+00  -2.5331592e+00   1.3447016e+00
   1.8504519e+01  -2.5954652e+01   3.0000000e+02   1.9960652e+00  -2.6147403e+00   1.1328643e+00
   1.8541475e+01  -2.6078999e+01   3.0000000e+02   1.7456556e+00  -2.6923670e+00   9.3505120e-01
   1.8583262e+01  -2.6202117e+01   3.0000000e+02   1.4939115e+00  -2.7654384e+00   7.5018116e-01
   1.8629842e+01  -2.6323855e+01   3.0000000e+02   1.2425904e+00  -2.8333476e+00   5.7678743e-01
   1.8681175e+01  -2.6444066e+01   3.0000000e+02   9.9296620e-01  -2.8954731e+00   4.1311276e-01
   1.8737212e+01  -2.6562600e+01   3.0000000e+02   7.4579080e-01  -2.9511431e+00   2.5727505e-01
   1.8797900e+01  -2.6679312e+01   3.0000000e+02   5.0127316e-01  -2.9996258e+00   1.0741806e-01
   1.8863178e+01  -2.6794057e+01   3.0000000e+02   2.5914065e-01  -3.0401183e+00  -3.8112554e-02
   1.8932980e+01  -2.6906693e+01   3.0000000e+02   1.8732811e-02  -3.0717612e+00  -1.8062880e-01
   1.9007232e+01  -2.7017079e+01   3.0000000e+02  -2.2085196e-01  -3.0936615e+00  -3.2098112e-01
   1.9085856e+01  -2.7125079e+01   3.0000000e+02  -4.6059808e-01  -3.1049371e+00  -4.5950200e-01
   1.9168766e+01  -2.7230555e+01   3.0000000e+02  -7.0138287e-01  -3.1047689e+00  -5.9599154e-01
   1.9255870e+01  -2.7333376e+01   3.0000000e+02  -9.4382913e-01  -3.0924508e+00  -7.2976976e-01
   1.9347071e+01  -2.7433411e+01   3.0000000e+02  -1.1881605e+00  -3.0674452e+00  -8.5978485e-01
   1.9442266e+01  -2.7530535e+01   3.0000000e+02  -1.4341211e+00  -3.0294081e+00  -9.8475070e-01
   1.9541343e+01  -2.7624624e+01   3.0000000e+02  -1.6809291e+00  -2.9782005e+00  -1.1033079e+00
   1.9644189e+01  -2.7715557e+01   3.0000000e+02  -1.9273082e+00  -2.9138694e+00  -1.2142024e+00
   1.9750682e+01  -2.7803219e+01   3.0000000e+02  -2.1715552e+00  -2.8365887e+00  -1.3164012e+00
   1.9860694e+01  -2.7887498e+01   3.0000000e+02  -2.4116489e+00  -2.7465906e+00  -1.4091920e+00
   1.9974094e+01  -2.7968285e+01   3.0000000e+02  -2.6453847e+00  -2.6440793e+00  -1.4922202e+00
   2.0090744e+01  -2.8045476e+01   3.0000000e+02  -2.8705092e+00  -2.5291455e+00  -1.5654432e+00
   2.0210501e+01  -2.8118972e+01   3.0000000e+02  -3.0848436e+00  -2.4017026e+00  -1.6290421e+00
   2.0333216e+01  -2.8188677e+01   3.0000000e+02  -3.2863749e+00  -2.2614576e+00  -1.6832891e+00
   2.0458737e+01  -2.8254501e+01   3.0000000e+02  -3.4733245e+00  -2.1079136e+00  -1.7283917e+00
   2.0586908e+01  -2.8316358e+01   3.0000000e+02  -3.6441748e+00  -1.9404193e+00  -1.7643426e+00
   2.0717566e+01  -2.8374168e+01   3.0000000e+02  -3.7976738e+00  -1.7582518e+00  -1.7907826e+00
   2.0850545e+01  -2.8427855e+01   3.0000000e+02  -3.9328261e+00  -1.5607220e+00  -1.8069199e+00
   2.0985676e+01  -2.8477349e+01   3.0000000e+02  -4.0488816e+00  -1.3472916e+00  -1.8114773e+00
   2.1122786e+01  -2.8522585e+01   3.0000000e+02  -4.1453248e+00  -1.1176983e+00  -1.8026882e+00
   2.1261698e+01  -2.8563504e+01   3.0000000e+02  -4.2218783e+00  -8.7207713e-01  -1.7783307e+00
   2.1402232e+01  -2.8600051e+01   3.0000000e+02  -4.2785169e+00  -6.1107654e-01  -1.7358081e+00
   2.1544205e+01  -2.8632180e+01   3.0000000e+02  -4.3154937e+00  -3.3596536e-01  -1.6722464e+00
   2.1687434e+01  -2.8659846e+01   3.0000000e+02  -4.3333658e+00  -4.8725367e-02  -1.5846707e+00
   2.1831730e+01  -2.8683015e+01   3.0000000e+02  -4.3330240e+00   2.4786554e-01  -1.4701727e+00
   2.1976905e+01  -2.8701654e+01   3.0000000e+02  -4.3157089e+00   5.5021291e-01  -1.3261808e+00
   2.2122768e+01  -2.8715741e+01   3.0000000e+02  -4.2830171e+00   8.5392407e-01  -1.1507045e+00
   2.2871159e+01  -2.8845191e+01   3.0000000e+02  -3.8794858e+00   2.1373857e+00   5.1399772e-01
   2.3016710e+01  -2.8831814e+01   3.0000000e+02  -3.7873596e+00   2.3277720e+00   8.4652931e-01
   2.3161629e+01  -2.8814061e+01   3.0000000e+02  -3.6968320e+00   2.4857219e+00   1.1922063e+00
   2.3305737e+01  -2.8791954e+01   3.0000000e+02  -3.6102056e+00   2.6092844e+00   1.5443654e+00
   2.3448861e+01  -2.8765519e+01   3.0000000e+02  -3.5294354e+00   2.6978686e+00   1.8961302e+00
   2.3590824e+01  -2.8734790e+01   3.0000000e+02  -3.4560747e+00   2.7521981e+00   2.2407849e+00
   2.3731456e+01  -2.8699805e+01   3.0000000e+02  -3.3912501e+00   2.7741811e+00   2.5721481e+00
   2.3870586e+01  -2.8660605e+01   3.0000000e+02  -3.3356819e+00   2.7666909e+00   2.8848278e+00
   2.4008046e+01  -2.8617239e+01   3.0000000e+02  -3.2897166e+00   2.7332977e+00   3.1744249e+00
   2.4143671e+01  -2.8569760e+01   3.0000000e+02  -3.2533925e+00   2.6779921e+00   3.4376101e+00
   2.4277300e+01  -2.8518226e+01   3.0000000e+02  -3.2265089e+00   2.6049186e+00   3.6721194e+00
   2.4408774e+01  -2.8462700e+01   3.0000000e+02  -3.2086970e+00   2.5181518e+00   3.8766642e+00
   2.4537936e+01  -2.8403249e+01   3.0000000e+02  -3.1994847e+00   2.4215272e+00   4.0507917e+00
   2.4664636e+01  -2.8339946e+01   3.0000000e+02  -3.1983387e+00   2.3185208e+00   4.1947331e+00
   2.4788725e+01  -2.8272867e+01   3.0000000e+02  -3.2047108e+00   2.2122016e+00   4.3092137e+00
   2.4910059e+01  -2.8202094e+01   3.0000000e+02  -3.2180525e+00   2.1052147e+00   4.3953085e+00
   2.5028498e+01  -2.8127711e+01   3.0000000e+02  -3.2378364e+00   1.9998091e+00   4.4543019e+00
   2.5143907e+01  -2.8049808e+01   3.0000000e+02  -3.2635559e+00   1.8978745e+00   4.4875960e+00
   2.5256155e+01  -2.7968479e+01   3.0000000e+02  -3.2947346e+00   1.8009909e+00   4.4966372e+00
   2.5365115e+01  -2.7883822e+01   3.0000000e+02  -3.3309315e+00   1.7104688e+00   4.4828750e+00
   2.5470667e+01  -2.7795936e+01   3.0000000e+02  -3.3717495e+00   1.6273724e+00   4.4477351e+00
   2.5572694e+01  -2.7704927e+01   3.0000000e+02  -3.4168364e+00   1.5525293e+00   4.3926079e+00
   2.5671085e+01  -2.7610903e+01   3.0000000e+02  -3.4658928e+00   1.4865239e+00   4.3188231e+00
   2.5765733e+01  -2.7513975e+01   3.0000000e+02  -3.5186659e+00   1.4296833e+00   4.2276211e+00
   2.5856538e+01  -2.7414257e+01   3.0000000e+02  -3.5749270e+00   1.3820575e+00   4.1201196e+00
   2.5943405e+01  -2.7311868e+01   3.0000000e+02  -3.6344320e+00   1.3434129e+00   3.9972757e+00
   2.6026242e+01  -2.7206926e+01   3.0000000e+02  -3.6968753e+00   1.3132500e+00   3.8598388e+00
   2.6104966e+01  -2.7099554e+01   3.0000000e+02  -3.7618097e+00   1.2908188e+00   3.7083541e+00
   2.6179498e+01  -2.6989879e+01   3.0000000e+02  -3.8285834e+00   1.2751764e+00   3.5431710e+00
   2.6249764e+01  -2.6878026e+01   3.0000000e+02  -3.8962900e+00   1.2652531e+00   3.3644813e+00
   2.6315695e+01  -2.6764125e+01   3.0000000e+02  -3.9637316e+00   1.2599164e+00   3.1724141e+00
   2.6377231e+01  -2.6648309e+01   3.0000000e+02  -4.0294294e+00   1.2580351e+00   2.9671382e+00
   2.6434314e+01  -2.6530709e+01   3.0000000e+02  -4.0916838e+00   1.2585468e+00   2.7489508e+00
   2.6486893e+01  -2.6411461e+01   3.0000000e+02  -4.1486579e+00   1.2604882e+00   2.5183911e+00
   2.6534923e+01  -2.6290702e+01   3.0000000e+02  -4.1985014e+00   1.2630208e+00   2.2762925e+00
   2.6578363e+01  -2.6168567e+01   3.0000000e+02  -4.2394849e+00   1.2654401e+00   2.0237953e+00
   2.6617180e+01  -2.6045196e+01   3.0000000e+02  -4.2701216e+00   1.2671596e+00   1.7623459e+00
   2.6651344e+01  -2.5920729e+01   3.0000000e+02  -4.2892773e+00   1.2676984e+00   1.4936185e+00
   2.6680833e+01  -2.5795305e+01   3.0000000e+02  -4.2962403e+00   1.2666491e+00   1.2194271e+00
   2.6705628e+01  -2.5669065e+01   3.0000000e+02  -4.2907540e+00   1.2636497e+00   9.4161851e-01
   2.6725717e+01  -2.5542152e+01   3.0000000e+02  -4.2730085e+00   1.2583459e+00   6.6196261e-01
   2.6741092e+01  -2.5414705e+01   3.0000000e+02  -4.2435903e+00   1.2503581e+00   3.8202648e-01
   2.6751752e+01  -2.5286867e+01   3.0000000e+02  -4.2034002e+00   1.2392433e+00   1.0310501e-01
   2.6757700e+01  -2.5158780e+01   3.0000000e+02  -4.1535394e+00   1.2244656e+00  -1.7386083e-01
   2.6758944e+01  -2.5030584e+01   3.0000000e+02  -4.0951754e+00   1.2053667e+00  -4.4831654e-01
   2.6755498e+01  -2.4902422e+01   3.0000000e+02  -4.0294019e+00   1.1811449e+00  -7.2007167e-01
   2.6747379e+01  -2.4774434e+01   3.0000000e+02  -3.9570982e+00   1.1508457e+00  -9.8925937e-01
   2.6734612e+01  -2.4646759e+01   3.0000000e+02  -3.8788153e+00   1.1133630e+00  -1.2562217e+00
   2.6717224e+01  -2.4519538e+01   3.0000000e+02  -3.7946984e+00   1.0674628e+00  -1.5213680e+00
   2.6695248e+01  -2.4392908e+01   3.0000000e+02  -3.7044612e+00   1.0118195e+00  -1.7850126e+00
   2.6668722e+01  -2.4267007e+01   3.0000000e+02  -3.6074249e+00   9.4507718e-01  -2.0471940e+00
   2.6637687e+01  -2.4141970e+01   3.0000000e+02  -3.5026142e+00   8.6592268e-01  -2.3075332e+00
   2.6602190e+01  -2.4017934e+01   3.0000000e+02  -3.3889103e+00   7.7317314e-01  -2.5651153e+00
   2.6562281e+01  -2.3895031e+01   3.0000000e+02  -3.2652244e+00   6.6585604e-01  -2.8184639e+00
   2.6518015e+01  -2.3773393e+01   3.0000000e+02  -3.1306832e+00   5.4328632e-01  -3.0655615e+00
   2.6469452e+01  -2.3653150e+01   3.0000000e+02  -2.9847837e+00   4.0511875e-01  -3.3039522e+00
   2.6416655e+01  -2.3534430e+01   3.0000000e+02  -2.8274960e+00   2.5137361e-01  -3.5308928e+00
   2.6359690e+01  -2.3417361e+01   3.0000000e+02  -2.6593048e+00   8.2436389e-02  -3.7435227e+00
   2.6298630e+01  -2.3302065e+01   3.0000000e+02  -2.4811839e+00  -1.0097428e-01  -3.9390328e+00
   2.6233547e+01  -2.3188666e+01   3.0000000e+02  -2.2945164e+00  -2.9784490e-01  -4.1147975e+00
   2.6164521e+01  -2.3077283e+01   3.0000000e+02  -2.1009917e+00  -5.0692038e-01  -4.2684628e+00
   2.6091634e+01  -2.2968034e+01   3.0000000e+02  -1.9024879e+00  -7.2674837e-01  -4.3979881e+00
   2.6014971e+01  -2.2861034e+01   3.0000000e+02  -1.7009744e+00  -9.5571761e-01  -4.5016511e+00
   2.5934621e+01  -2.2756394e+01   3.0000000e+02  -1.4984443e+00  -1.1920821e+00  -4.5780327e+00
   2.5850676e+01  -2.2654226e+01   3.0000000e+02  -1.2968838e+00  -1.4339677e+00  -4.6260004e+00
   2.5763230e+01  -2.2554635e+01   3.0000000e+02  -1.0982563e+00  -1.6793955e+00  -4.6447134e+00
   2.5672383e+01  -2.2457726e+01   3.0000000e+02  -9.0452367e-01  -1.9262789e+00  -4.6336431e+00
   2.5578234e+01  -2.2363601e+01   3.0000000e+02  -7.1764572e-01  -2.1724602e+00  -4.5926209e+00
   2.5480888e+01  -2.2272356e+01   3.0000000e+02  -5.3959198e-01  -2.4157454e+00  -4.5218979e+00
   2.5380451e+01  -2.2184087e+01   3.0000000e+02  -3.7232647e-01  -2.6539593e+00  -4.4222056e+00
   2.5277033e+01  -2.2098885e+01   3.0000000e+02  -2.1777681e-01  -2.8850240e+00  -4.2948067e+00
   2.5170746e+01  -2.2016839e+01   3.0000000e+02  -7.7783386e-02  -3.1070486e+00  -4.1415185e+00
   2.5061703e+01  -2.1938034e+01   3.0000000e+02   4.5967018e-02  -3.3184329e+00  -3.9646999e+00
   2.4950021e+01  -2.1862551e+01   3.0000000e+02   1.5201150e-01  -3.5179664e+00  -3.7671995e+00
   2.4835818e+01  -2.1790468e+01   3.0000000e+02   2.3918971e-01  -3.7049248e+00  -3.5522510e+00
   2.4719216e+01  -2.1721859e+01   3.0000000e+02   3.0671251e-01  -3.8791407e+00  -3.3233287e+00
   2.4600336e+01  -2.1656796e+01   3.0000000e+02   3.5422356e-01  -4.0410480e+00  -3.0839543e+00
   2.4479304e+01  -2.1595345e+01   3.0000000e+02   3.8183332e-01  -4.1916726e+00  -2.8374886e+00
   2.4356246e+01  -2.1537569e+01   3.0000000e+02   3.9013478e-01  -4.3325775e+00  -2.5869045e+00
   2.4231289e+01  -2.1483527e+01   3.0000000e+02   3.8018669e-01  -4.4657503e+00  -2.3345807e+00
   2.4104564e+01  -2.1433276e+01   3.0000000e+02   3.5347141e-01  -4.5934407e+00  -2.0821401e+00
   2.3976201e+01  -2.1386867e+01   3.0000000e+02   3.1182662e-01  -4.7179715e+00  -1.8303273e+00
   2.3846332e+01  -2.1344346e+01   3.0000000e+02   2.5736106e-01  -4.8415264e+00  -1.5789764e+00
   2.3715091e+01  -2.1305759e+01   3.0000000e+02   1.9236738e-01  -4.9659480e+00  -1.3270484e+00
   2.3582613e+01  -2.1271144e+01   3.0000000e+02   1.1922477e-01  -5.0925601e+00  -1.0727313e+00
   2.3449032e+01  -2.1240537e+01   3.0000000e+02   4.0319950e-02  -5.2220338e+00  -8.1360173e-01
   2.3314487e+01  -2.1213968e+01   3.0000000e+02  -4.2023884e-02  -5.3542932e+00  -5.4683776e-01
   2.3179113e+01  -2.1191466e+01   3.0000000e+02  -1.2559866e-01  -5.4884910e+00  -2.6942631e-01
   2.3043048e+01  -2.1173053e+01   3.0000000e+02  -2.0835166e-01  -5.6230133e+00   2.1594561e-02
   2.2906432e+01  -2.1158749e+01   3.0000000e+02  -2.8840132e-01  -5.7555423e+00   3.2891736e-01
   2.2769404e+01  -2.1148566e+01   3.0000000e+02  -3.6405316e-01  -5.8831532e+00   6.5477021e-01
   2.2632101e+01  -2.1142517e+01   3.0000000e+02  -4.3378632e-01  -6.0024475e+00   1.0007524e+00
   2.2494664e+01  -2.1140607e+01   3.0000000e+02  -4.9625080e-01  -6.1096945e+00   1.3676782e+00
   2.2357233e+01  -2.1142839e+01   3.0000000e+02  -5.5024685e-01  -6.2010092e+00   1.7554926e+00
   2.2219947e+01  -2.1149209e+01   3.0000000e+02  -5.9471414e-01  -6.2725326e+00   2.1632110e+00
   2.2082945e+01  -2.1159712e+01   3.0000000e+02  -6.2870655e-01  -6.3206216e+00   2.5889070e+00
   2.1946367e+01  -2.1174336e+01   3.0000000e+02  -6.5138581e-01  -6.3420349e+00   3.0297377e+00
   2.1810352e+01  -2.1193067e+01   3.0000000e+02  -6.6200427e-01  -6.3341151e+00   3.4820334e+00
   2.1675037e+01  -2.1215886e+01   3.0000000e+02  -6.5990166e-01  -6.2949457e+00   3.9414249e+00
   2.1540561e+01  -2.1242768e+01   3.0000000e+02  -6.4450104e-01  -6.2234794e+00   4.4029984e+00
   2.1407062e+01  -2.1273688e+01   3.0000000e+02  -6.1529674e-01  -6.1196237e+00   4.8615133e+00
   2.1274674e+01  -2.1308613e+01   3.0000000e+02  -5.7186614e-01  -5.9842614e+00   5.3116282e+00
   2.1143535e+01  -2.1347507e+01   3.0000000e+02  -5.1385996e-01  -5.8192256e+00   5.7481068e+00
   2.1013778e+01  -2.1390331e+01   3.0000000e+02  -4.4100563e-01  -5.6271928e+00   6.1660574e+00
   2.0885538e+01  -2.1437040e+01   3.0000000e+02  -3.5311924e-01  -5.4115400e+00   6.5610841e+00
   2.0758945e+01  -2.1487588e+01   3.0000000e+02  -2.5010940e-01  -5.1761435e+00   6.9294367e+00
   2.0634131e+01  -2.1541921e+01   3.0000000e+02  -1.3201209e-01  -4.9251815e+00   7.2680544e+00
   2.0511225e+01  -2.1599984e+01   3.0000000e+02   9.9615588e-04  -4.6629208e+00   7.5745965e+00
   2.0390356e+01  -2.1661718e+01   3.0000000e+02   1.4856042e-01  -4.3935410e+00   7.8473973e+00
   2.0271649e+01  -2.1727059e+01   3.0000000e+02   3.1011289e-01  -4.1209810e+00   8.0854029e+00
   2.0155228e+01  -2.1795940e+01   3.0000000e+02   4.8485060e-01  -3.8488459e+00   8.2880767e+00
   2.0041217e+01  -2.1868290e+01   3.0000000e+02   6.7171565e-01  -3.5803525e+00   8.4553041e+00
   1.9929736e+01  -2.1944034e+01   3.0000000e+02   8.6939083e-01  -3.3183011e+00   8.5873127e+00
   1.9820903e+01  -2.2023094e+01   3.0000000e+02   1.0763118e+00  -3.0650878e+00   8.6845950e+00
   1.9714834e+01  -2.2105388e+01   3.0000000e+02   1.2906875e+00  -2.8227307e+00   8.7478514e+00
   1.9611643e+01  -2.2190831e+01   3.0000000e+02   1.5105355e+00  -2.5929029e+00   8.7779491e+00
   1.9511443e+01  -2.2279334e+01   3.0000000e+02   1.7337202e+00  -2.3769700e+00   8.7758942e+00
   1.9414341e+01  -2.2370806e+01   3.0000000e+02   1.9580007e+00  -2.1760103e+00   8.7428157e+00
   1.9320445e+01  -2.2465151e+01   3.0000000e+02   2.1810680e+00  -1.9908584e+00   8.6799529e+00
   1.9229858e+01  -2.2562272e+01   3.0000000e+02   2.4005971e+00  -1.8221157e+00   8.5886491e+00
   1.9142681e+01  -2.2662066e+01   3.0000000e+02   2.6142764e+00  -1.6701764e+00   8.4703524e+00
   1.9059011e+01  -2.2764431e+01   3.0000000e+02   2.8198627e+00  -1.5352457e+00   8.3266044e+00
   1.8978944e+01  -2.2869257e+01   3.0000000e+02   3.0151980e+00  -1.4173627e+00   8.1590496e+00
   1.8902571e+01  -2.2976436e+01   3.0000000e+02   3.1982671e+00  -1.3164168e+00   7.9694162e+00
   1.8829981e+01  -2.3085855e+01   3.0000000e+02   3.3672165e+00  -1.2321722e+00   7.7595188e+00
   1.8761258e+01  -2.3197399e+01   3.0000000e+02   3.5203911e+00  -1.1642836e+00   7.5312426e+00
   1.8696485e+01  -2.3310949e+01   3.0000000e+02   3.6563600e+00  -1.1123196e+00   7.2865301e+00
   1.8635740e+01  -2.3426387e+01   3.0000000e+02   3.7739422e+00  -1.0757717e+00   7.0273465e+00
   1.8579096e+01  -2.3543589e+01   3.0000000e+02   3.8722047e+00  -1.0540554e+00   6.7556676e+00
   1.8526625e+01  -2.3662432e+01   3.0000000e+02   3.9504710e+00  -1.0465279e+00   6.4734283e+00
   1.8478394e+01  -2.3782787e+01   3.0000000e+02   4.0082905e+00  -1.0524722e+00   6.1825092e+00
   1.8434464e+01  -2.3904529e+01   3.0000000e+02   4.0454132e+00  -1.0711021e+00   5.8846843e+00
   1.8394896e+01  -2.4027524e+01   3.0000000e+02   4.0617400e+00  -1.1015629e+00   5.5816375e+00
   1.8359743e+01  -2.4151643e+01   3.0000000e+02   4.0572773e+00  -1.1429300e+00   5.2749316e+00
   1.8329057e+01  -2.4276751e+01   3.0000000e+02   4.0320961e+00  -1.1942216e+00   4.9660528e+00
   1.8302882e+01  -2.4402714e+01   3.0000000e+02   3.9863019e+00  -1.2544009e+00   4.6564327e+00
   1.8281261e+01  -2.4529395e+01   3.0000000e+02   3.9200356e+00  -1.3224036e+00   4.3474982e+00
   1.8264231e+01  -2.4656656e+01   3.0000000e+02   3.8334915e+00  -1.3971442e+00   4.0407140e+00
   1.8251824e+01  -2.4784360e+01   3.0000000e+02   3.7269599e+00  -1.4775358e+00   3.7376085e+00
   1.8244067e+01  -2.4912367e+01   3.0000000e+02   3.6008903e+00  -1.5625003e+00   3.4397955e+00
   1.8240985e+01  -2.5040537e+01   3.0000000e+02   3.4559570e+00  -1.6509895e+00   3.1489455e+00
   1.8242593e+01  -2.5168729e+01   3.0000000e+02   3.2931129e+00  -1.7419749e+00   2.8667516e+00
   1.8248907e+01  -2.5296802e+01   3.0000000e+02   3.1136348e+00  -1.8344826e+00   2.5948428e+00
   1.8259933e+01  -2.5424615e+01   3.0000000e+02   2.9191282e+00  -1.9275750e+00   2.3347082e+00
   1.8275674e+01  -2.5552025e+01   3.0000000e+02   2.7115136e+00  -2.0203736e+00   2.0875956e+00
   1.8296128e+01  -2.5678892e+01   3.0000000e+02   2.4929621e+00  -2.1120629e+00   1.8544110e+00
   1.8321288e+01  -2.5805073e+01   3.0000000e+02   2.2658190e+00  -2.2018915e+00   1.6356514e+00
   1.8351141e+01  -2.5930428e+01   3.0000000e+02   2.0324819e+00  -2.2891711e+00   1.4313437e+00
   1.8385667e+01  -2.6054815e+01   3.0000000e+02   1.7952828e+00  -2.3732665e+00   1.2410339e+00
   1.8424844e+01  -2.6178095e+01   3.0000000e+02   1.5563466e+00  -2.4535941e+00   1.0637913e+00
   1.8468642e+01  -2.6300127e+01   3.0000000e+02   1.3174763e+00  -2.5295883e+00   8.9828333e-01
   1.8517026e+01  -2.6420775e+01   3.0000000e+02   1.0800366e+00  -2.6006847e+00   7.4286240e-01
   1.8569957e+01  -2.6539900e+01   3.0000000e+02   8.4490051e-01  -2.6662982e+00   5.9569899e-01
   1.8627387e+01  -2.6657366e+01   3.0000000e+02   6.1241292e-01  -2.7257923e+00   4.5493659e-01
   1.8689266e+01  -2.6773038e+01   3.0000000e+02   3.8241627e-01  -2.7784802e+00   3.1883648e-01
   1.8755537e+01  -2.6886784e+01   3.0000000e+02   1.5432024e-01  -2.8236134e+00   1.8593395e-01
   1.8826136e+01  -2.6998473e+01   3.0000000e+02  -7.2778907e-02  -2.8603966e+00   5.5161525e-02
   1.8900996e+01  -2.7107974e+01   3.0000000e+02  -2.9995158e-01  -2.8880223e+00  -7.4075329e-02
   1.8980042e+01  -2.7215161e+01   3.0000000e+02  -5.2827514e-01  -2.9057006e+00  -2.0185115e-01
   1.9063196e+01  -2.7319909e+01   3.0000000e+02  -7.5866470e-01  -2.9127170e+00  -3.2774719e-01
   1.9150371e+01  -2.7422096e+01   3.0000000e+02  -9.9172270e-01  -2.9084732e+00  -4.5090718e-01
   1.9241478e+01  -2.7521601e+01   3.0000000e+02  -1.2276245e+00  -2.8925407e+00  -5.7016652e-01
   1.9336421e+01  -2.7618308e+01   3.0000000e+02  -1.4660480e+00  -2.8646783e+00  -6.8418610e-01
   1.9435097e+01  -2.7712102e+01   3.0000000e+02  -1.7061463e+00  -2.8248423e+00  -7.9161681e-01
   1.9537402e+01  -2.7802872e+01   3.0000000e+02  -1.9465898e+00  -2.7731644e+00  -8.9126590e-01
   1.9643223e+01  -2.7890511e+01   3.0000000e+02  -2.1856361e+00  -2.7098968e+00  -9.8221045e-01
   1.9752443e+01  -2.7974914e+01   3.0000000e+02  -2.4212448e+00  -2.6353447e+00  -1.0638952e+00
   1.9864941e+01  -2.8055980e+01   3.0000000e+02  -2.6512129e+00  -2.5497798e+00  -1.1361580e+00
   1.9980590e+01  -2.8133613e+01   3.0000000e+02  -2.8733065e+00  -2.4533538e+00  -1.1991903e+00
   2.0099259e+01  -2.8207718e+01   3.0000000e+02  -3.0853755e+00  -2.3460358e+00  -1.2534580e+00
   2.0220812e+01  -2.8278208e+01   3.0000000e+02  -3.2854515e+00  -2.2275629e+00  -1.2995540e+00
   2.0345108e+01  -2.8344997e+01   3.0000000e+02  -3.4717953e+00  -2.0974444e+00  -1.3380571e+00
   2.0472005e+01  -2.8408004e+01   3.0000000e+02  -3.6429283e+00  -1.9549870e+00  -1.3693744e+00
   2.0601352e+01  -2.8467152e+01   3.0000000e+02  -3.7976199e+00  -1.7993670e+00  -1.3935947e+00
   2.0732999e+01  -2.8522371e+01   3.0000000e+02  -3.9348778e+00  -1.6297132e+00  -1.4103898e+00
   2.0866788e+01  -2.8573592e+01   3.0000000e+02  -4.0539097e+00  -1.4452248e+00  -1.4189529e+00
   2.1002562e+01  -2.8620753e+01   3.0000000e+02  -4.1541133e+00  -1.2452704e+00  -1.4179679e+00
   2.1140158e+01  -2.8663798e+01   3.0000000e+02  -4.2350614e+00  -1.0295089e+00  -1.4056130e+00
   2.1279410e+01  -2.8702672e+01   3.0000000e+02  -4.2965071e+00  -7.9799876e-01  -1.3796214e+00
   2.1420151e+01  -2.8737329e+01   3.0000000e+02  -4.3384098e+00  -5.5129826e-01  -1.3373327e+00
   2.1562211e+01  -2.8767726e+01   3.0000000e+02  -4.3609630e+00  -2.9057487e-01  -1.2758151e+00
   2.1705417e+01  -2.8793825e+01   3.0000000e+02  -4.3646341e+00  -1.7699470e-02  -1.1920068e+00
   2.1849595e+01  -2.8815595e+01   3.0000000e+02  -4.3502028e+00   2.6468247e-01  -1.0829012e+00
   2.1994569e+01  -2.8833009e+01   3.0000000e+02  -4.3187910e+00   5.5311275e-01  -9.4579029e-01
   2.2140162e+01  -2.8846046e+01   3.0000000e+02  -4.2718806e+00   8.4334499e-01  -7.7852578e-01
   2.2286196e+01  -2.8854688e+01   3.0000000e+02  -4.2113112e+00   1.1304460e+00  -5.7980614e-01
   2.2432492e+01  -2.8858927e+01   3.0000000e+02  -4.1392528e+00   1.4089797e+00  -3.4941426e-01
   2.2578871e+01  -2.8858755e+01   3.0000000e+02  -4.0581528e+00   1.6732825e+00  -8.8439203e-02
   2.2725153e+01  -2.8854175e+01   3.0000000e+02  -3.9706525e+00   1.9177865e+00   2.0064917e-01
   2.3482750e+01  -2.8890663e+01   3.0000000e+02  -3.3646413e+00   2.5952038e+00   2.2062327e+00
   2.3625094e+01  -2.8859884e+01   3.0000000e+02  -3.2783728e+00   2.6404373e+00   2.5425877e+00
   2.3766142e+01  -2.8824969e+01   3.0000000e+02  -3.2015766e+00   2.6537898e+00   2.8663517e+00
   2.3905735e+01  -2.8785956e+01   3.0000000e+02  -3.1350915e+00   2.6380959e+00   3.1722290e+00
   2.4043712e+01  -2.8742890e+01   3.0000000e+02  -3.0793554e+00   2.5968884e+00   3.4558718e+00
   2.4179920e+01  -2.8695823e+01   3.0000000e+02  -3.0344550e+00   2.5341191e+00   3.7139952e+00
   2.4314203e+01  -2.8644807e+01   3.0000000e+02  -3.0002167e+00   2.4539115e+00   3.9443376e+00
   2.4446412e+01  -2.8589902e+01   3.0000000e+02  -2.9762582e+00   2.3603208e+00   4.1456193e+00
   2.4576399e+01  -2.8531171e+01   3.0000000e+02  -2.9620680e+00   2.2571715e+00   4.3173887e+00
   2.4704021e+01  -2.8468680e+01   3.0000000e+02  -2.9570568e+00   2.1479383e+00   4.4598684e+00
   2.4829135e+01  -2.8402501e+01   3.0000000e+02  -2.9605987e+00   2.0356918e+00   4.5737814e+00
   2.4951607e+01  -2.8332709e+01   3.0000000e+02  -2.9720566e+00   1.9230782e+00   4.6602044e+00
   2.5071302e+01  -2.8259385e+01   3.0000000e+02  -2.9908049e+00   1.8123550e+00   4.7204234e+00
   2.5188091e+01  -2.8182611e+01   3.0000000e+02  -3.0162438e+00   1.7054300e+00   4.7558377e+00
   2.5301850e+01  -2.8102474e+01   3.0000000e+02  -3.0478024e+00   1.6039098e+00   4.7678953e+00
   2.5412458e+01  -2.8019064e+01   3.0000000e+02  -3.0849531e+00   1.5091491e+00   4.7580473e+00
   2.5519799e+01  -2.7932477e+01   3.0000000e+02  -3.1272169e+00   1.4222748e+00   4.7277341e+00
   2.5623761e+01  -2.7842807e+01   3.0000000e+02  -3.1741881e+00   1.3442067e+00   4.6783593e+00
   2.5724237e+01  -2.7750157e+01   3.0000000e+02  -3.2255283e+00   1.2756375e+00   4.6112937e+00
   2.5821125e+01  -2.7654630e+01   3.0000000e+02  -3.2809838e+00   1.2170210e+00   4.5278359e+00
   2.5914327e+01  -2.7556331e+01   3.0000000e+02  -3.3403741e+00   1.1685451e+00   4.4291772e+00
   2.6003751e+01  -2.7455370e+01   3.0000000e+02  -3.4035591e+00   1.1301055e+00   4.3163597e+00
   2.6089309e+01  -2.7351859e+01   3.0000000e+02  -3.4703953e+00   1.1013051e+00   4.1902195e+00
   2.6170918e+01  -2.7245912e+01   3.0000000e+02  -3.5406671e+00   1.0814666e+00   4.0513483e+00
   2.6248502e+01  -2.7137645e+01   3.0000000e+02  -3.6140044e+00   1.0696685e+00   3.9000811e+00
   2.6321987e+01  -2.7027176e+01   3.0000000e+02  -3.6898068e+00   1.0648097e+00   3.7365137e+00
   2.6391306e+01  -2.6914627e+01   3.0000000e+02  -3.7671747e+00   1.0656737e+00   3.5605710e+00
   2.6456397e+01  -2.6800120e+01   3.0000000e+02  -3.8448837e+00   1.0710098e+00   3.3720937e+00
   2.6517203e+01  -2.6683778e+01   3.0000000e+02  -3.9213944e+00   1.0796031e+00   3.1709577e+00
   2.6573672e+01  -2.6565729e+01   3.0000000e+02  -3.9949058e+00   1.0903284e+00   2.9572038e+00
   2.6625757e+01  -2.6446098e+01   3.0000000e+02  -4.0634619e+00   1.1021943e+00   2.7311258e+00
   2.6673417e+01  -2.6325015e+01   3.0000000e+02  -4.1250729e+00   1.1143566e+00   2.4933610e+00
   2.6716615e+01  -2.6202608e+01   3.0000000e+02  -4.1778637e+00   1.1261260e+00   2.2449002e+00
   2.6755319e+01  -2.6079009e+01   3.0000000e+02  -4.2202053e+00   1.1369516e+00   1.9870850e+00
   2.6789504e+01  -2.5954348e+01   3.0000000e+02  -4.2508315e+00   1.1463975e+00   1.7215353e+00
   2.6819147e+01  -2.5828758e+01   3.0000000e+02  -4.2689195e+00   1.1541148e+00   1.4500638e+00
   2.6844232e+01  -2.5702371e+01   3.0000000e+02  -4.2741300e+00   1.1598036e+00   1.1745592e+00
   2.6864748e+01  -2.5575320e+01   3.0000000e+02  -4.2666066e+00   1.1631763e+00   8.9686841e-01
   2.6880688e+01  -2.5447738e+01   3.0000000e+02  -4.2469335e+00   1.1639218e+00   6.1867584e-01
   2.6892049e+01  -2.5319759e+01   3.0000000e+02  -4.2160586e+00   1.1616696e+00   3.4140110e-01
   2.6898836e+01  -2.5191515e+01   3.0000000e+02  -4.1751831e+00   1.1559550e+00   6.6114654e-02
   2.6901055e+01  -2.5063141e+01   3.0000000e+02  -4.1256311e+00   1.1461962e+00  -2.0651023e-01
   2.6898718e+01  -2.4934768e+01   3.0000000e+02  -4.0686999e+00   1.1316706e+00  -4.7621901e-01
   2.6891843e+01  -2.4806529e+01   3.0000000e+02  -4.0055147e+00   1.1115044e+00  -7.4312862e-01
   2.6880449e+01  -2.4678557e+01   3.0000000e+02  -3.9368929e+00   1.0846745e+00  -1.0076558e+00
   2.6864563e+01  -2.4550981e+01   3.0000000e+02  -3.8632397e+00   1.0500202e+00  -1.2703879e+00
   2.6844215e+01  -2.4423934e+01   3.0000000e+02  -3.7844949e+00   1.0062795e+00  -1.5319105e+00
   2.6819438e+01  -2.4297543e+01   3.0000000e+02  -3.7001308e+00   9.5213503e-01  -1.7926464e+00
   2.6790271e+01  -2.4171938e+01   3.0000000e+02  -3.6092252e+00   8.8628447e-01  -2.0526606e+00
   2.6756755e+01  -2.4047245e+01   3.0000000e+02  -3.5105829e+00   8.0751612e-01  -2.3115369e+00
   2.6718937e+01  -2.3923592e+01   3.0000000e+02  -3.4029136e+00   7.1479514e-01  -2.5682761e+00
   2.6676867e+01  -2.3801102e+01   3.0000000e+02  -3.2850172e+00   6.0733591e-01  -2.8212970e+00
   2.6630600e+01  -2.3679898e+01   3.0000000e+02  -3.1559718e+00   4.8466572e-01  -3.0684848e+00
   2.6580191e+01  -2.3560103e+01   3.0000000e+02  -3.0152743e+00   3.4665959e-01  -3.3073209e+00
   2.6525703e+01  -2.3441835e+01   3.0000000e+02  -2.8629289e+00   1.9354400e-01  -3.5350436e+00
   2.6467201e+01  -2.3325214e+01   3.0000000e+02  -2.6994652e+00   2.5881612e-02  -3.7488208e+00
   2.6404752e+01  -2.3210354e+01   3.0000000e+02  -2.5258842e+00  -1.5548017e-01  -3.9459164e+00
   2.6338428e+01  -2.3097370e+01   3.0000000e+02  -2.3435757e+00  -3.4945230e-01  -4.1237926e+00
   2.6268304e+01  -2.2986375e+01   3.0000000e+02  -2.1542000e+00  -5.5476040e-01  -4.2801820e+00
   2.6194458e+01  -2.2877477e+01   3.0000000e+02  -1.9595747e+00  -7.6999144e-01  -4.4131088e+00
   2.6116972e+01  -2.2770784e+01   3.0000000e+02  -1.7615942e+00  -9.9361286e-01  -4.5208709e+00
   2.6035928e+01  -2.2666402e+01   3.0000000e+02  -1.5621687e+00  -1.2239898e+00  -4.6020213e+00
   2.5951415e+01  -2.2564433e+01   3.0000000e+02  -1.3632110e+00  -1.4593816e+00  -4.6553528e+00
   2.5863521e+01  -2.2464976e+01   3.0000000e+02  -1.1666310e+00  -1.6979434e+00  -4.6799077e+00
   2.5772340e+01  -2.2368131e+01   3.0000000e+02  -9.7436261e-01  -1.9377141e+00  -4.6750126e+00
   2.5677967e+01  -2.2273990e+01   3.0000000e+02  -7.8836385e-01  -2.1766474e+00  -4.6403407e+00
   2.5580500e+01  -2.2182646e+01   3.0000000e+02  -6.1062772e-01  -2.4126278e+00  -4.5759833e+00
   2.5480038e+01  -2.2094189e+01   3.0000000e+02  -4.4315995e-01  -2.6435299e+00  -4.4825238e+00
   2.5376684e+01  -2.2008704e+01   3.0000000e+02  -2.8794571e-01  -2.8672893e+00  -4.3610989e+00
   2.5270544e+01  -2.1926274e+01   3.0000000e+02  -1.4689612e-01  -3.0819884e+00  -4.2134332e+00
   2.5161723e+01  -2.1846979e+01   3.0000000e+02  -2.1776383e-02  -3.2859646e+00  -4.0418331e+00
   2.5050331e+01  -2.1770896e+01   3.0000000e+02   8.5863536e-02  -3.4779100e+00  -3.8491486e+00
   2.4936480e+01  -2.1698100e+01   3.0000000e+02   1.7476962e-01  -3.6569774e+00  -3.6386787e+00
   2.4820282e+01  -2.1628659e+01   3.0000000e+02   2.4405768e-01  -3.8228724e+00  -3.4140254e+00
   2.4701851e+01  -2.1562642e+01   3.0000000e+02   2.9327069e-01  -3.9759037e+00  -3.1789183e+00
   2.4581305e+01  -2.1500112e+01   3.0000000e+02   3.2241991e-01  -4.1170013e+00  -2.9369987e+00
   2.4458761e+01  -2.1441130e+01   3.0000000e+02   3.3200319e-01  -4.2476846e+00  -2.6915833e+00
   2.4334339e+01  -2.1385751e+01   3.0000000e+02   3.2298985e-01  -4.3699676e+00  -2.4454443e+00
   2.4208160e+01  -2.1334030e+01   3.0000000e+02   2.9678254e-01  -4.4862169e+00  -2.2006154e+00
   2.4080347e+01  -2.1286017e+01   3.0000000e+02   2.5514941e-01  -4.5989663e+00  -1.9582483e+00
   2.3951023e+01  -2.1241756e+01   3.0000000e+02   2.0013752e-01  -4.7107076e+00  -1.7185354e+00
   2.3820312e+01  -2.1201292e+01   3.0000000e+02   1.3398280e-01  -4.8236786e+00  -1.4807175e+00
   2.3688341e+01  -2.1164662e+01   3.0000000e+02   5.9009404e-02  -4.9396624e+00  -1.2431604e+00
   2.3555235e+01  -2.1131903e+01   3.0000000e+02  -2.2452920e-02  -5.0598335e+00  -1.0034914e+00
   2.3421124e+01  -2.1103045e+01   3.0000000e+02  -1.0814515e-01  -5.1846332e+00  -7.5880002e-01
   2.3286135e+01  -2.1078115e+01   3.0000000e+02  -1.9593415e-01  -5.3137150e+00  -5.0584717e-01
   2.3150396e+01  -2.1057139e+01   3.0000000e+02  -2.8384563e-01  -5.4459304e+00  -2.4130387e-01
   2.3014039e+01  -2.1040136e+01   3.0000000e+02  -3.7008774e-01  -5.5793574e+00   3.8010712e-02
   2.2877192e+01  -2.1027122e+01   3.0000000e+02  -4.5305539e-01  -5.7113874e+00   3.3493069e-01
   2.2739985e+01  -2.1018110e+01   3.0000000e+02  -5.3131970e-01  -5.8388295e+00   6.5174197e-01
   2.2602551e+01  -2.1013108e+01   3.0000000e+02  -6.0361400e-01  -5.9580459e+00   9.9001852e-01
   2.2465019e+01  -2.1012121e+01   3.0000000e+02  -6.6881468e-01  -6.0651185e+00   1.3505171e+00
   2.2327520e+01  -2.1015150e+01   3.0000000e+02  -7.2591737e-01  -6.1560159e+00   1.7330786e+00
   2.2190185e+01  -2.1022193e+01   3.0000000e+02  -7.7401614e-01  -6.2267794e+00   2.1365907e+00
   2.2053146e+01  -2.1033242e+01   3.0000000e+02  -8.1228982e-01  -6.2737085e+00   2.5589827e+00
   2.1916531e+01  -2.1048287e+01   3.0000000e+02  -8.3998663e-01  -6.2935488e+00   2.9972903e+00
   2.1780472e+01  -2.1067314e+01   3.0000000e+02  -8.5641600e-01  -6.2836628e+00   3.4477206e+00
   2.1645099e+01  -2.1090304e+01   3.0000000e+02  -8.6094880e-01  -6.2421852e+00   3.9058048e+00
   2.1510540e+01  -2.1117235e+01   3.0000000e+02  -8.5301314e-01  -6.1681422e+00   4.3665769e+00
   2.1376925e+01  -2.1148081e+01   3.0000000e+02  -8.3209437e-01  -6.0615291e+00   4.8247682e+00
   2.1244380e+01  -2.1182813e+01   3.0000000e+02  -7.9773415e-01  -5.9233253e+00   5.2750548e+00
   2.1113034e+01  -2.1221398e+01   3.0000000e+02  -7.4952990e-01  -5.7554566e+00   5.7122623e+00
   2.0983013e+01  -2.1263798e+01   3.0000000e+02  -6.8713852e-01  -5.5606830e+00   6.1315933e+00
   2.0854442e+01  -2.1309973e+01   3.0000000e+02  -6.1027544e-01  -5.3424392e+00   6.5287951e+00
   2.0727444e+01  -2.1359879e+01   3.0000000e+02  -5.1872933e-01  -5.1046334e+00   6.9002782e+00
   2.0602144e+01  -2.1413467e+01   3.0000000e+02  -4.1238425e-01  -4.8514383e+00   7.2431632e+00
   2.0478663e+01  -2.1470685e+01   3.0000000e+02  -2.9124525e-01  -4.5870704e+00   7.5552974e+00
   2.0357120e+01  -2.1531480e+01   3.0000000e+02  -1.5546898e-01  -4.3156094e+00   7.8351999e+00
   2.0237635e+01  -2.1595791e+01   3.0000000e+02  -5.4171955e-03  -4.0408643e+00   8.0819665e+00
   2.0120326e+01  -2.1663558e+01   3.0000000e+02   1.5832872e-01  -3.7662732e+00   8.2951819e+00
   2.0005307e+01  -2.1734714e+01   3.0000000e+02   3.3492456e-01  -3.4948531e+00   8.4748149e+00
   1.9892693e+01  -2.1809191e+01   3.0000000e+02   5.2326599e-01  -3.2292048e+00   8.6211227e+00
   1.9782595e+01  -2.1886917e+01   3.0000000e+02   7.2198655e-01  -2.9715235e+00   8.7345829e+00
   1.9675124e+01  -2.1967816e+01   3.0000000e+02   9.2947784e-01  -2.7236473e+00   8.8158339e+00
   1.9570388e+01  -2.2051811e+01   3.0000000e+02   1.1439304e+00  -2.4870944e+00   8.8656409e+00
   1.9468492e+01  -2.2138818e+01   3.0000000e+02   1.3633595e+00  -2.2631068e+00   8.8848723e+00
   1.9369541e+01  -2.2228755e+01   3.0000000e+02   1.5856738e+00  -2.0526949e+00   8.8744826e+00
   1.9273635e+01  -2.2321533e+01   3.0000000e+02   1.8086963e+00  -1.8566556e+00   8.8355096e+00
   1.9180874e+01  -2.2417061e+01   3.0000000e+02   2.0302195e+00  -1.6756067e+00   8.7690683e+00
   1.9091353e+01  -2.2515247e+01   3.0000000e+02   2.2480444e+00  -1.5099949e+00   8.6763484e+00
   1.9005168e+01  -2.2615993e+01   3.0000000e+02   2.4600024e+00  -1.3601227e+00   8.5586192e+00
   1.8922409e+01  -2.2719203e+01   3.0000000e+02   2.6640026e+00  -1.2261513e+00   8.4172229e+00
   1.8843164e+01  -2.2824773e+01   3.0000000e+02   2.8580370e+00  -1.1081206e+00   8.2535882e+00
   1.8767518e+01  -2.2932601e+01   3.0000000e+02   3.0402303e+00  -1.0059677e+00   8.0692195e+00
   1.8695556e+01  -2.3042579e+01   3.0000000e+02   3.2088519e+00  -9.1954504e-01   7.8657090e+00
   1.8627356e+01  -2.3154600e+01   3.0000000e+02   3.3623539e+00  -8.4862314e-01   7.6447222e+00
   1.8562994e+01  -2.3268552e+01   3.0000000e+02   3.4993886e+00  -7.9290757e-01   7.4080002e+00
   1.8502543e+01  -2.3384322e+01   3.0000000e+02   3.6188373e+00  -7.5204375e-01   7.1573349e+00
   1.8446075e+01  -2.3501796e+01   3.0000000e+02   3.7198235e+00  -7.2562071e-01   6.8945432e+00
   1.8393654e+01  -2.3620856e+01   3.0000000e+02   3.8017050e+00  -7.1314821e-01   6.6214425e+00
   1.8345344e+01  -2.3741382e+01   3.0000000e+02   3.8640671e+00  -7.1406787e-01   6.3398103e+00
   1.8301205e+01  -2.3863256e+01   3.0000000e+02   3.9066914e+00  -7.2774156e-01   6.0513423e+00
   1.8261291e+01  -2.3986353e+01   3.0000000e+02   3.9295030e+00  -7.5343507e-01   5.7576539e+00
   1.8225656e+01  -2.4110551e+01   3.0000000e+02   3.9325328e+00  -7.9034298e-01   5.4602479e+00
   1.8194347e+01  -2.4235723e+01   3.0000000e+02   3.9158611e+00  -8.3757332e-01   5.1605511e+00
   1.8167407e+01  -2.4361744e+01   3.0000000e+02   3.8795886e+00  -8.9417461e-01   4.8599275e+00
   1.8144879e+01  -2.4488485e+01   3.0000000e+02   3.8238292e+00  -9.5915676e-01   4.5597353e+00
   1.8126796e+01  -2.4615817e+01   3.0000000e+02   3.7487160e+00  -1.0314895e+00   4.2613691e+00
   1.8113192e+01  -2.4743611e+01   3.0000000e+02   3.6544516e+00  -1.1101455e+00   3.9662898e+00
   1.8104094e+01  -2.4871735e+01   3.0000000e+02   3.5413628e+00  -1.1940929e+00   3.6760548e+00
   1.8099525e+01  -2.5000059e+01   3.0000000e+02   3.4099686e+00  -1.2823178e+00   3.3922936e+00
   1.8099504e+01  -2.5128449e+01   3.0000000e+02   3.2610503e+00  -1.3738283e+00   3.1166820e+00
   1.8104045e+01  -2.5256773e+01   3.0000000e+02   3.0956930e+00  -1.4676632e+00   2.8508619e+00
   1.8113158e+01  -2.5384899e+01   3.0000000e+02   2.9153104e+00  -1.5629003e+00   2.5963595e+00
   1.8126848e+01  -2.5512693e+01   3.0000000e+02   2.7216379e+00  -1.6586596e+00   2.3544940e+00
   1.8145116e+01  -2.5640021e+01   3.0000000e+02   2.5166875e+00  -1.7541155e+00   2.1262777e+00
   1.8167958e+01  -2.5766751e+01   3.0000000e+02   2.3026694e+00  -1.8485017e+00   1.9123329e+00
   1.8195363e+01  -2.5892749e+01   3.0000000e+02   2.0818984e+00  -1.9411088e+00   1.7128421e+00
   1.8227318e+01  -2.6017883e+01   3.0000000e+02   1.8566694e+00  -2.0312958e+00   1.5275058e+00
   1.8263805e+01  -2.6142020e+01   3.0000000e+02   1.6291342e+00  -2.1184741e+00   1.3555566e+00
   1.8304799e+01  -2.6265030e+01   3.0000000e+02   1.4011694e+00  -2.2020895e+00   1.1958021e+00
   1.8350270e+01  -2.6386779e+01   3.0000000e+02   1.1742799e+00  -2.2816059e+00   1.0467091e+00
   1.8400186e+01  -2.6507140e+01   3.0000000e+02   9.4949433e-01  -2.3564876e+00   9.0650420e-01
   1.8454507e+01  -2.6625982e+01   3.0000000e+02   7.2733927e-01  -2.4261658e+00   7.7332768e-01
   1.8513188e+01  -2.6743179e+01   3.0000000e+02   5.0782063e-01  -2.4900257e+00   6.4537311e-01
   1.8576181e+01  -2.6858603e+01   3.0000000e+02   2.9047940e-01  -2.5474040e+00   5.2103349e-01
   1.8643430e+01  -2.6972130e+01   3.0000000e+02   7.4472091e-02  -2.5975807e+00   3.9903849e-01
   1.8714876e+01  -2.7083636e+01   3.0000000e+02  -1.4129838e-01  -2.6398061e+00   2.7854733e-01
   1.8790455e+01  -2.7192999e+01   3.0000000e+02  -3.5803366e-01  -2.6733265e+00   1.5921210e-01
   1.8870096e+01  -2.7300101e+01   3.0000000e+02  -5.7687848e-01  -2.6974191e+00   4.1195484e-02
   1.8953724e+01  -2.7404824e+01   3.0000000e+02  -7.9875812e-01  -2.7114468e+00  -7.4871704e-02
   1.9041259e+01  -2.7507052e+01   3.0000000e+02  -1.0242432e+00  -2.7149015e+00  -1.8797206e-01
   1.9132616e+01  -2.7606672e+01   3.0000000e+02  -1.2534476e+00  -2.7074430e+00  -2.9682399e-01
   1.9227705e+01  -2.7703575e+01   3.0000000e+02  -1.4859709e+00  -2.6889213e+00  -4.0003063e-01
   1.9326430e+01  -2.7797652e+01   3.0000000e+02  -1.7208830e+00  -2.6593828e+00  -4.9624178e-01
   1.9428692e+01  -2.7888798e+01   3.0000000e+02  -1.9567742e+00  -2.6190449e+00  -5.8430990e-01
   1.9534387e+01  -2.7976912e+01   3.0000000e+02  -2.1918395e+00  -2.5682441e+00  -6.6341099e-01
   1.9643403e+01  -2.8061895e+01   3.0000000e+02  -2.4239900e+00  -2.5073658e+00  -7.3312283e-01
   1.9755629e+01  -2.8143652e+01   3.0000000e+02  -2.6510000e+00  -2.4367618e+00  -7.9346407e-01
   1.9870945e+01  -2.8222089e+01   3.0000000e+02  -2.8706267e+00  -2.3566643e+00  -8.4484726e-01
   1.9989228e+01  -2.8297119e+01   3.0000000e+02  -3.0807409e+00  -2.2671091e+00  -8.8798975e-01
   2.0110352e+01  -2.8368657e+01   3.0000000e+02  -3.2794087e+00  -2.1678935e+00  -9.2378957e-01
   2.0234185e+01  -2.8436620e+01   3.0000000e+02  -3.4649406e+00  -2.0585612e+00  -9.5316627e-01
   2.0360592e+01  -2.8500932e+01   3.0000000e+02  -3.6359169e+00  -1.9384186e+00  -9.7689515e-01
   2.0489434e+01  -2.8561520e+01   3.0000000e+02  -3.7911694e+00  -1.8065934e+00  -9.9547070e-01
   2.0620570e+01  -2.8618313e+01   3.0000000e+02  -3.9297505e+00  -1.6621132e+00  -1.0089987e+00
   2.0753853e+01  -2.8671247e+01   3.0000000e+02  -4.0508956e+00  -1.5039998e+00  -1.0171006e+00
   2.0889134e+01  -2.8720262e+01   3.0000000e+02  -4.1539876e+00  -1.3313713e+00  -1.0188860e+00
   2.1026261e+01  -2.8765300e+01   3.0000000e+02  -4.2385335e+00  -1.1435472e+00  -1.0129504e+00
   2.1165080e+01  -2.8806309e+01   3.0000000e+02  -4.3041604e+00  -9.4014482e-01  -9.9738559e-01
   2.1305433e+01  -2.8843244e+01   3.0000000e+02  -4.3506283e+00  -7.2118407e-01  -9.6982025e-01
   2.1447160e+01  -2.8876060e+01   3.0000000e+02  -4.3778576e+00  -4.8718856e-01  -9.2751510e-01
   2.1590100e+01  -2.8904720e+01   3.0000000e+02  -4.3859738e+00  -2.3928314e-01  -8.6744267e-01
   2.1734090e+01  -2.8929190e+01   3.0000000e+02  -4.3753545e+00   2.0707768e-02  -7.8644521e-01
   2.1878962e+01  -2.8949443e+01   3.0000000e+02  -4.3466799e+00   2.9017820e-01  -6.8141376e-01
   2.2024552e+01  -2.8965454e+01   3.0000000e+02  -4.3009749e+00   5.6572143e-01  -5.4953594e-01
   2.2170691e+01  -2.8977206e+01   3.0000000e+02  -4.2396398e+00   8.4313586e-01  -3.8854811e-01
   2.2317210e+01  -2.8984684e+01   3.0000000e+02  -4.1644586e+00   1.1175392e+00  -1.9702924e-01
   2.2463940e+01  -2.8987880e+01   3.0000000e+02  -4.0775809e+00   1.3835560e+00   2.5360519e-02
   2.2610713e+01  -2.8986789e+01   3.0000000e+02  -3.9814733e+00   1.6355903e+00   2.7767911e-01
   2.2757357e+01  -2.8981415e+01   3.0000000e+02  -3.8788403e+00   1.8681413e+00   5.5761055e-01
   2.2903704e+01  -2.8971761e+01   3.0000000e+02  -3.7725188e+00   2.0761757e+00   8.6147478e-01
   2.3049584e+01  -2.8957841e+01   3.0000000e+02  -3.6653505e+00   2.2554425e+00   1.1843875e+00
   2.3194830e+01  -2.8939670e+01   3.0000000e+02  -3.5600549e+00   2.4027643e+00   1.5205029e+00
   2.3339274e+01  -2.8917268e+01   3.0000000e+02  -3.4591088e+00   2.5162161e+00   1.8633514e+00
   2.4096253e+01  -2.8862791e+01   3.0000000e+02  -2.8571924e+00   2.4410196e+00   3.7379306e+00
   2.4232789e+01  -2.8815636e+01   3.0000000e+02  -2.8053978e+00   2.3698218e+00   3.9860399e+00
   2.4367451e+01  -2.8764641e+01   3.0000000e+02  -2.7653189e+00   2.2820195e+00   4.2072557e+00
   2.4500096e+01  -2.8709861e+01   3.0000000e+02  -2.7365517e+00   2.1815989e+00   4.4003967e+00
   2.4630585e+01  -2.8651355e+01   3.0000000e+02  -2.7185387e+00   2.0723035e+00   4.5650900e+00
   2.4758781e+01  -2.8589188e+01   3.0000000e+02  -2.7106254e+00   1.9575260e+00   4.7016105e+00
   2.4884551e+01  -2.8523425e+01   3.0000000e+02  -2.7121128e+00   1.8402582e+00   4.8107114e+00
   2.5007765e+01  -2.8454138e+01   3.0000000e+02  -2.7222797e+00   1.7230794e+00   4.8934773e+00
   2.5128297e+01  -2.8381402e+01   3.0000000e+02  -2.7404099e+00   1.6081877e+00   4.9511928e+00
   2.5246025e+01  -2.8305293e+01   3.0000000e+02  -2.7658121e+00   1.4974499e+00   4.9852438e+00
   2.5360828e+01  -2.8225895e+01   3.0000000e+02  -2.7978226e+00   1.3924549e+00   4.9970607e+00
   2.5472593e+01  -2.8143290e+01   3.0000000e+02  -2.8358296e+00   1.2945600e+00   4.9880777e+00
   2.5581209e+01  -2.8057568e+01   3.0000000e+02  -2.8792768e+00   1.2049233e+00   4.9597243e+00
   2.5686569e+01  -2.7968819e+01   3.0000000e+02  -2.9276924e+00   1.1245211e+00   4.9134118e+00
   2.5788570e+01  -2.7877136e+01   3.0000000e+02  -2.9807016e+00   1.0541354e+00   4.8505277e+00
   2.5887114e+01  -2.7782618e+01   3.0000000e+02  -3.0380339e+00   9.9432432e-01   4.7724209e+00
   2.5982109e+01  -2.7685362e+01   3.0000000e+02  -3.0995359e+00   9.4539340e-01   4.6803534e+00
   2.6073464e+01  -2.7585471e+01   3.0000000e+02  -3.1651464e+00   9.0736265e-01   4.5754546e+00
   2.6161095e+01  -2.7483050e+01   3.0000000e+02  -3.2348567e+00   8.7994068e-01   4.4586564e+00
   2.6244923e+01  -2.7378205e+01   3.0000000e+02  -3.3086489e+00   8.6252930e-01   4.3306308e+00
   2.6324871e+01  -2.7271044e+01   3.0000000e+02  -3.3864119e+00   8.5425272e-01   4.1917494e+00
   2.6400870e+01  -2.7161679e+01   3.0000000e+02  -3.4678393e+00   8.5399880e-01   4.0420826e+00
   2.6472853e+01  -2.7050223e+01   3.0000000e+02  -3.5523503e+00   8.6050082e-01   3.8814281e+00
   2.6540758e+01  -2.6936789e+01   3.0000000e+02  -3.6390220e+00   8.7241520e-01   3.7093895e+00
   2.6604530e+01  -2.6821495e+01   3.0000000e+02  -3.7265544e+00   8.8839636e-01   3.5255027e+00
   2.6664117e+01  -2.6704458e+01   3.0000000e+02  -3.8133002e+00   9.0717752e-01   3.3293581e+00
   2.6719472e+01  -2.6585797e+01   3.0000000e+02  -3.8973286e+00   9.2761975e-01   3.1207423e+00
   2.6770551e+01  -2.6465632e+01   3.0000000e+02  -3.9765394e+00   9.4874817e-01   2.8997479e+00
   2.6817318e+01  -2.6344085e+01   3.0000000e+02  -4.0488004e+00   9.6975931e-01   2.6668556e+00
   2.6859740e+01  -2.6221278e+01   3.0000000e+02  -4.1121030e+00   9.9002226e-01   2.4229536e+00
   2.6897788e+01  -2.6097334e+01   3.0000000e+02  -4.1647041e+00   1.0090575e+00   2.1693199e+00
   2.6931439e+01  -2.5972378e+01   3.0000000e+02  -4.2052453e+00   1.0265051e+00   1.9075617e+00
   2.6960673e+01  -2.5846533e+01   3.0000000e+02  -4.2328405e+00   1.0420932e+00   1.6395062e+00
   2.6985477e+01  -2.5719925e+01   3.0000000e+02  -4.2471164e+00   1.0555929e+00   1.3670979e+00
   2.7005839e+01  -2.5592680e+01   3.0000000e+02  -4.2482168e+00   1.0667840e+00   1.0922575e+00
   2.7021754e+01  -2.5464922e+01   3.0000000e+02  -4.2367616e+00   1.0754116e+00   8.1675875e-01
   2.7033221e+01  -2.5336777e+01   3.0000000e+02  -4.2137706e+00   1.0811522e+00   5.4212067e-01
   2.7040243e+01  -2.5208372e+01   3.0000000e+02  -4.1805563e+00   1.0835831e+00   2.6951158e-01
   2.7042827e+01  -2.5079831e+01   3.0000000e+02  -4.1385890e+00   1.0821584e+00  -3.2396809e-04
   2.7040984e+01  -2.4951279e+01   3.0000000e+02  -4.0893474e+00   1.0761919e+00  -2.6708292e-01
   2.7034731e+01  -2.4822841e+01   3.0000000e+02  -4.0341633e+00   1.0648475e+00  -5.3088553e-01
   2.7024088e+01  -2.4694643e+01   3.0000000e+02  -3.9740754e+00   1.0471435e+00  -7.9220986e-01
   2.7009076e+01  -2.4566806e+01   3.0000000e+02  -3.9097039e+00   1.0219655e+00  -1.0517903e+00
   2.6989726e+01  -2.4439455e+01   3.0000000e+02  -3.8411777e+00   9.8809410e-01  -1.3104312e+00
   2.6966067e+01  -2.4312712e+01   3.0000000e+02  -3.7681049e+00   9.4425208e-01  -1.5688529e+00
   2.6938135e+01  -2.4186697e+01   3.0000000e+02  -3.6896180e+00   8.8916197e-01  -1.8274893e+00
   2.6905970e+01  -2.4061531e+01   3.0000000e+02  -3.6044817e+00   8.2162143e-01  -2.0863200e+00
   2.6869613e+01  -2.3937333e+01   3.0000000e+02  -3.5112519e+00   7.4058106e-01  -2.3447604e+00
   2.6829112e+01  -2.3814220e+01   3.0000000e+02  -3.4084744e+00   6.4522018e-01  -2.6016014e+00
   2.6784515e+01  -2.3692310e+01   3.0000000e+02  -3.2948825e+00   5.3501173e-01  -2.8550389e+00
   2.6735876e+01  -2.3571717e+01   3.0000000e+02  -3.1695736e+00   4.0975939e-01  -3.1027721e+00
   2.6683251e+01  -2.3452554e+01   3.0000000e+02  -3.0321301e+00   2.6961118e-01  -3.3421559e+00
   2.6626700e+01  -2.3334934e+01   3.0000000e+02  -2.8826768e+00   1.1504428e-01  -3.5703754e+00
   2.6566286e+01  -2.3218967e+01   3.0000000e+02  -2.7218620e+00  -5.3179602e-02  -3.7846234e+00
   2.6502074e+01  -2.3104761e+01   3.0000000e+02  -2.5507843e+00  -2.3407024e-01  -3.9822380e+00
   2.6434133e+01  -2.2992422e+01   3.0000000e+02  -2.3708857e+00  -4.2646709e-01  -4.1607883e+00
   2.6362536e+01  -2.2882056e+01   3.0000000e+02  -2.1838376e+00  -6.2908676e-01  -4.3181087e+00
   2.6287357e+01  -2.2773764e+01   3.0000000e+02  -1.9914304e+00  -8.4056591e-01  -4.4523001e+00
   2.6208673e+01  -2.2667647e+01   3.0000000e+02  -1.7955092e+00  -1.0594674e+00  -4.5616947e+00
   2.6126565e+01  -2.2563803e+01   3.0000000e+02  -1.5979362e+00  -1.2842793e+00  -4.6448324e+00
   2.6041115e+01  -2.2462328e+01   3.0000000e+02  -1.4005820e+00  -1.5134012e+00  -4.7004513e+00
   2.5952409e+01  -2.2363316e+01   3.0000000e+02  -1.2053423e+00  -1.7451234e+00  -4.7275088e+00
   2.5860534e+01  -2.2266857e+01   3.0000000e+02  -1.0141509e+00  -1.9776229e+00  -4.7252330e+00
   2.5765580e+01  -2.2173041e+01   3.0000000e+02  -8.2899589e-01  -2.2089600e+00  -4.6931956e+00
   2.5667641e+01  -2.2081952e+01   3.0000000e+02  -6.5191233e-01  -2.4371106e+00  -4.6313999e+00
   2.5566809e+01  -2.1993676e+01   3.0000000e+02  -4.8495668e-01  -2.6600105e+00  -4.5403588e+00
   2.5463183e+01  -2.1908291e+01   3.0000000e+02  -3.3016829e-01  -2.8756272e+00  -4.4211665e+00
   2.5356861e+01  -2.1825877e+01   3.0000000e+02  -1.8950754e-01  -3.0820457e+00  -4.2755320e+00
   2.5247944e+01  -2.1746508e+01   3.0000000e+02  -6.4785653e-02  -3.2775769e+00  -4.1057830e+00
   2.5136533e+01  -2.1670257e+01   3.0000000e+02   4.2411946e-02  -3.4608652e+00  -3.9148224e+00
   2.5022735e+01  -2.1597193e+01   3.0000000e+02   1.3079955e-01  -3.6309946e+00  -3.7060477e+00
   2.4906654e+01  -2.1527383e+01   3.0000000e+02   1.9946910e-01  -3.7875925e+00  -3.4832036e+00
   2.4788398e+01  -2.1460889e+01   3.0000000e+02   2.4794477e-01  -3.9308940e+00  -3.2502093e+00
   2.4668077e+01  -2.1397772e+01   3.0000000e+02   2.7622510e-01  -4.0617725e+00  -3.0109428e+00
   2.4545802e+01  -2.1338090e+01   3.0000000e+02   2.8479955e-01  -4.1817233e+00  -2.7690014e+00
   2.4421685e+01  -2.1281896e+01   3.0000000e+02   2.7463439e-01  -4.2927880e+00  -2.5274650e+00
   2.4295839e+01  -2.1229241e+01   3.0000000e+02   2.4713037e-01  -4.3974232e+00  -2.2886870e+00
   2.4168379e+01  -2.1180172e+01   3.0000000e+02   2.0405332e-01  -4.4983224e+00  -2.0541309e+00
   2.4039421e+01  -2.1134735e+01   3.0000000e+02   1.4744726e-01  -4.5982103e+00  -1.8242725e+00
   2.3909081e+01  -2.1092970e+01   3.0000000e+02   7.9531979e-02  -4.6996241e+00  -1.5985747e+00
   2.3777478e+01  -2.1054914e+01   3.0000000e+02   2.6054963e-03  -4.8047040e+00  -1.3755501e+00
   2.3644730e+01  -2.1020603e+01   3.0000000e+02  -8.1046483e-02  -4.9150200e+00  -1.1528799e+00
   2.3510958e+01  -2.0990066e+01   3.0000000e+02  -1.6922948e-01  -5.0314308e+00  -9.2760006e-01
   2.3376280e+01  -2.0963332e+01   3.0000000e+02  -2.5989343e-01  -5.1540085e+00  -6.9630847e-01
   2.3240818e+01  -2.0940424e+01   3.0000000e+02  -3.5116975e-01  -5.2819960e+00  -4.5541142e-01
   2.3104694e+01  -2.0921363e+01   3.0000000e+02  -4.4138562e-01  -5.4138292e+00  -2.0135313e-01
   2.2968029e+01  -2.0906167e+01   3.0000000e+02  -5.2906468e-01  -5.5471965e+00   6.9162319e-02
   2.2830946e+01  -2.0894848e+01   3.0000000e+02  -6.1291485e-01  -5.6791293e+00   3.5896083e-01
   2.2693567e+01  -2.0887418e+01   3.0000000e+02  -6.9180185e-01  -5.8061330e+00   6.7023398e-01
   2.2556015e+01  -2.0883882e+01   3.0000000e+02  -7.6472778e-01  -5.9243282e+00   1.0043907e+00
   2.2418413e+01  -2.0884244e+01   3.0000000e+02  -8.3079776e-01  -6.0296196e+00   1.3619609e+00
   2.2280884e+01  -2.0888504e+01   3.0000000e+02  -8.8919691e-01  -6.1178697e+00   1.7425298e+00
   2.2143550e+01  -2.0896658e+01   3.0000000e+02  -9.3916972e-01  -6.1850817e+00   2.1447185e+00
   2.2006536e+01  -2.0908698e+01   3.0000000e+02  -9.8000376e-01  -6.2275812e+00   2.5661909e+00
   2.1869962e+01  -2.0924614e+01   3.0000000e+02  -1.0110227e+00  -6.2421994e+00   3.0037421e+00
   2.1733952e+01  -2.0944391e+01   3.0000000e+02  -1.0315838e+00  -6.2264349e+00   3.4533737e+00
   2.1598626e+01  -2.0968012e+01   3.0000000e+02  -1.0410789e+00  -6.1785997e+00   3.9104699e+00
   2.1464108e+01  -2.0995455e+01   3.0000000e+02  -1.0389388e+00  -6.0979297e+00   4.3699549e+00
   2.1330516e+01  -2.1026695e+01   3.0000000e+02  -1.0246354e+00  -5.9846429e+00   4.8265419e+00
   2.1197972e+01  -2.1061705e+01   3.0000000e+02  -9.9767816e-01  -5.8399505e+00   5.2749341e+00
   2.1066595e+01  -2.1100453e+01   3.0000000e+02  -9.5761776e-01  -5.6659912e+00   5.7100709e+00
   2.0936503e+01  -2.1142903e+01   3.0000000e+02  -9.0404347e-01  -5.4657102e+00   6.1273263e+00
   2.0807815e+01  -2.1189019e+01   3.0000000e+02  -8.3657840e-01  -5.2426871e+00   6.5226699e+00
   2.0680646e+01  -2.1238757e+01   3.0000000e+02  -7.5490302e-01  -5.0009141e+00   6.8927742e+00
   2.0555112e+01  -2.1292074e+01   3.0000000e+02  -6.5875924e-01  -4.7445803e+00   7.2350512e+00
   2.0431329e+01  -2.1348920e+01   3.0000000e+02  -5.4799623e-01  -4.4778566e+00   7.5476266e+00
   2.0309409e+01  -2.1409245e+01   3.0000000e+02  -4.2259758e-01  -4.2047057e+00   7.8292854e+00
   2.0189464e+01  -2.1472994e+01   3.0000000e+02  -2.8273542e-01  -3.9287566e+00   8.0793559e+00
   2.0071604e+01  -2.1540108e+01   3.0000000e+02  -1.2881131e-01  -3.6532197e+00   8.2976009e+00
   1.9955939e+01  -2.1610529e+01   3.0000000e+02   3.8522362e-02  -3.3808614e+00   8.4841084e+00
   1.9842576e+01  -2.1684190e+01   3.0000000e+02   2.1832219e-01  -3.1140088e+00   8.6391955e+00
   1.9731622e+01  -2.1761026e+01   3.0000000e+02   4.0937979e-01  -2.8545958e+00   8.7633407e+00
   1.9623179e+01  -2.1840966e+01   3.0000000e+02   6.1022273e-01  -2.6042064e+00   8.8571362e+00
   1.9517350e+01  -2.1923938e+01   3.0000000e+02   8.1916084e-01  -2.3641456e+00   8.9212552e+00
   1.9414236e+01  -2.2009866e+01   3.0000000e+02   1.0343240e+00  -2.1354845e+00   8.9564399e+00
   1.9313935e+01  -2.2098672e+01   3.0000000e+02   1.2537165e+00  -1.9191008e+00   8.9634948e+00
   1.9216543e+01  -2.2190274e+01   3.0000000e+02   1.4752604e+00  -1.7157122e+00   8.9432850e+00
   1.9122155e+01  -2.2284588e+01   3.0000000e+02   1.6968447e+00  -1.5259011e+00   8.8967345e+00
   1.9030862e+01  -2.2381528e+01   3.0000000e+02   1.9163615e+00  -1.3501227e+00   8.8248269e+00
   1.8942755e+01  -2.2481005e+01   3.0000000e+02   2.1317343e+00  -1.1887251e+00   8.7286056e+00
   1.8857919e+01  -2.2582927e+01   3.0000000e+02   2.3409407e+00  -1.0419467e+00   8.6091764e+00
   1.8776441e+01  -2.2687201e+01   3.0000000e+02   2.5420386e+00  -9.0994354e-01   8.4677090e+00
   1.8698403e+01  -2.2793729e+01   3.0000000e+02   2.7331751e+00  -7.9278557e-01   8.3054484e+00
   1.8623884e+01  -2.2902414e+01   3.0000000e+02   2.9126193e+00  -6.9047490e-01   8.1237136e+00
   1.8552961e+01  -2.3013155e+01   3.0000000e+02   3.0787746e+00  -6.0295698e-01   7.9239125e+00
   1.8485708e+01  -2.3125849e+01   3.0000000e+02   3.2302084e+00  -5.3012673e-01   7.7075425e+00
   1.8422197e+01  -2.3240390e+01   3.0000000e+02   3.3656768e+00  -4.7183240e-01   7.4761894e+00
   1.8362495e+01  -2.3356673e+01   3.0000000e+02   3.4841531e+00  -4.2786821e-01   7.2315069e+00
   1.8306669e+01  -2.3474588e+01   3.0000000e+02   3.5848367e+00  -3.9797192e-01   6.9752042e+00
   1.8254781e+01  -2.3594025e+01   3.0000000e+02   3.6671610e+00  -3.8180476e-01   6.7090020e+00
   1.8206889e+01  -2.3714872e+01   3.0000000e+02   3.7307766e+00  -3.7893868e-01   6.4345985e+00
   1.8163049e+01  -2.3837014e+01   3.0000000e+02   3.7755223e+00  -3.8884922e-01   6.1536346e+00
   1.8123314e+01  -2.3960337e+01   3.0000000e+02   3.8013808e+00  -4.1091207e-01   5.8676572e+00
   1.8087733e+01  -2.4084724e+01   3.0000000e+02   3.8084226e+00  -4.4439986e-01   5.5781193e+00
   1.8056352e+01  -2.4210057e+01   3.0000000e+02   3.7967572e+00  -4.8849645e-01   5.2863865e+00
   1.8029211e+01  -2.4336217e+01   3.0000000e+02   3.7664934e+00  -5.4230646e-01   4.9937685e+00
   1.8006351e+01  -2.4463082e+01   3.0000000e+02   3.7177307e+00  -6.0489000e-01   4.7015675e+00
   1.7987804e+01  -2.4590533e+01   3.0000000e+02   3.6505630e+00  -6.7526550e-01   4.4111160e+00
   1.7973603e+01  -2.4718446e+01   3.0000000e+02   3.5651291e+00  -7.5244480e-01   4.1238319e+00
   1.7963774e+01  -2.4846698e+01   3.0000000e+02   3.4616665e+00  -8.3543463e-01   3.8412289e+00
   1.7958339e+01  -2.4975166e+01   3.0000000e+02   3.3405857e+00  -9.2325363e-01   3.5649097e+00
   1.7957318e+01  -2.5103725e+01   3.0000000e+02   3.2025423e+00  -1.0149431e+00   3.2965308e+00
   1.7960726e+01  -2.5232251e+01   3.0000000e+02   3.0484861e+00  -1.1095681e+00   3.0377321e+00
   1.7968574e+01  -2.5360618e+01   3.0000000e+02   2.8796932e+00  -1.2062238e+00   2.7900562e+00
   1.7980868e+01  -2.5488700e+01   3.0000000e+02   2.6977603e+00  -1.3040416e+00   2.5548493e+00
   1.7997609e+01  -2.5616372e+01   3.0000000e+02   2.5045667e+00  -1.4021983e+00   2.3331655e+00
   1.8018797e+01  -2.5743509e+01   3.0000000e+02   2.3022099e+00  -1.4999331e+00   2.1256835e+00
   1.8044425e+01  -2.5869984e+01   3.0000000e+02   2.0929138e+00  -1.5965389e+00   1.9326543e+00
   1.8074481e+01  -2.5995673e+01   3.0000000e+02   1.8789099e+00  -1.6913714e+00   1.7538609e+00
   1.8108951e+01  -2.6120450e+01   3.0000000e+02   1.6623254e+00  -1.7838486e+00   1.5886218e+00
   1.8147814e+01  -2.6244192e+01   3.0000000e+02   1.4450515e+00  -1.8734293e+00   1.4358282e+00
   1.8191046e+01  -2.6366774e+01   3.0000000e+02   1.2286426e+00  -1.9596027e+00   1.2940151e+00
   1.8238617e+01  -2.6488074e+01   3.0000000e+02   1.0142174e+00  -2.0418596e+00   1.1614642e+00
   1.8290494e+01  -2.6607968e+01   3.0000000e+02   8.0241004e-01  -2.1196761e+00   1.0363297e+00
   1.8346639e+01  -2.6726337e+01   3.0000000e+02   5.9333915e-01  -2.1924890e+00   9.1677877e-01
   1.8407007e+01  -2.6843059e+01   3.0000000e+02   3.8664715e-01  -2.2596815e+00   8.0114116e-01
   1.8471551e+01  -2.6958016e+01   3.0000000e+02   1.8155545e-01  -2.3205898e+00   6.8803025e-01
   1.8540219e+01  -2.7071091e+01   3.0000000e+02  -2.3022983e-02  -2.3745077e+00   5.7645587e-01
   1.8612953e+01  -2.7182167e+01   3.0000000e+02  -2.2834509e-01  -2.4207094e+00   4.6589815e-01
   1.8689691e+01  -2.7291131e+01   3.0000000e+02  -4.3569050e-01  -2.4584840e+00   3.5633516e-01
   1.8770366e+01  -2.7397869e+01   3.0000000e+02  -6.4619624e-01  -2.4871794e+00   2.4822895e-01
   1.8854906e+01  -2.7502272e+01   3.0000000e+02  -8.6071916e-01  -2.5062435e+00   1.4246642e-01
   1.8943236e+01  -2.7604231e+01   3.0000000e+02  -1.0797091e+00  -2.5152728e+00   4.0253809e-02
   1.9035274e+01  -2.7703640e+01   3.0000000e+02  -1.3031259e+00  -2.5140387e+00  -5.7008958e-02
   1.9130935e+01  -2.7800395e+01   3.0000000e+02  -1.5304016e+00  -2.5025109e+00  -1.4788848e-01
   1.9230129e+01  -2.7894394e+01   3.0000000e+02  -1.7604487e+00  -2.4808512e+00  -2.3107208e-01
   1.9332762e+01  -2.7985538e+01   3.0000000e+02  -1.9917194e+00  -2.4493840e+00  -3.0551312e-01
   1.9438735e+01  -2.8073732e+01   3.0000000e+02  -2.2223030e+00  -2.4085421e+00  -3.7054152e-01
   1.9547944e+01  -2.8158881e+01   3.0000000e+02  -2.4500457e+00  -2.3587982e+00  -4.2593770e-01
   1.9660282e+01  -2.8240897e+01   3.0000000e+02  -2.6726992e+00  -2.3005747e+00  -4.7194073e-01
   1.9775638e+01  -2.8319690e+01   3.0000000e+02  -2.8880415e+00  -2.2341682e+00  -5.0921685e-01
   1.9893896e+01  -2.8395178e+01   3.0000000e+02  -3.0940006e+00  -2.1596668e+00  -5.3874699e-01
   2.0014936e+01  -2.8467279e+01   3.0000000e+02  -3.2887280e+00  -2.0769112e+00  -5.6170766e-01
   2.0138635e+01  -2.8535917e+01   3.0000000e+02  -3.4706497e+00  -1.9854706e+00  -5.7930488e-01
   2.0264866e+01  -2.8601016e+01   3.0000000e+02  -3.6384672e+00  -1.8846648e+00  -5.9262756e-01
   2.0393498e+01  -2.8662508e+01   3.0000000e+02  -3.7911415e+00  -1.7736039e+00  -6.0248623e-01
   2.0524398e+01  -2.8720326e+01   3.0000000e+02  -3.9278451e+00  -1.6512656e+00  -6.0931800e-01
   2.0657429e+01  -2.8774407e+01   3.0000000e+02  -4.0479121e+00  -1.5165786e+00  -6.1309777e-01
   2.0792450e+01  -2.8824692e+01   3.0000000e+02  -4.1507903e+00  -1.3685161e+00  -6.1329397e-01
   2.0929318e+01  -2.8871127e+01   3.0000000e+02  -4.2360078e+00  -1.2061854e+00  -6.0885372e-01
   2.1067889e+01  -2.8913662e+01   3.0000000e+02  -4.3031549e+00  -1.0289175e+00  -5.9821567e-01
   2.1208013e+01  -2.8952250e+01   3.0000000e+02  -4.3518857e+00  -8.3636247e-01  -5.7933748e-01
   2.1349541e+01  -2.8986849e+01   3.0000000e+02  -4.3819450e+00  -6.2857258e-01  -5.4974306e-01
   2.1492320e+01  -2.9017421e+01   3.0000000e+02  -4.3932062e+00  -4.0610647e-01  -5.0659205e-01
   2.1636196e+01  -2.9043932e+01   3.0000000e+02  -4.3857253e+00  -1.7012569e-01  -4.4678448e-01
   2.1781013e+01  -2.9066355e+01   3.0000000e+02  -4.3598003e+00   7.7508277e-02  -3.6709549e-01
   2.1926614e+01  -2.9084663e+01   3.0000000e+02  -4.3160318e+00   3.3416340e-01  -2.6438843e-01
   2.2072840e+01  -2.9098837e+01   3.0000000e+02  -4.2553764e+00   5.9640362e-01  -1.3582728e-01
   2.2219533e+01  -2.9108862e+01   3.0000000e+02  -4.1791842e+00   8.6002843e-01   2.0846006e-02
   2.2366531e+01  -2.9114726e+01   3.0000000e+02  -4.0892184e+00   1.1201787e+00   2.0703360e-01
   2.2513676e+01  -2.9116423e+01   3.0000000e+02  -3.9876360e+00   1.3715481e+00   4.2305564e-01
   2.2660805e+01  -2.9113951e+01   3.0000000e+02  -3.8769466e+00   1.6086423e+00   6.6795662e-01
   2.2807759e+01  -2.9107313e+01   3.0000000e+02  -3.7599238e+00   1.8261189e+00   9.3943854e-01
   2.2954377e+01  -2.9096516e+01   3.0000000e+02  -3.6394986e+00   2.0191199e+00   1.2338825e+00
   2.3100500e+01  -2.9081572e+01   3.0000000e+02  -3.5186240e+00   2.1835957e+00   1.5465083e+00
   2.3245967e+01  -2.9062498e+01   3.0000000e+02  -3.4001409e+00   2.3165589e+00   1.8716198e+00
   2.3390621e+01  -2.9039314e+01   3.0000000e+02  -3.2866450e+00   2.4162627e+00   2.2029452e+00
   2.3534304e+01  -2.9012045e+01   3.0000000e+02  -3.1803829e+00   2.4822597e+00   2.5339989e+00
   2.3676862e+01  -2.8980722e+01   3.0000000e+02  -3.0831723e+00   2.5153622e+00   2.8584634e+00
   2.3818141e+01  -2.8945379e+01   3.0000000e+02  -2.9963732e+00   2.5175082e+00   3.1705052e+00
   2.3957988e+01  -2.8906054e+01   3.0000000e+02  -2.9208881e+00   2.4915543e+00   3.4650426e+00
   2.4700234e+01  -2.8764147e+01   3.0000000e+02  -2.4708207e+00   1.8675333e+00   4.7918582e+00
   2.4828699e+01  -2.8701863e+01   3.0000000e+02  -2.4613765e+00   1.7481321e+00   4.9185756e+00
   2.4954798e+01  -2.8636081e+01   3.0000000e+02  -2.4619637e+00   1.6269523e+00   5.0192482e+00
   2.5078409e+01  -2.8566866e+01   3.0000000e+02  -2.4717838e+00   1.5064390e+00   5.0949721e+00
   2.5199411e+01  -2.8494290e+01   3.0000000e+02  -2.4900355e+00   1.3886772e+00   5.1470173e+00
   2.5317689e+01  -2.8418426e+01   3.0000000e+02  -2.5159376e+00   1.2754440e+00   5.1767415e+00
   2.5433129e+01  -2.8339351e+01   3.0000000e+02  -2.5487442e+00   1.1682715e+00   5.1855344e+00
   2.5545622e+01  -2.8257145e+01   3.0000000e+02  -2.5877593e+00   1.0684913e+00   5.1747950e+00
   2.5655063e+01  -2.8171890e+01   3.0000000e+02  -2.6323578e+00   9.7726991e-01   5.1459230e+00
   2.5761351e+01  -2.8083672e+01   3.0000000e+02  -2.6820049e+00   8.9561825e-01   5.1003221e+00
   2.5864388e+01  -2.7992580e+01   3.0000000e+02  -2.7362820e+00   8.2438172e-01   5.0393961e+00
   2.5964080e+01  -2.7898703e+01   3.0000000e+02  -2.7949109e+00   7.6421051e-01   4.9645295e+00
   2.6060338e+01  -2.7802136e+01   3.0000000e+02  -2.8577536e+00   7.1550942e-01   4.8770577e+00
   2.6153076e+01  -2.7702974e+01   3.0000000e+02  -2.9248160e+00   6.7840326e-01   4.7782000e+00
   2.6242214e+01  -2.7601315e+01   3.0000000e+02  -2.9962085e+00   6.5269664e-01   4.6689901e+00
   2.6327675e+01  -2.7497260e+01   3.0000000e+02  -3.0720885e+00   6.3786651e-01   4.5501982e+00
   2.6409385e+01  -2.7390910e+01   3.0000000e+02  -3.1525791e+00   6.3308013e-01   4.4222636e+00
   2.6487277e+01  -2.7282370e+01   3.0000000e+02  -3.2376562e+00   6.3722997e-01   4.2852679e+00
   2.6561286e+01  -2.7171746e+01   3.0000000e+02  -3.3270505e+00   6.4901172e-01   4.1389402e+00
   2.6631354e+01  -2.7059144e+01   3.0000000e+02  -3.4201516e+00   6.6700325e-01   3.9827174e+00
   2.6697424e+01  -2.6944675e+01   3.0000000e+02  -3.5159450e+00   6.8975660e-01   3.8158564e+00
   2.6759446e+01  -2.6828448e+01   3.0000000e+02  -3.6130011e+00   7.1587982e-01   3.6375654e+00
   2.6817373e+01  -2.6710576e+01   3.0000000e+02  -3.7095072e+00   7.4410389e-01   3.4471663e+00
   2.6871163e+01  -2.6591172e+01   3.0000000e+02  -3.8033596e+00   7.7333027e-01   3.2442342e+00
   2.6920779e+01  -2.6470349e+01   3.0000000e+02  -3.8922923e+00   8.0265451e-01   3.0287131e+00
   2.6966186e+01  -2.6348224e+01   3.0000000e+02  -3.9740297e+00   8.3136932e-01   2.8009943e+00
   2.7007356e+01  -2.6224910e+01   3.0000000e+02  -4.0464512e+00   8.5894989e-01   2.5619229e+00
   2.7044263e+01  -2.6100527e+01   3.0000000e+02  -4.1077342e+00   8.8502451e-01   2.3127873e+00
   2.7076887e+01  -2.5975189e+01   3.0000000e+02  -4.1564824e+00   9.0934069e-01   2.0552199e+00
   2.7105211e+01  -2.5849016e+01   3.0000000e+02  -4.1918040e+00   9.3171990e-01   1.7911135e+00
   2.7129222e+01  -2.5722126e+01   3.0000000e+02  -4.2133574e+00   9.5201597e-01   1.5224777e+00
   2.7148913e+01  -2.5594636e+01   3.0000000e+02  -4.2213476e+00   9.7006936e-01   1.2513071e+00
   2.7164279e+01  -2.5466666e+01   3.0000000e+02  -4.2164843e+00   9.8566898e-01   9.7945403e-01
   2.7175320e+01  -2.5338334e+01   3.0000000e+02  -4.1999022e+00   9.9851683e-01   7.0849897e-01
   2.7182040e+01  -2.5209758e+01   3.0000000e+02  -4.1730488e+00   1.0082007e+00   4.3965378e-01
   2.7184445e+01  -2.5081057e+01   3.0000000e+02  -4.1375482e+00   1.0141759e+00   1.7368993e-01
   2.7182549e+01  -2.4952349e+01   3.0000000e+02  -4.0950451e+00   1.0157513e+00  -8.9092986e-02
   2.7176365e+01  -2.4823752e+01   3.0000000e+02  -4.0470441e+00   1.0120909e+00  -3.4886578e-01
   2.7165913e+01  -2.4695383e+01   3.0000000e+02  -3.9947539e+00   1.0022169e+00  -6.0620226e-01
   2.7151215e+01  -2.4567359e+01   3.0000000e+02  -3.9389543e+00   9.8502809e-01  -8.6197372e-01
   2.7132298e+01  -2.4439796e+01   3.0000000e+02  -3.8799015e+00   9.5932787e-01  -1.1171925e+00
   2.7109191e+01  -2.4312809e+01   3.0000000e+02  -3.8172875e+00   9.2386694e-01  -1.3728298e+00
   2.7081927e+01  -2.4186513e+01   3.0000000e+02  -3.7502654e+00   8.7739930e-01  -1.6296128e+00
   2.7050544e+01  -2.4061021e+01   3.0000000e+02  -3.6775428e+00   8.1874962e-01  -1.8878426e+00
   2.7015080e+01  -2.3936446e+01   3.0000000e+02  -3.5975347e+00   7.4688920e-01  -2.1472542e+00
   2.6975579e+01  -2.3812898e+01   3.0000000e+02  -3.5085619e+00   6.6100716e-01  -2.4069343e+00
   2.6932088e+01  -2.3690489e+01   3.0000000e+02  -3.4090661e+00   5.6057656e-01  -2.6653163e+00
   2.6884655e+01  -2.3569327e+01   3.0000000e+02  -3.2978019e+00   4.4539189e-01  -2.9202716e+00
   2.6833334e+01  -2.3449519e+01   3.0000000e+02  -3.1739937e+00   3.1558601e-01  -3.1692406e+00
   2.6778179e+01  -2.3331172e+01   3.0000000e+02  -3.0374161e+00   1.7161498e-01  -3.4094198e+00
   2.6719250e+01  -2.3214390e+01   3.0000000e+02  -2.8884080e+00   1.4214798e-02  -3.6379431e+00
   2.6656606e+01  -2.3099276e+01   3.0000000e+02  -2.7278119e+00  -1.5565907e-01  -3.8520449e+00
   2.6590313e+01  -2.2985930e+01   3.0000000e+02  -2.5568794e+00  -3.3689706e-01  -4.0491621e+00
   2.6520437e+01  -2.2874454e+01   3.0000000e+02  -2.3771484e+00  -5.2829201e-01  -4.2269872e+00
   2.6447046e+01  -2.2764942e+01   3.0000000e+02  -2.1903232e+00  -7.2859499e-01  -4.3834784e+00
   2.6370214e+01  -2.2657493e+01   3.0000000e+02  -1.9982044e+00  -9.3651550e-01  -4.5168133e+00
   2.6290014e+01  -2.2552199e+01   3.0000000e+02  -1.8026195e+00  -1.1507400e+00  -4.6253671e+00
   2.6206523e+01  -2.2449151e+01   3.0000000e+02  -1.6054165e+00  -1.3698994e+00  -4.7076769e+00
   2.6119820e+01  -2.2348440e+01   3.0000000e+02  -1.4084710e+00  -1.5925385e+00  -4.7624466e+00
   2.6029986e+01  -2.2250152e+01   3.0000000e+02  -1.2137000e+00  -1.8170938e+00  -4.7885864e+00
   2.5937105e+01  -2.2154373e+01   3.0000000e+02  -1.0230841e+00  -2.0418663e+00  -4.7852777e+00
   2.5841262e+01  -2.2061186e+01   3.0000000e+02  -8.3866672e-01  -2.2650275e+00  -4.7520615e+00
   2.5742546e+01  -2.1970670e+01   3.0000000e+02  -6.6254303e-01  -2.4846399e+00  -4.6889340e+00
   2.5641045e+01  -2.1882904e+01   3.0000000e+02  -4.9682468e-01  -2.6987045e+00  -4.5964282e+00
   2.5536852e+01  -2.1797963e+01   3.0000000e+02  -3.4359331e-01  -2.9052297e+00  -4.4756857e+00
   2.5430060e+01  -2.1715921e+01   3.0000000e+02  -2.0483364e-01  -3.1023234e+00  -4.3284897e+00
   2.5320763e+01  -2.1636847e+01   3.0000000e+02  -8.2360419e-02  -3.2883022e+00  -4.1572640e+00
   2.5209060e+01  -2.1560809e+01   3.0000000e+02   2.2252965e-02  -3.4617967e+00  -3.9650373e+00
   2.5095048e+01  -2.1487873e+01   3.0000000e+02   1.0775695e-01  -3.6218744e+00  -3.7553450e+00
   2.4978827e+01  -2.1418100e+01   3.0000000e+02   1.7329190e-01  -3.7681380e+00  -3.5320977e+00
   2.4860499e+01  -2.1351551e+01   3.0000000e+02   2.1844487e-01  -3.9008018e+00  -3.2994016e+00
   2.4740167e+01  -2.1288282e+01   3.0000000e+02   2.4328810e-01  -4.0207343e+00  -3.0613355e+00
   2.4617936e+01  -2.1228348e+01   3.0000000e+02   2.4839007e-01  -4.1294466e+00  -2.8217141e+00
   2.4493910e+01  -2.1171798e+01   3.0000000e+02   2.3479705e-01  -4.2290287e+00  -2.5838372e+00
   2.4368197e+01  -2.1118682e+01   3.0000000e+02   2.0398591e-01  -4.3220227e+00  -2.3502812e+00
   2.4240904e+01  -2.1069044e+01   3.0000000e+02   1.5778753e-01  -4.4112548e+00  -2.1227106e+00
   2.4112140e+01  -2.1022927e+01   3.0000000e+02   9.8293421e-02  -4.4996276e+00  -1.9017746e+00
   2.3982015e+01  -2.0980369e+01   3.0000000e+02   2.7748644e-02  -4.5898998e+00  -1.6870692e+00
   2.3850640e+01  -2.0941408e+01   3.0000000e+02  -5.1550004e-02  -4.6844748e+00  -1.4771819e+00
   2.3718127e+01  -2.0906075e+01   3.0000000e+02  -1.3735307e-01  -4.7852106e+00  -1.2698065e+00
   2.3584587e+01  -2.0874402e+01   3.0000000e+02  -2.2753101e-01  -4.8932792e+00  -1.0619145e+00
   2.3450134e+01  -2.0846414e+01   3.0000000e+02  -3.2013306e-01  -5.0090610e+00  -8.4997377e-01
   2.3314881e+01  -2.0822136e+01   3.0000000e+02  -4.1341597e-01  -5.1321063e+00  -6.3017725e-01
   2.3178943e+01  -2.0801588e+01   3.0000000e+02  -5.0585688e-01  -5.2611320e+00  -3.9868645e-01
   2.3042434e+01  -2.0784787e+01   3.0000000e+02  -5.9614600e-01  -5.3940723e+00  -1.5185556e-01
   2.2905469e+01  -2.0771748e+01   3.0000000e+02  -6.8316339e-01  -5.5281608e+00   1.1355701e-01
   2.2768162e+01  -2.0762482e+01   3.0000000e+02  -7.6595143e-01  -5.6600445e+00   4.0020994e-01
   2.2630631e+01  -2.0756996e+01   3.0000000e+02  -8.4367711e-01  -5.7859167e+00   7.1001837e-01
   2.2492990e+01  -2.0755296e+01   3.0000000e+02  -9.1559859e-01  -5.9016814e+00   1.0440598e+00
   2.2355354e+01  -2.0757382e+01   3.0000000e+02  -9.8103445e-01  -6.0031128e+00   1.4024830e+00
   2.2217840e+01  -2.0763253e+01   3.0000000e+02  -1.0393332e+00  -6.0860333e+00   1.7844704e+00
   2.2080563e+01  -2.0772904e+01   3.0000000e+02  -1.0898601e+00  -6.1464934e+00   2.1882469e+00
   2.1943639e+01  -2.0786326e+01   3.0000000e+02  -1.1319867e+00  -6.1809469e+00   2.6111114e+00
   2.1807183e+01  -2.0803510e+01   3.0000000e+02  -1.1650865e+00  -6.1864244e+00   3.0495288e+00
   2.1671309e+01  -2.0824438e+01   3.0000000e+02  -1.1885486e+00  -6.1606845e+00   3.4992410e+00
   2.1536133e+01  -2.0849095e+01   3.0000000e+02  -1.2017718e+00  -6.1023508e+00   3.9554348e+00
   2.1401768e+01  -2.0877460e+01   3.0000000e+02  -1.2041819e+00  -6.0110008e+00   4.4129437e+00
   2.1268327e+01  -2.0909507e+01   3.0000000e+02  -1.1952344e+00  -5.8872110e+00   4.8664622e+00
   2.1135925e+01  -2.0945211e+01   3.0000000e+02  -1.1744054e+00  -5.7325454e+00   5.3107821e+00
   2.1004672e+01  -2.0984540e+01   3.0000000e+02  -1.1411999e+00  -5.5494631e+00   5.7410272e+00
   2.0874681e+01  -2.1027462e+01   3.0000000e+02  -1.0951364e+00  -5.3411848e+00   6.1528327e+00
   2.0746062e+01  -2.1073939e+01   3.0000000e+02  -1.0357559e+00  -5.1114877e+00   6.5424991e+00
   2.0618925e+01  -2.1123933e+01   3.0000000e+02  -9.6262113e-01  -4.8644834e+00   6.9070724e+00
   2.0493378e+01  -2.1177402e+01   3.0000000e+02  -8.7534348e-01  -4.6043797e+00   7.2443565e+00
   2.0369531e+01  -2.1234298e+01   3.0000000e+02  -7.7362183e-01  -4.3352744e+00   7.5528548e+00
   2.0247488e+01  -2.1294575e+01   3.0000000e+02  -6.5727474e-01  -4.0609644e+00   7.8316999e+00
   2.0127355e+01  -2.1358180e+01   3.0000000e+02  -5.2630891e-01  -3.7848425e+00   8.0805042e+00
   2.0009238e+01  -2.1425060e+01   3.0000000e+02  -3.8095697e-01  -3.5098321e+00   8.2992452e+00
   1.9893237e+01  -2.1495158e+01   3.0000000e+02  -2.2172547e-01  -3.2383654e+00   8.4881520e+00
   1.9779456e+01  -2.1568413e+01   3.0000000e+02  -4.9419121e-02  -2.9724409e+00   8.6476013e+00
   1.9667993e+01  -2.1644763e+01   3.0000000e+02   1.3486433e-01  -2.7136599e+00   8.7780679e+00
   1.9558947e+01  -2.1724142e+01   3.0000000e+02   3.2974656e-01  -2.4633147e+00   8.8800783e+00
   1.9452415e+01  -2.1806483e+01   3.0000000e+02   5.3361364e-01  -2.2224514e+00   8.9542010e+00
   1.9348492e+01  -2.1891715e+01   3.0000000e+02   7.4465922e-01  -1.9919295e+00   9.0010425e+00
   1.9247271e+01  -2.1979765e+01   3.0000000e+02   9.6094482e-01  -1.7724679e+00   9.0212530e+00
   1.9148843e+01  -2.2070556e+01   3.0000000e+02   1.1804495e+00  -1.5646759e+00   9.0155320e+00
   1.9053298e+01  -2.2164012e+01   3.0000000e+02   1.4011299e+00  -1.3690746e+00   8.9846298e+00
   1.8960724e+01  -2.2260050e+01   3.0000000e+02   1.6209405e+00  -1.1861048e+00   8.9293529e+00
   1.8871205e+01  -2.2358588e+01   3.0000000e+02   1.8378806e+00  -1.0161295e+00   8.8505588e+00
   1.8784825e+01  -2.2459542e+01   3.0000000e+02   2.0500082e+00  -8.5944647e-01   8.7491569e+00
   1.8701666e+01  -2.2562822e+01   3.0000000e+02   2.2554438e+00  -7.1628935e-01   8.6261148e+00
   1.8621805e+01  -2.2668340e+01   3.0000000e+02   2.4523992e+00  -5.8683046e-01   8.4824559e+00
   1.8545320e+01  -2.2776004e+01   3.0000000e+02   2.6391760e+00  -4.7120109e-01   8.3192758e+00
   1.8472284e+01  -2.2885720e+01   3.0000000e+02   2.8141837e+00  -3.6948831e-01   8.1377525e+00
   1.8402770e+01  -2.2997391e+01   3.0000000e+02   2.9759596e+00  -2.8175074e-01   7.9391619e+00
   1.8336845e+01  -2.3110921e+01   3.0000000e+02   3.1231987e+00  -2.0800925e-01   7.7248780e+00
   1.8274577e+01  -2.3226210e+01   3.0000000e+02   3.2547751e+00  -1.4825360e-01   7.4963828e+00
   1.8216029e+01  -2.3343157e+01   3.0000000e+02   3.3697704e+00  -1.0241937e-01   7.2552476e+00
   1.8161262e+01  -2.3461657e+01   3.0000000e+02   3.4674889e+00  -7.0374926e-02   7.0031133e+00
   1.8110335e+01  -2.3581608e+01   3.0000000e+02   3.5474687e+00  -5.1907323e-02   6.7416382e+00
   1.8063301e+01  -2.3702902e+01   3.0000000e+02   3.6094546e+00  -4.6689157e-02   6.4724723e+00
   1.8020214e+01  -2.3825432e+01   3.0000000e+02   3.6533755e+00  -5.4286826e-02   6.1972018e+00
   1.7981122e+01  -2.3949089e+01   3.0000000e+02   3.6792874e+00  -7.4138507e-02   5.9173251e+00
   1.7946072e+01  -2.4073763e+01   3.0000000e+02   3.6873198e+00  -1.0557129e-01   5.6342392e+00
   1.7915107e+01  -2.4199342e+01   3.0000000e+02   3.6776188e+00  -1.4780745e-01   5.3492552e+00
   1.7888265e+01  -2.4325714e+01   3.0000000e+02   3.6503075e+00  -1.9998429e-01   5.0636269e+00
   1.7865583e+01  -2.4452765e+01   3.0000000e+02   3.6054737e+00  -2.6118541e-01   4.7786042e+00
   1.7847095e+01  -2.4580380e+01   3.0000000e+02   3.5431835e+00  -3.3046058e-01   4.4954826e+00
   1.7832828e+01  -2.4708444e+01   3.0000000e+02   3.4635211e+00  -4.0683749e-01   4.2156443e+00
   1.7822810e+01  -2.4836842e+01   3.0000000e+02   3.3666611e+00  -4.8935618e-01   3.9405767e+00
   1.7817062e+01  -2.4965456e+01   3.0000000e+02   3.2529395e+00  -5.7705829e-01   3.6718722e+00
   1.7815603e+01  -2.5094168e+01   3.0000000e+02   3.1229299e+00  -6.6900856e-01   3.4111791e+00
   1.7818447e+01  -2.5222862e+01   3.0000000e+02   2.9774942e+00  -7.6429416e-01   3.1601296e+00
   1.7825607e+01  -2.5351418e+01   3.0000000e+02   2.8178210e+00  -8.6203541e-01   2.9202615e+00
   1.7837088e+01  -2.5479719e+01   3.0000000e+02   2.6454120e+00  -9.6138117e-01   2.6929120e+00
   1.7852895e+01  -2.5607646e+01   3.0000000e+02   2.4620566e+00  -1.0615332e+00   2.4791287e+00
   1.7873026e+01  -2.5735080e+01   3.0000000e+02   2.2697617e+00  -1.1617404e+00   2.2795907e+00
   1.7897477e+01  -2.5861902e+01   3.0000000e+02   2.0706653e+00  -1.2613180e+00   2.0945481e+00
   1.7926240e+01  -2.5987996e+01   3.0000000e+02   1.8669237e+00  -1.3596467e+00   1.9237897e+00
   1.7959301e+01  -2.6113241e+01   3.0000000e+02   1.6606099e+00  -1.4561616e+00   1.7666564e+00
   1.7996643e+01  -2.6237521e+01   3.0000000e+02   1.4535818e+00  -1.5503510e+00   1.6220620e+00
   1.8038245e+01  -2.6360719e+01   3.0000000e+02   1.2473846e+00  -1.6417329e+00   1.4885680e+00
   1.8084083e+01  -2.6482717e+01   3.0000000e+02   1.0431611e+00  -1.7298347e+00   1.3644780e+00
   1.8134125e+01  -2.6603401e+01   3.0000000e+02   8.4158229e-01  -1.8141585e+00   1.2479610e+00
   1.8188338e+01  -2.6722654e+01   3.0000000e+02   6.4283050e-01  -1.8941750e+00   1.1371813e+00
   1.8246685e+01  -2.6840364e+01   3.0000000e+02   4.4659951e-01  -1.9693021e+00   1.0304363e+00
   1.8309121e+01  -2.6956416e+01   3.0000000e+02   2.5216192e-01  -2.0388959e+00   9.2629329e-01
   1.8375601e+01  -2.7070700e+01   3.0000000e+02   5.8446288e-02  -2.1022723e+00   8.2368510e-01
   1.8446073e+01  -2.7183105e+01   3.0000000e+02  -1.3582898e-01  -2.1587159e+00   7.2199779e-01
   1.8520480e+01  -2.7293523e+01   3.0000000e+02  -3.3201837e-01  -2.2075147e+00   6.2110674e-01
   1.8598764e+01  -2.7401844e+01   3.0000000e+02  -5.3139286e-01  -2.2480082e+00   5.2136718e-01
   1.8680860e+01  -2.7507965e+01   3.0000000e+02  -7.3500226e-01  -2.2796160e+00   4.2357810e-01
   1.8766698e+01  -2.7611781e+01   3.0000000e+02  -9.4353446e-01  -2.3018912e+00   3.2889310e-01
   1.8856206e+01  -2.7713190e+01   3.0000000e+02  -1.1572256e+00  -2.3145572e+00   2.3869775e-01
   1.8949307e+01  -2.7812092e+01   3.0000000e+02  -1.3757967e+00  -2.3175297e+00   1.5447183e-01
   1.9045919e+01  -2.7908389e+01   3.0000000e+02  -1.5984386e+00  -2.3109239e+00   7.7636037e-02
   1.9145956e+01  -2.8001987e+01   3.0000000e+02  -1.8238480e+00  -2.2950397e+00   9.4028257e-03
   1.9249328e+01  -2.8092791e+01   3.0000000e+02  -2.0502959e+00  -2.2703296e+00  -4.9357783e-02
   1.9355941e+01  -2.8180711e+01   3.0000000e+02  -2.2757464e+00  -2.2373327e+00  -9.8208310e-02
   1.9465698e+01  -2.8265659e+01   3.0000000e+02  -2.4979860e+00  -2.1966036e+00  -1.3719624e-01
   1.9578496e+01  -2.8347550e+01   3.0000000e+02  -2.7147607e+00  -2.1486255e+00  -1.6684352e-01
   1.9694230e+01  -2.8426301e+01   3.0000000e+02  -2.9239074e+00  -2.0937329e+00  -1.8809555e-01
   1.9812791e+01  -2.8501834e+01   3.0000000e+02  -3.1234599e+00  -2.0320396e+00  -2.0220731e-01
   1.9934064e+01  -2.8574071e+01   3.0000000e+02  -3.3117117e+00  -1.9634008e+00  -2.1061121e-01
   2.0057933e+01  -2.8642939e+01   3.0000000e+02  -3.4872583e+00  -1.8873934e+00  -2.1475913e-01
   2.0184280e+01  -2.8708368e+01   3.0000000e+02  -3.6489885e+00  -1.8033347e+00  -2.1597067e-01
   2.0312979e+01  -2.8770292e+01   3.0000000e+02  -3.7960441e+00  -1.7103276e+00  -2.1528729e-01
   2.0443904e+01  -2.8828647e+01   3.0000000e+02  -3.9277719e+00  -1.6073279e+00  -2.1338128e-01
   2.0576927e+01  -2.8883373e+01   3.0000000e+02  -4.0436601e+00  -1.4932209e+00  -2.1047514e-01
   2.0711915e+01  -2.8934415e+01   3.0000000e+02  -4.1432781e+00  -1.3669050e+00  -2.0629485e-01
   2.0848732e+01  -2.8981720e+01   3.0000000e+02  -4.2262312e+00  -1.2273750e+00  -2.0006806e-01
   2.0987242e+01  -2.9025238e+01   3.0000000e+02  -4.2921369e+00  -1.0737955e+00  -1.9053080e-01
   2.1127305e+01  -2.9064927e+01   3.0000000e+02  -4.3406169e+00  -9.0557729e-01  -1.7592758e-01
   2.1268778e+01  -2.9100743e+01   3.0000000e+02  -4.3713146e+00  -7.2246065e-01  -1.5407450e-01
   2.1411518e+01  -2.9132651e+01   3.0000000e+02  -4.3839323e+00  -5.2459422e-01  -1.2237328e-01
   2.1555379e+01  -2.9160617e+01   3.0000000e+02  -4.3782835e+00  -3.1263679e-01  -7.7903118e-02
   2.1700213e+01  -2.9184612e+01   3.0000000e+02  -4.3543567e+00  -8.7855502e-02  -1.7513528e-02
   2.1845873e+01  -2.9204611e+01   3.0000000e+02  -4.3123860e+00   1.4778663e-01   6.2024163e-02
   2.1992207e+01  -2.9220594e+01   3.0000000e+02  -4.2529212e+00   3.9155513e-01   1.6382279e-01
   2.2139067e+01  -2.9232544e+01   3.0000000e+02  -4.1768873e+00   6.3994292e-01   2.9063668e-01
   2.2286299e+01  -2.9240449e+01   3.0000000e+02  -4.0856315e+00   8.8870408e-01   4.4460076e-01
   2.2433751e+01  -2.9244300e+01   3.0000000e+02  -3.9809390e+00   1.1330010e+00   6.2696897e-01
   2.2581273e+01  -2.9244093e+01   3.0000000e+02  -3.8650159e+00   1.3676158e+00   8.3790097e-01
   2.2728710e+01  -2.9239829e+01   3.0000000e+02  -3.7404412e+00   1.5872179e+00   1.0762998e+00
   2.2875911e+01  -2.9231512e+01   3.0000000e+02  -3.6100727e+00   1.7867009e+00   1.3397639e+00
   2.3022724e+01  -2.9219151e+01   3.0000000e+02  -3.4769296e+00   1.9614996e+00   1.6246404e+00
   2.3168997e+01  -2.9202758e+01   3.0000000e+02  -3.3440537e+00   2.1078888e+00   1.9261865e+00
   2.3314579e+01  -2.9182350e+01   3.0000000e+02  -3.2143632e+00   2.2232148e+00   2.2388342e+00
   2.3459321e+01  -2.9157949e+01   3.0000000e+02  -3.0905169e+00   2.3060384e+00   2.5565164e+00
   2.3603074e+01  -2.9129581e+01   3.0000000e+02  -2.9748083e+00   2.3561780e+00   2.8730162e+00
   2.3745692e+01  -2.9097273e+01   3.0000000e+02  -2.8690917e+00   2.3746567e+00   3.1823193e+00
   2.3887028e+01  -2.9061061e+01   3.0000000e+02  -2.7747414e+00   2.3635500e+00   3.4789244e+00
   2.4026939e+01  -2.9020980e+01   3.0000000e+02  -2.6926621e+00   2.3257862e+00   3.7580847e+00
   2.4165283e+01  -2.8977074e+01   3.0000000e+02  -2.6233148e+00   2.2648870e+00   4.0159716e+00
   2.4301920e+01  -2.8929386e+01   3.0000000e+02  -2.5667887e+00   2.1847199e+00   4.2497357e+00
   2.4436714e+01  -2.8877967e+01   3.0000000e+02  -2.5228587e+00   2.0892439e+00   4.4575058e+00
   2.4569529e+01  -2.8822868e+01   3.0000000e+02  -2.4910757e+00   1.9823176e+00   4.6382896e+00
   2.5284045e+01  -2.8598997e+01   3.0000000e+02  -2.2422225e+00   1.1558256e+00   5.3079362e+00
   2.5402001e+01  -2.8523370e+01   3.0000000e+02  -2.2691620e+00   1.0419489e+00   5.3309775e+00
   2.5517216e+01  -2.8444644e+01   3.0000000e+02  -2.3030326e+00   9.3435059e-01   5.3346852e+00
   2.5629585e+01  -2.8362894e+01   3.0000000e+02  -2.3430775e+00   8.3430912e-01   5.3203821e+00
   2.5739012e+01  -2.8278198e+01   3.0000000e+02  -2.3886102e+00   7.4296659e-01   5.2894115e+00
   2.5845402e+01  -2.8190634e+01   3.0000000e+02  -2.4390529e+00   6.6135117e-01   5.2431392e+00
   2.5948661e+01  -2.8100286e+01   3.0000000e+02  -2.4939551e+00   5.9035449e-01   5.1829630e+00
   2.6048704e+01  -2.8007237e+01   3.0000000e+02  -2.5530248e+00   5.3068912e-01   5.1102946e+00
   2.6145445e+01  -2.7911575e+01   3.0000000e+02  -2.6161458e+00   4.8284856e-01   5.0265254e+00
   2.6238805e+01  -2.7813389e+01   3.0000000e+02  -2.6833787e+00   4.4704698e-01   4.9329615e+00
   2.6328707e+01  -2.7712769e+01   3.0000000e+02  -2.7549418e+00   4.2318413e-01   4.8307398e+00
   2.6415077e+01  -2.7609809e+01   3.0000000e+02  -2.8311529e+00   4.1081823e-01   4.7207398e+00
   2.6497849e+01  -2.7504604e+01   3.0000000e+02  -2.9123468e+00   4.0916773e-01   4.6034975e+00
   2.6576956e+01  -2.7397250e+01   3.0000000e+02  -2.9987766e+00   4.1715933e-01   4.4791471e+00
   2.6652337e+01  -2.7287846e+01   3.0000000e+02  -3.0904871e+00   4.3348052e-01   4.3474098e+00
   2.6723936e+01  -2.7176491e+01   3.0000000e+02  -3.1872072e+00   4.5666839e-01   4.2076268e+00
   2.6791700e+01  -2.7063287e+01   3.0000000e+02  -3.2882585e+00   4.8520273e-01   4.0588537e+00
   2.6855579e+01  -2.6948337e+01   3.0000000e+02  -3.3925098e+00   5.1759891e-01   3.8999911e+00
   2.6915529e+01  -2.6831743e+01   3.0000000e+02  -3.4983796e+00   5.5248449e-01   3.7299440e+00
   2.6971508e+01  -2.6713612e+01   3.0000000e+02  -3.6038888e+00   5.8865657e-01   3.5477957e+00
   2.7023479e+01  -2.6594048e+01   3.0000000e+02  -3.7067754e+00   6.2511986e-01   3.3529442e+00
   2.7071409e+01  -2.6473160e+01   3.0000000e+02  -3.8046296e+00   6.6109319e-01   3.1452278e+00
   2.7115268e+01  -2.6351054e+01   3.0000000e+02  -3.8950672e+00   6.9600772e-01   2.9249726e+00
   2.7155030e+01  -2.6227838e+01   3.0000000e+02  -3.9758879e+00   7.2947783e-01   2.6930114e+00
   2.7190675e+01  -2.6103623e+01   3.0000000e+02  -4.0452239e+00   7.6126344e-01   2.4506470e+00
   2.7222184e+01  -2.5978518e+01   3.0000000e+02  -4.1016654e+00   7.9123384e-01   2.1995529e+00
   2.7249543e+01  -2.5852632e+01   3.0000000e+02  -4.1443370e+00   8.1931558e-01   1.9416657e+00
   2.7272741e+01  -2.5726075e+01   3.0000000e+02  -4.1729367e+00   8.4544603e-01   1.6790511e+00
   2.7291773e+01  -2.5598959e+01   3.0000000e+02  -4.1877298e+00   8.6952580e-01   1.4137684e+00
   2.7306634e+01  -2.5471393e+01   3.0000000e+02  -4.1895066e+00   8.9138507e-01   1.1477150e+00
   2.7317326e+01  -2.5343488e+01   3.0000000e+02  -4.1794972e+00   9.1074474e-01   8.8251985e-01
   2.7323852e+01  -2.5215355e+01   3.0000000e+02  -4.1592606e+00   9.2719852e-01   6.1942777e-01
   2.7326221e+01  -2.5087105e+01   3.0000000e+02  -4.1305456e+00   9.4019628e-01   3.5922955e-01
   2.7324443e+01  -2.4958846e+01   3.0000000e+02  -4.0951355e+00   9.4904294e-01   1.0221053e-01
   2.7318532e+01  -2.4830689e+01   3.0000000e+02  -4.0546853e+00   9.5289974e-01  -1.5183047e-01
   2.7308508e+01  -2.4702744e+01   3.0000000e+02  -4.0105626e+00   9.5079563e-01  -4.0353557e-01
   2.7294390e+01  -2.4575119e+01   3.0000000e+02  -3.9637052e+00   9.4164949e-01  -6.5389795e-01
   2.7276203e+01  -2.4447922e+01   3.0000000e+02  -3.9145153e+00   9.2429524e-01  -9.0410222e-01
   2.7253974e+01  -2.4321261e+01   3.0000000e+02  -3.8628019e+00   8.9752255e-01  -1.1553472e+00
   2.7227735e+01  -2.4195243e+01   3.0000000e+02  -3.8077850e+00   8.6012606e-01  -1.4086423e+00
   2.7197519e+01  -2.4069973e+01   3.0000000e+02  -3.7481675e+00   8.1096659e-01  -1.6646180e+00
   2.7163362e+01  -2.3945558e+01   3.0000000e+02  -3.6822754e+00   7.4904011e-01  -1.9233520e+00
   2.7125304e+01  -2.3822100e+01   3.0000000e+02  -3.6082449e+00   6.7354321e-01  -2.1842719e+00
   2.7083388e+01  -2.3699702e+01   3.0000000e+02  -3.5242425e+00   5.8393717e-01  -2.4461149e+00
   2.7037658e+01  -2.3578467e+01   3.0000000e+02  -3.4286771e+00   4.7999220e-01  -2.7069825e+00
   2.6988164e+01  -2.3458495e+01   3.0000000e+02  -3.3203813e+00   3.6180513e-01  -2.9644627e+00
   2.6934955e+01  -2.3339886e+01   3.0000000e+02  -3.1987266e+00   2.2979172e-01  -3.2158079e+00
   2.6878085e+01  -2.3222737e+01   3.0000000e+02  -3.0636717e+00   8.4647230e-02  -3.4581246e+00
   2.6817610e+01  -2.3107144e+01   3.0000000e+02  -2.9157344e+00  -7.2711481e-02  -3.6885516e+00
   2.6753589e+01  -2.2993204e+01   3.0000000e+02  -2.7559105e+00  -2.4121355e-01  -3.9043904e+00
   2.6686081e+01  -2.2881009e+01   3.0000000e+02  -2.5855501e+00  -4.1971225e-01  -4.1031944e+00
   2.6615151e+01  -2.2770651e+01   3.0000000e+02  -2.4062472e+00  -6.0703251e-01  -4.2827759e+00
   2.6540863e+01  -2.2662220e+01   3.0000000e+02  -2.2197277e+00  -8.0201096e-01  -4.4411914e+00
   2.6463287e+01  -2.2555805e+01   3.0000000e+02  -2.0277874e+00  -1.0034984e+00  -4.5766906e+00
   2.6382491e+01  -2.2451492e+01   3.0000000e+02  -1.8322455e+00  -1.2103514e+00  -4.6876789e+00
   2.6298547e+01  -2.2349366e+01   3.0000000e+02  -1.6349487e+00  -1.4213911e+00  -4.7726902e+00
   2.6211531e+01  -2.2249510e+01   3.0000000e+02  -1.4377842e+00  -1.6353608e+00  -4.8304007e+00
   2.6121518e+01  -2.2152005e+01   3.0000000e+02  -1.2426918e+00  -1.8508903e+00  -4.8596752e+00
   2.6028587e+01  -2.2056929e+01   3.0000000e+02  -1.0516819e+00  -2.0664644e+00  -4.8596427e+00
   2.5932816e+01  -2.1964359e+01   3.0000000e+02  -8.6682938e-01  -2.2804173e+00  -4.8297861e+00
   2.5834289e+01  -2.1874369e+01   3.0000000e+02  -6.9026033e-01  -2.4909438e+00  -4.7700435e+00
   2.5733089e+01  -2.1787033e+01   3.0000000e+02  -5.2410958e-01  -2.6961450e+00  -4.6808909e+00
   2.5629301e+01  -2.1702420e+01   3.0000000e+02  -3.7046849e-01  -2.8940961e+00  -4.5634117e+00
   2.5523013e+01  -2.1620598e+01   3.0000000e+02  -2.3132617e-01  -3.0829282e+00  -4.4193366e+00
   2.5414312e+01  -2.1541632e+01   3.0000000e+02  -1.0849449e-01  -3.2609373e+00  -4.2510433e+00
   2.5303289e+01  -2.1465587e+01   3.0000000e+02  -3.5402501e-03  -3.4266911e+00  -4.0615296e+00
   2.5190035e+01  -2.1392522e+01   3.0000000e+02   8.2293781e-02  -3.5791533e+00  -3.8543267e+00
   2.5074643e+01  -2.1322496e+01   3.0000000e+02   1.4815165e-01  -3.7177859e+00  -3.6333811e+00
   2.4957208e+01  -2.1255564e+01   3.0000000e+02   1.9362165e-01  -3.8426394e+00  -3.4028833e+00
   2.4837825e+01  -2.1191781e+01   3.0000000e+02   2.1877362e-01  -3.9544089e+00  -3.1670595e+00
   2.4716590e+01  -2.1131197e+01   3.0000000e+02   2.2417161e-01  -4.0544436e+00  -2.9299355e+00
   2.4593602e+01  -2.1073860e+01   3.0000000e+02   2.1085703e-01  -4.1447003e+00  -2.6950986e+00
   2.4468959e+01  -2.1019816e+01   3.0000000e+02   1.8030259e-01  -4.2276468e+00  -2.4654613e+00
   2.4342761e+01  -2.0969108e+01   3.0000000e+02   1.3433723e-01  -4.3061073e+00  -2.2430731e+00
   2.4215110e+01  -2.0921775e+01   3.0000000e+02   7.5049786e-02  -4.3830706e+00  -2.0289854e+00
   2.4086107e+01  -2.0877856e+01   3.0000000e+02   4.6819100e-03  -4.4614815e+00  -1.8231847e+00
   2.3955855e+01  -2.0837385e+01   3.0000000e+02  -7.4482692e-02  -4.5440218e+00  -1.6246102e+00
   2.3824456e+01  -2.0800394e+01   3.0000000e+02  -1.6021783e-01  -4.6329179e+00  -1.4312376e+00
   2.3692016e+01  -2.0766913e+01   3.0000000e+02  -2.5043442e-01  -4.7297745e+00  -1.2402361e+00
   2.3558639e+01  -2.0736969e+01   3.0000000e+02  -3.4324307e-01  -4.8354612e+00  -1.0481546e+00
   2.3424429e+01  -2.0710584e+01   3.0000000e+02  -4.3698918e-01  -4.9500400e+00  -8.5114842e-01
   2.3289494e+01  -2.0687779e+01   3.0000000e+02  -5.3025875e-01  -5.0727427e+00  -6.4521777e-01
   2.3153938e+01  -2.0668574e+01   3.0000000e+02  -6.2187337e-01  -5.2020010e+00  -4.2642330e-01
   2.3017869e+01  -2.0652982e+01   3.0000000e+02  -7.1086496e-01  -5.3354959e+00  -1.9111549e-01
   2.2881394e+01  -2.0641017e+01   3.0000000e+02  -7.9643723e-01  -5.4702603e+00   6.3887400e-02
   2.2744620e+01  -2.0632688e+01   3.0000000e+02  -8.7792780e-01  -5.6027915e+00   3.4113313e-01
   2.2607654e+01  -2.0628000e+01   3.0000000e+02  -9.5476474e-01  -5.7291900e+00   6.4240664e-01
   2.2470603e+01  -2.0626959e+01   3.0000000e+02  -1.0264232e+00  -5.8453131e+00   9.6864017e-01
   2.2333575e+01  -2.0629565e+01   3.0000000e+02  -1.0923965e+00  -5.9469311e+00   1.3198443e+00
   2.2196678e+01  -2.0635815e+01   3.0000000e+02  -1.1521698e+00  -6.0298962e+00   1.6950871e+00
   2.2060019e+01  -2.0645705e+01   3.0000000e+02  -1.2052050e+00  -6.0903124e+00   2.0925099e+00
   2.1923705e+01  -2.0659227e+01   3.0000000e+02  -1.2509383e+00  -6.1246996e+00   2.5093661e+00
   2.1787844e+01  -2.0676371e+01   3.0000000e+02  -1.2887831e+00  -6.1301558e+00   2.9421032e+00
   2.1652541e+01  -2.0697122e+01   3.0000000e+02  -1.3181439e+00  -6.1045036e+00   3.3864905e+00
   2.1517904e+01  -2.0721465e+01   3.0000000e+02  -1.3384225e+00  -6.0464185e+00   3.8377653e+00
   2.1384039e+01  -2.0749379e+01   3.0000000e+02  -1.3490357e+00  -5.9555178e+00   4.2908327e+00
   2.1251050e+01  -2.0780844e+01   3.0000000e+02  -1.3494136e+00  -5.8324048e+00   4.7404928e+00
   2.1119044e+01  -2.0815834e+01   3.0000000e+02  -1.3390050e+00  -5.6786574e+00   5.1816460e+00
   2.0988125e+01  -2.0854321e+01   3.0000000e+02  -1.3172689e+00  -5.4967438e+00   5.6095389e+00
   2.0858395e+01  -2.0896275e+01   3.0000000e+02  -1.2836649e+00  -5.2898796e+00   6.0199539e+00
   2.0729960e+01  -2.0941663e+01   3.0000000e+02  -1.2376474e+00  -5.0618413e+00   6.4093358e+00
   2.0602920e+01  -2.0990449e+01   3.0000000e+02  -1.1786698e+00  -4.8167204e+00   6.7748985e+00
   2.0477377e+01  -2.1042593e+01   3.0000000e+02  -1.1062004e+00  -4.5586970e+00   7.1146125e+00
   2.0353432e+01  -2.1098055e+01   3.0000000e+02  -1.0197487e+00  -4.2918139e+00   7.4271637e+00
   2.0231184e+01  -2.1156791e+01   3.0000000e+02  -9.1891870e-01  -4.0197915e+00   7.7118439e+00
   2.0110731e+01  -2.1218753e+01   3.0000000e+02  -8.0346701e-01  -3.7459046e+00   7.9684129e+00
   1.9992172e+01  -2.1283893e+01   3.0000000e+02  -6.7335643e-01  -3.4729238e+00   8.1969587e+00
   1.9875602e+01  -2.1352159e+01   3.0000000e+02  -5.2881676e-01  -3.2031001e+00   8.3977716e+00
   1.9761115e+01  -2.1423495e+01   3.0000000e+02  -3.7038332e-01  -2.9382134e+00   8.5712392e+00
   1.9648807e+01  -2.1497846e+01   3.0000000e+02  -1.9890243e-01  -2.6796527e+00   8.7177833e+00
   1.9538769e+01  -2.1575152e+01   3.0000000e+02  -1.5534545e-02  -2.4284857e+00   8.8378287e+00
   1.9431092e+01  -2.1655351e+01   3.0000000e+02   1.7828361e-01  -2.1855550e+00   8.9317948e+00
   1.9325865e+01  -2.1738378e+01   3.0000000e+02   3.8088649e-01  -1.9515452e+00   9.0001075e+00
   1.9223177e+01  -2.1824168e+01   3.0000000e+02   5.9044633e-01  -1.7270419e+00   9.0432165e+00
   1.9123113e+01  -2.1912651e+01   3.0000000e+02   8.0502385e-01  -1.5125593e+00   9.0616127e+00
   1.9025759e+01  -2.2003757e+01   3.0000000e+02   1.0226367e+00  -1.3085704e+00   9.0558392e+00
   1.8931196e+01  -2.2097411e+01   3.0000000e+02   1.2412958e+00  -1.1155032e+00   9.0264982e+00
   1.8839507e+01  -2.2193539e+01   3.0000000e+02   1.4590543e+00  -9.3375560e-01   8.9742477e+00
   1.8750770e+01  -2.2292062e+01   3.0000000e+02   1.6740168e+00  -7.6368003e-01   8.8998011e+00
   1.8665063e+01  -2.2392902e+01   3.0000000e+02   1.8843659e+00  -6.0559330e-01   8.8039192e+00
   1.8582461e+01  -2.2495976e+01   3.0000000e+02   2.0883540e+00  -4.5977224e-01   8.6874143e+00
   1.8503037e+01  -2.2601201e+01   3.0000000e+02   2.2843169e+00  -3.2646161e-01   8.5511510e+00
   1.8426863e+01  -2.2708492e+01   3.0000000e+02   2.4706732e+00  -2.0588307e-01   8.3960592e+00
   1.8354007e+01  -2.2817760e+01   3.0000000e+02   2.6459287e+00  -9.8235125e-02   8.2231531e+00
   1.8284537e+01  -2.2928917e+01   3.0000000e+02   2.8087032e+00  -3.7063349e-03   8.0335427e+00
   1.8218518e+01  -2.3041873e+01   3.0000000e+02   2.9577469e+00   7.7533628e-02   7.8284524e+00
   1.8156010e+01  -2.3156533e+01   3.0000000e+02   3.0919642e+00   1.4534951e-01   7.6092325e+00
   1.8097074e+01  -2.3272805e+01   3.0000000e+02   3.2104579e+00   1.9964057e-01   7.3773395e+00
   1.8041768e+01  -2.3390593e+01   3.0000000e+02   3.3125405e+00   2.4037445e-01   7.1343252e+00
   1.7990146e+01  -2.3509799e+01   3.0000000e+02   3.3977484e+00   2.6761294e-01   6.8817958e+00
   1.7942261e+01  -2.3630324e+01   3.0000000e+02   3.4658372e+00   2.8152747e-01   6.6213639e+00
   1.7898162e+01  -2.3752070e+01   3.0000000e+02   3.5167526e+00   2.8242040e-01   6.3545955e+00
   1.7857895e+01  -2.3874935e+01   3.0000000e+02   3.5505808e+00   2.7073443e-01   6.0829810e+00
   1.7821506e+01  -2.3998817e+01   3.0000000e+02   3.5674942e+00   2.4703967e-01   5.8079050e+00
   1.7789035e+01  -2.4123612e+01   3.0000000e+02   3.5676857e+00   2.1203557e-01   5.5306526e+00
   1.7760520e+01  -2.4249215e+01   3.0000000e+02   3.5513211e+00   1.6651984e-01   5.2524334e+00
   1.7735997e+01  -2.4375522e+01   3.0000000e+02   3.5185103e+00   1.1136066e-01   4.9744228e+00
   1.7715499e+01  -2.4502426e+01   3.0000000e+02   3.4693070e+00   4.7475826e-02   4.6978256e+00
   1.7699054e+01  -2.4629820e+01   3.0000000e+02   3.4037385e+00  -2.4189211e-02   4.4239209e+00
   1.7686689e+01  -2.4757596e+01   3.0000000e+02   3.3218678e+00  -1.0268897e-01   4.1540975e+00
   1.7678427e+01  -2.4885645e+01   3.0000000e+02   3.2238666e+00  -1.8708451e-01   3.8898599e+00
   1.7674288e+01  -2.5013859e+01   3.0000000e+02   3.1100930e+00  -2.7645608e-01   3.6327984e+00
   1.7674287e+01  -2.5142128e+01   3.0000000e+02   2.9811600e+00  -3.6990166e-01   3.3845393e+00
   1.7678438e+01  -2.5270341e+01   3.0000000e+02   2.8379838e+00  -4.6655231e-01   3.1466599e+00
   1.7686750e+01  -2.5398390e+01   3.0000000e+02   2.6817915e+00  -5.6557150e-01   2.9205894e+00
   1.7699230e+01  -2.5526163e+01   3.0000000e+02   2.5141146e+00  -6.6616544e-01   2.7075254e+00
   1.7715881e+01  -2.5653549e+01   3.0000000e+02   2.3367353e+00  -7.6759146e-01   2.5083405e+00
   1.7736700e+01  -2.5780439e+01   3.0000000e+02   2.1516113e+00  -8.6916271e-01   2.3235166e+00
   1.7761684e+01  -2.5906722e+01   3.0000000e+02   1.9607938e+00  -9.7026601e-01   2.1531060e+00
   1.7790825e+01  -2.6032286e+01   3.0000000e+02   1.7663212e+00  -1.0703516e+00   1.9967178e+00
   1.7824110e+01  -2.6157023e+01   3.0000000e+02   1.5701047e+00  -1.1689272e+00   1.8535296e+00
   1.7861523e+01  -2.6280823e+01   3.0000000e+02   1.3738332e+00  -1.2655447e+00   1.7223377e+00
   1.7903046e+01  -2.6403575e+01   3.0000000e+02   1.1788777e+00  -1.3597804e+00   1.6016282e+00
   1.7948655e+01  -2.6525172e+01   3.0000000e+02   9.8620501e-01  -1.4512004e+00   1.4896753e+00
   1.7998322e+01  -2.6645506e+01   3.0000000e+02   7.9633528e-01  -1.5393387e+00   1.3846612e+00
   1.8052016e+01  -2.6764468e+01   3.0000000e+02   6.0932150e-01  -1.6236793e+00   1.2848021e+00
   1.8109704e+01  -2.6881953e+01   3.0000000e+02   4.2475768e-01  -1.7036452e+00   1.1884736e+00
   1.8171344e+01  -2.6997854e+01   3.0000000e+02   2.4184267e-01  -1.7785869e+00   1.0943393e+00
   1.8236896e+01  -2.7112068e+01   3.0000000e+02   5.9456158e-02  -1.8478135e+00   1.0014332e+00
   1.8306311e+01  -2.7224492e+01   3.0000000e+02  -1.2371704e-01  -1.9105989e+00   9.0924088e-01
   1.8379539e+01  -2.7335022e+01   3.0000000e+02  -3.0905429e-01  -1.9662315e+00   8.1772026e-01
   1.8456526e+01  -2.7443559e+01   3.0000000e+02  -4.9786041e-01  -2.0140470e+00   7.2729705e-01
   1.8537213e+01  -2.7550003e+01   3.0000000e+02  -6.9122067e-01  -2.0534743e+00   6.3881918e-01
   1.8621536e+01  -2.7654256e+01   3.0000000e+02  -8.8988180e-01  -2.0840766e+00   5.5347399e-01
   1.8709430e+01  -2.7756224e+01   3.0000000e+02  -1.0941609e+00  -2.1055913e+00   4.7267098e-01
   1.8800824e+01  -2.7855811e+01   3.0000000e+02  -1.3038721e+00  -2.1179512e+00   3.9791211e-01
   1.8895644e+01  -2.7952925e+01   3.0000000e+02  -1.5183165e+00  -2.1212932e+00   3.3064421e-01
   1.8993812e+01  -2.8047477e+01   3.0000000e+02  -1.7363021e+00  -2.1159454e+00   2.7211750e-01
   1.9095245e+01  -2.8139378e+01   3.0000000e+02  -1.9562045e+00  -2.1023980e+00   2.2325677e-01
   1.9199858e+01  -2.8228542e+01   3.0000000e+02  -2.1760726e+00  -2.0812509e+00   1.8456043e-01
   1.9307562e+01  -2.8314886e+01   3.0000000e+02  -2.3937526e+00  -2.0531430e+00   1.5604565e-01
   1.9418263e+01  -2.8398328e+01   3.0000000e+02  -2.6070189e+00  -2.0186761e+00   1.3723671e-01
   1.9531865e+01  -2.8478790e+01   3.0000000e+02  -2.8137129e+00  -1.9783339e+00   1.2720476e-01
   1.9648269e+01  -2.8556195e+01   3.0000000e+02  -3.0118506e+00  -1.9324132e+00   1.2465039e-01
   1.9767369e+01  -2.8630471e+01   3.0000000e+02  -3.1997055e+00  -1.8809647e+00   1.2803774e-01
   1.9889061e+01  -2.8701547e+01   3.0000000e+02  -3.3758593e+00  -1.8237724e+00   1.3571952e-01
   2.0013234e+01  -2.8769354e+01   3.0000000e+02  -3.5392031e+00  -1.7603479e+00   1.4609847e-01
   2.0139775e+01  -2.8833829e+01   3.0000000e+02  -3.6889186e+00  -1.6899555e+00   1.5776941e-01
   2.0268567e+01  -2.8894909e+01   3.0000000e+02  -3.8244218e+00  -1.6116678e+00   1.6962300e-01
   2.0399494e+01  -2.8952536e+01   3.0000000e+02  -3.9453039e+00  -1.5244248e+00   1.8093697e-01
   2.0532431e+01  -2.9006654e+01   3.0000000e+02  -4.0512524e+00  -1.4271122e+00   1.9143239e-01
   2.0667257e+01  -2.9057212e+01   3.0000000e+02  -4.1419985e+00  -1.3186264e+00   2.0129155e-01
   2.0803844e+01  -2.9104160e+01   3.0000000e+02  -4.2172603e+00  -1.1979493e+00   2.1116116e-01
   2.0942063e+01  -2.9147453e+01   3.0000000e+02  -4.2767173e+00  -1.0642049e+00   2.2214693e-01
   2.1081784e+01  -2.9187049e+01   3.0000000e+02  -4.3200027e+00  -9.1671910e-01   2.3579124e-01
   2.1222873e+01  -2.9222910e+01   3.0000000e+02  -4.3467154e+00  -7.5508555e-01   2.5405730e-01
   2.1365196e+01  -2.9255000e+01   3.0000000e+02  -4.3564558e+00  -5.7923470e-01   2.7929082e-01
   2.1508616e+01  -2.9283290e+01   3.0000000e+02  -4.3488756e+00  -3.8952142e-01   3.1419270e-01
   2.1652996e+01  -2.9307750e+01   3.0000000e+02  -4.3237449e+00  -1.8681738e-01   3.6171963e-01
   2.1798196e+01  -2.9328358e+01   3.0000000e+02  -4.2810242e+00   2.7389108e-02   4.2500076e-01
   2.1944077e+01  -2.9345093e+01   3.0000000e+02  -4.2209439e+00   2.5091887e-01   5.0715698e-01
   2.2090497e+01  -2.9357939e+01   3.0000000e+02  -4.1440776e+00   4.8085081e-01   6.1110970e-01
   2.2237314e+01  -2.9366883e+01   3.0000000e+02  -4.0514042e+00   7.1353866e-01   7.3933822e-01
   2.2384387e+01  -2.9371917e+01   3.0000000e+02  -3.9443458e+00   9.4469410e-01   8.9363892e-01
   2.2531571e+01  -2.9373035e+01   3.0000000e+02  -3.8247826e+00   1.1695401e+00   1.0748814e+00
   2.2678725e+01  -2.9370237e+01   3.0000000e+02  -3.6950181e+00   1.3830493e+00   1.2828441e+00
   2.2825705e+01  -2.9363525e+01   3.0000000e+02  -3.5577221e+00   1.5802175e+00   1.5160894e+00
   2.2972370e+01  -2.9352906e+01   3.0000000e+02  -3.4158220e+00   1.7563735e+00   1.7719677e+00
   2.3118576e+01  -2.9338390e+01   3.0000000e+02  -3.2723811e+00   1.9074693e+00   2.0466915e+00
   2.3264182e+01  -2.9319991e+01   3.0000000e+02  -3.1304478e+00   2.0303406e+00   2.3355348e+00
   2.3409047e+01  -2.9297728e+01   3.0000000e+02  -2.9929134e+00   2.1228881e+00   2.6330910e+00
   2.3553033e+01  -2.9271622e+01   3.0000000e+02  -2.8623821e+00   2.1841834e+00   2.9335887e+00
   2.3695999e+01  -2.9241698e+01   3.0000000e+02  -2.7410740e+00   2.2144724e+00   3.2312122e+00
   2.3837809e+01  -2.9207986e+01   3.0000000e+02  -2.6307489e+00   2.2150943e+00   3.5204368e+00
   2.3978328e+01  -2.9170519e+01   3.0000000e+02  -2.5326859e+00   2.1883259e+00   3.7962895e+00
   2.4117420e+01  -2.9129332e+01   3.0000000e+02  -2.4476966e+00   2.1371741e+00   4.0545494e+00
   2.4254955e+01  -2.9084465e+01   3.0000000e+02  -2.3761543e+00   2.0651283e+00   4.2918912e+00
   2.4390802e+01  -2.9035963e+01   3.0000000e+02  -2.3180617e+00   1.9759240e+00   4.5059122e+00
   2.4524833e+01  -2.8983872e+01   3.0000000e+02  -2.2731244e+00   1.8733246e+00   4.6951048e+00
   2.4656923e+01  -2.8928242e+01   3.0000000e+02  -2.2408203e+00   1.7609376e+00   4.8587653e+00
   2.4786949e+01  -2.8869127e+01   3.0000000e+02  -2.2204676e+00   1.6420876e+00   4.9968582e+00
   2.4914790e+01  -2.8806583e+01   3.0000000e+02  -2.2112842e+00   1.5197442e+00   5.1098633e+00
   2.5040329e+01  -2.8740671e+01   3.0000000e+02  -2.2124263e+00   1.3964920e+00   5.1986316e+00
   2.5163451e+01  -2.8671454e+01   3.0000000e+02  -2.2230276e+00   1.2745525e+00   5.2642491e+00
   2.5837641e+01  -2.8373015e+01   3.0000000e+02  -2.1535075e+00   5.0060703e-01   5.3899757e+00
   2.5944205e+01  -2.8285289e+01   3.0000000e+02  -2.2050629e+00   4.2005693e-01   5.3408386e+00
   2.6047713e+01  -2.8194849e+01   3.0000000e+02  -2.2607695e+00   3.5040198e-01   5.2791651e+00
   2.6148081e+01  -2.8101775e+01   3.0000000e+02  -2.3203368e+00   2.9241674e-01   5.2064268e+00
   2.6245230e+01  -2.8006149e+01   3.0000000e+02  -2.3836809e+00   2.4665416e-01   5.1241038e+00
   2.6339083e+01  -2.7908057e+01   3.0000000e+02  -2.4509328e+00   2.1338776e-01   5.0336145e+00
   2.6429569e+01  -2.7807585e+01   3.0000000e+02  -2.5224229e+00   1.9255955e-01   4.9362167e+00
   2.6516617e+01  -2.7704820e+01   3.0000000e+02  -2.5986361e+00   1.8375823e-01   4.8329005e+00
   2.6600162e+01  -2.7599852e+01   3.0000000e+02  -2.6801190e+00   1.8620930e-01   4.7242869e+00
   2.6680143e+01  -2.7492774e+01   3.0000000e+02  -2.7673701e+00   1.9881145e-01   4.6105519e+00
   2.6756501e+01  -2.7383677e+01   3.0000000e+02  -2.8607198e+00   2.2020824e-01   4.4913867e+00
   2.6829181e+01  -2.7272657e+01   3.0000000e+02  -2.9601880e+00   2.4886623e-01   4.3660272e+00
   2.6898132e+01  -2.7159809e+01   3.0000000e+02  -3.0653833e+00   2.8318090e-01   4.2333285e+00
   2.6963308e+01  -2.7045230e+01   3.0000000e+02  -3.1754233e+00   3.2157208e-01   4.0919008e+00
   2.7024665e+01  -2.6929018e+01   3.0000000e+02  -3.2889171e+00   3.6257543e-01   3.9402777e+00
   2.7082162e+01  -2.6811273e+01   3.0000000e+02  -3.4039974e+00   4.0490732e-01   3.7771011e+00
   2.7135765e+01  -2.6692094e+01   3.0000000e+02  -3.5184117e+00   4.4750562e-01   3.6012923e+00
   2.7185439e+01  -2.6571583e+01   3.0000000e+02  -3.6296582e+00   4.8955122e-01   3.4121990e+00
   2.7231156e+01  -2.6449842e+01   3.0000000e+02  -3.7351493e+00   5.3045744e-01   3.2096899e+00
   2.7272890e+01  -2.6326972e+01   3.0000000e+02  -3.8323917e+00   5.6985179e-01   2.9941915e+00
   2.7310620e+01  -2.6203078e+01   3.0000000e+02  -3.9191482e+00   6.0753318e-01   2.7666849e+00
   2.7344327e+01  -2.6078262e+01   3.0000000e+02  -3.9935922e+00   6.4343313e-01   2.5286256e+00
   2.7373997e+01  -2.5952629e+01   3.0000000e+02  -4.0544120e+00   6.7755855e-01   2.2818525e+00
   2.7399618e+01  -2.5826283e+01   3.0000000e+02  -4.1008846e+00   7.0994384e-01   2.0284447e+00
   2.7421182e+01  -2.5699329e+01   3.0000000e+02  -4.1328978e+00   7.4059734e-01   1.7705794e+00
   2.7438684e+01  -2.5571871e+01   3.0000000e+02  -4.1509324e+00   7.6945724e-01   1.5103756e+00
   2.7452124e+01  -2.5444014e+01   3.0000000e+02  -4.1560009e+00   7.9635185e-01   1.2497565e+00
   2.7461504e+01  -2.5315862e+01   3.0000000e+02  -4.1495527e+00   8.2097564e-01   9.9031515e-01
   2.7466828e+01  -2.5187521e+01   3.0000000e+02  -4.1333490e+00   8.4287261e-01   7.3321796e-01
   2.7468106e+01  -2.5059095e+01   3.0000000e+02  -4.1093134e+00   8.6142989e-01   4.7913020e-01
   2.7465348e+01  -2.4930688e+01   3.0000000e+02  -4.0793699e+00   8.7588594e-01   2.2818090e-01
   2.7458571e+01  -2.4802405e+01   3.0000000e+02  -4.0452742e+00   8.8533875e-01  -2.0014912e-02
   2.7447792e+01  -2.4674347e+01   3.0000000e+02  -4.0084503e+00   8.8876913e-01  -2.6631442e-01
   2.7433031e+01  -2.4546619e+01   3.0000000e+02  -3.9698493e+00   8.8506322e-01  -5.1191927e-01
   2.7414313e+01  -2.4419322e+01   3.0000000e+02  -3.9298399e+00   8.7304328e-01  -7.5823224e-01
   2.7391663e+01  -2.4292559e+01   3.0000000e+02  -3.8881514e+00   8.5150963e-01  -1.0066622e+00
   2.7365113e+01  -2.4166431e+01   3.0000000e+02  -3.8438799e+00   8.1928632e-01  -1.2584111e+00
   2.7334694e+01  -2.4041037e+01   3.0000000e+02  -3.7955616e+00   7.7528087e-01  -1.5142795e+00
   2.7300442e+01  -2.3916477e+01   3.0000000e+02  -3.7413193e+00   7.1854708e-01  -1.7744794e+00
   2.7262393e+01  -2.3792850e+01   3.0000000e+02  -3.6790573e+00   6.4835005e-01  -2.0385296e+00
   2.7220590e+01  -2.3670253e+01   3.0000000e+02  -3.6066931e+00   5.6422182e-01  -2.3052106e+00
   2.7175073e+01  -2.3548782e+01   3.0000000e+02  -3.5223795e+00   4.6600395e-01  -2.5726264e+00
   2.7125890e+01  -2.3428533e+01   3.0000000e+02  -3.4247053e+00   3.5386538e-01  -2.8383136e+00
   2.7073088e+01  -2.3309600e+01   3.0000000e+02  -3.3128209e+00   2.2828987e-01  -3.0994400e+00
   2.7016717e+01  -2.3192075e+01   3.0000000e+02  -3.1864974e+00   9.0035508e-02  -3.3530032e+00
   2.6956831e+01  -2.3076050e+01   3.0000000e+02  -3.0461097e+00  -5.9926042e-02  -3.5960170e+00
   2.6893483e+01  -2.2961615e+01   3.0000000e+02  -2.8925492e+00  -2.2048957e-01  -3.8256690e+00
   2.6826733e+01  -2.2848859e+01   3.0000000e+02  -2.7271159e+00  -3.9049021e-01  -4.0393984e+00
   2.6756638e+01  -2.2737870e+01   3.0000000e+02  -2.5513804e+00  -5.6877225e-01  -4.2349323e+00
   2.6683260e+01  -2.2628732e+01   3.0000000e+02  -2.3670791e+00  -7.5423308e-01  -4.4102578e+00
   2.6606664e+01  -2.2521530e+01   3.0000000e+02  -2.1760358e+00  -9.4583163e-01  -4.5635666e+00
   2.6526914e+01  -2.2416347e+01   3.0000000e+02  -1.9801096e+00  -1.1425810e+00  -4.6932053e+00
   2.6444079e+01  -2.2313262e+01   3.0000000e+02  -1.7811883e+00  -1.3435100e+00  -4.7976373e+00
   2.6358228e+01  -2.2212356e+01   3.0000000e+02  -1.5811962e+00  -1.5476065e+00  -4.8754342e+00
   2.6269433e+01  -2.2113705e+01   3.0000000e+02  -1.3821086e+00  -1.7537694e+00  -4.9253140e+00
   2.6177765e+01  -2.2017385e+01   3.0000000e+02  -1.1859654e+00  -1.9607587e+00  -4.9462006e+00
   2.6083302e+01  -2.1923469e+01   3.0000000e+02  -9.9487922e-01  -2.1671612e+00  -4.9373180e+00
   2.5986118e+01  -2.1832028e+01   3.0000000e+02  -8.1100930e-01  -2.3713938e+00  -4.8982832e+00
   2.5886293e+01  -2.1743133e+01   3.0000000e+02  -6.3654373e-01  -2.5717118e+00  -4.8292063e+00
   2.5783907e+01  -2.1656850e+01   3.0000000e+02  -4.7364276e-01  -2.7662673e+00  -4.7307703e+00
   2.5679040e+01  -2.1573246e+01   3.0000000e+02  -3.2438779e-01  -2.9531752e+00  -4.6042878e+00
   2.5571775e+01  -2.1492382e+01   3.0000000e+02  -1.9071372e-01  -3.1306091e+00  -4.4517330e+00
   2.5462197e+01  -2.1414322e+01   3.0000000e+02  -7.4344221e-02  -3.2969044e+00  -4.2757375e+00
   2.5350392e+01  -2.1339122e+01   3.0000000e+02   2.3288054e-02  -3.4506856e+00  -4.0795424e+00
   2.5236446e+01  -2.1266841e+01   3.0000000e+02   1.0110494e-01  -3.5909798e+00  -3.8669112e+00
   2.5120447e+01  -2.1197533e+01   3.0000000e+02   1.5844863e-01  -3.7173299e+00  -3.6419970e+00
   2.5002485e+01  -2.1131250e+01   3.0000000e+02   1.9512943e-01  -3.8298806e+00  -3.4091660e+00
   2.4882651e+01  -2.1068041e+01   3.0000000e+02   2.1145513e-01  -3.9294327e+00  -3.1727807e+00
   2.4761035e+01  -2.1007955e+01   3.0000000e+02   2.0823282e-01  -4.0174499e+00  -2.9369577e+00
   2.4637732e+01  -2.0951037e+01   3.0000000e+02   1.8674049e-01  -4.0960064e+00  -2.7053303e+00
   2.4512833e+01  -2.0897328e+01   3.0000000e+02   1.4866592e-01  -4.1676877e+00  -2.4808052e+00
   2.4386435e+01  -2.0846871e+01   3.0000000e+02   9.6021961e-02  -4.2354291e+00  -2.2653928e+00
   2.4258631e+01  -2.0799701e+01   3.0000000e+02   3.1034516e-02  -4.3023272e+00  -2.0600589e+00
   2.4129519e+01  -2.0755855e+01   3.0000000e+02  -4.3968236e-02  -4.3714232e+00  -1.8646873e+00
   2.3999195e+01  -2.0715366e+01   3.0000000e+02  -1.2667399e-01  -4.4454928e+00  -1.6780887e+00
   2.3867758e+01  -2.0678263e+01   3.0000000e+02  -2.1488553e-01  -4.5268484e+00  -1.4981033e+00
   2.3735304e+01  -2.0644575e+01   3.0000000e+02  -3.0660054e-01  -4.6171864e+00  -1.3217467e+00
   2.3601934e+01  -2.0614326e+01   3.0000000e+02  -4.0006359e-01  -4.7174616e+00  -1.1454196e+00
   2.3467746e+01  -2.0587540e+01   3.0000000e+02  -4.9379339e-01  -4.8278286e+00  -9.6511830e-01
   2.3332841e+01  -2.0564237e+01   3.0000000e+02  -5.8658304e-01  -4.9476122e+00  -7.7667593e-01
   2.3197319e+01  -2.0544433e+01   3.0000000e+02  -6.7748240e-01  -5.0753315e+00  -5.7598337e-01
   2.3061279e+01  -2.0528143e+01   3.0000000e+02  -7.6576074e-01  -5.2087593e+00  -3.5919722e-01
   2.2924824e+01  -2.0515380e+01   3.0000000e+02  -8.5085884e-01  -5.3450036e+00  -1.2293472e-01
   2.2788054e+01  -2.0506154e+01   3.0000000e+02  -9.3234321e-01  -5.4806270e+00   1.3557901e-01
   2.2651071e+01  -2.0500470e+01   3.0000000e+02  -1.0098537e+00  -5.6117700e+00   4.1837335e-01
   2.2513977e+01  -2.0498334e+01   3.0000000e+02  -1.0830552e+00  -5.7343015e+00   7.2664672e-01
   2.2376871e+01  -2.0499747e+01   3.0000000e+02  -1.1516041e+00  -5.8439702e+00   1.0607073e+00
   2.2239857e+01  -2.0504707e+01   3.0000000e+02  -1.2151155e+00  -5.9365566e+00   1.4199263e+00
   2.2103036e+01  -2.0513212e+01   3.0000000e+02  -1.2731501e+00  -6.0080417e+00   1.8027627e+00
   2.1966508e+01  -2.0525255e+01   3.0000000e+02  -1.3252122e+00  -6.0547625e+00   2.2067870e+00
   2.1830376e+01  -2.0540826e+01   3.0000000e+02  -1.3707541e+00  -6.0735687e+00   2.6287383e+00
   2.1694740e+01  -2.0559915e+01   3.0000000e+02  -1.4091910e+00  -6.0619773e+00   3.0646471e+00
   2.1559701e+01  -2.0582506e+01   3.0000000e+02  -1.4399212e+00  -6.0183028e+00   3.5099541e+00
   2.1425359e+01  -2.0608584e+01   3.0000000e+02  -1.4623379e+00  -5.9417689e+00   3.9597009e+00
   2.1291814e+01  -2.0638128e+01   3.0000000e+02  -1.4758452e+00  -5.8325753e+00   4.4087234e+00
   2.1159165e+01  -2.0671117e+01   3.0000000e+02  -1.4798566e+00  -5.6919142e+00   4.8518912e+00
   2.1027513e+01  -2.0707526e+01   3.0000000e+02  -1.4737920e+00  -5.5219256e+00   5.2843241e+00
   2.0896954e+01  -2.0747327e+01   3.0000000e+02  -1.4570669e+00  -5.3255739e+00   5.7016272e+00
   2.0767587e+01  -2.0790492e+01   3.0000000e+02  -1.4290732e+00  -5.1064822e+00   6.1000451e+00
   2.0639509e+01  -2.0836986e+01   3.0000000e+02  -1.3891789e+00  -4.8687002e+00   6.4765790e+00
   2.0512816e+01  -2.0886777e+01   3.0000000e+02  -1.3367187e+00  -4.6164585e+00   6.8290392e+00
   2.0387604e+01  -2.0939826e+01   3.0000000e+02  -1.2710249e+00  -4.3539232e+00   7.1559944e+00
   2.0263968e+01  -2.0996093e+01   3.0000000e+02  -1.1914594e+00  -4.0849794e+00   7.4566867e+00
   2.0142001e+01  -2.1055537e+01   3.0000000e+02  -1.0974695e+00  -3.8130660e+00   7.7308898e+00
   2.0021796e+01  -2.1118113e+01   3.0000000e+02  -9.8866147e-01  -3.5410825e+00   7.9787398e+00
   1.9903445e+01  -2.1183773e+01   3.0000000e+02  -8.6487002e-01  -3.2713576e+00   8.2005827e+00
   1.9787039e+01  -2.1252469e+01   3.0000000e+02  -7.2621437e-01  -3.0056805e+00   8.3968475e+00
   1.9672667e+01  -2.1324148e+01   3.0000000e+02  -5.7315027e-01  -2.7453729e+00   8.5679517e+00
   1.9560418e+01  -2.1398757e+01   3.0000000e+02  -4.0647714e-01  -2.4913929e+00   8.7142568e+00
   1.9450379e+01  -2.1476239e+01   3.0000000e+02  -2.2733409e-01  -2.2444362e+00   8.8360566e+00
   1.9342636e+01  -2.1556536e+01   3.0000000e+02  -3.7156113e-02  -2.0050329e+00   8.9335973e+00
   1.9237273e+01  -2.1639587e+01   3.0000000e+02   1.6237929e-01  -1.7736219e+00   9.0071082e+00
   1.9134374e+01  -2.1725329e+01   3.0000000e+02   3.6942235e-01  -1.5506076e+00   9.0568381e+00
   1.9034020e+01  -2.1813697e+01   3.0000000e+02   5.8202160e-01  -1.3363836e+00   9.0830855e+00
   1.8936292e+01  -2.1904624e+01   3.0000000e+02   7.9818768e-01  -1.1313504e+00   9.0862167e+00
   1.8841268e+01  -2.1998041e+01   3.0000000e+02   1.0159458e+00  -9.3590909e-01   9.0666732e+00
   1.8749024e+01  -2.2093877e+01   3.0000000e+02   1.2333728e+00  -7.5045563e-01   9.0249694e+00
   1.8659637e+01  -2.2192059e+01   3.0000000e+02   1.4486201e+00  -5.7537872e-01   8.9616838e+00
   1.8573180e+01  -2.2292512e+01   3.0000000e+02   1.6599225e+00  -4.1104373e-01   8.8774497e+00
   1.8489724e+01  -2.2395159e+01   3.0000000e+02   1.8655989e+00  -2.5779523e-01   8.7729488e+00
   1.8409340e+01  -2.2499921e+01   3.0000000e+02   2.0640477e+00  -1.1596403e-01   8.6489122e+00
   1.8332096e+01  -2.2606718e+01   3.0000000e+02   2.2537447e+00   1.4132221e-02   8.5061278e+00
   1.8258057e+01  -2.2715467e+01   3.0000000e+02   2.4332397e+00   1.3218283e-01   8.3454600e+00
   1.8187288e+01  -2.2826087e+01   3.0000000e+02   2.6011760e+00   2.3787278e-01   8.1678654e+00
   1.8119850e+01  -2.2938489e+01   3.0000000e+02   2.7562915e+00   3.3089612e-01   7.9744283e+00
   1.8055804e+01  -2.3052589e+01   3.0000000e+02   2.8974703e+00   4.1095347e-01   7.7663587e+00
   1.7995208e+01  -2.3168297e+01   3.0000000e+02   3.0237568e+00   4.7778076e-01   7.5450107e+00
   1.7938116e+01  -2.3285523e+01   3.0000000e+02   3.1343972e+00   5.3117458e-01   7.3118599e+00
   1.7884582e+01  -2.3404177e+01   3.0000000e+02   3.2288625e+00   5.7101268e-01   7.0684711e+00
   1.7834657e+01  -2.3524166e+01   3.0000000e+02   3.3068501e+00   5.9729081e-01   6.8164566e+00
   1.7788390e+01  -2.3645395e+01   3.0000000e+02   3.3682705e+00   6.1014394e-01   6.5574205e+00
   1.7745825e+01  -2.3767771e+01   3.0000000e+02   3.4132101e+00   6.0986447e-01   6.2928972e+00
   1.7707008e+01  -2.3891196e+01   3.0000000e+02   3.4418740e+00   5.9689503e-01   6.0243294e+00
   1.7671979e+01  -2.4015573e+01   3.0000000e+02   3.4545178e+00   5.7183265e-01   5.7530376e+00
   1.7640775e+01  -2.4140805e+01   3.0000000e+02   3.4513838e+00   5.3540325e-01   5.4802334e+00
   1.7613434e+01  -2.4266792e+01   3.0000000e+02   3.4326547e+00   4.8842837e-01   5.2070638e+00
   1.7589987e+01  -2.4393434e+01   3.0000000e+02   3.3984249e+00   4.3181050e-01   4.9346574e+00
   1.7570465e+01  -2.4520629e+01   3.0000000e+02   3.3487168e+00   3.6648974e-01   4.6641902e+00
   1.7554895e+01  -2.4648278e+01   3.0000000e+02   3.2835182e+00   2.9342321e-01   4.3969257e+00
   1.7543302e+01  -2.4776277e+01   3.0000000e+02   3.2028549e+00   2.1356807e-01   4.1342612e+00
   1.7535707e+01  -2.4904523e+01   3.0000000e+02   3.1068698e+00   1.2786744e-01   3.8777123e+00
   1.7532129e+01  -2.5032913e+01   3.0000000e+02   2.9959054e+00   3.7238144e-02   3.6288789e+00
   1.7532583e+01  -2.5161344e+01   3.0000000e+02   2.8705675e+00  -5.7430678e-02   3.3893780e+00
   1.7537082e+01  -2.5289710e+01   3.0000000e+02   2.7317702e+00  -1.5528575e-01   3.1607611e+00
   1.7545634e+01  -2.5417909e+01   3.0000000e+02   2.5807341e+00  -2.5551493e-01   2.9444046e+00
   1.7558246e+01  -2.5545834e+01   3.0000000e+02   2.4189744e+00  -3.5735930e-01   2.7414309e+00
   1.7574920e+01  -2.5673382e+01   3.0000000e+02   2.2482350e+00  -4.6011998e-01   2.5526149e+00
   1.7595657e+01  -2.5800448e+01   3.0000000e+02   2.0704224e+00  -5.6317227e-01   2.3783350e+00
   1.7620451e+01  -2.5926927e+01   3.0000000e+02   1.8875113e+00  -6.6595838e-01   2.2185403e+00
   1.7649296e+01  -2.6052713e+01   3.0000000e+02   1.7014511e+00  -7.6800045e-01   2.0727440e+00
   1.7682181e+01  -2.6177704e+01   3.0000000e+02   1.5140560e+00  -8.6887961e-01   1.9400444e+00
   1.7719093e+01  -2.6301795e+01   3.0000000e+02   1.3269215e+00  -9.6821986e-01   1.8191796e+00
   1.7760012e+01  -2.6424881e+01   3.0000000e+02   1.1413323e+00  -1.0656512e+00   1.7086023e+00
   1.7804919e+01  -2.6546861e+01   3.0000000e+02   9.5818648e-01  -1.1607954e+00   1.6065683e+00
   1.7853789e+01  -2.6667631e+01   3.0000000e+02   7.7795717e-01  -1.2532211e+00   1.5112592e+00
   1.7906593e+01  -2.6787090e+01   3.0000000e+02   6.0066384e-01  -1.3424255e+00   1.4209007e+00
   1.7963299e+01  -2.6905135e+01   3.0000000e+02   4.2589215e-01  -1.4278252e+00   1.3338878e+00
   1.8023872e+01  -2.7021668e+01   3.0000000e+02   2.5283060e-01  -1.5087560e+00   1.2488960e+00
   1.8088273e+01  -2.7136588e+01   3.0000000e+02   8.0361086e-02  -1.5844897e+00   1.1649788e+00
   1.8156458e+01  -2.7249797e+01   3.0000000e+02  -9.2842609e-02  -1.6542601e+00   1.0816321e+00
   1.8228383e+01  -2.7361197e+01   3.0000000e+02  -2.6818695e-01  -1.7173120e+00   9.9882087e-01
   1.8303995e+01  -2.7470694e+01   3.0000000e+02  -4.4702529e-01  -1.7729305e+00   9.1698206e-01
   1.8383241e+01  -2.7578191e+01   3.0000000e+02  -6.3051849e-01  -1.8205077e+00   8.3697075e-01
   1.8466065e+01  -2.7683597e+01   3.0000000e+02  -8.1952398e-01  -1.8595769e+00   7.5998539e-01
   1.8552404e+01  -2.7786818e+01   3.0000000e+02  -1.0144815e+00  -1.8898508e+00   6.8746391e-01
   1.8642194e+01  -2.7887765e+01   3.0000000e+02  -1.2153582e+00  -1.9112504e+00   6.2094888e-01
   1.8735367e+01  -2.7986350e+01   3.0000000e+02  -1.4216101e+00  -1.9239130e+00   5.6194925e-01
   1.8831850e+01  -2.8082485e+01   3.0000000e+02  -1.6321893e+00  -1.9281846e+00   5.1179860e-01
   1.8931569e+01  -2.8176085e+01   3.0000000e+02  -1.8456023e+00  -1.9245931e+00   4.7152166e-01
   1.9034443e+01  -2.8267069e+01   3.0000000e+02  -2.0599939e+00  -1.9137936e+00   4.4173803e-01
   1.9140391e+01  -2.8355355e+01   3.0000000e+02  -2.2732634e+00  -1.8965163e+00   4.2257898e-01
   1.9249326e+01  -2.8440864e+01   3.0000000e+02  -2.4831968e+00  -1.8734826e+00   4.1367177e-01
   1.9361160e+01  -2.8523521e+01   3.0000000e+02  -2.6876072e+00  -1.8453288e+00   4.1415742e-01
   1.9475799e+01  -2.8603251e+01   3.0000000e+02  -2.8844479e+00  -1.8125328e+00   4.2275795e-01
   1.9593148e+01  -2.8679982e+01   3.0000000e+02  -3.0719187e+00  -1.7753532e+00   4.3788035e-01
   1.9713108e+01  -2.8753646e+01   3.0000000e+02  -3.2485274e+00  -1.7337851e+00   4.5775562e-01
   1.9835577e+01  -2.8824176e+01   3.0000000e+02  -3.4131139e+00  -1.6875485e+00   4.8057660e-01
   1.9960450e+01  -2.8891508e+01   3.0000000e+02  -3.5648426e+00  -1.6360979e+00   5.0464314e-01
   2.0087619e+01  -2.8955581e+01   3.0000000e+02  -3.7031602e+00  -1.5786566e+00   5.2848663e-01
   2.0216974e+01  -2.9016337e+01   3.0000000e+02  -3.8277337e+00  -1.5142718e+00   5.5096620e-01
   2.0348402e+01  -2.9073720e+01   3.0000000e+02  -3.9383748e+00  -1.4418795e+00   5.7133260e-01
   2.0481786e+01  -2.9127678e+01   3.0000000e+02  -4.0349640e+00  -1.3603712e+00   5.8926880e-01
   2.0617009e+01  -2.9178162e+01   3.0000000e+02  -4.1173867e+00  -1.2686570e+00   6.0489245e-01
   2.0753950e+01  -2.9225125e+01   3.0000000e+02  -4.1854774e+00  -1.1657236e+00   6.1874894e-01
   2.0892486e+01  -2.9268524e+01   3.0000000e+02  -4.2389894e+00  -1.0506798e+00   6.3179911e-01
   2.1032494e+01  -2.9308319e+01   3.0000000e+02  -4.2775834e+00  -9.2280026e-01   6.4539831e-01
   2.1173847e+01  -2.9344474e+01   3.0000000e+02  -4.3008356e+00  -7.8157561e-01   6.6128823e-01
   2.1316416e+01  -2.9376955e+01   3.0000000e+02  -4.3082704e+00  -6.2676976e-01   6.8157345e-01
   2.1460072e+01  -2.9405732e+01   3.0000000e+02  -4.2994085e+00  -4.5849016e-01   7.0870236e-01
   2.1604683e+01  -2.9430779e+01   3.0000000e+02  -4.2738307e+00  -2.7727932e-01   7.4542377e-01
   2.1750119e+01  -2.9452072e+01   3.0000000e+02  -4.2312553e+00  -8.4204722e-02   7.9470045e-01
   2.1896245e+01  -2.9469592e+01   3.0000000e+02  -4.1716200e+00   1.1904109e-01   8.5959766e-01
   2.2042927e+01  -2.9483322e+01   3.0000000e+02  -4.0951676e+00   3.3008258e-01   9.4310393e-01
   2.2190030e+01  -2.9493249e+01   3.0000000e+02  -4.0025209e+00   5.4583639e-01   1.0479293e+00
   2.2337419e+01  -2.9499366e+01   3.0000000e+02  -3.8947403e+00   7.6255029e-01   1.1762785e+00
   2.2484958e+01  -2.9501665e+01   3.0000000e+02  -3.7733626e+00   9.7591783e-01   1.3296002e+00
   2.2632511e+01  -2.9500144e+01   3.0000000e+02  -3.6403936e+00   1.1812564e+00   1.5084036e+00
   2.2779941e+01  -2.9494806e+01   3.0000000e+02  -3.4982691e+00   1.3737458e+00   1.7121071e+00
   2.2927114e+01  -2.9485655e+01   3.0000000e+02  -3.3497738e+00   1.5487159e+00   1.9389677e+00
   2.3073893e+01  -2.9472699e+01   3.0000000e+02  -3.1979301e+00   1.7019228e+00   2.1861039e+00
   2.3220143e+01  -2.9455950e+01   3.0000000e+02  -3.0458548e+00   1.8298210e+00   2.4496212e+00
   2.3365730e+01  -2.9435425e+01   3.0000000e+02  -2.8966092e+00   1.9297776e+00   2.7248137e+00
   2.3510521e+01  -2.9411142e+01   3.0000000e+02  -2.7530595e+00   2.0002238e+00   3.0064246e+00
   2.3654382e+01  -2.9383123e+01   3.0000000e+02  -2.6177511e+00   2.0407133e+00   3.2889511e+00
   2.3797183e+01  -2.9351395e+01   3.0000000e+02  -2.4928082e+00   2.0518976e+00   3.5669663e+00
   2.3938794e+01  -2.9315986e+01   3.0000000e+02  -2.3798857e+00   2.0354250e+00   3.8353952e+00
   2.4079086e+01  -2.9276930e+01   3.0000000e+02  -2.2801443e+00   1.9937649e+00   4.0897605e+00
   2.4217933e+01  -2.9234263e+01   3.0000000e+02  -2.1942712e+00   1.9299976e+00   4.3263548e+00
   2.4355209e+01  -2.9188023e+01   3.0000000e+02  -2.1225292e+00   1.8475833e+00   4.5423284e+00
   2.4490792e+01  -2.9138253e+01   3.0000000e+02  -2.0648129e+00   1.7501288e+00   4.7357133e+00
   2.4624561e+01  -2.9085000e+01   3.0000000e+02  -2.0207263e+00   1.6411933e+00   4.9053634e+00
   2.4756397e+01  -2.9028311e+01   3.0000000e+02  -1.9896602e+00   1.5241364e+00   5.0508490e+00
   2.4886184e+01  -2.8968238e+01   3.0000000e+02  -1.9708504e+00   1.4020089e+00   5.1723236e+00
   2.5013808e+01  -2.8904837e+01   3.0000000e+02  -1.9634339e+00   1.2775039e+00   5.2703750e+00
   2.5139158e+01  -2.8838164e+01   3.0000000e+02  -1.9664977e+00   1.1529555e+00   5.3458863e+00
   2.5262125e+01  -2.8768281e+01   3.0000000e+02  -1.9791014e+00   1.0303646e+00   5.3999233e+00
   2.5382605e+01  -2.8695251e+01   3.0000000e+02  -2.0003067e+00   9.1145277e-01   5.4336491e+00
   2.5500495e+01  -2.8619139e+01   3.0000000e+02  -2.0291982e+00   7.9772811e-01   5.4482704e+00
   2.5615694e+01  -2.8540015e+01   3.0000000e+02  -2.0648952e+00   6.9053942e-01   5.4450197e+00
   2.5728107e+01  -2.8457949e+01   3.0000000e+02  -2.1065776e+00   5.9111860e-01   5.4251550e+00
   2.6355445e+01  -2.8089973e+01   3.0000000e+02  -2.1611062e+00   1.2029051e-02   5.1761862e+00
   2.6449408e+01  -2.7991713e+01   3.0000000e+02  -2.2277737e+00  -1.7673332e-02   5.0878304e+00
   2.6540080e+01  -2.7891132e+01   3.0000000e+02  -2.2984987e+00  -3.4549113e-02   4.9944330e+00
   2.6627397e+01  -2.7788315e+01   3.0000000e+02  -2.3739316e+00  -3.9028630e-02   4.8970984e+00
   2.6711295e+01  -2.7683346e+01   3.0000000e+02  -2.4548367e+00  -3.1915185e-02   4.7965251e+00
   2.6791717e+01  -2.7576312e+01   3.0000000e+02  -2.5419604e+00  -1.4362950e-02   4.6929124e+00
   2.6868606e+01  -2.7467302e+01   3.0000000e+02  -2.6358986e+00   1.2200202e-02   4.5859132e+00
   2.6941911e+01  -2.7356404e+01   3.0000000e+02  -2.7369510e+00   4.6161857e-02   4.4746408e+00
   2.7011584e+01  -2.7243711e+01   3.0000000e+02  -2.8449860e+00   8.5829066e-02   4.3577516e+00
   2.7077579e+01  -2.7129314e+01   3.0000000e+02  -2.9593589e+00   1.2954298e-01   4.2335725e+00
   2.7139855e+01  -2.7013306e+01   3.0000000e+02  -3.0788610e+00   1.7576617e-01   4.1002824e+00
   2.7198373e+01  -2.6895781e+01   3.0000000e+02  -3.2017404e+00   2.2315968e-01   3.9561107e+00
   2.7253098e+01  -2.6776834e+01   3.0000000e+02  -3.3257765e+00   2.7062782e-01   3.7995332e+00
   2.7303999e+01  -2.6656561e+01   3.0000000e+02  -3.4484070e+00   3.1733812e-01   3.6294421e+00
   2.7351048e+01  -2.6535059e+01   3.0000000e+02  -3.5668932e+00   3.6271801e-01   3.4452696e+00
   2.7394220e+01  -2.6412423e+01   3.0000000e+02  -3.6785057e+00   4.0643290e-01   3.2470514e+00
   2.7433492e+01  -2.6288753e+01   3.0000000e+02  -3.7807001e+00   4.4834359e-01   3.0354477e+00
   2.7468848e+01  -2.6164146e+01   3.0000000e+02  -3.8712899e+00   4.8845863e-01   2.8116862e+00
   2.7500273e+01  -2.6038700e+01   3.0000000e+02  -3.9485811e+00   5.2688224e-01   2.5774712e+00
   2.7527753e+01  -2.5912516e+01   3.0000000e+02  -4.0114680e+00   5.6375640e-01   2.3348581e+00
   2.7551281e+01  -2.5785691e+01   3.0000000e+02  -4.0594853e+00   5.9920290e-01   2.0860914e+00
   2.7570851e+01  -2.5658325e+01   3.0000000e+02  -4.0928112e+00   6.3327403e-01   1.8334518e+00
   2.7586461e+01  -2.5530518e+01   3.0000000e+02  -4.1122282e+00   6.6590853e-01   1.5790937e+00
   2.7598111e+01  -2.5402369e+01   3.0000000e+02  -4.1190432e+00   6.9690189e-01   1.3248940e+00
   2.7605805e+01  -2.5273977e+01   3.0000000e+02  -4.1149722e+00   7.2588532e-01   1.0723332e+00
   2.7609551e+01  -2.5145441e+01   3.0000000e+02  -4.1019994e+00   7.5231993e-01   8.2240185e-01
   2.7609357e+01  -2.5016861e+01   3.0000000e+02  -4.0822187e+00   7.7550519e-01   5.7553956e-01
   2.7605236e+01  -2.4888335e+01   3.0000000e+02  -4.0576611e+00   7.9459035e-01   3.3161827e-01
   2.7597204e+01  -2.4759962e+01   3.0000000e+02  -4.0301232e+00   8.0859672e-01   8.9974395e-02
   2.7585278e+01  -2.4631839e+01   3.0000000e+02  -4.0010051e+00   8.1644504e-01  -1.5052286e-01
   2.7569480e+01  -2.4504064e+01   3.0000000e+02  -3.9711707e+00   8.1698243e-01  -3.9133578e-01
   2.7549834e+01  -2.4376734e+01   3.0000000e+02  -3.9408461e+00   8.0901870e-01  -6.3409656e-01
   2.7526364e+01  -2.4249945e+01   3.0000000e+02  -3.9095700e+00   7.9136687e-01  -8.8040737e-01
   2.7499101e+01  -2.4123793e+01   3.0000000e+02  -3.8762110e+00   7.6288726e-01  -1.1316091e+00
   2.7468076e+01  -2.3998372e+01   3.0000000e+02  -3.8390548e+00   7.2254460e-01  -1.3885837e+00
   2.7433323e+01  -2.3873777e+01   3.0000000e+02  -3.7959619e+00   6.6946711e-01  -1.6515691e+00
   2.7394878e+01  -2.3750101e+01   3.0000000e+02  -3.7445780e+00   6.0300560e-01  -1.9200533e+00
   2.7352780e+01  -2.3627436e+01   3.0000000e+02  -3.6825761e+00   5.2278623e-01  -2.1927404e+00
   2.7307070e+01  -2.3505874e+01   3.0000000e+02  -3.6078936e+00   4.2874886e-01  -2.4676102e+00
   2.7257792e+01  -2.3385504e+01   3.0000000e+02  -3.5189333e+00   3.2115862e-01  -2.7420607e+00
   2.7204991e+01  -2.3266416e+01   3.0000000e+02  -3.4147008e+00   2.0059462e-01  -3.0131001e+00
   2.7148715e+01  -2.3148697e+01   3.0000000e+02  -3.2948623e+00   6.7902855e-02  -3.2775682e+00
   2.7089014e+01  -2.3032435e+01   3.0000000e+02  -3.1597254e+00  -7.5867565e-02  -3.5323343e+00
   2.7025940e+01  -2.2917715e+01   3.0000000e+02  -3.0101544e+00  -2.2955117e-01  -3.7744605e+00
   2.6959549e+01  -2.2804620e+01   3.0000000e+02  -2.8474503e+00  -3.9194927e-01  -4.0012924e+00
   2.6889895e+01  -2.2693235e+01   3.0000000e+02  -2.6732161e+00  -5.6190015e-01  -4.2104861e+00
   2.6817037e+01  -2.2583640e+01   3.0000000e+02  -2.4892418e+00  -7.3833669e-01  -4.3999870e+00
   2.6741035e+01  -2.2475915e+01   3.0000000e+02  -2.2974163e+00  -9.2030281e-01  -4.5679674e+00
   2.6661951e+01  -2.2370139e+01   3.0000000e+02  -2.0996769e+00  -1.1069441e+00  -4.7127627e+00
   2.6579849e+01  -2.2266389e+01   3.0000000e+02  -1.8979888e+00  -1.2974713e+00  -4.8328224e+00
   2.6494794e+01  -2.2164739e+01   3.0000000e+02  -1.6943468e+00  -1.4911041e+00  -4.9266926e+00
   2.6406854e+01  -2.2065263e+01   3.0000000e+02  -1.4907935e+00  -1.6869996e+00  -4.9930305e+00
   2.6316096e+01  -2.1968034e+01   3.0000000e+02  -1.2894264e+00  -1.8841939e+00  -5.0306593e+00
   2.6222593e+01  -2.1873121e+01   3.0000000e+02  -1.0924047e+00  -2.0815496e+00  -5.0386521e+00
   2.6126416e+01  -2.1780593e+01   3.0000000e+02  -9.0193323e-01  -2.2777315e+00  -5.0164228e+00
   2.6027637e+01  -2.1690516e+01   3.0000000e+02  -7.2023686e-01  -2.4712075e+00  -4.9638248e+00
   2.5926334e+01  -2.1602955e+01   3.0000000e+02  -5.4952704e-01  -2.6602694e+00  -4.8812446e+00
   2.5822581e+01  -2.1517973e+01   3.0000000e+02  -3.9194101e-01  -2.8431012e+00  -4.7696652e+00
   2.5716457e+01  -2.1435631e+01   3.0000000e+02  -2.4949102e-01  -3.0178501e+00  -4.6307211e+00
   2.5608040e+01  -2.1355988e+01   3.0000000e+02  -1.2399439e-01  -3.1827348e+00  -4.4667089e+00
   2.5497412e+01  -2.1279101e+01   3.0000000e+02  -1.7008344e-02  -3.3361561e+00  -4.2805761e+00
   2.5384653e+01  -2.1205024e+01   3.0000000e+02   7.0243343e-02  -3.4768270e+00  -4.0758540e+00
   2.5269847e+01  -2.1133811e+01   3.0000000e+02   1.3693128e-01  -3.6038872e+00  -3.8565665e+00
   2.5153077e+01  -2.1065512e+01   3.0000000e+02   1.8268138e-01  -3.7170190e+00  -3.6270736e+00
   2.5034429e+01  -2.1000176e+01   3.0000000e+02   2.0761218e-01  -3.8165255e+00  -3.3918894e+00
   2.4913988e+01  -2.0937849e+01   3.0000000e+02   2.1235296e-01  -3.9033789e+00  -3.1554498e+00
   2.4791842e+01  -2.0878576e+01   3.0000000e+02   1.9803002e-01  -3.9792124e+00  -2.9218755e+00
   2.4668078e+01  -2.0822399e+01   3.0000000e+02   1.6622149e-01  -4.0462629e+00  -2.6947199e+00
   2.4542785e+01  -2.0769358e+01   3.0000000e+02   1.1888032e-01  -4.1072524e+00  -2.4767536e+00
   2.4416053e+01  -2.0719489e+01   3.0000000e+02   5.8230847e-02  -4.1652253e+00  -2.2697870e+00
   2.4287972e+01  -2.0672830e+01   3.0000000e+02  -1.3348982e-02  -4.2233532e+00  -2.0745590e+00
   2.4158634e+01  -2.0629412e+01   3.0000000e+02  -9.3453723e-02  -4.2847180e+00  -1.8907015e+00
   2.4028130e+01  -2.0589266e+01   3.0000000e+02  -1.7976557e-01  -4.3521078e+00  -1.7167764e+00
   2.3896552e+01  -2.0552422e+01   3.0000000e+02  -2.7015142e-01  -4.4278299e+00  -1.5503868e+00
   2.3763993e+01  -2.0518904e+01   3.0000000e+02  -3.6273755e-01  -4.5135567e+00  -1.3883418e+00
   2.3630548e+01  -2.0488737e+01   3.0000000e+02  -4.5594824e-01  -4.6102218e+00  -1.2268600e+00
   2.3496310e+01  -2.0461942e+01   3.0000000e+02  -5.4852448e-01  -4.7179596e+00  -1.0617879e+00
   2.3361374e+01  -2.0438538e+01   3.0000000e+02  -6.3950879e-01  -4.8360859e+00  -8.8883267e-01
   2.3225834e+01  -2.0418541e+01   3.0000000e+02  -7.2821498e-01  -4.9631236e+00  -7.0377795e-01
   2.3089785e+01  -2.0401965e+01   3.0000000e+02  -8.1417934e-01  -5.0968585e+00  -5.0268761e-01
   2.2953324e+01  -2.0388823e+01   3.0000000e+02  -8.9710389e-01  -5.2344241e+00  -2.8208447e-01
   2.2816545e+01  -2.0379124e+01   3.0000000e+02  -9.7680163e-01  -5.3724133e+00  -3.9093778e-02
   2.2679544e+01  -2.0372873e+01   3.0000000e+02  -1.0531362e+00  -5.5069978e+00   2.2842895e-01
   2.2542418e+01  -2.0370077e+01   3.0000000e+02  -1.1259688e+00  -5.6340701e+00   5.2181672e-01
   2.2405262e+01  -2.0370736e+01   3.0000000e+02  -1.1951216e+00  -5.7493850e+00   8.4153103e-01
   2.2268172e+01  -2.0374850e+01   3.0000000e+02  -1.2603444e+00  -5.8487096e+00   1.1871342e+00
   2.2131245e+01  -2.0382417e+01   3.0000000e+02  -1.3212990e+00  -5.9279728e+00   1.5572860e+00
   2.1994576e+01  -2.0393431e+01   3.0000000e+02  -1.3775602e+00  -5.9834179e+00   1.9497747e+00
   2.1858260e+01  -2.0407884e+01   3.0000000e+02  -1.4286238e+00  -6.0117533e+00   2.3615696e+00
   2.1722394e+01  -2.0425766e+01   3.0000000e+02  -1.4739242e+00  -6.0103004e+00   2.7889012e+00
   2.1587073e+01  -2.0447065e+01   3.0000000e+02  -1.5128596e+00  -5.9771336e+00   3.2273934e+00
   2.1452392e+01  -2.0471765e+01   3.0000000e+02  -1.5448137e+00  -5.9111978e+00   3.6722141e+00
   2.1318446e+01  -2.0499849e+01   3.0000000e+02  -1.5691709e+00  -5.8123974e+00   4.1182728e+00
   2.1185328e+01  -2.0531297e+01   3.0000000e+02  -1.5853254e+00  -5.6816324e+00   4.5604455e+00
   2.1053132e+01  -2.0566086e+01   3.0000000e+02  -1.5926766e+00  -5.5207807e+00   4.9938003e+00
   2.0921953e+01  -2.0604193e+01   3.0000000e+02  -1.5906140e+00  -5.3326115e+00   5.4138293e+00
   2.0791883e+01  -2.0645591e+01   3.0000000e+02  -1.5785013e+00  -5.1206210e+00   5.8166495e+00
   2.0663013e+01  -2.0690249e+01   3.0000000e+02  -1.5556570e+00  -4.8888209e+00   6.1991377e+00
   2.0535436e+01  -2.0738137e+01   3.0000000e+02  -1.5213384e+00  -4.6414926e+00   6.5589999e+00
   2.0409243e+01  -2.0789220e+01   3.0000000e+02  -1.4747529e+00  -4.3829168e+00   6.8947619e+00
   2.0284523e+01  -2.0843462e+01   3.0000000e+02  -1.4150801e+00  -4.1171297e+00   7.2056882e+00
   2.0161365e+01  -2.0900825e+01   3.0000000e+02  -1.3415219e+00  -3.8477298e+00   7.4916311e+00
   2.0039859e+01  -2.0961268e+01   3.0000000e+02  -1.2533736e+00  -3.5777487e+00   7.7528490e+00
   1.9920092e+01  -2.1024748e+01   3.0000000e+02  -1.1501035e+00  -3.3095860e+00   7.9898298e+00
   1.9802151e+01  -2.1091220e+01   3.0000000e+02  -1.0314345e+00  -3.0450302e+00   8.2031234e+00
   1.9686120e+01  -2.1160637e+01   3.0000000e+02  -8.9741138e-01  -2.7853245e+00   8.3932237e+00
   1.9572085e+01  -2.1232948e+01   3.0000000e+02  -7.4845056e-01  -2.5312880e+00   8.5604911e+00
   1.9460129e+01  -2.1308104e+01   3.0000000e+02  -5.8534200e-01  -2.2834293e+00   8.7051447e+00
   1.9350335e+01  -2.1386049e+01   3.0000000e+02  -4.0924923e-01  -2.0420736e+00   8.8272709e+00
   1.9242784e+01  -2.1466728e+01   3.0000000e+02  -2.2164688e-01  -1.8074592e+00   8.9268797e+00
   1.9137555e+01  -2.1550084e+01   3.0000000e+02  -2.4259121e-02  -1.5798108e+00   9.0039581e+00
   1.9034727e+01  -2.1636057e+01   3.0000000e+02   1.8101572e-01  -1.3593888e+00   9.0585229e+00
   1.8934378e+01  -2.1724585e+01   3.0000000e+02   3.9218586e-01  -1.1465057e+00   9.0906631e+00
   1.8836583e+01  -2.1815605e+01   3.0000000e+02   6.0723896e-01  -9.4152166e-01   9.1005647e+00
   1.8741417e+01  -2.1909051e+01   3.0000000e+02   8.2419314e-01  -7.4483856e-01   9.0885166e+00
   1.8648953e+01  -2.2004856e+01   3.0000000e+02   1.0411404e+00  -5.5687898e-01   9.0549041e+00
   1.8559262e+01  -2.2102951e+01   3.0000000e+02   1.2562654e+00  -3.7807047e-01   9.0001944e+00
   1.8472415e+01  -2.2203264e+01   3.0000000e+02   1.4678495e+00  -2.0883868e-01   8.9249203e+00
   1.8388478e+01  -2.2305724e+01   3.0000000e+02   1.6742738e+00  -4.9593421e-02   8.8296640e+00
   1.8307520e+01  -2.2410257e+01   3.0000000e+02   1.8740003e+00   9.9253200e-02   8.7150555e+00
   1.8229604e+01  -2.2516785e+01   3.0000000e+02   2.0655584e+00   2.3729826e-01   8.5817789e+00
   1.8154795e+01  -2.2625233e+01   3.0000000e+02   2.2475540e+00   3.6412371e-01   8.4305842e+00
   1.8083152e+01  -2.2735520e+01   3.0000000e+02   2.4186539e+00   4.7930868e-01   8.2623185e+00
   1.8014736e+01  -2.2847567e+01   3.0000000e+02   2.5776183e+00   5.8241367e-01   8.0779475e+00
   1.7949604e+01  -2.2961291e+01   3.0000000e+02   2.7233161e+00   6.7300438e-01   7.8785837e+00
   1.7887810e+01  -2.3076610e+01   3.0000000e+02   2.8547679e+00   7.5066827e-01   7.6654913e+00
   1.7829410e+01  -2.3193438e+01   3.0000000e+02   2.9711785e+00   8.1503455e-01   7.4400894e+00
   1.7774454e+01  -2.3311689e+01   3.0000000e+02   3.0719718e+00   8.6582290e-01   7.2039161e+00
   1.7722991e+01  -2.3431277e+01   3.0000000e+02   3.1568082e+00   9.0286714e-01   6.9585844e+00
   1.7675069e+01  -2.3552112e+01   3.0000000e+02   3.2255774e+00   9.2614771e-01   6.7057314e+00
   1.7630732e+01  -2.3674106e+01   3.0000000e+02   3.2783733e+00   9.3581558e-01   6.4469445e+00
   1.7590022e+01  -2.3797168e+01   3.0000000e+02   3.3154374e+00   9.3220028e-01   6.1837198e+00
   1.7552981e+01  -2.3921205e+01   3.0000000e+02   3.3370942e+00   9.1580059e-01   5.9174290e+00
   1.7519646e+01  -2.4046126e+01   3.0000000e+02   3.3436750e+00   8.8727547e-01   5.6493051e+00
   1.7490053e+01  -2.4171837e+01   3.0000000e+02   3.3354530e+00   8.4741244e-01   5.3804795e+00
   1.7464233e+01  -2.4298243e+01   3.0000000e+02   3.3125998e+00   7.9710258e-01   5.1120271e+00
   1.7442219e+01  -2.4425250e+01   3.0000000e+02   3.2751790e+00   7.3728960e-01   4.8450284e+00
   1.7424038e+01  -2.4552761e+01   3.0000000e+02   3.2231652e+00   6.6896015e-01   4.5806395e+00
   1.7409714e+01  -2.4680680e+01   3.0000000e+02   3.1565039e+00   5.9310813e-01   4.3201330e+00
   1.7399272e+01  -2.4808910e+01   3.0000000e+02   3.0751940e+00   5.1070851e-01   4.0649218e+00
   1.7392729e+01  -2.4937353e+01   3.0000000e+02   2.9793703e+00   4.2272407e-01   3.8165423e+00
   1.7390105e+01  -2.5065911e+01   3.0000000e+02   2.8693910e+00   3.3007125e-01   3.5766025e+00
   1.7391413e+01  -2.5194486e+01   3.0000000e+02   2.7458906e+00   2.3363520e-01   3.3467017e+00
   1.7396664e+01  -2.5322979e+01   3.0000000e+02   2.6098131e+00   1.3425206e-01   3.1283373e+00
   1.7405867e+01  -2.5451290e+01   3.0000000e+02   2.4624086e+00   3.2699932e-02   2.9228048e+00
   1.7419027e+01  -2.5579320e+01   3.0000000e+02   2.3051933e+00  -7.0308557e-02   2.7311056e+00
   1.7436148e+01  -2.5706971e+01   3.0000000e+02   2.1398902e+00  -1.7414284e-01   2.5538769e+00
   1.7457228e+01  -2.5834142e+01   3.0000000e+02   1.9683534e+00  -2.7824928e-01   2.3913524e+00
   1.7482265e+01  -2.5960734e+01   3.0000000e+02   1.7924760e+00  -3.8216863e-01   2.2433351e+00
   1.7511251e+01  -2.6086648e+01   3.0000000e+02   1.6140983e+00  -4.8551502e-01   2.1092093e+00
   1.7544176e+01  -2.6211786e+01   3.0000000e+02   1.4349181e+00  -5.8796741e-01   1.9879705e+00
   1.7581028e+01  -2.6336047e+01   3.0000000e+02   1.2564112e+00  -6.8924115e-01   1.8782822e+00
   1.7621791e+01  -2.6459334e+01   3.0000000e+02   1.0797437e+00  -7.8905092e-01   1.7785470e+00
   1.7666444e+01  -2.6581549e+01   3.0000000e+02   9.0571778e-01  -8.8707006e-01   1.6870056e+00
   1.7714966e+01  -2.6702594e+01   3.0000000e+02   7.3472744e-01  -9.8290673e-01   1.6018418e+00
   1.7767330e+01  -2.6822373e+01   3.0000000e+02   5.6673673e-01  -1.0760668e+00   1.5213027e+00
[truncated: 3,642,157 more chars]
