# Supplementary material for: A high-resolution lithospheric magnetic field model over southern Africa based on a joint inversion of CHAMP, Swarm, WDMAM, and ground magnetic field data
Source: Copernicus journal article supplement (doi:10.5194/se-9-897-2018), 2018-07-16
Supplement: Supplementary file 1 [file se-9-897-2018-supplement.zip › SupplementaryMaterial/ModelSA350km.txt]

   2.2500005e+01  -2.4999991e+01   3.5000000e+02   1.1528521e+00  -2.1703548e+00  -4.4574732e+00
   2.2566483e+01  -2.5124977e+01   3.5000000e+02   8.4560083e-01  -1.8911150e+00  -4.6425462e+00
   2.2649272e+01  -2.5030796e+01   3.5000000e+02   8.9145766e-01  -1.9220761e+00  -4.5843767e+00
   2.2619593e+01  -2.4913455e+01   3.5000000e+02   1.1272843e+00  -2.1444130e+00  -4.4261867e+00
   2.2500000e+01  -2.4861269e+01   3.5000000e+02   1.3765591e+00  -2.3786714e+00  -4.2616195e+00
   2.2380407e+01  -2.4913455e+01   3.5000000e+02   1.4566788e+00  -2.4490796e+00  -4.2355167e+00
   2.2350728e+01  -2.5030796e+01   3.5000000e+02   1.3033580e+00  -2.3152467e+00  -4.3830168e+00
   2.2433517e+01  -2.5124977e+01   3.5000000e+02   1.0289907e+00  -2.0709070e+00  -4.5657681e+00
   2.2791110e+01  -2.5050403e+01   3.5000000e+02   6.5359970e-01  -1.6907214e+00  -4.6604237e+00
   2.2783469e+01  -2.4922052e+01   3.5000000e+02   8.7777017e-01  -1.9063006e+00  -4.5282325e+00
   2.2711005e+01  -2.4811602e+01   3.5000000e+02   1.1559375e+00  -2.1804317e+00  -4.3502300e+00
   2.2590406e+01  -2.4744279e+01   3.5000000e+02   1.4265727e+00  -2.4412778e+00  -4.1571240e+00
   2.2449214e+01  -2.4735429e+01   3.5000000e+02   1.6327084e+00  -2.6264495e+00  -4.0072011e+00
   2.2319588e+01  -2.4787069e+01   3.5000000e+02   1.7298976e+00  -2.7008991e+00  -3.9599868e+00
   2.2231095e+01  -2.4887431e+01   3.5000000e+02   1.6925099e+00  -2.6591199e+00  -4.0401315e+00
   2.2204049e+01  -2.5013608e+01   3.5000000e+02   1.5230205e+00  -2.5152660e+00  -4.2204282e+00
   2.2244821e+01  -2.5136726e+01   3.5000000e+02   1.2581169e+00  -2.2950745e+00  -4.4367406e+00
   2.2344231e+01  -2.5228534e+01   3.5000000e+02   9.6197888e-01  -2.0371473e+00  -4.6219523e+00
   2.2479512e+01  -2.5267912e+01   3.5000000e+02   7.0731053e-01  -1.7955126e+00  -4.7352696e+00
   2.2619515e+01  -2.5245788e+01   3.5000000e+02   5.5418861e-01  -1.6309242e+00  -4.7704882e+00
   2.2731985e+01  -2.5167260e+01   3.5000000e+02   5.3589234e-01  -1.5908806e+00  -4.7415954e+00
   2.2627648e+01  -2.4622121e+01   3.5000000e+02   1.5436283e+00  -2.5796507e+00  -3.9883554e+00
   2.2485785e+01  -2.4604968e+01   3.5000000e+02   1.7596537e+00  -2.7739764e+00  -3.8084684e+00
   2.2345448e+01  -2.4630489e+01   3.5000000e+02   1.9115067e+00  -2.8925514e+00  -3.6918299e+00
   2.2221716e+01  -2.4695945e+01   3.5000000e+02   1.9825092e+00  -2.9308818e+00  -3.6670561e+00
   2.2127926e+01  -2.4794296e+01   3.5000000e+02   1.9610120e+00  -2.8935230e+00  -3.7429644e+00
   2.2074261e+01  -2.4914949e+01   3.5000000e+02   1.8440500e+00  -2.7890638e+00  -3.9055009e+00
   2.2066638e+01  -2.5044874e+01   3.5000000e+02   1.6408382e+00  -2.6266471e+00  -4.1224863e+00
   2.2106024e+01  -2.5169999e+01   3.5000000e+02   1.3735076e+00  -2.4160336e+00  -4.3535310e+00
   2.2188274e+01  -2.5276731e+01   3.5000000e+02   1.0741773e+00  -2.1706524e+00  -4.5608904e+00
   2.2304526e+01  -2.5353443e+01   3.5000000e+02   7.7941935e-01  -1.9108897e+00  -4.7180133e+00
   2.2442139e+01  -2.5391760e+01   3.5000000e+02   5.2413214e-01  -1.6645453e+00  -4.8139443e+00
   2.2586081e+01  -2.5387492e+01   3.5000000e+02   3.3666049e-01  -1.4631807e+00  -4.8525912e+00
   2.2720608e+01  -2.5341106e+01   3.5000000e+02   2.3604374e-01  -1.3357139e+00  -4.8470637e+00
   2.2831035e+01  -2.5257672e+01   3.5000000e+02   2.3114725e-01  -1.3021228e+00  -4.8111949e+00
   2.2905370e+01  -2.5146297e+01   3.5000000e+02   3.2072986e-01  -1.3694784e+00  -4.7519797e+00
   2.2935626e+01  -2.5019107e+01   3.5000000e+02   4.9373386e-01  -1.5307238e+00  -4.6667396e+00
   2.2918657e+01  -2.4889911e+01   3.5000000e+02   7.3009557e-01  -1.7655436e+00  -4.5469025e+00
   2.2856438e+01  -2.4772694e+01   3.5000000e+02   1.0031107e+00  -2.0430353e+00  -4.3868379e+00
   2.2755800e+01  -2.4680108e+01   3.5000000e+02   1.2835038e+00  -2.3264321e+00  -4.1930429e+00
   2.2005477e+01  -2.4730152e+01   3.5000000e+02   2.1961576e+00  -3.0902986e+00  -3.4423891e+00
   2.1948449e+01  -2.4845263e+01   3.5000000e+02   2.0981082e+00  -2.9982867e+00  -3.6037048e+00
   2.1923356e+01  -2.4969413e+01   3.5000000e+02   1.9342485e+00  -2.8685193e+00  -3.8131098e+00
   2.1931748e+01  -2.5095402e+01   3.5000000e+02   1.7133260e+00  -2.7040186e+00  -4.0467984e+00
   2.1973238e+01  -2.5215904e+01   3.5000000e+02   1.4494797e+00  -2.5076387e+00  -4.2803544e+00
   2.2045499e+01  -2.5323890e+01   3.5000000e+02   1.1607777e+00  -2.2839063e+00  -4.4921201e+00
   2.2144380e+01  -2.5413044e+01   3.5000000e+02   8.6718813e-01  -2.0407376e+00  -4.6657845e+00
   2.2264136e+01  -2.5478137e+01   3.5000000e+02   5.8846491e-01  -1.7902914e+00  -4.7920515e+00
   2.2397759e+01  -2.5515346e+01   3.5000000e+02   3.4233009e-01  -1.5484952e+00  -4.8692106e+00
   2.2537398e+01  -2.5522483e+01   3.5000000e+02   1.4323408e-01  -1.3333062e+00  -4.9023881e+00
   2.2674836e+01  -2.5499126e+01   3.5000000e+02   1.7678426e-03  -1.1622421e+00  -4.9014618e+00
   2.2801990e+01  -2.5446650e+01   3.5000000e+02  -7.5396331e-02  -1.0499442e+00  -4.8779876e+00
   2.2911403e+01  -2.5368141e+01   3.5000000e+02  -8.5263126e-02  -1.0064220e+00  -4.8418190e+00
   2.2996693e+01  -2.5268206e+01   3.5000000e+02  -2.8278584e-02  -1.0361990e+00  -4.7982855e+00
   2.3052932e+01  -2.5152698e+01   3.5000000e+02   9.1685158e-02  -1.1381675e+00  -4.7467381e+00
   2.3076921e+01  -2.5028363e+01   3.5000000e+02   2.6720348e-01  -1.3058328e+00  -4.6810075e+00
   2.3067361e+01  -2.4902443e+01   3.5000000e+02   4.8731685e-01  -1.5276832e+00  -4.5918280e+00
   2.3024906e+01  -2.4782247e+01   3.5000000e+02   7.3814863e-01  -1.7877962e+00  -4.4706419e+00
   2.2952106e+01  -2.4674736e+01   3.5000000e+02   1.0042377e+00  -2.0669104e+00  -4.3136609e+00
   2.2853234e+01  -2.4586117e+01   3.5000000e+02   1.2703141e+00  -2.3442142e+00  -4.1248560e+00
   2.2734035e+01  -2.4521494e+01   3.5000000e+02   1.5227426e+00  -2.5996303e+00  -3.9169438e+00
   2.2601387e+01  -2.4484584e+01   3.5000000e+02   1.7500923e+00  -2.8161933e+00  -3.7100696e+00
   2.2462919e+01  -2.4477508e+01   3.5000000e+02   1.9427005e+00  -2.9819250e+00  -3.5285587e+00
   2.2326579e+01  -2.4500672e+01   3.5000000e+02   2.0917636e+00  -3.0907652e+00  -3.3964782e+00
   2.2200199e+01  -2.4552745e+01   3.5000000e+02   2.1887176e+00  -3.1422753e+00  -3.3329820e+00
   2.2091059e+01  -2.4630734e+01   3.5000000e+02   2.2255570e+00  -3.1401964e+00  -3.3484475e+00
   2.1844868e+01  -2.5273528e+01   3.5000000e+02   1.4887424e+00  -2.5761464e+00  -4.2168013e+00
   2.1916247e+01  -2.5384116e+01   3.5000000e+02   1.1956850e+00  -2.3606687e+00  -4.4368961e+00
   2.2010268e+01  -2.5479941e+01   3.5000000e+02   8.9643608e-01  -2.1247327e+00  -4.6217618e+00
   2.2123330e+01  -2.5557281e+01   3.5000000e+02   6.0501931e-01  -1.8751674e+00  -4.7638165e+00
   2.2251066e+01  -2.5613127e+01   3.5000000e+02   3.3434046e-01  -1.6218544e+00  -4.8602785e+00
   2.2388512e+01  -2.5645302e+01   3.5000000e+02   9.5476024e-02  -1.3770353e+00  -4.9131591e+00
   2.2530311e+01  -2.5652548e+01   3.5000000e+02  -1.0273578e-01  -1.1540555e+00  -4.9286516e+00
   2.2670926e+01  -2.5634584e+01   3.5000000e+02  -2.5380112e-01  -9.6586851e-01  -4.9158944e+00
   2.2804870e+01  -2.5592111e+01   3.5000000e+02  -3.5342364e-01  -8.2366301e-01  -4.8852540e+00
   2.2926927e+01  -2.5526786e+01   3.5000000e+02  -3.9924238e-01  -7.3588435e-01  -4.8463951e+00
   2.3032366e+01  -2.5441153e+01   3.5000000e+02  -3.9057315e-01  -7.0776108e-01  -4.8064627e+00
   2.3117126e+01  -2.5338544e+01   3.5000000e+02  -3.2827810e-01  -7.4126599e-01  -4.7687041e+00
   2.3177977e+01  -2.5222939e+01   3.5000000e+02  -2.1482907e-01  -8.3531729e-01  -4.7318082e+00
   2.3212635e+01  -2.5098809e+01   3.5000000e+02  -5.4544947e-02  -9.8600551e-01  -4.6901625e+00
   2.3219844e+01  -2.4970944e+01   3.5000000e+02   1.4615166e-01  -1.1867109e+00  -4.6350759e+00
   2.3199412e+01  -2.4844261e+01   3.5000000e+02   3.7874719e-01  -1.4281838e+00  -4.5568134e+00
   2.3152206e+01  -2.4723616e+01   3.5000000e+02   6.3308068e-01  -1.6987188e+00  -4.4470530e+00
   2.3080104e+01  -2.4613620e+01   3.5000000e+02   8.9823912e-01  -1.9846312e+00  -4.3012267e+00
   2.2985914e+01  -2.4518468e+01   3.5000000e+02   1.1636604e+00  -2.2711187e+00  -4.1202175e+00
   2.2873265e+01  -2.4441779e+01   3.5000000e+02   1.4200843e+00  -2.5434551e+00  -3.9110453e+00
   2.2746461e+01  -2.4386462e+01   3.5000000e+02   1.6600233e+00  -2.7883157e+00  -3.6864470e+00
   2.2610323e+01  -2.4354616e+01   3.5000000e+02   1.8775844e+00  -2.9949630e+00  -3.4635145e+00
   2.2470010e+01  -2.4347446e+01   3.5000000e+02   2.0678065e+00  -3.1561361e+00  -3.2616160e+00
   2.2330831e+01  -2.4365223e+01   3.5000000e+02   2.2258093e+00  -3.2684497e+00  -3.0999452e+00
   2.2198056e+01  -2.4407274e+01   3.5000000e+02   2.3461747e+00  -3.3322339e+00  -2.9949702e+00
   2.2076722e+01  -2.4472006e+01   3.5000000e+02   2.4228862e+00  -3.3507977e+00  -2.9581147e+00
   2.1971451e+01  -2.4556965e+01   3.5000000e+02   2.4499037e+00  -3.3292144e+00  -2.9940974e+00
   2.1886278e+01  -2.4658924e+01   3.5000000e+02   2.4222327e+00  -3.2729111e+00  -3.1002900e+00
   2.1824496e+01  -2.4774000e+01   3.5000000e+02   2.3371454e+00  -3.1864313e+00  -3.2672706e+00
   2.1788530e+01  -2.4897801e+01   3.5000000e+02   2.1951723e+00  -3.0726961e+00  -3.4804111e+00
   2.1779836e+01  -2.5025590e+01   3.5000000e+02   2.0006091e+00  -2.9329527e+00  -3.7219984e+00
   2.1798831e+01  -2.5152461e+01   3.5000000e+02   1.7614433e+00  -2.7673793e+00  -3.9733763e+00
   2.2206112e+01  -2.5734817e+01   3.5000000e+02   1.4071615e-01  -1.5220923e+00  -4.8829314e+00
   2.2344390e+01  -2.5768576e+01   3.5000000e+02  -9.8168230e-02  -1.2717369e+00  -4.9227137e+00
   2.2486994e+01  -2.5781239e+01   3.5000000e+02  -3.0264469e-01  -1.0372409e+00  -4.9281595e+00
   2.2629959e+01  -2.5772455e+01   3.5000000e+02  -4.6820808e-01  -8.2894483e-01  -4.9070977e+00
   2.2769312e+01  -2.5742469e+01   3.5000000e+02  -5.9177549e-01  -6.5612026e-01  -4.8686058e+00
   2.2901183e+01  -2.5692114e+01   3.5000000e+02  -6.7146564e-01  -5.2628987e-01  -4.8218392e+00
   2.3021922e+01  -2.5622788e+01   3.5000000e+02  -7.0637526e-01  -4.4484463e-01  -4.7748316e+00
   2.3128207e+01  -2.5536414e+01   3.5000000e+02  -6.9639135e-01  -4.1497434e-01  -4.7334165e+00
   2.3217130e+01  -2.5435380e+01   3.5000000e+02  -6.4207961e-01  -4.3784424e-01  -4.7004160e+00
   2.3286284e+01  -2.5322476e+01   3.5000000e+02  -5.4475964e-01  -5.1282358e-01  -4.6751861e+00
   2.3333824e+01  -2.5200810e+01   3.5000000e+02  -4.0670019e-01  -6.3770665e-01  -4.6536336e+00
   2.3358512e+01  -2.5073722e+01   3.5000000e+02  -2.3140929e-01  -8.0880204e-01  -4.6287495e+00
   2.3359744e+01  -2.4944688e+01   3.5000000e+02  -2.3860962e-02  -1.0209015e+00  -4.5916450e+00
   2.3337560e+01  -2.4817228e+01   3.5000000e+02   2.0947713e-01  -1.2671806e+00  -4.5329772e+00
   2.3292633e+01  -2.4694808e+01   3.5000000e+02   4.6094410e-01  -1.5391824e+00  -4.4445536e+00
   2.3226246e+01  -2.4580748e+01   3.5000000e+02   7.2227612e-01  -1.8269820e+00  -4.3208428e+00
   2.3140249e+01  -2.4478131e+01   3.5000000e+02   9.8538176e-01  -2.1196203e+00  -4.1601291e+00
   2.3037005e+01  -2.4389725e+01   3.5000000e+02   1.2430708e+00  -2.4057573e+00  -3.9651330e+00
   2.2919326e+01  -2.4317909e+01   3.5000000e+02   1.4895460e+00  -2.6744626e+00  -3.7430224e+00
   2.2790392e+01  -2.4264612e+01   3.5000000e+02   1.7205223e+00  -2.9160193e+00  -3.5048683e+00
   2.2653675e+01  -2.4231265e+01   3.5000000e+02   1.9329264e+00  -3.1226031e+00  -3.2646895e+00
   2.2512842e+01  -2.4218760e+01   3.5000000e+02   2.1243213e+00  -3.2888110e+00  -3.0381881e+00
   2.2371665e+01  -2.4227433e+01   3.5000000e+02   2.2921947e+00  -3.4119311e+00  -2.8413480e+00
   2.2233924e+01  -2.4257052e+01   3.5000000e+02   2.4333769e+00  -3.4919574e+00  -2.6889230e+00
   2.2103315e+01  -2.4306822e+01   3.5000000e+02   2.5437562e+00  -3.5312812e+00  -2.5929502e+00
   2.1983349e+01  -2.4375409e+01   3.5000000e+02   2.6184142e+00  -3.5340670e+00  -2.5614308e+00
   2.1877268e+01  -2.4460971e+01   3.5000000e+02   2.6521457e+00  -3.5053755e+00  -2.5974107e+00
   2.1787954e+01  -2.4561206e+01   3.5000000e+02   2.6402572e+00  -3.4502007e+00  -2.6986565e+00
   2.1717858e+01  -2.4673412e+01   3.5000000e+02   2.5794237e+00  -3.3726144e+00  -2.8580570e+00
   2.1668928e+01  -2.4794557e+01   3.5000000e+02   2.4684303e+00  -3.2752171e+00  -3.0646136e+00
   2.1642551e+01  -2.4921357e+01   3.5000000e+02   2.3086384e+00  -3.1589859e+00  -3.3047882e+00
   2.1639516e+01  -2.5050367e+01   3.5000000e+02   2.1040937e+00  -3.0235049e+00  -3.5639190e+00
   2.1659977e+01  -2.5178069e+01   3.5000000e+02   1.8613327e+00  -2.8675349e+00  -3.8274010e+00
   2.1703447e+01  -2.5300971e+01   3.5000000e+02   1.5889056e+00  -2.6897752e+00  -4.0816264e+00
   2.1768802e+01  -2.5415702e+01   3.5000000e+02   1.2967537e+00  -2.4897202e+00  -4.3146615e+00
   2.1854304e+01  -2.5519106e+01   3.5000000e+02   9.9552114e-01  -2.2684566e+00  -4.5167868e+00
   2.1957642e+01  -2.5608328e+01   3.5000000e+02   6.9588744e-01  -2.0292578e+00  -4.6809621e+00
   2.2075997e+01  -2.5680903e+01   3.5000000e+02   4.0794073e-01  -1.7778152e+00  -4.8032285e+00
   2.2817160e+01  -2.5862456e+01   3.5000000e+02  -8.8067722e-01  -4.1031570e-01  -4.7906699e+00
   2.2950195e+01  -2.5812714e+01   3.5000000e+02  -9.5863444e-01  -2.7581406e-01  -4.7316698e+00
   2.3073880e+01  -2.5746332e+01   3.5000000e+02  -9.9899309e-01  -1.8360922e-01  -4.6758546e+00
   2.3185665e+01  -2.5664687e+01   3.5000000e+02  -1.0017551e+00  -1.3613590e-01  -4.6288478e+00
   2.3283263e+01  -2.5569471e+01   3.5000000e+02  -9.6721153e-01  -1.3440184e-01  -4.5940693e+00
   2.3364693e+01  -2.5462651e+01   3.5000000e+02  -8.9592202e-01  -1.7824419e-01  -4.5723505e+00
   2.3428322e+01  -2.5346430e+01   3.5000000e+02  -7.8883181e-01  -2.6654500e-01  -4.5617708e+00
   2.3472896e+01  -2.5223196e+01   3.5000000e+02  -6.4748184e-01  -3.9737486e-01  -4.5577752e+00
   2.3497562e+01  -2.5095476e+01   3.5000000e+02  -4.7428710e-01  -5.6800347e-01  -4.5535914e+00
   2.3501877e+01  -2.4965878e+01   3.5000000e+02  -2.7275305e-01  -7.7481949e-01  -4.5409484e+00
   2.3485818e+01  -2.4837042e+01   3.5000000e+02  -4.7580889e-02  -1.0131604e+00  -4.5110254e+00
   2.3449774e+01  -2.4711583e+01   3.5000000e+02   1.9546916e-01  -1.2771926e+00  -4.4555403e+00
   2.3394533e+01  -2.4592042e+01   3.5000000e+02   4.4992740e-01  -1.5598875e+00  -4.3678261e+00
   2.3321262e+01  -2.4480829e+01   3.5000000e+02   7.0914934e-01  -1.8531852e+00  -4.2437400e+00
   2.3231482e+01  -2.4380185e+01   3.5000000e+02   9.6688639e-01  -2.1483099e+00  -4.0823021e+00
   2.3127031e+01  -2.4292130e+01   3.5000000e+02   1.2178192e+00  -2.4362622e+00  -3.8859614e+00
   2.3010031e+01  -2.4218429e+01   3.5000000e+02   1.4578700e+00  -2.7083400e+00  -3.6605158e+00
   2.2882839e+01  -2.4160555e+01   3.5000000e+02   1.6842800e+00  -2.9566775e+00  -3.4147067e+00
   2.2748007e+01  -2.4119665e+01   3.5000000e+02   1.8953863e+00  -3.1746876e+00  -3.1596146e+00
   2.2608231e+01  -2.4096575e+01   3.5000000e+02   2.0901949e+00  -3.3574306e+00  -2.9079001e+00
   2.2466298e+01  -2.4091744e+01   3.5000000e+02   2.2678273e+00  -3.5018671e+00  -2.6729664e+00
   2.2325037e+01  -2.4105269e+01   3.5000000e+02   2.4269658e+00  -3.6069721e+00  -2.4680803e+00
   2.2187263e+01  -2.4136881e+01   3.5000000e+02   2.5654471e+00  -3.6737100e+00  -2.3054197e+00
   2.2055726e+01  -2.4185949e+01   3.5000000e+02   2.6800838e+00  -3.7048103e+00  -2.1951091e+00
   2.1933060e+01  -2.4251493e+01   3.5000000e+02   2.7667698e+00  -3.7043339e+00  -2.1443228e+00
   2.1821731e+01  -2.4332204e+01   3.5000000e+02   2.8208550e+00  -3.6770616e+00  -2.1565871e+00
   2.1723990e+01  -2.4426466e+01   3.5000000e+02   2.8377122e+00  -3.6277938e+00  -2.2314286e+00
   2.1641829e+01  -2.4532388e+01   3.5000000e+02   2.8133823e+00  -3.5606816e+00  -2.3644869e+00
   2.1576941e+01  -2.4647842e+01   3.5000000e+02   2.7451751e+00  -3.4787184e+00  -2.5480733e+00
   2.1530681e+01  -2.4770499e+01   3.5000000e+02   2.6321394e+00  -3.3834806e+00  -2.7720294e+00
   2.1504041e+01  -2.4897882e+01   3.5000000e+02   2.4753063e+00  -3.2751145e+00  -3.0247623e+00
   2.1497622e+01  -2.5027408e+01   3.5000000e+02   2.2777378e+00  -3.1525721e+00  -3.2941633e+00
   2.1511616e+01  -2.5156444e+01   3.5000000e+02   2.0443567e+00  -3.0140124e+00  -3.5683678e+00
   2.1545804e+01  -2.5282358e+01   3.5000000e+02   1.7816249e+00  -2.8573214e+00  -3.8362902e+00
   2.1599547e+01  -2.5402574e+01   3.5000000e+02   1.4971340e+00  -2.6807043e+00  -4.0879643e+00
   2.1671799e+01  -2.5514624e+01   3.5000000e+02   1.1991506e+00  -2.4832751e+00  -4.3148105e+00
   2.1761122e+01  -2.5616202e+01   3.5000000e+02   8.9616695e-01  -2.2655788e+00  -4.5098827e+00
   2.1865716e+01  -2.5705211e+01   3.5000000e+02   5.9648680e-01  -2.0299602e+00  -4.6681329e+00
   2.1983447e+01  -2.5779810e+01   3.5000000e+02   3.0786564e-01  -1.7807170e+00  -4.7866671e+00
   2.2111897e+01  -2.5838451e+01   3.5000000e+02   3.7216150e-02  -1.5239790e+00  -4.8649495e+00
   2.2248414e+01  -2.5879917e+01   3.5000000e+02  -2.0960333e-01  -1.2673328e+00  -4.9048699e+00
   2.2390166e+01  -2.5903346e+01   3.5000000e+02  -4.2787649e-01  -1.0192570e+00  -4.9106181e+00
   2.2534204e+01  -2.5908248e+01   3.5000000e+02  -6.1401821e-01  -7.8844053e-01  -4.8883455e+00
   2.2677529e+01  -2.5894523e+01   3.5000000e+02  -7.6549788e-01  -5.8308240e-01  -4.8456115e+00
   2.3395327e+01  -2.5648315e+01   3.5000000e+02  -1.2502016e+00   1.4253025e-01  -4.4266569e+00
   2.3476438e+01  -2.5543687e+01   3.5000000e+02  -1.1837767e+00   1.0240218e-01  -4.4119957e+00
   2.3542550e+01  -2.5430832e+01   3.5000000e+02  -1.0878183e+00   2.4952170e-02  -4.4116162e+00
   2.3592694e+01  -2.5311479e+01   3.5000000e+02  -9.6301178e-01  -8.8517264e-02  -4.4220308e+00
   2.3626151e+01  -2.5187454e+01   3.5000000e+02  -8.1053486e-01  -2.3635491e-01  -4.4379778e+00
   2.3642464e+01  -2.5060648e+01   3.5000000e+02  -6.3227460e-01  -4.1649392e-01  -4.4527944e+00
   2.3641438e+01  -2.4932989e+01   3.5000000e+02  -4.3098531e-01  -6.2632031e-01  -4.4589509e+00
   2.3623142e+01  -2.4806410e+01   3.5000000e+02  -2.1033561e-01  -8.6251237e-01  -4.4486982e+00
   2.3587905e+01  -2.4682823e+01   3.5000000e+02   2.5185717e-02  -1.1209012e+00  -4.4147764e+00
   2.3536306e+01  -2.4564089e+01   3.5000000e+02   2.7052277e-01  -1.3964227e+00  -4.3511089e+00
   2.3469165e+01  -2.4451993e+01   3.5000000e+02   5.2040732e-01  -1.6831731e+00  -4.2534046e+00
   2.3387527e+01  -2.4348212e+01   3.5000000e+02   7.6978436e-01  -1.9746050e+00  -4.1195961e+00
   2.3292645e+01  -2.4254297e+01   3.5000000e+02   1.0141983e+00  -2.2638005e+00  -3.9500835e+00
   2.3185961e+01  -2.4171648e+01   3.5000000e+02   1.2501004e+00  -2.5438134e+00  -3.7477581e+00
   2.3069082e+01  -2.4101496e+01   3.5000000e+02   1.4750098e+00  -2.8080167e+00  -3.5178348e+00
   2.2943759e+01  -2.4044881e+01   3.5000000e+02   1.6875014e+00  -3.0504244e+00  -3.2675302e+00
   2.2811860e+01  -2.4002644e+01   3.5000000e+02   1.8870201e+00  -3.2659527e+00  -3.0056657e+00
   2.2675344e+01  -2.3975411e+01   3.5000000e+02   2.0735634e+00  -3.4506410e+00  -2.7422092e+00
   2.2536233e+01  -2.3963584e+01   3.5000000e+02   2.2472775e+00  -3.6018172e+00  -2.4878023e+00
   2.2396586e+01  -2.3967339e+01   3.5000000e+02   2.4080351e+00  -3.7182041e+00  -2.2532814e+00
   2.2258470e+01  -2.3986621e+01   3.5000000e+02   2.5550771e+00  -3.7999737e+00  -2.0491444e+00
   2.2123927e+01  -2.4021143e+01   3.5000000e+02   2.6867788e+00  -3.8487111e+00  -1.8849611e+00
   2.1994955e+01  -2.4070395e+01   3.5000000e+02   2.8005630e+00  -3.8672409e+00  -1.7687887e+00
   2.1873472e+01  -2.4133646e+01   3.5000000e+02   2.8930166e+00  -3.8593414e+00  -1.7065454e+00
   2.1761292e+01  -2.4209958e+01   3.5000000e+02   2.9601557e+00  -3.8293200e+00  -1.7015302e+00
   2.1660100e+01  -2.4298196e+01   3.5000000e+02   2.9978183e+00  -3.7815268e+00  -1.7541229e+00
   2.1571427e+01  -2.4397046e+01   3.5000000e+02   3.0021151e+00  -3.7198697e+00  -1.8617740e+00
   2.1496626e+01  -2.4505033e+01   3.5000000e+02   2.9698729e+00  -3.6474162e+00  -2.0192826e+00
   2.1436852e+01  -2.4620542e+01   3.5000000e+02   2.8990069e+00  -3.5661365e+00  -2.2193285e+00
   2.1393044e+01  -2.4741841e+01   3.5000000e+02   2.7887824e+00  -3.4768106e+00  -2.4531489e+00
   2.1365907e+01  -2.4867105e+01   3.5000000e+02   2.6399485e+00  -3.3790910e+00  -2.7112281e+00
   2.1355902e+01  -2.4994445e+01   3.5000000e+02   2.4547316e+00  -3.2716828e+00  -2.9839163e+00
   2.1363232e+01  -2.5121935e+01   3.5000000e+02   2.2367209e+00  -3.1526162e+00  -3.2618742e+00
   2.1387842e+01  -2.5247641e+01   3.5000000e+02   1.9906534e+00  -3.0195722e+00  -3.5363769e+00
   2.1429408e+01  -2.5369649e+01   3.5000000e+02   1.7221556e+00  -2.8702565e+00  -3.7994609e+00
   2.1487346e+01  -2.5486095e+01   3.5000000e+02   1.4374438e+00  -2.7027819e+00  -4.0440350e+00
   2.1560817e+01  -2.5595198e+01   3.5000000e+02   1.1430272e+00  -2.5160447e+00  -4.2639668e+00
   2.1648732e+01  -2.5695281e+01   3.5000000e+02   8.4545745e-01  -2.3100735e+00  -4.4541808e+00
   2.1749773e+01  -2.5784802e+01   3.5000000e+02   5.5107226e-01  -2.0862639e+00  -4.6108299e+00
   2.1862409e+01  -2.5862380e+01   3.5000000e+02   2.6578097e-01  -1.8474946e+00  -4.7314717e+00
   2.1984918e+01  -2.5926814e+01   3.5000000e+02  -5.1065993e-03  -1.5980910e+00  -4.8152351e+00
   2.2115417e+01  -2.5977106e+01   3.5000000e+02  -2.5702450e-01  -1.3436181e+00  -4.8629381e+00
   2.2251889e+01  -2.6012474e+01   3.5000000e+02  -4.8621495e-01  -1.0905535e+00  -4.8771040e+00
   2.2392219e+01  -2.6032368e+01   3.5000000e+02  -6.8974854e-01  -8.4584800e-01  -4.8618587e+00
   2.2534225e+01  -2.6036480e+01   3.5000000e+02  -8.6547257e-01  -6.1645450e-01  -4.8226901e+00
   2.2675699e+01  -2.6024745e+01   3.5000000e+02  -1.0119171e+00  -4.0886673e-01  -4.7660852e+00
   2.2814440e+01  -2.5997346e+01   3.5000000e+02  -1.1281838e+00  -2.2873599e-01  -4.6990640e+00
   2.2948295e+01  -2.5954709e+01   3.5000000e+02  -1.2138241e+00  -8.0605112e-02  -4.6286606e+00
   2.3075191e+01  -2.5897496e+01   3.5000000e+02  -1.2687122e+00   3.2201408e-02  -4.5614043e+00
   2.3193172e+01  -2.5826595e+01   3.5000000e+02  -1.2929338e+00   1.0755842e-01  -4.5028368e+00
   2.3300428e+01  -2.5743104e+01   3.5000000e+02  -1.2866818e+00   1.4440001e-01  -4.4571087e+00
   2.3766996e+01  -2.5206421e+01   3.5000000e+02  -1.0399802e+00  -1.5364257e-02  -4.2903988e+00
   2.3783719e+01  -2.5078890e+01   3.5000000e+02  -8.6581177e-01  -1.9234032e-01  -4.3263172e+00
   2.3784834e+01  -2.4950467e+01   3.5000000e+02  -6.7048802e-01  -3.9617713e-01  -4.3559718e+00
   2.3770378e+01  -2.4822711e+01   3.5000000e+02  -4.5683150e-01  -6.2461240e-01  -4.3721028e+00
   2.3740574e+01  -2.4697168e+01   3.5000000e+02  -2.2842319e-01  -8.7472792e-01  -4.3677000e+00
   2.3695825e+01  -2.4575353e+01   3.5000000e+02   1.0555523e-02  -1.1428533e+00  -4.3365289e+00
   2.3636712e+01  -2.4458730e+01   3.5000000e+02   2.5557446e-01  -1.4245509e+00  -4.2736108e+00
   2.3563983e+01  -2.4348698e+01   3.5000000e+02   5.0207433e-01  -1.7146998e+00  -4.1756209e+00
   2.3478542e+01  -2.4246574e+01   3.5000000e+02   7.4580816e-01  -2.0076746e+00  -4.0411549e+00
   2.3381437e+01  -2.4153577e+01   3.5000000e+02   9.8314950e-01  -2.2975855e+00  -3.8708450e+00
   2.3273847e+01  -2.4070813e+01   3.5000000e+02   1.2113222e+00  -2.5785450e+00  -3.6673231e+00
   2.3157070e+01  -2.3999268e+01   3.5000000e+02   1.4285103e+00  -2.8449144e+00  -3.4350689e+00
   2.3032504e+01  -2.3939789e+01   3.5000000e+02   1.6338609e+00  -3.0915495e+00  -3.1801421e+00
   2.2901635e+01  -2.3893081e+01   3.5000000e+02   1.8273363e+00  -3.3139731e+00  -2.9098957e+00
   2.2766016e+01  -2.3859698e+01   3.5000000e+02   2.0094765e+00  -3.5085329e+00  -2.6326572e+00
   2.2627254e+01  -2.3840034e+01   3.5000000e+02   2.1810753e+00  -3.6725235e+00  -2.3574225e+00
   2.2486990e+01  -2.3834322e+01   3.5000000e+02   2.3428308e+00  -3.8042875e+00  -2.0935589e+00
   2.2346878e+01  -2.3842629e+01   3.5000000e+02   2.4950147e+00  -3.9033015e+00  -1.8504775e+00
   2.2208576e+01  -2.3864856e+01   3.5000000e+02   2.6371899e+00  -3.9702109e+00  -1.6372962e+00
   2.2073717e+01  -2.3900742e+01   3.5000000e+02   2.7680534e+00  -4.0068139e+00  -1.4624115e+00
   2.1943900e+01  -2.3949862e+01   3.5000000e+02   2.8853825e+00  -4.0159474e+00  -1.3330373e+00
   2.1820668e+01  -2.4011634e+01   3.5000000e+02   2.9861304e+00  -4.0012626e+00  -1.2547218e+00
   2.1705490e+01  -2.4085325e+01   3.5000000e+02   3.0666396e+00  -3.9668988e+00  -1.2309183e+00
   2.1599747e+01  -2.4170063e+01   3.5000000e+02   3.1229442e+00  -3.9170849e+00  -1.2627094e+00
   2.1504717e+01  -2.4264838e+01   3.5000000e+02   3.1511320e+00  -3.8557429e+00  -1.3486902e+00
   2.1421556e+01  -2.4368522e+01   3.5000000e+02   3.1477091e+00  -3.7861270e+00  -1.4851247e+00
   2.1351286e+01  -2.4479876e+01   3.5000000e+02   3.1099285e+00  -3.7105739e+00  -1.6662881e+00
   2.1294783e+01  -2.4597569e+01   3.5000000e+02   3.0360427e+00  -3.6303699e+00  -1.8849913e+00
   2.1252763e+01  -2.4720187e+01   3.5000000e+02   2.9254775e+00  -3.5457494e+00  -2.1331315e+00
   2.1225776e+01  -2.4846255e+01   3.5000000e+02   2.7788944e+00  -3.4559840e+00  -2.4022617e+00
   2.1214194e+01  -2.4974252e+01   3.5000000e+02   2.5981739e+00  -3.3595509e+00  -2.6840236e+00
   2.1218203e+01  -2.5102628e+01   3.5000000e+02   2.3863153e+00  -3.2543455e+00  -2.9704544e+00
   2.1237805e+01  -2.5229823e+01   3.5000000e+02   2.1472651e+00  -3.1379177e+00  -3.2541774e+00
   2.1272810e+01  -2.5354289e+01   3.5000000e+02   1.8857061e+00  -3.0077322e+00  -3.5284700e+00
   2.1322835e+01  -2.5474505e+01   3.5000000e+02   1.6068375e+00  -2.8614520e+00  -3.7872678e+00
   2.1387313e+01  -2.5588997e+01   3.5000000e+02   1.3161458e+00  -2.6972215e+00  -4.0251802e+00
   2.1465492e+01  -2.5696358e+01   3.5000000e+02   1.0192032e+00  -2.5139501e+00  -4.2375102e+00
   2.1556443e+01  -2.5795263e+01   3.5000000e+02   7.2149399e-01  -2.3115605e+00  -4.4203277e+00
   2.1659074e+01  -2.5884489e+01   3.5000000e+02   4.2824640e-01  -2.0911572e+00  -4.5705989e+00
   2.1772138e+01  -2.5962932e+01   3.5000000e+02   1.4429235e-01  -1.8551107e+00  -4.6863306e+00
   2.1894251e+01  -2.6029616e+01   3.5000000e+02  -1.2604631e-01  -1.6070265e+00  -4.7667222e+00
   2.2023907e+01  -2.6083711e+01   3.5000000e+02  -3.7906169e-01  -1.3515974e+00  -4.8122871e+00
   2.2159501e+01  -2.6124543e+01   3.5000000e+02  -6.1171622e-01  -1.0943535e+00  -4.8249131e+00
   2.2299346e+01  -2.6151603e+01   3.5000000e+02  -8.2164517e-01  -8.4134530e-01  -4.8078380e+00
   2.2441699e+01  -2.6164552e+01   3.5000000e+02  -1.0071178e+00  -5.9877172e-01  -4.7655329e+00
   2.2584779e+01  -2.6163228e+01   3.5000000e+02  -1.1669625e+00  -3.7260925e-01  -4.7034818e+00
   2.2726800e+01  -2.6147648e+01   3.5000000e+02  -1.3004841e+00  -1.6825441e-01  -4.6278688e+00
   2.2865988e+01  -2.6118006e+01   3.5000000e+02  -1.4073553e+00   9.7312794e-03  -4.5452058e+00
   2.3000608e+01  -2.6074673e+01   3.5000000e+02  -1.4875303e+00   1.5779391e-01  -4.4619251e+00
   2.3128985e+01  -2.6018190e+01   3.5000000e+02  -1.5411479e+00   2.7342943e-01  -4.3839899e+00
   2.3249532e+01  -2.5949261e+01   3.5000000e+02  -1.5684517e+00   3.5513361e-01  -4.3165357e+00
   2.3360764e+01  -2.5868743e+01   3.5000000e+02  -1.5696995e+00   4.0225164e-01  -4.2635844e+00
   2.3461321e+01  -2.5777637e+01   3.5000000e+02  -1.5451081e+00   4.1480227e-01  -4.2278065e+00
   2.3549984e+01  -2.5677070e+01   3.5000000e+02  -1.4948148e+00   3.9327564e-01  -4.2103596e+00
   2.3625690e+01  -2.5568286e+01   3.5000000e+02  -1.4189121e+00   3.3846878e-01  -4.2107785e+00
   2.3687542e+01  -2.5452625e+01   3.5000000e+02  -1.3175267e+00   2.5134974e-01  -4.2269560e+00
   2.3734822e+01  -2.5331509e+01   3.5000000e+02  -1.1909812e+00   1.3300359e-01  -4.2551983e+00
   2.3875586e+01  -2.4659982e+01   3.5000000e+02  -3.7969136e-01  -7.4539827e-01  -4.2934752e+00
   2.3830879e+01  -2.4537575e+01   3.5000000e+02  -1.4429138e-01  -1.0110635e+00  -4.2814768e+00
   2.3773097e+01  -2.4419804e+01   3.5000000e+02   9.6620809e-02  -1.2901023e+00  -4.2385785e+00
   2.3702841e+01  -2.4307823e+01   3.5000000e+02   3.3897495e-01  -1.5783098e+00  -4.1613431e+00
   2.3620832e+01  -2.4202727e+01   3.5000000e+02   5.7890160e-01  -1.8709787e+00  -4.0478999e+00
   2.3527895e+01  -2.4105543e+01   3.5000000e+02   8.1300911e-01  -2.1630945e+00  -3.8980592e+00
   2.3424960e+01  -2.4017218e+01   3.5000000e+02   1.0385905e+00  -2.4495352e+00  -3.7133125e+00
   2.3313046e+01  -2.3938609e+01   3.5000000e+02   1.2537776e+00  -2.7252917e+00  -3.4967242e+00
   2.3193253e+01  -2.3870480e+01   3.5000000e+02   1.4575865e+00  -2.9856412e+00  -3.2527580e+00
   2.3066752e+01  -2.3813490e+01   3.5000000e+02   1.6498741e+00  -3.2263058e+00  -2.9870454e+00
   2.2934774e+01  -2.3768190e+01   3.5000000e+02   1.8311970e+00  -3.4435660e+00  -2.7061543e+00
   2.2798599e+01  -2.3735020e+01   3.5000000e+02   2.0025940e+00  -3.6343520e+00  -2.4173722e+00
   2.2659544e+01  -2.3714297e+01   3.5000000e+02   2.1653175e+00  -3.7963365e+00  -2.1284902e+00
   2.2518950e+01  -2.3706224e+01   3.5000000e+02   2.3205380e+00  -3.9280001e+00  -1.8476420e+00
   2.2378173e+01  -2.3710877e+01   3.5000000e+02   2.4690570e+00  -4.0287201e+00  -1.5830982e+00
   2.2238571e+01  -2.3728212e+01   3.5000000e+02   2.6110651e+00  -4.0988285e+00  -1.3430617e+00
   2.2101491e+01  -2.3758062e+01   3.5000000e+02   2.7459699e+00  -4.1396475e+00  -1.1353827e+00
   2.1968257e+01  -2.3800137e+01   3.5000000e+02   2.8723136e+00  -4.1534587e+00  -9.6721221e-01
   2.1840160e+01  -2.3854033e+01   3.5000000e+02   2.9877904e+00  -4.1433778e+00  -8.4463328e-01
   2.1718445e+01  -2.3919227e+01   3.5000000e+02   3.0893644e+00  -4.1131511e+00  -7.7223576e-01
   2.1604300e+01  -2.3995088e+01   3.5000000e+02   3.1734748e+00  -4.0668543e+00  -7.5278718e-01
   2.1498847e+01  -2.4080881e+01   3.5000000e+02   3.2363007e+00  -4.0085528e+00  -7.8700094e-01
   2.1403126e+01  -2.4175771e+01   3.5000000e+02   3.2740654e+00  -3.9419644e+00  -8.7345107e-01
   2.1318092e+01  -2.4278837e+01   3.5000000e+02   3.2833266e+00  -3.8701634e+00  -1.0087288e+00
   2.1244599e+01  -2.4389071e+01   3.5000000e+02   3.2612522e+00  -3.7953840e+00  -1.1876961e+00
   2.1183398e+01  -2.4505397e+01   3.5000000e+02   3.2058244e+00  -3.7189106e+00  -1.4039526e+00
   2.1135123e+01  -2.4626673e+01   3.5000000e+02   3.1159961e+00  -3.6410795e+00  -1.6502802e+00
   2.1100284e+01  -2.4751708e+01   3.5000000e+02   2.9917615e+00  -3.5613498e+00  -1.9191300e+00
   2.1079268e+01  -2.4879269e+01   3.5000000e+02   2.8341643e+00  -3.4784325e+00  -2.2030189e+00
   2.1072323e+01  -2.5008094e+01   3.5000000e+02   2.6452484e+00  -3.3904493e+00  -2.4947969e+00
   2.1079564e+01  -2.5136907e+01   3.5000000e+02   2.4279381e+00  -3.2950995e+00  -2.7878421e+00
   2.1100962e+01  -2.5264425e+01   3.5000000e+02   2.1858997e+00  -3.1898466e+00  -3.0760979e+00
   2.1136349e+01  -2.5389375e+01   3.5000000e+02   1.9233520e+00  -3.0721023e+00  -3.3540904e+00
   2.1185413e+01  -2.5510507e+01   3.5000000e+02   1.6448827e+00  -2.9394332e+00  -3.6168766e+00
   2.1247702e+01  -2.5626604e+01   3.5000000e+02   1.3552756e+00  -2.7897783e+00  -3.8600033e+00
   2.1322627e+01  -2.5736496e+01   3.5000000e+02   1.0593551e+00  -2.6216680e+00  -4.0794953e+00
   2.1409465e+01  -2.5839073e+01   3.5000000e+02   7.6185634e-01  -2.4344312e+00  -4.2718848e+00
   2.1507366e+01  -2.5933295e+01   3.5000000e+02   4.6731796e-01  -2.2283614e+00  -4.4342889e+00
   2.1615363e+01  -2.6018206e+01   3.5000000e+02   1.7997324e-01  -2.0048152e+00  -4.5645308e+00
   2.1732377e+01  -2.6092940e+01   3.5000000e+02  -9.6330399e-02  -1.7662459e+00  -4.6612676e+00
   2.1857230e+01  -2.6156734e+01   3.5000000e+02  -3.5822470e-01  -1.5161375e+00  -4.7241278e+00
   2.1988659e+01  -2.6208937e+01   3.5000000e+02  -6.0288617e-01  -1.2588607e+00  -4.7538157e+00
   2.2125326e+01  -2.6249014e+01   3.5000000e+02  -8.2805561e-01  -9.9947040e-01  -4.7521708e+00
   2.2265835e+01  -2.6276554e+01   3.5000000e+02  -1.0320362e+00  -7.4343549e-01  -4.7221678e+00
   2.2408747e+01  -2.6291274e+01   3.5000000e+02  -1.2136467e+00  -4.9634008e-01  -4.6678406e+00
   2.2552596e+01  -2.6293022e+01   3.5000000e+02  -1.3721502e+00  -2.6357472e-01  -4.5941268e+00
   2.2695905e+01  -2.6281782e+01   3.5000000e+02  -1.5071773e+00  -5.0044850e-02  -4.5066311e+00
   2.2837204e+01  -2.6257668e+01   3.5000000e+02  -1.6186339e+00   1.4005927e-01  -4.4113383e+00
   2.2975043e+01  -2.6220927e+01   3.5000000e+02  -1.7066318e+00   3.0341795e-01  -4.3142875e+00
   2.3108015e+01  -2.6171938e+01   3.5000000e+02  -1.7714319e+00   4.3765592e-01  -4.2212388e+00
   2.3234764e+01  -2.6111201e+01   3.5000000e+02  -1.8133606e+00   5.4129135e-01  -4.1373955e+00
   2.3354006e+01  -2.6039339e+01   3.5000000e+02  -1.8327659e+00   6.1364746e-01  -4.0671423e+00
   2.3464538e+01  -2.5957085e+01   3.5000000e+02  -1.8299389e+00   6.5468215e-01  -4.0138659e+00
   2.3565255e+01  -2.5865276e+01   3.5000000e+02  -1.8050683e+00   6.6481947e-01  -3.9798005e+00
   2.3655157e+01  -2.5764847e+01   3.5000000e+02  -1.7582107e+00   6.4477529e-01  -3.9659254e+00
   2.3733362e+01  -2.5656816e+01   3.5000000e+02  -1.6892976e+00   5.9540620e-01  -3.9718986e+00
   2.3799113e+01  -2.5542275e+01   3.5000000e+02  -1.5981983e+00   5.1759944e-01  -3.9960311e+00
   2.3851784e+01  -2.5422380e+01   3.5000000e+02  -1.4848385e+00   4.1221251e-01  -4.0353135e+00
   2.3890885e+01  -2.5298334e+01   3.5000000e+02  -1.3493503e+00   2.8006087e-01  -4.0855143e+00
   2.3916068e+01  -2.5171383e+01   3.5000000e+02  -1.1922653e+00   1.2198647e-01  -4.1413366e+00
   2.3927125e+01  -2.5042792e+01   3.5000000e+02  -1.0146559e+00  -6.1056213e-02  -4.1966773e+00
   2.3923990e+01  -2.4913844e+01   3.5000000e+02  -8.1827207e-01  -2.6783492e-01  -4.2449299e+00
   2.3906739e+01  -2.4785818e+01   3.5000000e+02  -6.0557320e-01  -4.9669255e-01  -4.2793547e+00
   2.3728573e+01  -2.4121189e+01   3.5000000e+02   5.0089233e-01  -1.8460615e+00  -4.0009358e+00
   2.3635549e+01  -2.4023575e+01   3.5000000e+02   7.2858858e-01  -2.1373614e+00  -3.8586720e+00
   2.3533333e+01  -2.3934023e+01   3.5000000e+02   9.4747619e-01  -2.4239195e+00  -3.6813751e+00
   2.3422770e+01  -2.3853255e+01   3.5000000e+02   1.1558890e+00  -2.7013304e+00  -3.4715657e+00
   2.3304766e+01  -2.3781924e+01   3.5000000e+02   1.3529623e+00  -2.9654064e+00  -3.2329316e+00
   2.3180283e+01  -2.3720604e+01   3.5000000e+02   1.5386176e+00  -3.2122966e+00  -2.9701364e+00
   2.3050332e+01  -2.3669791e+01   3.5000000e+02   1.7134685e+00  -3.4385633e+00  -2.6886390e+00
   2.2915960e+01  -2.3629891e+01   3.5000000e+02   1.8786746e+00  -3.6412625e+00  -2.3944972e+00
   2.2778251e+01  -2.3601225e+01   3.5000000e+02   2.0357189e+00  -3.8179751e+00  -2.0942512e+00
   2.2638311e+01  -2.3584025e+01   3.5000000e+02   2.1861783e+00  -3.9668743e+00  -1.7947967e+00
   2.2497262e+01  -2.3578427e+01   3.5000000e+02   2.3314705e+00  -4.0867949e+00  -1.5032774e+00
   2.2356235e+01  -2.3584476e+01   3.5000000e+02   2.4726168e+00  -4.1773018e+00  -1.2269930e+00
   2.2216360e+01  -2.3602125e+01   3.5000000e+02   2.6100457e+00  -4.2387654e+00  -9.7325488e-01
   2.2078760e+01  -2.3631230e+01   3.5000000e+02   2.7434472e+00  -4.2724163e+00  -7.4917876e-01
   2.1944540e+01  -2.3671560e+01   3.5000000e+02   2.8717037e+00  -4.2803377e+00  -5.6143713e-01
   2.1814781e+01  -2.3722789e+01   3.5000000e+02   2.9928907e+00  -4.2654016e+00  -4.1591629e-01
   2.1690531e+01  -2.3784506e+01   3.5000000e+02   3.1043615e+00  -4.2311050e+00  -3.1738480e-01
   2.1572798e+01  -2.3856215e+01   3.5000000e+02   3.2028974e+00  -4.1813386e+00  -2.6915708e-01
   2.1462542e+01  -2.3937336e+01   3.5000000e+02   3.2849155e+00  -4.1201012e+00  -2.7282639e-01
   2.1360668e+01  -2.4027215e+01   3.5000000e+02   3.3467107e+00  -4.0511920e+00  -3.2814454e-01
   2.1268016e+01  -2.4125126e+01   3.5000000e+02   3.3847089e+00  -3.9779360e+00  -4.3301912e-01
   2.1185358e+01  -2.4230273e+01   3.5000000e+02   3.3957048e+00  -3.9029703e+00  -5.8367719e-01
   2.1113392e+01  -2.4341804e+01   3.5000000e+02   3.3770660e+00  -3.8281047e+00  -7.7498912e-01
   2.1052731e+01  -2.4458811e+01   3.5000000e+02   3.3268986e+00  -3.7542783e+00  -1.0008240e+00
   2.1003903e+01  -2.4580337e+01   3.5000000e+02   3.2441544e+00  -3.6815873e+00  -1.2544789e+00
   2.0967340e+01  -2.4705388e+01   3.5000000e+02   3.1286872e+00  -3.6093660e+00  -1.5290736e+00
   2.0943381e+01  -2.4832937e+01   3.5000000e+02   2.9812585e+00  -3.5363070e+00  -1.8178776e+00
   2.0932261e+01  -2.4961935e+01   3.5000000e+02   2.8034979e+00  -3.4605906e+00  -2.1145339e+00
   2.0934113e+01  -2.5091316e+01   3.5000000e+02   2.5978230e+00  -3.3800195e+00  -2.4131915e+00
   2.0948962e+01  -2.5220008e+01   3.5000000e+02   2.3673190e+00  -3.2921493e+00  -2.7085489e+00
   2.0976725e+01  -2.5346941e+01   3.5000000e+02   2.1155936e+00  -3.1944214e+00  -2.9958353e+00
   2.1017212e+01  -2.5471057e+01   3.5000000e+02   1.8466151e+00  -3.0843018e+00  -3.2707564e+00
   2.1070124e+01  -2.5591318e+01   3.5000000e+02   1.5645615e+00  -2.9594371e+00  -3.5294193e+00
   2.1135052e+01  -2.5706714e+01   3.5000000e+02   1.2736881e+00  -2.8178263e+00  -3.7682708e+00
   2.1211486e+01  -2.5816275e+01   3.5000000e+02   9.7820674e-01  -2.6579882e+00  -3.9840883e+00
   2.1298812e+01  -2.5919076e+01   3.5000000e+02   6.8221105e-01  -2.4791349e+00  -4.1739809e+00
   2.1396318e+01  -2.6014246e+01   3.5000000e+02   3.8960318e-01  -2.2813084e+00  -4.3354555e+00
   2.1503202e+01  -2.6100978e+01   3.5000000e+02   1.0401977e-01  -2.0654665e+00  -4.4665166e+00
   2.1618575e+01  -2.6178534e+01   3.5000000e+02  -1.7122824e-01  -1.8335211e+00  -4.5657780e+00
   2.1741470e+01  -2.6246251e+01   3.5000000e+02  -4.3322264e-01  -1.5883051e+00  -4.6325878e+00
   2.1870849e+01  -2.6303553e+01   3.5000000e+02  -6.7950641e-01  -1.3334761e+00  -4.6671368e+00
   2.2005615e+01  -2.6349947e+01   3.5000000e+02  -9.0810127e-01  -1.0733733e+00  -4.6705480e+00
   2.2144619e+01  -2.6385037e+01   3.5000000e+02  -1.1175282e+00  -8.1281752e-01  -4.6449167e+00
   2.2286673e+01  -2.6408521e+01   3.5000000e+02  -1.3067662e+00  -5.5688289e-01  -4.5933095e+00
   2.2430558e+01  -2.6420198e+01   3.5000000e+02  -1.4752000e+00  -3.1064285e-01  -4.5196934e+00
   2.2575040e+01  -2.6419967e+01   3.5000000e+02  -1.6225463e+00  -7.8907426e-02  -4.4288016e+00
   2.2718877e+01  -2.6407830e+01   3.5000000e+02  -1.7487764e+00   1.3400942e-01  -4.3259313e+00
   2.2860835e+01  -2.6383891e+01   3.5000000e+02  -1.8540499e+00   3.2448646e-01  -4.2166907e+00
   2.2999697e+01  -2.6348357e+01   3.5000000e+02  -1.9386581e+00   4.8971493e-01  -4.1067205e+00
   2.3134275e+01  -2.6301531e+01   3.5000000e+02  -2.0029688e+00   6.2773474e-01  -4.0014274e+00
   2.3263423e+01  -2.6243816e+01   3.5000000e+02  -2.0473968e+00   7.3740737e-01  -3.9057281e+00
   2.3386045e+01  -2.6175706e+01   3.5000000e+02  -2.0723475e+00   8.1830458e-01  -3.8238619e+00
   2.3501106e+01  -2.6097781e+01   3.5000000e+02  -2.0781691e+00   8.7056630e-01  -3.7592414e+00
   2.3607643e+01  -2.6010708e+01   3.5000000e+02  -2.0651134e+00   8.9474894e-01  -3.7143335e+00
   2.3704769e+01  -2.5915227e+01   3.5000000e+02  -2.0332779e+00   8.9165230e-01  -3.6906027e+00
   2.3791685e+01  -2.5812147e+01   3.5000000e+02  -1.9825948e+00   8.6218634e-01  -3.6884473e+00
   2.3867684e+01  -2.5702342e+01   3.5000000e+02  -1.9128474e+00   8.0725751e-01  -3.7071659e+00
   2.3932155e+01  -2.5586739e+01   3.5000000e+02  -1.8237210e+00   7.2768105e-01  -3.7449571e+00
   2.3984591e+01  -2.5466309e+01   3.5000000e+02  -1.7149081e+00   6.2414165e-01  -3.7989396e+00
   2.4024590e+01  -2.5342065e+01   3.5000000e+02  -1.5862526e+00   4.9720145e-01  -3.8652171e+00
   2.4051855e+01  -2.5215044e+01   3.5000000e+02  -1.4378884e+00   3.4733356e-01  -3.9390120e+00
   2.4066201e+01  -2.5086305e+01   3.5000000e+02  -1.2704044e+00   1.7503062e-01  -4.0148224e+00
   2.4067549e+01  -2.4956919e+01   3.5000000e+02  -1.0849522e+00  -1.9074426e-02  -4.0866552e+00
   2.4055928e+01  -2.4827958e+01   3.5000000e+02  -8.8331157e-01  -2.3406012e-01  -4.1482879e+00
   2.4031475e+01  -2.4700486e+01   3.5000000e+02  -6.6789325e-01  -4.6857006e-01  -4.1935588e+00
   2.3994430e+01  -2.4575552e+01   3.5000000e+02  -4.4166993e-01  -7.2069719e-01  -4.2166772e+00
   2.3945134e+01  -2.4454183e+01   3.5000000e+02  -2.0804658e-01  -9.8791439e-01  -4.2125268e+00
   2.3884024e+01  -2.4337372e+01   3.5000000e+02   2.9332513e-02  -1.2670815e+00  -4.1769462e+00
   2.3811632e+01  -2.4226071e+01   3.5000000e+02   2.6679785e-01  -1.5545050e+00  -4.1069582e+00
   2.3375689e+01  -2.3671439e+01   3.5000000e+02   1.3049634e+00  -3.0263291e+00  -3.1353877e+00
   2.3252789e+01  -2.3610399e+01   3.5000000e+02   1.4775777e+00  -3.2687328e+00  -2.8738203e+00
   2.3124911e+01  -2.3558757e+01   3.5000000e+02   1.6398707e+00  -3.4925300e+00  -2.5931266e+00
   2.2992907e+01  -2.3516857e+01   3.5000000e+02   1.7930894e+00  -3.6951605e+00  -2.2983409e+00
   2.2857652e+01  -2.3484975e+01   3.5000000e+02   1.9388172e+00  -3.8744527e+00  -1.9948400e+00
   2.2720038e+01  -2.3463321e+01   3.5000000e+02   2.0787873e+00  -4.0286502e+00  -1.6882811e+00
   2.2580974e+01  -2.3452037e+01   3.5000000e+02   2.2146772e+00  -4.1564540e+00  -1.3845673e+00
   2.2441376e+01  -2.3451200e+01   3.5000000e+02   2.3479192e+00  -4.2570870e+00  -1.0898094e+00
   2.2302165e+01  -2.3460813e+01   3.5000000e+02   2.4795166e+00  -4.3303763e+00  -8.1025934e-01
   2.2164258e+01  -2.3480814e+01   3.5000000e+02   2.6099053e+00  -4.3768212e+00  -5.5222975e-01
   2.2028563e+01  -2.3511070e+01   3.5000000e+02   2.7388499e+00  -4.3976534e+00  -3.2193073e-01
   2.1895979e+01  -2.3551382e+01   3.5000000e+02   2.8653926e+00  -4.3948422e+00  -1.2528267e-01
   2.1767383e+01  -2.3601484e+01   3.5000000e+02   2.9878655e+00  -4.3710492e+00   3.2368704e-02
   2.1643629e+01  -2.3661045e+01   3.5000000e+02   3.1039511e+00  -4.3295042e+00   1.4653311e-01
   2.1525543e+01  -2.3729670e+01   3.5000000e+02   3.2107965e+00  -4.2738194e+00   2.1386341e-01
   2.1413916e+01  -2.3806904e+01   3.5000000e+02   3.3051730e+00  -4.2077521e+00   2.3239402e-01
   2.1309500e+01  -2.3892235e+01   3.5000000e+02   3.3836604e+00  -4.1349506e+00   2.0169210e-01
   2.1213003e+01  -2.3985096e+01   3.5000000e+02   3.4428459e+00  -4.0587141e+00   1.2290455e-01
   2.1125086e+01  -2.4084868e+01   3.5000000e+02   3.4795179e+00  -3.9817942e+00  -1.3222230e-03
   2.1046355e+01  -2.4190885e+01   3.5000000e+02   3.4908447e+00  -3.9062569e+00  -1.6703037e-01
   2.0977359e+01  -2.4302438e+01   3.5000000e+02   3.4745200e+00  -3.8334151e+00  -3.6923591e-01
   2.0918587e+01  -2.4418778e+01   3.5000000e+02   3.4288750e+00  -3.7638277e+00  -6.0225809e-01
   2.0870461e+01  -2.4539125e+01   3.5000000e+02   3.3529511e+00  -3.6973467e+00  -8.6006591e-01
   2.0833338e+01  -2.4662665e+01   3.5000000e+02   3.2465421e+00  -3.6332074e+00  -1.1365750e+00
   2.0807500e+01  -2.4788566e+01   3.5000000e+02   3.1101932e+00  -3.5701248e+00  -1.4259146e+00
   2.0793157e+01  -2.4915972e+01   3.5000000e+02   2.9451827e+00  -3.5064062e+00  -1.7225807e+00
   2.0790442e+01  -2.5044017e+01   3.5000000e+02   2.7534575e+00  -3.4400474e+00  -2.0215517e+00
   2.0799410e+01  -2.5171828e+01   3.5000000e+02   2.5375480e+00  -3.3688264e+00  -2.3183116e+00
   2.0820036e+01  -2.5298531e+01   3.5000000e+02   2.3004569e+00  -3.2903907e+00  -2.6088255e+00
   2.0852214e+01  -2.5423255e+01   3.5000000e+02   2.0455348e+00  -3.2023477e+00  -2.8894799e+00
   2.0895760e+01  -2.5545142e+01   3.5000000e+02   1.7763402e+00  -3.1023588e+00  -3.1570224e+00
   2.0950406e+01  -2.5663350e+01   3.5000000e+02   1.4965287e+00  -2.9882549e+00  -3.4084721e+00
   2.1015807e+01  -2.5777060e+01   3.5000000e+02   1.2097487e+00  -2.8581595e+00  -3.6410752e+00
   2.1091539e+01  -2.5885481e+01   3.5000000e+02   9.1957297e-01  -2.7106240e+00  -3.8522681e+00
   2.1177102e+01  -2.5987858e+01   3.5000000e+02   6.2944229e-01  -2.5447564e+00  -4.0396857e+00
   2.1271924e+01  -2.6083476e+01   3.5000000e+02   3.4262818e-01  -2.3603332e+00  -4.2012014e+00
   2.1375364e+01  -2.6171663e+01   3.5000000e+02   6.2199900e-02  -2.1578817e+00  -4.3349973e+00
   2.1486712e+01  -2.6251800e+01   3.5000000e+02  -2.0902796e-01  -1.9387205e+00  -4.4396535e+00
   2.1605202e+01  -2.6323323e+01   3.5000000e+02  -4.6854804e-01  -1.7049462e+00  -4.5142587e+00
   2.1730011e+01  -2.6385727e+01   3.5000000e+02  -7.1420542e-01  -1.4593910e+00  -4.5585047e+00
   2.1860266e+01  -2.6438570e+01   3.5000000e+02  -9.4423902e-01  -1.2055331e+00  -4.5727798e+00
   2.1995052e+01  -2.6481479e+01   3.5000000e+02  -1.1573072e+00  -9.4736506e-01  -4.5582403e+00
   2.2133419e+01  -2.6514149e+01   3.5000000e+02  -1.3524714e+00  -6.8924084e-01  -4.5168556e+00
   2.2274388e+01  -2.6536348e+01   3.5000000e+02  -1.5291648e+00  -4.3568983e-01  -4.4514115e+00
   2.2416960e+01  -2.6547918e+01   3.5000000e+02  -1.6871356e+00  -1.9121179e-01  -4.3654654e+00
   2.2560121e+01  -2.6548777e+01   3.5000000e+02  -1.8263782e+00   3.9929198e-02  -4.2632463e+00
   2.2702855e+01  -2.6538919e+01   3.5000000e+02  -1.9470701e+00   2.5390908e-01  -4.1494962e+00
   2.2844148e+01  -2.6518414e+01   3.5000000e+02  -2.0495099e+00   4.4750005e-01  -4.0292706e+00
   2.2982999e+01  -2.6487408e+01   3.5000000e+02  -2.1340763e+00   6.1818526e-01  -3.9077067e+00
   2.3118424e+01  -2.6446121e+01   3.5000000e+02  -2.2011897e+00   7.6419687e-01  -3.7897991e+00
   2.3249467e+01  -2.6394845e+01   3.5000000e+02  -2.2512895e+00   8.8449963e-01  -3.6801886e+00
   2.3375208e+01  -2.6333945e+01   3.5000000e+02  -2.2848138e+00   9.7871719e-01  -3.5829851e+00
   2.3494767e+01  -2.6263850e+01   3.5000000e+02  -2.3021576e+00   1.0470045e+00  -3.5016578e+00
   2.3607312e+01  -2.6185057e+01   3.5000000e+02  -2.3036481e+00   1.0899208e+00  -3.4389366e+00
   2.3712068e+01  -2.6098119e+01   3.5000000e+02  -2.2894960e+00   1.1082839e+00  -3.3967683e+00
   2.3808315e+01  -2.6003648e+01   3.5000000e+02  -2.2597624e+00   1.1030412e+00  -3.3762840e+00
   2.3895402e+01  -2.5902307e+01   3.5000000e+02  -2.2143423e+00   1.0751638e+00  -3.3777658e+00
   2.3972745e+01  -2.5794804e+01   3.5000000e+02  -2.1529603e+00   1.0255501e+00  -3.4006443e+00
   2.4039831e+01  -2.5681889e+01   3.5000000e+02  -2.0752101e+00   9.5496382e-01  -3.4434895e+00
   2.4096225e+01  -2.5564347e+01   3.5000000e+02  -1.9806272e+00   8.6399826e-01  -3.5040169e+00
   2.4141569e+01  -2.5442993e+01   3.5000000e+02  -1.8687879e+00   7.5306527e-01  -3.5791286e+00
   2.4175583e+01  -2.5318666e+01   3.5000000e+02  -1.7394296e+00   6.2241873e-01  -3.6649811e+00
   2.4198068e+01  -2.5192222e+01   3.5000000e+02  -1.5925783e+00   4.7221341e-01  -3.7570830e+00
   2.4208907e+01  -2.5064529e+01   3.5000000e+02  -1.4286653e+00   3.0259764e-01  -3.8504268e+00
   2.4208062e+01  -2.4936463e+01   3.5000000e+02  -1.2486137e+00   1.1382991e-01  -3.9396554e+00
   2.4195575e+01  -2.4808896e+01   3.5000000e+02  -1.0538793e+00  -9.3598729e-02  -4.0192533e+00
   2.4171566e+01  -2.4682697e+01   3.5000000e+02  -8.4646022e-01  -3.1882978e-01  -4.0837510e+00
   2.4136234e+01  -2.4558721e+01   3.5000000e+02  -6.2884570e-01  -5.6053836e-01  -4.1279477e+00
   2.4089849e+01  -2.4437808e+01   3.5000000e+02  -4.0391940e-01  -8.1686878e-01  -4.1471408e+00
   2.4032755e+01  -2.4320772e+01   3.5000000e+02  -1.7482552e-01  -1.0854222e+00  -4.1373375e+00
   2.3965366e+01  -2.4208401e+01   3.5000000e+02   5.5190655e-02  -1.3632875e+00  -4.0954485e+00
   2.3888159e+01  -2.4101448e+01   3.5000000e+02   2.8297491e-01  -1.6471393e+00  -4.0194348e+00
   2.3801674e+01  -2.4000630e+01   3.5000000e+02   5.0563674e-01  -1.9333469e+00  -3.9083980e+00
   2.3706508e+01  -2.3906619e+01   3.5000000e+02   7.2072294e-01  -2.2181235e+00  -3.7625987e+00
   2.3603315e+01  -2.3820042e+01   3.5000000e+02   9.2634159e-01  -2.4976515e+00  -3.5834192e+00
   2.3492793e+01  -2.3741475e+01   3.5000000e+02   1.1212668e+00  -2.7682235e+00  -3.3732560e+00
   2.2885146e+01  -2.3358892e+01   3.5000000e+02   1.8818262e+00  -3.9868371e+00  -1.7918057e+00
   2.2747192e+01  -2.3336925e+01   3.5000000e+02   2.0105183e+00  -4.1377744e+00  -1.4765875e+00
   2.2607843e+01  -2.3324592e+01   3.5000000e+02   2.1362814e+00  -4.2636345e+00  -1.1623291e+00
   2.2467885e+01  -2.3321961e+01   3.5000000e+02   2.2607562e+00  -4.3635688e+00  -8.5437329e-01
   2.2328108e+01  -2.3329048e+01   3.5000000e+02   2.3852165e+00  -4.4372101e+00  -5.5827037e-01
   2.2189302e+01  -2.3345813e+01   3.5000000e+02   2.5104354e+00  -4.4847628e+00  -2.7972656e-01
   2.2052250e+01  -2.3372160e+01   3.5000000e+02   2.6365877e+00  -4.5070792e+00  -2.4502514e-02
   2.1917727e+01  -2.3407942e+01   3.5000000e+02   2.7631911e+00  -4.5056993e+00   2.0172128e-01
   2.1786497e+01  -2.3452954e+01   3.5000000e+02   2.8890836e+00  -4.4828530e+00   3.9357027e-01
   2.1659305e+01  -2.3506944e+01   3.5000000e+02   3.0124624e+00  -4.4413842e+00   5.4621185e-01
   2.1536875e+01  -2.3569604e+01   3.5000000e+02   3.1309477e+00  -4.3846242e+00   6.5564667e-01
   2.1419911e+01  -2.3640580e+01   3.5000000e+02   3.2416959e+00  -4.3161969e+00   7.1892864e-01
   2.1309083e+01  -2.3719467e+01   3.5000000e+02   3.3415451e+00  -4.2397974e+00   7.3441264e-01
   2.1205035e+01  -2.3805818e+01   3.5000000e+02   3.4271734e+00  -4.1589570e+00   7.0183370e-01
   2.1108372e+01  -2.3899139e+01   3.5000000e+02   3.4952724e+00  -4.0768332e+00   6.2237891e-01
   2.1019662e+01  -2.3998898e+01   3.5000000e+02   3.5427111e+00  -3.9960380e+00   4.9857916e-01
   2.0939431e+01  -2.4104524e+01   3.5000000e+02   3.5666860e+00  -3.9185277e+00   3.3415198e-01
   2.0868161e+01  -2.4215411e+01   3.5000000e+02   3.5648453e+00  -3.8455520e+00   1.3374752e-01
   2.0806283e+01  -2.4330923e+01   3.5000000e+02   3.5353866e+00  -3.7776580e+00  -9.7341833e-02
   2.0754180e+01  -2.4450392e+01   3.5000000e+02   3.4771243e+00  -3.7147450e+00  -3.5348041e-01
   2.0712181e+01  -2.4573129e+01   3.5000000e+02   3.3895276e+00  -3.6561402e+00  -6.2898585e-01
   2.0680558e+01  -2.4698422e+01   3.5000000e+02   3.2727386e+00  -3.6006963e+00  -9.1834214e-01
   2.0659528e+01  -2.4825544e+01   3.5000000e+02   3.1275595e+00  -3.5468856e+00  -1.2163891e+00
   2.0649244e+01  -2.4953753e+01   3.5000000e+02   2.9554274e+00  -3.4928896e+00  -1.5183982e+00
   2.0649800e+01  -2.5082300e+01   3.5000000e+02   2.7583499e+00  -3.4366748e+00  -1.8201385e+00
   2.0661227e+01  -2.5210431e+01   3.5000000e+02   2.5388265e+00  -3.3760598e+00  -2.1178567e+00
   2.0683492e+01  -2.5337393e+01   3.5000000e+02   2.2997417e+00  -3.3087749e+00  -2.4082375e+00
   2.0716498e+01  -2.5462436e+01   3.5000000e+02   2.0442501e+00  -3.2325245e+00  -2.6883340e+00
   2.0760083e+01  -2.5584819e+01   3.5000000e+02   1.7756558e+00  -3.1450568e+00  -2.9554939e+00
   2.0814019e+01  -2.5703817e+01   3.5000000e+02   1.4973005e+00  -3.0442466e+00  -3.2072858e+00
   2.0878018e+01  -2.5818719e+01   3.5000000e+02   1.2124898e+00  -2.9281948e+00  -3.4414378e+00
   2.0951725e+01  -2.5928839e+01   3.5000000e+02   9.2442844e-01  -2.7953388e+00  -3.6557905e+00
   2.1034725e+01  -2.6033518e+01   3.5000000e+02   6.3618847e-01  -2.6445637e+00  -3.8482915e+00
   2.1126546e+01  -2.6132125e+01   3.5000000e+02   3.5069617e-01  -2.4753053e+00  -4.0170146e+00
   2.1226655e+01  -2.6224067e+01   3.5000000e+02   7.0705493e-02  -2.2876338e+00  -4.1602021e+00
   2.1334468e+01  -2.6308787e+01   3.5000000e+02  -2.0122108e-01  -2.0823028e+00  -4.2763455e+00
   2.1449347e+01  -2.6385773e+01   3.5000000e+02  -4.6275819e-01  -1.8607679e+00  -4.3642655e+00
   2.1570610e+01  -2.6454557e+01   3.5000000e+02  -7.1186064e-01  -1.6251647e+00  -4.4232114e+00
   2.1697530e+01  -2.6514720e+01   3.5000000e+02  -9.4681011e-01  -1.3782639e+00  -4.4529494e+00
   2.1829343e+01  -2.6565895e+01   3.5000000e+02  -1.1662536e+00  -1.1233876e+00  -4.4538497e+00
   2.1965251e+01  -2.6607770e+01   3.5000000e+02  -1.3692163e+00  -8.6430558e-01  -4.4269577e+00
   2.2104427e+01  -2.6640090e+01   3.5000000e+02  -1.5550887e+00  -6.0510487e-01  -4.3740457e+00
   2.2246024e+01  -2.6662655e+01   3.5000000e+02  -1.7235855e+00  -3.5003093e-01  -4.2976373e+00
   2.2389175e+01  -2.6675328e+01   3.5000000e+02  -1.8746958e+00  -1.0331348e-01  -4.2009777e+00
   2.2533005e+01  -2.6678032e+01   3.5000000e+02  -2.0086154e+00   1.3102673e-01  -4.0879632e+00
   2.2676632e+01  -2.6670749e+01   3.5000000e+02  -2.1256750e+00   3.4935010e-01  -3.9630192e+00
   2.2819178e+01  -2.6653524e+01   3.5000000e+02  -2.2262948e+00   5.4856678e-01  -3.8309154e+00
   2.2959771e+01  -2.6626464e+01   3.5000000e+02  -2.3109379e+00   7.2624233e-01  -3.6965652e+00
   2.3097552e+01  -2.6589733e+01   3.5000000e+02  -2.3800775e+00   8.8065113e-01  -3.5648177e+00
   2.3231682e+01  -2.6543556e+01   3.5000000e+02  -2.4341890e+00   1.0107774e+00  -3.4402474e+00
   2.3361348e+01  -2.6488215e+01   3.5000000e+02  -2.4737333e+00   1.1162516e+00  -3.3269914e+00
   2.3485766e+01  -2.6424049e+01   3.5000000e+02  -2.4991419e+00   1.1972468e+00  -3.2286269e+00
   2.3604188e+01  -2.6351448e+01   3.5000000e+02  -2.5107919e+00   1.2543508e+00  -3.1480975e+00
   2.3715908e+01  -2.6270853e+01   3.5000000e+02  -2.5089800e+00   1.2884371e+00  -3.0876630e+00
   2.3820262e+01  -2.6182753e+01   3.5000000e+02  -2.4938833e+00   1.3005349e+00  -3.0488892e+00
   2.3916638e+01  -2.6087682e+01   3.5000000e+02  -2.4655327e+00   1.2917247e+00  -3.0326293e+00
   2.4004476e+01  -2.5986214e+01   3.5000000e+02  -2.4237851e+00   1.2630420e+00  -3.0390298e+00
   2.4083268e+01  -2.5878959e+01   3.5000000e+02  -2.3683187e+00   1.2154031e+00  -3.0675338e+00
   2.4152569e+01  -2.5766561e+01   3.5000000e+02  -2.2986661e+00   1.1495613e+00  -3.1168615e+00
   2.4211992e+01  -2.5649693e+01   3.5000000e+02  -2.2142605e+00   1.0660675e+00  -3.1850329e+00
   2.4261212e+01  -2.5529053e+01   3.5000000e+02  -2.1145184e+00   9.6526092e-01  -3.2693859e+00
   2.4299968e+01  -2.5405359e+01   3.5000000e+02  -1.9989404e+00   8.4728068e-01  -3.3666183e+00
   2.4328063e+01  -2.5279343e+01   3.5000000e+02  -1.8672185e+00   7.1210228e-01  -3.4728560e+00
   2.4345364e+01  -2.5151752e+01   3.5000000e+02  -1.7193492e+00   5.5961060e-01  -3.5837352e+00
   2.4351805e+01  -2.5023336e+01   3.5000000e+02  -1.5557180e+00   3.8968558e-01  -3.6945166e+00
   2.4347380e+01  -2.4894850e+01   3.5000000e+02  -1.3771644e+00   2.0231633e-01  -3.8002165e+00
   2.4332151e+01  -2.4767047e+01   3.5000000e+02  -1.1850215e+00  -2.2735362e-03  -3.8957427e+00
   2.4306238e+01  -2.4640673e+01   3.5000000e+02  -9.8109873e-01  -2.2352137e-01  -3.9760676e+00
   2.4269825e+01  -2.4516463e+01   3.5000000e+02  -7.6765145e-01  -4.6042461e-01  -4.0363920e+00
   2.4223154e+01  -2.4395138e+01   3.5000000e+02  -5.4729950e-01  -7.1148526e-01  -4.0723312e+00
   2.4166523e+01  -2.4277400e+01   3.5000000e+02  -3.2291673e-01  -9.7469718e-01  -4.0800951e+00
   2.4100285e+01  -2.4163929e+01   3.5000000e+02  -9.7498451e-02  -1.2475747e+00  -4.0566524e+00
   2.4024848e+01  -2.4055378e+01   3.5000000e+02   1.2598882e-01  -1.5272241e+00  -3.9998652e+00
   2.3940665e+01  -2.3952370e+01   3.5000000e+02   3.4477531e-01  -1.8104565e+00  -3.9085792e+00
   2.3848239e+01  -2.3855496e+01   3.5000000e+02   5.5642503e-01  -2.0938964e+00  -3.7826569e+00
   2.3748115e+01  -2.3765309e+01   3.5000000e+02   7.5897468e-01  -2.3741156e+00  -3.6229514e+00
   2.3640879e+01  -2.3682323e+01   3.5000000e+02   9.5102619e-01  -2.6477399e+00  -3.4312314e+00
   2.3527155e+01  -2.3607013e+01   3.5000000e+02   1.1318046e+00  -2.9115362e+00  -3.2100712e+00
   2.3407598e+01  -2.3539804e+01   3.5000000e+02   1.3011829e+00  -3.1624955e+00  -2.9626989e+00
   2.3282895e+01  -2.3481081e+01   3.5000000e+02   1.4596429e+00  -3.3978501e+00  -2.6928799e+00
   2.3153759e+01  -2.3431174e+01   3.5000000e+02   1.6082124e+00  -3.6151149e+00  -2.4047712e+00
   2.3020924e+01  -2.3390368e+01   3.5000000e+02   1.7483551e+00  -3.8120823e+00  -2.1028424e+00
   2.2313461e+01  -2.3201601e+01   3.5000000e+02   2.3052902e+00  -4.5518940e+00  -2.3933404e-01
   2.2174341e+01  -2.3218180e+01   3.5000000e+02   2.4242840e+00  -4.5930566e+00   5.1603287e-02
   2.2036814e+01  -2.3243714e+01   3.5000000e+02   2.5461231e+00  -4.6096552e+00   3.2173733e-01
   2.1901552e+01  -2.3278077e+01   3.5000000e+02   2.6705474e+00  -4.6030212e+00   5.6573195e-01
   2.1769220e+01  -2.3321100e+01   3.5000000e+02   2.7966678e+00  -4.5751490e+00   7.7839540e-01
   2.1640468e+01  -2.3372575e+01   3.5000000e+02   2.9229884e+00  -4.5286519e+00   9.5490487e-01
   2.1515932e+01  -2.3432246e+01   3.5000000e+02   3.0474449e+00  -4.4666634e+00   1.0910678e+00
   2.1396230e+01  -2.3499823e+01   3.5000000e+02   3.1675011e+00  -4.3926693e+00   1.1835346e+00
   2.1281956e+01  -2.3574971e+01   3.5000000e+02   3.2802515e+00  -4.3103138e+00   1.2300510e+00
   2.1173683e+01  -2.3657321e+01   3.5000000e+02   3.3825587e+00  -4.2231801e+00   1.2295738e+00
   2.1071957e+01  -2.3746467e+01   3.5000000e+02   3.4711960e+00  -4.1345852e+00   1.1823690e+00
   2.0977292e+01  -2.3841967e+01   3.5000000e+02   3.5429943e+00  -4.0474027e+00   1.0900093e+00
   2.0890172e+01  -2.3943350e+01   3.5000000e+02   3.5949804e+00  -3.9639339e+00   9.5524934e-01
   2.0811049e+01  -2.4050112e+01   3.5000000e+02   3.6244965e+00  -3.8858358e+00   7.8186638e-01
   2.0740335e+01  -2.4161722e+01   3.5000000e+02   3.6293044e+00  -3.8140958e+00   5.7442600e-01
   2.0678403e+01  -2.4277624e+01   3.5000000e+02   3.6076600e+00  -3.7490588e+00   3.3800914e-01
   2.0625589e+01  -2.4397238e+01   3.5000000e+02   3.5583671e+00  -3.6904888e+00   7.7939044e-02
   2.0582181e+01  -2.4519965e+01   3.5000000e+02   3.4808120e+00  -3.6376458e+00  -2.0045236e-01
   2.0548425e+01  -2.4645188e+01   3.5000000e+02   3.3749781e+00  -3.5893787e+00  -4.9203618e-01
   2.0524521e+01  -2.4772277e+01   3.5000000e+02   3.2414437e+00  -3.5442112e+00  -7.9203301e-01
   2.0510619e+01  -2.4900589e+01   3.5000000e+02   3.0813675e+00  -3.5004197e+00  -1.0960869e+00
   2.0506821e+01  -2.5029474e+01   3.5000000e+02   2.8964451e+00  -3.4560986e+00  -1.4003169e+00
   2.0513178e+01  -2.5158276e+01   3.5000000e+02   2.6888511e+00  -3.4092132e+00  -1.7013020e+00
   2.0529689e+01  -2.5286339e+01   3.5000000e+02   2.4611488e+00  -3.3576421e+00  -1.9960511e+00
   2.0556303e+01  -2.5413007e+01   3.5000000e+02   2.2161916e+00  -3.2992182e+00  -2.2819455e+00
   2.0592913e+01  -2.5537629e+01   3.5000000e+02   1.9570096e+00  -3.2317710e+00  -2.5566621e+00
   2.0639364e+01  -2.5659565e+01   3.5000000e+02   1.6866924e+00  -3.1531764e+00  -2.8181207e+00
   2.0695445e+01  -2.5778184e+01   3.5000000e+02   1.4083122e+00  -3.0614273e+00  -3.0643878e+00
   2.0760893e+01  -2.5892871e+01   3.5000000e+02   1.1248504e+00  -2.9547129e+00  -3.2936294e+00
   2.0835398e+01  -2.6003030e+01   3.5000000e+02   8.3915925e-01  -2.8315084e+00  -3.5040761e+00
   2.0918594e+01  -2.6108086e+01   3.5000000e+02   5.5395768e-01  -2.6906785e+00  -3.6939861e+00
   2.1010072e+01  -2.6207491e+01   3.5000000e+02   2.7181704e-01  -2.5315579e+00  -3.8616778e+00
   2.1109371e+01  -2.6300723e+01   3.5000000e+02  -4.8245770e-03  -2.3540357e+00  -4.0055466e+00
   2.1215991e+01  -2.6387291e+01   3.5000000e+02  -2.7368775e-01  -2.1585935e+00  -4.1241423e+00
   2.1329383e+01  -2.6466740e+01   3.5000000e+02  -5.3267644e-01  -1.9463375e+00  -4.2162248e+00
   2.1448965e+01  -2.6538649e+01   3.5000000e+02  -7.7992109e-01  -1.7189819e+00  -4.2808629e+00
   2.1574114e+01  -2.6602638e+01   3.5000000e+02  -1.0138279e+00  -1.4788277e+00  -4.3175055e+00
   2.1704176e+01  -2.6658366e+01   3.5000000e+02  -1.2331180e+00  -1.2287071e+00  -4.3260754e+00
   2.1838468e+01  -2.6705539e+01   3.5000000e+02  -1.4368645e+00  -9.7190788e-01  -4.3070419e+00
   2.1976280e+01  -2.6743904e+01   3.5000000e+02  -1.6244791e+00  -7.1209166e-01  -4.2614984e+00
   2.2116882e+01  -2.6773258e+01   3.5000000e+02  -1.7957067e+00  -4.5316598e-01  -4.1912091e+00
   2.2259526e+01  -2.6793443e+01   3.5000000e+02  -1.9505677e+00  -1.9915428e-01  -4.0986405e+00
   2.2403453e+01  -2.6804352e+01   3.5000000e+02  -2.0893090e+00   4.5973469e-02  -3.9869372e+00
   2.2547895e+01  -2.6805927e+01   3.5000000e+02  -2.2123314e+00   2.7846563e-01  -3.8598618e+00
   2.2692082e+01  -2.6798159e+01   3.5000000e+02  -2.3201284e+00   4.9495987e-01  -3.7216762e+00
   2.2835244e+01  -2.6781090e+01   3.5000000e+02  -2.4132350e+00   6.9262557e-01  -3.5769778e+00
   2.2976618e+01  -2.6754810e+01   3.5000000e+02  -2.4921893e+00   8.6926901e-01  -3.4305081e+00
   2.3115452e+01  -2.6719461e+01   3.5000000e+02  -2.5575164e+00   1.0233869e+00  -3.2869412e+00
   2.3251011e+01  -2.6675231e+01   3.5000000e+02  -2.6097132e+00   1.1541557e+00  -3.1507005e+00
   2.3382576e+01  -2.6622354e+01   3.5000000e+02  -2.6492425e+00   1.2613666e+00  -3.0258089e+00
   2.3509455e+01  -2.6561113e+01   3.5000000e+02  -2.6765382e+00   1.3453380e+00  -2.9157547e+00
   2.3630984e+01  -2.6491832e+01   3.5000000e+02  -2.6919849e+00   1.4067839e+00  -2.8234405e+00
   2.3746529e+01  -2.6414879e+01   3.5000000e+02  -2.6959025e+00   1.4466895e+00  -2.7511464e+00
   2.3855494e+01  -2.6330661e+01   3.5000000e+02  -2.6885192e+00   1.4661918e+00  -2.7005227e+00
   2.3957318e+01  -2.6239621e+01   3.5000000e+02  -2.6699341e+00   1.4664697e+00  -2.6726126e+00
   2.4051485e+01  -2.6142240e+01   3.5000000e+02  -2.6400996e+00   1.4486668e+00  -2.6678409e+00
   2.4137520e+01  -2.6039027e+01   3.5000000e+02  -2.5987897e+00   1.4138129e+00  -2.6860498e+00
   2.4214996e+01  -2.5930524e+01   3.5000000e+02  -2.5456122e+00   1.3627837e+00  -2.7264798e+00
   2.4283534e+01  -2.5817298e+01   3.5000000e+02  -2.4800240e+00   1.2962581e+00  -2.7877872e+00
   2.4342803e+01  -2.5699936e+01   3.5000000e+02  -2.4013748e+00   1.2146938e+00  -2.8680584e+00
   2.4392524e+01  -2.5579048e+01   3.5000000e+02  -2.3089863e+00   1.1183271e+00  -2.9648125e+00
   2.4432471e+01  -2.5455260e+01   3.5000000e+02  -2.2022355e+00   1.0071798e+00  -3.0750408e+00
   2.4462467e+01  -2.5329209e+01   3.5000000e+02  -2.0806428e+00   8.8108428e-01  -3.1952653e+00
   2.4482391e+01  -2.5201543e+01   3.5000000e+02  -1.9439763e+00   7.3974472e-01  -3.3215854e+00
   2.4492172e+01  -2.5072917e+01   3.5000000e+02  -1.7923261e+00   5.8280810e-01  -3.4497671e+00
   2.4491793e+01  -2.4943986e+01   3.5000000e+02  -1.6261677e+00   4.0995792e-01  -3.5753291e+00
   2.4481286e+01  -2.4815408e+01   3.5000000e+02  -1.4464035e+00   2.2102652e-01  -3.6936424e+00
   2.4460738e+01  -2.4687835e+01   3.5000000e+02  -1.2543773e+00   1.6103417e-02  -3.8000398e+00
   2.4430282e+01  -2.4561912e+01   3.5000000e+02  -1.0518531e+00  -2.0437020e-01  -3.8899501e+00
   2.4390102e+01  -2.4438274e+01   3.5000000e+02  -8.4098226e-01  -4.3951961e-01  -3.9590300e+00
   2.4340427e+01  -2.4317543e+01   3.5000000e+02  -6.2422871e-01  -6.8799915e-01  -4.0033209e+00
   2.4281532e+01  -2.4200325e+01   3.5000000e+02  -4.0427874e-01  -9.4798701e-01  -4.0193986e+00
   2.4213738e+01  -2.4087206e+01   3.5000000e+02  -1.8392609e-01  -1.2172217e+00  -4.0045162e+00
   2.4137403e+01  -2.3978750e+01   3.5000000e+02   3.4068579e-02  -1.4930819e+00  -3.9567230e+00
   2.4052930e+01  -2.3875497e+01   3.5000000e+02   2.4709935e-01  -1.7726690e+00  -3.8749393e+00
   2.3960755e+01  -2.3777959e+01   3.5000000e+02   4.5286252e-01  -2.0529327e+00  -3.7589855e+00
   2.3861352e+01  -2.3686621e+01   3.5000000e+02   6.4945952e-01  -2.3307652e+00  -3.6095622e+00
   2.3755225e+01  -2.3601934e+01   3.5000000e+02   8.3550020e-01  -2.6031166e+00  -3.4281751e+00
   2.3642911e+01  -2.3524316e+01   3.5000000e+02   1.0101539e+00  -2.8670614e+00  -3.2170363e+00
   2.3524973e+01  -2.3454149e+01   3.5000000e+02   1.1731835e+00  -3.1198626e+00  -2.9789344e+00
   2.3401998e+01  -2.3391780e+01   3.5000000e+02   1.3249354e+00  -3.3589982e+00  -2.7171101e+00
   2.3274596e+01  -2.3337513e+01   3.5000000e+02   1.4662943e+00  -3.5821768e+00  -2.4351308e+00
   2.3143399e+01  -2.3291616e+01   3.5000000e+02   1.5986041e+00  -3.7873214e+00  -2.1368158e+00
   2.3009050e+01  -2.3254314e+01   3.5000000e+02   1.7235697e+00  -3.9725782e+00  -1.8261550e+00
   2.2872211e+01  -2.3225789e+01   3.5000000e+02   1.8431154e+00  -4.1363009e+00  -1.5073039e+00
   2.2733552e+01  -2.3206182e+01   3.5000000e+02   1.9592486e+00  -4.2770720e+00  -1.1845809e+00
   2.2593752e+01  -2.3195587e+01   3.5000000e+02   2.0739025e+00  -4.3937417e+00  -8.6248985e-01
   2.2453493e+01  -2.3194058e+01   3.5000000e+02   2.1887957e+00  -4.4854861e+00  -5.4575607e-01
   2.1717233e+01  -2.3201844e+01   3.5000000e+02   2.7109395e+00  -4.6454594e+00   1.2008118e+00
   2.1589456e+01  -2.3252610e+01   3.5000000e+02   2.8373279e+00  -4.5899203e+00   1.3883630e+00
   2.1465502e+01  -2.3310923e+01   3.5000000e+02   2.9639672e+00  -4.5197215e+00   1.5382447e+00
   2.1345895e+01  -2.3376537e+01   3.5000000e+02   3.0885858e+00  -4.4381706e+00   1.6471451e+00
   2.1231146e+01  -2.3449175e+01   3.5000000e+02   3.2085593e+00  -4.3487487e+00   1.7126435e+00
   2.1121746e+01  -2.3528533e+01   3.5000000e+02   3.3210204e+00  -4.2549157e+00   1.7333621e+00
   2.1018166e+01  -2.3614274e+01   3.5000000e+02   3.4229683e+00  -4.1599287e+00   1.7090708e+00
   2.0920855e+01  -2.3706036e+01   3.5000000e+02   3.5113947e+00  -4.0666770e+00   1.6406875e+00
   2.0830238e+01  -2.3803431e+01   3.5000000e+02   3.5833986e+00  -3.9775584e+00   1.5302321e+00
   2.0746715e+01  -2.3906044e+01   3.5000000e+02   3.6362923e+00  -3.8944022e+00   1.3807124e+00
   2.0670657e+01  -2.4013440e+01   3.5000000e+02   3.6676954e+00  -3.8184322e+00   1.1959351e+00
   2.0602407e+01  -2.4125160e+01   3.5000000e+02   3.6756057e+00  -3.7502794e+00   9.8030389e-01
   2.0542276e+01  -2.4240728e+01   3.5000000e+02   3.6584562e+00  -3.6900199e+00   7.3857709e-01
   2.0490546e+01  -2.4359647e+01   3.5000000e+02   3.6151526e+00  -3.6372440e+00   4.7565218e-01
   2.0447460e+01  -2.4481407e+01   3.5000000e+02   3.5450998e+00  -3.5911262e+00   1.9636512e-01
   2.0413229e+01  -2.4605485e+01   3.5000000e+02   3.4482121e+00  -3.5505102e+00  -9.4679432e-02
   2.0388028e+01  -2.4731343e+01   3.5000000e+02   3.3249221e+00  -3.5139822e+00  -3.9320351e-01
   2.0371993e+01  -2.4858436e+01   3.5000000e+02   3.1761679e+00  -3.4799347e+00  -6.9533584e-01
   2.0365222e+01  -2.4986213e+01   3.5000000e+02   3.0033683e+00  -3.4466198e+00  -9.9763757e-01
   2.0367773e+01  -2.5114117e+01   3.5000000e+02   2.8083833e+00  -3.4121908e+00  -1.2970881e+00
   2.0379663e+01  -2.5241588e+01   3.5000000e+02   2.5934484e+00  -3.3747329e+00  -1.5910581e+00
   2.0400871e+01  -2.5368068e+01   3.5000000e+02   2.3610853e+00  -3.3322876e+00  -1.8772788e+00
   2.0431332e+01  -2.5492999e+01   3.5000000e+02   2.1140110e+00  -3.2828771e+00  -2.1537656e+00
   2.0470940e+01  -2.5615832e+01   3.5000000e+02   1.8550240e+00  -3.2245307e+00  -2.4187762e+00
   2.0519549e+01  -2.5736021e+01   3.5000000e+02   1.5869262e+00  -3.1553256e+00  -2.6707336e+00
   2.0576970e+01  -2.5853033e+01   3.5000000e+02   1.3124376e+00  -3.0734349e+00  -2.9081688e+00
   2.0642973e+01  -2.5966347e+01   3.5000000e+02   1.0341570e+00  -2.9771941e+00  -3.1296641e+00
   2.0717289e+01  -2.6075456e+01   3.5000000e+02   7.5454476e-01  -2.8651748e+00  -3.3338147e+00
   2.0799606e+01  -2.6179872e+01   3.5000000e+02   4.7592378e-01  -2.7362660e+00  -3.5192015e+00
   2.0889578e+01  -2.6279124e+01   3.5000000e+02   2.0049814e-01  -2.5897465e+00  -3.6844053e+00
   2.0986819e+01  -2.6372765e+01   3.5000000e+02  -6.9641161e-02  -2.4253494e+00  -3.8280209e+00
   2.1090905e+01  -2.6460372e+01   3.5000000e+02  -3.3251221e-01  -2.2433091e+00  -3.9487020e+00
   2.1201383e+01  -2.6541549e+01   3.5000000e+02  -5.8626829e-01  -2.0443753e+00  -4.0452287e+00
   2.1317763e+01  -2.6615925e+01   3.5000000e+02  -8.2921801e-01  -1.8298303e+00  -4.1165621e+00
   2.1439528e+01  -2.6683162e+01   3.5000000e+02  -1.0598901e+00  -1.6014599e+00  -4.1619225e+00
   2.1566131e+01  -2.6742955e+01   3.5000000e+02  -1.2770716e+00  -1.3615322e+00  -4.1808569e+00
   2.1697003e+01  -2.6795028e+01   3.5000000e+02  -1.4798389e+00  -1.1127529e+00  -4.1733239e+00
   2.1831550e+01  -2.6839145e+01   3.5000000e+02  -1.6675905e+00  -8.5820923e-01  -4.1397555e+00
   2.1969161e+01  -2.6875102e+01   3.5000000e+02  -1.8400305e+00  -6.0129707e-01  -4.0811385e+00
   2.2109206e+01  -2.6902734e+01   3.5000000e+02  -1.9971499e+00  -3.4562914e-01  -3.9990635e+00
   2.2251046e+01  -2.6921915e+01   3.5000000e+02  -2.1391849e+00  -9.4906847e-02  -3.8957559e+00
   2.2394029e+01  -2.6932557e+01   3.5000000e+02  -2.2665509e+00   1.4720502e-01  -3.7740758e+00
   2.2537499e+01  -2.6934610e+01   3.5000000e+02  -2.3797844e+00   3.7723919e-01  -3.6374692e+00
   2.2680797e+01  -2.6928065e+01   3.5000000e+02  -2.4794859e+00   5.9207616e-01  -3.4898665e+00
   2.2823264e+01  -2.6912952e+01   3.5000000e+02  -2.5662679e+00   7.8907676e-01  -3.3355463e+00
   2.2964246e+01  -2.6889341e+01   3.5000000e+02  -2.6407229e+00   9.6618683e-01  -3.1789581e+00
   2.3103099e+01  -2.6857339e+01   3.5000000e+02  -2.7034024e+00   1.1219917e+00  -3.0245381e+00
   2.3239186e+01  -2.6817095e+01   3.5000000e+02  -2.7548116e+00   1.2557148e+00  -2.8765287e+00
   2.3371887e+01  -2.6768793e+01   3.5000000e+02  -2.7954092e+00   1.3671755e+00  -2.7388278e+00
   2.3500601e+01  -2.6712653e+01   3.5000000e+02  -2.8256120e+00   1.4567030e+00  -2.6148721e+00
   2.3624745e+01  -2.6648934e+01   3.5000000e+02  -2.8457971e+00   1.5250249e+00  -2.5075653e+00
   2.3743763e+01  -2.6577925e+01   3.5000000e+02  -2.8562908e+00   1.5731493e+00  -2.4192521e+00
   2.3857121e+01  -2.6499951e+01   3.5000000e+02  -2.8573560e+00   1.6022490e+00  -2.3517171e+00
   2.3964317e+01  -2.6415367e+01   3.5000000e+02  -2.8491692e+00   1.6135636e+00  -2.3061968e+00
   2.4064881e+01  -2.6324555e+01   3.5000000e+02  -2.8317916e+00   1.6083132e+00  -2.2834112e+00
   2.4158373e+01  -2.6227927e+01   3.5000000e+02  -2.8051455e+00   1.5876347e+00  -2.2835839e+00
   2.4244391e+01  -2.6125919e+01   3.5000000e+02  -2.7689973e+00   1.5525338e+00  -2.3064552e+00
   2.4322568e+01  -2.6018991e+01   3.5000000e+02  -2.7229522e+00   1.5038482e+00  -2.3512964e+00
   2.4392575e+01  -2.5907622e+01   3.5000000e+02  -2.6664667e+00   1.4422214e+00  -2.4169190e+00
   2.4454124e+01  -2.5792311e+01   3.5000000e+02  -2.5988863e+00   1.3680901e+00  -2.5016717e+00
   2.4506966e+01  -2.5673573e+01   3.5000000e+02  -2.5194947e+00   1.2816740e+00  -2.6034626e+00
   2.4550892e+01  -2.5551935e+01   3.5000000e+02  -2.4275793e+00   1.1829774e+00  -2.7197818e+00
   2.4585736e+01  -2.5427937e+01   3.5000000e+02  -2.3225130e+00   1.0718104e+00  -2.8477234e+00
   2.4611372e+01  -2.5302127e+01   3.5000000e+02  -2.2038266e+00   9.4781632e-01  -2.9840371e+00
   2.4627716e+01  -2.5175060e+01   3.5000000e+02  -2.0712839e+00   8.1052450e-01  -3.1251723e+00
   2.4634725e+01  -2.5047293e+01   3.5000000e+02  -1.9249373e+00   6.5941483e-01  -3.2673381e+00
   2.4632399e+01  -2.4919386e+01   3.5000000e+02  -1.7651795e+00   4.9400710e-01  -3.4065562e+00
   2.4620777e+01  -2.4791896e+01   3.5000000e+02  -1.5927631e+00   3.1394793e-01  -3.5387368e+00
   2.4599937e+01  -2.4665380e+01   3.5000000e+02  -1.4088177e+00   1.1911327e-01  -3.6597482e+00
   2.4569998e+01  -2.4540385e+01   3.5000000e+02  -1.2148369e+00  -9.0312548e-02  -3.7655080e+00
   2.4531116e+01  -2.4417453e+01   3.5000000e+02  -1.0126571e+00  -3.1376087e-01  -3.8520859e+00
   2.4483484e+01  -2.4297112e+01   3.5000000e+02  -8.0440556e-01  -5.5024601e-01  -3.9158249e+00
   2.4427330e+01  -2.4179882e+01   3.5000000e+02  -5.9244217e-01  -7.9834449e-01  -3.9534663e+00
   2.4362920e+01  -2.4066264e+01   3.5000000e+02  -3.7926899e-01  -1.0562272e+00  -3.9622765e+00
   2.4290548e+01  -2.3956746e+01   3.5000000e+02  -1.6742443e-01  -1.3217113e+00  -3.9401627e+00
   2.4210544e+01  -2.3851793e+01   3.5000000e+02   4.0623980e-02  -1.5923389e+00  -3.8857510e+00
   2.4123266e+01  -2.3751854e+01   3.5000000e+02   2.4259414e-01  -1.8654632e+00  -3.7984384e+00
   2.4029099e+01  -2.3657353e+01   3.5000000e+02   4.3650186e-01  -2.1383553e+00  -3.6783909e+00
   2.3928457e+01  -2.3568691e+01   3.5000000e+02   6.2074411e-01  -2.4082846e+00  -3.5265069e+00
   2.3821778e+01  -2.3486242e+01   3.5000000e+02   7.9417634e-01  -2.6726047e+00  -3.3443388e+00
   2.3709522e+01  -2.3410356e+01   3.5000000e+02   9.5615772e-01  -2.9288061e+00  -3.1339954e+00
   2.3592172e+01  -2.3341352e+01   3.5000000e+02   1.1065708e+00  -3.1745566e+00  -2.8980233e+00
   2.3470229e+01  -2.3279522e+01   3.5000000e+02   1.2458177e+00  -3.4077136e+00  -2.6392975e+00
   2.3344211e+01  -2.3225124e+01   3.5000000e+02   1.3747854e+00  -3.6263262e+00  -2.3609126e+00
   2.3214650e+01  -2.3178389e+01   3.5000000e+02   1.4947866e+00  -3.8286108e+00  -2.0661168e+00
   2.3082095e+01  -2.3139511e+01   3.5000000e+02   1.6074692e+00  -4.0129353e+00  -1.7582613e+00
   2.2947102e+01  -2.3108655e+01   3.5000000e+02   1.7147217e+00  -4.1778054e+00  -1.4407885e+00
   2.2810237e+01  -2.3085949e+01   3.5000000e+02   1.8185474e+00  -4.3218666e+00  -1.1172444e+00
   2.2672075e+01  -2.3071488e+01   3.5000000e+02   1.9209392e+00  -4.4439216e+00  -7.9132746e-01
   2.2533193e+01  -2.3065334e+01   3.5000000e+02   2.0237606e+00  -4.5429828e+00  -4.6692732e-01
   2.2394173e+01  -2.3067512e+01   3.5000000e+02   2.1286209e+00  -4.6183420e+00  -1.4816987e-01
   2.2255595e+01  -2.3078012e+01   3.5000000e+02   2.2367767e+00  -4.6696611e+00   1.6056890e-01
   2.2118039e+01  -2.3096791e+01   3.5000000e+02   2.3490455e+00  -4.6970610e+00   4.5466348e-01
   2.1982081e+01  -2.3123771e+01   3.5000000e+02   2.4657418e+00  -4.7012097e+00   7.2930670e-01
   2.1848292e+01  -2.3158837e+01   3.5000000e+02   2.5866339e+00  -4.6833797e+00   9.7962182e-01
   2.1145197e+01  -2.3348129e+01   3.5000000e+02   3.1466072e+00  -4.3411168e+00   2.1944397e+00
   2.1034417e+01  -2.3428449e+01   3.5000000e+02   3.2673972e+00  -4.2374524e+00   2.2217948e+00
   2.0929208e+01  -2.3514920e+01   3.5000000e+02   3.3791531e+00  -4.1338139e+00   2.2041766e+00
   2.0829984e+01  -2.3607211e+01   3.5000000e+02   3.4788750e+00  -4.0331216e+00   2.1423787e+00
   2.0737135e+01  -2.3704970e+01   3.5000000e+02   3.5636487e+00  -3.9377978e+00   2.0382640e+00
   2.0651028e+01  -2.3807824e+01   3.5000000e+02   3.6307419e+00  -3.8496960e+00   1.8946536e+00
   2.0572011e+01  -2.3915378e+01   3.5000000e+02   3.6776879e+00  -3.7700778e+00   1.7151635e+00
   2.0500403e+01  -2.4027220e+01   3.5000000e+02   3.7023584e+00  -3.6996153e+00   1.5040129e+00
   2.0436500e+01  -2.4142920e+01   3.5000000e+02   3.7030136e+00  -3.6384389e+00   1.2658002e+00
   2.0380567e+01  -2.4262030e+01   3.5000000e+02   3.6783424e+00  -3.5861952e+00   1.0053063e+00
   2.0332845e+01  -2.4384091e+01   3.5000000e+02   3.6274866e+00  -3.5421270e+00   7.2726465e-01
   2.0293540e+01  -2.4508629e+01   3.5000000e+02   3.5500607e+00  -3.5051449e+00   4.3623842e-01
   2.0262832e+01  -2.4635160e+01   3.5000000e+02   3.4461606e+00  -3.4739078e+00   1.3647087e-01
   2.0240865e+01  -2.4763189e+01   3.5000000e+02   3.3163706e+00  -3.4468826e+00  -1.6816262e-01
   2.0227752e+01  -2.4892218e+01   3.5000000e+02   3.1617488e+00  -3.4224015e+00  -4.7421879e-01
   2.0223573e+01  -2.5021738e+01   3.5000000e+02   2.9838151e+00  -3.3987044e+00  -7.7866126e-01
   2.0228372e+01  -2.5151242e+01   3.5000000e+02   2.7844952e+00  -3.3739665e+00  -1.0788658e+00
   2.0242159e+01  -2.5280216e+01   3.5000000e+02   2.5660688e+00  -3.3463229e+00  -1.3725659e+00
   2.0264908e+01  -2.5408150e+01   3.5000000e+02   2.3310689e+00  -3.3138818e+00  -1.6578282e+00
   2.0296556e+01  -2.5534537e+01   3.5000000e+02   2.0821854e+00  -3.2747390e+00  -1.9329918e+00
   2.0337006e+01  -2.5658872e+01   3.5000000e+02   1.8221657e+00  -3.2269976e+00  -2.1966147e+00
   2.0386124e+01  -2.5780658e+01   3.5000000e+02   1.5537153e+00  -3.1687935e+00  -2.4474132e+00
   2.0443739e+01  -2.5899405e+01   3.5000000e+02   1.2794336e+00  -3.0983367e+00  -2.6841949e+00
   2.0509646e+01  -2.6014637e+01   3.5000000e+02   1.0017613e+00  -3.0139624e+00  -2.9058112e+00
   2.0583602e+01  -2.6125888e+01   3.5000000e+02   7.2298557e-01  -2.9142005e+00  -3.1110940e+00
   2.0665331e+01  -2.6232708e+01   3.5000000e+02   4.4524381e-01  -2.7978450e+00  -3.2988378e+00
   2.0754524e+01  -2.6334661e+01   3.5000000e+02   1.7055961e-01  -2.6640268e+00  -3.4677874e+00
   2.0850836e+01  -2.6431334e+01   3.5000000e+02  -9.9143923e-02  -2.5122744e+00  -3.6166460e+00
   2.0953892e+01  -2.6522331e+01   3.5000000e+02  -3.6201738e-01  -2.3425623e+00  -3.7441150e+00
   2.1063287e+01  -2.6607279e+01   3.5000000e+02  -6.1630120e-01  -2.1553367e+00  -3.8489401e+00
   2.1178586e+01  -2.6685829e+01   3.5000000e+02  -8.6035246e-01  -1.9515274e+00  -3.9299665e+00
   2.1299326e+01  -2.6757658e+01   3.5000000e+02  -1.0926915e+00  -1.7325419e+00  -3.9862020e+00
   2.1425020e+01  -2.6822469e+01   3.5000000e+02  -1.3120539e+00  -1.5002478e+00  -4.0168876e+00
   2.1555157e+01  -2.6879996e+01   3.5000000e+02  -1.5174443e+00  -1.2569471e+00  -4.0215639e+00
   2.1689206e+01  -2.6929998e+01   3.5000000e+02  -1.7081608e+00  -1.0053470e+00  -4.0001560e+00
   2.1826617e+01  -2.6972270e+01   3.5000000e+02  -1.8838260e+00  -7.4850730e-01  -3.9530405e+00
   2.1966823e+01  -2.7006635e+01   3.5000000e+02  -2.0443628e+00  -4.8978652e-01  -3.8811342e+00
   2.2109244e+01  -2.7032950e+01   3.5000000e+02  -2.1899731e+00  -2.3274863e-01  -3.7859528e+00
   2.2253289e+01  -2.7051107e+01   3.5000000e+02  -2.3210875e+00   1.8948324e-02  -3.6696514e+00
   2.2398361e+01  -2.7061029e+01   3.5000000e+02  -2.4382991e+00   2.6168876e-01  -3.5350350e+00
   2.2543856e+01  -2.7062675e+01   3.5000000e+02  -2.5423024e+00   4.9204996e-01  -3.3855114e+00
   2.2689169e+01  -2.7056037e+01   3.5000000e+02  -2.6338295e+00   7.0695947e-01  -3.2250017e+00
   2.2833694e+01  -2.7041145e+01   3.5000000e+02  -2.7136041e+00   9.0383387e-01  -3.0577935e+00
   2.2976832e+01  -2.7018060e+01   3.5000000e+02  -2.7823011e+00   1.0806868e+00  -2.8883718e+00
   2.3117987e+01  -2.6986877e+01   3.5000000e+02  -2.8405276e+00   1.2361802e+00  -2.7212297e+00
   2.3256577e+01  -2.6947727e+01   3.5000000e+02  -2.8888250e+00   1.3696414e+00  -2.5606639e+00
   2.3392029e+01  -2.6900773e+01   3.5000000e+02  -2.9276659e+00   1.4810040e+00  -2.4106335e+00
   2.3523785e+01  -2.6846208e+01   3.5000000e+02  -2.9574653e+00   1.5707230e+00  -2.2746373e+00
   2.3651306e+01  -2.6784261e+01   3.5000000e+02  -2.9785942e+00   1.6396669e+00  -2.1556224e+00
   2.3774074e+01  -2.6715185e+01   3.5000000e+02  -2.9913719e+00   1.6889849e+00  -2.0559788e+00
   2.3891591e+01  -2.6639268e+01   3.5000000e+02  -2.9960664e+00   1.7199932e+00  -1.9775248e+00
   2.4003384e+01  -2.6556821e+01   3.5000000e+02  -2.9928711e+00   1.7340662e+00  -1.9215520e+00
   2.4109009e+01  -2.6468184e+01   3.5000000e+02  -2.9818882e+00   1.7325559e+00  -1.8888414e+00
   2.4208047e+01  -2.6373721e+01   3.5000000e+02  -2.9630981e+00   1.7167224e+00  -1.8797190e+00
   2.4300111e+01  -2.6273816e+01   3.5000000e+02  -2.9363366e+00   1.6876880e+00  -1.8940782e+00
   2.4384844e+01  -2.6168879e+01   3.5000000e+02  -2.9012854e+00   1.6464079e+00  -1.9313898e+00
   2.4461924e+01  -2.6059335e+01   3.5000000e+02  -2.8574659e+00   1.5936440e+00  -1.9907255e+00
   2.4531059e+01  -2.5945630e+01   3.5000000e+02  -2.8042582e+00   1.5299530e+00  -2.0707621e+00
   2.4591995e+01  -2.5828222e+01   3.5000000e+02  -2.7409331e+00   1.4556755e+00  -2.1697892e+00
   2.4644510e+01  -2.5707585e+01   3.5000000e+02  -2.6667043e+00   1.3709348e+00  -2.2857244e+00
   2.4688422e+01  -2.5584204e+01   3.5000000e+02  -2.5807945e+00   1.2756415e+00  -2.4161250e+00
   2.4723581e+01  -2.5458573e+01   3.5000000e+02  -2.4824988e+00   1.1695041e+00  -2.5582333e+00
   2.4749874e+01  -2.5331192e+01   3.5000000e+02  -2.3712565e+00   1.0520565e+00  -2.7090036e+00
   2.4767226e+01  -2.5202570e+01   3.5000000e+02  -2.2467214e+00   9.2270551e-01  -2.8651330e+00
   2.4775596e+01  -2.5073216e+01   3.5000000e+02  -2.1088026e+00   7.8078177e-01  -3.0231194e+00
   2.4774981e+01  -2.4943641e+01   3.5000000e+02  -1.9577126e+00   6.2562045e-01  -3.1792897e+00
   2.4765409e+01  -2.4814356e+01   3.5000000e+02  -1.7939869e+00   4.5664439e-01  -3.3298528e+00
   2.4746948e+01  -2.4685869e+01   3.5000000e+02  -1.6185067e+00   2.7346074e-01  -3.4709360e+00
   2.4719697e+01  -2.4558683e+01   3.5000000e+02  -1.4324932e+00   7.5944070e-02  -3.5986582e+00
   2.4683788e+01  -2.4433295e+01   3.5000000e+02  -1.2375003e+00  -1.3568556e-01  -3.7092025e+00
   2.4639386e+01  -2.4310193e+01   3.5000000e+02  -1.0353900e+00  -3.6080964e-01  -3.7989143e+00
   2.4586688e+01  -2.4189855e+01   3.5000000e+02  -8.2828949e-01  -5.9838441e-01  -3.8644166e+00
   2.4525921e+01  -2.4072746e+01   3.5000000e+02  -6.1852593e-01  -8.4694961e-01  -3.9027350e+00
   2.4457340e+01  -2.3959319e+01   3.5000000e+02  -4.0854500e-01  -1.1046621e+00  -3.9114184e+00
   2.4381229e+01  -2.3850011e+01   3.5000000e+02  -2.0081362e-01  -1.3693598e+00  -3.8886414e+00
   2.4297899e+01  -2.3745241e+01   3.5000000e+02   2.2876139e-03  -1.6386447e+00  -3.8332772e+00
   2.4207686e+01  -2.3645412e+01   3.5000000e+02   1.9856886e-01  -1.9099698e+00  -3.7449329e+00
   2.4110948e+01  -2.3550906e+01   3.5000000e+02   3.8613501e-01  -2.1807404e+00  -3.6239382e+00
   2.4008069e+01  -2.3462082e+01   3.5000000e+02   5.6346206e-01  -2.4483916e+00  -3.4712965e+00
   2.3899452e+01  -2.3379281e+01   3.5000000e+02   7.2946738e-01  -2.7104574e+00  -3.2886073e+00
   2.3785519e+01  -2.3302816e+01   3.5000000e+02   8.8355599e-01  -2.9646321e+00  -3.0779518e+00
   2.3666711e+01  -2.3232978e+01   3.5000000e+02   1.0256373e+00  -3.2087856e+00  -2.8417856e+00
   2.3543485e+01  -2.3170032e+01   3.5000000e+02   1.1561261e+00  -3.4409756e+00  -2.5828211e+00
   2.3416313e+01  -2.3114217e+01   3.5000000e+02   1.2759153e+00  -3.6594320e+00  -2.3039299e+00
   2.3285681e+01  -2.3065743e+01   3.5000000e+02   1.3863237e+00  -3.8625316e+00  -2.0080676e+00
   2.3152084e+01  -2.3024795e+01   3.5000000e+02   1.4890267e+00  -4.0487655e+00  -1.6982329e+00
   2.3016028e+01  -2.2991526e+01   3.5000000e+02   1.5859571e+00  -4.2167146e+00  -1.3774570e+00
   2.2878028e+01  -2.2966062e+01   3.5000000e+02   1.6791996e+00  -4.3650329e+00  -1.0488370e+00
   2.2738605e+01  -2.2948500e+01   3.5000000e+02   1.7708759e+00  -4.4924621e+00  -7.1558089e-01
   2.2598284e+01  -2.2938904e+01   3.5000000e+02   1.8630240e+00  -4.5978722e+00  -3.8106399e-01
   2.2457593e+01  -2.2937313e+01   3.5000000e+02   1.9574929e+00  -4.6803208e+00  -4.8907337e-02
   2.2317061e+01  -2.2943731e+01   3.5000000e+02   2.0558321e+00  -4.7391499e+00   2.7699224e-01
   2.2177218e+01  -2.2958135e+01   3.5000000e+02   2.1592119e+00  -4.7740817e+00   5.9242503e-01
   2.2038590e+01  -2.2980470e+01   3.5000000e+02   2.2683513e+00  -4.7853263e+00   8.9290801e-01
   2.1901700e+01  -2.3010651e+01   3.5000000e+02   2.3834688e+00  -4.7736648e+00   1.1737456e+00
   2.1767065e+01  -2.3048566e+01   3.5000000e+02   2.5042583e+00  -4.7405004e+00   1.4301470e+00
   2.1635195e+01  -2.3094070e+01   3.5000000e+02   2.6298747e+00  -4.6878676e+00   1.6574011e+00
   2.1506590e+01  -2.3146993e+01   3.5000000e+02   2.7589597e+00  -4.6183782e+00   1.8510597e+00
   2.1381739e+01  -2.3207133e+01   3.5000000e+02   2.8896715e+00  -4.5351216e+00   2.0071635e+00
   2.1261121e+01  -2.3274263e+01   3.5000000e+02   3.0197520e+00  -4.4415139e+00   2.1224265e+00
   2.0628649e+01  -2.3624577e+01   3.5000000e+02   3.5339182e+00  -3.8612236e+00   2.5127388e+00
   2.0542963e+01  -2.3726459e+01   3.5000000e+02   3.6101645e+00  -3.7710388e+00   2.3722314e+00
   2.0463818e+01  -2.3832726e+01   3.5000000e+02   3.6679902e+00  -3.6902885e+00   2.1973022e+00
   2.0391495e+01  -2.3943022e+01   3.5000000e+02   3.7053396e+00  -3.6195655e+00   1.9918236e+00
   2.0326254e+01  -2.4056978e+01   3.5000000e+02   3.7204855e+00  -3.5589752e+00   1.7600118e+00
   2.0268331e+01  -2.4174209e+01   3.5000000e+02   3.7120607e+00  -3.5081912e+00   1.5062590e+00
   2.0217943e+01  -2.4294321e+01   3.5000000e+02   3.6790808e+00  -3.4665263e+00   1.2349324e+00
   2.0175281e+01  -2.4416908e+01   3.5000000e+02   3.6209611e+00  -3.4329950e+00   9.5025655e-01
   2.0140511e+01  -2.4541555e+01   3.5000000e+02   3.5375295e+00  -3.4063809e+00   6.5619595e-01
   2.0113776e+01  -2.4667837e+01   3.5000000e+02   3.4290378e+00  -3.3852971e+00   3.5638430e-01
   2.0095189e+01  -2.4795325e+01   3.5000000e+02   3.2961633e+00  -3.3682312e+00   5.4086858e-02
   2.0084841e+01  -2.4923582e+01   3.5000000e+02   3.1400082e+00  -3.3535908e+00  -2.4781201e-01
   2.0082791e+01  -2.5052169e+01   3.5000000e+02   2.9620750e+00  -3.3397277e+00  -5.4679173e-01
   2.0089074e+01  -2.5180644e+01   3.5000000e+02   2.7642295e+00  -3.3249633e+00  -8.4068453e-01
   2.0103693e+01  -2.5308563e+01   3.5000000e+02   2.5486407e+00  -3.3075982e+00  -1.1276295e+00
   2.0126625e+01  -2.5435483e+01   3.5000000e+02   2.3176969e+00  -3.2859230e+00  -1.4060558e+00
   2.0157816e+01  -2.5560964e+01   3.5000000e+02   2.0739111e+00  -3.2582224e+00  -1.6746333e+00
   2.0197183e+01  -2.5684569e+01   3.5000000e+02   1.8198264e+00  -3.2227848e+00  -1.9322299e+00
   2.0244615e+01  -2.5805866e+01   3.5000000e+02   1.5579276e+00  -3.1779180e+00  -2.1778640e+00
   2.0299970e+01  -2.5924428e+01   3.5000000e+02   1.2905791e+00  -3.1219747e+00  -2.4106407e+00
   2.0363078e+01  -2.6039840e+01   3.5000000e+02   1.0199745e+00  -3.0533889e+00  -2.6297081e+00
   2.0433738e+01  -2.6151694e+01   3.5000000e+02   7.4814381e-01  -2.9707284e+00  -2.8341922e+00
   2.0511723e+01  -2.6259594e+01   3.5000000e+02   4.7696187e-01  -2.8727512e+00  -3.0231718e+00
   2.0596777e+01  -2.6363157e+01   3.5000000e+02   2.0818535e-01  -2.7584666e+00  -3.1956490e+00
   2.0688616e+01  -2.6462014e+01   3.5000000e+02  -5.6508737e-02  -2.6271931e+00  -3.3505476e+00
   2.0786929e+01  -2.6555812e+01   3.5000000e+02  -3.1549578e-01  -2.4786041e+00  -3.4867310e+00
   2.0891382e+01  -2.6644216e+01   3.5000000e+02  -5.6719688e-01  -2.3127567e+00  -3.6030383e+00
   2.1001613e+01  -2.6726907e+01   3.5000000e+02  -8.1008062e-01  -2.1301158e+00  -3.6983180e+00
   2.1117239e+01  -2.6803589e+01   3.5000000e+02  -1.0427123e+00  -1.9315482e+00  -3.7714822e+00
   2.1237854e+01  -2.6873984e+01   3.5000000e+02  -1.2637877e+00  -1.7183248e+00  -3.8215576e+00
   2.1363032e+01  -2.6937839e+01   3.5000000e+02  -1.4721992e+00  -1.4921033e+00  -3.8477380e+00
   2.1492327e+01  -2.6994921e+01   3.5000000e+02  -1.6670731e+00  -1.2549214e+00  -3.8494510e+00
   2.1625278e+01  -2.7045024e+01   3.5000000e+02  -1.8478189e+00  -1.0091691e+00  -3.8264218e+00
   2.1761406e+01  -2.7087966e+01   3.5000000e+02  -2.0141372e+00  -7.5757288e-01  -3.7787508e+00
   2.1900221e+01  -2.7123590e+01   3.5000000e+02  -2.1660199e+00  -5.0314726e-01  -3.7069937e+00
   2.2041219e+01  -2.7151766e+01   3.5000000e+02  -2.3037246e+00  -2.4914087e-01  -3.6122331e+00
   2.2183888e+01  -2.7172392e+01   3.5000000e+02  -2.4277357e+00   1.0569550e-03  -3.4961353e+00
   2.2327710e+01  -2.7185392e+01   3.5000000e+02  -2.5387058e+00   2.4402687e-01  -3.3609835e+00
   2.2472160e+01  -2.7190719e+01   3.5000000e+02  -2.6373962e+00   4.7645063e-01  -3.2096658e+00
   2.2616712e+01  -2.7188354e+01   3.5000000e+02  -2.7246172e+00   6.9526156e-01  -3.0456183e+00
   2.2760838e+01  -2.7178304e+01   3.5000000e+02  -2.8011702e+00   8.9777947e-01  -2.8727287e+00
   2.2904013e+01  -2.7160607e+01   3.5000000e+02  -2.8678134e+00   1.0818386e+00  -2.6951774e+00
   2.3045716e+01  -2.7135328e+01   3.5000000e+02  -2.9252293e+00   1.2458667e+00  -2.5172729e+00
   2.3185431e+01  -2.7102558e+01   3.5000000e+02  -2.9740127e+00   1.3889196e+00  -2.3432736e+00
   2.3322653e+01  -2.7062417e+01   3.5000000e+02  -3.0146760e+00   1.5106745e+00  -2.1772034e+00
   2.3456885e+01  -2.7015051e+01   3.5000000e+02  -3.0476535e+00   1.6113628e+00  -2.0227240e+00
   2.3587643e+01  -2.6960633e+01   3.5000000e+02  -3.0733178e+00   1.6916813e+00  -1.8830260e+00
   2.3714460e+01  -2.6899360e+01   3.5000000e+02  -3.0919898e+00   1.7526785e+00  -1.7607725e+00
   2.3836884e+01  -2.6831455e+01   3.5000000e+02  -3.1039445e+00   1.7956346e+00  -1.6580857e+00
   2.3954480e+01  -2.6757162e+01   3.5000000e+02  -3.1094068e+00   1.8219493e+00  -1.5765719e+00
   2.4066835e+01  -2.6676751e+01   3.5000000e+02  -3.1085456e+00   1.8330521e+00  -1.5173366e+00
   2.4173557e+01  -2.6590510e+01   3.5000000e+02  -3.1014509e+00   1.8303219e+00  -1.4810498e+00
   2.4274276e+01  -2.6498750e+01   3.5000000e+02  -3.0881161e+00   1.8150346e+00  -1.4679753e+00
   2.4368646e+01  -2.6401800e+01   3.5000000e+02  -3.0684142e+00   1.7883238e+00  -1.4780132e+00
   2.4456347e+01  -2.6300007e+01   3.5000000e+02  -3.0420824e+00   1.7511568e+00  -1.5107199e+00
   2.4537086e+01  -2.6193732e+01   3.5000000e+02  -3.0087123e+00   1.7043184e+00  -1.5653298e+00
   2.4610595e+01  -2.6083355e+01   3.5000000e+02  -2.9677573e+00   1.6484053e+00  -1.6407576e+00
   2.4676637e+01  -2.5969265e+01   3.5000000e+02  -2.9185484e+00   1.5838175e+00  -1.7356118e+00
   2.4734999e+01  -2.5851867e+01   3.5000000e+02  -2.8603303e+00   1.5107603e+00  -1.8482015e+00
   2.4785500e+01  -2.5731573e+01   3.5000000e+02  -2.7923065e+00   1.4292409e+00  -1.9765494e+00
   2.4827988e+01  -2.5608807e+01   3.5000000e+02  -2.7136977e+00   1.3390775e+00  -2.1184053e+00
   2.4862338e+01  -2.5483997e+01   3.5000000e+02  -2.6237926e+00   1.2399044e+00  -2.2712874e+00
   2.4888458e+01  -2.5357578e+01   3.5000000e+02  -2.5220129e+00   1.1311964e+00  -2.4324921e+00
   2.4906283e+01  -2.5229992e+01   3.5000000e+02  -2.4079590e+00   1.0123019e+00  -2.5991322e+00
   2.4915777e+01  -2.5101678e+01   3.5000000e+02  -2.2814427e+00   8.8248037e-01  -2.7681739e+00
   2.4916933e+01  -2.4973082e+01   3.5000000e+02  -2.1425281e+00   7.4097317e-01  -2.9364413e+00
   2.4909775e+01  -2.4844645e+01   3.5000000e+02  -1.9915440e+00   5.8706520e-01  -3.1006505e+00
   2.4894352e+01  -2.4716810e+01   3.5000000e+02  -1.8291000e+00   4.2016999e-01  -3.2574289e+00
   2.4870742e+01  -2.4590012e+01   3.5000000e+02  -1.6560900e+00   2.3990103e-01  -3.4033494e+00
   2.4839050e+01  -2.4464685e+01   3.5000000e+02  -1.4737017e+00   4.6154333e-02  -3.5349699e+00
   2.4799409e+01  -2.4341255e+01   3.5000000e+02  -1.2834065e+00  -1.6083829e-01  -3.6489037e+00
   2.4751974e+01  -2.4220141e+01   3.5000000e+02  -1.0869367e+00  -3.8047273e-01  -3.7419104e+00
   2.4696929e+01  -2.4101753e+01   3.5000000e+02  -8.8626021e-01  -6.1175380e-01  -3.8109929e+00
   2.4634479e+01  -2.3986490e+01   3.5000000e+02  -6.8351773e-01  -8.5331663e-01  -3.8535164e+00
   2.4564853e+01  -2.3874741e+01   3.5000000e+02  -4.8095935e-01  -1.1034586e+00  -3.8673124e+00
   2.4488303e+01  -2.3766879e+01   3.5000000e+02  -2.8085609e-01  -1.3602059e+00  -3.8507695e+00
   2.4405102e+01  -2.3663268e+01   3.5000000e+02  -8.5414370e-02  -1.6213766e+00  -3.8028981e+00
   2.4315542e+01  -2.3564252e+01   3.5000000e+02   1.0332538e-01  -1.8846783e+00  -3.7233549e+00
   2.4219935e+01  -2.3470163e+01   3.5000000e+02   2.8356369e-01  -2.1477735e+00  -3.6124379e+00
   2.4118612e+01  -2.3381312e+01   3.5000000e+02   4.5382120e-01  -2.4083664e+00  -3.4710377e+00
   2.4011919e+01  -2.3297997e+01   3.5000000e+02   6.1299716e-01  -2.6642558e+00  -3.3005705e+00
   2.3900219e+01  -2.3220492e+01   3.5000000e+02   7.6041309e-01  -2.9133906e+00  -3.1028760e+00
   2.3783890e+01  -2.3149056e+01   3.5000000e+02   8.9583711e-01  -3.1538839e+00  -2.8801219e+00
   2.3663323e+01  -2.3083923e+01   3.5000000e+02   1.0194948e+00  -3.3840301e+00  -2.6346866e+00
   2.3538921e+01  -2.3025309e+01   3.5000000e+02   1.1320568e+00  -3.6022814e+00  -2.3690722e+00
   2.3411099e+01  -2.2973408e+01   3.5000000e+02   1.2346070e+00  -3.8072214e+00  -2.0858266e+00
   2.3280279e+01  -2.2928390e+01   3.5000000e+02   1.3285943e+00  -3.9975329e+00  -1.7874867e+00
   2.3146896e+01  -2.2890403e+01   3.5000000e+02   1.4157569e+00  -4.1719492e+00  -1.4765767e+00
   2.3011388e+01  -2.2859574e+01   3.5000000e+02   1.4980475e+00  -4.3292348e+00  -1.1556107e+00
   2.2874203e+01  -2.2836002e+01   3.5000000e+02   1.5775265e+00  -4.4681703e+00  -8.2714030e-01
   2.2735790e+01  -2.2819766e+01   3.5000000e+02   1.6562744e+00  -4.5875663e+00  -4.9381500e-01
   2.2596604e+01  -2.2810919e+01   3.5000000e+02   1.7362837e+00  -4.6863010e+00  -1.5845817e-01
   2.2457102e+01  -2.2809489e+01   3.5000000e+02   1.8193682e+00  -4.7633886e+00   1.7586725e-01
   2.2317740e+01  -2.2815482e+01   3.5000000e+02   1.9070834e+00  -4.8180661e+00   5.0580411e-01
   2.2178975e+01  -2.2828878e+01   3.5000000e+02   2.0006488e+00  -4.8498952e+00   8.2767282e-01
   2.2041264e+01  -2.2849633e+01   3.5000000e+02   2.1008926e+00  -4.8588653e+00   1.1374764e+00
   2.1905057e+01  -2.2877679e+01   3.5000000e+02   2.2082113e+00  -4.8454835e+00   1.4309668e+00
   2.1770803e+01  -2.2912923e+01   3.5000000e+02   2.3225370e+00  -4.8108366e+00   1.7037235e+00
   2.1638945e+01  -2.2955249e+01   3.5000000e+02   2.4433303e+00  -4.7566130e+00   1.9512944e+00
   2.1509917e+01  -2.3004519e+01   3.5000000e+02   2.5695873e+00  -4.6850756e+00   2.1693630e+00
   2.1384148e+01  -2.3060570e+01   3.5000000e+02   2.6998550e+00  -4.5989898e+00   2.3539247e+00
   2.1262056e+01  -2.3123216e+01   3.5000000e+02   2.8322757e+00  -4.5015011e+00   2.5014811e+00
   2.1144048e+01  -2.3192253e+01   3.5000000e+02   2.9646485e+00  -4.3959817e+00   2.6091967e+00
   2.1030521e+01  -2.3267450e+01   3.5000000e+02   3.0944868e+00  -4.2858663e+00   2.6750609e+00
   2.0921856e+01  -2.3348559e+01   3.5000000e+02   3.2191146e+00  -4.1744758e+00   2.6979809e+00
   2.0818423e+01  -2.3435312e+01   3.5000000e+02   3.3357488e+00  -4.0648706e+00   2.6778335e+00
   2.0720575e+01  -2.3527420e+01   3.5000000e+02   3.4415909e+00  -3.9597220e+00   2.6154867e+00
   2.0199822e+01  -2.4001405e+01   3.5000000e+02   3.7184064e+00  -3.4434242e+00   2.1812052e+00
   2.0141510e+01  -2.4118786e+01   3.5000000e+02   3.7192492e+00  -3.3956742e+00   1.9271920e+00
   2.0090327e+01  -2.4238925e+01   3.5000000e+02   3.6964523e+00  -3.3577748e+00   1.6564183e+00
   2.0046449e+01  -2.4361457e+01   3.5000000e+02   3.6493615e+00  -3.3287420e+00   1.3728628e+00
   2.0010028e+01  -2.4486012e+01   3.5000000e+02   3.5776898e+00  -3.3073861e+00   1.0802516e+00
   1.9981199e+01  -2.4612209e+01   3.5000000e+02   3.4815336e+00  -3.2923699e+00   7.8200237e-01
   1.9960072e+01  -2.4739664e+01   3.5000000e+02   3.3613794e+00  -3.2822475e+00   4.8118737e-01
   1.9946734e+01  -2.4867988e+01   3.5000000e+02   3.2181089e+00  -3.2755025e+00   1.8053087e-01
   1.9941251e+01  -2.4996785e+01   3.5000000e+02   3.0529961e+00  -3.2705785e+00  -1.1757930e-01
   1.9943665e+01  -2.5125660e+01   3.5000000e+02   2.8676746e+00  -3.2658971e+00  -4.1108527e-01
   1.9953993e+01  -2.5254214e+01   3.5000000e+02   2.6640995e+00  -3.2598715e+00  -6.9821969e-01
   1.9972227e+01  -2.5382048e+01   3.5000000e+02   2.4444771e+00  -3.2509131e+00  -9.7748892e-01
   1.9998337e+01  -2.5508767e+01   3.5000000e+02   2.2111734e+00  -3.2374357e+00  -1.2476574e+00
   2.0032267e+01  -2.5633974e+01   3.5000000e+02   1.9666324e+00  -3.2178549e+00  -1.5076946e+00
   2.0073934e+01  -2.5757277e+01   3.5000000e+02   1.7132739e+00  -3.1905919e+00  -1.7567460e+00
   2.0123232e+01  -2.5878290e+01   3.5000000e+02   1.4534114e+00  -3.1540840e+00  -1.9940934e+00
   2.0180029e+01  -2.5996631e+01   3.5000000e+02   1.1892032e+00  -3.1068044e+00  -2.2190918e+00
   2.0244169e+01  -2.6111927e+01   3.5000000e+02   9.2261761e-01  -3.0472923e+00  -2.4311224e+00
   2.0315471e+01  -2.6223812e+01   3.5000000e+02   6.5544332e-01  -2.9741969e+00  -2.6295355e+00
   2.0393729e+01  -2.6331930e+01   3.5000000e+02   3.8931565e-01  -2.8863275e+00  -2.8136111e+00
   2.0478713e+01  -2.6435937e+01   3.5000000e+02   1.2575888e-01  -2.7827073e+00  -2.9825346e+00
   2.0570170e+01  -2.6535500e+01   3.5000000e+02  -1.3376260e-01  -2.6626242e+00  -3.1353912e+00
   2.0667823e+01  -2.6630299e+01   3.5000000e+02  -3.8780836e-01  -2.5256733e+00  -3.2711746e+00
   2.0771375e+01  -2.6720030e+01   3.5000000e+02  -6.3495045e-01  -2.3717819e+00  -3.3888178e+00
   2.0880505e+01  -2.6804403e+01   3.5000000e+02  -8.7377087e-01  -2.2012306e+00  -3.4872206e+00
   2.0994874e+01  -2.6883145e+01   3.5000000e+02  -1.1028989e+00  -2.0146513e+00  -3.5652971e+00
   2.1114122e+01  -2.6956002e+01   3.5000000e+02  -1.3210573e+00  -1.8130265e+00  -3.6220104e+00
   2.1237872e+01  -2.7022735e+01   3.5000000e+02  -1.5271123e+00  -1.5976848e+00  -3.6564263e+00
   2.1365730e+01  -2.7083129e+01   3.5000000e+02  -1.7201416e+00  -1.3702898e+00  -3.6677535e+00
   2.1497286e+01  -2.7136986e+01   3.5000000e+02  -1.8994675e+00  -1.1328422e+00  -3.6554105e+00
   2.1632116e+01  -2.7184130e+01   3.5000000e+02  -2.0646940e+00  -8.8766807e-01  -3.6190902e+00
   2.1769783e+01  -2.7224407e+01   3.5000000e+02  -2.2157161e+00  -6.3740510e-01  -3.5588390e+00
   2.1909840e+01  -2.7257685e+01   3.5000000e+02  -2.3527102e+00  -3.8496871e-01  -3.4751400e+00
   2.2051831e+01  -2.7283854e+01   3.5000000e+02  -2.4761035e+00  -1.3349920e-01  -3.3689920e+00
   2.2195291e+01  -2.7302829e+01   3.5000000e+02  -2.5865325e+00   1.1371922e-01  -3.2419686e+00
   2.2339751e+01  -2.7314548e+01   3.5000000e+02  -2.6847852e+00   3.5337160e-01  -3.0962557e+00
   2.2484736e+01  -2.7318972e+01   3.5000000e+02  -2.7717389e+00   5.8223857e-01  -2.9346502e+00
   2.2629772e+01  -2.7316086e+01   3.5000000e+02  -2.8483045e+00   7.9734955e-01  -2.7605016e+00
   2.2774382e+01  -2.7305899e+01   3.5000000e+02  -2.9153697e+00   9.9611480e-01  -2.5776184e+00
   2.2918092e+01  -2.7288447e+01   3.5000000e+02  -2.9737622e+00   1.1764544e+00  -2.3901144e+00
   2.3060430e+01  -2.7263784e+01   3.5000000e+02  -3.0242145e+00   1.3368742e+00  -2.2022608e+00
   2.3200932e+01  -2.7231994e+01   3.5000000e+02  -3.0673619e+00   1.4765165e+00  -2.0182699e+00
   2.3339140e+01  -2.7193180e+01   3.5000000e+02  -3.1037339e+00   1.5951371e+00  -1.8421528e+00
   2.3474603e+01  -2.7147468e+01   3.5000000e+02  -3.1337677e+00   1.6930507e+00  -1.6775672e+00
   2.3606883e+01  -2.7095010e+01   3.5000000e+02  -3.1578264e+00   1.7710436e+00  -1.5276954e+00
   2.3735554e+01  -2.7035976e+01   3.5000000e+02  -3.1762096e+00   1.8302539e+00  -1.3952067e+00
   2.3860202e+01  -2.6970559e+01   3.5000000e+02  -3.1891672e+00   1.8720542e+00  -1.2822301e+00
   2.3980429e+01  -2.6898972e+01   3.5000000e+02  -3.1969039e+00   1.8979402e+00  -1.1903712e+00
   2.4095855e+01  -2.6821447e+01   3.5000000e+02  -3.1995757e+00   1.9094328e+00  -1.1207499e+00
   2.4206117e+01  -2.6738237e+01   3.5000000e+02  -3.1972796e+00   1.9080020e+00  -1.0740495e+00
   2.4310869e+01  -2.6649610e+01   3.5000000e+02  -3.1900338e+00   1.8950082e+00  -1.0505816e+00
   2.4409789e+01  -2.6555852e+01   3.5000000e+02  -3.1777619e+00   1.8716677e+00  -1.0503088e+00
   2.4502573e+01  -2.6457265e+01   3.5000000e+02  -3.1602711e+00   1.8390273e+00  -1.0728963e+00
   2.4588941e+01  -2.6354166e+01   3.5000000e+02  -3.1372401e+00   1.7979542e+00  -1.1177245e+00
   2.4668634e+01  -2.6246885e+01   3.5000000e+02  -3.1082109e+00   1.7491302e+00  -1.1839132e+00
   2.4741417e+01  -2.6135763e+01   3.5000000e+02  -3.0725948e+00   1.6930512e+00  -1.2703263e+00
   2.4807080e+01  -2.6021155e+01   3.5000000e+02  -3.0296943e+00   1.6300308e+00  -1.3755688e+00
   2.4865436e+01  -2.5903424e+01   3.5000000e+02  -2.9787306e+00   1.5602000e+00  -1.4980094e+00
   2.4916324e+01  -2.5782941e+01   3.5000000e+02  -2.9188882e+00   1.4835102e+00  -1.6357847e+00
   2.4959606e+01  -2.5660088e+01   3.5000000e+02  -2.8493656e+00   1.3997398e+00  -1.7868153e+00
   2.4995171e+01  -2.5535249e+01   3.5000000e+02  -2.7694237e+00   1.3084964e+00  -1.9488369e+00
   2.5022932e+01  -2.5408816e+01   3.5000000e+02  -2.6784375e+00   1.2092348e+00  -2.1194179e+00
   2.5042827e+01  -2.5281183e+01   3.5000000e+02  -2.5759339e+00   1.1012754e+00  -2.2959909e+00
   2.5054820e+01  -2.5152747e+01   3.5000000e+02  -2.4616261e+00   9.8383973e-01  -2.4758678e+00
   2.5058898e+01  -2.5023907e+01   3.5000000e+02  -2.3354340e+00   8.5609610e-01  -2.6562575e+00
   2.5055074e+01  -2.4895061e+01   3.5000000e+02  -2.1974997e+00   7.1721646e-01  -2.8342711e+00
   2.5043384e+01  -2.4766605e+01   3.5000000e+02  -2.0481966e+00   5.6644300e-01  -3.0069294e+00
   2.5023889e+01  -2.4638934e+01   3.5000000e+02  -1.8881426e+00   4.0316411e-01  -3.1711646e+00
   2.4996672e+01  -2.4512440e+01   3.5000000e+02  -1.7182059e+00   2.2698422e-01  -3.3238443e+00
   2.4961839e+01  -2.4387508e+01   3.5000000e+02  -1.5395096e+00   3.7784886e-02  -3.4618100e+00
   2.4919517e+01  -2.4264519e+01   3.5000000e+02  -1.3534346e+00  -1.6422139e-01  -3.5819347e+00
   2.4869858e+01  -2.4143846e+01   3.5000000e+02  -1.1616115e+00  -3.7846093e-01  -3.6812054e+00
   2.4813030e+01  -2.4025855e+01   3.5000000e+02  -9.6588530e-01  -6.0399599e-01  -3.7568298e+00
   2.4749225e+01  -2.3910902e+01   3.5000000e+02  -7.6827880e-01  -8.3953697e-01  -3.8063381e+00
   2.4678653e+01  -2.3799333e+01   3.5000000e+02  -5.7092450e-01  -1.0834847e+00  -3.8276904e+00
   2.4601542e+01  -2.3691484e+01   3.5000000e+02  -3.7599006e-01  -1.3339855e+00  -3.8193619e+00
   2.4518139e+01  -2.3587677e+01   3.5000000e+02  -1.8559507e-01  -1.5890035e+00  -3.7804016e+00
   2.4428707e+01  -2.3488223e+01   3.5000000e+02  -1.7279488e-03  -1.8463933e+00  -3.7104607e+00
   2.4333526e+01  -2.3393420e+01   3.5000000e+02   1.7383093e-01  -2.1039753e+00  -3.6097861e+00
   2.4232891e+01  -2.3303550e+01   3.5000000e+02   3.3958055e-01  -2.3596114e+00  -3.4791797e+00
   2.4127110e+01  -2.3218880e+01   3.5000000e+02   4.9435595e-01  -2.6112633e+00  -3.3199311e+00
   2.4016507e+01  -2.3139661e+01   3.5000000e+02   6.3736762e-01  -2.8570327e+00  -3.1337327e+00
   2.3901417e+01  -2.3066128e+01   3.5000000e+02   7.6823705e-01  -3.0951926e+00  -2.9225774e+00
   2.3782186e+01  -2.2998499e+01   3.5000000e+02   8.8701173e-01  -3.3241939e+00  -2.6886545e+00
   2.3659173e+01  -2.2936974e+01   3.5000000e+02   9.9416242e-01  -3.5426487e+00  -2.4342557e+00
   2.3532744e+01  -2.2881734e+01   3.5000000e+02   1.0905710e+00  -3.7493075e+00  -2.1616854e+00
   2.3403276e+01  -2.2832943e+01   3.5000000e+02   1.1774910e+00  -3.9430090e+00  -1.8732136e+00
   2.3271152e+01  -2.2790743e+01   3.5000000e+02   1.2564972e+00  -4.1226426e+00  -1.5710347e+00
   2.3136763e+01  -2.2755261e+01   3.5000000e+02   1.3294179e+00  -4.2870962e+00  -1.2572872e+00
   2.3000505e+01  -2.2726598e+01   3.5000000e+02   1.3982497e+00  -4.4352376e+00  -9.3406932e-01
   2.2862778e+01  -2.2704841e+01   3.5000000e+02   1.4650780e+00  -4.5658961e+00  -6.0351456e-01
   2.2723987e+01  -2.2690053e+01   3.5000000e+02   1.5319778e+00  -4.6778844e+00  -2.6785811e-01
   2.2584540e+01  -2.2682277e+01   3.5000000e+02   1.6009307e+00  -4.7700417e+00   7.0478364e-02
   2.2444845e+01  -2.2681537e+01   3.5000000e+02   1.6737453e+00  -4.8413058e+00   4.0881476e-01
   2.2305312e+01  -2.2687833e+01   3.5000000e+02   1.7519789e+00  -4.8908062e+00   7.4415522e-01
   2.2166349e+01  -2.2701149e+01   3.5000000e+02   1.8368872e+00  -4.9179674e+00   1.0731528e+00
   2.2028364e+01  -2.2721445e+01   3.5000000e+02   1.9293643e+00  -4.9226179e+00   1.3921191e+00
   2.1891764e+01  -2.2748660e+01   3.5000000e+02   2.0299086e+00  -4.9050842e+00   1.6970636e+00
   2.1756948e+01  -2.2782716e+01   3.5000000e+02   2.1386061e+00  -4.8662571e+00   1.9837880e+00
   2.1624315e+01  -2.2823512e+01   3.5000000e+02   2.2551045e+00  -4.8076257e+00   2.2479933e+00
   2.1494256e+01  -2.2870928e+01   3.5000000e+02   2.3786221e+00  -4.7312604e+00   2.4854413e+00
   2.1367156e+01  -2.2924823e+01   3.5000000e+02   2.5079562e+00  -4.6397526e+00   2.6921178e+00
   2.1243394e+01  -2.2985041e+01   3.5000000e+02   2.6415195e+00  -4.5361081e+00   2.8643895e+00
   2.1123337e+01  -2.3051401e+01   3.5000000e+02   2.7773678e+00  -4.4236088e+00   2.9991990e+00
   2.1007347e+01  -2.3123709e+01   3.5000000e+02   2.9132702e+00  -4.3056559e+00   3.0941628e+00
   2.0895771e+01  -2.3201751e+01   3.5000000e+02   3.0467667e+00  -4.1856034e+00   3.1477179e+00
   2.0788949e+01  -2.3285295e+01   3.5000000e+02   3.1752430e+00  -4.0666140e+00   3.1591716e+00
   2.0687205e+01  -2.3374093e+01   3.5000000e+02   3.2960146e+00  -3.9515230e+00   3.1287454e+00
   2.0590851e+01  -2.3467881e+01   3.5000000e+02   3.4064044e+00  -3.8427455e+00   3.0575517e+00
   2.0500185e+01  -2.3566380e+01   3.5000000e+02   3.5038197e+00  -3.7422132e+00   2.9475379e+00
   2.0415492e+01  -2.3669296e+01   3.5000000e+02   3.5858210e+00  -3.6513468e+00   2.8013878e+00
   2.0337036e+01  -2.3776322e+01   3.5000000e+02   3.6501817e+00  -3.5710507e+00   2.6224005e+00
   2.0265068e+01  -2.3887135e+01   3.5000000e+02   3.6949337e+00  -3.5017485e+00   2.4143312e+00
   1.9872619e+01  -2.4456908e+01   3.5000000e+02   3.5850647e+00  -3.1838376e+00   1.4339704e+00
   1.9843646e+01  -2.4582259e+01   3.5000000e+02   3.4970700e+00  -3.1755377e+00   1.1398212e+00
   1.9821870e+01  -2.4708814e+01   3.5000000e+02   3.3860189e+00  -3.1725236e+00   8.4360822e-01
   1.9807371e+01  -2.4836229e+01   3.5000000e+02   3.2526496e+00  -3.1733764e+00   5.4778692e-01
   1.9800211e+01  -2.4964157e+01   3.5000000e+02   3.0980577e+00  -3.1766488e+00   2.5451148e-01
   1.9800432e+01  -2.5092250e+01   3.5000000e+02   2.9236804e+00  -3.1808823e+00  -3.4347637e-02
   1.9808056e+01  -2.5220157e+01   3.5000000e+02   2.7312664e+00  -3.1846208e+00  -3.1717949e-01
   1.9823087e+01  -2.5347527e+01   3.5000000e+02   2.5228194e+00  -3.1864184e+00  -5.9262577e-01
   1.9845505e+01  -2.5474009e+01   3.5000000e+02   2.3005269e+00  -3.1848380e+00  -8.5954978e-01
   1.9875274e+01  -2.5599254e+01   3.5000000e+02   2.0666712e+00  -3.1784542e+00  -1.1170368e+00
   1.9912332e+01  -2.5722915e+01   3.5000000e+02   1.8235423e+00  -3.1658462e+00  -1.3643461e+00
   1.9956600e+01  -2.5844648e+01   3.5000000e+02   1.5733522e+00  -3.1456019e+00  -1.6008970e+00
   2.0007978e+01  -2.5964113e+01   3.5000000e+02   1.3181690e+00  -3.1163224e+00  -1.8262182e+00
   2.0066343e+01  -2.6080976e+01   3.5000000e+02   1.0598737e+00  -3.0766367e+00  -2.0398940e+00
   2.0131552e+01  -2.6194910e+01   3.5000000e+02   8.0014796e-01  -3.0252285e+00  -2.2415169e+00
   2.0203442e+01  -2.6305592e+01   3.5000000e+02   5.4049901e-01  -2.9608735e+00  -2.4306361e+00
   2.0281830e+01  -2.6412711e+01   3.5000000e+02   2.8228447e-01  -2.8824795e+00  -2.6067212e+00
   2.0366512e+01  -2.6515963e+01   3.5000000e+02   2.6777122e-02  -2.7891352e+00  -2.7691312e+00
   2.0457264e+01  -2.6615054e+01   3.5000000e+02  -2.2478740e-01  -2.6801525e+00  -2.9171105e+00
   2.0553845e+01  -2.6709702e+01   3.5000000e+02  -4.7117344e-01  -2.5550991e+00  -3.0498011e+00
   2.0655992e+01  -2.6799637e+01   3.5000000e+02  -7.1111896e-01  -2.4138257e+00  -3.1662536e+00
   2.0763428e+01  -2.6884600e+01   3.5000000e+02  -9.4333955e-01  -2.2564745e+00  -3.2654697e+00
   2.0875855e+01  -2.6964348e+01   3.5000000e+02  -1.1665578e+00  -2.0834837e+00  -3.3464195e+00
   2.0992960e+01  -2.7038650e+01   3.5000000e+02  -1.3795421e+00  -1.8955842e+00  -3.4080854e+00
   2.1114417e+01  -2.7107293e+01   3.5000000e+02  -1.5811728e+00  -1.6937888e+00  -3.4494910e+00
   2.1239880e+01  -2.7170077e+01   3.5000000e+02  -1.7704834e+00  -1.4794054e+00  -3.4697357e+00
   2.1368996e+01  -2.7226821e+01   3.5000000e+02  -1.9467292e+00  -1.2540210e+00  -3.4680443e+00
   2.1501393e+01  -2.7277360e+01   3.5000000e+02  -2.1094104e+00  -1.0195268e+00  -3.4438154e+00
   2.1636693e+01  -2.7321546e+01   3.5000000e+02  -2.2583037e+00  -7.7810533e-01  -3.3966975e+00
   2.1774505e+01  -2.7359252e+01   3.5000000e+02  -2.3934650e+00  -5.3223274e-01  -3.3266562e+00
   2.1914431e+01  -2.7390367e+01   3.5000000e+02  -2.5152106e+00  -2.8465295e-01  -3.2340687e+00
   2.2056064e+01  -2.7414799e+01   3.5000000e+02  -2.6240894e+00  -3.8333868e-02  -3.1197995e+00
   2.2198993e+01  -2.7432479e+01   3.5000000e+02  -2.7208442e+00   2.0361552e-01  -2.9852586e+00
   2.2342800e+01  -2.7443353e+01   3.5000000e+02  -2.8063482e+00   4.3803558e-01  -2.8324581e+00
   2.2487067e+01  -2.7447391e+01   3.5000000e+02  -2.8815596e+00   6.6185631e-01  -2.6639935e+00
   2.2631371e+01  -2.7444580e+01   3.5000000e+02  -2.9474543e+00   8.7222160e-01  -2.4830207e+00
   2.2775291e+01  -2.7434929e+01   3.5000000e+02  -3.0049832e+00   1.0666381e+00  -2.2931516e+00
   2.2918408e+01  -2.7418466e+01   3.5000000e+02  -3.0550268e+00   1.2430903e+00  -2.0983297e+00
   2.3060304e+01  -2.7395238e+01   3.5000000e+02  -3.0983670e+00   1.4001249e+00  -1.9026726e+00
   2.3200566e+01  -2.7365315e+01   3.5000000e+02  -3.1356750e+00   1.5368994e+00  -1.7102849e+00
   2.3338786e+01  -2.7328783e+01   3.5000000e+02  -3.1675061e+00   1.6531733e+00  -1.5251061e+00
   2.3474565e+01  -2.7285749e+01   3.5000000e+02  -3.1943112e+00   1.7492645e+00  -1.3507477e+00
   2.3607511e+01  -2.7236338e+01   3.5000000e+02  -3.2164494e+00   1.8259602e+00  -1.1903953e+00
   2.3737242e+01  -2.7180694e+01   3.5000000e+02  -3.2342071e+00   1.8844121e+00  -1.0467351e+00
   2.3863387e+01  -2.7118979e+01   3.5000000e+02  -3.2478124e+00   1.9260202e+00  -9.2192925e-01
   2.3985587e+01  -2.7051372e+01   3.5000000e+02  -3.2574464e+00   1.9523214e+00  -8.1762818e-01
   2.4103496e+01  -2.6978068e+01   3.5000000e+02  -3.2632470e+00   1.9648912e+00  -7.3500735e-01
   2.4216785e+01  -2.6899280e+01   3.5000000e+02  -3.2653073e+00   1.9652649e+00  -6.7480538e-01
   2.4325137e+01  -2.6815234e+01   3.5000000e+02  -3.2636629e+00   1.9548763e+00  -6.3740248e-01
   2.4428253e+01  -2.6726171e+01   3.5000000e+02  -3.2582795e+00   1.9350190e+00  -6.2285441e-01
   2.4525851e+01  -2.6632348e+01   3.5000000e+02  -3.2490359e+00   1.9068220e+00  -6.3093559e-01
   2.4617666e+01  -2.6534033e+01   3.5000000e+02  -3.2357061e+00   1.8712364e+00  -6.6118268e-01
   2.4703453e+01  -2.6431505e+01   3.5000000e+02  -3.2179470e+00   1.8290329e+00  -7.1290926e-01
   2.4782984e+01  -2.6325057e+01   3.5000000e+02  -3.1952935e+00   1.7808055e+00  -7.8521736e-01
   2.4856053e+01  -2.6214991e+01   3.5000000e+02  -3.1671622e+00   1.7269754e+00  -8.7700451e-01
   2.4922472e+01  -2.6101616e+01   3.5000000e+02  -3.1328640e+00   1.6677973e+00  -9.8697922e-01
   2.4982074e+01  -2.5985254e+01   3.5000000e+02  -3.0916356e+00   1.6033678e+00  -1.1136465e+00
   2.5034713e+01  -2.5866231e+01   3.5000000e+02  -3.0426713e+00   1.5336267e+00  -1.2553350e+00
   2.5080263e+01  -2.5744879e+01   3.5000000e+02  -2.9851672e+00   1.4583621e+00  -1.4102075e+00
   2.5118620e+01  -2.5621539e+01   3.5000000e+02  -2.9183693e+00   1.3772161e+00  -1.5762699e+00
   2.5149700e+01  -2.5496552e+01   3.5000000e+02  -2.8416093e+00   1.2896872e+00  -1.7514136e+00
   2.5173439e+01  -2.5370266e+01   3.5000000e+02  -2.7543456e+00   1.1951459e+00  -1.9334229e+00
   2.5189795e+01  -2.5243029e+01   3.5000000e+02  -2.6561862e+00   1.0928505e+00  -2.1200017e+00
   2.5198747e+01  -2.5115193e+01   3.5000000e+02  -2.5469093e+00   9.8197959e-01  -2.3087772e+00
   2.5200293e+01  -2.4987107e+01   3.5000000e+02  -2.4264659e+00   8.6166673e-01  -2.4973147e+00
   2.5194453e+01  -2.4859124e+01   3.5000000e+02  -2.2949952e+00   7.3105818e-01  -2.6830945e+00
   2.5181265e+01  -2.4731592e+01   3.5000000e+02  -2.1528192e+00   5.8936352e-01  -2.8635200e+00
   2.5160787e+01  -2.4604858e+01   3.5000000e+02  -2.0004569e+00   4.3592409e-01  -3.0359004e+00
   2.5133098e+01  -2.4479266e+01   3.5000000e+02  -1.8386372e+00   2.7027639e-01  -3.1974569e+00
   2.5098292e+01  -2.4355155e+01   3.5000000e+02  -1.6683033e+00   9.2205328e-02  -3.3453547e+00
   2.5056485e+01  -2.4232861e+01   3.5000000e+02  -1.4906341e+00  -9.8202221e-02  -3.4767396e+00
   2.5007809e+01  -2.4112712e+01   3.5000000e+02  -1.3070336e+00  -3.0053603e-01  -3.5888198e+00
   2.4952412e+01  -2.3995031e+01   3.5000000e+02  -1.1191218e+00  -5.1404777e-01  -3.6789517e+00
   2.4890461e+01  -2.3880133e+01   3.5000000e+02  -9.2870509e-01  -7.3766145e-01  -3.7447398e+00
   2.4822137e+01  -2.3768323e+01   3.5000000e+02  -7.3772137e-01  -9.7000925e-01  -3.7841377e+00
   2.4747639e+01  -2.3659901e+01   3.5000000e+02  -5.4818846e-01  -1.2094655e+00  -3.7955324e+00
   2.4667178e+01  -2.3555153e+01   3.5000000e+02  -3.6211826e-01  -1.4542234e+00  -3.7778119e+00
   2.4580981e+01  -2.3454357e+01   3.5000000e+02  -1.8145494e-01  -1.7023466e+00  -3.7304008e+00
   2.4489288e+01  -2.3357781e+01   3.5000000e+02  -7.9991824e-03  -1.9518426e+00  -3.6532701e+00
   2.4392353e+01  -2.3265678e+01   3.5000000e+02   1.5665637e-01  -2.2007335e+00  -3.5469137e+00
   2.4290440e+01  -2.3178292e+01   3.5000000e+02   3.1118316e-01  -2.4471107e+00  -3.4123027e+00
   2.4183827e+01  -2.3095853e+01   3.5000000e+02   4.5455963e-01  -2.6891840e+00  -3.2508159e+00
   2.4072800e+01  -2.3018576e+01   3.5000000e+02   5.8611343e-01  -2.9253245e+00  -3.0641498e+00
   2.3957657e+01  -2.2946665e+01   3.5000000e+02   7.0554139e-01  -3.1540706e+00  -2.8542309e+00
   2.3838706e+01  -2.2880307e+01   3.5000000e+02   8.1292675e-01  -3.3741362e+00  -2.6231139e+00
   2.3716262e+01  -2.2819677e+01   3.5000000e+02   9.0874317e-01  -3.5843890e+00  -2.3728937e+00
   2.3590649e+01  -2.2764933e+01   3.5000000e+02   9.9383850e-01  -3.7838171e+00  -2.1056295e+00
   2.3462196e+01  -2.2716217e+01   3.5000000e+02   1.0694082e+00  -3.9714848e+00  -1.8232886e+00
   2.3331240e+01  -2.2673656e+01   3.5000000e+02   1.1369483e+00  -4.1464757e+00  -1.5277297e+00
   2.3198125e+01  -2.2637362e+01   3.5000000e+02   1.1981977e+00  -4.3078458e+00  -1.2207110e+00
   2.3063198e+01  -2.2607429e+01   3.5000000e+02   1.2550696e+00  -4.4545929e+00  -9.0391530e-01
   2.2926808e+01  -2.2583934e+01   3.5000000e+02   1.3095751e+00  -4.5856374e+00  -5.7901027e-01
   2.2789312e+01  -2.2566939e+01   3.5000000e+02   1.3637428e+00  -4.6998223e+00  -2.4774228e-01
   2.2651066e+01  -2.2556488e+01   3.5000000e+02   1.4195447e+00  -4.7959559e+00   8.8000912e-02
   2.2512428e+01  -2.2552608e+01   3.5000000e+02   1.4788233e+00  -4.8728677e+00   4.2610004e-01
   2.2373758e+01  -2.2555309e+01   3.5000000e+02   1.5432279e+00  -4.9294912e+00   7.6413416e-01
   2.2235415e+01  -2.2564584e+01   3.5000000e+02   1.6141611e+00  -4.9649643e+00   1.0993400e+00
   2.2097758e+01  -2.2580409e+01   3.5000000e+02   1.6927330e+00  -4.9787348e+00   1.4285908e+00
   2.1961144e+01  -2.2602743e+01   3.5000000e+02   1.7797258e+00  -4.9706625e+00   1.7484167e+00
   2.1825929e+01  -2.2631528e+01   3.5000000e+02   1.8755662e+00  -4.9411050e+00   2.0550537e+00
   2.1692463e+01  -2.2666689e+01   3.5000000e+02   1.9803085e+00  -4.8909749e+00   2.3445422e+00
   2.1561096e+01  -2.2708134e+01   3.5000000e+02   2.0936229e+00  -4.8217612e+00   2.6128270e+00
   2.1432169e+01  -2.2755756e+01   3.5000000e+02   2.2148019e+00  -4.7355043e+00   2.8559131e+00
   2.1306022e+01  -2.2809431e+01   3.5000000e+02   2.3427637e+00  -4.6347359e+00   3.0699966e+00
   2.1182986e+01  -2.2869017e+01   3.5000000e+02   2.4760744e+00  -4.5223733e+00   3.2516355e+00
   2.1063386e+01  -2.2934361e+01   3.5000000e+02   2.6129908e+00  -4.4015891e+00   3.3978667e+00
   2.0947538e+01  -2.3005290e+01   3.5000000e+02   2.7514892e+00  -4.2756661e+00   3.5063508e+00
   2.0835752e+01  -2.3081620e+01   3.5000000e+02   2.8893319e+00  -4.1478511e+00   3.5754411e+00
   2.0728326e+01  -2.3163150e+01   3.5000000e+02   3.0241196e+00  -4.0212142e+00   3.6042740e+00
   2.0625550e+01  -2.3249666e+01   3.5000000e+02   3.1533621e+00  -3.8985373e+00   3.5927832e+00
   2.0527703e+01  -2.3340941e+01   3.5000000e+02   3.2745456e+00  -3.7822226e+00   3.5417023e+00
   2.0435052e+01  -2.3436734e+01   3.5000000e+02   3.3851976e+00  -3.6742340e+00   3.4525332e+00
   2.0347853e+01  -2.3536793e+01   3.5000000e+02   3.4829506e+00  -3.5760696e+00   3.3274659e+00
   2.0266347e+01  -2.3640853e+01   3.5000000e+02   3.5655940e+00  -3.4887554e+00   3.1692934e+00
   2.0190764e+01  -2.3748638e+01   3.5000000e+02   3.6311199e+00  -3.4128698e+00   2.9812764e+00
   2.0121319e+01  -2.3859862e+01   3.5000000e+02   3.6777588e+00  -3.3485757e+00   2.7670109e+00
   2.0058212e+01  -2.3974230e+01   3.5000000e+02   3.7040045e+00  -3.2956676e+00   2.5302824e+00
   2.0001628e+01  -2.4091435e+01   3.5000000e+02   3.7086317e+00  -3.2536241e+00   2.2749376e+00
   1.9951736e+01  -2.4211165e+01   3.5000000e+02   3.6907117e+00  -3.2216618e+00   2.0047431e+00
   1.9908688e+01  -2.4333099e+01   3.5000000e+02   3.6496229e+00  -3.1987857e+00   1.7233003e+00
   1.9658258e+01  -2.4964135e+01   3.5000000e+02   3.0904697e+00  -3.0638286e+00   5.4633014e-01
   1.9658331e+01  -2.5092538e+01   3.5000000e+02   2.9208221e+00  -3.0763149e+00   2.6165810e-01
   1.9665471e+01  -2.5220779e+01   3.5000000e+02   2.7335490e+00  -3.0886739e+00  -1.6846684e-02
   1.9679684e+01  -2.5348537e+01   3.5000000e+02   2.5305746e+00  -3.0995489e+00  -2.8794607e-01
   1.9700956e+01  -2.5475495e+01   3.5000000e+02   2.3140006e+00  -3.1076020e+00  -5.5061873e-01
   1.9729257e+01  -2.5601333e+01   3.5000000e+02   2.0860355e+00  -3.1115147e+00  -8.0404415e-01
   1.9764537e+01  -2.5725737e+01   3.5000000e+02   1.8488919e+00  -3.1099801e+00  -1.0475927e+00
   1.9806729e+01  -2.5848391e+01   3.5000000e+02   1.6047169e+00  -3.1017008e+00  -1.2807942e+00
   1.9855750e+01  -2.5968986e+01   3.5000000e+02   1.3555046e+00  -3.0853867e+00  -1.5033159e+00
   1.9911494e+01  -2.6087216e+01   3.5000000e+02   1.1030595e+00  -3.0597598e+00  -1.7148954e+00
   1.9973842e+01  -2.6202779e+01   3.5000000e+02   8.4897411e-01  -3.0235731e+00  -1.9153102e+00
   2.0042654e+01  -2.6315381e+01   3.5000000e+02   5.9463573e-01  -2.9756327e+00  -2.1043100e+00
   2.0117773e+01  -2.6424733e+01   3.5000000e+02   3.4126933e-01  -2.9148356e+00  -2.2815748e+00
   2.0199024e+01  -2.6530553e+01   3.5000000e+02   8.9989730e-02  -2.8402085e+00  -2.4466794e+00
   2.0286214e+01  -2.6632570e+01   3.5000000e+02  -1.5814413e-01  -2.7509476e+00  -2.5990734e+00
   2.0379135e+01  -2.6730519e+01   3.5000000e+02  -4.0206468e-01  -2.6464564e+00  -2.7380844e+00
   2.0477561e+01  -2.6824146e+01   3.5000000e+02  -6.4066363e-01  -2.5263714e+00  -2.8629236e+00
   2.0581251e+01  -2.6913208e+01   3.5000000e+02  -8.7277619e-01  -2.3905767e+00  -2.9727127e+00
   2.0689946e+01  -2.6997472e+01   3.5000000e+02  -1.0971851e+00  -2.2392128e+00  -3.0665057e+00
   2.0803374e+01  -2.7076718e+01   3.5000000e+02  -1.3126601e+00  -2.0726695e+00  -3.1433219e+00
   2.0921248e+01  -2.7150738e+01   3.5000000e+02  -1.5180031e+00  -1.8915830e+00  -3.2021681e+00
   2.1043269e+01  -2.7219339e+01   3.5000000e+02  -1.7121115e+00  -1.6968288e+00  -3.2420630e+00
   2.1169124e+01  -2.7282339e+01   3.5000000e+02  -1.8940286e+00  -1.4895305e+00  -3.2620669e+00
   2.1298486e+01  -2.7339571e+01   3.5000000e+02  -2.0630009e+00  -1.2710685e+00  -3.2613134e+00
   2.1431022e+01  -2.7390886e+01   3.5000000e+02  -2.2185264e+00  -1.0430832e+00  -3.2390575e+00
   2.1566384e+01  -2.7436147e+01   3.5000000e+02  -2.3603634e+00  -8.0750907e-01  -3.1947398e+00
   2.1704218e+01  -2.7475234e+01   3.5000000e+02  -2.4885500e+00  -5.6656770e-01  -3.1280610e+00
   2.1844161e+01  -2.7508043e+01   3.5000000e+02  -2.6033906e+00  -3.2276893e-01  -3.0390674e+00
   2.1985845e+01  -2.7534487e+01   3.5000000e+02  -2.7054341e+00  -7.8877135e-02  -2.9282376e+00
   2.2128894e+01  -2.7554495e+01   3.5000000e+02  -2.7954328e+00   1.6213763e-01  -2.7965660e+00
   2.2272929e+01  -2.7568015e+01   3.5000000e+02  -2.8742990e+00   3.9719383e-01  -2.6456172e+00
   2.2417568e+01  -2.7575011e+01   3.5000000e+02  -2.9430468e+00   6.2320870e-01  -2.4775607e+00
   2.2562425e+01  -2.7575463e+01   3.5000000e+02  -3.0027359e+00   8.3722933e-01  -2.2951622e+00
   2.2707117e+01  -2.7569371e+01   3.5000000e+02  -3.0544220e+00   1.0365851e+00  -2.1017095e+00
   2.2851258e+01  -2.7556750e+01   3.5000000e+02  -3.0991033e+00   1.2190083e+00  -1.9009264e+00
   2.2994466e+01  -2.7537635e+01   3.5000000e+02  -3.1376892e+00   1.3827552e+00  -1.6968105e+00
   2.3136361e+01  -2.7512076e+01   3.5000000e+02  -3.1709716e+00   1.5266707e+00  -1.4934797e+00
   2.3276567e+01  -2.7480142e+01   3.5000000e+02  -3.1996167e+00   1.6502180e+00  -1.2949856e+00
   2.3414714e+01  -2.7441917e+01   3.5000000e+02  -3.2241646e+00   1.7534562e+00  -1.1051564e+00
   2.3550439e+01  -2.7397502e+01   3.5000000e+02  -3.2450408e+00   1.8369767e+00  -9.2745526e-01
   2.3683386e+01  -2.7347016e+01   3.5000000e+02  -3.2625730e+00   1.9018071e+00  -7.6488220e-01
   2.3813207e+01  -2.7290592e+01   3.5000000e+02  -3.2770089e+00   1.9492982e+00  -6.1992863e-01
   2.3939565e+01  -2.7228379e+01   3.5000000e+02  -3.2885349e+00   1.9810079e+00  -4.9455455e-01
   2.4062135e+01  -2.7160542e+01   3.5000000e+02  -3.2972884e+00   1.9985914e+00  -3.9020797e-01
   2.4180600e+01  -2.7087259e+01   3.5000000e+02  -3.3033635e+00   2.0037062e+00  -3.0788585e-01
   2.4294660e+01  -2.7008723e+01   3.5000000e+02  -3.3068125e+00   1.9979400e+00  -2.4816709e-01
   2.4404026e+01  -2.6925139e+01   3.5000000e+02  -3.3076379e+00   1.9827558e+00  -2.1129271e-01
   2.4508422e+01  -2.6836727e+01   3.5000000e+02  -3.3057812e+00   1.9594579e+00  -1.9720956e-01
   2.4607590e+01  -2.6743716e+01   3.5000000e+02  -3.3011078e+00   1.9291713e+00  -2.0561985e-01
   2.4701285e+01  -2.6646349e+01   3.5000000e+02  -3.2933919e+00   1.8928351e+00  -2.3601474e-01
   2.4789280e+01  -2.6544879e+01   3.5000000e+02  -3.2823025e+00   1.8512029e+00  -2.8769670e-01
   2.4871364e+01  -2.6439568e+01   3.5000000e+02  -3.2673948e+00   1.8048492e+00  -3.5979953e-01
   2.4947340e+01  -2.6330687e+01   3.5000000e+02  -3.2481087e+00   1.7541805e+00  -4.5129837e-01
   2.5017033e+01  -2.6218517e+01   3.5000000e+02  -3.2237804e+00   1.6994445e+00  -5.6099416e-01
   2.5080283e+01  -2.6103346e+01   3.5000000e+02  -3.1936598e+00   1.6407419e+00  -6.8753566e-01
   2.5136947e+01  -2.5985467e+01   3.5000000e+02  -3.1569406e+00   1.5780337e+00  -8.2942330e-01
   2.5186903e+01  -2.5865180e+01   3.5000000e+02  -3.1128009e+00   1.5111467e+00  -9.8500661e-01
   2.5230044e+01  -2.5742792e+01   3.5000000e+02  -3.0604432e+00   1.4397794e+00  -1.1525099e+00
   2.5266284e+01  -2.5618612e+01   3.5000000e+02  -2.9991361e+00   1.3635017e+00  -1.3300511e+00
   2.5295552e+01  -2.5492953e+01   3.5000000e+02  -2.9282482e+00   1.2817609e+00  -1.5156699e+00
   2.5317797e+01  -2.5366131e+01   3.5000000e+02  -2.8472775e+00   1.1938889e+00  -1.7073411e+00
   2.5332986e+01  -2.5238464e+01   3.5000000e+02  -2.7558668e+00   1.0991168e+00  -1.9029939e+00
   2.5341104e+01  -2.5110271e+01   3.5000000e+02  -2.6538106e+00   9.9659783e-01  -2.1005185e+00
   2.5342152e+01  -2.4981871e+01   3.5000000e+02  -2.5410537e+00   8.8544008e-01  -2.2977632e+00
   2.5336150e+01  -2.4853584e+01   3.5000000e+02  -2.4176932e+00   7.6475098e-01  -2.4925123e+00
   2.5323136e+01  -2.4725725e+01   3.5000000e+02  -2.2839742e+00   6.3368449e-01  -2.6824742e+00
   2.5303161e+01  -2.4598612e+01   3.5000000e+02  -2.1402998e+00   4.9150545e-01  -2.8652560e+00
   2.5276298e+01  -2.4472555e+01   3.5000000e+02  -1.9872436e+00   3.3764121e-01  -3.0383569e+00
   2.5242631e+01  -2.4347866e+01   3.5000000e+02  -1.8255682e+00   1.7174512e-01  -3.1991783e+00
   2.5202263e+01  -2.4224848e+01   3.5000000e+02  -1.6562413e+00  -6.2645979e-03  -3.3450594e+00
   2.5155311e+01  -2.4103801e+01   3.5000000e+02  -1.4804505e+00  -1.9616565e-01  -3.4733341e+00
   2.5101907e+01  -2.3985020e+01   3.5000000e+02  -1.2996030e+00  -3.9741566e-01  -3.5814130e+00
   2.5042198e+01  -2.3868793e+01   3.5000000e+02  -1.1153073e+00  -6.0915556e-01  -3.6668791e+00
   2.4976345e+01  -2.3755401e+01   3.5000000e+02  -9.2933886e-01  -8.3022958e-01  -3.7275867e+00
   2.4904522e+01  -2.3645119e+01   3.5000000e+02  -7.4358887e-01  -1.0592205e+00  -3.7617530e+00
   2.4826917e+01  -2.3538210e+01   3.5000000e+02  -5.5999983e-01  -1.2945060e+00  -3.7680328e+00
   2.4743728e+01  -2.3434933e+01   3.5000000e+02  -3.8050034e-01  -1.5343087e+00  -3.7455694e+00
   2.4655167e+01  -2.3335535e+01   3.5000000e+02  -2.0693771e-01  -1.7767659e+00  -3.6940187e+00
   2.4561458e+01  -2.3240254e+01   3.5000000e+02  -4.1016191e-02  -2.0199902e+00  -3.6135470e+00
   2.4462834e+01  -2.3149316e+01   3.5000000e+02   1.1576338e-01  -2.2621362e+00  -3.5048007e+00
   2.4359540e+01  -2.3062940e+01   3.5000000e+02   2.6214523e-01  -2.5014442e+00  -3.3688592e+00
   2.4251828e+01  -2.2981331e+01   3.5000000e+02   3.9716790e-01  -2.7362977e+00  -3.2071584e+00
   2.4139963e+01  -2.2904682e+01   3.5000000e+02   5.2018884e-01  -2.9652433e+00  -3.0214116e+00
   2.4024215e+01  -2.2833175e+01   3.5000000e+02   6.3091820e-01  -3.1870119e+00  -2.8135116e+00
   2.3904864e+01  -2.2766980e+01   3.5000000e+02   7.2942924e-01  -3.4005097e+00  -2.5854409e+00
   2.3782195e+01  -2.2706254e+01   3.5000000e+02   8.1616711e-01  -3.6048017e+00  -2.3391764e+00
   2.3656504e+01  -2.2651139e+01   3.5000000e+02   8.9193292e-01  -3.7990658e+00  -2.0766231e+00
   2.3528089e+01  -2.2601767e+01   3.5000000e+02   9.5786868e-01  -3.9825476e+00  -1.7995553e+00
   2.3397254e+01  -2.2558253e+01   3.5000000e+02   1.0154113e+00  -4.1545033e+00  -1.5095909e+00
   2.3264310e+01  -2.2520700e+01   3.5000000e+02   1.0662418e+00  -4.3141383e+00  -1.2082071e+00
   2.3129570e+01  -2.2489197e+01   3.5000000e+02   1.1122245e+00  -4.4605698e+00  -8.9676582e-01
   2.2993353e+01  -2.2463818e+01   3.5000000e+02   1.1553340e+00  -4.5927956e+00  -5.7658284e-01
   2.2855977e+01  -2.2444622e+01   3.5000000e+02   1.1975862e+00  -4.7096966e+00  -2.4899406e-01
   2.2717767e+01  -2.2431654e+01   3.5000000e+02   1.2409647e+00  -4.8100530e+00   8.4536151e-02
   2.2579046e+01  -2.2424946e+01   3.5000000e+02   1.2873609e+00  -4.8926024e+00   4.2234392e-01
   2.2440140e+01  -2.2424512e+01   3.5000000e+02   1.3385063e+00  -4.9561127e+00   7.6248100e-01
   2.2301374e+01  -2.2430354e+01   3.5000000e+02   1.3959313e+00  -4.9994774e+00   1.1026565e+00
   2.2163073e+01  -2.2442458e+01   3.5000000e+02   1.4609169e+00  -5.0218228e+00   1.4402044e+00
   2.2025563e+01  -2.2460796e+01   3.5000000e+02   1.5344633e+00  -5.0226156e+00   1.7720748e+00
   2.1889167e+01  -2.2485325e+01   3.5000000e+02   1.6172627e+00  -5.0017628e+00   2.0948753e+00
   2.1754204e+01  -2.2515986e+01   3.5000000e+02   1.7096770e+00  -4.9596890e+00   2.4049383e+00
   2.1620993e+01  -2.2552708e+01   3.5000000e+02   1.8117298e+00  -4.8973824e+00   2.6983988e+00
   2.1489849e+01  -2.2595404e+01   3.5000000e+02   1.9230936e+00  -4.8164054e+00   2.9713266e+00
   2.1361081e+01  -2.2643974e+01   3.5000000e+02   2.0430950e+00  -4.7188590e+00   3.2198597e+00
   2.1234995e+01  -2.2698303e+01   3.5000000e+02   2.1707190e+00  -4.6073127e+00   3.4403368e+00
   2.1111892e+01  -2.2758262e+01   3.5000000e+02   2.3046278e+00  -4.4846983e+00   3.6294362e+00
   2.0992065e+01  -2.2823711e+01   3.5000000e+02   2.4431938e+00  -4.3541764e+00   3.7842990e+00
   2.0875802e+01  -2.2894493e+01   3.5000000e+02   2.5845238e+00  -4.2190006e+00   3.9026368e+00
   2.0763384e+01  -2.2970442e+01   3.5000000e+02   2.7265188e+00  -4.0823750e+00   3.9828022e+00
   2.0655083e+01  -2.3051378e+01   3.5000000e+02   2.8669170e+00  -3.9473264e+00   4.0238580e+00
   2.0551163e+01  -2.3137108e+01   3.5000000e+02   3.0033526e+00  -3.8165997e+00   4.0256012e+00
   2.0451879e+01  -2.3227427e+01   3.5000000e+02   3.1334171e+00  -3.6925764e+00   3.9885643e+00
   2.0357477e+01  -2.3322122e+01   3.5000000e+02   3.2547240e+00  -3.5772237e+00   3.9139774e+00
   2.0268192e+01  -2.3420965e+01   3.5000000e+02   3.3649541e+00  -3.4720663e+00   3.8037360e+00
   2.0184248e+01  -2.3523721e+01   3.5000000e+02   3.4619165e+00  -3.3781854e+00   3.6603009e+00
   2.0105859e+01  -2.3630143e+01   3.5000000e+02   3.5435842e+00  -3.2962384e+00   3.4866086e+00
   2.0033225e+01  -2.3739975e+01   3.5000000e+02   3.6081313e+00  -3.2264858e+00   3.2859538e+00
   1.9966537e+01  -2.3852954e+01   3.5000000e+02   3.6539593e+00  -3.1688406e+00   3.0618483e+00
   1.9905970e+01  -2.3968805e+01   3.5000000e+02   3.6797113e+00  -3.1229050e+00   2.8179226e+00
   1.9851686e+01  -2.4087250e+01   3.5000000e+02   3.6842896e+00  -3.0880248e+00   2.5577767e+00
   1.9803834e+01  -2.4208001e+01   3.5000000e+02   3.6668629e+00  -3.0633337e+00   2.2849013e+00
   1.9762549e+01  -2.4330765e+01   3.5000000e+02   3.6268783e+00  -3.0477971e+00   2.0025874e+00
   1.9727950e+01  -2.4455242e+01   3.5000000e+02   3.5640746e+00  -3.0402481e+00   1.7138837e+00
   1.9700141e+01  -2.4581127e+01   3.5000000e+02   3.4784974e+00  -3.0394235e+00   1.4215616e+00
   1.9679211e+01  -2.4708114e+01   3.5000000e+02   3.3705121e+00  -3.0439954e+00   1.1280975e+00
   1.9665231e+01  -2.4835888e+01   3.5000000e+02   3.2408228e+00  -3.0525926e+00   8.3570797e-01
   1.9561507e+01  -2.5500819e+01   3.5000000e+02   2.2794263e+00  -3.0134477e+00  -2.9542291e-01
   1.9589726e+01  -2.5626946e+01   3.5000000e+02   2.0558454e+00  -3.0260351e+00  -5.4232624e-01
   1.9624627e+01  -2.5751714e+01   3.5000000e+02   1.8235932e+00  -3.0336448e+00  -7.7949965e-01
   1.9666153e+01  -2.5874835e+01   3.5000000e+02   1.5847290e+00  -3.0350911e+00  -1.0065934e+00
   1.9714228e+01  -2.5996026e+01   3.5000000e+02   1.3411538e+00  -3.0291923e+00  -1.2233919e+00
   1.9768761e+01  -2.6115005e+01   3.5000000e+02   1.0945697e+00  -3.0147747e+00  -1.4297749e+00
   1.9829646e+01  -2.6231497e+01   3.5000000e+02   8.4644787e-01  -2.9906793e+00  -1.6256708e+00
   1.9896760e+01  -2.6345231e+01   3.5000000e+02   5.9804508e-01  -2.9557808e+00  -1.8109947e+00
   1.9969966e+01  -2.6455941e+01   3.5000000e+02   3.5043809e-01  -2.9090154e+00  -1.9856042e+00
   2.0049110e+01  -2.6563367e+01   3.5000000e+02   1.0457990e-01  -2.8494149e+00  -2.1492529e+00
   2.0134023e+01  -2.6667257e+01   3.5000000e+02  -1.3863801e-01  -2.7761436e+00  -2.3015684e+00
   2.0224521e+01  -2.6767366e+01   3.5000000e+02  -3.7831914e-01  -2.6885331e+00  -2.4420431e+00
   2.0320404e+01  -2.6863457e+01   3.5000000e+02  -6.1351167e-01  -2.5861102e+00  -2.5700387e+00
   2.0421461e+01  -2.6955302e+01   3.5000000e+02  -8.4318308e-01  -2.4686128e+00  -2.6848132e+00
   2.0527463e+01  -2.7042683e+01   3.5000000e+02  -1.0662126e+00  -2.3359978e+00  -2.7855310e+00
   2.0638171e+01  -2.7125392e+01   3.5000000e+02  -1.2814162e+00  -2.1884362e+00  -2.8713008e+00
   2.0753330e+01  -2.7203230e+01   3.5000000e+02  -1.4875822e+00  -2.0263099e+00  -2.9411880e+00
   2.0872674e+01  -2.7276011e+01   3.5000000e+02  -1.6835354e+00  -1.8501998e+00  -2.9942355e+00
   2.0995925e+01  -2.7343561e+01   3.5000000e+02  -1.8681949e+00  -1.6608862e+00  -3.0294783e+00
   2.1122795e+01  -2.7405716e+01   3.5000000e+02  -2.0406307e+00  -1.4593561e+00  -3.0459662e+00
   2.1252984e+01  -2.7462327e+01   3.5000000e+02  -2.2001190e+00  -1.2468203e+00  -3.0427835e+00
   2.1386183e+01  -2.7513257e+01   3.5000000e+02  -2.3461769e+00  -1.0247359e+00  -3.0190962e+00
   2.1522075e+01  -2.7558383e+01   3.5000000e+02  -2.4785881e+00  -7.9483062e-01  -2.9742076e+00
   2.1660335e+01  -2.7597595e+01   3.5000000e+02  -2.5974089e+00  -5.5912374e-01  -2.9076336e+00
   2.1800629e+01  -2.7630798e+01   3.5000000e+02  -2.7029614e+00  -3.1993399e-01  -2.8191870e+00
   2.1942620e+01  -2.7657911e+01   3.5000000e+02  -2.7958147e+00  -7.9856745e-02  -2.7090722e+00
   2.2085964e+01  -2.7678868e+01   3.5000000e+02  -2.8767492e+00   1.5827244e-01  -2.5779736e+00
   2.2230314e+01  -2.7693619e+01   3.5000000e+02  -2.9467154e+00   3.9145746e-01  -2.4271261e+00
   2.2375319e+01  -2.7702127e+01   3.5000000e+02  -3.0067801e+00   6.1664199e-01  -2.2583706e+00
   2.2520628e+01  -2.7704372e+01   3.5000000e+02  -3.0580761e+00   8.3084511e-01  -2.0741509e+00
   2.2665886e+01  -2.7700348e+01   3.5000000e+02  -3.1017437e+00   1.0312951e+00  -1.8774894e+00
   2.2810741e+01  -2.7690065e+01   3.5000000e+02  -3.1388839e+00   1.2155805e+00  -1.6718914e+00
   2.2954841e+01  -2.7673548e+01   3.5000000e+02  -3.1705146e+00   1.3817673e+00  -1.4612233e+00
   2.3097836e+01  -2.7650838e+01   3.5000000e+02  -3.1975398e+00   1.5284918e+00  -1.2495502e+00
   2.3239380e+01  -2.7621989e+01   3.5000000e+02  -3.2207304e+00   1.6550082e+00  -1.0409638e+00
   2.3379131e+01  -2.7587071e+01   3.5000000e+02  -3.2407191e+00   1.7611870e+00  -8.3940430e-01
   2.3516752e+01  -2.7546171e+01   3.5000000e+02  -3.2580052e+00   1.8474692e+00  -6.4850453e-01
   2.3651913e+01  -2.7499386e+01   3.5000000e+02  -3.2729680e+00   1.9147821e+00  -4.7148556e-01
   2.3784289e+01  -2.7446830e+01   3.5000000e+02  -3.2858856e+00   1.9644312e+00  -3.1106959e-01
   2.3913567e+01  -2.7388631e+01   3.5000000e+02  -3.2969556e+00   1.9979845e+00  -1.6944006e-01
   2.4039440e+01  -2.7324929e+01   3.5000000e+02  -3.3063122e+00   2.0171536e+00  -4.8265468e-02
   2.4161611e+01  -2.7255877e+01   3.5000000e+02  -3.3140405e+00   2.0236918e+00   5.1275771e-02
   2.4279795e+01  -2.7181642e+01   3.5000000e+02  -3.3201836e+00   2.0193099e+00   1.2844766e-01
   2.4393717e+01  -2.7102402e+01   3.5000000e+02  -3.3247444e+00   2.0056104e+00   1.8288244e-01
   2.4503114e+01  -2.7018346e+01   3.5000000e+02  -3.3276807e+00   1.9840441e+00   2.1452246e-01
   2.4607736e+01  -2.6929676e+01   3.5000000e+02  -3.3288952e+00   1.9558831e+00   2.2357101e-01
   2.4707347e+01  -2.6836603e+01   3.5000000e+02  -3.3282229e+00   1.9222063e+00   2.1043897e-01
   2.4801723e+01  -2.6739348e+01   3.5000000e+02  -3.3254162e+00   1.8838988e+00   1.7570868e-01
   2.4890655e+01  -2.6638142e+01   3.5000000e+02  -3.3201321e+00   1.8416556e+00   1.2011668e-01
   2.4973949e+01  -2.6533223e+01   3.5000000e+02  -3.3119214e+00   1.7959923e+00   4.4533416e-02
   2.5051423e+01  -2.6424839e+01   3.5000000e+02  -3.3002263e+00   1.7472600e+00  -5.0041310e-02
   2.5122915e+01  -2.6313244e+01   3.5000000e+02  -3.2843862e+00   1.6956573e+00  -1.6247301e-01
   2.5188275e+01  -2.6198700e+01   3.5000000e+02  -3.2636526e+00   1.6412479e+00  -2.9150205e-01
   2.5247369e+01  -2.6081474e+01   3.5000000e+02  -3.2372159e+00   1.5839708e+00  -4.3574304e-01
   2.5300079e+01  -2.5961839e+01   3.5000000e+02  -3.2042402e+00   1.5236498e+00  -5.9368740e-01
   2.5346303e+01  -2.5840072e+01   3.5000000e+02  -3.1639028e+00   1.4599981e+00  -7.6371846e-01
   2.5385955e+01  -2.5716454e+01   3.5000000e+02  -3.1154351e+00   1.3926214e+00  -9.4412836e-01
   2.5418965e+01  -2.5591271e+01   3.5000000e+02  -3.0581596e+00   1.3210196e+00  -1.1331376e+00
   2.5445279e+01  -2.5464810e+01   3.5000000e+02  -2.9915159e+00   1.2445867e+00  -1.3289256e+00
   2.5464856e+01  -2.5337360e+01   3.5000000e+02  -2.9150761e+00   1.1626175e+00  -1.5296512e+00
   2.5477675e+01  -2.5209213e+01   3.5000000e+02  -2.8285554e+00   1.0743181e+00  -1.7334510e+00
   2.5483728e+01  -2.5080658e+01   3.5000000e+02  -2.7318007e+00   9.7882322e-01  -1.9384596e+00
   2.5483022e+01  -2.4951989e+01   3.5000000e+02  -2.6247890e+00   8.7522944e-01  -2.1427775e+00
   2.5475580e+01  -2.4823495e+01   3.5000000e+02  -2.5076128e+00   7.6262685e-01  -2.3444620e+00
   2.5461440e+01  -2.4695467e+01   3.5000000e+02  -2.3804833e+00   6.4015137e-01  -2.5414854e+00
   2.5440654e+01  -2.4568191e+01   3.5000000e+02  -2.2437293e+00   5.0703164e-01  -2.7317177e+00
   2.5413289e+01  -2.4441952e+01   3.5000000e+02  -2.0978195e+00   3.6264824e-01  -2.9128999e+00
   2.5379424e+01  -2.4317033e+01   3.5000000e+02  -1.9433818e+00   2.0658551e-01  -3.0826502e+00
   2.5339155e+01  -2.4193711e+01   3.5000000e+02  -1.7812320e+00   3.8675618e-02  -3.2384873e+00
   2.5292589e+01  -2.4072260e+01   3.5000000e+02  -1.6123913e+00  -1.4096559e-01  -3.3778854e+00
   2.5239846e+01  -2.3952950e+01   3.5000000e+02  -1.4380981e+00  -3.3191912e-01  -3.4983482e+00
   2.5181059e+01  -2.3836043e+01   3.5000000e+02  -1.2597969e+00  -5.3346501e-01  -3.5975017e+00
   2.5116373e+01  -2.3721796e+01   3.5000000e+02  -1.0791158e+00  -7.4459349e-01  -3.6731891e+00
   2.5045945e+01  -2.3610462e+01   3.5000000e+02  -8.9782478e-01  -9.6403307e-01  -3.7235630e+00
   2.4969943e+01  -2.3502284e+01   3.5000000e+02  -7.1777540e-01  -1.1903020e+00  -3.7471649e+00
   2.4888547e+01  -2.3397498e+01   3.5000000e+02  -5.4084415e-01  -1.4217548e+00  -3.7429811e+00
   2.4801945e+01  -2.3296334e+01   3.5000000e+02  -3.6886618e-01  -1.6566417e+00  -3.7104767e+00
   2.4710338e+01  -2.3199011e+01   3.5000000e+02  -2.0357990e-01  -1.8931695e+00  -3.6496030e+00
   2.4613934e+01  -2.3105742e+01   3.5000000e+02  -4.6569859e-02  -2.1295594e+00  -3.5607835e+00
   2.4512952e+01  -2.3016728e+01   3.5000000e+02   1.0077819e-01  -2.3641044e+00  -3.4448752e+00
   2.4407618e+01  -2.2932162e+01   3.5000000e+02   2.3732086e-01  -2.5952161e+00  -3.3031129e+00
   2.4298167e+01  -2.2852228e+01   3.5000000e+02   3.6219138e-01  -2.8214613e+00  -3.1370382e+00
   2.4184843e+01  -2.2777097e+01   3.5000000e+02   4.7483072e-01  -3.0415897e+00  -2.9484124e+00
   2.4067894e+01  -2.2706932e+01   3.5000000e+02   5.7501558e-01  -3.2545428e+00  -2.7391236e+00
   2.3947577e+01  -2.2641884e+01   3.5000000e+02   6.6286898e-01  -3.4594411e+00  -2.5110956e+00
   2.3824154e+01  -2.2582093e+01   3.5000000e+02   7.3886801e-01  -3.6555589e+00  -2.2661990e+00
   2.3697894e+01  -2.2527687e+01   3.5000000e+02   8.0383272e-01  -3.8422767e+00  -2.0061825e+00
   2.3569070e+01  -2.2478782e+01   3.5000000e+02   8.5890476e-01  -4.0190266e+00  -1.7326206e+00
   2.3437960e+01  -2.2435485e+01   3.5000000e+02   9.0551092e-01  -4.1852262e+00  -1.4468993e+00
   2.3304846e+01  -2.2397887e+01   3.5000000e+02   9.4530965e-01  -4.3402226e+00  -1.1502182e+00
   2.3170014e+01  -2.2366070e+01   3.5000000e+02   9.8013609e-01  -4.4832386e+00  -8.4363996e-01
   2.3033751e+01  -2.2340100e+01   3.5000000e+02   1.0119329e+00  -4.6133464e+00  -5.2814283e-01
   2.2896351e+01  -2.2320035e+01   3.5000000e+02   1.0426884e+00  -4.7294515e+00  -2.0472746e-01
   2.2758106e+01  -2.2305916e+01   3.5000000e+02   1.0743671e+00  -4.8303229e+00   1.2551717e-01
   2.2619311e+01  -2.2297773e+01   3.5000000e+02   1.1088535e+00  -4.9146336e+00   4.6130265e-01
   2.2480261e+01  -2.2295625e+01   3.5000000e+02   1.1479016e+00  -4.9810347e+00   8.0106310e-01
   2.2341254e+01  -2.2299476e+01   3.5000000e+02   1.1930836e+00  -5.0282480e+00   1.1428845e+00
   2.2202585e+01  -2.2309317e+01   3.5000000e+02   1.2457567e+00  -5.0551746e+00   1.4844744e+00
   2.2064549e+01  -2.2325128e+01   3.5000000e+02   1.3070349e+00  -5.0610034e+00   1.8231399e+00
   2.1927442e+01  -2.2346874e+01   3.5000000e+02   1.3777584e+00  -5.0453177e+00   2.1558065e+00
   2.1791557e+01  -2.2374510e+01   3.5000000e+02   1.4584841e+00  -5.0081836e+00   2.4790744e+00
   2.1657183e+01  -2.2407975e+01   3.5000000e+02   1.5494607e+00  -4.9502121e+00   2.7893065e+00
   2.1524609e+01  -2.2447199e+01   3.5000000e+02   1.6506306e+00  -4.8725868e+00   3.0827143e+00
   2.1394119e+01  -2.2492098e+01   3.5000000e+02   1.7616167e+00  -4.7770524e+00   3.3554956e+00
   2.1265995e+01  -2.2542575e+01   3.5000000e+02   1.8817245e+00  -4.6658650e+00   3.6039531e+00
   2.1140513e+01  -2.2598522e+01   3.5000000e+02   2.0099534e+00  -4.5417028e+00   3.8246289e+00
   2.1017944e+01  -2.2659819e+01   3.5000000e+02   2.1450098e+00  -4.4075535e+00   4.0144199e+00
   2.0898557e+01  -2.2726334e+01   3.5000000e+02   2.2853298e+00  -4.2665872e+00   4.1706739e+00
   2.0782611e+01  -2.2797925e+01   3.5000000e+02   2.4291149e+00  -4.1220126e+00   4.2912887e+00
   2.0670361e+01  -2.2874436e+01   3.5000000e+02   2.5743638e+00  -3.9769550e+00   4.3747678e+00
   2.0562055e+01  -2.2955703e+01   3.5000000e+02   2.7189283e+00  -3.8343393e+00   4.4202582e+00
   2.0457932e+01  -2.3041550e+01   3.5000000e+02   2.8605574e+00  -3.6967964e+00   4.4275805e+00
   2.0358227e+01  -2.3131792e+01   3.5000000e+02   2.9969545e+00  -3.5666037e+00   4.3972113e+00
   2.0263163e+01  -2.3226233e+01   3.5000000e+02   3.1258271e+00  -3.4456334e+00   4.3302784e+00
   2.0172956e+01  -2.3324668e+01   3.5000000e+02   3.2449402e+00  -3.3353435e+00   4.2285017e+00
   2.0087812e+01  -2.3426883e+01   3.5000000e+02   3.3521613e+00  -3.2367762e+00   4.0941321e+00
   2.0007928e+01  -2.3532655e+01   3.5000000e+02   3.4454994e+00  -3.1505801e+00   3.9298651e+00
   1.9933490e+01  -2.3641754e+01   3.5000000e+02   3.5231379e+00  -3.0770386e+00   3.7387383e+00
   1.9864676e+01  -2.3753940e+01   3.5000000e+02   3.5834566e+00  -3.0161122e+00   3.5240260e+00
   1.9801649e+01  -2.3868967e+01   3.5000000e+02   3.6250498e+00  -2.9674721e+00   3.2891267e+00
   1.9744563e+01  -2.3986583e+01   3.5000000e+02   3.6467389e+00  -2.9305506e+00   3.0374459e+00
   1.9693560e+01  -2.4106528e+01   3.5000000e+02   3.6475792e+00  -2.9045773e+00   2.7723126e+00
   1.9648769e+01  -2.4228537e+01   3.5000000e+02   3.6268701e+00  -2.8886158e+00   2.4968953e+00
   1.9610308e+01  -2.4352341e+01   3.5000000e+02   3.5841650e+00  -2.8816003e+00   2.2141418e+00
   1.9578279e+01  -2.4477663e+01   3.5000000e+02   3.5192858e+00  -2.8823587e+00   1.9267676e+00
   1.9552774e+01  -2.4604225e+01   3.5000000e+02   3.4323398e+00  -2.8896487e+00   1.6372139e+00
   1.9533868e+01  -2.4731743e+01   3.5000000e+02   3.3237371e+00  -2.9021737e+00   1.3476785e+00
   1.9521625e+01  -2.4859933e+01   3.5000000e+02   3.1942030e+00  -2.9186132e+00   1.0601023e+00
   1.9516092e+01  -2.4988506e+01   3.5000000e+02   3.0447853e+00  -2.9376349e+00   7.7621046e-01
   1.9517303e+01  -2.5117173e+01   3.5000000e+02   2.8768423e+00  -2.9579172e+00   4.9750720e-01
   1.9525276e+01  -2.5245641e+01   3.5000000e+02   2.6920205e+00  -2.9781575e+00   2.2530048e-01
   1.9540015e+01  -2.5373620e+01   3.5000000e+02   2.4921986e+00  -2.9970828e+00  -3.9311503e-02
   1.9582278e+01  -2.6044625e+01   3.5000000e+02   1.2810525e+00  -2.9539565e+00  -9.8403918e-01
   1.9636798e+01  -2.6163869e+01   3.5000000e+02   1.0404042e+00  -2.9484522e+00  -1.1826836e+00
   1.9697417e+01  -2.6280740e+01   3.5000000e+02   7.9855162e-01  -2.9339154e+00  -1.3714158e+00
   1.9764025e+01  -2.6394989e+01   3.5000000e+02   5.5659194e-01  -2.9093030e+00  -1.5502911e+00
   1.9836497e+01  -2.6506371e+01   3.5000000e+02   3.1543805e-01  -2.8736157e+00  -1.7193040e+00
   1.9914695e+01  -2.6614647e+01   3.5000000e+02   7.5873998e-02  -2.8259285e+00  -1.8783495e+00
   1.9998467e+01  -2.6719585e+01   3.5000000e+02  -1.6137580e-01  -2.7654225e+00  -2.0271921e+00
   2.0087649e+01  -2.6820956e+01   3.5000000e+02  -3.9557052e-01  -2.6914208e+00  -2.1654594e+00
   2.0182062e+01  -2.6918543e+01   3.5000000e+02  -6.2590969e-01  -2.6034092e+00  -2.2926388e+00
   2.0281515e+01  -2.7012132e+01   3.5000000e+02  -8.5148058e-01  -2.5010594e+00  -2.4081025e+00
   2.0385805e+01  -2.7101520e+01   3.5000000e+02  -1.0712599e+00  -2.3842299e+00  -2.5111283e+00
   2.0494715e+01  -2.7186511e+01   3.5000000e+02  -1.2841187e+00  -2.2529667e+00  -2.6009211e+00
   2.0608019e+01  -2.7266919e+01   3.5000000e+02  -1.4888657e+00  -2.1074888e+00  -2.6766386e+00
   2.0725477e+01  -2.7342569e+01   3.5000000e+02  -1.6842979e+00  -1.9481809e+00  -2.7373946e+00
   2.0846840e+01  -2.7413292e+01   3.5000000e+02  -1.8692557e+00  -1.7755872e+00  -2.7822796e+00
   2.0971849e+01  -2.7478933e+01   3.5000000e+02  -2.0426957e+00  -1.5904103e+00  -2.8103564e+00
   2.1100234e+01  -2.7539347e+01   3.5000000e+02  -2.2037385e+00  -1.3935292e+00  -2.8206740e+00
   2.1231716e+01  -2.7594400e+01   3.5000000e+02  -2.3517167e+00  -1.1860234e+00  -2.8122919e+00
   2.1366011e+01  -2.7643970e+01   3.5000000e+02  -2.4862097e+00  -9.6919951e-01  -2.7843178e+00
   2.1502822e+01  -2.7687946e+01   3.5000000e+02  -2.6070567e+00  -7.4463692e-01  -2.7359614e+00
   2.1641851e+01  -2.7726231e+01   3.5000000e+02  -2.7143706e+00  -5.1419876e-01  -2.6666091e+00
   2.1782789e+01  -2.7758739e+01   3.5000000e+02  -2.8085217e+00  -2.8006247e-01  -2.5759148e+00
   2.1925324e+01  -2.7785398e+01   3.5000000e+02  -2.8901244e+00  -4.4699452e-02  -2.4638930e+00
   2.2069141e+01  -2.7806148e+01   3.5000000e+02  -2.9600046e+00   1.8915945e-01  -2.3310156e+00
   2.2213918e+01  -2.7820943e+01   3.5000000e+02  -3.0191591e+00   4.1858564e-01  -2.1782940e+00
   2.2359334e+01  -2.7829750e+01   3.5000000e+02  -3.0687111e+00   6.4056343e-01  -2.0073338e+00
   2.2505064e+01  -2.7832548e+01   3.5000000e+02  -3.1098558e+00   8.5210731e-01  -1.8203627e+00
   2.2650783e+01  -2.7829332e+01   3.5000000e+02  -3.1438097e+00   1.0504111e+00  -1.6201971e+00
   2.2796165e+01  -2.7820109e+01   3.5000000e+02  -3.1717580e+00   1.2329894e+00  -1.4101810e+00
   2.2940886e+01  -2.7804899e+01   3.5000000e+02  -3.1948102e+00   1.3978121e+00  -1.1940645e+00
   2.3084624e+01  -2.7783737e+01   3.5000000e+02  -3.2139651e+00   1.5434046e+00  -9.7584721e-01
   2.3227059e+01  -2.7756669e+01   3.5000000e+02  -3.2300856e+00   1.6689065e+00  -7.5961456e-01
   2.3367874e+01  -2.7723757e+01   3.5000000e+02  -3.2438876e+00   1.7740844e+00  -5.4934982e-01
   2.3506758e+01  -2.7685074e+01   3.5000000e+02  -3.2559397e+00   1.8592978e+00  -3.4877918e-01
   2.3643404e+01  -2.7640706e+01   3.5000000e+02  -3.2666738e+00   1.9254223e+00  -1.6124183e-01
   2.3777513e+01  -2.7590751e+01   3.5000000e+02  -3.2764016e+00   1.9737480e+00   1.0405338e-02
   2.3908790e+01  -2.7535322e+01   3.5000000e+02  -3.2853351e+00   2.0058601e+00   1.6383214e-01
   2.4036949e+01  -2.7474540e+01   3.5000000e+02  -3.2936081e+00   2.0235222e+00   2.9723505e-01
   2.4161713e+01  -2.7408541e+01   3.5000000e+02  -3.3012933e+00   2.0285665e+00   4.0932595e-01
   2.4282813e+01  -2.7337470e+01   3.5000000e+02  -3.3084164e+00   2.0228018e+00   4.9926565e-01
   2.4399990e+01  -2.7261485e+01   3.5000000e+02  -3.3149631e+00   2.0079422e+00   5.6661458e-01
   2.4512996e+01  -2.7180752e+01   3.5000000e+02  -3.3208815e+00   1.9855556e+00   6.1125720e-01
   2.4621593e+01  -2.7095449e+01   3.5000000e+02  -3.3260774e+00   1.9570312e+00   6.3334708e-01
   2.4725553e+01  -2.7005763e+01   3.5000000e+02  -3.3304064e+00   1.9235617e+00   6.3324634e-01
   2.4824663e+01  -2.6911889e+01   3.5000000e+02  -3.3336616e+00   1.8861365e+00   6.1149024e-01
   2.4918718e+01  -2.6814033e+01   3.5000000e+02  -3.3355603e+00   1.8455462e+00   5.6874848e-01
   2.5007530e+01  -2.6712406e+01   3.5000000e+02  -3.3357310e+00   1.8023888e+00   5.0580780e-01
   2.5090920e+01  -2.6607230e+01   3.5000000e+02  -3.3337030e+00   1.7570869e+00   4.2355880e-01
   2.5168725e+01  -2.6498730e+01   3.5000000e+02  -3.3289015e+00   1.7099013e+00   3.2298720e-01
   2.5240794e+01  -2.6387141e+01   3.5000000e+02  -3.3206523e+00   1.6609515e+00   2.0518356e-01
   2.5306989e+01  -2.6272702e+01   3.5000000e+02  -3.3081942e+00   1.6102325e+00   7.1335920e-02
   2.5367188e+01  -2.6155658e+01   3.5000000e+02  -3.2907041e+00   1.5576294e+00  -7.7257551e-02
   2.5421281e+01  -2.6036259e+01   3.5000000e+02  -3.2673297e+00   1.5029309e+00  -2.3919839e-01
   2.5469171e+01  -2.5914758e+01   3.5000000e+02  -3.2372281e+00   1.4458360e+00  -4.1299728e-01
   2.5510778e+01  -2.5791412e+01   3.5000000e+02  -3.1996079e+00   1.3859554e+00  -5.9707981e-01
   2.5546034e+01  -2.5666483e+01   3.5000000e+02  -3.1537652e+00   1.3228150e+00  -7.8981319e-01
   2.5574885e+01  -2.5540232e+01   3.5000000e+02  -3.0991107e+00   1.2558508e+00  -9.8953846e-01
   2.5597291e+01  -2.5412926e+01   3.5000000e+02  -3.0351897e+00   1.1844117e+00  -1.1945790e+00
   2.5613226e+01  -2.5284830e+01   3.5000000e+02  -2.9616828e+00   1.1077594e+00  -1.4032720e+00
   2.5622677e+01  -2.5156210e+01   3.5000000e+02  -2.8783996e+00   1.0250789e+00  -1.6139685e+00
   2.5625646e+01  -2.5027335e+01   3.5000000e+02  -2.7852682e+00   9.3549690e-01  -1.8250186e+00
   2.5622147e+01  -2.4898470e+01   3.5000000e+02  -2.6823113e+00   8.3810413e-01  -2.0347647e+00
   2.5612207e+01  -2.4769883e+01   3.5000000e+02  -2.5696404e+00   7.3199508e-01  -2.2414947e+00
   2.5595867e+01  -2.4641837e+01   3.5000000e+02  -2.4474462e+00   6.1630582e-01  -2.4434138e+00
   2.5573179e+01  -2.4514596e+01   3.5000000e+02  -2.3160109e+00   4.9026798e-01  -2.6386037e+00
   2.5544210e+01  -2.4388419e+01   3.5000000e+02  -2.1757265e+00   3.5325603e-01  -2.8250029e+00
   2.5509036e+01  -2.4263564e+01   3.5000000e+02  -2.0271238e+00   2.0483965e-01  -3.0004058e+00
   2.5467747e+01  -2.4140284e+01   3.5000000e+02  -1.8709049e+00   4.4824554e-02  -3.1624847e+00
   2.5420444e+01  -2.4018831e+01   3.5000000e+02  -1.7079724e+00  -1.2671100e-01  -3.3088397e+00
   2.5367238e+01  -2.3899449e+01   3.5000000e+02  -1.5394368e+00  -3.0940629e-01  -3.4370787e+00
   2.5308254e+01  -2.3782379e+01   3.5000000e+02  -1.3666242e+00  -5.0260675e-01  -3.5448977e+00
   2.5243625e+01  -2.3667857e+01   3.5000000e+02  -1.1910474e+00  -7.0538259e-01  -3.6301822e+00
   2.5173494e+01  -2.3556112e+01   3.5000000e+02  -1.0143693e+00  -9.1655750e-01  -3.6910949e+00
   2.5098015e+01  -2.3447369e+01   3.5000000e+02  -8.3835696e-01  -1.1347421e+00  -3.7261507e+00
   2.5017352e+01  -2.3341845e+01   3.5000000e+02  -6.6482123e-01  -1.3583870e+00  -3.7342768e+00
   2.4931676e+01  -2.3239751e+01   3.5000000e+02  -4.9555750e-01  -1.5858349e+00  -3.7148478e+00
   2.4841169e+01  -2.3141288e+01   3.5000000e+02  -3.3229410e-01  -1.8153774e+00  -3.6676988e+00
   2.4746020e+01  -2.3046654e+01   3.5000000e+02  -1.7664238e-01  -2.0453041e+00  -3.5931199e+00
   2.4646427e+01  -2.2956035e+01   3.5000000e+02  -3.0050222e-02  -2.2739655e+00  -3.4918271e+00
   2.4542595e+01  -2.2869611e+01   3.5000000e+02   1.0623663e-01  -2.4998155e+00  -3.3649187e+00
   2.4434735e+01  -2.2787553e+01   3.5000000e+02   2.3121287e-01  -2.7214581e+00  -3.2138119e+00
   2.4323068e+01  -2.2710022e+01   3.5000000e+02   3.4414194e-01  -2.9376736e+00  -3.0401697e+00
   2.4207817e+01  -2.2637172e+01   3.5000000e+02   4.4459210e-01  -3.1474422e+00  -2.8458101e+00
   2.4089216e+01  -2.2569145e+01   3.5000000e+02   5.3245004e-01  -3.3499375e+00  -2.6326186e+00
   2.3967500e+01  -2.2506075e+01   3.5000000e+02   6.0794302e-01  -3.5445163e+00  -2.4024498e+00
   2.3842912e+01  -2.2448087e+01   3.5000000e+02   6.7163500e-01  -3.7306729e+00  -2.1570524e+00
   2.3715699e+01  -2.2395293e+01   3.5000000e+02   7.2441671e-01  -3.9079942e+00  -1.8979959e+00
   2.3586111e+01  -2.2347797e+01   3.5000000e+02   7.6748192e-01  -4.0760909e+00  -1.6266327e+00
   2.3454405e+01  -2.2305692e+01   3.5000000e+02   8.0228523e-01  -4.2345278e+00  -1.3440918e+00
   2.3320837e+01  -2.2269060e+01   3.5000000e+02   8.3049613e-01  -4.3827667e+00  -1.0512855e+00
   2.3185671e+01  -2.2237973e+01   3.5000000e+02   8.5393773e-01  -4.5201055e+00  -7.4897659e-01
   2.3049170e+01  -2.2212492e+01   3.5000000e+02   8.7452870e-01  -4.6456551e+00  -4.3783574e-01
   2.2911600e+01  -2.2192666e+01   3.5000000e+02   8.9421872e-01  -4.7583283e+00  -1.1853904e-01
   2.2773229e+01  -2.2178534e+01   3.5000000e+02   9.1493256e-01  -4.8568605e+00   2.0813253e-01
   2.2634327e+01  -2.2170124e+01   3.5000000e+02   9.3851661e-01  -4.9398582e+00   5.4119625e-01
   2.2495164e+01  -2.2167452e+01   3.5000000e+02   9.6669232e-01  -5.0058734e+00   8.7938579e-01
   2.2356011e+01  -2.2170523e+01   3.5000000e+02   1.0010187e+00  -5.0534964e+00   1.2210791e+00
   2.2217137e+01  -2.2179331e+01   3.5000000e+02   1.0428620e+00  -5.0814641e+00   1.5642612e+00
   2.2078813e+01  -2.2193860e+01   3.5000000e+02   1.0933711e+00  -5.0887707e+00   1.9064974e+00
   2.1941309e+01  -2.2214080e+01   3.5000000e+02   1.1534522e+00  -5.0747780e+00   2.2449589e+00
   2.1804892e+01  -2.2239952e+01   3.5000000e+02   1.2237606e+00  -5.0393078e+00   2.5764693e+00
   2.1669828e+01  -2.2271426e+01   3.5000000e+02   1.3046844e+00  -4.9827112e+00   2.8975748e+00
   2.1536382e+01  -2.2308441e+01   3.5000000e+02   1.3963345e+00  -4.9059073e+00   3.2046399e+00
   2.1404814e+01  -2.2350923e+01   3.5000000e+02   1.4985343e+00  -4.8103819e+00   3.4939718e+00
   2.1275383e+01  -2.2398790e+01   3.5000000e+02   1.6108247e+00  -4.6981505e+00   3.7619245e+00
   2.1148344e+01  -2.2451949e+01   3.5000000e+02   1.7324605e+00  -4.5716843e+00   4.0050279e+00
   2.1023948e+01  -2.2510294e+01   3.5000000e+02   1.8624138e+00  -4.4338083e+00   4.2201006e+00
   2.0902441e+01  -2.2573713e+01   3.5000000e+02   1.9994005e+00  -4.2875777e+00   4.4043406e+00
   2.0784065e+01  -2.2642079e+01   3.5000000e+02   2.1418847e+00  -4.1361512e+00   4.5554141e+00
   2.0669056e+01  -2.2715259e+01   3.5000000e+02   2.2881238e+00  -3.9826607e+00   4.6715090e+00
   2.0557645e+01  -2.2793110e+01   3.5000000e+02   2.4361967e+00  -3.8300993e+00   4.7513805e+00
   2.0450059e+01  -2.2875477e+01   3.5000000e+02   2.5840407e+00  -3.6812269e+00   4.7943790e+00
   2.0346514e+01  -2.2962198e+01   3.5000000e+02   2.7295068e+00  -3.5384877e+00   4.8004634e+00
   2.0247223e+01  -2.3053101e+01   3.5000000e+02   2.8704007e+00  -3.4039725e+00   4.7701832e+00
   2.0152390e+01  -2.3148008e+01   3.5000000e+02   3.0045372e+00  -3.2793850e+00   4.7046569e+00
   2.0062213e+01  -2.3246729e+01   3.5000000e+02   3.1297751e+00  -3.1660396e+00   4.6055401e+00
   1.9976880e+01  -2.3349068e+01   3.5000000e+02   3.2440678e+00  -3.0648669e+00   4.4749603e+00
   1.9896571e+01  -2.3454823e+01   3.5000000e+02   3.3454963e+00  -2.9764404e+00   4.3154406e+00
   1.9821459e+01  -2.3563781e+01   3.5000000e+02   3.4322930e+00  -2.9010076e+00   4.1298249e+00
   1.9751705e+01  -2.3675726e+01   3.5000000e+02   3.5028696e+00  -2.8385215e+00   3.9211699e+00
   1.9687464e+01  -2.3790433e+01   3.5000000e+02   3.5558278e+00  -2.7886847e+00   3.6926527e+00
   1.9628877e+01  -2.3907671e+01   3.5000000e+02   3.5899704e+00  -2.7509758e+00   3.4474798e+00
   1.9576078e+01  -2.4027205e+01   3.5000000e+02   3.6043102e+00  -2.7246942e+00   3.1887843e+00
   1.9529189e+01  -2.4148793e+01   3.5000000e+02   3.5980747e+00  -2.7089826e+00   2.9195705e+00
   1.9488322e+01  -2.4272190e+01   3.5000000e+02   3.5707155e+00  -2.7028591e+00   2.6426478e+00
   1.9453576e+01  -2.4397145e+01   3.5000000e+02   3.5219198e+00  -2.7052367e+00   2.3606117e+00
   1.9425041e+01  -2.4523405e+01   3.5000000e+02   3.4516264e+00  -2.7149531e+00   2.0758134e+00
   1.9402792e+01  -2.4650711e+01   3.5000000e+02   3.3600450e+00  -2.7307836e+00   1.7903832e+00
   1.9386895e+01  -2.4778802e+01   3.5000000e+02   3.2476745e+00  -2.7514707e+00   1.5062220e+00
   1.9377401e+01  -2.4907418e+01   3.5000000e+02   3.1153112e+00  -2.7757385e+00   1.2250216e+00
   1.9374351e+01  -2.5036291e+01   3.5000000e+02   2.9640625e+00  -2.8023139e+00   9.4829195e-01
   1.9377770e+01  -2.5165157e+01   3.5000000e+02   2.7953222e+00  -2.8299395e+00   6.7735493e-01
   1.9387672e+01  -2.5293749e+01   3.5000000e+02   2.6107487e+00  -2.8573890e+00   4.1335452e-01
   1.9404057e+01  -2.5421799e+01   3.5000000e+02   2.4122135e+00  -2.8834714e+00   1.5725549e-01
   1.9426911e+01  -2.5549041e+01   3.5000000e+02   2.2017296e+00  -2.9070323e+00  -9.0166271e-02
   1.9456209e+01  -2.5675208e+01   3.5000000e+02   1.9813761e+00  -2.9269524e+00  -3.2832707e-01
   1.9491908e+01  -2.5800036e+01   3.5000000e+02   1.7532067e+00  -2.9421330e+00  -5.5682261e-01
   1.9533954e+01  -2.5923262e+01   3.5000000e+02   1.5191724e+00  -2.9514928e+00  -7.7542340e-01
   1.9714474e+01  -2.6573850e+01   3.5000000e+02   2.4610713e-01  -2.8154024e+00  -1.4774942e+00
   1.9792084e+01  -2.6681696e+01   3.5000000e+02   1.5062202e-02  -2.7775591e+00  -1.6286874e+00
   1.9874991e+01  -2.6786394e+01   3.5000000e+02  -2.1394546e-01  -2.7278071e+00  -1.7707747e+00
   1.9963048e+01  -2.6887738e+01   3.5000000e+02  -4.4033408e-01  -2.6655071e+00  -1.9034834e+00
   2.0056096e+01  -2.6985528e+01   3.5000000e+02  -6.6343824e-01  -2.5901612e+00  -2.0264068e+00
   2.0153966e+01  -2.7079572e+01   3.5000000e+02  -8.8247370e-01  -2.5014267e+00  -2.1390237e+00
   2.0256476e+01  -2.7169685e+01   3.5000000e+02  -1.0965179e+00  -2.3991218e+00  -2.2407174e+00
   2.0363436e+01  -2.7255686e+01   3.5000000e+02  -1.3045175e+00  -2.2832222e+00  -2.3308105e+00
   2.0474643e+01  -2.7337406e+01   3.5000000e+02  -1.5053296e+00  -2.1538452e+00  -2.4085688e+00
   2.0589885e+01  -2.7414681e+01   3.5000000e+02  -1.6977608e+00  -2.0112402e+00  -2.4732241e+00
   2.0708943e+01  -2.7487358e+01   3.5000000e+02  -1.8806357e+00  -1.8557709e+00  -2.5239719e+00
   2.0831584e+01  -2.7555290e+01   3.5000000e+02  -2.0528442e+00  -1.6879233e+00  -2.5599660e+00
   2.0957571e+01  -2.7618341e+01   3.5000000e+02  -2.2134111e+00  -1.5083030e+00  -2.5803224e+00
   2.1086657e+01  -2.7676384e+01   3.5000000e+02  -2.3615364e+00  -1.3176636e+00  -2.5841187e+00
   2.1218587e+01  -2.7729303e+01   3.5000000e+02  -2.4966355e+00  -1.1169371e+00  -2.5704120e+00
   2.1353099e+01  -2.7776990e+01   3.5000000e+02  -2.6183599e+00  -9.0727402e-01  -2.5382794e+00
   2.1489926e+01  -2.7819350e+01   3.5000000e+02  -2.7266175e+00  -6.9007782e-01  -2.4868649e+00
   2.1628795e+01  -2.7856296e+01   3.5000000e+02  -2.8215675e+00  -4.6704298e-01  -2.4154597e+00
   2.1769425e+01  -2.7887753e+01   3.5000000e+02  -2.9036169e+00  -2.4017560e-01  -2.3235834e+00
   2.1911535e+01  -2.7913657e+01   3.5000000e+02  -2.9734046e+00  -1.1780624e-02  -2.2110815e+00
   2.2054838e+01  -2.7933957e+01   3.5000000e+02  -3.0317736e+00   2.1555877e-01  -2.0782180e+00
   2.2199043e+01  -2.7948610e+01   3.5000000e+02  -3.0797348e+00   4.3904200e-01  -1.9257727e+00
   2.2343859e+01  -2.7957588e+01   3.5000000e+02  -3.1184304e+00   6.5575097e-01  -1.7550896e+00
   2.2488992e+01  -2.7960870e+01   3.5000000e+02  -3.1490827e+00   8.6276147e-01  -1.5681283e+00
   2.2634147e+01  -2.7958452e+01   3.5000000e+02  -3.1729482e+00   1.0572859e+00  -1.3674332e+00
   2.2779029e+01  -2.7950337e+01   3.5000000e+02  -3.1912659e+00   1.2368146e+00  -1.1560994e+00
   2.2923346e+01  -2.7936543e+01   3.5000000e+02  -3.2052135e+00   1.3992540e+00  -9.3765064e-01
   2.3066804e+01  -2.7917097e+01   3.5000000e+02  -3.2158672e+00   1.5430260e+00  -7.1592229e-01
   2.3209114e+01  -2.7892039e+01   3.5000000e+02  -3.2241740e+00   1.6671475e+00  -4.9487876e-01
   2.3349987e+01  -2.7861420e+01   3.5000000e+02  -3.2309330e+00   1.7712489e+00  -2.7845557e-01
   2.3489141e+01  -2.7825302e+01   3.5000000e+02  -3.2367902e+00   1.8555594e+00  -7.0383738e-02
   2.3626295e+01  -2.7783759e+01   3.5000000e+02  -3.2422423e+00   1.9208401e+00   1.2593767e-01
   2.3761176e+01  -2.7736873e+01   3.5000000e+02  -3.2476510e+00   1.9682958e+00   3.0754872e-01
   2.3893514e+01  -2.7684741e+01   3.5000000e+02  -3.2532603e+00   1.9994605e+00   4.7199433e-01
   2.4023048e+01  -2.7627467e+01   3.5000000e+02  -3.2592189e+00   2.0160840e+00   6.1733932e-01
   2.4149521e+01  -2.7565168e+01   3.5000000e+02  -3.2655997e+00   2.0200191e+00   7.4215653e-01
   2.4272685e+01  -2.7497967e+01   3.5000000e+02  -3.2724192e+00   2.0131275e+00   8.4548047e-01
   2.4392301e+01  -2.7426001e+01   3.5000000e+02  -3.2796483e+00   1.9972000e+00   9.2676759e-01
   2.4508136e+01  -2.7349414e+01   3.5000000e+02  -3.2872222e+00   1.9739006e+00   9.8580945e-01
   2.4619969e+01  -2.7268357e+01   3.5000000e+02  -3.2950427e+00   1.9447256e+00   1.0226805e+00
   2.4727586e+01  -2.7182994e+01   3.5000000e+02  -3.3029744e+00   1.9109809e+00   1.0376828e+00
   2.4830783e+01  -2.7093494e+01   3.5000000e+02  -3.3108399e+00   1.8737716e+00   1.0312844e+00
   2.4929369e+01  -2.7000034e+01   3.5000000e+02  -3.3184080e+00   1.8339978e+00   1.0040916e+00
   2.5023159e+01  -2.6902800e+01   3.5000000e+02  -3.3253825e+00   1.7923637e+00   9.5680926e-01
   2.5111984e+01  -2.6801982e+01   3.5000000e+02  -3.3313885e+00   1.7493838e+00   8.9022778e-01
   2.5195681e+01  -2.6697780e+01   3.5000000e+02  -3.3359616e+00   1.7054030e+00   8.0520814e-01
   2.5274103e+01  -2.6590398e+01   3.5000000e+02  -3.3385410e+00   1.6606097e+00   7.0268290e-01
   2.5347112e+01  -2.6480045e+01   3.5000000e+02  -3.3384692e+00   1.6150594e+00   5.8364935e-01
   2.5414581e+01  -2.6366936e+01   3.5000000e+02  -3.3350013e+00   1.5686937e+00   4.4918190e-01
   2.5476398e+01  -2.6251292e+01   3.5000000e+02  -3.3273249e+00   1.5213570e+00   3.0044564e-01
   2.5532459e+01  -2.6133336e+01   3.5000000e+02  -3.3145885e+00   1.4728152e+00   1.3868109e-01
   2.5582675e+01  -2.6013296e+01   3.5000000e+02  -3.2959387e+00   1.4227620e+00  -3.4779318e-02
   2.5626968e+01  -2.5891402e+01   3.5000000e+02  -3.2705600e+00   1.3708271e+00  -2.1853262e-01
   2.5665272e+01  -2.5767889e+01   3.5000000e+02  -3.2377134e+00   1.3165762e+00  -4.1111383e-01
   2.5697533e+01  -2.5642992e+01   3.5000000e+02  -3.1967675e+00   1.2595083e+00  -6.1102849e-01
   2.5723708e+01  -2.5516949e+01   3.5000000e+02  -3.1472195e+00   1.1990520e+00  -8.1677239e-01
   2.5743768e+01  -2.5390000e+01   3.5000000e+02  -3.0887049e+00   1.1345622e+00  -1.0268515e+00
   2.5757695e+01  -2.5262384e+01   3.5000000e+02  -3.0209899e+00   1.0653192e+00  -1.2398064e+00
   2.5765480e+01  -2.5134343e+01   3.5000000e+02  -2.9439571e+00   9.9053716e-01  -1.4542099e+00
   2.5767130e+01  -2.5006116e+01   3.5000000e+02  -2.8575831e+00   9.0937178e-01  -1.6686565e+00
   2.5762661e+01  -2.4877945e+01   3.5000000e+02  -2.7619172e+00   8.2094674e-01  -1.8817351e+00
   2.5752099e+01  -2.4750069e+01   3.5000000e+02  -2.6570607e+00   7.2437919e-01  -2.0919997e+00
   2.5735483e+01  -2.4622726e+01   3.5000000e+02  -2.5431637e+00   6.1881833e-01  -2.2979189e+00
   2.5712863e+01  -2.4496152e+01   3.5000000e+02  -2.4204314e+00   5.0348894e-01  -2.4978389e+00
   2.5684298e+01  -2.4370582e+01   3.5000000e+02  -2.2891446e+00   3.7773889e-01  -2.6899544e+00
   2.5649858e+01  -2.4246248e+01   3.5000000e+02  -2.1496921e+00   2.4108407e-01  -2.8722993e+00
   2.5609623e+01  -2.4123378e+01   3.5000000e+02  -2.0026056e+00   9.3248852e-02  -3.0427618e+00
   2.5563683e+01  -2.4002198e+01   3.5000000e+02  -1.8485952e+00  -6.5798821e-02  -3.1991232e+00
   2.5512139e+01  -2.3882929e+01   3.5000000e+02  -1.6885725e+00  -2.3582876e-01  -3.3391232e+00
   2.5455099e+01  -2.3765790e+01   3.5000000e+02  -1.5236559e+00  -4.1633986e-01  -3.4605411e+00
   2.5392680e+01  -2.3650995e+01   3.5000000e+02  -1.3551604e+00  -6.0656978e-01  -3.5612840e+00
   2.5325011e+01  -2.3538751e+01   3.5000000e+02  -1.1845720e+00  -8.0551498e-01  -3.6394728e+00
   2.5252227e+01  -2.3429262e+01   3.5000000e+02  -1.0135034e+00  -1.0119608e+00  -3.6935194e+00
   2.5174470e+01  -2.3322726e+01   3.5000000e+02  -8.4364383e-01  -1.2245239e+00  -3.7221889e+00
   2.5091893e+01  -2.3219335e+01   3.5000000e+02  -6.7671262e-01  -1.4416936e+00  -3.7246407e+00
   2.5004655e+01  -2.3119276e+01   3.5000000e+02  -5.1440415e-01  -1.6618818e+00  -3.7004545e+00
   2.4912921e+01  -2.3022729e+01   3.5000000e+02  -3.5834098e-01  -1.8834766e+00  -3.6496356e+00
   2.4816865e+01  -2.2929866e+01   3.5000000e+02  -2.1003626e-01  -2.1048881e+00  -3.5726027e+00
   2.4716668e+01  -2.2840855e+01   3.5000000e+02  -7.0855727e-02  -2.3245941e+00  -3.4701637e+00
   2.4612515e+01  -2.2755854e+01   3.5000000e+02   5.8022694e-02  -2.5411945e+00  -3.3434685e+00
   2.4504600e+01  -2.2675015e+01   3.5000000e+02   1.7563486e-01  -2.7534385e+00  -3.1939566e+00
   2.4393119e+01  -2.2598482e+01   3.5000000e+02   2.8126936e-01  -2.9602644e+00  -3.0232799e+00
   2.4278276e+01  -2.2526391e+01   3.5000000e+02   3.7448946e-01  -3.1608075e+00  -2.8332259e+00
   2.4160281e+01  -2.2458871e+01   3.5000000e+02   4.5515825e-01  -3.3544020e+00  -2.6256286e+00
   2.4039345e+01  -2.2396042e+01   3.5000000e+02   5.2345694e-01  -3.5405703e+00  -2.4022716e+00
   2.3915687e+01  -2.2338014e+01   3.5000000e+02   5.7988235e-01  -3.7189783e+00  -2.1648139e+00
   2.3789528e+01  -2.2284891e+01   3.5000000e+02   6.2524373e-01  -3.8893865e+00  -1.9147191e+00
   2.3661093e+01  -2.2236767e+01   3.5000000e+02   6.6063797e-01  -4.0515850e+00  -1.6532107e+00
   2.3530612e+01  -2.2193726e+01   3.5000000e+02   6.8741414e-01  -4.2053214e+00  -1.3812587e+00
   2.3398314e+01  -2.2155846e+01   3.5000000e+02   7.0713394e-01  -4.3502366e+00  -1.0995872e+00
   2.3264435e+01  -2.2123192e+01   3.5000000e+02   7.2151134e-01  -4.4858013e+00  -8.0872753e-01
   2.3129212e+01  -2.2095823e+01   3.5000000e+02   7.3236476e-01  -4.6112786e+00  -5.0908285e-01
   2.2992881e+01  -2.2073786e+01   3.5000000e+02   7.4155637e-01  -4.7257091e+00  -2.0100706e-01
   2.2855685e+01  -2.2057121e+01   3.5000000e+02   7.5094202e-01  -4.8279116e+00   1.1507610e-01
   2.2717864e+01  -2.2045857e+01   3.5000000e+02   7.6232209e-01  -4.9165269e+00   4.3859752e-01
   2.2579660e+01  -2.2040014e+01   3.5000000e+02   7.7740111e-01  -4.9900738e+00   7.6873831e-01
   2.2441316e+01  -2.2039602e+01   3.5000000e+02   7.9775274e-01  -5.0470320e+00   1.1043547e+00
   2.2303075e+01  -2.2044622e+01   3.5000000e+02   8.2479360e-01  -5.0859415e+00   1.4439232e+00
   2.2165180e+01  -2.2055065e+01   3.5000000e+02   8.5976018e-01  -5.1055103e+00   1.7855100e+00
   2.2027873e+01  -2.2070913e+01   3.5000000e+02   9.0369304e-01  -5.1047245e+00   2.1267698e+00
   2.1891396e+01  -2.2092137e+01   3.5000000e+02   9.5741960e-01  -5.0829492e+00   2.4649711e+00
   2.1755989e+01  -2.2118700e+01   3.5000000e+02   1.0215475e+00  -5.0400143e+00   2.7970530e+00
   2.1621891e+01  -2.2150556e+01   3.5000000e+02   1.0964530e+00  -4.9762739e+00   3.1197003e+00
   2.1489339e+01  -2.2187648e+01   3.5000000e+02   1.1822692e+00  -4.8926356e+00   3.4294440e+00
   2.1358566e+01  -2.2229911e+01   3.5000000e+02   1.2788843e+00  -4.7905524e+00   3.7227704e+00
   2.1229806e+01  -2.2277270e+01   3.5000000e+02   1.3859329e+00  -4.6719847e+00   3.9962208e+00
   2.1103288e+01  -2.2329641e+01   3.5000000e+02   1.5027973e+00  -4.5393231e+00   4.2465117e+00
   2.0979236e+01  -2.2386931e+01   3.5000000e+02   1.6286103e+00  -4.3952887e+00   4.4706307e+00
   2.0857874e+01  -2.2449039e+01   3.5000000e+02   1.7622649e+00  -4.2428241e+00   4.6659054e+00
   2.0739418e+01  -2.2515856e+01   3.5000000e+02   1.9024298e+00  -4.0849644e+00   4.8300857e+00
   2.0624084e+01  -2.2587261e+01   3.5000000e+02   2.0475614e+00  -3.9247307e+00   4.9613809e+00
   2.0512081e+01  -2.2663129e+01   3.5000000e+02   2.1959475e+00  -3.7650158e+00   5.0584972e+00
   2.0403611e+01  -2.2743324e+01   3.5000000e+02   2.3457267e+00  -3.6084977e+00   5.1206651e+00
   2.0298876e+01  -2.2827704e+01   3.5000000e+02   2.4949355e+00  -3.4575831e+00   5.1476271e+00
   2.0198066e+01  -2.2916117e+01   3.5000000e+02   2.6415410e+00  -3.3143455e+00   5.1396620e+00
   2.0101371e+01  -2.3008406e+01   3.5000000e+02   2.7834922e+00  -3.1805188e+00   5.0975402e+00
   2.0008971e+01  -2.3104406e+01   3.5000000e+02   2.9187545e+00  -3.0574765e+00   5.0225190e+00
   1.9921040e+01  -2.3203944e+01   3.5000000e+02   3.0453482e+00  -2.9462452e+00   4.9162978e+00
   1.9837745e+01  -2.3306841e+01   3.5000000e+02   3.1613853e+00  -2.8475229e+00   4.7809638e+00
   1.9759248e+01  -2.3412912e+01   3.5000000e+02   3.2650982e+00  -2.7617086e+00   4.6189258e+00
   1.9685700e+01  -2.3521966e+01   3.5000000e+02   3.3548606e+00  -2.6889240e+00   4.4328479e+00
   1.9617246e+01  -2.3633805e+01   3.5000000e+02   3.4292047e+00  -2.6290533e+00   4.2255658e+00
   1.9554023e+01  -2.3748227e+01   3.5000000e+02   3.4868346e+00  -2.5817718e+00   3.9999975e+00
   1.9496160e+01  -2.3865024e+01   3.5000000e+02   3.5266318e+00  -2.5465747e+00   3.7590690e+00
   1.9443775e+01  -2.3983984e+01   3.5000000e+02   3.5476606e+00  -2.5227998e+00   3.5056406e+00
   1.9396979e+01  -2.4104888e+01   3.5000000e+02   3.5491731e+00  -2.5096540e+00   3.2424504e+00
   1.9355873e+01  -2.4227516e+01   3.5000000e+02   3.5306173e+00  -2.5062326e+00   2.9720582e+00
   1.9320549e+01  -2.4351643e+01   3.5000000e+02   3.4916456e+00  -2.5115368e+00   2.6968299e+00
   1.9291088e+01  -2.4477041e+01   3.5000000e+02   3.4321292e+00  -2.5244895e+00   2.4189246e+00
   1.9267562e+01  -2.4603478e+01   3.5000000e+02   3.3521767e+00  -2.5439557e+00   2.1402986e+00
   1.9250032e+01  -2.4730719e+01   3.5000000e+02   3.2521529e+00  -2.5687586e+00   1.8627183e+00
   1.9238550e+01  -2.4858530e+01   3.5000000e+02   3.1326923e+00  -2.5977023e+00   1.5877627e+00
   1.9233154e+01  -2.4986671e+01   3.5000000e+02   2.9947128e+00  -2.6295818e+00   1.3168642e+00
   1.9233875e+01  -2.5114905e+01   3.5000000e+02   2.8394069e+00  -2.6632121e+00   1.0512846e+00
   1.9240730e+01  -2.5242990e+01   3.5000000e+02   2.6682306e+00  -2.6974308e+00   7.9214746e-01
   1.9253725e+01  -2.5370685e+01   3.5000000e+02   2.4828616e+00  -2.7311148e+00   5.4041456e-01
   1.9272856e+01  -2.5497751e+01   3.5000000e+02   2.2851434e+00  -2.7631851e+00   2.9687452e-01
   1.9298106e+01  -2.5623947e+01   3.5000000e+02   2.0770222e+00  -2.7926022e+00   6.2145773e-02
   1.9329446e+01  -2.5749033e+01   3.5000000e+02   1.8604646e+00  -2.8183626e+00  -1.6333609e-01
   1.9366837e+01  -2.5872771e+01   3.5000000e+02   1.6373761e+00  -2.8394902e+00  -3.7931967e-01
   1.9410225e+01  -2.5994925e+01   3.5000000e+02   1.4095277e+00  -2.8550213e+00  -5.8571113e-01
   1.9459548e+01  -2.6115262e+01   3.5000000e+02   1.1784958e+00  -2.8640008e+00  -7.8255921e-01
   1.9514729e+01  -2.6233549e+01   3.5000000e+02   9.4563284e-01  -2.8654726e+00  -9.6999652e-01
   1.9575679e+01  -2.6349558e+01   3.5000000e+02   7.1204978e-01  -2.8584837e+00  -1.1481988e+00
   1.9642298e+01  -2.6463065e+01   3.5000000e+02   4.7863668e-01  -2.8420954e+00  -1.3173309e+00
   1.9948419e+01  -2.7071110e+01   3.5000000e+02  -7.3775591e-01  -2.5461003e+00  -1.7801916e+00
   2.0046386e+01  -2.7165472e+01   3.5000000e+02  -9.5095629e-01  -2.4673563e+00  -1.8878810e+00
   2.0148837e+01  -2.7256058e+01   3.5000000e+02  -1.1597021e+00  -2.3757681e+00  -1.9857127e+00
   2.0255598e+01  -2.7342702e+01   3.5000000e+02  -1.3629698e+00  -2.2712933e+00  -2.0730910e+00
   2.0366482e+01  -2.7425244e+01   3.5000000e+02  -1.5596188e+00  -2.1540101e+00  -2.1493762e+00
   2.0481296e+01  -2.7503533e+01   3.5000000e+02  -1.7484493e+00  -2.0240958e+00  -2.2139009e+00
   2.0599836e+01  -2.7577424e+01   3.5000000e+02  -1.9282521e+00  -1.8818166e+00  -2.2659626e+00
   2.0721891e+01  -2.7646780e+01   3.5000000e+02  -2.0978742e+00  -1.7275185e+00  -2.3048167e+00
   2.0847241e+01  -2.7711473e+01   3.5000000e+02  -2.2562744e+00  -1.5616334e+00  -2.3296606e+00
   2.0975661e+01  -2.7771382e+01   3.5000000e+02  -2.4025702e+00  -1.3846969e+00  -2.3396325e+00
   2.1106917e+01  -2.7826395e+01   3.5000000e+02  -2.5360749e+00  -1.1973831e+00  -2.3338081e+00
   2.1240769e+01  -2.7876411e+01   3.5000000e+02  -2.6563271e+00  -1.0005424e+00  -2.3112193e+00
   2.1376971e+01  -2.7921334e+01   3.5000000e+02  -2.7631000e+00  -7.9525201e-01  -2.2709045e+00
   2.1515271e+01  -2.7961082e+01   3.5000000e+02  -2.8564166e+00  -5.8285549e-01  -2.2119515e+00
   2.1655413e+01  -2.7995579e+01   3.5000000e+02  -2.9365416e+00  -3.6499987e-01  -2.1335912e+00
   2.1797138e+01  -2.8024762e+01   3.5000000e+02  -3.0039778e+00  -1.4365008e-01  -2.0352745e+00
   2.1940180e+01  -2.8048574e+01   3.5000000e+02  -3.0594430e+00   7.8905711e-02  -1.9167880e+00
   2.2084271e+01  -2.8066971e+01   3.5000000e+02  -3.1038526e+00   3.0009869e-01  -1.7783382e+00
   2.2229144e+01  -2.8079920e+01   3.5000000e+02  -3.1382858e+00   5.1714699e-01  -1.6206407e+00
   2.2374524e+01  -2.8087394e+01   3.5000000e+02  -3.1639440e+00   7.2713720e-01  -1.4450036e+00
   2.2520141e+01  -2.8089380e+01   3.5000000e+02  -3.1821117e+00   9.2716810e-01  -1.2533324e+00
   2.2665719e+01  -2.8085875e+01   3.5000000e+02  -3.1941052e+00   1.1144740e+00  -1.0481407e+00
   2.2810986e+01  -2.8076885e+01   3.5000000e+02  -3.2012255e+00   1.2865830e+00  -8.3248405e-01
   2.2955670e+01  -2.8062427e+01   3.5000000e+02  -3.2047115e+00   1.4414444e+00  -6.0985916e-01
   2.3099498e+01  -2.8042528e+01   3.5000000e+02  -3.2057008e+00   1.5775343e+00  -3.8407012e-01
   2.3242202e+01  -2.8017226e+01   3.5000000e+02  -3.2051976e+00   1.6939302e+00  -1.5905201e-01
   2.3383515e+01  -2.7986567e+01   3.5000000e+02  -3.2040534e+00   1.7903292e+00   6.1286951e-02
   2.3523174e+01  -2.7950611e+01   3.5000000e+02  -3.2029566e+00   1.8670275e+00   2.7324585e-01
   2.3660920e+01  -2.7909424e+01   3.5000000e+02  -3.2024369e+00   1.9248565e+00   4.7345150e-01
   2.3796496e+01  -2.7863083e+01   3.5000000e+02  -3.2028760e+00   1.9650885e+00   6.5896677e-01
   2.3929654e+01  -2.7811676e+01   3.5000000e+02  -3.2045249e+00   1.9893270e+00   8.2736660e-01
   2.4060150e+01  -2.7755298e+01   3.5000000e+02  -3.2075275e+00   1.9993880e+00   9.7673984e-01
   2.4187744e+01  -2.7694055e+01   3.5000000e+02  -3.2119412e+00   1.9971904e+00   1.1056840e+00
   2.4312205e+01  -2.7628060e+01   3.5000000e+02  -3.2177583e+00   1.9846592e+00   1.2132661e+00
   2.4433310e+01  -2.7557436e+01   3.5000000e+02  -3.2249205e+00   1.9636470e+00   1.2989693e+00
   2.4550840e+01  -2.7482315e+01   3.5000000e+02  -3.2333322e+00   1.9358773e+00   1.3626172e+00
   2.4664587e+01  -2.7402835e+01   3.5000000e+02  -3.2428669e+00   1.9029035e+00   1.4043152e+00
   2.4774350e+01  -2.7319142e+01   3.5000000e+02  -3.2533683e+00   1.8660857e+00   1.4243863e+00
   2.4879937e+01  -2.7231392e+01   3.5000000e+02  -3.2646466e+00   1.8265779e+00   1.4233264e+00
   2.4981165e+01  -2.7139745e+01   3.5000000e+02  -3.2764735e+00   1.7853267e+00   1.4017485e+00
   2.5077861e+01  -2.7044369e+01   3.5000000e+02  -3.2885700e+00   1.7430733e+00   1.3603598e+00
   2.5169861e+01  -2.6945437e+01   3.5000000e+02  -3.3005950e+00   1.7003643e+00   1.2999286e+00
   2.5257010e+01  -2.6843131e+01   3.5000000e+02  -3.3121305e+00   1.6575648e+00   1.2212788e+00
   2.5339165e+01  -2.6737636e+01   3.5000000e+02  -3.3226712e+00   1.6148753e+00   1.1252738e+00
   2.5416191e+01  -2.6629143e+01   3.5000000e+02  -3.3316168e+00   1.5723536e+00   1.0128181e+00
   2.5487966e+01  -2.6517847e+01   3.5000000e+02  -3.3382716e+00   1.5299350e+00   8.8486686e-01
   2.5554375e+01  -2.6403948e+01   3.5000000e+02  -3.3418545e+00   1.4874578e+00   7.4242995e-01
   2.5615318e+01  -2.6287652e+01   3.5000000e+02  -3.3415197e+00   1.4446790e+00   5.8659702e-01
   2.5670702e+01  -2.6169165e+01   3.5000000e+02  -3.3363868e+00   1.4012960e+00   4.1852124e-01
   2.5720446e+01  -2.6048698e+01   3.5000000e+02  -3.3255795e+00   1.3569543e+00   2.3943930e-01
   2.5764481e+01  -2.5926466e+01   3.5000000e+02  -3.3082675e+00   1.3112540e+00   5.0662552e-02
   2.5802745e+01  -2.5802684e+01   3.5000000e+02  -3.2837047e+00   1.2637520e+00  -1.4645368e-01
   2.5835191e+01  -2.5677571e+01   3.5000000e+02  -3.2512636e+00   1.2139547e+00  -3.5051345e-01
   2.5861780e+01  -2.5551347e+01   3.5000000e+02  -3.2104543e+00   1.1613146e+00  -5.6012249e-01
   2.5882485e+01  -2.5424232e+01   3.5000000e+02  -3.1609319e+00   1.1052222e+00  -7.7390988e-01
   2.5897288e+01  -2.5296449e+01   3.5000000e+02  -3.1024891e+00   1.0450033e+00  -9.9054503e-01
   2.5906183e+01  -2.5168220e+01   3.5000000e+02  -3.0350364e+00   9.7991744e-01  -1.2087489e+00
   2.5909172e+01  -2.5039767e+01   3.5000000e+02  -2.9585729e+00   9.0916483e-01  -1.4272898e+00
   2.5906269e+01  -2.4911313e+01   3.5000000e+02  -2.8731591e+00   8.3190040e-01  -1.6449539e+00
   2.5897498e+01  -2.4783078e+01   3.5000000e+02  -2.7788890e+00   7.4725424e-01  -1.8605173e+00
   2.5882891e+01  -2.4655284e+01   3.5000000e+02  -2.6758768e+00   6.5436554e-01  -2.0726943e+00
   2.5862492e+01  -2.4528148e+01   3.5000000e+02  -2.5642549e+00   5.5241556e-01  -2.2800953e+00
   2.5836353e+01  -2.4401889e+01   3.5000000e+02  -2.4441922e+00   4.4067606e-01  -2.4811798e+00
   2.5804534e+01  -2.4276721e+01   3.5000000e+02  -2.3159193e+00   3.1854844e-01  -2.6742404e+00
   2.5767107e+01  -2.4152857e+01   3.5000000e+02  -2.1797744e+00   1.8561094e-01  -2.8573886e+00
   2.5724151e+01  -2.4030507e+01   3.5000000e+02  -2.0362396e+00   4.1653411e-02  -3.0285857e+00
   2.5675754e+01  -2.3909876e+01   3.5000000e+02  -1.8859769e+00  -1.1329685e-01  -3.1856896e+00
   2.5622011e+01  -2.3791169e+01   3.5000000e+02  -1.7298531e+00  -2.7895503e-01  -3.3265205e+00
   2.5563027e+01  -2.3674584e+01   3.5000000e+02  -1.5689429e+00  -4.5478252e-01  -3.4489460e+00
   2.5498915e+01  -2.3560318e+01   3.5000000e+02  -1.4045189e+00  -6.3999140e-01  -3.5509643e+00
   2.5429794e+01  -2.3448561e+01   3.5000000e+02  -1.2380154e+00  -8.3357498e-01  -3.6307905e+00
   2.5355792e+01  -2.3339499e+01   3.5000000e+02  -1.0709935e+00  -1.0343330e+00  -3.6869225e+00
   2.5277042e+01  -2.3233315e+01   3.5000000e+02  -9.0509029e-01  -1.2409109e+00  -3.7181974e+00
   2.5193686e+01  -2.3130184e+01   3.5000000e+02  -7.4197229e-01  -1.4518440e+00  -3.7238290e+00
   2.5105873e+01  -2.3030278e+01   3.5000000e+02  -5.8329175e-01  -1.6655964e+00  -3.7034298e+00
   2.5013755e+01  -2.2933761e+01   3.5000000e+02  -4.3063806e-01  -1.8806171e+00  -3.6570158e+00
   2.4917495e+01  -2.2840793e+01   3.5000000e+02  -2.8551254e-01  -2.0953722e+00  -3.5850007e+00
   2.4817258e+01  -2.2751528e+01   3.5000000e+02  -1.4928286e-01  -2.3084024e+00  -3.4881718e+00
   2.4713215e+01  -2.2666113e+01   3.5000000e+02  -2.3154540e-02  -2.5183630e+00  -3.3676539e+00
   2.4605544e+01  -2.2584686e+01   3.5000000e+02   9.1860624e-02  -2.7240636e+00  -3.2248588e+00
   2.4494428e+01  -2.2507383e+01   3.5000000e+02   1.9497751e-01  -2.9244944e+00  -3.0614235e+00
   2.4380052e+01  -2.2434330e+01   3.5000000e+02   2.8567179e-01  -3.1188586e+00  -2.8791245e+00
   2.4262609e+01  -2.2365647e+01   3.5000000e+02   3.6369959e-01  -3.3065660e+00  -2.6797990e+00
   2.4142293e+01  -2.2301445e+01   3.5000000e+02   4.2912133e-01  -3.4872315e+00  -2.4652437e+00
   2.4019305e+01  -2.2241829e+01   3.5000000e+02   4.8230568e-01  -3.6606339e+00  -2.2371374e+00
   2.3893846e+01  -2.2186898e+01   3.5000000e+02   5.2393078e-01  -3.8266749e+00  -1.9969562e+00
   2.3766125e+01  -2.2136739e+01   3.5000000e+02   5.5495990e-01  -3.9853084e+00  -1.7459244e+00
   2.3636349e+01  -2.2091435e+01   3.5000000e+02   5.7662011e-01  -4.1364738e+00  -1.4849775e+00
   2.3504731e+01  -2.2051060e+01   3.5000000e+02   5.9035598e-01  -4.2800148e+00  -1.2147720e+00
   2.3371486e+01  -2.2015679e+01   3.5000000e+02   5.9778295e-01  -4.4156153e+00  -9.3571232e-01
   2.3236830e+01  -2.1985350e+01   3.5000000e+02   6.0063643e-01  -4.5427447e+00  -6.4801081e-01
   2.3100982e+01  -2.1960121e+01   3.5000000e+02   6.0071556e-01  -4.6606238e+00  -3.5177303e-01
   2.2964163e+01  -2.1940034e+01   3.5000000e+02   5.9983662e-01  -4.7682163e+00  -4.7096810e-02
   2.2826593e+01  -2.1925122e+01   3.5000000e+02   5.9978485e-01  -4.8642501e+00   2.6583250e-01
   2.2688496e+01  -2.1915408e+01   3.5000000e+02   6.0227262e-01  -4.9472580e+00   5.8663040e-01
   2.2550094e+01  -2.1910909e+01   3.5000000e+02   6.0891219e-01  -5.0156511e+00   9.1463375e-01
   2.2411611e+01  -2.1911631e+01   3.5000000e+02   6.2118312e-01  -5.0678052e+00   1.2488218e+00
   2.2273271e+01  -2.1917574e+01   3.5000000e+02   6.4041868e-01  -5.1021645e+00   1.5877682e+00
   2.2135297e+01  -2.1928727e+01   3.5000000e+02   6.6778366e-01  -5.1173530e+00   1.9296225e+00
   2.1997912e+01  -2.1945073e+01   3.5000000e+02   7.0426921e-01  -5.1122825e+00   2.2721108e+00
   2.1861340e+01  -2.1966586e+01   3.5000000e+02   7.5067859e-01  -5.0862539e+00   2.6125674e+00
   2.1725799e+01  -2.1993229e+01   3.5000000e+02   8.0761517e-01  -5.0390379e+00   2.9480133e+00
   2.1591512e+01  -2.2024961e+01   3.5000000e+02   8.7548489e-01  -4.9709344e+00   3.2752058e+00
   2.1458695e+01  -2.2061730e+01   3.5000000e+02   9.5447772e-01  -4.8827941e+00   3.5907695e+00
   2.1327566e+01  -2.2103475e+01   3.5000000e+02   1.0445625e+00  -4.7760139e+00   3.8912780e+00
   2.1198337e+01  -2.2150129e+01   3.5000000e+02   1.1454870e+00  -4.6524889e+00   4.1733784e+00
   2.1071220e+01  -2.2201616e+01   3.5000000e+02   1.2567683e+00  -4.5145436e+00   4.4338776e+00
   2.0946424e+01  -2.2257853e+01   3.5000000e+02   1.3776955e+00  -4.3648332e+00   4.6698365e+00
   2.0824155e+01  -2.2318747e+01   3.5000000e+02   1.5073273e+00  -4.2062321e+00   4.8786444e+00
   2.0704614e+01  -2.2384199e+01   3.5000000e+02   1.6445088e+00  -4.0417154e+00   5.0580757e+00
   2.0588000e+01  -2.2454103e+01   3.5000000e+02   1.7878837e+00  -3.8742500e+00   5.2063224e+00
   2.0474506e+01  -2.2528343e+01   3.5000000e+02   1.9359095e+00  -3.7066898e+00   5.3220314e+00
   2.0364324e+01  -2.2606800e+01   3.5000000e+02   2.0868978e+00  -3.5416995e+00   5.4043001e+00
   2.0257639e+01  -2.2689343e+01   3.5000000e+02   2.2390283e+00  -3.3816831e+00   5.4527036e+00
   2.0154632e+01  -2.2775838e+01   3.5000000e+02   2.3904020e+00  -3.2287459e+00   5.4672741e+00
   2.0055477e+01  -2.2866142e+01   3.5000000e+02   2.5390671e+00  -3.0846661e+00   5.4485042e+00
   1.9960346e+01  -2.2960106e+01   3.5000000e+02   2.6830631e+00  -2.9508965e+00   5.3973176e+00
   1.9869404e+01  -2.3057577e+01   3.5000000e+02   2.8204598e+00  -2.8285635e+00   5.3150461e+00
   1.9782808e+01  -2.3158392e+01   3.5000000e+02   2.9493808e+00  -2.7184817e+00   5.2034074e+00
   1.9700711e+01  -2.3262384e+01   3.5000000e+02   3.0680435e+00  -2.6211845e+00   5.0644421e+00
   1.9623261e+01  -2.3369382e+01   3.5000000e+02   3.1747825e+00  -2.5369506e+00   4.9004586e+00
   1.9550595e+01  -2.3479208e+01   3.5000000e+02   3.2680629e+00  -2.4658226e+00   4.7139831e+00
   1.9482847e+01  -2.3591678e+01   3.5000000e+02   3.3464978e+00  -2.4076474e+00   4.5076780e+00
   1.9420141e+01  -2.3706605e+01   3.5000000e+02   3.4088585e+00  -2.3620923e+00   4.2842708e+00
   1.9362596e+01  -2.3823796e+01   3.5000000e+02   3.4540791e+00  -2.3286743e+00   4.0464860e+00
   1.9310322e+01  -2.3943055e+01   3.5000000e+02   3.4812604e+00  -2.3067744e+00   3.7969797e+00
   1.9263420e+01  -2.4064182e+01   3.5000000e+02   3.4896723e+00  -2.2956533e+00   3.5382907e+00
   1.9221985e+01  -2.4186972e+01   3.5000000e+02   3.4787608e+00  -2.2944701e+00   3.2728022e+00
   1.9186102e+01  -2.4311218e+01   3.5000000e+02   3.4481550e+00  -2.3022907e+00   3.0027168e+00
   1.9155847e+01  -2.4436709e+01   3.5000000e+02   3.3976805e+00  -2.3181022e+00   2.7300538e+00
   1.9131290e+01  -2.4563232e+01   3.5000000e+02   3.3273767e+00  -2.3408333e+00   2.4566437e+00
   1.9112488e+01  -2.4690571e+01   3.5000000e+02   3.2375135e+00  -2.3693601e+00   2.1841544e+00
   1.9099491e+01  -2.4818509e+01   3.5000000e+02   3.1286108e+00  -2.4025339e+00   1.9140933e+00
   1.9092340e+01  -2.4946827e+01   3.5000000e+02   3.0014511e+00  -2.4391967e+00   1.6478273e+00
   1.9091065e+01  -2.5075303e+01   3.5000000e+02   2.8570849e+00  -2.4781968e+00   1.3865964e+00
   1.9095686e+01  -2.5203716e+01   3.5000000e+02   2.6968172e+00  -2.5184080e+00   1.1315053e+00
   1.9106215e+01  -2.5331844e+01   3.5000000e+02   2.5221834e+00  -2.5587444e+00   8.8351761e-01
   1.9122651e+01  -2.5459465e+01   3.5000000e+02   2.3349036e+00  -2.5981624e+00   6.4345027e-01
   1.9144986e+01  -2.5586355e+01   3.5000000e+02   2.1368268e+00  -2.6356705e+00   4.1195134e-01
   1.9173198e+01  -2.5712294e+01   3.5000000e+02   1.9298488e+00  -2.6703184e+00   1.8949114e-01
   1.9207258e+01  -2.5837061e+01   3.5000000e+02   1.7158427e+00  -2.7011964e+00  -2.3647543e-02
   1.9247123e+01  -2.5960436e+01   3.5000000e+02   1.4965796e+00  -2.7274171e+00  -2.2735327e-01
   1.9292743e+01  -2.6082202e+01   3.5000000e+02   1.2736586e+00  -2.7481099e+00  -4.2168112e-01
   1.9344055e+01  -2.6202142e+01   3.5000000e+02   1.0484647e+00  -2.7624059e+00  -6.0680403e-01
   1.9400984e+01  -2.6320044e+01   3.5000000e+02   8.2213569e-01  -2.7694332e+00  -7.8297267e-01
   1.9463449e+01  -2.6435698e+01   3.5000000e+02   5.9556876e-01  -2.7683239e+00  -9.5047132e-01
   1.9531353e+01  -2.6548897e+01   3.5000000e+02   3.6945091e-01  -2.7582169e+00  -1.1095445e+00
   1.9604592e+01  -2.6659438e+01   3.5000000e+02   1.4430688e-01  -2.7382825e+00  -1.2603663e+00
   1.9683050e+01  -2.6767121e+01   3.5000000e+02  -7.9429286e-02  -2.7077441e+00  -1.4029928e+00
   1.9766599e+01  -2.6871753e+01   3.5000000e+02  -3.0134606e-01  -2.6659047e+00  -1.5373404e+00
   1.9855105e+01  -2.6973144e+01   3.5000000e+02  -5.2097960e-01  -2.6121769e+00  -1.6631922e+00
   2.0276273e+01  -2.7525541e+01   3.5000000e+02  -1.6366929e+00  -2.1231027e+00  -1.8971289e+00
   2.0391263e+01  -2.7604104e+01   3.5000000e+02  -1.8208012e+00  -2.0040039e+00  -1.9586608e+00
   2.0509864e+01  -2.7678433e+01   3.5000000e+02  -1.9962313e+00  -1.8731778e+00  -2.0089681e+00
   2.0631879e+01  -2.7748401e+01   3.5000000e+02  -2.1618038e+00  -1.7308729e+00  -2.0474188e+00
   2.0757106e+01  -2.7813887e+01   3.5000000e+02  -2.3164438e+00  -1.5773885e+00  -2.0733219e+00
   2.0885336e+01  -2.7874777e+01   3.5000000e+02  -2.4592253e+00  -1.4130931e+00  -2.0859053e+00
   2.1016352e+01  -2.7930967e+01   3.5000000e+02  -2.5894083e+00  -1.2384559e+00  -2.0843014e+00
   2.1149934e+01  -2.7982360e+01   3.5000000e+02  -2.7064619e+00  -1.0540871e+00  -2.0675641e+00
   2.1285852e+01  -2.8028866e+01   3.5000000e+02  -2.8100763e+00  -8.6079550e-01  -2.0346911e+00
   2.1423876e+01  -2.8070404e+01   3.5000000e+02  -2.9001767e+00  -6.5962705e-01  -1.9846738e+00
   2.1563767e+01  -2.8106902e+01   3.5000000e+02  -2.9769202e+00  -4.5192125e-01  -1.9165601e+00
   2.1705286e+01  -2.8138297e+01   3.5000000e+02  -3.0406956e+00  -2.3933325e-01  -1.8295419e+00
   2.1848187e+01  -2.8164533e+01   3.5000000e+02  -3.0921099e+00  -2.3858266e-02  -1.7230559e+00
   2.1992222e+01  -2.8185565e+01   3.5000000e+02  -3.1319772e+00   1.9218765e-01  -1.5968783e+00
   2.2137143e+01  -2.8201357e+01   3.5000000e+02  -3.1612948e+00   4.0621097e-01  -1.4512273e+00
   2.2282695e+01  -2.8211879e+01   3.5000000e+02  -3.1812125e+00   6.1540385e-01  -1.2868607e+00
   2.2428627e+01  -2.8217116e+01   3.5000000e+02  -3.1929999e+00   8.1686620e-01  -1.1051101e+00
   2.2574683e+01  -2.8217055e+01   3.5000000e+02  -3.1980000e+00   1.0077208e+00  -9.0794273e-01
   2.2720608e+01  -2.8211700e+01   3.5000000e+02  -3.1975856e+00   1.1852676e+00  -6.9790670e-01
   2.2866149e+01  -2.8201057e+01   3.5000000e+02  -3.1931093e+00   1.3471279e+00  -4.7809527e-01
   2.3011052e+01  -2.8185146e+01   3.5000000e+02  -3.1858575e+00   1.4913703e+00  -2.5201792e-01
   2.3155065e+01  -2.8163996e+01   3.5000000e+02  -3.1770098e+00   1.6166138e+00  -2.3462232e-02
   2.3297937e+01  -2.8137642e+01   3.5000000e+02  -3.1676070e+00   1.7220860e+00   2.0366377e-01
   2.3439422e+01  -2.8106131e+01   3.5000000e+02  -3.1585282e+00   1.8076390e+00   4.2552227e-01
   2.3579274e+01  -2.8069518e+01   3.5000000e+02  -3.1504827e+00   1.8737146e+00   6.3848594e-01
   2.3717252e+01  -2.8027866e+01   3.5000000e+02  -3.1440110e+00   1.9212777e+00   8.3927993e-01
   2.3853120e+01  -2.7981249e+01   3.5000000e+02  -3.1394944e+00   1.9517165e+00   1.0250840e+00
   2.3986646e+01  -2.7929747e+01   3.5000000e+02  -3.1371766e+00   1.9667299e+00   1.1935755e+00
   2.4117601e+01  -2.7873449e+01   3.5000000e+02  -3.1371840e+00   1.9682114e+00   1.3429495e+00
   2.4245765e+01  -2.7812453e+01   3.5000000e+02  -3.1395483e+00   1.9581394e+00   1.4719133e+00
   2.4370922e+01  -2.7746865e+01   3.5000000e+02  -3.1442298e+00   1.9384846e+00   1.5796307e+00
   2.4492862e+01  -2.7676797e+01   3.5000000e+02  -3.1511365e+00   1.9111355e+00   1.6656632e+00
   2.4611383e+01  -2.7602370e+01   3.5000000e+02  -3.1601361e+00   1.8778423e+00   1.7299135e+00
   2.4726290e+01  -2.7523713e+01   3.5000000e+02  -3.1710666e+00   1.8401799e+00   1.7725550e+00
   2.4837393e+01  -2.7440959e+01   3.5000000e+02  -3.1837433e+00   1.7995290e+00   1.7939598e+00
   2.4944514e+01  -2.7354250e+01   3.5000000e+02  -3.1979550e+00   1.7570590e+00   1.7946678e+00
   2.5047479e+01  -2.7263734e+01   3.5000000e+02  -3.2134629e+00   1.7137315e+00   1.7753224e+00
   2.5146126e+01  -2.7169566e+01   3.5000000e+02  -3.2299906e+00   1.6702979e+00   1.7366513e+00
   2.5240299e+01  -2.7071903e+01   3.5000000e+02  -3.2472153e+00   1.6273128e+00   1.6794189e+00
   2.5329851e+01  -2.6970912e+01   3.5000000e+02  -3.2647504e+00   1.5851417e+00   1.6044296e+00
   2.5414645e+01  -2.6866763e+01   3.5000000e+02  -3.2821332e+00   1.5439786e+00   1.5125038e+00
   2.5494552e+01  -2.6759630e+01   3.5000000e+02  -3.2988123e+00   1.5038668e+00   1.4044752e+00
   2.5569454e+01  -2.6649693e+01   3.5000000e+02  -3.3141392e+00   1.4647193e+00   1.2812041e+00
   2.5639242e+01  -2.6537136e+01   3.5000000e+02  -3.3273707e+00   1.4263456e+00   1.1435821e+00
   2.5703813e+01  -2.6422145e+01   3.5000000e+02  -3.3376803e+00   1.3884778e+00   9.9253947e-01
   2.5763079e+01  -2.6304912e+01   3.5000000e+02  -3.3441809e+00   1.3507852e+00   8.2908115e-01
   2.5816957e+01  -2.6185630e+01   3.5000000e+02  -3.3459597e+00   1.3128987e+00   6.5427446e-01
   2.5865377e+01  -2.6064495e+01   3.5000000e+02  -3.3421188e+00   1.2744161e+00   4.6926821e-01
   2.5908276e+01  -2.5941708e+01   3.5000000e+02  -3.3318191e+00   1.2349110e+00   2.7528310e-01
   2.5945602e+01  -2.5817467e+01   3.5000000e+02  -3.3143209e+00   1.1939282e+00   7.3584904e-02
   2.5977311e+01  -2.5691977e+01   3.5000000e+02  -3.2890165e+00   1.1509813e+00  -1.3452326e-01
   2.6003372e+01  -2.5565441e+01   3.5000000e+02  -3.2554493e+00   1.1055400e+00  -3.4774150e-01
   2.6023759e+01  -2.5438065e+01   3.5000000e+02  -3.2133176e+00   1.0570267e+00  -5.6480168e-01
   2.6038458e+01  -2.5310053e+01   3.5000000e+02  -3.1624628e+00   1.0048036e+00  -7.8449040e-01
   2.6047463e+01  -2.5181612e+01   3.5000000e+02  -3.1028462e+00   9.4817268e-01  -1.0056556e+00
   2.6050779e+01  -2.5052948e+01   3.5000000e+02  -3.0345148e+00   8.8637524e-01  -1.2272070e+00
   2.6048417e+01  -2.4924267e+01   3.5000000e+02  -2.9575642e+00   8.1860270e-01  -1.4480995e+00
   2.6040400e+01  -2.4795773e+01   3.5000000e+02  -2.8721076e+00   7.4401094e-01  -1.6672940e+00
   2.6026758e+01  -2.4667672e+01   3.5000000e+02  -2.7782540e+00   6.6174932e-01  -1.8837096e+00
   2.6007529e+01  -2.4540166e+01   3.5000000e+02  -2.6760986e+00   5.7098989e-01  -2.0961793e+00
   2.5982761e+01  -2.4413457e+01   3.5000000e+02  -2.5657376e+00   4.7096907e-01  -2.3033932e+00
   2.5952508e+01  -2.4287744e+01   3.5000000e+02  -2.4472916e+00   3.6102818e-01  -2.5038704e+00
   2.5916835e+01  -2.4163224e+01   3.5000000e+02  -2.3209509e+00   2.4065713e-01  -2.6959354e+00
   2.5875813e+01  -2.4040093e+01   3.5000000e+02  -2.1870190e+00   1.0953374e-01  -2.8777313e+00
   2.5829521e+01  -2.3918543e+01   3.5000000e+02  -2.0459567e+00  -3.2447818e-02  -3.0472558e+00
   2.5778045e+01  -2.3798764e+01   3.5000000e+02  -1.8984162e+00  -1.8515505e-01  -3.2024169e+00
   2.5721479e+01  -2.3680941e+01   3.5000000e+02  -1.7452579e+00  -3.4821172e-01  -3.3411098e+00
   2.5659924e+01  -2.3565257e+01   3.5000000e+02  -1.5875518e+00  -5.2099935e-01  -3.4612966e+00
   2.5593487e+01  -2.3451890e+01   3.5000000e+02  -1.4265545e+00  -7.0267677e-01  -3.5610914e+00
   2.5522283e+01  -2.3341017e+01   3.5000000e+02  -1.2636825e+00  -8.9219871e-01  -3.6388300e+00
   2.5446433e+01  -2.3232808e+01   3.5000000e+02  -1.1004637e+00  -1.0883555e+00  -3.6931355e+00
   2.5366063e+01  -2.3127428e+01   3.5000000e+02  -9.3849264e-01  -1.2898074e+00  -3.7229618e+00
   2.5281307e+01  -2.3025039e+01   3.5000000e+02  -7.7939263e-01  -1.4951176e+00  -3.7276240e+00
   2.5192303e+01  -2.2925798e+01   3.5000000e+02  -6.2476922e-01  -1.7027980e+00  -3.7068167e+00
   2.5099196e+01  -2.2829857e+01   3.5000000e+02  -4.7617803e-01  -1.9113481e+00  -3.6606193e+00
   2.5002135e+01  -2.2737362e+01   3.5000000e+02  -3.3508833e-01  -2.1193007e+00  -3.5894891e+00
   2.4901275e+01  -2.2648453e+01   3.5000000e+02  -2.0285420e-01  -2.3252631e+00  -3.4942432e+00
   2.4796777e+01  -2.2563265e+01   3.5000000e+02  -8.0683243e-02  -2.5279576e+00  -3.3760279e+00
   2.4688803e+01  -2.2481928e+01   3.5000000e+02   3.0400762e-02  -2.7262666e+00  -3.2362698e+00
   2.4577524e+01  -2.2404565e+01   3.5000000e+02   1.2958353e-01  -2.9192578e+00  -3.0766196e+00
   2.4463110e+01  -2.2331292e+01   3.5000000e+02   2.1630001e-01  -3.1062186e+00  -2.8988680e+00
   2.4345741e+01  -2.2262222e+01   3.5000000e+02   2.9025289e-01  -3.2866484e+00  -2.7048730e+00
   2.4225595e+01  -2.2197457e+01   3.5000000e+02   3.5144148e-01  -3.4602693e+00  -2.4964487e+00
   2.4102858e+01  -2.2137095e+01   3.5000000e+02   4.0016493e-01  -3.6269811e+00  -2.2752905e+00
   2.3977715e+01  -2.2081227e+01   3.5000000e+02   4.3702566e-01  -3.7868255e+00  -2.0428802e+00
   2.3850358e+01  -2.2029938e+01   3.5000000e+02   4.6291032e-01  -3.9399130e+00  -1.8004346e+00
   2.3720978e+01  -2.1983304e+01   3.5000000e+02   4.7896443e-01  -4.0863567e+00  -1.5488537e+00
   2.3589772e+01  -2.1941395e+01   3.5000000e+02   4.8655249e-01  -4.2261846e+00  -1.2887265e+00
   2.3456937e+01  -2.1904275e+01   3.5000000e+02   4.8721470e-01  -4.3592702e+00  -1.0203462e+00
   2.3322672e+01  -2.1871998e+01   3.5000000e+02   4.8261281e-01  -4.4852682e+00  -7.4376485e-01
   2.3187180e+01  -2.1844614e+01   3.5000000e+02   4.7448366e-01  -4.6035667e+00  -4.5888087e-01
   2.3050662e+01  -2.1822163e+01   3.5000000e+02   4.6458675e-01  -4.7132732e+00  -1.6552099e-01
   2.2913322e+01  -2.1804679e+01   3.5000000e+02   4.5466328e-01  -4.8132153e+00   1.3644133e-01
   2.2775366e+01  -2.1792188e+01   3.5000000e+02   4.4639740e-01  -4.9019749e+00   4.4698171e-01
   2.2637000e+01  -2.1784709e+01   3.5000000e+02   4.4138716e-01  -4.9779478e+00   7.6582961e-01
   2.2498430e+01  -2.1782252e+01   3.5000000e+02   4.4111840e-01  -5.0394238e+00   1.0923853e+00
   2.2359861e+01  -2.1784823e+01   3.5000000e+02   4.4695362e-01  -5.0846834e+00   1.4256573e+00
   2.2221502e+01  -2.1792416e+01   3.5000000e+02   4.6010859e-01  -5.1121042e+00   1.7642150e+00
   2.2083558e+01  -2.1805020e+01   3.5000000e+02   4.8165203e-01  -5.1202751e+00   2.1061944e+00
   2.1946235e+01  -2.1822617e+01   3.5000000e+02   5.1249558e-01  -5.1081021e+00   2.4493047e+00
   2.1809738e+01  -2.1845180e+01   3.5000000e+02   5.5338397e-01  -5.0749042e+00   2.7908785e+00
   2.1674271e+01  -2.1872676e+01   3.5000000e+02   6.0489289e-01  -5.0204879e+00   3.1279393e+00
   2.1540036e+01  -2.1905063e+01   3.5000000e+02   6.6741708e-01  -4.9451954e+00   3.4572926e+00
   2.1407236e+01  -2.1942292e+01   3.5000000e+02   7.4116577e-01  -4.8499226e+00   3.7756183e+00
   2.1276069e+01  -2.1984309e+01   3.5000000e+02   8.2615901e-01  -4.7360986e+00   4.0795891e+00
   2.1146733e+01  -2.2031049e+01   3.5000000e+02   9.2220930e-01  -4.6056392e+00   4.3659630e+00
   2.1019424e+01  -2.2082443e+01   3.5000000e+02   1.0289283e+00  -4.4608680e+00   4.6316772e+00
   2.0894334e+01  -2.2138413e+01   3.5000000e+02   1.1457140e+00  -4.3044157e+00   4.8739338e+00
   2.0771653e+01  -2.2198876e+01   3.5000000e+02   1.2717580e+00  -4.1391124e+00   5.0902527e+00
   2.0651568e+01  -2.2263739e+01   3.5000000e+02   1.4060400e+00  -3.9678734e+00   5.2785213e+00
   2.0534263e+01  -2.2332907e+01   3.5000000e+02   1.5473530e+00  -3.7935935e+00   5.4370158e+00
   2.0419919e+01  -2.2406273e+01   3.5000000e+02   1.6942997e+00  -3.6190537e+00   5.5644246e+00
   2.0308713e+01  -2.2483727e+01   3.5000000e+02   1.8453315e+00  -3.4468440e+00   5.6598480e+00
   2.0200816e+01  -2.2565153e+01   3.5000000e+02   1.9987700e+00  -3.2793040e+00   5.7228022e+00
   2.0096398e+01  -2.2650427e+01   3.5000000e+02   2.1528339e+00  -3.1184946e+00   5.7532087e+00
   1.9995623e+01  -2.2739418e+01   3.5000000e+02   2.3056759e+00  -2.9661703e+00   5.7513935e+00
   1.9898650e+01  -2.2831994e+01   3.5000000e+02   2.4554286e+00  -2.8237787e+00   5.7180618e+00
   1.9805634e+01  -2.2928011e+01   3.5000000e+02   2.6002189e+00  -2.6924678e+00   5.6542970e+00
   1.9716725e+01  -2.3027325e+01   3.5000000e+02   2.7382223e+00  -2.5731037e+00   5.5615171e+00
   1.9632067e+01  -2.3129783e+01   3.5000000e+02   2.8676759e+00  -2.4662889e+00   5.4414597e+00
   1.9551798e+01  -2.3235229e+01   3.5000000e+02   2.9869127e+00  -2.3723898e+00   5.2961295e+00
   1.9476052e+01  -2.3343501e+01   3.5000000e+02   3.0943781e+00  -2.2915649e+00   5.1277531e+00
   1.9404954e+01  -2.3454432e+01   3.5000000e+02   3.1886450e+00  -2.2237819e+00   4.9387264e+00
   1.9338627e+01  -2.3567853e+01   3.5000000e+02   3.2684302e+00  -2.1688528e+00   4.7315394e+00
   1.9277184e+01  -2.3683587e+01   3.5000000e+02   3.3325916e+00  -2.1264380e+00   4.5087369e+00
   1.9220732e+01  -2.3801457e+01   3.5000000e+02   3.3801417e+00  -2.0960715e+00   4.2728356e+00
   1.9169372e+01  -2.3921279e+01   3.5000000e+02   3.4102437e+00  -2.0771706e+00   4.0262886e+00
   1.9123198e+01  -2.4042867e+01   3.5000000e+02   3.4222171e+00  -2.0690463e+00   3.7714306e+00
   1.9082297e+01  -2.4166031e+01   3.5000000e+02   3.4155410e+00  -2.0709117e+00   3.5104530e+00
   1.9046746e+01  -2.4290580e+01   3.5000000e+02   3.3898594e+00  -2.0818878e+00   3.2453825e+00
   1.9016617e+01  -2.4416318e+01   3.5000000e+02   3.3449950e+00  -2.1010199e+00   2.9780818e+00
   1.8991974e+01  -2.4543048e+01   3.5000000e+02   3.2809634e+00  -2.1272881e+00   2.7102490e+00
   1.8972871e+01  -2.4670569e+01   3.5000000e+02   3.1979911e+00  -2.1596177e+00   2.4434419e+00
   1.8959356e+01  -2.4798682e+01   3.5000000e+02   3.0965330e+00  -2.1969066e+00   2.1790736e+00
   1.8951466e+01  -2.4927181e+01   3.5000000e+02   2.9772914e+00  -2.2380324e+00   1.9184541e+00
   1.8949233e+01  -2.5055864e+01   3.5000000e+02   2.8412171e+00  -2.2818854e+00   1.6627636e+00
   1.8952678e+01  -2.5184526e+01   3.5000000e+02   2.6895087e+00  -2.3273747e+00   1.4130777e+00
   1.8961812e+01  -2.5312959e+01   3.5000000e+02   2.5235944e+00  -2.3734448e+00   1.1703555e+00
   1.8976640e+01  -2.5440959e+01   3.5000000e+02   2.3450877e+00  -2.4190933e+00   9.3540508e-01
   1.8997156e+01  -2.5568319e+01   3.5000000e+02   2.1557418e+00  -2.4633668e+00   7.0888666e-01
   1.9023345e+01  -2.5694833e+01   3.5000000e+02   1.9573795e+00  -2.5053645e+00   4.9128469e-01
   1.9055182e+01  -2.5820297e+01   3.5000000e+02   1.7518167e+00  -2.5442297e+00   2.8289852e-01
   1.9092635e+01  -2.5944507e+01   3.5000000e+02   1.5407900e+00  -2.5791432e+00   8.3839588e-02
   1.9135659e+01  -2.6067259e+01   3.5000000e+02   1.3258881e+00  -2.6093039e+00  -1.0594496e-01
   1.9184203e+01  -2.6188354e+01   3.5000000e+02   1.1084883e+00  -2.6339234e+00  -2.8666168e-01
   1.9238205e+01  -2.6307592e+01   3.5000000e+02   8.8973255e-01  -2.6522116e+00  -4.5861492e-01
   1.9297592e+01  -2.6424776e+01   3.5000000e+02   6.7051232e-01  -2.6633734e+00  -6.2215971e-01
   1.9362282e+01  -2.6539714e+01   3.5000000e+02   4.5148241e-01  -2.6666124e+00  -7.7765052e-01
   1.9432187e+01  -2.6652214e+01   3.5000000e+02   2.3311046e-01  -2.6611465e+00  -9.2539245e-01
   1.9507204e+01  -2.6762089e+01   3.5000000e+02   1.5733531e-02  -2.6462186e+00  -1.0655816e+00
   1.9587223e+01  -2.6869156e+01   3.5000000e+02  -2.0036921e-01  -2.6211272e+00  -1.1982893e+00
   1.9672127e+01  -2.6973236e+01   3.5000000e+02  -4.1490109e-01  -2.5852511e+00  -1.3234482e+00
   1.9761785e+01  -2.7074154e+01   3.5000000e+02  -6.2747534e-01  -2.5380709e+00  -1.4408433e+00
   1.9856060e+01  -2.7171739e+01   3.5000000e+02  -8.3756619e-01  -2.4791899e+00  -1.5501451e+00
   1.9954807e+01  -2.7265827e+01   3.5000000e+02  -1.0444814e+00  -2.4083388e+00  -1.6509311e+00
   2.0057868e+01  -2.7356258e+01   3.5000000e+02  -1.2473470e+00  -2.3253763e+00  -1.7427092e+00
   2.0165081e+01  -2.7442878e+01   3.5000000e+02  -1.4451339e+00  -2.2302751e+00  -1.8249580e+00
   2.0686306e+01  -2.7925669e+01   3.5000000e+02  -2.3913452e+00  -1.5615848e+00  -1.8131999e+00
   2.0814779e+01  -2.7986786e+01   3.5000000e+02  -2.5290407e+00  -1.4088007e+00  -1.8254651e+00
   2.0945959e+01  -2.8043369e+01   3.5000000e+02  -2.6542631e+00  -1.2459164e+00  -1.8250465e+00
   2.1079638e+01  -2.8095326e+01   3.5000000e+02  -2.7664545e+00  -1.0733532e+00  -1.8110460e+00
   2.1215606e+01  -2.8142574e+01   3.5000000e+02  -2.8652690e+00  -8.9169534e-01  -1.7824666e+00
   2.1353647e+01  -2.8185037e+01   3.5000000e+02  -2.9505750e+00  -7.0174973e-01  -1.7382525e+00
   2.1493540e+01  -2.8222644e+01   3.5000000e+02  -3.0224569e+00  -5.0459762e-01  -1.6773528e+00
   2.1635060e+01  -2.8255337e+01   3.5000000e+02  -3.0812197e+00  -3.0163252e-01  -1.5987838e+00
   2.1777982e+01  -2.8283060e+01   3.5000000e+02  -3.1273794e+00  -9.4585256e-02  -1.5017430e+00
   2.1922073e+01  -2.8305770e+01   3.5000000e+02  -3.1616582e+00   1.1446441e-01  -1.3856898e+00
   2.2067101e+01  -2.8323429e+01   3.5000000e+02  -3.1849694e+00   3.2312123e-01  -1.2504660e+00
   2.2212832e+01  -2.8336008e+01   3.5000000e+02  -3.1983982e+00   5.2872656e-01  -1.0963843e+00
   2.2359029e+01  -2.8343488e+01   3.5000000e+02  -3.2031735e+00   7.2844423e-01  -9.2430908e-01
   2.2505454e+01  -2.8345856e+01   3.5000000e+02  -3.2006322e+00   9.1937990e-01  -7.3571436e-01
   2.2651871e+01  -2.8343107e+01   3.5000000e+02  -3.1921779e+00   1.0987230e+00  -5.3268816e-01
   2.2798041e+01  -2.8335247e+01   3.5000000e+02  -3.1792337e+00   1.2638867e+00  -3.1789993e-01
   2.2943728e+01  -2.8322288e+01   3.5000000e+02  -3.1631934e+00   1.4126566e+00  -9.4523480e-02
   2.3088695e+01  -2.8304252e+01   3.5000000e+02  -3.1453753e+00   1.5433055e+00   1.3388590e-01
   2.3232707e+01  -2.8281167e+01   3.5000000e+02  -3.1269810e+00   1.6546836e+00   3.6353974e-01
   2.3375531e+01  -2.8253072e+01   3.5000000e+02  -3.1090621e+00   1.7462600e+00   5.9059437e-01
   2.3516939e+01  -2.8220012e+01   3.5000000e+02  -3.0924998e+00   1.8181226e+00   8.1131407e-01
   2.3656701e+01  -2.8182041e+01   3.5000000e+02  -3.0779964e+00   1.8709282e+00   1.0222133e+00
   2.3794595e+01  -2.8139219e+01   3.5000000e+02  -3.0660768e+00   1.9058282e+00   1.2201919e+00
   2.3930400e+01  -2.8091618e+01   3.5000000e+02  -3.0570996e+00   1.9243596e+00   1.4026163e+00
   2.4063901e+01  -2.8039313e+01   3.5000000e+02  -3.0512798e+00   1.9283342e+00   1.5673554e+00
   2.4194885e+01  -2.7982389e+01   3.5000000e+02  -3.0487096e+00   1.9197223e+00   1.7127927e+00
   2.4323149e+01  -2.7920938e+01   3.5000000e+02  -3.0493821e+00   1.9005483e+00   1.8378102e+00
   2.4448489e+01  -2.7855059e+01   3.5000000e+02  -3.0532181e+00   1.8728061e+00   1.9417198e+00
   2.4570713e+01  -2.7784858e+01   3.5000000e+02  -3.0600814e+00   1.8383868e+00   2.0242264e+00
   2.4689631e+01  -2.7710446e+01   3.5000000e+02  -3.0698003e+00   1.7990344e+00   2.0853383e+00
   2.4805061e+01  -2.7631944e+01   3.5000000e+02  -3.0821730e+00   1.7563097e+00   2.1253233e+00
   2.4916827e+01  -2.7549475e+01   3.5000000e+02  -3.0969814e+00   1.7115760e+00   2.1446301e+00
   2.5024761e+01  -2.7463172e+01   3.5000000e+02  -3.1139873e+00   1.6659860e+00   2.1438555e+00
   2.5128703e+01  -2.7373171e+01   3.5000000e+02  -3.1329354e+00   1.6204830e+00   2.1236873e+00
   2.5228498e+01  -2.7279614e+01   3.5000000e+02  -3.1535465e+00   1.5758045e+00   2.0848707e+00
   2.5324001e+01  -2.7182650e+01   3.5000000e+02  -3.1755043e+00   1.5324850e+00   2.0281897e+00
   2.5415073e+01  -2.7082429e+01   3.5000000e+02  -3.1984466e+00   1.4908714e+00   1.9544288e+00
   2.5501585e+01  -2.6979111e+01   3.5000000e+02  -3.2219427e+00   1.4511316e+00   1.8643831e+00
   2.5583414e+01  -2.6872856e+01   3.5000000e+02  -3.2454833e+00   1.4132794e+00   1.7588276e+00
   2.5660449e+01  -2.6763829e+01   3.5000000e+02  -3.2684637e+00   1.3771911e+00   1.6385390e+00
   2.5732583e+01  -2.6652200e+01   3.5000000e+02  -3.2901793e+00   1.3426376e+00   1.5042963e+00
   2.5799720e+01  -2.6538143e+01   3.5000000e+02  -3.3098288e+00   1.3093055e+00   1.3569057e+00
   2.5861772e+01  -2.6421832e+01   3.5000000e+02  -3.3265314e+00   1.2768255e+00   1.1972098e+00
   2.5918660e+01  -2.6303447e+01   3.5000000e+02  -3.3393537e+00   1.2447915e+00   1.0261208e+00
   2.5970313e+01  -2.6183169e+01   3.5000000e+02  -3.3473497e+00   1.2127780e+00   8.4462260e-01
   2.6016669e+01  -2.6061182e+01   3.5000000e+02  -3.3496054e+00   1.1803478e+00   6.5378162e-01
   2.6057675e+01  -2.5937671e+01   3.5000000e+02  -3.3452853e+00   1.1470551e+00   4.5473563e-01
   2.6093286e+01  -2.5812825e+01   3.5000000e+02  -3.3336732e+00   1.1124417e+00   2.4868073e-01
   2.6123465e+01  -2.5686832e+01   3.5000000e+02  -3.3142029e+00   1.0760293e+00   3.6834325e-02
   2.6148185e+01  -2.5559882e+01   3.5000000e+02  -3.2864743e+00   1.0373076e+00  -1.7958819e-01
   2.6167426e+01  -2.5432165e+01   3.5000000e+02  -3.2502522e+00   9.9572422e-01  -3.9941220e-01
   2.6181176e+01  -2.5303873e+01   3.5000000e+02  -3.2054504e+00   9.5067489e-01  -6.2152384e-01
   2.6189434e+01  -2.5175198e+01   3.5000000e+02  -3.1521015e+00   9.0149593e-01  -8.4488376e-01
   2.6192204e+01  -2.5046330e+01   3.5000000e+02  -3.0903152e+00   8.4746487e-01  -1.0685360e+00
   2.6189500e+01  -2.4917461e+01   3.5000000e+02  -3.0202390e+00   7.8780608e-01  -1.2915757e+00
   2.6181342e+01  -2.4788782e+01   3.5000000e+02  -2.9420181e+00   7.2170487e-01  -1.5131239e+00
   2.6167759e+01  -2.4660481e+01   3.5000000e+02  -2.8557678e+00   6.4832745e-01  -1.7322785e+00
   2.6148789e+01  -2.4532749e+01   3.5000000e+02  -2.7615668e+00   5.6685476e-01  -1.9480497e+00
   2.6124475e+01  -2.4405771e+01   3.5000000e+02  -2.6594573e+00   4.7651383e-01  -2.1593250e+00
   2.6094868e+01  -2.4279733e+01   3.5000000e+02  -2.5494781e+00   3.7662201e-01  -2.3648116e+00
   2.6060027e+01  -2.4154819e+01   3.5000000e+02  -2.4317043e+00   2.6662692e-01  -2.5630158e+00
   2.6020018e+01  -2.4031210e+01   3.5000000e+02  -2.3062972e+00   1.4614401e-01  -2.7522452e+00
   2.5974912e+01  -2.3909085e+01   3.5000000e+02  -2.1735529e+00   1.4988699e-02  -2.9306338e+00
   2.5924790e+01  -2.3788621e+01   3.5000000e+02  -2.0339491e+00  -1.2679967e-01  -3.0961870e+00
   2.5869736e+01  -2.3669991e+01   3.5000000e+02  -1.8881649e+00  -2.7895116e-01  -3.2468582e+00
   2.5809843e+01  -2.3553365e+01   3.5000000e+02  -1.7370956e+00  -4.4096311e-01  -3.3806202e+00
   2.5745208e+01  -2.3438912e+01   3.5000000e+02  -1.5818389e+00  -6.1211198e-01  -3.4955476e+00
   2.5675937e+01  -2.3326794e+01   3.5000000e+02  -1.4236698e+00  -7.9147780e-01  -3.5898928e+00
   2.5602138e+01  -2.3217172e+01   3.5000000e+02  -1.2640010e+00  -9.7796901e-01  -3.6621473e+00
   2.5523926e+01  -2.3110201e+01   3.5000000e+02  -1.1043423e+00  -1.1703560e+00  -3.7110917e+00
   2.5441424e+01  -2.3006035e+01   3.5000000e+02  -9.4626414e-01  -1.3672969e+00  -3.7358301e+00
   2.5354757e+01  -2.2904819e+01   3.5000000e+02  -7.9134686e-01  -1.5673867e+00  -3.7358171e+00
   2.5264056e+01  -2.2806699e+01   3.5000000e+02  -6.4115683e-01  -1.7691776e+00  -3.7108686e+00
   2.5169457e+01  -2.2711812e+01   3.5000000e+02  -4.9720840e-01  -1.9712295e+00  -3.6611674e+00
   2.5071102e+01  -2.2620292e+01   3.5000000e+02  -3.6093909e-01  -2.1721403e+00  -3.5872586e+00
   2.4969133e+01  -2.2532269e+01   3.5000000e+02  -2.3367304e-01  -2.3705945e+00  -3.4900313e+00
   2.4863703e+01  -2.2447865e+01   3.5000000e+02  -1.1659951e-01  -2.5653969e+00  -3.3706948e+00
   2.4754962e+01  -2.2367199e+01   3.5000000e+02  -1.0728289e-02  -2.7555208e+00  -3.2307277e+00
   2.4643070e+01  -2.2290385e+01   3.5000000e+02   8.3132961e-02  -2.9401295e+00  -3.0718275e+00
   2.4528186e+01  -2.2217530e+01   3.5000000e+02   1.6442046e-01  -3.1186139e+00  -2.8958254e+00
   2.4410476e+01  -2.2148736e+01   3.5000000e+02   2.3283516e-01  -3.2905909e+00  -2.7046071e+00
   2.4290106e+01  -2.2084099e+01   3.5000000e+02   2.8836781e-01  -3.4559040e+00  -2.5000108e+00
   2.4167247e+01  -2.2023709e+01   3.5000000e+02   3.3130500e-01  -3.6145899e+00  -2.2837377e+00
   2.4042073e+01  -2.1967650e+01   3.5000000e+02   3.6222785e-01  -3.7668323e+00  -2.0572655e+00
   2.3914760e+01  -2.1916000e+01   3.5000000e+02   3.8199654e-01  -3.9128977e+00  -1.8217785e+00
   2.3785486e+01  -2.1868832e+01   3.5000000e+02   3.9172267e-01  -4.0530581e+00  -1.5781260e+00
   2.3654432e+01  -2.1826210e+01   3.5000000e+02   3.9272847e-01  -4.1875072e+00  -1.3268093e+00
   2.3521781e+01  -2.1788195e+01   3.5000000e+02   3.8650516e-01  -4.3162802e+00  -1.0680047e+00
   2.3387718e+01  -2.1754838e+01   3.5000000e+02   3.7465940e-01  -4.4391854e+00  -8.0161047e-01
   2.3252428e+01  -2.1726186e+01   3.5000000e+02   3.5886843e-01  -4.5557540e+00  -5.2732527e-01
   2.3116098e+01  -2.1702278e+01   3.5000000e+02   3.4083076e-01  -4.6652099e+00  -2.4474634e-01
   2.2978918e+01  -2.1683149e+01   3.5000000e+02   3.2222931e-01  -4.7664670e+00   4.6517530e-02
   2.2841078e+01  -2.1668824e+01   3.5000000e+02   3.0469180e-01  -4.8581568e+00   3.4674361e-01
   2.2702767e+01  -2.1659323e+01   3.5000000e+02   2.8976849e-01  -4.9386792e+00   6.5599071e-01
   2.2564176e+01  -2.1654660e+01   3.5000000e+02   2.7891160e-01  -5.0062739e+00   9.7400196e-01
   2.2425496e+01  -2.1654840e+01   3.5000000e+02   2.7345748e-01  -5.0591130e+00   1.3001374e+00
   2.2286920e+01  -2.1659864e+01   3.5000000e+02   2.7462329e-01  -5.0954063e+00   1.6333197e+00
   2.2148637e+01  -2.1669725e+01   3.5000000e+02   2.8349549e-01  -5.1135128e+00   1.9720274e+00
   2.2010839e+01  -2.1684408e+01   3.5000000e+02   3.0102494e-01  -5.1120502e+00   2.3142847e+00
   2.1873716e+01  -2.1703895e+01   3.5000000e+02   3.2802988e-01  -5.0899981e+00   2.6577066e+00
   2.1737458e+01  -2.1728157e+01   3.5000000e+02   3.6517961e-01  -5.0467838e+00   2.9995539e+00
   2.1602252e+01  -2.1757160e+01   3.5000000e+02   4.1299766e-01  -4.9823447e+00   3.3368203e+00
   2.1468288e+01  -2.1790866e+01   3.5000000e+02   4.7185727e-01  -4.8971656e+00   3.6663125e+00
   2.1335749e+01  -2.1829227e+01   3.5000000e+02   5.4196388e-01  -4.7922754e+00   3.9847792e+00
   2.1204822e+01  -2.1872189e+01   3.5000000e+02   6.2335298e-01  -4.6692238e+00   4.2889866e+00
   2.1075688e+01  -2.1919694e+01   3.5000000e+02   7.1588571e-01  -4.5300128e+00   4.5758385e+00
   2.0948528e+01  -2.1971674e+01   3.5000000e+02   8.1923005e-01  -4.3770167e+00   4.8424463e+00
   2.0823520e+01  -2.2028059e+01   3.5000000e+02   9.3286963e-01  -4.2128768e+00   5.0861994e+00
   2.0700841e+01  -2.2088768e+01   3.5000000e+02   1.0560834e+00  -4.0403946e+00   5.3048109e+00
   2.0580663e+01  -2.2153718e+01   3.5000000e+02   1.1879641e+00  -3.8624185e+00   5.4963521e+00
   2.0463158e+01  -2.2222818e+01   3.5000000e+02   1.3274119e+00  -3.6817518e+00   5.6592595e+00
   2.0348491e+01  -2.2295971e+01   3.5000000e+02   1.4731511e+00  -3.5010590e+00   5.7923506e+00
   2.0236828e+01  -2.2373076e+01   3.5000000e+02   1.6237512e+00  -3.3228127e+00   5.8948047e+00
   2.0128329e+01  -2.2454024e+01   3.5000000e+02   1.7776428e+00  -3.1492366e+00   5.9661713e+00
   2.0023151e+01  -2.2538701e+01   3.5000000e+02   1.9331522e+00  -2.9822823e+00   6.0063539e+00
   1.9921446e+01  -2.2626990e+01   3.5000000e+02   2.0885361e+00  -2.8236149e+00   6.0156005e+00
   1.9823365e+01  -2.2718765e+01   3.5000000e+02   2.2420040e+00  -2.6746202e+00   5.9944954e+00
   1.9729052e+01  -2.2813897e+01   3.5000000e+02   2.3917619e+00  -2.5364063e+00   5.9439464e+00
   1.9638647e+01  -2.2912253e+01   3.5000000e+02   2.5360409e+00  -2.4098269e+00   5.8651642e+00
   1.9552286e+01  -2.3013693e+01   3.5000000e+02   2.6731213e+00  -2.2955022e+00   5.7596454e+00
   1.9470099e+01  -2.3118074e+01   3.5000000e+02   2.8013624e+00  -2.1938407e+00   5.6291383e+00
   1.9392212e+01  -2.3225247e+01   3.5000000e+02   2.9192191e+00  -2.1050657e+00   5.4756095e+00
   1.9318746e+01  -2.3335061e+01   3.5000000e+02   3.0252627e+00  -2.0292365e+00   5.3011941e+00
   1.9249816e+01  -2.3447358e+01   3.5000000e+02   3.1181863e+00  -1.9662648e+00   5.1081575e+00
   1.9185531e+01  -2.3561979e+01   3.5000000e+02   3.1968195e+00  -1.9159327e+00   4.8988303e+00
   1.9125995e+01  -2.3678760e+01   3.5000000e+02   3.2601288e+00  -1.8779050e+00   4.6755633e+00
   1.9071306e+01  -2.3797532e+01   3.5000000e+02   3.3072204e+00  -1.8517359e+00   4.4406790e+00
   1.9021554e+01  -2.3918126e+01   3.5000000e+02   3.3373439e+00  -1.8368746e+00   4.1964176e+00
   1.8976826e+01  -2.4040367e+01   3.5000000e+02   3.3498914e+00  -1.8326748e+00   3.9449121e+00
   1.8937199e+01  -2.4164080e+01   3.5000000e+02   3.3444006e+00  -1.8383916e+00   3.6881570e+00
   1.8902746e+01  -2.4289084e+01   3.5000000e+02   3.3205612e+00  -1.8531945e+00   3.4280059e+00
   1.8873531e+01  -2.4415198e+01   3.5000000e+02   3.2782246e+00  -1.8761708e+00   3.1661620e+00
   1.8849613e+01  -2.4542239e+01   3.5000000e+02   3.2174188e+00  -1.9063436e+00   2.9041868e+00
   1.8831043e+01  -2.4670020e+01   3.5000000e+02   3.1383657e+00  -1.9426811e+00   2.6435228e+00
   1.8817863e+01  -2.4798355e+01   3.5000000e+02   3.0414975e+00  -1.9841153e+00   2.3854977e+00
   1.8810111e+01  -2.4927055e+01   3.5000000e+02   2.9274757e+00  -2.0295679e+00   2.1313388e+00
   1.8807813e+01  -2.5055931e+01   3.5000000e+02   2.7971960e+00  -2.0779584e+00   1.8821826e+00
   1.8810992e+01  -2.5184791e+01   3.5000000e+02   2.6517918e+00  -2.1282358e+00   1.6390641e+00
   1.8819658e+01  -2.5313444e+01   3.5000000e+02   2.4926115e+00  -2.1793800e+00   1.4029123e+00
   1.8833818e+01  -2.5441700e+01   3.5000000e+02   2.3211883e+00  -2.2304284e+00   1.1745174e+00
   1.8853467e+01  -2.5569366e+01   3.5000000e+02   2.1391951e+00  -2.2804672e+00   9.5452977e-01
   1.8878595e+01  -2.5696251e+01   3.5000000e+02   1.9483780e+00  -2.3286433e+00   7.4342065e-01
   1.8909179e+01  -2.5822166e+01   3.5000000e+02   1.7504843e+00  -2.3741486e+00   5.4148266e-01
   1.8945193e+01  -2.5946919e+01   3.5000000e+02   1.5471979e+00  -2.4162223e+00   3.4881521e-01
   1.8986599e+01  -2.6070322e+01   3.5000000e+02   1.3400589e+00  -2.4541279e+00   1.6534083e-01
   1.9033352e+01  -2.6192188e+01   3.5000000e+02   1.1304110e+00  -2.4871452e+00  -9.1748878e-03
   1.9085398e+01  -2.6312332e+01   3.5000000e+02   9.1936123e-01  -2.5145561e+00  -1.7508271e-01
   1.9142673e+01  -2.6430569e+01   3.5000000e+02   7.0776795e-01  -2.5356368e+00  -3.3279817e-01
   1.9205107e+01  -2.6546718e+01   3.5000000e+02   4.9624322e-01  -2.5496599e+00  -4.8275680e-01
   1.9272619e+01  -2.6660601e+01   3.5000000e+02   2.8519046e-01  -2.5558959e+00  -6.2534950e-01
   1.9345121e+01  -2.6772041e+01   3.5000000e+02   7.4862469e-02  -2.5536317e+00  -7.6088212e-01
   1.9422517e+01  -2.6880867e+01   3.5000000e+02  -1.3457589e-01  -2.5421881e+00  -8.8953881e-01
   1.9504699e+01  -2.6986910e+01   3.5000000e+02  -3.4296222e-01  -2.5209432e+00  -1.0113549e+00
   1.9591555e+01  -2.7090003e+01   3.5000000e+02  -5.5006677e-01  -2.4893622e+00  -1.1262312e+00
   1.9682962e+01  -2.7189986e+01   3.5000000e+02  -7.5553438e-01  -2.4470102e+00  -1.2339340e+00
   1.9778789e+01  -2.7286702e+01   3.5000000e+02  -9.5883618e-01  -2.3935699e+00  -1.3341287e+00
   1.9878898e+01  -2.7379999e+01   3.5000000e+02  -1.1592530e+00  -2.3288433e+00  -1.4264138e+00
   1.9983142e+01  -2.7469729e+01   3.5000000e+02  -1.3558767e+00  -2.2527443e+00  -1.5103509e+00
   2.0091368e+01  -2.7555751e+01   3.5000000e+02  -1.5476427e+00  -2.1652800e+00  -1.5854917e+00
   2.0203413e+01  -2.7637929e+01   3.5000000e+02  -1.7333682e+00  -2.0665295e+00  -1.6513864e+00
   2.0319108e+01  -2.7716131e+01   3.5000000e+02  -1.9118094e+00  -1.9566210e+00  -1.7075897e+00
   2.0438279e+01  -2.7790233e+01   3.5000000e+02  -2.0817258e+00  -1.8357080e+00  -1.7536411e+00
   2.0560741e+01  -2.7860116e+01   3.5000000e+02  -2.2419298e+00  -1.7039650e+00  -1.7890356e+00
   2.1165322e+01  -2.8262981e+01   3.5000000e+02  -2.9260530e+00  -8.9310578e-01  -1.5161380e+00
   2.1302850e+01  -2.8305387e+01   3.5000000e+02  -3.0045742e+00  -7.1511688e-01  -1.4753934e+00
   2.1442164e+01  -2.8343157e+01   3.5000000e+02  -3.0698425e+00  -5.2962796e-01  -1.4195584e+00
   2.1583055e+01  -2.8376234e+01   3.5000000e+02  -3.1220983e+00  -3.3779823e-01  -1.3475628e+00
   2.1725317e+01  -2.8404569e+01   3.5000000e+02  -3.1617792e+00  -1.4110992e-01  -1.2584446e+00
   2.1868736e+01  -2.8428119e+01   3.5000000e+02  -3.1895152e+00   5.8602678e-02  -1.1514511e+00
   2.2013100e+01  -2.8446848e+01   3.5000000e+02  -3.2061242e+00   2.5917689e-01  -1.0261373e+00
   2.2158193e+01  -2.8460729e+01   3.5000000e+02  -3.2126010e+00   4.5815266e-01  -8.8246421e-01
   2.2303797e+01  -2.8469741e+01   3.5000000e+02  -3.2100976e+00   6.5284513e-01  -7.2089440e-01
   2.2449696e+01  -2.8473871e+01   3.5000000e+02  -3.1998973e+00   8.4045043e-01  -5.4245098e-01
   2.2595669e+01  -2.8473111e+01   3.5000000e+02  -3.1833802e+00   1.0181616e+00  -3.4876585e-01
   2.2741500e+01  -2.8467463e+01   3.5000000e+02  -3.1619807e+00   1.1833206e+00  -1.4205155e-01
   2.2886969e+01  -2.8456936e+01   3.5000000e+02  -3.1371411e+00   1.3335486e+00   7.4931056e-02
   2.3031858e+01  -2.8441545e+01   3.5000000e+02  -3.1102641e+00   1.4668829e+00   2.9897215e-01
   2.3175951e+01  -2.8421314e+01   3.5000000e+02  -3.0826649e+00   1.5818783e+00   5.2654894e-01
   2.3319033e+01  -2.8396273e+01   3.5000000e+02  -3.0555328e+00   1.6776728e+00   7.5397142e-01
   2.3460892e+01  -2.8366459e+01   3.5000000e+02  -3.0298996e+00   1.7540114e+00   9.7755047e-01
   2.3601315e+01  -2.8331918e+01   3.5000000e+02  -3.0066198e+00   1.8112250e+00   1.1937494e+00
   2.3740095e+01  -2.8292700e+01   3.5000000e+02  -2.9863646e+00   1.8501767e+00   1.3993240e+00
   2.3877028e+01  -2.8248866e+01   3.5000000e+02  -2.9696216e+00   1.8721708e+00   1.5914337e+00
   2.4011913e+01  -2.8200479e+01   3.5000000e+02  -2.9567150e+00   1.8788511e+00   1.7676929e+00
   2.4144550e+01  -2.8147613e+01   3.5000000e+02  -2.9478194e+00   1.8720873e+00   1.9262139e+00
   2.4274749e+01  -2.8090347e+01   3.5000000e+02  -2.9429855e+00   1.8538684e+00   2.0656092e+00
   2.4402319e+01  -2.8028764e+01   3.5000000e+02  -2.9421694e+00   1.8262101e+00   2.1849373e+00
   2.4527078e+01  -2.7962957e+01   3.5000000e+02  -2.9452482e+00   1.7910718e+00   2.2836824e+00
   2.4648847e+01  -2.7893024e+01   3.5000000e+02  -2.9520465e+00   1.7503014e+00   2.3616726e+00
   2.4767452e+01  -2.7819066e+01   3.5000000e+02  -2.9623551e+00   1.7055944e+00   2.4190169e+00
   2.4882727e+01  -2.7741195e+01   3.5000000e+02  -2.9759359e+00   1.6584624e+00   2.4560621e+00
   2.4994510e+01  -2.7659523e+01   3.5000000e+02  -2.9925421e+00   1.6102262e+00   2.4733116e+00
   2.5102647e+01  -2.7574171e+01   3.5000000e+02  -3.0119140e+00   1.5620025e+00   2.4713991e+00
   2.5206988e+01  -2.7485263e+01   3.5000000e+02  -3.0337861e+00   1.5147089e+00   2.4510318e+00
   2.5307391e+01  -2.7392930e+01   3.5000000e+02  -3.0578791e+00   1.4690606e+00   2.4129692e+00
   2.5403722e+01  -2.7297305e+01   3.5000000e+02  -3.0838950e+00   1.4255774e+00   2.3579860e+00
   2.5495852e+01  -2.7198528e+01   3.5000000e+02  -3.1115018e+00   1.3845922e+00   2.2868544e+00
   2.5583660e+01  -2.7096740e+01   3.5000000e+02  -3.1403195e+00   1.3462621e+00   2.2003213e+00
   2.5667033e+01  -2.6992090e+01   3.5000000e+02  -3.1698973e+00   1.3105821e+00   2.0991119e+00
   2.5745863e+01  -2.6884727e+01   3.5000000e+02  -3.1997013e+00   1.2774115e+00   1.9839112e+00
   2.5820052e+01  -2.6774804e+01   3.5000000e+02  -3.2290974e+00   1.2464927e+00   1.8553862e+00
   2.5889508e+01  -2.6662480e+01   3.5000000e+02  -3.2573466e+00   1.2174816e+00   1.7142025e+00
   2.5954147e+01  -2.6547913e+01   3.5000000e+02  -3.2836142e+00   1.1899750e+00   1.5610362e+00
   2.6013892e+01  -2.6431267e+01   3.5000000e+02  -3.3069860e+00   1.1635343e+00   1.3966129e+00
   2.6068675e+01  -2.6312706e+01   3.5000000e+02  -3.3265026e+00   1.1377057e+00   1.2217212e+00
   2.6118434e+01  -2.6192397e+01   3.5000000e+02  -3.3412009e+00   1.1120354e+00   1.0372315e+00
   2.6163116e+01  -2.6070510e+01   3.5000000e+02  -3.3501612e+00   1.0860746e+00   8.4410538e-01
   2.6202673e+01  -2.5947215e+01   3.5000000e+02  -3.3525554e+00   1.0593828e+00   6.4337802e-01
   2.6237069e+01  -2.5822683e+01   3.5000000e+02  -3.3476873e+00   1.0315167e+00   4.3614924e-01
   2.6266271e+01  -2.5697088e+01   3.5000000e+02  -3.3350226e+00   1.0020268e+00   2.2354866e-01
   2.6290256e+01  -2.5570605e+01   3.5000000e+02  -3.3142036e+00   9.7044029e-01   6.7055397e-03
   2.6309007e+01  -2.5443407e+01   3.5000000e+02  -3.2850452e+00   9.3624990e-01  -2.1329543e-01
   2.6322517e+01  -2.5315670e+01   3.5000000e+02  -3.2475177e+00   8.9890142e-01  -4.3542837e-01
   2.6330782e+01  -2.5187569e+01   3.5000000e+02  -3.2017109e+00   8.5778773e-01  -6.5875951e-01
   2.6333808e+01  -2.5059280e+01   3.5000000e+02  -3.1477937e+00   8.1224272e-01  -8.8243837e-01
   2.6331608e+01  -2.4930976e+01   3.5000000e+02  -3.0859651e+00   7.6154411e-01  -1.1056940e+00
   2.6324201e+01  -2.4802834e+01   3.5000000e+02  -3.0164138e+00   7.0492634e-01  -1.3277928e+00
   2.6311613e+01  -2.4675025e+01   3.5000000e+02  -2.9392801e+00   6.4159382e-01  -1.5480089e+00
   2.6293876e+01  -2.4547724e+01   3.5000000e+02  -2.8546425e+00   5.7075090e-01  -1.7655535e+00
   2.6271031e+01  -2.4421101e+01   3.5000000e+02  -2.7625156e+00   4.9162927e-01  -1.9795300e+00
   2.6243123e+01  -2.4295326e+01   3.5000000e+02  -2.6628712e+00   4.0352766e-01  -2.1888809e+00
   2.6210204e+01  -2.4170568e+01   3.5000000e+02  -2.5556776e+00   3.0584993e-01  -2.3923511e+00
   2.6172332e+01  -2.4046993e+01   3.5000000e+02  -2.4409483e+00   1.9814122e-01  -2.5884778e+00
   2.6129572e+01  -2.3924766e+01   3.5000000e+02  -2.3187981e+00   8.0122354e-02  -2.7755975e+00
   2.6081993e+01  -2.3804049e+01   3.5000000e+02  -2.1894900e+00  -4.8287613e-02  -2.9518869e+00
   2.6029673e+01  -2.3685003e+01   3.5000000e+02  -2.0534788e+00  -1.8695338e-01  -3.1154124e+00
   2.5972691e+01  -2.3567783e+01   3.5000000e+02  -1.9114216e+00  -3.3552754e-01  -3.2642118e+00
   2.5911136e+01  -2.3452546e+01   3.5000000e+02  -1.7641946e+00  -4.9344580e-01  -3.3963545e+00
   2.5845100e+01  -2.3339442e+01   3.5000000e+02  -1.6128640e+00  -6.5995474e-01  -3.5100285e+00
   2.5774679e+01  -2.3228620e+01   3.5000000e+02  -1.4586634e+00  -8.3412768e-01  -3.6035988e+00
   2.5699977e+01  -2.3120225e+01   3.5000000e+02  -1.3029586e+00  -1.0148909e+00  -3.6756607e+00
   2.5621100e+01  -2.3014399e+01   3.5000000e+02  -1.1472033e+00  -1.2010544e+00  -3.7250828e+00
   2.5538160e+01  -2.2911279e+01   3.5000000e+02  -9.9290433e-01  -1.3913396e+00  -3.7510353e+00
   2.5451275e+01  -2.2810999e+01   3.5000000e+02  -8.4158943e-01  -1.5844061e+00  -3.7530111e+00
   2.5360563e+01  -2.2713691e+01   3.5000000e+02  -6.9477129e-01  -1.7788854e+00  -3.7308384e+00
   2.5266151e+01  -2.2619479e+01   3.5000000e+02  -5.5392664e-01  -1.9734121e+00  -3.6846897e+00
   2.5168167e+01  -2.2528487e+01   3.5000000e+02  -4.2046562e-01  -2.1666566e+00  -3.6150797e+00
   2.5066744e+01  -2.2440831e+01   3.5000000e+02  -2.9570422e-01  -2.3573679e+00  -3.5228565e+00
   2.4962018e+01  -2.2356625e+01   3.5000000e+02  -1.8083503e-01  -2.5444080e+00  -3.4091805e+00
   2.4854130e+01  -2.2275976e+01   3.5000000e+02  -7.6894745e-02  -2.7267935e+00  -3.2754882e+00
   2.4743223e+01  -2.2198990e+01   3.5000000e+02   1.5270567e-02  -2.9037283e+00  -3.1234408e+00
   2.4629442e+01  -2.2125764e+01   3.5000000e+02   9.5039066e-02  -3.0746379e+00  -2.9548512e+00
   2.4512939e+01  -2.2056393e+01   3.5000000e+02   1.6203730e-01  -3.2391735e+00  -2.7716104e+00
   2.4393864e+01  -2.1990966e+01   3.5000000e+02   2.1616820e-01  -3.3972235e+00  -2.5755836e+00
   2.4272374e+01  -2.1929566e+01   3.5000000e+02   2.5761683e-01  -3.5488840e+00  -2.3685249e+00
   2.4148626e+01  -2.1872271e+01   3.5000000e+02   2.8685434e-01  -3.6944252e+00  -2.1519793e+00
   2.4022779e+01  -2.1819156e+01   3.5000000e+02   3.0462487e-01  -3.8342304e+00  -1.9272097e+00
   2.3894996e+01  -2.1770288e+01   3.5000000e+02   3.1191869e-01  -3.9687224e+00  -1.6951419e+00
   2.3765441e+01  -2.1725729e+01   3.5000000e+02   3.0993897e-01  -4.0982830e+00  -1.4563357e+00
   2.3634279e+01  -2.1685536e+01   3.5000000e+02   3.0005929e-01  -4.2231698e+00  -1.2109889e+00
   2.3501680e+01  -2.1649760e+01   3.5000000e+02   2.8377625e-01  -4.3434358e+00  -9.5898029e-01
   2.3367810e+01  -2.1618447e+01   3.5000000e+02   2.6266401e-01  -4.4588747e+00  -6.9991896e-01
   2.3232841e+01  -2.1591636e+01   3.5000000e+02   2.3832756e-01  -4.5689688e+00  -4.3324879e-01
   2.3096944e+01  -2.1569362e+01   3.5000000e+02   2.1236636e-01  -4.6728768e+00  -1.5834037e-01
   2.2960291e+01  -2.1551654e+01   3.5000000e+02   1.8634005e-01  -4.7694385e+00   1.2539630e-01
   2.2823057e+01  -2.1538532e+01   3.5000000e+02   1.6173983e-01  -4.8572053e+00   4.1839867e-01
   2.2685413e+01  -2.1530015e+01   3.5000000e+02   1.3997761e-01  -4.9345023e+00   7.2086382e-01
   2.2547535e+01  -2.1526113e+01   3.5000000e+02   1.2236633e-01  -4.9994983e+00   1.0326457e+00
   2.2409597e+01  -2.1526832e+01   3.5000000e+02   1.1011729e-01  -5.0503028e+00   1.3532035e+00
   2.2271773e+01  -2.1532169e+01   3.5000000e+02   1.0433040e-01  -5.0850681e+00   1.6815561e+00
   2.2134238e+01  -2.1542118e+01   3.5000000e+02   1.0599943e-01  -5.1020980e+00   2.0162634e+00
   2.1997165e+01  -2.1556667e+01   3.5000000e+02   1.1600695e-01  -5.0999545e+00   2.3554451e+00
   2.1860729e+01  -2.1575798e+01   3.5000000e+02   1.3512279e-01  -5.0775553e+00   2.6968079e+00
   2.1725102e+01  -2.1599485e+01   3.5000000e+02   1.6399768e-01  -5.0342560e+00   3.0377192e+00
   2.1590456e+01  -2.1627699e+01   3.5000000e+02   2.0316643e-01  -4.9699106e+00   3.3752794e+00
   2.1456963e+01  -2.1660403e+01   3.5000000e+02   2.5303458e-01  -4.8849043e+00   3.7064167e+00
   2.1324792e+01  -2.1697557e+01   3.5000000e+02   3.1387882e-01  -4.7801548e+00   4.0279952e+00
   2.1194112e+01  -2.1739113e+01   3.5000000e+02   3.8583060e-01  -4.6570850e+00   4.3369077e+00
   2.1065091e+01  -2.1785018e+01   3.5000000e+02   4.6887155e-01  -4.5175652e+00   4.6301706e+00
   2.0937892e+01  -2.1835213e+01   3.5000000e+02   5.6282245e-01  -4.3638280e+00   4.9050118e+00
   2.0812680e+01  -2.1889635e+01   3.5000000e+02   6.6733801e-01  -4.1983789e+00   5.1589143e+00
   2.0689616e+01  -2.1948213e+01   3.5000000e+02   7.8189236e-01  -4.0238850e+00   5.3896730e+00
   2.0568860e+01  -2.2010874e+01   3.5000000e+02   9.0578605e-01  -3.8430761e+00   5.5954097e+00
   2.0450568e+01  -2.2077536e+01   3.5000000e+02   1.0381326e+00  -3.6586457e+00   5.7745893e+00
   2.0334895e+01  -2.2148115e+01   3.5000000e+02   1.1778769e+00  -3.4731755e+00   5.9260094e+00
   2.0221992e+01  -2.2222520e+01   3.5000000e+02   1.3237970e+00  -3.2890687e+00   6.0487983e+00
   2.0112007e+01  -2.2300655e+01   3.5000000e+02   1.4745246e+00  -3.1085071e+00   6.1424005e+00
   2.0005087e+01  -2.2382421e+01   3.5000000e+02   1.6285719e+00  -2.9334285e+00   6.2065600e+00
   1.9901373e+01  -2.2467711e+01   3.5000000e+02   1.7843486e+00  -2.7655065e+00   6.2413216e+00
   1.9801004e+01  -2.2556416e+01   3.5000000e+02   1.9402037e+00  -2.6061584e+00   6.2470101e+00
   1.9704116e+01  -2.2648422e+01   3.5000000e+02   2.0944501e+00  -2.4565537e+00   6.2242260e+00
   1.9610841e+01  -2.2743609e+01   3.5000000e+02   2.2453931e+00  -2.3176283e+00   6.1738391e+00
   1.9521305e+01  -2.2841855e+01   3.5000000e+02   2.3913660e+00  -2.1901016e+00   6.0969719e+00
   1.9435633e+01  -2.2943031e+01   3.5000000e+02   2.5307465e+00  -2.0745056e+00   5.9949862e+00
   1.9353944e+01  -2.3047007e+01   3.5000000e+02   2.6619885e+00  -1.9712000e+00   5.8694561e+00
   1.9276353e+01  -2.3153647e+01   3.5000000e+02   2.7836316e+00  -1.8803940e+00   5.7221469e+00
   1.9202970e+01  -2.3262812e+01   3.5000000e+02   2.8943199e+00  -1.8021638e+00   5.5549767e+00
   1.9133901e+01  -2.3374359e+01   3.5000000e+02   2.9928118e+00  -1.7364683e+00   5.3699794e+00
   1.9069247e+01  -2.3488141e+01   3.5000000e+02   3.0779870e+00  -1.6831582e+00   5.1692631e+00
   1.9009104e+01  -2.3604011e+01   3.5000000e+02   3.1488550e+00  -1.6419855e+00   4.9549569e+00
   1.8953562e+01  -2.3721815e+01   3.5000000e+02   3.2045501e+00  -1.6126023e+00   4.7291853e+00
   1.8902707e+01  -2.3841398e+01   3.5000000e+02   3.2443383e+00  -1.5945688e+00   4.4940138e+00
   1.8856619e+01  -2.3962601e+01   3.5000000e+02   3.2676140e+00  -1.5873489e+00   4.2514251e+00
   1.8815371e+01  -2.4085264e+01   3.5000000e+02   3.2739014e+00  -1.5903114e+00   4.0032897e+00
   1.8779032e+01  -2.4209225e+01   3.5000000e+02   3.2628571e+00  -1.6027376e+00   3.7513519e+00
   1.8747664e+01  -2.4334317e+01   3.5000000e+02   3.2342746e+00  -1.6238196e+00   3.4972362e+00
   1.8721324e+01  -2.4460373e+01   3.5000000e+02   3.1880961e+00  -1.6526767e+00   3.2424395e+00
   1.8700062e+01  -2.4587226e+01   3.5000000e+02   3.1244240e+00  -1.6883645e+00   2.9883444e+00
   1.8683922e+01  -2.4714703e+01   3.5000000e+02   3.0435410e+00  -1.7298898e+00   2.7362455e+00
   1.8672941e+01  -2.4842634e+01   3.5000000e+02   2.9459233e+00  -1.7762322e+00   2.4873429e+00
   1.8667150e+01  -2.4970845e+01   3.5000000e+02   2.8322589e+00  -1.8263620e+00   2.2427635e+00
   1.8666572e+01  -2.5099163e+01   3.5000000e+02   2.7034509e+00  -1.8792582e+00   2.0035522e+00
   1.8671226e+01  -2.5227412e+01   3.5000000e+02   2.5606192e+00  -1.9339312e+00   1.7706660e+00
   1.8681121e+01  -2.5355419e+01   3.5000000e+02   2.4050746e+00  -1.9894293e+00   1.5449544e+00
   1.8696260e+01  -2.5483007e+01   3.5000000e+02   2.2382960e+00  -2.0448532e+00   1.3271448e+00
   1.8716639e+01  -2.5610002e+01   3.5000000e+02   2.0618751e+00  -2.0993620e+00   1.1178093e+00
   1.8742248e+01  -2.5736228e+01   3.5000000e+02   1.8774641e+00  -2.1521723e+00   9.1735036e-01
   1.8773067e+01  -2.5861510e+01   3.5000000e+02   1.6867044e+00  -2.2025491e+00   7.2598947e-01
   1.8809070e+01  -2.5985676e+01   3.5000000e+02   1.4911556e+00  -2.2498009e+00   5.4375724e-01
   1.8850225e+01  -2.6108553e+01   3.5000000e+02   1.2922372e+00  -2.2932674e+00   3.7050875e-01
   1.8896490e+01  -2.6229968e+01   3.5000000e+02   1.0911747e+00  -2.3323004e+00   2.0595316e-01
   1.8947817e+01  -2.6349751e+01   3.5000000e+02   8.8895854e-01  -2.3662576e+00   4.9682688e-02
   1.9004149e+01  -2.6467735e+01   3.5000000e+02   6.8633043e-01  -2.3944890e+00  -9.8773553e-02
   1.9065423e+01  -2.6583752e+01   3.5000000e+02   4.8379831e-01  -2.4163393e+00  -2.3989989e-01
   1.9131567e+01  -2.6697639e+01   3.5000000e+02   2.8166016e-01  -2.4311466e+00  -3.7413894e-01
   1.9202504e+01  -2.6809234e+01   3.5000000e+02   8.0061752e-02  -2.4382588e+00  -5.0185077e-01
   1.9278145e+01  -2.6918377e+01   3.5000000e+02  -1.2093505e-01  -2.4370454e+00  -6.2326672e-01
   1.9358398e+01  -2.7024914e+01   3.5000000e+02  -3.2128768e-01  -2.4269240e+00  -7.3848544e-01
   1.9443161e+01  -2.7128690e+01   3.5000000e+02  -5.2088627e-01  -2.4073822e+00  -8.4745949e-01
   1.9532325e+01  -2.7229558e+01   3.5000000e+02  -7.1950465e-01  -2.3779948e+00  -9.5001258e-01
   1.9625774e+01  -2.7327370e+01   3.5000000e+02  -9.1673987e-01  -2.3384442e+00  -1.0458701e+00
   1.9723385e+01  -2.7421987e+01   3.5000000e+02  -1.1120004e+00  -2.2885191e+00  -1.1346887e+00
   1.9825027e+01  -2.7513269e+01   3.5000000e+02  -1.3044879e+00  -2.2281171e+00  -1.2160975e+00
   1.9930563e+01  -2.7601086e+01   3.5000000e+02  -1.4932332e+00  -2.1572227e+00  -1.2897229e+00
   2.0039849e+01  -2.7685307e+01   3.5000000e+02  -1.6771174e+00  -2.0758932e+00  -1.3552166e+00
   2.0152735e+01  -2.7765810e+01   3.5000000e+02  -1.8549371e+00  -1.9842253e+00  -1.4122518e+00
   2.0269062e+01  -2.7842477e+01   3.5000000e+02  -2.0254511e+00  -1.8823348e+00  -1.4605131e+00
   2.0388669e+01  -2.7915196e+01   3.5000000e+02  -2.1874450e+00  -1.7703346e+00  -1.4996795e+00
   2.0511386e+01  -2.7983857e+01   3.5000000e+02  -2.3397723e+00  -1.6483319e+00  -1.5293872e+00
   2.0637038e+01  -2.8048361e+01   3.5000000e+02  -2.4814088e+00  -1.5164259e+00  -1.5491860e+00
   2.0765445e+01  -2.8108612e+01   3.5000000e+02  -2.6114745e+00  -1.3747330e+00  -1.5585189e+00
   2.0896422e+01  -2.8164520e+01   3.5000000e+02  -2.7292584e+00  -1.2234189e+00  -1.5566962e+00
   2.1029779e+01  -2.8216002e+01   3.5000000e+02  -2.8342314e+00  -1.0627420e+00  -1.5428879e+00
   2.1696587e+01  -2.8530550e+01   3.5000000e+02  -3.1939246e+00  -1.5717388e-01  -9.9149940e-01
   2.1840388e+01  -2.8554221e+01   3.5000000e+02  -3.2139151e+00   3.3918459e-02  -8.9033126e-01
   2.1985113e+01  -2.8573223e+01   3.5000000e+02  -3.2226610e+00   2.2666615e-01  -7.7164181e-01
   2.2130560e+01  -2.8587531e+01   3.5000000e+02  -3.2210967e+00   4.1873820e-01  -6.3514957e-01
   2.2276525e+01  -2.8597124e+01   3.5000000e+02  -3.2103242e+00   6.0754848e-01  -4.8104114e-01
   2.2422804e+01  -2.8601989e+01   3.5000000e+02  -3.1915940e+00   7.9034928e-01  -3.1003772e-01
   2.2569191e+01  -2.8602118e+01   3.5000000e+02  -3.1662768e+00   9.6434634e-01  -1.2345160e-01
   2.2715481e+01  -2.8597512e+01   3.5000000e+02  -3.1358242e+00   1.1268373e+00   7.6814715e-02
   2.2861468e+01  -2.8588178e+01   3.5000000e+02  -3.1017251e+00   1.2753514e+00   2.8829217e-01
   2.3006949e+01  -2.8574127e+01   3.5000000e+02  -3.0654557e+00   1.4077878e+00   5.0802360e-01
   2.3151719e+01  -2.8555381e+01   3.5000000e+02  -3.0284294e+00   1.5225211e+00   7.3268362e-01
   2.3295575e+01  -2.8531965e+01   3.5000000e+02  -2.9919523e+00   1.6184871e+00   9.5871242e-01
   2.3438319e+01  -2.8503913e+01   3.5000000e+02  -2.9571815e+00   1.6952206e+00   1.1824911e+00
   2.3579750e+01  -2.8471263e+01   3.5000000e+02  -2.9251027e+00   1.7528490e+00   1.4004747e+00
   2.3719672e+01  -2.8434062e+01   3.5000000e+02  -2.8965093e+00   1.7920519e+00   1.6093594e+00
   2.3857891e+01  -2.8392362e+01   3.5000000e+02  -2.8720022e+00   1.8139853e+00   1.8061859e+00
   2.3994218e+01  -2.8346222e+01   3.5000000e+02  -2.8519964e+00   1.8201827e+00   1.9884316e+00
   2.4128466e+01  -2.8295705e+01   3.5000000e+02  -2.8367406e+00   1.8124482e+00   2.1540453e+00
   2.4260450e+01  -2.8240882e+01   3.5000000e+02  -2.8263371e+00   1.7927472e+00   2.3014650e+00
   2.4389991e+01  -2.8181830e+01   3.5000000e+02  -2.8207677e+00   1.7631067e+00   2.4296022e+00
   2.4516915e+01  -2.8118631e+01   3.5000000e+02  -2.8199200e+00   1.7255319e+00   2.5377967e+00
   2.4641050e+01  -2.8051372e+01   3.5000000e+02  -2.8236139e+00   1.6819415e+00   2.6257553e+00
   2.4762232e+01  -2.7980147e+01   3.5000000e+02  -2.8316176e+00   1.6341167e+00   2.6935029e+00
   2.4880300e+01  -2.7905054e+01   3.5000000e+02  -2.8436711e+00   1.5836740e+00   2.7413074e+00
   2.4995099e+01  -2.7826197e+01   3.5000000e+02  -2.8594959e+00   1.5320450e+00   2.7696299e+00
   2.5106478e+01  -2.7743684e+01   3.5000000e+02  -2.8788092e+00   1.4804693e+00   2.7790682e+00
   2.5214294e+01  -2.7657628e+01   3.5000000e+02  -2.9013261e+00   1.4299882e+00   2.7703204e+00
   2.5318409e+01  -2.7568147e+01   3.5000000e+02  -2.9267641e+00   1.3814466e+00   2.7441433e+00
   2.5418691e+01  -2.7475363e+01   3.5000000e+02  -2.9548400e+00   1.3354947e+00   2.7013208e+00
   2.5515015e+01  -2.7379402e+01   3.5000000e+02  -2.9852620e+00   1.2925902e+00   2.6426373e+00
   2.5607260e+01  -2.7280395e+01   3.5000000e+02  -3.0177163e+00   1.2530067e+00   2.5688533e+00
   2.5695315e+01  -2.7178474e+01   3.5000000e+02  -3.0518495e+00   1.2168407e+00   2.4806875e+00
   2.5779072e+01  -2.7073779e+01   3.5000000e+02  -3.0872452e+00   1.1840293e+00   2.3788101e+00
   2.5858433e+01  -2.6966448e+01   3.5000000e+02  -3.1234059e+00   1.1543689e+00   2.2638317e+00
   2.5933304e+01  -2.6856627e+01   3.5000000e+02  -3.1597312e+00   1.1275419e+00   2.1363228e+00
   2.6003599e+01  -2.6744461e+01   3.5000000e+02  -3.1955107e+00   1.1031452e+00   1.9968206e+00
   2.6069240e+01  -2.6630099e+01   3.5000000e+02  -3.2299223e+00   1.0807174e+00   1.8458651e+00
   2.6130153e+01  -2.6513695e+01   3.5000000e+02  -3.2620483e+00   1.0597694e+00   1.6840279e+00
   2.6186274e+01  -2.6395400e+01   3.5000000e+02  -3.2909057e+00   1.0398044e+00   1.5119343e+00
   2.6237544e+01  -2.6275372e+01   3.5000000e+02  -3.3154851e+00   1.0203362e+00   1.3303017e+00
   2.6283911e+01  -2.6153767e+01   3.5000000e+02  -3.3348023e+00   1.0008979e+00   1.1399387e+00
   2.6325330e+01  -2.6030745e+01   3.5000000e+02  -3.3479482e+00   9.8104352e-01   9.4175778e-01
   2.6361764e+01  -2.5906467e+01   3.5000000e+02  -3.3541378e+00   9.6034244e-01   7.3675725e-01
   2.6393181e+01  -2.5781093e+01   3.5000000e+02  -3.3527476e+00   9.3837187e-01   5.2598858e-01
   2.6419557e+01  -2.5654786e+01   3.5000000e+02  -3.3433393e+00   9.1470139e-01   3.1053289e-01
   2.6440874e+01  -2.5527710e+01   3.5000000e+02  -3.3256661e+00   8.8887973e-01   9.1456448e-02
   2.6457122e+01  -2.5400027e+01   3.5000000e+02  -3.2996602e+00   8.6041903e-01  -1.3022944e-01
   2.6468295e+01  -2.5271901e+01   3.5000000e+02  -3.2654050e+00   8.2878506e-01  -3.5359427e-01
   2.6474395e+01  -2.5143497e+01   3.5000000e+02  -3.2230934e+00   7.9338713e-01  -5.7780284e-01
   2.6475432e+01  -2.5014978e+01   3.5000000e+02  -3.1729774e+00   7.5357473e-01  -8.0212138e-01
   2.6471419e+01  -2.4886507e+01   3.5000000e+02  -3.1153162e+00   7.0864295e-01  -1.0259019e+00
   2.6462377e+01  -2.4758246e+01   3.5000000e+02  -3.0503296e+00   6.5784092e-01  -1.2485440e+00
   2.6448333e+01  -2.4630359e+01   3.5000000e+02  -2.9781653e+00   6.0039217e-01  -1.4694425e+00
   2.6429320e+01  -2.4503005e+01   3.5000000e+02  -2.8988778e+00   5.3551693e-01  -1.6879415e+00
   2.6405378e+01  -2.4376344e+01   3.5000000e+02  -2.8124351e+00   4.6246641e-01  -1.9032634e+00
   2.6376549e+01  -2.4250535e+01   3.5000000e+02  -2.7187396e+00   3.8055808e-01  -2.1144656e+00
   2.6342885e+01  -2.4125735e+01   3.5000000e+02  -2.6176745e+00   2.8921236e-01  -2.3203963e+00
   2.6304441e+01  -2.4002099e+01   3.5000000e+02  -2.5091545e+00   1.8798848e-01  -2.5196865e+00
   2.6261278e+01  -2.3879780e+01   3.5000000e+02  -2.3931862e+00   7.6615071e-02  -2.7107562e+00
   2.6213463e+01  -2.3758931e+01   3.5000000e+02  -2.2699246e+00  -4.4985021e-02  -2.8918472e+00
   2.6161066e+01  -2.3639699e+01   3.5000000e+02  -2.1397083e+00  -1.7668822e-01  -3.0610870e+00
   2.6104165e+01  -2.3522232e+01   3.5000000e+02  -2.0030931e+00  -3.1816045e-01  -3.2165449e+00
   2.6042840e+01  -2.3406674e+01   3.5000000e+02  -1.8608487e+00  -4.6887172e-01  -3.3563160e+00
   2.5977179e+01  -2.3293167e+01   3.5000000e+02  -1.7139525e+00  -6.2810751e-01  -3.4785863e+00
   2.5907270e+01  -2.3181849e+01   3.5000000e+02  -1.5635536e+00  -7.9499652e-01  -3.5817008e+00
   2.5833210e+01  -2.3072856e+01   3.5000000e+02  -1.4109483e+00  -9.6852742e-01  -3.6642086e+00
   2.5755099e+01  -2.2966321e+01   3.5000000e+02  -1.2575357e+00  -1.1475780e+00  -3.7249067e+00
   2.5673039e+01  -2.2862374e+01   3.5000000e+02  -1.1047799e+00  -1.3309407e+00  -3.7628679e+00
   2.5587139e+01  -2.2761140e+01   3.5000000e+02  -9.5418193e-01  -1.5173450e+00  -3.7774631e+00
   2.5497509e+01  -2.2662741e+01   3.5000000e+02  -8.0724658e-01  -1.7054847e+00  -3.7683760e+00
   2.5404267e+01  -2.2567298e+01   3.5000000e+02  -6.6546469e-01  -1.8940356e+00  -3.7356178e+00
   2.5307530e+01  -2.2474924e+01   3.5000000e+02  -5.3027556e-01  -2.0817014e+00  -3.6795317e+00
   2.5207421e+01  -2.2385731e+01   3.5000000e+02  -4.0305164e-01  -2.2672327e+00  -3.6007954e+00
   2.5104067e+01  -2.2299826e+01   3.5000000e+02  -2.8506530e-01  -2.4494706e+00  -3.5004111e+00
   2.4997595e+01  -2.2217313e+01   3.5000000e+02  -1.7745441e-01  -2.6273878e+00  -3.3796798e+00
   2.4888140e+01  -2.2138290e+01   3.5000000e+02  -8.1194044e-02  -2.8001220e+00  -3.2401674e+00
   2.4775834e+01  -2.2062851e+01   3.5000000e+02   2.9455650e-03  -2.9670197e+00  -3.0836391e+00
   2.4660818e+01  -2.1991088e+01   3.5000000e+02   7.4422069e-02  -3.1276484e+00  -2.9119985e+00
   2.4543230e+01  -2.1923085e+01   3.5000000e+02   1.3295578e-01  -3.2818254e+00  -2.7271849e+00
   2.4423215e+01  -2.1858924e+01   3.5000000e+02   1.7854068e-01  -3.4295994e+00  -2.5310914e+00
   2.4300916e+01  -2.1798682e+01   3.5000000e+02   2.1145624e-01  -3.5712361e+00  -2.3254539e+00
   2.4176483e+01  -2.1742429e+01   3.5000000e+02   2.3225685e-01  -3.7071657e+00  -2.1117711e+00
   2.4050064e+01  -2.1690233e+01   3.5000000e+02   2.4175835e-01  -3.8379257e+00  -1.8912199e+00
   2.3921812e+01  -2.1642156e+01   3.5000000e+02   2.4100510e-01  -3.9640782e+00  -1.6646106e+00
   2.3791878e+01  -2.1598255e+01   3.5000000e+02   2.3123290e-01  -4.0861301e+00  -1.4323550e+00
   2.3660419e+01  -2.1558582e+01   3.5000000e+02   2.1382306e-01  -4.2044403e+00  -1.1944877e+00
   2.3527589e+01  -2.1523184e+01   3.5000000e+02   1.9025643e-01  -4.3191494e+00  -9.5069391e-01
   2.3393548e+01  -2.1492103e+01   3.5000000e+02   1.6206729e-01  -4.4301087e+00  -7.0039316e-01
   2.3258453e+01  -2.1465376e+01   3.5000000e+02   1.3080194e-01  -4.5368452e+00  -4.4281643e-01
   2.3122465e+01  -2.1443035e+01   3.5000000e+02   9.7983628e-02  -4.6385371e+00  -1.7712486e-01
   2.2985743e+01  -2.1425105e+01   3.5000000e+02   6.5082524e-02  -4.7340254e+00   9.7488523e-02
   2.2848449e+01  -2.1411609e+01   3.5000000e+02   3.3500543e-02  -4.8218430e+00   3.8167676e-01
   2.2710745e+01  -2.1402561e+01   3.5000000e+02   4.5514974e-03  -4.9002720e+00   6.7584311e-01
   2.2572793e+01  -2.1397974e+01   3.5000000e+02  -2.0538253e-02  -4.9674207e+00   9.8005276e-01
   2.2434756e+01  -2.1397852e+01   3.5000000e+02  -4.0640494e-02  -5.0213127e+00   1.2939635e+00
   2.2296795e+01  -2.1402195e+01   3.5000000e+02  -5.4720430e-02  -5.0599924e+00   1.6167883e+00
   2.2159073e+01  -2.1410999e+01   3.5000000e+02  -6.1834404e-02  -5.0816303e+00   1.9472678e+00
   2.2021753e+01  -2.1424252e+01   3.5000000e+02  -6.1133742e-02  -5.0846308e+00   2.2836825e+00
   2.1884995e+01  -2.1441940e+01   3.5000000e+02  -5.1857309e-02  -5.0677326e+00   2.6238956e+00
   2.1748963e+01  -2.1464041e+01   3.5000000e+02  -3.3339561e-02  -5.0300936e+00   2.9653924e+00
   2.1613815e+01  -2.1490528e+01   3.5000000e+02  -5.0109953e-03  -4.9713553e+00   3.3053847e+00
   2.1479712e+01  -2.1521372e+01   3.5000000e+02   3.3602387e-02  -4.8916848e+00   3.6408815e+00
   2.1346812e+01  -2.1556535e+01   3.5000000e+02   8.2861702e-02  -4.7917820e+00   3.9688042e+00
   2.1215274e+01  -2.1595975e+01   3.5000000e+02   1.4301426e-01  -4.6728629e+00   4.2860797e+00
   2.1085253e+01  -2.1639647e+01   3.5000000e+02   2.1418586e-01  -4.5366052e+00   4.5897473e+00
   2.0956904e+01  -2.1687497e+01   3.5000000e+02   2.9636042e-01  -4.3850772e+00   4.8770297e+00
   2.0830381e+01  -2.1739469e+01   3.5000000e+02   3.8938053e-01  -4.2206451e+00   5.1454002e+00
   2.0705835e+01  -2.1795501e+01   3.5000000e+02   4.9293009e-01  -4.0458677e+00   5.3926295e+00
   2.0583416e+01  -2.1855528e+01   3.5000000e+02   6.0653056e-01  -3.8633961e+00   5.6168044e+00
   2.0463272e+01  -2.1919476e+01   3.5000000e+02   7.2952333e-01  -3.6758766e+00   5.8163375e+00
   2.0345548e+01  -2.1987271e+01   3.5000000e+02   8.6108443e-01  -3.4858662e+00   5.9899609e+00
   2.0230387e+01  -2.2058831e+01   3.5000000e+02   1.0002128e+00  -3.2957691e+00   6.1367115e+00
   2.0117930e+01  -2.2134070e+01   3.5000000e+02   1.1457476e+00  -3.1077896e+00   6.2559131e+00
   2.0008315e+01  -2.2212900e+01   3.5000000e+02   1.2963882e+00  -2.9239027e+00   6.3471597e+00
   1.9901677e+01  -2.2295225e+01   3.5000000e+02   1.4507042e+00  -2.7458399e+00   6.4103042e+00
   1.9798149e+01  -2.2380947e+01   3.5000000e+02   1.6071741e+00  -2.5750911e+00   6.4454428e+00
   1.9697859e+01  -2.2469962e+01   3.5000000e+02   1.7642057e+00  -2.4129082e+00   6.4529136e+00
   1.9600935e+01  -2.2562165e+01   3.5000000e+02   1.9201770e+00  -2.2603294e+00   6.4332798e+00
   1.9507498e+01  -2.2657444e+01   3.5000000e+02   2.0734528e+00  -2.1181852e+00   6.3873365e+00
   1.9417668e+01  -2.2755684e+01   3.5000000e+02   2.2224204e+00  -1.9871298e+00   6.3160938e+00
   1.9331561e+01  -2.2856766e+01   3.5000000e+02   2.3655114e+00  -1.8676569e+00   6.2207689e+00
   1.9249288e+01  -2.2960568e+01   3.5000000e+02   2.5012232e+00  -1.7601175e+00   6.1027704e+00
   1.9170958e+01  -2.3066965e+01   3.5000000e+02   2.6281369e+00  -1.6647426e+00   5.9636753e+00
   1.9096674e+01  -2.3175827e+01   3.5000000e+02   2.7449268e+00  -1.5816506e+00   5.8052101e+00
   1.9026536e+01  -2.3287021e+01   3.5000000e+02   2.8503746e+00  -1.5108638e+00   5.6292157e+00
   1.8960640e+01  -2.3400412e+01   3.5000000e+02   2.9433785e+00  -1.4523147e+00   5.4376111e+00
   1.8899076e+01  -2.3515861e+01   3.5000000e+02   3.0229544e+00  -1.4058455e+00   5.2323626e+00
   1.8841930e+01  -2.3633227e+01   3.5000000e+02   3.0882419e+00  -1.3712124e+00   5.0154408e+00
   1.8789285e+01  -2.3752366e+01   3.5000000e+02   3.1385044e+00  -1.3480856e+00   4.7887862e+00
   1.8741217e+01  -2.3873132e+01   3.5000000e+02   3.1731266e+00  -1.3360396e+00   4.5542788e+00
   1.8697798e+01  -2.3995374e+01   3.5000000e+02   3.1916133e+00  -1.3345542e+00   4.3137169e+00
   1.8659095e+01  -2.4118942e+01   3.5000000e+02   3.1935909e+00  -1.3430163e+00   4.0687885e+00
   1.8625168e+01  -2.4243682e+01   3.5000000e+02   3.1788050e+00  -1.3607159e+00   3.8210764e+00
   1.8596073e+01  -2.4369440e+01   3.5000000e+02   3.1471286e+00  -1.3868608e+00   3.5720485e+00
   1.8571862e+01  -2.4496058e+01   3.5000000e+02   3.0985711e+00  -1.4205849e+00   3.3230746e+00
   1.8552579e+01  -2.4623378e+01   3.5000000e+02   3.0332902e+00  -1.4609586e+00   3.0754338e+00
   1.8538262e+01  -2.4751241e+01   3.5000000e+02   2.9516095e+00  -1.5070090e+00   2.8303279e+00
   1.8528946e+01  -2.4879485e+01   3.5000000e+02   2.8540386e+00  -1.5577435e+00   2.5888911e+00
   1.8524657e+01  -2.5007949e+01   3.5000000e+02   2.7412815e+00  -1.6121618e+00   2.3521914e+00
   1.8525417e+01  -2.5136470e+01   3.5000000e+02   2.6142473e+00  -1.6692815e+00   2.1212250e+00
   1.8531240e+01  -2.5264884e+01   3.5000000e+02   2.4740444e+00  -1.7281490e+00   1.8969055e+00
   1.8542136e+01  -2.5393029e+01   3.5000000e+02   2.3219600e+00  -1.7878607e+00   1.6800334e+00
   1.8558106e+01  -2.5520741e+01   3.5000000e+02   2.1594306e+00  -1.8475627e+00   1.4712846e+00
   1.8579146e+01  -2.5647854e+01   3.5000000e+02   1.9879977e+00  -1.9064619e+00   1.2711805e+00
   1.8605246e+01  -2.5774207e+01   3.5000000e+02   1.8092405e+00  -1.9638256e+00   1.0800591e+00
   1.8636388e+01  -2.5899636e+01   3.5000000e+02   1.6247218e+00  -2.0189706e+00   8.9807756e-01
   1.8672548e+01  -2.6023979e+01   3.5000000e+02   1.4359159e+00  -2.0712580e+00   7.2520218e-01
   1.8713696e+01  -2.6147074e+01   3.5000000e+02   1.2441501e+00  -2.1200797e+00   5.6122415e-01
   1.8759793e+01  -2.6268760e+01   3.5000000e+02   1.0505533e+00  -2.1648409e+00   4.0578972e-01
   1.8810796e+01  -2.6388879e+01   3.5000000e+02   8.5601881e-01  -2.2049540e+00   2.5843083e-01
   1.8866653e+01  -2.6507272e+01   3.5000000e+02   6.6119783e-01  -2.2398231e+00   1.1862400e-01
   1.8927306e+01  -2.6623784e+01   3.5000000e+02   4.6650093e-01  -2.2688432e+00  -1.4164053e-02
   1.8992690e+01  -2.6738261e+01   3.5000000e+02   2.7213462e-01  -2.2914016e+00  -1.4042084e-01
   1.9062733e+01  -2.6850551e+01   3.5000000e+02   7.8151242e-02  -2.3068880e+00  -2.6054305e-01
   1.9137356e+01  -2.6960505e+01   3.5000000e+02  -1.1548667e-01  -2.3147096e+00  -3.7480244e-01
   1.9216473e+01  -2.7067975e+01   3.5000000e+02  -3.0882993e-01  -2.3143131e+00  -4.8332740e-01
   1.9299993e+01  -2.7172819e+01   3.5000000e+02  -5.0187775e-01  -2.3052053e+00  -5.8610368e-01
   1.9387815e+01  -2.7274895e+01   3.5000000e+02  -6.9450124e-01  -2.2869743e+00  -6.8298229e-01
   1.9479834e+01  -2.7374065e+01   3.5000000e+02  -8.8640207e-01  -2.2593067e+00  -7.7371755e-01
   1.9575937e+01  -2.7470196e+01   3.5000000e+02  -1.0770810e+00  -2.2219926e+00  -8.5799677e-01
   1.9676006e+01  -2.7563157e+01   3.5000000e+02  -1.2658276e+00  -2.1749269e+00  -9.3548701e-01
   1.9779915e+01  -2.7652821e+01   3.5000000e+02  -1.4517353e+00  -2.1180944e+00  -1.0058653e+00
   1.9887532e+01  -2.7739068e+01   3.5000000e+02  -1.6337392e+00  -2.0515475e+00  -1.0688441e+00
   1.9998720e+01  -2.7821778e+01   3.5000000e+02  -1.8106563e+00  -1.9753845e+00  -1.1241909e+00
   2.0113335e+01  -2.7900838e+01   3.5000000e+02  -1.9812478e+00  -1.8897153e+00  -1.1717124e+00
   2.0231228e+01  -2.7976139e+01   3.5000000e+02  -2.1442736e+00  -1.7946394e+00  -1.2112386e+00
   2.0352244e+01  -2.8047578e+01   3.5000000e+02  -2.2985463e+00  -1.6902275e+00  -1.2425843e+00
   2.0476222e+01  -2.8115056e+01   3.5000000e+02  -2.4429724e+00  -1.5765185e+00  -1.2655109e+00
   2.0602998e+01  -2.8178480e+01   3.5000000e+02  -2.5765891e+00  -1.4535260e+00  -1.2796852e+00
   2.0732401e+01  -2.8237761e+01   3.5000000e+02  -2.6985816e+00  -1.3212651e+00  -1.2846427e+00
   2.0864256e+01  -2.8292817e+01   3.5000000e+02  -2.8083000e+00  -1.1797854e+00  -1.2797622e+00
   2.0998384e+01  -2.8343571e+01   3.5000000e+02  -2.9052627e+00  -1.0292189e+00  -1.2642614e+00
   2.1134602e+01  -2.8389953e+01   3.5000000e+02  -2.9891598e+00  -8.6983184e-01  -1.2372029e+00
   2.1272723e+01  -2.8431898e+01   3.5000000e+02  -3.0598523e+00  -7.0208194e-01  -1.1975279e+00
   2.1412557e+01  -2.8469346e+01   3.5000000e+02  -3.1173738e+00  -5.2667138e-01  -1.1441047e+00
   2.1553910e+01  -2.8502246e+01   3.5000000e+02  -3.1619349e+00  -3.4459470e-01  -1.0757852e+00
   2.2269128e+01  -2.8725255e+01   3.5000000e+02  -3.2005959e+00   5.8016131e-01  -2.1807094e-01
   2.2415792e+01  -2.8730185e+01   3.5000000e+02  -3.1729214e+00   7.5652892e-01  -5.3631753e-02
   2.2562566e+01  -2.8730523e+01   3.5000000e+02  -3.1385318e+00   9.2485543e-01   1.2633516e-01
   2.2709259e+01  -2.8726270e+01   3.5000000e+02  -3.0988850e+00   1.0824450e+00   3.2017462e-01
   2.2855675e+01  -2.8717431e+01   3.5000000e+02  -3.0555014e+00   1.2267945e+00   5.2565153e-01
   2.3001624e+01  -2.8704018e+01   3.5000000e+02  -3.0099096e+00   1.3557391e+00   7.4003566e-01
   2.3146912e+01  -2.8686049e+01   3.5000000e+02  -2.9635984e+00   1.4675588e+00   9.6018726e-01
   2.3291350e+01  -2.8663546e+01   3.5000000e+02  -2.9179642e+00   1.5610728e+00   1.1827013e+00
   2.3434748e+01  -2.8636541e+01   3.5000000e+02  -2.8742663e+00   1.6356812e+00   1.4040593e+00
   2.3576918e+01  -2.8605068e+01   3.5000000e+02  -2.8335954e+00   1.6913768e+00   1.6207758e+00
   2.3717676e+01  -2.8569169e+01   3.5000000e+02  -2.7968479e+00   1.7287100e+00   1.8295574e+00
   2.3856838e+01  -2.8528892e+01   3.5000000e+02  -2.7647191e+00   1.7487218e+00   2.0274144e+00
   2.3994225e+01  -2.8484289e+01   3.5000000e+02  -2.7377061e+00   1.7528549e+00   2.2117580e+00
   2.4129659e+01  -2.8435419e+01   3.5000000e+02  -2.7161206e+00   1.7428475e+00   2.3804539e+00
   2.4262966e+01  -2.8382346e+01   3.5000000e+02  -2.7001106e+00   1.7206271e+00   2.5318462e+00
   2.4393977e+01  -2.8325140e+01   3.5000000e+02  -2.6896838e+00   1.6882091e+00   2.6647498e+00
   2.4522525e+01  -2.8263874e+01   3.5000000e+02  -2.6847396e+00   1.6476124e+00   2.7784067e+00
   2.4648447e+01  -2.8198630e+01   3.5000000e+02  -2.6850885e+00   1.6007861e+00   2.8724480e+00
   2.4771586e+01  -2.8129492e+01   3.5000000e+02  -2.6904824e+00   1.5495612e+00   2.9468265e+00
   2.4891788e+01  -2.8056549e+01   3.5000000e+02  -2.7006342e+00   1.4956164e+00   3.0017560e+00
   2.5008905e+01  -2.7979897e+01   3.5000000e+02  -2.7152321e+00   1.4404546e+00   3.0376607e+00
   2.5122793e+01  -2.7899633e+01   3.5000000e+02  -2.7339609e+00   1.3853979e+00   3.0551121e+00
   2.5233313e+01  -2.7815863e+01   3.5000000e+02  -2.7565046e+00   1.3315777e+00   3.0547977e+00
   2.5340333e+01  -2.7728693e+01   3.5000000e+02  -2.7825606e+00   1.2799373e+00   3.0374719e+00
   2.5443724e+01  -2.7638234e+01   3.5000000e+02  -2.8118400e+00   1.2312321e+00   3.0039253e+00
   2.5543365e+01  -2.7544604e+01   3.5000000e+02  -2.8440606e+00   1.1860251e+00   2.9549647e+00
   2.5639139e+01  -2.7447920e+01   3.5000000e+02  -2.8789475e+00   1.1446961e+00   2.8913686e+00
   2.5730936e+01  -2.7348306e+01   3.5000000e+02  -2.9162101e+00   1.1074395e+00   2.8138797e+00
   2.5818651e+01  -2.7245887e+01   3.5000000e+02  -2.9555274e+00   1.0742780e+00   2.7231736e+00
   2.5902185e+01  -2.7140794e+01   3.5000000e+02  -2.9965188e+00   1.0450739e+00   2.6198562e+00
   2.5981446e+01  -2.7033159e+01   3.5000000e+02  -3.0387219e+00   1.0195516e+00   2.5044543e+00
   2.6056348e+01  -2.6923116e+01   3.5000000e+02  -3.0815695e+00   9.9732393e-01   2.3774246e+00
   2.6126811e+01  -2.6810803e+01   3.5000000e+02  -3.1243730e+00   9.7792183e-01   2.2391784e+00
   2.6192761e+01  -2.6696360e+01   3.5000000e+02  -3.1663209e+00   9.6082605e-01   2.0901093e+00
   2.6254129e+01  -2.6579929e+01   3.5000000e+02  -3.2064903e+00   9.4549711e-01   1.9306281e+00
   2.6310856e+01  -2.6461654e+01   3.5000000e+02  -3.2438729e+00   9.3139591e-01   1.7612060e+00
   2.6362886e+01  -2.6341682e+01   3.5000000e+02  -3.2774176e+00   9.1800718e-01   1.5824013e+00
   2.6410170e+01  -2.6220159e+01   3.5000000e+02  -3.3060822e+00   9.0484734e-01   1.3948780e+00
   2.6452665e+01  -2.6097235e+01   3.5000000e+02  -3.3288869e+00   8.9146663e-01   1.1994219e+00
   2.6490336e+01  -2.5973060e+01   3.5000000e+02  -3.3449689e+00   8.7744408e-01   9.9692655e-01
   2.6523153e+01  -2.5847785e+01   3.5000000e+02  -3.3536271e+00   8.6237914e-01   7.8837020e-01
   2.6551090e+01  -2.5721561e+01   3.5000000e+02  -3.3543525e+00   8.4587792e-01   5.7477827e-01
   2.6574131e+01  -2.5594542e+01   3.5000000e+02  -3.3468424e+00   8.2753358e-01   3.5719403e-01
   2.6592264e+01  -2.5466880e+01   3.5000000e+02  -3.3309946e+00   8.0691379e-01   1.3662072e-01
   2.6605482e+01  -2.5338729e+01   3.5000000e+02  -3.3068843e+00   7.8354548e-01  -8.6007812e-02
   2.6613785e+01  -2.5210243e+01   3.5000000e+02  -3.2747243e+00   7.5690247e-01  -3.0985669e-01
   2.6617180e+01  -2.5081574e+01   3.5000000e+02  -3.2348142e+00   7.2639861e-01  -5.3420675e-01
   2.6615678e+01  -2.4952875e+01   3.5000000e+02  -3.1874837e+00   6.9138843e-01  -7.5844771e-01
   2.6609296e+01  -2.4824299e+01   3.5000000e+02  -3.1330376e+00   6.5117190e-01  -9.8205490e-01
   2.6598056e+01  -2.4695999e+01   3.5000000e+02  -3.0717084e+00   6.0500768e-01  -1.2045497e+00
   2.6581987e+01  -2.4568124e+01   3.5000000e+02  -3.0036219e+00   5.5213108e-01  -1.4254494e+00
   2.6561123e+01  -2.4440827e+01   3.5000000e+02  -2.9287881e+00   4.9178464e-01  -1.6441944e+00
   2.6535501e+01  -2.4314254e+01   3.5000000e+02  -2.8471034e+00   4.2324531e-01  -1.8601058e+00
   2.6505167e+01  -2.4188555e+01   3.5000000e+02  -2.7583902e+00   3.4586482e-01  -2.0723093e+00
   2.6470168e+01  -2.4063876e+01   3.5000000e+02  -2.6624381e+00   2.5910213e-01  -2.2797198e+00
   2.6430559e+01  -2.3940361e+01   3.5000000e+02  -2.5590685e+00   1.6255754e-01  -2.4810182e+00
   2.6386398e+01  -2.3818154e+01   3.5000000e+02  -2.4481972e+00   5.6001601e-02  -2.6746658e+00
   2.6337749e+01  -2.3697395e+01   3.5000000e+02  -2.3298905e+00  -6.0608440e-02  -2.8589442e+00
   2.6284679e+01  -2.3578225e+01   3.5000000e+02  -2.2044103e+00  -1.8711635e-01  -3.0320078e+00
   2.6227262e+01  -2.3460779e+01   3.5000000e+02  -2.0722377e+00  -3.2317324e-01  -3.1919576e+00
   2.6165574e+01  -2.3345193e+01   3.5000000e+02  -1.9340784e+00  -4.6824363e-01  -3.3369091e+00
   2.6099696e+01  -2.3231599e+01   3.5000000e+02  -1.7908484e+00  -6.2162670e-01  -3.4650643e+00
   2.6029713e+01  -2.3120126e+01   3.5000000e+02  -1.6436468e+00  -7.8247752e-01  -3.5747699e+00
   2.5955714e+01  -2.3010902e+01   3.5000000e+02  -1.4937227e+00  -9.4982779e-01  -3.6645628e+00
   2.5877794e+01  -2.2904050e+01   3.5000000e+02  -1.3424370e+00  -1.1226108e+00  -3.7332093e+00
   2.5796047e+01  -2.2799692e+01   3.5000000e+02  -1.1912236e+00  -1.2996825e+00  -3.7797304e+00
   2.5710576e+01  -2.2697946e+01   3.5000000e+02  -1.0415655e+00  -1.4798368e+00  -3.8034224e+00
   2.5621484e+01  -2.2598927e+01   3.5000000e+02  -8.9496053e-01  -1.6618303e+00  -3.8038757e+00
   2.5528878e+01  -2.2502747e+01   3.5000000e+02  -7.5290045e-01  -1.8443998e+00  -3.7809890e+00
   2.5432870e+01  -2.2409513e+01   3.5000000e+02  -6.1684794e-01  -2.0262880e+00  -3.7349830e+00
   2.5333573e+01  -2.2319331e+01   3.5000000e+02  -4.8820951e-01  -2.2062716e+00  -3.6664064e+00
   2.5231104e+01  -2.2232302e+01   3.5000000e+02  -3.6830838e-01  -2.3831973e+00  -3.5761363e+00
   2.5125583e+01  -2.2148524e+01   3.5000000e+02  -2.5835300e-01  -2.5560185e+00  -3.4653648e+00
   2.5017132e+01  -2.2068090e+01   3.5000000e+02  -1.5940155e-01  -2.7238385e+00  -3.3355696e+00
   2.4905878e+01  -2.1991089e+01   3.5000000e+02  -7.2329556e-02  -2.8859449e+00  -3.1884703e+00
   2.4791947e+01  -2.1917609e+01   3.5000000e+02   2.2075009e-03  -3.0418465e+00  -3.0259600e+00
   2.4675470e+01  -2.1847731e+01   3.5000000e+02   6.3799985e-02  -3.1912942e+00  -2.8500275e+00
   2.4556580e+01  -2.1781533e+01   3.5000000e+02   1.1230688e-01  -3.3342887e+00  -2.6626622e+00
   2.4435411e+01  -2.1719088e+01   3.5000000e+02   1.4786722e-01  -3.4710706e+00  -2.4657514e+00
   2.4312100e+01  -2.1660467e+01   3.5000000e+02   1.7089879e-01  -3.6020856e+00  -2.2609849e+00
   2.4186786e+01  -2.1605733e+01   3.5000000e+02   1.8208380e-01  -3.7279352e+00  -2.0497613e+00
   2.4059608e+01  -2.1554947e+01   3.5000000e+02   1.8234457e-01  -3.8493055e+00  -1.8331181e+00
   2.3930710e+01  -2.1508167e+01   3.5000000e+02   1.7280715e-01  -3.9668811e+00  -1.6116936e+00
   2.3800234e+01  -2.1465444e+01   3.5000000e+02   1.5475744e-01  -4.0812624e+00  -1.3857012e+00
   2.3668325e+01  -2.1426825e+01   3.5000000e+02   1.2959457e-01  -4.1928745e+00  -1.1549570e+00
   2.3535131e+01  -2.1392352e+01   3.5000000e+02   9.8784084e-02  -4.3018895e+00  -9.1893107e-01
   2.3400797e+01  -2.1362065e+01   3.5000000e+02   6.3816286e-02  -4.4081722e+00  -6.7681520e-01
   2.3265473e+01  -2.1335996e+01   3.5000000e+02   2.6165231e-02  -4.5112335e+00  -4.2763313e-01
   2.3129308e+01  -2.1314174e+01   3.5000000e+02  -1.2738136e-02  -4.6102213e+00  -1.7034277e-01
   2.2992451e+01  -2.1296624e+01   3.5000000e+02  -5.1528081e-02  -4.7039308e+00   9.6047361e-02
   2.2855053e+01  -2.1283364e+01   3.5000000e+02  -8.8920026e-02  -4.7908380e+00   3.7236201e-01
   2.2717265e+01  -2.1274410e+01   3.5000000e+02  -1.2371328e-01  -4.8691603e+00   6.5916024e-01
   2.2579239e+01  -2.1269771e+01   3.5000000e+02  -1.5479676e-01  -4.9369322e+00   9.5664696e-01
   2.2441126e+01  -2.1269452e+01   3.5000000e+02  -1.8114436e-01  -4.9920985e+00   1.2646108e+00
   2.2303077e+01  -2.1273454e+01   3.5000000e+02  -2.0181045e-01  -5.0326164e+00   1.5823794e+00
   2.2165245e+01  -2.1281773e+01   3.5000000e+02  -2.1592589e-01  -5.0565614e+00   1.9087974e+00
   2.2027780e+01  -2.1294398e+01   3.5000000e+02  -2.2269758e-01  -5.0622345e+00   2.2422459e+00
   2.1890834e+01  -2.1311317e+01   3.5000000e+02  -2.2139871e-01  -5.0482620e+00   2.5806671e+00
   2.1754557e+01  -2.1332510e+01   3.5000000e+02  -2.1137755e-01  -5.0136800e+00   2.9216299e+00
   2.1619100e+01  -2.1357955e+01   3.5000000e+02  -1.9205206e-01  -4.9580032e+00   3.2624032e+00
   2.1484611e+01  -2.1387622e+01   3.5000000e+02  -1.6292238e-01  -4.8812645e+00   3.6000569e+00
   2.1351239e+01  -2.1421479e+01   3.5000000e+02  -1.2356876e-01  -4.7840312e+00   3.9315566e+00
   2.1219132e+01  -2.1459490e+01   3.5000000e+02  -7.3661899e-02  -4.6673879e+00   4.2538708e+00
   2.1088435e+01  -2.1501611e+01   3.5000000e+02  -1.2978636e-02  -4.5328877e+00   4.5640714e+00
   2.0959295e+01  -2.1547796e+01   3.5000000e+02   5.8596326e-02  -4.3824872e+00   4.8594073e+00
   2.0831855e+01  -2.1597994e+01   3.5000000e+02   1.4105369e-01  -4.2184491e+00   5.1373816e+00
   2.0706257e+01  -2.1652149e+01   3.5000000e+02   2.3424671e-01  -4.0432442e+00   5.3957883e+00
   2.0582642e+01  -2.1710202e+01   3.5000000e+02   3.3788201e-01  -3.8594490e+00   5.6327348e+00
   2.0461148e+01  -2.1772087e+01   3.5000000e+02   4.5150118e-01  -3.6696454e+00   5.8466487e+00
   2.0341913e+01  -2.1837736e+01   3.5000000e+02   5.7448158e-01  -3.4763426e+00   6.0362615e+00
   2.0225072e+01  -2.1907076e+01   3.5000000e+02   7.0602760e-01  -3.2819060e+00   6.2005944e+00
   2.0110758e+01  -2.1980030e+01   3.5000000e+02   8.4517521e-01  -3.0885118e+00   6.3389336e+00
   1.9999101e+01  -2.2056517e+01   3.5000000e+02   9.9080148e-01  -2.8981171e+00   6.4508082e+00
   1.9890229e+01  -2.2136450e+01   3.5000000e+02   1.1416372e+00  -2.7124488e+00   6.5359719e+00
   1.9784268e+01  -2.2219741e+01   3.5000000e+02   1.2962989e+00  -2.5330051e+00   6.5943864e+00
   1.9681341e+01  -2.2306297e+01   3.5000000e+02   1.4533081e+00  -2.3610629e+00   6.6262152e+00
   1.9581569e+01  -2.2396020e+01   3.5000000e+02   1.6111208e+00  -2.1976956e+00   6.6318180e+00
   1.9485068e+01  -2.2488810e+01   3.5000000e+02   1.7681623e+00  -2.0437873e+00   6.6117473e+00
   1.9391954e+01  -2.2584563e+01   3.5000000e+02   1.9228531e+00  -1.9000614e+00   6.5667423e+00
   1.9302337e+01  -2.2683170e+01   3.5000000e+02   2.0736319e+00  -1.7670903e+00   6.4977315e+00
   1.9216325e+01  -2.2784521e+01   3.5000000e+02   2.2189857e+00  -1.6453216e+00   6.4058172e+00
   1.9134023e+01  -2.2888502e+01   3.5000000e+02   2.3574636e+00  -1.5350929e+00   6.2922696e+00
   1.9055532e+01  -2.2994993e+01   3.5000000e+02   2.4876891e+00  -1.4366436e+00   6.1585163e+00
   1.8980949e+01  -2.3103875e+01   3.5000000e+02   2.6083833e+00  -1.3501276e+00   6.0061128e+00
   1.8910369e+01  -2.3215024e+01   3.5000000e+02   2.7183667e+00  -1.2756228e+00   5.8367273e+00
   1.8843880e+01  -2.3328314e+01   3.5000000e+02   2.8165689e+00  -1.2131268e+00   5.6521112e+00
   1.8781568e+01  -2.3443614e+01   3.5000000e+02   2.9020330e+00  -1.1625643e+00   5.4540724e+00
   1.8723516e+01  -2.3560794e+01   3.5000000e+02   2.9739247e+00  -1.1237853e+00   5.2444321e+00
   1.8669801e+01  -2.3679719e+01   3.5000000e+02   3.0315257e+00  -1.0965512e+00   5.0250060e+00
   1.8620496e+01  -2.3800252e+01   3.5000000e+02   3.0742360e+00  -1.0805341e+00   4.7975682e+00
   1.8575669e+01  -2.3922254e+01   3.5000000e+02   3.1015708e+00  -1.0753098e+00   4.5638265e+00
   1.8535385e+01  -2.4045585e+01   3.5000000e+02   3.1131583e+00  -1.0803587e+00   4.3254010e+00
   1.8499702e+01  -2.4170102e+01   3.5000000e+02   3.1087339e+00  -1.0950585e+00   4.0838204e+00
   1.8468677e+01  -2.4295659e+01   3.5000000e+02   3.0881457e+00  -1.1186993e+00   3.8405167e+00
   1.8442357e+01  -2.4422112e+01   3.5000000e+02   3.0513538e+00  -1.1504803e+00   3.5968266e+00
   1.8420789e+01  -2.4549313e+01   3.5000000e+02   2.9984457e+00  -1.1895375e+00   3.3540074e+00
   1.8404011e+01  -2.4677111e+01   3.5000000e+02   2.9296475e+00  -1.2349452e+00   3.1132539e+00
   1.8392057e+01  -2.4805359e+01   3.5000000e+02   2.8453405e+00  -1.2857482e+00   2.8756902e+00
   1.8384957e+01  -2.4933903e+01   3.5000000e+02   2.7460833e+00  -1.3409753e+00   2.6423964e+00
   1.8382734e+01  -2.5062593e+01   3.5000000e+02   2.6326168e+00  -1.3996602e+00   2.4143862e+00
   1.8385406e+01  -2.5191276e+01   3.5000000e+02   2.5058745e+00  -1.4608587e+00   2.1926072e+00
   1.8392985e+01  -2.5319800e+01   3.5000000e+02   2.3669716e+00  -1.5236651e+00   1.9779153e+00
   1.8405478e+01  -2.5448010e+01   3.5000000e+02   2.2171894e+00  -1.5872237e+00   1.7710557e+00
   1.8422886e+01  -2.5575753e+01   3.5000000e+02   2.0579351e+00  -1.6507369e+00   1.5726288e+00
   1.8445204e+01  -2.5702876e+01   3.5000000e+02   1.8906964e+00  -1.7134674e+00   1.3830706e+00
   1.8472420e+01  -2.5829227e+01   3.5000000e+02   1.7169829e+00  -1.7747347e+00   1.2026341e+00
   1.8504519e+01  -2.5954652e+01   3.5000000e+02   1.5382684e+00  -1.8339140e+00   1.0313799e+00
   1.8541475e+01  -2.6078999e+01   3.5000000e+02   1.3559224e+00  -1.8904149e+00   8.6918615e-01
   1.8583262e+01  -2.6202117e+01   3.5000000e+02   1.1711545e+00  -1.9436837e+00   7.1575280e-01
   1.8629842e+01  -2.6323855e+01   3.5000000e+02   9.8497076e-01  -1.9931723e+00   5.7065019e-01
   1.8681175e+01  -2.6444066e+01   3.5000000e+02   7.9813866e-01  -2.0383395e+00   4.3334496e-01
   1.8737212e+01  -2.6562600e+01   3.5000000e+02   6.1118865e-01  -2.0786333e+00   3.0326430e-01
   1.8797900e+01  -2.6679312e+01   3.5000000e+02   4.2441439e-01  -2.1134919e+00   1.7983759e-01
   1.8863178e+01  -2.6794057e+01   3.5000000e+02   2.3791467e-01  -2.1423423e+00   6.2555953e-02
   1.8932980e+01  -2.6906693e+01   3.5000000e+02   5.1640410e-02  -2.1646129e+00  -4.8989795e-02
   1.9007232e+01  -2.7017079e+01   3.5000000e+02  -1.3453582e-01  -2.1797459e+00  -1.5507305e-01
   1.9085856e+01  -2.7125079e+01   3.5000000e+02  -3.2075443e-01  -2.1872200e+00  -2.5582178e-01
   1.9168766e+01  -2.7230555e+01   3.5000000e+02  -5.0708525e-01  -2.1865718e+00  -3.5121501e-01
   1.9255870e+01  -2.7333376e+01   3.5000000e+02  -6.9347626e-01  -2.1774137e+00  -4.4110223e-01
   1.9347071e+01  -2.7433411e+01   3.5000000e+02  -8.7969459e-01  -2.1594548e+00  -5.2523857e-01
   1.9442266e+01  -2.7530535e+01   3.5000000e+02  -1.0653030e+00  -2.1325044e+00  -6.0332119e-01
   1.9541343e+01  -2.7624624e+01   3.5000000e+02  -1.2496419e+00  -2.0964736e+00  -6.7503104e-01
   1.9644189e+01  -2.7715557e+01   3.5000000e+02  -1.4318498e+00  -2.0513661e+00  -7.4008437e-01
   1.9750682e+01  -2.7803219e+01   3.5000000e+02  -1.6108937e+00  -1.9972524e+00  -7.9824759e-01
   1.9860694e+01  -2.7887498e+01   3.5000000e+02  -1.7856128e+00  -1.9342456e+00  -8.4935970e-01
   1.9974094e+01  -2.7968285e+01   3.5000000e+02  -1.9547765e+00  -1.8624717e+00  -8.9333499e-01
   2.0090744e+01  -2.8045476e+01   3.5000000e+02  -2.1171401e+00  -1.7820384e+00  -9.3013562e-01
   2.0210501e+01  -2.8118972e+01   3.5000000e+02  -2.2714990e+00  -1.6930132e+00  -9.5974003e-01
   2.0333216e+01  -2.8188677e+01   3.5000000e+02  -2.4167307e+00  -1.5954133e+00  -9.8210095e-01
   2.0458737e+01  -2.8254501e+01   3.5000000e+02  -2.5518328e+00  -1.4892029e+00  -9.9709679e-01
   2.0586908e+01  -2.8316358e+01   3.5000000e+02  -2.6759412e+00  -1.3743097e+00  -1.0044886e+00
   2.0717566e+01  -2.8374168e+01   3.5000000e+02  -2.7883416e+00  -1.2506537e+00  -1.0038779e+00
   2.0850545e+01  -2.8427855e+01   3.5000000e+02  -2.8884727e+00  -1.1181866e+00  -9.9469257e-01
   2.0985676e+01  -2.8477349e+01   3.5000000e+02  -2.9759264e+00  -9.7693776e-01  -9.7617657e-01
   2.1122786e+01  -2.8522585e+01   3.5000000e+02  -3.0504440e+00  -8.2706994e-01  -9.4740239e-01
   2.1261698e+01  -2.8563504e+01   3.5000000e+02  -3.1119148e+00  -6.6893397e-01  -9.0729892e-01
   2.1402232e+01  -2.8600051e+01   3.5000000e+02  -3.1603777e+00  -5.0312254e-01  -8.5470316e-01
   2.1544205e+01  -2.8632180e+01   3.5000000e+02  -3.1960272e+00  -3.3051668e-01  -7.8841237e-01
   2.1687434e+01  -2.8659846e+01   3.5000000e+02  -3.2192192e+00  -1.5232190e-01  -7.0727940e-01
   2.1831730e+01  -2.8683015e+01   3.5000000e+02  -3.2304801e+00   2.9904320e-02  -6.1028145e-01
   2.1976905e+01  -2.8701654e+01   3.5000000e+02  -3.2305126e+00   2.1425810e-01  -4.9664107e-01
   2.2122768e+01  -2.8715741e+01   3.5000000e+02  -3.2201989e+00   3.9850965e-01  -3.6590690e-01
   2.2871159e+01  -2.8845191e+01   3.5000000e+02  -2.9947960e+00   1.1879810e+00   7.8771648e-01
   2.3016710e+01  -2.8831814e+01   3.5000000e+02  -2.9403531e+00   1.3103061e+00   9.9504715e-01
   2.3161629e+01  -2.8814061e+01   3.5000000e+02  -2.8853534e+00   1.4161538e+00   1.2084110e+00
   2.3305737e+01  -2.8791954e+01   3.5000000e+02  -2.8312393e+00   1.5043223e+00   1.4246004e+00
   2.3448861e+01  -2.8765519e+01   3.5000000e+02  -2.7793263e+00   1.5741693e+00   1.6402763e+00
   2.3590824e+01  -2.8734790e+01   3.5000000e+02  -2.7307674e+00   1.6256168e+00   1.8521043e+00
   2.3731456e+01  -2.8699805e+01   3.5000000e+02  -2.6865236e+00   1.6591312e+00   2.0569067e+00
   2.3870586e+01  -2.8660605e+01   3.5000000e+02  -2.6473556e+00   1.6756623e+00   2.2517678e+00
   2.4008046e+01  -2.8617239e+01   3.5000000e+02  -2.6138168e+00   1.6765589e+00   2.4341410e+00
   2.4143671e+01  -2.8569760e+01   3.5000000e+02  -2.5862669e+00   1.6634730e+00   2.6019036e+00
   2.4277300e+01  -2.8518226e+01   3.5000000e+02  -2.5648889e+00   1.6382569e+00   2.7533862e+00
   2.4408774e+01  -2.8462700e+01   3.5000000e+02  -2.5497146e+00   1.6028671e+00   2.8873673e+00
   2.4537936e+01  -2.8403249e+01   3.5000000e+02  -2.5406527e+00   1.5592796e+00   3.0030442e+00
   2.4664636e+01  -2.8339946e+01   3.5000000e+02  -2.5375112e+00   1.5094174e+00   3.0999989e+00
   2.4788725e+01  -2.8272867e+01   3.5000000e+02  -2.5400297e+00   1.4551032e+00   3.1781301e+00
   2.4910059e+01  -2.8202094e+01   3.5000000e+02  -2.5478970e+00   1.3980210e+00   3.2376064e+00
   2.5028498e+01  -2.8127711e+01   3.5000000e+02  -2.5607767e+00   1.3396974e+00   3.2788034e+00
   2.5143907e+01  -2.8049808e+01   3.5000000e+02  -2.5783193e+00   1.2814880e+00   3.3022609e+00
   2.5256155e+01  -2.7968479e+01   3.5000000e+02  -2.6001796e+00   1.2245751e+00   3.3086358e+00
   2.5365115e+01  -2.7883822e+01   3.5000000e+02  -2.6260268e+00   1.1699663e+00   3.2986654e+00
   2.5470667e+01  -2.7795936e+01   3.5000000e+02  -2.6555542e+00   1.1184926e+00   3.2731338e+00
   2.5572694e+01  -2.7704927e+01   3.5000000e+02  -2.6884777e+00   1.0708076e+00   3.2328474e+00
   2.5671085e+01  -2.7610903e+01   3.5000000e+02  -2.7245366e+00   1.0273861e+00   3.1786031e+00
   2.5765733e+01  -2.7513975e+01   3.5000000e+02  -2.7634848e+00   9.8852472e-01   3.1111612e+00
   2.5856538e+01  -2.7414257e+01   3.5000000e+02  -2.8050727e+00   9.5434220e-01   3.0312229e+00
   2.5943405e+01  -2.7311868e+01   3.5000000e+02  -2.8490245e+00   9.2478750e-01   2.9394113e+00
   2.6026242e+01  -2.7206926e+01   3.5000000e+02  -2.8950157e+00   8.9965910e-01   2.8362470e+00
   2.6104966e+01  -2.7099554e+01   3.5000000e+02  -2.9426369e+00   8.7861701e-01   2.7221586e+00
   2.6179498e+01  -2.6989879e+01   3.5000000e+02  -2.9913700e+00   8.6121517e-01   2.5974873e+00
   2.6249764e+01  -2.6878026e+01   3.5000000e+02  -3.0405725e+00   8.4693403e-01   2.4624992e+00
   2.6315695e+01  -2.6764125e+01   3.5000000e+02  -3.0894655e+00   8.3520935e-01   2.3174310e+00
   2.6377231e+01  -2.6648309e+01   3.5000000e+02  -3.1371412e+00   8.2546036e-01   2.1625314e+00
   2.6434314e+01  -2.6530709e+01   3.5000000e+02  -3.1825925e+00   8.1712307e-01   1.9980894e+00
   2.6486893e+01  -2.6411461e+01   3.5000000e+02  -3.2247466e+00   8.0966250e-01   1.8244901e+00
   2.6534923e+01  -2.6290702e+01   3.5000000e+02  -3.2625187e+00   8.0258619e-01   1.6422359e+00
   2.6578363e+01  -2.6168567e+01   3.5000000e+02  -3.2948704e+00   7.9544917e-01   1.4519542e+00
   2.6617180e+01  -2.6045196e+01   3.5000000e+02  -3.3208637e+00   7.8784534e-01   1.2544123e+00
   2.6651344e+01  -2.5920729e+01   3.5000000e+02  -3.3397140e+00   7.7940196e-01   1.0504862e+00
   2.6680833e+01  -2.5795305e+01   3.5000000e+02  -3.3508282e+00   7.6976176e-01   8.4113159e-01
   2.6705628e+01  -2.5669065e+01   3.5000000e+02  -3.3538258e+00   7.5856890e-01   6.2734383e-01
   2.6725717e+01  -2.5542152e+01   3.5000000e+02  -3.3485429e+00   7.4544937e-01   4.1011594e-01
   2.6741092e+01  -2.5414705e+01   3.5000000e+02  -3.3350159e+00   7.2999636e-01   1.9038011e-01
   2.6751752e+01  -2.5286867e+01   3.5000000e+02  -3.3134483e+00   7.1175520e-01  -3.1011877e-02
   2.6757700e+01  -2.5158780e+01   3.5000000e+02  -3.2841634e+00   6.9021539e-01  -2.5332658e-01
   2.6758944e+01  -2.5030584e+01   3.5000000e+02  -3.2475467e+00   6.6480500e-01  -4.7595927e-01
   2.6755498e+01  -2.4902422e+01   3.5000000e+02  -3.2039871e+00   6.3489258e-01  -6.9841546e-01
   2.6747379e+01  -2.4774434e+01   3.5000000e+02  -3.1538181e+00   5.9979478e-01  -9.2029718e-01
   2.6734612e+01  -2.4646759e+01   3.5000000e+02  -3.0972724e+00   5.5878936e-01  -1.1412496e+00
   2.6717224e+01  -2.4519538e+01   3.5000000e+02  -3.0344514e+00   5.1113894e-01  -1.3609049e+00
   2.6695248e+01  -2.4392908e+01   3.5000000e+02  -2.9653141e+00   4.5611448e-01  -1.5788239e+00
   2.6668722e+01  -2.4267007e+01   3.5000000e+02  -2.8896922e+00   3.9302875e-01  -1.7944264e+00
   2.6637687e+01  -2.4141970e+01   3.5000000e+02  -2.8073221e+00   3.2126838e-01  -2.0069457e+00
   2.6602190e+01  -2.4017934e+01   3.5000000e+02  -2.7179019e+00   2.4033005e-01  -2.2153831e+00
   2.6562281e+01  -2.3895031e+01   3.5000000e+02  -2.6211499e+00   1.4984699e-01  -2.4185076e+00
   2.6518015e+01  -2.3773393e+01   3.5000000e+02  -2.5168750e+00   4.9616254e-02  -2.6148592e+00
   2.6469452e+01  -2.3653150e+01   3.5000000e+02  -2.4050355e+00  -6.0386288e-02  -2.8027882e+00
   2.6416655e+01  -2.3534430e+01   3.5000000e+02  -2.2857840e+00  -1.8000028e-01  -2.9805118e+00
   2.6359690e+01  -2.3417361e+01   3.5000000e+02  -2.1594955e+00  -3.0888308e-01  -3.1461786e+00
   2.6298630e+01  -2.3302065e+01   3.5000000e+02  -2.0267740e+00  -4.4652592e-01  -3.2979417e+00
   2.6233547e+01  -2.3188666e+01   3.5000000e+02  -1.8884394e+00  -5.9226805e-01  -3.4340219e+00
   2.6164521e+01  -2.3077283e+01   3.5000000e+02  -1.7455058e+00  -7.4532092e-01  -3.5527647e+00
   2.6091634e+01  -2.2968034e+01   3.5000000e+02  -1.5991448e+00  -9.0478849e-01  -3.6526849e+00
   2.6014971e+01  -2.2861034e+01   3.5000000e+02  -1.4506496e+00  -1.0696888e+00  -3.7325009e+00
   2.5934621e+01  -2.2756394e+01   3.5000000e+02  -1.3014005e+00  -1.2389713e+00  -3.7911591e+00
   2.5850676e+01  -2.2654226e+01   3.5000000e+02  -1.1528374e+00  -1.4115266e+00  -3.8278513e+00
   2.5763230e+01  -2.2554635e+01   3.5000000e+02  -1.0064275e+00  -1.5862088e+00  -3.8420356e+00
   2.5672383e+01  -2.2457726e+01   3.5000000e+02  -8.6365081e-01  -1.7618390e+00  -3.8334509e+00
   2.5578234e+01  -2.2363601e+01   3.5000000e+02  -7.2596979e-01  -1.9372317e+00  -3.8021337e+00
   2.5480888e+01  -2.2272356e+01   3.5000000e+02  -5.9481151e-01  -2.1112133e+00  -3.7484334e+00
   2.5380451e+01  -2.2184087e+01   3.5000000e+02  -4.7154045e-01  -2.2826492e+00  -3.6730188e+00
   2.5277033e+01  -2.2098885e+01   3.5000000e+02  -3.5742932e-01  -2.4504794e+00  -3.5768788e+00
   2.5170746e+01  -2.2016839e+01   3.5000000e+02  -2.5362621e-01  -2.6137558e+00  -3.4613075e+00
   2.5061703e+01  -2.1938034e+01   3.5000000e+02  -1.6111889e-01  -2.7716856e+00  -3.3278716e+00
   2.4950021e+01  -2.1862551e+01   3.5000000e+02  -8.0703048e-02  -2.9236661e+00  -3.1783644e+00
   2.4835818e+01  -2.1790468e+01   3.5000000e+02  -1.2949308e-02  -3.0693194e+00  -3.0147368e+00
   2.4719216e+01  -2.1721859e+01   3.5000000e+02   4.1820821e-02  -3.2085113e+00  -2.8390169e+00
   2.4600336e+01  -2.1656796e+01   3.5000000e+02   8.3554394e-02  -3.3413610e+00  -2.6532105e+00
   2.4479304e+01  -2.1595345e+01   3.5000000e+02   1.1247060e-01  -3.4682244e+00  -2.4592055e+00
   2.4356246e+01  -2.1537569e+01   3.5000000e+02   1.2905690e-01  -3.5896641e+00  -2.2586691e+00
   2.4231289e+01  -2.1483527e+01   3.5000000e+02   1.3405010e-01  -3.7063951e+00  -2.0529602e+00
   2.4104564e+01  -2.1433276e+01   3.5000000e+02   1.2840718e-01  -3.8192115e+00  -1.8430660e+00
   2.3976201e+01  -2.1386867e+01   3.5000000e+02   1.1326630e-01  -3.9289083e+00  -1.6295497e+00
   2.3846332e+01  -2.1344346e+01   3.5000000e+02   8.9901557e-02  -4.0361903e+00  -1.4125427e+00
   2.3715091e+01  -2.1305759e+01   3.5000000e+02   5.9678967e-02  -4.1415857e+00  -1.1917662e+00
   2.3582613e+01  -2.1271144e+01   3.5000000e+02   2.4007203e-02  -4.2453700e+00  -9.6657633e-01
   2.3449032e+01  -2.1240537e+01   3.5000000e+02  -1.5700678e-02  -4.3475069e+00  -7.3603903e-01
   2.3314487e+01  -2.1213968e+01   3.5000000e+02  -5.8062758e-02  -4.4476025e+00  -4.9903560e-01
   2.3179113e+01  -2.1191466e+01   3.5000000e+02  -1.0175198e-01  -4.5448961e+00  -2.5435712e-01
   2.3043048e+01  -2.1173053e+01   3.5000000e+02  -1.4551647e-01  -4.6382610e+00  -8.2944292e-04
   2.2906432e+01  -2.1158749e+01   3.5000000e+02  -1.8818507e-01  -4.7262370e+00   2.6257597e-01
   2.2769404e+01  -2.1148566e+01   3.5000000e+02  -2.2867529e-01  -4.8070836e+00   5.3664466e-01
   2.2632101e+01  -2.1142517e+01   3.5000000e+02  -2.6598328e-01  -4.8788532e+00   8.2183414e-01
   2.2494664e+01  -2.1140607e+01   3.5000000e+02  -2.9918401e-01  -4.9394713e+00   1.1181910e+00
   2.2357233e+01  -2.1142839e+01   3.5000000e+02  -3.2741957e-01  -4.9868368e+00   1.4253133e+00
   2.2219947e+01  -2.1149209e+01   3.5000000e+02  -3.4989640e-01  -5.0189234e+00   1.7423260e+00
   2.2082945e+01  -2.1159712e+01   3.5000000e+02  -3.6587299e-01  -5.0338828e+00   2.0678803e+00
   2.1946367e+01  -2.1174336e+01   3.5000000e+02  -3.7466162e-01  -5.0301428e+00   2.4001751e+00
   2.1810352e+01  -2.1193067e+01   3.5000000e+02  -3.7562195e-01  -5.0064976e+00   2.7370114e+00
   2.1675037e+01  -2.1215886e+01   3.5000000e+02  -3.6816512e-01  -4.9621794e+00   3.0758637e+00
   2.1540561e+01  -2.1242768e+01   3.5000000e+02  -3.5175762e-01  -4.8969117e+00   3.4139560e+00
   2.1407062e+01  -2.1273688e+01   3.5000000e+02  -3.2591937e-01  -4.8109373e+00   3.7483692e+00
   2.1274674e+01  -2.1308613e+01   3.5000000e+02  -2.9024038e-01  -4.7050123e+00   4.0761471e+00
   2.1143535e+01  -2.1347507e+01   3.5000000e+02  -2.4438183e-01  -4.5803827e+00   4.3943794e+00
   2.1013778e+01  -2.1390331e+01   3.5000000e+02  -1.8808630e-01  -4.4387204e+00   4.7003117e+00
   2.0885538e+01  -2.1437040e+01   3.5000000e+02  -1.2119281e-01  -4.2820495e+00   4.9914013e+00
   2.0758945e+01  -2.1487588e+01   3.5000000e+02  -4.3642630e-02  -4.1126453e+00   5.2653869e+00
   2.0634131e+01  -2.1541921e+01   3.5000000e+02   4.4495774e-02  -3.9329407e+00   5.5203007e+00
   2.0511225e+01  -2.1599984e+01   3.5000000e+02   1.4302276e-01  -3.7454225e+00   5.7544904e+00
   2.0390356e+01  -2.1661718e+01   3.5000000e+02   2.5158905e-01  -3.5525460e+00   5.9666039e+00
   2.0271649e+01  -2.1727059e+01   3.5000000e+02   3.6968250e-01  -3.3566557e+00   6.1555752e+00
   2.0155228e+01  -2.1795940e+01   3.5000000e+02   4.9662482e-01  -3.1599353e+00   6.3205919e+00
   2.0041217e+01  -2.1868290e+01   3.5000000e+02   6.3156915e-01  -2.9643746e+00   6.4610660e+00
   1.9929736e+01  -2.1944034e+01   3.5000000e+02   7.7350656e-01  -2.7717445e+00   6.5766142e+00
   1.9820903e+01  -2.2023094e+01   3.5000000e+02   9.2128179e-01  -2.5835982e+00   6.6670346e+00
   1.9714834e+01  -2.2105388e+01   3.5000000e+02   1.0736118e+00  -2.4012787e+00   6.7322934e+00
   1.9611643e+01  -2.2190831e+01   3.5000000e+02   1.2291131e+00  -2.2259336e+00   6.7725168e+00
   1.9511443e+01  -2.2279334e+01   3.5000000e+02   1.3863286e+00  -2.0585364e+00   6.7879875e+00
   1.9414341e+01  -2.2370806e+01   3.5000000e+02   1.5437603e+00  -1.8998971e+00   6.7791461e+00
   1.9320445e+01  -2.2465151e+01   3.5000000e+02   1.6998926e+00  -1.7506949e+00   6.7465881e+00
   1.9229858e+01  -2.2562272e+01   3.5000000e+02   1.8532247e+00  -1.6114865e+00   6.6910639e+00
   1.9142681e+01  -2.2662066e+01   3.5000000e+02   2.0022847e+00  -1.4827270e+00   6.6134795e+00
   1.9059011e+01  -2.2764431e+01   3.5000000e+02   2.1456597e+00  -1.3647829e+00   6.5148845e+00
   1.8978944e+01  -2.2869257e+01   3.5000000e+02   2.2819973e+00  -1.2579464e+00   6.3964739e+00
   1.8902571e+01  -2.2976436e+01   3.5000000e+02   2.4100331e+00  -1.1624403e+00   6.2595655e+00
   1.8829981e+01  -2.3085855e+01   3.5000000e+02   2.5285907e+00  -1.0784271e+00   6.1055932e+00
   1.8761258e+01  -2.3197399e+01   3.5000000e+02   2.6365933e+00  -1.0060067e+00   5.9360850e+00
   1.8696485e+01  -2.3310949e+01   3.5000000e+02   2.7330701e+00  -9.4522102e-01   5.7526436e+00
   1.8635740e+01  -2.3426387e+01   3.5000000e+02   2.8171650e+00  -8.9604478e-01   5.5569135e+00
   1.8579096e+01  -2.3543589e+01   3.5000000e+02   2.8881314e+00  -8.5837505e-01   5.3505669e+00
   1.8526625e+01  -2.3662432e+01   3.5000000e+02   2.9453415e+00  -8.3203332e-01   5.1352615e+00
   1.8478394e+01  -2.3782787e+01   3.5000000e+02   2.9882760e+00  -8.1674630e-01   4.9126301e+00
   1.8434464e+01  -2.3904529e+01   3.5000000e+02   3.0165257e+00  -8.1214324e-01   4.6842384e+00
   1.8394896e+01  -2.4027524e+01   3.5000000e+02   3.0297822e+00  -8.1775531e-01   4.4515932e+00
   1.8359743e+01  -2.4151643e+01   3.5000000e+02   3.0278347e+00  -8.3301039e-01   4.2161079e+00
   1.8329057e+01  -2.4276751e+01   3.5000000e+02   3.0105676e+00  -8.5724405e-01   3.9791210e+00
   1.8302882e+01  -2.4402714e+01   3.5000000e+02   2.9779613e+00  -8.8970121e-01   3.7418910e+00
   1.8281261e+01  -2.4529395e+01   3.5000000e+02   2.9301027e+00  -9.2956016e-01   3.5056101e+00
   1.8264231e+01  -2.4656656e+01   3.5000000e+02   2.8671960e+00  -9.7594187e-01   3.2714149e+00
   1.8251824e+01  -2.4784360e+01   3.5000000e+02   2.7895785e+00  -1.0279320e+00   3.0403902e+00
   1.8244067e+01  -2.4912367e+01   3.5000000e+02   2.6977397e+00  -1.0845979e+00   2.8135808e+00
   1.8240985e+01  -2.5040537e+01   3.5000000e+02   2.5923365e+00  -1.1450153e+00   2.5919790e+00
   1.8242593e+01  -2.5168729e+01   3.5000000e+02   2.4741976e+00  -1.2082710e+00   2.3765203e+00
   1.8248907e+01  -2.5296802e+01   3.5000000e+02   2.3443259e+00  -1.2734978e+00   2.1680526e+00
   1.8259933e+01  -2.5424615e+01   3.5000000e+02   2.2038794e+00  -1.3398676e+00   1.9673212e+00
   1.8275674e+01  -2.5552025e+01   3.5000000e+02   2.0541485e+00  -1.4066112e+00   1.7749379e+00
   1.8296128e+01  -2.5678892e+01   3.5000000e+02   1.8965092e+00  -1.4730205e+00   1.5913513e+00
   1.8321288e+01  -2.5805073e+01   3.5000000e+02   1.7323802e+00  -1.5384459e+00   1.4168353e+00
   1.8351141e+01  -2.5930428e+01   3.5000000e+02   1.5631583e+00  -1.6022915e+00   1.2514723e+00
   1.8385667e+01  -2.6054815e+01   3.5000000e+02   1.3901659e+00  -1.6640037e+00   1.0951617e+00
   1.8424844e+01  -2.6178095e+01   3.5000000e+02   1.2145893e+00  -1.7230670e+00   9.4762288e-01
   1.8468642e+01  -2.6300127e+01   3.5000000e+02   1.0374376e+00  -1.7789814e+00   8.0843352e-01
   1.8517026e+01  -2.6420775e+01   3.5000000e+02   8.5949880e-01  -1.8312529e+00   6.7705919e-01
   1.8569957e+01  -2.6539900e+01   3.5000000e+02   6.8133345e-01  -1.8793846e+00   5.5290409e-01
   1.8627387e+01  -2.6657366e+01   3.5000000e+02   5.0326896e-01  -1.9228626e+00   4.3536509e-01
   1.8689266e+01  -2.6773038e+01   3.5000000e+02   3.2542306e-01  -1.9611638e+00   3.2387471e-01
   1.8755537e+01  -2.6886784e+01   3.5000000e+02   1.4774239e-01  -1.9937543e+00   2.1795344e-01
   1.8826136e+01  -2.6998473e+01   3.5000000e+02  -2.9938587e-02  -2.0201017e+00   1.1724657e-01
   1.8900996e+01  -2.7107974e+01   3.5000000e+02  -2.0783189e-01  -2.0396968e+00   2.1540103e-02
   1.8980042e+01  -2.7215161e+01   3.5000000e+02  -3.8613084e-01  -2.0520667e+00  -6.9225221e-02
   1.9063196e+01  -2.7319909e+01   3.5000000e+02  -5.6493963e-01  -2.0568022e+00  -1.5497138e-01
   1.9150371e+01  -2.7422096e+01   3.5000000e+02  -7.4421502e-01  -2.0535713e+00  -2.3549920e-01
   1.9241478e+01  -2.7521601e+01   3.5000000e+02  -9.2372434e-01  -2.0421395e+00  -3.1053671e-01
   1.9336421e+01  -2.7618308e+01   3.5000000e+02  -1.1030236e+00  -2.0223705e+00  -3.7977392e-01
   1.9435097e+01  -2.7712102e+01   3.5000000e+02  -1.2814486e+00  -1.9942260e+00  -4.4291043e-01
   1.9537402e+01  -2.7802872e+01   3.5000000e+02  -1.4581391e+00  -1.9577540e+00  -4.9970250e-01
   1.9643223e+01  -2.7890511e+01   3.5000000e+02  -1.6320677e+00  -1.9130630e+00  -5.4998073e-01
   1.9752443e+01  -2.7974914e+01   3.5000000e+02  -1.8020877e+00  -1.8602985e+00  -5.9367386e-01
   1.9864941e+01  -2.8055980e+01   3.5000000e+02  -1.9669901e+00  -1.7996092e+00  -6.3080384e-01
   1.9980590e+01  -2.8133613e+01   3.5000000e+02  -2.1255574e+00  -1.7311165e+00  -6.6146116e-01
   2.0099259e+01  -2.8207718e+01   3.5000000e+02  -2.2766124e+00  -1.6548934e+00  -6.8577804e-01
   2.0220812e+01  -2.8278208e+01   3.5000000e+02  -2.4190655e+00  -1.5709441e+00  -7.0387108e-01
   2.0345108e+01  -2.8344997e+01   3.5000000e+02  -2.5519376e+00  -1.4792067e+00  -7.1580200e-01
   2.0472005e+01  -2.8408004e+01   3.5000000e+02  -2.6743853e+00  -1.3795582e+00  -7.2152704e-01
   2.0601352e+01  -2.8467152e+01   3.5000000e+02  -2.7857015e+00  -1.2718414e+00  -7.2084921e-01
   2.0732999e+01  -2.8522371e+01   3.5000000e+02  -2.8853226e+00  -1.1558919e+00  -7.1339223e-01
   2.0866788e+01  -2.8573592e+01   3.5000000e+02  -2.9728142e+00  -1.0315898e+00  -6.9858931e-01
   2.1002562e+01  -2.8620753e+01   3.5000000e+02  -3.0478722e+00  -8.9889784e-01  -6.7567876e-01
   2.1140158e+01  -2.8663798e+01   3.5000000e+02  -3.1103132e+00  -7.5791994e-01  -6.4371680e-01
   2.1279410e+01  -2.8702672e+01   3.5000000e+02  -3.1600730e+00  -6.0895281e-01  -6.0162333e-01
   2.1420151e+01  -2.8737329e+01   3.5000000e+02  -3.1972132e+00  -4.5253101e-01  -5.4821165e-01
   2.1562211e+01  -2.8767726e+01   3.5000000e+02  -3.2219264e+00  -2.8947531e-01  -4.8226192e-01
   2.1705417e+01  -2.8793825e+01   3.5000000e+02  -3.2345485e+00  -1.2092690e-01  -4.0259196e-01
   2.1849595e+01  -2.8815595e+01   3.5000000e+02  -3.2355720e+00   5.1634429e-02  -3.0813906e-01
   2.1994569e+01  -2.8833009e+01   3.5000000e+02  -3.2256572e+00   2.2638808e-01  -1.9806155e-01
   2.2140162e+01  -2.8846046e+01   3.5000000e+02  -3.2056398e+00   4.0119769e-01  -7.1831772e-02
   2.2286196e+01  -2.8854688e+01   3.5000000e+02  -3.1765319e+00   5.7366327e-01   7.0664389e-02
   2.2432492e+01  -2.8858927e+01   3.5000000e+02  -3.1395122e+00   7.4119979e-01   2.2906309e-01
   2.2578871e+01  -2.8858755e+01   3.5000000e+02  -3.0959082e+00   9.0114613e-01   4.0244661e-01
   2.2725153e+01  -2.8854175e+01   3.5000000e+02  -3.0471630e+00   1.0508850e+00   5.8934166e-01
   2.3482750e+01  -2.8890663e+01   3.5000000e+02  -2.6697588e+00   1.5104033e+00   1.8923471e+00
   2.3625094e+01  -2.8859884e+01   3.5000000e+02  -2.6138855e+00   1.5556613e+00   2.0982115e+00
   2.3766142e+01  -2.8824969e+01   3.5000000e+02  -2.5628112e+00   1.5833889e+00   2.2974768e+00
   2.3905735e+01  -2.8785956e+01   3.5000000e+02  -2.5173407e+00   1.5945127e+00   2.4873211e+00
   2.4043712e+01  -2.8742890e+01   3.5000000e+02  -2.4780671e+00   1.5903509e+00   2.6652641e+00
   2.4179920e+01  -2.8695823e+01   3.5000000e+02  -2.4453730e+00   1.5725177e+00   2.8292435e+00
   2.4314203e+01  -2.8644807e+01   3.5000000e+02  -2.4194621e+00   1.5428319e+00   2.9776170e+00
   2.4446412e+01  -2.8589902e+01   3.5000000e+02  -2.4003691e+00   1.5032144e+00   3.1091886e+00
   2.4576399e+01  -2.8531171e+01   3.5000000e+02  -2.3879954e+00   1.4556107e+00   3.2231673e+00
   2.4704021e+01  -2.8468680e+01   3.5000000e+02  -2.3821358e+00   1.4019212e+00   3.3191323e+00
   2.4829135e+01  -2.8402501e+01   3.5000000e+02  -2.3825045e+00   1.3439524e+00   3.3969776e+00
   2.4951607e+01  -2.8332709e+01   3.5000000e+02  -2.3887590e+00   1.2833781e+00   3.4568648e+00
   2.5071302e+01  -2.8259385e+01   3.5000000e+02  -2.4005245e+00   1.2217256e+00   3.4991618e+00
   2.5188091e+01  -2.8182611e+01   3.5000000e+02  -2.4174150e+00   1.1603629e+00   3.5243969e+00
   2.5301850e+01  -2.8102474e+01   3.5000000e+02  -2.4390463e+00   1.1004939e+00   3.5332215e+00
   2.5412458e+01  -2.8019064e+01   3.5000000e+02  -2.4650538e+00   1.0431600e+00   3.5263702e+00
   2.5519799e+01  -2.7932477e+01   3.5000000e+02  -2.4950985e+00   9.8923620e-01   3.5046370e+00
   2.5623761e+01  -2.7842807e+01   3.5000000e+02  -2.5288835e+00   9.3943389e-01   3.4688359e+00
   2.5724237e+01  -2.7750157e+01   3.5000000e+02  -2.5661440e+00   8.9428998e-01   3.4197886e+00
   2.5821125e+01  -2.7654630e+01   3.5000000e+02  -2.6066519e+00   8.5416819e-01   3.3582848e+00
   2.5914327e+01  -2.7556331e+01   3.5000000e+02  -2.6502027e+00   8.1925675e-01   3.2850556e+00
   2.6003751e+01  -2.7455370e+01   3.5000000e+02  -2.6965916e+00   7.8956687e-01   3.2007523e+00
   2.6089309e+01  -2.7351859e+01   3.5000000e+02  -2.7455900e+00   7.6494498e-01   3.1059191e+00
   2.6170918e+01  -2.7245912e+01   3.5000000e+02  -2.7969127e+00   7.4508781e-01   3.0009799e+00
   2.6248502e+01  -2.7137645e+01   3.5000000e+02  -2.8501833e+00   7.2956405e-01   2.8862389e+00
   2.6321987e+01  -2.7027176e+01   3.5000000e+02  -2.9049061e+00   7.1784869e-01   2.7618898e+00
   2.6391306e+01  -2.6914627e+01   3.5000000e+02  -2.9604407e+00   7.0935083e-01   2.6280504e+00
   2.6456397e+01  -2.6800120e+01   3.5000000e+02  -3.0159978e+00   7.0345143e-01   2.4847952e+00
   2.6517203e+01  -2.6683778e+01   3.5000000e+02  -3.0706467e+00   6.9953380e-01   2.3322049e+00
   2.6573672e+01  -2.6565729e+01   3.5000000e+02  -3.1233385e+00   6.9700770e-01   2.1704230e+00
   2.6625757e+01  -2.6446098e+01   3.5000000e+02  -3.1729541e+00   6.9533044e-01   1.9996870e+00
   2.6673417e+01  -2.6325015e+01   3.5000000e+02  -3.2183530e+00   6.9401283e-01   1.8203763e+00
   2.6716615e+01  -2.6202608e+01   3.5000000e+02  -3.2584398e+00   6.9262422e-01   1.6330173e+00
   2.6755319e+01  -2.6079009e+01   3.5000000e+02  -3.2922217e+00   6.9078379e-01   1.4382943e+00
   2.6789504e+01  -2.5954348e+01   3.5000000e+02  -3.3188657e+00   6.8814848e-01   1.2370232e+00
   2.6819147e+01  -2.5828758e+01   3.5000000e+02  -3.3377399e+00   6.8439901e-01   1.0301235e+00
   2.6844232e+01  -2.5702371e+01   3.5000000e+02  -3.3484388e+00   6.7921869e-01   8.1857110e-01
   2.6864748e+01  -2.5575320e+01   3.5000000e+02  -3.3507898e+00   6.7227569e-01   6.0335074e-01
   2.6880688e+01  -2.5447738e+01   3.5000000e+02  -3.3448392e+00   6.6320614e-01   3.8540327e-01
   2.6892049e+01  -2.5319759e+01   3.5000000e+02  -3.3308193e+00   6.5159947e-01   1.6558341e-01
   2.6898836e+01  -2.5191515e+01   3.5000000e+02  -3.3091008e+00   6.3698582e-01  -5.5374688e-02
   2.6901055e+01  -2.5063141e+01   3.5000000e+02  -3.2801334e+00   6.1883418e-01  -2.7687276e-01
   2.6898718e+01  -2.4934768e+01   3.5000000e+02  -3.2443810e+00   5.9654935e-01  -4.9845516e-01
   2.6891843e+01  -2.4806529e+01   3.5000000e+02  -3.2022592e+00   5.6947909e-01  -7.1977769e-01
   2.6880449e+01  -2.4678557e+01   3.5000000e+02  -3.1540795e+00   5.3692806e-01  -9.4057696e-01
   2.6864563e+01  -2.4550981e+01   3.5000000e+02  -3.1000085e+00   4.9817300e-01  -1.1606149e+00
   2.6844215e+01  -2.4423934e+01   3.5000000e+02  -3.0400491e+00   4.5249099e-01  -1.3796055e+00
   2.6819438e+01  -2.4297543e+01   3.5000000e+02  -2.9740395e+00   3.9918473e-01  -1.5971628e+00
   2.6790271e+01  -2.4171938e+01   3.5000000e+02  -2.9016843e+00   3.3761742e-01  -1.8127213e+00
   2.6756755e+01  -2.4047245e+01   3.5000000e+02  -2.8225974e+00   2.6724306e-01  -2.0255019e+00
   2.6718937e+01  -2.3923592e+01   3.5000000e+02  -2.7363706e+00   1.8764026e-01  -2.2344713e+00
   2.6676867e+01  -2.3801102e+01   3.5000000e+02  -2.6426397e+00   9.8534477e-02  -2.4383524e+00
   2.6630600e+01  -2.3679898e+01   3.5000000e+02  -2.5411574e+00  -1.8028813e-04  -2.6356385e+00
   2.6580191e+01  -2.3560103e+01   3.5000000e+02  -2.4318491e+00  -1.0843259e-01  -2.8246430e+00
   2.6525703e+01  -2.3441835e+01   3.5000000e+02  -2.3148580e+00  -2.2597663e-01  -3.0035611e+00
   2.6467201e+01  -2.3325214e+01   3.5000000e+02  -2.1905659e+00  -3.5239733e-01  -3.1705356e+00
   2.6404752e+01  -2.3210354e+01   3.5000000e+02  -2.0595890e+00  -4.8713471e-01  -3.3237351e+00
   2.6338428e+01  -2.3097370e+01   3.5000000e+02  -1.9227676e+00  -6.2949798e-01  -3.4614056e+00
   2.6268304e+01  -2.2986375e+01   3.5000000e+02  -1.7811334e+00  -7.7869106e-01  -3.5819262e+00
   2.6194458e+01  -2.2877477e+01   3.5000000e+02  -1.6358716e+00  -9.3383651e-01  -3.6838485e+00
   2.6116972e+01  -2.2770784e+01   3.5000000e+02  -1.4882893e+00  -1.0939869e+00  -3.7659198e+00
   2.6035928e+01  -2.2666402e+01   3.5000000e+02  -1.3397764e+00  -1.2581420e+00  -3.8271052e+00
   2.5951415e+01  -2.2564433e+01   3.5000000e+02  -1.1917825e+00  -1.4252561e+00  -3.8666046e+00
   2.5863521e+01  -2.2464976e+01   3.5000000e+02  -1.0457852e+00  -1.5942498e+00  -3.8838687e+00
   2.5772340e+01  -2.2368131e+01   3.5000000e+02  -9.0327761e-01  -1.7640097e+00  -3.8786163e+00
   2.5677967e+01  -2.2273990e+01   3.5000000e+02  -7.6573700e-01  -1.9334139e+00  -3.8508550e+00
   2.5580500e+01  -2.2182646e+01   3.5000000e+02  -6.3460909e-01  -2.1013393e+00  -3.8008967e+00
   2.5480038e+01  -2.2094189e+01   3.5000000e+02  -5.1127816e-01  -2.2666924e+00  -3.7293708e+00
   2.5376684e+01  -2.2008704e+01   3.5000000e+02  -3.9703928e-01  -2.4284401e+00  -3.6372285e+00
   2.5270544e+01  -2.1926274e+01   3.5000000e+02  -2.9306623e-01  -2.5856458e+00  -3.5257347e+00
   2.5161723e+01  -2.1846979e+01   3.5000000e+02  -2.0037387e-01  -2.7375148e+00  -3.3964388e+00
   2.5050331e+01  -2.1770896e+01   3.5000000e+02  -1.1978820e-01  -2.8834300e+00  -3.2511366e+00
   2.4936480e+01  -2.1698100e+01   3.5000000e+02  -5.1912683e-02  -3.0229904e+00  -3.0918068e+00
   2.4820282e+01  -2.1628659e+01   3.5000000e+02   2.8990841e-03  -3.1560427e+00  -2.9205264e+00
   2.4701851e+01  -2.1562642e+01   3.5000000e+02   4.4558386e-02  -3.2826885e+00  -2.7393835e+00
   2.4581305e+01  -2.1500112e+01   3.5000000e+02   7.3248846e-02  -3.4032806e+00  -2.5503749e+00
   2.4458761e+01  -2.1441130e+01   3.5000000e+02   8.9422713e-02  -3.5184010e+00  -2.3552999e+00
   2.4334339e+01  -2.1385751e+01   3.5000000e+02   9.3781439e-02  -3.6288118e+00  -2.1556678e+00
   2.4208160e+01  -2.1334030e+01   3.5000000e+02   8.7248088e-02  -3.7353909e+00  -1.9526203e+00
   2.4080347e+01  -2.1286017e+01   3.5000000e+02   7.0927666e-02  -3.8390523e+00  -1.7468740e+00
   2.3951023e+01  -2.1241756e+01   3.5000000e+02   4.6060939e-02  -3.9406590e+00  -1.5386920e+00
   2.3820312e+01  -2.1201292e+01   3.5000000e+02   1.3979130e-02  -4.0409332e+00  -1.3278929e+00
   2.3688341e+01  -2.1164662e+01   3.5000000e+02  -2.3946408e-02  -4.1403704e+00  -1.1138879e+00
   2.3555235e+01  -2.1131903e+01   3.5000000e+02  -6.6343438e-02  -4.2391743e+00  -8.9574148e-01
   2.3421124e+01  -2.1103045e+01   3.5000000e+02  -1.1187668e-01  -4.3371980e+00  -6.7226923e-01
   2.3286135e+01  -2.1078115e+01   3.5000000e+02  -1.5927367e-01  -4.4339211e+00  -4.4213103e-01
   2.3150396e+01  -2.1057139e+01   3.5000000e+02  -2.0733977e-01  -4.5284412e+00  -2.0395032e-01
   2.3014039e+01  -2.1040136e+01   3.5000000e+02  -2.5496973e-01  -4.6194869e+00   4.3565852e-02
   2.2877192e+01  -2.1027122e+01   3.5000000e+02  -3.0114801e-01  -4.7054650e+00   3.0153175e-01
   2.2739985e+01  -2.1018110e+01   3.5000000e+02  -3.4494202e-01  -4.7845146e+00   5.7077503e-01
   2.2602551e+01  -2.1013108e+01   3.5000000e+02  -3.8549449e-01  -4.8545828e+00   8.5175194e-01
   2.2465019e+01  -2.1012121e+01   3.5000000e+02  -4.2201294e-01  -4.9135173e+00   1.1444995e+00
   2.2327520e+01  -2.1015150e+01   3.5000000e+02  -4.5375784e-01  -4.9591597e+00   1.4485830e+00
   2.2190185e+01  -2.1022193e+01   3.5000000e+02  -4.8003274e-01  -4.9894489e+00   1.7630837e+00
   2.2053146e+01  -2.1033242e+01   3.5000000e+02  -5.0017950e-01  -5.0025208e+00   2.0866023e+00
   2.1916531e+01  -2.1048287e+01   3.5000000e+02  -5.1357146e-01  -4.9968058e+00   2.4173037e+00
   2.1780472e+01  -2.1067314e+01   3.5000000e+02  -5.1961206e-01  -4.9711127e+00   2.7529510e+00
   2.1645099e+01  -2.1090304e+01   3.5000000e+02  -5.1773856e-01  -4.9246979e+00   3.0909931e+00
   2.1510540e+01  -2.1117235e+01   3.5000000e+02  -5.0742328e-01  -4.8573132e+00   3.4286549e+00
   2.1376925e+01  -2.1148081e+01   3.5000000e+02  -4.8817906e-01  -4.7692300e+00   3.7630276e+00
   2.1244380e+01  -2.1182813e+01   3.5000000e+02  -4.5956525e-01  -4.6612304e+00   4.0911870e+00
   2.1113034e+01  -2.1221398e+01   3.5000000e+02  -4.2119559e-01  -4.5345780e+00   4.4102764e+00
   2.0983013e+01  -2.1263798e+01   3.5000000e+02  -3.7274950e-01  -4.3909533e+00   4.7176084e+00
   2.0854442e+01  -2.1309973e+01   3.5000000e+02  -3.1397893e-01  -4.2323726e+00   5.0107326e+00
   2.0727444e+01  -2.1359879e+01   3.5000000e+02  -2.4472418e-01  -4.0610905e+00   5.2874851e+00
   2.0602144e+01  -2.1413467e+01   3.5000000e+02  -1.6493093e-01  -3.8795032e+00   5.5460054e+00
   2.0478663e+01  -2.1470685e+01   3.5000000e+02  -7.4664733e-02  -3.6900418e+00   5.7847525e+00
   2.0357120e+01  -2.1531480e+01   3.5000000e+02   2.5875314e-02  -3.4950868e+00   6.0024854e+00
   2.0237635e+01  -2.1595791e+01   3.5000000e+02   1.3632921e-01  -3.2969018e+00   6.1982281e+00
   2.0120326e+01  -2.1663558e+01   3.5000000e+02   2.5617889e-01  -3.0975784e+00   6.3712442e+00
   2.0005307e+01  -2.1734714e+01   3.5000000e+02   3.8472846e-01  -2.8990020e+00   6.5210034e+00
   1.9892693e+01  -2.1809191e+01   3.5000000e+02   5.2111580e-01  -2.7028480e+00   6.6471453e+00
   1.9782595e+01  -2.1886917e+01   3.5000000e+02   6.6431664e-01  -2.5105758e+00   6.7494634e+00
   1.9675124e+01  -2.1967816e+01   3.5000000e+02   8.1316152e-01  -2.3234483e+00   6.8278860e+00
   1.9570388e+01  -2.2051811e+01   3.5000000e+02   9.6636491e-01  -2.1425463e+00   6.8824703e+00
   1.9468492e+01  -2.2138818e+01   3.5000000e+02   1.1225418e+00  -1.9687892e+00   6.9134026e+00
   1.9369541e+01  -2.2228755e+01   3.5000000e+02   1.2802548e+00  -1.8029633e+00   6.9209928e+00
   1.9273635e+01  -2.2321533e+01   3.5000000e+02   1.4380264e+00  -1.6457326e+00   6.9056851e+00
   1.9180874e+01  -2.2417061e+01   3.5000000e+02   1.5943766e+00  -1.4976654e+00   6.8680546e+00
   1.9091353e+01  -2.2515247e+01   3.5000000e+02   1.7478482e+00  -1.3592423e+00   6.8088093e+00
   1.9005168e+01  -2.2615993e+01   3.5000000e+02   1.8970193e+00  -1.2308781e+00   6.7287919e+00
   1.8922409e+01  -2.2719203e+01   3.5000000e+02   2.0405320e+00  -1.1129220e+00   6.6289704e+00
   1.8843164e+01  -2.2824773e+01   3.5000000e+02   2.1770902e+00  -1.0056701e+00   6.5104431e+00
   1.8767518e+01  -2.2932601e+01   3.5000000e+02   2.3054862e+00  -9.0937116e-01   6.3744180e+00
   1.8695556e+01  -2.3042579e+01   3.5000000e+02   2.4245984e+00  -8.2423156e-01   6.2222121e+00
   1.8627356e+01  -2.3154600e+01   3.5000000e+02   2.5334077e+00  -7.5040358e-01   6.0552288e+00
   1.8562994e+01  -2.3268552e+01   3.5000000e+02   2.6309970e+00  -6.8798715e-01   5.8749478e+00
   1.8502543e+01  -2.3384322e+01   3.5000000e+02   2.7165616e+00  -6.3702159e-01   5.6828988e+00
   1.8446075e+01  -2.3501796e+01   3.5000000e+02   2.7894126e+00  -5.9747942e-01   5.4806365e+00
   1.8393654e+01  -2.3620856e+01   3.5000000e+02   2.8489712e+00  -5.6924124e-01   5.2697230e+00
   1.8345344e+01  -2.3741382e+01   3.5000000e+02   2.8947715e+00  -5.5210069e-01   5.0516983e+00
   1.8301205e+01  -2.3863256e+01   3.5000000e+02   2.9264543e+00  -5.4575163e-01   4.8280510e+00
   1.8261291e+01  -2.3986353e+01   3.5000000e+02   2.9437535e+00  -5.4977477e-01   4.6002207e+00
   1.8225656e+01  -2.4110551e+01   3.5000000e+02   2.9464960e+00  -5.6365465e-01   4.3695663e+00
   1.8194347e+01  -2.4235723e+01   3.5000000e+02   2.9345894e+00  -5.8676725e-01   4.1373821e+00
   1.8167407e+01  -2.4361744e+01   3.5000000e+02   2.9080233e+00  -6.1839984e-01   3.9048879e+00
   1.8144879e+01  -2.4488485e+01   3.5000000e+02   2.8668757e+00  -6.5776875e-01   3.6732471e+00
   1.8126796e+01  -2.4615817e+01   3.5000000e+02   2.8113182e+00  -7.0402095e-01   3.4435755e+00
   1.8113192e+01  -2.4743611e+01   3.5000000e+02   2.7416372e+00  -7.5627328e-01   3.2169444e+00
   1.8104094e+01  -2.4871735e+01   3.5000000e+02   2.6582487e+00  -8.1361585e-01   2.9943938e+00
   1.8099525e+01  -2.5000059e+01   3.5000000e+02   2.5617151e+00  -8.7513976e-01   2.7769184e+00
   1.8099504e+01  -2.5128449e+01   3.5000000e+02   2.4527616e+00  -9.3995161e-01   2.5654653e+00
   1.8104045e+01  -2.5256773e+01   3.5000000e+02   2.3322746e+00  -1.0071908e+00   2.3609050e+00
   1.8113158e+01  -2.5384899e+01   3.5000000e+02   2.2012960e+00  -1.0760426e+00   2.1640080e+00
   1.8126848e+01  -2.5512693e+01   3.5000000e+02   2.0610047e+00  -1.1457453e+00   1.9754215e+00
   1.8145116e+01  -2.5640021e+01   3.5000000e+02   1.9126821e+00  -1.2155985e+00   1.7956374e+00
   1.8167958e+01  -2.5766751e+01   3.5000000e+02   1.7576653e+00  -1.2849626e+00   1.6249702e+00
   1.8195363e+01  -2.5892749e+01   3.5000000e+02   1.5973000e+00  -1.3532513e+00   1.4635502e+00
   1.8227318e+01  -2.6017883e+01   3.5000000e+02   1.4328806e+00  -1.4199337e+00   1.3113115e+00
   1.8263805e+01  -2.6142020e+01   3.5000000e+02   1.2655988e+00  -1.4845167e+00   1.1680077e+00
   1.8304799e+01  -2.6265030e+01   3.5000000e+02   1.0964874e+00  -1.5465296e+00   1.0332335e+00
   1.8350270e+01  -2.6386779e+01   3.5000000e+02   9.2639156e-01  -1.6055130e+00   9.0646159e-01
   1.8400186e+01  -2.6507140e+01   3.5000000e+02   7.5592673e-01  -1.6610092e+00   7.8707597e-01
   1.8454507e+01  -2.6625982e+01   3.5000000e+02   5.8548585e-01  -1.7125452e+00   6.7443537e-01
   1.8513188e+01  -2.6743179e+01   3.5000000e+02   4.1523691e-01  -1.7596307e+00   5.6791714e-01
   1.8576181e+01  -2.6858603e+01   3.5000000e+02   2.4516048e-01  -1.8017634e+00   4.6696632e-01
   1.8643430e+01  -2.6972130e+01   3.5000000e+02   7.5088090e-02  -1.8384288e+00   3.7114164e-01
   1.8714876e+01  -2.7083636e+01   3.5000000e+02  -9.5235419e-02  -1.8691216e+00   2.8013958e-01
   1.8790455e+01  -2.7192999e+01   3.5000000e+02  -2.6608797e-01  -1.8933608e+00   1.9381133e-01
   1.8870096e+01  -2.7300101e+01   3.5000000e+02  -4.3770354e-01  -1.9107077e+00   1.1216476e-01
   1.8953724e+01  -2.7404824e+01   3.5000000e+02  -6.1020458e-01  -1.9207924e+00   3.5342270e-02
   1.9041259e+01  -2.7507052e+01   3.5000000e+02  -7.8355089e-01  -1.9233301e+00  -3.6409818e-02
   1.9132616e+01  -2.7606672e+01   3.5000000e+02  -9.5750287e-01  -1.9181329e+00  -1.0278308e-01
   1.9227705e+01  -2.7703575e+01   3.5000000e+02  -1.1316034e+00  -1.9051138e+00  -1.6345378e-01
   1.9326430e+01  -2.7797652e+01   3.5000000e+02  -1.3051732e+00  -1.8842841e+00  -2.1813183e-01
   1.9428692e+01  -2.7888798e+01   3.5000000e+02  -1.4773382e+00  -1.8557384e+00  -2.6660380e-01
   1.9534387e+01  -2.7976912e+01   3.5000000e+02  -1.6470644e+00  -1.8196293e+00  -3.0875920e-01
   1.9643403e+01  -2.8061895e+01   3.5000000e+02  -1.8132025e+00  -1.7761397e+00  -3.4460262e-01
   1.9755629e+01  -2.8143652e+01   3.5000000e+02  -1.9745511e+00  -1.7254513e+00  -3.7425923e-01
   1.9870945e+01  -2.8222089e+01   3.5000000e+02  -2.1299013e+00  -1.6677128e+00  -3.9794461e-01
   1.9989228e+01  -2.8297119e+01   3.5000000e+02  -2.2780969e+00  -1.6030109e+00  -4.1592719e-01
   2.0110352e+01  -2.8368657e+01   3.5000000e+02  -2.4180690e+00  -1.5313562e+00  -4.2848690e-01
   2.0234185e+01  -2.8436620e+01   3.5000000e+02  -2.5488626e+00  -1.4526772e+00  -4.3585980e-01
   2.0360592e+01  -2.8500932e+01   3.5000000e+02  -2.6696576e+00  -1.3668224e+00  -4.3818047e-01
   2.0489434e+01  -2.8561520e+01   3.5000000e+02  -2.7797687e+00  -1.2735822e+00  -4.3544153e-01
   2.0620570e+01  -2.8618313e+01   3.5000000e+02  -2.8786417e+00  -1.1727173e+00  -4.2746258e-01
   2.0753853e+01  -2.8671247e+01   3.5000000e+02  -2.9658440e+00  -1.0639956e+00  -4.1385478e-01
   2.0889134e+01  -2.8720262e+01   3.5000000e+02  -3.0410534e+00  -9.4723651e-01  -3.9402274e-01
   2.1026261e+01  -2.8765300e+01   3.5000000e+02  -3.1040474e+00  -8.2235984e-01  -3.6717549e-01
   2.1165080e+01  -2.8806309e+01   3.5000000e+02  -3.1546994e+00  -6.8943280e-01  -3.3233954e-01
   2.1305433e+01  -2.8843244e+01   3.5000000e+02  -3.1929785e+00  -5.4872113e-01  -2.8839012e-01
   2.1447160e+01  -2.8876060e+01   3.5000000e+02  -3.2189555e+00  -4.0073631e-01  -2.3411604e-01
   2.1590100e+01  -2.8904720e+01   3.5000000e+02  -3.2328163e+00  -2.4627347e-01  -1.6826188e-01
   2.1734090e+01  -2.8929190e+01   3.5000000e+02  -3.2348774e+00  -8.6445515e-02  -8.9611717e-02
   2.1878962e+01  -2.8949443e+01   3.5000000e+02  -3.2256038e+00   7.7295354e-02   2.9344954e-03
   2.2024552e+01  -2.8965454e+01   3.5000000e+02  -3.2056259e+00   2.4316881e-01   1.1025971e-01
   2.2170691e+01  -2.8977206e+01   3.5000000e+02  -3.1757512e+00   4.0908071e-01   2.3294581e-01
   2.2317210e+01  -2.8984684e+01   3.5000000e+02  -3.1369695e+00   5.7268140e-01   3.7117086e-01
   2.2463940e+01  -2.8987880e+01   3.5000000e+02  -3.0904464e+00   7.3144411e-01   5.2464348e-01
   2.2610713e+01  -2.8986789e+01   3.5000000e+02  -3.0375064e+00   8.8277049e-01   6.9254176e-01
   2.2757357e+01  -2.8981415e+01   3.5000000e+02  -2.9796026e+00   1.0241042e+00   8.7349603e-01
   2.2903704e+01  -2.8971761e+01   3.5000000e+02  -2.9182770e+00   1.1530722e+00   1.0655926e+00
   2.3049584e+01  -2.8957841e+01   3.5000000e+02  -2.8551079e+00   1.2675979e+00   1.2664413e+00
   2.3194830e+01  -2.8939670e+01   3.5000000e+02  -2.7916578e+00   1.3660188e+00   1.4732529e+00
   2.3339274e+01  -2.8917268e+01   3.5000000e+02  -2.7294187e+00   1.4471642e+00   1.6829570e+00
   2.4096253e+01  -2.8862791e+01   3.5000000e+02  -2.3314224e+00   1.4937368e+00   2.8962911e+00
   2.4232789e+01  -2.8815636e+01   3.5000000e+02  -2.2946256e+00   1.4702406e+00   3.0536708e+00
   2.4367451e+01  -2.8764641e+01   3.5000000e+02  -2.2651666e+00   1.4354005e+00   3.1960334e+00
   2.4500096e+01  -2.8709861e+01   3.5000000e+02  -2.2430713e+00   1.3910970e+00   3.3222483e+00
   2.4630585e+01  -2.8651355e+01   3.5000000e+02  -2.2282224e+00   1.3392289e+00   3.4315789e+00
   2.4758781e+01  -2.8589188e+01   3.5000000e+02  -2.2203871e+00   1.2816491e+00   3.5236423e+00
   2.4884551e+01  -2.8523425e+01   3.5000000e+02  -2.2192506e+00   1.2201206e+00   3.5983555e+00
   2.5007765e+01  -2.8454138e+01   3.5000000e+02  -2.2244350e+00   1.1562816e+00   3.6558900e+00
   2.5128297e+01  -2.8381402e+01   3.5000000e+02  -2.2355273e+00   1.0916303e+00   3.6966181e+00
   2.5246025e+01  -2.8305293e+01   3.5000000e+02  -2.2521025e+00   1.0275172e+00   3.7210665e+00
   2.5360828e+01  -2.8225895e+01   3.5000000e+02  -2.2737365e+00   9.6514226e-01   3.7298837e+00
   2.5472593e+01  -2.8143290e+01   3.5000000e+02  -2.3000290e+00   9.0555408e-01   3.7238028e+00
   2.5581209e+01  -2.8057568e+01   3.5000000e+02  -2.3306104e+00   8.4964824e-01   3.7036205e+00
   2.5686569e+01  -2.7968819e+01   3.5000000e+02  -2.3651597e+00   7.9816742e-01   3.6701645e+00
   2.5788570e+01  -2.7877136e+01   3.5000000e+02  -2.4034072e+00   7.5169379e-01   3.6242702e+00
   2.5887114e+01  -2.7782618e+01   3.5000000e+02  -2.4451307e+00   7.1063912e-01   3.5667575e+00
   2.5982109e+01  -2.7685362e+01   3.5000000e+02  -2.4901561e+00   6.7524273e-01   3.4983905e+00
   2.6073464e+01  -2.7585471e+01   3.5000000e+02  -2.5383351e+00   6.4556881e-01   3.4198535e+00
   2.6161095e+01  -2.7483050e+01   3.5000000e+02  -2.5895209e+00   6.2150641e-01   3.3317205e+00
   2.6244923e+01  -2.7378205e+01   3.5000000e+02  -2.6435369e+00   6.0278332e-01   3.2344301e+00
   2.6324871e+01  -2.7271044e+01   3.5000000e+02  -2.7001396e+00   5.8898819e-01   3.1282740e+00
   2.6400870e+01  -2.7161679e+01   3.5000000e+02  -2.7589758e+00   5.7959134e-01   3.0134060e+00
   2.6472853e+01  -2.7050223e+01   3.5000000e+02  -2.8195552e+00   5.7398551e-01   2.8898548e+00
   2.6540758e+01  -2.6936789e+01   3.5000000e+02  -2.8812277e+00   5.7151941e-01   2.7575599e+00
   2.6604530e+01  -2.6821495e+01   3.5000000e+02  -2.9431716e+00   5.7152871e-01   2.6164286e+00
   2.6664117e+01  -2.6704458e+01   3.5000000e+02  -3.0044124e+00   5.7337346e-01   2.4663807e+00
   2.6719472e+01  -2.6585797e+01   3.5000000e+02  -3.0638495e+00   5.7645892e-01   2.3074103e+00
   2.6770551e+01  -2.6465632e+01   3.5000000e+02  -3.1203056e+00   5.8025313e-01   2.1396321e+00
   2.6817318e+01  -2.6344085e+01   3.5000000e+02  -3.1725836e+00   5.8428934e-01   1.9633223e+00
   2.6859740e+01  -2.6221278e+01   3.5000000e+02  -3.2195360e+00   5.8816864e-01   1.7789311e+00
   2.6897788e+01  -2.6097334e+01   3.5000000e+02  -3.2601289e+00   5.9154936e-01   1.5870837e+00
   2.6931439e+01  -2.5972378e+01   3.5000000e+02  -3.2934983e+00   5.9413053e-01   1.3885639e+00
   2.6960673e+01  -2.5846533e+01   3.5000000e+02  -3.3189975e+00   5.9563616e-01   1.1842679e+00
   2.6985477e+01  -2.5719925e+01   3.5000000e+02  -3.3362202e+00   5.9579126e-01   9.7516934e-01
   2.7005839e+01  -2.5592680e+01   3.5000000e+02  -3.3450100e+00   5.9430609e-01   7.6225347e-01
   2.7021754e+01  -2.5464922e+01   3.5000000e+02  -3.3454442e+00   5.9085421e-01   5.4646440e-01
   2.7033221e+01  -2.5336777e+01   3.5000000e+02  -3.3378009e+00   5.8505900e-01   3.2866036e-01
   2.7040243e+01  -2.5208372e+01   3.5000000e+02  -3.3225091e+00   5.7648337e-01   1.0957350e-01
   2.7042827e+01  -2.5079831e+01   3.5000000e+02  -3.3000862e+00   5.6462400e-01  -1.1022002e-01
   2.7040984e+01  -2.4951279e+01   3.5000000e+02  -3.2710698e+00   5.4891154e-01  -3.3029712e-01
   2.7034731e+01  -2.4822841e+01   3.5000000e+02  -3.2359497e+00   5.2871591e-01  -5.5037151e-01
   2.7024088e+01  -2.4694643e+01   3.5000000e+02  -3.1951066e+00   5.0335986e-01  -7.7025902e-01
   2.7009076e+01  -2.4566806e+01   3.5000000e+02  -3.1487619e+00   4.7213543e-01  -9.8983596e-01
   2.6989726e+01  -2.4439455e+01   3.5000000e+02  -3.0969538e+00   4.3432637e-01  -1.2089494e+00
   2.6966067e+01  -2.4312712e+01   3.5000000e+02  -3.0395274e+00   3.8923706e-01  -1.4273687e+00
   2.6938135e+01  -2.4186697e+01   3.5000000e+02  -2.9761571e+00   3.3622056e-01  -1.6447055e+00
   2.6905970e+01  -2.4061531e+01   3.5000000e+02  -2.9063911e+00   2.7471257e-01  -1.8603542e+00
   2.6869613e+01  -2.3937333e+01   3.5000000e+02  -2.8297107e+00   2.0426080e-01  -2.0734601e+00
   2.6829112e+01  -2.3814220e+01   3.5000000e+02  -2.7456076e+00   1.2455114e-01  -2.2828996e+00
   2.6784515e+01  -2.3692310e+01   3.5000000e+02  -2.6536578e+00   3.5429675e-02  -2.4872942e+00
   2.6735876e+01  -2.3571717e+01   3.5000000e+02  -2.5535918e+00  -6.3089023e-02  -2.6850498e+00
   2.6683251e+01  -2.3452554e+01   3.5000000e+02  -2.4453478e+00  -1.7081889e-01  -2.8744127e+00
   2.6626700e+01  -2.3334934e+01   3.5000000e+02  -2.3291075e+00  -2.8740932e-01  -3.0535353e+00
   2.6566286e+01  -2.3218967e+01   3.5000000e+02  -2.2053053e+00  -4.1236398e-01  -3.2205532e+00
   2.6502074e+01  -2.3104761e+01   3.5000000e+02  -2.0746192e+00  -5.4506241e-01  -3.3736499e+00
   2.6434133e+01  -2.2992422e+01   3.5000000e+02  -1.9379478e+00  -6.8478304e-01  -3.5111111e+00
   2.6362536e+01  -2.2882056e+01   3.5000000e+02  -1.7963779e+00  -8.3072341e-01  -3.6313661e+00
   2.6287357e+01  -2.2773764e+01   3.5000000e+02  -1.6511406e+00  -9.8202504e-01  -3.7330231e+00
   2.6208673e+01  -2.2667647e+01   3.5000000e+02  -1.5035801e+00  -1.1377810e+00  -3.8148836e+00
   2.6126565e+01  -2.2563803e+01   3.5000000e+02  -1.3551200e+00  -1.2970458e+00  -3.8759603e+00
   2.6041115e+01  -2.2462328e+01   3.5000000e+02  -1.2072346e+00  -1.4588403e+00  -3.9154909e+00
   2.5952409e+01  -2.2363316e+01   3.5000000e+02  -1.0614275e+00  -1.6221524e+00  -3.9329538e+00
   2.5860534e+01  -2.2266857e+01   3.5000000e+02  -9.1920762e-01  -1.7859443e+00  -3.9280870e+00
   2.5765580e+01  -2.2173041e+01   3.5000000e+02  -7.8207157e-01  -1.9491563e+00  -3.9009082e+00
   2.5667641e+01  -2.2081952e+01   3.5000000e+02  -6.5147804e-01  -2.1107252e+00  -3.8517367e+00
   2.5566809e+01  -2.1993676e+01   3.5000000e+02  -5.2882116e-01  -2.2696059e+00  -3.7812049e+00
   2.5463183e+01  -2.1908291e+01   3.5000000e+02  -4.1540227e-01  -2.4248019e+00  -3.6902700e+00
   2.5356861e+01  -2.1825877e+01   3.5000000e+02  -3.1239620e-01  -2.5754024e+00  -3.5802042e+00
   2.5247944e+01  -2.1746508e+01   3.5000000e+02  -2.2081618e-01  -2.7206265e+00  -3.4525742e+00
   2.5136533e+01  -2.1670257e+01   3.5000000e+02  -1.4148070e-01  -2.8598654e+00  -3.3091991e+00
   2.5022735e+01  -2.1597193e+01   3.5000000e+02  -7.4984798e-02  -2.9927180e+00  -3.1520964e+00
   2.4906654e+01  -2.1527383e+01   3.5000000e+02  -2.1671186e-02  -3.1190293e+00  -2.9833962e+00
   2.4788398e+01  -2.1460889e+01   3.5000000e+02   1.8383186e-02  -3.2389028e+00  -2.8052552e+00
   2.4668077e+01  -2.1397772e+01   3.5000000e+02   4.5373832e-02  -3.3527019e+00  -2.6197548e+00
   2.4545802e+01  -2.1338090e+01   3.5000000e+02   5.9763394e-02  -3.4610315e+00  -2.4287942e+00
   2.4421685e+01  -2.1281896e+01   3.5000000e+02   6.2262350e-02  -3.5646977e+00  -2.2339911e+00
   2.4295839e+01  -2.1229241e+01   3.5000000e+02   5.3798538e-02  -3.6646464e+00  -2.0365970e+00
   2.4168379e+01  -2.1180172e+01   3.5000000e+02   3.5476645e-02  -3.7618857e+00  -1.8374354e+00
   2.4039421e+01  -2.1134735e+01   3.5000000e+02   8.5324855e-03  -3.8573999e+00  -1.6368661e+00
   2.3909081e+01  -2.1092970e+01   3.5000000e+02  -2.5718375e-02  -3.9520588e+00  -1.4347776e+00
   2.3777478e+01  -2.1054914e+01   3.5000000e+02  -6.5927840e-02  -4.0465290e+00  -1.2306212e+00
   2.3644730e+01  -2.1020603e+01   3.5000000e+02  -1.1075812e-01  -4.1412012e+00  -1.0234628e+00
   2.3510958e+01  -2.0990066e+01   3.5000000e+02  -1.5891991e-01  -4.2361264e+00  -8.1206996e-01
   2.3376280e+01  -2.0963332e+01   3.5000000e+02  -2.0919666e-01  -4.3309838e+00  -5.9500431e-01
   2.3240818e+01  -2.0940424e+01   3.5000000e+02  -2.6046271e-01  -4.4250575e+00  -3.7074322e-01
   2.3104694e+01  -2.0921363e+01   3.5000000e+02  -3.1168892e-01  -4.5172481e+00  -1.3778912e-01
   2.2968029e+01  -2.0906167e+01   3.5000000e+02  -3.6194221e-01  -4.6061026e+00   1.0522080e-01
   2.2830946e+01  -2.0894848e+01   3.5000000e+02  -4.1037897e-01  -4.6898609e+00   3.5940554e-01
   2.2693567e+01  -2.0887418e+01   3.5000000e+02  -4.5622985e-01  -4.7665268e+00   6.2555777e-01
   2.2556015e+01  -2.0883882e+01   3.5000000e+02  -4.9878965e-01  -4.8339448e+00   9.0406652e-01
   2.2418413e+01  -2.0884244e+01   3.5000000e+02  -5.3739908e-01  -4.8898944e+00   1.1948690e+00
   2.2280884e+01  -2.0888504e+01   3.5000000e+02  -5.7143382e-01  -4.9321861e+00   1.4974203e+00
   2.2143550e+01  -2.0896658e+01   3.5000000e+02  -6.0029457e-01  -4.9587615e+00   1.8106882e+00
   2.2006536e+01  -2.0908698e+01   3.5000000e+02  -6.2339918e-01  -4.9677908e+00   2.1331613e+00
   2.1869962e+01  -2.0924614e+01   3.5000000e+02  -6.4017955e-01  -4.9577648e+00   2.4629069e+00
   2.1733952e+01  -2.0944391e+01   3.5000000e+02  -6.5008172e-01  -4.9275731e+00   2.7976097e+00
   2.1598626e+01  -2.0968012e+01   3.5000000e+02  -6.5256732e-01  -4.8765669e+00   3.1346712e+00
   2.1464108e+01  -2.0995455e+01   3.5000000e+02  -6.4711883e-01  -4.8046020e+00   3.4712828e+00
   2.1330516e+01  -2.1026695e+01   3.5000000e+02  -6.3324491e-01  -4.7120495e+00   3.8045532e+00
   2.1197972e+01  -2.1061705e+01   3.5000000e+02  -6.1048355e-01  -4.5997891e+00   4.1315899e+00
   2.1066595e+01  -2.1100453e+01   3.5000000e+02  -5.7841346e-01  -4.4691635e+00   4.4496129e+00
   2.0936503e+01  -2.1142903e+01   3.5000000e+02  -5.3666133e-01  -4.3219126e+00   4.7560361e+00
   2.0807815e+01  -2.1189019e+01   3.5000000e+02  -4.8490718e-01  -4.1600898e+00   5.0485311e+00
   2.0680646e+01  -2.1238757e+01   3.5000000e+02  -4.2290812e-01  -3.9859545e+00   5.3250763e+00
   2.0555112e+01  -2.1292074e+01   3.5000000e+02  -3.5050266e-01  -3.8018762e+00   5.5839680e+00
   2.0431329e+01  -2.1348920e+01   3.5000000e+02  -2.6764080e-01  -3.6102342e+00   5.8238138e+00
   2.0309409e+01  -2.1409245e+01   3.5000000e+02  -1.7439445e-01  -3.4133267e+00   6.0435194e+00
   2.0189464e+01  -2.1472994e+01   3.5000000e+02  -7.0984440e-02  -3.2133102e+00   6.2422423e+00
   2.0071604e+01  -2.1540108e+01   3.5000000e+02   4.2203832e-02  -3.0121517e+00   6.4193560e+00
   1.9955939e+01  -2.1610529e+01   3.5000000e+02   1.6461773e-01  -2.8116085e+00   6.5744085e+00
   1.9842576e+01  -2.1684190e+01   3.5000000e+02   2.9551690e-01  -2.6132187e+00   6.7070919e+00
   1.9731622e+01  -2.1761026e+01   3.5000000e+02   4.3399724e-01  -2.4183160e+00   6.8172159e+00
   1.9623179e+01  -2.1840966e+01   3.5000000e+02   5.7899109e-01  -2.2280403e+00   6.9046982e+00
   1.9517350e+01  -2.1923938e+01   3.5000000e+02   7.2929773e-01  -2.0433722e+00   6.9695520e+00
   1.9414236e+01  -2.2009866e+01   3.5000000e+02   8.8360542e-01  -1.8651531e+00   7.0118897e+00
   1.9313935e+01  -2.2098672e+01   3.5000000e+02   1.0405256e+00  -1.6941072e+00   7.0319272e+00
   1.9216543e+01  -2.2190274e+01   3.5000000e+02   1.1986200e+00  -1.5308638e+00   7.0299888e+00
   1.9122155e+01  -2.2284588e+01   3.5000000e+02   1.3564345e+00  -1.3759763e+00   7.0065110e+00
   1.9030862e+01  -2.2381528e+01   3.5000000e+02   1.5125240e+00  -1.2299312e+00   6.9620471e+00
   1.8942755e+01  -2.2481005e+01   3.5000000e+02   1.6654735e+00  -1.0931657e+00   6.8972679e+00
   1.8857919e+01  -2.2582927e+01   3.5000000e+02   1.8139148e+00  -9.6606622e-01   6.8129632e+00
   1.8776441e+01  -2.2687201e+01   3.5000000e+02   1.9565450e+00  -8.4898856e-01   6.7100361e+00
   1.8698403e+01  -2.2793729e+01   3.5000000e+02   2.0921304e+00  -7.4224879e-01   6.5895047e+00
   1.8623884e+01  -2.2902414e+01   3.5000000e+02   2.2195250e+00  -6.4612935e-01   6.4524896e+00
   1.8552961e+01  -2.3013155e+01   3.5000000e+02   2.3376717e+00  -5.6087775e-01   6.3002109e+00
   1.8485708e+01  -2.3125849e+01   3.5000000e+02   2.4456129e+00  -4.8670008e-01   6.1339756e+00
   1.8422197e+01  -2.3240390e+01   3.5000000e+02   2.5424968e+00  -4.2375414e-01   5.9551645e+00
   1.8362495e+01  -2.3356673e+01   3.5000000e+02   2.6275859e+00  -3.7213486e-01   5.7652078e+00
   1.8306669e+01  -2.3474588e+01   3.5000000e+02   2.7002556e+00  -3.3186796e-01   5.5655733e+00
   1.8254781e+01  -2.3594025e+01   3.5000000e+02   2.7599975e+00  -3.0289033e-01   5.3577348e+00
   1.8206889e+01  -2.3714872e+01   3.5000000e+02   2.8064126e+00  -2.8503926e-01   5.1431523e+00
   1.8163049e+01  -2.3837014e+01   3.5000000e+02   2.8392047e+00  -2.7804674e-01   4.9232524e+00
   1.8123314e+01  -2.3960337e+01   3.5000000e+02   2.8581713e+00  -2.8153560e-01   4.6994041e+00
   1.8087733e+01  -2.4084724e+01   3.5000000e+02   2.8631899e+00  -2.9501602e-01   4.4729171e+00
   1.8056352e+01  -2.4210057e+01   3.5000000e+02   2.8542102e+00  -3.1789454e-01   4.2450352e+00
   1.8029211e+01  -2.4336217e+01   3.5000000e+02   2.8312482e+00  -3.4947960e-01   4.0169417e+00
   1.8006351e+01  -2.4463082e+01   3.5000000e+02   2.7943915e+00  -3.8900814e-01   3.7897698e+00
   1.7987804e+01  -2.4590533e+01   3.5000000e+02   2.7438023e+00  -4.3564922e-01   3.5646062e+00
   1.7973603e+01  -2.4718446e+01   3.5000000e+02   2.6797390e+00  -4.8853681e-01   3.3425101e+00
   1.7963774e+01  -2.4846698e+01   3.5000000e+02   2.6025692e+00  -5.4677905e-01   3.1245094e+00
   1.7958339e+01  -2.4975166e+01   3.5000000e+02   2.5127906e+00  -6.0948245e-01   2.9115974e+00
   1.7957318e+01  -2.5103725e+01   3.5000000e+02   2.4110485e+00  -6.7577214e-01   2.7047218e+00
   1.7960726e+01  -2.5232251e+01   3.5000000e+02   2.2981396e+00  -7.4480387e-01   2.5047607e+00
   1.7968574e+01  -2.5360618e+01   3.5000000e+02   2.1750124e+00  -8.1577722e-01   2.3125003e+00
   1.7980868e+01  -2.5488700e+01   3.5000000e+02   2.0427502e+00  -8.8794486e-01   2.1286036e+00
   1.7997609e+01  -2.5616372e+01   3.5000000e+02   1.9025424e+00  -9.6061903e-01   1.9535813e+00
   1.8018797e+01  -2.5743509e+01   3.5000000e+02   1.7556479e+00  -1.0331799e+00   1.7877673e+00
   1.8044425e+01  -2.5869984e+01   3.5000000e+02   1.6033491e+00  -1.1050622e+00   1.6313106e+00
   1.8074481e+01  -2.5995673e+01   3.5000000e+02   1.4468947e+00  -1.1757540e+00   1.4841639e+00
   1.8108951e+01  -2.6120450e+01   3.5000000e+02   1.2874529e+00  -1.2447891e+00   1.3460933e+00
   1.8147814e+01  -2.6244192e+01   3.5000000e+02   1.1260551e+00  -1.3117265e+00   1.2166986e+00
   1.8191046e+01  -2.6366774e+01   3.5000000e+02   9.6356069e-01  -1.3761418e+00   1.0954450e+00
   1.8238617e+01  -2.6488074e+01   3.5000000e+02   8.0062018e-01  -1.4376078e+00   9.8170401e-01
   1.8290494e+01  -2.6607968e+01   3.5000000e+02   6.3766586e-01  -1.4956882e+00   8.7480192e-01
   1.8346639e+01  -2.6726337e+01   3.5000000e+02   4.7490413e-01  -1.5499261e+00   7.7407006e-01
   1.8407007e+01  -2.6843059e+01   3.5000000e+02   3.1234559e-01  -1.5998409e+00   6.7890108e-01
   1.8471551e+01  -2.6958016e+01   3.5000000e+02   1.4983098e-01  -1.6449397e+00   5.8878535e-01
   1.8540219e+01  -2.7071091e+01   3.5000000e+02  -1.2914246e-02  -1.6847243e+00   5.0334998e-01
   1.8612953e+01  -2.7182167e+01   3.5000000e+02  -1.7621764e-01  -1.7187081e+00   4.2238077e-01
   1.8689691e+01  -2.7291131e+01   3.5000000e+02  -3.4039945e-01  -1.7464377e+00   3.4582517e-01
   1.8770366e+01  -2.7397869e+01   3.5000000e+02  -5.0570098e-01  -1.7675159e+00   2.7378189e-01
   1.8854906e+01  -2.7502272e+01   3.5000000e+02  -6.7223311e-01  -1.7816202e+00   2.0647550e-01
   1.8943236e+01  -2.7604231e+01   3.5000000e+02  -8.3992452e-01  -1.7885227e+00   1.4421367e-01
   1.9035274e+01  -2.7703640e+01   3.5000000e+02  -1.0084925e+00  -1.7880962e+00   8.7345257e-02
   1.9130935e+01  -2.7800395e+01   3.5000000e+02  -1.1774317e+00  -1.7803190e+00   3.6203869e-02
   1.9230129e+01  -2.7894394e+01   3.5000000e+02  -1.3460212e+00  -1.7652656e+00  -8.9385003e-03
   1.9332762e+01  -2.7985538e+01   3.5000000e+02  -1.5133515e+00  -1.7430890e+00  -4.7912534e-02
   1.9438735e+01  -2.8073732e+01   3.5000000e+02  -1.6783655e+00  -1.7139941e+00  -8.0676424e-02
   1.9547944e+01  -2.8158881e+01   3.5000000e+02  -1.8399057e+00  -1.6782099e+00  -1.0733102e-01
   1.9660282e+01  -2.8240897e+01   3.5000000e+02  -1.9967778e+00  -1.6359509e+00  -1.2810688e-01
   1.9775638e+01  -2.8319690e+01   3.5000000e+02  -2.1477954e+00  -1.5873922e+00  -1.4334898e-01
   1.9893896e+01  -2.8395178e+01   3.5000000e+02  -2.2918366e+00  -1.5326348e+00  -1.5346254e-01
   2.0014936e+01  -2.8467279e+01   3.5000000e+02  -2.4278744e+00  -1.4716945e+00  -1.5887482e-01
   2.0138635e+01  -2.8535917e+01   3.5000000e+02  -2.5550069e+00  -1.4044897e+00  -1.5997177e-01
   2.0264866e+01  -2.8601016e+01   3.5000000e+02  -2.6724637e+00  -1.3308513e+00  -1.5705285e-01
   2.0393498e+01  -2.8662508e+01   3.5000000e+02  -2.7796112e+00  -1.2505329e+00  -1.5026863e-01
   2.0524398e+01  -2.8720326e+01   3.5000000e+02  -2.8759398e+00  -1.1632416e+00  -1.3959752e-01
   2.0657429e+01  -2.8774407e+01   3.5000000e+02  -2.9610505e+00  -1.0686710e+00  -1.2481353e-01
   2.0792450e+01  -2.8824692e+01   3.5000000e+02  -3.0346389e+00  -9.6654165e-01  -1.0547513e-01
   2.0929318e+01  -2.8871127e+01   3.5000000e+02  -3.0964827e+00  -8.5664347e-01  -8.0926600e-02
   2.1067889e+01  -2.8913662e+01   3.5000000e+02  -3.1464311e+00  -7.3888092e-01  -5.0314807e-02
   2.1208013e+01  -2.8952250e+01   3.5000000e+02  -3.1844010e+00  -6.1332311e-01  -1.2615372e-02
   2.1349541e+01  -2.8986849e+01   3.5000000e+02  -3.2103836e+00  -4.8024319e-01   3.3331187e-02
   2.1492320e+01  -2.9017421e+01   3.5000000e+02  -3.2244539e+00  -3.4016515e-01   8.8770964e-02
   2.1636196e+01  -2.9043932e+01   3.5000000e+02  -3.2267895e+00  -1.9389849e-01   1.5497574e-01
   2.1781013e+01  -2.9066355e+01   3.5000000e+02  -3.2176906e+00  -4.2567263e-02   2.3317871e-01
   2.1926614e+01  -2.9084663e+01   3.5000000e+02  -3.1976039e+00   1.1237684e-01   3.2447673e-01
   2.2072840e+01  -2.9098837e+01   3.5000000e+02  -3.1671419e+00   2.6915808e-01   4.2975901e-01
   2.2219533e+01  -2.9108862e+01   3.5000000e+02  -3.1270982e+00   4.2570815e-01   5.4960791e-01
   2.2366531e+01  -2.9114726e+01   3.5000000e+02  -3.0784566e+00   5.7971576e-01   6.8420758e-01
   2.2513676e+01  -2.9116423e+01   3.5000000e+02  -3.0223829e+00   7.2871484e-01   8.3328389e-01
   2.2660805e+01  -2.9113951e+01   3.5000000e+02  -2.9602119e+00   8.7017841e-01   9.9604305e-01
   2.2807759e+01  -2.9107313e+01   3.5000000e+02  -2.8934129e+00   1.0016457e+00   1.1711632e+00
   2.2954377e+01  -2.9096516e+01   3.5000000e+02  -2.8235509e+00   1.1208405e+00   1.3568031e+00
   2.3100500e+01  -2.9081572e+01   3.5000000e+02  -2.7522322e+00   1.2257927e+00   1.5506614e+00
   2.3245967e+01  -2.9062498e+01   3.5000000e+02  -2.6810505e+00   1.3149374e+00   1.7500580e+00
   2.3390621e+01  -2.9039314e+01   3.5000000e+02  -2.6115282e+00   1.3871958e+00   1.9520536e+00
   2.3534304e+01  -2.9012045e+01   3.5000000e+02  -2.5450658e+00   1.4420139e+00   2.1535750e+00
   2.3676862e+01  -2.8980722e+01   3.5000000e+02  -2.4828953e+00   1.4793715e+00   2.3515608e+00
   2.3818141e+01  -2.8945379e+01   3.5000000e+02  -2.4260531e+00   1.4997560e+00   2.5430783e+00
   2.3957988e+01  -2.8906054e+01   3.5000000e+02  -2.3753618e+00   1.5041071e+00   2.7254391e+00
   2.4700234e+01  -2.8764147e+01   3.5000000e+02  -2.0624759e+00   1.2102406e+00   3.6266449e+00
   2.4828699e+01  -2.8701863e+01   3.5000000e+02  -2.0536067e+00   1.1488779e+00   3.7123103e+00
   2.4954798e+01  -2.8636081e+01   3.5000000e+02  -2.0517975e+00   1.0840365e+00   3.7814516e+00
   2.5078409e+01  -2.8566866e+01   3.5000000e+02  -2.0566347e+00   1.0172949e+00   3.8342648e+00
   2.5199411e+01  -2.8494290e+01   3.5000000e+02  -2.0676651e+00   9.5009972e-01   3.8711348e+00
   2.5317689e+01  -2.8418426e+01   3.5000000e+02  -2.0844223e+00   8.8376004e-01   3.8925946e+00
   2.5433129e+01  -2.8339351e+01   3.5000000e+02  -2.1064457e+00   8.1944929e-01   3.8992903e+00
   2.5545622e+01  -2.8257145e+01   3.5000000e+02  -2.1332978e+00   7.5820267e-01   3.8919559e+00
   2.5655063e+01  -2.8171890e+01   3.5000000e+02  -2.1645817e+00   7.0091751e-01   3.8713879e+00
   2.5761351e+01  -2.8083672e+01   3.5000000e+02  -2.1999522e+00   6.4834771e-01   3.8384242e+00
   2.5864388e+01  -2.7992580e+01   3.5000000e+02  -2.2391270e+00   6.0109786e-01   3.7939190e+00
   2.5964080e+01  -2.7898703e+01   3.5000000e+02  -2.2818933e+00   5.5961436e-01   3.7387123e+00
   2.6060338e+01  -2.7802136e+01   3.5000000e+02  -2.3280968e+00   5.2417093e-01   3.6736043e+00
   2.6153076e+01  -2.7702974e+01   3.5000000e+02  -2.3776367e+00   4.9486768e-01   3.5993135e+00
   2.6242214e+01  -2.7601315e+01   3.5000000e+02  -2.4304377e+00   4.7162534e-01   3.5164461e+00
   2.6327675e+01  -2.7497260e+01   3.5000000e+02  -2.4864193e+00   4.5419542e-01   3.4254648e+00
   2.6409385e+01  -2.7390910e+01   3.5000000e+02  -2.5454585e+00   4.4217848e-01   3.3266647e+00
   2.6487277e+01  -2.7282370e+01   3.5000000e+02  -2.6073402e+00   4.3504343e-01   3.2201734e+00
   2.6561286e+01  -2.7171746e+01   3.5000000e+02  -2.6717217e+00   4.3216693e-01   3.1059569e+00
   2.6631354e+01  -2.7059144e+01   3.5000000e+02  -2.7380969e+00   4.3286658e-01   2.9838505e+00
   2.6697424e+01  -2.6944675e+01   3.5000000e+02  -2.8057753e+00   4.3644150e-01   2.8536092e+00
   2.6759446e+01  -2.6828448e+01   3.5000000e+02  -2.8738829e+00   4.4220598e-01   2.7149597e+00
   2.6817373e+01  -2.6710576e+01   3.5000000e+02  -2.9413770e+00   4.4951884e-01   2.5676706e+00
   2.6871163e+01  -2.6591172e+01   3.5000000e+02  -3.0070872e+00   4.5780452e-01   2.4116091e+00
   2.6920779e+01  -2.6470349e+01   3.5000000e+02  -3.0697690e+00   4.6656435e-01   2.2467922e+00
   2.6966186e+01  -2.6348224e+01   3.5000000e+02  -3.1281688e+00   4.7537921e-01   2.0734271e+00
   2.7007356e+01  -2.6224910e+01   3.5000000e+02  -3.1810976e+00   4.8390222e-01   1.8919172e+00
   2.7044263e+01  -2.6100527e+01   3.5000000e+02  -3.2274944e+00   4.9184540e-01   1.7028718e+00
   2.7076887e+01  -2.5975189e+01   3.5000000e+02  -3.2664916e+00   4.9896244e-01   1.5070616e+00
   2.7105211e+01  -2.5849016e+01   3.5000000e+02  -3.2974533e+00   5.0502621e-01   1.3053953e+00
   2.7129222e+01  -2.5722126e+01   3.5000000e+02  -3.3200050e+00   5.0980809e-01   1.0988525e+00
   2.7148913e+01  -2.5594636e+01   3.5000000e+02  -3.3340355e+00   5.1305511e-01   8.8842754e-01
   2.7164279e+01  -2.5466666e+01   3.5000000e+02  -3.3396804e+00   5.1447343e-01   6.7507362e-01
   2.7175320e+01  -2.5338334e+01   3.5000000e+02  -3.3372850e+00   5.1371263e-01   4.5964307e-01
   2.7182040e+01  -2.5209758e+01   3.5000000e+02  -3.3273508e+00   5.1035617e-01   2.4284848e-01
   2.7184445e+01  -2.5081057e+01   3.5000000e+02  -3.3104693e+00   5.0391808e-01   2.5236923e-02
   2.7182549e+01  -2.4952349e+01   3.5000000e+02  -3.2872497e+00   4.9384152e-01  -1.9281433e-01
   2.7176365e+01  -2.4823752e+01   3.5000000e+02  -3.2582463e+00   4.7950982e-01  -4.1108969e-01
   2.7165913e+01  -2.4695383e+01   3.5000000e+02  -3.2238926e+00   4.6025533e-01  -6.2949409e-01
   2.7151215e+01  -2.4567359e+01   3.5000000e+02  -3.1844482e+00   4.3537918e-01  -8.4800210e-01
   2.7132298e+01  -2.4439796e+01   3.5000000e+02  -3.1399660e+00   4.0417250e-01  -1.0665888e+00
   2.7109191e+01  -2.4312809e+01   3.5000000e+02  -3.0902819e+00   3.6594351e-01  -1.2851576e+00
   2.7081927e+01  -2.4186513e+01   3.5000000e+02  -3.0350314e+00   3.2004655e-01  -1.5034618e+00
   2.7050544e+01  -2.4061021e+01   3.5000000e+02  -2.9736915e+00   2.6591194e-01  -1.7210424e+00
   2.7015080e+01  -2.3936446e+01   3.5000000e+02  -2.9056411e+00   2.0307710e-01  -1.9371821e+00
   2.6975579e+01  -2.3812898e+01   3.5000000e+02  -2.8302396e+00   1.3121065e-01  -2.1508814e+00
   2.6932088e+01  -2.3690489e+01   3.5000000e+02  -2.7469096e+00   5.0136126e-02  -2.3608590e+00
   2.6884655e+01  -2.3569327e+01   3.5000000e+02  -2.6552099e+00  -4.0159632e-02  -2.5655934e+00
   2.6833334e+01  -2.3449519e+01   3.5000000e+02  -2.5549038e+00  -1.3952203e-01  -2.7633677e+00
   2.6778179e+01  -2.3331172e+01   3.5000000e+02  -2.4459998e+00  -2.4763584e-01  -2.9523421e+00
   2.6719250e+01  -2.3214390e+01   3.5000000e+02  -2.3287746e+00  -3.6404270e-01  -3.1306271e+00
   2.6656606e+01  -2.3099276e+01   3.5000000e+02  -2.2037676e+00  -4.8816367e-01  -3.2963563e+00
   2.6590313e+01  -2.2985930e+01   3.5000000e+02  -2.0717658e+00  -6.1932418e-01  -3.4477443e+00
   2.6520437e+01  -2.2874454e+01   3.5000000e+02  -1.9337693e+00  -7.5677622e-01  -3.5831322e+00
   2.6447046e+01  -2.2764942e+01   3.5000000e+02  -1.7909468e+00  -8.9972829e-01  -3.7010287e+00
   2.6370214e+01  -2.2657493e+01   3.5000000e+02  -1.6446098e+00  -1.0473457e+00  -3.8001169e+00
   2.6290014e+01  -2.2552199e+01   3.5000000e+02  -1.4961613e+00  -1.1987739e+00  -3.8792810e+00
   2.6206523e+01  -2.2449151e+01   3.5000000e+02  -1.3470745e+00  -1.3531316e+00  -3.9376096e+00
   2.6119820e+01  -2.2348440e+01   3.5000000e+02  -1.1988656e+00  -1.5095098e+00  -3.9744085e+00
   2.6029986e+01  -2.2250152e+01   3.5000000e+02  -1.0530685e+00  -1.6669729e+00  -3.9892189e+00
   2.5937105e+01  -2.2154373e+01   3.5000000e+02  -9.1121806e-01  -1.8245535e+00  -3.9818351e+00
   2.5841262e+01  -2.2061186e+01   3.5000000e+02  -7.7482508e-01  -1.9812611e+00  -3.9523274e+00
   2.5742546e+01  -2.1970670e+01   3.5000000e+02  -6.4535411e-01  -2.1360931e+00  -3.9010643e+00
   2.5641045e+01  -2.1882904e+01   3.5000000e+02  -5.2419511e-01  -2.2880575e+00  -3.8287265e+00
   2.5536852e+01  -2.1797963e+01   3.5000000e+02  -4.1263521e-01  -2.4362010e+00  -3.7363186e+00
   2.5430060e+01  -2.1715921e+01   3.5000000e+02  -3.1182409e-01  -2.5796495e+00  -3.6251606e+00
   2.5320763e+01  -2.1636847e+01   3.5000000e+02  -2.2273945e-01  -2.7176529e+00  -3.4968669e+00
   2.5209060e+01  -2.1560809e+01   3.5000000e+02  -1.4615854e-01  -2.8496233e+00  -3.3533109e+00
   2.5095048e+01  -2.1487873e+01   3.5000000e+02  -8.2624703e-02  -2.9751837e+00  -3.1965598e+00
   2.4978827e+01  -2.1418100e+01   3.5000000e+02  -3.2426479e-02  -3.0941983e+00  -3.0288018e+00
   2.4860499e+01  -2.1351551e+01   3.5000000e+02   4.4162308e-03  -3.2067924e+00  -2.8522551e+00
   2.4740167e+01  -2.1288282e+01   3.5000000e+02   2.8156902e-02  -3.3133580e+00  -2.6690628e+00
   2.4617936e+01  -2.1228348e+01   3.5000000e+02   3.9312875e-02  -3.4145361e+00  -2.4811901e+00
   2.4493910e+01  -2.1171798e+01   3.5000000e+02   3.8643988e-02  -3.5111810e+00  -2.2903174e+00
   2.4368197e+01  -2.1118682e+01   3.5000000e+02   2.7119349e-02  -3.6042984e+00  -2.0977617e+00
   2.4240904e+01  -2.1069044e+01   3.5000000e+02   5.8741571e-03  -3.6949743e+00  -1.9044006e+00
   2.4112140e+01  -2.1022927e+01   3.5000000e+02  -2.3838775e-02  -3.7842864e+00  -1.7106382e+00
   2.3982015e+01  -2.0980369e+01   3.5000000e+02  -6.0701394e-02  -3.8732137e+00  -1.5163934e+00
   2.3850640e+01  -2.0941408e+01   3.5000000e+02  -1.0337834e-01  -3.9625488e+00  -1.3211245e+00
   2.3718127e+01  -2.0906075e+01   3.5000000e+02  -1.5056371e-01  -4.0528176e+00  -1.1238803e+00
   2.3584587e+01  -2.0874402e+01   3.5000000e+02  -2.0101405e-01  -4.1442195e+00  -9.2337631e-01
   2.3450134e+01  -2.0846414e+01   3.5000000e+02  -2.5357651e-01  -4.2365780e+00  -7.1809679e-01
   2.3314881e+01  -2.0822136e+01   3.5000000e+02  -3.0720133e-01  -4.3293238e+00  -5.0639874e-01
   2.3178943e+01  -2.0801588e+01   3.5000000e+02  -3.6094813e-01  -4.4214917e+00  -2.8663044e-01
   2.3042434e+01  -2.0784787e+01   3.5000000e+02  -4.1398167e-01  -4.5117454e+00  -5.7239399e-02
   2.2905469e+01  -2.0771748e+01   3.5000000e+02  -4.6555963e-01  -4.5984190e+00   1.8311971e-01
   2.2768162e+01  -2.0762482e+01   3.5000000e+02  -5.1501884e-01  -4.6795772e+00   4.3549519e-01
   2.2630631e+01  -2.0756996e+01   3.5000000e+02  -5.6175591e-01  -4.7530863e+00   7.0055140e-01
   2.2492990e+01  -2.0755296e+01   3.5000000e+02  -6.0521013e-01  -4.8167052e+00   9.7852620e-01
   2.2355354e+01  -2.0757382e+01   3.5000000e+02  -6.4484871e-01  -4.8681732e+00   1.2691813e+00
   2.2217840e+01  -2.0763253e+01   3.5000000e+02  -6.8015039e-01  -4.9053081e+00   1.5717851e+00
   2.2080563e+01  -2.0772904e+01   3.5000000e+02  -7.1059917e-01  -4.9261035e+00   1.8851245e+00
   2.1943639e+01  -2.0786326e+01   3.5000000e+02  -7.3567841e-01  -4.9288211e+00   2.2075262e+00
   2.1807183e+01  -2.0803510e+01   3.5000000e+02  -7.5486698e-01  -4.9120766e+00   2.5369119e+00
   2.1671309e+01  -2.0824438e+01   3.5000000e+02  -7.6764754e-01  -4.8749084e+00   2.8708614e+00
   2.1536133e+01  -2.0849095e+01   3.5000000e+02  -7.7350045e-01  -4.8168358e+00   3.2066988e+00
   2.1401768e+01  -2.0877460e+01   3.5000000e+02  -7.7191657e-01  -4.7378866e+00   3.5415965e+00
   2.1268327e+01  -2.0909507e+01   3.5000000e+02  -7.6240159e-01  -4.6386028e+00   3.8726735e+00
   2.1135925e+01  -2.0945211e+01   3.5000000e+02  -7.4447587e-01  -4.5200222e+00   4.1970995e+00
   2.1004672e+01  -2.0984540e+01   3.5000000e+02  -7.1768905e-01  -4.3836191e+00   4.5122015e+00
   2.0874681e+01  -2.1027462e+01   3.5000000e+02  -6.8161966e-01  -4.2312385e+00   4.8155310e+00
   2.0746062e+01  -2.1073939e+01   3.5000000e+02  -6.3589208e-01  -4.0649948e+00   5.1049317e+00
   2.0618925e+01  -2.1123933e+01   3.5000000e+02  -5.8018271e-01  -3.8871720e+00   5.3785694e+00
   2.0493378e+01  -2.1177402e+01   3.5000000e+02  -5.1424177e-01  -3.7001152e+00   5.6349399e+00
   2.0369531e+01  -2.1234298e+01   3.5000000e+02  -4.3791714e-01  -3.5061403e+00   5.8728445e+00
   2.0247488e+01  -2.1294575e+01   3.5000000e+02  -3.5116701e-01  -3.3074412e+00   6.0913737e+00
   2.0127355e+01  -2.1358180e+01   3.5000000e+02  -2.5409557e-01  -3.1060424e+00   6.2898433e+00
   2.0009238e+01  -2.1425060e+01   3.5000000e+02  -1.4696416e-01  -2.9037606e+00   6.4677550e+00
   1.9893237e+01  -2.1495158e+01   3.5000000e+02  -3.0212705e-02  -2.7021809e+00   6.6247580e+00
   1.9779456e+01  -2.1568413e+01   3.5000000e+02   9.5532208e-02  -2.5026783e+00   6.7606020e+00
   1.9667993e+01  -2.1644763e+01   3.5000000e+02   2.2946420e-01  -2.3064201e+00   6.8751266e+00
   1.9558947e+01  -2.1724142e+01   3.5000000e+02   3.7060355e-01  -2.1144040e+00   6.9682402e+00
   1.9452415e+01  -2.1806483e+01   3.5000000e+02   5.1782288e-01  -1.9274833e+00   7.0399216e+00
   1.9348492e+01  -2.1891715e+01   3.5000000e+02   6.6986905e-01  -1.7463952e+00   7.0902233e+00
   1.9247271e+01  -2.1979765e+01   3.5000000e+02   8.2539796e-01  -1.5717863e+00   7.1192798e+00
   1.9148843e+01  -2.2070556e+01   3.5000000e+02   9.8300350e-01  -1.4042331e+00   7.1273165e+00
   1.9053298e+01  -2.2164012e+01   3.5000000e+02   1.1412576e+00  -1.2442596e+00   7.1146548e+00
   1.8960724e+01  -2.2260050e+01   3.5000000e+02   1.2987238e+00  -1.0923472e+00   7.0817220e+00
   1.8871205e+01  -2.2358588e+01   3.5000000e+02   1.4539947e+00  -9.4893978e-01   7.0290509e+00
   1.8784825e+01  -2.2459542e+01   3.5000000e+02   1.6057053e+00  -8.1445687e-01   6.9572806e+00
   1.8701666e+01  -2.2562822e+01   3.5000000e+02   1.7525412e+00  -6.8929336e-01   6.8671607e+00
   1.8621805e+01  -2.2668340e+01   3.5000000e+02   1.8932619e+00  -5.7381785e-01   6.7595432e+00
   1.8545320e+01  -2.2776004e+01   3.5000000e+02   2.0267014e+00  -4.6838226e-01   6.6353843e+00
   1.8472284e+01  -2.2885720e+01   3.5000000e+02   2.1517791e+00  -3.7330938e-01   6.4957399e+00
   1.8402770e+01  -2.2997391e+01   3.5000000e+02   2.2675072e+00  -2.8889593e-01   6.3417606e+00
   1.8336845e+01  -2.3110921e+01   3.5000000e+02   2.3730022e+00  -2.1539495e-01   6.1746780e+00
   1.8274577e+01  -2.3226210e+01   3.5000000e+02   2.4674881e+00  -1.5301518e-01   5.9957985e+00
   1.8216029e+01  -2.3343157e+01   3.5000000e+02   2.5503040e+00  -1.0189774e-01   5.8064828e+00
   1.8161262e+01  -2.3461657e+01   3.5000000e+02   2.6209052e+00  -6.2105286e-02   5.6081303e+00
   1.8110335e+01  -2.3581608e+01   3.5000000e+02   2.6788678e+00  -3.3611297e-02   5.4021443e+00
   1.8063301e+01  -2.3702902e+01   3.5000000e+02   2.7238730e+00  -1.6276199e-02   5.1899246e+00
   1.8020214e+01  -2.3825432e+01   3.5000000e+02   2.7557060e+00  -9.8553278e-03   4.9728339e+00
   1.7981122e+01  -2.3949089e+01   3.5000000e+02   2.7742364e+00  -1.3981235e-02   4.7521873e+00
   1.7946072e+01  -2.4073763e+01   3.5000000e+02   2.7794068e+00  -2.8175524e-02   4.5292411e+00
   1.7915107e+01  -2.4199342e+01   3.5000000e+02   2.7712195e+00  -5.1850431e-02   4.3051933e+00
   1.7888265e+01  -2.4325714e+01   3.5000000e+02   2.7497281e+00  -8.4320882e-02   4.0811855e+00
   1.7865583e+01  -2.4452765e+01   3.5000000e+02   2.7150408e+00  -1.2482706e-01   3.8583154e+00
   1.7847095e+01  -2.4580380e+01   3.5000000e+02   2.6673264e+00  -1.7255044e-01   3.6376465e+00
   1.7832828e+01  -2.4708444e+01   3.5000000e+02   2.6068271e+00  -2.2662737e-01   3.4202159e+00
   1.7822810e+01  -2.4836842e+01   3.5000000e+02   2.5338821e+00  -2.8618395e-01   3.2070351e+00
   1.7817062e+01  -2.4965456e+01   3.5000000e+02   2.4489453e+00  -3.5033894e-01   2.9990921e+00
   1.7815603e+01  -2.5094168e+01   3.5000000e+02   2.3526044e+00  -4.1823246e-01   2.7973303e+00
   1.7818447e+01  -2.5222862e+01   3.5000000e+02   2.2455875e+00  -4.8903700e-01   2.6026243e+00
   1.7825607e+01  -2.5351418e+01   3.5000000e+02   2.1287698e+00  -5.6197424e-01   2.4157601e+00
   1.7837088e+01  -2.5479719e+01   3.5000000e+02   2.0031531e+00  -6.3631597e-01   2.2373976e+00
   1.7852895e+01  -2.5607646e+01   3.5000000e+02   1.8698497e+00  -7.1140198e-01   2.0680460e+00
   1.7873026e+01  -2.5735080e+01   3.5000000e+02   1.7300438e+00  -7.8663109e-01   1.9080405e+00
   1.7897477e+01  -2.5861902e+01   3.5000000e+02   1.5849495e+00  -8.6146763e-01   1.7575249e+00
   1.7926240e+01  -2.5987996e+01   3.5000000e+02   1.4357588e+00  -9.3543196e-01   1.6164445e+00
   1.7959301e+01  -2.6113241e+01   3.5000000e+02   1.2836004e+00  -1.0080847e+00   1.4845626e+00
   1.7996643e+01  -2.6237521e+01   3.5000000e+02   1.1294807e+00  -1.0790199e+00   1.3614671e+00
   1.8038245e+01  -2.6360719e+01   3.5000000e+02   9.7424879e-01  -1.1478466e+00   1.2466074e+00
   1.8084083e+01  -2.6482717e+01   3.5000000e+02   8.1856409e-01  -1.2141746e+00   1.1393327e+00
   1.8134125e+01  -2.6603401e+01   3.5000000e+02   6.6287080e-01  -1.2775942e+00   1.0389414e+00
   1.8188338e+01  -2.6722654e+01   3.5000000e+02   5.0740231e-01  -1.3376774e+00   9.4472934e-01
   1.8246685e+01  -2.6840364e+01   3.5000000e+02   3.5218293e-01  -1.3939690e+00   8.5604028e-01
   1.8309121e+01  -2.6956416e+01   3.5000000e+02   1.9706724e-01  -1.4459865e+00   7.7231925e-01
   1.8375601e+01  -2.7070700e+01   3.5000000e+02   4.1771751e-02  -1.4932391e+00   6.9313997e-01
   1.8446073e+01  -2.7183105e+01   3.5000000e+02  -1.1406170e-01  -1.5352359e+00   6.1823852e-01
   1.8520480e+01  -2.7293523e+01   3.5000000e+02  -2.7080899e-01  -1.5715091e+00   5.4752105e-01
   1.8598764e+01  -2.7401844e+01   3.5000000e+02  -4.2879544e-01  -1.6016427e+00   4.8105245e-01
   1.8680860e+01  -2.7507965e+01   3.5000000e+02  -5.8824352e-01  -1.6252852e+00   4.1904246e-01
   1.8766698e+01  -2.7611781e+01   3.5000000e+02  -7.4921098e-01  -1.6421753e+00   3.6180586e-01
   1.8856206e+01  -2.7713190e+01   3.5000000e+02  -9.1155994e-01  -1.6521565e+00   3.0971331e-01
   1.8949307e+01  -2.7812092e+01   3.5000000e+02  -1.0749328e+00  -1.6551804e+00   2.6314207e-01
   1.9045919e+01  -2.7908389e+01   3.5000000e+02  -1.2387490e+00  -1.6513040e+00   2.2242299e-01
   1.9145956e+01  -2.8001987e+01   3.5000000e+02  -1.4022239e+00  -1.6406763e+00   1.8779319e-01
   1.9249328e+01  -2.8092791e+01   3.5000000e+02  -1.5643953e+00  -1.6235205e+00   1.5935453e-01
   1.9355941e+01  -2.8180711e+01   3.5000000e+02  -1.7241755e+00  -1.6001007e+00   1.3705599e-01
   1.9465698e+01  -2.8265659e+01   3.5000000e+02  -1.8804019e+00  -1.5706909e+00   1.2068526e-01
   1.9578496e+01  -2.8347550e+01   3.5000000e+02  -2.0318915e+00  -1.5355393e+00   1.0988653e-01
   1.9694230e+01  -2.8426301e+01   3.5000000e+02  -2.1774956e+00  -1.4948388e+00   1.0418532e-01
   1.9812791e+01  -2.8501834e+01   3.5000000e+02  -2.3161446e+00  -1.4486982e+00   1.0303951e-01
   1.9934064e+01  -2.8574071e+01   3.5000000e+02  -2.4468760e+00  -1.3971298e+00   1.0588730e-01
   2.0057933e+01  -2.8642939e+01   3.5000000e+02  -2.5688617e+00  -1.3400401e+00   1.1220675e-01
   2.0184280e+01  -2.8708368e+01   3.5000000e+02  -2.6814113e+00  -1.2772360e+00   1.2156923e-01
   2.0312979e+01  -2.8770292e+01   3.5000000e+02  -2.7839646e+00  -1.2084413e+00   1.3369468e-01
   2.0443904e+01  -2.8828647e+01   3.5000000e+02  -2.8760815e+00  -1.1333228e+00   1.4847779e-01
   2.0576927e+01  -2.8883373e+01   3.5000000e+02  -2.9574231e+00  -1.0515203e+00   1.6601889e-01
   2.0711915e+01  -2.8934415e+01   3.5000000e+02  -3.0277299e+00  -9.6268475e-01   1.8664052e-01
   2.0848732e+01  -2.8981720e+01   3.5000000e+02  -3.0868046e+00  -8.6651932e-01   2.1087875e-01
   2.0987242e+01  -2.9025238e+01   3.5000000e+02  -3.1345009e+00  -7.6281769e-01   2.3947211e-01
   2.1127305e+01  -2.9064927e+01   3.5000000e+02  -3.1707157e+00  -6.5150652e-01   2.7335458e-01
   2.1268778e+01  -2.9100743e+01   3.5000000e+02  -3.1953916e+00  -5.3268995e-01   3.1360188e-01
   2.1411518e+01  -2.9132651e+01   3.5000000e+02  -3.2085277e+00  -4.0668471e-01   3.6141669e-01
   2.1555379e+01  -2.9160617e+01   3.5000000e+02  -3.2101959e+00  -2.7406216e-01   4.1806290e-01
   2.1700213e+01  -2.9184612e+01   3.5000000e+02  -3.2005644e+00  -1.3567927e-01   4.8481504e-01
   2.1845873e+01  -2.9204611e+01   3.5000000e+02  -3.1799234e+00   7.3011672e-03   5.6288666e-01
   2.1992207e+01  -2.9220594e+01   3.5000000e+02  -3.1487114e+00   1.5339574e-01   6.5335211e-01
   2.2139067e+01  -2.9232544e+01   3.5000000e+02  -3.1075386e+00   3.0082021e-01   7.5705871e-01
   2.2286299e+01  -2.9240449e+01   3.5000000e+02  -3.0572043e+00   4.4751269e-01   8.7454070e-01
   2.2433751e+01  -2.9244300e+01   3.5000000e+02  -2.9987039e+00   5.9120122e-01   1.0059380e+00
   2.2581273e+01  -2.9244093e+01   3.5000000e+02  -2.9332220e+00   7.2948567e-01   1.1509376e+00
   2.2728710e+01  -2.9239829e+01   3.5000000e+02  -2.8621162e+00   8.5993335e-01   1.3087241e+00
   2.2875911e+01  -2.9231512e+01   3.5000000e+02  -2.7868820e+00   9.8020369e-01   1.4779736e+00
   2.3022724e+01  -2.9219151e+01   3.5000000e+02  -2.7091087e+00   1.0881603e+00   1.6568743e+00
   2.3168997e+01  -2.9202758e+01   3.5000000e+02  -2.6304268e+00   1.1819834e+00   1.8431810e+00
   2.3314579e+01  -2.9182350e+01   3.5000000e+02  -2.5524480e+00   1.2602620e+00   2.0343070e+00
   2.3459321e+01  -2.9157949e+01   3.5000000e+02  -2.4767062e+00   1.3220595e+00   2.2274366e+00
   2.3603074e+01  -2.9129581e+01   3.5000000e+02  -2.4046068e+00   1.3669481e+00   2.4196458e+00
   2.3745692e+01  -2.9097273e+01   3.5000000e+02  -2.3373844e+00   1.3950123e+00   2.6080320e+00
   2.3887028e+01  -2.9061061e+01   3.5000000e+02  -2.2760673e+00   1.4068121e+00   2.7898375e+00
   2.4026939e+01  -2.9020980e+01   3.5000000e+02  -2.2214661e+00   1.4033321e+00   2.9625491e+00
   2.4165283e+01  -2.8977074e+01   3.5000000e+02  -2.1741627e+00   1.3858969e+00   3.1239828e+00
   2.4301920e+01  -2.8929386e+01   3.5000000e+02  -2.1345276e+00   1.3560904e+00   3.2723255e+00
   2.4436714e+01  -2.8877967e+01   3.5000000e+02  -2.1027277e+00   1.3156581e+00   3.4061686e+00
   2.4569529e+01  -2.8822868e+01   3.5000000e+02  -2.0787613e+00   1.2664299e+00   3.5244905e+00
   2.5284045e+01  -2.8598997e+01   3.5000000e+02  -1.8983919e+00   7.9807251e-01   4.0223486e+00
   2.5402001e+01  -2.8523370e+01   3.5000000e+02  -1.9158041e+00   7.3042582e-01   4.0390208e+00
   2.5517216e+01  -2.8444644e+01   3.5000000e+02  -1.9385275e+00   6.6510725e-01   4.0419888e+00
   2.5629585e+01  -2.8362894e+01   3.5000000e+02  -1.9661002e+00   6.0311407e-01   4.0319733e+00
   2.5739012e+01  -2.8278198e+01   3.5000000e+02  -1.9981001e+00   5.4531551e-01   4.0097641e+00
   2.5845402e+01  -2.8190634e+01   3.5000000e+02  -2.0341693e+00   4.9245722e-01   3.9761930e+00
   2.5948661e+01  -2.8100286e+01   3.5000000e+02  -2.0740186e+00   4.4514792e-01   3.9321188e+00
   2.6048704e+01  -2.8007237e+01   3.5000000e+02  -2.1174385e+00   4.0384352e-01   3.8783968e+00
   2.6145445e+01  -2.7911575e+01   3.5000000e+02  -2.1642979e+00   3.6884093e-01   3.8158480e+00
   2.6238805e+01  -2.7813389e+01   3.5000000e+02  -2.2145350e+00   3.4026242e-01   3.7452212e+00
   2.6328707e+01  -2.7712769e+01   3.5000000e+02  -2.2681407e+00   3.1805609e-01   3.6671518e+00
   2.6415077e+01  -2.7609809e+01   3.5000000e+02  -2.3251237e+00   3.0199638e-01   3.5821284e+00
   2.6497849e+01  -2.7504604e+01   3.5000000e+02  -2.3854715e+00   2.9169445e-01   3.4904630e+00
   2.6576956e+01  -2.7397250e+01   3.5000000e+02  -2.4491089e+00   2.8662954e-01   3.3922730e+00
   2.6652337e+01  -2.7287846e+01   3.5000000e+02  -2.5158450e+00   2.8617250e-01   3.2874877e+00
   2.6723936e+01  -2.7176491e+01   3.5000000e+02  -2.5853343e+00   2.8962581e-01   3.1758675e+00
   2.6791700e+01  -2.7063287e+01   3.5000000e+02  -2.6570432e+00   2.9626291e-01   3.0570480e+00
   2.6855579e+01  -2.6948337e+01   3.5000000e+02  -2.7302370e+00   3.0536714e-01   2.9305949e+00
   2.6915529e+01  -2.6831743e+01   3.5000000e+02  -2.8039845e+00   3.1626293e-01   2.7960698e+00
   2.6971508e+01  -2.6713612e+01   3.5000000e+02  -2.8771803e+00   3.2834101e-01   2.6531052e+00
   2.7023479e+01  -2.6594048e+01   3.5000000e+02  -2.9485953e+00   3.4107567e-01   2.5014591e+00
   2.7071409e+01  -2.6473160e+01   3.5000000e+02  -3.0169315e+00   3.5402781e-01   2.3410763e+00
   2.7115268e+01  -2.6351054e+01   3.5000000e+02  -3.0808988e+00   3.6684603e-01   2.1721090e+00
   2.7155030e+01  -2.6227838e+01   3.5000000e+02  -3.1392842e+00   3.7925261e-01   1.9949357e+00
   2.7190675e+01  -2.6103623e+01   3.5000000e+02  -3.1910204e+00   3.9102514e-01   1.8101538e+00
   2.7222184e+01  -2.5978518e+01   3.5000000e+02  -3.2352488e+00   4.0198068e-01   1.6185378e+00
   2.7249543e+01  -2.5852632e+01   3.5000000e+02  -3.2713593e+00   4.1194904e-01   1.4209974e+00
   2.7272741e+01  -2.5726075e+01   3.5000000e+02  -3.2990137e+00   4.2075102e-01   1.2185194e+00
   2.7291773e+01  -2.5598959e+01   3.5000000e+02  -3.3181468e+00   4.2817518e-01   1.0121085e+00
   2.7306634e+01  -2.5471393e+01   3.5000000e+02  -3.3289492e+00   4.3396446e-01   8.0271052e-01
   2.7317326e+01  -2.5343488e+01   3.5000000e+02  -3.3318251e+00   4.3779735e-01   5.9117117e-01
   2.7323852e+01  -2.5215355e+01   3.5000000e+02  -3.3273381e+00   4.3928339e-01   3.7818336e-01
   2.7326221e+01  -2.5087105e+01   3.5000000e+02  -3.3161430e+00   4.3795733e-01   1.6426395e-01
   2.7324443e+01  -2.4958846e+01   3.5000000e+02  -3.2989108e+00   4.3328416e-01  -5.0263695e-02
   2.7318532e+01  -2.4830689e+01   3.5000000e+02  -3.2762542e+00   4.2466527e-01  -2.6524424e-01
   2.7308508e+01  -2.4702744e+01   3.5000000e+02  -3.2486591e+00   4.1145063e-01  -4.8066139e-01
   2.7294390e+01  -2.4575119e+01   3.5000000e+02  -3.2164269e+00   3.9295865e-01  -6.9659325e-01
   2.7276203e+01  -2.4447922e+01   3.5000000e+02  -3.1796375e+00   3.6849472e-01  -9.1313485e-01
   2.7253974e+01  -2.4321261e+01   3.5000000e+02  -3.1381341e+00   3.3737771e-01  -1.1303254e+00
   2.7227735e+01  -2.4195243e+01   3.5000000e+02  -3.0915342e+00   2.9896631e-01  -1.3480693e+00
   2.7197519e+01  -2.4069973e+01   3.5000000e+02  -3.0392650e+00   2.5268832e-01  -1.5660707e+00
   2.7163362e+01  -2.3945558e+01   3.5000000e+02  -2.9806243e+00   1.9806993e-01  -1.7837707e+00
   2.7125304e+01  -2.3822100e+01   3.5000000e+02  -2.9148544e+00   1.3475834e-01  -2.0003251e+00
   2.7083388e+01  -2.3699702e+01   3.5000000e+02  -2.8412287e+00   6.2545406e-02  -2.2145907e+00
   2.7037658e+01  -2.3578467e+01   3.5000000e+02  -2.7591331e+00  -1.8619029e-02  -2.4251519e+00
   2.6988164e+01  -2.3458495e+01   3.5000000e+02  -2.6681408e+00  -1.0862437e-01  -2.6303673e+00
   2.6934955e+01  -2.3339886e+01   3.5000000e+02  -2.5680632e+00  -2.0720289e-01  -2.8284372e+00
   2.6878085e+01  -2.3222737e+01   3.5000000e+02  -2.4589850e+00  -3.1394601e-01  -3.0174766e+00
   2.6817610e+01  -2.3107144e+01   3.5000000e+02  -2.3412710e+00  -4.2832481e-01  -3.1955895e+00
   2.6753589e+01  -2.2993204e+01   3.5000000e+02  -2.2155562e+00  -5.4971405e-01  -3.3609320e+00
   2.6686081e+01  -2.2881009e+01   3.5000000e+02  -2.0827117e+00  -6.7742537e-01  -3.5117741e+00
   2.6615151e+01  -2.2770651e+01   3.5000000e+02  -1.9438149e+00  -8.1072512e-01  -3.6465281e+00
   2.6540863e+01  -2.2662220e+01   3.5000000e+02  -1.8001020e+00  -9.4885708e-01  -3.7637777e+00
   2.6463287e+01  -2.2555805e+01   3.5000000e+02  -1.6529347e+00  -1.0910495e+00  -3.8622875e+00
   2.6382491e+01  -2.2451492e+01   3.5000000e+02  -1.5037577e+00  -1.2365244e+00  -3.9410147e+00
   2.6298547e+01  -2.2349366e+01   3.5000000e+02  -1.3540755e+00  -1.3844892e+00  -3.9991119e+00
   2.6211531e+01  -2.2249510e+01   3.5000000e+02  -1.2054269e+00  -1.5341305e+00  -4.0359396e+00
   2.6121518e+01  -2.2152005e+01   3.5000000e+02  -1.0593599e+00  -1.6846096e+00  -4.0510794e+00
   2.6028587e+01  -2.2056929e+01   3.5000000e+02  -9.1741405e-01  -1.8350544e+00  -4.0443546e+00
   2.5932816e+01  -2.1964359e+01   3.5000000e+02  -7.8109695e-01  -1.9845627e+00  -4.0158497e+00
   2.5834289e+01  -2.1874369e+01   3.5000000e+02  -6.5186507e-01  -2.1322072e+00  -3.9659366e+00
   2.5733089e+01  -2.1787033e+01   3.5000000e+02  -5.3109384e-01  -2.2770571e+00  -3.8952885e+00
   2.5629301e+01  -2.1702420e+01   3.5000000e+02  -4.2004797e-01  -2.4182083e+00  -3.8048921e+00
   2.5523013e+01  -2.1620598e+01   3.5000000e+02  -3.1985351e-01  -2.5548154e+00  -3.6960459e+00
   2.5414312e+01  -2.1541632e+01   3.5000000e+02  -2.3146275e-01  -2.6861396e+00  -3.5703397e+00
   2.5303289e+01  -2.1465587e+01   3.5000000e+02  -1.5562766e-01  -2.8115874e+00  -3.4296252e+00
   2.5190035e+01  -2.1392522e+01   3.5000000e+02  -9.2867945e-02  -2.9307610e+00  -3.2759580e+00
   2.5074643e+01  -2.1322496e+01   3.5000000e+02  -4.3452930e-02  -3.0434900e+00  -3.1115300e+00
   2.4957208e+01  -2.1255564e+01   3.5000000e+02  -7.3865494e-03  -3.1498589e+00  -2.9385819e+00
   2.4837825e+01  -2.1191781e+01   3.5000000e+02   1.5595491e-02  -3.2502176e+00  -2.7593042e+00
   2.4716590e+01  -2.1131197e+01   3.5000000e+02   2.6017190e-02  -3.3451723e+00  -2.5757336e+00
   2.4593602e+01  -2.1073860e+01   3.5000000e+02   2.4640422e-02  -3.4355538e+00  -2.3896549e+00
   2.4468959e+01  -2.1019816e+01   3.5000000e+02   1.2432505e-02  -3.5223706e+00  -2.2025053e+00
   2.4342761e+01  -2.0969108e+01   3.5000000e+02  -9.4767851e-03  -3.6067385e+00  -2.0153050e+00
   2.4215110e+01  -2.0921775e+01   3.5000000e+02  -3.9844703e-02  -3.6898001e+00  -1.8286079e+00
   2.4086107e+01  -2.0877856e+01   3.5000000e+02  -7.7367056e-02  -3.7726398e+00  -1.6424796e+00
   2.3955855e+01  -2.0837385e+01   3.5000000e+02  -1.2072987e-01  -3.8561927e+00  -1.4565109e+00
   2.3824456e+01  -2.0800394e+01   3.5000000e+02  -1.6865477e-01  -3.9411662e+00  -1.2698543e+00
   2.3692016e+01  -2.0766913e+01   3.5000000e+02  -2.1993478e-01  -4.0279675e+00  -1.0812978e+00
   2.3558639e+01  -2.0736969e+01   3.5000000e+02  -2.7346307e-01  -4.1166566e+00  -8.8934293e-01
   2.3424429e+01  -2.0710584e+01   3.5000000e+02  -3.2824927e-01  -4.2069110e+00  -6.9230929e-01
   2.3289494e+01  -2.0687779e+01   3.5000000e+02  -3.8342126e-01  -4.2980146e+00  -4.8844900e-01
   2.3153938e+01  -2.0668574e+01   3.5000000e+02  -4.3822305e-01  -4.3888726e+00  -2.7604413e-01
   2.3017869e+01  -2.0652982e+01   3.5000000e+02  -4.9200288e-01  -4.4780337e+00  -5.3525762e-02
   2.2881394e+01  -2.0641017e+01   3.5000000e+02  -5.4419353e-01  -4.5637435e+00   1.8043936e-01
   2.2744620e+01  -2.0632688e+01   3.5000000e+02  -5.9429457e-01  -4.6440039e+00   4.2686261e-01
   2.2607654e+01  -2.0628000e+01   3.5000000e+02  -6.4185090e-01  -4.7166466e+00   6.8636600e-01
   2.2470603e+01  -2.0626959e+01   3.5000000e+02  -6.8643056e-01  -4.7794187e+00   9.5913487e-01
   2.2333575e+01  -2.0629565e+01   3.5000000e+02  -7.2761129e-01  -4.8300678e+00   1.2448819e+00
   2.2196678e+01  -2.0635815e+01   3.5000000e+02  -7.6496665e-01  -4.8664360e+00   1.5428390e+00
   2.2060019e+01  -2.0645705e+01   3.5000000e+02  -7.9805701e-01  -4.8865517e+00   1.8517704e+00
   2.1923705e+01  -2.0659227e+01   3.5000000e+02  -8.2642698e-01  -4.8887150e+00   2.1699984e+00
   2.1787844e+01  -2.0676371e+01   3.5000000e+02  -8.4960399e-01  -4.8715788e+00   2.4954517e+00
   2.1652541e+01  -2.0697122e+01   3.5000000e+02  -8.6710403e-01  -4.8342140e+00   2.8257402e+00
   2.1517904e+01  -2.0721465e+01   3.5000000e+02  -8.7843151e-01  -4.7761626e+00   3.1582292e+00
   2.1384039e+01  -2.0749379e+01   3.5000000e+02  -8.8308966e-01  -4.6974649e+00   3.4901425e+00
   2.1251050e+01  -2.0780844e+01   3.5000000e+02  -8.8058041e-01  -4.5986639e+00   3.8186707e+00
   2.1119044e+01  -2.0815834e+01   3.5000000e+02  -8.7041329e-01  -4.4807851e+00   4.1410575e+00
   2.0988125e+01  -2.0854321e+01   3.5000000e+02  -8.5210821e-01  -4.3452833e+00   4.4547117e+00
   2.0858395e+01  -2.0896275e+01   3.5000000e+02  -8.2520026e-01  -4.1939676e+00   4.7572834e+00
   2.0729960e+01  -2.0941663e+01   3.5000000e+02  -7.8924749e-01  -4.0289162e+00   5.0467091e+00
   2.0602920e+01  -2.0990449e+01   3.5000000e+02  -7.4384316e-01  -3.8523603e+00   5.3212638e+00
   2.0477377e+01  -2.1042593e+01   3.5000000e+02  -6.8863177e-01  -3.6665885e+00   5.5795482e+00
   2.0353432e+01  -2.1098055e+01   3.5000000e+02  -6.2332518e-01  -3.4738463e+00   5.8204786e+00
   2.0231184e+01  -2.1156791e+01   3.5000000e+02  -5.4773147e-01  -3.2762527e+00   6.0432459e+00
   2.0110731e+01  -2.1218753e+01   3.5000000e+02  -4.6178189e-01  -3.0757419e+00   6.2472634e+00
   1.9992172e+01  -2.1283893e+01   3.5000000e+02  -3.6555136e-01  -2.8740318e+00   6.4321134e+00
   1.9875602e+01  -2.1352159e+01   3.5000000e+02  -2.5928587e-01  -2.6726039e+00   6.5975009e+00
   1.9761115e+01  -2.1423495e+01   3.5000000e+02  -1.4341813e-01  -2.4727162e+00   6.7432104e+00
   1.9648807e+01  -2.1497846e+01   3.5000000e+02  -1.8565756e-02  -2.2754323e+00   6.8690781e+00
   1.9538769e+01  -2.1575152e+01   3.5000000e+02   1.1446405e-01  -2.0816403e+00   6.9749831e+00
   1.9431092e+01  -2.1655351e+01   3.5000000e+02   2.5469362e-01  -1.8920967e+00   7.0608421e+00
   1.9325865e+01  -2.1738378e+01   3.5000000e+02   4.0099656e-01  -1.7074560e+00   7.1266179e+00
   1.9223177e+01  -2.1824168e+01   3.5000000e+02   5.5213246e-01  -1.5283023e+00   7.1723294e+00
   1.9123113e+01  -2.1912651e+01   3.5000000e+02   7.0677116e-01  -1.3551649e+00   7.1980670e+00
   1.9025759e+01  -2.2003757e+01   3.5000000e+02   8.6353429e-01  -1.1885429e+00   7.2040015e+00
   1.8931196e+01  -2.2097411e+01   3.5000000e+02   1.0210174e+00  -1.0289057e+00   7.1903962e+00
   1.8839507e+01  -2.2193539e+01   3.5000000e+02   1.1778271e+00  -8.7671185e-01   7.1576081e+00
   1.8750770e+01  -2.2292062e+01   3.5000000e+02   1.3325922e+00  -7.3240068e-01   7.1060952e+00
   1.8665063e+01  -2.2392902e+01   3.5000000e+02   1.4839912e+00  -5.9640333e-01   7.0364122e+00
   1.8582461e+01  -2.2495976e+01   3.5000000e+02   1.6307542e+00  -4.6913805e-01   6.9492149e+00
   1.8503037e+01  -2.2601201e+01   3.5000000e+02   1.7716814e+00  -3.5101222e-01   6.8452552e+00
   1.8426863e+01  -2.2708492e+01   3.5000000e+02   1.9056475e+00  -2.4242211e-01   6.7253821e+00
   1.8354007e+01  -2.2817760e+01   3.5000000e+02   2.0316064e+00  -1.4374322e-01   6.5905421e+00
   1.8284537e+01  -2.2928917e+01   3.5000000e+02   2.1486072e+00  -5.5331878e-02   6.4417715e+00
   1.8218518e+01  -2.3041873e+01   3.5000000e+02   2.2557970e+00   2.2490071e-02   6.2801935e+00
   1.8156010e+01  -2.3156533e+01   3.5000000e+02   2.3524261e+00   8.9452675e-02   6.1070143e+00
   1.8097074e+01  -2.3272805e+01   3.5000000e+02   2.4378653e+00   1.4533898e-01   5.9234977e+00
   1.8041768e+01  -2.3390593e+01   3.5000000e+02   2.5116018e+00   1.9001048e-01   5.7309569e+00
   1.7990146e+01  -2.3509799e+01   3.5000000e+02   2.5732404e+00   2.2342388e-01   5.5307302e+00
   1.7942261e+01  -2.3630324e+01   3.5000000e+02   2.6225007e+00   2.4563857e-01   5.3241565e+00
   1.7898162e+01  -2.3752070e+01   3.5000000e+02   2.6592054e+00   2.5683043e-01   5.1125489e+00
   1.7857895e+01  -2.3874935e+01   3.5000000e+02   2.6832624e+00   2.5729754e-01   4.8971853e+00
   1.7821506e+01  -2.3998817e+01   3.5000000e+02   2.6946519e+00   2.4745161e-01   4.6792894e+00
   1.7789035e+01  -2.4123612e+01   3.5000000e+02   2.6934056e+00   2.2782350e-01   4.4600300e+00
   1.7760520e+01  -2.4249215e+01   3.5000000e+02   2.6795970e+00   1.9904356e-01   4.2405218e+00
   1.7735997e+01  -2.4375522e+01   3.5000000e+02   2.6533351e+00   1.6182445e-01   4.0218308e+00
   1.7715499e+01  -2.4502426e+01   3.5000000e+02   2.6147669e+00   1.1694685e-01   3.8049929e+00
   1.7699054e+01  -2.4629820e+01   3.5000000e+02   2.5640869e+00   6.5241008e-02   3.5910195e+00
   1.7686689e+01  -2.4757596e+01   3.5000000e+02   2.5015573e+00   7.5597478e-03   3.3809047e+00
   1.7678427e+01  -2.4885645e+01   3.5000000e+02   2.4275274e+00  -5.5235766e-02   3.1756243e+00
   1.7674288e+01  -2.5013859e+01   3.5000000e+02   2.3424547e+00  -1.2229719e-01   2.9761225e+00
   1.7674287e+01  -2.5142128e+01   3.5000000e+02   2.2469208e+00  -1.9279981e-01   2.7832983e+00
   1.7678438e+01  -2.5270341e+01   3.5000000e+02   2.1416426e+00  -2.6596432e-01   2.5979769e+00
   1.7686750e+01  -2.5398390e+01   3.5000000e+02   2.0274640e+00  -3.4106284e-01   2.4208761e+00
   1.7699230e+01  -2.5526163e+01   3.5000000e+02   1.9053498e+00  -4.1742874e-01   2.2525853e+00
   1.7715881e+01  -2.5653549e+01   3.5000000e+02   1.7763563e+00  -4.9446026e-01   2.0935327e+00
   1.7736700e+01  -2.5780439e+01   3.5000000e+02   1.6415953e+00  -5.7161777e-01   1.9439657e+00
   1.7761684e+01  -2.5906722e+01   3.5000000e+02   1.5021991e+00  -6.4842842e-01   1.8039419e+00
   1.7790825e+01  -2.6032286e+01   3.5000000e+02   1.3592740e+00  -7.2446991e-01   1.6733284e+00
   1.7824110e+01  -2.6157023e+01   3.5000000e+02   1.2138482e+00  -7.9935937e-01   1.5518091e+00
   1.7861523e+01  -2.6280823e+01   3.5000000e+02   1.0668367e+00  -8.7273968e-01   1.4389101e+00
   1.7903046e+01  -2.6403575e+01   3.5000000e+02   9.1900276e-01  -9.4426474e-01   1.3340295e+00
   1.7948655e+01  -2.6525172e+01   3.5000000e+02   7.7092238e-01  -1.0135773e+00   1.2364776e+00
   1.7998322e+01  -2.6645506e+01   3.5000000e+02   6.2297406e-01  -1.0802979e+00   1.1455264e+00
   1.8052016e+01  -2.6764468e+01   3.5000000e+02   4.7533495e-01  -1.1440183e+00   1.0604578e+00
   1.8109704e+01  -2.6881953e+01   3.5000000e+02   3.2798568e-01  -1.2042990e+00   9.8061043e-01
   1.8171344e+01  -2.6997854e+01   3.5000000e+02   1.8074474e-01  -1.2606653e+00   9.0543246e-01
   1.8236896e+01  -2.7112068e+01   3.5000000e+02   3.3299200e-02  -1.3126324e+00   8.3450623e-01
   1.8306311e+01  -2.7224492e+01   3.5000000e+02  -1.1473789e-01  -1.3597091e+00   7.6758319e-01
   1.8379539e+01  -2.7335022e+01   3.5000000e+02  -2.6377047e-01  -1.4014311e+00   7.0458494e-01
   1.8456526e+01  -2.7443559e+01   3.5000000e+02  -4.1416529e-01  -1.4373791e+00   6.4559969e-01
   1.8537213e+01  -2.7550003e+01   3.5000000e+02  -5.6618675e-01  -1.4672035e+00   5.9086086e-01
   1.8621536e+01  -2.7654256e+01   3.5000000e+02  -7.1994932e-01  -1.4906445e+00   5.4071128e-01
   1.8709430e+01  -2.7756224e+01   3.5000000e+02  -8.7538283e-01  -1.5075495e+00   4.9555348e-01
   1.8800824e+01  -2.7855811e+01   3.5000000e+02  -1.0322000e+00  -1.5178784e+00   4.5579936e-01
   1.8895644e+01  -2.7952925e+01   3.5000000e+02  -1.1898979e+00  -1.5217021e+00   4.2181508e-01
   1.8993812e+01  -2.8047477e+01   3.5000000e+02  -1.3477675e+00  -1.5191901e+00   3.9387204e-01
   1.9095245e+01  -2.8139378e+01   3.5000000e+02  -1.5049180e+00  -1.5105918e+00   3.7210462e-01
   1.9199858e+01  -2.8228542e+01   3.5000000e+02  -1.6603219e+00  -1.4962097e+00   3.5648160e-01
   1.9307562e+01  -2.8314886e+01   3.5000000e+02  -1.8128649e+00  -1.4763643e+00   3.4679801e-01
   1.9418263e+01  -2.8398328e+01   3.5000000e+02  -1.9613965e+00  -1.4513617e+00   3.4268107e-01
   1.9531865e+01  -2.8478790e+01   3.5000000e+02  -2.1047879e+00  -1.4214590e+00   3.4361530e-01
   1.9648269e+01  -2.8556195e+01   3.5000000e+02  -2.2419755e+00  -1.3868378e+00   3.4897929e-01
   1.9767369e+01  -2.8630471e+01   3.5000000e+02  -2.3719969e+00  -1.3475797e+00   3.5810553e-01
   1.9889061e+01  -2.8701547e+01   3.5000000e+02  -2.4940191e+00  -1.3036596e+00   3.7032219e-01
   2.0013234e+01  -2.8769354e+01   3.5000000e+02  -2.6073433e+00  -1.2549426e+00   3.8501897e-01
   2.0139775e+01  -2.8833829e+01   3.5000000e+02  -2.7114093e+00  -1.2011920e+00   4.0170166e-01
   2.0268567e+01  -2.8894909e+01   3.5000000e+02  -2.8057791e+00  -1.1420918e+00   4.2002608e-01
   2.0399494e+01  -2.8952536e+01   3.5000000e+02  -2.8901236e+00  -1.0772687e+00   4.3983537e-01
   2.0532431e+01  -2.9006654e+01   3.5000000e+02  -2.9641927e+00  -1.0063272e+00   4.6118136e-01
   2.0667257e+01  -2.9057212e+01   3.5000000e+02  -3.0278009e+00  -9.2887883e-01   4.8432873e-01
   2.0803844e+01  -2.9104160e+01   3.5000000e+02  -3.0808010e+00  -8.4458282e-01   5.0975140e-01
   2.0942063e+01  -2.9147453e+01   3.5000000e+02  -3.1230739e+00  -7.5317795e-01   5.3812494e-01
   2.1081784e+01  -2.9187049e+01   3.5000000e+02  -3.1545208e+00  -6.5451904e-01   5.7030357e-01
   2.1222873e+01  -2.9222910e+01   3.5000000e+02  -3.1750639e+00  -5.4861421e-01   6.0729819e-01
   2.1365196e+01  -2.9255000e+01   3.5000000e+02  -3.1846570e+00  -4.3565841e-01   6.5023809e-01
   2.1508616e+01  -2.9283290e+01   3.5000000e+02  -3.1833016e+00  -3.1606934e-01   7.0034408e-01
   2.1652996e+01  -2.9307750e+01   3.5000000e+02  -3.1710719e+00  -1.9051753e-01   7.5886133e-01
   2.1798196e+01  -2.9328358e+01   3.5000000e+02  -3.1481409e+00  -5.9953879e-02   8.2702225e-01
   2.1944077e+01  -2.9345093e+01   3.5000000e+02  -3.1148108e+00   7.4378859e-02   9.0596293e-01
   2.2090497e+01  -2.9357939e+01   3.5000000e+02  -3.0715409e+00   2.1094230e-01   9.9665585e-01
   2.2237314e+01  -2.9366883e+01   3.5000000e+02  -3.0189709e+00   3.4792512e-01   1.0998259e+00
   2.2384387e+01  -2.9371917e+01   3.5000000e+02  -2.9579343e+00   4.8328520e-01   1.2158775e+00
   2.2531571e+01  -2.9373035e+01   3.5000000e+02  -2.8894654e+00   6.1481097e-01   1.3448161e+00
   2.2678725e+01  -2.9370237e+01   3.5000000e+02  -2.8147853e+00   7.4021225e-01   1.4862094e+00
   2.2825705e+01  -2.9363525e+01   3.5000000e+02  -2.7352828e+00   8.5721669e-01   1.6391460e+00
   2.2972370e+01  -2.9352906e+01   3.5000000e+02  -2.6524732e+00   9.6368158e-01   1.8022474e+00
   2.3118576e+01  -2.9338390e+01   3.5000000e+02  -2.5679552e+00   1.0576978e+00   1.9736902e+00
   2.3264182e+01  -2.9319991e+01   3.5000000e+02  -2.4833508e+00   1.1376896e+00   2.1512773e+00
   2.3409047e+01  -2.9297728e+01   3.5000000e+02  -2.4002480e+00   1.2024885e+00   2.3325245e+00
   2.3553033e+01  -2.9271622e+01   3.5000000e+02  -2.3201442e+00   1.2513869e+00   2.5147680e+00
   2.3695999e+01  -2.9241698e+01   3.5000000e+02  -2.2443992e+00   1.2841558e+00   2.6952763e+00
   2.3837809e+01  -2.9207986e+01   3.5000000e+02  -2.1741878e+00   1.3010361e+00   2.8713793e+00
   2.3978328e+01  -2.9170519e+01   3.5000000e+02  -2.1104774e+00   1.3027006e+00   3.0405678e+00
   2.4117420e+01  -2.9129332e+01   3.5000000e+02  -2.0540164e+00   1.2901961e+00   3.2005780e+00
   2.4254955e+01  -2.9084465e+01   3.5000000e+02  -2.0053251e+00   1.2648631e+00   3.3494710e+00
   2.4390802e+01  -2.9035963e+01   3.5000000e+02  -1.9647111e+00   1.2282547e+00   3.4856606e+00
   2.4524833e+01  -2.8983872e+01   3.5000000e+02  -1.9322896e+00   1.1820567e+00   3.6079293e+00
   2.4656923e+01  -2.8928242e+01   3.5000000e+02  -1.9080051e+00   1.1280088e+00   3.7154216e+00
   2.4786949e+01  -2.8869127e+01   3.5000000e+02  -1.8916604e+00   1.0678432e+00   3.8076150e+00
   2.4914790e+01  -2.8806583e+01   3.5000000e+02  -1.8829477e+00   1.0032368e+00   3.8842806e+00
   2.5040329e+01  -2.8740671e+01   3.5000000e+02  -1.8814720e+00   9.3577494e-01   3.9454432e+00
   2.5163451e+01  -2.8671454e+01   3.5000000e+02  -1.8867818e+00   8.6693436e-01   3.9913332e+00
   2.5837641e+01  -2.8373015e+01   3.5000000e+02  -1.8347617e+00   3.8193789e-01   4.1179970e+00
   2.5944205e+01  -2.8285289e+01   3.5000000e+02  -1.8719719e+00   3.2941724e-01   4.0821667e+00
   2.6047713e+01  -2.8194849e+01   3.5000000e+02  -1.9128706e+00   2.8272380e-01   4.0368412e+00
   2.6148081e+01  -2.8101775e+01   3.5000000e+02  -1.9572572e+00   2.4231557e-01   3.9829028e+00
   2.6245230e+01  -2.8006149e+01   3.5000000e+02  -2.0050245e+00   2.0848934e-01   3.9212052e+00
   2.6339083e+01  -2.7908057e+01   3.5000000e+02  -2.0561524e+00   1.8136974e-01   3.8525331e+00
   2.6429569e+01  -2.7807585e+01   3.5000000e+02  -2.1106921e+00   1.6090089e-01   3.7775559e+00
   2.6516617e+01  -2.7704820e+01   3.5000000e+02  -2.1687382e+00   1.4685311e-01   3.6967841e+00
   2.6600162e+01  -2.7599852e+01   3.5000000e+02  -2.2303825e+00   1.3882757e-01   3.6105366e+00
   2.6680143e+01  -2.7492774e+01   3.5000000e+02  -2.2956661e+00   1.3628069e-01   3.5189179e+00
   2.6756501e+01  -2.7383677e+01   3.5000000e+02  -2.3645329e+00   1.3856066e-01   3.4218096e+00
   2.6829181e+01  -2.7272657e+01   3.5000000e+02  -2.4367714e+00   1.4493950e-01   3.3188943e+00
   2.6898132e+01  -2.7159809e+01   3.5000000e+02  -2.5119804e+00   1.5465824e-01   3.2096889e+00
   2.6963308e+01  -2.7045230e+01   3.5000000e+02  -2.5895398e+00   1.6696462e-01   3.0936059e+00
   2.7024665e+01  -2.6929018e+01   3.5000000e+02  -2.6686078e+00   1.8115186e-01   2.9700219e+00
   2.7082162e+01  -2.6811273e+01   3.5000000e+02  -2.7481361e+00   1.9658523e-01   2.8383558e+00
   2.7135765e+01  -2.6692094e+01   3.5000000e+02  -2.8269084e+00   2.1271893e-01   2.6981402e+00
   2.7185439e+01  -2.6571583e+01   3.5000000e+02  -2.9035974e+00   2.2910851e-01   2.5490861e+00
   2.7231156e+01  -2.6449842e+01   3.5000000e+02  -2.9768341e+00   2.4540470e-01   2.3911284e+00
   2.7272890e+01  -2.6326972e+01   3.5000000e+02  -3.0452874e+00   2.6134745e-01   2.2244461e+00
   2.7310620e+01  -2.6203078e+01   3.5000000e+02  -3.1077357e+00   2.7674488e-01   2.0494724e+00
   2.7344327e+01  -2.6078262e+01   3.5000000e+02  -3.1631421e+00   2.9145664e-01   1.8668599e+00
   2.7373997e+01  -2.5952629e+01   3.5000000e+02  -3.2107054e+00   3.0536539e-01   1.6774510e+00
   2.7399618e+01  -2.5826283e+01   3.5000000e+02  -3.2499001e+00   3.1835545e-01   1.4822116e+00
   2.7421182e+01  -2.5699329e+01   3.5000000e+02  -3.2804918e+00   3.3028724e-01   1.2821703e+00
   2.7438684e+01  -2.5571871e+01   3.5000000e+02  -3.3025310e+00   3.4097776e-01   1.0783442e+00
   2.7452124e+01  -2.5444014e+01   3.5000000e+02  -3.3163251e+00   3.5018227e-01   8.7167822e-01
   2.7461504e+01  -2.5315862e+01   3.5000000e+02  -3.3223913e+00   3.5758519e-01   6.6298227e-01
   2.7466828e+01  -2.5187521e+01   3.5000000e+02  -3.3213937e+00   3.6279372e-01   4.5289355e-01
   2.7468106e+01  -2.5059095e+01   3.5000000e+02  -3.3140696e+00   3.6533566e-01   2.4184840e-01
   2.7465348e+01  -2.4930688e+01   3.5000000e+02  -3.3011504e+00   3.6466775e-01   3.0076800e-02
   2.7458571e+01  -2.4802405e+01   3.5000000e+02  -3.2832843e+00   3.6018214e-01  -1.8237221e-01
   2.7447792e+01  -2.4674347e+01   3.5000000e+02  -3.2609649e+00   3.5122427e-01  -3.9560548e-01
   2.7433031e+01  -2.4546619e+01   3.5000000e+02  -3.2344759e+00   3.3711026e-01  -6.0981233e-01
   2.7414313e+01  -2.4419322e+01   3.5000000e+02  -3.2038534e+00   3.1714725e-01  -8.2520284e-01
   2.7391663e+01  -2.4292559e+01   3.5000000e+02  -3.1688730e+00   2.9066096e-01  -1.0419219e+00
   2.7365113e+01  -2.4166431e+01   3.5000000e+02  -3.1290640e+00   2.5701928e-01  -1.2599670e+00
   2.7334694e+01  -2.4041037e+01   3.5000000e+02  -3.0837474e+00   2.1566235e-01  -1.4791219e+00
   2.7300442e+01  -2.3916477e+01   3.5000000e+02  -3.0321018e+00   1.6612892e-01  -1.6988893e+00
   2.7262393e+01  -2.3792850e+01   3.5000000e+02  -2.9732416e+00   1.0808160e-01  -1.9184639e+00
   2.7220590e+01  -2.3670253e+01   3.5000000e+02  -2.9063090e+00   4.1325059e-02  -2.1367224e+00
   2.7175073e+01  -2.3548782e+01   3.5000000e+02  -2.8305583e+00  -3.4179655e-02  -2.3522535e+00
   2.7125890e+01  -2.3428533e+01   3.5000000e+02  -2.7454400e+00  -1.1831124e-01  -2.5633958e+00
   2.7073088e+01  -2.3309600e+01   3.5000000e+02  -2.6506539e+00  -2.1079463e-01  -2.7683164e+00
   2.7016717e+01  -2.3192075e+01   3.5000000e+02  -2.5461882e+00  -3.1121660e-01  -2.9650852e+00
   2.6956831e+01  -2.3076050e+01   3.5000000e+02  -2.4323325e+00  -4.1904687e-01  -3.1517501e+00
   2.6893483e+01  -2.2961615e+01   3.5000000e+02  -2.3096627e+00  -5.3366842e-01  -3.3264135e+00
   2.6826733e+01  -2.2848859e+01   3.5000000e+02  -2.1790198e+00  -6.5440423e-01  -3.4872828e+00
   2.6756638e+01  -2.2737870e+01   3.5000000e+02  -2.0414638e+00  -7.8054673e-01  -3.6327156e+00
   2.6683260e+01  -2.2628732e+01   3.5000000e+02  -1.8982338e+00  -9.1137951e-01  -3.7612429e+00
   2.6606664e+01  -2.2521530e+01   3.5000000e+02  -1.7507080e+00  -1.0461860e+00  -3.8715771e+00
   2.6526914e+01  -2.2416347e+01   3.5000000e+02  -1.6003595e+00  -1.1842586e+00  -3.9626206e+00
   2.6444079e+01  -2.2313262e+01   3.5000000e+02  -1.4487268e+00  -1.3248932e+00  -4.0334678e+00
   2.6358228e+01  -2.2212356e+01   3.5000000e+02  -1.2973868e+00  -1.4673766e+00  -4.0834063e+00
   2.6269433e+01  -2.2113705e+01   3.5000000e+02  -1.1479285e+00  -1.6109782e+00  -4.1119309e+00
   2.6177765e+01  -2.2017385e+01   3.5000000e+02  -1.0019327e+00  -1.7549364e+00  -4.1187548e+00
   2.6083302e+01  -2.1923469e+01   3.5000000e+02  -8.6095496e-01  -1.8984476e+00  -4.1038336e+00
   2.5986118e+01  -2.1832028e+01   3.5000000e+02  -7.2649658e-01  -2.0406735e+00  -4.0673839e+00
   2.5886293e+01  -2.1743133e+01   3.5000000e+02  -5.9998912e-01  -2.1807421e+00  -4.0099084e+00
   2.5783907e+01  -2.1656850e+01   3.5000000e+02  -4.8276010e-01  -2.3177759e+00  -3.9322109e+00
   2.5679040e+01  -2.1573246e+01   3.5000000e+02  -3.7600887e-01  -2.4509184e+00  -3.8354026e+00
   2.5571775e+01  -2.1492382e+01   3.5000000e+02  -2.8077400e-01  -2.5793747e+00  -3.7209001e+00
   2.5462197e+01  -2.1414322e+01   3.5000000e+02  -1.9790765e-01  -2.7024527e+00  -3.5904049e+00
   2.5350392e+01  -2.1339122e+01   3.5000000e+02  -1.2804097e-01  -2.8196153e+00  -3.4458638e+00
   2.5236446e+01  -2.1266841e+01   3.5000000e+02  -7.1565140e-02  -2.9305211e+00  -3.2894128e+00
   2.5120447e+01  -2.1197533e+01   3.5000000e+02  -2.8610749e-02  -3.0350628e+00  -3.1233048e+00
   2.5002485e+01  -2.1131250e+01   3.5000000e+02   9.5983781e-04  -3.1333905e+00  -2.9498206e+00
   2.4882651e+01  -2.1068041e+01   3.5000000e+02   1.7550887e-02  -3.2259213e+00  -2.7711696e+00
   2.4761035e+01  -2.1007955e+01   3.5000000e+02   2.1818697e-02  -3.3133293e+00  -2.5893839e+00
   2.4637732e+01  -2.0951037e+01   3.5000000e+02   1.4645076e-02  -3.3965100e+00  -2.4062257e+00
   2.4512833e+01  -2.0897328e+01   3.5000000e+02  -2.9013691e-03  -3.4765342e+00  -2.2230860e+00
   2.4386435e+01  -2.0846871e+01   3.5000000e+02  -2.9611357e-02  -3.5545735e+00  -2.0409309e+00
   2.4258631e+01  -2.0799701e+01   3.5000000e+02  -6.4189871e-02  -3.6318242e+00  -1.8602398e+00
   2.4129519e+01  -2.0755855e+01   3.5000000e+02  -1.0530762e-01  -3.7094159e+00  -1.6810045e+00
   2.3999195e+01  -2.0715366e+01   3.5000000e+02  -1.5165451e-01  -3.7883283e+00  -1.5027324e+00
   2.3867758e+01  -2.0678263e+01   3.5000000e+02  -2.0198353e-01  -3.8693076e+00  -1.3244956e+00
   2.3735304e+01  -2.0644575e+01   3.5000000e+02  -2.5514606e-01  -3.9528053e+00  -1.1449913e+00
   2.3601934e+01  -2.0614326e+01   3.5000000e+02  -3.1011480e-01  -4.0389197e+00  -9.6263878e-01
   2.3467746e+01  -2.0587540e+01   3.5000000e+02  -3.6599609e-01  -4.1273724e+00  -7.7566875e-01
   2.3332841e+01  -2.0564237e+01   3.5000000e+02  -4.2203003e-01  -4.2174913e+00  -5.8223853e-01
   2.3197319e+01  -2.0544433e+01   3.5000000e+02  -4.7758269e-01  -4.3082222e+00  -3.8053452e-01
   2.3061279e+01  -2.0528143e+01   3.5000000e+02  -5.3212841e-01  -4.3981573e+00  -1.6887408e-01
   2.2924824e+01  -2.0515380e+01   3.5000000e+02  -5.8522691e-01  -4.4855756e+00   5.4192410e-02
   2.2788054e+01  -2.0506154e+01   3.5000000e+02  -6.3650217e-01  -4.5685051e+00   2.8981046e-01
   2.2651071e+01  -2.0500470e+01   3.5000000e+02  -6.8561740e-01  -4.6447889e+00   5.3874510e-01
   2.2513977e+01  -2.0498334e+01   3.5000000e+02  -7.3225120e-01  -4.7121669e+00   8.0133610e-01
   2.2376871e+01  -2.0499747e+01   3.5000000e+02  -7.7608219e-01  -4.7683592e+00   1.0774682e+00
   2.2239857e+01  -2.0504707e+01   3.5000000e+02  -8.1677144e-01  -4.8111512e+00   1.3665412e+00
   2.2103036e+01  -2.0513212e+01   3.5000000e+02  -8.5395462e-01  -4.8384866e+00   1.6674914e+00
   2.1966508e+01  -2.0525255e+01   3.5000000e+02  -8.8723912e-01  -4.8485495e+00   1.9788078e+00
   2.1830376e+01  -2.0540826e+01   3.5000000e+02  -9.1620215e-01  -4.8398457e+00   2.2985663e+00
   2.1694740e+01  -2.0559915e+01   3.5000000e+02  -9.4039419e-01  -4.8112743e+00   2.6245046e+00
   2.1559701e+01  -2.0582506e+01   3.5000000e+02  -9.5934594e-01  -4.7621825e+00   2.9540871e+00
   2.1425359e+01  -2.0608584e+01   3.5000000e+02  -9.7257100e-01  -4.6924054e+00   3.2846052e+00
   2.1291814e+01  -2.0638128e+01   3.5000000e+02  -9.7957468e-01  -4.6022798e+00   3.6132705e+00
   2.1159165e+01  -2.0671117e+01   3.5000000e+02  -9.7985501e-01  -4.4926345e+00   3.9373270e+00
   2.1027513e+01  -2.0707526e+01   3.5000000e+02  -9.7290777e-01  -4.3647542e+00   4.2541412e+00
   2.0896954e+01  -2.0747327e+01   3.5000000e+02  -9.5823011e-01  -4.2203083e+00   4.5613071e+00
   2.0767587e+01  -2.0790492e+01   3.5000000e+02  -9.3532070e-01  -4.0612733e+00   4.8567005e+00
   2.0639509e+01  -2.0836986e+01   3.5000000e+02  -9.0369312e-01  -3.8898237e+00   5.1385274e+00
   2.0512816e+01  -2.0886777e+01   3.5000000e+02  -8.6287807e-01  -3.7082263e+00   5.4053457e+00
   2.0387604e+01  -2.0939826e+01   3.5000000e+02  -8.1244920e-01  -3.5187348e+00   5.6560425e+00
   2.0263968e+01  -2.0996093e+01   3.5000000e+02  -7.5204038e-01  -3.3234969e+00   5.8898047e+00
   2.0142001e+01  -2.1055537e+01   3.5000000e+02  -6.8137265e-01  -3.1244803e+00   6.1060670e+00
   2.0021796e+01  -2.1118113e+01   3.5000000e+02  -6.0028777e-01  -2.9234284e+00   6.3044453e+00
   1.9903445e+01  -2.1183773e+01   3.5000000e+02  -5.0877707e-01  -2.7218385e+00   6.4846784e+00
   1.9787039e+01  -2.1252469e+01   3.5000000e+02  -4.0700280e-01  -2.5209649e+00   6.6465787e+00
   1.9672667e+01  -2.1324148e+01   3.5000000e+02  -2.9532288e-01  -2.3218389e+00   6.7899910e+00
   1.9560418e+01  -2.1398757e+01   3.5000000e+02  -1.7429182e-01  -2.1253075e+00   6.9147719e+00
   1.9450379e+01  -2.1476239e+01   3.5000000e+02  -4.4663008e-02  -1.9320705e+00   7.0207830e+00
   1.9342636e+01  -2.1556536e+01   3.5000000e+02   9.2630414e-02  -1.7427229e+00   7.1078971e+00
   1.9237273e+01  -2.1639587e+01   3.5000000e+02   2.3649651e-01  -1.5577889e+00   7.1760127e+00
   1.9134374e+01  -2.1725329e+01   3.5000000e+02   3.8571688e-01  -1.3777541e+00   7.2250714e+00
   1.9034020e+01  -2.1813697e+01   3.5000000e+02   5.3898120e-01  -1.2030810e+00   7.2550778e+00
   1.8936292e+01  -2.1904624e+01   3.5000000e+02   6.9492173e-01  -1.0342268e+00   7.2661127e+00
   1.8841268e+01  -2.1998041e+01   3.5000000e+02   8.5214567e-01  -8.7164556e-01   7.2583456e+00
   1.8749024e+01  -2.2093877e+01   3.5000000e+02   1.0092628e+00  -7.1579234e-01   7.2320397e+00
   1.8659637e+01  -2.2192059e+01   3.5000000e+02   1.1649080e+00  -5.6712861e-01   7.1875540e+00
   1.8573180e+01  -2.2292512e+01   3.5000000e+02   1.3177582e+00  -4.2611269e-01   7.1253447e+00
   1.8489724e+01  -2.2395159e+01   3.5000000e+02   1.4665450e+00  -2.9320161e-01   7.0459630e+00
   1.8409340e+01  -2.2499921e+01   3.5000000e+02   1.6100637e+00  -1.6885270e-01   6.9500547e+00
   1.8332096e+01  -2.2606718e+01   3.5000000e+02   1.7471823e+00  -5.3515802e-02   6.8383592e+00
   1.8258057e+01  -2.2715467e+01   3.5000000e+02   1.8768455e+00   5.2371332e-02   6.7117116e+00
   1.8187288e+01  -2.2826087e+01   3.5000000e+02   1.9980899e+00   1.4838327e-01   6.5710371e+00
   1.8119850e+01  -2.2938489e+01   3.5000000e+02   2.1100391e+00   2.3412591e-01   6.4173611e+00
   1.8055804e+01  -2.3052589e+01   3.5000000e+02   2.2119306e+00   3.0923854e-01   6.2517881e+00
   1.7995208e+01  -2.3168297e+01   3.5000000e+02   2.3031112e+00   3.7341751e-01   6.0755058e+00
   1.7938116e+01  -2.3285523e+01   3.5000000e+02   2.3830502e+00   4.2643318e-01   5.8897622e+00
   1.7884582e+01  -2.3404177e+01   3.5000000e+02   2.4513434e+00   4.6813954e-01   5.6958450e+00
   1.7834657e+01  -2.3524166e+01   3.5000000e+02   2.5077065e+00   4.9849657e-01   5.4950632e+00
   1.7788390e+01  -2.3645395e+01   3.5000000e+02   2.5519677e+00   5.1758049e-01   5.2887213e+00
   1.7745825e+01  -2.3767771e+01   3.5000000e+02   2.5840534e+00   5.2559475e-01   5.0780897e+00
   1.7707008e+01  -2.3891196e+01   3.5000000e+02   2.6039684e+00   5.2286301e-01   4.8644007e+00
   1.7671979e+01  -2.4015573e+01   3.5000000e+02   2.6117742e+00   5.0983650e-01   4.6488271e+00
   1.7640775e+01  -2.4140805e+01   3.5000000e+02   2.6075701e+00   4.8707917e-01   4.4324832e+00
   1.7613434e+01  -2.4266792e+01   3.5000000e+02   2.5914816e+00   4.5524787e-01   4.2164357e+00
   1.7589987e+01  -2.4393434e+01   3.5000000e+02   2.5636507e+00   4.1508693e-01   4.0017097e+00
   1.7570465e+01  -2.4520629e+01   3.5000000e+02   2.5242443e+00   3.6739646e-01   3.7893048e+00
   1.7554895e+01  -2.4648278e+01   3.5000000e+02   2.4734629e+00   3.1301536e-01   3.5801980e+00
   1.7543302e+01  -2.4776277e+01   3.5000000e+02   2.4115638e+00   2.5280219e-01   3.3753617e+00
   1.7535707e+01  -2.4904523e+01   3.5000000e+02   2.3388816e+00   1.8761530e-01   3.1757499e+00
   1.7532129e+01  -2.5032913e+01   3.5000000e+02   2.2558510e+00   1.1829214e-01   2.9822876e+00
   1.7532583e+01  -2.5161344e+01   3.5000000e+02   2.1630227e+00   4.5637202e-02   2.7958495e+00
   1.7537082e+01  -2.5289710e+01   3.5000000e+02   2.0610755e+00  -2.9593244e-02   2.6172361e+00
   1.7545634e+01  -2.5417909e+01   3.5000000e+02   1.9508069e+00  -1.0670028e-01   2.4471345e+00
   1.7558246e+01  -2.5545834e+01   3.5000000e+02   1.8331299e+00  -1.8505205e-01   2.2860997e+00
   1.7574920e+01  -2.5673382e+01   3.5000000e+02   1.7090393e+00  -2.6408510e-01   2.1345183e+00
   1.7595657e+01  -2.5800448e+01   3.5000000e+02   1.5795870e+00  -3.4330780e-01   1.9925968e+00
   1.7620451e+01  -2.5926927e+01   3.5000000e+02   1.4458401e+00  -4.2228628e-01   1.8603521e+00
   1.7649296e+01  -2.6052713e+01   3.5000000e+02   1.3088423e+00  -5.0064618e-01   1.7376100e+00
   1.7682181e+01  -2.6177704e+01   3.5000000e+02   1.1695651e+00  -5.7805155e-01   1.6240152e+00
   1.7719093e+01  -2.6301795e+01   3.5000000e+02   1.0288757e+00  -6.5419083e-01   1.5190578e+00
   1.7760012e+01  -2.6424881e+01   3.5000000e+02   8.8749808e-01  -7.2875151e-01   1.4221051e+00
   1.7804919e+01  -2.6546861e+01   3.5000000e+02   7.4598135e-01  -8.0141479e-01   1.3324348e+00
   1.7853789e+01  -2.6667631e+01   3.5000000e+02   6.0468933e-01  -8.7182891e-01   1.2492897e+00
   1.7906593e+01  -2.6787090e+01   3.5000000e+02   4.6378813e-01  -9.3960290e-01   1.1719226e+00
   1.7963299e+01  -2.6905135e+01   3.5000000e+02   3.2325963e-01  -1.0043048e+00   1.0996470e+00
   1.8023872e+01  -2.7021668e+01   3.5000000e+02   1.8291489e-01  -1.0654655e+00   1.0318803e+00
   1.8088273e+01  -2.7136588e+01   3.5000000e+02   4.2438158e-02  -1.1225901e+00   9.6818362e-01
   1.8156458e+01  -2.7249797e+01   3.5000000e+02  -9.8573668e-02  -1.1751748e+00   9.0828721e-01
   1.8228383e+01  -2.7361197e+01   3.5000000e+02  -2.4055499e-01  -1.2227378e+00   8.5209803e-01
   1.8303995e+01  -2.7470694e+01   3.5000000e+02  -3.8391551e-01  -1.2648329e+00   7.9970359e-01
   1.8383241e+01  -2.7578191e+01   3.5000000e+02  -5.2897795e-01  -1.3010893e+00   7.5134332e-01
   1.8466065e+01  -2.7683597e+01   3.5000000e+02  -6.7593544e-01  -1.3312276e+00   7.0737798e-01
   1.8552404e+01  -2.7786818e+01   3.5000000e+02  -8.2479831e-01  -1.3550766e+00   6.6824519e-01
   1.8642194e+01  -2.7887765e+01   3.5000000e+02  -9.7537677e-01  -1.3725862e+00   6.3440219e-01
   1.8735367e+01  -2.7986350e+01   3.5000000e+02  -1.1272634e+00  -1.3838261e+00   6.0627088e-01
   1.8831850e+01  -2.8082485e+01   3.5000000e+02  -1.2798367e+00  -1.3889773e+00   5.8418331e-01
   1.8931569e+01  -2.8176085e+01   3.5000000e+02  -1.4322878e+00  -1.3883144e+00   5.6833291e-01
   1.9034443e+01  -2.8267069e+01   3.5000000e+02  -1.5836538e+00  -1.3821740e+00   5.5874764e-01
   1.9140391e+01  -2.8355355e+01   3.5000000e+02  -1.7328643e+00  -1.3709306e+00   5.5526058e-01
   1.9249326e+01  -2.8440864e+01   3.5000000e+02  -1.8787939e+00  -1.3549542e+00   5.5751845e-01
   1.9361160e+01  -2.8523521e+01   3.5000000e+02  -2.0203202e+00  -1.3345771e+00   5.6499643e-01
   1.9475799e+01  -2.8603251e+01   3.5000000e+02  -2.1563665e+00  -1.3100634e+00   5.7703179e-01
   1.9593148e+01  -2.8679982e+01   3.5000000e+02  -2.2859491e+00  -1.2815825e+00   5.9286955e-01
   1.9713108e+01  -2.8753646e+01   3.5000000e+02  -2.4082058e+00  -1.2491916e+00   6.1172235e-01
   1.9835577e+01  -2.8824176e+01   3.5000000e+02  -2.5224113e+00  -1.2128309e+00   6.3282286e-01
   1.9960450e+01  -2.8891508e+01   3.5000000e+02  -2.6279828e+00  -1.1723264e+00   6.5548257e-01
   2.0087619e+01  -2.8955581e+01   3.5000000e+02  -2.7244718e+00  -1.1274032e+00   6.7914090e-01
   2.0216974e+01  -2.9016337e+01   3.5000000e+02  -2.8115479e+00  -1.0777065e+00   7.0340338e-01
   2.0348402e+01  -2.9073720e+01   3.5000000e+02  -2.8889750e+00  -1.0228294e+00   7.2806729e-01
   2.0481786e+01  -2.9127678e+01   3.5000000e+02  -2.9565860e+00  -9.6234254e-01   7.5314088e-01
   2.0617009e+01  -2.9178162e+01   3.5000000e+02  -3.0142592e+00  -8.9582587e-01   7.7884216e-01
   2.0753950e+01  -2.9225125e+01   3.5000000e+02  -3.0618954e+00  -8.2290158e-01   8.0559339e-01
   2.0892486e+01  -2.9268524e+01   3.5000000e+02  -3.0994035e+00  -7.4326401e-01   8.3401090e-01
   2.1032494e+01  -2.9308319e+01   3.5000000e+02  -3.1266926e+00  -6.5670946e-01   8.6488390e-01
   2.1173847e+01  -2.9344474e+01   3.5000000e+02  -3.1436709e+00  -5.6316824e-01   8.9915620e-01
   2.1316416e+01  -2.9376955e+01   3.5000000e+02  -3.1502557e+00  -4.6273514e-01   9.3789375e-01
   2.1460072e+01  -2.9405732e+01   3.5000000e+02  -3.1463895e+00  -3.5569846e-01   9.8225690e-01
   2.1604683e+01  -2.9430779e+01   3.5000000e+02  -3.1320636e+00  -2.4257227e-01   1.0334623e+00
   2.1750119e+01  -2.9452072e+01   3.5000000e+02  -3.1073474e+00  -1.2411909e-01   1.0927310e+00
   2.1896245e+01  -2.9469592e+01   3.5000000e+02  -3.0724191e+00  -1.3753372e-03   1.1612379e+00
   2.2042927e+01  -2.9483322e+01   3.5000000e+02  -3.0275989e+00   1.2434581e-01   1.2400396e+00
   2.2190030e+01  -2.9493249e+01   3.5000000e+02  -2.9733764e+00   2.5146048e-01   1.3300059e+00
   2.2337419e+01  -2.9499366e+01   3.5000000e+02  -2.9104312e+00   3.7814124e-01   1.4317494e+00
   2.2484958e+01  -2.9501665e+01   3.5000000e+02  -2.8396487e+00   5.0236817e-01   1.5455408e+00
   2.2632511e+01  -2.9500144e+01   3.5000000e+02  -2.7621160e+00   6.2199653e-01   1.6712637e+00
   2.2779941e+01  -2.9494806e+01   3.5000000e+02  -2.6791077e+00   7.3484283e-01   1.8083706e+00
   2.2927114e+01  -2.9485655e+01   3.5000000e+02  -2.5920577e+00   8.3878891e-01   1.9558631e+00
   2.3073893e+01  -2.9472699e+01   3.5000000e+02  -2.5025191e+00   9.3187817e-01   2.1123031e+00
   2.3220143e+01  -2.9455950e+01   3.5000000e+02  -2.4121094e+00   1.0124163e+00   2.2758583e+00
   2.3365730e+01  -2.9435425e+01   3.5000000e+02  -2.3224525e+00   1.0790534e+00   2.4443705e+00
   2.3510521e+01  -2.9411142e+01   3.5000000e+02  -2.2351224e+00   1.1308493e+00   2.6154404e+00
   2.3654382e+01  -2.9383123e+01   3.5000000e+02  -2.1515871e+00   1.1673086e+00   2.7865338e+00
   2.3797183e+01  -2.9351395e+01   3.5000000e+02  -2.0731558e+00   1.1883882e+00   2.9551002e+00
   2.3938794e+01  -2.9315986e+01   3.5000000e+02  -2.0009484e+00   1.1944805e+00   3.1186705e+00
   2.4079086e+01  -2.9276930e+01   3.5000000e+02  -1.9358665e+00   1.1863653e+00   3.2749582e+00
   2.4217933e+01  -2.9234263e+01   3.5000000e+02  -1.8785850e+00   1.1651500e+00   3.4219353e+00
   2.4355209e+01  -2.9188023e+01   3.5000000e+02  -1.8295567e+00   1.1321954e+00   3.5578816e+00
   2.4490792e+01  -2.9138253e+01   3.5000000e+02  -1.7890193e+00   1.0890336e+00   3.6814206e+00
   2.4624561e+01  -2.9085000e+01   3.5000000e+02  -1.7570191e+00   1.0372946e+00   3.7915199e+00
   2.4756397e+01  -2.9028311e+01   3.5000000e+02  -1.7334411e+00   9.7864192e-01   3.8874750e+00
   2.4886184e+01  -2.8968238e+01   3.5000000e+02  -1.7180312e+00   9.1471471e-01   3.9688847e+00
   2.5013808e+01  -2.8904837e+01   3.5000000e+02  -1.7104269e+00   8.4708917e-01   4.0356111e+00
   2.5139158e+01  -2.8838164e+01   3.5000000e+02  -1.7101890e+00   7.7725483e-01   4.0877377e+00
   2.5262125e+01  -2.8768281e+01   3.5000000e+02  -1.7168211e+00   7.0659730e-01   4.1255327e+00
   2.5382605e+01  -2.8695251e+01   3.5000000e+02  -1.7297972e+00   6.3639359e-01   4.1494144e+00
   2.5500495e+01  -2.8619139e+01   3.5000000e+02  -1.7485846e+00   5.6781515e-01   4.1599212e+00
   2.5615694e+01  -2.8540015e+01   3.5000000e+02  -1.7726601e+00   5.0192657e-01   4.1576932e+00
   2.5728107e+01  -2.8457949e+01   3.5000000e+02  -1.8015331e+00   4.3968493e-01   4.1434542e+00
   2.6355445e+01  -2.8089973e+01   3.5000000e+02  -1.8506662e+00   4.6800845e-02   3.9939183e+00
   2.6449408e+01  -2.7991713e+01   3.5000000e+02  -1.9025377e+00   2.1813555e-02   3.9265216e+00
   2.6540080e+01  -2.7891132e+01   3.5000000e+02  -1.9578025e+00   3.6763702e-03   3.8540057e+00
   2.6627397e+01  -2.7788315e+01   3.5000000e+02  -2.0166342e+00  -7.8704537e-03   3.7769009e+00
   2.6711295e+01  -2.7683346e+01   3.5000000e+02  -2.0792283e+00  -1.3251613e-02   3.6955245e+00
   2.6791717e+01  -2.7576312e+01   3.5000000e+02  -2.1457411e+00  -1.3042718e-02   3.6099559e+00
   2.6868606e+01  -2.7467302e+01   3.5000000e+02  -2.2162380e+00  -7.9305933e-03   3.5200270e+00
   2.6941911e+01  -2.7356404e+01   3.5000000e+02  -2.2906366e+00   1.3234309e-03   3.4253336e+00
   2.7011584e+01  -2.7243711e+01   3.5000000e+02  -2.3686542e+00   1.3925715e-02   3.3252788e+00
   2.7077579e+01  -2.7129314e+01   3.5000000e+02  -2.4497818e+00   2.9097981e-02   3.2191252e+00
   2.7139855e+01  -2.7013306e+01   3.5000000e+02  -2.5332647e+00   4.6110148e-02   3.1060733e+00
   2.7198373e+01  -2.6895781e+01   3.5000000e+02  -2.6181136e+00   6.4313185e-02   2.9853433e+00
   2.7253098e+01  -2.6776834e+01   3.5000000e+02  -2.7031359e+00   8.3157488e-02   2.8562571e+00
   2.7303999e+01  -2.6656561e+01   3.5000000e+02  -2.7869887e+00   1.0220222e-01   2.7183118e+00
   2.7351048e+01  -2.6535059e+01   3.5000000e+02  -2.8682479e+00   1.2111517e-01   2.5712366e+00
   2.7394220e+01  -2.6412423e+01   3.5000000e+02  -2.9454897e+00   1.3966397e-01   2.4150232e+00
   2.7433492e+01  -2.6288753e+01   3.5000000e+02  -3.0173669e+00   1.5769671e-01   2.2499463e+00
   2.7468848e+01  -2.6164146e+01   3.5000000e+02  -3.0826910e+00   1.7511928e-01   2.0765407e+00
   2.7500273e+01  -2.6038700e+01   3.5000000e+02  -3.1404962e+00   1.9187274e-01   1.8955679e+00
   2.7527753e+01  -2.5912516e+01   3.5000000e+02  -3.1900886e+00   2.0790640e-01   1.7079646e+00
   2.7551281e+01  -2.5785691e+01   3.5000000e+02  -3.2310759e+00   2.2315023e-01   1.5147670e+00
   2.7570851e+01  -2.5658325e+01   3.5000000e+02  -3.2633717e+00   2.3749415e-01   1.3170450e+00
   2.7586461e+01  -2.5530518e+01   3.5000000e+02  -3.2871791e+00   2.5076806e-01   1.1158253e+00
   2.7598111e+01  -2.5402369e+01   3.5000000e+02  -3.3029523e+00   2.6272941e-01   9.1202092e-01
   2.7605805e+01  -2.5273977e+01   3.5000000e+02  -3.3113393e+00   2.7305334e-01   7.0637932e-01
   2.7609551e+01  -2.5145441e+01   3.5000000e+02  -3.3131104e+00   2.8133027e-01   4.9944441e-01
   2.7609357e+01  -2.5016861e+01   3.5000000e+02  -3.3090791e+00   2.8707152e-01   2.9153689e-01
   2.7605236e+01  -2.4888335e+01   3.5000000e+02  -3.3000191e+00   2.8971454e-01   8.2757043e-02
   2.7597204e+01  -2.4759962e+01   3.5000000e+02  -3.2865849e+00   2.8863674e-01  -1.2698556e-01
   2.7585278e+01  -2.4631839e+01   3.5000000e+02  -3.2692423e+00   2.8317301e-01  -3.3793119e-01
   2.7569480e+01  -2.4504064e+01   3.5000000e+02  -3.2482147e+00   2.7263339e-01  -5.5039613e-01
   2.7549834e+01  -2.4376734e+01   3.5000000e+02  -3.2234504e+00   2.5632711e-01  -7.6469934e-01
   2.7526364e+01  -2.4249945e+01   3.5000000e+02  -3.1946149e+00   2.3358770e-01  -9.8107826e-01
   2.7499101e+01  -2.4123793e+01   3.5000000e+02  -3.1611115e+00   2.0379659e-01  -1.1995959e+00
   2.7468076e+01  -2.3998372e+01   3.5000000e+02  -3.1221269e+00   1.6641214e-01  -1.4200748e+00
   2.7433323e+01  -2.3873777e+01   3.5000000e+02  -3.0767023e+00   1.2099540e-01  -1.6420327e+00
   2.7394878e+01  -2.3750101e+01   3.5000000e+02  -3.0238186e+00   6.7232754e-02  -1.8646559e+00
   2.7352780e+01  -2.3627436e+01   3.5000000e+02  -2.9624922e+00   4.9545576e-03  -2.0867941e+00
   2.7307070e+01  -2.3505874e+01   3.5000000e+02  -2.8918675e+00  -6.5852340e-02  -2.3069864e+00
   2.7257792e+01  -2.3385504e+01   3.5000000e+02  -2.8112976e+00  -1.4504355e-01  -2.5235191e+00
   2.7204991e+01  -2.3266416e+01   3.5000000e+02  -2.7204065e+00  -2.3232137e-01  -2.7344931e+00
   2.7148715e+01  -2.3148697e+01   3.5000000e+02  -2.6191256e+00  -3.2725395e-01  -2.9379115e+00
   2.7089014e+01  -2.3032435e+01   3.5000000e+02  -2.5077076e+00  -4.2929682e-01  -3.1317572e+00
   2.7025940e+01  -2.2917715e+01   3.5000000e+02  -2.3867130e+00  -5.3782578e-01  -3.3140726e+00
   2.6959549e+01  -2.2804620e+01   3.5000000e+02  -2.2569831e+00  -6.5216747e-01  -3.4830163e+00
   2.6889895e+01  -2.2693235e+01   3.5000000e+02  -2.1195974e+00  -7.7162676e-01  -3.6369022e+00
   2.6817037e+01  -2.2583640e+01   3.5000000e+02  -1.9758276e+00  -8.9551489e-01  -3.7742294e+00
   2.6741035e+01  -2.2475915e+01   3.5000000e+02  -1.8270925e+00  -1.0231613e+00  -3.8936876e+00
   2.6661951e+01  -2.2370139e+01   3.5000000e+02  -1.6749156e+00  -1.1539196e+00  -3.9941598e+00
   2.6579849e+01  -2.2266389e+01   3.5000000e+02  -1.5208880e+00  -1.2871643e+00  -4.0747208e+00
   2.6494794e+01  -2.2164739e+01   3.5000000e+02  -1.3666361e+00  -1.4222801e+00  -4.1346369e+00
   2.6406854e+01  -2.2065263e+01   3.5000000e+02  -1.2137998e+00  -1.5586416e+00  -4.1733671e+00
   2.6316096e+01  -2.1968034e+01   3.5000000e+02  -1.0640066e+00  -1.6955989e+00  -4.1905738e+00
   2.6222593e+01  -2.1873121e+01   3.5000000e+02  -9.1885354e-01  -1.8324606e+00  -4.1861423e+00
   2.6126416e+01  -2.1780593e+01   3.5000000e+02  -7.7988346e-01  -1.9684882e+00  -4.1601967e+00
   2.6027637e+01  -2.1690516e+01   3.5000000e+02  -6.4856336e-01  -2.1028972e+00  -4.1131240e+00
   2.5926334e+01  -2.1602955e+01   3.5000000e+02  -5.2626498e-01  -2.2348648e+00  -4.0455968e+00
   2.5822581e+01  -2.1517973e+01   3.5000000e+02  -4.1423197e-01  -2.3635614e+00  -3.9585815e+00
   2.5716457e+01  -2.1435631e+01   3.5000000e+02  -3.1355776e-01  -2.4881780e+00  -3.8533485e+00
   2.5608040e+01  -2.1355988e+01   3.5000000e+02  -2.2515393e-01  -2.6079733e+00  -3.7314588e+00
   2.5497412e+01  -2.1279101e+01   3.5000000e+02  -1.4972488e-01  -2.7223167e+00  -3.5947433e+00
   2.5384653e+01  -2.1205024e+01   3.5000000e+02  -8.7740075e-02  -2.8307415e+00  -3.4452534e+00
   2.5269847e+01  -2.1133811e+01   3.5000000e+02  -3.9417291e-02  -2.9329834e+00  -3.2852081e+00
   2.5153077e+01  -2.1065512e+01   3.5000000e+02  -4.7067448e-03  -3.0290208e+00  -3.1169087e+00
   2.5034429e+01  -2.1000176e+01   3.5000000e+02   1.6709817e-02  -3.1190926e+00  -2.9426534e+00
   2.4913988e+01  -2.0937849e+01   3.5000000e+02   2.5411570e-02  -3.2037057e+00  -2.7646313e+00
   2.4791842e+01  -2.0878576e+01   3.5000000e+02   2.2216705e-02  -3.2836170e+00  -2.5848261e+00
   2.4668078e+01  -2.0822399e+01   3.5000000e+02   8.1491890e-03  -3.3597996e+00  -2.4049138e+00
   2.4542785e+01  -2.0769358e+01   3.5000000e+02  -1.5605694e-02  -3.4333853e+00  -2.2261830e+00
   2.4416053e+01  -2.0719489e+01   3.5000000e+02  -4.7753682e-02  -3.5055942e+00  -2.0494708e+00
   2.4287972e+01  -2.0672830e+01   3.5000000e+02  -8.6946867e-02  -3.5776547e+00  -1.8751256e+00
   2.4158634e+01  -2.0629412e+01   3.5000000e+02  -1.3184017e-01  -3.6507132e+00  -1.7029993e+00
   2.4028130e+01  -2.0589266e+01   3.5000000e+02  -1.8114163e-01  -3.7257543e+00  -1.5324658e+00
   2.3896552e+01  -2.0552422e+01   3.5000000e+02  -2.3365403e-01  -3.8035226e+00  -1.3624711e+00
   2.3763993e+01  -2.0518904e+01   3.5000000e+02  -2.8830735e-01  -3.8844574e+00  -1.1916036e+00
   2.3630548e+01  -2.0488737e+01   3.5000000e+02  -3.4417490e-01  -3.9686481e+00  -1.0181840e+00
   2.3496310e+01  -2.0461942e+01   3.5000000e+02  -4.0048231e-01  -4.0558071e+00  -8.4035936e-01
   2.3361374e+01  -2.0438538e+01   3.5000000e+02  -4.5660043e-01  -4.1452584e+00  -6.5621248e-01
   2.3225834e+01  -2.0418541e+01   3.5000000e+02  -5.1203213e-01  -4.2359496e+00  -4.6386211e-01
   2.3089785e+01  -2.0401965e+01   3.5000000e+02  -5.6638984e-01  -4.3264777e+00  -2.6156420e-01
   2.2953324e+01  -2.0388823e+01   3.5000000e+02  -6.1936928e-01  -4.4151318e+00  -4.7803030e-02
   2.2816545e+01  -2.0379124e+01   3.5000000e+02  -6.7072486e-01  -4.4999505e+00   1.7863758e-01
   2.2679544e+01  -2.0372873e+01   3.5000000e+02  -7.2024120e-01  -4.5787850e+00   4.1860195e-01
   2.2542418e+01  -2.0370077e+01   3.5000000e+02  -7.6770769e-01  -4.6493767e+00   6.7251791e-01
   2.2405262e+01  -2.0370736e+01   3.5000000e+02  -8.1290229e-01  -4.7094353e+00   9.4036491e-01
   2.2268172e+01  -2.0374850e+01   3.5000000e+02  -8.5557349e-01  -4.7567230e+00   1.2216562e+00
   2.2131245e+01  -2.0382417e+01   3.5000000e+02  -8.9543164e-01  -4.7891392e+00   1.5154383e+00
   2.1994576e+01  -2.0393431e+01   3.5000000e+02  -9.3214634e-01  -4.8048031e+00   1.8203145e+00
   2.1858260e+01  -2.0407884e+01   3.5000000e+02  -9.6534580e-01  -4.8021325e+00   2.1344777e+00
   2.1722394e+01  -2.0425766e+01   3.5000000e+02  -9.9462027e-01  -4.7799161e+00   2.4557601e+00
   2.1587073e+01  -2.0447065e+01   3.5000000e+02  -1.0195293e+00  -4.7373729e+00   2.7817129e+00
   2.1452392e+01  -2.0471765e+01   3.5000000e+02  -1.0396085e+00  -4.6741957e+00   3.1096865e+00
   2.1318446e+01  -2.0499849e+01   3.5000000e+02  -1.0543745e+00  -4.5905752e+00   3.4369307e+00
   2.1185328e+01  -2.0531297e+01   3.5000000e+02  -1.0633303e+00  -4.4871967e+00   3.7607019e+00
   2.1053132e+01  -2.0566086e+01   3.5000000e+02  -1.0659673e+00  -4.3652134e+00   4.0783601e+00
   2.0921953e+01  -2.0604193e+01   3.5000000e+02  -1.0617645e+00  -4.2261928e+00   4.3874668e+00
   2.0791883e+01  -2.0645591e+01   3.5000000e+02  -1.0501925e+00  -4.0720308e+00   4.6858677e+00
   2.0663013e+01  -2.0690249e+01   3.5000000e+02  -1.0307158e+00  -3.9048541e+00   4.9717425e+00
   2.0535436e+01  -2.0738137e+01   3.5000000e+02  -1.0027953e+00  -3.7269149e+00   5.2436283e+00
   2.0409243e+01  -2.0789220e+01   3.5000000e+02  -9.6590545e-01  -3.5404744e+00   5.5004173e+00
   2.0284523e+01  -2.0843462e+01   3.5000000e+02  -9.1954951e-01  -3.3477006e+00   5.7413268e+00
   2.0161365e+01  -2.0900825e+01   3.5000000e+02  -8.6328609e-01  -3.1505887e+00   5.9658399e+00
   2.0039859e+01  -2.0961268e+01   3.5000000e+02  -7.9676127e-01  -2.9509047e+00   6.1736370e+00
   1.9920092e+01  -2.1024748e+01   3.5000000e+02  -7.1974180e-01  -2.7501485e+00   6.3645311e+00
   1.9802151e+01  -2.1091220e+01   3.5000000e+02  -6.3214804e-01  -2.5495563e+00   6.5383995e+00
   1.9686120e+01  -2.1160637e+01   3.5000000e+02  -5.3408205e-01  -2.3501156e+00   6.6951362e+00
   1.9572085e+01  -2.1232948e+01   3.5000000e+02  -4.2585030e-01  -2.1526109e+00   6.8346133e+00
   1.9460129e+01  -2.1308104e+01   3.5000000e+02  -3.0796352e-01  -1.9576619e+00   6.9566760e+00
   1.9350335e+01  -2.1386049e+01   3.5000000e+02  -1.8114585e-01  -1.7657766e+00   7.0611381e+00
   1.9242784e+01  -2.1466728e+01   3.5000000e+02  -4.6307375e-02  -1.5773927e+00   7.1478039e+00
   1.9137555e+01  -2.1550084e+01   3.5000000e+02   9.5477420e-02  -1.3929140e+00   7.2164897e+00
   1.9034727e+01  -2.1636057e+01   3.5000000e+02   2.4300048e-01  -1.2127404e+00   7.2670480e+00
   1.8934378e+01  -2.1724585e+01   3.5000000e+02   3.9495797e-01  -1.0372831e+00   7.2993921e+00
   1.8836583e+01  -2.1815605e+01   3.5000000e+02   5.4998821e-01  -8.6696935e-01   7.3135149e+00
   1.8741417e+01  -2.1909051e+01   3.5000000e+02   7.0670155e-01  -7.0224947e-01   7.3094998e+00
   1.8648953e+01  -2.2004856e+01   3.5000000e+02   8.6371213e-01  -5.4359140e-01   7.2875269e+00
   1.8559262e+01  -2.2102951e+01   3.5000000e+02   1.0196588e+00  -3.9147691e-01   7.2478750e+00
   1.8472415e+01  -2.2203264e+01   3.5000000e+02   1.1732204e+00  -2.4640072e-01   7.1909198e+00
   1.8388478e+01  -2.2305724e+01   3.5000000e+02   1.3231337e+00  -1.0885835e-01   7.1171299e+00
   1.8307520e+01  -2.2410257e+01   3.5000000e+02   1.4681956e+00   2.0643587e-02   7.0270672e+00
   1.8229604e+01  -2.2516785e+01   3.5000000e+02   1.6072687e+00   1.4160662e-01   6.9213879e+00
   1.8154795e+01  -2.2625233e+01   3.5000000e+02   1.7392978e+00   2.5353024e-01   6.8008380e+00
   1.8083152e+01  -2.2735520e+01   3.5000000e+02   1.8633047e+00   3.5593357e-01   6.6662629e+00
   1.8014736e+01  -2.2847567e+01   3.5000000e+02   1.9784090e+00   4.4834946e-01   6.5186010e+00
   1.7949604e+01  -2.2961291e+01   3.5000000e+02   2.0838306e+00   5.3034872e-01   6.3588874e+00
   1.7887810e+01  -2.3076610e+01   3.5000000e+02   2.1789062e+00   6.0155274e-01   6.1882410e+00
   1.7829410e+01  -2.3193438e+01   3.5000000e+02   2.2630950e+00   6.6164365e-01   6.0078596e+00
   1.7774454e+01  -2.3311689e+01   3.5000000e+02   2.3359861e+00   7.1039583e-01   5.8189946e+00
   1.7722991e+01  -2.3431277e+01   3.5000000e+02   2.3972998e+00   7.4768406e-01   5.6229286e+00
   1.7675069e+01  -2.3552112e+01   3.5000000e+02   2.4468774e+00   7.7349993e-01   5.4209554e+00
   1.7630732e+01  -2.3674106e+01   3.5000000e+02   2.4846698e+00   7.8796448e-01   5.2143450e+00
   1.7590022e+01  -2.3797168e+01   3.5000000e+02   2.5107150e+00   7.9133141e-01   5.0043303e+00
   1.7552981e+01  -2.3921205e+01   3.5000000e+02   2.5251162e+00   7.8398141e-01   4.7920920e+00
   1.7519646e+01  -2.4046126e+01   3.5000000e+02   2.5280159e+00   7.6642075e-01   4.5787441e+00
   1.7490053e+01  -2.4171837e+01   3.5000000e+02   2.5195760e+00   7.3926381e-01   4.3653462e+00
   1.7464233e+01  -2.4298243e+01   3.5000000e+02   2.4999634e+00   7.0322157e-01   4.1529095e+00
   1.7442219e+01  -2.4425250e+01   3.5000000e+02   2.4693498e+00   6.5906755e-01   3.9424086e+00
   1.7424038e+01  -2.4552761e+01   3.5000000e+02   2.4279143e+00   6.0763317e-01   3.7348013e+00
   1.7409714e+01  -2.4680680e+01   3.5000000e+02   2.3758609e+00   5.4977809e-01   3.5310327e+00
   1.7399272e+01  -2.4808910e+01   3.5000000e+02   2.3134429e+00   4.8636377e-01   3.3320421e+00
   1.7392729e+01  -2.4937353e+01   3.5000000e+02   2.2409831e+00   4.1825009e-01   3.1387554e+00
   1.7390105e+01  -2.5065911e+01   3.5000000e+02   2.1589021e+00   3.4625821e-01   2.9520681e+00
   1.7391413e+01  -2.5194486e+01   3.5000000e+02   2.0677289e+00   2.7117299e-01   2.7728210e+00
   1.7396664e+01  -2.5322979e+01   3.5000000e+02   1.9681121e+00   1.9372221e-01   2.6017722e+00
   1.7405867e+01  -2.5451290e+01   3.5000000e+02   1.8608169e+00   1.1456670e-01   2.4395657e+00
   1.7419027e+01  -2.5579320e+01   3.5000000e+02   1.7467086e+00   3.4296157e-02   2.2867004e+00
   1.7436148e+01  -2.5706971e+01   3.5000000e+02   1.6267300e+00  -4.6578228e-02   2.1435062e+00
   1.7457228e+01  -2.5834142e+01   3.5000000e+02   1.5018735e+00  -1.2761199e-01   2.0101338e+00
   1.7482265e+01  -2.5960734e+01   3.5000000e+02   1.3731422e+00  -2.0843263e-01   1.8865410e+00
   1.7511251e+01  -2.6086648e+01   3.5000000e+02   1.2415117e+00  -2.8871718e-01   1.7725000e+00
   1.7544176e+01  -2.6211786e+01   3.5000000e+02   1.1078923e+00  -3.6818279e-01   1.6676089e+00
   1.7581028e+01  -2.6336047e+01   3.5000000e+02   9.7309580e-01  -4.4656652e-01   1.5713170e+00
   1.7621791e+01  -2.6459334e+01   3.5000000e+02   8.3779544e-01  -5.2360296e-01   1.4829522e+00
   1.7666444e+01  -2.6581549e+01   3.5000000e+02   7.0250505e-01  -5.9900193e-01   1.4017649e+00
   1.7714966e+01  -2.6702594e+01   3.5000000e+02   5.6756080e-01  -6.7243989e-01   1.3269696e+00
   1.7767330e+01  -2.6822373e+01   3.5000000e+02   4.3311147e-01  -7.4354027e-01   1.2577961e+00
[truncated: 3,642,157 more chars]
