# Supplementary material for: A high-resolution lithospheric magnetic field model over southern Africa based on a joint inversion of CHAMP, Swarm, WDMAM, and ground magnetic field data
Source: Copernicus journal article supplement (doi:10.5194/se-9-897-2018), 2018-07-16
Supplement: Supplementary file 1 [file se-9-897-2018-supplement.zip › SupplementaryMaterial/ModelSA400km.txt]

   2.2500005e+01  -2.4999991e+01   4.0000000e+02   6.9180319e-01  -1.8752384e+00  -3.3323741e+00
   2.2566483e+01  -2.5124977e+01   4.0000000e+02   4.8999249e-01  -1.6823717e+00  -3.4561741e+00
   2.2649272e+01  -2.5030796e+01   4.0000000e+02   5.0811337e-01  -1.7150352e+00  -3.4187462e+00
   2.2619593e+01  -2.4913455e+01   4.0000000e+02   6.6039872e-01  -1.8709241e+00  -3.3123918e+00
   2.2500000e+01  -2.4861269e+01   4.0000000e+02   8.3222926e-01  -2.0252749e+00  -3.1991421e+00
   2.2380407e+01  -2.4913455e+01   4.0000000e+02   8.9809036e-01  -2.0613348e+00  -3.1787246e+00
   2.2350728e+01  -2.5030796e+01   4.0000000e+02   8.0623231e-01  -1.9601746e+00  -3.2777641e+00
   2.2433517e+01  -2.5124977e+01   4.0000000e+02   6.2304149e-01  -1.7943027e+00  -3.4024313e+00
   2.2791110e+01  -2.5050403e+01   4.0000000e+02   3.4036360e-01  -1.5655500e+00  -3.4680665e+00
   2.2783469e+01  -2.4922052e+01   4.0000000e+02   4.8315644e-01  -1.7183129e+00  -3.3803115e+00
   2.2711005e+01  -2.4811602e+01   4.0000000e+02   6.6763745e-01  -1.9060949e+00  -3.2601635e+00
   2.2590406e+01  -2.4744279e+01   4.0000000e+02   8.5273744e-01  -2.0799601e+00  -3.1275689e+00
   2.2449214e+01  -2.4735429e+01   4.0000000e+02   9.9961768e-01  -2.1976160e+00  -3.0223351e+00
   2.2319588e+01  -2.4787069e+01   4.0000000e+02   1.0770890e+00  -2.2361388e+00  -2.9864979e+00
   2.2231095e+01  -2.4887431e+01   4.0000000e+02   1.0657036e+00  -2.1941850e+00  -3.0384954e+00
   2.2204049e+01  -2.5013608e+01   4.0000000e+02   9.6383034e-01  -2.0850738e+00  -3.1602847e+00
   2.2244821e+01  -2.5136726e+01   4.0000000e+02   7.9262685e-01  -1.9298738e+00  -3.3076182e+00
   2.2344231e+01  -2.5228534e+01   4.0000000e+02   5.9318084e-01  -1.7565276e+00  -3.4342547e+00
   2.2479512e+01  -2.5267912e+01   4.0000000e+02   4.1458634e-01  -1.6009061e+00  -3.5124542e+00
   2.2619515e+01  -2.5245788e+01   4.0000000e+02   2.9940010e-01  -1.5015407e+00  -3.5381721e+00
   2.2731985e+01  -2.5167260e+01   4.0000000e+02   2.7328868e-01  -1.4872589e+00  -3.5208040e+00
   2.2627648e+01  -2.4622121e+01   4.0000000e+02   9.2291004e-01  -2.1819872e+00  -3.0101331e+00
   2.2485785e+01  -2.4604968e+01   4.0000000e+02   1.0755380e+00  -2.3072482e+00  -2.8836742e+00
   2.2345448e+01  -2.4630489e+01   4.0000000e+02   1.1878039e+00  -2.3778271e+00  -2.7993068e+00
   2.2221716e+01  -2.4695945e+01   4.0000000e+02   1.2479214e+00  -2.3912026e+00  -2.7779023e+00
   2.2127926e+01  -2.4794296e+01   4.0000000e+02   1.2471650e+00  -2.3517521e+00  -2.8265129e+00
   2.2074261e+01  -2.4914949e+01   4.0000000e+02   1.1820330e+00  -2.2672533e+00  -2.9358353e+00
   2.2066638e+01  -2.5044874e+01   4.0000000e+02   1.0567145e+00  -2.1461268e+00  -3.0835044e+00
   2.2106024e+01  -2.5169999e+01   4.0000000e+02   8.8421480e-01  -1.9968647e+00  -3.2413124e+00
   2.2188274e+01  -2.5276731e+01   4.0000000e+02   6.8502101e-01  -1.8295478e+00  -3.3831009e+00
   2.2304526e+01  -2.5353443e+01   4.0000000e+02   4.8356230e-01  -1.6578976e+00  -3.4907883e+00
   2.2442139e+01  -2.5391760e+01   4.0000000e+02   3.0391129e-01  -1.4997963e+00  -3.5571989e+00
   2.2586081e+01  -2.5387492e+01   4.0000000e+02   1.6628358e-01  -1.3751557e+00  -3.5852201e+00
   2.2720608e+01  -2.5341106e+01   4.0000000e+02   8.5042870e-02  -1.3018628e+00  -3.5837407e+00
   2.2831035e+01  -2.5257672e+01   4.0000000e+02   6.7917510e-02  -1.2917858e+00  -3.5619562e+00
   2.2905370e+01  -2.5146297e+01   4.0000000e+02   1.1570253e-01  -1.3483845e+00  -3.5244307e+00
   2.2935626e+01  -2.5019107e+01   4.0000000e+02   2.2213455e-01  -1.4660784e+00  -3.4692293e+00
   2.2918657e+01  -2.4889911e+01   4.0000000e+02   3.7438369e-01  -1.6308005e+00  -3.3902854e+00
   2.2856438e+01  -2.4772694e+01   4.0000000e+02   5.5482018e-01  -1.8215897e+00  -3.2831735e+00
   2.2755800e+01  -2.4680108e+01   4.0000000e+02   7.4388781e-01  -2.0135251e+00  -3.1514677e+00
   2.2005477e+01  -2.4730152e+01   4.0000000e+02   1.4102602e+00  -2.4801109e+00  -2.6075129e+00
   2.1948449e+01  -2.4845263e+01   4.0000000e+02   1.3576151e+00  -2.4037014e+00  -2.7160390e+00
   2.1923356e+01  -2.4969413e+01   4.0000000e+02   1.2596731e+00  -2.3031621e+00  -2.8586384e+00
   2.1931748e+01  -2.5095402e+01   4.0000000e+02   1.1210289e+00  -2.1818329e+00  -3.0185113e+00
   2.1973238e+01  -2.5215904e+01   4.0000000e+02   9.5018076e-01  -2.0426259e+00  -3.1784885e+00
   2.2045499e+01  -2.5323890e+01   4.0000000e+02   7.5875210e-01  -1.8890892e+00  -3.3235079e+00
   2.2144380e+01  -2.5413044e+01   4.0000000e+02   5.6011087e-01  -1.7265398e+00  -3.4424461e+00
   2.2264136e+01  -2.5478137e+01   4.0000000e+02   3.6781025e-01  -1.5627558e+00  -3.5291940e+00
   2.2397759e+01  -2.5515346e+01   4.0000000e+02   1.9423566e-01  -1.4078208e+00  -3.5828867e+00
   2.2537398e+01  -2.5522483e+01   4.0000000e+02   4.9712727e-02  -1.2730703e+00  -3.6072202e+00
   2.2674836e+01  -2.5499126e+01   4.0000000e+02  -5.7883191e-02  -1.1694755e+00  -3.6089329e+00
   2.2801990e+01  -2.5446650e+01   4.0000000e+02  -1.2315995e-01  -1.1060300e+00  -3.5957300e+00
   2.2911403e+01  -2.5368141e+01   4.0000000e+02  -1.4311094e-01  -1.0886399e+00  -3.5740926e+00
   2.2996693e+01  -2.5268206e+01   4.0000000e+02  -1.1710841e-01  -1.1196619e+00  -3.5474853e+00
   2.3052932e+01  -2.5152698e+01   4.0000000e+02  -4.7057276e-02  -1.1978936e+00  -3.5154278e+00
   2.3076921e+01  -2.5028363e+01   4.0000000e+02   6.2451006e-02  -1.3187423e+00  -3.4737538e+00
   2.3067361e+01  -2.4902443e+01   4.0000000e+02   2.0421502e-01  -1.4744096e+00  -3.4161057e+00
   2.3024906e+01  -2.4782247e+01   4.0000000e+02   3.6897105e-01  -1.6542071e+00  -3.3363625e+00
   2.2952106e+01  -2.4674736e+01   4.0000000e+02   5.4638078e-01  -1.8451878e+00  -3.2313717e+00
   2.2853234e+01  -2.4586117e+01   4.0000000e+02   7.2621734e-01  -2.0332647e+00  -3.1031529e+00
   2.2734035e+01  -2.4521494e+01   4.0000000e+02   8.9926507e-01  -2.2046926e+00  -2.9598652e+00
   2.2601387e+01  -2.4484584e+01   4.0000000e+02   1.0576595e+00  -2.3476919e+00  -2.8151709e+00
   2.2462919e+01  -2.4477508e+01   4.0000000e+02   1.1946423e+00  -2.4538366e+00  -2.6861083e+00
   2.2326579e+01  -2.4500672e+01   4.0000000e+02   1.3040586e+00  -2.5188596e+00  -2.5899527e+00
   2.2200199e+01  -2.4552745e+01   4.0000000e+02   1.3799959e+00  -2.5425987e+00  -2.5407891e+00
   2.2091059e+01  -2.4630734e+01   4.0000000e+02   1.4169041e+00  -2.5280902e+00  -2.5465828e+00
   2.1844868e+01  -2.5273528e+01   4.0000000e+02   9.9209870e-01  -2.0714690e+00  -3.1188886e+00
   2.1916247e+01  -2.5384116e+01   4.0000000e+02   7.9751637e-01  -1.9234391e+00  -3.2699048e+00
   2.2010268e+01  -2.5479941e+01   4.0000000e+02   5.9546700e-01  -1.7651732e+00  -3.3966363e+00
   2.2123330e+01  -2.5557281e+01   4.0000000e+02   3.9563625e-01  -1.6009196e+00  -3.4941143e+00
   2.2251066e+01  -2.5613127e+01   4.0000000e+02   2.0703775e-01  -1.4368485e+00  -3.5607518e+00
   2.2388512e+01  -2.5645302e+01   4.0000000e+02   3.7482085e-02  -1.2806821e+00  -3.5982140e+00
   2.2530311e+01  -2.5652548e+01   4.0000000e+02  -1.0669768e-01  -1.1408870e+00  -3.6108925e+00
   2.2670926e+01  -2.5634584e+01   4.0000000e+02  -2.2067701e-01  -1.0256518e+00  -3.6050095e+00
   2.2804870e+01  -2.5592111e+01   4.0000000e+02  -3.0099736e-01  -9.4194317e-01  -3.5874666e+00
   2.2926927e+01  -2.5526786e+01   4.0000000e+02  -3.4538622e-01  -8.9486222e-01  -3.5646043e+00
   2.3032366e+01  -2.5441153e+01   4.0000000e+02  -3.5265179e-01  -8.8739087e-01  -3.5410601e+00
   2.3117126e+01  -2.5338544e+01   4.0000000e+02  -3.2271762e-01  -9.2044426e-01  -3.5189114e+00
   2.3177977e+01  -2.5222939e+01   4.0000000e+02  -2.5678202e-01  -9.9305160e-01  -3.4972597e+00
   2.3212635e+01  -2.5098809e+01   4.0000000e+02  -1.5752241e-01  -1.1024954e+00  -3.4723736e+00
   2.3219844e+01  -2.4970944e+01   4.0000000e+02  -2.9220636e-02  -1.2443382e+00  -3.4384213e+00
   2.3199412e+01  -2.4844261e+01   4.0000000e+02   1.2235168e-01  -1.4124215e+00  -3.3887211e+00
   2.3152206e+01  -2.4723616e+01   4.0000000e+02   2.9033297e-01  -1.5989431e+00  -3.3173106e+00
   2.3080104e+01  -2.4613620e+01   4.0000000e+02   4.6741740e-01  -1.7947420e+00  -3.2205403e+00
   2.2985914e+01  -2.4518468e+01   4.0000000e+02   6.4656606e-01  -1.9898325e+00  -3.0983562e+00
   2.2873265e+01  -2.4441779e+01   4.0000000e+02   8.2156997e-01  -2.1741573e+00  -2.9549760e+00
   2.2746461e+01  -2.4386462e+01   4.0000000e+02   9.8730104e-01  -2.3384632e+00  -2.7988011e+00
   2.2610323e+01  -2.4354616e+01   4.0000000e+02   1.1395869e+00  -2.4751426e+00  -2.6415967e+00
   2.2470010e+01  -2.4347446e+01   4.0000000e+02   1.2748351e+00  -2.5789377e+00  -2.4970666e+00
   2.2330831e+01  -2.4365223e+01   4.0000000e+02   1.3895700e+00  -2.6473306e+00  -2.3790795e+00
   2.2198056e+01  -2.4407274e+01   4.0000000e+02   1.4800961e+00  -2.6805227e+00  -2.2997747e+00
   2.2076722e+01  -2.4472006e+01   4.0000000e+02   1.5424361e+00  -2.6809692e+00  -2.2678073e+00
   2.1971451e+01  -2.4556965e+01   4.0000000e+02   1.5725761e+00  -2.6525524e+00  -2.2870506e+00
   2.1886278e+01  -2.4658924e+01   4.0000000e+02   1.5669758e+00  -2.5996150e+00  -2.3560376e+00
   2.1824496e+01  -2.4774000e+01   4.0000000e+02   1.5232391e+00  -2.5261034e+00  -2.4682991e+00
   2.1788530e+01  -2.4897801e+01   4.0000000e+02   1.4407978e+00  -2.4350125e+00  -2.6135091e+00
   2.1779836e+01  -2.5025590e+01   4.0000000e+02   1.3214551e+00  -2.3282345e+00  -2.7790651e+00
   2.1798831e+01  -2.5152461e+01   4.0000000e+02   1.1696183e+00  -2.2068054e+00  -2.9517021e+00
   2.2206112e+01  -2.5734817e+01   4.0000000e+02   8.7107030e-02  -1.3558088e+00  -3.5584327e+00
   2.2344390e+01  -2.5768576e+01   4.0000000e+02  -8.2540764e-02  -1.1959723e+00  -3.5871474e+00
   2.2486994e+01  -2.5781239e+01   4.0000000e+02  -2.3061982e-01  -1.0481280e+00  -3.5932143e+00
   2.2629959e+01  -2.5772455e+01   4.0000000e+02  -3.5385177e-01  -9.1889794e-01  -3.5819990e+00
   2.2769312e+01  -2.5742469e+01   4.0000000e+02  -4.4984421e-01  -8.1416155e-01  -3.5595713e+00
   2.2901183e+01  -2.5692114e+01   4.0000000e+02  -5.1690050e-01  -7.3857955e-01  -3.5319518e+00
   2.3021922e+01  -2.5622788e+01   4.0000000e+02  -5.5387235e-01  -6.9535968e-01  -3.5043605e+00
   2.3128207e+01  -2.5536414e+01   4.0000000e+02  -5.6009455e-01  -6.8626739e-01  -3.4805494e+00
   2.3217130e+01  -2.5435380e+01   4.0000000e+02  -5.3541036e-01  -7.1180643e-01  -3.4623041e+00
   2.3286284e+01  -2.5322476e+01   4.0000000e+02  -4.8032006e-01  -7.7140407e-01  -3.4491607e+00
   2.3333824e+01  -2.5200810e+01   4.0000000e+02  -3.9616276e-01  -8.6354666e-01  -3.4384113e+00
   2.3358512e+01  -2.5073722e+01   4.0000000e+02  -2.8529419e-01  -9.8579459e-01  -3.4254181e+00
   2.3359744e+01  -2.4944688e+01   4.0000000e+02  -1.5116659e-01  -1.1347147e+00  -3.4042319e+00
   2.3337560e+01  -2.4817228e+01   4.0000000e+02   1.7463392e-03  -1.3057862e+00  -3.3684576e+00
   2.3292633e+01  -2.4694808e+01   4.0000000e+02   1.6822702e-01  -1.4933841e+00  -3.3122682e+00
   2.3226246e+01  -2.4580748e+01   4.0000000e+02   3.4274057e-01  -1.6908838e+00  -3.2314272e+00
   2.3140249e+01  -2.4478131e+01   4.0000000e+02   5.1993183e-01  -1.8909306e+00  -3.1241562e+00
   2.3037005e+01  -2.4389725e+01   4.0000000e+02   6.9505081e-01  -2.0858371e+00  -2.9917053e+00
   2.2919326e+01  -2.4317909e+01   4.0000000e+02   8.6420932e-01  -2.2680770e+00  -2.8385202e+00
   2.2790392e+01  -2.4264612e+01   4.0000000e+02   1.0244147e+00  -2.4308172e+00  -2.6719865e+00
   2.2653675e+01  -2.4231265e+01   4.0000000e+02   1.1733741e+00  -2.5684165e+00  -2.5018207e+00
   2.2512842e+01  -2.4218760e+01   4.0000000e+02   1.3091707e+00  -2.6768642e+00  -2.3391791e+00
   2.2371665e+01  -2.4227433e+01   4.0000000e+02   1.4298828e+00  -2.7540548e+00  -2.1956271e+00
   2.2233924e+01  -2.4257052e+01   4.0000000e+02   1.5332848e+00  -2.7998648e+00  -2.0820134e+00
   2.2103315e+01  -2.4306822e+01   4.0000000e+02   1.6166957e+00  -2.8159677e+00  -2.0073559e+00
   2.1983349e+01  -2.4375409e+01   4.0000000e+02   1.6770241e+00  -2.8053956e+00  -1.9778395e+00
   2.1877268e+01  -2.4460971e+01   4.0000000e+02   1.7109824e+00  -2.7719267e+00  -1.9960885e+00
   2.1787954e+01  -2.4561206e+01   4.0000000e+02   1.7154409e+00  -2.7194275e+00  -2.0608652e+00
   2.1717858e+01  -2.4673412e+01   4.0000000e+02   1.6878556e+00  -2.6512832e+00  -2.1673106e+00
   2.1668928e+01  -2.4794557e+01   4.0000000e+02   1.6267347e+00  -2.5700205e+00  -2.3076536e+00
   2.1642551e+01  -2.4921357e+01   4.0000000e+02   1.5320686e+00  -2.4771551e+00  -2.4722165e+00
   2.1639516e+01  -2.5050367e+01   4.0000000e+02   1.4056215e+00  -2.3732513e+00  -2.6504884e+00
   2.1659977e+01  -2.5178069e+01   4.0000000e+02   1.2510218e+00  -2.2581854e+00  -2.8320221e+00
   2.1703447e+01  -2.5300971e+01   4.0000000e+02   1.0735722e+00  -2.1315576e+00  -3.0071457e+00
   2.1768802e+01  -2.5415702e+01   4.0000000e+02   8.7983742e-01  -1.9932166e+00  -3.1674768e+00
   2.1854304e+01  -2.5519106e+01   4.0000000e+02   6.7709925e-01  -1.8438073e+00  -3.3063236e+00
   2.1957642e+01  -2.5608328e+01   4.0000000e+02   4.7279633e-01  -1.6852377e+00  -3.4190050e+00
   2.2075997e+01  -2.5680903e+01   4.0000000e+02   2.7401156e-01  -1.5209290e+00  -3.5030825e+00
   2.2817160e+01  -2.5862456e+01   4.0000000e+02  -6.4241206e-01  -6.4099578e-01  -3.4904274e+00
   2.2950195e+01  -2.5812714e+01   4.0000000e+02  -7.0813026e-01  -5.6182927e-01  -3.4552914e+00
   2.3073880e+01  -2.5746332e+01   4.0000000e+02  -7.4866472e-01  -5.1093649e-01  -3.4225463e+00
   2.3185665e+01  -2.5664687e+01   4.0000000e+02  -7.6351919e-01  -4.8965383e-01  -3.3957998e+00
   2.3283263e+01  -2.5569471e+01   4.0000000e+02  -7.5239355e-01  -4.9842856e-01  -3.3772163e+00
   2.3364693e+01  -2.5462651e+01   4.0000000e+02  -7.1525947e-01  -5.3702741e-01  -3.3672800e+00
   2.3428322e+01  -2.5346430e+01   4.0000000e+02  -6.5250619e-01  -6.0468172e-01  -3.3646934e+00
   2.3472896e+01  -2.5223196e+01   4.0000000e+02  -5.6510289e-01  -7.0015104e-01  -3.3664489e+00
   2.3497562e+01  -2.5095476e+01   4.0000000e+02  -4.5475629e-01  -8.2168228e-01  -3.3680777e+00
   2.3501877e+01  -2.4965878e+01   4.0000000e+02  -3.2399086e-01  -9.6691873e-01  -3.3640756e+00
   2.3485818e+01  -2.4837042e+01   4.0000000e+02  -1.7614222e-01  -1.1327726e+00  -3.3484664e+00
   2.3449774e+01  -2.4711583e+01   4.0000000e+02  -1.5199354e-02  -1.3153545e+00  -3.3154696e+00
   2.3394533e+01  -2.4592042e+01   4.0000000e+02   1.5446675e-01  -1.5099719e+00  -3.2602013e+00
   2.3321262e+01  -2.4480829e+01   4.0000000e+02   3.2845984e-01  -1.7112403e+00  -3.1793241e+00
   2.3231482e+01  -2.4380185e+01   4.0000000e+02   5.0270270e-01  -1.9132719e+00  -3.0715738e+00
   2.3127031e+01  -2.4292130e+01   4.0000000e+02   6.7373187e-01  -2.1099666e+00  -2.9380657e+00
   2.3010031e+01  -2.4218429e+01   4.0000000e+02   8.3884201e-01  -2.2953232e+00  -2.7823586e+00
   2.2882839e+01  -2.4160555e+01   4.0000000e+02   9.9609433e-01  -2.4637889e+00  -2.6102570e+00
   2.2748007e+01  -2.4119665e+01   4.0000000e+02   1.1441628e+00  -2.6105810e+00  -2.4294227e+00
   2.2608231e+01  -2.4096575e+01   4.0000000e+02   1.2820872e+00  -2.7319959e+00  -2.2488329e+00
   2.2466298e+01  -2.4091744e+01   4.0000000e+02   1.4089766e+00  -2.8256572e+00  -2.0781538e+00
   2.2325037e+01  -2.4105269e+01   4.0000000e+02   1.5237244e+00  -2.8906608e+00  -1.9270791e+00
   2.2187263e+01  -2.4136881e+01   4.0000000e+02   1.6248115e+00  -2.9275918e+00  -1.8046204e+00
   2.2055726e+01  -2.4185949e+01   4.0000000e+02   1.7102208e+00  -2.9383689e+00  -1.7183939e+00
   2.1933060e+01  -2.4251493e+01   4.0000000e+02   1.7774779e+00  -2.9259192e+00  -1.6739505e+00
   2.1821731e+01  -2.4332204e+01   4.0000000e+02   1.8238026e+00  -2.8937351e+00  -1.6742319e+00
   2.1723990e+01  -2.4426466e+01   4.0000000e+02   1.8463366e+00  -2.8453932e+00  -1.7192628e+00
   2.1641829e+01  -2.4532388e+01   4.0000000e+02   1.8424206e+00  -2.7841205e+00  -1.8061804e+00
   2.1576941e+01  -2.4647842e+01   4.0000000e+02   1.8099013e+00  -2.7124742e+00  -1.9296132e+00
   2.1530681e+01  -2.4770499e+01   4.0000000e+02   1.7474609e+00  -2.6321701e+00  -2.0823129e+00
   2.1504041e+01  -2.4897882e+01   4.0000000e+02   1.6549087e+00  -2.5440345e+00  -2.2559405e+00
   2.1497622e+01  -2.5027408e+01   4.0000000e+02   1.5334104e+00  -2.4480884e+00  -2.4417690e+00
   2.1511616e+01  -2.5156444e+01   4.0000000e+02   1.3855627e+00  -2.3437232e+00  -2.6312600e+00
   2.1545804e+01  -2.5282358e+01   4.0000000e+02   1.2152880e+00  -2.2299696e+00  -2.8164657e+00
   2.1599547e+01  -2.5402574e+01   4.0000000e+02   1.0275716e+00  -2.1058455e+00  -2.9902913e+00
   2.1671799e+01  -2.5514624e+01   4.0000000e+02   8.2808787e-01  -1.9707473e+00  -3.1467113e+00
   2.1761122e+01  -2.5616202e+01   4.0000000e+02   6.2279950e-01  -1.8248343e+00  -3.2809654e+00
   2.1865716e+01  -2.5705211e+01   4.0000000e+02   4.1759103e-01  -1.6693417e+00  -3.3897441e+00
   2.1983447e+01  -2.5779810e+01   4.0000000e+02   2.1796918e-01  -1.5067590e+00  -3.4713306e+00
   2.2111897e+01  -2.5838451e+01   4.0000000e+02   2.8833048e-02  -1.3408200e+00  -3.5256806e+00
   2.2248414e+01  -2.5879917e+01   4.0000000e+02  -1.4568099e-01  -1.1762954e+00  -3.5543918e+00
   2.2390166e+01  -2.5903346e+01   4.0000000e+02  -3.0225605e-01  -1.0186248e+00  -3.5605526e+00
   2.2534204e+01  -2.5908248e+01   4.0000000e+02  -4.3836641e-01  -8.7343773e-01  -3.5484673e+00
   2.2677529e+01  -2.5894523e+01   4.0000000e+02  -5.5218327e-01  -7.4604167e-01  -3.5232642e+00
   2.3395327e+01  -2.5648315e+01   4.0000000e+02  -9.4806865e-01  -3.0658176e-01  -3.2522268e+00
   2.3476438e+01  -2.5543687e+01   4.0000000e+02  -9.1363569e-01  -3.4182511e-01  -3.2478303e+00
   2.3542550e+01  -2.5430832e+01   4.0000000e+02  -8.5788857e-01  -4.0150590e-01  -3.2528958e+00
   2.3592694e+01  -2.5311479e+01   4.0000000e+02  -7.8122674e-01  -4.8483941e-01  -3.2651028e+00
   2.3626151e+01  -2.5187454e+01   4.0000000e+02  -6.8451519e-01  -5.9081807e-01  -3.2809770e+00
   2.3642464e+01  -2.5060648e+01   4.0000000e+02  -5.6918851e-01  -7.1813037e-01  -3.2961144e+00
   2.3641438e+01  -2.4932989e+01   4.0000000e+02  -4.3730022e-01  -8.6505615e-01  -3.3054941e+00
   2.3623142e+01  -2.4806410e+01   4.0000000e+02  -2.9149836e-01  -1.0293654e+00  -3.3038579e+00
   2.3587905e+01  -2.4682823e+01   4.0000000e+02  -1.3491702e-01  -1.2082466e+00  -3.2861380e+00
   2.3536306e+01  -2.4564089e+01   4.0000000e+02   2.9018993e-02  -1.3982972e+00  -3.2479049e+00
   2.3469165e+01  -2.4451993e+01   4.0000000e+02   1.9683302e-01  -1.5955702e+00  -3.1857958e+00
   2.3387527e+01  -2.4348212e+01   4.0000000e+02   3.6525720e-01  -1.7956936e+00  -3.0978747e+00
   2.3292645e+01  -2.4254297e+01   4.0000000e+02   5.3144623e-01  -1.9940232e+00  -2.9838875e+00
   2.3185961e+01  -2.4171648e+01   4.0000000e+02   6.9312861e-01  -2.1858339e+00  -2.8453709e+00
   2.3069082e+01  -2.4101496e+01   4.0000000e+02   8.4866558e-01  -2.3665235e+00  -2.6856104e+00
   2.2943759e+01  -2.4044881e+01   4.0000000e+02   9.9701327e-01  -2.5318210e+00  -2.5094582e+00
   2.2811860e+01  -2.4002644e+01   4.0000000e+02   1.1375975e+00  -2.6779828e+00  -2.3230621e+00
   2.2675344e+01  -2.3975411e+01   4.0000000e+02   1.2701303e+00  -2.8019895e+00  -2.1335240e+00
   2.2536233e+01  -2.3963584e+01   4.0000000e+02   1.3943922e+00  -2.9017181e+00  -1.9485331e+00
   2.2396586e+01  -2.3967339e+01   4.0000000e+02   1.5100158e+00  -2.9760714e+00  -1.7759948e+00
   2.2258470e+01  -2.3986621e+01   4.0000000e+02   1.6163127e+00  -3.0250510e+00  -1.6236319e+00
   2.2123927e+01  -2.4021143e+01   4.0000000e+02   1.7121697e+00  -3.0497378e+00  -1.4985546e+00
   2.1994955e+01  -2.4070395e+01   4.0000000e+02   1.7960125e+00  -3.0521509e+00  -1.4068425e+00
   2.1873472e+01  -2.4133646e+01   4.0000000e+02   1.8658636e+00  -3.0350162e+00  -1.3530859e+00
   2.1761292e+01  -2.4209958e+01   4.0000000e+02   1.9194490e+00  -3.0014473e+00  -1.3400167e+00
   2.1660100e+01  -2.4298196e+01   4.0000000e+02   1.9543460e+00  -2.9546087e+00  -1.3682499e+00
   2.1571427e+01  -2.4397046e+01   4.0000000e+02   1.9681537e+00  -2.8974049e+00  -1.4362288e+00
   2.1496626e+01  -2.4505033e+01   4.0000000e+02   1.9586798e+00  -2.8322449e+00  -1.5403918e+00
   2.1436852e+01  -2.4620542e+01   4.0000000e+02   1.9241426e+00  -2.7608945e+00  -1.6755526e+00
   2.1393044e+01  -2.4741841e+01   4.0000000e+02   1.8633871e+00  -2.6844156e+00  -1.8354123e+00
   2.1365907e+01  -2.4867105e+01   4.0000000e+02   1.7760961e+00  -2.6031775e+00  -2.0130936e+00
   2.1355902e+01  -2.4994445e+01   4.0000000e+02   1.6629488e+00  -2.5169184e+00  -2.2016184e+00
   2.1363232e+01  -2.5121935e+01   4.0000000e+02   1.5256977e+00  -2.4248600e+00  -2.3942401e+00
   2.1387842e+01  -2.5247641e+01   4.0000000e+02   1.3671186e+00  -2.3258627e+00  -2.5846634e+00
   2.1429408e+01  -2.5369649e+01   4.0000000e+02   1.1908561e+00  -2.2186356e+00  -2.7671519e+00
   2.1487346e+01  -2.5486095e+01   4.0000000e+02   1.0011752e+00  -2.1019781e+00  -2.9366245e+00
   2.1560817e+01  -2.5595198e+01   4.0000000e+02   8.0268072e-01  -1.9750446e+00  -3.0887460e+00
   2.1648732e+01  -2.5695281e+01   4.0000000e+02   6.0006945e-01  -1.8376121e+00  -3.2200231e+00
   2.1749773e+01  -2.5784802e+01   4.0000000e+02   3.9789910e-01  -1.6902865e+00  -3.3279337e+00
   2.1862409e+01  -2.5862380e+01   4.0000000e+02   2.0041215e-01  -1.5346354e+00  -3.4110290e+00
   2.1984918e+01  -2.5926814e+01   4.0000000e+02   1.1405609e-02  -1.3732143e+00  -3.4690051e+00
   2.2115417e+01  -2.5977106e+01   4.0000000e+02  -1.6587459e-01  -1.2094658e+00  -3.5027275e+00
   2.2251889e+01  -2.6012474e+01   4.0000000e+02  -3.2878235e-01  -1.0475186e+00  -3.5141884e+00
   2.2392219e+01  -2.6032368e+01   4.0000000e+02  -4.7528389e-01  -8.9188718e-01  -3.5063929e+00
   2.2534225e+01  -2.6036480e+01   4.0000000e+02  -6.0390672e-01  -7.4713112e-01  -3.4831699e+00
   2.2675699e+01  -2.6024745e+01   4.0000000e+02  -7.1364212e-01  -6.1751024e-01  -3.4489194e+00
   2.2814440e+01  -2.5997346e+01   4.0000000e+02  -8.0382251e-01  -5.0669175e-01  -3.4083085e+00
   2.2948295e+01  -2.5954709e+01   4.0000000e+02  -8.7399442e-01  -4.1755162e-01  -3.3659478e+00
   2.3075191e+01  -2.5897496e+01   4.0000000e+02  -9.2380779e-01  -3.5210369e-01  -3.3260725e+00
   2.3193172e+01  -2.5826595e+01   4.0000000e+02  -9.5295061e-01  -3.1154024e-01  -3.2922489e+00
   2.3300428e+01  -2.5743104e+01   4.0000000e+02  -9.6112299e-01  -2.9636907e-01  -3.2671248e+00
   2.3766996e+01  -2.5206421e+01   4.0000000e+02  -8.4602027e-01  -4.3571142e-01  -3.1754912e+00
   2.3783719e+01  -2.5078890e+01   4.0000000e+02  -7.3257377e-01  -5.6080033e-01  -3.2057520e+00
   2.3784834e+01  -2.4950467e+01   4.0000000e+02  -6.0393860e-01  -7.0382342e-01  -3.2318482e+00
   2.3770378e+01  -2.4822711e+01   4.0000000e+02  -4.6221761e-01  -8.6322530e-01  -3.2488831e+00
   2.3740574e+01  -2.4697168e+01   4.0000000e+02  -3.0996778e-01  -1.0369914e+00  -3.2520177e+00
   2.3695825e+01  -2.4575353e+01   4.0000000e+02  -1.5006662e-01  -1.2226136e+00  -3.2367953e+00
   2.3636712e+01  -2.4458730e+01   4.0000000e+02   1.4467440e-02  -1.4171001e+00  -3.1994668e+00
   2.3563983e+01  -2.4348698e+01   4.0000000e+02   1.8068081e-01  -1.6170338e+00  -3.1372969e+00
   2.3478542e+01  -2.4246574e+01   4.0000000e+02   3.4588485e-01  -1.8186725e+00  -3.0488115e+00
   2.3381437e+01  -2.4153577e+01   4.0000000e+02   5.0781816e-01  -2.0180767e+00  -2.9339556e+00
   2.3273847e+01  -2.4070813e+01   4.0000000e+02   6.6475029e-01  -2.2112499e+00  -2.7941441e+00
   2.3157070e+01  -2.3999268e+01   4.0000000e+02   8.1551107e-01  -2.3942752e+00  -2.6322100e+00
   2.3032504e+01  -2.3939789e+01   4.0000000e+02   9.5946466e-01  -2.5634697e+00  -2.4522452e+00
   2.2901635e+01  -2.3893081e+01   4.0000000e+02   1.0964059e+00  -2.7155150e+00  -2.2593971e+00
   2.2766016e+01  -2.3859698e+01   4.0000000e+02   1.2264207e+00  -2.8476019e+00  -2.0596212e+00
   2.2627254e+01  -2.3840034e+01   4.0000000e+02   1.3497082e+00  -2.9575654e+00  -1.8594318e+00
   2.2486990e+01  -2.3834322e+01   4.0000000e+02   1.4663994e+00  -3.0440087e+00  -1.6656596e+00
   2.2346878e+01  -2.3842629e+01   4.0000000e+02   1.5763938e+00  -3.1064058e+00  -1.4851977e+00
   2.2208576e+01  -2.3864856e+01   4.0000000e+02   1.6792255e+00  -3.1451439e+00  -1.3247551e+00
   2.2073717e+01  -2.3900742e+01   4.0000000e+02   1.7740023e+00  -3.1615036e+00  -1.1905590e+00
   2.1943900e+01  -2.3949862e+01   4.0000000e+02   1.8593924e+00  -3.1575476e+00  -1.0880375e+00
   2.1820668e+01  -2.4011634e+01   4.0000000e+02   1.9336786e+00  -3.1359256e+00  -1.0214777e+00
   2.1705490e+01  -2.4085325e+01   4.0000000e+02   1.9948504e+00  -3.0996174e+00  -9.9370321e-01
   2.1599747e+01  -2.4170063e+01   4.0000000e+02   2.0407157e+00  -3.0516502e+00  -1.0058390e+00
   2.1504717e+01  -2.4264838e+01   4.0000000e+02   2.0690242e+00  -2.9948467e+00  -1.0571785e+00
   2.1421556e+01  -2.4368522e+01   4.0000000e+02   2.0775943e+00  -2.9316157e+00  -1.1452530e+00
   2.1351286e+01  -2.4479876e+01   4.0000000e+02   2.0644491e+00  -2.8638232e+00  -1.2660586e+00
   2.1294783e+01  -2.4597569e+01   4.0000000e+02   2.0279678e+00  -2.7927269e+00  -1.4144466e+00
   2.1252763e+01  -2.4720187e+01   4.0000000e+02   1.9670627e+00  -2.7189727e+00  -1.5845554e+00
   2.1225776e+01  -2.4846255e+01   4.0000000e+02   1.8813459e+00  -2.6426207e+00  -1.7702606e+00
   2.1214194e+01  -2.4974252e+01   4.0000000e+02   1.7712721e+00  -2.5632048e+00  -1.9655112e+00
   2.1218203e+01  -2.5102628e+01   4.0000000e+02   1.6382111e+00  -2.4798144e+00  -2.1645512e+00
   2.1237805e+01  -2.5229823e+01   4.0000000e+02   1.4844177e+00  -2.3912004e+00  -2.3620449e+00
   2.1272810e+01  -2.5354289e+01   4.0000000e+02   1.3129080e+00  -2.2959139e+00  -2.5531120e+00
   2.1322835e+01  -2.5474505e+01   4.0000000e+02   1.1272694e+00  -2.1924819e+00  -2.7333376e+00
   2.1387313e+01  -2.5588997e+01   4.0000000e+02   9.3142969e-01  -2.0796029e+00  -2.8988120e+00
   2.1465492e+01  -2.5696358e+01   4.0000000e+02   7.2944255e-01  -1.9563578e+00  -3.0461830e+00
   2.1556443e+01  -2.5795263e+01   4.0000000e+02   5.2531061e-01  -1.8224094e+00  -3.1727399e+00
   2.1659074e+01  -2.5884489e+01   4.0000000e+02   3.2283852e-01  -1.6781566e+00  -3.2765140e+00
   2.1772138e+01  -2.5962932e+01   4.0000000e+02   1.2552705e-01  -1.5248326e+00  -3.3563593e+00
   2.1894251e+01  -2.6029616e+01   4.0000000e+02  -6.3506432e-02  -1.3645241e+00  -3.4120188e+00
   2.2023907e+01  -2.6083711e+01   4.0000000e+02  -2.4160165e-01  -1.2001028e+00  -3.4441576e+00
   2.2159501e+01  -2.6124543e+01   4.0000000e+02  -4.0660227e-01  -1.0350747e+00  -3.4543561e+00
   2.2299346e+01  -2.6151603e+01   4.0000000e+02  -5.5686576e-01  -8.7336807e-01  -3.4450542e+00
   2.2441699e+01  -2.6164552e+01   4.0000000e+02  -6.9123632e-01  -7.1907076e-01  -3.4194451e+00
   2.2584779e+01  -2.6163228e+01   4.0000000e+02  -8.0897584e-01  -5.7615287e-01  -3.3813133e+00
   2.2726800e+01  -2.6147648e+01   4.0000000e+02  -9.0967170e-01  -4.4819485e-01  -3.3348238e+00
   2.2865988e+01  -2.6118006e+01   4.0000000e+02  -9.9311483e-01  -3.3818576e-01  -3.2842869e+00
   2.3000608e+01  -2.6074673e+01   4.0000000e+02  -1.0591964e+00  -2.4838979e-01  -3.2339078e+00
   2.3128985e+01  -2.6018190e+01   4.0000000e+02  -1.1078151e+00  -1.8032004e-01  -3.1875529e+00
   2.3249532e+01  -2.5949261e+01   4.0000000e+02  -1.1388265e+00  -1.3479541e-01  -3.1485317e+00
   2.3360764e+01  -2.5868743e+01   4.0000000e+02  -1.1520156e+00  -1.1207908e-01  -3.1194200e+00
   2.3461321e+01  -2.5777637e+01   4.0000000e+02  -1.1471171e+00  -1.1203602e-01  -3.1019054e+00
   2.3549984e+01  -2.5677070e+01   4.0000000e+02  -1.1238556e+00  -1.3429603e-01  -3.0966812e+00
   2.3625690e+01  -2.5568286e+01   4.0000000e+02  -1.0820234e+00  -1.7836739e-01  -3.1033753e+00
   2.3687542e+01  -2.5452625e+01   4.0000000e+02  -1.0215676e+00  -2.4370744e-01  -3.1205433e+00
   2.3734822e+01  -2.5331509e+01   4.0000000e+02  -9.4270396e-01  -3.2972002e-01  -3.1457111e+00
   2.3875586e+01  -2.4659982e+01   4.0000000e+02  -4.1656196e-01  -9.4476703e-01  -3.2036937e+00
   2.3830879e+01  -2.4537575e+01   4.0000000e+02  -2.5851632e-01  -1.1292618e+00  -3.2022607e+00
   2.3773097e+01  -2.4419804e+01   4.0000000e+02  -9.6375826e-02  -1.3225228e+00  -3.1792816e+00
   2.3702841e+01  -2.4307823e+01   4.0000000e+02   6.7231662e-02  -1.5217407e+00  -3.1319739e+00
   2.3620832e+01  -2.4202727e+01   4.0000000e+02   2.2987897e-01  -1.7238011e+00  -3.0585700e+00
   2.3527895e+01  -2.4105543e+01   4.0000000e+02   3.8948913e-01  -1.9253851e+00  -2.9584637e+00
   2.3424960e+01  -2.4017218e+01   4.0000000e+02   5.4442829e-01  -2.1230654e+00  -2.8322769e+00
   2.3313046e+01  -2.3938609e+01   4.0000000e+02   6.9356438e-01  -2.3134196e+00  -2.6818382e+00
   2.3193253e+01  -2.3870480e+01   4.0000000e+02   8.3626227e-01  -2.4931252e+00  -2.5100906e+00
   2.3066752e+01  -2.3813490e+01   4.0000000e+02   9.7233715e-01  -2.6590630e+00  -2.3209355e+00
   2.2934774e+01  -2.3768190e+01   4.0000000e+02   1.1019619e+00  -2.8084131e+00  -2.1190533e+00
   2.2798599e+01  -2.3735020e+01   4.0000000e+02   1.2255419e+00  -2.9387533e+00  -1.9097213e+00
   2.2659544e+01  -2.3714297e+01   4.0000000e+02   1.3435706e+00  -3.0481724e+00  -1.6986259e+00
   2.2518950e+01  -2.3706224e+01   4.0000000e+02   1.4564745e+00  -3.1353649e+00  -1.4917188e+00
   2.2378173e+01  -2.3710877e+01   4.0000000e+02   1.5644693e+00  -3.1997331e+00  -1.2950515e+00
   2.2238571e+01  -2.3728212e+01   4.0000000e+02   1.6674444e+00  -3.2414474e+00  -1.1146269e+00
   2.2101491e+01  -2.3758062e+01   4.0000000e+02   1.7648913e+00  -3.2614653e+00  -9.5620838e-01
   2.1968257e+01  -2.3800137e+01   4.0000000e+02   1.8558805e+00  -3.2614817e+00  -8.2509494e-01
   2.1840160e+01  -2.3854033e+01   4.0000000e+02   1.9390874e+00  -3.2437989e+00  -7.2587844e-01
   2.1718445e+01  -2.3919227e+01   4.0000000e+02   2.0128593e+00  -3.2111434e+00  -6.6214548e-01
   2.1604300e+01  -2.3995088e+01   4.0000000e+02   2.0753036e+00  -3.1664312e+00  -6.3622408e-01
   2.1498847e+01  -2.4080881e+01   4.0000000e+02   2.1243824e+00  -3.1125329e+00  -6.4897675e-01
   2.1403126e+01  -2.4175771e+01   4.0000000e+02   2.1580073e+00  -3.0520674e+00  -6.9968562e-01
   2.1318092e+01  -2.4278837e+01   4.0000000e+02   2.1741206e+00  -2.9872424e+00  -7.8611993e-01
   2.1244599e+01  -2.4389071e+01   4.0000000e+02   2.1707937e+00  -2.9197663e+00  -9.0469588e-01
   2.1183398e+01  -2.4505397e+01   4.0000000e+02   2.1463293e+00  -2.8508046e+00  -1.0508242e+00
   2.1135123e+01  -2.4626673e+01   4.0000000e+02   2.0994007e+00  -2.7809882e+00  -1.2192668e+00
   2.1100284e+01  -2.4751708e+01   4.0000000e+02   2.0291991e+00  -2.7104379e+00  -1.4045324e+00
   2.1079268e+01  -2.4879269e+01   4.0000000e+02   1.9355764e+00  -2.6388095e+00  -1.6011967e+00
   2.1072323e+01  -2.5008094e+01   4.0000000e+02   1.8191569e+00  -2.5653445e+00  -1.8040999e+00
   2.1079564e+01  -2.5136907e+01   4.0000000e+02   1.6813654e+00  -2.4889316e+00  -2.0084707e+00
   2.1100962e+01  -2.5264425e+01   4.0000000e+02   1.5243875e+00  -2.4081922e+00  -2.2099231e+00
   2.1136349e+01  -2.5389375e+01   4.0000000e+02   1.3510339e+00  -2.3215827e+00  -2.4044500e+00
   2.1185413e+01  -2.5510507e+01   4.0000000e+02   1.1645603e+00  -2.2275260e+00  -2.5883905e+00
   2.1247702e+01  -2.5626604e+01   4.0000000e+02   9.6847317e-01  -2.1245669e+00  -2.7584318e+00
   2.1322627e+01  -2.5736496e+01   4.0000000e+02   7.6634992e-01  -2.0115379e+00  -2.9116491e+00
   2.1409465e+01  -2.5839073e+01   4.0000000e+02   5.6169851e-01  -1.8877218e+00  -3.0455684e+00
   2.1507366e+01  -2.5933295e+01   4.0000000e+02   3.5785945e-01  -1.7529947e+00  -3.1582454e+00
   2.1615363e+01  -2.6018206e+01   4.0000000e+02   1.5792847e-01  -1.6079232e+00  -3.2483447e+00
   2.1732377e+01  -2.6092940e+01   4.0000000e+02  -3.5291713e-02  -1.4538184e+00  -3.3151997e+00
   2.1857230e+01  -2.6156734e+01   4.0000000e+02  -2.1935087e-01  -1.2927197e+00  -3.3588646e+00
   2.1988659e+01  -2.6208937e+01   4.0000000e+02  -3.9220100e-01  -1.1273183e+00  -3.3801401e+00
   2.2125326e+01  -2.6249014e+01   4.0000000e+02  -5.5222287e-01  -9.6083382e-01  -3.3805748e+00
   2.2265835e+01  -2.6276554e+01   4.0000000e+02  -6.9823959e-01  -7.9683265e-01  -3.3624331e+00
   2.2408747e+01  -2.6291274e+01   4.0000000e+02  -8.2949101e-01  -6.3901778e-01  -3.3286220e+00
   2.2552596e+01  -2.6293022e+01   4.0000000e+02  -9.4557495e-01  -4.9100115e-01  -3.2825739e+00
   2.2695905e+01  -2.6281782e+01   4.0000000e+02  -1.0463653e+00  -3.5608069e-01  -3.2280859e+00
   2.2837204e+01  -2.6257668e+01   4.0000000e+02  -1.1319056e+00  -2.3705788e-01  -3.1691381e+00
   2.2975043e+01  -2.6220927e+01   4.0000000e+02  -1.2023129e+00  -1.3611018e-01  -3.1096943e+00
   2.3108015e+01  -2.6171938e+01   4.0000000e+02  -1.2577004e+00  -5.4731759e-02  -3.0535030e+00
   2.3234764e+01  -2.6111201e+01   4.0000000e+02  -1.2981033e+00   6.2239702e-03  -3.0039357e+00
   2.3354006e+01  -2.6039339e+01   4.0000000e+02  -1.3234582e+00   4.6460259e-02  -2.9638245e+00
   2.3464538e+01  -2.5957085e+01   4.0000000e+02  -1.3335874e+00   6.6086256e-02  -2.9353475e+00
   2.3565255e+01  -2.5865276e+01   4.0000000e+02  -1.3282219e+00   6.5468607e-02  -2.9199221e+00
   2.3655157e+01  -2.5764847e+01   4.0000000e+02  -1.3070407e+00   4.5091784e-02  -2.9181300e+00
   2.3733362e+01  -2.5656816e+01   4.0000000e+02  -1.2697247e+00   5.4539601e-03  -2.9296723e+00
   2.3799113e+01  -2.5542275e+01   4.0000000e+02  -1.2160314e+00  -5.2986672e-02  -2.9533569e+00
   2.3851784e+01  -2.5422380e+01   4.0000000e+02  -1.1458812e+00  -1.2981591e-01  -2.9871270e+00
   2.3890885e+01  -2.5298334e+01   4.0000000e+02  -1.0594469e+00  -2.2463050e-01  -3.0281372e+00
   2.3916068e+01  -2.5171383e+01   4.0000000e+02  -9.5725464e-01  -3.3695678e-01  -3.0728582e+00
   2.3927125e+01  -2.5042792e+01   4.0000000e+02  -8.4024366e-01  -4.6617628e-01  -3.1172355e+00
   2.3923990e+01  -2.4913844e+01   4.0000000e+02  -7.0981967e-01  -6.1141755e-01  -3.1568596e+00
   2.3906739e+01  -2.4785818e+01   4.0000000e+02  -5.6784091e-01  -7.7148006e-01  -3.1871728e+00
   2.3728573e+01  -2.4121189e+01   4.0000000e+02   1.7449962e-01  -1.7051159e+00  -3.0350636e+00
   2.3635549e+01  -2.4023575e+01   4.0000000e+02   3.3001338e-01  -1.9067957e+00  -2.9400150e+00
   2.3533333e+01  -2.3934023e+01   4.0000000e+02   4.8062194e-01  -2.1052724e+00  -2.8186998e+00
   2.3422770e+01  -2.3853255e+01   4.0000000e+02   6.2536115e-01  -2.2975624e+00  -2.6726043e+00
   2.3304766e+01  -2.3781924e+01   4.0000000e+02   7.6371612e-01  -2.4807399e+00  -2.5041590e+00
   2.3180283e+01  -2.3720604e+01   4.0000000e+02   8.9559084e-01  -2.6520097e+00  -2.3166084e+00
   2.3050332e+01  -2.3669791e+01   4.0000000e+02   1.0212427e+00  -2.8087690e+00  -2.1138680e+00
   2.2915960e+01  -2.3629891e+01   4.0000000e+02   1.1411973e+00  -2.9486906e+00  -1.9003576e+00
   2.2778251e+01  -2.3601225e+01   4.0000000e+02   1.2561252e+00  -3.0697851e+00  -1.6808853e+00
   2.2638311e+01  -2.3584025e+01   4.0000000e+02   1.3667210e+00  -3.1704937e+00  -1.4605255e+00
   2.2497262e+01  -2.3578427e+01   4.0000000e+02   1.4735711e+00  -3.2497815e+00  -1.2445173e+00
   2.2356235e+01  -2.3584476e+01   4.0000000e+02   1.5770331e+00  -3.3072170e+00  -1.0381870e+00
   2.2216360e+01  -2.3602125e+01   4.0000000e+02   1.6771419e+00  -3.3430379e+00  -8.4684846e-01
   2.2078760e+01  -2.3631230e+01   4.0000000e+02   1.7735480e+00  -3.3581797e+00  -6.7567570e-01
   2.1944540e+01  -2.3671560e+01   4.0000000e+02   1.8655026e+00  -3.3542387e+00  -5.2955552e-01
   2.1814781e+01  -2.3722789e+01   4.0000000e+02   1.9518791e+00  -3.3333832e+00  -4.1287321e-01
   2.1690531e+01  -2.3784506e+01   4.0000000e+02   2.0312330e+00  -3.2981945e+00  -3.2929318e-01
   2.1572798e+01  -2.3856215e+01   4.0000000e+02   2.1018787e+00  -3.2514730e+00  -2.8151250e-01
   2.1462542e+01  -2.3937336e+01   4.0000000e+02   2.1619727e+00  -3.1960305e+00  -2.7103671e-01
   2.1360668e+01  -2.4027215e+01   4.0000000e+02   2.2095882e+00  -3.1344945e+00  -2.9804102e-01
   2.1268016e+01  -2.4125126e+01   4.0000000e+02   2.2427802e+00  -3.0691574e+00  -3.6131089e-01
   2.1185358e+01  -2.4230273e+01   4.0000000e+02   2.2596398e+00  -3.0018797e+00  -4.5831813e-01
   2.1113392e+01  -2.4341804e+01   4.0000000e+02   2.2583557e+00  -2.9340402e+00  -5.8544206e-01
   2.1052731e+01  -2.4458811e+01   4.0000000e+02   2.2372994e+00  -2.8665337e+00  -7.3824552e-01
   2.1003903e+01  -2.4580337e+01   4.0000000e+02   2.1951340e+00  -2.7997939e+00  -9.1183068e-01
   2.0967340e+01  -2.4705388e+01   4.0000000e+02   2.1309469e+00  -2.7338240e+00  -1.1011727e+00
   2.0943381e+01  -2.4832937e+01   4.0000000e+02   2.0443846e+00  -2.6682362e+00  -1.3013929e+00
   2.0932261e+01  -2.4961935e+01   4.0000000e+02   1.9357635e+00  -2.6022880e+00  -1.5079242e+00
   2.0934113e+01  -2.5091316e+01   4.0000000e+02   1.8061247e+00  -2.5349263e+00  -1.7165850e+00
   2.0948962e+01  -2.5220008e+01   4.0000000e+02   1.6572145e+00  -2.4648384e+00  -1.9235690e+00
   2.0976725e+01  -2.5346941e+01   4.0000000e+02   1.4913894e+00  -2.3905210e+00  -2.1253952e+00
   2.1017212e+01  -2.5471057e+01   4.0000000e+02   1.3114622e+00  -2.3103676e+00  -2.3188559e+00
   2.1070124e+01  -2.5591318e+01   4.0000000e+02   1.1205269e+00  -2.2227790e+00  -2.5009784e+00
   2.1135052e+01  -2.5706714e+01   4.0000000e+02   9.2179258e-01  -2.1262913e+00  -2.6690271e+00
   2.1211486e+01  -2.5816275e+01   4.0000000e+02   7.1843818e-01  -2.0197066e+00  -2.8205530e+00
   2.1298812e+01  -2.5919076e+01   4.0000000e+02   5.1352692e-01  -1.9022301e+00  -2.9534420e+00
   2.1396318e+01  -2.6014246e+01   4.0000000e+02   3.0994620e-01  -1.7735835e+00  -3.0659869e+00
   2.1503202e+01  -2.6100978e+01   4.0000000e+02   1.1036572e-01  -1.6340866e+00  -3.1569530e+00
   2.1618575e+01  -2.6178534e+01   4.0000000e+02  -8.2788825e-02  -1.4847049e+00  -3.2256280e+00
   2.1741470e+01  -2.6246251e+01   4.0000000e+02  -2.6737201e-01  -1.3270492e+00  -3.2718692e+00
   2.1870849e+01  -2.6303553e+01   4.0000000e+02  -4.4156774e-01  -1.1633268e+00  -3.2961338e+00
   2.2005615e+01  -2.6349947e+01   4.0000000e+02  -6.0391538e-01  -9.9625914e-01  -3.2995049e+00
   2.2144619e+01  -2.6385037e+01   4.0000000e+02  -7.5334447e-01  -8.2895247e-01  -3.2836880e+00
   2.2286673e+01  -2.6408521e+01   4.0000000e+02  -8.8916456e-01  -6.6474442e-01  -3.2509891e+00
   2.2430558e+01  -2.6420198e+01   4.0000000e+02  -1.0110362e+00  -5.0702484e-01  -3.2042503e+00
   2.2575040e+01  -2.6419967e+01   4.0000000e+02  -1.1189098e+00  -3.5904394e-01  -3.1467516e+00
   2.2718877e+01  -2.6407830e+01   4.0000000e+02  -1.2129430e+00  -2.2373351e-01  -3.0820748e+00
   2.2860835e+01  -2.6383891e+01   4.0000000e+02  -1.2934130e+00  -1.0355008e-01  -3.0139449e+00
   2.2999697e+01  -2.6348357e+01   4.0000000e+02  -1.3606295e+00  -3.7184163e-04  -2.9460623e+00
   2.3134275e+01  -2.6301531e+01   4.0000000e+02  -1.4148561e+00   8.4538558e-02  -2.8819501e+00
   2.3263423e+01  -2.6243816e+01   4.0000000e+02  -1.4562667e+00   1.5051514e-01  -2.8248027e+00
   2.3386045e+01  -2.6175706e+01   4.0000000e+02  -1.4849075e+00   1.9739628e-01  -2.7773758e+00
   2.3501106e+01  -2.6097781e+01   4.0000000e+02  -1.5006887e+00   2.2539939e-01  -2.7418896e+00
   2.3607643e+01  -2.6010708e+01   4.0000000e+02  -1.5034022e+00   2.3498542e-01  -2.7199406e+00
   2.3704769e+01  -2.5915227e+01   4.0000000e+02  -1.4927354e+00   2.2671326e-01  -2.7124545e+00
   2.3791685e+01  -2.5812147e+01   4.0000000e+02  -1.4683145e+00   2.0113717e-01  -2.7196322e+00
   2.3867684e+01  -2.5702342e+01   4.0000000e+02  -1.4297547e+00   1.5873690e-01  -2.7409255e+00
   2.3932155e+01  -2.5586739e+01   4.0000000e+02  -1.3767152e+00   9.9883441e-02  -2.7750443e+00
   2.3984591e+01  -2.5466309e+01   4.0000000e+02  -1.3089733e+00   2.4850186e-02  -2.8199848e+00
   2.4024590e+01  -2.5342065e+01   4.0000000e+02  -1.2265078e+00  -6.6141353e-02  -2.8730875e+00
   2.4051855e+01  -2.5215044e+01   4.0000000e+02  -1.1295690e+00  -1.7286767e-01  -2.9311362e+00
   2.4066201e+01  -2.5086305e+01   4.0000000e+02  -1.0187623e+00  -2.9501279e-01  -2.9904561e+00
   2.4067549e+01  -2.4956919e+01   4.0000000e+02  -8.9509077e-01  -4.3209033e-01  -3.0470490e+00
   2.4055928e+01  -2.4827958e+01   4.0000000e+02  -7.5997102e-01  -5.8336418e-01  -3.0967331e+00
   2.4031475e+01  -2.4700486e+01   4.0000000e+02  -6.1520847e-01  -7.4778219e-01  -3.1352994e+00
   2.3994430e+01  -2.4575552e+01   4.0000000e+02  -4.6292578e-01  -9.2393409e-01  -3.1586863e+00
   2.3945134e+01  -2.4454183e+01   4.0000000e+02  -3.0545649e-01  -1.1100343e+00  -3.1631691e+00
   2.3884024e+01  -2.4337372e+01   4.0000000e+02  -1.4520565e-01  -1.3039432e+00  -3.1455572e+00
   2.3811632e+01  -2.4226071e+01   4.0000000e+02   1.5489609e-02  -1.5032057e+00  -3.1033825e+00
   2.3375689e+01  -2.3671439e+01   4.0000000e+02   7.3135270e-01  -2.5244472e+00  -2.4444598e+00
   2.3252789e+01  -2.3610399e+01   4.0000000e+02   8.5497085e-01  -2.6935655e+00  -2.2565431e+00
   2.3124911e+01  -2.3558757e+01   4.0000000e+02   9.7271871e-01  -2.8496290e+00  -2.0532511e+00
   2.2992907e+01  -2.3516857e+01   4.0000000e+02   1.0852047e+00  -2.9905841e+00  -1.8383097e+00
   2.2857652e+01  -2.3484975e+01   4.0000000e+02   1.1931946e+00  -3.1146163e+00  -1.6157203e+00
   2.2720038e+01  -2.3463321e+01   4.0000000e+02   1.2975116e+00  -3.2202090e+00  -1.3896863e+00
   2.2580974e+01  -2.3452037e+01   4.0000000e+02   1.3989270e+00  -3.3062124e+00  -1.1645630e+00
   2.2441376e+01  -2.3451200e+01   4.0000000e+02   1.4980600e+00  -3.3719216e+00  -9.4481538e-01
   2.2302165e+01  -2.3460813e+01   4.0000000e+02   1.5952829e+00  -3.4171549e+00  -7.3496717e-01
   2.2164258e+01  -2.3480814e+01   4.0000000e+02   1.6906540e+00  -3.4423038e+00  -5.3955521e-01
   2.2028563e+01  -2.3511070e+01   4.0000000e+02   1.7838766e+00  -3.4483580e+00  -3.6303884e-01
   2.1895979e+01  -2.3551382e+01   4.0000000e+02   1.8742898e+00  -3.4368760e+00  -2.0970186e-01
   2.1767383e+01  -2.3601484e+01   4.0000000e+02   1.9609002e+00  -3.4099093e+00  -8.3483070e-02
   2.1643629e+01  -2.3661045e+01   4.0000000e+02   2.0424316e+00  -3.3698733e+00   1.2201166e-02
   2.1525543e+01  -2.3729670e+01   4.0000000e+02   2.1173944e+00  -3.3193845e+00   7.4661876e-02
   2.1413916e+01  -2.3806904e+01   4.0000000e+02   2.1841577e+00  -3.2610831e+00   1.0213414e-01
   2.1309500e+01  -2.3892235e+01   4.0000000e+02   2.2410116e+00  -3.1974667e+00   9.3933673e-02
   2.1213003e+01  -2.3985096e+01   4.0000000e+02   2.2862143e+00  -3.1307561e+00   5.0549458e-02
   2.1125086e+01  -2.4084868e+01   4.0000000e+02   2.3180263e+00  -3.0628044e+00  -2.6361817e-02
   2.1046355e+01  -2.4190885e+01   4.0000000e+02   2.3347420e+00  -2.9950500e+00  -1.3408048e-01
   2.0977359e+01  -2.4302438e+01   4.0000000e+02   2.3347279e+00  -2.9285089e+00  -2.6903125e-01
   2.0918587e+01  -2.4418778e+01   4.0000000e+02   2.3164839e+00  -2.8637939e+00  -4.2705298e-01
   2.0870461e+01  -2.4539125e+01   4.0000000e+02   2.2787331e+00  -2.8011428e+00  -6.0369930e-01
   2.0833338e+01  -2.4662665e+01   4.0000000e+02   2.2205366e+00  -2.7404560e+00  -7.9450640e-01
   2.0807500e+01  -2.4788566e+01   4.0000000e+02   2.1414120e+00  -2.6813201e+00  -9.9521948e-01
   2.0793157e+01  -2.4915972e+01   4.0000000e+02   2.0414431e+00  -2.6230409e+00  -1.2019105e+00
   2.0790442e+01  -2.5044017e+01   4.0000000e+02   1.9213390e+00  -2.5646656e+00  -1.4110357e+00
   2.0799410e+01  -2.5171828e+01   4.0000000e+02   1.7824379e+00  -2.5050156e+00  -1.6194069e+00
   2.0820036e+01  -2.5298531e+01   4.0000000e+02   1.6266452e+00  -2.4427280e+00  -1.8241251e+00
   2.0852214e+01  -2.5423255e+01   4.0000000e+02   1.4563181e+00  -2.3763110e+00  -2.0225052e+00
   2.0895760e+01  -2.5545142e+01   4.0000000e+02   1.2741093e+00  -2.3042122e+00  -2.2120317e+00
   2.0950406e+01  -2.5663350e+01   4.0000000e+02   1.0828192e+00  -2.2249071e+00  -2.3903217e+00
   2.1015807e+01  -2.5777060e+01   4.0000000e+02   8.8525928e-01  -2.1369951e+00  -2.5551489e+00
   2.1091539e+01  -2.5885481e+01   4.0000000e+02   6.8415981e-01  -2.0393056e+00  -2.7044753e+00
   2.1177102e+01  -2.5987858e+01   4.0000000e+02   4.8211011e-01  -1.9309981e+00  -2.8365066e+00
   2.1271924e+01  -2.6083476e+01   4.0000000e+02   2.8153456e-01  -1.8116527e+00  -2.9497458e+00
   2.1375364e+01  -2.6171663e+01   4.0000000e+02   8.4685797e-02  -1.6813402e+00  -3.0430407e+00
   2.1486712e+01  -2.6251800e+01   4.0000000e+02  -1.0637125e-01  -1.5406629e+00  -3.1156218e+00
   2.1605202e+01  -2.6323323e+01   4.0000000e+02  -2.8978123e-01  -1.3907604e+00  -3.1671436e+00
   2.1730011e+01  -2.6385727e+01   4.0000000e+02  -4.6392644e-01  -1.2332928e+00  -3.1977102e+00
   2.1860266e+01  -2.6438570e+01   4.0000000e+02  -6.2746548e-01  -1.0703900e+00  -3.2079070e+00
   2.1995052e+01  -2.6481479e+01   4.0000000e+02  -7.7937118e-01  -9.0457222e-01  -3.1988222e+00
   2.2133419e+01  -2.6514149e+01   4.0000000e+02  -9.1894287e-01  -7.3865159e-01  -3.1720586e+00
   2.2274388e+01  -2.6536348e+01   4.0000000e+02  -1.0458042e+00  -5.7560931e-01  -3.1297193e+00
   2.2416960e+01  -2.6547918e+01   4.0000000e+02  -1.1598725e+00  -4.1845502e-01  -3.0743653e+00
   2.2560121e+01  -2.6548777e+01   4.0000000e+02  -1.2613038e+00  -2.7007941e-01  -3.0089396e+00
   2.2702855e+01  -2.6538919e+01   4.0000000e+02  -1.3504265e+00  -1.3310216e-01  -2.9366603e+00
   2.2844148e+01  -2.6518414e+01   4.0000000e+02  -1.4276615e+00  -9.7467322e-03  -2.8608939e+00
   2.2982999e+01  -2.6487408e+01   4.0000000e+02  -1.4934509e+00   9.8258076e-02  -2.7850169e+00
   2.3118424e+01  -2.6446121e+01   4.0000000e+02  -1.5481904e+00   1.8972135e-01  -2.7122880e+00
   2.3249467e+01  -2.6394845e+01   4.0000000e+02  -1.5921829e+00   2.6398729e-01  -2.6457288e+00
   2.3375208e+01  -2.6333945e+01   4.0000000e+02  -1.6256121e+00   3.2088151e-01  -2.5880215e+00
   2.3494767e+01  -2.6263850e+01   4.0000000e+02  -1.6485208e+00   3.6060695e-01  -2.5414429e+00
   2.3607312e+01  -2.6185057e+01   4.0000000e+02  -1.6608210e+00   3.8363181e-01  -2.5077934e+00
   2.3712068e+01  -2.6098119e+01   4.0000000e+02  -1.6623006e+00   3.9056143e-01  -2.4883558e+00
   2.3808315e+01  -2.6003648e+01   4.0000000e+02  -1.6526465e+00   3.8202775e-01  -2.4838573e+00
   2.3895402e+01  -2.5902307e+01   4.0000000e+02  -1.6314760e+00   3.5860743e-01  -2.4944341e+00
   2.3972745e+01  -2.5794804e+01   4.0000000e+02  -1.5983657e+00   3.2076158e-01  -2.5196259e+00
   2.4039831e+01  -2.5681889e+01   4.0000000e+02  -1.5528964e+00   2.6881551e-01  -2.5583737e+00
   2.4096225e+01  -2.5564347e+01   4.0000000e+02  -1.4947064e+00   2.0296674e-01  -2.6090386e+00
   2.4141569e+01  -2.5442993e+01   4.0000000e+02  -1.4235500e+00   1.2331360e-01  -2.6694483e+00
   2.4175583e+01  -2.5318666e+01   4.0000000e+02  -1.3393621e+00   2.9902762e-02  -2.7369580e+00
   2.4198068e+01  -2.5192222e+01   4.0000000e+02  -1.2423255e+00  -7.7209957e-02  -2.8085241e+00
   2.4208907e+01  -2.5064529e+01   4.0000000e+02  -1.1329294e+00  -1.9789095e-01  -2.8807862e+00
   2.4208062e+01  -2.4936463e+01   4.0000000e+02  -1.0120078e+00  -3.3186027e-01  -2.9501592e+00
   2.4195575e+01  -2.4808896e+01   4.0000000e+02  -8.8074784e-01  -4.7863260e-01  -3.0129313e+00
   2.4171566e+01  -2.4682697e+01   4.0000000e+02  -7.4067548e-01  -6.3745768e-01  -3.0653666e+00
   2.4136234e+01  -2.4558721e+01   4.0000000e+02  -5.9359939e-01  -8.0728688e-01  -3.1038268e+00
   2.4089849e+01  -2.4437808e+01   4.0000000e+02  -4.4152628e-01  -9.8675822e-01  -3.1249082e+00
   2.4032755e+01  -2.4320772e+01   4.0000000e+02  -2.8655706e-01  -1.1742050e+00  -3.1255881e+00
   2.3965366e+01  -2.4208401e+01   4.0000000e+02  -1.3077635e-01  -1.3676797e+00  -3.1033765e+00
   2.3888159e+01  -2.4101448e+01   4.0000000e+02   2.3866348e-02  -1.5650081e+00  -3.0564551e+00
   2.3801674e+01  -2.4000630e+01   4.0000000e+02   1.7564828e-01  -1.7638383e+00  -2.9837879e+00
   2.3706508e+01  -2.3906619e+01   4.0000000e+02   3.2315560e-01  -1.9617093e+00  -2.8851839e+00
   2.3603315e+01  -2.3820042e+01   4.0000000e+02   4.6532772e-01  -2.1561014e+00  -2.7613139e+00
   2.3492793e+01  -2.3741475e+01   4.0000000e+02   6.0149194e-01  -2.3445024e+00  -2.6136650e+00
   2.2885146e+01  -2.3358892e+01   4.0000000e+02   1.1609841e+00  -3.1984289e+00  -1.4740918e+00
   2.2747192e+01  -2.3336925e+01   4.0000000e+02   1.2586504e+00  -3.3024601e+00  -1.2406706e+00
   2.2607843e+01  -2.3324592e+01   4.0000000e+02   1.3541837e+00  -3.3877293e+00  -1.0070421e+00
   2.2467885e+01  -2.3321961e+01   4.0000000e+02   1.4483471e+00  -3.4534797e+00  -7.7710992e-01
   2.2328108e+01  -2.3329048e+01   4.0000000e+02   1.5416847e+00  -3.4993926e+00  -5.5486793e-01
   2.2189302e+01  -2.3345813e+01   4.0000000e+02   1.6344523e+00  -3.5256556e+00  -3.4437215e-01
   2.2052250e+01  -2.3372160e+01   4.0000000e+02   1.7265725e+00  -3.5330047e+00  -1.4969263e-01
   2.1917727e+01  -2.3407942e+01   4.0000000e+02   1.8176182e+00  -3.5227226e+00   2.5145620e-02
   2.1786497e+01  -2.3452954e+01   4.0000000e+02   1.9068230e+00  -3.4966003e+00   1.7628201e-01
   2.1659305e+01  -2.3506944e+01   4.0000000e+02   1.9931274e+00  -3.4568379e+00   3.0015276e-01
   2.1536875e+01  -2.3569604e+01   4.0000000e+02   2.0752345e+00  -3.4059169e+00   3.9367976e-01
   2.1419911e+01  -2.3640580e+01   4.0000000e+02   2.1516791e+00  -3.3464376e+00   4.5443321e-01
   2.1309083e+01  -2.3719467e+01   4.0000000e+02   2.2208964e+00  -3.2809589e+00   4.8084440e-01
   2.1205035e+01  -2.3805818e+01   4.0000000e+02   2.2812703e+00  -3.2118520e+00   4.7231640e-01
   2.1108372e+01  -2.3899139e+01   4.0000000e+02   2.3311706e+00  -3.1411904e+00   4.2934153e-01
   2.1019662e+01  -2.3998898e+01   4.0000000e+02   2.3689707e+00  -3.0706792e+00   3.5347882e-01
   2.0939431e+01  -2.4104524e+01   4.0000000e+02   2.3930594e+00  -3.0016281e+00   2.4727367e-01
   2.0868161e+01  -2.4215411e+01   4.0000000e+02   2.4018592e+00  -2.9349568e+00   1.1407464e-01
   2.0806283e+01  -2.4330923e+01   4.0000000e+02   2.3938665e+00  -2.8712182e+00  -4.2207968e-02
   2.0754180e+01  -2.4450392e+01   4.0000000e+02   2.3677192e+00  -2.8106375e+00  -2.1737390e-01
   2.0712181e+01  -2.4573129e+01   4.0000000e+02   2.3222931e+00  -2.7531413e+00  -4.0720739e-01
   2.0680558e+01  -2.4698422e+01   4.0000000e+02   2.2568200e+00  -2.6983877e+00  -6.0767869e-01
   2.0659528e+01  -2.4825544e+01   4.0000000e+02   2.1709985e+00  -2.6457869e+00  -8.1510151e-01
   2.0649244e+01  -2.4953753e+01   4.0000000e+02   2.0650876e+00  -2.5945196e+00  -1.0261722e+00
   2.0649800e+01  -2.5082300e+01   4.0000000e+02   1.9399435e+00  -2.5435559e+00  -1.2379746e+00
   2.0661227e+01  -2.5210431e+01   4.0000000e+02   1.7970033e+00  -2.4916801e+00  -1.4479060e+00
   2.0683492e+01  -2.5337393e+01   4.0000000e+02   1.6382047e+00  -2.4375228e+00  -1.6535935e+00
   2.0716498e+01  -2.5462436e+01   4.0000000e+02   1.4658634e+00  -2.3796064e+00  -1.8528116e+00
   2.0760083e+01  -2.5584819e+01   4.0000000e+02   1.2825235e+00  -2.3164014e+00  -2.0434297e+00
   2.0814019e+01  -2.5703817e+01   4.0000000e+02   1.0908100e+00  -2.2463946e+00  -2.2233938e+00
   2.0878018e+01  -2.5818719e+01   4.0000000e+02   8.9331685e-01  -2.1681704e+00  -2.3907433e+00
   2.0951725e+01  -2.5928839e+01   4.0000000e+02   6.9252267e-01  -2.0804961e+00  -2.5436424e+00
   2.1034725e+01  -2.6033518e+01   4.0000000e+02   4.9075266e-01  -1.9824078e+00  -2.6804340e+00
   2.1126546e+01  -2.6132125e+01   4.0000000e+02   2.9017527e-01  -1.8732902e+00  -2.7996863e+00
   2.1226655e+01  -2.6224067e+01   4.0000000e+02   9.2803904e-02  -1.7529409e+00  -2.9002268e+00
   2.1334468e+01  -2.6308787e+01   4.0000000e+02  -9.9491521e-02  -1.6216134e+00  -2.9811810e+00
   2.1449347e+01  -2.6385773e+01   4.0000000e+02  -2.8499537e-01  -1.4800373e+00  -3.0419916e+00
   2.1570610e+01  -2.6454557e+01   4.0000000e+02  -4.6216592e-01  -1.3294118e+00  -3.0824508e+00
   2.1697530e+01  -2.6514720e+01   4.0000000e+02  -6.2967112e-01  -1.1713822e+00  -3.1027250e+00
   2.1829343e+01  -2.6565895e+01   4.0000000e+02  -7.8643123e-01  -1.0079900e+00  -3.1033890e+00
   2.1965251e+01  -2.6607770e+01   4.0000000e+02  -9.3165215e-01  -8.4161009e-01  -3.0854547e+00
   2.2104427e+01  -2.6640090e+01   4.0000000e+02  -1.0648426e+00  -6.7486899e-01  -3.0503921e+00
   2.2246024e+01  -2.6662655e+01   4.0000000e+02  -1.1858069e+00  -5.1054448e-01  -3.0001340e+00
   2.2389175e+01  -2.6675328e+01   4.0000000e+02  -1.2946223e+00  -3.5145060e-01  -2.9370424e+00
   2.2533005e+01  -2.6678032e+01   4.0000000e+02  -1.3915883e+00  -2.0030625e-01  -2.8638521e+00
   2.2676632e+01  -2.6670749e+01   4.0000000e+02  -1.4771582e+00  -5.9610598e-02  -2.7835848e+00
   2.2819178e+01  -2.6653524e+01   4.0000000e+02  -1.5518768e+00   6.8485594e-02  -2.6994296e+00
   2.2959771e+01  -2.6626464e+01   4.0000000e+02  -1.6163074e+00   1.8227153e-01  -2.6146219e+00
   2.3097552e+01  -2.6589733e+01   4.0000000e+02  -1.6709673e+00   2.8053275e-01  -2.5323273e+00
   2.3231682e+01  -2.6543556e+01   4.0000000e+02  -1.7162862e+00   3.6256827e-01  -2.4555236e+00
   2.3361348e+01  -2.6488215e+01   4.0000000e+02  -1.7525722e+00   4.2815408e-01  -2.3869124e+00
   2.3485766e+01  -2.6424049e+01   4.0000000e+02  -1.7799949e+00   4.7746704e-01  -2.3288494e+00
   2.3604188e+01  -2.6351448e+01   4.0000000e+02  -1.7985811e+00   5.1098026e-01  -2.2832961e+00
   2.3715908e+01  -2.6270853e+01   4.0000000e+02  -1.8082254e+00   5.2935003e-01  -2.2517751e+00
   2.3820262e+01  -2.6182753e+01   4.0000000e+02  -1.8087019e+00   5.3330027e-01  -2.2353465e+00
   2.3916638e+01  -2.6087682e+01   4.0000000e+02  -1.7996873e+00   5.2353101e-01  -2.2345752e+00
   2.4004476e+01  -2.5986214e+01   4.0000000e+02  -1.7807800e+00   5.0064351e-01  -2.2495199e+00
   2.4083268e+01  -2.5878959e+01   4.0000000e+02  -1.7515240e+00   4.6509494e-01  -2.2797283e+00
   2.4152569e+01  -2.5766561e+01   4.0000000e+02  -1.7114480e+00   4.1718912e-01  -2.3242269e+00
   2.4211992e+01  -2.5649693e+01   4.0000000e+02  -1.6600986e+00   3.5707869e-01  -2.3815512e+00
   2.4261212e+01  -2.5529053e+01   4.0000000e+02  -1.5970905e+00   2.8479279e-01  -2.4497772e+00
   2.4299968e+01  -2.5405359e+01   4.0000000e+02  -1.5221617e+00   2.0027669e-01  -2.5265711e+00
   2.4328063e+01  -2.5279343e+01   4.0000000e+02  -1.4352315e+00   1.0343921e-01  -2.6092503e+00
   2.4345364e+01  -2.5151752e+01   4.0000000e+02  -1.3364626e+00  -5.7867181e-03  -2.6948431e+00
   2.4351805e+01  -2.5023336e+01   4.0000000e+02  -1.2263055e+00  -1.2738952e-01  -2.7801576e+00
   2.4347380e+01  -2.4894850e+01   4.0000000e+02  -1.1055292e+00  -2.6121873e-01  -2.8618475e+00
   2.4332151e+01  -2.4767047e+01   4.0000000e+02  -9.7523368e-01  -4.0692613e-01  -2.9364749e+00
   2.4306238e+01  -2.4640673e+01   4.0000000e+02  -8.3681973e-01  -5.6392824e-01  -3.0005952e+00
   2.4269825e+01  -2.4516463e+01   4.0000000e+02  -6.9194762e-01  -7.3136924e-01  -3.0508407e+00
   2.4223154e+01  -2.4395138e+01   4.0000000e+02  -5.4246076e-01  -9.0811018e-01  -3.0840316e+00
   2.4166523e+01  -2.4277400e+01   4.0000000e+02  -3.9029450e-01  -1.0927366e+00  -3.0972985e+00
   2.4100285e+01  -2.4163929e+01   4.0000000e+02  -2.3737984e-01  -1.2835813e+00  -3.0882121e+00
   2.4024848e+01  -2.4055378e+01   4.0000000e+02  -8.5548478e-02  -1.4787619e+00  -3.0549085e+00
   2.3940665e+01  -2.3952370e+01   4.0000000e+02   6.3560392e-02  -1.6762364e+00  -2.9961930e+00
   2.3848239e+01  -2.3855496e+01   4.0000000e+02   2.0856094e-01  -1.8738456e+00  -2.9116095e+00
   2.3748115e+01  -2.3765309e+01   4.0000000e+02   3.4837735e-01  -2.0693712e+00  -2.8014620e+00
   2.3640879e+01  -2.3682323e+01   4.0000000e+02   4.8226968e-01  -2.2605774e+00  -2.6667927e+00
   2.3527155e+01  -2.3607013e+01   4.0000000e+02   6.0984288e-01  -2.4452458e+00  -2.5093188e+00
   2.3407598e+01  -2.3539804e+01   4.0000000e+02   7.3104440e-01  -2.6212203e+00  -2.3313266e+00
   2.3282895e+01  -2.3481081e+01   4.0000000e+02   8.4613110e-01  -2.7864189e+00  -2.1355752e+00
   2.3153759e+01  -2.3431174e+01   4.0000000e+02   9.5563216e-01  -2.9388756e+00  -1.9251727e+00
   2.3020924e+01  -2.3390368e+01   4.0000000e+02   1.0602901e+00  -3.0767616e+00  -1.7034917e+00
   2.2313461e+01  -2.3201601e+01   4.0000000e+02   1.5006759e+00  -3.5861139e+00  -3.2312591e-01
   2.2174341e+01  -2.3218180e+01   4.0000000e+02   1.5899024e+00  -3.6077711e+00  -1.0329070e-01
   2.2036814e+01  -2.3243714e+01   4.0000000e+02   1.6797019e+00  -3.6109435e+00   1.0243719e-01
   2.1901552e+01  -2.3278077e+01   4.0000000e+02   1.7697581e+00  -3.5968001e+00   2.9035268e-01
   2.1769220e+01  -2.3321100e+01   4.0000000e+02   1.8594240e+00  -3.5670030e+00   4.5680472e-01
   2.1640468e+01  -2.3372575e+01   4.0000000e+02   1.9477616e+00  -3.5236312e+00   5.9831338e-01
   2.1515932e+01  -2.3432246e+01   4.0000000e+02   2.0335893e+00  -3.4690706e+00   7.1172657e-01
   2.1396230e+01  -2.3499823e+01   4.0000000e+02   2.1155546e+00  -3.4058644e+00   7.9436574e-01
   2.1281956e+01  -2.3574971e+01   4.0000000e+02   2.1921964e+00  -3.3365644e+00   8.4423033e-01
   2.1173683e+01  -2.3657321e+01   4.0000000e+02   2.2620017e+00  -3.2635851e+00   8.6012871e-01
   2.1071957e+01  -2.3746467e+01   4.0000000e+02   2.3234438e+00  -3.1890880e+00   8.4181549e-01
   2.0977292e+01  -2.3841967e+01   4.0000000e+02   2.3750013e+00  -3.1149016e+00   7.9005845e-01
   2.0890172e+01  -2.3943350e+01   4.0000000e+02   2.4151600e+00  -3.0424818e+00   7.0660124e-01
   2.0811049e+01  -2.4050112e+01   4.0000000e+02   2.4424095e+00  -2.9729109e+00   5.9407482e-01
   2.0740335e+01  -2.4161722e+01   4.0000000e+02   2.4552513e+00  -2.9069148e+00   4.5582040e-01
   2.0678403e+01  -2.4277624e+01   4.0000000e+02   2.4522245e+00  -2.8448997e+00   2.9565110e-01
   2.0625589e+01  -2.4397238e+01   4.0000000e+02   2.4319628e+00  -2.7869906e+00   1.1759167e-01
   2.0582181e+01  -2.4519965e+01   4.0000000e+02   2.3932856e+00  -2.7330591e+00  -7.4355848e-02
   2.0548425e+01  -2.4645188e+01   4.0000000e+02   2.3353058e+00  -2.6827508e+00  -2.7642019e-01
   2.0524521e+01  -2.4772277e+01   4.0000000e+02   2.2575448e+00  -2.6355002e+00  -4.8519170e-01
   2.0510619e+01  -2.4900589e+01   4.0000000e+02   2.1600319e+00  -2.5905430e+00  -6.9766515e-01
   2.0506821e+01  -2.5029474e+01   4.0000000e+02   2.0433588e+00  -2.5469295e+00  -9.1123413e-01
   2.0513178e+01  -2.5158276e+01   4.0000000e+02   1.9086860e+00  -2.5035400e+00  -1.1236153e+00
   2.0529689e+01  -2.5286339e+01   4.0000000e+02   1.7576845e+00  -2.4591067e+00  -1.3327592e+00
   2.0556303e+01  -2.5413007e+01   4.0000000e+02   1.5924327e+00  -2.4122453e+00  -1.5367568e+00
   2.0592913e+01  -2.5537629e+01   4.0000000e+02   1.4152798e+00  -2.3614936e+00  -1.7337633e+00
   2.0639364e+01  -2.5659565e+01   4.0000000e+02   1.2286930e+00  -2.3053592e+00  -1.9219770e+00
   2.0695445e+01  -2.5778184e+01   4.0000000e+02   1.0351390e+00  -2.2423805e+00  -2.0996180e+00
   2.0760893e+01  -2.5892871e+01   4.0000000e+02   8.3698315e-01  -2.1711918e+00  -2.2649648e+00
   2.0835398e+01  -2.6003030e+01   4.0000000e+02   6.3643480e-01  -2.0905945e+00  -2.4164008e+00
   2.0918594e+01  -2.6108086e+01   4.0000000e+02   4.3553978e-01  -1.9996325e+00  -2.5524445e+00
   2.1010072e+01  -2.6207491e+01   4.0000000e+02   2.3618406e-01  -1.8976535e+00  -2.6718058e+00
   2.1109371e+01  -2.6300723e+01   4.0000000e+02   4.0129134e-02  -1.7843703e+00  -2.7733996e+00
   2.1215991e+01  -2.6387291e+01   4.0000000e+02  -1.5097773e-01  -1.6598915e+00  -2.8563797e+00
   2.1329383e+01  -2.6466740e+01   4.0000000e+02  -3.3559731e-01  -1.5247462e+00  -2.9201403e+00
   2.1448965e+01  -2.6538649e+01   4.0000000e+02  -5.1231578e-01  -1.3798770e+00  -2.9643469e+00
   2.1574114e+01  -2.6602638e+01   4.0000000e+02  -6.7987950e-01  -1.2266279e+00  -2.9889495e+00
   2.1704176e+01  -2.6658366e+01   4.0000000e+02  -8.3723552e-01  -1.0667100e+00  -2.9942233e+00
   2.1838468e+01  -2.6705539e+01   4.0000000e+02  -9.8358050e-01  -9.0215572e-01  -2.9808010e+00
   2.1976280e+01  -2.6743904e+01   4.0000000e+02  -1.1183783e+00  -7.3527005e-01  -2.9497162e+00
   2.2116882e+01  -2.6773258e+01   4.0000000e+02  -1.2413828e+00  -5.6855343e-01  -2.9024238e+00
   2.2259526e+01  -2.6793443e+01   4.0000000e+02  -1.3526176e+00  -4.0462357e-01  -2.8408112e+00
   2.2403453e+01  -2.6804352e+01   4.0000000e+02  -1.4523509e+00  -2.4610906e-01  -2.7671687e+00
   2.2547895e+01  -2.6805927e+01   4.0000000e+02  -1.5410411e+00  -9.5541157e-02  -2.6841383e+00
   2.2692082e+01  -2.6798159e+01   4.0000000e+02  -1.6192768e+00   4.4765408e-02  -2.5946294e+00
   2.2835244e+01  -2.6781090e+01   4.0000000e+02  -1.6877112e+00   1.7282072e-01  -2.5017115e+00
   2.2976618e+01  -2.6754810e+01   4.0000000e+02  -1.7469980e+00   2.8704926e-01  -2.4085016e+00
   2.3115452e+01  -2.6719461e+01   4.0000000e+02  -1.7977402e+00   3.8634827e-01  -2.3180430e+00
   2.3251011e+01  -2.6675231e+01   4.0000000e+02  -1.8404430e+00   4.7010050e-01  -2.2332095e+00
   2.3382576e+01  -2.6622354e+01   4.0000000e+02  -1.8754839e+00   5.3814264e-01  -2.1566273e+00
   2.3509455e+01  -2.6561113e+01   4.0000000e+02  -1.9031045e+00   5.9070817e-01  -2.0905991e+00
   2.3630984e+01  -2.6491832e+01   4.0000000e+02  -1.9234018e+00   6.2832699e-01  -2.0370745e+00
   2.3746529e+01  -2.6414879e+01   4.0000000e+02  -1.9363378e+00   6.5172001e-01  -1.9976155e+00
   2.3855494e+01  -2.6330661e+01   4.0000000e+02  -1.9417523e+00   6.6169284e-01  -1.9733751e+00
   2.3957318e+01  -2.6239621e+01   4.0000000e+02  -1.9393754e+00   6.5903582e-01  -1.9650903e+00
   2.4051485e+01  -2.6142240e+01   4.0000000e+02  -1.9288514e+00   6.4445654e-01  -1.9730521e+00
   2.4137520e+01  -2.6039027e+01   4.0000000e+02  -1.9097484e+00   6.1852046e-01  -1.9971166e+00
   2.4214996e+01  -2.5930524e+01   4.0000000e+02  -1.8815865e+00   5.8163340e-01  -2.0366838e+00
   2.4283534e+01  -2.5817298e+01   4.0000000e+02  -1.8438584e+00   5.3403305e-01  -2.0907170e+00
   2.4342803e+01  -2.5699936e+01   4.0000000e+02  -1.7960577e+00   4.7580014e-01  -2.1577674e+00
   2.4392524e+01  -2.5579048e+01   4.0000000e+02  -1.7377253e+00   4.0689089e-01  -2.2359968e+00
   2.4432471e+01  -2.5455260e+01   4.0000000e+02  -1.6684944e+00   3.2716991e-01  -2.3232275e+00
   2.4462467e+01  -2.5329209e+01   4.0000000e+02  -1.5881392e+00   2.3644783e-01  -2.4170009e+00
   2.4482391e+01  -2.5201543e+01   4.0000000e+02  -1.4966357e+00   1.3453447e-01  -2.5146172e+00
   2.4492172e+01  -2.5072917e+01   4.0000000e+02  -1.3942057e+00   2.1284719e-02  -2.6131935e+00
   2.4491793e+01  -2.4943986e+01   4.0000000e+02  -1.2813532e+00  -1.0335079e-01  -2.7097071e+00
   2.4481286e+01  -2.4815408e+01   4.0000000e+02  -1.1588836e+00  -2.3927250e-01  -2.8010380e+00
   2.4460738e+01  -2.4687835e+01   4.0000000e+02  -1.0279011e+00  -3.8618715e-01  -2.8840148e+00
   2.4430282e+01  -2.4561912e+01   4.0000000e+02  -8.8977457e-01  -5.4357542e-01  -2.9554763e+00
   2.4390102e+01  -2.4438274e+01   4.0000000e+02  -7.4609292e-01  -7.1066435e-01  -3.0123401e+00
   2.4340427e+01  -2.4317543e+01   4.0000000e+02  -5.9859178e-01  -8.8642430e-01  -3.0516980e+00
   2.4281532e+01  -2.4200325e+01   4.0000000e+02  -4.4907485e-01  -1.0695770e+00  -3.0709222e+00
   2.4213738e+01  -2.4087206e+01   4.0000000e+02  -2.9932979e-01  -1.2586207e+00  -3.0677823e+00
   2.4137403e+01  -2.3978750e+01   4.0000000e+02  -1.5103980e-01  -1.4518725e+00  -3.0405573e+00
   2.4052930e+01  -2.3875497e+01   4.0000000e+02  -5.7221778e-03  -1.6475022e+00  -2.9881272e+00
   2.3960755e+01  -2.3777959e+01   4.0000000e+02   1.3534068e-01  -1.8435887e+00  -2.9100336e+00
   2.3861352e+01  -2.3686621e+01   4.0000000e+02   2.7113453e-01  -2.0381522e+00  -2.8065022e+00
   2.3755225e+01  -2.3601934e+01   4.0000000e+02   4.0094774e-01  -2.2292019e+00  -2.6784167e+00
   2.3642911e+01  -2.3524316e+01   4.0000000e+02   5.2437638e-01  -2.4147581e+00  -2.5272619e+00
   2.3524973e+01  -2.3454149e+01   4.0000000e+02   6.4132777e-01  -2.5928815e+00  -2.3550326e+00
   2.3401998e+01  -2.3391780e+01   4.0000000e+02   7.5200565e-01  -2.7616879e+00  -2.1641332e+00
   2.3274596e+01  -2.3337513e+01   4.0000000e+02   8.5688307e-01  -2.9193690e+00  -1.9572705e+00
   2.3143399e+01  -2.3291616e+01   4.0000000e+02   9.5666055e-01  -3.0641995e+00  -1.7373759e+00
   2.3009050e+01  -2.3254314e+01   4.0000000e+02   1.0522195e+00  -3.1945720e+00  -1.5075206e+00
   2.2872211e+01  -2.3225789e+01   4.0000000e+02   1.1445464e+00  -3.3090185e+00  -1.2708867e+00
   2.2733552e+01  -2.3206182e+01   4.0000000e+02   1.2346626e+00  -3.4062602e+00  -1.0307402e+00
   2.2593752e+01  -2.3195587e+01   4.0000000e+02   1.3235361e+00  -3.4852672e+00  -7.9042557e-01
   2.2453493e+01  -2.3194058e+01   4.0000000e+02   1.4120011e+00  -3.5453252e+00  -5.5337830e-01
   2.1717233e+01  -2.3201844e+01   4.0000000e+02   1.8183358e+00  -3.6196404e+00   7.6836732e-01
   2.1589456e+01  -2.3252610e+01   4.0000000e+02   1.9066785e+00  -3.5697559e+00   9.1819177e-01
   2.1465502e+01  -2.3310923e+01   4.0000000e+02   1.9937456e+00  -3.5094117e+00   1.0419765e+00
   2.1345895e+01  -2.3376537e+01   4.0000000e+02   2.0782826e+00  -3.4410405e+00   1.1370973e+00
   2.1231146e+01  -2.3449175e+01   4.0000000e+02   2.1589370e+00  -3.3670915e+00   1.2014419e+00
   2.1121746e+01  -2.3528533e+01   4.0000000e+02   2.2343160e+00  -3.2898970e+00   1.2335633e+00
   2.1018166e+01  -2.3614274e+01   4.0000000e+02   2.3030202e+00  -3.2115673e+00   1.2328178e+00
   2.0920855e+01  -2.3706036e+01   4.0000000e+02   2.3636667e+00  -3.1339121e+00   1.1994356e+00
   2.0830238e+01  -2.3803431e+01   4.0000000e+02   2.4148880e+00  -3.0584005e+00   1.1345502e+00
   2.0746715e+01  -2.3906044e+01   4.0000000e+02   2.4553198e+00  -2.9861551e+00   1.0401573e+00
   2.0670657e+01  -2.4013440e+01   4.0000000e+02   2.4835902e+00  -2.9179672e+00   9.1898997e-01
   2.0602407e+01  -2.4125160e+01   4.0000000e+02   2.4983170e+00  -2.8543325e+00   7.7435013e-01
   2.0542276e+01  -2.4240728e+01   4.0000000e+02   2.4981296e+00  -2.7954857e+00   6.0988356e-01
   2.0490546e+01  -2.4359647e+01   4.0000000e+02   2.4817198e+00  -2.7414378e+00   4.2935627e-01
   2.0447460e+01  -2.4481407e+01   4.0000000e+02   2.4479236e+00  -2.6919969e+00   2.3644271e-01
   2.0413229e+01  -2.4605485e+01   4.0000000e+02   2.3958210e+00  -2.6467893e+00   3.4547998e-02
   2.0388028e+01  -2.4731343e+01   4.0000000e+02   2.3248471e+00  -2.6052700e+00  -1.7328624e-01
   2.0371993e+01  -2.4858436e+01   4.0000000e+02   2.2348850e+00  -2.5667282e+00  -3.8443071e-01
   2.0365222e+01  -2.4986213e+01   4.0000000e+02   2.1263288e+00  -2.5302958e+00  -5.9664582e-01
   2.0367773e+01  -2.5114117e+01   4.0000000e+02   2.0001024e+00  -2.4949590e+00  -8.0800658e-01
   2.0379663e+01  -2.5241588e+01   4.0000000e+02   1.8576241e+00  -2.4595745e+00  -1.0168106e+00
   2.0400871e+01  -2.5368068e+01   4.0000000e+02   1.7007184e+00  -2.4228900e+00  -1.2214934e+00
   2.0431332e+01  -2.5492999e+01   4.0000000e+02   1.5315033e+00  -2.3835722e+00  -1.4205349e+00
   2.0470940e+01  -2.5615832e+01   4.0000000e+02   1.3522456e+00  -2.3402382e+00  -1.6124259e+00
   2.0519549e+01  -2.5736021e+01   4.0000000e+02   1.1652425e+00  -2.2914980e+00  -1.7956450e+00
   2.0576970e+01  -2.5853033e+01   4.0000000e+02   9.7270817e-01  -2.2359983e+00  -1.9686760e+00
   2.0642973e+01  -2.5966347e+01   4.0000000e+02   7.7671072e-01  -2.1724767e+00  -2.1300404e+00
   2.0717289e+01  -2.6075456e+01   4.0000000e+02   5.7914472e-01  -2.0998187e+00  -2.2783416e+00
   2.0799606e+01  -2.6179872e+01   4.0000000e+02   3.8173639e-01  -2.0171158e+00  -2.4122977e+00
   2.0889578e+01  -2.6279124e+01   4.0000000e+02   1.8607545e-01  -1.9237179e+00  -2.5307816e+00
   2.0986819e+01  -2.6372765e+01   4.0000000e+02  -6.3537456e-03  -1.8192780e+00  -2.6328297e+00
   2.1090905e+01  -2.6460372e+01   4.0000000e+02  -1.9414109e-01  -1.7037853e+00  -2.7176514e+00
   2.1201383e+01  -2.6541549e+01   4.0000000e+02  -3.7594552e-01  -1.5775757e+00  -2.7846407e+00
   2.1317763e+01  -2.6615925e+01   4.0000000e+02  -5.5049476e-01  -1.4413419e+00  -2.8333748e+00
   2.1439528e+01  -2.6683162e+01   4.0000000e+02  -7.1662839e-01  -1.2961135e+00  -2.8636349e+00
   2.1566131e+01  -2.6742955e+01   4.0000000e+02  -8.7333374e-01  -1.1432415e+00  -2.8754290e+00
   2.1697003e+01  -2.6795028e+01   4.0000000e+02  -1.0197855e+00  -9.8436948e-01  -2.8690374e+00
   2.1831550e+01  -2.6839145e+01   4.0000000e+02  -1.1553937e+00  -8.2139921e-01  -2.8450465e+00
   2.1969161e+01  -2.6875102e+01   4.0000000e+02  -1.2798178e+00  -6.5644959e-01  -2.8044009e+00
   2.2109206e+01  -2.6902734e+01   4.0000000e+02  -1.3929773e+00  -4.9180547e-01  -2.7484283e+00
   2.2251046e+01  -2.6921915e+01   4.0000000e+02  -1.4950402e+00  -3.2984467e-01  -2.6788502e+00
   2.2394029e+01  -2.6932557e+01   4.0000000e+02  -1.5863848e+00  -1.7296508e-01  -2.5977683e+00
   2.2537499e+01  -2.6934610e+01   4.0000000e+02  -1.6675566e+00  -2.3484597e-02  -2.5076189e+00
   2.2680797e+01  -2.6928065e+01   4.0000000e+02  -1.7392151e+00   1.1645934e-01  -2.4110965e+00
   2.2823264e+01  -2.6912952e+01   4.0000000e+02  -1.8020731e+00   2.4500638e-01  -2.3110641e+00
   2.2964246e+01  -2.6889341e+01   4.0000000e+02  -1.8568429e+00   3.6065938e-01  -2.2104461e+00
   2.3103099e+01  -2.6857339e+01   4.0000000e+02  -1.9041857e+00   4.6234212e-01  -2.1121253e+00
   2.3239186e+01  -2.6817095e+01   4.0000000e+02  -1.9446735e+00   5.4942143e-01  -2.0188466e+00
   2.3371887e+01  -2.6768793e+01   4.0000000e+02  -1.9787603e+00   6.2169685e-01  -1.9331420e+00
   2.3500601e+01  -2.6712653e+01   4.0000000e+02  -2.0067680e+00   6.7935279e-01  -1.8572703e+00
   2.3624745e+01  -2.6648934e+01   4.0000000e+02  -2.0288832e+00   7.2288287e-01  -1.7931773e+00
   2.3743763e+01  -2.6577925e+01   4.0000000e+02  -2.0451588e+00   7.5299729e-01  -1.7424765e+00
   2.3857121e+01  -2.6499951e+01   4.0000000e+02  -2.0555267e+00   7.7052445e-01  -1.7064342e+00
   2.3964317e+01  -2.6415367e+01   4.0000000e+02  -2.0598110e+00   7.7632088e-01  -1.6859579e+00
   2.4064881e+01  -2.6324555e+01   4.0000000e+02  -2.0577416e+00   7.7119075e-01  -1.6815944e+00
   2.4158373e+01  -2.6227927e+01   4.0000000e+02  -2.0489677e+00   7.5582843e-01  -1.6935214e+00
   2.4244391e+01  -2.6125919e+01   4.0000000e+02  -2.0330723e+00   7.3078201e-01  -1.7215409e+00
   2.4322568e+01  -2.6018991e+01   4.0000000e+02  -2.0095839e+00   6.9643550e-01  -1.7650829e+00
   2.4392575e+01  -2.5907622e+01   4.0000000e+02  -1.9779925e+00   6.5300797e-01  -1.8232149e+00
   2.4454124e+01  -2.5792311e+01   4.0000000e+02  -1.9377740e+00   6.0056959e-01  -1.8946530e+00
   2.4506966e+01  -2.5673573e+01   4.0000000e+02  -1.8884161e+00   5.3906132e-01  -1.9777964e+00
   2.4550892e+01  -2.5551935e+01   4.0000000e+02  -1.8294534e+00   4.6832151e-01  -2.0707665e+00
   2.4585736e+01  -2.5427937e+01   4.0000000e+02  -1.7605144e+00   3.8812125e-01  -2.1714413e+00
   2.4611372e+01  -2.5302127e+01   4.0000000e+02  -1.6813641e+00   2.9819560e-01  -2.2775060e+00
   2.4627716e+01  -2.5175060e+01   4.0000000e+02  -1.5919523e+00   1.9828330e-01  -2.3864882e+00
   2.4634725e+01  -2.5047293e+01   4.0000000e+02  -1.4924510e+00   8.8164480e-02  -2.4957942e+00
   2.4632399e+01  -2.4919386e+01   4.0000000e+02  -1.3832883e+00  -3.2292834e-02  -2.6027301e+00
   2.4620777e+01  -2.4791896e+01   4.0000000e+02  -1.2651568e+00  -1.6309585e-01  -2.7045320e+00
   2.4599937e+01  -2.4665380e+01   4.0000000e+02  -1.1390147e+00  -3.0408287e-01  -2.7983870e+00
   2.4569998e+01  -2.4540385e+01   4.0000000e+02  -1.0060585e+00  -4.5489692e-01  -2.8814719e+00
   2.4531116e+01  -2.4417453e+01   4.0000000e+02  -8.6768589e-01  -6.1495919e-01  -2.9510026e+00
   2.4483484e+01  -2.4297112e+01   4.0000000e+02  -7.2543618e-01  -7.8346706e-01  -3.0043060e+00
   2.4427330e+01  -2.4179882e+01   4.0000000e+02  -5.8093023e-01  -9.5939207e-01  -3.0389051e+00
   2.4362920e+01  -2.4066264e+01   4.0000000e+02  -4.3579823e-01  -1.1415046e+00  -3.0526195e+00
   2.4290548e+01  -2.3956746e+01   4.0000000e+02  -2.9160881e-01  -1.3284025e+00  -3.0436665e+00
   2.4210544e+01  -2.3851793e+01   4.0000000e+02  -1.4981097e-01  -1.5185473e+00  -3.0107491e+00
   2.4123266e+01  -2.3751854e+01   4.0000000e+02  -1.1681423e-02  -1.7102996e+00  -2.9531258e+00
   2.4029099e+01  -2.3657353e+01   4.0000000e+02   1.2171951e-01  -1.9019637e+00  -2.8706434e+00
   2.3928457e+01  -2.3568691e+01   4.0000000e+02   2.4957048e-01  -2.0918127e+00  -2.7637388e+00
   2.3821778e+01  -2.3486242e+01   4.0000000e+02   3.7131107e-01  -2.2781222e+00  -2.6334008e+00
   2.3709522e+01  -2.3410356e+01   4.0000000e+02   4.8664898e-01  -2.4591861e+00  -2.4811060e+00
   2.3592172e+01  -2.3341352e+01   4.0000000e+02   5.9555922e-01  -2.6333337e+00  -2.3087319e+00
   2.3470229e+01  -2.3279522e+01   4.0000000e+02   6.9827747e-01  -2.7989378e+00  -2.1184645e+00
   2.3344211e+01  -2.3225124e+01   4.0000000e+02   7.9528215e-01  -2.9544252e+00  -1.9127043e+00
   2.3214650e+01  -2.3178389e+01   4.0000000e+02   8.8726682e-01  -3.0982777e+00  -1.6939977e+00
   2.3082095e+01  -2.3139511e+01   4.0000000e+02   9.7509623e-01  -3.2290463e+00  -1.4649790e+00
   2.2947102e+01  -2.3108655e+01   4.0000000e+02   1.0597617e+00  -3.3453700e+00  -1.2283389e+00
   2.2810237e+01  -2.3085949e+01   4.0000000e+02   1.1423135e+00  -3.4460068e+00  -9.8681200e-01
   2.2672075e+01  -2.3071488e+01   4.0000000e+02   1.2237918e+00  -3.5298758e+00  -7.4319119e-01
   2.2533193e+01  -2.3065334e+01   4.0000000e+02   1.3051564e+00  -3.5961177e+00  -5.0033759e-01
   2.2394173e+01  -2.3067512e+01   4.0000000e+02   1.3872106e+00  -3.6441631e+00  -2.6120347e-01
   2.2255595e+01  -2.3078012e+01   4.0000000e+02   1.4705403e+00  -3.6738039e+00  -2.8841853e-02
   2.2118039e+01  -2.3096791e+01   4.0000000e+02   1.5554615e+00  -3.6852541e+00   1.9357972e-01
   2.1982081e+01  -2.3123771e+01   4.0000000e+02   1.6419870e+00  -3.6791943e+00   4.0279936e-01
   2.1848292e+01  -2.3158837e+01   4.0000000e+02   1.7298130e+00  -3.6567859e+00   5.9549978e-01
   2.1145197e+01  -2.3348129e+01   4.0000000e+02   2.1332724e+00  -3.3619058e+00   1.5637374e+00
   2.1034417e+01  -2.3428449e+01   4.0000000e+02   2.2133084e+00  -3.2779635e+00   1.6018180e+00
   2.0929208e+01  -2.3514920e+01   4.0000000e+02   2.2874378e+00  -3.1938051e+00   1.6070047e+00
   2.0829984e+01  -2.3607211e+01   4.0000000e+02   2.3543173e+00  -3.1112216e+00   1.5793731e+00
   2.0737135e+01  -2.3704970e+01   4.0000000e+02   2.4126339e+00  -3.0316535e+00   1.5198885e+00
   2.0651028e+01  -2.3807824e+01   4.0000000e+02   2.4610844e+00  -2.9561922e+00   1.4303752e+00
   2.0572011e+01  -2.3915378e+01   4.0000000e+02   2.4983501e+00  -2.8856072e+00   1.3134149e+00
   2.0500403e+01  -2.4027220e+01   4.0000000e+02   2.5230840e+00  -2.8203780e+00   1.1721927e+00
   2.0436500e+01  -2.4142920e+01   4.0000000e+02   2.5339117e+00  -2.7607398e+00   1.0102848e+00
   2.0380567e+01  -2.4262030e+01   4.0000000e+02   2.5294679e+00  -2.7067162e+00   8.3144550e-01
   2.0332845e+01  -2.4384091e+01   4.0000000e+02   2.5084596e+00  -2.6581491e+00   6.3936208e-01
   2.0293540e+01  -2.4508629e+01   4.0000000e+02   2.4697635e+00  -2.6147110e+00   4.3749830e-01
   2.0262832e+01  -2.4635160e+01   4.0000000e+02   2.4125341e+00  -2.5759181e+00   2.2894017e-01
   2.0240865e+01  -2.4763189e+01   4.0000000e+02   2.3363168e+00  -2.5411312e+00   1.6352777e-02
   2.0227752e+01  -2.4892218e+01   4.0000000e+02   2.2411317e+00  -2.5095619e+00  -1.9803973e-01
   2.0223573e+01  -2.5021738e+01   4.0000000e+02   2.1275312e+00  -2.4802815e+00  -4.1237667e-01
   2.0228372e+01  -2.5151242e+01   4.0000000e+02   1.9965923e+00  -2.4522306e+00  -6.2508511e-01
   2.0242159e+01  -2.5280216e+01   4.0000000e+02   1.8498731e+00  -2.4242389e+00  -8.3476031e-01
   2.0264908e+01  -2.5408150e+01   4.0000000e+02   1.6893050e+00  -2.3950443e+00  -1.0400811e+00
   2.0296556e+01  -2.5534537e+01   4.0000000e+02   1.5170657e+00  -2.3633180e+00  -1.2397311e+00
   2.0337006e+01  -2.5658872e+01   4.0000000e+02   1.3354408e+00  -2.3276948e+00  -1.4323615e+00
   2.0386124e+01  -2.5780658e+01   4.0000000e+02   1.1466913e+00  -2.2868039e+00  -1.6165868e+00
   2.0443739e+01  -2.5899405e+01   4.0000000e+02   9.5295687e-01  -2.2393096e+00  -1.7910038e+00
   2.0509646e+01  -2.6014637e+01   4.0000000e+02   7.5618844e-01  -2.1839535e+00  -1.9542394e+00
   2.0583602e+01  -2.6125888e+01   4.0000000e+02   5.5814125e-01  -2.1196068e+00  -2.1049828e+00
   2.0665331e+01  -2.6232708e+01   4.0000000e+02   3.6038596e-01  -2.0453195e+00  -2.2420341e+00
   2.0754524e+01  -2.6334661e+01   4.0000000e+02   1.6435595e-01  -1.9603713e+00  -2.3643273e+00
   2.0850836e+01  -2.6431334e+01   4.0000000e+02  -2.8613759e-02  -1.8643118e+00  -2.4709381e+00
   2.0953892e+01  -2.6522331e+01   4.0000000e+02  -2.1723686e-01  -1.7569933e+00  -2.5610897e+00
   2.1063287e+01  -2.6607279e+01   4.0000000e+02  -4.0026120e-01  -1.6385860e+00  -2.6341459e+00
   2.1178586e+01  -2.6685829e+01   4.0000000e+02  -5.7647030e-01  -1.5095831e+00  -2.6896060e+00
   2.1299326e+01  -2.6757658e+01   4.0000000e+02  -7.4471015e-01  -1.3707923e+00  -2.7271110e+00
   2.1425020e+01  -2.6822469e+01   4.0000000e+02  -9.0393065e-01  -1.2233196e+00  -2.7464663e+00
   2.1555157e+01  -2.6879996e+01   4.0000000e+02  -1.0532393e+00  -1.0685482e+00  -2.7476722e+00
   2.1689206e+01  -2.6929998e+01   4.0000000e+02  -1.1919394e+00  -9.0811839e-01  -2.7309797e+00
   2.1826617e+01  -2.6972270e+01   4.0000000e+02  -1.3195789e+00  -7.4389662e-01  -2.6969341e+00
   2.1966823e+01  -2.7006635e+01   4.0000000e+02  -1.4359577e+00  -5.7794874e-01  -2.6464350e+00
   2.2109244e+01  -2.7032950e+01   4.0000000e+02  -1.5411358e+00  -4.1249234e-01  -2.5807689e+00
   2.2253289e+01  -2.7051107e+01   4.0000000e+02  -1.6354140e+00  -2.4983911e-01  -2.5016230e+00
   2.2398361e+01  -2.7061029e+01   4.0000000e+02  -1.7192944e+00  -9.2320223e-02  -2.4110764e+00
   2.2543856e+01  -2.7062675e+01   4.0000000e+02  -1.7934366e+00   5.7802319e-02  -2.3115506e+00
   2.2689169e+01  -2.7056037e+01   4.0000000e+02  -1.8586010e+00   1.9843614e-01  -2.2057403e+00
   2.2833694e+01  -2.7041145e+01   4.0000000e+02  -1.9155941e+00   3.2775657e-01  -2.0965127e+00
   2.2976832e+01  -2.7018060e+01   4.0000000e+02  -1.9652112e+00   4.4429349e-01  -1.9868078e+00
   2.3117987e+01  -2.6986877e+01   4.0000000e+02  -2.0081880e+00   5.4698833e-01  -1.8795332e+00
   2.3256577e+01  -2.6947727e+01   4.0000000e+02  -2.0451683e+00   6.3523161e-01  -1.7774538e+00
   2.3392029e+01  -2.6900773e+01   4.0000000e+02  -2.0766710e+00   7.0884683e-01  -1.6831270e+00
   2.3523785e+01  -2.6846208e+01   4.0000000e+02  -2.1030767e+00   7.6805042e-01  -1.5988429e+00
   2.3651306e+01  -2.6784261e+01   4.0000000e+02  -2.1246278e+00   8.1338476e-01  -1.5265735e+00
   2.3774074e+01  -2.6715185e+01   4.0000000e+02  -2.1414273e+00   8.4562179e-01  -1.4679713e+00
   2.3891591e+01  -2.6639268e+01   4.0000000e+02  -2.1534547e+00   8.6566993e-01  -1.4243458e+00
   2.4003384e+01  -2.6556821e+01   4.0000000e+02  -2.1605757e+00   8.7447643e-01  -1.3966758e+00
   2.4109009e+01  -2.6468184e+01   4.0000000e+02  -2.1625616e+00   8.7295026e-01  -1.3855926e+00
   2.4208047e+01  -2.6373721e+01   4.0000000e+02  -2.1590980e+00   8.6189454e-01  -1.3913940e+00
   2.4300111e+01  -2.6273816e+01   4.0000000e+02  -2.1497970e+00   8.4196521e-01  -1.4140381e+00
   2.4384844e+01  -2.6168879e+01   4.0000000e+02  -2.1342097e+00   8.1365175e-01  -1.4531355e+00
   2.4461924e+01  -2.6059335e+01   4.0000000e+02  -2.1118326e+00   7.7726894e-01  -1.5079626e+00
   2.4531059e+01  -2.5945630e+01   4.0000000e+02  -2.0821221e+00   7.3296810e-01  -1.5774701e+00
   2.4591995e+01  -2.5828222e+01   4.0000000e+02  -2.0445123e+00   6.8075333e-01  -1.6603049e+00
   2.4644510e+01  -2.5707585e+01   4.0000000e+02  -1.9984400e+00   6.2050582e-01  -1.7548404e+00
   2.4688422e+01  -2.5584204e+01   4.0000000e+02  -1.9433814e+00   5.5201066e-01  -1.8592095e+00
   2.4723581e+01  -2.5458573e+01   4.0000000e+02  -1.8788871e+00   4.7498117e-01  -1.9713567e+00
   2.4749874e+01  -2.5331192e+01   4.0000000e+02  -1.8046285e+00   3.8908895e-01  -2.0890722e+00
   2.4767226e+01  -2.5202570e+01   4.0000000e+02  -1.7204471e+00   2.9399987e-01  -2.2100198e+00
   2.4775596e+01  -2.5073216e+01   4.0000000e+02  -1.6263868e+00   1.8940199e-01  -2.3317746e+00
   2.4774981e+01  -2.4943641e+01   4.0000000e+02  -1.5227308e+00   7.5048472e-02  -2.4518300e+00
   2.4765409e+01  -2.4814356e+01   4.0000000e+02  -1.4100145e+00  -4.9205958e-02  -2.5676146e+00
   2.4746948e+01  -2.4685869e+01   4.0000000e+02  -1.2890350e+00  -1.8336181e-01  -2.6764948e+00
   2.4719697e+01  -2.4558683e+01   4.0000000e+02  -1.1608292e+00  -3.2724491e-01  -2.7757997e+00
   2.4683788e+01  -2.4433295e+01   4.0000000e+02  -1.0266461e+00  -4.8047788e-01  -2.8628505e+00
   2.4639386e+01  -2.4310193e+01   4.0000000e+02  -8.8790178e-01  -6.4246583e-01  -2.9350121e+00
   2.4586688e+01  -2.4189855e+01   4.0000000e+02  -7.4612350e-01  -8.1239393e-01  -2.9897661e+00
   2.4525921e+01  -2.4072746e+01   4.0000000e+02  -6.0288623e-01  -9.8924146e-01  -3.0248024e+00
   2.4457340e+01  -2.3959319e+01   4.0000000e+02  -4.5975005e-01  -1.1718035e+00  -3.0381170e+00
   2.4381229e+01  -2.3850011e+01   4.0000000e+02  -3.1820065e-01  -1.3587236e+00  -3.0281098e+00
   2.4297899e+01  -2.3745241e+01   4.0000000e+02  -1.7959602e-01  -1.5485318e+00  -2.9936672e+00
   2.4207686e+01  -2.3645412e+01   4.0000000e+02  -4.5124698e-02  -1.7396785e+00  -2.9342206e+00
   2.4110948e+01  -2.3550906e+01   4.0000000e+02   8.4230608e-02  -1.9305743e+00  -2.8497685e+00
   2.4008069e+01  -2.3462082e+01   4.0000000e+02   2.0771093e-01  -2.1196143e+00  -2.7408666e+00
   2.3899452e+01  -2.3379281e+01   4.0000000e+02   3.2479990e-01  -2.3052004e+00  -2.6085831e+00
   2.3785519e+01  -2.3302816e+01   4.0000000e+02   4.3523394e-01  -2.4857642e+00  -2.4544215e+00
   2.3666711e+01  -2.3232978e+01   4.0000000e+02   5.3900208e-01  -2.6597683e+00  -2.2802360e+00
   2.3543485e+01  -2.3170032e+01   4.0000000e+02   6.3634496e-01  -2.8257146e+00  -2.0881340e+00
   2.3416313e+01  -2.3114217e+01   4.0000000e+02   7.2774321e-01  -2.9821438e+00  -1.8803897e+00
   2.3285681e+01  -2.3065743e+01   4.0000000e+02   8.1389607e-01  -3.1276362e+00  -1.6593705e+00
   2.3152084e+01  -2.3024795e+01   4.0000000e+02   8.9569243e-01  -3.2608133e+00  -1.4274878e+00
   2.3016028e+01  -2.2991526e+01   4.0000000e+02   9.7416285e-01  -3.3803493e+00  -1.1871692e+00
   2.2878028e+01  -2.2966062e+01   4.0000000e+02   1.0504259e+00  -3.4849876e+00  -9.4086092e-01
   2.2738605e+01  -2.2948500e+01   4.0000000e+02   1.1256247e+00  -3.5735789e+00  -6.9103918e-01
   2.2598284e+01  -2.2938904e+01   4.0000000e+02   1.2008552e+00  -3.6451352e+00  -4.4023001e-01
   2.2457593e+01  -2.2937313e+01   4.0000000e+02   1.2770988e+00  -3.6988897e+00  -1.9105047e-01
   2.2317061e+01  -2.2943731e+01   4.0000000e+02   1.3551502e+00  -3.7343775e+00   5.3777638e-02
   2.2177218e+01  -2.2958135e+01   4.0000000e+02   1.4355626e+00  -3.7515054e+00   2.9139573e-01
   2.2038590e+01  -2.2980470e+01   4.0000000e+02   1.5186025e+00  -3.7506187e+00   5.1881680e-01
   2.1901700e+01  -2.3010651e+01   4.0000000e+02   1.6042228e+00  -3.7325381e+00   7.3293230e-01
   2.1767065e+01  -2.3048566e+01   4.0000000e+02   1.6920611e+00  -3.6985642e+00   9.3054704e-01
   2.1635195e+01  -2.3094070e+01   4.0000000e+02   1.7814519e+00  -3.6504447e+00   1.1084505e+00
   2.1506590e+01  -2.3146993e+01   4.0000000e+02   1.8714701e+00  -3.5902948e+00   1.2634976e+00
   2.1381739e+01  -2.3207133e+01   4.0000000e+02   1.9609795e+00  -3.5204898e+00   1.3927370e+00
   2.1261121e+01  -2.3274263e+01   4.0000000e+02   2.0487001e+00  -3.4435310e+00   1.4935339e+00
   2.0628649e+01  -2.3624577e+01   4.0000000e+02   2.4049024e+00  -2.9771634e+00   1.8841579e+00
   2.0542963e+01  -2.3726459e+01   4.0000000e+02   2.4583157e+00  -2.9006218e+00   1.7968255e+00
   2.0463818e+01  -2.3832726e+01   4.0000000e+02   2.5016609e+00  -2.8295753e+00   1.6829263e+00
   2.0391495e+01  -2.3943022e+01   4.0000000e+02   2.5337114e+00  -2.7644274e+00   1.5454197e+00
   2.0326254e+01  -2.4056978e+01   4.0000000e+02   2.5531924e+00  -2.7053710e+00   1.3876437e+00
   2.0268331e+01  -2.4174209e+01   4.0000000e+02   2.5587992e+00  -2.6524216e+00   1.2131255e+00
   2.0217943e+01  -2.4294321e+01   4.0000000e+02   2.5492446e+00  -2.6054436e+00   1.0253574e+00
   2.0175281e+01  -2.4416908e+01   4.0000000e+02   2.5233368e+00  -2.5641597e+00   8.2763919e-01
   2.0140511e+01  -2.4541555e+01   4.0000000e+02   2.4800770e+00  -2.5281574e+00   6.2293841e-01
   2.0113776e+01  -2.4667837e+01   4.0000000e+02   2.4187661e+00  -2.4968919e+00   4.1381306e-01
   2.0095189e+01  -2.4795325e+01   4.0000000e+02   2.3391008e+00  -2.4696832e+00   2.0239470e-01
   2.0084841e+01  -2.4923582e+01   4.0000000e+02   2.2412464e+00  -2.4457259e+00  -9.5794508e-03
   2.0082791e+01  -2.5052169e+01   4.0000000e+02   2.1258680e+00  -2.4240936e+00  -2.2068377e-01
   2.0089074e+01  -2.5180644e+01   4.0000000e+02   1.9941160e+00  -2.4037562e+00  -4.2971591e-01
   2.0103693e+01  -2.5308563e+01   4.0000000e+02   1.8475668e+00  -2.3835948e+00  -6.3558314e-01
   2.0126625e+01  -2.5435483e+01   4.0000000e+02   1.6881192e+00  -2.3624235e+00  -8.3722943e-01
   2.0157816e+01  -2.5560964e+01   4.0000000e+02   1.5178692e+00  -2.3390073e+00  -1.0335677e+00
   2.0197183e+01  -2.5684569e+01   4.0000000e+02   1.3389798e+00  -2.3120860e+00  -1.2234532e+00
   2.0244615e+01  -2.5805866e+01   4.0000000e+02   1.1535608e+00  -2.2803970e+00  -1.4056882e+00
   2.0299970e+01  -2.5924428e+01   4.0000000e+02   9.6358140e-01  -2.2427037e+00  -1.5790416e+00
   2.0363078e+01  -2.6039840e+01   4.0000000e+02   7.7080783e-01  -2.1978261e+00  -1.7422976e+00
   2.0433738e+01  -2.6151694e+01   4.0000000e+02   5.7680074e-01  -2.1446808e+00  -1.8942883e+00
   2.0511723e+01  -2.6259594e+01   4.0000000e+02   3.8292986e-01  -2.0823201e+00  -2.0339395e+00
   2.0596777e+01  -2.6363157e+01   4.0000000e+02   1.9042059e-01  -2.0099742e+00  -2.1602885e+00
   2.0688616e+01  -2.6462014e+01   4.0000000e+02   4.0892373e-04  -1.9270888e+00  -2.2724941e+00
   2.0786929e+01  -2.6555812e+01   4.0000000e+02  -1.8601006e-01  -1.8333554e+00  -2.3698324e+00
   2.0891382e+01  -2.6644216e+01   4.0000000e+02  -3.6775114e-01  -1.7287285e+00  -2.4516876e+00
   2.1001613e+01  -2.6726907e+01   4.0000000e+02  -5.4372028e-01  -1.6134377e+00  -2.5175323e+00
   2.1117239e+01  -2.6803589e+01   4.0000000e+02  -7.1283881e-01  -1.4879784e+00  -2.5669238e+00
   2.1237854e+01  -2.6873984e+01   4.0000000e+02  -8.7406555e-01  -1.3531064e+00  -2.5995074e+00
   2.1363032e+01  -2.6937839e+01   4.0000000e+02  -1.0264518e+00  -1.2098184e+00  -2.6150343e+00
   2.1492327e+01  -2.6994921e+01   4.0000000e+02  -1.1691821e+00  -1.0593415e+00  -2.6134014e+00
   2.1625278e+01  -2.7045024e+01   4.0000000e+02  -1.3016301e+00  -9.0311154e-01  -2.5946970e+00
   2.1761406e+01  -2.7087966e+01   4.0000000e+02  -1.4233853e+00  -7.4276512e-01  -2.5592595e+00
   2.1900221e+01  -2.7123590e+01   4.0000000e+02  -1.5342765e+00  -5.8011618e-01  -2.5077350e+00
   2.2041219e+01  -2.7151766e+01   4.0000000e+02  -1.6343725e+00  -4.1713408e-01  -2.4411208e+00
   2.2183888e+01  -2.7172392e+01   4.0000000e+02  -1.7239710e+00  -2.5590038e-01  -2.3607922e+00
   2.2327710e+01  -2.7185392e+01   4.0000000e+02  -1.8035667e+00  -9.8555015e-02  -2.2685070e+00
   2.2472160e+01  -2.7190719e+01   4.0000000e+02  -1.8738124e+00   5.2773559e-02  -2.1663770e+00
   2.2616712e+01  -2.7188354e+01   4.0000000e+02  -1.9354727e+00   1.9605650e-01  -2.0568140e+00
   2.2760838e+01  -2.7178304e+01   4.0000000e+02  -1.9893701e+00   3.2945109e-01  -1.9424575e+00
   2.2904013e+01  -2.7160607e+01   4.0000000e+02  -2.0363402e+00   4.5139297e-01  -1.8260710e+00
   2.3045716e+01  -2.7135328e+01   4.0000000e+02  -2.0771825e+00   5.6066515e-01  -1.7104488e+00
   2.3185431e+01  -2.7102558e+01   4.0000000e+02  -2.1126208e+00   6.5644501e-01  -1.5983217e+00
   2.3322653e+01  -2.7062417e+01   4.0000000e+02  -2.1432774e+00   7.3832664e-01  -1.4922617e+00
   2.3456885e+01  -2.7015051e+01   4.0000000e+02  -2.1696495e+00   8.0630072e-01  -1.3946249e+00
   2.3587643e+01  -2.6960633e+01   4.0000000e+02  -2.1921015e+00   8.6071278e-01  -1.3074991e+00
   2.3714460e+01  -2.6899360e+01   4.0000000e+02  -2.2108644e+00   9.0219432e-01  -1.2326765e+00
   2.3836884e+01  -2.6831455e+01   4.0000000e+02  -2.2260417e+00   9.3157804e-01  -1.1716438e+00
   2.3954480e+01  -2.6757162e+01   4.0000000e+02  -2.2376196e+00   9.4980789e-01  -1.1255875e+00
   2.4066835e+01  -2.6676751e+01   4.0000000e+02  -2.2454846e+00   9.5785864e-01  -1.0953838e+00
   2.4173557e+01  -2.6590510e+01   4.0000000e+02  -2.2494334e+00   9.5665844e-01  -1.0816189e+00
   2.4274276e+01  -2.6498750e+01   4.0000000e+02  -2.2491873e+00   9.4703472e-01  -1.0845834e+00
   2.4368646e+01  -2.6401800e+01   4.0000000e+02  -2.2444004e+00   9.2967439e-01  -1.1042792e+00
   2.4456347e+01  -2.6300007e+01   4.0000000e+02  -2.2346675e+00   9.0510415e-01  -1.1404170e+00
   2.4537086e+01  -2.6193732e+01   4.0000000e+02  -2.2195278e+00   8.7368424e-01  -1.1924239e+00
   2.4610595e+01  -2.6083355e+01   4.0000000e+02  -2.1984740e+00   8.3561791e-01  -1.2594447e+00
   2.4676637e+01  -2.5969265e+01   4.0000000e+02  -2.1709597e+00   7.9096363e-01  -1.3403627e+00
   2.4734999e+01  -2.5851867e+01   4.0000000e+02  -2.1364152e+00   7.3965685e-01  -1.4338194e+00
   2.4785500e+01  -2.5731573e+01   4.0000000e+02  -2.0942697e+00   6.8152872e-01  -1.5382455e+00
   2.4827988e+01  -2.5608807e+01   4.0000000e+02  -2.0439823e+00   6.1632977e-01  -1.6518908e+00
   2.4862338e+01  -2.5483997e+01   4.0000000e+02  -1.9850719e+00   5.4374606e-01  -1.7728732e+00
   2.4888458e+01  -2.5357578e+01   4.0000000e+02  -1.9171619e+00   4.6342485e-01  -1.8991978e+00
   2.4906283e+01  -2.5229992e+01   4.0000000e+02  -1.8400174e+00   3.7499767e-01  -2.0287903e+00
   2.4915777e+01  -2.5101678e+01   4.0000000e+02  -1.7535753e+00   2.7810119e-01  -2.1595220e+00
   2.4916933e+01  -2.4973082e+01   4.0000000e+02  -1.6579810e+00   1.7241627e-01  -2.2892029e+00
   2.4909775e+01  -2.4844645e+01   4.0000000e+02  -1.5536017e+00   5.7694557e-02  -2.4155918e+00
   2.4894352e+01  -2.4716810e+01   4.0000000e+02  -1.4410346e+00  -6.6202242e-02  -2.5363900e+00
   2.4870742e+01  -2.4590012e+01   4.0000000e+02  -1.3210973e+00  -1.9927468e-01  -2.6492461e+00
   2.4839050e+01  -2.4464685e+01   4.0000000e+02  -1.1948136e+00  -3.4135047e-01  -2.7517626e+00
   2.4799409e+01  -2.4341255e+01   4.0000000e+02  -1.0633793e+00  -4.9206866e-01  -2.8415295e+00
   2.4751974e+01  -2.4220141e+01   4.0000000e+02  -9.2811721e-01  -6.5087204e-01  -2.9161754e+00
   2.4696929e+01  -2.4101753e+01   4.0000000e+02  -7.9043591e-01  -8.1700549e-01  -2.9734333e+00
   2.4634479e+01  -2.3986490e+01   4.0000000e+02  -6.5177029e-01  -9.8953618e-01  -3.0112279e+00
   2.4564853e+01  -2.3874741e+01   4.0000000e+02  -5.1353535e-01  -1.1673722e+00  -3.0277639e+00
   2.4488303e+01  -2.3766879e+01   4.0000000e+02  -3.7707540e-01  -1.3492979e+00  -3.0216134e+00
   2.4405102e+01  -2.3663268e+01   4.0000000e+02  -2.4362661e-01  -1.5339985e+00  -2.9917881e+00
   2.4315542e+01  -2.3564252e+01   4.0000000e+02  -1.1427672e-01  -1.7201048e+00  -2.9377881e+00
   2.4219935e+01  -2.3470163e+01   4.0000000e+02   1.0054171e-02  -1.9062109e+00  -2.8596218e+00
   2.4118612e+01  -2.3381312e+01   4.0000000e+02   1.2863659e-01  -2.0909074e+00  -2.7577930e+00
   2.4011919e+01  -2.3297997e+01   4.0000000e+02   2.4094554e-01  -2.2727938e+00  -2.6332608e+00
   2.3900219e+01  -2.3220492e+01   4.0000000e+02   3.4667105e-01  -2.4504988e+00  -2.4873698e+00
   2.3783890e+01  -2.3149056e+01   4.0000000e+02   4.4572405e-01  -2.6226783e+00  -2.3217743e+00
   2.3663323e+01  -2.3083923e+01   4.0000000e+02   5.3824153e-01  -2.7880268e+00  -2.1383437e+00
   2.3538921e+01  -2.3025309e+01   4.0000000e+02   6.2458356e-01  -2.9452667e+00  -1.9390852e+00
   2.3411099e+01  -2.2973408e+01   4.0000000e+02   7.0532330e-01  -3.0931458e+00  -1.7260737e+00
   2.3280279e+01  -2.2928390e+01   4.0000000e+02   7.8123030e-01  -3.2304357e+00  -1.5013947e+00
   2.3146896e+01  -2.2890403e+01   4.0000000e+02   8.5323638e-01  -3.3559215e+00  -1.2671285e+00
   2.3011388e+01  -2.2859574e+01   4.0000000e+02   9.2240257e-01  -3.4684142e+00  -1.0253339e+00
   2.2874203e+01  -2.2836002e+01   4.0000000e+02   9.8986140e-01  -3.5667653e+00  -7.7806471e-01
   2.2735790e+01  -2.2819766e+01   4.0000000e+02   1.0567679e+00  -3.6498986e+00  -5.2739241e-01
   2.2596604e+01  -2.2810919e+01   4.0000000e+02   1.1242320e+00  -3.7168568e+00  -2.7544188e-01
   2.2457102e+01  -2.2809489e+01   4.0000000e+02   1.1932578e+00  -3.7668649e+00  -2.4421854e-02
   2.2317740e+01  -2.2815482e+01   4.0000000e+02   1.2646871e+00  -3.7993994e+00   2.2334502e-01
   2.2178975e+01  -2.2828878e+01   4.0000000e+02   1.3391426e+00  -3.8142628e+00   4.6539992e-01
   2.2041264e+01  -2.2849633e+01   4.0000000e+02   1.4169874e+00  -3.8116484e+00   6.9913502e-01
   2.1905057e+01  -2.2877679e+01   4.0000000e+02   1.4983001e+00  -3.7921861e+00   9.2180945e-01
   2.1770803e+01  -2.2912923e+01   4.0000000e+02   1.5828593e+00  -3.7569603e+00   1.1305596e+00
   2.1638945e+01  -2.2955249e+01   4.0000000e+02   1.6701559e+00  -3.7074912e+00   1.3224464e+00
   2.1509917e+01  -2.3004519e+01   4.0000000e+02   1.7594199e+00  -3.6456784e+00   1.4945218e+00
   2.1384148e+01  -2.3060570e+01   4.0000000e+02   1.8496596e+00  -3.5737145e+00   1.6439114e+00
   2.1262056e+01  -2.3123216e+01   4.0000000e+02   1.9397193e+00  -3.4939687e+00   1.7679307e+00
   2.1144048e+01  -2.3192253e+01   4.0000000e+02   2.0283432e+00  -3.4088595e+00   1.8642002e+00
   2.1030521e+01  -2.3267450e+01   4.0000000e+02   2.1142253e+00  -3.3207348e+00   1.9307931e+00
   2.0921856e+01  -2.3348559e+01   4.0000000e+02   2.1960666e+00  -3.2317582e+00   1.9663590e+00
   2.0818423e+01  -2.3435312e+01   4.0000000e+02   2.2726010e+00  -3.1438324e+00   1.9702327e+00
   2.0720575e+01  -2.3527420e+01   4.0000000e+02   2.3426075e+00  -3.0585472e+00   1.9425273e+00
   2.0199822e+01  -2.4001405e+01   4.0000000e+02   2.5624527e+00  -2.6205939e+00   1.7145387e+00
   2.0141510e+01  -2.4118786e+01   4.0000000e+02   2.5739003e+00  -2.5695208e+00   1.5389320e+00
   2.0090327e+01  -2.4238925e+01   4.0000000e+02   2.5709055e+00  -2.5249078e+00   1.3507372e+00
   2.0046449e+01  -2.4361457e+01   4.0000000e+02   2.5522452e+00  -2.4864840e+00   1.1531336e+00
   2.0010028e+01  -2.4486012e+01   4.0000000e+02   2.5168493e+00  -2.4538553e+00   9.4896363e-01
   1.9981199e+01  -2.4612209e+01   4.0000000e+02   2.4639043e+00  -2.4265073e+00   7.4066076e-01
   1.9960072e+01  -2.4739664e+01   4.0000000e+02   2.3929524e+00  -2.4037985e+00   5.3022591e-01
   1.9946734e+01  -2.4867988e+01   4.0000000e+02   2.3039706e+00  -2.3849654e+00   3.1926160e-01
   1.9941251e+01  -2.4996785e+01   4.0000000e+02   2.1974197e+00  -2.3691331e+00   1.0904390e-01
   1.9943665e+01  -2.5125660e+01   4.0000000e+02   2.0742426e+00  -2.3553274e+00  -9.9390710e-02
   1.9953993e+01  -2.5254214e+01   4.0000000e+02   1.9358264e+00  -2.3424931e+00  -3.0513201e-01
   1.9972227e+01  -2.5382048e+01   4.0000000e+02   1.7839172e+00  -2.3295133e+00  -5.0731013e-01
   1.9998337e+01  -2.5508767e+01   4.0000000e+02   1.6205008e+00  -2.3152290e+00  -7.0503533e-01
   2.0032267e+01  -2.5633974e+01   4.0000000e+02   1.4476837e+00  -2.2984560e+00  -8.9734279e-01
   2.0073934e+01  -2.5757277e+01   4.0000000e+02   1.2675611e+00  -2.2780013e+00  -1.0831904e+00
   2.0123232e+01  -2.5878290e+01   4.0000000e+02   1.0821096e+00  -2.2526812e+00  -1.2614820e+00
   2.0180029e+01  -2.5996631e+01   4.0000000e+02   8.9311891e-01  -2.2213428e+00  -1.4310953e+00
   2.0244169e+01  -2.6111927e+01   4.0000000e+02   7.0215119e-01  -2.1828883e+00  -1.5909313e+00
   2.0315471e+01  -2.6223812e+01   4.0000000e+02   5.1054947e-01  -2.1363069e+00  -1.7399520e+00
   2.0393729e+01  -2.6331930e+01   4.0000000e+02   3.1947032e-01  -2.0807085e+00  -1.8772130e+00
   2.0478713e+01  -2.6435937e+01   4.0000000e+02   1.2993757e-01  -2.0153600e+00  -2.0018812e+00
   2.0570170e+01  -2.6535500e+01   4.0000000e+02  -5.7093383e-02  -1.9397187e+00  -2.1132363e+00
   2.0667823e+01  -2.6630299e+01   4.0000000e+02  -2.4068203e-01  -1.8534593e+00  -2.2106578e+00
   2.0771375e+01  -2.6720030e+01   4.0000000e+02  -4.1987026e-01  -1.7564888e+00  -2.2936074e+00
   2.0880505e+01  -2.6804403e+01   4.0000000e+02  -5.9366243e-01  -1.6489555e+00  -2.3616027e+00
   2.0994874e+01  -2.6883145e+01   4.0000000e+02  -7.6104172e-01  -1.5312419e+00  -2.4142065e+00
   2.1114122e+01  -2.6956002e+01   4.0000000e+02  -9.2100137e-01  -1.4039555e+00  -2.4510175e+00
   2.1237872e+01  -2.7022735e+01   4.0000000e+02  -1.0725853e+00  -1.2679152e+00  -2.4716885e+00
   2.1365730e+01  -2.7083129e+01   4.0000000e+02  -1.2149501e+00  -1.1241339e+00  -2.4759488e+00
   2.1497286e+01  -2.7136986e+01   4.0000000e+02  -1.3474037e+00  -9.7381285e-01  -2.4636570e+00
   2.1632116e+01  -2.7184130e+01   4.0000000e+02  -1.4694523e+00  -8.1833133e-01  -2.4348556e+00
   2.1769783e+01  -2.7224407e+01   4.0000000e+02  -1.5808254e+00  -6.5924139e-01  -2.3898335e+00
   2.1909840e+01  -2.7257685e+01   4.0000000e+02  -1.6814876e+00  -4.9825705e-01  -2.3291861e+00
   2.2051831e+01  -2.7283854e+01   4.0000000e+02  -1.7716330e+00  -3.3723667e-01  -2.2538619e+00
   2.2195291e+01  -2.7302829e+01   4.0000000e+02  -1.8516683e+00  -1.7815093e-01  -2.1651860e+00
   2.2339751e+01  -2.7314548e+01   4.0000000e+02  -1.9221807e+00  -2.3030912e-02  -2.0648638e+00
   2.2484736e+01  -2.7318972e+01   4.0000000e+02  -1.9838965e+00   1.2609514e-01  -1.9549565e+00
   2.2629772e+01  -2.7316086e+01   4.0000000e+02  -2.0376393e+00   2.6728867e-01  -1.8378233e+00
   2.2774382e+01  -2.7305899e+01   4.0000000e+02  -2.0842801e+00   3.9878272e-01  -1.7160494e+00
   2.2918092e+01  -2.7288447e+01   4.0000000e+02  -2.1246949e+00   5.1907228e-01  -1.5923456e+00
   2.3060430e+01  -2.7263784e+01   4.0000000e+02  -2.1597156e+00   6.2697987e-01  -1.4694686e+00
   2.3200932e+01  -2.7231994e+01   4.0000000e+02  -2.1901030e+00   7.2171344e-01  -1.3500990e+00
   2.3339140e+01  -2.7193180e+01   4.0000000e+02  -2.2165120e+00   8.0287939e-01  -1.2367795e+00
   2.3474603e+01  -2.7147468e+01   4.0000000e+02  -2.2394746e+00   8.7047417e-01  -1.1318421e+00
   2.3606883e+01  -2.7095010e+01   4.0000000e+02  -2.2593936e+00   9.2484908e-01  -1.0373487e+00
   2.3735554e+01  -2.7035976e+01   4.0000000e+02  -2.2765376e+00   9.6664286e-01  -9.5508085e-01
   2.3860202e+01  -2.6970559e+01   4.0000000e+02  -2.2910484e+00   9.9670497e-01  -8.8652225e-01
   2.3980429e+01  -2.6898972e+01   4.0000000e+02  -2.3029528e+00   1.0160115e+00  -8.3286111e-01
   2.4095855e+01  -2.6821447e+01   4.0000000e+02  -2.3121762e+00   1.0255825e+00  -7.9499814e-01
   2.4206117e+01  -2.6738237e+01   4.0000000e+02  -2.3185574e+00   1.0264088e+00  -7.7355547e-01
   2.4310869e+01  -2.6649610e+01   4.0000000e+02  -2.3218589e+00   1.0193917e+00  -7.6889675e-01
   2.4409789e+01  -2.6555852e+01   4.0000000e+02  -2.3217803e+00   1.0053036e+00  -7.8111714e-01
   2.4502573e+01  -2.6457265e+01   4.0000000e+02  -2.3179624e+00   9.8476149e-01  -8.1005951e-01
   2.4588941e+01  -2.6354166e+01   4.0000000e+02  -2.3099924e+00   9.5821924e-01  -8.5530943e-01
   2.4668634e+01  -2.6246885e+01   4.0000000e+02  -2.2974054e+00   9.2597013e-01  -9.1620695e-01
   2.4741417e+01  -2.6135763e+01   4.0000000e+02  -2.2796881e+00   8.8815940e-01  -9.9185306e-01
   2.4807080e+01  -2.6021155e+01   4.0000000e+02  -2.2562877e+00   8.4480366e-01  -1.0811173e+00
   2.4865436e+01  -2.5903424e+01   4.0000000e+02  -2.2266215e+00   7.9580764e-01  -1.1826711e+00
   2.4916324e+01  -2.5782941e+01   4.0000000e+02  -2.1900971e+00   7.4098367e-01  -1.2950100e+00
   2.4959606e+01  -2.5660088e+01   4.0000000e+02  -2.1461392e+00   6.8007040e-01  -1.4164851e+00
   2.4995171e+01  -2.5535249e+01   4.0000000e+02  -2.0942183e+00   6.1274481e-01  -1.5453429e+00
   2.5022932e+01  -2.5408816e+01   4.0000000e+02  -2.0338888e+00   5.3864084e-01  -1.6797505e+00
   2.5042827e+01  -2.5281183e+01   4.0000000e+02  -1.9648217e+00   4.5736356e-01  -1.8178252e+00
   2.5054820e+01  -2.5152747e+01   4.0000000e+02  -1.8868405e+00   3.6851067e-01  -1.9576447e+00
   2.5058898e+01  -2.5023907e+01   4.0000000e+02  -1.7999474e+00   2.7169625e-01  -2.0972546e+00
   2.5055074e+01  -2.4895061e+01   4.0000000e+02  -1.7043439e+00   1.6657904e-01  -2.2346605e+00
   2.5043384e+01  -2.4766605e+01   4.0000000e+02  -1.6004401e+00   5.2893409e-02  -2.3678200e+00
   2.5023889e+01  -2.4638934e+01   4.0000000e+02  -1.4888582e+00  -6.9515014e-02  -2.4946264e+00
   2.4996672e+01  -2.4512440e+01   4.0000000e+02  -1.3704186e+00  -2.0066030e-01  -2.6129091e+00
   2.4961839e+01  -2.4387508e+01   4.0000000e+02  -1.2461189e+00  -3.4039323e-01  -2.7204444e+00
   2.4919517e+01  -2.4264519e+01   4.0000000e+02  -1.1171047e+00  -4.8838185e-01  -2.8149822e+00
   2.4869858e+01  -2.4143846e+01   4.0000000e+02  -9.8463486e-01  -6.4410531e-01  -2.8942955e+00
   2.4813030e+01  -2.4025855e+01   4.0000000e+02  -8.5003238e-01  -8.0686257e-01  -2.9562522e+00
   2.4749225e+01  -2.3910902e+01   4.0000000e+02  -7.1464663e-01  -9.7578426e-01  -2.9988929e+00
   2.4678653e+01  -2.3799333e+01   4.0000000e+02  -5.7980536e-01  -1.1498592e+00  -3.0205207e+00
   2.4601542e+01  -2.3691484e+01   4.0000000e+02  -4.4677573e-01  -1.3279621e+00  -3.0197819e+00
   2.4518139e+01  -2.3587677e+01   4.0000000e+02  -3.1672970e-01  -1.5088869e+00  -2.9957349e+00
   2.4428707e+01  -2.3488223e+01   4.0000000e+02  -1.9071578e-01  -1.6913745e+00  -2.9478957e+00
   2.4333526e+01  -2.3393420e+01   4.0000000e+02  -6.9637562e-02  -1.8741400e+00  -2.8762574e+00
   2.4232891e+01  -2.3303550e+01   4.0000000e+02   4.5765608e-02  -2.0558987e+00  -2.7812781e+00
   2.4127110e+01  -2.3218880e+01   4.0000000e+02   1.5493281e-01  -2.2353830e+00  -2.6638411e+00
   2.4016507e+01  -2.3139661e+01   4.0000000e+02   2.5749023e-01  -2.4113502e+00  -2.5251947e+00
   2.3901417e+01  -2.3066128e+01   4.0000000e+02   3.5326522e-01  -2.5825922e+00  -2.3668727e+00
   2.3782186e+01  -2.2998499e+01   4.0000000e+02   4.4229365e-01  -2.7479358e+00  -2.1906089e+00
   2.3659173e+01  -2.2936974e+01   4.0000000e+02   5.2482217e-01  -2.9062359e+00  -1.9982582e+00
   2.3532744e+01  -2.2881734e+01   4.0000000e+02   6.0131030e-01  -3.0563723e+00  -1.7917196e+00
   2.3403276e+01  -2.2832943e+01   4.0000000e+02   6.7241780e-01  -3.1972331e+00  -1.5728907e+00
   2.3271152e+01  -2.2790743e+01   4.0000000e+02   7.3898728e-01  -3.3277118e+00  -1.3436262e+00
   2.3136763e+01  -2.2755261e+01   4.0000000e+02   8.0201515e-01  -3.4466948e+00  -1.1057391e+00
   2.3000505e+01  -2.2726598e+01   4.0000000e+02   8.6260970e-01  -3.5530723e+00  -8.6099649e-01
   2.2862778e+01  -2.2704841e+01   4.0000000e+02   9.2194866e-01  -3.6457466e+00  -6.1115635e-01
   2.2723987e+01  -2.2690053e+01   4.0000000e+02   9.8122007e-01  -3.7236670e+00  -3.5799451e-01
   2.2584540e+01  -2.2682277e+01   4.0000000e+02   1.0415677e+00  -3.7858754e+00  -1.0334518e-01
   2.2444845e+01  -2.2681537e+01   4.0000000e+02   1.1040356e+00  -3.8315683e+00   1.5086531e-01
   2.2305312e+01  -2.2687833e+01   4.0000000e+02   1.1695084e+00  -3.8601698e+00   4.0258854e-01
   2.2166349e+01  -2.2701149e+01   4.0000000e+02   1.2386698e+00  -3.8714034e+00   6.4962850e-01
   2.2028364e+01  -2.2721445e+01   4.0000000e+02   1.3119552e+00  -3.8653632e+00   8.8963425e-01
   2.1891764e+01  -2.2748660e+01   4.0000000e+02   1.3895254e+00  -3.8425641e+00   1.1200981e+00
   2.1756948e+01  -2.2782716e+01   4.0000000e+02   1.4712589e+00  -3.8039647e+00   1.3383780e+00
   2.1624315e+01  -2.2823512e+01   4.0000000e+02   1.5567451e+00  -3.7509615e+00   1.5417200e+00
   2.1494256e+01  -2.2870928e+01   4.0000000e+02   1.6453101e+00  -3.6853423e+00   1.7273166e+00
   2.1367156e+01  -2.2924823e+01   4.0000000e+02   1.7360492e+00  -3.6092094e+00   1.8923743e+00
   2.1243394e+01  -2.2985041e+01   4.0000000e+02   1.8278811e+00  -3.5248736e+00   2.0341921e+00
   2.1123337e+01  -2.3051401e+01   4.0000000e+02   1.9195969e+00  -3.4347352e+00   2.1502942e+00
   2.1007347e+01  -2.3123709e+01   4.0000000e+02   2.0099283e+00  -3.3411625e+00   2.2385176e+00
   2.0895771e+01  -2.3201751e+01   4.0000000e+02   2.0975967e+00  -3.2463781e+00   2.2971655e+00
   2.0788949e+01  -2.3285295e+01   4.0000000e+02   2.1813538e+00  -3.1523754e+00   2.3251082e+00
   2.0687205e+01  -2.3374093e+01   4.0000000e+02   2.2600076e+00  -3.0608537e+00   2.3218952e+00
   2.0590851e+01  -2.3467881e+01   4.0000000e+02   2.3324239e+00  -2.9731941e+00   2.2878137e+00
   2.0500185e+01  -2.3566380e+01   4.0000000e+02   2.3975105e+00  -2.8904602e+00   2.2239118e+00
   2.0415492e+01  -2.3669296e+01   4.0000000e+02   2.4541868e+00  -2.8134237e+00   2.1319666e+00
   2.0337036e+01  -2.3776322e+01   4.0000000e+02   2.5013503e+00  -2.7425960e+00   2.0144073e+00
   2.0265068e+01  -2.3887135e+01   4.0000000e+02   2.5378452e+00  -2.6782777e+00   1.8741751e+00
   1.9872619e+01  -2.4456908e+01   4.0000000e+02   2.5340849e+00  -2.3589569e+00   1.2242791e+00
   1.9843646e+01  -2.4582259e+01   4.0000000e+02   2.4862303e+00  -2.3364453e+00   1.0183667e+00
   1.9821870e+01  -2.4708814e+01   4.0000000e+02   2.4209870e+00  -2.3188841e+00   8.1087453e-01
   1.9807371e+01  -2.4836229e+01   4.0000000e+02   2.3382547e+00  -2.3055427e+00   6.0319039e-01
   1.9800211e+01  -2.4964157e+01   4.0000000e+02   2.2383830e+00  -2.2955867e+00   3.9638720e-01
   1.9800432e+01  -2.5092250e+01   4.0000000e+02   2.1221796e+00  -2.2880922e+00   1.9131378e-01
   1.9808056e+01  -2.5220157e+01   4.0000000e+02   1.9908822e+00  -2.2820658e+00  -1.1304688e-02
   1.9823087e+01  -2.5347527e+01   4.0000000e+02   1.8460868e+00  -2.2764652e+00  -2.1078603e-01
   1.9845505e+01  -2.5474009e+01   4.0000000e+02   1.6896490e+00  -2.2702153e+00  -4.0641133e-01
   1.9875274e+01  -2.5599254e+01   4.0000000e+02   1.5235634e+00  -2.2622269e+00  -5.9739760e-01
   1.9912332e+01  -2.5722915e+01   4.0000000e+02   1.3498454e+00  -2.2514056e+00  -7.8286580e-01
   1.9956600e+01  -2.5844648e+01   4.0000000e+02   1.1704211e+00  -2.2366658e+00  -9.6186776e-01
   2.0007978e+01  -2.5964113e+01   4.0000000e+02   9.8704478e-01  -2.2169406e+00  -1.1334103e+00
   2.0066343e+01  -2.6080976e+01   4.0000000e+02   8.0124829e-01  -2.1911956e+00  -1.2964938e+00
   2.0131552e+01  -2.6194910e+01   4.0000000e+02   6.1432777e-01  -2.1584490e+00  -1.4501593e+00
   2.0203442e+01  -2.6305592e+01   4.0000000e+02   4.2737038e-01  -2.1177972e+00  -1.5935228e+00
   2.0281830e+01  -2.6412711e+01   4.0000000e+02   2.4129078e-01  -2.0684411e+00  -1.7258017e+00
   2.0366512e+01  -2.6515963e+01   4.0000000e+02   5.6901708e-02  -2.0097189e+00  -1.8463188e+00
   2.0457264e+01  -2.6615054e+01   4.0000000e+02  -1.2502590e-01  -1.9411335e+00  -1.9544984e+00
   2.0553845e+01  -2.6709702e+01   4.0000000e+02  -3.0371184e-01  -1.8623741e+00  -2.0498507e+00
   2.0655992e+01  -2.6799637e+01   4.0000000e+02  -4.7832738e-01  -1.7733319e+00  -2.1319380e+00
   2.0763428e+01  -2.6884600e+01   4.0000000e+02  -6.4798335e-01  -1.6741021e+00  -2.2003584e+00
   2.0875855e+01  -2.6964348e+01   4.0000000e+02  -8.1174318e-01  -1.5649805e+00  -2.2547130e+00
   2.0992960e+01  -2.7038650e+01   4.0000000e+02  -9.6864919e-01  -1.4464518e+00  -2.2946041e+00
   2.1114417e+01  -2.7107293e+01   4.0000000e+02  -1.1177746e+00  -1.3191713e+00  -2.3196359e+00
   2.1239880e+01  -2.7170077e+01   4.0000000e+02  -1.2582623e+00  -1.1839604e+00  -2.3294354e+00
   2.1368996e+01  -2.7226821e+01   4.0000000e+02  -1.3893878e+00  -1.0417861e+00  -2.3236945e+00
   2.1501393e+01  -2.7277360e+01   4.0000000e+02  -1.5105897e+00  -8.9376965e-01  -2.3022187e+00
   2.1636693e+01  -2.7321546e+01   4.0000000e+02  -1.6215085e+00  -7.4117772e-01  -2.2649937e+00
   2.1774505e+01  -2.7359252e+01   4.0000000e+02  -1.7220026e+00  -5.8542939e-01  -2.2122412e+00
   2.1914431e+01  -2.7390367e+01   4.0000000e+02  -1.8121491e+00  -4.2809283e-01  -2.1444840e+00
   2.2056064e+01  -2.7414799e+01   4.0000000e+02  -1.8922352e+00  -2.7087565e-01  -2.0625876e+00
   2.2198993e+01  -2.7432479e+01   4.0000000e+02  -1.9627414e+00  -1.1559366e-01  -1.9677782e+00
   2.2342800e+01  -2.7443353e+01   4.0000000e+02  -2.0243034e+00   3.5864268e-02  -1.8616581e+00
   2.2487067e+01  -2.7447391e+01   4.0000000e+02  -2.0776840e+00   1.8160656e-01  -1.7461646e+00
   2.2631371e+01  -2.7444580e+01   4.0000000e+02  -2.1237253e+00   3.1980419e-01  -1.6235360e+00
   2.2775291e+01  -2.7434929e+01   4.0000000e+02  -2.1633123e+00   4.4878046e-01  -1.4962297e+00
   2.2918408e+01  -2.7418466e+01   4.0000000e+02  -2.1973290e+00   5.6708908e-01  -1.3668419e+00
   2.3060304e+01  -2.7395238e+01   4.0000000e+02  -2.2266207e+00   6.7358213e-01  -1.2380182e+00
   2.3200566e+01  -2.7365315e+01   4.0000000e+02  -2.2519638e+00   7.6746455e-01  -1.1123527e+00
   2.3338786e+01  -2.7328783e+01   4.0000000e+02  -2.2740363e+00   8.4831603e-01  -9.9231972e-01
   2.3474565e+01  -2.7285749e+01   4.0000000e+02  -2.2934031e+00   9.1609181e-01  -8.8019355e-01
   2.3607511e+01  -2.7236338e+01   4.0000000e+02  -2.3105032e+00   9.7108964e-01  -7.7801003e-01
   2.3737242e+01  -2.7180694e+01   4.0000000e+02  -2.3256490e+00   1.0138989e+00  -6.8753271e-01
   2.3863387e+01  -2.7118979e+01   4.0000000e+02  -2.3390301e+00   1.0453317e+00  -6.1024259e-01
   2.3985587e+01  -2.7051372e+01   4.0000000e+02  -2.3507226e+00   1.0663455e+00  -5.4734110e-01
   2.4103496e+01  -2.6978068e+01   4.0000000e+02  -2.3607019e+00   1.0779654e+00  -4.9976123e-01
   2.4216785e+01  -2.6899280e+01   4.0000000e+02  -2.3688584e+00   1.0812148e+00  -4.6817211e-01
   2.4325137e+01  -2.6815234e+01   4.0000000e+02  -2.3750083e+00   1.0770515e+00  -4.5300986e-01
   2.4428253e+01  -2.6726171e+01   4.0000000e+02  -2.3789061e+00   1.0663254e+00  -4.5447590e-01
   2.4525851e+01  -2.6632348e+01   4.0000000e+02  -2.3802532e+00   1.0497476e+00  -4.7254447e-01
   2.4617666e+01  -2.6534033e+01   4.0000000e+02  -2.3787002e+00   1.0278744e+00  -5.0697625e-01
   2.4703453e+01  -2.6431505e+01   4.0000000e+02  -2.3738497e+00   1.0011060e+00  -5.5731709e-01
   2.4782984e+01  -2.6325057e+01   4.0000000e+02  -2.3652562e+00   9.6969502e-01  -6.2290144e-01
   2.4856053e+01  -2.6214991e+01   4.0000000e+02  -2.3524279e+00   9.3376049e-01  -7.0286087e-01
   2.4922472e+01  -2.6101616e+01   4.0000000e+02  -2.3348279e+00   8.9330471e-01  -7.9614482e-01
   2.4982074e+01  -2.5985254e+01   4.0000000e+02  -2.3118865e+00   8.4823426e-01  -9.0152395e-01
   2.5034713e+01  -2.5866231e+01   4.0000000e+02  -2.2830127e+00   7.9837325e-01  -1.0176280e+00
   2.5080263e+01  -2.5744879e+01   4.0000000e+02  -2.2476154e+00   7.4347785e-01  -1.1429706e+00
   2.5118620e+01  -2.5621539e+01   4.0000000e+02  -2.2051322e+00   6.8324952e-01  -1.2759716e+00
   2.5149700e+01  -2.5496552e+01   4.0000000e+02  -2.1550550e+00   6.1734049e-01  -1.4150005e+00
   2.5173439e+01  -2.5370266e+01   4.0000000e+02  -2.0969645e+00   5.4536769e-01  -1.5583883e+00
   2.5189795e+01  -2.5243029e+01   4.0000000e+02  -2.0305590e+00   4.6692199e-01  -1.7044497e+00
   2.5198747e+01  -2.5115193e+01   4.0000000e+02  -1.9556831e+00   3.8158730e-01  -1.8514826e+00
   2.5200293e+01  -2.4987107e+01   4.0000000e+02  -1.8723442e+00   2.8895719e-01  -1.9977733e+00
   2.5194453e+01  -2.4859124e+01   4.0000000e+02  -1.7807337e+00   1.8866689e-01  -2.1415697e+00
   2.5181265e+01  -2.4731592e+01   4.0000000e+02  -1.6812257e+00   8.0415669e-02  -2.2810762e+00
   2.5160787e+01  -2.4604858e+01   4.0000000e+02  -1.5743795e+00  -3.5998725e-02  -2.4144294e+00
   2.5133098e+01  -2.4479266e+01   4.0000000e+02  -1.4609313e+00  -1.6065137e-01  -2.5396890e+00
   2.5098292e+01  -2.4355155e+01   4.0000000e+02  -1.3417708e+00  -2.9346990e-01  -2.6548476e+00
   2.5056485e+01  -2.4232861e+01   4.0000000e+02  -1.2179255e+00  -4.3421222e-01  -2.7578453e+00
   2.5007809e+01  -2.4112712e+01   4.0000000e+02  -1.0905232e+00  -5.8246614e-01  -2.8466185e+00
   2.4952412e+01  -2.3995031e+01   4.0000000e+02  -9.6076104e-01  -7.3764930e-01  -2.9191570e+00
   2.4890461e+01  -2.3880133e+01   4.0000000e+02  -8.2987106e-01  -8.9902180e-01  -2.9735765e+00
   2.4822137e+01  -2.3768323e+01   4.0000000e+02  -6.9907941e-01  -1.0657112e+00  -3.0082009e+00
   2.4747639e+01  -2.3659901e+01   4.0000000e+02  -5.6958043e-01  -1.2367294e+00  -3.0216377e+00
   2.4667178e+01  -2.3555153e+01   4.0000000e+02  -4.4249698e-01  -1.4110132e+00  -3.0128486e+00
   2.4580981e+01  -2.3454357e+01   4.0000000e+02  -3.1886377e-01  -1.5874427e+00  -2.9811981e+00
   2.4489288e+01  -2.3357781e+01   4.0000000e+02  -1.9960387e-01  -1.7648697e+00  -2.9264828e+00
   2.4392353e+01  -2.3265678e+01   4.0000000e+02  -8.5512304e-02  -1.9421434e+00  -2.8489312e+00
   2.4290440e+01  -2.3178292e+01   4.0000000e+02   2.2758469e-02  -2.1181244e+00  -2.7491810e+00
   2.4183827e+01  -2.3095853e+01   4.0000000e+02   1.2470893e-01  -2.2916974e+00  -2.6282317e+00
   2.4072800e+01  -2.3018576e+01   4.0000000e+02   2.2000919e-01  -2.4617850e+00  -2.4873760e+00
   2.3957657e+01  -2.2946665e+01   4.0000000e+02   3.0850652e-01  -2.6273416e+00  -2.3281287e+00
   2.3838706e+01  -2.2880307e+01   4.0000000e+02   3.9023758e-01  -2.7873580e+00  -2.1521434e+00
   2.3716262e+01  -2.2819677e+01   4.0000000e+02   4.6543710e-01  -2.9408521e+00  -1.9611395e+00
   2.3590649e+01  -2.2764933e+01   4.0000000e+02   5.3453722e-01  -3.0868590e+00  -1.7568391e+00
   2.3462196e+01  -2.2716217e+01   4.0000000e+02   5.9816335e-01  -3.2244197e+00  -1.5409185e+00
   2.3331240e+01  -2.2673656e+01   4.0000000e+02   6.5711719e-01  -3.3525628e+00  -1.3149892e+00
   2.3198125e+01  -2.2637362e+01   4.0000000e+02   7.1235342e-01  -3.4702945e+00  -1.0805941e+00
   2.3063198e+01  -2.2607429e+01   4.0000000e+02   7.6494730e-01  -3.5765990e+00  -8.3921365e-01
   2.2926808e+01  -2.2583934e+01   4.0000000e+02   8.1605423e-01  -3.6704441e+00  -5.9229322e-01
   2.2789312e+01  -2.2566939e+01   4.0000000e+02   8.6686177e-01  -3.7507969e+00  -3.4129205e-01
   2.2651066e+01  -2.2556488e+01   4.0000000e+02   9.1854273e-01  -3.8166673e+00  -8.7706403e-02
   2.2512428e+01  -2.2552608e+01   4.0000000e+02   9.7220328e-01  -3.8671564e+00   1.6688606e-01
   2.2373758e+01  -2.2555309e+01   4.0000000e+02   1.0288334e+00  -3.9015216e+00   4.2079237e-01
   2.2235415e+01  -2.2564584e+01   4.0000000e+02   1.0892619e+00  -3.9192493e+00   6.7218377e-01
   2.2097758e+01  -2.2580409e+01   4.0000000e+02   1.1541149e+00  -3.9201260e+00   9.1907702e-01
   2.1961144e+01  -2.2602743e+01   4.0000000e+02   1.2237838e+00  -3.9043018e+00   1.1593311e+00
   2.1825929e+01  -2.2631528e+01   4.0000000e+02   1.2984012e+00  -3.8723343e+00   1.3906490e+00
   2.1692463e+01  -2.2666689e+01   4.0000000e+02   1.3778318e+00  -3.8252067e+00   1.6106019e+00
   2.1561096e+01  -2.2708134e+01   4.0000000e+02   1.4616724e+00  -3.7643157e+00   1.8166451e+00
   2.1432169e+01  -2.2755756e+01   4.0000000e+02   1.5492751e+00  -3.6914228e+00   2.0061749e+00
   2.1306022e+01  -2.2809431e+01   4.0000000e+02   1.6397732e+00  -3.6085826e+00   2.1765720e+00
   2.1182986e+01  -2.2869017e+01   4.0000000e+02   1.7321272e+00  -3.5180405e+00   2.3252926e+00
   2.1063386e+01  -2.2934361e+01   4.0000000e+02   1.8251831e+00  -3.4221209e+00   2.4499417e+00
   2.0947538e+01  -2.3005290e+01   4.0000000e+02   1.9177190e+00  -3.3231152e+00   2.5483939e+00
   2.0835752e+01  -2.3081620e+01   4.0000000e+02   2.0085056e+00  -3.2231800e+00   2.6188839e+00
   2.0728326e+01  -2.3163150e+01   4.0000000e+02   2.0963438e+00  -3.1242516e+00   2.6601346e+00
   2.0625550e+01  -2.3249666e+01   4.0000000e+02   2.1800951e+00  -3.0279938e+00   2.6714409e+00
   2.0527703e+01  -2.3340941e+01   4.0000000e+02   2.2586907e+00  -2.9357687e+00   2.6527489e+00
   2.0435052e+01  -2.3436734e+01   4.0000000e+02   2.3311212e+00  -2.8486371e+00   2.6046996e+00
   2.0347853e+01  -2.3536793e+01   4.0000000e+02   2.3964121e+00  -2.7673813e+00   2.5286193e+00
   2.0266347e+01  -2.3640853e+01   4.0000000e+02   2.4535878e+00  -2.6925384e+00   2.4264817e+00
   2.0190764e+01  -2.3748638e+01   4.0000000e+02   2.5016355e+00  -2.6244454e+00   2.3008020e+00
   2.0121319e+01  -2.3859862e+01   4.0000000e+02   2.5394773e+00  -2.5632755e+00   2.1545071e+00
   2.0058212e+01  -2.3974230e+01   4.0000000e+02   2.5659599e+00  -2.5090704e+00   1.9907715e+00
   2.0001628e+01  -2.4091435e+01   4.0000000e+02   2.5798669e+00  -2.4617603e+00   1.8128513e+00
   1.9951736e+01  -2.4211165e+01   4.0000000e+02   2.5799616e+00  -2.4211732e+00   1.6239028e+00
   1.9908688e+01  -2.4333099e+01   4.0000000e+02   2.5650532e+00  -2.3870333e+00   1.4268506e+00
   1.9658258e+01  -2.4964135e+01   4.0000000e+02   2.2439973e+00  -2.2066067e+00   6.2474362e-01
   1.9658331e+01  -2.5092538e+01   4.0000000e+02   2.1298029e+00  -2.2054958e+00   4.2225607e-01
   1.9665471e+01  -2.5220779e+01   4.0000000e+02   2.0008017e+00  -2.2060423e+00   2.2224968e-01
   1.9679684e+01  -2.5348537e+01   4.0000000e+02   1.8585708e+00  -2.2072282e+00   2.5276930e-02
   1.9700956e+01  -2.5475495e+01   4.0000000e+02   1.7049331e+00  -2.2080180e+00  -1.6806619e-01
   1.9729257e+01  -2.5601333e+01   4.0000000e+02   1.5418514e+00  -2.2073758e+00  -3.5709778e-01
   1.9764537e+01  -2.5725737e+01   4.0000000e+02   1.3713003e+00  -2.2042729e+00  -5.4104207e-01
   1.9806729e+01  -2.5848391e+01   4.0000000e+02   1.1951696e+00  -2.1976959e+00  -7.1903732e-01
   1.9855750e+01  -2.5968986e+01   4.0000000e+02   1.0151677e+00  -2.1866513e+00  -8.9017696e-01
   1.9911494e+01  -2.6087216e+01   4.0000000e+02   8.3277640e-01  -2.1701707e+00  -1.0535347e+00
   1.9973842e+01  -2.6202779e+01   4.0000000e+02   6.4923051e-01  -2.1473250e+00  -1.2082250e+00
   2.0042654e+01  -2.6315381e+01   4.0000000e+02   4.6553113e-01  -2.1172386e+00  -1.3534295e+00
   2.0117773e+01  -2.6424733e+01   4.0000000e+02   2.8249423e-01  -2.0791139e+00  -1.4884276e+00
   2.0199024e+01  -2.6530553e+01   4.0000000e+02   1.0081090e-01  -2.0322578e+00  -1.6126073e+00
   2.0286214e+01  -2.6632570e+01   4.0000000e+02  -7.8888983e-02  -1.9761077e+00  -1.7254611e+00
   2.0379135e+01  -2.6730519e+01   4.0000000e+02  -2.5596692e-01  -1.9102577e+00  -1.8265712e+00
   2.0477561e+01  -2.6824146e+01   4.0000000e+02  -4.2973292e-01  -1.8344747e+00  -1.9155785e+00
   2.0581251e+01  -2.6913208e+01   4.0000000e+02  -5.9941906e-01  -1.7487074e+00  -1.9921529e+00
   2.0689946e+01  -2.6997472e+01   4.0000000e+02  -7.6417277e-01  -1.6530871e+00  -2.0559600e+00
   2.0803374e+01  -2.7076718e+01   4.0000000e+02  -9.2308146e-01  -1.5479159e+00  -2.1066415e+00
   2.0921248e+01  -2.7150738e+01   4.0000000e+02  -1.0752060e+00  -1.4336543e+00  -2.1438020e+00
   2.1043269e+01  -2.7219339e+01   4.0000000e+02  -1.2196328e+00  -1.3109024e+00  -2.1670132e+00
   2.1169124e+01  -2.7282339e+01   4.0000000e+02  -1.3555183e+00  -1.1803919e+00  -2.1758376e+00
   2.1298486e+01  -2.7339571e+01   4.0000000e+02  -1.4821421e+00  -1.0429779e+00  -2.1698650e+00
   2.1431022e+01  -2.7390886e+01   4.0000000e+02  -1.5989539e+00  -8.9963203e-01  -2.1487652e+00
   2.1566384e+01  -2.7436147e+01   4.0000000e+02  -1.7055904e+00  -7.5146116e-01  -2.1123530e+00
   2.1704218e+01  -2.7475234e+01   4.0000000e+02  -1.8019018e+00  -5.9970722e-01  -2.0606524e+00
   2.1844161e+01  -2.7508043e+01   4.0000000e+02  -1.8879512e+00  -4.4575934e-01  -1.9939585e+00
   2.1985845e+01  -2.7534487e+01   4.0000000e+02  -1.9640091e+00  -2.9115060e-01  -1.9128880e+00
   2.2128894e+01  -2.7554495e+01   4.0000000e+02  -2.0305321e+00  -1.3754951e-01  -1.8184163e+00
   2.2272929e+01  -2.7568015e+01   4.0000000e+02  -2.0881404e+00   1.3275477e-02  -1.7118864e+00
   2.2417568e+01  -2.7575011e+01   4.0000000e+02  -2.1375831e+00   1.5950250e-01  -1.5950028e+00
   2.2562425e+01  -2.7575463e+01   4.0000000e+02  -2.1797010e+00   2.9932018e-01  -1.4697983e+00
   2.2707117e+01  -2.7569371e+01   4.0000000e+02  -2.2153932e+00   4.3101225e-01  -1.3385653e+00
   2.2851258e+01  -2.7556750e+01   4.0000000e+02  -2.2455727e+00   5.5303079e-01  -1.2037942e+00
   2.2994466e+01  -2.7537635e+01   4.0000000e+02  -2.2711348e+00   6.6408020e-01  -1.0680725e+00
   2.3136361e+01  -2.7512076e+01   4.0000000e+02  -2.2929200e+00   7.6317596e-01  -9.3400456e-01
   2.3276567e+01  -2.7480142e+01   4.0000000e+02  -2.3116880e+00   8.4968848e-01  -8.0411712e-01
   2.3414714e+01  -2.7441917e+01   4.0000000e+02  -2.3280950e+00   9.2335874e-01  -6.8078806e-01
   2.3550439e+01  -2.7397502e+01   4.0000000e+02  -2.3426794e+00   9.8428754e-01  -5.6618269e-01
   2.3683386e+01  -2.7347016e+01   4.0000000e+02  -2.3558551e+00   1.0328992e+00  -4.6221172e-01
   2.3813207e+01  -2.7290592e+01   4.0000000e+02  -2.3679103e+00   1.0698849e+00  -3.7051582e-01
   2.3939565e+01  -2.7228379e+01   4.0000000e+02  -2.3790149e+00   1.0961353e+00  -2.9245251e-01
   2.4062135e+01  -2.7160542e+01   4.0000000e+02  -2.3892305e+00   1.1126644e+00  -2.2910183e-01
   2.4180600e+01  -2.7087259e+01   4.0000000e+02  -2.3985231e+00   1.1205346e+00  -1.8129290e-01
   2.4294660e+01  -2.7008723e+01   4.0000000e+02  -2.4067791e+00   1.1207922e+00  -1.4960435e-01
   2.4404026e+01  -2.6925139e+01   4.0000000e+02  -2.4138173e+00   1.1144098e+00  -1.3439627e-01
   2.4508422e+01  -2.6836727e+01   4.0000000e+02  -2.4194003e+00   1.1022461e+00  -1.3581580e-01
   2.4607590e+01  -2.6743716e+01   4.0000000e+02  -2.4232425e+00   1.0850186e+00  -1.5381086e-01
   2.4701285e+01  -2.6646349e+01   4.0000000e+02  -2.4250131e+00   1.0632914e+00  -1.8813544e-01
   2.4789280e+01  -2.6544879e+01   4.0000000e+02  -2.4243373e+00   1.0374744e+00  -2.3835401e-01
   2.4871364e+01  -2.6439568e+01   4.0000000e+02  -2.4207945e+00   1.0078319e+00  -3.0385032e-01
   2.4947340e+01  -2.6330687e+01   4.0000000e+02  -2.4139156e+00   9.7449839e-01  -3.8383563e-01
   2.5017033e+01  -2.6218517e+01   4.0000000e+02  -2.4031864e+00   9.3749707e-01  -4.7734475e-01
   2.5080283e+01  -2.6103346e+01   4.0000000e+02  -2.3880494e+00   8.9675799e-01  -5.8326443e-01
   2.5136947e+01  -2.5985467e+01   4.0000000e+02  -2.3679135e+00   8.5213382e-01  -7.0035185e-01
   2.5186903e+01  -2.5865180e+01   4.0000000e+02  -2.3421719e+00   8.0341373e-01  -8.2724902e-01
   2.5230044e+01  -2.5742792e+01   4.0000000e+02  -2.3102222e+00   7.5033333e-01  -9.6251666e-01
   2.5266284e+01  -2.5618612e+01   4.0000000e+02  -2.2714930e+00   6.9257940e-01  -1.1046611e+00
   2.5295552e+01  -2.5492953e+01   4.0000000e+02  -2.2254705e+00   6.2979594e-01  -1.2521624e+00
   2.5317797e+01  -2.5366131e+01   4.0000000e+02  -2.1717295e+00   5.6159001e-01  -1.4034886e+00
   2.5332986e+01  -2.5238464e+01   4.0000000e+02  -2.1099589e+00   4.8754024e-01  -1.5571096e+00
   2.5341104e+01  -2.5110271e+01   4.0000000e+02  -2.0399843e+00   4.0720966e-01  -1.7114982e+00
   2.5342152e+01  -2.4981871e+01   4.0000000e+02  -1.9617837e+00   3.2016352e-01  -1.8651224e+00
   2.5336150e+01  -2.4853584e+01   4.0000000e+02  -1.8755012e+00   2.2599450e-01  -2.0164224e+00
   2.5323136e+01  -2.4725725e+01   4.0000000e+02  -1.7814483e+00   1.2434671e-01  -2.1637940e+00
   2.5303161e+01  -2.4598612e+01   4.0000000e+02  -1.6801045e+00   1.4950244e-02  -2.3055613e+00
   2.5276298e+01  -2.4472555e+01   4.0000000e+02  -1.5721092e+00  -1.0235502e-01  -2.4399634e+00
   2.5242631e+01  -2.4347866e+01   4.0000000e+02  -1.4582482e+00  -2.2758931e-01  -2.5651503e+00
   2.5202263e+01  -2.4224848e+01   4.0000000e+02  -1.3394341e+00  -3.6062025e-01  -2.6791993e+00
   2.5155311e+01  -2.4103801e+01   4.0000000e+02  -1.2166840e+00  -5.0114930e-01  -2.7801460e+00
   2.5101907e+01  -2.3985020e+01   4.0000000e+02  -1.0910928e+00  -6.4871217e-01  -2.8660363e+00
   2.5042198e+01  -2.3868793e+01   4.0000000e+02  -9.6380268e-01  -8.0268922e-01  -2.9349934e+00
   2.4976345e+01  -2.3755401e+01   4.0000000e+02  -8.3597296e-01  -9.6232270e-01  -2.9852938e+00
   2.4904522e+01  -2.3645119e+01   4.0000000e+02  -7.0875074e-01  -1.1267389e+00  -3.0154435e+00
   2.4826917e+01  -2.3538210e+01   4.0000000e+02  -5.8324248e-01  -1.2949792e+00  -3.0242509e+00
   2.4743728e+01  -2.3434933e+01   4.0000000e+02  -4.6049210e-01  -1.4660217e+00  -3.0108825e+00
   2.4655167e+01  -2.3335535e+01   4.0000000e+02  -3.4146180e-01  -1.6388107e+00  -2.9749029e+00
   2.4561458e+01  -2.3240254e+01   4.0000000e+02  -2.2701646e-01  -1.8122778e+00  -2.9162908e+00
   2.4462834e+01  -2.3149316e+01   4.0000000e+02  -1.1790660e-01  -1.9853648e+00  -2.8354290e+00
   2.4359540e+01  -2.3062940e+01   4.0000000e+02  -1.4759768e-02  -2.1570311e+00  -2.7330753e+00
   2.4251828e+01  -2.2981331e+01   4.0000000e+02   8.1938688e-02  -2.3262738e+00  -2.6103057e+00
   2.4139963e+01  -2.2904682e+01   4.0000000e+02   1.7185349e-01  -2.4921260e+00  -2.4684514e+00
   2.4024215e+01  -2.2833175e+01   4.0000000e+02   2.5481973e-01  -2.6536634e+00  -2.3090186e+00
   2.3904864e+01  -2.2766980e+01   4.0000000e+02   3.3085180e-01  -2.8099964e+00  -2.1336151e+00
   2.3782195e+01  -2.2706254e+01   4.0000000e+02   4.0015622e-01  -2.9602669e+00  -1.9438743e+00
   2.3656504e+01  -2.2651139e+01   4.0000000e+02   4.6313085e-01  -3.1036296e+00  -1.7414025e+00
   2.3528089e+01  -2.2601767e+01   4.0000000e+02   5.2036804e-01  -3.2392406e+00  -1.5277318e+00
   2.3397254e+01  -2.2558253e+01   4.0000000e+02   5.7263782e-01  -3.3662393e+00  -1.3042989e+00
   2.3264310e+01  -2.2520700e+01   4.0000000e+02   6.2086761e-01  -3.4837289e+00  -1.0724498e+00
   2.3129570e+01  -2.2489197e+01   4.0000000e+02   6.6611495e-01  -3.5907707e+00  -8.3344913e-01
   2.2993353e+01  -2.2463818e+01   4.0000000e+02   7.0952846e-01  -3.6863803e+00  -5.8851641e-01
   2.2855977e+01  -2.2444622e+01   4.0000000e+02   7.5230917e-01  -3.7695444e+00  -3.3885431e-01
   2.2717767e+01  -2.2431654e+01   4.0000000e+02   7.9566310e-01  -3.8392423e+00  -8.5705897e-02
   2.2579046e+01  -2.2424946e+01   4.0000000e+02   8.4076009e-01  -3.8944950e+00   1.6961822e-01
   2.2440140e+01  -2.2424512e+01   4.0000000e+02   8.8868229e-01  -3.9344224e+00   4.2570003e-01
   2.2301374e+01  -2.2430354e+01   4.0000000e+02   9.4038701e-01  -3.9583118e+00   6.8098748e-01
   2.2163073e+01  -2.2442458e+01   4.0000000e+02   9.9666284e-01  -3.9656930e+00   9.3377724e-01
   2.2025563e+01  -2.2460796e+01   4.0000000e+02   1.0580961e+00  -3.9564085e+00   1.1822006e+00
   2.1889167e+01  -2.2485325e+01   4.0000000e+02   1.1250425e+00  -3.9306728e+00   1.4242308e+00
   2.1754204e+01  -2.2515986e+01   4.0000000e+02   1.1976065e+00  -3.8891111e+00   1.6576943e+00
   2.1620993e+01  -2.2552708e+01   4.0000000e+02   1.2756348e+00  -3.8327695e+00   1.8802748e+00
   2.1489849e+01  -2.2595404e+01   4.0000000e+02   1.3587165e+00  -3.7630975e+00   2.0895523e+00
   2.1361081e+01  -2.2643974e+01   4.0000000e+02   1.4462026e+00  -3.6818943e+00   2.2830409e+00
   2.1234995e+01  -2.2698303e+01   4.0000000e+02   1.5372330e+00  -3.5912329e+00   2.4582363e+00
   2.1111892e+01  -2.2758262e+01   4.0000000e+02   1.6307794e+00  -3.4933604e+00   2.6126822e+00
   2.0992065e+01  -2.2823711e+01   4.0000000e+02   1.7256985e+00  -3.3905863e+00   2.7440513e+00
   2.0875802e+01  -2.2894493e+01   4.0000000e+02   1.8207792e+00  -3.2851772e+00   2.8502372e+00
   2.0763384e+01  -2.2970442e+01   4.0000000e+02   1.9148033e+00  -3.1792565e+00   2.9294470e+00
   2.0655083e+01  -2.3051378e+01   4.0000000e+02   2.0065844e+00  -3.0747276e+00   2.9803120e+00
   2.0551163e+01  -2.3137108e+01   4.0000000e+02   2.0950002e+00  -2.9732219e+00   3.0019790e+00
   2.0451879e+01  -2.3227427e+01   4.0000000e+02   2.1790072e+00  -2.8760757e+00   2.9941876e+00
   2.0357477e+01  -2.3322122e+01   4.0000000e+02   2.2576392e+00  -2.7843314e+00   2.9573130e+00
   2.0268192e+01  -2.3420965e+01   4.0000000e+02   2.3299802e+00  -2.6987607e+00   2.8923967e+00
   2.0184248e+01  -2.3523721e+01   4.0000000e+02   2.3951362e+00  -2.6199004e+00   2.8011046e+00
   2.0105859e+01  -2.3630143e+01   4.0000000e+02   2.4521915e+00  -2.5480974e+00   2.6856651e+00
   2.0033225e+01  -2.3739975e+01   4.0000000e+02   2.5001744e+00  -2.4835452e+00   2.5487608e+00
   1.9966537e+01  -2.3852954e+01   4.0000000e+02   2.5380335e+00  -2.4263227e+00   2.3933760e+00
   1.9905970e+01  -2.3968805e+01   4.0000000e+02   2.5646305e+00  -2.3764088e+00   2.2226598e+00
   1.9851686e+01  -2.4087250e+01   4.0000000e+02   2.5787637e+00  -2.3336956e+00   2.0397399e+00
   1.9803834e+01  -2.4208001e+01   4.0000000e+02   2.5792124e+00  -2.2979869e+00   1.8475898e+00
   1.9762549e+01  -2.4330765e+01   4.0000000e+02   2.5648087e+00  -2.2689900e+00   1.6488968e+00
   1.9727950e+01  -2.4455242e+01   4.0000000e+02   2.5345249e+00  -2.2463036e+00   1.4459861e+00
   1.9700141e+01  -2.4581127e+01   4.0000000e+02   2.4875684e+00  -2.2294111e+00   1.2407755e+00
   1.9679211e+01  -2.4708114e+01   4.0000000e+02   2.4234697e+00  -2.2176789e+00   1.0347728e+00
   1.9665231e+01  -2.4835888e+01   4.0000000e+02   2.3421572e+00  -2.2103591e+00   8.2914036e-01
   1.9561507e+01  -2.5500819e+01   4.0000000e+02   1.6851952e+00  -2.1344979e+00   2.7997773e-02
   1.9589726e+01  -2.5626946e+01   4.0000000e+02   1.5239242e+00  -2.1404035e+00  -1.5764813e-01
   1.9624627e+01  -2.5751714e+01   4.0000000e+02   1.3557210e+00  -2.1439807e+00  -3.3840507e-01
   1.9666153e+01  -2.5874835e+01   4.0000000e+02   1.1824065e+00  -2.1442929e+00  -5.1348037e-01
   1.9714228e+01  -2.5996026e+01   4.0000000e+02   1.0056095e+00  -2.1404251e+00  -6.8202944e-01
   1.9768761e+01  -2.6115005e+01   4.0000000e+02   8.2672226e-01  -2.1314883e+00  -8.4320036e-01
   1.9829646e+01  -2.6231497e+01   4.0000000e+02   6.4687633e-01  -2.1166221e+00  -9.9618091e-01
   1.9896760e+01  -2.6345231e+01   4.0000000e+02   4.6696470e-01  -2.0950064e+00  -1.1402298e+00
   1.9969966e+01  -2.6455941e+01   4.0000000e+02   2.8768451e-01  -2.0658793e+00  -1.2747078e+00
   2.0049110e+01  -2.6563367e+01   4.0000000e+02   1.0960014e-01  -2.0285593e+00  -1.3990852e+00
   2.0134023e+01  -2.6667257e+01   4.0000000e+02  -6.6788758e-02  -1.9824709e+00  -1.5129411e+00
   2.0224521e+01  -2.6767366e+01   4.0000000e+02  -2.4097762e-01  -1.9271691e+00  -1.6159455e+00
   2.0320404e+01  -2.6863457e+01   4.0000000e+02  -4.1240273e-01  -1.8623595e+00  -1.7078302e+00
   2.0421461e+01  -2.6955302e+01   4.0000000e+02  -5.8040923e-01  -1.7879087e+00  -1.7883604e+00
   2.0527463e+01  -2.7042683e+01   4.0000000e+02  -7.4423709e-01  -1.7038482e+00  -1.8572896e+00
   2.0638171e+01  -2.7125392e+01   4.0000000e+02  -9.0303509e-01  -1.6103659e+00  -1.9143389e+00
   2.0753330e+01  -2.7203230e+01   4.0000000e+02  -1.0558866e+00  -1.5077949e+00  -1.9591685e+00
   2.0872674e+01  -2.7276011e+01   4.0000000e+02  -1.2018604e+00  -1.3965933e+00  -1.9913727e+00
   2.0995925e+01  -2.7343561e+01   4.0000000e+02  -1.3400590e+00  -1.2773287e+00  -2.0104861e+00
   2.1122795e+01  -2.7405716e+01   4.0000000e+02  -1.4696676e+00  -1.1506674e+00  -2.0160118e+00
   2.1252984e+01  -2.7462327e+01   4.0000000e+02  -1.5900040e+00  -1.0173696e+00  -2.0074564e+00
   2.1386183e+01  -2.7513257e+01   4.0000000e+02  -1.7005518e+00  -8.7829469e-01  -1.9843888e+00
   2.1522075e+01  -2.7558383e+01   4.0000000e+02  -1.8009876e+00  -7.3441209e-01  -1.9465013e+00
   2.1660335e+01  -2.7597595e+01   4.0000000e+02  -1.8911916e+00  -5.8681847e-01  -1.8936772e+00
   2.1800629e+01  -2.7630798e+01   4.0000000e+02  -1.9712497e+00  -4.3675398e-01  -1.8260527e+00
   2.1942620e+01  -2.7657911e+01   4.0000000e+02  -2.0414459e+00  -2.8560597e-01  -1.7440725e+00
   2.2085964e+01  -2.7678868e+01   4.0000000e+02  -2.1022439e+00  -1.3490869e-01  -1.6485282e+00
   2.2230314e+01  -2.7693619e+01   4.0000000e+02  -2.1542647e+00   1.3681491e-02  -1.5405770e+00
   2.2375319e+01  -2.7702127e+01   4.0000000e+02  -2.1982553e+00   1.5842392e-01  -1.4217448e+00
   2.2520628e+01  -2.7704372e+01   4.0000000e+02  -2.2350602e+00   2.9755688e-01  -1.2938921e+00
   2.2665886e+01  -2.7700348e+01   4.0000000e+02  -2.2655833e+00   4.2936495e-01  -1.1591748e+00
   2.2810741e+01  -2.7690065e+01   4.0000000e+02  -2.2907558e+00   5.5226591e-01  -1.0199684e+00
   2.2954841e+01  -2.7673548e+01   4.0000000e+02  -2.3114994e+00   6.6488604e-01  -8.7879181e-01
   2.3097836e+01  -2.7650838e+01   4.0000000e+02  -2.3286951e+00   7.6613083e-01  -7.3821584e-01
   2.3239380e+01  -2.7621989e+01   4.0000000e+02  -2.3431540e+00   8.5523676e-01  -6.0077905e-01
   2.3379131e+01  -2.7587071e+01   4.0000000e+02  -2.3555941e+00   9.3179918e-01  -4.6890245e-01
   2.3516752e+01  -2.7546171e+01   4.0000000e+02  -2.3666236e+00   9.9577467e-01  -3.4481998e-01
   2.3651913e+01  -2.7499386e+01   4.0000000e+02  -2.3767292e+00   1.0474572e+00  -2.3053918e-01
   2.3784289e+01  -2.7446830e+01   4.0000000e+02  -2.3862739e+00   1.0874334e+00  -1.2780131e-01
   2.3913567e+01  -2.7388631e+01   4.0000000e+02  -2.3954997e+00   1.1165228e+00  -3.8063686e-02
   2.4039440e+01  -2.7324929e+01   4.0000000e+02  -2.4045353e+00   1.1357057e+00   3.7485422e-02
   2.4161611e+01  -2.7255877e+01   4.0000000e+02  -2.4134084e+00   1.1460510e+00   9.7921690e-02
   2.4279795e+01  -2.7181642e+01   4.0000000e+02  -2.4220603e+00   1.1486484e+00   1.4257079e-01
   2.4393717e+01  -2.7102402e+01   4.0000000e+02  -2.4303598e+00   1.1445464e+00   1.7097912e-01
   2.4503114e+01  -2.7018346e+01   4.0000000e+02  -2.4381164e+00   1.1347047e+00   1.8289753e-01
   2.4607736e+01  -2.6929676e+01   4.0000000e+02  -2.4450906e+00   1.1199592e+00   1.7827039e-01
   2.4707347e+01  -2.6836603e+01   4.0000000e+02  -2.4510009e+00   1.1010001e+00   1.5721779e-01
   2.4801723e+01  -2.6739348e+01   4.0000000e+02  -2.4555256e+00   1.0783644e+00   1.2002617e-01
   2.4890655e+01  -2.6638142e+01   4.0000000e+02  -2.4583031e+00   1.0524381e+00   6.7147025e-02
   2.4973949e+01  -2.6533223e+01   4.0000000e+02  -2.4589282e+00   1.0234669e+00  -8.1298538e-04
   2.5051423e+01  -2.6424839e+01   4.0000000e+02  -2.4569488e+00   9.9157387e-01  -8.3095903e-02
   2.5122915e+01  -2.6313244e+01   4.0000000e+02  -2.4518651e+00   9.5677698e-01  -1.7879572e-01
   2.5188275e+01  -2.6198700e+01   4.0000000e+02  -2.4431305e+00   9.1900955e-01  -2.8687628e-01
   2.5247369e+01  -2.6081474e+01   4.0000000e+02  -2.4301586e+00   8.7813564e-01  -4.0618539e-01
   2.5300079e+01  -2.5961839e+01   4.0000000e+02  -2.4123367e+00   8.3396320e-01  -5.3547197e-01
   2.5346303e+01  -2.5840072e+01   4.0000000e+02  -2.3890438e+00   7.8625190e-01  -6.7341149e-01
   2.5385955e+01  -2.5716454e+01   4.0000000e+02  -2.3596743e+00   7.3471777e-01  -8.1863002e-01
   2.5418965e+01  -2.5591271e+01   4.0000000e+02  -2.3236643e+00   6.7903590e-01  -9.6972622e-01
   2.5445279e+01  -2.5464810e+01   4.0000000e+02  -2.2805176e+00   6.1884042e-01  -1.1252976e+00
   2.5464856e+01  -2.5337360e+01   4.0000000e+02  -2.2298297e+00   5.5372790e-01  -1.2839557e+00
   2.5477675e+01  -2.5209213e+01   4.0000000e+02  -2.1713136e+00   4.8326460e-01  -1.4443217e+00
   2.5483728e+01  -2.5080658e+01   4.0000000e+02  -2.1048114e+00   4.0699509e-01  -1.6050366e+00
   2.5483022e+01  -2.4951989e+01   4.0000000e+02  -2.0303113e+00   3.2446421e-01  -1.7647329e+00
   2.5475580e+01  -2.4823495e+01   4.0000000e+02  -1.9479496e+00   2.3523441e-01  -1.9220229e+00
   2.5461440e+01  -2.4695467e+01   4.0000000e+02  -1.8580164e+00   1.3891751e-01  -2.0754633e+00
   2.5440654e+01  -2.4568191e+01   4.0000000e+02  -1.7609483e+00   3.5199190e-02  -2.2235377e+00
   2.5413289e+01  -2.4441952e+01   4.0000000e+02  -1.6573249e+00  -7.6128991e-02  -2.3646320e+00
   2.5379424e+01  -2.4317033e+01   4.0000000e+02  -1.5478559e+00  -1.9514559e-01  -2.4970309e+00
   2.5339155e+01  -2.4193711e+01   4.0000000e+02  -1.4333685e+00  -3.2178148e-01  -2.6189276e+00
   2.5292589e+01  -2.4072260e+01   4.0000000e+02  -1.3147875e+00  -4.5580835e-01  -2.7284539e+00
   2.5239846e+01  -2.3952950e+01   4.0000000e+02  -1.1931155e+00  -5.9683692e-01  -2.8237262e+00
   2.5181059e+01  -2.3836043e+01   4.0000000e+02  -1.0694070e+00  -7.4432785e-01  -2.9029096e+00
   2.5116373e+01  -2.3721796e+01   4.0000000e+02  -9.4474538e-01  -8.9760464e-01  -2.9642872e+00
   2.5045945e+01  -2.3610462e+01   4.0000000e+02  -8.2021915e-01  -1.0558736e+00  -3.0063349e+00
   2.4969943e+01  -2.3502284e+01   4.0000000e+02  -6.9689445e-01  -1.2182551e+00  -3.0277942e+00
   2.4888547e+01  -2.3397498e+01   4.0000000e+02  -5.7579788e-01  -1.3838051e+00  -3.0277303e+00
   2.4801945e+01  -2.3296334e+01   4.0000000e+02  -4.5789593e-01  -1.5515427e+00  -3.0055763e+00
   2.4710338e+01  -2.3199011e+01   4.0000000e+02  -3.4408278e-01  -1.7204720e+00  -2.9611569e+00
   2.4613934e+01  -2.3105742e+01   4.0000000e+02  -2.3516407e-01  -1.8896018e+00  -2.8946892e+00
   2.4512952e+01  -2.3016728e+01   4.0000000e+02  -1.3184573e-01  -2.0579624e+00  -2.8067614e+00
   2.4407618e+01  -2.2932162e+01   4.0000000e+02  -3.4718565e-02  -2.2246166e+00  -2.6982910e+00
   2.4298167e+01  -2.2852228e+01   4.0000000e+02   5.5755499e-02  -2.3886663e+00  -2.5704676e+00
   2.4184843e+01  -2.2777097e+01   4.0000000e+02   1.3925995e-01  -2.5492592e+00  -2.4246817e+00
   2.4067894e+01  -2.2706932e+01   4.0000000e+02   2.1564292e-01  -2.7055878e+00  -2.2624477e+00
   2.3947577e+01  -2.2641884e+01   4.0000000e+02   2.8492805e-01  -2.8568828e+00  -2.0853325e+00
   2.3824154e+01  -2.2582093e+01   4.0000000e+02   3.4732745e-01  -3.0024042e+00  -1.8948868e+00
   2.3697894e+01  -2.2527687e+01   4.0000000e+02   4.0324435e-01  -3.1414244e+00  -1.6925947e+00
   2.3569070e+01  -2.2478782e+01   4.0000000e+02   4.5327106e-01  -3.2732111e+00  -1.4798362e+00
   2.3437960e+01  -2.2435485e+01   4.0000000e+02   4.9817746e-01  -3.3970038e+00  -1.2578763e+00
   2.3304846e+01  -2.2397887e+01   4.0000000e+02   5.3888825e-01  -3.5119983e+00  -1.0278637e+00
   2.3170014e+01  -2.2366070e+01   4.0000000e+02   5.7645768e-01  -3.6173285e+00  -7.9085878e-01
   2.3033751e+01  -2.2340100e+01   4.0000000e+02   6.1203318e-01  -3.7120656e+00  -5.4785847e-01
   2.2896351e+01  -2.2320035e+01   4.0000000e+02   6.4681963e-01  -3.7952182e+00  -2.9985555e-01
   2.2758106e+01  -2.2305916e+01   4.0000000e+02   6.8203668e-01  -3.8657638e+00  -4.7862152e-02
   2.2619311e+01  -2.2297773e+01   4.0000000e+02   7.1887946e-01  -3.9226812e+00   2.0703416e-01
   2.2480261e+01  -2.2295625e+01   4.0000000e+02   7.5847967e-01  -3.9650066e+00   4.6363860e-01
   2.2341254e+01  -2.2299476e+01   4.0000000e+02   8.0186218e-01  -3.9919004e+00   7.2061832e-01
   2.2202585e+01  -2.2309317e+01   4.0000000e+02   8.4991152e-01  -4.0027214e+00   9.7649262e-01
   2.2064549e+01  -2.2325128e+01   4.0000000e+02   9.0333942e-01  -3.9970996e+00   1.2296160e+00
   2.1927442e+01  -2.2346874e+01   4.0000000e+02   9.6265124e-01  -3.9750035e+00   1.4781777e+00
   2.1791557e+01  -2.2374510e+01   4.0000000e+02   1.0281288e+00  -3.9367892e+00   1.7202117e+00
   2.1657183e+01  -2.2407975e+01   4.0000000e+02   1.0998079e+00  -3.8832283e+00   1.9536163e+00
   2.1524609e+01  -2.2447199e+01   4.0000000e+02   1.1774785e+00  -3.8155053e+00   2.1761601e+00
   2.1394119e+01  -2.2492098e+01   4.0000000e+02   1.2606852e+00  -3.7351866e+00   2.3855232e+00
   2.1265995e+01  -2.2542575e+01   4.0000000e+02   1.3487440e+00  -3.6441601e+00   2.5793261e+00
   2.1140513e+01  -2.2598522e+01   4.0000000e+02   1.4407746e+00  -3.5445491e+00   2.7551816e+00
   2.1017944e+01  -2.2659819e+01   4.0000000e+02   1.5357394e+00  -3.4386115e+00   2.9107515e+00
   2.0898557e+01  -2.2726334e+01   4.0000000e+02   1.6324907e+00  -3.3286361e+00   3.0438106e+00
   2.0782611e+01  -2.2797925e+01   4.0000000e+02   1.7298265e+00  -3.2168333e+00   3.1523407e+00
   2.0670361e+01  -2.2874436e+01   4.0000000e+02   1.8265356e+00  -3.1052520e+00   3.2346135e+00
   2.0562055e+01  -2.2955703e+01   4.0000000e+02   1.9214489e+00  -2.9957079e+00   3.2892801e+00
   2.0457932e+01  -2.3041550e+01   4.0000000e+02   2.0134658e+00  -2.8897411e+00   3.3154670e+00
   2.0358227e+01  -2.3131792e+01   4.0000000e+02   2.1015736e+00  -2.7886042e+00   3.3128378e+00
   2.0263163e+01  -2.3226233e+01   4.0000000e+02   2.1848433e+00  -2.6932636e+00   3.2816603e+00
   2.0172956e+01  -2.3324668e+01   4.0000000e+02   2.2624121e+00  -2.6044319e+00   3.2228166e+00
   2.0087812e+01  -2.3426883e+01   4.0000000e+02   2.3334509e+00  -2.5226046e+00   3.1377916e+00
   2.0007928e+01  -2.3532655e+01   4.0000000e+02   2.3971245e+00  -2.4481045e+00   3.0286179e+00
   1.9933490e+01  -2.3641754e+01   4.0000000e+02   2.4525519e+00  -2.3811220e+00   2.8977824e+00
   1.9864676e+01  -2.3753940e+01   4.0000000e+02   2.4987741e+00  -2.3217495e+00   2.7481071e+00
   1.9801649e+01  -2.3868967e+01   4.0000000e+02   2.5347393e+00  -2.2699965e+00   2.5826062e+00
   1.9744563e+01  -2.3986583e+01   4.0000000e+02   2.5593098e+00  -2.2258032e+00   2.4043276e+00
   1.9693560e+01  -2.4106528e+01   4.0000000e+02   2.5712922e+00  -2.1890343e+00   2.2162159e+00
   1.9648769e+01  -2.4228537e+01   4.0000000e+02   2.5694937e+00  -2.1594673e+00   2.0209821e+00
   1.9610308e+01  -2.4352341e+01   4.0000000e+02   2.5527977e+00  -2.1367807e+00   1.8210042e+00
   1.9578279e+01  -2.4477663e+01   4.0000000e+02   2.5202520e+00  -2.1205358e+00   1.6182864e+00
   1.9552774e+01  -2.4604225e+01   4.0000000e+02   2.4711592e+00  -2.1101770e+00   1.4144218e+00
   1.9533868e+01  -2.4731743e+01   4.0000000e+02   2.4051590e+00  -2.1050258e+00   1.2106368e+00
   1.9521625e+01  -2.4859933e+01   4.0000000e+02   2.3222877e+00  -2.1042976e+00   1.0078277e+00
   1.9516092e+01  -2.4988506e+01   4.0000000e+02   2.2230133e+00  -2.1071149e+00   8.0665838e-01
   1.9517303e+01  -2.5117173e+01   4.0000000e+02   2.1082309e+00  -2.1125347e+00   6.0763511e-01
   1.9525276e+01  -2.5245641e+01   4.0000000e+02   1.9792284e+00  -2.1195722e+00   4.1120538e-01
   1.9540015e+01  -2.5373620e+01   4.0000000e+02   1.8376084e+00  -2.1272266e+00   2.1781970e-01
   1.9582278e+01  -2.6044625e+01   4.0000000e+02   9.6228961e-01  -2.0823430e+00  -5.0789629e-01
   1.9636798e+01  -2.6163869e+01   4.0000000e+02   7.8712042e-01  -2.0795128e+00  -6.6478668e-01
   1.9697417e+01  -2.6280740e+01   4.0000000e+02   6.1134295e-01  -2.0710293e+00  -8.1374742e-01
   1.9764025e+01  -2.6394989e+01   4.0000000e+02   4.3570875e-01  -2.0561399e+00  -9.5412915e-01
   1.9836497e+01  -2.6506371e+01   4.0000000e+02   2.6077798e-01  -2.0341358e+00  -1.0853858e+00
   1.9914695e+01  -2.6614647e+01   4.0000000e+02   8.6981665e-02  -2.0043718e+00  -1.2070871e+00
   1.9998467e+01  -2.6719585e+01   4.0000000e+02  -8.5306633e-02  -1.9662898e+00  -1.3189119e+00
   2.0087649e+01  -2.6820956e+01   4.0000000e+02  -2.5569668e-01  -1.9194448e+00  -1.4206322e+00
   2.0182062e+01  -2.6918543e+01   4.0000000e+02  -4.2373522e-01  -1.8635214e+00  -1.5120797e+00
   2.0281515e+01  -2.7012132e+01   4.0000000e+02  -5.8885692e-01  -1.7983516e+00  -1.5931163e+00
   2.0385805e+01  -2.7101520e+01   4.0000000e+02  -7.5037925e-01  -1.7239155e+00  -1.6635945e+00
   2.0494715e+01  -2.7186511e+01   4.0000000e+02  -9.0750316e-01  -1.6403385e+00  -1.7233219e+00
   2.0608019e+01  -2.7266919e+01   4.0000000e+02  -1.0593458e+00  -1.5478757e+00  -1.7720378e+00
   2.0725477e+01  -2.7342569e+01   4.0000000e+02  -1.2049801e+00  -1.4468949e+00  -1.8093905e+00
   2.0846840e+01  -2.7413292e+01   4.0000000e+02  -1.3434806e+00  -1.3378590e+00  -1.8349441e+00
   2.0971849e+01  -2.7478933e+01   4.0000000e+02  -1.4739833e+00  -1.2213068e+00  -1.8481839e+00
   2.1100234e+01  -2.7539347e+01   4.0000000e+02  -1.5957269e+00  -1.0978474e+00  -1.8485489e+00
   2.1231716e+01  -2.7594400e+01   4.0000000e+02  -1.7080943e+00  -9.6816051e-01  -1.8354765e+00
   2.1366011e+01  -2.7643970e+01   4.0000000e+02  -1.8106432e+00  -8.3300335e-01  -1.8084588e+00
   2.1502822e+01  -2.7687946e+01   4.0000000e+02  -1.9031194e+00  -6.9323639e-01  -1.7671050e+00
   2.1641851e+01  -2.7726231e+01   4.0000000e+02  -1.9854702e+00  -5.4983464e-01  -1.7112061e+00
   2.1782789e+01  -2.7758739e+01   4.0000000e+02  -2.0578347e+00  -4.0391904e-01  -1.6408007e+00
   2.1925324e+01  -2.7785398e+01   4.0000000e+02  -2.1205385e+00  -2.5676218e-01  -1.5562257e+00
   2.2069141e+01  -2.7806148e+01   4.0000000e+02  -2.1740744e+00  -1.0978995e-01  -1.4581584e+00
   2.2213918e+01  -2.7820943e+01   4.0000000e+02  -2.2190802e+00   3.5431341e-02  -1.3476379e+00
   2.2359334e+01  -2.7829750e+01   4.0000000e+02  -2.2563147e+00   1.7723793e-01  -1.2260657e+00
   2.2505064e+01  -2.7832548e+01   4.0000000e+02  -2.2866271e+00   3.1391796e-01  -1.0951888e+00
   2.2650783e+01  -2.7829332e+01   4.0000000e+02  -2.3109285e+00   4.4378576e-01  -9.5705022e-01
   2.2796165e+01  -2.7820109e+01   4.0000000e+02  -2.3301582e+00   5.6525829e-01  -8.1393491e-01
   2.2940886e+01  -2.7804899e+01   4.0000000e+02  -2.3452524e+00   6.7693730e-01  -6.6829038e-01
   2.3084624e+01  -2.7783737e+01   4.0000000e+02  -2.3571141e+00   7.7768069e-01  -5.2263852e-01
   2.3227059e+01  -2.7756669e+01   4.0000000e+02  -2.3665838e+00   8.6665747e-01  -3.7949656e-01
   2.3367874e+01  -2.7723757e+01   4.0000000e+02  -2.3744167e+00   9.4338329e-01  -2.4128623e-01
   2.3506758e+01  -2.7685074e+01   4.0000000e+02  -2.3812639e+00   1.0077307e+00  -1.1026836e-01
   2.3643404e+01  -2.7640706e+01   4.0000000e+02  -2.3876601e+00   1.0599126e+00   1.1512086e-02
   2.3777513e+01  -2.7590751e+01   4.0000000e+02  -2.3940180e+00   1.1004463e+00   1.2226620e-01
   2.3908790e+01  -2.7535322e+01   4.0000000e+02  -2.4006292e+00   1.1300973e+00   2.2047873e-01
   2.4036949e+01  -2.7474540e+01   4.0000000e+02  -2.4076699e+00   1.1498153e+00   3.0490517e-01
   2.4161713e+01  -2.7408541e+01   4.0000000e+02  -2.4152123e+00   1.1606640e+00   3.7457421e-01
   2.4282813e+01  -2.7337470e+01   4.0000000e+02  -2.4232375e+00   1.1637521e+00   4.2875702e-01
   2.4399990e+01  -2.7261485e+01   4.0000000e+02  -2.4316507e+00   1.1601720e+00   4.6695528e-01
   2.4512996e+01  -2.7180752e+01   4.0000000e+02  -2.4402951e+00   1.1509472e+00   4.8887110e-01
   2.4621593e+01  -2.7095449e+01   4.0000000e+02  -2.4489639e+00   1.1369933e+00   4.9439234e-01
   2.4725553e+01  -2.7005763e+01   4.0000000e+02  -2.4574096e+00   1.1190909e+00   4.8357069e-01
   2.4824663e+01  -2.6911889e+01   4.0000000e+02  -2.4653489e+00   1.0978710e+00   4.5661441e-01
   2.4918718e+01  -2.6814033e+01   4.0000000e+02  -2.4724633e+00   1.0738134e+00   4.1387466e-01
   2.5007530e+01  -2.6712406e+01   4.0000000e+02  -2.4783977e+00   1.0472516e+00   3.5584109e-01
   2.5090920e+01  -2.6607230e+01   4.0000000e+02  -2.4827546e+00   1.0183883e+00   2.8313641e-01
   2.5168725e+01  -2.6498730e+01   4.0000000e+02  -2.4850902e+00   9.8731178e-01   1.9650703e-01
   2.5240794e+01  -2.6387141e+01   4.0000000e+02  -2.4849113e+00   9.5401684e-01   9.6823911e-02
   2.5306989e+01  -2.6272702e+01   4.0000000e+02  -2.4816752e+00   9.1842340e-01  -1.4934770e-02
   2.5367188e+01  -2.6155658e+01   4.0000000e+02  -2.4747961e+00   8.8039223e-01  -1.3768790e-01
   2.5421281e+01  -2.6036259e+01   4.0000000e+02  -2.4636565e+00   8.3973771e-01  -2.7027319e-01
   2.5469171e+01  -2.5914758e+01   4.0000000e+02  -2.4476239e+00   7.9623445e-01  -4.1146744e-01
   2.5510778e+01  -2.5791412e+01   4.0000000e+02  -2.4260738e+00   7.4961976e-01  -5.6000100e-01
   2.5546034e+01  -2.5666483e+01   4.0000000e+02  -2.3984139e+00   6.9959474e-01  -7.1458356e-01
   2.5574885e+01  -2.5540232e+01   4.0000000e+02  -2.3641085e+00   6.4582016e-01  -8.7393069e-01
   2.5597291e+01  -2.5412926e+01   4.0000000e+02  -2.3227040e+00   5.8791796e-01  -1.0367680e+00
   2.5613226e+01  -2.5284830e+01   4.0000000e+02  -2.2738473e+00   5.2546986e-01  -1.2018510e+00
   2.5622677e+01  -2.5156210e+01   4.0000000e+02  -2.2173019e+00   4.5802469e-01  -1.3679598e+00
   2.5625646e+01  -2.5027335e+01   4.0000000e+02  -2.1529610e+00   3.8511155e-01  -1.5338831e+00
   2.5622147e+01  -2.4898470e+01   4.0000000e+02  -2.0808487e+00   3.0625409e-01  -1.6984099e+00
   2.5612207e+01  -2.4769883e+01   4.0000000e+02  -2.0011258e+00   2.2099782e-01  -1.8602920e+00
   2.5595867e+01  -2.4641837e+01   4.0000000e+02  -1.9140849e+00   1.2893275e-01  -2.0182228e+00
   2.5573179e+01  -2.4514596e+01   4.0000000e+02  -1.8201475e+00   2.9725931e-02  -2.1708059e+00
   2.5544210e+01  -2.4388419e+01   4.0000000e+02  -1.7198572e+00  -7.6853725e-02  -2.3165384e+00
   2.5509036e+01  -2.4263564e+01   4.0000000e+02  -1.6138701e+00  -1.9090957e-01  -2.4538059e+00
   2.5467747e+01  -2.4140284e+01   4.0000000e+02  -1.5029453e+00  -3.1240084e-01  -2.5808921e+00
   2.5420444e+01  -2.4018831e+01   4.0000000e+02  -1.3879325e+00  -4.4112991e-01  -2.6960065e+00
   2.5367238e+01  -2.3899449e+01   4.0000000e+02  -1.2697514e+00  -5.7674777e-01  -2.7973355e+00
   2.5308254e+01  -2.3782379e+01   4.0000000e+02  -1.1493797e+00  -7.1875517e-01  -2.8830962e+00
   2.5243625e+01  -2.3667857e+01   4.0000000e+02  -1.0278277e+00  -8.6652232e-01  -2.9516091e+00
   2.5173494e+01  -2.3556112e+01   4.0000000e+02  -9.0611867e-01  -1.0193107e+00  -3.0013693e+00
   2.5098015e+01  -2.3447369e+01   4.0000000e+02  -7.8527172e-01  -1.1762935e+00  -3.0311128e+00
   2.5017352e+01  -2.3341845e+01   4.0000000e+02  -6.6628144e-01  -1.3365843e+00  -3.0398771e+00
   2.4931676e+01  -2.3239751e+01   4.0000000e+02  -5.5010089e-01  -1.4992618e+00  -3.0270444e+00
   2.4841169e+01  -2.3141288e+01   4.0000000e+02  -4.3763010e-01  -1.6633917e+00  -2.9923674e+00
   2.4746020e+01  -2.3046654e+01   4.0000000e+02  -3.2970287e-01  -1.8280416e+00  -2.9359755e+00
   2.4646427e+01  -2.2956035e+01   4.0000000e+02  -2.2707280e-01  -1.9923029e+00  -2.8583598e+00
   2.4542595e+01  -2.2869611e+01   4.0000000e+02  -1.3039985e-01  -2.1552984e+00  -2.7603391e+00
   2.4434735e+01  -2.2787553e+01   4.0000000e+02  -4.0233172e-02  -2.3161949e+00  -2.6430073e+00
   2.4323068e+01  -2.2710022e+01   4.0000000e+02   4.3003407e-02  -2.4742050e+00  -2.5076721e+00
   2.4207817e+01  -2.2637172e+01   4.0000000e+02   1.1903524e-01  -2.6285934e+00  -2.3557788e+00
   2.4089216e+01  -2.2569145e+01   4.0000000e+02   1.8774815e-01  -2.7786697e+00  -2.1888424e+00
   2.3967500e+01  -2.2506075e+01   4.0000000e+02   2.4920940e-01  -2.9237852e+00  -2.0083713e+00
   2.3842912e+01  -2.2448087e+01   4.0000000e+02   3.0367262e-01  -3.0633149e+00  -1.8158160e+00
   2.3715699e+01  -2.2395293e+01   4.0000000e+02   3.5158151e-01  -3.1966433e+00  -1.6125184e+00
   2.3586111e+01  -2.2347797e+01   4.0000000e+02   3.9356506e-01  -3.3231406e+00  -1.3996889e+00
   2.3454405e+01  -2.2305692e+01   4.0000000e+02   4.3042083e-01  -3.4421366e+00  -1.1784047e+00
   2.3320837e+01  -2.2269060e+01   4.0000000e+02   4.6309623e-01  -3.5529044e+00  -9.4961163e-01
   2.3185671e+01  -2.2237973e+01   4.0000000e+02   4.9265690e-01  -3.6546365e+00  -7.1416738e-01
   2.3049170e+01  -2.2212492e+01   4.0000000e+02   5.2025696e-01  -3.7464439e+00  -4.7286762e-01
   2.2911600e+01  -2.2192666e+01   4.0000000e+02   5.4710105e-01  -3.8273583e+00  -2.2649788e-01
   2.2773229e+01  -2.2178534e+01   4.0000000e+02   5.7440949e-01  -3.8963523e+00   2.4118839e-02
   2.2634327e+01  -2.2170124e+01   4.0000000e+02   6.0338146e-01  -3.9523769e+00   2.7807882e-01
   2.2495164e+01  -2.2167452e+01   4.0000000e+02   6.3515935e-01  -3.9944143e+00   5.3436521e-01
   2.2356011e+01  -2.2170523e+01   4.0000000e+02   6.7079545e-01  -4.0215423e+00   7.9181820e-01
   2.2217137e+01  -2.2179331e+01   4.0000000e+02   7.1122059e-01  -4.0330082e+00   1.0491233e+00
   2.2078813e+01  -2.2193860e+01   4.0000000e+02   7.5721424e-01  -4.0283023e+00   1.3047957e+00
   2.1941309e+01  -2.2214080e+01   4.0000000e+02   8.0937335e-01  -4.0072291e+00   1.5571890e+00
   2.1804892e+01  -2.2239952e+01   4.0000000e+02   8.6809404e-01  -3.9699614e+00   1.8045039e+00
   2.1669828e+01  -2.2271426e+01   4.0000000e+02   9.3355013e-01  -3.9170762e+00   2.0447982e+00
   2.1536382e+01  -2.2308441e+01   4.0000000e+02   1.0056810e+00  -3.8495640e+00   2.2760053e+00
   2.1404814e+01  -2.2350923e+01   4.0000000e+02   1.0841865e+00  -3.7688087e+00   2.4959657e+00
   2.1275383e+01  -2.2398790e+01   4.0000000e+02   1.1685393e+00  -3.6765398e+00   2.7024429e+00
   2.1148344e+01  -2.2451949e+01   4.0000000e+02   1.2580002e+00  -3.5747589e+00   2.8931655e+00
   2.1023948e+01  -2.2510294e+01   4.0000000e+02   1.3516456e+00  -3.4656482e+00   3.0658722e+00
   2.0902441e+01  -2.2573713e+01   4.0000000e+02   1.4484160e+00  -3.3514669e+00   3.2183592e+00
   2.0784065e+01  -2.2642079e+01   4.0000000e+02   1.5471515e+00  -3.2344508e+00   3.3485506e+00
   2.0669056e+01  -2.2715259e+01   4.0000000e+02   1.6466540e+00  -3.1167166e+00   3.4545654e+00
   2.0557645e+01  -2.2793110e+01   4.0000000e+02   1.7457299e+00  -3.0001867e+00   3.5348004e+00
   2.0450059e+01  -2.2875477e+01   4.0000000e+02   1.8432298e+00  -2.8865370e+00   3.5880141e+00
   2.0346514e+01  -2.2962198e+01   4.0000000e+02   1.9380849e+00  -2.7771602e+00   3.6134111e+00
   2.0247223e+01  -2.3053101e+01   4.0000000e+02   2.0293175e+00  -2.6731709e+00   3.6107001e+00
   2.0152390e+01  -2.3148008e+01   4.0000000e+02   2.1160436e+00  -2.5754161e+00   3.5801444e+00
   2.0062213e+01  -2.3246729e+01   4.0000000e+02   2.1974482e+00  -2.4845126e+00   3.5225880e+00
   1.9976880e+01  -2.3349068e+01   4.0000000e+02   2.2727598e+00  -2.4008842e+00   3.4394389e+00
   1.9896571e+01  -2.3454823e+01   4.0000000e+02   2.3412098e+00  -2.3248094e+00   3.3326187e+00
   1.9821459e+01  -2.3563781e+01   4.0000000e+02   2.4019884e+00  -2.2564610e+00   3.2044908e+00
   1.9751705e+01  -2.3675726e+01   4.0000000e+02   2.4542149e+00  -2.1959317e+00   3.0577413e+00
   1.9687464e+01  -2.3790433e+01   4.0000000e+02   2.4969136e+00  -2.1432576e+00   2.8952546e+00
   1.9628877e+01  -2.3907671e+01   4.0000000e+02   2.5290134e+00  -2.0984142e+00   2.7199772e+00
   1.9576078e+01  -2.4027205e+01   4.0000000e+02   2.5493699e+00  -2.0613174e+00   2.5347693e+00
   1.9529189e+01  -2.4148793e+01   4.0000000e+02   2.5568090e+00  -2.0318028e+00   2.3422959e+00
   1.9488322e+01  -2.4272190e+01   4.0000000e+02   2.5501925e+00  -2.0096105e+00   2.1449204e+00
   1.9453576e+01  -2.4397145e+01   4.0000000e+02   2.5284978e+00  -1.9943651e+00   1.9446522e+00
   1.9425041e+01  -2.4523405e+01   4.0000000e+02   2.4909046e+00  -1.9855697e+00   1.7431086e+00
   1.9402792e+01  -2.4650711e+01   4.0000000e+02   2.4368777e+00  -1.9825977e+00   1.5415421e+00
   1.9386895e+01  -2.4778802e+01   4.0000000e+02   2.3662370e+00  -1.9847078e+00   1.3408680e+00
   1.9377401e+01  -2.4907418e+01   4.0000000e+02   2.2792004e+00  -1.9910561e+00   1.1417358e+00
   1.9374351e+01  -2.5036291e+01   4.0000000e+02   2.1764078e+00  -2.0007249e+00   9.4462011e-01
   1.9377770e+01  -2.5165157e+01   4.0000000e+02   2.0588956e+00  -2.0127473e+00   7.4989364e-01
   1.9387672e+01  -2.5293749e+01   4.0000000e+02   1.9280532e+00  -2.0261388e+00   5.5791043e-01
   1.9404057e+01  -2.5421799e+01   4.0000000e+02   1.7855434e+00  -2.0399196e+00   3.6906889e-01
   1.9426911e+01  -2.5549041e+01   4.0000000e+02   1.6332007e+00  -2.0531326e+00   1.8384942e-01
   1.9456209e+01  -2.5675208e+01   4.0000000e+02   1.4729253e+00  -2.0648550e+00   2.8315441e-03
   1.9491908e+01  -2.5800036e+01   4.0000000e+02   1.3065719e+00  -2.0741968e+00  -1.7330454e-01
   1.9533954e+01  -2.5923262e+01   4.0000000e+02   1.1358576e+00  -2.0803025e+00  -3.4380955e-01
   1.9714474e+01  -2.6573850e+01   4.0000000e+02   2.0880759e-01  -1.9880480e+00  -9.1646883e-01
   1.9792084e+01  -2.6681696e+01   4.0000000e+02   4.0973685e-02  -1.9645086e+00  -1.0324547e+00
   1.9874991e+01  -2.6786394e+01   4.0000000e+02  -1.2552920e-01  -1.9331461e+00  -1.1392413e+00
   1.9963048e+01  -2.6887738e+01   4.0000000e+02  -2.9041601e-01  -1.8935427e+00  -1.2367072e+00
   2.0056096e+01  -2.6985528e+01   4.0000000e+02  -4.5331942e-01  -1.8453958e+00  -1.3247882e+00
   2.0153966e+01  -2.7079572e+01   4.0000000e+02  -6.1375713e-01  -1.7885305e+00  -1.4034447e+00
   2.0256476e+01  -2.7169685e+01   4.0000000e+02  -7.7111418e-01  -1.7229058e+00  -1.4726216e+00
   2.0363436e+01  -2.7255686e+01   4.0000000e+02  -9.2464788e-01  -1.6486113e+00  -1.5322223e+00
   2.0474643e+01  -2.7337406e+01   4.0000000e+02  -1.0735196e+00  -1.5658519e+00  -1.5820688e+00
   2.0589885e+01  -2.7414681e+01   4.0000000e+02  -1.2168269e+00  -1.4749327e+00  -1.6218904e+00
   2.0708943e+01  -2.7487358e+01   4.0000000e+02  -1.3536578e+00  -1.3762345e+00  -1.6513113e+00
   2.0831584e+01  -2.7555290e+01   4.0000000e+02  -1.4831311e+00  -1.2702017e+00  -1.6698540e+00
   2.0957571e+01  -2.7618341e+01   4.0000000e+02  -1.6044518e+00  -1.1573225e+00  -1.6769612e+00
   2.1086657e+01  -2.7676384e+01   4.0000000e+02  -1.7169457e+00  -1.0381297e+00  -1.6720260e+00
   2.1218587e+01  -2.7729303e+01   4.0000000e+02  -1.8200912e+00  -9.1320574e-01  -1.6544361e+00
   2.1353099e+01  -2.7776990e+01   4.0000000e+02  -1.9135363e+00  -7.8319923e-01  -1.6236336e+00
   2.1489926e+01  -2.7819350e+01   4.0000000e+02  -1.9971134e+00  -6.4884497e-01  -1.5791690e+00
   2.1628795e+01  -2.7856296e+01   4.0000000e+02  -2.0708352e+00  -5.1099330e-01  -1.5207699e+00
   2.1769425e+01  -2.7887753e+01   4.0000000e+02  -2.1348914e+00  -3.7063515e-01  -1.4483949e+00
   2.1911535e+01  -2.7913657e+01   4.0000000e+02  -2.1896381e+00  -2.2891251e-01  -1.3622852e+00
   2.2054838e+01  -2.7933957e+01   4.0000000e+02  -2.2355815e+00  -8.7127718e-02  -1.2630005e+00
   2.2199043e+01  -2.7948610e+01   4.0000000e+02  -2.2733566e+00   5.3269103e-02  -1.1514507e+00
   2.2343859e+01  -2.7957588e+01   4.0000000e+02  -2.3037098e+00   1.9071695e-01  -1.0288877e+00
   2.2488992e+01  -2.7960870e+01   4.0000000e+02  -2.3274710e+00   3.2358865e-01  -8.9690523e-01
   2.2634147e+01  -2.7958452e+01   4.0000000e+02  -2.3455313e+00   4.5025947e-01  -7.5738696e-01
   2.2779029e+01  -2.7950337e+01   4.0000000e+02  -2.3588120e+00   5.6918045e-01  -6.1247011e-01
   2.2923346e+01  -2.7936543e+01   4.0000000e+02  -2.3682394e+00   6.7895863e-01  -4.6446130e-01
   2.3066804e+01  -2.7917097e+01   4.0000000e+02  -2.3747140e+00   7.7842311e-01  -3.1577535e-01
   2.3209114e+01  -2.7892039e+01   4.0000000e+02  -2.3790857e+00   8.6668884e-01  -1.6883927e-01
   2.3349987e+01  -2.7861420e+01   4.0000000e+02  -2.3821295e+00   9.4319171e-01  -2.6023296e-02
   2.3489141e+01  -2.7825302e+01   4.0000000e+02  -2.3845267e+00   1.0077093e+00   1.1043907e-01
   2.3626295e+01  -2.7783759e+01   4.0000000e+02  -2.3868507e+00   1.0603508e+00   2.3850187e-01
   2.3761176e+01  -2.7736873e+01   4.0000000e+02  -2.3895592e+00   1.1015318e+00   3.5635106e-01
   2.3893514e+01  -2.7684741e+01   4.0000000e+02  -2.3929924e+00   1.1319266e+00   4.6243378e-01
   2.4023048e+01  -2.7627467e+01   4.0000000e+02  -2.3973765e+00   1.1524122e+00   5.5546145e-01
   2.4149521e+01  -2.7565168e+01   4.0000000e+02  -2.4028325e+00   1.1640030e+00   6.3440763e-01
   2.4272685e+01  -2.7497967e+01   4.0000000e+02  -2.4093877e+00   1.1677864e+00   6.9848816e-01
   2.4392301e+01  -2.7426001e+01   4.0000000e+02  -2.4169896e+00   1.1648619e+00   7.4715403e-01
   2.4508136e+01  -2.7349414e+01   4.0000000e+02  -2.4255207e+00   1.1562878e+00   7.8005139e-01
   2.4619969e+01  -2.7268357e+01   4.0000000e+02  -2.4348118e+00   1.1430380e+00   7.9700743e-01
   2.4727586e+01  -2.7182994e+01   4.0000000e+02  -2.4446523e+00   1.1259709e+00   7.9801330e-01
   2.4830783e+01  -2.7093494e+01   4.0000000e+02  -2.4547987e+00   1.1058087e+00   7.8319772e-01
   2.4929369e+01  -2.7000034e+01   4.0000000e+02  -2.4649783e+00   1.0831278e+00   7.5282303e-01
   2.5023159e+01  -2.6902800e+01   4.0000000e+02  -2.4748884e+00   1.0583604e+00   7.0726771e-01
   2.5111984e+01  -2.6801982e+01   4.0000000e+02  -2.4841935e+00   1.0318010e+00   6.4702389e-01
   2.5195681e+01  -2.6697780e+01   4.0000000e+02  -2.4925189e+00   1.0036228e+00   5.7268923e-01
   2.5274103e+01  -2.6590398e+01   4.0000000e+02  -2.4994455e+00   9.7389357e-01   4.8496487e-01
   2.5347112e+01  -2.6480045e+01   4.0000000e+02  -2.5045046e+00   9.4259645e-01   3.8464372e-01
   2.5414581e+01  -2.6366936e+01   4.0000000e+02  -2.5071766e+00   9.0964844e-01   2.7260920e-01
   2.5476398e+01  -2.6251292e+01   4.0000000e+02  -2.5068954e+00   8.7491544e-01   1.4983226e-01
   2.5532459e+01  -2.6133336e+01   4.0000000e+02  -2.5030568e+00   8.3822562e-01   1.7346216e-02
   2.5582675e+01  -2.6013296e+01   4.0000000e+02  -2.4950346e+00   7.9937535e-01  -1.2375324e-01
   2.5626968e+01  -2.5891402e+01   4.0000000e+02  -2.4821991e+00   7.5813235e-01  -2.7233360e-01
   2.5665272e+01  -2.5767889e+01   4.0000000e+02  -2.4639416e+00   7.1423507e-01  -4.2723721e-01
   2.5697533e+01  -2.5642992e+01   4.0000000e+02  -2.4396962e+00   6.6738777e-01  -5.8730726e-01
   2.5723708e+01  -2.5516949e+01   4.0000000e+02  -2.4089637e+00   6.1725722e-01  -7.5139972e-01
   2.5743768e+01  -2.5390000e+01   4.0000000e+02  -2.3713316e+00   5.6346922e-01  -9.1839307e-01
   2.5757695e+01  -2.5262384e+01   4.0000000e+02  -2.3264875e+00   5.0560840e-01  -1.0872002e+00
   2.5765480e+01  -2.5134343e+01   4.0000000e+02  -2.2742296e+00   4.4322512e-01  -1.2567603e+00
   2.5767130e+01  -2.5006116e+01   4.0000000e+02  -2.2144731e+00   3.7584306e-01  -1.4260266e+00
   2.5762661e+01  -2.4877945e+01   4.0000000e+02  -2.1472503e+00   3.0297954e-01  -1.5939439e+00
   2.5752099e+01  -2.4750069e+01   4.0000000e+02  -2.0727071e+00   2.2416411e-01  -1.7594274e+00
   2.5735483e+01  -2.4622726e+01   4.0000000e+02  -1.9911012e+00   1.3896532e-01  -1.9213271e+00
   2.5712863e+01  -2.4496152e+01   4.0000000e+02  -1.9027967e+00   4.7017860e-02  -2.0784035e+00
   2.5684298e+01  -2.4370582e+01   4.0000000e+02  -1.8082587e+00  -5.1950163e-02  -2.2293074e+00
   2.5649858e+01  -2.4246248e+01   4.0000000e+02  -1.7080481e+00  -1.5809459e-01  -2.3725717e+00
   2.5609623e+01  -2.4123378e+01   4.0000000e+02  -1.6028145e+00  -2.7143794e-01  -2.5066191e+00
   2.5563683e+01  -2.4002198e+01   4.0000000e+02  -1.4932906e+00  -3.9185674e-01  -2.6297829e+00
   2.5512139e+01  -2.3882929e+01   4.0000000e+02  -1.3802809e+00  -5.1908049e-01  -2.7403481e+00
   2.5455099e+01  -2.3765790e+01   4.0000000e+02  -1.2646491e+00  -6.5269608e-01  -2.8366029e+00
   2.5392680e+01  -2.3650995e+01   4.0000000e+02  -1.1473032e+00  -7.9216227e-01  -2.9169017e+00
   2.5325011e+01  -2.3538751e+01   4.0000000e+02  -1.0291814e+00  -9.3682795e-01  -2.9797303e+00
   2.5252227e+01  -2.3429262e+01   4.0000000e+02  -9.1123399e-01  -1.0859535e+00  -3.0237704e+00
   2.5174470e+01  -2.3322726e+01   4.0000000e+02  -7.9440652e-01  -1.2387363e+00  -3.0479582e+00
   2.5091893e+01  -2.3219335e+01   4.0000000e+02  -6.7962981e-01  -1.3943309e+00  -3.0515303e+00
   2.5004655e+01  -2.3119276e+01   4.0000000e+02  -5.6780333e-01  -1.5518722e+00  -3.0340573e+00
   2.4912921e+01  -2.3022729e+01   4.0000000e+02  -4.5978270e-01  -1.7104957e+00  -2.9954588e+00
   2.4816865e+01  -2.2929866e+01   4.0000000e+02  -3.5637043e-01  -1.8693516e+00  -2.9360013e+00
   2.4716668e+01  -2.2840855e+01   4.0000000e+02  -2.5830240e-01  -2.0276151e+00  -2.8562797e+00
   2.4612515e+01  -2.2755854e+01   4.0000000e+02  -1.6622913e-01  -2.1845044e+00  -2.7571773e+00
   2.4504600e+01  -2.2675015e+01   4.0000000e+02  -8.0703721e-02  -2.3392802e+00  -2.6398195e+00
   2.4393119e+01  -2.2598482e+01   4.0000000e+02  -2.1574158e-03  -2.4912585e+00  -2.5055070e+00
   2.4278276e+01  -2.2526391e+01   4.0000000e+02   6.9115231e-02  -2.6398060e+00  -2.3556530e+00
   2.4160281e+01  -2.2458871e+01   4.0000000e+02   1.3297620e-01  -2.7843386e+00  -2.1917138e+00
   2.4039345e+01  -2.2396042e+01   4.0000000e+02   1.8946155e-01  -2.9243187e+00  -2.0151185e+00
   2.3915687e+01  -2.2338014e+01   4.0000000e+02   2.3878609e-01  -3.0592360e+00  -1.8272206e+00
   2.3789528e+01  -2.2284891e+01   4.0000000e+02   2.8134992e-01  -3.1885915e+00  -1.6292530e+00
   2.3661093e+01  -2.2236767e+01   4.0000000e+02   3.1773111e-01  -3.3118746e+00  -1.4223038e+00
   2.3530612e+01  -2.2193726e+01   4.0000000e+02   3.4867177e-01  -3.4285365e+00  -1.2073122e+00
   2.3398314e+01  -2.2155846e+01   4.0000000e+02   3.7506184e-01  -3.5379684e+00  -9.8507496e-01
   2.3264435e+01  -2.2123192e+01   4.0000000e+02   3.9790713e-01  -3.6394765e+00  -7.5628064e-01
   2.3129212e+01  -2.2095823e+01   4.0000000e+02   4.1830551e-01  -3.7322707e+00  -5.2154571e-01
   2.2992881e+01  -2.2073786e+01   4.0000000e+02   4.3741235e-01  -3.8154645e+00  -2.8145307e-01
   2.2855685e+01  -2.2057121e+01   4.0000000e+02   4.5640986e-01  -3.8880804e+00  -3.6616966e-02
   2.2717864e+01  -2.2045857e+01   4.0000000e+02   4.7647594e-01  -3.9490824e+00   2.1229024e-01
   2.2579660e+01  -2.2040014e+01   4.0000000e+02   4.9875460e-01  -3.9974146e+00   4.6448929e-01
   2.2441316e+01  -2.2039602e+01   4.0000000e+02   5.2432743e-01  -4.0320578e+00   7.1906587e-01
   2.2303075e+01  -2.2044622e+01   4.0000000e+02   5.5418798e-01  -4.0520951e+00   9.7495158e-01
   2.2165180e+01  -2.2055065e+01   4.0000000e+02   5.8921523e-01  -4.0567847e+00   1.2309146e+00
   2.2027873e+01  -2.2070913e+01   4.0000000e+02   6.3015024e-01  -4.0456311e+00   1.4855602e+00
   2.1891396e+01  -2.2092137e+01   4.0000000e+02   6.7757043e-01  -4.0184495e+00   1.7373367e+00
   2.1755989e+01  -2.2118700e+01   4.0000000e+02   7.3187202e-01  -3.9754160e+00   1.9845500e+00
   2.1621891e+01  -2.2150556e+01   4.0000000e+02   7.9325093e-01  -3.9170978e+00   2.2253788e+00
   2.1489339e+01  -2.2187648e+01   4.0000000e+02   8.6168759e-01  -3.8444594e+00   2.4578961e+00
   2.1358566e+01  -2.2229911e+01   4.0000000e+02   9.3694486e-01  -3.7588397e+00   2.6800932e+00
   2.1229806e+01  -2.2277270e+01   4.0000000e+02   1.0185675e+00  -3.6619090e+00   2.8898946e+00
   2.1103288e+01  -2.2329641e+01   4.0000000e+02   1.1058969e+00  -3.5555962e+00   3.0851968e+00
   2.0979236e+01  -2.2386931e+01   4.0000000e+02   1.1980941e+00  -3.4420022e+00   3.2639006e+00
   2.0857874e+01  -2.2449039e+01   4.0000000e+02   1.2941731e+00  -3.3233091e+00   3.4239413e+00
   2.0739418e+01  -2.2515856e+01   4.0000000e+02   1.3930426e+00  -3.2016786e+00   3.5633520e+00
   2.0624084e+01  -2.2587261e+01   4.0000000e+02   1.4935453e+00  -3.0791719e+00   3.6803105e+00
   2.0512081e+01  -2.2663129e+01   4.0000000e+02   1.5945154e+00  -2.9576698e+00   3.7732102e+00
   2.0403611e+01  -2.2743324e+01   4.0000000e+02   1.6948123e+00  -2.8388207e+00   3.8407364e+00
   2.0298876e+01  -2.2827704e+01   4.0000000e+02   1.7933615e+00  -2.7240180e+00   3.8819218e+00
   2.0198066e+01  -2.2916117e+01   4.0000000e+02   1.8891727e+00  -2.6143805e+00   3.8962349e+00
   2.0101371e+01  -2.3008406e+01   4.0000000e+02   1.9813539e+00  -2.5107789e+00   3.8836091e+00
   2.0008971e+01  -2.3104406e+01   4.0000000e+02   2.0691006e+00  -2.4138539e+00   3.8444951e+00
   1.9921040e+01  -2.3203944e+01   4.0000000e+02   2.1516747e+00  -2.3240604e+00   3.7798647e+00
   1.9837745e+01  -2.3306841e+01   4.0000000e+02   2.2283743e+00  -2.2417093e+00   3.6911900e+00
   1.9759248e+01  -2.3412912e+01   4.0000000e+02   2.2984953e+00  -2.1670109e+00   3.5803915e+00
   1.9685700e+01  -2.3521966e+01   4.0000000e+02   2.3612919e+00  -2.1001012e+00   3.4497680e+00
   1.9617246e+01  -2.3633805e+01   4.0000000e+02   2.4159450e+00  -2.0410694e+00   3.3018921e+00
   1.9554023e+01  -2.3748227e+01   4.0000000e+02   2.4615444e+00  -1.9899656e+00   3.1394899e+00
   1.9496160e+01  -2.3865024e+01   4.0000000e+02   2.4970858e+00  -1.9467977e+00   2.9653220e+00
   1.9443775e+01  -2.3983984e+01   4.0000000e+02   2.5214901e+00  -1.9115149e+00   2.7820623e+00
   1.9396979e+01  -2.4104888e+01   4.0000000e+02   2.5336422e+00  -1.8839930e+00   2.5921942e+00
   1.9355873e+01  -2.4227516e+01   4.0000000e+02   2.5324496e+00  -1.8640111e+00   2.3979177e+00
   1.9320549e+01  -2.4351643e+01   4.0000000e+02   2.5169134e+00  -1.8512333e+00   2.2011015e+00
   1.9291088e+01  -2.4477041e+01   4.0000000e+02   2.4862058e+00  -1.8451958e+00   2.0032585e+00
   1.9267562e+01  -2.4603478e+01   4.0000000e+02   2.4397477e+00  -1.8453063e+00   1.8055540e+00
   1.9250032e+01  -2.4730719e+01   4.0000000e+02   2.3772750e+00  -1.8508507e+00   1.6088429e+00
   1.9238550e+01  -2.4858530e+01   4.0000000e+02   2.2988854e+00  -1.8610135e+00   1.4137200e+00
   1.9233154e+01  -2.4986671e+01   4.0000000e+02   2.2050644e+00  -1.8748976e+00   1.2206105e+00
   1.9233875e+01  -2.5114905e+01   4.0000000e+02   2.0966766e+00  -1.8915622e+00   1.0298231e+00
   1.9240730e+01  -2.5242990e+01   4.0000000e+02   1.9749351e+00  -1.9100458e+00   8.4164492e-01
   1.9253725e+01  -2.5370685e+01   4.0000000e+02   1.8413361e+00  -1.9293969e+00   6.5638789e-01
   1.9272856e+01  -2.5497751e+01   4.0000000e+02   1.6975735e+00  -1.9486952e+00   4.7443024e-01
   1.9298106e+01  -2.5623947e+01   4.0000000e+02   1.5454454e+00  -1.9670624e+00   2.9624853e-01
   1.9329446e+01  -2.5749033e+01   4.0000000e+02   1.3867513e+00  -1.9836668e+00   1.2241476e-01
   1.9366837e+01  -2.5872771e+01   4.0000000e+02   1.2231951e+00  -1.9977221e+00  -4.6423045e-02
   1.9410225e+01  -2.5994925e+01   4.0000000e+02   1.0563082e+00  -2.0084763e+00  -2.0956206e-01
   1.9459548e+01  -2.6115262e+01   4.0000000e+02   8.8739176e-01  -2.0152059e+00  -3.6629282e-01
   1.9514729e+01  -2.6233549e+01   4.0000000e+02   7.1749571e-01  -2.0172055e+00  -5.1592607e-01
   1.9575679e+01  -2.6349558e+01   4.0000000e+02   5.4741464e-01  -2.0137858e+00  -6.5783682e-01
   1.9642298e+01  -2.6463065e+01   4.0000000e+02   3.7771907e-01  -2.0042787e+00  -7.9149262e-01
   1.9948419e+01  -2.7071110e+01   4.0000000e+02  -5.0979752e-01  -1.8076970e+00  -1.1514191e+00
   2.0046386e+01  -2.7165472e+01   4.0000000e+02  -6.6608899e-01  -1.7568282e+00  -1.2256781e+00
   2.0148837e+01  -2.7256058e+01   4.0000000e+02  -8.1962147e-01  -1.6975942e+00  -1.2913158e+00
   2.0255598e+01  -2.7342702e+01   4.0000000e+02  -9.6966594e-01  -1.6300820e+00  -1.3483091e+00
   2.0366482e+01  -2.7425244e+01   4.0000000e+02  -1.1153854e+00  -1.5544860e+00  -1.3965492e+00
   2.0481296e+01  -2.7503533e+01   4.0000000e+02  -1.2558809e+00  -1.4710856e+00  -1.4358253e+00
   2.0599836e+01  -2.7577424e+01   4.0000000e+02  -1.3902329e+00  -1.3802266e+00  -1.4658095e+00
   2.0721891e+01  -2.7646780e+01   4.0000000e+02  -1.5175530e+00  -1.2822985e+00  -1.4860598e+00
   2.0847241e+01  -2.7711473e+01   4.0000000e+02  -1.6370290e+00  -1.1777201e+00  -1.4960293e+00
   2.0975661e+01  -2.7771382e+01   4.0000000e+02  -1.7479624e+00  -1.0669317e+00  -1.4950972e+00
   2.1106917e+01  -2.7826395e+01   4.0000000e+02  -1.8497967e+00  -9.5040049e-01  -1.4826023e+00
   2.1240769e+01  -2.7876411e+01   4.0000000e+02  -1.9421387e+00  -8.2863265e-01  -1.4578899e+00
   2.1376971e+01  -2.7921334e+01   4.0000000e+02  -2.0247633e+00  -7.0219938e-01  -1.4203762e+00
   2.1515271e+01  -2.7961082e+01   4.0000000e+02  -2.0976212e+00  -5.7176225e-01  -1.3695946e+00
   2.1655413e+01  -2.7995579e+01   4.0000000e+02  -2.1608293e+00  -4.3810538e-01  -1.3052672e+00
   2.1797138e+01  -2.8024762e+01   4.0000000e+02  -2.2146657e+00  -3.0215818e-01  -1.2273482e+00
   2.1940180e+01  -2.8048574e+01   4.0000000e+02  -2.2595522e+00  -1.6501821e-01  -1.1360820e+00
   2.2084271e+01  -2.8066971e+01   4.0000000e+02  -2.2960447e+00  -2.7947230e-02  -1.0320274e+00
   2.2229144e+01  -2.8079920e+01   4.0000000e+02  -2.3248150e+00   1.0764563e-01  -9.1607732e-01
   2.2374524e+01  -2.8087394e+01   4.0000000e+02  -2.3466294e+00   2.4022869e-01  -7.8947554e-01
   2.2520141e+01  -2.8089380e+01   4.0000000e+02  -2.3623321e+00   3.6821295e-01  -6.5377994e-01
   2.2665719e+01  -2.8085875e+01   4.0000000e+02  -2.3728198e+00   4.9000731e-01  -5.1084322e-01
   2.2810986e+01  -2.8076885e+01   4.0000000e+02  -2.3790171e+00   6.0410197e-01  -3.6275506e-01
   2.2955670e+01  -2.8062427e+01   4.0000000e+02  -2.3818507e+00   7.0914081e-01  -2.1177701e-01
   2.3099498e+01  -2.8042528e+01   4.0000000e+02  -2.3822225e+00   8.0399029e-01  -6.0271459e-02
   2.3242202e+01  -2.8017226e+01   4.0000000e+02  -2.3809843e+00   8.8779968e-01   8.9386045e-02
   2.3383515e+01  -2.7986567e+01   4.0000000e+02  -2.3789148e+00   9.6003540e-01   2.3487353e-01
   2.3523174e+01  -2.7950611e+01   4.0000000e+02  -2.3767003e+00   1.0204980e+00   3.7400557e-01
   2.3660920e+01  -2.7909424e+01   4.0000000e+02  -2.3749213e+00   1.0693148e+00   5.0477657e-01
   2.3796496e+01  -2.7863083e+01   4.0000000e+02  -2.3740438e+00   1.1069121e+00   6.2540757e-01
   2.3929654e+01  -2.7811676e+01   4.0000000e+02  -2.3744169e+00   1.1339724e+00   7.3438134e-01
   2.4060150e+01  -2.7755298e+01   4.0000000e+02  -2.3762766e+00   1.1513772e+00   8.3043742e-01
   2.4187744e+01  -2.7694055e+01   4.0000000e+02  -2.3797536e+00   1.1601458e+00   9.1257449e-01
   2.4312205e+01  -2.7628060e+01   4.0000000e+02  -2.3848852e+00   1.1613729e+00   9.8003643e-01
   2.4433310e+01  -2.7557436e+01   4.0000000e+02  -2.3916284e+00   1.1561694e+00   1.0322947e+00
   2.4550840e+01  -2.7482315e+01   4.0000000e+02  -2.3998753e+00   1.1456113e+00   1.0690170e+00
   2.4664587e+01  -2.7402835e+01   4.0000000e+02  -2.4094673e+00   1.1306964e+00   1.0900479e+00
   2.4774350e+01  -2.7319142e+01   4.0000000e+02  -2.4202066e+00   1.1123131e+00   1.0953841e+00
   2.4879937e+01  -2.7231392e+01   4.0000000e+02  -2.4318645e+00   1.0912186e+00   1.0851614e+00
   2.4981165e+01  -2.7139745e+01   4.0000000e+02  -2.4441879e+00   1.0680283e+00   1.0596289e+00
   2.5077861e+01  -2.7044369e+01   4.0000000e+02  -2.4568987e+00   1.0432135e+00   1.0191438e+00
   2.5169861e+01  -2.6945437e+01   4.0000000e+02  -2.4696921e+00   1.0171074e+00   9.6415602e-01
   2.5257010e+01  -2.6843131e+01   4.0000000e+02  -2.4822294e+00   9.8991800e-01   8.9520754e-01
   2.5339165e+01  -2.6737636e+01   4.0000000e+02  -2.4941316e+00   9.6174361e-01   8.1292052e-01
   2.5416191e+01  -2.6629143e+01   4.0000000e+02  -2.5049722e+00   9.3259305e-01   7.1799352e-01
   2.5487966e+01  -2.6517847e+01   4.0000000e+02  -2.5142717e+00   9.0240347e-01   6.1120034e-01
   2.5554375e+01  -2.6403948e+01   4.0000000e+02  -2.5214976e+00   8.7106032e-01   4.9338108e-01
   2.5615318e+01  -2.6287652e+01   4.0000000e+02  -2.5260688e+00   8.3840955e-01   3.6544762e-01
   2.5670702e+01  -2.6169165e+01   4.0000000e+02  -2.5273663e+00   8.0427025e-01   2.2835756e-01
   2.5720446e+01  -2.6048698e+01   4.0000000e+02  -2.5247497e+00   7.6843892e-01   8.3118375e-02
   2.5764481e+01  -2.5926466e+01   4.0000000e+02  -2.5175784e+00   7.3069050e-01  -6.9227066e-02
   2.5802745e+01  -2.5802684e+01   4.0000000e+02  -2.5052338e+00   6.9077612e-01  -2.2762701e-01
   2.5835191e+01  -2.5677571e+01   4.0000000e+02  -2.4871445e+00   6.4841598e-01  -3.9102160e-01
   2.5861780e+01  -2.5551347e+01   4.0000000e+02  -2.4628069e+00   6.0329452e-01  -5.5836956e-01
   2.5882485e+01  -2.5424232e+01   4.0000000e+02  -2.4318034e+00   5.5505387e-01  -7.2865666e-01
   2.5897288e+01  -2.5296449e+01   4.0000000e+02  -2.3938148e+00   5.0329340e-01  -9.0089953e-01
   2.5906183e+01  -2.5168220e+01   4.0000000e+02  -2.3486281e+00   4.4757030e-01  -1.0741464e+00
   2.5909172e+01  -2.5039767e+01   4.0000000e+02  -2.2961367e+00   3.8740835e-01  -1.2474686e+00
   2.5906269e+01  -2.4911313e+01   4.0000000e+02  -2.2363409e+00   3.2231174e-01  -1.4199359e+00
   2.5897498e+01  -2.4783078e+01   4.0000000e+02  -2.1693405e+00   2.5178276e-01  -1.5905979e+00
   2.5882891e+01  -2.4655284e+01   4.0000000e+02  -2.0953305e+00   1.7534811e-01  -1.7584490e+00
   2.5862492e+01  -2.4528148e+01   4.0000000e+02  -2.0145947e+00   9.2581521e-02  -1.9224042e+00
   2.5836353e+01  -2.4401889e+01   4.0000000e+02  -1.9275027e+00   3.1349186e-03  -2.0812691e+00
   2.5804534e+01  -2.4276721e+01   4.0000000e+02  -1.8345034e+00  -9.3241072e-02  -2.2337320e+00
   2.5767107e+01  -2.4152857e+01   4.0000000e+02  -1.7361278e+00  -1.9667267e-01  -2.3783536e+00
   2.5724151e+01  -2.4030507e+01   4.0000000e+02  -1.6329822e+00  -3.0715018e-01  -2.5135854e+00
   2.5675754e+01  -2.3909876e+01   4.0000000e+02  -1.5257456e+00  -4.2452197e-01  -2.6377981e+00
   2.5622011e+01  -2.3791169e+01   4.0000000e+02  -1.4151643e+00  -5.4849166e-01  -2.7493209e+00
   2.5563027e+01  -2.3674584e+01   4.0000000e+02  -1.3020429e+00  -6.7863085e-01  -2.8464990e+00
   2.5498915e+01  -2.3560318e+01   4.0000000e+02  -1.1872347e+00  -8.1438926e-01  -2.9277513e+00
   2.5429794e+01  -2.3448561e+01   4.0000000e+02  -1.0716244e+00  -9.5512033e-01  -2.9916374e+00
   2.5355792e+01  -2.3339499e+01   4.0000000e+02  -9.5611905e-01  -1.1000988e+00  -3.0369143e+00
   2.5277042e+01  -2.3233315e+01   4.0000000e+02  -8.4163134e-01  -1.2485448e+00  -3.0625899e+00
   2.5193686e+01  -2.3130184e+01   4.0000000e+02  -7.2906873e-01  -1.3996469e+00  -3.0679655e+00
   2.5105873e+01  -2.3030278e+01   4.0000000e+02  -6.1932203e-01  -1.5525784e+00  -3.0526638e+00
   2.5013755e+01  -2.2933761e+01   4.0000000e+02  -5.1324878e-01  -1.7065213e+00  -3.0166413e+00
   2.4917495e+01  -2.2840793e+01   4.0000000e+02  -4.1166916e-01  -1.8606712e+00  -2.9601869e+00
   2.4817258e+01  -2.2751528e+01   4.0000000e+02  -3.1534424e-01  -2.0142573e+00  -2.8839011e+00
   2.4713215e+01  -2.2666113e+01   4.0000000e+02  -2.2496313e-01  -2.1665506e+00  -2.7886624e+00
   2.4605544e+01  -2.2584686e+01   4.0000000e+02  -1.4112518e-01  -2.3168715e+00  -2.6755795e+00
   2.4494428e+01  -2.2507383e+01   4.0000000e+02  -6.4319171e-02  -2.4645920e+00  -2.5459363e+00
   2.4380052e+01  -2.2434330e+01   4.0000000e+02   5.1004058e-03  -2.6091464e+00  -2.4011212e+00
   2.4262609e+01  -2.2365647e+01   4.0000000e+02   6.6928520e-02  -2.7500222e+00  -2.2425671e+00
   2.4142293e+01  -2.2301445e+01   4.0000000e+02   1.2112984e-01  -2.8867609e+00  -2.0716795e+00
   2.4019305e+01  -2.2241829e+01   4.0000000e+02   1.6784622e-01  -3.0189394e+00  -1.8897877e+00
   2.3893846e+01  -2.2186898e+01   4.0000000e+02   2.0740465e-01  -3.1461576e+00  -1.6980930e+00
   2.3766125e+01  -2.2136739e+01   4.0000000e+02   2.4030813e-01  -3.2680115e+00  -1.4976452e+00
   2.3636349e+01  -2.2091435e+01   4.0000000e+02   2.6723029e-01  -3.3840706e+00  -1.2893246e+00
   2.3504731e+01  -2.2051060e+01   4.0000000e+02   2.8899243e-01  -3.4938455e+00  -1.0738551e+00
   2.3371486e+01  -2.2015679e+01   4.0000000e+02   3.0654086e-01  -3.5967649e+00  -8.5182300e-01
   2.3236830e+01  -2.1985350e+01   4.0000000e+02   3.2092036e-01  -3.6921551e+00  -6.2371279e-01
   2.3100982e+01  -2.1960121e+01   4.0000000e+02   3.3324265e-01  -3.7792276e+00  -3.8995464e-01
   2.2964163e+01  -2.1940034e+01   4.0000000e+02   3.4465992e-01  -3.8570799e+00  -1.5097558e-01
   2.2826593e+01  -2.1925122e+01   4.0000000e+02   3.5633562e-01  -3.9247121e+00   9.2757636e-02
   2.2688496e+01  -2.1915408e+01   4.0000000e+02   3.6941646e-01  -3.9810551e+00   3.4068559e-01
   2.2550094e+01  -2.1910909e+01   4.0000000e+02   3.8501274e-01  -4.0250174e+00   5.9212735e-01
   2.2411611e+01  -2.1911631e+01   4.0000000e+02   4.0417126e-01  -4.0555423e+00   8.4624963e-01
   2.2273271e+01  -2.1917574e+01   4.0000000e+02   4.2785904e-01  -4.0716750e+00   1.1020519e+00
   2.2135297e+01  -2.1928727e+01   4.0000000e+02   4.5693798e-01  -4.0726362e+00   1.3583660e+00
   2.1997912e+01  -2.1945073e+01   4.0000000e+02   4.9214916e-01  -4.0578910e+00   1.6138556e+00
   2.1861340e+01  -2.1966586e+01   4.0000000e+02   5.3408927e-01  -4.0272135e+00   1.8670280e+00
   2.1725799e+01  -2.1993229e+01   4.0000000e+02   5.8318886e-01  -3.9807341e+00   2.1162648e+00
   2.1591512e+01  -2.2024961e+01   4.0000000e+02   6.3970114e-01  -3.9189709e+00   2.3598171e+00
   2.1458695e+01  -2.2061730e+01   4.0000000e+02   7.0368039e-01  -3.8428324e+00   2.5958535e+00
   2.1327566e+01  -2.2103475e+01   4.0000000e+02   7.7497339e-01  -3.7536017e+00   2.8224628e+00
   2.1198337e+01  -2.2150129e+01   4.0000000e+02   8.5322199e-01  -3.6528873e+00   3.0376899e+00
   2.1071220e+01  -2.2201616e+01   4.0000000e+02   9.3786477e-01  -3.5425612e+00   3.2395485e+00
   2.0946424e+01  -2.2257853e+01   4.0000000e+02   1.0281560e+00  -3.4246754e+00   3.4260514e+00
   2.0824155e+01  -2.2318747e+01   4.0000000e+02   1.1231874e+00  -3.3013712e+00   3.5952425e+00
   2.0704614e+01  -2.2384199e+01   4.0000000e+02   1.2219277e+00  -3.1747844e+00   3.7452346e+00
   2.0588000e+01  -2.2454103e+01   4.0000000e+02   1.3232623e+00  -3.0469637e+00   3.8742488e+00
   2.0474506e+01  -2.2528343e+01   4.0000000e+02   1.4260337e+00  -2.9197935e+00   3.9806774e+00
   2.0364324e+01  -2.2606800e+01   4.0000000e+02   1.5290941e+00  -2.7949464e+00   4.0631280e+00
   2.0257639e+01  -2.2689343e+01   4.0000000e+02   1.6313334e+00  -2.6738432e+00   4.1205055e+00
   2.0154632e+01  -2.2775838e+01   4.0000000e+02   1.7317203e+00  -2.5576461e+00   4.1520603e+00
   2.0055477e+01  -2.2866142e+01   4.0000000e+02   1.8293136e+00  -2.4472637e+00   4.1574551e+00
   1.9960346e+01  -2.2960106e+01   4.0000000e+02   1.9232701e+00  -2.3433828e+00   4.1367978e+00
   1.9869404e+01  -2.3057577e+01   4.0000000e+02   2.0128363e+00  -2.2464998e+00   4.0906707e+00
   1.9782808e+01  -2.3158392e+01   4.0000000e+02   2.0973194e+00  -2.1569609e+00   4.0201424e+00
   1.9700711e+01  -2.3262384e+01   4.0000000e+02   2.1760608e+00  -2.0750101e+00   3.9267304e+00
   1.9623261e+01  -2.3369382e+01   4.0000000e+02   2.2483989e+00  -2.0008248e+00   3.8123522e+00
   1.9550595e+01  -2.3479208e+01   4.0000000e+02   2.3136284e+00  -1.9345350e+00   3.6792623e+00
   1.9482847e+01  -2.3591678e+01   4.0000000e+02   2.3709725e+00  -1.8762479e+00   3.5299486e+00
   1.9420141e+01  -2.3706605e+01   4.0000000e+02   2.4195660e+00  -1.8260425e+00   3.3670260e+00
   1.9362596e+01  -2.3823796e+01   4.0000000e+02   2.4584517e+00  -1.7839649e+00   3.1931257e+00
   1.9310322e+01  -2.3943055e+01   4.0000000e+02   2.4865982e+00  -1.7500066e+00   3.0107845e+00
   1.9263420e+01  -2.4064182e+01   4.0000000e+02   2.5029346e+00  -1.7240802e+00   2.8223520e+00
   1.9221985e+01  -2.4186972e+01   4.0000000e+02   2.5064035e+00  -1.7059994e+00   2.6299135e+00
   1.9186102e+01  -2.4311218e+01   4.0000000e+02   2.4960263e+00  -1.6954548e+00   2.4352396e+00
   1.9155847e+01  -2.4436709e+01   4.0000000e+02   2.4709754e+00  -1.6920026e+00   2.2397676e+00
   1.9131290e+01  -2.4563232e+01   4.0000000e+02   2.4306466e+00  -1.6950660e+00   2.0446016e+00
   1.9112488e+01  -2.4690571e+01   4.0000000e+02   2.3747223e+00  -1.7039359e+00   1.8505558e+00
   1.9099491e+01  -2.4818509e+01   4.0000000e+02   2.3032209e+00  -1.7177973e+00   1.6581964e+00
   1.9092340e+01  -2.4946827e+01   4.0000000e+02   2.2165242e+00  -1.7357537e+00   1.4679120e+00
   1.9091065e+01  -2.5075303e+01   4.0000000e+02   2.1153804e+00  -1.7568572e+00   1.2799879e+00
   1.9095686e+01  -2.5203716e+01   4.0000000e+02   2.0008769e+00  -1.7801434e+00   1.0946668e+00
   1.9106215e+01  -2.5331844e+01   4.0000000e+02   1.8743908e+00  -1.8046630e+00   9.1220679e-01
   1.9122651e+01  -2.5459465e+01   4.0000000e+02   1.7375146e+00  -1.8295012e+00   7.3292995e-01
   1.9144986e+01  -2.5586355e+01   4.0000000e+02   1.5919713e+00  -1.8537991e+00   5.5724142e-01
   1.9173198e+01  -2.5712294e+01   4.0000000e+02   1.4395118e+00  -1.8767541e+00   3.8563849e-01
   1.9207258e+01  -2.5837061e+01   4.0000000e+02   1.2818282e+00  -1.8976234e+00   2.1869661e-01
   1.9247123e+01  -2.5960436e+01   4.0000000e+02   1.1204692e+00  -1.9157095e+00   5.7052789e-02
   1.9292743e+01  -2.6082202e+01   4.0000000e+02   9.5677447e-01  -1.9303529e+00  -9.8638908e-02
   1.9344055e+01  -2.6202142e+01   4.0000000e+02   7.9184074e-01  -1.9409151e+00  -2.4773310e-01
   1.9400984e+01  -2.6320044e+01   4.0000000e+02   6.2650429e-01  -1.9467693e+00  -3.8963358e-01
   1.9463449e+01  -2.6435698e+01   4.0000000e+02   4.6135996e-01  -1.9473006e+00  -5.2382965e-01
   1.9531353e+01  -2.6548897e+01   4.0000000e+02   2.9680196e-01  -1.9419038e+00  -6.4990363e-01
   1.9604592e+01  -2.6659438e+01   4.0000000e+02   1.3307851e-01  -1.9300005e+00  -7.6755464e-01
   1.9683050e+01  -2.6767121e+01   4.0000000e+02  -2.9637638e-02  -1.9110544e+00  -8.7659022e-01
   1.9766599e+01  -2.6871753e+01   4.0000000e+02  -1.9118444e-01  -1.8845930e+00  -9.7691447e-01
   1.9855105e+01  -2.6973144e+01   4.0000000e+02  -3.5134477e-01  -1.8502330e+00  -1.0685144e+00
   2.0276273e+01  -2.7525541e+01   4.0000000e+02  -1.1738498e+00  -1.5234080e+00  -1.2136327e+00
   2.0391263e+01  -2.7604104e+01   4.0000000e+02  -1.3106035e+00  -1.4463599e+00  -1.2503152e+00
   2.0509864e+01  -2.7678433e+01   4.0000000e+02  -1.4413863e+00  -1.3622568e+00  -1.2787215e+00
   2.0631879e+01  -2.7748401e+01   4.0000000e+02  -1.5653137e+00  -1.2714531e+00  -1.2984407e+00
   2.0757106e+01  -2.7813887e+01   4.0000000e+02  -1.6815788e+00  -1.1743152e+00  -1.3089504e+00
   2.0885336e+01  -2.7874777e+01   4.0000000e+02  -1.7894865e+00  -1.0712131e+00  -1.3096351e+00
   2.1016352e+01  -2.7930967e+01   4.0000000e+02  -1.8884810e+00  -9.6252283e-01  -1.2998133e+00
   2.1149934e+01  -2.7982360e+01   4.0000000e+02  -1.9781609e+00  -8.4863797e-01  -1.2787867e+00
   2.1285852e+01  -2.8028866e+01   4.0000000e+02  -2.0582837e+00  -7.2999757e-01  -1.2458874e+00
   2.1423876e+01  -2.8070404e+01   4.0000000e+02  -2.1287712e+00  -6.0710861e-01  -1.2005339e+00
   2.1563767e+01  -2.8106902e+01   4.0000000e+02  -2.1897003e+00  -4.8058606e-01  -1.1422847e+00
   2.1705286e+01  -2.8138297e+01   4.0000000e+02  -2.2412982e+00  -3.5117795e-01  -1.0708945e+00
   2.1848187e+01  -2.8164533e+01   4.0000000e+02  -2.2839281e+00  -2.1979658e-01  -9.8636680e-01
   2.1992222e+01  -2.8185565e+01   4.0000000e+02  -2.3180812e+00  -8.7526458e-02  -8.8898811e-01
   2.2137143e+01  -2.8201357e+01   4.0000000e+02  -2.3443632e+00   4.4379493e-02  -7.7935870e-01
   2.2282695e+01  -2.8211879e+01   4.0000000e+02  -2.3634781e+00   1.7451429e-01  -6.5841665e-01
   2.2428627e+01  -2.8217116e+01   4.0000000e+02  -2.3762169e+00   3.0136755e-01  -5.2741546e-01
   2.2574683e+01  -2.8217055e+01   4.0000000e+02  -2.3834350e+00   4.2337221e-01  -3.8793325e-01
   2.2720608e+01  -2.8211700e+01   4.0000000e+02  -2.3860352e+00   5.3897995e-01  -2.4180829e-01
   2.2866149e+01  -2.8201057e+01   4.0000000e+02  -2.3849425e+00   6.4673580e-01  -9.1110669e-02
   2.3011052e+01  -2.8185146e+01   4.0000000e+02  -2.3810803e+00   7.4535022e-01   6.1938474e-02
   2.3155065e+01  -2.8163996e+01   4.0000000e+02  -2.3753442e+00   8.3376697e-01   2.1503457e-01
   2.3297937e+01  -2.8137642e+01   4.0000000e+02  -2.3685779e+00   9.1121404e-01   3.6585946e-01
   2.3439422e+01  -2.8106131e+01   4.0000000e+02  -2.3615501e+00   9.7723747e-01   5.1217026e-01
   2.3579274e+01  -2.8069518e+01   4.0000000e+02  -2.3549369e+00   1.0317095e+00   6.5185182e-01
   2.3717252e+01  -2.8027866e+01   4.0000000e+02  -2.3493081e+00   1.0748204e+00   7.8297727e-01
   2.3853120e+01  -2.7981249e+01   4.0000000e+02  -2.3451186e+00   1.1070475e+00   9.0385201e-01
   2.3986646e+01  -2.7929747e+01   4.0000000e+02  -2.3427081e+00   1.1291108e+00   1.0130270e+00
   2.4117601e+01  -2.7873449e+01   4.0000000e+02  -2.3423041e+00   1.1419174e+00   1.1093102e+00
   2.4245765e+01  -2.7812453e+01   4.0000000e+02  -2.3440296e+00   1.1465027e+00   1.1917700e+00
   2.4370922e+01  -2.7746865e+01   4.0000000e+02  -2.3479158e+00   1.1439697e+00   1.2597115e+00
   2.4492862e+01  -2.7676797e+01   4.0000000e+02  -2.3539168e+00   1.1354338e+00   1.3126550e+00
   2.4611383e+01  -2.7602370e+01   4.0000000e+02  -2.3619230e+00   1.1219735e+00   1.3503190e+00
   2.4726290e+01  -2.7523713e+01   4.0000000e+02  -2.3717765e+00   1.1045905e+00   1.3725924e+00
   2.4837393e+01  -2.7440959e+01   4.0000000e+02  -2.3832844e+00   1.0841803e+00   1.3795024e+00
   2.4944514e+01  -2.7354250e+01   4.0000000e+02  -2.3962265e+00   1.0615097e+00   1.3712106e+00
   2.5047479e+01  -2.7263734e+01   4.0000000e+02  -2.4103623e+00   1.0372081e+00   1.3479801e+00
   2.5146126e+01  -2.7169566e+01   4.0000000e+02  -2.4254314e+00   1.0117618e+00   1.3101731e+00
   2.5240299e+01  -2.7071903e+01   4.0000000e+02  -2.4411531e+00   9.8552183e-01   1.2582226e+00
   2.5329851e+01  -2.6970912e+01   4.0000000e+02  -2.4572175e+00   9.5871234e-01   1.1926409e+00
   2.5414645e+01  -2.6866763e+01   4.0000000e+02  -2.4732789e+00   9.3144624e-01   1.1140015e+00
   2.5494552e+01  -2.6759630e+01   4.0000000e+02  -2.4889469e+00   9.0374393e-01   1.0229339e+00
   2.5569454e+01  -2.6649693e+01   4.0000000e+02  -2.5037778e+00   8.7555130e-01   9.2012722e-01
   2.5639242e+01  -2.6537136e+01   4.0000000e+02  -2.5172714e+00   8.4675945e-01   8.0632270e-01
   2.5703813e+01  -2.6422145e+01   4.0000000e+02  -2.5288719e+00   8.1722220e-01   6.8230574e-01
   2.5763079e+01  -2.6304912e+01   4.0000000e+02  -2.5379747e+00   7.8676537e-01   5.4891961e-01
   2.5816957e+01  -2.6185630e+01   4.0000000e+02  -2.5439395e+00   7.5519893e-01   4.0704281e-01
   2.5865377e+01  -2.6064495e+01   4.0000000e+02  -2.5461099e+00   7.2231718e-01   2.5759395e-01
   2.5908276e+01  -2.5941708e+01   4.0000000e+02  -2.5438354e+00   6.8790026e-01   1.0151931e-01
   2.5945602e+01  -2.5817467e+01   4.0000000e+02  -2.5364957e+00   6.5170655e-01  -6.0228267e-02
   2.5977311e+01  -2.5691977e+01   4.0000000e+02  -2.5235248e+00   6.1346811e-01  -2.2668976e-01
   2.6003372e+01  -2.5565441e+01   4.0000000e+02  -2.5044316e+00   5.7287980e-01  -3.9692277e-01
   2.6023759e+01  -2.5438065e+01   4.0000000e+02  -2.4788145e+00   5.2959625e-01  -5.7001198e-01
   2.6038458e+01  -2.5310053e+01   4.0000000e+02  -2.4463714e+00   4.8322478e-01  -7.4507573e-01
   2.6047463e+01  -2.5181612e+01   4.0000000e+02  -2.4069039e+00   4.3332892e-01  -9.2126107e-01
   2.6050779e+01  -2.5052948e+01   4.0000000e+02  -2.3603148e+00   3.7943277e-01  -1.0977377e+00
   2.6048417e+01  -2.4924267e+01   4.0000000e+02  -2.3066012e+00   3.2103415e-01  -1.2736839e+00
   2.6040400e+01  -2.4795773e+01   4.0000000e+02  -2.2458476e+00   2.5762027e-01  -1.4482586e+00
   2.6026758e+01  -2.4667672e+01   4.0000000e+02  -2.1782171e+00   1.8869251e-01  -1.6205722e+00
   2.6007529e+01  -2.4540166e+01   4.0000000e+02  -2.1039425e+00   1.1378838e-01  -1.7896630e+00
   2.5982761e+01  -2.4413457e+01   4.0000000e+02  -2.0233246e+00   3.2510155e-02  -1.9544637e+00
   2.5952508e+01  -2.4287744e+01   4.0000000e+02  -1.9367266e+00  -5.5451621e-02  -2.1137883e+00
   2.5916835e+01  -2.4163224e+01   4.0000000e+02  -1.8445791e+00  -1.5029480e-01  -2.2663194e+00
   2.5875813e+01  -2.4040093e+01   4.0000000e+02  -1.7473793e+00  -2.5208846e-01  -2.4106166e+00
   2.5829521e+01  -2.3918543e+01   4.0000000e+02  -1.6456924e+00  -3.6076458e-01  -2.5451388e+00
   2.5778045e+01  -2.3798764e+01   4.0000000e+02  -1.5401521e+00  -4.7611435e-01  -2.6682780e+00
   2.5721479e+01  -2.3680941e+01   4.0000000e+02  -1.4314573e+00  -5.9779514e-01  -2.7784074e+00
   2.5659924e+01  -2.3565257e+01   4.0000000e+02  -1.3203667e+00  -7.2534006e-01  -2.8739354e+00
   2.5593487e+01  -2.3451890e+01   4.0000000e+02  -1.2076884e+00  -8.5817793e-01  -2.9533665e+00
   2.5522283e+01  -2.3341017e+01   4.0000000e+02  -1.0942723e+00  -9.9564900e-01  -3.0153569e+00
   2.5446433e+01  -2.3232808e+01   4.0000000e+02  -9.8099432e-01  -1.1370328e+00  -3.0587729e+00
   2.5366063e+01  -2.3127428e+01   4.0000000e+02  -8.6874397e-01  -1.2815683e+00  -3.0827341e+00
   2.5281307e+01  -2.3025039e+01   4.0000000e+02  -7.5841674e-01  -1.4284699e+00  -3.0866482e+00
   2.5192303e+01  -2.2925798e+01   4.0000000e+02  -6.5089810e-01  -1.5769492e+00  -3.0702343e+00
   2.5099196e+01  -2.2829857e+01   4.0000000e+02  -5.4705411e-01  -1.7262274e+00  -3.0335318e+00
   2.5002135e+01  -2.2737362e+01   4.0000000e+02  -4.4771579e-01  -1.8755511e+00  -2.9768936e+00
   2.4901275e+01  -2.2648453e+01   4.0000000e+02  -3.5366568e-01  -2.0242016e+00  -2.9009671e+00
   2.4796777e+01  -2.2563265e+01   4.0000000e+02  -2.6562050e-01  -2.1715030e+00  -2.8066612e+00
   2.4688803e+01  -2.2481928e+01   4.0000000e+02  -1.8420761e-01  -2.3168342e+00  -2.6950983e+00
   2.4577524e+01  -2.2404565e+01   4.0000000e+02  -1.0994850e-01  -2.4596300e+00  -2.5675633e+00
   2.4463110e+01  -2.2331292e+01   4.0000000e+02  -4.3230839e-02  -2.5993925e+00  -2.4254345e+00
   2.4345741e+01  -2.2262222e+01   4.0000000e+02   1.5704980e-02  -2.7356784e+00  -2.2701305e+00
   2.4225595e+01  -2.2197457e+01   4.0000000e+02   6.6789078e-02  -2.8681089e+00  -2.1030323e+00
   2.4102858e+01  -2.2137095e+01   4.0000000e+02   1.1012739e-01  -2.9963453e+00  -1.9254405e+00
   2.3977715e+01  -2.2081227e+01   4.0000000e+02   1.4600973e-01  -3.1200810e+00  -1.7385185e+00
   2.3850358e+01  -2.2029938e+01   4.0000000e+02   1.7490251e-01  -3.2390104e+00  -1.5432709e+00
   2.3720978e+01  -2.1983304e+01   4.0000000e+02   1.9743928e-01  -3.3528089e+00  -1.3405178e+00
   2.3589772e+01  -2.1941395e+01   4.0000000e+02   2.1440049e-01  -3.4610958e+00  -1.1309090e+00
   2.3456937e+01  -2.1904275e+01   4.0000000e+02   2.2669224e-01  -3.5634099e+00  -9.1493609e-01
   2.3322672e+01  -2.1871998e+01   4.0000000e+02   2.3531664e-01  -3.6591838e+00  -6.9296708e-01
   2.3187180e+01  -2.1844614e+01   4.0000000e+02   2.4134649e-01  -3.7477240e+00  -4.6529856e-01
   2.3050662e+01  -2.1822163e+01   4.0000000e+02   2.4589564e-01  -3.8282092e+00  -2.3219413e-01
   2.2913322e+01  -2.1804679e+01   4.0000000e+02   2.5009474e-01  -3.8996932e+00   6.0531944e-03
   2.2775366e+01  -2.1792188e+01   4.0000000e+02   2.5506741e-01  -3.9611276e+00   2.4907415e-01
   2.2637000e+01  -2.1784709e+01   4.0000000e+02   2.6191114e-01  -4.0113989e+00   4.9638392e-01
   2.2498430e+01  -2.1782252e+01   4.0000000e+02   2.7167771e-01  -4.0493792e+00   7.4735085e-01
   2.2359861e+01  -2.1784823e+01   4.0000000e+02   2.8536153e-01  -4.0739868e+00   1.0011752e+00
   2.2221502e+01  -2.1792416e+01   4.0000000e+02   3.0387628e-01  -4.0842555e+00   1.2568739e+00
   2.2083558e+01  -2.1805020e+01   4.0000000e+02   3.2804580e-01  -4.0794071e+00   1.5132934e+00
   2.1946235e+01  -2.1822617e+01   4.0000000e+02   3.5858512e-01  -4.0589188e+00   1.7691120e+00
   2.1809738e+01  -2.1845180e+01   4.0000000e+02   3.9608030e-01  -4.0225828e+00   2.0228617e+00
   2.1674271e+01  -2.1872676e+01   4.0000000e+02   4.4097316e-01  -3.9705505e+00   2.2729483e+00
   2.1540036e+01  -2.1905063e+01   4.0000000e+02   4.9353985e-01  -3.9033562e+00   2.5176785e+00
   2.1407236e+01  -2.1942292e+01   4.0000000e+02   5.5387700e-01  -3.8219206e+00   2.7552771e+00
   2.1276069e+01  -2.1984309e+01   4.0000000e+02   6.2189313e-01  -3.7275242e+00   2.9839198e+00
   2.1146733e+01  -2.2031049e+01   4.0000000e+02   6.9729442e-01  -3.6217649e+00   3.2017476e+00
   2.1019424e+01  -2.2082443e+01   4.0000000e+02   7.7959579e-01  -3.5064910e+00   3.4068865e+00
   2.0894334e+01  -2.2138413e+01   4.0000000e+02   8.6812505e-01  -3.3837196e+00   3.5974745e+00
   2.0771653e+01  -2.2198876e+01   4.0000000e+02   9.6204800e-01  -3.2555504e+00   3.7716780e+00
   2.0651568e+01  -2.2263739e+01   4.0000000e+02   1.0603903e+00  -3.1240773e+00   3.9277236e+00
   2.0534263e+01  -2.2332907e+01   4.0000000e+02   1.1620845e+00  -2.9913065e+00   4.0639271e+00
   2.0419919e+01  -2.2406273e+01   4.0000000e+02   1.2659973e+00  -2.8590886e+00   4.1787416e+00
   2.0308713e+01  -2.2483727e+01   4.0000000e+02   1.3709842e+00  -2.7290659e+00   4.2708012e+00
   2.0200816e+01  -2.2565153e+01   4.0000000e+02   1.4759257e+00  -2.6026384e+00   4.3389787e+00
   2.0096398e+01  -2.2650427e+01   4.0000000e+02   1.5797584e+00  -2.4809596e+00   4.3824369e+00
   1.9995623e+01  -2.2739418e+01   4.0000000e+02   1.6815019e+00  -2.3649378e+00   4.4006881e+00
   1.9898650e+01  -2.2831994e+01   4.0000000e+02   1.7802774e+00  -2.2552620e+00   4.3936304e+00
   1.9805634e+01  -2.2928011e+01   4.0000000e+02   1.8752949e+00  -2.1524372e+00   4.3615927e+00
   1.9716725e+01  -2.3027325e+01   4.0000000e+02   1.9658523e+00  -2.0568260e+00   4.3053347e+00
   1.9632067e+01  -2.3129783e+01   4.0000000e+02   2.0513011e+00  -1.9686883e+00   4.2260534e+00
   1.9551798e+01  -2.3235229e+01   4.0000000e+02   2.1310194e+00  -1.8882201e+00   4.1253441e+00
   1.9476052e+01  -2.3343501e+01   4.0000000e+02   2.2043740e+00  -1.8155849e+00   4.0051511e+00
   1.9404954e+01  -2.3454432e+01   4.0000000e+02   2.2706866e+00  -1.7509258e+00   3.8676973e+00
   1.9338627e+01  -2.3567853e+01   4.0000000e+02   2.3292107e+00  -1.6943810e+00   3.7153841e+00
   1.9277184e+01  -2.3683587e+01   4.0000000e+02   2.3791112e+00  -1.6460656e+00   3.5507108e+00
   1.9220732e+01  -2.3801457e+01   4.0000000e+02   2.4194703e+00  -1.6060616e+00   3.3761561e+00
   1.9169372e+01  -2.3921279e+01   4.0000000e+02   2.4493012e+00  -1.5743931e+00   3.1940955e+00
   1.9123198e+01  -2.4042867e+01   4.0000000e+02   2.4675847e+00  -1.5509991e+00   3.0067103e+00
   1.9082297e+01  -2.4166031e+01   4.0000000e+02   2.4733172e+00  -1.5357080e+00   2.8159278e+00
   1.9046746e+01  -2.4290580e+01   4.0000000e+02   2.4655711e+00  -1.5282147e+00   2.6233774e+00
   1.9016617e+01  -2.4416318e+01   4.0000000e+02   2.4435617e+00  -1.5280749e+00   2.4303787e+00
   1.8991974e+01  -2.4543048e+01   4.0000000e+02   2.4067128e+00  -1.5347020e+00   2.2379461e+00
   1.8972871e+01  -2.4670569e+01   4.0000000e+02   2.3547160e+00  -1.5473749e+00   2.0468284e+00
   1.8959356e+01  -2.4798682e+01   4.0000000e+02   2.2875751e+00  -1.5652658e+00   1.8575427e+00
   1.8951466e+01  -2.4927181e+01   4.0000000e+02   2.2056361e+00  -1.5874616e+00   1.6704553e+00
   1.8949233e+01  -2.5055864e+01   4.0000000e+02   2.1095875e+00  -1.6130070e+00   1.4858208e+00
   1.8952678e+01  -2.5184526e+01   4.0000000e+02   2.0004420e+00  -1.6409316e+00   1.3038614e+00
   1.8961812e+01  -2.5312959e+01   4.0000000e+02   1.8794947e+00  -1.6702832e+00   1.1248175e+00
   1.8976640e+01  -2.5440959e+01   4.0000000e+02   1.7482524e+00  -1.7001593e+00   9.4897259e-01
   1.8997156e+01  -2.5568319e+01   4.0000000e+02   1.6083591e+00  -1.7297177e+00   7.7669251e-01
   1.9023345e+01  -2.5694833e+01   4.0000000e+02   1.4615048e+00  -1.7581871e+00   6.0842462e-01
   1.9055182e+01  -2.5820297e+01   4.0000000e+02   1.3093349e+00  -1.7848644e+00   4.4469038e-01
   1.9092635e+01  -2.5944507e+01   4.0000000e+02   1.1533726e+00  -1.8091073e+00   2.8606320e-01
   1.9135659e+01  -2.6067259e+01   4.0000000e+02   9.9495338e-01  -1.8303152e+00   1.3314690e-01
   1.9184203e+01  -2.6188354e+01   4.0000000e+02   8.3517497e-01  -1.8479179e+00  -1.3470696e-02
   1.9238205e+01  -2.6307592e+01   4.0000000e+02   6.7488577e-01  -1.8613573e+00  -1.5323929e-01
   1.9297592e+01  -2.6424776e+01   4.0000000e+02   5.1468680e-01  -1.8700781e+00  -2.8567831e-01
   1.9362282e+01  -2.6539714e+01   4.0000000e+02   3.5495937e-01  -1.8735261e+00  -4.1040182e-01
   1.9432187e+01  -2.6652214e+01   4.0000000e+02   1.9592039e-01  -1.8711561e+00  -5.2713365e-01
   1.9507204e+01  -2.6762089e+01   4.0000000e+02   3.7681372e-02  -1.8624399e+00  -6.3569980e-01
   1.9587223e+01  -2.6869156e+01   4.0000000e+02  -1.1968371e-01  -1.8468905e+00  -7.3603197e-01
   1.9672127e+01  -2.6973236e+01   4.0000000e+02  -2.7607275e-01  -1.8240838e+00  -8.2815145e-01
   1.9761785e+01  -2.7074154e+01   4.0000000e+02  -4.3129640e-01  -1.7936791e+00  -9.1213690e-01
   1.9856060e+01  -2.7171739e+01   4.0000000e+02  -5.8503975e-01  -1.7554404e+00  -9.8810683e-01
   1.9954807e+01  -2.7265827e+01   4.0000000e+02  -7.3684284e-01  -1.7092452e+00  -1.0561836e+00
   2.0057868e+01  -2.7356258e+01   4.0000000e+02  -8.8609213e-01  -1.6550886e+00  -1.1164561e+00
   2.0165081e+01  -2.7442878e+01   4.0000000e+02  -1.0320430e+00  -1.5930763e+00  -1.1689585e+00
   2.0686306e+01  -2.7925669e+01   4.0000000e+02  -1.7362152e+00  -1.1511151e+00  -1.1165704e+00
   2.0814779e+01  -2.7986786e+01   4.0000000e+02  -1.8397588e+00  -1.0550107e+00  -1.1169072e+00
   2.0945959e+01  -2.8043369e+01   4.0000000e+02  -1.9345105e+00  -9.5357469e-01  -1.1077269e+00
   2.1079638e+01  -2.8095326e+01   4.0000000e+02  -2.0200900e+00  -8.4711000e-01  -1.0883147e+00
   2.1215606e+01  -2.8142574e+01   4.0000000e+02  -2.0962711e+00  -7.3594263e-01  -1.0579618e+00
   2.1353647e+01  -2.8185037e+01   4.0000000e+02  -2.1629762e+00  -6.2045583e-01  -1.0160164e+00
   2.1493540e+01  -2.8222644e+01   4.0000000e+02  -2.2202691e+00  -5.0112546e-01  -9.6194043e-01
   2.1635060e+01  -2.8255337e+01   4.0000000e+02  -2.2683512e+00  -3.7855174e-01  -8.9535026e-01
   2.1777982e+01  -2.8283060e+01   4.0000000e+02  -2.3075480e+00  -2.5348932e-01  -8.1608214e-01
   2.1922073e+01  -2.8305770e+01   4.0000000e+02  -2.3383027e+00  -1.2687060e-01  -7.2421912e-01
   2.2067101e+01  -2.8323429e+01   4.0000000e+02  -2.3611661e+00   1.9364973e-04  -6.2013667e-01
   2.2212832e+01  -2.8336008e+01   4.0000000e+02  -2.3767875e+00   1.2642424e-01  -5.0451882e-01
   2.2359029e+01  -2.8343488e+01   4.0000000e+02  -2.3859035e+00   2.5040228e-01  -3.7836676e-01
   2.2505454e+01  -2.8345856e+01   4.0000000e+02  -2.3893248e+00   3.7061794e-01  -2.4299839e-01
   2.2651871e+01  -2.8343107e+01   4.0000000e+02  -2.3879201e+00   4.8553503e-01  -1.0001937e-01
   2.2798041e+01  -2.8335247e+01   4.0000000e+02  -2.3825973e+00   5.9365816e-01   4.8715638e-02
   2.2943728e+01  -2.8322288e+01   4.0000000e+02  -2.3742801e+00   6.9361168e-01   2.0115357e-01
   2.3088695e+01  -2.8304252e+01   4.0000000e+02  -2.3638844e+00   7.8420694e-01   3.5510941e-01
   2.3232707e+01  -2.8281167e+01   4.0000000e+02  -2.3522933e+00   8.6450442e-01   5.0833428e-01
   2.3375531e+01  -2.8253072e+01   4.0000000e+02  -2.3403322e+00   9.3385657e-01   6.5859669e-01
   2.3516939e+01  -2.8220012e+01   4.0000000e+02  -2.3287478e+00   9.9193327e-01   8.0374832e-01
   2.3656701e+01  -2.8182041e+01   4.0000000e+02  -2.3181905e+00   1.0387216e+00   9.4178018e-01
   2.3794595e+01  -2.8139219e+01   4.0000000e+02  -2.3092027e+00   1.0745132e+00   1.0708806e+00
   2.3930400e+01  -2.8091618e+01   4.0000000e+02  -2.3022108e+00   1.0998665e+00   1.1894692e+00
   2.4063901e+01  -2.8039313e+01   4.0000000e+02  -2.2975269e+00   1.1155628e+00   1.2962088e+00
   2.4194885e+01  -2.7982389e+01   4.0000000e+02  -2.2953523e+00   1.1225503e+00   1.3900158e+00
   2.4323149e+01  -2.7920938e+01   4.0000000e+02  -2.2957863e+00   1.1218859e+00   1.4700594e+00
   2.4448489e+01  -2.7855059e+01   4.0000000e+02  -2.2988410e+00   1.1146803e+00   1.5357303e+00
   2.4570713e+01  -2.7784858e+01   4.0000000e+02  -2.3044533e+00   1.1020442e+00   1.5866368e+00
   2.4689631e+01  -2.7710446e+01   4.0000000e+02  -2.3125036e+00   1.0850457e+00   1.6225636e+00
   2.4805061e+01  -2.7631944e+01   4.0000000e+02  -2.3228264e+00   1.0646720e+00   1.6434624e+00
   2.4916827e+01  -2.7549475e+01   4.0000000e+02  -2.3352274e+00   1.0418045e+00   1.6494138e+00
   2.5024761e+01  -2.7463172e+01   4.0000000e+02  -2.3494891e+00   1.0171979e+00   1.6406209e+00
   2.5128703e+01  -2.7373171e+01   4.0000000e+02  -2.3653795e+00   9.9147161e-01   1.6173791e+00
   2.5228498e+01  -2.7279614e+01   4.0000000e+02  -2.3826532e+00   9.6510796e-01   1.5800620e+00
   2.5324001e+01  -2.7182650e+01   4.0000000e+02  -2.4010473e+00   9.3845392e-01   1.5291148e+00
   2.5415073e+01  -2.7082429e+01   4.0000000e+02  -2.4202775e+00   9.1173341e-01   1.4650294e+00
   2.5501585e+01  -2.6979111e+01   4.0000000e+02  -2.4400253e+00   8.8505819e-01   1.3883541e+00
   2.5583414e+01  -2.6872856e+01   4.0000000e+02  -2.4599314e+00   8.5844812e-01   1.2996679e+00
   2.5660449e+01  -2.6763829e+01   4.0000000e+02  -2.4795832e+00   8.3184635e-01   1.1995907e+00
   2.5732583e+01  -2.6652200e+01   4.0000000e+02  -2.4985093e+00   8.0514192e-01   1.0887747e+00
   2.5799720e+01  -2.6538143e+01   4.0000000e+02  -2.5161770e+00   7.7818390e-01   9.6791009e-01
   2.5861772e+01  -2.6421832e+01   4.0000000e+02  -2.5319970e+00   7.5079722e-01   8.3771735e-01
   2.5918660e+01  -2.6303447e+01   4.0000000e+02  -2.5453334e+00   7.2279221e-01   6.9895851e-01
   2.5970313e+01  -2.6183169e+01   4.0000000e+02  -2.5555208e+00   6.9397073e-01   5.5242725e-01
   2.6016669e+01  -2.6061182e+01   4.0000000e+02  -2.5618870e+00   6.6412648e-01   3.9894923e-01
   2.6057675e+01  -2.5937671e+01   4.0000000e+02  -2.5637770e+00   6.3304131e-01   2.3937162e-01
   2.6093286e+01  -2.5812825e+01   4.0000000e+02  -2.5605789e+00   6.0047928e-01   7.4556806e-02
   2.6123465e+01  -2.5686832e+01   4.0000000e+02  -2.5517465e+00   5.6617736e-01  -9.4637711e-02
   2.6148185e+01  -2.5559882e+01   4.0000000e+02  -2.5368184e+00   5.2983633e-01  -2.6736485e-01
   2.6167426e+01  -2.5432165e+01   4.0000000e+02  -2.5154294e+00   4.9111426e-01  -4.4280398e-01
   2.6181176e+01  -2.5303873e+01   4.0000000e+02  -2.4873171e+00   4.4962248e-01  -6.2016260e-01
   2.6189434e+01  -2.5175198e+01   4.0000000e+02  -2.4523211e+00   4.0492489e-01  -7.9867595e-01
   2.6192204e+01  -2.5046330e+01   4.0000000e+02  -2.4103744e+00   3.5654423e-01  -9.7760704e-01
   2.6189500e+01  -2.4917461e+01   4.0000000e+02  -2.3614953e+00   3.0397342e-01  -1.1562198e+00
   2.6181342e+01  -2.4788782e+01   4.0000000e+02  -2.3057736e+00   2.4669186e-01  -1.3337641e+00
   2.6167759e+01  -2.4660481e+01   4.0000000e+02  -2.2433594e+00   1.8418492e-01  -1.5094468e+00
   2.6148789e+01  -2.4532749e+01   4.0000000e+02  -2.1744572e+00   1.1597135e-01  -1.6823951e+00
   2.6124475e+01  -2.4405771e+01   4.0000000e+02  -2.0993154e+00   4.1624557e-02  -1.8516433e+00
   2.6094868e+01  -2.4279733e+01   4.0000000e+02  -2.0182304e+00  -3.9199059e-02  -2.0161011e+00
   2.6060027e+01  -2.4154819e+01   4.0000000e+02  -1.9315486e+00  -1.2673906e-01  -2.1745461e+00
   2.6020018e+01  -2.4031210e+01   4.0000000e+02  -1.8396713e+00  -2.2111403e-01  -2.3256281e+00
   2.5974912e+01  -2.3909085e+01   4.0000000e+02  -1.7430607e+00  -3.2231019e-01  -2.4678853e+00
   2.5924790e+01  -2.3788621e+01   4.0000000e+02  -1.6422477e+00  -4.3017572e-01  -2.5997711e+00
   2.5869736e+01  -2.3669991e+01   4.0000000e+02  -1.5378298e+00  -5.4442731e-01  -2.7197020e+00
   2.5809843e+01  -2.3553365e+01   4.0000000e+02  -1.4304743e+00  -6.6465740e-01  -2.8261030e+00
   2.5745208e+01  -2.3438912e+01   4.0000000e+02  -1.3209108e+00  -7.9034946e-01  -2.9174646e+00
   2.5675937e+01  -2.3326794e+01   4.0000000e+02  -1.2099248e+00  -9.2089960e-01  -2.9924000e+00
   2.5602138e+01  -2.3217172e+01   4.0000000e+02  -1.0983448e+00  -1.0556357e+00  -3.0496962e+00
   2.5523926e+01  -2.3110201e+01   4.0000000e+02  -9.8703295e-01  -1.1938397e+00  -3.0883608e+00
   2.5441424e+01  -2.3006035e+01   4.0000000e+02  -8.7687622e-01  -1.3347622e+00  -3.1076592e+00
   2.5354757e+01  -2.2904819e+01   4.0000000e+02  -7.6876688e-01  -1.4776494e+00  -3.1071429e+00
   2.5264056e+01  -2.2806699e+01   4.0000000e+02  -6.6359773e-01  -1.6217476e+00  -3.0866639e+00
   2.5169457e+01  -2.2711812e+01   4.0000000e+02  -5.6224428e-01  -1.7663247e+00  -3.0463785e+00
   2.5071102e+01  -2.2620292e+01   4.0000000e+02  -4.6555323e-01  -1.9106750e+00  -2.9867387e+00
   2.4969133e+01  -2.2532269e+01   4.0000000e+02  -3.7432058e-01  -2.0541346e+00  -2.9084677e+00
   2.4863703e+01  -2.2447865e+01   4.0000000e+02  -2.8927889e-01  -2.1960851e+00  -2.8125312e+00
   2.4754962e+01  -2.2367199e+01   4.0000000e+02  -2.1106741e-01  -2.3359680e+00  -2.7000856e+00
   2.4643070e+01  -2.2290385e+01   4.0000000e+02  -1.4021718e-01  -2.4732829e+00  -2.5724331e+00
   2.4528186e+01  -2.2217530e+01   4.0000000e+02  -7.7121861e-02  -2.6076010e+00  -2.4309533e+00
   2.4410476e+01  -2.2148736e+01   4.0000000e+02  -2.2022908e-02  -2.7385569e+00  -2.2770481e+00
   2.4290106e+01  -2.2084099e+01   4.0000000e+02   2.5009529e-02  -2.8658502e+00  -2.1120742e+00
   2.4167247e+01  -2.2023709e+01   4.0000000e+02   6.4083204e-02  -2.9892290e+00  -1.9372924e+00
   2.4042073e+01  -2.1967650e+01   4.0000000e+02   9.5486711e-02  -3.1084742e+00  -1.7538213e+00
   2.3914760e+01  -2.1916000e+01   4.0000000e+02   1.1968390e-01  -3.2233755e+00  -1.5626043e+00
   2.3785486e+01  -2.1868832e+01   4.0000000e+02   1.3730075e-01  -3.3337018e+00  -1.3643948e+00
   2.3654432e+01  -2.1826210e+01   4.0000000e+02   1.4910408e-01  -3.4391704e+00  -1.1597573e+00
   2.3521781e+01  -2.1788195e+01   4.0000000e+02   1.5597962e-01  -3.5394140e+00  -9.4908798e-01
   2.3387718e+01  -2.1754838e+01   4.0000000e+02   1.5890222e-01  -3.6339547e+00  -7.3264507e-01
   2.3252428e+01  -2.1726186e+01   4.0000000e+02   1.5891133e-01  -3.7221831e+00  -5.1059331e-01
   2.3116098e+01  -2.1702278e+01   4.0000000e+02   1.5708253e-01  -3.8033467e+00  -2.8305709e-01
   2.2978918e+01  -2.1683149e+01   4.0000000e+02   1.5450669e-01  -3.8765505e+00  -5.0178368e-02
   2.2841078e+01  -2.1668824e+01   4.0000000e+02   1.5226641e-01  -3.9407758e+00   1.8783840e-01
   2.2702767e+01  -2.1659323e+01   4.0000000e+02   1.5142268e-01  -3.9949097e+00   4.3067999e-01
   2.2564176e+01  -2.1654660e+01   4.0000000e+02   1.5300085e-01  -4.0377884e+00   6.7788312e-01
   2.2425496e+01  -2.1654840e+01   4.0000000e+02   1.5797665e-01  -4.0682548e+00   9.2881339e-01
   2.2286920e+01  -2.1659864e+01   4.0000000e+02   1.6726986e-01  -4.0852232e+00   1.1826464e+00
   2.2148637e+01  -2.1669725e+01   4.0000000e+02   1.8173000e-01  -4.0877503e+00   1.4383783e+00
   2.2010839e+01  -2.1684408e+01   4.0000000e+02   2.0212339e-01  -4.0751041e+00   1.6948223e+00
   2.1873716e+01  -2.1703895e+01   4.0000000e+02   2.2912426e-01  -4.0468279e+00   1.9506328e+00
   2.1737458e+01  -2.1728157e+01   4.0000000e+02   2.6328994e-01  -4.0027932e+00   2.2043283e+00
   2.1602252e+01  -2.1757160e+01   4.0000000e+02   3.0504955e-01  -3.9432345e+00   2.4543218e+00
   2.1468288e+01  -2.1790866e+01   4.0000000e+02   3.5468748e-01  -3.8687683e+00   2.6989362e+00
   2.1335749e+01  -2.1829227e+01   4.0000000e+02   4.1232007e-01  -3.7803809e+00   2.9364515e+00
   2.1204822e+01  -2.1872189e+01   4.0000000e+02   4.7788625e-01  -3.6794061e+00   3.1651063e+00
   2.1075688e+01  -2.1919694e+01   4.0000000e+02   5.5114276e-01  -3.5674673e+00   3.3831352e+00
   2.0948528e+01  -2.1971674e+01   4.0000000e+02   6.3165431e-01  -3.4464152e+00   3.5887774e+00
   2.0823520e+01  -2.2028059e+01   4.0000000e+02   7.1881126e-01  -3.3182450e+00   3.7802946e+00
   2.0700841e+01  -2.2088768e+01   4.0000000e+02   8.1183253e-01  -3.1850150e+00   3.9559874e+00
   2.0580663e+01  -2.2153718e+01   4.0000000e+02   9.0980242e-01  -3.0487584e+00   4.1142178e+00
   2.0463158e+01  -2.2222818e+01   4.0000000e+02   1.0116935e+00  -2.9114137e+00   4.2534286e+00
   2.0348491e+01  -2.2295971e+01   4.0000000e+02   1.1164071e+00  -2.7747549e+00   4.3721847e+00
   2.0236828e+01  -2.2373076e+01   4.0000000e+02   1.2228154e+00  -2.6403547e+00   4.4691980e+00
   2.0128329e+01  -2.2454024e+01   4.0000000e+02   1.3297961e+00  -2.5095506e+00   4.5433855e+00
   2.0023151e+01  -2.2538701e+01   4.0000000e+02   1.4362715e+00  -2.3834400e+00   4.5939107e+00
   1.9921446e+01  -2.2626990e+01   4.0000000e+02   1.5412393e+00  -2.2628878e+00   4.6202317e+00
   1.9823365e+01  -2.2718765e+01   4.0000000e+02   1.6437829e+00  -2.1485559e+00   4.6221456e+00
   1.9729052e+01  -2.2813897e+01   4.0000000e+02   1.7430843e+00  -2.0409298e+00   4.5998238e+00
   1.9638647e+01  -2.2912253e+01   4.0000000e+02   1.8384168e+00  -1.9403630e+00   4.5538285e+00
   1.9552286e+01  -2.3013693e+01   4.0000000e+02   1.9291235e+00  -1.8471182e+00   4.4851200e+00
   1.9470099e+01  -2.3118074e+01   4.0000000e+02   2.0145951e+00  -1.7614020e+00   4.3950367e+00
   1.9392212e+01  -2.3225247e+01   4.0000000e+02   2.0942352e+00  -1.6833973e+00   4.2852605e+00
   1.9318746e+01  -2.3335061e+01   4.0000000e+02   2.1674304e+00  -1.6132819e+00   4.1577561e+00
   1.9249816e+01  -2.3447358e+01   4.0000000e+02   2.2335173e+00  -1.5512339e+00   4.0147086e+00
   1.9185531e+01  -2.3561979e+01   4.0000000e+02   2.2917651e+00  -1.4974276e+00   3.8584296e+00
   1.9125995e+01  -2.3678760e+01   4.0000000e+02   2.3413634e+00  -1.4520192e+00   3.6912749e+00
   1.9071306e+01  -2.3797532e+01   4.0000000e+02   2.3814272e+00  -1.4151216e+00   3.5155569e+00
   1.9021554e+01  -2.3918126e+01   4.0000000e+02   2.4110180e+00  -1.3867755e+00   3.3334555e+00
   1.8976826e+01  -2.4040367e+01   4.0000000e+02   2.4291769e+00  -1.3669258e+00   3.1469570e+00
   1.8937199e+01  -2.4164080e+01   4.0000000e+02   2.4349714e+00  -1.3553895e+00   2.9577980e+00
   1.8902746e+01  -2.4289084e+01   4.0000000e+02   2.4275522e+00  -1.3518442e+00   2.7674420e+00
   1.8873531e+01  -2.4415198e+01   4.0000000e+02   2.4062124e+00  -1.3558162e+00   2.5770649e+00
   1.8849613e+01  -2.4542239e+01   4.0000000e+02   2.3704475e+00  -1.3666880e+00   2.3875692e+00
   1.8831043e+01  -2.4670020e+01   4.0000000e+02   2.3200073e+00  -1.3837091e+00   2.1996224e+00
   1.8817863e+01  -2.4798355e+01   4.0000000e+02   2.2549350e+00  -1.4060211e+00   2.0136953e+00
   1.8810111e+01  -2.4927055e+01   4.0000000e+02   2.1755921e+00  -1.4326940e+00   1.8301183e+00
   1.8807813e+01  -2.5055931e+01   4.0000000e+02   2.0826582e+00  -1.4627540e+00   1.6491413e+00
   1.8810992e+01  -2.5184791e+01   4.0000000e+02   1.9771167e+00  -1.4952292e+00   1.4709817e+00
   1.8819658e+01  -2.5313444e+01   4.0000000e+02   1.8602092e+00  -1.5291722e+00   1.2958745e+00
   1.8833818e+01  -2.5441700e+01   4.0000000e+02   1.7333775e+00  -1.5636968e+00   1.1240947e+00
   1.8853467e+01  -2.5569366e+01   4.0000000e+02   1.5981934e+00  -1.5979855e+00   9.5599151e-01
   1.8878595e+01  -2.5696251e+01   4.0000000e+02   1.4562727e+00  -1.6313049e+00   7.9197924e-01
   1.8909179e+01  -2.5822166e+01   4.0000000e+02   1.3091923e+00  -1.6629952e+00   6.3253971e-01
   1.8945193e+01  -2.5946919e+01   4.0000000e+02   1.1584195e+00  -1.6924688e+00   4.7819639e-01
   1.8986599e+01  -2.6070322e+01   4.0000000e+02   1.0052413e+00  -1.7191867e+00   3.2949289e-01
   1.9033352e+01  -2.6192188e+01   4.0000000e+02   8.5072242e-01  -1.7426431e+00   1.8696073e-01
   1.9085398e+01  -2.6312332e+01   4.0000000e+02   6.9568247e-01  -1.7623460e+00   5.1091907e-02
   1.9142673e+01  -2.6430569e+01   4.0000000e+02   5.4069988e-01  -1.7778033e+00  -7.7684764e-02
   1.9205107e+01  -2.6546718e+01   4.0000000e+02   3.8613058e-01  -1.7885176e+00  -1.9903131e-01
   1.9272619e+01  -2.6660601e+01   4.0000000e+02   2.3215377e-01  -1.7939843e+00  -3.1270552e-01
   1.9345121e+01  -2.6772041e+01   4.0000000e+02   7.8831364e-02  -1.7937038e+00  -4.1857025e-01
   1.9422517e+01  -2.6880867e+01   4.0000000e+02  -7.3832535e-02  -1.7871962e+00  -5.1658881e-01
   1.9504699e+01  -2.6986910e+01   4.0000000e+02  -2.2581966e-01  -1.7740223e+00  -6.0680725e-01
   1.9591555e+01  -2.7090003e+01   4.0000000e+02  -3.7704129e-01  -1.7538103e+00  -6.8934760e-01
   1.9682962e+01  -2.7189986e+01   4.0000000e+02  -5.2729480e-01  -1.7262728e+00  -7.6437415e-01
   1.9778789e+01  -2.7286702e+01   4.0000000e+02  -6.7622997e-01  -1.6912255e+00  -8.3207108e-01
   1.9878898e+01  -2.7379999e+01   4.0000000e+02  -8.2334054e-01  -1.6485954e+00  -8.9261413e-01
   1.9983142e+01  -2.7469729e+01   4.0000000e+02  -9.6796947e-01  -1.5984202e+00  -9.4613954e-01
   2.0091368e+01  -2.7555751e+01   4.0000000e+02  -1.1093372e+00  -1.5408371e+00  -9.9271762e-01
   2.0203413e+01  -2.7637929e+01   4.0000000e+02  -1.2465738e+00  -1.4760666e+00  -1.0323248e+00
   2.0319108e+01  -2.7716131e+01   4.0000000e+02  -1.3787636e+00  -1.4043897e+00  -1.0648304e+00
   2.0438279e+01  -2.7790233e+01   4.0000000e+02  -1.5049967e+00  -1.3261209e+00  -1.0899810e+00
   2.0560741e+01  -2.7860116e+01   4.0000000e+02  -1.6244065e+00  -1.2415886e+00  -1.1073945e+00
   2.1165322e+01  -2.8262981e+01   4.0000000e+02  -2.1369999e+00  -7.2371413e-01  -8.5740674e-01
   2.1302850e+01  -2.8305387e+01   4.0000000e+02  -2.1982826e+00  -6.1599862e-01  -8.1739106e-01
   2.1442164e+01  -2.8343157e+01   4.0000000e+02  -2.2504542e+00  -5.0440295e-01  -7.6618636e-01
   2.1583055e+01  -2.8376234e+01   4.0000000e+02  -2.2937024e+00  -3.8940090e-01  -7.0333682e-01
   2.1725317e+01  -2.8404569e+01   4.0000000e+02  -2.3283254e+00  -2.7160848e-01  -6.2856219e-01
   2.1868736e+01  -2.8428119e+01   4.0000000e+02  -2.3547223e+00  -1.5181599e-01  -5.4180327e-01
   2.2013100e+01  -2.8446848e+01   4.0000000e+02  -2.3733897e+00  -3.0990889e-02  -4.4325405e-01
   2.2158193e+01  -2.8460729e+01   4.0000000e+02  -2.3849153e+00   8.9722030e-02  -3.3338608e-01
   2.2303797e+01  -2.8469741e+01   4.0000000e+02  -2.3899717e+00   2.0902332e-01  -2.1296925e-01
   2.2449696e+01  -2.8473871e+01   4.0000000e+02  -2.3893080e+00   3.2550089e-01  -8.3068119e-02
   2.2595669e+01  -2.8473111e+01   4.0000000e+02  -2.3837386e+00   4.3767797e-01   5.4959084e-02
   2.2741500e+01  -2.8467463e+01   4.0000000e+02  -2.3741282e+00   5.4408545e-01   1.9950362e-01
   2.2886969e+01  -2.8456936e+01   4.0000000e+02  -2.3613724e+00   6.4332509e-01   3.4873345e-01
   2.3031858e+01  -2.8441545e+01   4.0000000e+02  -2.3463769e+00   7.3414392e-01   5.0065028e-01
   2.3175951e+01  -2.8421314e+01   4.0000000e+02  -2.3300320e+00   8.1549628e-01   6.5315719e-01
   2.3319033e+01  -2.8396273e+01   4.0000000e+02  -2.3131896e+00   8.8659338e-01   8.0412005e-01
   2.3460892e+01  -2.8366459e+01   4.0000000e+02  -2.2966390e+00   9.4693752e-01   9.5143939e-01
   2.3601315e+01  -2.8331918e+01   4.0000000e+02  -2.2810875e+00   9.9633441e-01   1.0931109e+00
   2.3740095e+01  -2.8292700e+01   4.0000000e+02  -2.2671446e+00   1.0348920e+00   1.2272819e+00
   2.3877028e+01  -2.8248866e+01   4.0000000e+02  -2.2553098e+00   1.0629949e+00   1.3522996e+00
   2.4011913e+01  -2.8200479e+01   4.0000000e+02  -2.2459712e+00   1.0812702e+00   1.4667269e+00
   2.4144550e+01  -2.8147613e+01   4.0000000e+02  -2.2394034e+00   1.0905385e+00   1.5693671e+00
   2.4274749e+01  -2.8090347e+01   4.0000000e+02  -2.2357742e+00   1.0917634e+00   1.6592695e+00
   2.4402319e+01  -2.8028764e+01   4.0000000e+02  -2.2351576e+00   1.0859980e+00   1.7357043e+00
   2.4527078e+01  -2.7962957e+01   4.0000000e+02  -2.2375418e+00   1.0743319e+00   1.7981680e+00
   2.4648847e+01  -2.7893024e+01   4.0000000e+02  -2.2428480e+00   1.0578462e+00   1.8463474e+00
   2.4767452e+01  -2.7819066e+01   4.0000000e+02  -2.2509463e+00   1.0375753e+00   1.8800953e+00
   2.4882727e+01  -2.7741195e+01   4.0000000e+02  -2.2616653e+00   1.0144720e+00   1.8994221e+00
   2.4994510e+01  -2.7659523e+01   4.0000000e+02  -2.2748114e+00   9.8938752e-01   1.9044522e+00
   2.5102647e+01  -2.7574171e+01   4.0000000e+02  -2.2901730e+00   9.6305254e-01   1.8954212e+00
   2.5206988e+01  -2.7485263e+01   4.0000000e+02  -2.3075305e+00   9.3607082e-01   1.8726437e+00
   2.5307391e+01  -2.7392930e+01   4.0000000e+02  -2.3266552e+00   9.0891421e-01   1.8365069e+00
   2.5403722e+01  -2.7297305e+01   4.0000000e+02  -2.3473092e+00   8.8192660e-01   1.7874486e+00
   2.5495852e+01  -2.7198528e+01   4.0000000e+02  -2.3692371e+00   8.5533215e-01   1.7259485e+00
   2.5583660e+01  -2.7096740e+01   4.0000000e+02  -2.3921586e+00   8.2924707e-01   1.6525125e+00
   2.5667033e+01  -2.6992090e+01   4.0000000e+02  -2.4157540e+00   8.0369334e-01   1.5676750e+00
   2.5745863e+01  -2.6884727e+01   4.0000000e+02  -2.4396562e+00   7.7861881e-01   1.4719799e+00
   2.5820052e+01  -2.6774804e+01   4.0000000e+02  -2.4634391e+00   7.5391178e-01   1.3659897e+00
   2.5889508e+01  -2.6662480e+01   4.0000000e+02  -2.4866121e+00   7.2942023e-01   1.2502871e+00
   2.5954147e+01  -2.6547913e+01   4.0000000e+02  -2.5086221e+00   7.0496681e-01   1.1254693e+00
   2.6013892e+01  -2.6431267e+01   4.0000000e+02  -2.5288587e+00   6.8036072e-01   9.9216321e-01
   2.6068675e+01  -2.6312706e+01   4.0000000e+02  -2.5466691e+00   6.5540517e-01   8.5102193e-01
   2.6118434e+01  -2.6192397e+01   4.0000000e+02  -2.5613775e+00   6.2990202e-01   7.0272909e-01
   2.6163116e+01  -2.6070510e+01   4.0000000e+02  -2.5723089e+00   6.0364943e-01   5.4800051e-01
   2.6202673e+01  -2.5947215e+01   4.0000000e+02  -2.5788153e+00   5.7643867e-01   3.8757115e-01
   2.6237069e+01  -2.5822683e+01   4.0000000e+02  -2.5803013e+00   5.4804319e-01   2.2219467e-01
   2.6266271e+01  -2.5697088e+01   4.0000000e+02  -2.5762451e+00   5.1821357e-01   5.2627839e-02
   2.6290256e+01  -2.5570605e+01   4.0000000e+02  -2.5662163e+00   4.8666530e-01  -1.2037810e-01
   2.6309007e+01  -2.5443407e+01   4.0000000e+02  -2.5498845e+00   4.5307210e-01  -2.9609582e-01
   2.6322517e+01  -2.5315670e+01   4.0000000e+02  -2.5270229e+00   4.1706090e-01  -4.7381727e-01
   2.6330782e+01  -2.5187569e+01   4.0000000e+02  -2.4975020e+00   3.7821264e-01  -6.5286730e-01
   2.6333808e+01  -2.5059280e+01   4.0000000e+02  -2.4612812e+00   3.3606490e-01  -8.3258845e-01
   2.6331608e+01  -2.4930976e+01   4.0000000e+02  -2.4183931e+00   2.9012104e-01  -1.0123360e+00
   2.6324201e+01  -2.4802834e+01   4.0000000e+02  -2.3689299e+00   2.3986719e-01  -1.1914488e+00
   2.6311613e+01  -2.4675025e+01   4.0000000e+02  -2.3130267e+00   1.8478707e-01  -1.3692365e+00
   2.6293876e+01  -2.4547724e+01   4.0000000e+02  -2.2508534e+00   1.2438814e-01  -1.5449386e+00
   2.6271031e+01  -2.4421101e+01   4.0000000e+02  -2.1826068e+00   5.8221486e-02  -1.7177067e+00
   2.6243123e+01  -2.4295326e+01   4.0000000e+02  -2.1085101e+00  -1.4091914e-02  -1.8865797e+00
   2.6210204e+01  -2.4170568e+01   4.0000000e+02  -2.0288180e+00  -9.2839662e-02  -2.0504676e+00
   2.6172332e+01  -2.4046993e+01   4.0000000e+02  -1.9438243e+00  -1.7820078e-01  -2.2081518e+00
   2.6129572e+01  -2.3924766e+01   4.0000000e+02  -1.8538735e+00  -2.7023122e-01  -2.3582910e+00
   2.6081993e+01  -2.3804049e+01   4.0000000e+02  -1.7593691e+00  -3.6885891e-01  -2.4994479e+00
   2.6029673e+01  -2.3685003e+01   4.0000000e+02  -1.6607853e+00  -4.7388113e-01  -2.6301180e+00
   2.5972691e+01  -2.3567783e+01   4.0000000e+02  -1.5586643e+00  -5.8497697e-01  -2.7487810e+00
   2.5911136e+01  -2.3452546e+01   4.0000000e+02  -1.4536271e+00  -7.0171062e-01  -2.8539389e+00
   2.5845100e+01  -2.3339442e+01   4.0000000e+02  -1.3463601e+00  -8.2355678e-01  -2.9441773e+00
   2.5774679e+01  -2.3228620e+01   4.0000000e+02  -1.2376119e+00  -9.4991475e-01  -3.0182097e+00
   2.5699977e+01  -2.3120225e+01   4.0000000e+02  -1.1281851e+00  -1.0801282e+00  -3.0749247e+00
   2.5621100e+01  -2.3014399e+01   4.0000000e+02  -1.0189215e+00  -1.2135060e+00  -3.1134252e+00
   2.5538160e+01  -2.2911279e+01   4.0000000e+02  -9.1069256e-01  -1.3493388e+00  -3.1330600e+00
   2.5451275e+01  -2.2810999e+01   4.0000000e+02  -8.0438860e-01  -1.4869120e+00  -3.1334454e+00
   2.5360563e+01  -2.2713691e+01   4.0000000e+02  -7.0090184e-01  -1.6255209e+00  -3.1144769e+00
   2.5266151e+01  -2.2619479e+01   4.0000000e+02  -6.0111705e-01  -1.7644811e+00  -3.0763334e+00
   2.5168167e+01  -2.2528487e+01   4.0000000e+02  -5.0589319e-01  -1.9031362e+00  -3.0194669e+00
   2.5066744e+01  -2.2440831e+01   4.0000000e+02  -4.1604563e-01  -2.0408710e+00  -2.9445845e+00
   2.4962018e+01  -2.2356625e+01   4.0000000e+02  -3.3232677e-01  -2.1771166e+00  -2.8526185e+00
   2.4854130e+01  -2.2275976e+01   4.0000000e+02  -2.5540397e-01  -2.3113607e+00  -2.7446880e+00
   2.4743223e+01  -2.2198990e+01   4.0000000e+02  -1.8583628e-01  -2.4431534e+00  -2.6220508e+00
   2.4629442e+01  -2.2125764e+01   4.0000000e+02  -1.2405135e-01  -2.5721167e+00  -2.4860460e+00
   2.4512939e+01  -2.2056393e+01   4.0000000e+02  -7.0329545e-02  -2.6979386e+00  -2.3380438e+00
   2.4393864e+01  -2.1990966e+01   4.0000000e+02  -2.4783931e-02  -2.8203787e+00  -2.1793769e+00
   2.4272374e+01  -2.1929566e+01   4.0000000e+02   1.2644445e-02  -2.9392522e+00  -2.0112950e+00
   2.4148626e+01  -2.1872271e+01   4.0000000e+02   4.2191570e-02  -3.0544187e+00  -1.8349116e+00
   2.4022779e+01  -2.1819156e+01   4.0000000e+02   6.4264536e-02  -3.1657580e+00  -1.6511705e+00
   2.3894996e+01  -2.1770288e+01   4.0000000e+02   7.9427523e-02  -3.2731424e+00  -1.4608251e+00
   2.3765441e+01  -2.1725729e+01   4.0000000e+02   8.8384151e-02  -3.3764061e+00  -1.2644307e+00
   2.3634279e+01  -2.1685536e+01   4.0000000e+02   9.1953970e-02  -3.4753129e+00  -1.0623549e+00
   2.3501680e+01  -2.1649760e+01   4.0000000e+02   9.1045522e-02  -3.5695223e+00  -8.5480931e-01
   2.3367810e+01  -2.1618447e+01   4.0000000e+02   8.6631344e-02  -3.6585703e+00  -6.4187572e-01
   2.3232841e+01  -2.1591636e+01   4.0000000e+02   7.9720459e-02  -3.7418447e+00  -4.2356817e-01
   2.3096944e+01  -2.1569362e+01   4.0000000e+02   7.1338413e-02  -3.8185827e+00  -1.9987718e-01
   2.2960291e+01  -2.1551654e+01   4.0000000e+02   6.2507490e-02  -3.8878751e+00   2.9174247e-02
   2.2823057e+01  -2.1538532e+01   4.0000000e+02   5.4229971e-02  -3.9486843e+00   2.6347746e-01
   2.2685413e+01  -2.1530015e+01   4.0000000e+02   4.7483075e-02  -3.9998804e+00   5.0280363e-01
   2.2547535e+01  -2.1526113e+01   4.0000000e+02   4.3205597e-02  -4.0402825e+00   7.4675734e-01
   2.2409597e+01  -2.1526832e+01   4.0000000e+02   4.2295645e-02  -4.0687170e+00   9.9476430e-01
   2.2271773e+01  -2.1532169e+01   4.0000000e+02   4.5600830e-02  -4.0840802e+00   1.2460588e+00
   2.2134238e+01  -2.1542118e+01   4.0000000e+02   5.3916957e-02  -4.0854053e+00   1.4996813e+00
   2.1997165e+01  -2.1556667e+01   4.0000000e+02   6.7977206e-02  -4.0719287e+00   1.7544966e+00
   2.1860729e+01  -2.1575798e+01   4.0000000e+02   8.8441150e-02  -4.0431499e+00   2.0092061e+00
   2.1725102e+01  -2.1599485e+01   4.0000000e+02   1.1587878e-01  -3.9988814e+00   2.2623843e+00
   2.1590456e+01  -2.1627699e+01   4.0000000e+02   1.5075990e-01  -3.9392826e+00   2.5125013e+00
   2.1456963e+01  -2.1660403e+01   4.0000000e+02   1.9343132e-01  -3.8648769e+00   2.7579546e+00
   2.1324792e+01  -2.1697557e+01   4.0000000e+02   2.4410540e-01  -3.7765453e+00   2.9971025e+00
   2.1194112e+01  -2.1739113e+01   4.0000000e+02   3.0283831e-01  -3.6755025e+00   3.2282842e+00
   2.1065091e+01  -2.1785018e+01   4.0000000e+02   3.6952123e-01  -3.5632518e+00   3.4498424e+00
   2.0937892e+01  -2.1835213e+01   4.0000000e+02   4.4387206e-01  -3.4415207e+00   3.6601462e+00
   2.0812680e+01  -2.1889635e+01   4.0000000e+02   5.2543705e-01  -3.3121945e+00   3.8575902e+00
   2.0689616e+01  -2.1948213e+01   4.0000000e+02   6.1359250e-01  -3.1772330e+00   4.0406172e+00
   2.0568860e+01  -2.2010874e+01   4.0000000e+02   7.0756779e-01  -3.0385962e+00   4.2077210e+00
   2.0450568e+01  -2.2077536e+01   4.0000000e+02   8.0645838e-01  -2.8981688e+00   4.3574686e+00
   2.0334895e+01  -2.2148115e+01   4.0000000e+02   9.0926495e-01  -2.7577033e+00   4.4885107e+00
   2.0221992e+01  -2.2222520e+01   4.0000000e+02   1.0149207e+00  -2.6187698e+00   4.5996137e+00
   2.0112007e+01  -2.2300655e+01   4.0000000e+02   1.1223311e+00  -2.4827276e+00   4.6896887e+00
   2.0005087e+01  -2.2382421e+01   4.0000000e+02   1.2304124e+00  -2.3507150e+00   4.7578249e+00
   1.9901373e+01  -2.2467711e+01   4.0000000e+02   1.3381182e+00  -2.2236465e+00   4.8033397e+00
   1.9801004e+01  -2.2556416e+01   4.0000000e+02   1.4444728e+00  -2.1022351e+00   4.8258088e+00
   1.9704116e+01  -2.2648422e+01   4.0000000e+02   1.5485846e+00  -1.9870201e+00   4.8251064e+00
   1.9610841e+01  -2.2743609e+01   4.0000000e+02   1.6496516e+00  -1.8784007e+00   4.8014359e+00
   1.9521305e+01  -2.2841855e+01   4.0000000e+02   1.7469611e+00  -1.7766727e+00   4.7553438e+00
   1.9435633e+01  -2.2943031e+01   4.0000000e+02   1.8398706e+00  -1.6820717e+00   4.6877241e+00
   1.9353944e+01  -2.3047007e+01   4.0000000e+02   1.9277909e+00  -1.5948006e+00   4.5998014e+00
   1.9276353e+01  -2.3153647e+01   4.0000000e+02   2.0101534e+00  -1.5150559e+00   4.4931057e+00
   1.9202970e+01  -2.3262812e+01   4.0000000e+02   2.0863839e+00  -1.4430422e+00   4.3694234e+00
   1.9133901e+01  -2.3374359e+01   4.0000000e+02   2.1558752e+00  -1.3789762e+00   4.2307385e+00
   1.9069247e+01  -2.3488141e+01   4.0000000e+02   2.2179657e+00  -1.3230787e+00   4.0791641e+00
   1.9009104e+01  -2.3604011e+01   4.0000000e+02   2.2719309e+00  -1.2755587e+00   3.9168602e+00
   1.8953562e+01  -2.3721815e+01   4.0000000e+02   2.3169781e+00  -1.2365852e+00   3.7459705e+00
   1.8902707e+01  -2.3841398e+01   4.0000000e+02   2.3522635e+00  -1.2062639e+00   3.5685397e+00
   1.8856619e+01  -2.3962601e+01   4.0000000e+02   2.3769153e+00  -1.1846044e+00   3.3864580e+00
   1.8815371e+01  -2.4085264e+01   4.0000000e+02   2.3900706e+00  -1.1714945e+00   3.2014086e+00
   1.8779032e+01  -2.4209225e+01   4.0000000e+02   2.3909213e+00  -1.1666844e+00   3.0148359e+00
   1.8747664e+01  -2.4334317e+01   4.0000000e+02   2.3787634e+00  -1.1697722e+00   2.8279400e+00
   1.8721324e+01  -2.4460373e+01   4.0000000e+02   2.3530505e+00  -1.1802082e+00   2.6416709e+00
   1.8700062e+01  -2.4587226e+01   4.0000000e+02   2.3134412e+00  -1.1973039e+00   2.4567526e+00
   1.8683922e+01  -2.4714703e+01   4.0000000e+02   2.2598415e+00  -1.2202525e+00   2.2737259e+00
   1.8672941e+01  -2.4842634e+01   4.0000000e+02   2.1924311e+00  -1.2481599e+00   2.0929785e+00
   1.8667150e+01  -2.4970845e+01   4.0000000e+02   2.1116795e+00  -1.2800777e+00   1.9148025e+00
   1.8666572e+01  -2.5099163e+01   4.0000000e+02   2.0183379e+00  -1.3150394e+00   1.7394355e+00
   1.8671226e+01  -2.5227412e+01   4.0000000e+02   1.9134201e+00  -1.3520980e+00   1.5671041e+00
   1.8681121e+01  -2.5355419e+01   4.0000000e+02   1.7981546e+00  -1.3903507e+00   1.3980547e+00
   1.8696260e+01  -2.5483007e+01   4.0000000e+02   1.6739351e+00  -1.4289647e+00   1.2325816e+00
   1.8716639e+01  -2.5610002e+01   4.0000000e+02   1.5422466e+00  -1.4671911e+00   1.0710301e+00
   1.8742248e+01  -2.5736228e+01   4.0000000e+02   1.4045964e+00  -1.5043683e+00   9.1380084e-01
   1.8773067e+01  -2.5861510e+01   4.0000000e+02   1.2624383e+00  -1.5399142e+00   7.6134048e-01
   1.8809070e+01  -2.5985676e+01   4.0000000e+02   1.1171031e+00  -1.5733164e+00   6.1411841e-01
   1.8850225e+01  -2.6108553e+01   4.0000000e+02   9.6974915e-01  -1.6041142e+00   4.7260766e-01
   1.8896490e+01  -2.6229968e+01   4.0000000e+02   8.2132311e-01  -1.6318747e+00   3.3726372e-01
   1.8947817e+01  -2.6349751e+01   4.0000000e+02   6.7253849e-01  -1.6561771e+00   2.0849409e-01
   1.9004149e+01  -2.6467735e+01   4.0000000e+02   5.2387887e-01  -1.6765948e+00   8.6642453e-02
   1.9065423e+01  -2.6583752e+01   4.0000000e+02   3.7562529e-01  -1.6926898e+00  -2.8028579e-02
   1.9131567e+01  -2.6697639e+01   4.0000000e+02   2.2789021e-01  -1.7040081e+00  -1.3534548e-01
   1.9202504e+01  -2.6809234e+01   4.0000000e+02   8.0674523e-02  -1.7100912e+00  -2.3522979e-01
   1.9278145e+01  -2.6918377e+01   4.0000000e+02  -6.6071155e-02  -1.7104857e+00  -3.2768639e-01
   1.9358398e+01  -2.7024914e+01   4.0000000e+02  -2.1239201e-01  -1.7047677e+00  -4.1280499e-01
   1.9443161e+01  -2.7128690e+01   4.0000000e+02  -3.5826276e-01  -1.6925640e+00  -4.9073739e-01
   1.9532325e+01  -2.7229558e+01   4.0000000e+02  -5.0355266e-01  -1.6735721e+00  -5.6168137e-01
   1.9625774e+01  -2.7327370e+01   4.0000000e+02  -6.4798446e-01  -1.6475820e+00  -6.2586162e-01
   1.9723385e+01  -2.7421987e+01   4.0000000e+02  -7.9113078e-01  -1.6144836e+00  -6.8350229e-01
   1.9825027e+01  -2.7513269e+01   4.0000000e+02  -9.3240596e-01  -1.5742743e+00  -7.3480620e-01
   1.9930563e+01  -2.7601086e+01   4.0000000e+02  -1.0710969e+00  -1.5270481e+00  -7.7992595e-01
   2.0039849e+01  -2.7685307e+01   4.0000000e+02  -1.2063828e+00  -1.4729873e+00  -8.1894715e-01
   2.0152735e+01  -2.7765810e+01   4.0000000e+02  -1.3373855e+00  -1.4123367e+00  -8.5186112e-01
   2.0269062e+01  -2.7842477e+01   4.0000000e+02  -1.4632065e+00  -1.3453825e+00  -8.7854932e-01
   2.0388669e+01  -2.7915196e+01   4.0000000e+02  -1.5829756e+00  -1.2724257e+00  -8.9877771e-01
   2.0511386e+01  -2.7983857e+01   4.0000000e+02  -1.6958827e+00  -1.1937641e+00  -9.1219169e-01
   2.0637038e+01  -2.8048361e+01   4.0000000e+02  -1.8012180e+00  -1.1096720e+00  -9.1831435e-01
   2.0765445e+01  -2.8108612e+01   4.0000000e+02  -1.8983887e+00  -1.0203980e+00  -9.1657041e-01
   2.0896422e+01  -2.8164520e+01   4.0000000e+02  -1.9869342e+00  -9.2616740e-01  -9.0630637e-01
   2.1029779e+01  -2.8216002e+01   4.0000000e+02  -2.0665328e+00  -8.2719607e-01  -8.8682108e-01
   2.1696587e+01  -2.8530550e+01   4.0000000e+02  -2.3461552e+00  -2.7112762e-01  -4.2147839e-01
   2.1840388e+01  -2.8554221e+01   4.0000000e+02  -2.3672357e+00  -1.5749941e-01  -3.3775889e-01
   2.1985113e+01  -2.8573223e+01   4.0000000e+02  -2.3807561e+00  -4.2475929e-02  -2.4273011e-01
   2.2130560e+01  -2.8587531e+01   4.0000000e+02  -2.3872647e+00   7.2883540e-02  -1.3672327e-01
   2.2276525e+01  -2.8597124e+01   4.0000000e+02  -2.3873921e+00   1.8735563e-01  -2.0351215e-02
   2.2422804e+01  -2.8601989e+01   4.0000000e+02  -2.3818476e+00   2.9958876e-01   1.0549117e-01
   2.2569191e+01  -2.8602118e+01   4.0000000e+02  -2.3714107e+00   4.0815069e-01   2.3962491e-01
   2.2715481e+01  -2.8597512e+01   4.0000000e+02  -2.3569199e+00   5.1159126e-01   3.8061419e-01
   2.2861468e+01  -2.8588178e+01   4.0000000e+02  -2.3392553e+00   6.0850864e-01   5.2679179e-01
   2.3006949e+01  -2.8574127e+01   4.0000000e+02  -2.3193196e+00   6.9762114e-01   6.7630557e-01
   2.3151719e+01  -2.8555381e+01   4.0000000e+02  -2.2980131e+00   7.7782647e-01   8.2717956e-01
   2.3295575e+01  -2.8531965e+01   4.0000000e+02  -2.2762105e+00   8.4825890e-01   9.7736836e-01
   2.3438319e+01  -2.8503913e+01   4.0000000e+02  -2.2547339e+00   9.0832705e-01   1.1248359e+00
   2.3579750e+01  -2.8471263e+01   4.0000000e+02  -2.2343344e+00   9.5773212e-01   1.2676006e+00
   2.3719672e+01  -2.8434062e+01   4.0000000e+02  -2.2156697e+00   9.9647205e-01   1.4038099e+00
   2.3857891e+01  -2.8392362e+01   4.0000000e+02  -2.1992930e+00   1.0248257e+00   1.5317773e+00
   2.3994218e+01  -2.8346222e+01   4.0000000e+02  -2.1856441e+00   1.0433223e+00   1.6500234e+00
   2.4128466e+01  -2.8295705e+01   4.0000000e+02  -2.1750496e+00   1.0527004e+00   1.7572890e+00
   2.4260450e+01  -2.8240882e+01   4.0000000e+02  -2.1677249e+00   1.0538590e+00   1.8525488e+00
   2.4389991e+01  -2.8181830e+01   4.0000000e+02  -2.1637825e+00   1.0478070e+00   1.9350103e+00
   2.4516915e+01  -2.8118631e+01   4.0000000e+02  -2.1632447e+00   1.0356124e+00   2.0040995e+00
   2.4641050e+01  -2.8051372e+01   4.0000000e+02  -2.1660595e+00   1.0183576e+00   2.0594384e+00
   2.4762232e+01  -2.7980147e+01   4.0000000e+02  -2.1721129e+00   9.9709666e-01   2.1008335e+00
   2.4880300e+01  -2.7905054e+01   4.0000000e+02  -2.1812484e+00   9.7282401e-01   2.1282419e+00
   2.4995099e+01  -2.7826197e+01   4.0000000e+02  -2.1932788e+00   9.4644701e-01   2.1417554e+00
   2.5106478e+01  -2.7743684e+01   4.0000000e+02  -2.2080008e+00   9.1876822e-01   2.1415730e+00
   2.5214294e+01  -2.7657628e+01   4.0000000e+02  -2.2252018e+00   8.9047084e-01   2.1279871e+00
   2.5318409e+01  -2.7568147e+01   4.0000000e+02  -2.2446669e+00   8.6211334e-01   2.1013609e+00
   2.5418691e+01  -2.7475363e+01   4.0000000e+02  -2.2661791e+00   8.3412800e-01   2.0621118e+00
   2.5515015e+01  -2.7379402e+01   4.0000000e+02  -2.2895164e+00   8.0682379e-01   2.0106964e+00
   2.5607260e+01  -2.7280395e+01   4.0000000e+02  -2.3144435e+00   7.8039525e-01   1.9475953e+00
   2.5695315e+01  -2.7178474e+01   4.0000000e+02  -2.3407021e+00   7.5493158e-01   1.8733013e+00
   2.5779072e+01  -2.7073779e+01   4.0000000e+02  -2.3679955e+00   7.3043299e-01   1.7883149e+00
   2.5858433e+01  -2.6966448e+01   4.0000000e+02  -2.3959788e+00   7.0682546e-01   1.6931301e+00
   2.5933304e+01  -2.6856627e+01   4.0000000e+02  -2.4242447e+00   6.8397929e-01   1.5882437e+00
   2.6003599e+01  -2.6744461e+01   4.0000000e+02  -2.4523184e+00   6.6172577e-01   1.4741479e+00
   2.6069240e+01  -2.6630099e+01   4.0000000e+02  -2.4796554e+00   6.3987173e-01   1.3513438e+00
   2.6130153e+01  -2.6513695e+01   4.0000000e+02  -2.5056463e+00   6.1821445e-01   1.2203483e+00
   2.6186274e+01  -2.6395400e+01   4.0000000e+02  -2.5296324e+00   5.9654812e-01   1.0816948e+00
   2.6237544e+01  -2.6275372e+01   4.0000000e+02  -2.5509220e+00   5.7467013e-01   9.3595172e-01
   2.6283911e+01  -2.6153767e+01   4.0000000e+02  -2.5688178e+00   5.5238067e-01   7.8371416e-01
   2.6325330e+01  -2.6030745e+01   4.0000000e+02  -2.5826426e+00   5.2947843e-01   6.2561284e-01
   2.6361764e+01  -2.5906467e+01   4.0000000e+02  -2.5917671e+00   5.0575321e-01   4.6230565e-01
   2.6393181e+01  -2.5781093e+01   4.0000000e+02  -2.5956348e+00   4.8097769e-01   2.9446336e-01
   2.6419557e+01  -2.5654786e+01   4.0000000e+02  -2.5937804e+00   4.5489651e-01   1.2276713e-01
   2.6440874e+01  -2.5527710e+01   4.0000000e+02  -2.5858426e+00   4.2721797e-01  -5.2108227e-02
   2.6457122e+01  -2.5400027e+01   4.0000000e+02  -2.5715677e+00   3.9760588e-01  -2.2950727e-01
   2.6468295e+01  -2.5271901e+01   4.0000000e+02  -2.5508060e+00   3.6567784e-01  -4.0879770e-01
   2.6474395e+01  -2.5143497e+01   4.0000000e+02  -2.5235011e+00   3.3100454e-01  -5.8936902e-01
   2.6475432e+01  -2.5014978e+01   4.0000000e+02  -2.4896740e+00   2.9311462e-01  -7.7063046e-01
   2.6471419e+01  -2.4886507e+01   4.0000000e+02  -2.4494033e+00   2.5150658e-01  -9.5199829e-01
   2.6462377e+01  -2.4758246e+01   4.0000000e+02  -2.4028078e+00   2.0566205e-01  -1.1328723e+00
   2.6448333e+01  -2.4630359e+01   4.0000000e+02  -2.3500307e+00   1.5506635e-01  -1.3126079e+00
   2.6429320e+01  -2.4503005e+01   4.0000000e+02  -2.2912263e+00   9.9227396e-02  -1.4904978e+00
   2.6405378e+01  -2.4376344e+01   4.0000000e+02  -2.2265575e+00   3.7701050e-02  -1.6657366e+00
   2.6376549e+01  -2.4250535e+01   4.0000000e+02  -2.1561949e+00  -2.9886818e-02  -1.8374061e+00
   2.6342885e+01  -2.4125735e+01   4.0000000e+02  -2.0803278e+00  -1.0382004e-01  -2.0044561e+00
   2.6304441e+01  -2.4002099e+01   4.0000000e+02  -1.9991737e+00  -1.8427516e-01  -2.1657077e+00
   2.6261278e+01  -2.3879780e+01   4.0000000e+02  -1.9129942e+00  -2.7130946e-01  -2.3198604e+00
   2.6213463e+01  -2.3758931e+01   4.0000000e+02  -1.8221114e+00  -3.6485346e-01  -2.4655121e+00
   2.6161066e+01  -2.3639699e+01   4.0000000e+02  -1.7269149e+00  -4.6471616e-01  -2.6011992e+00
   2.6104165e+01  -2.3522232e+01   4.0000000e+02  -1.6278773e+00  -5.7058582e-01  -2.7254287e+00
   2.6042840e+01  -2.3406674e+01   4.0000000e+02  -1.5255511e+00  -6.8204699e-01  -2.8367322e+00
   2.5977179e+01  -2.3293167e+01   4.0000000e+02  -1.4205717e+00  -7.9859297e-01  -2.9337092e+00
   2.5907270e+01  -2.3181849e+01   4.0000000e+02  -1.3136459e+00  -9.1964865e-01  -3.0150787e+00
   2.5833210e+01  -2.3072856e+01   4.0000000e+02  -1.2055492e+00  -1.0445838e+00  -3.0797171e+00
   2.5755099e+01  -2.2966321e+01   4.0000000e+02  -1.0971111e+00  -1.1727341e+00  -3.1266980e+00
   2.5673039e+01  -2.2862374e+01   4.0000000e+02  -9.8920133e-01  -1.3034180e+00  -3.1553216e+00
   2.5587139e+01  -2.2761140e+01   4.0000000e+02  -8.8272039e-01  -1.4359493e+00  -3.1651369e+00
   2.5497509e+01  -2.2662741e+01   4.0000000e+02  -7.7858246e-01  -1.5696501e+00  -3.1559545e+00
   2.5404267e+01  -2.2567298e+01   4.0000000e+02  -6.7770672e-01  -1.7038555e+00  -3.1278540e+00
   2.5307530e+01  -2.2474924e+01   4.0000000e+02  -5.8099213e-01  -1.8379327e+00  -3.0811784e+00
   2.5207421e+01  -2.2385731e+01   4.0000000e+02  -4.8930707e-01  -1.9712802e+00  -3.0165235e+00
   2.5104067e+01  -2.2299826e+01   4.0000000e+02  -4.0346609e-01  -2.1033405e+00  -2.9347161e+00
   2.4997595e+01  -2.2217313e+01   4.0000000e+02  -3.2420614e-01  -2.2336106e+00  -2.8367802e+00
   2.4888140e+01  -2.2138290e+01   4.0000000e+02  -2.5216750e-01  -2.3616463e+00  -2.7239018e+00
   2.4775834e+01  -2.2062851e+01   4.0000000e+02  -1.8786568e-01  -2.4870766e+00  -2.5973736e+00
   2.4660818e+01  -2.1991088e+01   4.0000000e+02  -1.3167710e-01  -2.6095986e+00  -2.4585523e+00
   2.4543230e+01  -2.1923085e+01   4.0000000e+02  -8.3815665e-02  -2.7289903e+00  -2.3087896e+00
   2.4423215e+01  -2.1858924e+01   4.0000000e+02  -4.4326439e-02  -2.8450953e+00  -2.1493876e+00
   2.4300916e+01  -2.1798682e+01   4.0000000e+02  -1.3076864e-02  -2.9578204e+00  -1.9815364e+00
   2.4176483e+01  -2.1742429e+01   4.0000000e+02   1.0237085e-02  -3.0671106e+00  -1.8062792e+00
   2.4050064e+01  -2.1690233e+01   4.0000000e+02   2.6084245e-02  -3.1729302e+00  -1.6244719e+00
   2.3921812e+01  -2.1642156e+01   4.0000000e+02   3.5079241e-02  -3.2752283e+00  -1.4367701e+00
   2.3791878e+01  -2.1598255e+01   4.0000000e+02   3.7961871e-02  -3.3739106e+00  -1.2436191e+00
   2.3660419e+01  -2.1558582e+01   4.0000000e+02   3.5570179e-02  -3.4687992e+00  -1.0452766e+00
   2.3527589e+01  -2.1523184e+01   4.0000000e+02   2.8814658e-02  -3.5596078e+00  -8.4182935e-01
   2.3393548e+01  -2.1492103e+01   4.0000000e+02   1.8651050e-02  -3.6459093e+00  -6.3324572e-01
   2.3258453e+01  -2.1465376e+01   4.0000000e+02   6.0571329e-03  -3.7271238e+00  -4.1941282e-01
   2.3122465e+01  -2.1443035e+01   4.0000000e+02  -7.9876646e-03  -3.8025076e+00  -2.0020104e-01
   2.2985743e+01  -2.1425105e+01   4.0000000e+02  -2.2518928e-02  -3.8711612e+00   2.4490167e-02
   2.2848449e+01  -2.1411609e+01   4.0000000e+02  -3.6595007e-02  -3.9320461e+00   2.5467119e-01
   2.2710745e+01  -2.1402561e+01   4.0000000e+02  -4.9308137e-02  -3.9840169e+00   4.9022347e-01
   2.2572793e+01  -2.1397974e+01   4.0000000e+02  -5.9782513e-02  -4.0258660e+00   7.3086201e-01
   2.2434756e+01  -2.1397852e+01   4.0000000e+02  -6.7181495e-02  -4.0563760e+00   9.7611105e-01
   2.2296795e+01  -2.1402195e+01   4.0000000e+02  -7.0705387e-02  -4.0743827e+00   1.2252961e+00
   2.2159073e+01  -2.1410999e+01   4.0000000e+02  -6.9593081e-02  -4.0788389e+00   1.4775370e+00
   2.2021753e+01  -2.1424252e+01   4.0000000e+02  -6.3130013e-02  -4.0688799e+00   1.7317628e+00
   2.1884995e+01  -2.1441940e+01   4.0000000e+02  -5.0650144e-02  -4.0438844e+00   1.9867375e+00
   2.1748963e+01  -2.1464041e+01   4.0000000e+02  -3.1551820e-02  -4.0035256e+00   2.2410753e+00
   2.1613815e+01  -2.1490528e+01   4.0000000e+02  -5.3091865e-03  -3.9478071e+00   2.4932920e+00
   2.1479712e+01  -2.1521372e+01   4.0000000e+02   2.8515363e-02  -3.8770870e+00   2.7418212e+00
   2.1346812e+01  -2.1556535e+01   4.0000000e+02   7.0245795e-02  -3.7920764e+00   2.9850602e+00
   2.1215274e+01  -2.1595975e+01   4.0000000e+02   1.2008008e-01  -3.6938244e+00   3.2213914e+00
   2.1085253e+01  -2.1639647e+01   4.0000000e+02   1.7807567e-01  -3.5836774e+00   3.4492157e+00
   2.0956904e+01  -2.1687497e+01   4.0000000e+02   2.4412902e-01  -3.4632285e+00   3.6669649e+00
   2.0830381e+01  -2.1739469e+01   4.0000000e+02   3.1797617e-01  -3.3342512e+00   3.8731145e+00
   2.0705835e+01  -2.1795501e+01   4.0000000e+02   3.9918576e-01  -3.1986243e+00   4.0661962e+00
   2.0583416e+01  -2.1855528e+01   4.0000000e+02   4.8716805e-01  -3.0582594e+00   4.2447983e+00
   2.0463272e+01  -2.1919476e+01   4.0000000e+02   5.8117921e-01  -2.9150287e+00   4.4075753e+00
   2.0345548e+01  -2.1987271e+01   4.0000000e+02   6.8035393e-01  -2.7707011e+00   4.5532538e+00
   2.0230387e+01  -2.2058831e+01   4.0000000e+02   7.8372067e-01  -2.6268935e+00   4.6806463e+00
   2.0117930e+01  -2.2134070e+01   4.0000000e+02   8.9023901e-01  -2.4850352e+00   4.7886692e+00
   2.0008315e+01  -2.2212900e+01   4.0000000e+02   9.9883685e-01  -2.3463467e+00   4.8763673e+00
   1.9901677e+01  -2.2295225e+01   4.0000000e+02   1.1084366e+00  -2.2118359e+00   4.9429483e+00
   1.9798149e+01  -2.2380947e+01   4.0000000e+02   1.2179955e+00  -2.0823086e+00   4.9878118e+00
   1.9697859e+01  -2.2469962e+01   4.0000000e+02   1.3265267e+00  -1.9583863e+00   5.0105902e+00
   1.9600935e+01  -2.2562165e+01   4.0000000e+02   1.4331246e+00  -1.8405434e+00   5.0111714e+00
   1.9507498e+01  -2.2657444e+01   4.0000000e+02   1.5369661e+00  -1.7291320e+00   4.9897360e+00
   1.9417668e+01  -2.2755684e+01   4.0000000e+02   1.6373158e+00  -1.6244278e+00   4.9467654e+00
   1.9331561e+01  -2.2856766e+01   4.0000000e+02   1.7335147e+00  -1.5266604e+00   4.8830499e+00
   1.9249288e+01  -2.2960568e+01   4.0000000e+02   1.8249630e+00  -1.4360420e+00   4.7996796e+00
   1.9170958e+01  -2.3066965e+01   4.0000000e+02   1.9110971e+00  -1.3527935e+00   4.6980190e+00
   1.9096674e+01  -2.3175827e+01   4.0000000e+02   1.9913611e+00  -1.2771513e+00   4.5796766e+00
   1.9026536e+01  -2.3287021e+01   4.0000000e+02   2.0651846e+00  -1.2093733e+00   4.4464520e+00
   1.8960640e+01  -2.3400412e+01   4.0000000e+02   2.1319624e+00  -1.1497299e+00   4.3002769e+00
   1.8899076e+01  -2.3515861e+01   4.0000000e+02   2.1910382e+00  -1.0984828e+00   4.1431556e+00
   1.8841930e+01  -2.3633227e+01   4.0000000e+02   2.2417020e+00  -1.0558643e+00   3.9770948e+00
   1.8789285e+01  -2.3752366e+01   4.0000000e+02   2.2831953e+00  -1.0220491e+00   3.8040405e+00
   1.8741217e+01  -2.3873132e+01   4.0000000e+02   2.3147275e+00  -9.9711979e-01   3.6258215e+00
   1.8697798e+01  -2.3995374e+01   4.0000000e+02   2.3355024e+00  -9.8104287e-01   3.4441056e+00
   1.8659095e+01  -2.4118942e+01   4.0000000e+02   2.3447559e+00  -9.7364794e-01   3.2603559e+00
   1.8625168e+01  -2.4243682e+01   4.0000000e+02   2.3417952e+00  -9.7461018e-01   3.0758221e+00
   1.8596073e+01  -2.4369440e+01   4.0000000e+02   2.3260458e+00  -9.8345281e-01   2.8915285e+00
   1.8571862e+01  -2.4496058e+01   4.0000000e+02   2.2970961e+00  -9.9955279e-01   2.7082919e+00
   1.8552579e+01  -2.4623378e+01   4.0000000e+02   2.2547362e+00  -1.0221546e+00   2.5267428e+00
   1.8538262e+01  -2.4751241e+01   4.0000000e+02   2.1989910e+00  -1.0503989e+00   2.3473588e+00
   1.8528946e+01  -2.4879485e+01   4.0000000e+02   2.1301429e+00  -1.0833580e+00   2.1705045e+00
   1.8524657e+01  -2.5007949e+01   4.0000000e+02   2.0487355e+00  -1.1200656e+00   1.9964708e+00
   1.8525417e+01  -2.5136470e+01   4.0000000e+02   1.9555664e+00  -1.1595585e+00   1.8255130e+00
   1.8531240e+01  -2.5264884e+01   4.0000000e+02   1.8516611e+00  -1.2009051e+00   1.6578847e+00
   1.8542136e+01  -2.5393029e+01   4.0000000e+02   1.7382301e+00  -1.2432387e+00   1.4938551e+00
   1.8558106e+01  -2.5520741e+01   4.0000000e+02   1.6166171e+00  -1.2857699e+00   1.3337334e+00
   1.8579146e+01  -2.5647854e+01   4.0000000e+02   1.4882378e+00  -1.3278025e+00   1.1778695e+00
   1.8605246e+01  -2.5774207e+01   4.0000000e+02   1.3545052e+00  -1.3687338e+00   1.0266438e+00
   1.8636388e+01  -2.5899636e+01   4.0000000e+02   1.2167710e+00  -1.4080436e+00   8.8046717e-01
   1.8672548e+01  -2.6023979e+01   4.0000000e+02   1.0762618e+00  -1.4452819e+00   7.3975724e-01
   1.8713696e+01  -2.6147074e+01   4.0000000e+02   9.3403183e-01  -1.4800488e+00   6.0492114e-01
   1.8759793e+01  -2.6268760e+01   4.0000000e+02   7.9092997e-01  -1.5119698e+00   4.7633801e-01
   1.8810796e+01  -2.6388879e+01   4.0000000e+02   6.4758176e-01  -1.5406806e+00   3.5433416e-01
   1.8866653e+01  -2.6507272e+01   4.0000000e+02   5.0439865e-01  -1.5658054e+00   2.3917596e-01
   1.8927306e+01  -2.6623784e+01   4.0000000e+02   3.6159465e-01  -1.5869500e+00   1.3105305e-01
   1.8992690e+01  -2.6738261e+01   4.0000000e+02   2.1922817e-01  -1.6036986e+00   3.0075327e-02
   1.9062733e+01  -2.6850551e+01   4.0000000e+02   7.7251335e-02  -1.6156200e+00  -6.3728487e-02
   1.9137356e+01  -2.6960505e+01   4.0000000e+02  -6.4433782e-02  -1.6222809e+00  -1.5040702e-01
   1.9216473e+01  -2.7067975e+01   4.0000000e+02  -2.0591430e-01  -1.6232657e+00  -2.3007842e-01
   1.9299993e+01  -2.7172819e+01   4.0000000e+02  -3.4721825e-01  -1.6181984e+00  -3.0292070e-01
   1.9387815e+01  -2.7274895e+01   4.0000000e+02  -4.8826119e-01  -1.6067647e+00  -3.6915234e-01
   1.9479834e+01  -2.7374065e+01   4.0000000e+02  -6.2882090e-01  -1.5887334e+00  -4.2902256e-01
   1.9575937e+01  -2.7470196e+01   4.0000000e+02  -7.6852048e-01  -1.5639677e+00  -4.8278717e-01
   1.9676006e+01  -2.7563157e+01   4.0000000e+02  -9.0682675e-01  -1.5324341e+00  -5.3069385e-01
   1.9779915e+01  -2.7652821e+01   4.0000000e+02  -1.0430663e+00  -1.4941980e+00  -5.7295727e-01
   1.9887532e+01  -2.7739068e+01   4.0000000e+02  -1.1764575e+00  -1.4494118e+00  -6.0973772e-01
   1.9998720e+01  -2.7821778e+01   4.0000000e+02  -1.3061412e+00  -1.3983002e+00  -6.4112785e-01
   2.0113335e+01  -2.7900838e+01   4.0000000e+02  -1.4312293e+00  -1.3411327e+00  -6.6712648e-01
   2.0231228e+01  -2.7976139e+01   4.0000000e+02  -1.5508444e+00  -1.2782007e+00  -6.8762842e-01
   2.0352244e+01  -2.8047578e+01   4.0000000e+02  -1.6641605e+00  -1.2097913e+00  -7.0241140e-01
   2.0476222e+01  -2.8115056e+01   4.0000000e+02  -1.7704335e+00  -1.1361701e+00  -7.1113527e-01
   2.0602998e+01  -2.8178480e+01   4.0000000e+02  -1.8690285e+00  -1.0575660e+00  -7.1334641e-01
   2.0732401e+01  -2.8237761e+01   4.0000000e+02  -1.9594314e+00  -9.7417043e-01  -7.0849003e-01
   2.0864256e+01  -2.8292817e+01   4.0000000e+02  -2.0412589e+00  -8.8614145e-01  -6.9592960e-01
   2.0998384e+01  -2.8343571e+01   4.0000000e+02  -2.1142570e+00  -7.9362129e-01  -6.7497839e-01
   2.1134602e+01  -2.8389953e+01   4.0000000e+02  -2.1782961e+00  -6.9676082e-01  -6.4493164e-01
   2.1272723e+01  -2.8431898e+01   4.0000000e+02  -2.2333627e+00  -5.9575253e-01  -6.0511000e-01
   2.1412557e+01  -2.8469346e+01   4.0000000e+02  -2.2795501e+00  -4.9086567e-01  -5.5490319e-01
   2.1553910e+01  -2.8502246e+01   4.0000000e+02  -2.3170521e+00  -3.8248195e-01  -4.9380737e-01
   2.2269128e+01  -2.8725255e+01   4.0000000e+02  -2.3764669e+00   1.7704005e-01   1.9024285e-01
   2.2415792e+01  -2.8730185e+01   4.0000000e+02  -2.3655860e+00   2.8433681e-01   3.1223601e-01
   2.2562566e+01  -2.8730523e+01   4.0000000e+02  -2.3499143e+00   3.8838457e-01   4.4240862e-01
   2.2709259e+01  -2.8726270e+01   4.0000000e+02  -2.3302660e+00   4.8776572e-01   5.7947536e-01
   2.2855675e+01  -2.8717431e+01   4.0000000e+02  -2.3075070e+00   5.8109398e-01   7.2191195e-01
   2.3001624e+01  -2.8704018e+01   4.0000000e+02  -2.2825335e+00   6.6708809e-01   8.6800961e-01
   2.3146912e+01  -2.8686049e+01   4.0000000e+02  -2.2562509e+00   7.4462839e-01   1.0159127e+00
   2.3291350e+01  -2.8663546e+01   4.0000000e+02  -2.2295481e+00   8.1281630e-01   1.1636836e+00
   2.3434748e+01  -2.8636541e+01   4.0000000e+02  -2.2032701e+00   8.7100944e-01   1.3093662e+00
   2.3576918e+01  -2.8605068e+01   4.0000000e+02  -2.1781977e+00   9.1884898e-01   1.4510395e+00
   2.3717676e+01  -2.8569169e+01   4.0000000e+02  -2.1550233e+00   9.5626430e-01   1.5868859e+00
   2.3856838e+01  -2.8528892e+01   4.0000000e+02  -2.1343378e+00   9.8346146e-01   1.7152315e+00
   2.3994225e+01  -2.8484289e+01   4.0000000e+02  -2.1166201e+00   1.0008992e+00   1.8345879e+00
   2.4129659e+01  -2.8435419e+01   4.0000000e+02  -2.1022329e+00   1.0092501e+00   1.9436761e+00
   2.4262966e+01  -2.8382346e+01   4.0000000e+02  -2.0914250e+00   1.0093572e+00   2.0414403e+00
   2.4393977e+01  -2.8325140e+01   4.0000000e+02  -2.0843374e+00   1.0021849e+00   2.1270515e+00
   2.4522525e+01  -2.8263874e+01   4.0000000e+02  -2.0810171e+00   9.8877221e-01   2.1998919e+00
   2.4648447e+01  -2.8198630e+01   4.0000000e+02  -2.0814272e+00   9.7018561e-01   2.2595492e+00
   2.4771586e+01  -2.8129492e+01   4.0000000e+02  -2.0854662e+00   9.4748089e-01   2.3057909e+00
   2.4891788e+01  -2.8056549e+01   4.0000000e+02  -2.0929839e+00   9.2166920e-01   2.3385421e+00
   2.5008905e+01  -2.7979897e+01   4.0000000e+02  -2.1037944e+00   8.9368832e-01   2.3578695e+00
   2.5122793e+01  -2.7899633e+01   4.0000000e+02  -2.1176951e+00   8.6438496e-01   2.3639493e+00
   2.5233313e+01  -2.7815863e+01   4.0000000e+02  -2.1344729e+00   8.3449720e-01   2.3570587e+00
   2.5340333e+01  -2.7728693e+01   4.0000000e+02  -2.1539170e+00   8.0464717e-01   2.3375464e+00
   2.5443724e+01  -2.7638234e+01   4.0000000e+02  -2.1758211e+00   7.7533712e-01   2.3058175e+00
   2.5543365e+01  -2.7544604e+01   4.0000000e+02  -2.1999806e+00   7.4694596e-01   2.2623228e+00
   2.5639139e+01  -2.7447920e+01   4.0000000e+02  -2.2261930e+00   7.1973772e-01   2.2075293e+00
   2.5730936e+01  -2.7348306e+01   4.0000000e+02  -2.2542432e+00   6.9386482e-01   2.1419178e+00
   2.5818651e+01  -2.7245887e+01   4.0000000e+02  -2.2838946e+00   6.6938171e-01   2.0659608e+00
   2.5902185e+01  -2.7140794e+01   4.0000000e+02  -2.3148717e+00   6.4625658e-01   1.9801215e+00
   2.5981446e+01  -2.7033159e+01   4.0000000e+02  -2.3468474e+00   6.2438779e-01   1.8848417e+00
   2.6056348e+01  -2.6923116e+01   4.0000000e+02  -2.3794300e+00   6.0362098e-01   1.7805426e+00
   2.6126811e+01  -2.6810803e+01   4.0000000e+02  -2.4121536e+00   5.8376551e-01   1.6676319e+00
   2.6192761e+01  -2.6696360e+01   4.0000000e+02  -2.4444767e+00   5.6461037e-01   1.5465095e+00
   2.6254129e+01  -2.6579929e+01   4.0000000e+02  -2.4757874e+00   5.4593764e-01   1.4175788e+00
   2.6310856e+01  -2.6461654e+01   4.0000000e+02  -2.5054152e+00   5.2752901e-01   1.2812622e+00
   2.6362886e+01  -2.6341682e+01   4.0000000e+02  -2.5326522e+00   5.0917476e-01   1.1380090e+00
   2.6410170e+01  -2.6220159e+01   4.0000000e+02  -2.5567789e+00   4.9067252e-01   9.8830074e-01
   2.6452665e+01  -2.6097235e+01   4.0000000e+02  -2.5770917e+00   4.7182407e-01   8.3266163e-01
   2.6490336e+01  -2.5973060e+01   4.0000000e+02  -2.5929337e+00   4.5242789e-01   6.7165264e-01
   2.6523153e+01  -2.5847785e+01   4.0000000e+02  -2.6037208e+00   4.3227144e-01   5.0586422e-01
   2.6551090e+01  -2.5721561e+01   4.0000000e+02  -2.6089627e+00   4.1112119e-01   3.3590352e-01
   2.6574131e+01  -2.5594542e+01   4.0000000e+02  -2.6082779e+00   3.8871049e-01   1.6239117e-01
   2.6592264e+01  -2.5466880e+01   4.0000000e+02  -2.6013989e+00   3.6473352e-01  -1.4063843e-02
   2.6605482e+01  -2.5338729e+01   4.0000000e+02  -2.5881686e+00   3.3883956e-01  -1.9286749e-01
   2.6613785e+01  -2.5210243e+01   4.0000000e+02  -2.5685298e+00   3.1063033e-01  -3.7344770e-01
   2.6617180e+01  -2.5081574e+01   4.0000000e+02  -2.5425073e+00   2.7966216e-01  -5.5525643e-01
   2.6615678e+01  -2.4952875e+01   4.0000000e+02  -2.5101860e+00   2.4545452e-01  -7.3775958e-01
   2.6609296e+01  -2.4824299e+01   4.0000000e+02  -2.4716888e+00   2.0750084e-01  -9.2042144e-01
   2.6598056e+01  -2.4695999e+01   4.0000000e+02  -2.4271556e+00   1.6528459e-01  -1.1026837e+00
   2.6581987e+01  -2.4568124e+01   4.0000000e+02  -2.3767260e+00   1.1829654e-01  -1.2839431e+00
   2.6561123e+01  -2.4440827e+01   4.0000000e+02  -2.3205320e+00   6.6059306e-02  -1.4635150e+00
   2.6535501e+01  -2.4314254e+01   4.0000000e+02  -2.2586909e+00   8.1450787e-03  -1.6406238e+00
   2.6505167e+01  -2.4188555e+01   4.0000000e+02  -2.1913174e+00  -5.5798658e-02  -1.8143641e+00
   2.6470168e+01  -2.4063876e+01   4.0000000e+02  -2.1185299e+00  -1.2603339e-01  -1.9837062e+00
   2.6430559e+01  -2.3940361e+01   4.0000000e+02  -2.0404716e+00  -2.0271360e-01  -2.1474871e+00
   2.6386398e+01  -2.3818154e+01   4.0000000e+02  -1.9573280e+00  -2.8587564e-01  -2.3044243e+00
   2.6337749e+01  -2.3697395e+01   4.0000000e+02  -1.8693458e+00  -3.7543558e-01  -2.4531409e+00
   2.6284679e+01  -2.3578225e+01   4.0000000e+02  -1.7768495e+00  -4.7118852e-01  -2.5921954e+00
   2.6227262e+01  -2.3460779e+01   4.0000000e+02  -1.6802508e+00  -5.7281986e-01  -2.7201273e+00
   2.6165574e+01  -2.3345193e+01   4.0000000e+02  -1.5800546e+00  -6.7991443e-01  -2.8354969e+00
   2.6099696e+01  -2.3231599e+01   4.0000000e+02  -1.4768577e+00  -7.9197497e-01  -2.9369346e+00
   2.6029713e+01  -2.3120126e+01   4.0000000e+02  -1.3713432e+00  -9.0843953e-01  -3.0231827e+00
   2.5955714e+01  -2.3010902e+01   4.0000000e+02  -1.2642721e+00  -1.0286977e+00  -3.0931338e+00
   2.5877794e+01  -2.2904050e+01   4.0000000e+02  -1.1564715e+00  -1.1521094e+00  -3.1458661e+00
   2.5796047e+01  -2.2799692e+01   4.0000000e+02  -1.0488179e+00  -1.2780197e+00  -3.1806694e+00
   2.5710576e+01  -2.2697946e+01   4.0000000e+02  -9.4222964e-01  -1.4057687e+00  -3.1970660e+00
   2.5621484e+01  -2.2598927e+01   4.0000000e+02  -8.3764555e-01  -1.5347054e+00  -3.1948241e+00
   2.5528878e+01  -2.2502747e+01   4.0000000e+02  -7.3601282e-01  -1.6641941e+00  -3.1739646e+00
   2.5432870e+01  -2.2409513e+01   4.0000000e+02  -6.3826966e-01  -1.7936229e+00  -3.1347613e+00
   2.5333573e+01  -2.2319331e+01   4.0000000e+02  -5.4532556e-01  -1.9224111e+00  -3.0777315e+00
   2.5231104e+01  -2.2232302e+01   4.0000000e+02  -4.5804116e-01  -2.0500187e+00  -3.0036208e+00
   2.5125583e+01  -2.2148524e+01   4.0000000e+02  -3.7720609e-01  -2.1759543e+00  -2.9133785e+00
   2.5017132e+01  -2.2068090e+01   4.0000000e+02  -3.0351476e-01  -2.2997867e+00  -2.8081234e+00
   2.4905878e+01  -2.1991089e+01   4.0000000e+02  -2.3754548e-01  -2.4211508e+00  -2.6891043e+00
   2.4791947e+01  -2.1917609e+01   4.0000000e+02  -1.7973681e-01  -2.5397582e+00  -2.5576491e+00
   2.4675470e+01  -2.1847731e+01   4.0000000e+02  -1.3037173e-01  -2.6553989e+00  -2.4151142e+00
   2.4556580e+01  -2.1781533e+01   4.0000000e+02  -8.9564250e-02  -2.7679412e+00  -2.2628288e+00
   2.4435411e+01  -2.1719088e+01   4.0000000e+02  -5.7252779e-02  -2.8773257e+00  -2.1020387e+00
   2.4312100e+01  -2.1660467e+01   4.0000000e+02  -3.3201671e-02  -2.9835487e+00  -1.9338615e+00
   2.4186786e+01  -2.1605733e+01   4.0000000e+02  -1.7009669e-02  -3.0866429e+00  -1.7592420e+00
   2.4059608e+01  -2.1554947e+01   4.0000000e+02  -8.1246128e-03  -3.1866499e+00  -1.5789246e+00
   2.3930710e+01  -2.1508167e+01   4.0000000e+02  -5.8650620e-03  -3.2835842e+00  -1.3934448e+00
   2.3800234e+01  -2.1465444e+01   4.0000000e+02  -9.4455381e-03  -3.3774036e+00  -1.2031201e+00
   2.3668325e+01  -2.1426825e+01   4.0000000e+02  -1.8004131e-02  -3.4679705e+00  -1.0080751e+00
   2.3535131e+01  -2.1392352e+01   4.0000000e+02  -3.0629813e-02  -3.5550210e+00  -8.0827266e-01
   2.3400797e+01  -2.1362065e+01   4.0000000e+02  -4.6386249e-02  -3.6381436e+00  -6.0354963e-01
   2.3265473e+01  -2.1335996e+01   4.0000000e+02  -6.4336139e-02  -3.7167578e+00  -3.9367772e-01
   2.3129308e+01  -2.1314174e+01   4.0000000e+02  -8.3555910e-02  -3.7901137e+00  -1.7841235e-01
   2.2992451e+01  -2.1296624e+01   4.0000000e+02  -1.0314778e-01  -3.8572975e+00   4.2450424e-02
   2.2855053e+01  -2.1283364e+01   4.0000000e+02  -1.2224811e-01  -3.9172509e+00   2.6901881e-01
   2.2717265e+01  -2.1274410e+01   4.0000000e+02  -1.4002691e-01  -3.9688047e+00   5.0126178e-01
   2.2579239e+01  -2.1269771e+01   4.0000000e+02  -1.5569005e-01  -4.0107219e+00   7.3897224e-01
   2.2441126e+01  -2.1269452e+01   4.0000000e+02  -1.6847511e-01  -4.0417517e+00   9.8174515e-01
   2.2303077e+01  -2.1273454e+01   4.0000000e+02  -1.7764835e-01  -4.0606892e+00   1.2289636e+00
   2.2165245e+01  -2.1281773e+01   4.0000000e+02  -1.8250371e-01  -4.0664386e+00   1.4797948e+00
   2.2027780e+01  -2.1294398e+01   4.0000000e+02  -1.8236587e-01  -4.0580771e+00   1.7332109e+00
   2.1890834e+01  -2.1311317e+01   4.0000000e+02  -1.7658891e-01  -4.0349138e+00   1.9880009e+00
   2.1754557e+01  -2.1332510e+01   4.0000000e+02  -1.6457041e-01  -3.9965395e+00   2.2428077e+00
   2.1619100e+01  -2.1357955e+01   4.0000000e+02  -1.4575730e-01  -3.9428659e+00   2.4961577e+00
   2.1484611e+01  -2.1387622e+01   4.0000000e+02  -1.1966646e-01  -3.8741464e+00   2.7465056e+00
   2.1351239e+01  -2.1421479e+01   4.0000000e+02  -8.5895499e-02  -3.7909820e+00   2.9922641e+00
   2.1219132e+01  -2.1459490e+01   4.0000000e+02  -4.4142675e-02  -3.6943066e+00   3.2318418e+00
   2.1088435e+01  -2.1501611e+01   4.0000000e+02   5.7706357e-03  -3.5853527e+00   3.4636755e+00
   2.0959295e+01  -2.1547796e+01   4.0000000e+02   6.3890547e-02  -3.4656068e+00   3.6862422e+00
   2.0831855e+01  -2.1597994e+01   4.0000000e+02   1.3011437e-01  -3.3367436e+00   3.8980849e+00
   2.0706257e+01  -2.1652149e+01   4.0000000e+02   2.0418212e-01  -3.2005598e+00   4.0978142e+00
   2.0582642e+01  -2.1710202e+01   4.0000000e+02   2.8567649e-01  -3.0589030e+00   4.2841107e+00
   2.0461148e+01  -2.1772087e+01   4.0000000e+02   3.7402157e-01  -2.9136005e+00   4.4557290e+00
   2.0341913e+01  -2.1837736e+01   4.0000000e+02   4.6850056e-01  -2.7664013e+00   4.6114921e+00
   2.0225072e+01  -2.1907076e+01   4.0000000e+02   5.6827001e-01  -2.6189222e+00   4.7502995e+00
   2.0110758e+01  -2.1980030e+01   4.0000000e+02   6.7238555e-01  -2.4726112e+00   4.8711331e+00
   1.9999101e+01  -2.2056517e+01   4.0000000e+02   7.7983122e-01  -2.3287233e+00   4.9730728e+00
   1.9890229e+01  -2.2136450e+01   4.0000000e+02   8.8954894e-01  -2.1883131e+00   5.0553166e+00
   1.9784268e+01  -2.2219741e+01   4.0000000e+02   1.0004784e+00  -2.0522403e+00   5.1172032e+00
   1.9681341e+01  -2.2306297e+01   4.0000000e+02   1.1115821e+00  -1.9211840e+00   5.1582447e+00
   1.9581569e+01  -2.2396020e+01   4.0000000e+02   1.2218714e+00  -1.7956693e+00   5.1781549e+00
   1.9485068e+01  -2.2488810e+01   4.0000000e+02   1.3304301e+00  -1.6760950e+00   5.1768779e+00
   1.9391954e+01  -2.2584563e+01   4.0000000e+02   1.4364222e+00  -1.5627739e+00   5.1546065e+00
   1.9302337e+01  -2.2683170e+01   4.0000000e+02   1.5390933e+00  -1.4559592e+00   5.1118036e+00
   1.9216325e+01  -2.2784521e+01   4.0000000e+02   1.6377683e+00  -1.3558810e+00   5.0491992e+00
   1.9134023e+01  -2.2888502e+01   4.0000000e+02   1.7318339e+00  -1.2627702e+00   4.9677880e+00
   1.9055532e+01  -2.2994993e+01   4.0000000e+02   1.8207178e+00  -1.1768748e+00   4.8688150e+00
   1.8980949e+01  -2.3103875e+01   4.0000000e+02   1.9038729e+00  -1.0984695e+00   4.7537368e+00
   1.8910369e+01  -2.3215024e+01   4.0000000e+02   1.9807502e+00  -1.0278568e+00   4.6241890e+00
   1.8843880e+01  -2.3328314e+01   4.0000000e+02   2.0507807e+00  -9.6535033e-01   4.4819366e+00
   1.8781568e+01  -2.3443614e+01   4.0000000e+02   2.1133609e+00  -9.1126185e-01   4.3288225e+00
   1.8723516e+01  -2.3560794e+01   4.0000000e+02   2.1678499e+00  -8.6587700e-01   4.1667027e+00
   1.8669801e+01  -2.3679719e+01   4.0000000e+02   2.2135666e+00  -8.2942027e-01   3.9974014e+00
   1.8620496e+01  -2.3800252e+01   4.0000000e+02   2.2498029e+00  -8.0202906e-01   3.8226547e+00
   1.8575669e+01  -2.3922254e+01   4.0000000e+02   2.2758430e+00  -7.8372505e-01   3.6440672e+00
   1.8535385e+01  -2.4045585e+01   4.0000000e+02   2.2909919e+00  -7.7439538e-01   3.4630770e+00
   1.8499702e+01  -2.4170102e+01   4.0000000e+02   2.2946064e+00  -7.7377192e-01   3.2809394e+00
   1.8468677e+01  -2.4295659e+01   4.0000000e+02   2.2861354e+00  -7.8143459e-01   3.0987169e+00
   1.8442357e+01  -2.4422112e+01   4.0000000e+02   2.2651553e+00  -7.9680596e-01   2.9172809e+00
   1.8420789e+01  -2.4549313e+01   4.0000000e+02   2.2314097e+00  -8.1917767e-01   2.7373320e+00
   1.8404011e+01  -2.4677111e+01   4.0000000e+02   2.1848393e+00  -8.4772217e-01   2.5594294e+00
   1.8392057e+01  -2.4805359e+01   4.0000000e+02   2.1256048e+00  -8.8153297e-01   2.3840079e+00
   1.8384957e+01  -2.4933903e+01   4.0000000e+02   2.0541037e+00  -9.1965495e-01   2.2114277e+00
   1.8382734e+01  -2.5062593e+01   4.0000000e+02   1.9709650e+00  -9.6112084e-01   2.0419926e+00
   1.8385406e+01  -2.5191276e+01   4.0000000e+02   1.8770387e+00  -1.0049857e+00   1.8759875e+00
   1.8392985e+01  -2.5319800e+01   4.0000000e+02   1.7733651e+00  -1.0503575e+00   1.7136958e+00
   1.8405478e+01  -2.5448010e+01   4.0000000e+02   1.6611374e+00  -1.0964201e+00   1.5554189e+00
   1.8422886e+01  -2.5575753e+01   4.0000000e+02   1.5416459e+00  -1.1424495e+00   1.4014779e+00
   1.8445204e+01  -2.5702876e+01   4.0000000e+02   1.4162214e+00  -1.1878185e+00   1.2522161e+00
   1.8472420e+01  -2.5829227e+01   4.0000000e+02   1.2861730e+00  -1.2319932e+00   1.1079931e+00
   1.8504519e+01  -2.5954652e+01   4.0000000e+02   1.1527332e+00  -1.2745254e+00   9.6917221e-01
   1.8541475e+01  -2.6078999e+01   4.0000000e+02   1.0170017e+00  -1.3150275e+00   8.3611038e-01
   1.8583262e+01  -2.6202117e+01   4.0000000e+02   8.7990579e-01  -1.3531624e+00   7.0913323e-01
   1.8629842e+01  -2.6323855e+01   4.0000000e+02   7.4217474e-01  -1.3886082e+00   5.8853334e-01
   1.8681175e+01  -2.6444066e+01   4.0000000e+02   6.0432569e-01  -1.4210480e+00   4.7454544e-01
   1.8737212e+01  -2.6562600e+01   4.0000000e+02   4.6667868e-01  -1.4501467e+00   3.6734824e-01
   1.8797900e+01  -2.6679312e+01   4.0000000e+02   3.2937106e-01  -1.4755458e+00   2.6704928e-01
   1.8863178e+01  -2.6794057e+01   4.0000000e+02   1.9240121e-01  -1.4968581e+00   1.7368976e-01
   1.8932980e+01  -2.6906693e+01   4.0000000e+02   5.5673000e-02  -1.5136759e+00   8.7241787e-02
   1.9007232e+01  -2.7017079e+01   4.0000000e+02  -8.0947090e-02  -1.5255828e+00   7.6164513e-03
   1.9085856e+01  -2.7125079e+01   4.0000000e+02  -2.1758002e-01  -1.5321742e+00  -6.5333654e-02
   1.9168766e+01  -2.7230555e+01   4.0000000e+02  -3.5427473e-01  -1.5330797e+00  -1.3180204e-01
   1.9255870e+01  -2.7333376e+01   4.0000000e+02  -4.9097535e-01  -1.5279835e+00  -1.9201902e-01
   1.9347071e+01  -2.7433411e+01   4.0000000e+02  -6.2748446e-01  -1.5166483e+00  -2.4624274e-01
   1.9442266e+01  -2.7530535e+01   4.0000000e+02  -7.6345296e-01  -1.4989262e+00  -2.9474276e-01
   1.9541343e+01  -2.7624624e+01   4.0000000e+02  -8.9837344e-01  -1.4747687e+00  -3.3778460e-01
   1.9644189e+01  -2.7715557e+01   4.0000000e+02  -1.0316001e+00  -1.4442270e+00  -3.7562207e-01
   1.9750682e+01  -2.7803219e+01   4.0000000e+02  -1.1623744e+00  -1.4074393e+00  -4.0846861e-01
   1.9860694e+01  -2.7887498e+01   4.0000000e+02  -1.2898585e+00  -1.3646164e+00  -4.3648465e-01
   1.9974094e+01  -2.7968285e+01   4.0000000e+02  -1.4131781e+00  -1.3160200e+00  -4.5976291e-01
   2.0090744e+01  -2.8045476e+01   4.0000000e+02  -1.5314629e+00  -1.2619356e+00  -4.7830569e-01
   2.0210501e+01  -2.8118972e+01   4.0000000e+02  -1.6438862e+00  -1.2026481e+00  -4.9201280e-01
   2.0333216e+01  -2.8188677e+01   4.0000000e+02  -1.7496948e+00  -1.1384204e+00  -5.0067401e-01
   2.0458737e+01  -2.8254501e+01   4.0000000e+02  -1.8482377e+00  -1.0694755e+00  -5.0396466e-01
   2.0586908e+01  -2.8316358e+01   4.0000000e+02  -1.9389788e+00  -9.9598839e-01  -5.0145094e-01
   2.0717566e+01  -2.8374168e+01   4.0000000e+02  -2.0215042e+00  -9.1808751e-01  -4.9259691e-01
   2.0850545e+01  -2.8427855e+01   4.0000000e+02  -2.0955225e+00  -8.3586447e-01  -4.7678980e-01
   2.0985676e+01  -2.8477349e+01   4.0000000e+02  -2.1608595e+00  -7.4939260e-01  -4.5336319e-01
   2.1122786e+01  -2.8522585e+01   4.0000000e+02  -2.2174486e+00  -6.5875503e-01  -4.2163018e-01
   2.1261698e+01  -2.8563504e+01   4.0000000e+02  -2.2653209e+00  -5.6407755e-01  -3.8091877e-01
   2.1402232e+01  -2.8600051e+01   4.0000000e+02  -2.3045961e+00  -4.6556469e-01  -3.3061529e-01
   2.1544205e+01  -2.8632180e+01   4.0000000e+02  -2.3354766e+00  -3.6353428e-01  -2.7019654e-01
   2.1687434e+01  -2.8659846e+01   4.0000000e+02  -2.3582422e+00  -2.5844905e-01  -1.9928337e-01
   2.1831730e+01  -2.8683015e+01   4.0000000e+02  -2.3732497e+00  -1.5094322e-01  -1.1766206e-01
   2.1976905e+01  -2.8701654e+01   4.0000000e+02  -2.3809334e+00  -4.1832705e-02  -2.5335346e-02
   2.2122768e+01  -2.8715741e+01   4.0000000e+02  -2.3818075e+00   6.7883375e-02   7.7465444e-02
   2.2871159e+01  -2.8845191e+01   4.0000000e+02  -2.2645444e+00   5.6079812e-01   9.3469153e-01
   2.3016710e+01  -2.8831814e+01   4.0000000e+02  -2.2346101e+00   6.4198321e-01   1.0758546e+00
   2.3161629e+01  -2.8814061e+01   4.0000000e+02  -2.2035336e+00   7.1513293e-01   1.2189571e+00
   2.3305737e+01  -2.8791954e+01   4.0000000e+02  -2.1721994e+00   7.7936363e-01   1.3621975e+00
   2.3448861e+01  -2.8765519e+01   4.0000000e+02  -2.1414550e+00   8.3403556e-01   1.5037442e+00
   2.3590824e+01  -2.8734790e+01   4.0000000e+02  -2.1120878e+00   8.7877129e-01   1.6417862e+00
   2.3731456e+01  -2.8699805e+01   4.0000000e+02  -2.0848026e+00   9.1346799e-01   1.7745954e+00
   2.3870586e+01  -2.8660605e+01   4.0000000e+02  -2.0602075e+00   9.3828729e-01   1.9005634e+00
   2.4008046e+01  -2.8617239e+01   4.0000000e+02  -2.0387993e+00   9.5363254e-01   2.0182504e+00
   2.4143671e+01  -2.8569760e+01   4.0000000e+02  -2.0209603e+00   9.6011711e-01   2.1264070e+00
   2.4277300e+01  -2.8518226e+01   4.0000000e+02  -2.0069578e+00   9.5852342e-01   2.2239923e+00
   2.4408774e+01  -2.8462700e+01   4.0000000e+02  -1.9969508e+00   9.4975896e-01   2.3101749e+00
   2.4537936e+01  -2.8403249e+01   4.0000000e+02  -1.9910008e+00   9.3481274e-01   2.3843277e+00
   2.4664636e+01  -2.8339946e+01   4.0000000e+02  -1.9890822e+00   9.1471089e-01   2.4460228e+00
   2.4788725e+01  -2.8272867e+01   4.0000000e+02  -1.9911015e+00   8.9048172e-01   2.4950048e+00
   2.4910059e+01  -2.8202094e+01   4.0000000e+02  -1.9969110e+00   8.6312119e-01   2.5311789e+00
   2.5028498e+01  -2.8127711e+01   4.0000000e+02  -2.0063276e+00   8.3356839e-01   2.5545842e+00
   2.5143907e+01  -2.8049808e+01   4.0000000e+02  -2.0191451e+00   8.0268307e-01   2.5653789e+00
   2.5256155e+01  -2.7968479e+01   4.0000000e+02  -2.0351491e+00   7.7123161e-01   2.5638179e+00
   2.5365115e+01  -2.7883822e+01   4.0000000e+02  -2.0541276e+00   7.3987657e-01   2.5502335e+00
   2.5470667e+01  -2.7795936e+01   4.0000000e+02  -2.0758778e+00   7.0916952e-01   2.5250169e+00
   2.5572694e+01  -2.7704927e+01   4.0000000e+02  -2.1002073e+00   6.7954827e-01   2.4886040e+00
   2.5671085e+01  -2.7610903e+01   4.0000000e+02  -2.1269333e+00   6.5133734e-01   2.4414552e+00
   2.5765733e+01  -2.7513975e+01   4.0000000e+02  -2.1558769e+00   6.2475246e-01   2.3840379e+00
   2.5856538e+01  -2.7414257e+01   4.0000000e+02  -2.1868508e+00   5.9990555e-01   2.3168134e+00
   2.5943405e+01  -2.7311868e+01   4.0000000e+02  -2.2196451e+00   5.7681521e-01   2.2402252e+00
   2.6026242e+01  -2.7206926e+01   4.0000000e+02  -2.2540151e+00   5.5542235e-01   2.1546802e+00
   2.6104966e+01  -2.7099554e+01   4.0000000e+02  -2.2896599e+00   5.3559951e-01   2.0605553e+00
   2.6179498e+01  -2.6989879e+01   4.0000000e+02  -2.3262108e+00   5.1717042e-01   1.9581937e+00
   2.6249764e+01  -2.6878026e+01   4.0000000e+02  -2.3632238e+00   4.9992709e-01   1.8479028e+00
   2.6315695e+01  -2.6764125e+01   4.0000000e+02  -2.4001730e+00   4.8364317e-01   1.7299752e+00
   2.6377231e+01  -2.6648309e+01   4.0000000e+02  -2.4364547e+00   4.6808523e-01   1.6047022e+00
   2.6434314e+01  -2.6530709e+01   4.0000000e+02  -2.4714028e+00   4.5302728e-01   1.4723788e+00
   2.6486893e+01  -2.6411461e+01   4.0000000e+02  -2.5043050e+00   4.3825232e-01   1.3333311e+00
   2.6534923e+01  -2.6290702e+01   4.0000000e+02  -2.5344300e+00   4.2355518e-01   1.1879231e+00
   2.6578363e+01  -2.6168567e+01   4.0000000e+02  -2.5610583e+00   4.0874113e-01   1.0365583e+00
   2.6617180e+01  -2.6045196e+01   4.0000000e+02  -2.5835101e+00   3.9361725e-01   8.7969463e-01
   2.6651344e+01  -2.5920729e+01   4.0000000e+02  -2.6011758e+00   3.7798700e-01   7.1783005e-01
   2.6680833e+01  -2.5795305e+01   4.0000000e+02  -2.6135392e+00   3.6163772e-01   5.5149568e-01
   2.6705628e+01  -2.5669065e+01   4.0000000e+02  -2.6201943e+00   3.4433289e-01   3.8124403e-01
   2.6725717e+01  -2.5542152e+01   4.0000000e+02  -2.6208528e+00   3.2580143e-01   2.0763799e-01
   2.6741092e+01  -2.5414705e+01   4.0000000e+02  -2.6153435e+00   3.0573156e-01   3.1226167e-02
   2.6751752e+01  -2.5286867e+01   4.0000000e+02  -2.6036021e+00   2.8376637e-01  -1.4745289e-01
   2.6757700e+01  -2.5158780e+01   4.0000000e+02  -2.5856539e+00   2.5950439e-01  -3.2788558e-01
   2.6758944e+01  -2.5030584e+01   4.0000000e+02  -2.5615904e+00   2.3250266e-01  -5.0958208e-01
   2.6755498e+01  -2.4902422e+01   4.0000000e+02  -2.5315455e+00   2.0228555e-01  -6.9205932e-01
   2.6747379e+01  -2.4774434e+01   4.0000000e+02  -2.4956683e+00   1.6835628e-01  -8.7483583e-01
   2.6734612e+01  -2.4646759e+01   4.0000000e+02  -2.4541034e+00   1.3021167e-01  -1.0574026e+00
   2.6717224e+01  -2.4519538e+01   4.0000000e+02  -2.4069743e+00   8.7362514e-02  -1.2391981e+00
   2.6695248e+01  -2.4392908e+01   4.0000000e+02  -2.3543746e+00   3.9350885e-02  -1.4195867e+00
   2.6668722e+01  -2.4267007e+01   4.0000000e+02  -2.2963705e+00  -1.4227602e-02  -1.5978279e+00
   2.6637687e+01  -2.4141970e+01   4.0000000e+02  -2.2330070e+00  -7.3705839e-02  -1.7730653e+00
   2.6602190e+01  -2.4017934e+01   4.0000000e+02  -2.1643276e+00  -1.3932589e-01  -1.9443075e+00
   2.6562281e+01  -2.3895031e+01   4.0000000e+02  -2.0903910e+00  -2.1122887e-01  -2.1104397e+00
   2.6518015e+01  -2.3773393e+01   4.0000000e+02  -2.0112974e+00  -2.8944383e-01  -2.2702275e+00
   2.6469452e+01  -2.3653150e+01   4.0000000e+02  -1.9272096e+00  -3.7388527e-01  -2.4223429e+00
   2.6416655e+01  -2.3534430e+01   4.0000000e+02  -1.8383715e+00  -4.6435588e-01  -2.5653963e+00
   2.6359690e+01  -2.3417361e+01   4.0000000e+02  -1.7451218e+00  -5.6055300e-01  -2.6979735e+00
   2.6298630e+01  -2.3302065e+01   4.0000000e+02  -1.6479008e+00  -6.6208350e-01  -2.8186803e+00
   2.6233547e+01  -2.3188666e+01   4.0000000e+02  -1.5472509e+00  -7.6847588e-01  -2.9261811e+00
   2.6164521e+01  -2.3077283e+01   4.0000000e+02  -1.4438132e+00  -8.7919877e-01  -3.0192413e+00
   2.6091634e+01  -2.2968034e+01   4.0000000e+02  -1.3383175e+00  -9.9367673e-01  -3.0967611e+00
   2.6014971e+01  -2.2861034e+01   4.0000000e+02  -1.2315692e+00  -1.1113069e+00  -3.1578078e+00
   2.5934621e+01  -2.2756394e+01   4.0000000e+02  -1.1244359e+00  -1.2314727e+00  -3.2016394e+00
   2.5850676e+01  -2.2654226e+01   4.0000000e+02  -1.0178343e+00  -1.3535515e+00  -3.2277225e+00
   2.5763230e+01  -2.2554635e+01   4.0000000e+02  -9.1271039e-01  -1.4769299e+00  -3.2357478e+00
   2.5672383e+01  -2.2457726e+01   4.0000000e+02  -8.1002874e-01  -1.6010033e+00  -3.2256376e+00
   2.5578234e+01  -2.2363601e+01   4.0000000e+02  -7.1074969e-01  -1.7251890e+00  -3.1975474e+00
   2.5480888e+01  -2.2272356e+01   4.0000000e+02  -6.1581401e-01  -1.8489301e+00  -3.1518649e+00
   2.5380451e+01  -2.2184087e+01   4.0000000e+02  -5.2612228e-01  -1.9717017e+00  -3.0891990e+00
   2.5277033e+01  -2.2098885e+01   4.0000000e+02  -4.4251314e-01  -2.0930213e+00  -3.0103642e+00
   2.5170746e+01  -2.2016839e+01   4.0000000e+02  -3.6574092e-01  -2.2124572e+00  -2.9163559e+00
   2.5061703e+01  -2.1938034e+01   4.0000000e+02  -2.9645219e-01  -2.3296407e+00  -2.8083173e+00
   2.4950021e+01  -2.1862551e+01   4.0000000e+02  -2.3516621e-01  -2.4442731e+00  -2.6875021e+00
   2.4835818e+01  -2.1790468e+01   4.0000000e+02  -1.8225533e-01  -2.5561346e+00  -2.5552263e+00
   2.4719216e+01  -2.1721859e+01   4.0000000e+02  -1.3793171e-01  -2.6650861e+00  -2.4128207e+00
   2.4600336e+01  -2.1656796e+01   4.0000000e+02  -1.0223694e-01  -2.7710704e+00  -2.2615743e+00
   2.4479304e+01  -2.1595345e+01   4.0000000e+02  -7.5041636e-02  -2.8741007e+00  -2.1026880e+00
   2.4356246e+01  -2.1537569e+01   4.0000000e+02  -5.6049075e-02  -2.9742484e+00  -1.9372241e+00
   2.4231289e+01  -2.1483527e+01   4.0000000e+02  -4.4807666e-02  -3.0716196e+00  -1.7660686e+00
   2.4104564e+01  -2.1433276e+01   4.0000000e+02  -4.0729154e-02  -3.1663245e+00  -1.5899082e+00
   2.3976201e+01  -2.1386867e+01   4.0000000e+02  -4.3111648e-02  -3.2584485e+00  -1.4092099e+00
   2.3846332e+01  -2.1344346e+01   4.0000000e+02  -5.1166718e-02  -3.3480143e+00  -1.2242259e+00
   2.3715091e+01  -2.1305759e+01   4.0000000e+02  -6.4045199e-02  -3.4349474e+00  -1.0350113e+00
   2.3582613e+01  -2.1271144e+01   4.0000000e+02  -8.0866078e-02  -3.5190456e+00  -8.4145083e-01
   2.3449032e+01  -2.1240537e+01   4.0000000e+02  -1.0073875e-01  -3.5999557e+00  -6.4329854e-01
   2.3314487e+01  -2.1213968e+01   4.0000000e+02  -1.2278398e-01  -3.6771526e+00  -4.4023527e-01
   2.3179113e+01  -2.1191466e+01   4.0000000e+02  -1.4614684e-01  -3.7499395e+00  -2.3191131e-01
   2.3043048e+01  -2.1173053e+01   4.0000000e+02  -1.7000827e-01  -3.8174484e+00  -1.8010593e-02
   2.2906432e+01  -2.1158749e+01   4.0000000e+02  -1.9358673e-01  -3.8786589e+00   2.0169649e-01
   2.2769404e+01  -2.1148566e+01   4.0000000e+02  -2.1614144e-01  -3.9324279e+00   4.2731143e-01
   2.2632101e+01  -2.1142517e+01   4.0000000e+02  -2.3696373e-01  -3.9775302e+00   6.5877000e-01
   2.2494664e+01  -2.1140607e+01   4.0000000e+02  -2.5537584e-01  -4.0127043e+00   8.9580485e-01
   2.2357233e+01  -2.1142839e+01   4.0000000e+02  -2.7072186e-01  -4.0367102e+00   1.1379364e+00
   2.2219947e+01  -2.1149209e+01   4.0000000e+02  -2.8236585e-01  -4.0483881e+00   1.3844686e+00
   2.2082945e+01  -2.1159712e+01   4.0000000e+02  -2.8968449e-01  -4.0467190e+00   1.6344938e+00
   2.1946367e+01  -2.1174336e+01   4.0000000e+02  -2.9207139e-01  -4.0308819e+00   1.8869092e+00
   2.1810352e+01  -2.1193067e+01   4.0000000e+02  -2.8893718e-01  -4.0003057e+00   2.1404468e+00
   2.1675037e+01  -2.1215886e+01   4.0000000e+02  -2.7971934e-01  -3.9547092e+00   2.3937097e+00
   2.1540561e+01  -2.1242768e+01   4.0000000e+02  -2.6389411e-01  -3.8941306e+00   2.6452026e+00
   2.1407062e+01  -2.1273688e+01   4.0000000e+02  -2.4098528e-01  -3.8189399e+00   2.8933778e+00
   2.1274674e+01  -2.1308613e+01   4.0000000e+02  -2.1058815e-01  -3.7298316e+00   3.1366791e+00
   2.1143535e+01  -2.1347507e+01   4.0000000e+02  -1.7238212e-01  -3.6278082e+00   3.3735612e+00
   2.1013778e+01  -2.1390331e+01   4.0000000e+02  -1.2614847e-01  -3.5141368e+00   3.6025345e+00
   2.0885538e+01  -2.1437040e+01   4.0000000e+02  -7.1789945e-02  -3.3903032e+00   3.8221723e+00
   2.0758945e+01  -2.1487588e+01   4.0000000e+02  -9.3391483e-03  -3.2579455e+00   4.0311350e+00
   2.0634131e+01  -2.1541921e+01   4.0000000e+02   6.1022781e-02  -3.1187948e+00   4.2281628e+00
   2.0511225e+01  -2.1599984e+01   4.0000000e+02   1.3896894e-01  -2.9746050e+00   4.4120824e+00
   2.0390356e+01  -2.1661718e+01   4.0000000e+02   2.2402317e-01  -2.8270946e+00   4.5817975e+00
   2.0271649e+01  -2.1727059e+01   4.0000000e+02   3.1556511e-01  -2.6778881e+00   4.7362901e+00
   2.0155228e+01  -2.1795940e+01   4.0000000e+02   4.1284569e-01  -2.5284776e+00   4.8746121e+00
   2.0041217e+01  -2.1868290e+01   4.0000000e+02   5.1500491e-01  -2.3801942e+00   4.9958869e+00
   1.9929736e+01  -2.1944034e+01   4.0000000e+02   6.2109639e-01  -2.2341862e+00   5.0993211e+00
   1.9820903e+01  -2.2023094e+01   4.0000000e+02   7.3011701e-01  -2.0914179e+00   5.1842151e+00
   1.9714834e+01  -2.2105388e+01   4.0000000e+02   8.4103576e-01  -1.9526764e+00   5.2499824e+00
   1.9611643e+01  -2.2190831e+01   4.0000000e+02   9.5282486e-01  -1.8185891e+00   5.2961720e+00
   1.9511443e+01  -2.2279334e+01   4.0000000e+02   1.0644856e+00  -1.6896482e+00   5.3224924e+00
   1.9414341e+01  -2.2370806e+01   4.0000000e+02   1.1750730e+00  -1.5662333e+00   5.3288389e+00
   1.9320445e+01  -2.2465151e+01   4.0000000e+02   1.2837076e+00  -1.4486512e+00   5.3153101e+00
   1.9229858e+01  -2.2562272e+01   4.0000000e+02   1.3895887e+00  -1.3371587e+00   5.2822254e+00
   1.9142681e+01  -2.2662066e+01   4.0000000e+02   1.4919887e+00  -1.2319944e+00   5.2301356e+00
   1.9059011e+01  -2.2764431e+01   4.0000000e+02   1.5902541e+00  -1.1333999e+00   5.1598172e+00
   1.8978944e+01  -2.2869257e+01   4.0000000e+02   1.6837834e+00  -1.0416398e+00   5.0722713e+00
   1.8902571e+01  -2.2976436e+01   4.0000000e+02   1.7720211e+00  -9.5700701e-01   4.9686968e+00
   1.8829981e+01  -2.3085855e+01   4.0000000e+02   1.8544317e+00  -8.7982669e-01   4.8504694e+00
   1.8761258e+01  -2.3197399e+01   4.0000000e+02   1.9304851e+00  -8.1044487e-01   4.7191057e+00
   1.8696485e+01  -2.3310949e+01   4.0000000e+02   1.9996406e+00  -7.4921838e-01   4.5762232e+00
   1.8635740e+01  -2.3426387e+01   4.0000000e+02   2.0613396e+00  -6.9648868e-01   4.4234903e+00
   1.8579096e+01  -2.3543589e+01   4.0000000e+02   2.1149956e+00  -6.5255358e-01   4.2625905e+00
   1.8526625e+01  -2.3662432e+01   4.0000000e+02   2.1600027e+00  -6.1764681e-01   4.0951650e+00
   1.8478394e+01  -2.3782787e+01   4.0000000e+02   2.1957395e+00  -5.9190224e-01   3.9227841e+00
   1.8434464e+01  -2.3904529e+01   4.0000000e+02   2.2215896e+00  -5.7533161e-01   3.7468973e+00
   1.8394896e+01  -2.4027524e+01   4.0000000e+02   2.2369600e+00  -5.6780979e-01   3.5688242e+00
   1.8359743e+01  -2.4151643e+01   4.0000000e+02   2.2413102e+00  -5.6905755e-01   3.3897202e+00
   1.8329057e+01  -2.4276751e+01   4.0000000e+02   2.2341810e+00  -5.7864517e-01   3.2105847e+00
   1.8302882e+01  -2.4402714e+01   4.0000000e+02   2.2152247e+00  -5.9599239e-01   3.0322576e+00
   1.8281261e+01  -2.4529395e+01   4.0000000e+02   2.1842373e+00  -6.2039266e-01   2.8554359e+00
   1.8264231e+01  -2.4656656e+01   4.0000000e+02   2.1411832e+00  -6.5103069e-01   2.6806924e+00
   1.8251824e+01  -2.4784360e+01   4.0000000e+02   2.0862157e+00  -6.8701433e-01   2.5084979e+00
   1.8244067e+01  -2.4912367e+01   4.0000000e+02   2.0196902e+00  -7.2740621e-01   2.3392521e+00
   1.8240985e+01  -2.5040537e+01   4.0000000e+02   1.9421664e+00  -7.7126333e-01   2.1733026e+00
   1.8242593e+01  -2.5168729e+01   4.0000000e+02   1.8543964e+00  -8.1765892e-01   2.0109734e+00
   1.8248907e+01  -2.5296802e+01   4.0000000e+02   1.7573070e+00  -8.6572619e-01   1.8525724e+00
   1.8259933e+01  -2.5424615e+01   4.0000000e+02   1.6519629e+00  -9.1466696e-01   1.6984109e+00
   1.8275674e+01  -2.5552025e+01   4.0000000e+02   1.5395288e+00  -9.6377564e-01   1.5488052e+00
   1.8296128e+01  -2.5678892e+01   4.0000000e+02   1.4212157e+00  -1.0124449e+00   1.4040732e+00
   1.8321288e+01  -2.5805073e+01   4.0000000e+02   1.2982334e+00  -1.0601630e+00   1.2645348e+00
   1.8351141e+01  -2.5930428e+01   4.0000000e+02   1.1717328e+00  -1.1065041e+00   1.1304993e+00
   1.8385667e+01  -2.6054815e+01   4.0000000e+02   1.0427629e+00  -1.1511112e+00   1.0022606e+00
   1.8424844e+01  -2.6178095e+01   4.0000000e+02   9.1222615e-01  -1.1936819e+00   8.8007825e-01
   1.8468642e+01  -2.6300127e+01   4.0000000e+02   7.8085454e-01  -1.2339392e+00   7.6417683e-01
   1.8517026e+01  -2.6420775e+01   4.0000000e+02   6.4918705e-01  -1.2716131e+00   6.5473097e-01
   1.8569957e+01  -2.6539900e+01   4.0000000e+02   5.1757738e-01  -1.3064237e+00   5.5186387e-01
   1.8627387e+01  -2.6657366e+01   4.0000000e+02   3.8620238e-01  -1.3380625e+00   4.5564606e-01
   1.8689266e+01  -2.6773038e+01   4.0000000e+02   2.5509094e-01  -1.3661931e+00   3.6608960e-01
   1.8755537e+01  -2.6886784e+01   4.0000000e+02   1.2416138e-01  -1.3904474e+00   2.8315494e-01
   1.8826136e+01  -2.6998473e+01   4.0000000e+02  -6.7296064e-03  -1.4104347e+00   2.0675542e-01
   1.8900996e+01  -2.7107974e+01   4.0000000e+02  -1.3773692e-01  -1.4257605e+00   1.3675741e-01
   1.8980042e+01  -2.7215161e+01   4.0000000e+02  -2.6898116e-01  -1.4360411e+00   7.2991184e-02
   1.9063196e+01  -2.7319909e+01   4.0000000e+02  -4.0050173e-01  -1.4409302e+00   1.5251368e-02
   1.9150371e+01  -2.7422096e+01   4.0000000e+02  -5.3222109e-01  -1.4401359e+00  -3.6690406e-02
   1.9241478e+01  -2.7521601e+01   4.0000000e+02  -6.6392154e-01  -1.4334448e+00  -8.3087329e-02
   1.9336421e+01  -2.7618308e+01   4.0000000e+02  -7.9523665e-01  -1.4207300e+00  -1.2420263e-01
   1.9435097e+01  -2.7712102e+01   4.0000000e+02  -9.2565064e-01  -1.4019606e+00  -1.6030248e-01
   1.9537402e+01  -2.7802872e+01   4.0000000e+02  -1.0545202e+00  -1.3771998e+00  -1.9164945e-01
   1.9643223e+01  -2.7890511e+01   4.0000000e+02  -1.1810973e+00  -1.3465935e+00  -2.1848049e-01
   1.9752443e+01  -2.7974914e+01   4.0000000e+02  -1.3045646e+00  -1.3103561e+00  -2.4099854e-01
   1.9864941e+01  -2.8055980e+01   4.0000000e+02  -1.4240753e+00  -1.2687479e+00  -2.5935427e-01
   1.9980590e+01  -2.8133613e+01   4.0000000e+02  -1.5387917e+00  -1.2220502e+00  -2.7362588e-01
   2.0099259e+01  -2.8207718e+01   4.0000000e+02  -1.6479185e+00  -1.1705425e+00  -2.8381010e-01
   2.0220812e+01  -2.8278208e+01   4.0000000e+02  -1.7507371e+00  -1.1144775e+00  -2.8980028e-01
   2.0345108e+01  -2.8344997e+01   4.0000000e+02  -1.8466223e+00  -1.0540673e+00  -2.9138703e-01
   2.0472005e+01  -2.8408004e+01   4.0000000e+02  -1.9350608e+00  -9.8947036e-01  -2.8825419e-01
   2.0601352e+01  -2.8467152e+01   4.0000000e+02  -2.0156519e+00  -9.2079170e-01  -2.7997898e-01
   2.0732999e+01  -2.8522371e+01   4.0000000e+02  -2.0881114e+00  -8.4808565e-01  -2.6604616e-01
   2.0866788e+01  -2.8573592e+01   4.0000000e+02  -2.1522583e+00  -7.7137636e-01  -2.4587028e-01
   2.1002562e+01  -2.8620753e+01   4.0000000e+02  -2.2080107e+00  -6.9067451e-01  -2.1881612e-01
   2.1140158e+01  -2.8663798e+01   4.0000000e+02  -2.2553714e+00  -6.0600965e-01  -1.8422588e-01
   2.1279410e+01  -2.8702672e+01   4.0000000e+02  -2.2944177e+00  -5.1746356e-01  -1.4146305e-01
   2.1420151e+01  -2.8737329e+01   4.0000000e+02  -2.3252959e+00  -4.2520114e-01  -8.9934277e-02
   2.1562211e+01  -2.8767726e+01   4.0000000e+02  -2.3482154e+00  -3.2950650e-01  -2.9135580e-02
   2.1705417e+01  -2.8793825e+01   4.0000000e+02  -2.3634483e+00  -2.3081125e-01   4.1314503e-02
   2.1849595e+01  -2.8815595e+01   4.0000000e+02  -2.3713320e+00  -1.2971447e-01   1.2164390e-01
   2.1994569e+01  -2.8833009e+01   4.0000000e+02  -2.3722732e+00  -2.6994516e-02   2.1188982e-01
   2.2140162e+01  -2.8846046e+01   4.0000000e+02  -2.3667534e+00   7.6393767e-02   3.1187517e-01
   2.2286196e+01  -2.8854688e+01   4.0000000e+02  -2.3553328e+00   1.7933548e-01   4.2118249e-01
   2.2432492e+01  -2.8858927e+01   4.0000000e+02  -2.3386511e+00   2.8058584e-01   5.3915305e-01
   2.2578871e+01  -2.8858755e+01   4.0000000e+02  -2.3174259e+00   3.7881551e-01   6.6486788e-01
   2.2725153e+01  -2.8854175e+01   4.0000000e+02  -2.2924428e+00   4.7266297e-01   7.9717413e-01
   2.3482750e+01  -2.8890663e+01   4.0000000e+02  -2.0681063e+00   7.9723883e-01   1.7085458e+00
   2.3625094e+01  -2.8859884e+01   4.0000000e+02  -2.0346517e+00   8.3779171e-01   1.8420831e+00
   2.3766142e+01  -2.8824969e+01   4.0000000e+02  -2.0035529e+00   8.6860464e-01   1.9706969e+00
   2.3905735e+01  -2.8785956e+01   4.0000000e+02  -1.9754288e+00   8.8983234e-01   2.0928503e+00
   2.4043712e+01  -2.8742890e+01   4.0000000e+02  -1.9507875e+00   9.0186204e-01   2.2071566e+00
   2.4179920e+01  -2.8695823e+01   4.0000000e+02  -1.9300166e+00   9.0528249e-01   2.3124174e+00
   2.4314203e+01  -2.8644807e+01   4.0000000e+02  -1.9133917e+00   9.0084944e-01   2.4076183e+00
   2.4446412e+01  -2.8589902e+01   4.0000000e+02  -1.9010732e+00   8.8943991e-01   2.4919549e+00
   2.4576399e+01  -2.8531171e+01   4.0000000e+02  -1.8931215e+00   8.7201319e-01   2.5648173e+00
   2.4704021e+01  -2.8468680e+01   4.0000000e+02  -1.8895094e+00   8.4957027e-01   2.6257835e+00
   2.4829135e+01  -2.8402501e+01   4.0000000e+02  -1.8901370e+00   8.2311878e-01   2.6746027e+00
   2.4951607e+01  -2.8332709e+01   4.0000000e+02  -1.8948475e+00   7.9364016e-01   2.7111821e+00
   2.5071302e+01  -2.8259385e+01   4.0000000e+02  -1.9034461e+00   7.6206759e-01   2.7355614e+00
   2.5188091e+01  -2.8182611e+01   4.0000000e+02  -1.9157162e+00   7.2926529e-01   2.7478953e+00
   2.5301850e+01  -2.8102474e+01   4.0000000e+02  -1.9314326e+00   6.9601214e-01   2.7484370e+00
   2.5412458e+01  -2.8019064e+01   4.0000000e+02  -1.9503742e+00   6.6299266e-01   2.7375175e+00
   2.5519799e+01  -2.7932477e+01   4.0000000e+02  -1.9723310e+00   6.3078732e-01   2.7155323e+00
   2.5623761e+01  -2.7842807e+01   4.0000000e+02  -1.9971142e+00   5.9987160e-01   2.6829148e+00
   2.5724237e+01  -2.7750157e+01   4.0000000e+02  -2.0245489e+00   5.7060956e-01   2.6401312e+00
   2.5821125e+01  -2.7654630e+01   4.0000000e+02  -2.0544757e+00   5.4325821e-01   2.5876530e+00
   2.5914327e+01  -2.7556331e+01   4.0000000e+02  -2.0867410e+00   5.1797131e-01   2.5259405e+00
   2.6003751e+01  -2.7455370e+01   4.0000000e+02  -2.1211809e+00   4.9480393e-01   2.4554324e+00
   2.6089309e+01  -2.7351859e+01   4.0000000e+02  -2.1576073e+00   4.7372483e-01   2.3765271e+00
   2.6170918e+01  -2.7245912e+01   4.0000000e+02  -2.1957901e+00   4.5462847e-01   2.2895751e+00
   2.6248502e+01  -2.7137645e+01   4.0000000e+02  -2.2354382e+00   4.3734856e-01   2.1948758e+00
   2.6321987e+01  -2.7027176e+01   4.0000000e+02  -2.2761868e+00   4.2167728e-01   2.0926781e+00
   2.6391306e+01  -2.6914627e+01   4.0000000e+02  -2.3175847e+00   4.0737780e-01   1.9831945e+00
   2.6456397e+01  -2.6800120e+01   4.0000000e+02  -2.3590939e+00   3.9420159e-01   1.8666092e+00
   2.6517203e+01  -2.6683778e+01   4.0000000e+02  -2.4000944e+00   3.8190062e-01   1.7430974e+00
   2.6573672e+01  -2.6565729e+01   4.0000000e+02  -2.4398962e+00   3.7023580e-01   1.6128506e+00
   2.6625757e+01  -2.6446098e+01   4.0000000e+02  -2.4777642e+00   3.5898382e-01   1.4760837e+00
   2.6673417e+01  -2.6325015e+01   4.0000000e+02  -2.5129425e+00   3.4793616e-01   1.3330626e+00
   2.6716615e+01  -2.6202608e+01   4.0000000e+02  -2.5446894e+00   3.3689845e-01   1.1841027e+00
   2.6755319e+01  -2.6079009e+01   4.0000000e+02  -2.5723069e+00   3.2568291e-01   1.0295818e+00
   2.6789504e+01  -2.5954348e+01   4.0000000e+02  -2.5951732e+00   3.1409934e-01   8.6992970e-01
   2.6819147e+01  -2.5828758e+01   4.0000000e+02  -2.6127662e+00   3.0194717e-01   7.0562311e-01
   2.6844232e+01  -2.5702371e+01   4.0000000e+02  -2.6246817e+00   2.8900302e-01   5.3716986e-01
   2.6864748e+01  -2.5575320e+01   4.0000000e+02  -2.6306411e+00   2.7501233e-01   3.6509455e-01
   2.6880688e+01  -2.5447738e+01   4.0000000e+02  -2.6304898e+00   2.5968239e-01   1.8992064e-01
   2.6892049e+01  -2.5319759e+01   4.0000000e+02  -2.6241866e+00   2.4267769e-01   1.2158603e-02
   2.6898836e+01  -2.5191515e+01   4.0000000e+02  -2.6117839e+00   2.2361719e-01  -1.6770373e-01
   2.6901055e+01  -2.5063141e+01   4.0000000e+02  -2.5934031e+00   2.0207982e-01  -3.4920131e-01
   2.6898718e+01  -2.4934768e+01   4.0000000e+02  -2.5692055e+00   1.7760828e-01  -5.3189253e-01
   2.6891843e+01  -2.4806529e+01   4.0000000e+02  -2.5393643e+00   1.4972039e-01  -7.1533749e-01
   2.6880449e+01  -2.4678557e+01   4.0000000e+02  -2.5040388e+00   1.1792365e-01  -8.9908505e-01
   2.6864563e+01  -2.4550981e+01   4.0000000e+02  -2.4633541e+00   8.1728992e-02  -1.0826480e+00
   2.6844215e+01  -2.4423934e+01   4.0000000e+02  -2.4173914e+00   4.0672407e-02  -1.2654690e+00
   2.6819438e+01  -2.4297543e+01   4.0000000e+02  -2.3661820e+00  -5.6690725e-03  -1.4469080e+00
   2.6790271e+01  -2.4171938e+01   4.0000000e+02  -2.3097188e+00  -5.7655792e-02  -1.6262054e+00
   2.6756755e+01  -2.4047245e+01   4.0000000e+02  -2.2479684e+00  -1.1557042e-01  -1.8024798e+00
   2.6718937e+01  -2.3923592e+01   4.0000000e+02  -2.1808973e+00  -1.7960102e-01  -1.9747118e+00
   2.6676867e+01  -2.3801102e+01   4.0000000e+02  -2.1084946e+00  -2.4983370e-01  -2.1417608e+00
   2.6630600e+01  -2.3679898e+01   4.0000000e+02  -2.0308020e+00  -3.2624452e-01  -2.3023739e+00
   2.6580191e+01  -2.3560103e+01   4.0000000e+02  -1.9479360e+00  -4.0869963e-01  -2.4552164e+00
   2.6525703e+01  -2.3441835e+01   4.0000000e+02  -1.8601097e+00  -4.9696198e-01  -2.5989059e+00
   2.6467201e+01  -2.3325214e+01   4.0000000e+02  -1.7676461e+00  -5.9069741e-01  -2.7320486e+00
   2.6404752e+01  -2.3210354e+01   4.0000000e+02  -1.6709807e+00  -6.8949335e-01  -2.8532869e+00
   2.6338428e+01  -2.3097370e+01   4.0000000e+02  -1.5706653e+00  -7.9286892e-01  -2.9613310e+00
   2.6268304e+01  -2.2986375e+01   4.0000000e+02  -1.4673592e+00  -9.0029353e-01  -3.0549989e+00
   2.6194458e+01  -2.2877477e+01   4.0000000e+02  -1.3618162e+00  -1.0112048e+00  -3.1332493e+00
   2.6116972e+01  -2.2770784e+01   4.0000000e+02  -1.2548739e+00  -1.1250182e+00  -3.1952032e+00
   2.6035928e+01  -2.2666402e+01   4.0000000e+02  -1.1474342e+00  -1.2411422e+00  -3.2401670e+00
   2.5951415e+01  -2.2564433e+01   4.0000000e+02  -1.0404501e+00  -1.3589848e+00  -3.2676472e+00
   2.5863521e+01  -2.2464976e+01   4.0000000e+02  -9.3490407e-01  -1.4779639e+00  -3.2773617e+00
   2.5772340e+01  -2.2368131e+01   4.0000000e+02  -8.3179645e-01  -1.5975059e+00  -3.2692456e+00
   2.5677967e+01  -2.2273990e+01   4.0000000e+02  -7.3211961e-01  -1.7170599e+00  -3.2434559e+00
   2.5580500e+01  -2.2182646e+01   4.0000000e+02  -6.3684401e-01  -1.8360956e+00  -3.2003679e+00
   2.5480038e+01  -2.2094189e+01   4.0000000e+02  -5.4689437e-01  -1.9541146e+00  -3.1405683e+00
   2.5376684e+01  -2.2008704e+01   4.0000000e+02  -4.6312905e-01  -2.0706575e+00  -3.0648429e+00
   2.5270544e+01  -2.1926274e+01   4.0000000e+02  -3.8631834e-01  -2.1853129e+00  -2.9741567e+00
   2.5161723e+01  -2.1846979e+01   4.0000000e+02  -3.1712042e-01  -2.2977315e+00  -2.8696228e+00
   2.5050331e+01  -2.1770896e+01   4.0000000e+02  -2.5606369e-01  -2.4076325e+00  -2.7524718e+00
   2.4936480e+01  -2.1698100e+01   4.0000000e+02  -2.0352773e-01  -2.5148142e+00  -2.6240084e+00
   2.4820282e+01  -2.1628659e+01   4.0000000e+02  -1.5972850e-01  -2.6191628e+00  -2.4855604e+00
   2.4701851e+01  -2.1562642e+01   4.0000000e+02  -1.2471273e-01  -2.7206481e+00  -2.3384323e+00
   2.4581305e+01  -2.1500112e+01   4.0000000e+02  -9.8355648e-02  -2.8193189e+00  -2.1838542e+00
   2.4458761e+01  -2.1441130e+01   4.0000000e+02  -8.0365817e-02  -2.9152915e+00  -2.0229303e+00
   2.4334339e+01  -2.1385751e+01   4.0000000e+02  -7.0298646e-02  -3.0087274e+00  -1.8565994e+00
   2.4208160e+01  -2.1334030e+01   4.0000000e+02  -6.7574310e-02  -3.0998062e+00  -1.6856035e+00
   2.4080347e+01  -2.1286017e+01   4.0000000e+02  -7.1501737e-02  -3.1886935e+00  -1.5104666e+00
   2.3951023e+01  -2.1241756e+01   4.0000000e+02  -8.1306095e-02  -3.2755061e+00  -1.3314869e+00
   2.3820312e+01  -2.1201292e+01   4.0000000e+02  -9.6155531e-02  -3.3602755e+00  -1.1487483e+00
   2.3688341e+01  -2.1164662e+01   4.0000000e+02  -1.1519059e-01  -3.4429130e+00  -9.6214405e-01
   2.3555235e+01  -2.1131903e+01   4.0000000e+02  -1.3754694e-01  -3.5231846e+00  -7.7140739e-01
   2.3421124e+01  -2.1103045e+01   4.0000000e+02  -1.6237775e-01  -3.6006857e+00  -5.7616530e-01
   2.3286135e+01  -2.1078115e+01   4.0000000e+02  -1.8886838e-01  -3.6748341e+00  -3.7598076e-01
   2.3150396e+01  -2.1057139e+01   4.0000000e+02  -2.1624470e-01  -3.7448682e+00  -1.7041382e-01
   2.3014039e+01  -2.1040136e+01   4.0000000e+02  -2.4377929e-01  -3.8098545e+00   4.0919165e-02
   2.2877192e+01  -2.1027122e+01   4.0000000e+02  -2.7078996e-01  -3.8687153e+00   2.5830532e-01
   2.2739985e+01  -2.1018110e+01   4.0000000e+02  -2.9663388e-01  -3.9202577e+00   4.8188122e-01
   2.2602551e+01  -2.1013108e+01   4.0000000e+02  -3.2070090e-01  -3.9632160e+00   7.1159460e-01
   2.2465019e+01  -2.1012121e+01   4.0000000e+02  -3.4240474e-01  -3.9963046e+00   9.4718994e-01
   2.2327520e+01  -2.1015150e+01   4.0000000e+02  -3.6117385e-01  -4.0182709e+00   1.1881845e+00
   2.2190185e+01  -2.1022193e+01   4.0000000e+02  -3.7644393e-01  -4.0279546e+00   1.4338690e+00
   2.2053146e+01  -2.1033242e+01   4.0000000e+02  -3.8765507e-01  -4.0243452e+00   1.6833150e+00
   2.1916531e+01  -2.1048287e+01   4.0000000e+02  -3.9424850e-01  -4.0066367e+00   1.9354043e+00
   2.1780472e+01  -2.1067314e+01   4.0000000e+02  -3.9566918e-01  -3.9742756e+00   2.1888431e+00
   2.1645099e+01  -2.1090304e+01   4.0000000e+02  -3.9137365e-01  -3.9269975e+00   2.4422098e+00
   2.1510540e+01  -2.1117235e+01   4.0000000e+02  -3.8083842e-01  -3.8648513e+00   2.6939958e+00
   2.1376925e+01  -2.1148081e+01   4.0000000e+02  -3.6357320e-01  -3.7882102e+00   2.9426411e+00
   2.1244380e+01  -2.1182813e+01   4.0000000e+02  -3.3913593e-01  -3.6977618e+00   3.1865866e+00
   2.1113034e+01  -2.1221398e+01   4.0000000e+02  -3.0715007e-01  -3.5944889e+00   3.4242990e+00
   2.0983013e+01  -2.1263798e+01   4.0000000e+02  -2.6732368e-01  -3.4796277e+00   3.6543112e+00
   2.0854442e+01  -2.1309973e+01   4.0000000e+02  -2.1946355e-01  -3.3546190e+00   3.8752415e+00
   2.0727444e+01  -2.1359879e+01   4.0000000e+02  -1.6349294e-01  -3.2210479e+00   4.0858075e+00
   2.0602144e+01  -2.1413467e+01   4.0000000e+02  -9.9466277e-02  -3.0805851e+00   4.2848233e+00
   2.0478663e+01  -2.1470685e+01   4.0000000e+02  -2.7576859e-02  -2.9349181e+00   4.4712066e+00
   2.0357120e+01  -2.1531480e+01   4.0000000e+02   5.1840694e-02  -2.7856949e+00   4.6439668e+00
   2.0237635e+01  -2.1595791e+01   4.0000000e+02   1.3830170e-01  -2.6344782e+00   4.8021909e+00
   2.0120326e+01  -2.1663558e+01   4.0000000e+02   2.3118917e-01  -2.4827026e+00   4.9450390e+00
   2.0005307e+01  -2.1734714e+01   4.0000000e+02   3.2975592e-01  -2.3316452e+00   5.0717418e+00
   1.9892693e+01  -2.1809191e+01   4.0000000e+02   4.3315090e-01  -2.1824171e+00   5.1815939e+00
   1.9782595e+01  -2.1886917e+01   4.0000000e+02   5.4043867e-01  -2.0359547e+00   5.2739658e+00
   1.9675124e+01  -2.1967816e+01   4.0000000e+02   6.5062638e-01  -1.8930315e+00   5.3483123e+00
   1.9570388e+01  -2.2051811e+01   4.0000000e+02   7.6269661e-01  -1.7542705e+00   5.4041910e+00
   1.9468492e+01  -2.2138818e+01   4.0000000e+02   8.7562736e-01  -1.6201657e+00   5.4412844e+00
   1.9369541e+01  -2.2228755e+01   4.0000000e+02   9.8842999e-01  -1.4911125e+00   5.4594145e+00
   1.9273635e+01  -2.2321533e+01   4.0000000e+02   1.1001579e+00  -1.3674285e+00   5.4585709e+00
   1.9180874e+01  -2.2417061e+01   4.0000000e+02   1.2099289e+00  -1.2493889e+00   5.4389211e+00
   1.9091353e+01  -2.2515247e+01   4.0000000e+02   1.3169337e+00  -1.1372455e+00   5.4008248e+00
   1.9005168e+01  -2.2615993e+01   4.0000000e+02   1.4204327e+00  -1.0312574e+00   5.3448402e+00
   1.8922409e+01  -2.2719203e+01   4.0000000e+02   1.5197590e+00  -9.3169924e-01   5.2717199e+00
   1.8843164e+01  -2.2824773e+01   4.0000000e+02   1.6142981e+00  -8.3887656e-01   5.1824094e+00
   1.8767518e+01  -2.2932601e+01   4.0000000e+02   1.7034854e+00  -7.5312989e-01   5.0780227e+00
   1.8695556e+01  -2.3042579e+01   4.0000000e+02   1.7867835e+00  -6.7483391e-01   4.9598270e+00
   1.8627356e+01  -2.3154600e+01   4.0000000e+02   1.8636738e+00  -6.0437781e-01   4.8292088e+00
   1.8562994e+01  -2.3268552e+01   4.0000000e+02   1.9336391e+00  -5.4215345e-01   4.6876460e+00
   1.8502543e+01  -2.3384322e+01   4.0000000e+02   1.9961585e+00  -4.8853203e-01   4.5366662e+00
   1.8446075e+01  -2.3501796e+01   4.0000000e+02   2.0507035e+00  -4.4384089e-01   4.3778081e+00
   1.8393654e+01  -2.3620856e+01   4.0000000e+02   2.0967354e+00  -4.0832485e-01   4.2125898e+00
   1.8345344e+01  -2.3741382e+01   4.0000000e+02   2.1337146e+00  -3.8213228e-01   4.0424690e+00
   1.8301205e+01  -2.3863256e+01   4.0000000e+02   2.1611133e+00  -3.6528830e-01   3.8688073e+00
   1.8261291e+01  -2.3986353e+01   4.0000000e+02   2.1784266e+00  -3.5767156e-01   3.6928626e+00
   1.8225656e+01  -2.4110551e+01   4.0000000e+02   2.1851986e+00  -3.5901736e-01   3.5157552e+00
   1.8194347e+01  -2.4235723e+01   4.0000000e+02   2.1810404e+00  -3.6890303e-01   3.3384772e+00
   1.8167407e+01  -2.4361744e+01   4.0000000e+02   2.1656572e+00  -3.8676281e-01   3.1618819e+00
   1.8144879e+01  -2.4488485e+01   4.0000000e+02   2.1388739e+00  -4.1190661e-01   2.9867010e+00
   1.8126796e+01  -2.4615817e+01   4.0000000e+02   2.1006542e+00  -4.4353042e-01   2.8135579e+00
   1.8113192e+01  -2.4743611e+01   4.0000000e+02   2.0511235e+00  -4.8076032e-01   2.6429814e+00
   1.8104094e+01  -2.4871735e+01   4.0000000e+02   1.9905794e+00  -5.2267176e-01   2.4754336e+00
   1.8099525e+01  -2.5000059e+01   4.0000000e+02   1.9194968e+00  -5.6832910e-01   2.3113210e+00
   1.8099504e+01  -2.5128449e+01   4.0000000e+02   1.8385256e+00  -6.1681511e-01   2.1510185e+00
   1.8104045e+01  -2.5256773e+01   4.0000000e+02   1.7484738e+00  -6.6726081e-01   1.9948752e+00
   1.8113158e+01  -2.5384899e+01   4.0000000e+02   1.6502841e+00  -7.1886934e-01   1.8432240e+00
   1.8126848e+01  -2.5512693e+01   4.0000000e+02   1.5450015e+00  -7.7093078e-01   1.6963886e+00
   1.8145116e+01  -2.5640021e+01   4.0000000e+02   1.4337324e+00  -8.2283321e-01   1.5546794e+00
   1.8167958e+01  -2.5766751e+01   4.0000000e+02   1.3175963e+00  -8.7406275e-01   1.4183887e+00
   1.8195363e+01  -2.5892749e+01   4.0000000e+02   1.1976836e+00  -9.2419354e-01   1.2877899e+00
   1.8227318e+01  -2.6017883e+01   4.0000000e+02   1.0750067e+00  -9.7288116e-01   1.1631235e+00
   1.8263805e+01  -2.6142020e+01   4.0000000e+02   9.5046380e-01  -1.0198398e+00   1.0445946e+00
   1.8304799e+01  -2.6265030e+01   4.0000000e+02   8.2480284e-01  -1.0648190e+00   9.3236636e-01
   1.8350270e+01  -2.6386779e+01   4.0000000e+02   6.9860882e-01  -1.1075834e+00   8.2655888e-01
   1.8400186e+01  -2.6507140e+01   4.0000000e+02   5.7228411e-01  -1.1478956e+00   7.2723848e-01
   1.8454507e+01  -2.6625982e+01   4.0000000e+02   4.4606507e-01  -1.1854938e+00   6.3442981e-01
   1.8513188e+01  -2.6743179e+01   4.0000000e+02   3.2003092e-01  -1.2200838e+00   5.4811178e-01
   1.8576181e+01  -2.6858603e+01   4.0000000e+02   1.9413992e-01  -1.2513382e+00   4.6822233e-01
   1.8643430e+01  -2.6972130e+01   4.0000000e+02   6.8262819e-02  -1.2788951e+00   3.9466634e-01
   1.8714876e+01  -2.7083636e+01   4.0000000e+02  -5.7769436e-02  -1.3023734e+00   3.2731647e-01
   1.8790455e+01  -2.7192999e+01   4.0000000e+02  -1.8412066e-01  -1.3213882e+00   2.6601880e-01
   1.8870096e+01  -2.7300101e+01   4.0000000e+02  -3.1090549e-01  -1.3355679e+00   2.1059865e-01
   1.8953724e+01  -2.7404824e+01   4.0000000e+02  -4.3814688e-01  -1.3445806e+00   1.6085922e-01
   1.9041259e+01  -2.7507052e+01   4.0000000e+02  -5.6574703e-01  -1.3481534e+00   1.1658401e-01
   1.9132616e+01  -2.7606672e+01   4.0000000e+02  -6.9346881e-01  -1.3460892e+00   7.7538740e-02
   1.9227705e+01  -2.7703575e+01   4.0000000e+02  -8.2092963e-01  -1.3382785e+00   4.3474743e-02
   1.9326430e+01  -2.7797652e+01   4.0000000e+02  -9.4760328e-01  -1.3247063e+00   1.4131703e-02
   1.9428692e+01  -2.7888798e+01   4.0000000e+02  -1.0728425e+00  -1.3054487e+00  -1.0756345e-02
   1.9534387e+01  -2.7976912e+01   4.0000000e+02  -1.1959050e+00  -1.2806619e+00  -3.1448554e-02
   1.9643403e+01  -2.8061895e+01   4.0000000e+02  -1.3159844e+00  -1.2505670e+00  -4.8183123e-02
   1.9755629e+01  -2.8143652e+01   4.0000000e+02  -1.4322531e+00  -1.2154286e+00  -6.1168352e-02
   1.9870945e+01  -2.8222089e+01   4.0000000e+02  -1.5438925e+00  -1.1755316e+00  -7.0559353e-02
   1.9989228e+01  -2.8297119e+01   4.0000000e+02  -1.6501333e+00  -1.1311541e+00  -7.6439538e-02
   2.0110352e+01  -2.8368657e+01   4.0000000e+02  -1.7502802e+00  -1.0825481e+00  -7.8810115e-02
   2.0234185e+01  -2.8436620e+01   4.0000000e+02  -1.8437308e+00  -1.0299218e+00  -7.7575917e-02
   2.0360592e+01  -2.8500932e+01   4.0000000e+02  -1.9299912e+00  -9.7342559e-01  -7.2533579e-02
   2.0489434e+01  -2.8561520e+01   4.0000000e+02  -2.0086778e+00  -9.1315013e-01  -6.3374690e-02
   2.0620570e+01  -2.8618313e+01   4.0000000e+02  -2.0795144e+00  -8.4912980e-01  -4.9694481e-02
   2.0753853e+01  -2.8671247e+01   4.0000000e+02  -2.1423244e+00  -7.8135344e-01  -3.0993777e-02
   2.0889134e+01  -2.8720262e+01   4.0000000e+02  -2.1970200e+00  -7.0978384e-01  -6.7045392e-03
   2.1026261e+01  -2.8765300e+01   4.0000000e+02  -2.2435885e+00  -6.3438371e-01   2.3783395e-02
   2.1165080e+01  -2.8806309e+01   4.0000000e+02  -2.2820828e+00  -5.5514357e-01   6.1100813e-02
   2.1305433e+01  -2.8843244e+01   4.0000000e+02  -2.3126113e+00  -4.7211545e-01   1.0587079e-01
   2.1447160e+01  -2.8876060e+01   4.0000000e+02  -2.3353327e+00  -3.8544661e-01   1.5866256e-01
   2.1590100e+01  -2.8904720e+01   4.0000000e+02  -2.3504558e+00  -2.9540782e-01   2.1997233e-01
   2.1734090e+01  -2.8929190e+01   4.0000000e+02  -2.3582418e+00  -2.0242083e-01   2.9018113e-01
   2.1878962e+01  -2.8949443e+01   4.0000000e+02  -2.3590099e+00  -1.0707811e-01   3.6952839e-01
   2.2024552e+01  -2.8965454e+01   4.0000000e+02  -2.3531458e+00  -1.0145326e-02   4.5807497e-01
   2.2170691e+01  -2.8977206e+01   4.0000000e+02  -2.3411089e+00   8.7437426e-02   5.5568535e-01
   2.2317210e+01  -2.8984684e+01   4.0000000e+02  -2.3234393e+00   1.8457677e-01   6.6199731e-01
   2.2463940e+01  -2.8987880e+01   4.0000000e+02  -2.3007598e+00   2.8005707e-01   7.7641781e-01
   2.2610713e+01  -2.8986789e+01   4.0000000e+02  -2.2737749e+00   3.7258480e-01   8.9811326e-01
   2.2757357e+01  -2.8981415e+01   4.0000000e+02  -2.2432624e+00   4.6083696e-01   1.0260217e+00
   2.2903704e+01  -2.8971761e+01   4.0000000e+02  -2.2100619e+00   5.4352685e-01   1.1588622e+00
   2.3049584e+01  -2.8957841e+01   4.0000000e+02  -2.1750531e+00   6.1945712e-01   1.2951781e+00
   2.3194830e+01  -2.8939670e+01   4.0000000e+02  -2.1391352e+00   6.8758112e-01   1.4333677e+00
   2.3339274e+01  -2.8917268e+01   4.0000000e+02  -2.1032006e+00   7.4704794e-01   1.5717340e+00
   2.4096253e+01  -2.8862791e+01   4.0000000e+02  -1.8533844e+00   8.4464898e-01   2.3953147e+00
   2.4232789e+01  -2.8815636e+01   4.0000000e+02  -1.8302739e+00   8.4424351e-01   2.4957769e+00
   2.4367451e+01  -2.8764641e+01   4.0000000e+02  -1.8116213e+00   8.3630835e-01   2.5866244e+00
   2.4500096e+01  -2.8709861e+01   4.0000000e+02  -1.7975786e+00   8.2169854e-01   2.6670970e+00
   2.4630585e+01  -2.8651355e+01   4.0000000e+02  -1.7881941e+00   8.0134612e-01   2.7366242e+00
   2.4758781e+01  -2.8589188e+01   4.0000000e+02  -1.7834252e+00   7.7622305e-01   2.7948151e+00
   2.4884551e+01  -2.8523425e+01   4.0000000e+02  -1.7831581e+00   7.4731029e-01   2.8414406e+00
   2.5007765e+01  -2.8454138e+01   4.0000000e+02  -1.7872202e+00   7.1556696e-01   2.8764225e+00
   2.5128297e+01  -2.8381402e+01   4.0000000e+02  -1.7953998e+00   6.8190853e-01   2.8998121e+00
   2.5246025e+01  -2.8305293e+01   4.0000000e+02  -1.8074648e+00   6.4718930e-01   2.9117711e+00
   2.5360828e+01  -2.8225895e+01   4.0000000e+02  -1.8231738e+00   6.1218701e-01   2.9125581e+00
   2.5472593e+01  -2.8143290e+01   4.0000000e+02  -1.8422939e+00   5.7759226e-01   2.9025075e+00
   2.5581209e+01  -2.8057568e+01   4.0000000e+02  -1.8646056e+00   5.4399989e-01   2.8820185e+00
   2.5686569e+01  -2.7968819e+01   4.0000000e+02  -1.8899149e+00   5.1190566e-01   2.8515316e+00
   2.5788570e+01  -2.7877136e+01   4.0000000e+02  -1.9180531e+00   4.8170165e-01   2.8115141e+00
   2.5887114e+01  -2.7782618e+01   4.0000000e+02  -1.9488723e+00   4.5367344e-01   2.7624454e+00
   2.5982109e+01  -2.7685362e+01   4.0000000e+02  -1.9822431e+00   4.2800407e-01   2.7047901e+00
   2.6073464e+01  -2.7585471e+01   4.0000000e+02  -2.0180393e+00   4.0477860e-01   2.6389865e+00
   2.6161095e+01  -2.7483050e+01   4.0000000e+02  -2.0561220e+00   3.8398919e-01   2.5654285e+00
   2.6244923e+01  -2.7378205e+01   4.0000000e+02  -2.0963225e+00   3.6554735e-01   2.4844513e+00
   2.6324871e+01  -2.7271044e+01   4.0000000e+02  -2.1384226e+00   3.4929877e-01   2.3963241e+00
   2.6400870e+01  -2.7161679e+01   4.0000000e+02  -2.1821325e+00   3.3503412e-01   2.3012541e+00
   2.6472853e+01  -2.7050223e+01   4.0000000e+02  -2.2270798e+00   3.2251035e-01   2.1993870e+00
   2.6540758e+01  -2.6936789e+01   4.0000000e+02  -2.2727998e+00   3.1146499e-01   2.0908202e+00
   2.6604530e+01  -2.6821495e+01   4.0000000e+02  -2.3187305e+00   3.0162821e-01   1.9756284e+00
   2.6664117e+01  -2.6704458e+01   4.0000000e+02  -2.3642250e+00   2.9273882e-01   1.8538767e+00
   2.6719472e+01  -2.6585797e+01   4.0000000e+02  -2.4085655e+00   2.8455056e-01   1.7256486e+00
   2.6770551e+01  -2.6465632e+01   4.0000000e+02  -2.4509881e+00   2.7683772e-01   1.5910647e+00
   2.6817318e+01  -2.6344085e+01   4.0000000e+02  -2.4907128e+00   2.6939227e-01   1.4503041e+00
   2.6859740e+01  -2.6221278e+01   4.0000000e+02  -2.5269785e+00   2.6202337e-01   1.3036103e+00
   2.6897788e+01  -2.6097334e+01   4.0000000e+02  -2.5590768e+00   2.5454973e-01   1.1512964e+00
   2.6931439e+01  -2.5972378e+01   4.0000000e+02  -2.5863826e+00   2.4678949e-01   9.9374445e-01
   2.6960673e+01  -2.5846533e+01   4.0000000e+02  -2.6083811e+00   2.3855177e-01   8.3138766e-01
   2.6985477e+01  -2.5719925e+01   4.0000000e+02  -2.6246833e+00   2.2962422e-01   6.6470476e-01
   2.7005839e+01  -2.5592680e+01   4.0000000e+02  -2.6350344e+00   2.1976664e-01   4.9419392e-01
   2.7021754e+01  -2.5464922e+01   4.0000000e+02  -2.6393104e+00   2.0870075e-01   3.2035561e-01
   2.7033221e+01  -2.5336777e+01   4.0000000e+02  -2.6375050e+00   1.9610688e-01   1.4368066e-01
   2.7040243e+01  -2.5208372e+01   4.0000000e+02  -2.6297087e+00   1.8162248e-01  -3.5362432e-02
   2.7042827e+01  -2.5079831e+01   4.0000000e+02  -2.6160800e+00   1.6484376e-01  -2.1633778e-01
   2.7040984e+01  -2.4951279e+01   4.0000000e+02  -2.5968143e+00   1.4533143e-01  -3.9883324e-01
   2.7034731e+01  -2.4822841e+01   4.0000000e+02  -2.5721127e+00   1.2261935e-01  -5.8244923e-01
   2.7024088e+01  -2.4694643e+01   4.0000000e+02  -2.5421529e+00   9.6227951e-02  -7.6678134e-01
   2.7009076e+01  -2.4566806e+01   4.0000000e+02  -2.5070645e+00   6.5677972e-02  -9.5140593e-01
   2.6989726e+01  -2.4439455e+01   4.0000000e+02  -2.4669187e+00   3.0507660e-02  -1.1358336e+00
   2.6966067e+01  -2.4312712e+01   4.0000000e+02  -2.4217194e+00  -9.7087352e-03  -1.3195002e+00
   2.6938135e+01  -2.4186697e+01   4.0000000e+02  -2.3714113e+00  -5.5344493e-02  -1.5017338e+00
   2.6905970e+01  -2.4061531e+01   4.0000000e+02  -2.3158967e+00  -1.0670176e-01  -1.6817350e+00
   2.6869613e+01  -2.3937333e+01   4.0000000e+02  -2.2550568e+00  -1.6399792e-01  -1.8585728e+00
   2.6829112e+01  -2.3814220e+01   4.0000000e+02  -2.1887834e+00  -2.2735447e-01  -2.0311824e+00
   2.6784515e+01  -2.3692310e+01   4.0000000e+02  -2.1170080e+00  -2.9678856e-01  -2.1983778e+00
   2.6735876e+01  -2.3571717e+01   4.0000000e+02  -2.0397327e+00  -3.7221303e-01  -2.3588771e+00
   2.6683251e+01  -2.3452554e+01   4.0000000e+02  -1.9570544e+00  -4.5343820e-01  -2.5113323e+00
   2.6626700e+01  -2.3334934e+01   4.0000000e+02  -1.8691859e+00  -5.4017846e-01  -2.6543645e+00
   2.6566286e+01  -2.3218967e+01   4.0000000e+02  -1.7764642e+00  -6.3206585e-01  -2.7866074e+00
   2.6502074e+01  -2.3104761e+01   4.0000000e+02  -1.6793543e+00  -7.2866422e-01  -2.9067451e+00
   2.6434133e+01  -2.2992422e+01   4.0000000e+02  -1.5784456e+00  -8.2948440e-01  -3.0135480e+00
   2.6362536e+01  -2.2882056e+01   4.0000000e+02  -1.4744436e+00  -9.3399809e-01  -3.1059024e+00
   2.6287357e+01  -2.2773764e+01   4.0000000e+02  -1.3681514e+00  -1.0416566e+00  -3.1828416e+00
   2.6208673e+01  -2.2667647e+01   4.0000000e+02  -1.2604563e+00  -1.1518987e+00  -3.2435618e+00
   2.6126565e+01  -2.2563803e+01   4.0000000e+02  -1.1523115e+00  -1.2641610e+00  -3.2874402e+00
   2.6041115e+01  -2.2462328e+01   4.0000000e+02  -1.0447155e+00  -1.3778853e+00  -3.3140457e+00
   2.5952409e+01  -2.2363316e+01   4.0000000e+02  -9.3869533e-01  -1.4925219e+00  -3.3231476e+00
   2.5860534e+01  -2.2266857e+01   4.0000000e+02  -8.3528411e-01  -1.6075358e+00  -3.3147209e+00
   2.5765580e+01  -2.2173041e+01   4.0000000e+02  -7.3550504e-01  -1.7224069e+00  -3.2889479e+00
   2.5667641e+01  -2.2081952e+01   4.0000000e+02  -6.4034829e-01  -1.8366375e+00  -3.2462184e+00
   2.5566809e+01  -2.1993676e+01   4.0000000e+02  -5.5075056e-01  -1.9497578e+00  -3.1871210e+00
   2.5463183e+01  -2.1908291e+01   4.0000000e+02  -4.6757372e-01  -2.0613345e+00  -3.1124367e+00
   2.5356861e+01  -2.1825877e+01   4.0000000e+02  -3.9158323e-01  -2.1709810e+00  -3.0231174e+00
   2.5247944e+01  -2.1746508e+01   4.0000000e+02  -3.2342593e-01  -2.2783707e+00  -2.9202638e+00
   2.5136533e+01  -2.1670257e+01   4.0000000e+02  -2.6361168e-01  -2.3832479e+00  -2.8050912e+00
   2.5022735e+01  -2.1597193e+01   4.0000000e+02  -2.1249833e-01  -2.4854355e+00  -2.6788960e+00
   2.4906654e+01  -2.1527383e+01   4.0000000e+02  -1.7027750e-01  -2.5848472e+00  -2.5430032e+00
   2.4788398e+01  -2.1460889e+01   4.0000000e+02  -1.3697029e-01  -2.6814847e+00  -2.3987230e+00
   2.4668077e+01  -2.1397772e+01   4.0000000e+02  -1.1242732e-01  -2.7754340e+00  -2.2473004e+00
   2.4545802e+01  -2.1338090e+01   4.0000000e+02  -9.6335118e-02  -2.8668541e+00  -2.0898650e+00
   2.4421685e+01  -2.1281896e+01   4.0000000e+02  -8.8230159e-02  -2.9559580e+00  -1.9273870e+00
   2.4295839e+01  -2.1229241e+01   4.0000000e+02  -8.7518919e-02  -3.0429852e+00  -1.7606426e+00
   2.4168379e+01  -2.1180172e+01   4.0000000e+02  -9.3502632e-02  -3.1281696e+00  -1.5901911e+00
   2.4039421e+01  -2.1134735e+01   4.0000000e+02  -1.0540443e-01  -3.2117040e+00  -1.4163636e+00
   2.3909081e+01  -2.1092970e+01   4.0000000e+02  -1.2239913e-01  -3.2937041e+00  -1.2392639e+00
   2.3777478e+01  -2.1054914e+01   4.0000000e+02  -1.4364068e-01  -3.3741719e+00  -1.0587907e+00
   2.3644730e+01  -2.1020603e+01   4.0000000e+02  -1.6828668e-01  -3.4529674e+00  -8.7466423e-01
   2.3510958e+01  -2.0990066e+01   4.0000000e+02  -1.9552073e-01  -3.5297826e+00  -6.8647099e-01
   2.3376280e+01  -2.0963332e+01   4.0000000e+02  -2.2456623e-01  -3.6041304e+00  -4.9370714e-01
   2.3240818e+01  -2.0940424e+01   4.0000000e+02  -2.5469717e-01  -3.6753355e+00  -2.9584130e-01
   2.3104694e+01  -2.0921363e+01   4.0000000e+02  -2.8524079e-01  -3.7425435e+00  -9.2365495e-02
   2.2968029e+01  -2.0906167e+01   4.0000000e+02  -3.1557652e-01  -3.8047384e+00   1.1715270e-01
   2.2830946e+01  -2.0894848e+01   4.0000000e+02  -3.4513092e-01  -3.8607684e+00   3.3301654e-01
   2.2693567e+01  -2.0887418e+01   4.0000000e+02  -3.7336646e-01  -3.9093857e+00   5.5536277e-01
   2.2556015e+01  -2.0883882e+01   4.0000000e+02  -3.9977355e-01  -3.9492895e+00   7.8412580e-01
   2.2418413e+01  -2.0884244e+01   4.0000000e+02  -4.2385676e-01  -3.9791789e+00   1.0190174e+00
   2.2280884e+01  -2.0888504e+01   4.0000000e+02  -4.4512599e-01  -3.9978077e+00   1.2595162e+00
   2.2143550e+01  -2.0896658e+01   4.0000000e+02  -4.6308856e-01  -4.0040410e+00   1.5048703e+00
   2.2006536e+01  -2.0908698e+01   4.0000000e+02  -4.7724342e-01  -3.9969094e+00   1.7541028e+00
   2.1869962e+01  -2.0924614e+01   4.0000000e+02  -4.8707946e-01  -3.9756606e+00   2.0060496e+00
   2.1733952e+01  -2.0944391e+01   4.0000000e+02  -4.9207793e-01  -3.9398007e+00   2.2593747e+00
   2.1598626e+01  -2.0968012e+01   4.0000000e+02  -4.9171735e-01  -3.8891266e+00   2.5126242e+00
   2.1464108e+01  -2.0995455e+01   4.0000000e+02  -4.8548360e-01  -3.8237466e+00   2.7642555e+00
   2.1330516e+01  -2.1026695e+01   4.0000000e+02  -4.7288171e-01  -3.7440807e+00   3.0127005e+00
   2.1197972e+01  -2.1061705e+01   4.0000000e+02  -4.5344815e-01  -3.6508544e+00   3.2563916e+00
   2.1066595e+01  -2.1100453e+01   4.0000000e+02  -4.2676992e-01  -3.5450683e+00   3.4938128e+00
   2.0936503e+01  -2.1142903e+01   4.0000000e+02  -3.9250073e-01  -3.4279581e+00   3.7235280e+00
   2.0807815e+01  -2.1189019e+01   4.0000000e+02  -3.5037406e-01  -3.3009467e+00   3.9442004e+00
   2.0680646e+01  -2.1238757e+01   4.0000000e+02  -3.0022780e-01  -3.1655798e+00   4.1546127e+00
   2.0555112e+01  -2.1292074e+01   4.0000000e+02  -2.4201012e-01  -3.0234707e+00   4.3536623e+00
   2.0431329e+01  -2.1348920e+01   4.0000000e+02  -1.7580061e-01  -2.8762399e+00   4.5403570e+00
   2.0309409e+01  -2.1409245e+01   4.0000000e+02  -1.0181181e-01  -2.7254567e+00   4.7138107e+00
   2.0189464e+01  -2.1472994e+01   4.0000000e+02  -2.0399431e-02  -2.5725983e+00   4.8732225e+00
   2.0071604e+01  -2.1540108e+01   4.0000000e+02   6.7939174e-02  -2.4190141e+00   5.0178667e+00
   1.9955939e+01  -2.1610529e+01   4.0000000e+02   1.6257813e-01  -2.2659055e+00   5.1470794e+00
   1.9842576e+01  -2.1684190e+01   4.0000000e+02   2.6276273e-01  -2.1143118e+00   5.2602571e+00
   1.9731622e+01  -2.1761026e+01   4.0000000e+02   3.6764215e-01  -1.9651143e+00   5.3568537e+00
   1.9623179e+01  -2.1840966e+01   4.0000000e+02   4.7628182e-01  -1.8190387e+00   5.4363923e+00
   1.9517350e+01  -2.1923938e+01   4.0000000e+02   5.8769629e-01  -1.6766795e+00   5.4984712e+00
   1.9414236e+01  -2.2009866e+01   4.0000000e+02   7.0087267e-01  -1.5385169e+00   5.5427826e+00
   1.9313935e+01  -2.2098672e+01   4.0000000e+02   8.1480000e-01  -1.4049399e+00   5.5691312e+00
   1.9216543e+01  -2.2190274e+01   4.0000000e+02   9.2849063e-01  -1.2762731e+00   5.5774509e+00
   1.9122155e+01  -2.2284588e+01   4.0000000e+02   1.0410026e+00  -1.1528031e+00   5.5678200e+00
   1.9030862e+01  -2.2381528e+01   4.0000000e+02   1.1514537e+00  -1.0347976e+00   5.5404749e+00
   1.8942755e+01  -2.2481005e+01   4.0000000e+02   1.2590282e+00  -9.2253172e-01   5.4958173e+00
   1.8857919e+01  -2.2582927e+01   4.0000000e+02   1.3629787e+00  -8.1629484e-01   5.4344201e+00
   1.8776441e+01  -2.2687201e+01   4.0000000e+02   1.4626258e+00  -7.1641358e-01   5.3570203e+00
   1.8698403e+01  -2.2793729e+01   4.0000000e+02   1.5573457e+00  -6.2324590e-01   5.2645174e+00
   1.8623884e+01  -2.2902414e+01   4.0000000e+02   1.6465665e+00  -5.3718341e-01   5.1579534e+00
   1.8552961e+01  -2.3013155e+01   4.0000000e+02   1.7297516e+00  -4.5864381e-01   5.0384990e+00
   1.8485708e+01  -2.3125849e+01   4.0000000e+02   1.8063910e+00  -3.8805558e-01   4.9074282e+00
   1.8422197e+01  -2.3240390e+01   4.0000000e+02   1.8759914e+00  -3.2583960e-01   4.7660923e+00
   1.8362495e+01  -2.3356673e+01   4.0000000e+02   1.9380717e+00  -2.7238234e-01   4.6158853e+00
   1.8306669e+01  -2.3474588e+01   4.0000000e+02   1.9921561e+00  -2.2801595e-01   4.4582190e+00
   1.8254781e+01  -2.3594025e+01   4.0000000e+02   2.0377772e+00  -1.9298641e-01   4.2944864e+00
   1.8206889e+01  -2.3714872e+01   4.0000000e+02   2.0744783e+00  -1.6743056e-01   4.1260348e+00
   1.8163049e+01  -2.3837014e+01   4.0000000e+02   2.1018215e+00  -1.5135881e-01   3.9541421e+00
   1.8123314e+01  -2.3960337e+01   4.0000000e+02   2.1193999e+00  -1.4464110e-01   3.7799903e+00
   1.8087733e+01  -2.4084724e+01   4.0000000e+02   2.1268502e+00  -1.4699689e-01   3.6046592e+00
   1.8056352e+01  -2.4210057e+01   4.0000000e+02   2.1238698e+00  -1.5799827e-01   3.4291165e+00
   1.8029211e+01  -2.4336217e+01   4.0000000e+02   2.1102345e+00  -1.7707432e-01   3.2542196e+00
   1.8006351e+01  -2.4463082e+01   4.0000000e+02   2.0858205e+00  -2.0353664e-01   3.0807228e+00
   1.7987804e+01  -2.4590533e+01   4.0000000e+02   2.0506184e+00  -2.3659022e-01   2.9092831e+00
   1.7973603e+01  -2.4718446e+01   4.0000000e+02   2.0047543e+00  -2.7537160e-01   2.7404823e+00
   1.7963774e+01  -2.4846698e+01   4.0000000e+02   1.9484983e+00  -3.1897071e-01   2.5748358e+00
   1.7958339e+01  -2.4975166e+01   4.0000000e+02   1.8822718e+00  -3.6646628e-01   2.4128066e+00
   1.7957318e+01  -2.5103725e+01   4.0000000e+02   1.8066484e+00  -4.1695813e-01   2.2548190e+00
   1.7960726e+01  -2.5232251e+01   4.0000000e+02   1.7223419e+00  -4.6959180e-01   2.1012632e+00
   1.7968574e+01  -2.5360618e+01   4.0000000e+02   1.6301906e+00  -5.2358153e-01   1.9525037e+00
   1.7980868e+01  -2.5488700e+01   4.0000000e+02   1.5311298e+00  -5.7822650e-01   1.8088776e+00
   1.7997609e+01  -2.5616372e+01   4.0000000e+02   1.4261576e+00  -6.3292081e-01   1.6706927e+00
   1.8018797e+01  -2.5743509e+01   4.0000000e+02   1.3162986e+00  -6.8716030e-01   1.5382223e+00
   1.8044425e+01  -2.5869984e+01   4.0000000e+02   1.2025639e+00  -7.4052929e-01   1.4117053e+00
   1.8074481e+01  -2.5995673e+01   4.0000000e+02   1.0859063e+00  -7.9269261e-01   1.2913363e+00
   1.8108951e+01  -2.6120450e+01   4.0000000e+02   9.6718910e-01  -8.4338118e-01   1.1772640e+00
   1.8147814e+01  -2.6244192e+01   4.0000000e+02   8.4714876e-01  -8.9236609e-01   1.0695882e+00
   1.8191046e+01  -2.6366774e+01   4.0000000e+02   7.2637814e-01  -9.3944101e-01   9.6836115e-01
   1.8238617e+01  -2.6488074e+01   4.0000000e+02   6.0530877e-01  -9.8439805e-01   8.7358843e-01
   1.8290494e+01  -2.6607968e+01   4.0000000e+02   4.8421473e-01  -1.0270132e+00   7.8523400e-01
   1.8346639e+01  -2.6726337e+01   4.0000000e+02   3.6321626e-01  -1.0670304e+00   7.0322473e-01
   1.8407007e+01  -2.6843059e+01   4.0000000e+02   2.4230958e-01  -1.1041545e+00   6.2746240e-01
   1.8471551e+01  -2.6958016e+01   4.0000000e+02   1.2139044e-01  -1.1380548e+00   5.5782413e-01
   1.8540219e+01  -2.7071091e+01   4.0000000e+02   2.9546004e-04  -1.1683707e+00   4.9417223e-01
   1.8612953e+01  -2.7182167e+01   4.0000000e+02  -1.2115441e-01  -1.1947240e+00   4.3635933e-01
   1.8689691e+01  -2.7291131e+01   4.0000000e+02  -2.4311501e-01  -1.2167383e+00   3.8422907e-01
   1.8770366e+01  -2.7397869e+01   4.0000000e+02  -3.6567403e-01  -1.2340605e+00   3.3761643e-01
   1.8854906e+01  -2.7502272e+01   4.0000000e+02  -4.8882235e-01  -1.2463806e+00   2.9634686e-01
   1.8943236e+01  -2.7604231e+01   4.0000000e+02  -6.1242512e-01  -1.2534538e+00   2.6022993e-01
   1.9035274e+01  -2.7703640e+01   4.0000000e+02  -7.3620863e-01  -1.2551126e+00   2.2906040e-01
   1.9130935e+01  -2.7800395e+01   4.0000000e+02  -8.5975838e-01  -1.2512796e+00   2.0261155e-01
   1.9230129e+01  -2.7894394e+01   4.0000000e+02  -9.8252748e-01  -1.2419690e+00   1.8063663e-01
   1.9332762e+01  -2.7985538e+01   4.0000000e+02  -1.1038576e+00  -1.2272825e+00   1.6287176e-01
   1.9438735e+01  -2.8073732e+01   4.0000000e+02  -1.2230071e+00  -1.2073966e+00   1.4904506e-01
   1.9547944e+01  -2.8158881e+01   4.0000000e+02  -1.3391813e+00  -1.1825484e+00   1.3888436e-01
   1.9660282e+01  -2.8240897e+01   4.0000000e+02  -1.4515747e+00  -1.1530103e+00   1.3213721e-01
   1.9775638e+01  -2.8319690e+01   4.0000000e+02  -1.5593988e+00  -1.1190714e+00   1.2858037e-01
   1.9893896e+01  -2.8395178e+01   4.0000000e+02  -1.6619196e+00  -1.0810081e+00   1.2805054e-01
   2.0014936e+01  -2.8467279e+01   4.0000000e+02  -1.7584780e+00  -1.0390681e+00   1.3045267e-01
   2.0138635e+01  -2.8535917e+01   4.0000000e+02  -1.8485113e+00  -9.9344972e-01   1.3578245e-01
   2.0264866e+01  -2.8601016e+01   4.0000000e+02  -1.9315597e+00  -9.4429362e-01   1.4413036e-01
   2.0393498e+01  -2.8662508e+01   4.0000000e+02  -2.0072716e+00  -8.9167461e-01   1.5569897e-01
   2.0524398e+01  -2.8720326e+01   4.0000000e+02  -2.0753965e+00  -8.3560728e-01   1.7079097e-01
   2.0657429e+01  -2.8774407e+01   4.0000000e+02  -2.1357761e+00  -7.7605455e-01   1.8980754e-01
   2.0792450e+01  -2.8824692e+01   4.0000000e+02  -2.1883316e+00  -7.1294439e-01   2.1323473e-01
   2.0929318e+01  -2.8871127e+01   4.0000000e+02  -2.2330510e+00  -6.4619120e-01   2.4162517e-01
   2.1067889e+01  -2.8913662e+01   4.0000000e+02  -2.2699766e+00  -5.7572238e-01   2.7557304e-01
   2.1208013e+01  -2.8952250e+01   4.0000000e+02  -2.2991936e+00  -5.0151053e-01   3.1568696e-01
   2.1349541e+01  -2.8986849e+01   4.0000000e+02  -2.3208267e+00  -4.2360108e-01   3.6256238e-01
   2.1492320e+01  -2.9017421e+01   4.0000000e+02  -2.3350366e+00  -3.4214518e-01   4.1675062e-01
   2.1636196e+01  -2.9043932e+01   4.0000000e+02  -2.3420243e+00  -2.5742555e-01   4.7872715e-01
   2.1781013e+01  -2.9066355e+01   4.0000000e+02  -2.3420366e+00  -1.6987886e-01   5.4886606e-01
   2.1926614e+01  -2.9084663e+01   4.0000000e+02  -2.3353770e+00  -8.0109405e-02   6.2739721e-01
   2.2072840e+01  -2.9098837e+01   4.0000000e+02  -2.3224149e+00   1.1106643e-02   7.1439209e-01
   2.2219533e+01  -2.9108862e+01   4.0000000e+02  -2.3035961e+00   1.0283064e-01   8.0973282e-01
   2.2366531e+01  -2.9114726e+01   4.0000000e+02  -2.2794509e+00   1.9397899e-01   9.1308810e-01
   2.2513676e+01  -2.9116423e+01   4.0000000e+02  -2.2505963e+00   2.8336039e-01   1.0239101e+00
   2.2660805e+01  -2.9113951e+01   4.0000000e+02  -2.2177357e+00   3.6971387e-01   1.1414212e+00
   2.2807759e+01  -2.9107313e+01   4.0000000e+02  -2.1816488e+00   4.5176552e-01   1.2646280e+00
   2.2954377e+01  -2.9096516e+01   4.0000000e+02  -2.1431792e+00   5.2828121e-01   1.3923327e+00
   2.3100500e+01  -2.9081572e+01   4.0000000e+02  -2.1032132e+00   5.9812472e-01   1.5231664e+00
   2.3245967e+01  -2.9062498e+01   4.0000000e+02  -2.0626566e+00   6.6030799e-01   1.6556228e+00
   2.3390621e+01  -2.9039314e+01   4.0000000e+02  -2.0224072e+00   7.1403847e-01   1.7881079e+00
   2.3534304e+01  -2.9012045e+01   4.0000000e+02  -1.9833283e+00   7.5874899e-01   1.9189878e+00
   2.3676862e+01  -2.8980722e+01   4.0000000e+02  -1.9462202e+00   7.9411777e-01   2.0466471e+00
   2.3818141e+01  -2.8945379e+01   4.0000000e+02  -1.9118011e+00   8.2007349e-01   2.1695301e+00
   2.3957988e+01  -2.8906054e+01   4.0000000e+02  -1.8806883e+00   8.3678681e-01   2.2861872e+00
   2.4700234e+01  -2.8764147e+01   4.0000000e+02  -1.6769417e+00   7.2270276e-01   2.8985890e+00
   2.4828699e+01  -2.8701863e+01   4.0000000e+02  -1.6716384e+00   6.9468886e-01   2.9522527e+00
   2.4954798e+01  -2.8636081e+01   4.0000000e+02  -1.6710565e+00   6.6319178e-01   2.9949451e+00
   2.5078409e+01  -2.8566866e+01   4.0000000e+02  -1.6750027e+00   6.2914188e-01   3.0266140e+00
   2.5199411e+01  -2.8494290e+01   4.0000000e+02  -1.6832440e+00   5.9342936e-01   3.0473316e+00
   2.5317689e+01  -2.8418426e+01   4.0000000e+02  -1.6955270e+00   5.5688768e-01   3.0572760e+00
   2.5433129e+01  -2.8339351e+01   4.0000000e+02  -1.7115933e+00   5.2028198e-01   3.0567157e+00
   2.5545622e+01  -2.8257145e+01   4.0000000e+02  -1.7311934e+00   4.8429697e-01   3.0459948e+00
   2.5655063e+01  -2.8171890e+01   4.0000000e+02  -1.7540981e+00   4.4952992e-01   3.0255170e+00
   2.5761351e+01  -2.8083672e+01   4.0000000e+02  -1.7801058e+00   4.1648351e-01   2.9957306e+00
   2.5864388e+01  -2.7992580e+01   4.0000000e+02  -1.8090471e+00   3.8556251e-01   2.9571103e+00
   2.5964080e+01  -2.7898703e+01   4.0000000e+02  -1.8407859e+00   3.5707168e-01   2.9101366e+00
   2.6060338e+01  -2.7802136e+01   4.0000000e+02  -1.8752095e+00   3.3121218e-01   2.8552822e+00
   2.6153076e+01  -2.7702974e+01   4.0000000e+02  -1.9122229e+00   3.0808766e-01   2.7929855e+00
   2.6242214e+01  -2.7601315e+01   4.0000000e+02  -1.9517300e+00   2.8770635e-01   2.7236366e+00
   2.6327675e+01  -2.7497260e+01   4.0000000e+02  -1.9936158e+00   2.6999182e-01   2.6475606e+00
   2.6409385e+01  -2.7390910e+01   4.0000000e+02  -2.0377269e+00   2.5479583e-01   2.5650042e+00
   2.6487277e+01  -2.7282370e+01   4.0000000e+02  -2.0838461e+00   2.4190873e-01   2.4761376e+00
   2.6561286e+01  -2.7171746e+01   4.0000000e+02  -2.1316770e+00   2.3107998e-01   2.3810529e+00
   2.6631354e+01  -2.7059144e+01   4.0000000e+02  -2.1808283e+00   2.2203195e-01   2.2797763e+00
   2.6697424e+01  -2.6944675e+01   4.0000000e+02  -2.2308057e+00   2.1447802e-01   2.1722902e+00
   2.6759446e+01  -2.6828448e+01   4.0000000e+02  -2.2810155e+00   2.0813484e-01   2.0585505e+00
   2.6817373e+01  -2.6710576e+01   4.0000000e+02  -2.3307733e+00   2.0273380e-01   1.9385192e+00
   2.6871163e+01  -2.6591172e+01   4.0000000e+02  -2.3793258e+00   1.9802776e-01   1.8121860e+00
   2.6920779e+01  -2.6470349e+01   4.0000000e+02  -2.4258785e+00   1.9379367e-01   1.6795918e+00
   2.6966186e+01  -2.6348224e+01   4.0000000e+02  -2.4696284e+00   1.8983209e-01   1.5408503e+00
   2.7007356e+01  -2.6224910e+01   4.0000000e+02  -2.5098024e+00   1.8596092e-01   1.3961501e+00
   2.7044263e+01  -2.6100527e+01   4.0000000e+02  -2.5456893e+00   1.8200850e-01   1.2457696e+00
   2.7076887e+01  -2.5975189e+01   4.0000000e+02  -2.5766758e+00   1.7780377e-01   1.0900554e+00
   2.7105211e+01  -2.5849016e+01   4.0000000e+02  -2.6022677e+00   1.7316584e-01   9.2942466e-01
   2.7129222e+01  -2.5722126e+01   4.0000000e+02  -2.6221081e+00   1.6789408e-01   7.6433667e-01
   2.7148913e+01  -2.5594636e+01   4.0000000e+02  -2.6359818e+00   1.6175796e-01   5.9527486e-01
   2.7164279e+01  -2.5466666e+01   4.0000000e+02  -2.6438097e+00   1.5449158e-01   4.2272940e-01
   2.7175320e+01  -2.5338334e+01   4.0000000e+02  -2.6456331e+00   1.4578806e-01   2.4717386e-01
   2.7182040e+01  -2.5209758e+01   4.0000000e+02  -2.6415895e+00   1.3529848e-01   6.9054557e-02
   2.7184445e+01  -2.5081057e+01   4.0000000e+02  -2.6318806e+00   1.2263450e-01  -1.1121565e-01
   2.7182549e+01  -2.4952349e+01   4.0000000e+02  -2.6167394e+00   1.0737162e-01  -2.9325398e-01
   2.7176365e+01  -2.4823752e+01   4.0000000e+02  -2.5963942e+00   8.9060544e-02  -4.7670242e-01
   2.7165913e+01  -2.4695383e+01   4.0000000e+02  -2.5710381e+00   6.7235940e-02  -6.6120532e-01
   2.7151215e+01  -2.4567359e+01   4.0000000e+02  -2.5408037e+00   4.1431805e-02  -8.4638739e-01
   2.7132298e+01  -2.4439796e+01   4.0000000e+02  -2.5057475e+00   1.1196199e-02  -1.0318247e+00
   2.7109191e+01  -2.4312809e+01   4.0000000e+02  -2.4658431e+00  -2.3891521e-02  -1.2170178e+00
   2.7081927e+01  -2.4186513e+01   4.0000000e+02  -2.4209884e+00  -6.4203892e-02  -1.4013624e+00
   2.7050544e+01  -2.4061021e+01   4.0000000e+02  -2.3710215e+00  -1.1004974e-01  -1.5841302e+00
   2.7015080e+01  -2.3936446e+01   4.0000000e+02  -2.3157453e+00  -1.6165886e-01  -1.7644574e+00
   2.6975579e+01  -2.3812898e+01   4.0000000e+02  -2.2549603e+00  -2.1917210e-01  -1.9413424e+00
   2.6932088e+01  -2.3690489e+01   4.0000000e+02  -2.1884999e+00  -2.8263117e-01  -2.1136510e+00
   2.6884655e+01  -2.3569327e+01   4.0000000e+02  -2.1162616e+00  -3.5197830e-01  -2.2801451e+00
   2.6833334e+01  -2.3449519e+01   4.0000000e+02  -2.0382405e+00  -4.2705619e-01  -2.4395052e+00
   2.6778179e+01  -2.3331172e+01   4.0000000e+02  -1.9545502e+00  -5.0761409e-01  -2.5903686e+00
   2.6719250e+01  -2.3214390e+01   4.0000000e+02  -1.8654402e+00  -5.9331898e-01  -2.7313690e+00
   2.6656606e+01  -2.3099276e+01   4.0000000e+02  -1.7712992e+00  -6.8376919e-01  -2.8611759e+00
   2.6590313e+01  -2.2985930e+01   4.0000000e+02  -1.6726576e+00  -7.7850891e-01  -2.9785306e+00
   2.6520437e+01  -2.2874454e+01   4.0000000e+02  -1.5701765e+00  -8.7704201e-01  -3.0822758e+00
   2.6447046e+01  -2.2764942e+01   4.0000000e+02  -1.4646304e+00  -9.7885262e-01  -3.1713893e+00
   2.6370214e+01  -2.2657493e+01   4.0000000e+02  -1.3568984e+00  -1.0834070e+00  -3.2449936e+00
   2.6290014e+01  -2.2552199e+01   4.0000000e+02  -1.2479341e+00  -1.1901734e+00  -3.3023812e+00
   2.6206523e+01  -2.2449151e+01   4.0000000e+02  -1.1387516e+00  -1.2986230e+00  -3.3430199e+00
   2.6119820e+01  -2.2348440e+01   4.0000000e+02  -1.0304036e+00  -1.4082333e+00  -3.3665614e+00
   2.6029986e+01  -2.2250152e+01   4.0000000e+02  -9.2395866e-01  -1.5184945e+00  -3.3728483e+00
   2.5937105e+01  -2.2154373e+01   4.0000000e+02  -8.2048389e-01  -1.6289072e+00  -3.3619166e+00
   2.5841262e+01  -2.2061186e+01   4.0000000e+02  -7.2102138e-01  -1.7389881e+00  -3.3339970e+00
   2.5742546e+01  -2.1970670e+01   4.0000000e+02  -6.2656874e-01  -1.8482727e+00  -3.2895156e+00
   2.5641045e+01  -2.1882904e+01   4.0000000e+02  -5.3805739e-01  -1.9563229e+00  -3.2290858e+00
   2.5536852e+01  -2.1797963e+01   4.0000000e+02  -4.5633245e-01  -2.0627340e+00  -3.1535028e+00
   2.5430060e+01  -2.1715921e+01   4.0000000e+02  -3.8213093e-01  -2.1671485e+00  -3.0637257e+00
   2.5320763e+01  -2.1636847e+01   4.0000000e+02  -3.1606138e-01  -2.2692689e+00  -2.9608544e+00
   2.5209060e+01  -2.1560809e+01   4.0000000e+02  -2.5858961e-01  -2.3688667e+00  -2.8461048e+00
   2.5095048e+01  -2.1487873e+01   4.0000000e+02  -2.1002181e-01  -2.4657981e+00  -2.7207660e+00
   2.4978827e+01  -2.1418100e+01   4.0000000e+02  -1.7049640e-01  -2.5600096e+00  -2.5861615e+00
   2.4860499e+01  -2.1351551e+01   4.0000000e+02  -1.3998103e-01  -2.6515392e+00  -2.4436023e+00
   2.4740167e+01  -2.1288282e+01   4.0000000e+02  -1.1827405e-01  -2.7405143e+00  -2.2943354e+00
   2.4617936e+01  -2.1228348e+01   4.0000000e+02  -1.0501468e-01  -2.8271385e+00  -2.1394982e+00
   2.4493910e+01  -2.1171798e+01   4.0000000e+02  -9.9698383e-02  -2.9116747e+00  -1.9800694e+00
   2.4368197e+01  -2.1118682e+01   4.0000000e+02  -1.0169903e-01  -2.9944150e+00  -1.8168404e+00
   2.4240904e+01  -2.1069044e+01   4.0000000e+02  -1.1029461e-01  -3.0756515e+00  -1.6503815e+00
   2.4112140e+01  -2.1022927e+01   4.0000000e+02  -1.2469583e-01  -3.1556390e+00  -1.4810333e+00
   2.3982015e+01  -2.0980369e+01   4.0000000e+02  -1.4407592e-01  -3.2345581e+00  -1.3089049e+00
   2.3850640e+01  -2.0941408e+01   4.0000000e+02  -1.6759780e-01  -3.3124797e+00  -1.1338890e+00
   2.3718127e+01  -2.0906075e+01   4.0000000e+02  -1.9444051e-01  -3.3893332e+00  -9.5568753e-01
   2.3584587e+01  -2.0874402e+01   4.0000000e+02  -2.2381795e-01  -3.4648835e+00  -7.7384916e-01
   2.3450134e+01  -2.0846414e+01   4.0000000e+02  -2.5499523e-01  -3.5387108e+00  -5.8782009e-01
   2.3314881e+01  -2.0822136e+01   4.0000000e+02  -2.8729588e-01  -3.6102070e+00  -3.9699234e-01
   2.3178943e+01  -2.0801588e+01   4.0000000e+02  -3.2010568e-01  -3.6785774e+00  -2.0076244e-01
   2.3042434e+01  -2.0784787e+01   4.0000000e+02  -3.5286994e-01  -3.7428560e+00   1.4179672e-03
   2.2905469e+01  -2.0771748e+01   4.0000000e+02  -3.8508557e-01  -3.8019295e+00   2.0998835e-01
   2.2768162e+01  -2.0762482e+01   4.0000000e+02  -4.1629188e-01  -3.8545714e+00   4.2523722e-01
   2.2630631e+01  -2.0756996e+01   4.0000000e+02  -4.4605730e-01  -3.8994808e+00   6.4725698e-01
   2.2492990e+01  -2.0755296e+01   4.0000000e+02  -4.7396677e-01  -3.9353350e+00   8.7592933e-01
   2.2355354e+01  -2.0757382e+01   4.0000000e+02  -4.9961065e-01  -3.9608375e+00   1.1109000e+00
   2.2217840e+01  -2.0763253e+01   4.0000000e+02  -5.2257181e-01  -3.9747744e+00   1.3515719e+00
   2.2080563e+01  -2.0772904e+01   4.0000000e+02  -5.4241988e-01  -3.9760674e+00   1.5971170e+00
   2.1943639e+01  -2.0786326e+01   4.0000000e+02  -5.5870602e-01  -3.9638250e+00   1.8464883e+00
   2.1807183e+01  -2.0803510e+01   4.0000000e+02  -5.7095992e-01  -3.9373877e+00   2.0984507e+00
   2.1671309e+01  -2.0824438e+01   4.0000000e+02  -5.7869696e-01  -3.8963628e+00   2.3516151e+00
   2.1536133e+01  -2.0849095e+01   4.0000000e+02  -5.8141667e-01  -3.8406527e+00   2.6044773e+00
   2.1401768e+01  -2.0877460e+01   4.0000000e+02  -5.7861709e-01  -3.7704638e+00   2.8554716e+00
   2.1268327e+01  -2.0909507e+01   4.0000000e+02  -5.6980522e-01  -3.6863054e+00   3.1030130e+00
   2.1135925e+01  -2.0945211e+01   4.0000000e+02  -5.5450582e-01  -3.5889750e+00   3.3455394e+00
   2.1004672e+01  -2.0984540e+01   4.0000000e+02  -5.3228255e-01  -3.4795207e+00   3.5815627e+00
   2.0874681e+01  -2.1027462e+01   4.0000000e+02  -5.0274787e-01  -3.3592043e+00   3.8096871e+00
   2.0746062e+01  -2.1073939e+01   4.0000000e+02  -4.6558484e-01  -3.2294435e+00   4.0286402e+00
   2.0618925e+01  -2.1123933e+01   4.0000000e+02  -4.2055837e-01  -3.0917563e+00   4.2372797e+00
   2.0493378e+01  -2.1177402e+01   4.0000000e+02  -3.6753452e-01  -2.9477000e+00   4.4345962e+00
   2.0369531e+01  -2.1234298e+01   4.0000000e+02  -3.0649749e-01  -2.7988199e+00   4.6196984e+00
   2.0247488e+01  -2.1294575e+01   4.0000000e+02  -2.3755322e-01  -2.6465916e+00   4.7918117e+00
   2.0127355e+01  -2.1358180e+01   4.0000000e+02  -1.6094735e-01  -2.4923907e+00   4.9502473e+00
   2.0009238e+01  -2.1425060e+01   4.0000000e+02  -7.7061470e-02  -2.3374635e+00   5.0943893e+00
   1.9893237e+01  -2.1495158e+01   4.0000000e+02   1.3584106e-02  -2.1829033e+00   5.2236869e+00
   1.9779456e+01  -2.1568413e+01   4.0000000e+02   1.1033744e-01  -2.0296580e+00   5.3376334e+00
   1.9667993e+01  -2.1644763e+01   4.0000000e+02   2.1243247e-01  -1.8785220e+00   5.4357746e+00
   1.9558947e+01  -2.1724142e+01   4.0000000e+02   3.1900386e-01  -1.7301580e+00   5.5177042e+00
   1.9452415e+01  -2.1806483e+01   4.0000000e+02   4.2911405e-01  -1.5851101e+00   5.5830756e+00
   1.9348492e+01  -2.1891715e+01   4.0000000e+02   5.4177490e-01  -1.4438260e+00   5.6316145e+00
   1.9247271e+01  -2.1979765e+01   4.0000000e+02   6.5597667e-01  -1.3066790e+00   5.6631336e+00
   1.9148843e+01  -2.2070556e+01   4.0000000e+02   7.7071065e-01  -1.1739915e+00   5.6775486e+00
   1.9053298e+01  -2.2164012e+01   4.0000000e+02   8.8499793e-01  -1.0460586e+00   5.6748900e+00
   1.8960724e+01  -2.2260050e+01   4.0000000e+02   9.9789714e-01  -9.2316613e-01   5.6553191e+00
   1.8871205e+01  -2.2358588e+01   4.0000000e+02   1.1085274e+00  -8.0560550e-01   5.6191343e+00
   1.8784825e+01  -2.2459542e+01   4.0000000e+02   1.2160721e+00  -6.9369287e-01   5.5667750e+00
   1.8701666e+01  -2.2562822e+01   4.0000000e+02   1.3197768e+00  -5.8777495e-01   5.4988275e+00
   1.8621805e+01  -2.2668340e+01   4.0000000e+02   1.4189560e+00  -4.8822992e-01   5.4160159e+00
   1.8545320e+01  -2.2776004e+01   4.0000000e+02   1.5129817e+00  -3.9547446e-01   5.3191982e+00
   1.8472284e+01  -2.2885720e+01   4.0000000e+02   1.6012782e+00  -3.0994868e-01   5.2093549e+00
   1.8402770e+01  -2.2997391e+01   4.0000000e+02   1.6833134e+00  -2.3211128e-01   5.0875736e+00
   1.8336845e+01  -2.3110921e+01   4.0000000e+02   1.7585939e+00  -1.6241482e-01   4.9550263e+00
   1.8274577e+01  -2.3226210e+01   4.0000000e+02   1.8266552e+00  -1.0129422e-01   4.8129524e+00
   1.8216029e+01  -2.3343157e+01   4.0000000e+02   1.8870586e+00  -4.9135193e-02   4.6626309e+00
   1.8161262e+01  -2.3461657e+01   4.0000000e+02   1.9393866e+00  -6.2533578e-03   4.5053588e+00
   1.8110335e+01  -2.3581608e+01   4.0000000e+02   1.9832475e+00   2.7126909e-02   4.3424156e+00
   1.8063301e+01  -2.3702902e+01   4.0000000e+02   2.0182701e+00   5.0902230e-02   4.1750515e+00
   1.8020214e+01  -2.3825432e+01   4.0000000e+02   2.0441142e+00   6.5093715e-02   4.0044564e+00
   1.7981122e+01  -2.3949089e+01   4.0000000e+02   2.0604727e+00   6.9868965e-02   3.8317475e+00
   1.7946072e+01  -2.4073763e+01   4.0000000e+02   2.0670830e+00   6.5537944e-02   3.6579566e+00
   1.7915107e+01  -2.4199342e+01   4.0000000e+02   2.0637361e+00   5.2554363e-02   3.4840258e+00
   1.7888265e+01  -2.4325714e+01   4.0000000e+02   2.0502894e+00   3.1505504e-02   3.3108056e+00
   1.7865583e+01  -2.4452765e+01   4.0000000e+02   2.0266820e+00   3.0900971e-03   3.1390614e+00
   1.7847095e+01  -2.4580380e+01   4.0000000e+02   1.9929490e+00  -3.1901811e-02   2.9694805e+00
   1.7832828e+01  -2.4708444e+01   4.0000000e+02   1.9492327e+00  -7.2610347e-02   2.8026822e+00
   1.7822810e+01  -2.4836842e+01   4.0000000e+02   1.8957966e+00  -1.1814624e-01   2.6392253e+00
   1.7817062e+01  -2.4965456e+01   4.0000000e+02   1.8330304e+00  -1.6760767e-01   2.4796234e+00
   1.7815603e+01  -2.5094168e+01   4.0000000e+02   1.7614520e+00  -2.2011730e-01   2.3243457e+00
   1.7818447e+01  -2.5222862e+01   4.0000000e+02   1.6816993e+00  -2.7484439e-01   2.1738195e+00
   1.7825607e+01  -2.5351418e+01   4.0000000e+02   1.5945221e+00  -3.3102903e-01   2.0284363e+00
   1.7837088e+01  -2.5479719e+01   4.0000000e+02   1.5007550e+00  -3.8799112e-01   1.8885450e+00
   1.7852895e+01  -2.5607646e+01   4.0000000e+02   1.4012964e+00  -4.4514834e-01   1.7544509e+00
   1.7873026e+01  -2.5735080e+01   4.0000000e+02   1.2970736e+00  -5.0201004e-01   1.6264120e+00
   1.7897477e+01  -2.5861902e+01   4.0000000e+02   1.1890093e+00  -5.5817929e-01   1.5046329e+00
   1.7926240e+01  -2.5987996e+01   4.0000000e+02   1.0779831e+00  -6.1333992e-01   1.3892600e+00
   1.7959301e+01  -2.6113241e+01   4.0000000e+02   9.6480511e-01  -6.6723686e-01   1.2803879e+00
   1.7996643e+01  -2.6237521e+01   4.0000000e+02   8.5017797e-01  -7.1966204e-01   1.1780509e+00
   1.8038245e+01  -2.6360719e+01   4.0000000e+02   7.3467965e-01  -7.7043085e-01   1.0822314e+00
   1.8084083e+01  -2.6482717e+01   4.0000000e+02   6.1874878e-01  -8.1936264e-01   9.9286494e-01
   1.8134125e+01  -2.6603401e+01   4.0000000e+02   5.0267506e-01  -8.6625681e-01   9.0984917e-01
   1.8188338e+01  -2.6722654e+01   4.0000000e+02   3.8661099e-01  -9.1088658e-01   8.3305222e-01
   1.8246685e+01  -2.6840364e+01   4.0000000e+02   2.7057934e-01  -9.5298659e-01   7.6232176e-01
   1.8309121e+01  -2.6956416e+01   4.0000000e+02   1.5450567e-01  -9.9224810e-01   6.9750062e-01
   1.8375601e+01  -2.7070700e+01   4.0000000e+02   3.8241690e-02  -1.0283307e+00   6.3842709e-01
   1.8446073e+01  -2.7183105e+01   4.0000000e+02  -7.8391173e-02  -1.0608678e+00   5.8494738e-01
   1.8520480e+01  -2.7293523e+01   4.0000000e+02  -1.9556618e-01  -1.0894840e+00   5.3691641e-01
   1.8598764e+01  -2.7401844e+01   4.0000000e+02  -3.1340934e-01  -1.1138200e+00   4.9419274e-01
   1.8680860e+01  -2.7507965e+01   4.0000000e+02  -4.3197108e-01  -1.1335455e+00   4.5664109e-01
   1.8766698e+01  -2.7611781e+01   4.0000000e+02  -5.5119059e-01  -1.1483841e+00   4.2412214e-01
   1.8856206e+01  -2.7713190e+01   4.0000000e+02  -6.7088218e-01  -1.1581316e+00   3.9648245e-01
   1.8949307e+01  -2.7812092e+01   4.0000000e+02  -7.9072479e-01  -1.1626658e+00   3.7354859e-01
   1.9045919e+01  -2.7908389e+01   4.0000000e+02  -9.1026415e-01  -1.1619538e+00   3.5512016e-01
   1.9145956e+01  -2.8001987e+01   4.0000000e+02  -1.0289275e+00  -1.1560512e+00   3.4096670e-01
   1.9249328e+01  -2.8092791e+01   4.0000000e+02  -1.1460414e+00  -1.1450970e+00   3.3082440e-01
   1.9355941e+01  -2.8180711e+01   4.0000000e+02  -1.2608656e+00  -1.1292974e+00   3.2440605e-01
   1.9465698e+01  -2.8265659e+01   4.0000000e+02  -1.3726237e+00  -1.1089092e+00   3.2140878e-01
   1.9578496e+01  -2.8347550e+01   4.0000000e+02  -1.4805365e+00  -1.0842168e+00   3.2153287e-01
   1.9694230e+01  -2.8426301e+01   4.0000000e+02  -1.5838563e+00  -1.0555105e+00   3.2449616e-01
   1.9812791e+01  -2.8501834e+01   4.0000000e+02  -1.6818948e+00  -1.0230625e+00   3.3006018e-01
   1.9934064e+01  -2.8574071e+01   4.0000000e+02  -1.7740419e+00  -9.8710954e-01   3.3804607e-01
   2.0057933e+01  -2.8642939e+01   4.0000000e+02  -1.8597851e+00  -9.4783558e-01   3.4835552e-01
   2.0184280e+01  -2.8708368e+01   4.0000000e+02  -1.9387147e+00  -9.0536206e-01   3.6098401e-01
   2.0312979e+01  -2.8770292e+01   4.0000000e+02  -2.0105206e+00  -8.5974459e-01   3.7603558e-01
   2.0443904e+01  -2.8828647e+01   4.0000000e+02  -2.0749892e+00  -8.1097603e-01   3.9371715e-01
   2.0576927e+01  -2.8883373e+01   4.0000000e+02  -2.1319914e+00  -7.5899434e-01   4.1433962e-01
   2.0711915e+01  -2.8934415e+01   4.0000000e+02  -2.1814681e+00  -7.0369799e-01   4.3831161e-01
   2.0848732e+01  -2.8981720e+01   4.0000000e+02  -2.2234163e+00  -6.4496686e-01   4.6611762e-01
   2.0987242e+01  -2.9025238e+01   4.0000000e+02  -2.2578768e+00  -5.8268455e-01   4.9829861e-01
   2.1127305e+01  -2.9064927e+01   4.0000000e+02  -2.2849230e+00  -5.1676550e-01   5.3543954e-01
   2.1268778e+01  -2.9100743e+01   4.0000000e+02  -2.3046548e+00  -4.4718573e-01   5.7812485e-01
   2.1411518e+01  -2.9132651e+01   4.0000000e+02  -2.3171975e+00  -3.7400771e-01   6.2693046e-01
   2.1555379e+01  -2.9160617e+01   4.0000000e+02  -2.3227039e+00  -2.9740994e-01   6.8238156e-01
   2.1700213e+01  -2.9184612e+01   4.0000000e+02  -2.3213621e+00  -2.1770896e-01   7.4493054e-01
   2.1845873e+01  -2.9204611e+01   4.0000000e+02  -2.3134059e+00  -1.3537489e-01   8.1492694e-01
   2.1992207e+01  -2.9220594e+01   4.0000000e+02  -2.2991268e+00  -5.1044014e-02   8.9258997e-01
   2.2139067e+01  -2.9232544e+01   4.0000000e+02  -2.2788868e+00   3.4487185e-02   9.7798099e-01
   2.2286299e+01  -2.9240449e+01   4.0000000e+02  -2.2531301e+00   1.2026787e-01   1.0709804e+00
   2.2433751e+01  -2.9244300e+01   4.0000000e+02  -2.2223900e+00   2.0522121e-01   1.1712689e+00
   2.2581273e+01  -2.9244093e+01   4.0000000e+02  -2.1872913e+00   2.8817825e-01   1.2783203e+00
   2.2728710e+01  -2.9239829e+01   4.0000000e+02  -2.1485479e+00   3.6791726e-01   1.3913937e+00
   2.2875911e+01  -2.9231512e+01   4.0000000e+02  -2.1069527e+00   4.4321951e-01   1.5095432e+00
   2.3022724e+01  -2.9219151e+01   4.0000000e+02  -2.0633610e+00   5.1291900e-01   1.6316345e+00
   2.3168997e+01  -2.9202758e+01   4.0000000e+02  -2.0186706e+00   5.7595604e-01   1.7563711e+00
   2.3314579e+01  -2.9182350e+01   4.0000000e+02  -1.9737945e+00   6.3142439e-01   1.8823341e+00
   2.3459321e+01  -2.9157949e+01   4.0000000e+02  -1.9296328e+00   6.7861024e-01   2.0080271e+00
   2.3603074e+01  -2.9129581e+01   4.0000000e+02  -1.8870465e+00   7.1701982e-01   2.1319204e+00
   2.3745692e+01  -2.9097273e+01   4.0000000e+02  -1.8468317e+00   7.4639650e-01   2.2524999e+00
   2.3887028e+01  -2.9061061e+01   4.0000000e+02  -1.8096947e+00   7.6671831e-01   2.3683177e+00
   2.4026939e+01  -2.9020980e+01   4.0000000e+02  -1.7762385e+00   7.7819268e-01   2.4780274e+00
   2.4165283e+01  -2.8977074e+01   4.0000000e+02  -1.7469469e+00   7.8123019e-01   2.5804238e+00
   2.4301920e+01  -2.8929386e+01   4.0000000e+02  -1.7221854e+00   7.7642043e-01   2.6744582e+00
   2.4436714e+01  -2.8877967e+01   4.0000000e+02  -1.7021949e+00   7.6449287e-01   2.7592626e+00
   2.4569529e+01  -2.8822868e+01   4.0000000e+02  -1.6871060e+00   7.4628522e-01   2.8341433e+00
   2.5284045e+01  -2.8598997e+01   4.0000000e+02  -1.5678542e+00   4.9701876e-01   3.1778905e+00
   2.5402001e+01  -2.8523370e+01   4.0000000e+02  -1.5807370e+00   4.5901905e-01   3.1845021e+00
   2.5517216e+01  -2.8444644e+01   4.0000000e+02  -1.5974499e+00   4.2121279e-01   3.1814061e+00
   2.5629585e+01  -2.8362894e+01   4.0000000e+02  -1.6177311e+00   3.8426327e-01   3.1689515e+00
   2.5739012e+01  -2.8278198e+01   4.0000000e+02  -1.6413404e+00   3.4875027e-01   3.1475466e+00
   2.5845402e+01  -2.8190634e+01   4.0000000e+02  -1.6680730e+00   3.1516985e-01   3.1176380e+00
   2.5948661e+01  -2.8100286e+01   4.0000000e+02  -1.6977598e+00   2.8392648e-01   3.0796995e+00
   2.6048704e+01  -2.8007237e+01   4.0000000e+02  -1.7302713e+00   2.5532676e-01   3.0342113e+00
   2.6145445e+01  -2.7911575e+01   4.0000000e+02  -1.7655121e+00   2.2958163e-01   2.9816420e+00
   2.6238805e+01  -2.7813389e+01   4.0000000e+02  -1.8034126e+00   2.0680310e-01   2.9224272e+00
   2.6328707e+01  -2.7712769e+01   4.0000000e+02  -1.8439161e+00   1.8701124e-01   2.8569482e+00
   2.6415077e+01  -2.7609809e+01   4.0000000e+02  -1.8869583e+00   1.7013902e-01   2.7855176e+00
   2.6497849e+01  -2.7504604e+01   4.0000000e+02  -1.9324458e+00   1.5604058e-01   2.7083649e+00
   2.6576956e+01  -2.7397250e+01   4.0000000e+02  -1.9802361e+00   1.4451036e-01   2.6256270e+00
   2.6652337e+01  -2.7287846e+01   4.0000000e+02  -2.0301124e+00   1.3529326e-01   2.5373532e+00
   2.6723936e+01  -2.7176491e+01   4.0000000e+02  -2.0817668e+00   1.2810307e-01   2.4435109e+00
   2.6791700e+01  -2.7063287e+01   4.0000000e+02  -2.1347869e+00   1.2263920e-01   2.3440047e+00
   2.6855579e+01  -2.6948337e+01   4.0000000e+02  -2.1886525e+00   1.1860247e-01   2.2386983e+00
   2.6915529e+01  -2.6831743e+01   4.0000000e+02  -2.2427408e+00   1.1570619e-01   2.1274408e+00
   2.6971508e+01  -2.6713612e+01   4.0000000e+02  -2.2963383e+00   1.1368581e-01   2.0101013e+00
   2.7023479e+01  -2.6594048e+01   4.0000000e+02  -2.3486680e+00   1.1230426e-01   1.8865884e+00
   2.7071409e+01  -2.6473160e+01   4.0000000e+02  -2.3989164e+00   1.1135137e-01   1.7568834e+00
   2.7115268e+01  -2.6351054e+01   4.0000000e+02  -2.4462731e+00   1.1064327e-01   1.6210467e+00
   2.7155030e+01  -2.6227838e+01   4.0000000e+02  -2.4899654e+00   1.1001452e-01   1.4792326e+00
   2.7190675e+01  -2.6103623e+01   4.0000000e+02  -2.5292936e+00   1.0930857e-01   1.3316928e+00
   2.7222184e+01  -2.5978518e+01   4.0000000e+02  -2.5636651e+00   1.0837123e-01   1.1787581e+00
   2.7249543e+01  -2.5852632e+01   4.0000000e+02  -2.5926158e+00   1.0703765e-01   1.0208280e+00
   2.7272741e+01  -2.5726075e+01   4.0000000e+02  -2.6158247e+00   1.0512334e-01   8.5835047e-01
   2.7291773e+01  -2.5598959e+01   4.0000000e+02  -2.6331165e+00   1.0241426e-01   6.9180245e-01
   2.7306634e+01  -2.5471393e+01   4.0000000e+02  -2.6444552e+00   9.8663064e-02   5.2165638e-01
   2.7317326e+01  -2.5343488e+01   4.0000000e+02  -2.6499251e+00   9.3581709e-02   3.4837171e-01
   2.7323852e+01  -2.5215355e+01   4.0000000e+02  -2.6497045e+00   8.6842888e-02   1.7237390e-01
   2.7326221e+01  -2.5087105e+01   4.0000000e+02  -2.6440330e+00   7.8079882e-02  -5.9498505e-03
   2.7324443e+01  -2.4958846e+01   4.0000000e+02  -2.6331749e+00   6.6892892e-02  -1.8625725e-01
   2.7318532e+01  -2.4830689e+01   4.0000000e+02  -2.6173832e+00   5.2855939e-02  -3.6823118e-01
   2.7308508e+01  -2.4702744e+01   4.0000000e+02  -2.5968668e+00   3.5526481e-02  -5.5156652e-01
   2.7294390e+01  -2.4575119e+01   4.0000000e+02  -2.5717628e+00   1.4459411e-02  -7.3595225e-01
   2.7276203e+01  -2.4447922e+01   4.0000000e+02  -2.5421198e+00  -1.0780620e-02  -9.2103550e-01
   2.7253974e+01  -2.4321261e+01   4.0000000e+02  -2.5078902e+00  -4.0602935e-02  -1.1063943e+00
   2.7227735e+01  -2.4195243e+01   4.0000000e+02  -2.4689355e+00  -7.5376071e-02  -1.2915087e+00
   2.7197519e+01  -2.4069973e+01   4.0000000e+02  -2.4250405e+00  -1.1541246e-01  -1.4757409e+00
   2.7163362e+01  -2.3945558e+01   4.0000000e+02  -2.3759403e+00  -1.6095374e-01  -1.6583135e+00
   2.7125304e+01  -2.3822100e+01   4.0000000e+02  -2.3213518e+00  -2.1216182e-01  -1.8383117e+00
   2.7083388e+01  -2.3699702e+01   4.0000000e+02  -2.2610117e+00  -2.6910820e-01  -2.0146817e+00
   2.7037658e+01  -2.3578467e+01   4.0000000e+02  -2.1947129e+00  -3.3176976e-01  -2.1862497e+00
   2.6988164e+01  -2.3458495e+01   4.0000000e+02  -2.1223399e+00  -4.0002978e-01  -2.3517488e+00
   2.6934955e+01  -2.3339886e+01   4.0000000e+02  -2.0438946e+00  -4.7368129e-01  -2.5098528e+00
   2.6878085e+01  -2.3222737e+01   4.0000000e+02  -1.9595183e+00  -5.5243664e-01  -2.6592141e+00
   2.6817610e+01  -2.3107144e+01   4.0000000e+02  -1.8695023e+00  -6.3593840e-01  -2.7985019e+00
   2.6753589e+01  -2.2993204e+01   4.0000000e+02  -1.7742908e+00  -7.2377192e-01  -2.9264369e+00
   2.6686081e+01  -2.2881009e+01   4.0000000e+02  -1.6744709e+00  -8.1548467e-01  -3.0418311e+00
   2.6615151e+01  -2.2770651e+01   4.0000000e+02  -1.5707652e+00  -9.1059594e-01  -3.1436079e+00
   2.6540863e+01  -2.2662220e+01   4.0000000e+02  -1.4640099e+00  -1.0086127e+00  -3.2308272e+00
   2.6463287e+01  -2.2555805e+01   4.0000000e+02  -1.3551387e+00  -1.1090368e+00  -3.3026982e+00
   2.6382491e+01  -2.2451492e+01   4.0000000e+02  -1.2451554e+00  -1.2113757e+00  -3.3585925e+00
   2.6298547e+01  -2.2349366e+01   4.0000000e+02  -1.1351162e+00  -1.3151437e+00  -3.3980489e+00
   2.6211531e+01  -2.2249510e+01   4.0000000e+02  -1.0261076e+00  -1.4198635e+00  -3.4207793e+00
   2.6121518e+01  -2.2152005e+01   4.0000000e+02  -9.1922155e-01  -1.5250696e+00  -3.4266713e+00
   2.6028587e+01  -2.2056929e+01   4.0000000e+02  -8.1553731e-01  -1.6303061e+00  -3.4157914e+00
   2.5932816e+01  -2.1964359e+01   4.0000000e+02  -7.1609922e-01  -1.7351298e+00  -3.3883841e+00
   2.5834289e+01  -2.1874369e+01   4.0000000e+02  -6.2189900e-01  -1.8391108e+00  -3.3448747e+00
   2.5733089e+01  -2.1787033e+01   4.0000000e+02  -5.3385357e-01  -1.9418409e+00  -3.2858630e+00
   2.5629301e+01  -2.1702420e+01   4.0000000e+02  -4.5278440e-01  -2.0429435e+00  -3.2121181e+00
   2.5523013e+01  -2.1620598e+01   4.0000000e+02  -3.7940095e-01  -2.1420822e+00  -3.1245661e+00
   2.5414312e+01  -2.1541632e+01   4.0000000e+02  -3.1428070e-01  -2.2389773e+00  -3.0242694e+00
   2.5303289e+01  -2.1465587e+01   4.0000000e+02  -2.5785691e-01  -2.3334153e+00  -2.9124052e+00
   2.5190035e+01  -2.1392522e+01   4.0000000e+02  -2.1040316e-01  -2.4252654e+00  -2.7902294e+00
   2.5074643e+01  -2.1322496e+01   4.0000000e+02  -1.7202866e-01  -2.5144850e+00  -2.6590402e+00
   2.4957208e+01  -2.1255564e+01   4.0000000e+02  -1.4267459e-01  -2.6011250e+00  -2.5201341e+00
   2.4837825e+01  -2.1191781e+01   4.0000000e+02  -1.2211831e-01  -2.6853285e+00  -2.3747584e+00
   2.4716590e+01  -2.1131197e+01   4.0000000e+02  -1.0998295e-01  -2.7673207e+00  -2.2240633e+00
   2.4593602e+01  -2.1073860e+01   4.0000000e+02  -1.0575417e-01  -2.8473905e+00  -2.0690616e+00
   2.4468959e+01  -2.1019816e+01   4.0000000e+02  -1.0880143e-01  -2.9258685e+00  -1.9105861e+00
   2.4342761e+01  -2.0969108e+01   4.0000000e+02  -1.1840397e-01  -3.0030949e+00  -1.7492630e+00
   2.4215110e+01  -2.0921775e+01   4.0000000e+02  -1.3377934e-01  -3.0793851e+00  -1.5854940e+00
   2.4086107e+01  -2.0877856e+01   4.0000000e+02  -1.5411229e-01  -3.1549948e+00  -1.4194479e+00
   2.3955855e+01  -2.0837385e+01   4.0000000e+02  -1.7858315e-01  -3.2300825e+00  -1.2510707e+00
   2.3824456e+01  -2.0800394e+01   4.0000000e+02  -2.0639285e-01  -3.3046790e+00  -1.0801030e+00
   2.3692016e+01  -2.0766913e+01   4.0000000e+02  -2.3678265e-01  -3.3786570e+00  -9.0611797e-01
   2.3558639e+01  -2.0736969e+01   4.0000000e+02  -2.6905027e-01  -3.4517151e+00  -7.2855454e-01
   2.3424429e+01  -2.0710584e+01   4.0000000e+02  -3.0255951e-01  -3.5233653e+00  -5.4676780e-01
   2.3289494e+01  -2.0687779e+01   4.0000000e+02  -3.3674155e-01  -3.5929299e+00  -3.6008661e-01
   2.3153938e+01  -2.0668574e+01   4.0000000e+02  -3.7109410e-01  -3.6595551e+00  -1.6785546e-01
   2.3017869e+01  -2.0652982e+01   4.0000000e+02  -4.0517483e-01  -3.7222230e+00   3.0502835e-02
   2.2881394e+01  -2.0641017e+01   4.0000000e+02  -4.3858945e-01  -3.7797838e+00   2.3544671e-01
   2.2744620e+01  -2.0632688e+01   4.0000000e+02  -4.7098064e-01  -3.8309888e+00   4.4727278e-01
   2.2607654e+01  -2.0628000e+01   4.0000000e+02  -5.0201408e-01  -3.8745322e+00   6.6608198e-01
   2.2470603e+01  -2.0626959e+01   4.0000000e+02  -5.3136297e-01  -3.9090992e+00   8.9175574e-01
   2.2333575e+01  -2.0629565e+01   4.0000000e+02  -5.5869790e-01  -3.9334136e+00   1.1239385e+00
   2.2196678e+01  -2.0635815e+01   4.0000000e+02  -5.8367572e-01  -3.9462906e+00   1.3620355e+00
   2.2060019e+01  -2.0645705e+01   4.0000000e+02  -6.0593125e-01  -3.9466867e+00   1.6052215e+00
   2.1923705e+01  -2.0659227e+01   4.0000000e+02  -6.2507369e-01  -3.9337458e+00   1.8524558e+00
   2.1787844e+01  -2.0676371e+01   4.0000000e+02  -6.4068415e-01  -3.9068403e+00   2.1025074e+00
   2.1652541e+01  -2.0697122e+01   4.0000000e+02  -6.5231946e-01  -3.8656025e+00   2.3539968e+00
   2.1517904e+01  -2.0721465e+01   4.0000000e+02  -6.5951332e-01  -3.8099490e+00   2.6054288e+00
   2.1384039e+01  -2.0749379e+01   4.0000000e+02  -6.6178718e-01  -3.7400880e+00   2.8552459e+00
   2.1251050e+01  -2.0780844e+01   4.0000000e+02  -6.5865553e-01  -3.6565160e+00   3.1018784e+00
   2.1119044e+01  -2.0815834e+01   4.0000000e+02  -6.4964016e-01  -3.5600023e+00   3.3437794e+00
   2.0988125e+01  -2.0854321e+01   4.0000000e+02  -6.3428116e-01  -3.4515546e+00   3.5794780e+00
   2.0858395e+01  -2.0896275e+01   4.0000000e+02  -6.1215020e-01  -3.3323770e+00   3.8076101e+00
   2.0729960e+01  -2.0941663e+01   4.0000000e+02  -5.8286553e-01  -3.2038249e+00   4.0269325e+00
   2.0602920e+01  -2.0990449e+01   4.0000000e+02  -5.4610826e-01  -3.0673396e+00   4.2363507e+00
   2.0477377e+01  -2.1042593e+01   4.0000000e+02  -5.0163868e-01  -2.9244000e+00   4.4349077e+00
   2.0353432e+01  -2.1098055e+01   4.0000000e+02  -4.4930866e-01  -2.7764671e+00   4.6217811e+00
   2.0231184e+01  -2.1156791e+01   4.0000000e+02  -3.8907967e-01  -2.6249363e+00   4.7962681e+00
   2.0110731e+01  -2.1218753e+01   4.0000000e+02  -3.2103572e-01  -2.4711024e+00   4.9577638e+00
   1.9992172e+01  -2.1283893e+01   4.0000000e+02  -2.4538853e-01  -2.3161370e+00   5.1057392e+00
   1.9875602e+01  -2.1352159e+01   4.0000000e+02  -1.6248655e-01  -2.1610687e+00   5.2397277e+00
   1.9761115e+01  -2.1423495e+01   4.0000000e+02  -7.2815116e-02  -2.0067836e+00   5.3593073e+00
   1.9648807e+01  -2.1497846e+01   4.0000000e+02   2.3015625e-02  -1.8540354e+00   5.4640900e+00
   1.9538769e+01  -2.1575152e+01   4.0000000e+02   1.2427557e-01  -1.7034497e+00   5.5537267e+00
   1.9431092e+01  -2.1655351e+01   4.0000000e+02   2.3013521e-01  -1.5555480e+00   5.6279067e+00
   1.9325865e+01  -2.1738378e+01   4.0000000e+02   3.3968574e-01  -1.4107656e+00   5.6863681e+00
   1.9223177e+01  -2.1824168e+01   4.0000000e+02   4.5196691e-01  -1.2694760e+00   5.7289079e+00
   1.9123113e+01  -2.1912651e+01   4.0000000e+02   5.6598548e-01  -1.1320058e+00   5.7553991e+00
   1.9025759e+01  -2.2003757e+01   4.0000000e+02   6.8074575e-01  -9.9866100e-01   5.7657989e+00
   1.8931196e+01  -2.2097411e+01   4.0000000e+02   7.9526478e-01  -8.6973619e-01   5.7601660e+00
   1.8839507e+01  -2.2193539e+01   4.0000000e+02   9.0859832e-01  -7.4553879e-01   5.7386639e+00
   1.8750770e+01  -2.2292062e+01   4.0000000e+02   1.0198468e+00  -6.2639081e-01   5.7015737e+00
   1.8665063e+01  -2.2392902e+01   4.0000000e+02   1.1281722e+00  -5.1264483e-01   5.6492928e+00
   1.8582461e+01  -2.2495976e+01   4.0000000e+02   1.2327952e+00  -4.0468398e-01   5.5823406e+00
   1.8503037e+01  -2.2601201e+01   4.0000000e+02   1.3330028e+00  -3.0292470e-01   5.5013529e+00
   1.8426863e+01  -2.2708492e+01   4.0000000e+02   1.4281439e+00  -2.0781465e-01   5.4070790e+00
   1.8354007e+01  -2.2817760e+01   4.0000000e+02   1.5176235e+00  -1.1982001e-01   5.3003761e+00
   1.8284537e+01  -2.2928917e+01   4.0000000e+02   1.6009038e+00  -3.9420139e-02   5.1821941e+00
   1.8218518e+01  -2.3041873e+01   4.0000000e+02   1.6774958e+00   3.2913344e-02   5.0535651e+00
   1.8156010e+01  -2.3156533e+01   4.0000000e+02   1.7469522e+00   9.6739639e-02   4.9155913e+00
   1.8097074e+01  -2.3272805e+01   4.0000000e+02   1.8088713e+00   1.5165904e-01   4.7694164e+00
   1.8041768e+01  -2.3390593e+01   4.0000000e+02   1.8628877e+00   1.9734257e-01   4.6162142e+00
   1.7990146e+01  -2.3509799e+01   4.0000000e+02   1.9086720e+00   2.3355433e-01   4.4571652e+00
   1.7942261e+01  -2.3630324e+01   4.0000000e+02   1.9459309e+00   2.6016530e-01   4.2934339e+00
   1.7898162e+01  -2.3752070e+01   4.0000000e+02   1.9744067e+00   2.7717195e-01   4.1261477e+00
   1.7857895e+01  -2.3874935e+01   4.0000000e+02   1.9938763e+00   2.8470630e-01   3.9563872e+00
   1.7821506e+01  -2.3998817e+01   4.0000000e+02   2.0041570e+00   2.8303391e-01   3.7851690e+00
   1.7789035e+01  -2.4123612e+01   4.0000000e+02   2.0051070e+00   2.7256108e-01   3.6134411e+00
   1.7760520e+01  -2.4249215e+01   4.0000000e+02   1.9966346e+00   2.5381966e-01   3.4420787e+00
   1.7735997e+01  -2.4375522e+01   4.0000000e+02   1.9787059e+00   2.2745139e-01   3.2718826e+00
   1.7715499e+01  -2.4502426e+01   4.0000000e+02   1.9513542e+00   1.9419172e-01   3.1035896e+00
   1.7699054e+01  -2.4629820e+01   4.0000000e+02   1.9146902e+00   1.5484768e-01   2.9378745e+00
   1.7686689e+01  -2.4757596e+01   4.0000000e+02   1.8689145e+00   1.1026671e-01   2.7753575e+00
   1.7678427e+01  -2.4885645e+01   4.0000000e+02   1.8143246e+00   6.1313915e-02   2.6166101e+00
   1.7674288e+01  -2.5013859e+01   4.0000000e+02   1.7513203e+00   8.8432560e-03   2.4621562e+00
   1.7674287e+01  -2.5142128e+01   4.0000000e+02   1.6804045e+00  -4.6322919e-02   2.3124774e+00
   1.7678438e+01  -2.5270341e+01   4.0000000e+02   1.6021796e+00  -1.0342135e-01   2.1680097e+00
   1.7686750e+01  -2.5398390e+01   4.0000000e+02   1.5173323e+00  -1.6176085e-01   2.0291367e+00
   1.7699230e+01  -2.5526163e+01   4.0000000e+02   1.4266215e+00  -2.2073536e-01   1.8961922e+00
   1.7715881e+01  -2.5653549e+01   4.0000000e+02   1.3308519e+00  -2.7982908e-01   1.7694505e+00
   1.7736700e+01  -2.5780439e+01   4.0000000e+02   1.2308462e+00  -3.3861366e-01   1.6491220e+00
   1.7761684e+01  -2.5906722e+01   4.0000000e+02   1.1274203e+00  -3.9674851e-01   1.5353519e+00
   1.7790825e+01  -2.6032286e+01   4.0000000e+02   1.0213520e+00  -4.5396310e-01   1.4282200e+00
   1.7824110e+01  -2.6157023e+01   4.0000000e+02   9.1334877e-01  -5.1004191e-01   1.3277382e+00
   1.7861523e+01  -2.6280823e+01   4.0000000e+02   8.0402862e-01  -5.6480681e-01   1.2338590e+00
   1.7903046e+01  -2.6403575e+01   4.0000000e+02   6.9390003e-01  -6.1809853e-01   1.1464807e+00
   1.7948655e+01  -2.6525172e+01   4.0000000e+02   5.8334441e-01  -6.6975268e-01   1.0654567e+00
   1.7998322e+01  -2.6645506e+01   4.0000000e+02   4.7261628e-01  -7.1958500e-01   9.9060933e-01
   1.8052016e+01  -2.6764468e+01   4.0000000e+02   3.6184704e-01  -7.6738005e-01   9.2174126e-01
   1.8109704e+01  -2.6881953e+01   4.0000000e+02   2.5105261e-01  -8.1288451e-01   8.5864676e-01
   1.8171344e+01  -2.6997854e+01   4.0000000e+02   1.4016009e-01  -8.5579946e-01   8.0113017e-01
   1.8236896e+01  -2.7112068e+01   4.0000000e+02   2.9028454e-02  -8.9579606e-01   7.4900690e-01
   1.8306311e+01  -2.7224492e+01   4.0000000e+02  -8.2514145e-02  -9.3251627e-01   7.0211865e-01
   1.8379539e+01  -2.7335022e+01   4.0000000e+02  -1.9463593e-01  -9.6559674e-01   6.6032920e-01
   1.8456526e+01  -2.7443559e+01   4.0000000e+02  -3.0747142e-01  -9.9468331e-01   6.2352518e-01
   1.8537213e+01  -2.7550003e+01   4.0000000e+02  -4.2108383e-01  -1.0194520e+00   5.9160990e-01
   1.8621536e+01  -2.7654256e+01   4.0000000e+02  -5.3544065e-01  -1.0396278e+00   5.6449375e-01
   1.8709430e+01  -2.7756224e+01   4.0000000e+02  -6.5039732e-01  -1.0550037e+00   5.4207996e-01
   1.8800824e+01  -2.7855811e+01   4.0000000e+02  -7.6568034e-01  -1.0654517e+00   5.2425290e-01
   1.8895644e+01  -2.7952925e+01   4.0000000e+02  -8.8089268e-01  -1.0709292e+00   5.1086625e-01
   1.8993812e+01  -2.8047477e+01   4.0000000e+02  -9.9552160e-01  -1.0714799e+00   5.0173466e-01
   1.9095245e+01  -2.8139378e+01   4.0000000e+02  -1.1089536e+00  -1.0672288e+00   4.9662750e-01
   1.9199858e+01  -2.8228542e+01   4.0000000e+02  -1.2205030e+00  -1.0583705e+00   4.9526903e-01
   1.9307562e+01  -2.8314886e+01   4.0000000e+02  -1.3294401e+00  -1.0451517e+00   4.9734672e-01
   1.9418263e+01  -2.8398328e+01   4.0000000e+02  -1.4350212e+00  -1.0278524e+00   5.0252251e-01
   1.9531865e+01  -2.8478790e+01   4.0000000e+02  -1.5365226e+00  -1.0067635e+00   5.1045065e-01
   1.9648269e+01  -2.8556195e+01   4.0000000e+02  -1.6332661e+00  -9.8216659e-01   5.2079625e-01
   1.9767369e+01  -2.8630471e+01   4.0000000e+02  -1.7246422e+00  -9.5431150e-01   5.3326531e-01
   1.9889061e+01  -2.8701547e+01   4.0000000e+02  -1.8101283e+00  -9.2340363e-01   5.4761574e-01
   2.0013234e+01  -2.8769354e+01   4.0000000e+02  -1.8892948e+00  -8.8959043e-01   5.6368430e-01
   2.0139775e+01  -2.8833829e+01   4.0000000e+02  -1.9618106e+00  -8.5295355e-01   5.8140466e-01
   2.0268567e+01  -2.8894909e+01   4.0000000e+02  -2.0274365e+00  -8.1351096e-01   6.0081025e-01
   2.0399494e+01  -2.8952536e+01   4.0000000e+02  -2.0860190e+00  -7.7121865e-01   6.2204270e-01
   2.0532431e+01  -2.9006654e+01   4.0000000e+02  -2.1374739e+00  -7.2598327e-01   6.4535071e-01
   2.0667257e+01  -2.9057212e+01   4.0000000e+02  -2.1817762e+00  -6.7767352e-01   6.7107956e-01
   2.0803844e+01  -2.9104160e+01   4.0000000e+02  -2.2189423e+00  -6.2614205e-01   6.9965674e-01
   2.0942063e+01  -2.9147453e+01   4.0000000e+02  -2.2490192e+00  -5.7124455e-01   7.3157804e-01
   2.1081784e+01  -2.9187049e+01   4.0000000e+02  -2.2720751e+00  -5.1286414e-01   7.6738385e-01
   2.1222873e+01  -2.9222910e+01   4.0000000e+02  -2.2881929e+00  -4.5093727e-01   8.0763896e-01
   2.1365196e+01  -2.9255000e+01   4.0000000e+02  -2.2974702e+00  -3.8547787e-01   8.5290360e-01
   2.1508616e+01  -2.9283290e+01   4.0000000e+02  -2.3000221e+00  -3.1660212e-01   9.0371801e-01
   2.1652996e+01  -2.9307750e+01   4.0000000e+02  -2.2959902e+00  -2.4454917e-01   9.6056175e-01
   2.1798196e+01  -2.9328358e+01   4.0000000e+02  -2.2855524e+00  -1.6969903e-01   1.0238440e+00
   2.1944077e+01  -2.9345093e+01   4.0000000e+02  -2.2689380e+00  -9.2581443e-02   1.0938654e+00
   2.2090497e+01  -2.9357939e+01   4.0000000e+02  -2.2464405e+00  -1.3880784e-02   1.1707990e+00
   2.2237314e+01  -2.9366883e+01   4.0000000e+02  -2.2184315e+00   6.5572278e-02   1.2546643e+00
   2.2384387e+01  -2.9371917e+01   4.0000000e+02  -2.1853695e+00   1.4481764e-01   1.3453115e+00
   2.2531571e+01  -2.9373035e+01   4.0000000e+02  -2.1478083e+00   2.2279039e-01   1.4423982e+00
   2.2678725e+01  -2.9370237e+01   4.0000000e+02  -2.1063933e+00   2.9835991e-01   1.5453929e+00
   2.2825705e+01  -2.9363525e+01   4.0000000e+02  -2.0618593e+00   3.7037018e-01   1.6535632e+00
   2.2972370e+01  -2.9352906e+01   4.0000000e+02  -2.0150147e+00   4.3768923e-01   1.7659947e+00
   2.3118576e+01  -2.9338390e+01   4.0000000e+02  -1.9667260e+00   4.9925561e-01   1.8816014e+00
   2.3264182e+01  -2.9319991e+01   4.0000000e+02  -1.9178919e+00   5.5412679e-01   1.9991603e+00
   2.3409047e+01  -2.9297728e+01   4.0000000e+02  -1.8694176e+00   6.0151767e-01   2.1173455e+00
   2.3553033e+01  -2.9271622e+01   4.0000000e+02  -1.8221870e+00   6.4083438e-01   2.2347692e+00
   2.3695999e+01  -2.9241698e+01   4.0000000e+02  -1.7770373e+00   6.7169316e-01   2.3500222e+00
   2.3837809e+01  -2.9207986e+01   4.0000000e+02  -1.7347303e+00   6.9393059e-01   2.4617272e+00
   2.3978328e+01  -2.9170519e+01   4.0000000e+02  -1.6959345e+00   7.0760119e-01   2.5685737e+00
   2.4117420e+01  -2.9129332e+01   4.0000000e+02  -1.6612121e+00   7.1296535e-01   2.6693511e+00
   2.4254955e+01  -2.9084465e+01   4.0000000e+02  -1.6310041e+00   7.1046551e-01   2.7629864e+00
   2.4390802e+01  -2.9035963e+01   4.0000000e+02  -1.6056305e+00   7.0069863e-01   2.8485569e+00
   2.4524833e+01  -2.8983872e+01   4.0000000e+02  -1.5852930e+00   6.8438614e-01   2.9253014e+00
   2.4656923e+01  -2.8928242e+01   4.0000000e+02  -1.5700812e+00   6.6233919e-01   2.9926258e+00
   2.4786949e+01  -2.8869127e+01   4.0000000e+02  -1.5599837e+00   6.3542700e-01   3.0500980e+00
   2.4914790e+01  -2.8806583e+01   4.0000000e+02  -1.5549042e+00   6.0454868e-01   3.0974372e+00
   2.5040329e+01  -2.8740671e+01   4.0000000e+02  -1.5546746e+00   5.7060511e-01   3.1345056e+00
   2.5163451e+01  -2.8671454e+01   4.0000000e+02  -1.5590759e+00   5.3447954e-01   3.1612905e+00
   2.5837641e+01  -2.8373015e+01   4.0000000e+02  -1.5288170e+00   2.4107150e-01   3.2472717e+00
   2.5944205e+01  -2.8285289e+01   4.0000000e+02  -1.5567188e+00   2.0724340e-01   3.2159722e+00
   2.6047713e+01  -2.8194849e+01   4.0000000e+02  -1.5875638e+00   1.7599863e-01   3.1774138e+00
   2.6148081e+01  -2.8101775e+01   4.0000000e+02  -1.6212292e+00   1.4764027e-01   3.1320805e+00
   2.6245230e+01  -2.8006149e+01   4.0000000e+02  -1.6576345e+00   1.2237415e-01   3.0804417e+00
   2.6339083e+01  -2.7908057e+01   4.0000000e+02  -1.6967333e+00   1.0030941e-01   3.0229309e+00
   2.6429569e+01  -2.7807585e+01   4.0000000e+02  -1.7385011e+00   8.1459986e-02   2.9599233e+00
   2.6516617e+01  -2.7704820e+01   4.0000000e+02  -1.7829188e+00   6.5754136e-02   2.8917149e+00
   2.6600162e+01  -2.7599852e+01   4.0000000e+02  -1.8299461e+00   5.3039179e-02   2.8185112e+00
   2.6680143e+01  -2.7492774e+01   4.0000000e+02  -1.8794983e+00   4.3095825e-02   2.7404173e+00
   2.6756501e+01  -2.7383677e+01   4.0000000e+02  -1.9314262e+00   3.5656887e-02   2.6574327e+00
   2.6829181e+01  -2.7272657e+01   4.0000000e+02  -1.9854882e+00   3.0420263e-02   2.5694654e+00
   2.6898132e+01  -2.7159809e+01   4.0000000e+02  -2.0413381e+00   2.7068451e-02   2.4763435e+00
   2.6963308e+01  -2.7045230e+01   4.0000000e+02  -2.0985139e+00   2.5282900e-02   2.3778417e+00
   2.7024665e+01  -2.6929018e+01   4.0000000e+02  -2.1564396e+00   2.4759832e-02   2.2737095e+00
   2.7082162e+01  -2.6811273e+01   4.0000000e+02  -2.2144342e+00   2.5219566e-02   2.1637048e+00
   2.7135765e+01  -2.6692094e+01   4.0000000e+02  -2.2717335e+00   2.6411385e-02   2.0476233e+00
   2.7185439e+01  -2.6571583e+01   4.0000000e+02  -2.3275174e+00   2.8119091e-02   1.9253289e+00
   2.7231156e+01  -2.6449842e+01   4.0000000e+02  -2.3809458e+00   3.0155457e-02   1.7967746e+00
   2.7272890e+01  -2.6326972e+01   4.0000000e+02  -2.4311978e+00   3.2359863e-02   1.6620132e+00
   2.7310620e+01  -2.6203078e+01   4.0000000e+02  -2.4775080e+00   3.4587700e-02   1.5212093e+00
   2.7344327e+01  -2.6078262e+01   4.0000000e+02  -2.5192057e+00   3.6703601e-02   1.3746239e+00
   2.7373997e+01  -2.5952629e+01   4.0000000e+02  -2.5557407e+00   3.8568237e-02   1.2226102e+00
   2.7399618e+01  -2.5826283e+01   4.0000000e+02  -2.5867066e+00   4.0030054e-02   1.0655872e+00
   2.7421182e+01  -2.5699329e+01   4.0000000e+02  -2.6118491e+00   4.0914447e-02   9.0401809e-01
   2.7438684e+01  -2.5571871e+01   4.0000000e+02  -2.6310659e+00   4.1016540e-02   7.3838189e-01
   2.7452124e+01  -2.5444014e+01   4.0000000e+02  -2.6443931e+00   4.0094448e-02   5.6915205e-01
   2.7461504e+01  -2.5315862e+01   4.0000000e+02  -2.6519833e+00   3.7867588e-02   3.9677161e-01
   2.7466828e+01  -2.5187521e+01   4.0000000e+02  -2.6540744e+00   3.4016162e-02   2.2164272e-01
   2.7468106e+01  -2.5059095e+01   4.0000000e+02  -2.6509535e+00   2.8182152e-02   4.4116947e-02
   2.7465348e+01  -2.4930688e+01   4.0000000e+02  -2.6429174e+00   1.9976713e-02  -1.3550309e-01
   2.7458571e+01  -2.4802405e+01   4.0000000e+02  -2.6302354e+00   8.9855875e-03  -3.1694682e-01
   2.7447792e+01  -2.4674347e+01   4.0000000e+02  -2.6131144e+00  -5.2190442e-03  -4.9996719e-01
   2.7433031e+01  -2.4546619e+01   4.0000000e+02  -2.5916734e+00  -2.3066965e-02  -6.8430168e-01
   2.7414313e+01  -2.4419322e+01   4.0000000e+02  -2.5659257e+00  -4.4978089e-02  -8.6965148e-01
   2.7391663e+01  -2.4292559e+01   4.0000000e+02  -2.5357739e+00  -7.1346094e-02  -1.0556446e+00
   2.7365113e+01  -2.4166431e+01   4.0000000e+02  -2.5010173e+00  -1.0252612e-01  -1.2418068e+00
   2.7334694e+01  -2.4041037e+01   4.0000000e+02  -2.4613683e+00  -1.3881928e-01  -1.4275422e+00
   2.7300442e+01  -2.3916477e+01   4.0000000e+02  -2.4164831e+00  -1.8045994e-01  -1.6121084e+00
   2.7262393e+01  -2.3792850e+01   4.0000000e+02  -2.3659958e+00  -2.2760464e-01  -1.7946162e+00
   2.7220590e+01  -2.3670253e+01   4.0000000e+02  -2.3095604e+00  -2.8032500e-01  -1.9740316e+00
   2.7175073e+01  -2.3548782e+01   4.0000000e+02  -2.2468880e+00  -3.3860250e-01  -2.1491969e+00
   2.7125890e+01  -2.3428533e+01   4.0000000e+02  -2.1777889e+00  -4.0232769e-01  -2.3188496e+00
   2.7073088e+01  -2.3309600e+01   4.0000000e+02  -2.1021988e+00  -4.7130503e-01  -2.4816637e+00
   2.7016717e+01  -2.3192075e+01   4.0000000e+02  -2.0202034e+00  -5.4526091e-01  -2.6362868e+00
   2.6956831e+01  -2.3076050e+01   4.0000000e+02  -1.9320518e+00  -6.2385356e-01  -2.7813766e+00
   2.6893483e+01  -2.2961615e+01   4.0000000e+02  -1.8381567e+00  -7.0668867e-01  -2.9156432e+00
   2.6826733e+01  -2.2848859e+01   4.0000000e+02  -1.7390929e+00  -7.9333201e-01  -3.0378791e+00
   2.6756638e+01  -2.2737870e+01   4.0000000e+02  -1.6355786e+00  -8.8332605e-01  -3.1469892e+00
   2.6683260e+01  -2.2628732e+01   4.0000000e+02  -1.5284597e+00  -9.7620286e-01  -3.2420121e+00
   2.6606664e+01  -2.2521530e+01   4.0000000e+02  -1.4186892e+00  -1.0714914e+00  -3.3221308e+00
   2.6526914e+01  -2.2416347e+01   4.0000000e+02  -1.3072995e+00  -1.1687281e+00  -3.3866850e+00
   2.6444079e+01  -2.2313262e+01   4.0000000e+02  -1.1953800e+00  -1.2674592e+00  -3.4351765e+00
   2.6358228e+01  -2.2212356e+01   4.0000000e+02  -1.0840541e+00  -1.3672408e+00  -3.4672687e+00
   2.6269433e+01  -2.2113705e+01   4.0000000e+02  -9.7445339e-01  -1.4676401e+00  -3.4827923e+00
   2.6177765e+01  -2.2017385e+01   4.0000000e+02  -8.6769701e-01  -1.5682340e+00  -3.4817422e+00
   2.6083302e+01  -2.1923469e+01   4.0000000e+02  -7.6487250e-01  -1.6686046e+00  -3.4642828e+00
   2.5986118e+01  -2.1832028e+01   4.0000000e+02  -6.6701090e-01  -1.7683466e+00  -3.4307440e+00
   2.5886293e+01  -2.1743133e+01   4.0000000e+02  -5.7507320e-01  -1.8670640e+00  -3.3816244e+00
   2.5783907e+01  -2.1656850e+01   4.0000000e+02  -4.8992572e-01  -1.9643830e+00  -3.3175863e+00
   2.5679040e+01  -2.1573246e+01   4.0000000e+02  -4.1232560e-01  -2.0599597e+00  -3.2394480e+00
   2.5571775e+01  -2.1492382e+01   4.0000000e+02  -3.4290163e-01  -2.1534935e+00  -3.1481737e+00
   2.5462197e+01  -2.1414322e+01   4.0000000e+02  -2.8214301e-01  -2.2447393e+00  -3.0448558e+00
   2.5350392e+01  -2.1339122e+01   4.0000000e+02  -2.3038210e-01  -2.3335252e+00  -2.9306877e+00
   2.5236446e+01  -2.1266841e+01   4.0000000e+02  -1.8779005e-01  -2.4197627e+00  -2.8069327e+00
   2.5120447e+01  -2.1197533e+01   4.0000000e+02  -1.5437043e-01  -2.5034562e+00  -2.6748863e+00
   2.5002485e+01  -2.1131250e+01   4.0000000e+02  -1.2996171e-01  -2.5847055e+00  -2.5358338e+00
   2.4882651e+01  -2.1068041e+01   4.0000000e+02  -1.1424429e-01  -2.6637031e+00  -2.3910033e+00
   2.4761035e+01  -2.1007955e+01   4.0000000e+02  -1.0675432e-01  -2.7407241e+00  -2.2415190e+00
   2.4637732e+01  -2.0951037e+01   4.0000000e+02  -1.0690261e-01  -2.8161049e+00  -2.0883635e+00
   2.4512833e+01  -2.0897328e+01   4.0000000e+02  -1.1399894e-01  -2.8902219e+00  -1.9323312e+00
   2.4386435e+01  -2.0846871e+01   4.0000000e+02  -1.2727936e-01  -2.9634551e+00  -1.7740131e+00
   2.4258631e+01  -2.0799701e+01   4.0000000e+02  -1.4593640e-01  -3.0361580e+00  -1.6137661e+00
   2.4129519e+01  -2.0755855e+01   4.0000000e+02  -1.6914713e-01  -3.1086169e+00  -1.4517203e+00
   2.3999195e+01  -2.0715366e+01   4.0000000e+02  -1.9610155e-01  -3.1810185e+00  -1.2877779e+00
   2.3867758e+01  -2.0678263e+01   4.0000000e+02  -2.2602580e-01  -3.2534152e+00  -1.1216392e+00
   2.3735304e+01  -2.0644575e+01   4.0000000e+02  -2.5820118e-01  -3.3257029e+00  -9.5282649e-01
   2.3601934e+01  -2.0614326e+01   4.0000000e+02  -2.9197653e-01  -3.3975967e+00  -7.8073357e-01
   2.3467746e+01  -2.0587540e+01   4.0000000e+02  -3.2677551e-01  -3.4686259e+00  -6.0466239e-01
   2.3332841e+01  -2.0564237e+01   4.0000000e+02  -3.6209720e-01  -3.5381293e+00  -4.2388077e-01
   2.3197319e+01  -2.0544433e+01   4.0000000e+02  -3.9751259e-01  -3.6052653e+00  -2.3766915e-01
   2.3061279e+01  -2.0528143e+01   4.0000000e+02  -4.3265515e-01  -3.6690307e+00  -4.5370812e-02
   2.2924824e+01  -2.0515380e+01   4.0000000e+02  -4.6720788e-01  -3.7282836e+00   1.5355395e-01
   2.2788054e+01  -2.0506154e+01   4.0000000e+02  -5.0089128e-01  -3.7817807e+00   3.5949575e-01
   2.2651071e+01  -2.0500470e+01   4.0000000e+02  -5.3344800e-01  -3.8282138e+00   5.7265337e-01
   2.2513977e+01  -2.0498334e+01   4.0000000e+02  -5.6462728e-01  -3.8662570e+00   7.9301089e-01
   2.2376871e+01  -2.0499747e+01   4.0000000e+02  -5.9417420e-01  -3.8946134e+00   1.0203240e+00
   2.2239857e+01  -2.0504707e+01   4.0000000e+02  -6.2181637e-01  -3.9120625e+00   1.2540991e+00
   2.2103036e+01  -2.0513212e+01   4.0000000e+02  -6.4725635e-01  -3.9175112e+00   1.4936102e+00
   2.1966508e+01  -2.0525255e+01   4.0000000e+02  -6.7016718e-01  -3.9100375e+00   1.7379067e+00
   2.1830376e+01  -2.0540826e+01   4.0000000e+02  -6.9018841e-01  -3.8889319e+00   1.9858296e+00
   2.1694740e+01  -2.0559915e+01   4.0000000e+02  -7.0692646e-01  -3.8537313e+00   2.2360550e+00
   2.1559701e+01  -2.0582506e+01   4.0000000e+02  -7.1995873e-01  -3.8042427e+00   2.4871247e+00
   2.1425359e+01  -2.0608584e+01   4.0000000e+02  -7.2883626e-01  -3.7405576e+00   2.7374974e+00
   2.1291814e+01  -2.0638128e+01   4.0000000e+02  -7.3309315e-01  -3.6630511e+00   2.9855932e+00
   2.1159165e+01  -2.0671117e+01   4.0000000e+02  -7.3225247e-01  -3.5723703e+00   3.2298460e+00
   2.1027513e+01  -2.0707526e+01   4.0000000e+02  -7.2583735e-01  -3.4694100e+00   3.4687428e+00
   2.0896954e+01  -2.0747327e+01   4.0000000e+02  -7.1338239e-01  -3.3552694e+00   3.7008753e+00
   2.0767587e+01  -2.0790492e+01   4.0000000e+02  -6.9444301e-01  -3.2312121e+00   3.9249573e+00
   2.0639509e+01  -2.0836986e+01   4.0000000e+02  -6.6861394e-01  -3.0986076e+00   4.1398501e+00
   2.0512816e+01  -2.0886777e+01   4.0000000e+02  -6.3553709e-01  -2.9588772e+00   4.3445711e+00
   2.0387604e+01  -2.0939826e+01   4.0000000e+02  -5.9492415e-01  -2.8134405e+00   4.5382850e+00
   2.0263968e+01  -2.0996093e+01   4.0000000e+02  -5.4656874e-01  -2.6636671e+00   4.7202942e+00
   2.0142001e+01  -2.1055537e+01   4.0000000e+02  -4.9036189e-01  -2.5108353e+00   4.8900194e+00
   2.0021796e+01  -2.1118113e+01   4.0000000e+02  -4.2630929e-01  -2.3561066e+00   5.0469724e+00
   1.9903445e+01  -2.1183773e+01   4.0000000e+02  -3.5454267e-01  -2.2005083e+00   5.1907341e+00
   1.9787039e+01  -2.1252469e+01   4.0000000e+02  -2.7532468e-01  -2.0449281e+00   5.3209352e+00
   1.9672667e+01  -2.1324148e+01   4.0000000e+02  -1.8905719e-01  -1.8901176e+00   5.4372405e+00
   1.9560418e+01  -2.1398757e+01   4.0000000e+02  -9.6273362e-02  -1.7367080e+00   5.5393396e+00
   1.9450379e+01  -2.1476239e+01   4.0000000e+02   2.3665466e-03  -1.5852247e+00   5.6269464e+00
   1.9342636e+01  -2.1556536e+01   4.0000000e+02   1.0609279e-01  -1.4361102e+00   5.6998022e+00
   1.9237273e+01  -2.1639587e+01   4.0000000e+02   2.1404269e-01  -1.2897437e+00   5.7576854e+00
   1.9134374e+01  -2.1725329e+01   4.0000000e+02   3.2528395e-01  -1.1464646e+00   5.8004213e+00
   1.9034020e+01  -2.1813697e+01   4.0000000e+02   4.3883880e-01  -1.0065872e+00   5.8278964e+00
   1.8936292e+01  -2.1904624e+01   4.0000000e+02   5.5370784e-01  -8.7042109e-01   5.8400684e+00
   1.8841268e+01  -2.1998041e+01   4.0000000e+02   6.6889262e-01  -7.3828010e-01   5.8369781e+00
   1.8749024e+01  -2.2093877e+01   4.0000000e+02   7.8341521e-01  -6.1049450e-01   5.8187572e+00
   1.8659637e+01  -2.2192059e+01   4.0000000e+02   8.9633450e-01  -4.8742307e-01   5.7856333e+00
   1.8573180e+01  -2.2292512e+01   4.0000000e+02   1.0067582e+00  -3.6945101e-01   5.7379354e+00
   1.8489724e+01  -2.2395159e+01   4.0000000e+02   1.1138513e+00  -2.5699486e-01   5.6760948e+00
   1.8409340e+01  -2.2499921e+01   4.0000000e+02   1.2168410e+00  -1.5050454e-01   5.6006444e+00
   1.8332096e+01  -2.2606718e+01   4.0000000e+02   1.3150198e+00  -5.0454788e-02   5.5122170e+00
   1.8258057e+01  -2.2715467e+01   4.0000000e+02   1.4077433e+00   4.2662812e-02   5.4115427e+00
   1.8187288e+01  -2.2826087e+01   4.0000000e+02   1.4944344e+00   1.2834576e-01   5.2994379e+00
   1.8119850e+01  -2.2938489e+01   4.0000000e+02   1.5745715e+00   2.0610283e-01   5.1768077e+00
   1.8055804e+01  -2.3052589e+01   4.0000000e+02   1.6476987e+00   2.7546288e-01   5.0446214e+00
   1.7995208e+01  -2.3168297e+01   4.0000000e+02   1.7134136e+00   3.3600072e-01   4.9039111e+00
   1.7938116e+01  -2.3285523e+01   4.0000000e+02   1.7713696e+00   3.8735744e-01   4.7557496e+00
   1.7884582e+01  -2.3404177e+01   4.0000000e+02   1.8212735e+00   4.2925385e-01   4.6012325e+00
   1.7834657e+01  -2.3524166e+01   4.0000000e+02   1.8628801e+00   4.6151370e-01   4.4414639e+00
   1.7788390e+01  -2.3645395e+01   4.0000000e+02   1.8959900e+00   4.8407683e-01   4.2775376e+00
   1.7745825e+01  -2.3767771e+01   4.0000000e+02   1.9204465e+00   4.9701247e-01   4.1105148e+00
   1.7707008e+01  -2.3891196e+01   4.0000000e+02   1.9361326e+00   5.0051691e-01   3.9414206e+00
   1.7671979e+01  -2.4015573e+01   4.0000000e+02   1.9429682e+00   4.9492276e-01   3.7712257e+00
   1.7640775e+01  -2.4140805e+01   4.0000000e+02   1.9409105e+00   4.8068862e-01   3.6008418e+00
   1.7613434e+01  -2.4266792e+01   4.0000000e+02   1.9299570e+00   4.5838327e-01   3.4311235e+00
   1.7589987e+01  -2.4393434e+01   4.0000000e+02   1.9101475e+00   4.2867957e-01   3.2628657e+00
   1.7570465e+01  -2.4520629e+01   4.0000000e+02   1.8815740e+00   3.9232507e-01   3.0968095e+00
   1.7554895e+01  -2.4648278e+01   4.0000000e+02   1.8443866e+00   3.5012218e-01   2.9336391e+00
   1.7543302e+01  -2.4776277e+01   4.0000000e+02   1.7988048e+00   3.0290479e-01   2.7739968e+00
   1.7535707e+01  -2.4904523e+01   4.0000000e+02   1.7451238e+00   2.5151308e-01   2.6184765e+00
   1.7532129e+01  -2.5032913e+01   4.0000000e+02   1.6837216e+00   1.9676722e-01   2.4676253e+00
   1.7532583e+01  -2.5161344e+01   4.0000000e+02   1.6150590e+00   1.3944835e-01   2.3219412e+00
   1.7537082e+01  -2.5289710e+01   4.0000000e+02   1.5396806e+00   8.0278341e-02   2.1818725e+00
   1.7545634e+01  -2.5417909e+01   4.0000000e+02   1.4582005e+00   1.9906380e-02   2.0478042e+00
   1.7558246e+01  -2.5545834e+01   4.0000000e+02   1.3712965e+00  -4.1102481e-02   1.9200613e+00
   1.7574920e+01  -2.5673382e+01   4.0000000e+02   1.2796842e+00  -1.0226971e-01   1.7988945e+00
   1.7595657e+01  -2.5800448e+01   4.0000000e+02   1.1841007e+00  -1.6320501e-01   1.6844812e+00
   1.7620451e+01  -2.5926927e+01   4.0000000e+02   1.0852771e+00  -2.2359258e-01   1.5769229e+00
   1.7649296e+01  -2.6052713e+01   4.0000000e+02   9.8391583e-01  -2.8318840e-01   1.4762443e+00
   1.7682181e+01  -2.6177704e+01   4.0000000e+02   8.8066113e-01  -3.4179902e-01   1.3823949e+00
   1.7719093e+01  -2.6301795e+01   4.0000000e+02   7.7608319e-01  -3.9926565e-01   1.2952598e+00
   1.7760012e+01  -2.6424881e+01   4.0000000e+02   6.7065726e-01  -4.5543967e-01   1.2146688e+00
   1.7804919e+01  -2.6546861e+01   4.0000000e+02   5.6474805e-01  -5.1017347e-01   1.1404041e+00
   1.7853789e+01  -2.6667631e+01   4.0000000e+02   4.5860903e-01  -5.6329540e-01   1.0722211e+00
   1.7906593e+01  -2.6787090e+01   4.0000000e+02   3.5237841e-01  -6.1460015e-01   1.0098612e+00
   1.7963299e+01  -2.6905135e+01   4.0000000e+02   2.4609208e-01  -6.6384283e-01   9.5306824e-01
   1.8023872e+01  -2.7021668e+01   4.0000000e+02   1.3969331e-01  -7.1073709e-01   9.0160212e-01
   1.8088273e+01  -2.7136588e+01   4.0000000e+02   3.3062253e-02  -7.5495958e-01   8.5525250e-01
   1.8156458e+01  -2.7249797e+01   4.0000000e+02  -7.3961212e-02  -7.9615908e-01   8.1384685e-01
   1.8228383e+01  -2.7361197e+01   4.0000000e+02  -1.8154475e-01  -8.3397653e-01   7.7725071e-01
   1.8303995e+01  -2.7470694e+01   4.0000000e+02  -2.8983308e-01  -8.6805458e-01   7.4537240e-01
   1.8383241e+01  -2.7578191e+01   4.0000000e+02  -3.9891310e-01  -8.9806697e-01   7.1814852e-01
   1.8466065e+01  -2.7683597e+01   4.0000000e+02  -5.0879403e-01  -9.2373268e-01   6.9553589e-01
   1.8552404e+01  -2.7786818e+01   4.0000000e+02  -6.1937791e-01  -9.4483285e-01   6.7749678e-01
   1.8642194e+01  -2.7887765e+01   4.0000000e+02  -7.3045465e-01  -9.6122575e-01   6.6398006e-01
   1.8735367e+01  -2.7986350e+01   4.0000000e+02  -8.4169358e-01  -9.7285374e-01   6.5490518e-01
   1.8831850e+01  -2.8082485e+01   4.0000000e+02  -9.5264695e-01  -9.7974536e-01   6.5014708e-01
   1.8931569e+01  -2.8176085e+01   4.0000000e+02  -1.0627671e+00  -9.8201211e-01   6.4952413e-01
   1.9034443e+01  -2.8267069e+01   4.0000000e+02  -1.1714254e+00  -9.7983485e-01   6.5279858e-01
   1.9140391e+01  -2.8355355e+01   4.0000000e+02  -1.2779370e+00  -9.7345457e-01   6.5966880e-01
   1.9249326e+01  -2.8440864e+01   4.0000000e+02  -1.3815911e+00  -9.6314934e-01   6.6978461e-01
   1.9361160e+01  -2.8523521e+01   4.0000000e+02  -1.4816826e+00  -9.4921491e-01   6.8275970e-01
   1.9475799e+01  -2.8603251e+01   4.0000000e+02  -1.5775358e+00  -9.3194421e-01   6.9819065e-01
   1.9593148e+01  -2.8679982e+01   4.0000000e+02  -1.6685327e+00  -9.1160729e-01   7.1567974e-01
   1.9713108e+01  -2.8753646e+01   4.0000000e+02  -1.7541305e+00  -8.8843292e-01   7.3486329e-01
   1.9835577e+01  -2.8824176e+01   4.0000000e+02  -1.8338726e+00  -8.6259708e-01   7.5543143e-01
   1.9960450e+01  -2.8891508e+01   4.0000000e+02  -1.9073958e+00  -8.3421339e-01   7.7715191e-01
   2.0087619e+01  -2.8955581e+01   4.0000000e+02  -1.9744287e+00  -8.0332954e-01   7.9988712e-01
   2.0216974e+01  -2.9016337e+01   4.0000000e+02  -2.0347858e+00  -7.6992885e-01   8.2360496e-01
   2.0348402e+01  -2.9073720e+01   4.0000000e+02  -2.0883561e+00  -7.3393701e-01   8.4838281e-01
   2.0481786e+01  -2.9127678e+01   4.0000000e+02  -2.1350898e+00  -6.9523211e-01   8.7440971e-01
   2.0617009e+01  -2.9178162e+01   4.0000000e+02  -2.1749842e+00  -6.5365890e-01   9.0197568e-01
   2.0753950e+01  -2.9225125e+01   4.0000000e+02  -2.2080690e+00  -6.0904679e-01   9.3145960e-01
   2.0892486e+01  -2.9268524e+01   4.0000000e+02  -2.2343938e+00  -5.6122850e-01   9.6331542e-01
   2.1032494e+01  -2.9308319e+01   4.0000000e+02  -2.2540201e+00  -5.1006094e-01   9.9805089e-01
   2.1173847e+01  -2.9344474e+01   4.0000000e+02  -2.2670150e+00  -4.5544832e-01   1.0362098e+00
   2.1316416e+01  -2.9376955e+01   4.0000000e+02  -2.2734512e+00  -3.9736438e-01   1.0783452e+00
   2.1460072e+01  -2.9405732e+01   4.0000000e+02  -2.2734111e+00  -3.3587296e-01   1.1250002e+00
   2.1604683e+01  -2.9430779e+01   4.0000000e+02  -2.2669948e+00  -2.7114906e-01   1.1766847e+00
   2.1750119e+01  -2.9452072e+01   4.0000000e+02  -2.2543324e+00  -2.0349323e-01   1.2338481e+00
   2.1896245e+01  -2.9469592e+01   4.0000000e+02  -2.2355975e+00  -1.3334657e-01   1.2968605e+00
   2.2042927e+01  -2.9483322e+01   4.0000000e+02  -2.2110236e+00  -6.1293291e-02   1.3659836e+00
   2.2190030e+01  -2.9493249e+01   4.0000000e+02  -2.1809177e+00   1.1940658e-02   1.4413516e+00
   2.2337419e+01  -2.9499366e+01   4.0000000e+02  -2.1456720e+00   8.5498520e-02   1.5229533e+00
   2.2484958e+01  -2.9501665e+01   4.0000000e+02  -2.1057751e+00   1.5841421e-01   1.6106035e+00
   2.2632511e+01  -2.9500144e+01   4.0000000e+02  -2.0618129e+00   2.2964034e-01   1.7039423e+00
   2.2779941e+01  -2.9494806e+01   4.0000000e+02  -2.0144658e+00   2.9808419e-01   1.8024271e+00
   2.2927114e+01  -2.9485655e+01   4.0000000e+02  -1.9645004e+00   3.6265306e-01   1.9053317e+00
   2.3073893e+01  -2.9472699e+01   4.0000000e+02  -1.9127543e+00   4.2229530e-01   2.0117586e+00
   2.3220143e+01  -2.9455950e+01   4.0000000e+02  -1.8601134e+00   4.7604689e-01   2.1206625e+00
   2.3365730e+01  -2.9435425e+01   4.0000000e+02  -1.8074868e+00   5.2307097e-01   2.2308790e+00
   2.3510521e+01  -2.9411142e+01   4.0000000e+02  -1.7557806e+00   5.6269408e-01   2.3411556e+00
   2.3654382e+01  -2.9383123e+01   4.0000000e+02  -1.7058700e+00   5.9442999e-01   2.4501926e+00
   2.3797183e+01  -2.9351395e+01   4.0000000e+02  -1.6585691e+00   6.1799504e-01   2.5566909e+00
   2.3938794e+01  -2.9315986e+01   4.0000000e+02  -1.6146122e+00   6.3331392e-01   2.6593844e+00
   2.4079086e+01  -2.9276930e+01   4.0000000e+02  -1.5746313e+00   6.4051129e-01   2.7570828e+00
   2.4217933e+01  -2.9234263e+01   4.0000000e+02  -1.5391442e+00   6.3989848e-01   2.8487014e+00
   2.4355209e+01  -2.9188023e+01   4.0000000e+02  -1.5085492e+00   6.3195158e-01   2.9332821e+00
   2.4490792e+01  -2.9138253e+01   4.0000000e+02  -1.4831196e+00   6.1728179e-01   3.0100155e+00
   2.4624561e+01  -2.9085000e+01   4.0000000e+02  -1.4630094e+00   5.9660686e-01   3.0782452e+00
   2.4756397e+01  -2.9028311e+01   4.0000000e+02  -1.4482653e+00   5.7072307e-01   3.1374668e+00
   2.4886184e+01  -2.8968238e+01   4.0000000e+02  -1.4388342e+00   5.4047359e-01   3.1873270e+00
   2.5013808e+01  -2.8904837e+01   4.0000000e+02  -1.4345795e+00   5.0672373e-01   3.2276129e+00
   2.5139158e+01  -2.8838164e+01   4.0000000e+02  -1.4353009e+00   4.7034002e-01   3.2582381e+00
   2.5262125e+01  -2.8768281e+01   4.0000000e+02  -1.4407470e+00   4.3216897e-01   3.2792334e+00
   2.5382605e+01  -2.8695251e+01   4.0000000e+02  -1.4506358e+00   3.9302230e-01   3.2907317e+00
   2.5500495e+01  -2.8619139e+01   4.0000000e+02  -1.4646725e+00   3.5366593e-01   3.2929538e+00
   2.5615694e+01  -2.8540015e+01   4.0000000e+02  -1.4825623e+00   3.1480767e-01   3.2861994e+00
   2.5728107e+01  -2.8457949e+01   4.0000000e+02  -1.5040274e+00   2.7708773e-01   3.2708328e+00
   2.6355445e+01  -2.8089973e+01   4.0000000e+02  -1.5517970e+00   1.2234157e-02   3.1550249e+00
   2.6449408e+01  -2.7991713e+01   4.0000000e+02  -1.5921379e+00  -8.6937348e-03   3.0986681e+00
   2.6540080e+01  -2.7891132e+01   4.0000000e+02  -1.6351688e+00  -2.6218088e-02   3.0375940e+00
   2.6627397e+01  -2.7788315e+01   4.0000000e+02  -1.6809082e+00  -4.0430720e-02   2.9720804e+00
   2.6711295e+01  -2.7683346e+01   4.0000000e+02  -1.7293671e+00  -5.1499729e-02   2.9023017e+00
   2.6791717e+01  -2.7576312e+01   4.0000000e+02  -1.7805168e+00  -5.9662700e-02   2.8283216e+00
   2.6868606e+01  -2.7467302e+01   4.0000000e+02  -1.8342666e+00  -6.5205948e-02   2.7500907e+00
   2.6941911e+01  -2.7356404e+01   4.0000000e+02  -1.8904387e+00  -6.8449672e-02   2.6674512e+00
   2.7011584e+01  -2.7243711e+01   4.0000000e+02  -1.9487451e+00  -6.9730458e-02   2.5801588e+00
   2.7077579e+01  -2.7129314e+01   4.0000000e+02  -2.0087805e+00  -6.9381282e-02   2.4879015e+00
   2.7139855e+01  -2.7013306e+01   4.0000000e+02  -2.0700149e+00  -6.7720387e-02   2.3903345e+00
   2.7198373e+01  -2.6895781e+01   4.0000000e+02  -2.1318018e+00  -6.5038073e-02   2.2871139e+00
   2.7253098e+01  -2.6776834e+01   4.0000000e+02  -2.1933950e+00  -6.1590840e-02   2.1779320e+00
   2.7303999e+01  -2.6656561e+01   4.0000000e+02  -2.2539751e+00  -5.7598565e-02   2.0625494e+00
   2.7351048e+01  -2.6535059e+01   4.0000000e+02  -2.3126844e+00  -5.3245214e-02   1.9408208e+00
   2.7394220e+01  -2.6412423e+01   4.0000000e+02  -2.3686669e+00  -4.8683064e-02   1.8127095e+00
   2.7433492e+01  -2.6288753e+01   4.0000000e+02  -2.4211057e+00  -4.4041538e-02   1.6783025e+00
   2.7468848e+01  -2.6164146e+01   4.0000000e+02  -2.4692652e+00  -3.9437643e-02   1.5378017e+00
   2.7500273e+01  -2.6038700e+01   4.0000000e+02  -2.5125235e+00  -3.4984446e-02   1.3915142e+00
   2.7527753e+01  -2.5912516e+01   4.0000000e+02  -2.5503978e+00  -3.0802196e-02   1.2398355e+00
   2.7551281e+01  -2.5785691e+01   4.0000000e+02  -2.5825621e+00  -2.7030398e-02   1.0832177e+00
   2.7570851e+01  -2.5658325e+01   4.0000000e+02  -2.6088494e+00  -2.3834593e-02   9.2214700e-01
   2.7586461e+01  -2.5530518e+01   4.0000000e+02  -2.6292458e+00  -2.1414128e-02   7.5711321e-01
   2.7598111e+01  -2.5402369e+01   4.0000000e+02  -2.6438719e+00  -2.0005652e-02   5.8858126e-01
   2.7605805e+01  -2.5273977e+01   4.0000000e+02  -2.6529546e+00  -1.9886045e-02   4.1697314e-01
   2.7609551e+01  -2.5145441e+01   4.0000000e+02  -2.6567915e+00  -2.1371571e-02   2.4265512e-01
   2.7609357e+01  -2.5016861e+01   4.0000000e+02  -2.6557114e+00  -2.4812859e-02   6.5933093e-02
   2.7605236e+01  -2.4888335e+01   4.0000000e+02  -2.6500331e+00  -3.0591201e-02  -1.1294352e-01
   2.7597204e+01  -2.4759962e+01   4.0000000e+02  -2.6400268e+00  -3.9109617e-02  -2.9376374e-01
   2.7585278e+01  -2.4631839e+01   4.0000000e+02  -2.6258799e+00  -5.0782516e-02  -4.7633719e-01
   2.7569480e+01  -2.4504064e+01   4.0000000e+02  -2.6076733e+00  -6.6025306e-02  -6.6045836e-01
   2.7549834e+01  -2.4376734e+01   4.0000000e+02  -2.5853660e+00  -8.5240862e-02  -8.4587780e-01
   2.7526364e+01  -2.4249945e+01   4.0000000e+02  -2.5587930e+00  -1.0880587e-01  -1.0322694e+00
   2.7499101e+01  -2.4123793e+01   4.0000000e+02  -2.5276767e+00  -1.3705869e-01  -1.2191937e+00
   2.7468076e+01  -2.3998372e+01   4.0000000e+02  -2.4916477e+00  -1.7028494e-01  -1.4060794e+00
   2.7433323e+01  -2.3873777e+01   4.0000000e+02  -2.4502785e+00  -2.0870522e-01  -1.5922009e+00
   2.7394878e+01  -2.3750101e+01   4.0000000e+02  -2.4031220e+00  -2.5246562e-01  -1.7766772e+00
   2.7352780e+01  -2.3627436e+01   4.0000000e+02  -2.3497550e+00  -3.0162998e-01  -1.9584764e+00
   2.7307070e+01  -2.3505874e+01   4.0000000e+02  -2.2898223e+00  -3.5617512e-01  -2.1364325e+00
   2.7257792e+01  -2.3385504e+01   4.0000000e+02  -2.2230746e+00  -4.1599188e-01  -2.3092770e+00
   2.7204991e+01  -2.3266416e+01   4.0000000e+02  -2.1494024e+00  -4.8088708e-01  -2.4756706e+00
   2.7148715e+01  -2.3148697e+01   4.0000000e+02  -2.0688583e+00  -5.5059323e-01  -2.6342471e+00
   2.7089014e+01  -2.3032435e+01   4.0000000e+02  -1.9816718e+00  -6.2477764e-01  -2.7836503e+00
   2.7025940e+01  -2.2917715e+01   4.0000000e+02  -1.8882500e+00  -7.0305810e-01  -2.9225780e+00
   2.6959549e+01  -2.2804620e+01   4.0000000e+02  -1.7891723e+00  -7.8501680e-01  -3.0498140e+00
   2.6889895e+01  -2.2693235e+01   4.0000000e+02  -1.6851755e+00  -8.7021376e-01  -3.1642532e+00
   2.6817037e+01  -2.2583640e+01   4.0000000e+02  -1.5771324e+00  -9.5820257e-01  -3.2649273e+00
   2.6741035e+01  -2.2475915e+01   4.0000000e+02  -1.4660289e+00  -1.0485386e+00  -3.3510138e+00
   2.6661951e+01  -2.2370139e+01   4.0000000e+02  -1.3529373e+00  -1.1407864e+00  -3.4218450e+00
   2.6579849e+01  -2.2266389e+01   4.0000000e+02  -1.2389892e+00  -1.2345238e+00  -3.4769113e+00
   2.6494794e+01  -2.2164739e+01   4.0000000e+02  -1.1253482e+00  -1.3293435e+00  -3.5158622e+00
   2.6406854e+01  -2.2065263e+01   4.0000000e+02  -1.0131881e+00  -1.4248480e+00  -3.5385034e+00
   2.6316096e+01  -2.1968034e+01   4.0000000e+02  -9.0366690e-01  -1.5206495e+00  -3.5447959e+00
   2.6222593e+01  -2.1873121e+01   4.0000000e+02  -7.9790683e-01  -1.6163653e+00  -3.5348587e+00
   2.6126416e+01  -2.1780593e+01   4.0000000e+02  -6.9697291e-01  -1.7116178e+00  -3.5089650e+00
   2.6027637e+01  -2.1690516e+01   4.0000000e+02  -6.0185361e-01  -1.8060369e+00  -3.4675433e+00
   2.5926334e+01  -2.1602955e+01   4.0000000e+02  -5.1344625e-01  -1.8992607e+00  -3.4111794e+00
   2.5822581e+01  -2.1517973e+01   4.0000000e+02  -4.3253544e-01  -1.9909500e+00  -3.3406079e+00
   2.5716457e+01  -2.1435631e+01   4.0000000e+02  -3.5978100e-01  -2.0807954e+00  -3.2567101e+00
   2.5608040e+01  -2.1355988e+01   4.0000000e+02  -2.9570186e-01  -2.1685352e+00  -3.1604978e+00
   2.5497412e+01  -2.1279101e+01   4.0000000e+02  -2.4066581e-01  -2.2539668e+00  -3.0530985e+00
   2.5384653e+01  -2.1205024e+01   4.0000000e+02  -1.9487899e-01  -2.3369661e+00  -2.9357250e+00
   2.5269847e+01  -2.1133811e+01   4.0000000e+02  -1.5838368e-01  -2.4174950e+00  -2.8096488e+00
   2.5153077e+01  -2.1065512e+01   4.0000000e+02  -1.3105609e-01  -2.4956123e+00  -2.6761562e+00
   2.5034429e+01  -2.1000176e+01   4.0000000e+02  -1.1261354e-01  -2.5714733e+00  -2.5365110e+00
   2.4913988e+01  -2.0937849e+01   4.0000000e+02  -1.0262504e-01  -2.6453264e+00  -2.3919044e+00
   2.4791842e+01  -2.0878576e+01   4.0000000e+02  -1.0052914e-01  -2.7174972e+00  -2.2434159e+00
   2.4668078e+01  -2.0822399e+01   4.0000000e+02  -1.0565590e-01  -2.7883709e+00  -2.0919678e+00
   2.4542785e+01  -2.0769358e+01   4.0000000e+02  -1.1725365e-01  -2.8583622e+00  -1.9382946e+00
   2.4416053e+01  -2.0719489e+01   4.0000000e+02  -1.3451808e-01  -2.9278834e+00  -1.7829162e+00
   2.4287972e+01  -2.0672830e+01   4.0000000e+02  -1.5662195e-01  -2.9973102e+00  -1.6261235e+00
   2.4158634e+01  -2.0629412e+01   4.0000000e+02  -1.8274417e-01  -3.0669430e+00  -1.4679767e+00
   2.4028130e+01  -2.0589266e+01   4.0000000e+02  -2.1209565e-01  -3.1369747e+00  -1.3083129e+00
   2.3896552e+01  -2.0552422e+01   4.0000000e+02  -2.4394040e-01  -3.2074595e+00  -1.1467691e+00
   2.3763993e+01  -2.0518904e+01   4.0000000e+02  -2.7761221e-01  -3.2782869e+00  -9.8281280e-01
   2.3630548e+01  -2.0488737e+01   4.0000000e+02  -3.1252318e-01  -3.3491658e+00  -8.1578386e-01
   2.3496310e+01  -2.0461942e+01   4.0000000e+02  -3.4816905e-01  -3.4196172e+00  -6.4493391e-01
   2.3361374e+01  -2.0438538e+01   4.0000000e+02  -3.8412595e-01  -3.4889727e+00  -4.6948033e-01
   2.3225834e+01  -2.0418541e+01   4.0000000e+02  -4.2004434e-01  -3.5563855e+00  -2.8865234e-01
   2.3089785e+01  -2.0401965e+01   4.0000000e+02  -4.5563740e-01  -3.6208475e+00  -1.0174223e-01
   2.2953324e+01  -2.0388823e+01   4.0000000e+02  -4.9066705e-01  -3.6812149e+00   9.1847513e-02
   2.2816545e+01  -2.0379124e+01   4.0000000e+02  -5.2493070e-01  -3.7362429e+00   2.9256993e-01
   2.2679544e+01  -2.0372873e+01   4.0000000e+02  -5.5824471e-01  -3.7846209e+00   5.0069156e-01
   2.2542418e+01  -2.0370077e+01   4.0000000e+02  -5.9042875e-01  -3.8250184e+00   7.1626753e-01
   2.2405262e+01  -2.0370736e+01   4.0000000e+02  -6.2129524e-01  -3.8561285e+00   9.3912530e-01
   2.2268172e+01  -2.0374850e+01   4.0000000e+02  -6.5063627e-01  -3.8767155e+00   1.1688517e+00
   2.2131245e+01  -2.0382417e+01   4.0000000e+02  -6.7821569e-01  -3.8856614e+00   1.4047918e+00
   2.1994576e+01  -2.0393431e+01   4.0000000e+02  -7.0376454e-01  -3.8820095e+00   1.6460635e+00
   2.1858260e+01  -2.0407884e+01   4.0000000e+02  -7.2697732e-01  -3.8650042e+00   1.8915733e+00
   2.1722394e+01  -2.0425766e+01   4.0000000e+02  -7.4751119e-01  -3.8341256e+00   2.1400423e+00
   2.1587073e+01  -2.0447065e+01   4.0000000e+02  -7.6498854e-01  -3.7891138e+00   2.3900496e+00
   2.1452392e+01  -2.0471765e+01   4.0000000e+02  -7.7900077e-01  -3.7299842e+00   2.6400726e+00
   2.1318446e+01  -2.0499849e+01   4.0000000e+02  -7.8911251e-01  -3.6570313e+00   2.8885357e+00
   2.1185328e+01  -2.0531297e+01   4.0000000e+02  -7.9486862e-01  -3.5708181e+00   3.1338637e+00
   2.1053132e+01  -2.0566086e+01   4.0000000e+02  -7.9580104e-01  -3.4721553e+00   3.3745245e+00
   2.0921953e+01  -2.0604193e+01   4.0000000e+02  -7.9143564e-01  -3.3620687e+00   3.6090739e+00
   2.0791883e+01  -2.0645591e+01   4.0000000e+02  -7.8130357e-01  -3.2417503e+00   3.8361960e+00
   2.0663013e+01  -2.0690249e+01   4.0000000e+02  -7.6495195e-01  -3.1125082e+00   4.0547248e+00
   2.0535436e+01  -2.0738137e+01   4.0000000e+02  -7.4195311e-01  -2.9757156e+00   4.2636530e+00
   2.0409243e+01  -2.0789220e+01   4.0000000e+02  -7.1192223e-01  -2.8327519e+00   4.4621376e+00
   2.0284523e+01  -2.0843462e+01   4.0000000e+02  -6.7453058e-01  -2.6849525e+00   4.6494893e+00
   2.0161365e+01  -2.0900825e+01   4.0000000e+02  -6.2952256e-01  -2.5335702e+00   4.8251496e+00
   2.0039859e+01  -2.0961268e+01   4.0000000e+02  -5.7673380e-01  -2.3797453e+00   4.9886646e+00
   1.9920092e+01  -2.1024748e+01   4.0000000e+02  -5.1610666e-01  -2.2244826e+00   5.1396633e+00
   1.9802151e+01  -2.1091220e+01   4.0000000e+02  -4.4770436e-01  -2.0686482e+00   5.2778278e+00
   1.9686120e+01  -2.1160637e+01   4.0000000e+02  -3.7172134e-01  -1.9129697e+00   5.4028765e+00
   1.9572085e+01  -2.1232948e+01   4.0000000e+02  -2.8849127e-01  -1.7580567e+00   5.5145432e+00
   1.9460129e+01  -2.1308104e+01   4.0000000e+02  -1.9848043e-01  -1.6044122e+00   5.6125769e+00
   1.9350335e+01  -2.1386049e+01   4.0000000e+02  -1.0229149e-01  -1.4524596e+00   5.6967371e+00
   1.9242784e+01  -2.1466728e+01   4.0000000e+02  -6.4268880e-04  -1.3025628e+00   5.7668022e+00
   1.9137555e+01  -2.1550084e+01   4.0000000e+02   1.0564590e-01  -1.1550480e+00   5.8225781e+00
   1.9034727e+01  -2.1636057e+01   4.0000000e+02   2.1567171e-01  -1.0102258e+00   5.8639094e+00
   1.8934378e+01  -2.1724585e+01   4.0000000e+02   3.2847380e-01  -8.6840560e-01   5.8906918e+00
   1.8836583e+01  -2.1815605e+01   4.0000000e+02   4.4305772e-01  -7.2990543e-01   5.9028845e+00
   1.8741417e+01  -2.1909051e+01   4.0000000e+02   5.5841552e-01  -5.9506522e-01   5.9005180e+00
   1.8648953e+01  -2.2004856e+01   4.0000000e+02   6.7354873e-01  -4.6425027e-01   5.8837016e+00
   1.8559262e+01  -2.2102951e+01   4.0000000e+02   7.8748462e-01  -3.3785499e-01   5.8526286e+00
   1.8472415e+01  -2.2203264e+01   4.0000000e+02   8.9928922e-01  -2.1630711e-01   5.8075792e+00
   1.8388478e+01  -2.2305724e+01   4.0000000e+02   1.0080825e+00  -1.0005984e-01   5.7489208e+00
   1.8307520e+01  -2.2410257e+01   4.0000000e+02   1.1130419e+00   1.0399541e-02   5.6771096e+00
   1.8229604e+01  -2.2516785e+01   4.0000000e+02   1.2134060e+00   1.1456854e-01   5.5926920e+00
   1.8154795e+01  -2.2625233e+01   4.0000000e+02   1.3084861e+00   2.1192492e-01   5.4962976e+00
   1.8083152e+01  -2.2735520e+01   4.0000000e+02   1.3976577e+00   3.0195027e-01   5.3886435e+00
   1.8014736e+01  -2.2847567e+01   4.0000000e+02   1.4803711e+00   3.8413028e-01   5.2705232e+00
   1.7949604e+01  -2.2961291e+01   4.0000000e+02   1.5561452e+00   4.5798029e-01   5.1428056e+00
   1.7887810e+01  -2.3076610e+01   4.0000000e+02   1.6245714e+00   5.2306009e-01   5.0064202e+00
   1.7829410e+01  -2.3193438e+01   4.0000000e+02   1.6853099e+00   5.7898564e-01   4.8623519e+00
   1.7774454e+01  -2.3311689e+01   4.0000000e+02   1.7380889e+00   6.2545811e-01   4.7116212e+00
   1.7722991e+01  -2.3431277e+01   4.0000000e+02   1.7827012e+00   6.6227268e-01   4.5552690e+00
   1.7675069e+01  -2.3552112e+01   4.0000000e+02   1.8189976e+00   6.8933376e-01   4.3943451e+00
   1.7630732e+01  -2.3674106e+01   4.0000000e+02   1.8468823e+00   7.0666769e-01   4.2298842e+00
   1.7590022e+01  -2.3797168e+01   4.0000000e+02   1.8663040e+00   7.1442727e-01   4.0628984e+00
   1.7552981e+01  -2.3921205e+01   4.0000000e+02   1.8772510e+00   7.1288938e-01   3.8943645e+00
   1.7519646e+01  -2.4046126e+01   4.0000000e+02   1.8797438e+00   7.0245616e-01   3.7252107e+00
   1.7490053e+01  -2.4171837e+01   4.0000000e+02   1.8738318e+00   6.8364193e-01   3.5563184e+00
   1.7464233e+01  -2.4298243e+01   4.0000000e+02   1.8595907e+00   6.5706433e-01   3.3885190e+00
   1.7442219e+01  -2.4425250e+01   4.0000000e+02   1.8371282e+00   6.2341555e-01   3.2225920e+00
   1.7424038e+01  -2.4552761e+01   4.0000000e+02   1.8065847e+00   5.8345547e-01   3.0592731e+00
   1.7409714e+01  -2.4680680e+01   4.0000000e+02   1.7681421e+00   5.3798307e-01   2.8992506e+00
   1.7399272e+01  -2.4808910e+01   4.0000000e+02   1.7220342e+00   4.8780891e-01   2.7431698e+00
   1.7392729e+01  -2.4937353e+01   4.0000000e+02   1.6685504e+00   4.3374513e-01   2.5916320e+00
   1.7390105e+01  -2.5065911e+01   4.0000000e+02   1.6080473e+00   3.7656834e-01   2.4451901e+00
   1.7391413e+01  -2.5194486e+01   4.0000000e+02   1.5409469e+00   3.1701460e-01   2.3043434e+00
   1.7396664e+01  -2.5322979e+01   4.0000000e+02   1.4677383e+00   2.5575702e-01   2.1695327e+00
   1.7405867e+01  -2.5451290e+01   4.0000000e+02   1.3889726e+00   1.9339388e-01   2.0411319e+00
   1.7419027e+01  -2.5579320e+01   4.0000000e+02   1.3052501e+00   1.3044306e-01   1.9194396e+00
   1.7436148e+01  -2.5706971e+01   4.0000000e+02   1.2172069e+00   6.7335796e-02   1.8046728e+00
   1.7457228e+01  -2.5834142e+01   4.0000000e+02   1.1254981e+00   4.4270662e-03   1.6969677e+00
   1.7482265e+01  -2.5960734e+01   4.0000000e+02   1.0307760e+00  -5.8006337e-02   1.5963729e+00
   1.7511251e+01  -2.6086648e+01   4.0000000e+02   9.3366853e-01  -1.1974549e-01   1.5028544e+00
   1.7544176e+01  -2.6211786e+01   4.0000000e+02   8.3475833e-01  -1.8061919e-01   1.4162996e+00
   1.7581028e+01  -2.6336047e+01   4.0000000e+02   7.3456684e-01  -2.4048543e-01   1.3365279e+00
   1.7621791e+01  -2.6459334e+01   4.0000000e+02   6.3353135e-01  -2.9921148e-01   1.2632994e+00
   1.7666444e+01  -2.6581549e+01   4.0000000e+02   5.3199692e-01  -3.5665417e-01   1.1963329e+00
   1.7714966e+01  -2.6702594e+01   4.0000000e+02   4.3020858e-01  -4.1265045e-01   1.1353202e+00
   1.7767330e+01  -2.6822373e+01   4.0000000e+02   3.2830819e-01  -4.6699913e-01   1.0799460e+00
[truncated: 3,642,157 more chars]
