# Supplementary material for: A high-resolution lithospheric magnetic field model over southern Africa based on a joint inversion of CHAMP, Swarm, WDMAM, and ground magnetic field data
Source: Copernicus journal article supplement (doi:10.5194/se-9-897-2018), 2018-07-16
Supplement: Supplementary file 1 [file se-9-897-2018-supplement.zip › SupplementaryMaterial/ReadMe.pdf]

Supplementary material to "***A high resolution lithospheric magnetic field model over southern Africa based on a joint inversion of CHAMP, Swarm, WDMAM and ground magnetic field data***" by F. Vervelidou, E. Thébaud, M. Korte, submitted to Solid Earth, Special Issue: Dynamics and interaction of processes in the Earth and its space environment: the perspective from low Earth orbiting satellites and beyond (SE/ANGEo inter-journal SI), March 2018.

The files ModelSAxxxkm.txt give the values of our regional lithospheric field model over southern Africa, at altitude xxx, which varies from 0 to 400. The altitude is given in km, in respect to Earth's mean reference radius of 6371.2 km, in the geocentric reference frame. The format of the files is the following:

Column 1: Longitude  
Column 2: Latitude  
Column 3: Altitude  
Column 4: X component (North)  
Column 5: Y component (East)  
Column 6: Z component (Down)

Coordinates are given in the geocentric reference frame.
